# Supplementary material for: The Impact II, a Very High-Resolution Quadrupole Time-of-Flight Instrument (QTOF) for Deep Shotgun Proteomics
Source: PubMed Central journal article supplement (PMC4587313; doi:10.1074/mcp.m114.047407), 2015-05-19

Raw file

Scan

Method

Score

m/z

Gene names

20150227\_yeast\_Top\_opt\_B1\_01\_1599

4175

TOF; CID

62.55

379.71

RPS26A

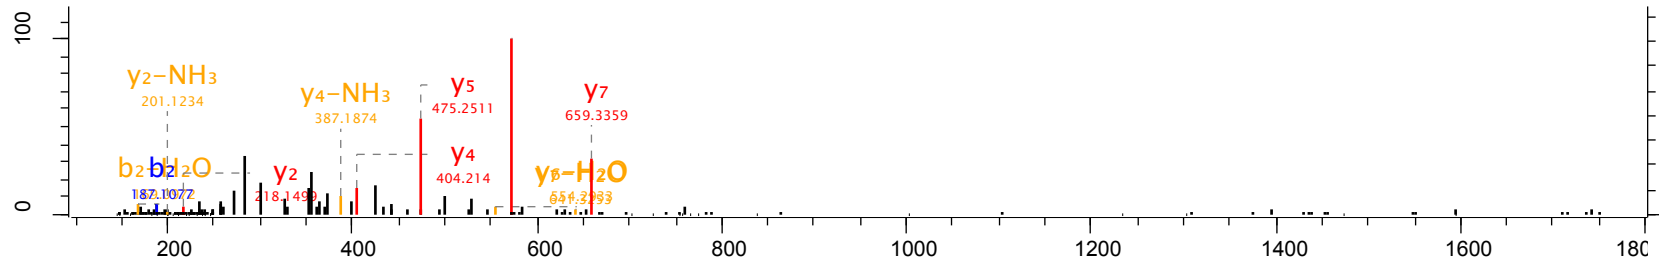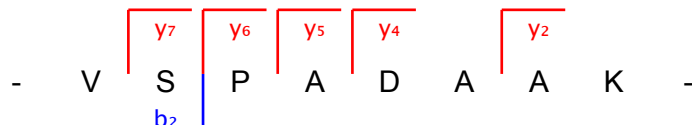

Raw file

Scan

Method

Score

m/z

Gene names

20150227\_yeast\_Top\_opt\_B1\_01\_1599

4839

TOF; CID

47.71

526.25

BTT1

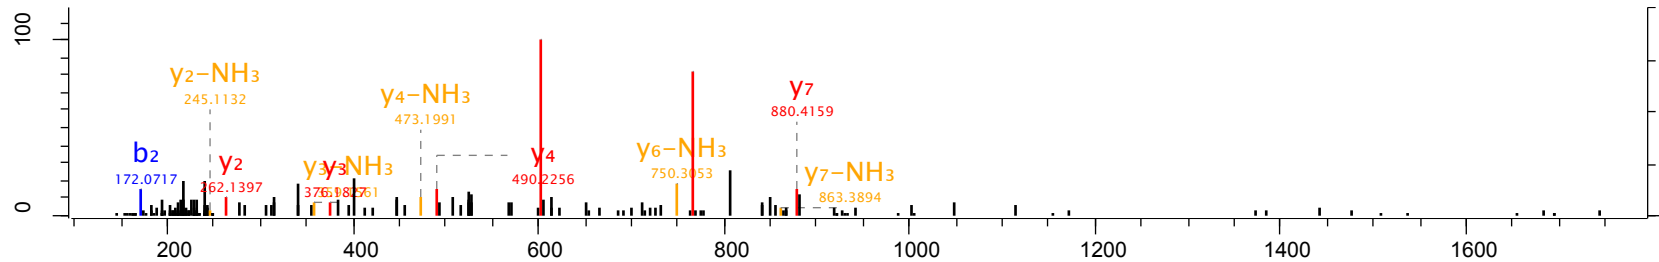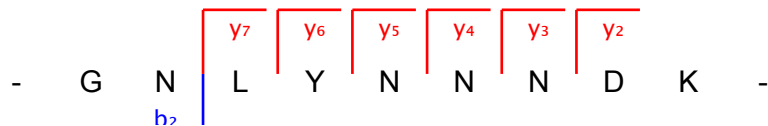

Raw file

Scan

Method

Score

m/z

Gene names

20150227\_yeast\_Top\_opt\_B1\_01\_1599

5971

TOF; CID

86.9

633.29

PEX3

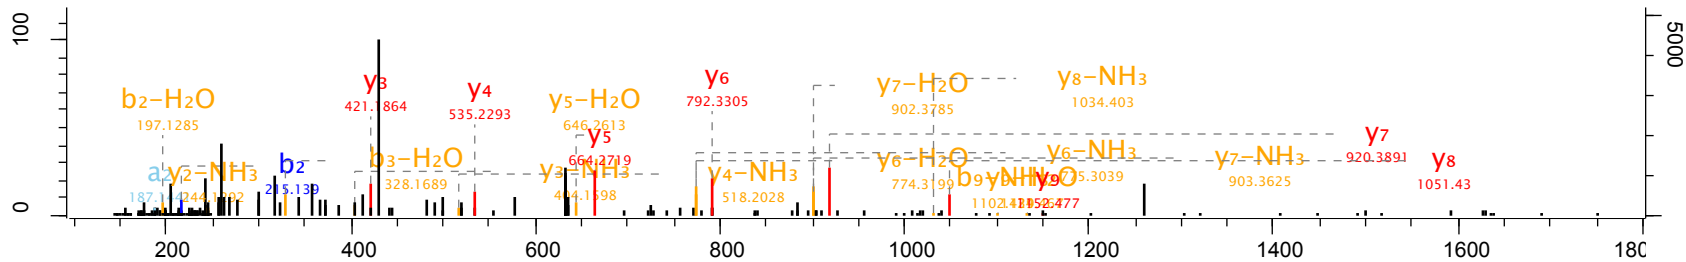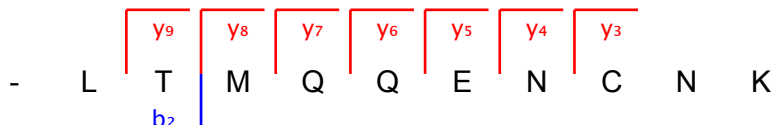

Raw file  
 20150227\_yeast\_Top\_opt\_B1\_01\_1599

| Scan | Method   | Score | m/z    |
|------|----------|-------|--------|
| 6212 | TOF; CID | 81.02 | 598.27 |

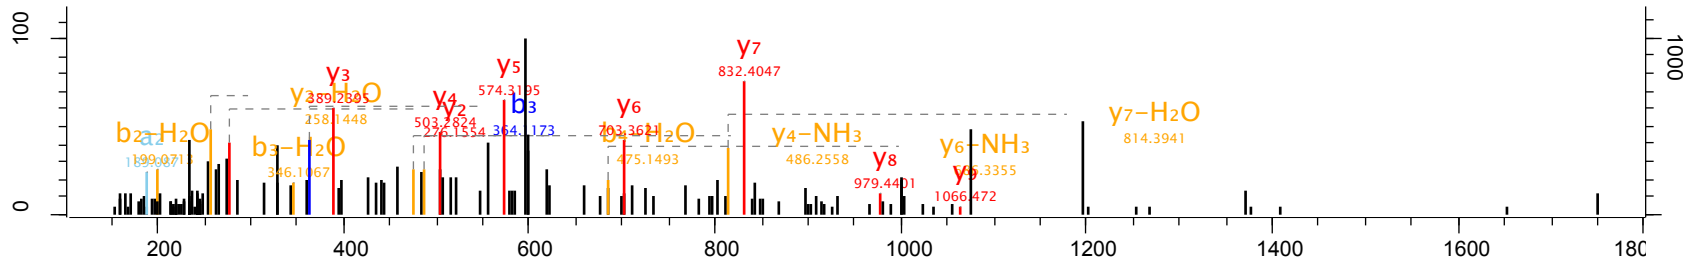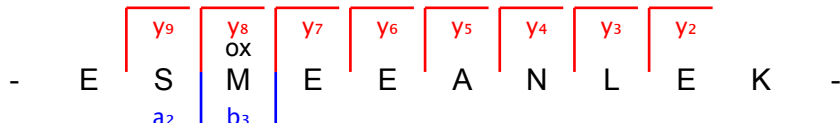

Raw file

Scan

Method

Score

m/z

Gene names

20150227\_yeast\_Top\_opt\_B1\_01\_1599

7040

TOF; CID

54.16

493.77

PDH1

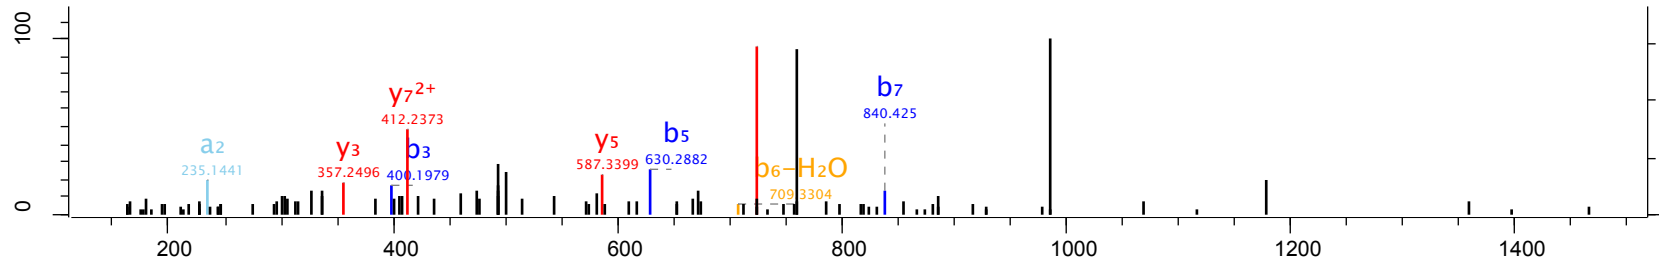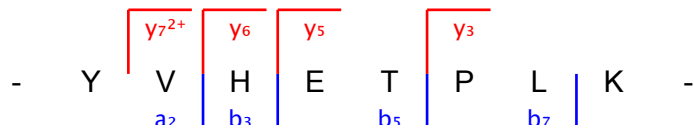

Raw file

Scan

Method

Score

m/z

Gene names

20150227\_yeast\_Top\_opt\_B1\_01\_1599

7436

TOF; CID

51.45

415.23

AMN1

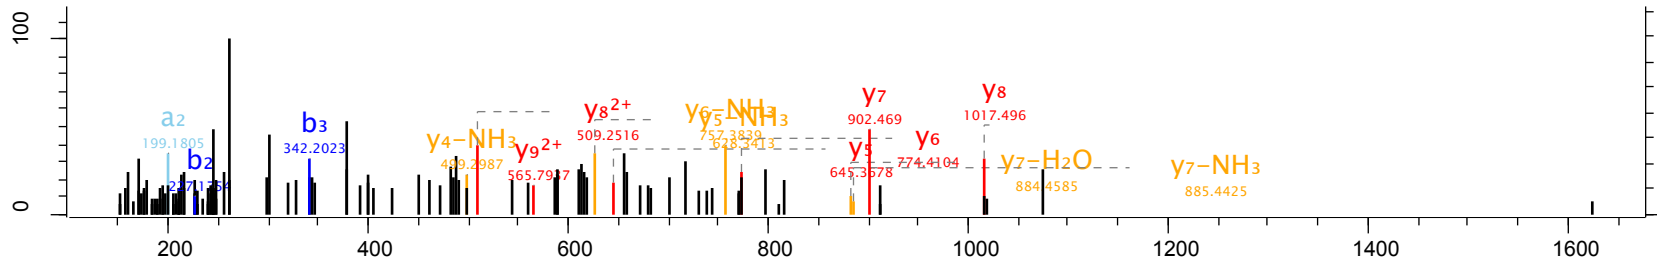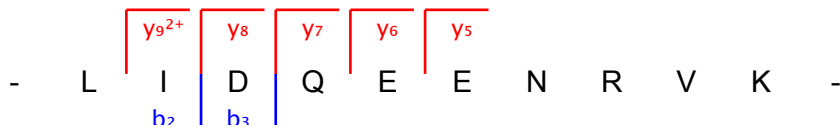

Raw file

Scan

Method

Score

m/z

Gene names

20150227\_yeast\_Top\_opt\_B1\_01\_1599

7956

TOF; CID

61.34

506.26

GAT1

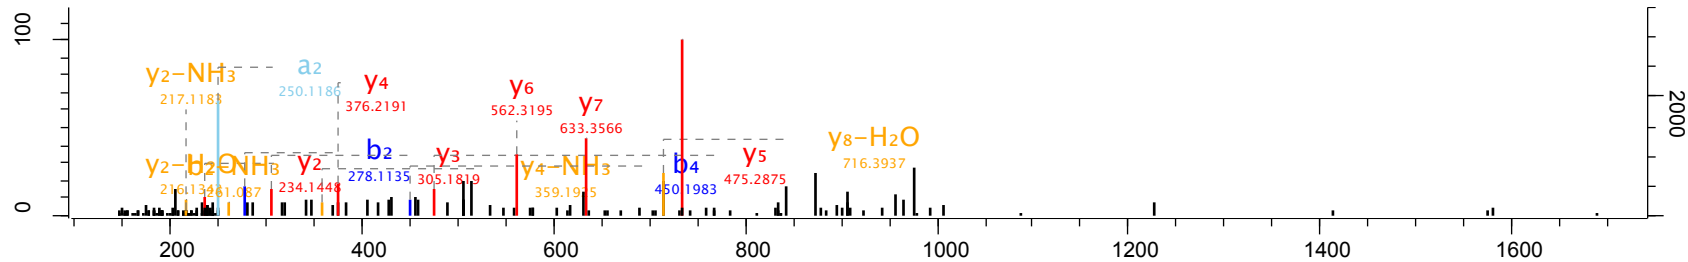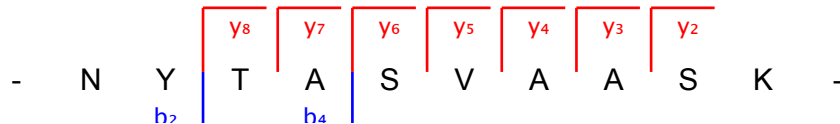

Raw file

20150227\_yeast\_Top\_opt\_B1\_01\_1599

Scan

8184

Method

TOF; CID

Score

64.78

m/z

409.25

Gene names

TEP1

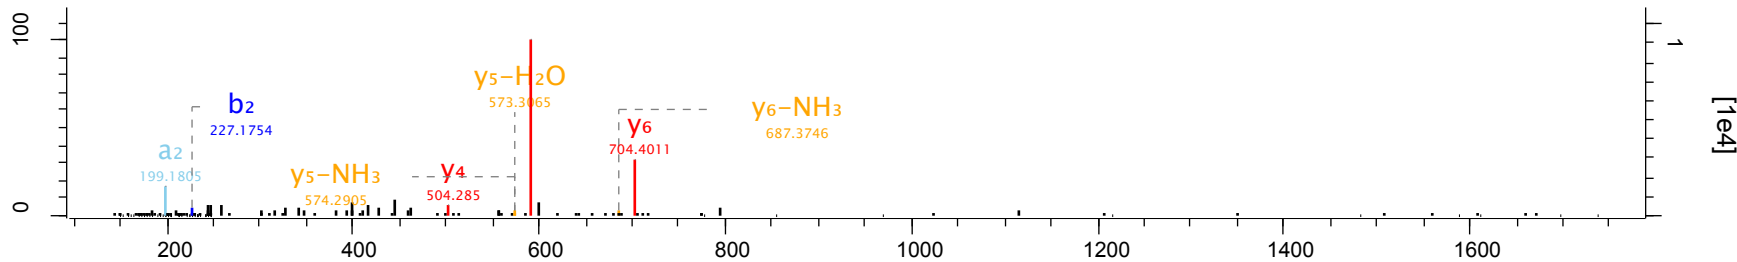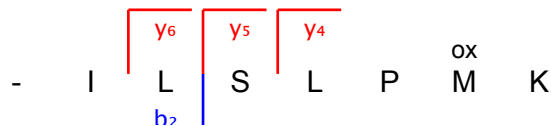



Raw file

20150227\_yeast\_Top\_opt\_B1\_01\_1599

Scan

8698

Method

TOF; CID

Score

137.8

m/z

787.37

Gene names

MHR1

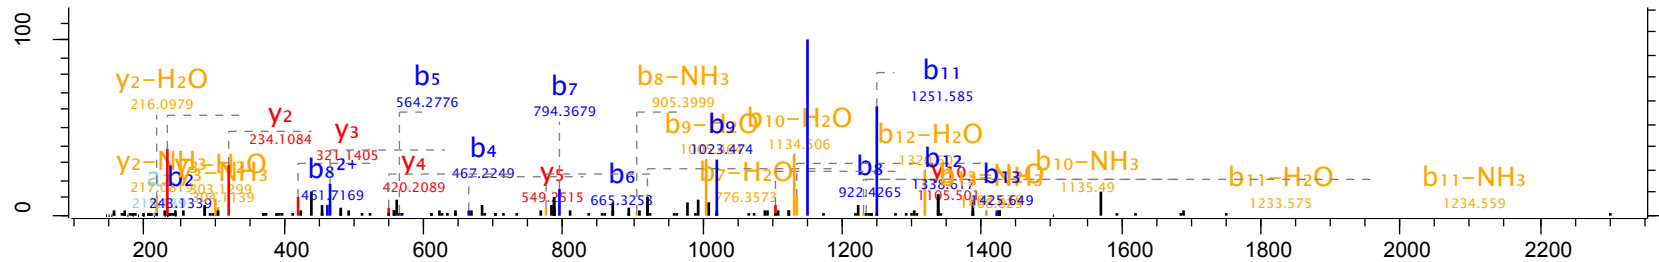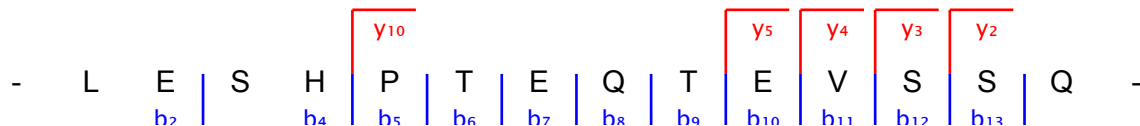

Raw file

20150227\_yeast\_Top\_opt\_B1\_01\_1599

Scan

Method

Score

m/z

Gene names

9114

TOF; CID

74.84

552.79

SBH1

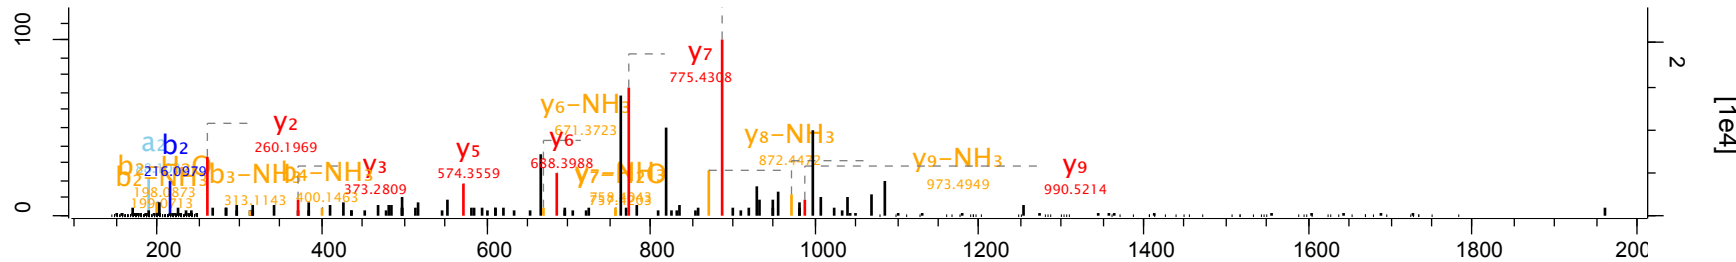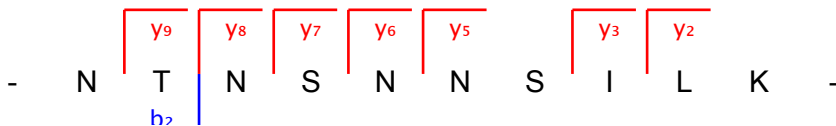

Raw file

20150227\_yeast\_Top\_opt\_B1\_01\_1599

Scan

Method

Score

m/z

Gene names

9775

TOF; CID

50.04

522.32

PES4

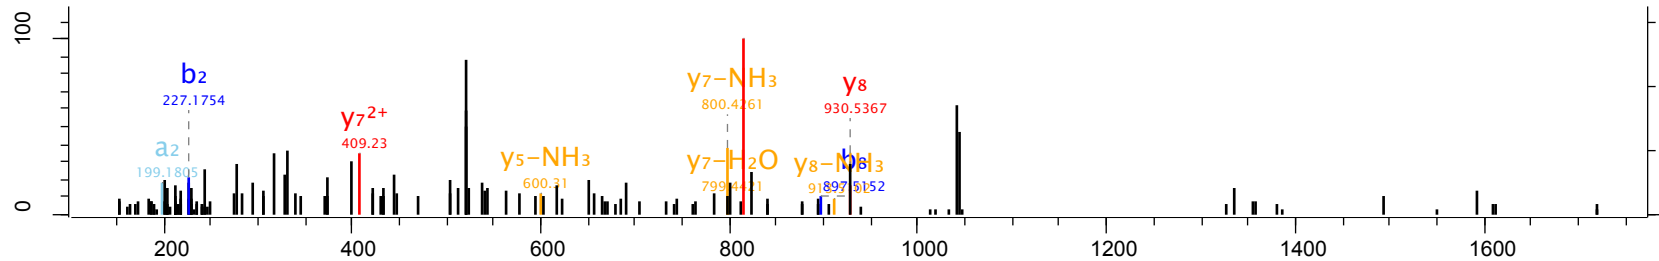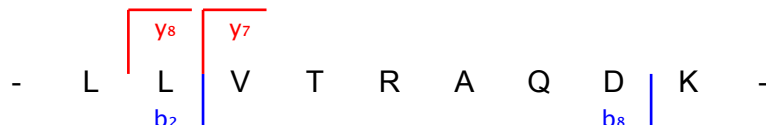

| Raw file                          | Scan  | Method   | Score | m/z    | Gene names |
|-----------------------------------|-------|----------|-------|--------|------------|
| 20150227_yeast_Top_opt_B1_01_1599 | 10171 | TOF; CID | 82.59 | 616.32 | PSH1       |

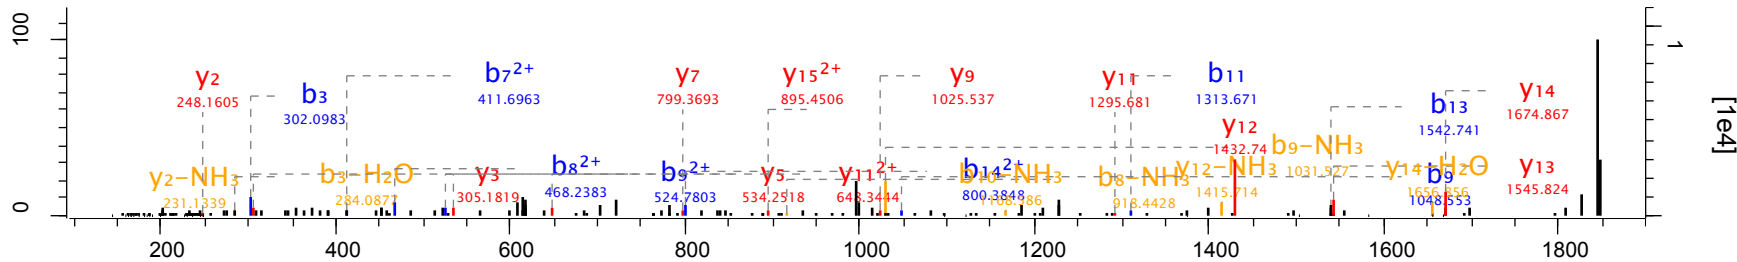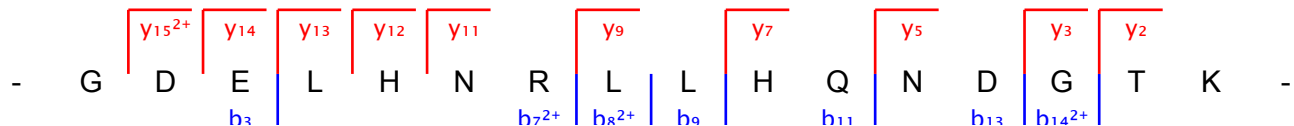

Raw file

20150227\_yeast\_Top\_opt\_B1\_01\_1599

Scan

10980

Method

TOF; CID

Score

46.8

m/z

720.83

Gene names

DSF2

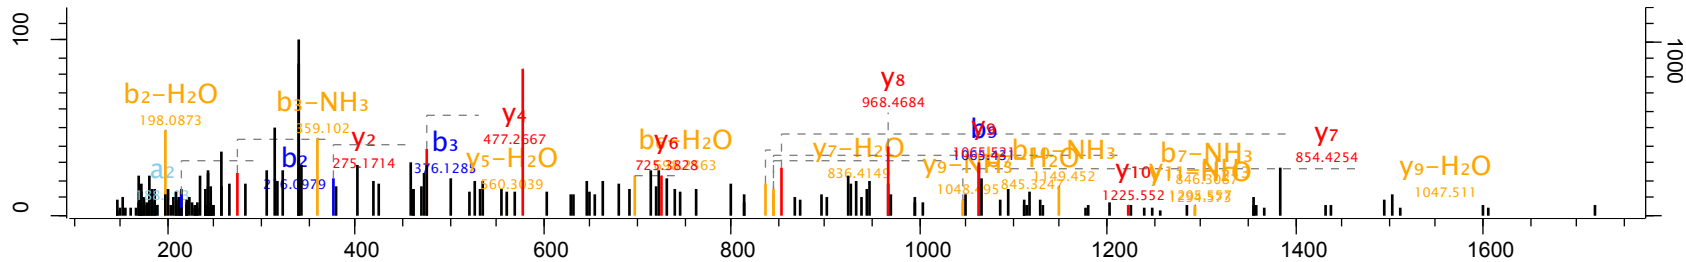

- Q S C P N E F T T Q K -

b<sub>2</sub> b<sub>3</sub> y<sub>10</sub> y<sub>9</sub> y<sub>8</sub> y<sub>7</sub> y<sub>6</sub> y<sub>5</sub> y<sub>4</sub> y<sub>2</sub>  
b<sub>9</sub>

Raw file

20150227\_yeast\_Top\_opt\_B1\_01\_1599

Scan

12023

Method

TOF; CID

Score

78.55

m/z

580.79

Gene names

DLS1

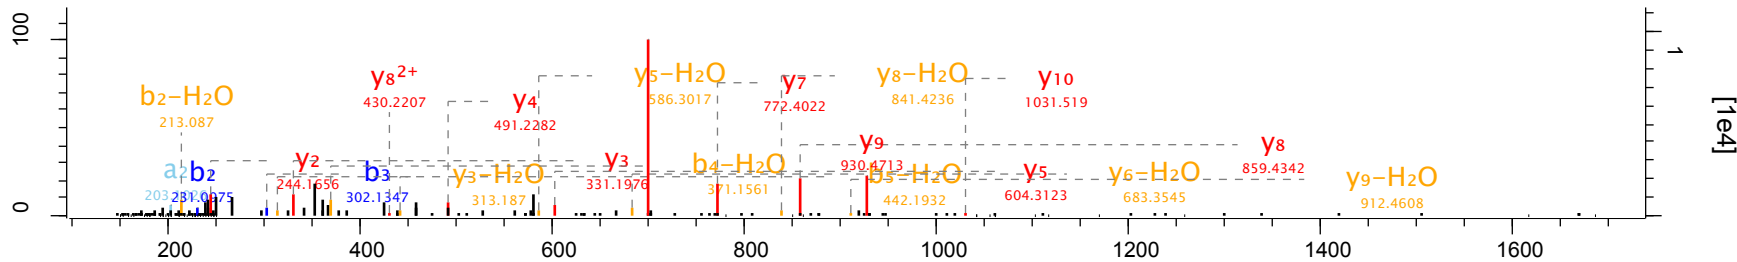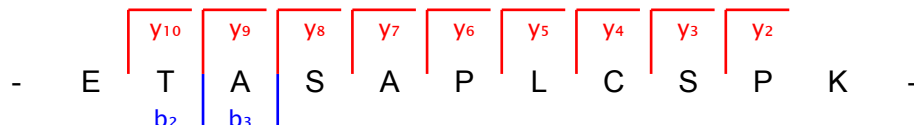

Raw file

Scan

Method

Score

m/z

Gene names

20150227\_yeast\_Top\_opt\_B1\_01\_1599

12126

TOF; CID

56.2

557.26

BAP2

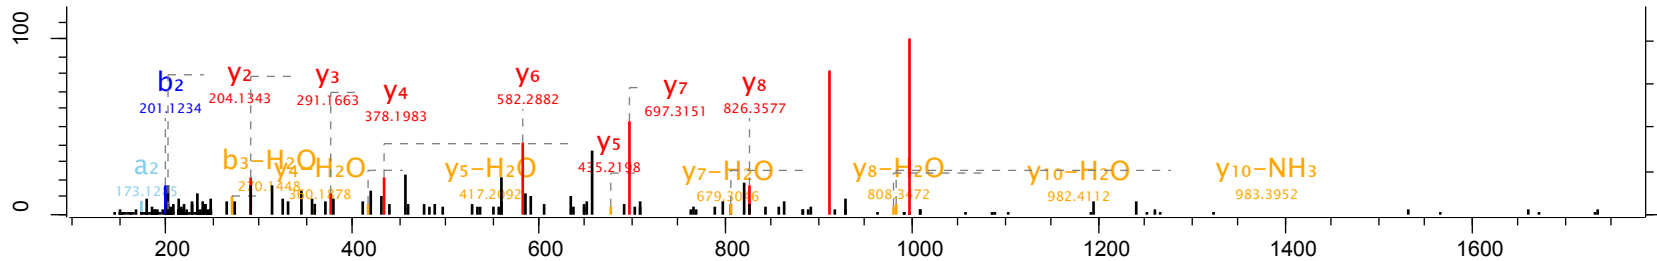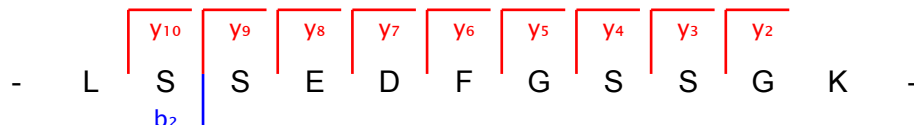

Raw file

20150227\_yeast\_Top\_opt\_B1\_01\_1599

Scan

12380

Method

TOF; CID

Score

42.8

m/z

460.76

Gene names

AVT3

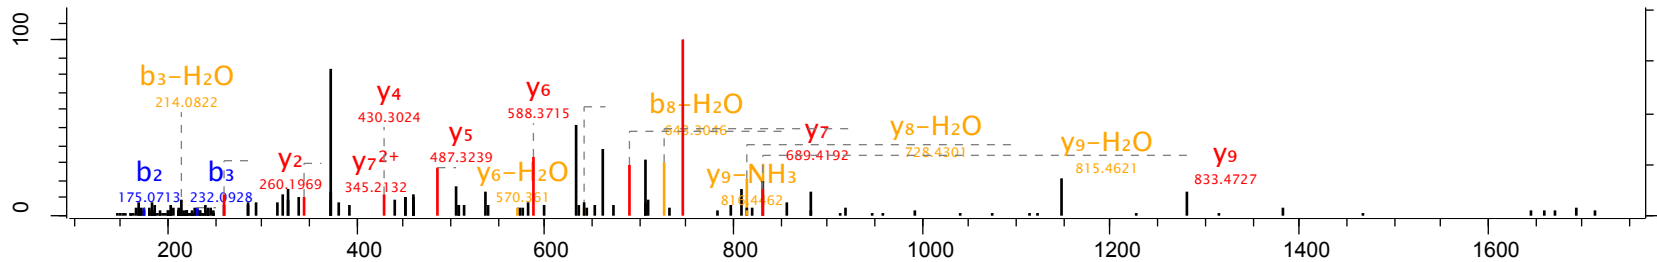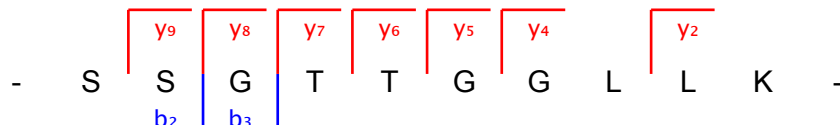



Raw file

20150227\_yeast\_Top\_opt\_B1\_01\_1599

Scan

13003

Method

TOF; CID

Score

145.29

m/z

646.32

Gene names

HST2

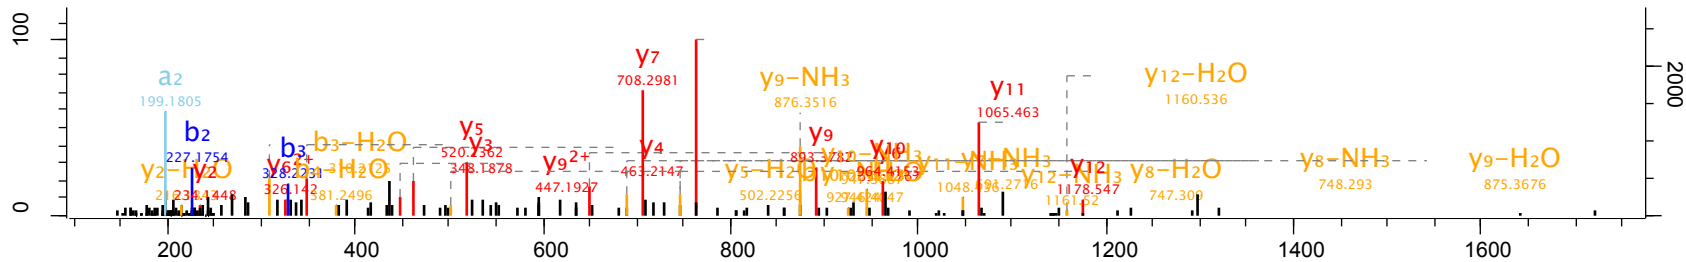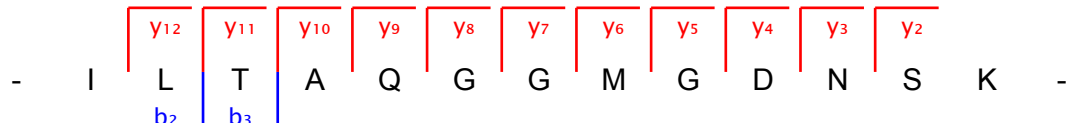

Raw file

20150227\_yeast\_Top\_opt\_B1\_01\_1599

Scan

13251

Method

TOF; CID

Score

74.84

m/z

558.31

Gene names

MDM32

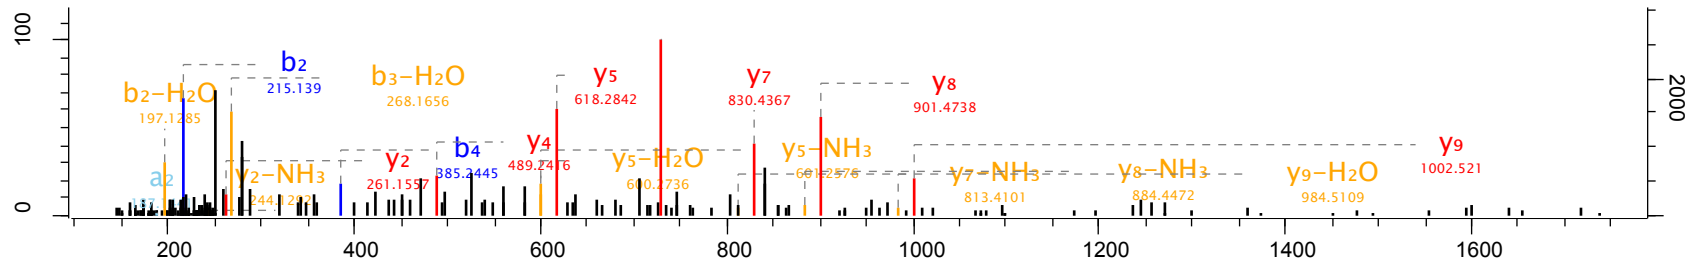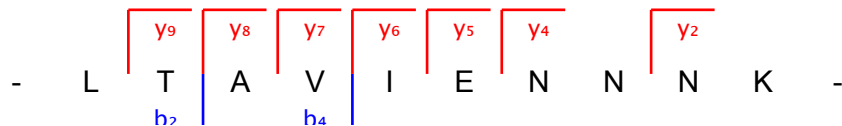

| Raw file                          | Scan  | Method   | Score | m/z   | Gene names |
|-----------------------------------|-------|----------|-------|-------|------------|
| 20150227_yeast_Top_opt_B1_01_1599 | 13944 | TOF; CID | 70.91 | 530.8 | NAM2       |

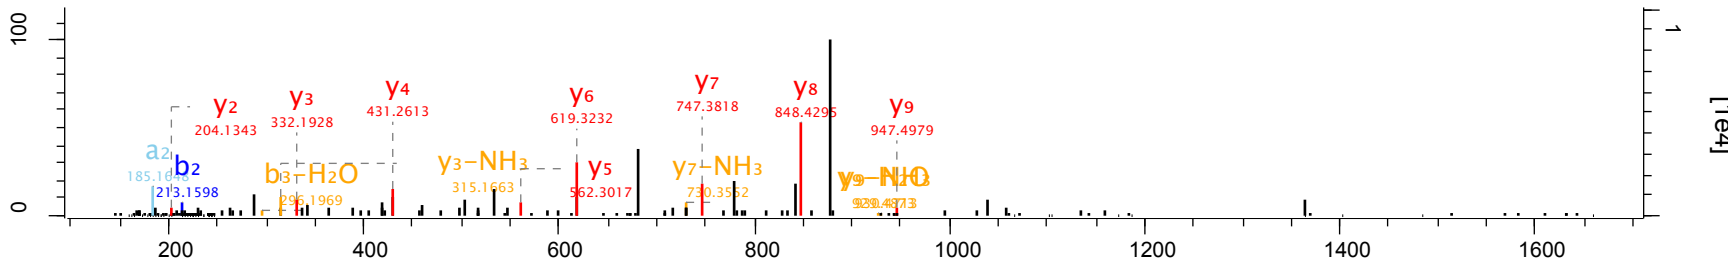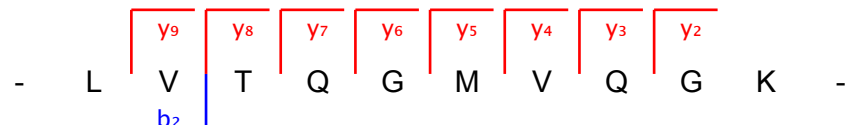

Raw file

20150227\_yeast\_Top\_opt\_B1\_01\_1599

Scan

15802

Method

TOF; CID

Score

68.31

m/z

405.21

Gene names

YDL016C

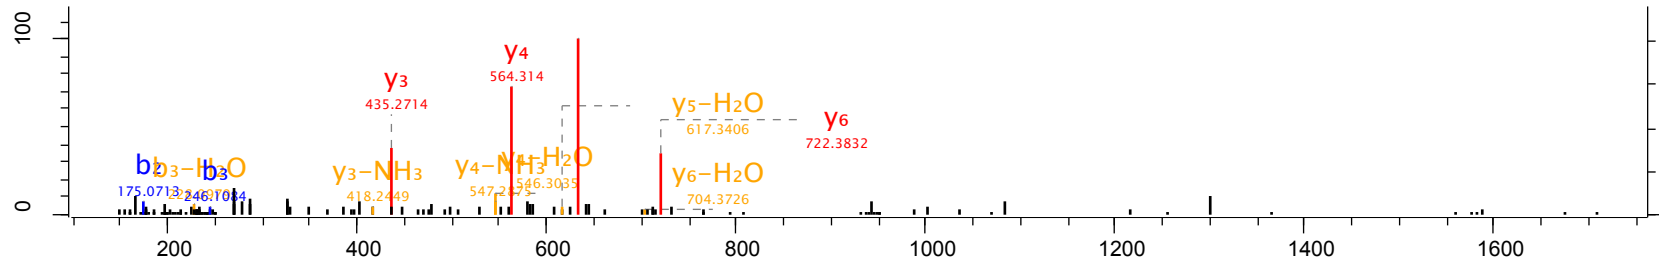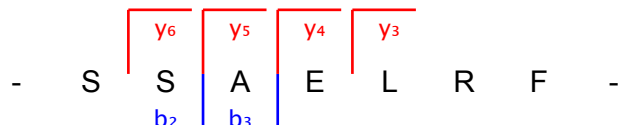

Raw file

Scan

Method

Score

m/z

Gene names

20150227\_yeast\_Top\_opt\_B1\_01\_1599

16018

TOF; CID

68.54

405.91

YIH1

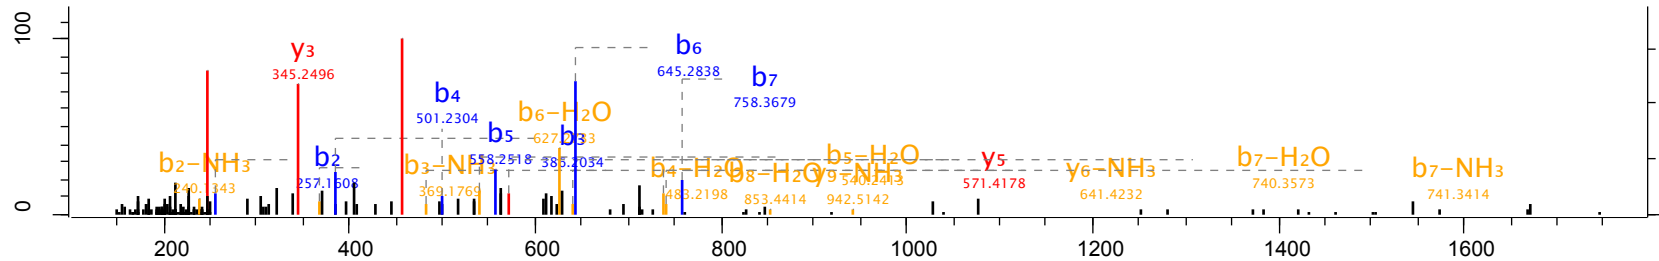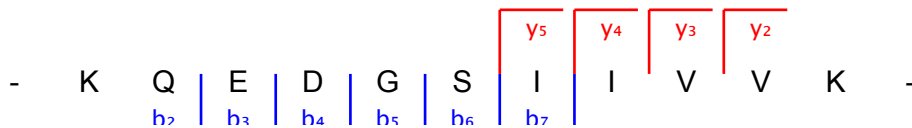

| Raw file                          | Scan  | Method   | Score | m/z    | Gene names |
|-----------------------------------|-------|----------|-------|--------|------------|
| 20150227_yeast_Top_opt_B1_01_1599 | 16166 | TOF; CID | 63.82 | 532.77 | PSY4       |

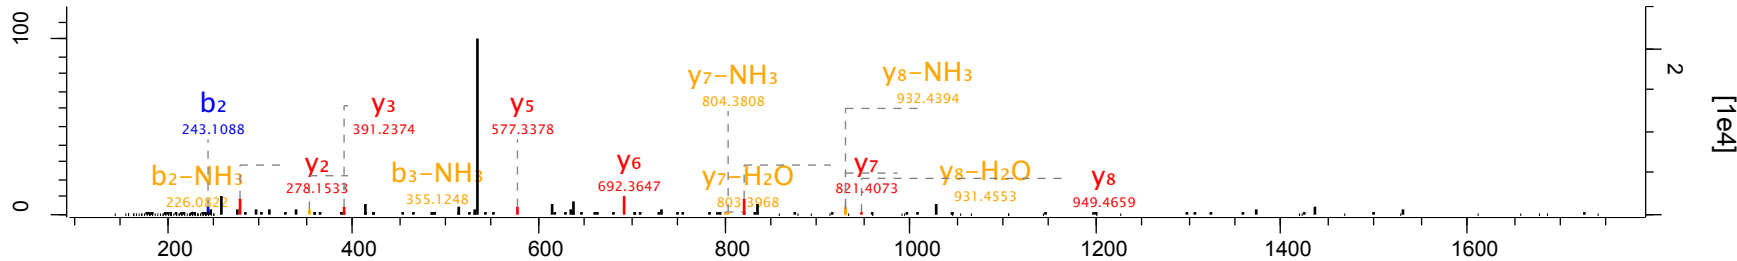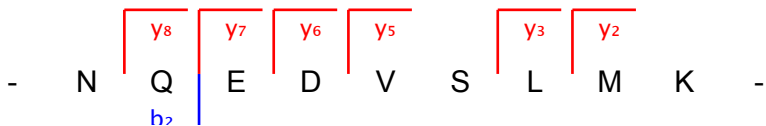

Raw file

Scan

Method

Score

m/z

Gene names

20150227\_yeast\_Top\_opt\_B1\_01\_1599

17164

TOF; CID

68.22

508.74

PHA2

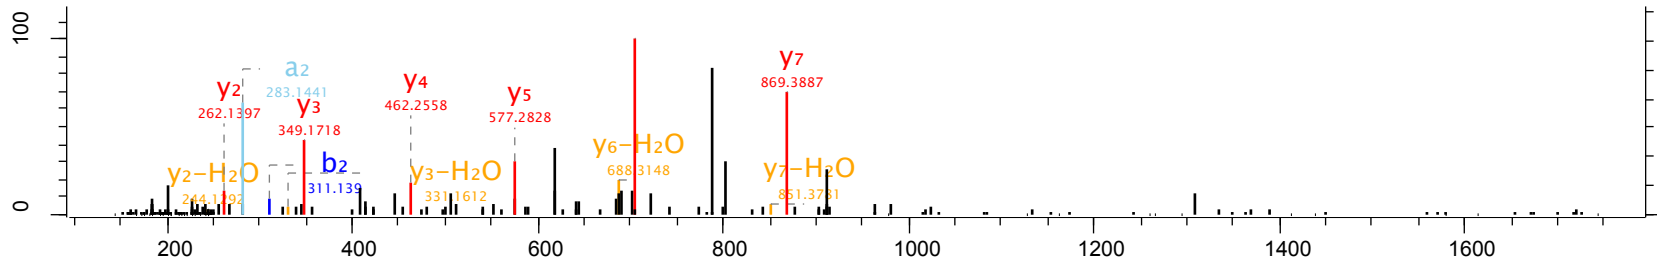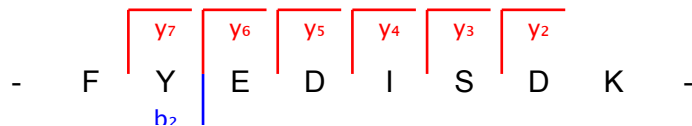

Raw file

20150227\_yeast\_Top\_opt\_B1\_01\_1599

Scan

17208

Method

TOF; CID

Score

39.01

m/z

659.84

Gene names

TCM62

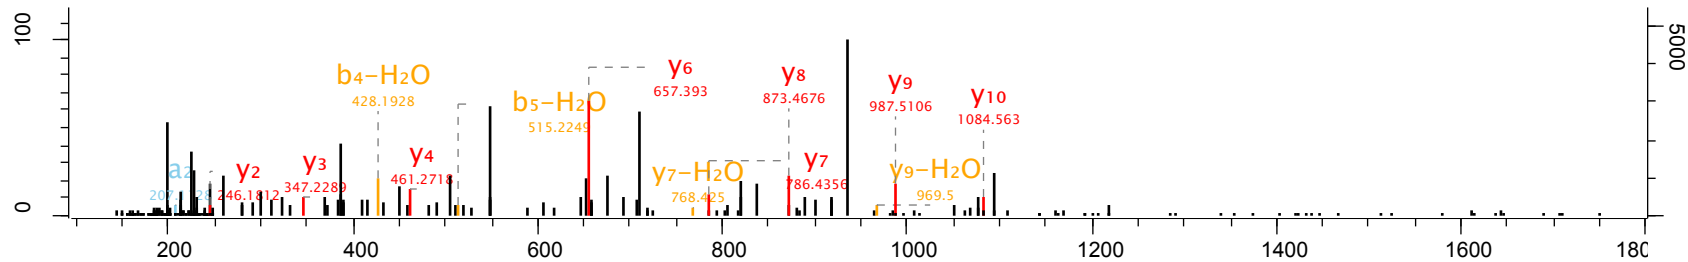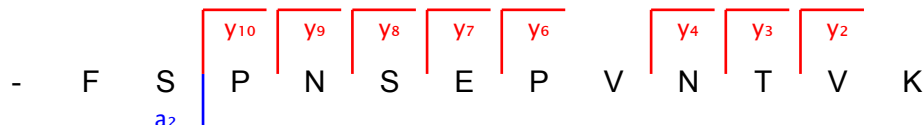



Raw file

Scan

Method

Score

m/z

Gene names

20150227\_yeast\_Top\_opt\_B1\_01\_1599

17292

TOF; CID

93.35

586.28

SSU1

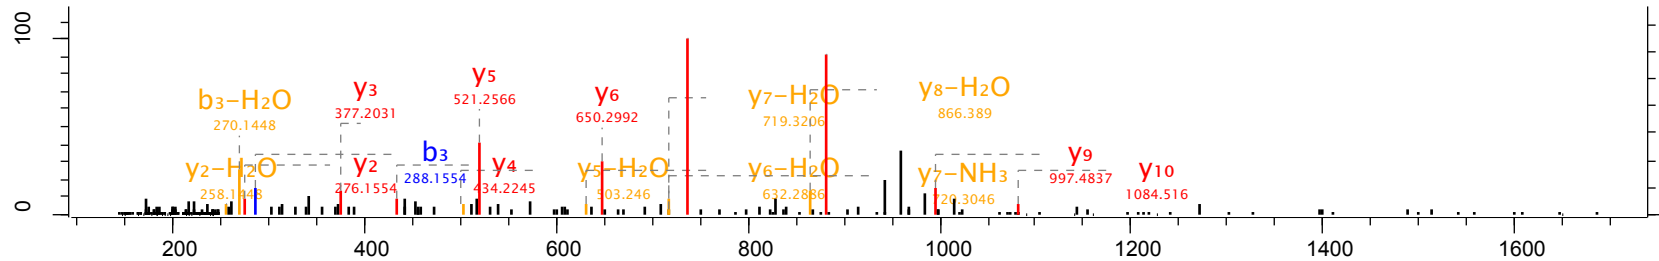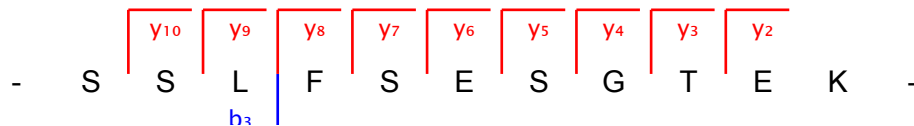

| Raw file                          | Scan  | Method   | Score | m/z    | Gene names |
|-----------------------------------|-------|----------|-------|--------|------------|
| 20150227_yeast_Top_opt_B1_01_1599 | 17646 | TOF; CID | 67.03 | 374.24 | RAD54      |

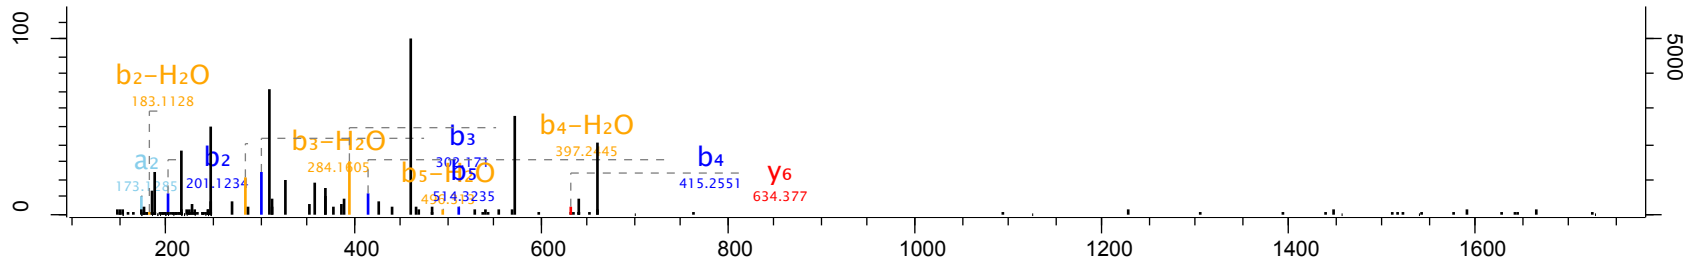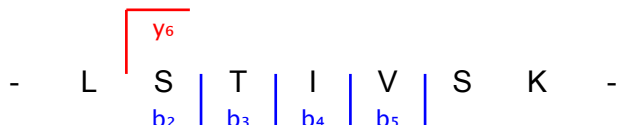

Raw file

20150227\_yeast\_Top\_opt\_B1\_01\_1599

Scan

18435

Method

TOF; CID

Score

105.4

m/z

666.29

Gene names

MRPS17

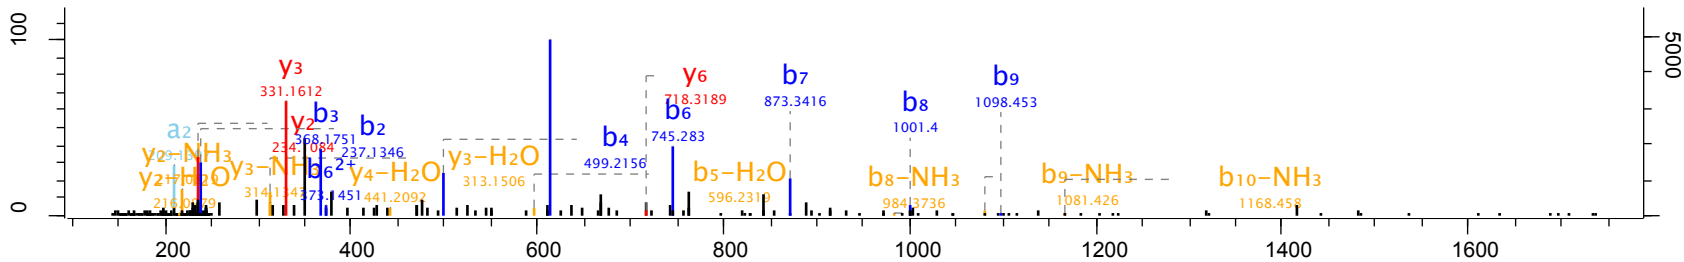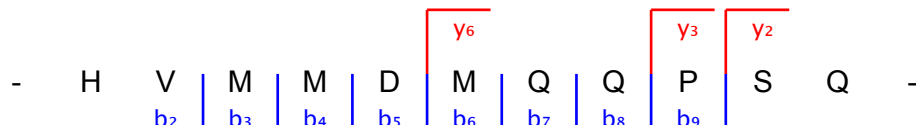

Raw file

Scan

Method

Score

m/z

Gene names

20150227\_yeast\_Top\_opt\_B1\_01\_1599

20694

TOF; CID

92.87

618.82

NGR1

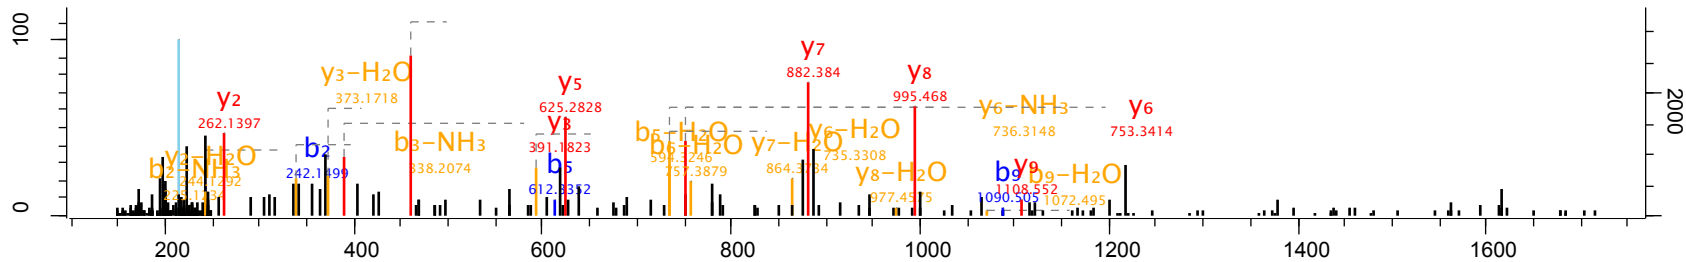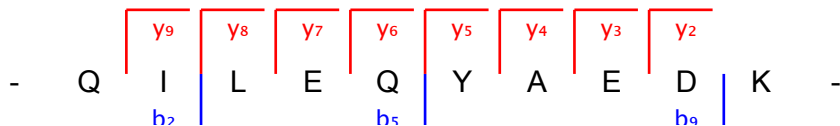

| Raw file                          | Scan  | Method   | Score | m/z    | Gene names |
|-----------------------------------|-------|----------|-------|--------|------------|
| 20150227_yeast_Top_opt_B1_01_1599 | 21328 | TOF; CID | 60.26 | 634.33 | DOA4       |

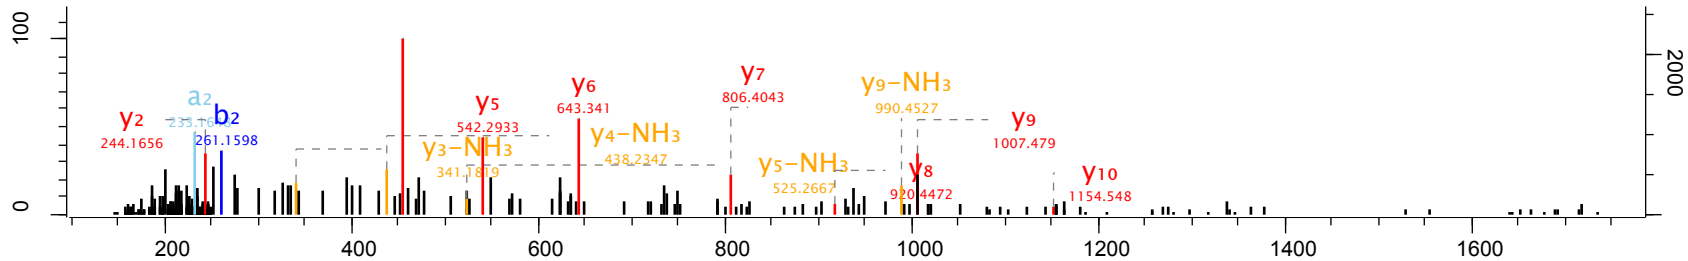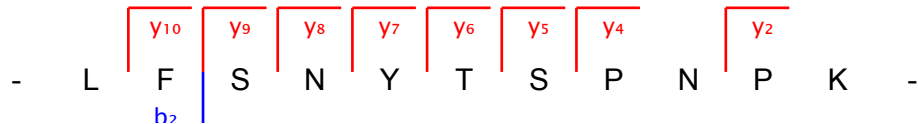

Raw file

20150227\_yeast\_Top\_opt\_B1\_01\_1599

Scan

21451

Method

TOF; CID

Score

96.67

m/z

600.31

Gene names

GLG2

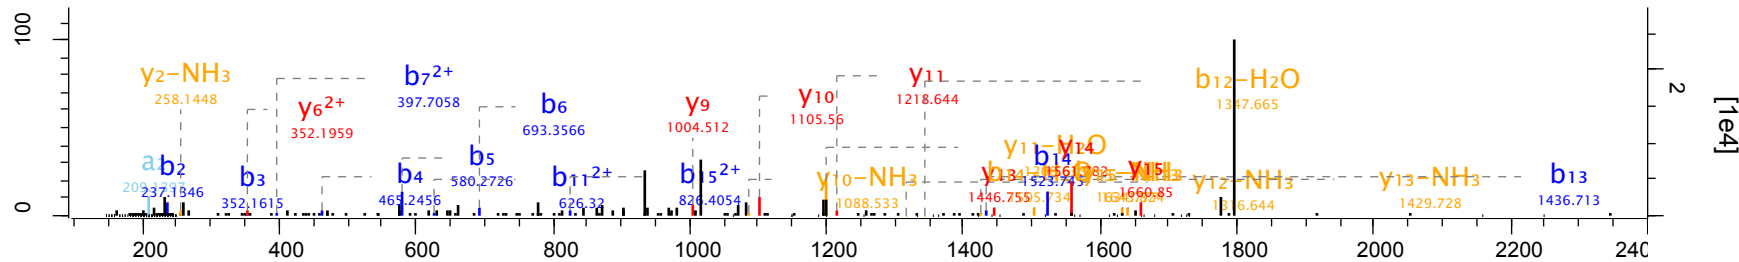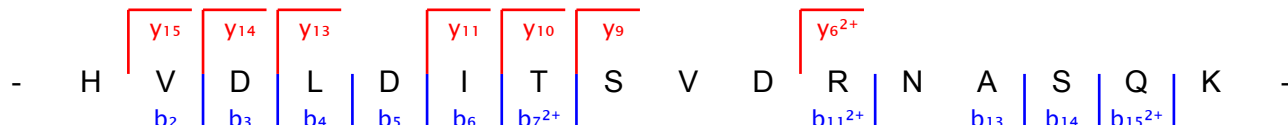

| Raw file                          | Scan  | Method   | Score | m/z    | Gene names |
|-----------------------------------|-------|----------|-------|--------|------------|
| 20150227_yeast_Top_opt_B1_01_1599 | 22227 | TOF; CID | 78.19 | 498.75 | YKL023W    |

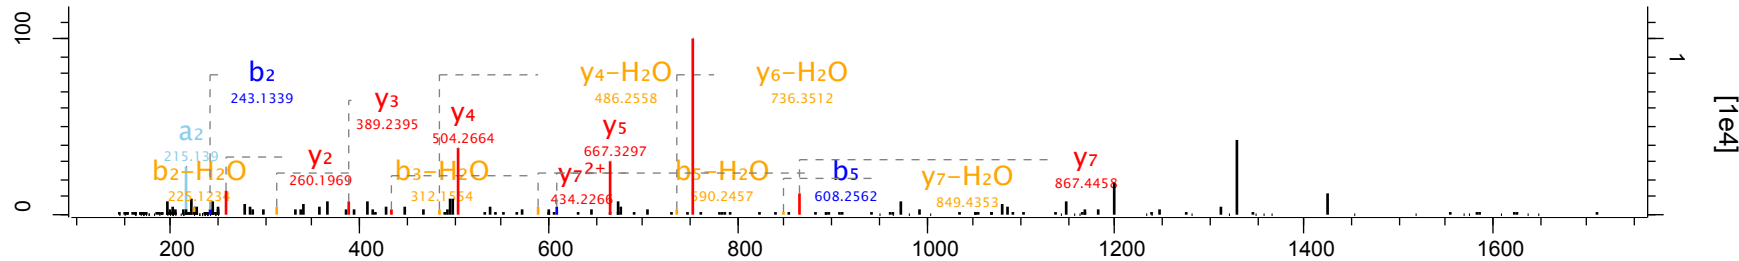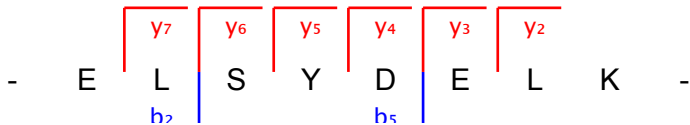

| Raw file                          | Scan  | Method   | Score | m/z   | Gene names |
|-----------------------------------|-------|----------|-------|-------|------------|
| 20150227_yeast_Top_opt_B1_01_1599 | 23216 | TOF; CID | 60.64 | 592.3 | EGT2       |

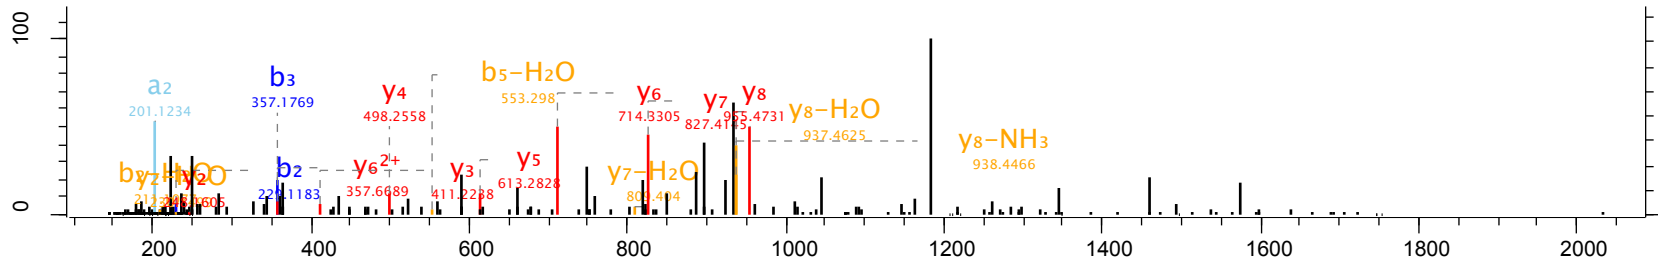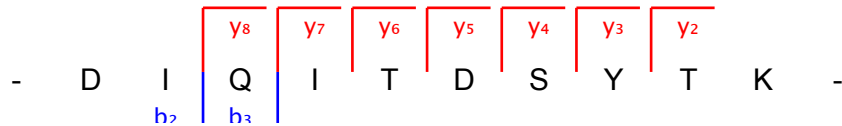



| Raw file                          | Scan  | Method   | Score | m/z    | Gene names |
|-----------------------------------|-------|----------|-------|--------|------------|
| 20150227_yeast_Top_opt_B1_01_1599 | 23346 | TOF; CID | 74.84 | 400.54 | MSN1       |

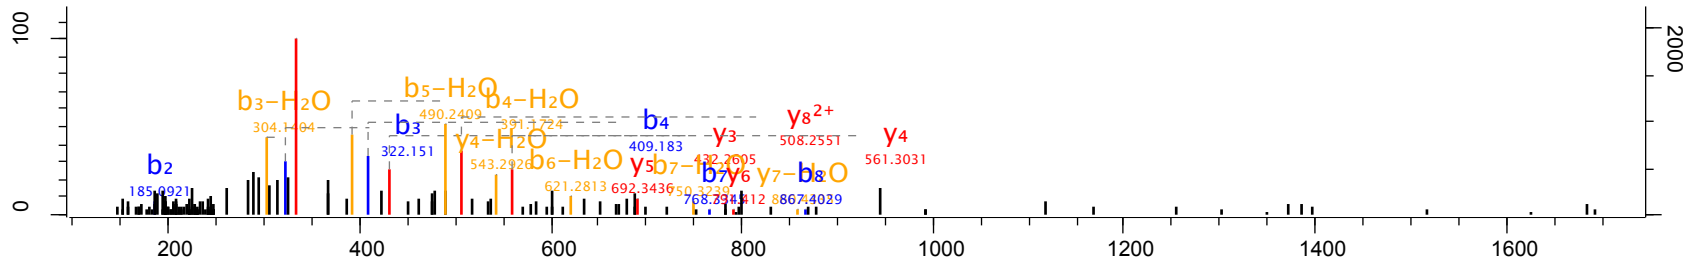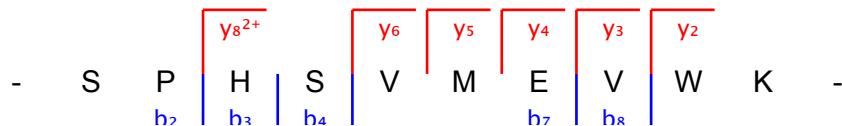

Raw file

20150227\_yeast\_Top\_opt\_B1\_01\_1599

Scan

23347

Method

TOF; CID

Score

128.08

m/z

654.85

Gene names

MSL1

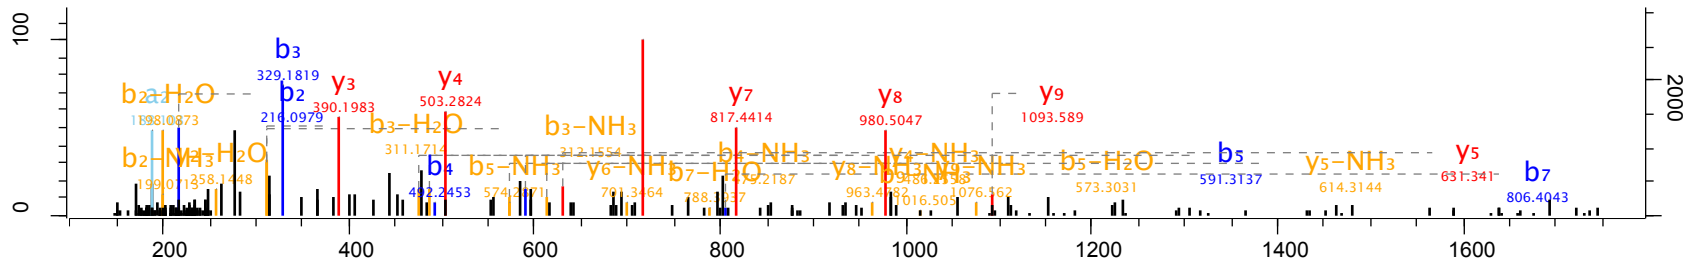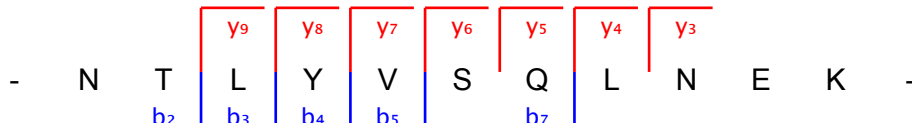

Raw file

Scan

Method

Score

m/z

Gene names

20150227\_yeast\_Top\_opt\_B1\_01\_1599

23573

TOF; CID

59.16

665.35

RDS3

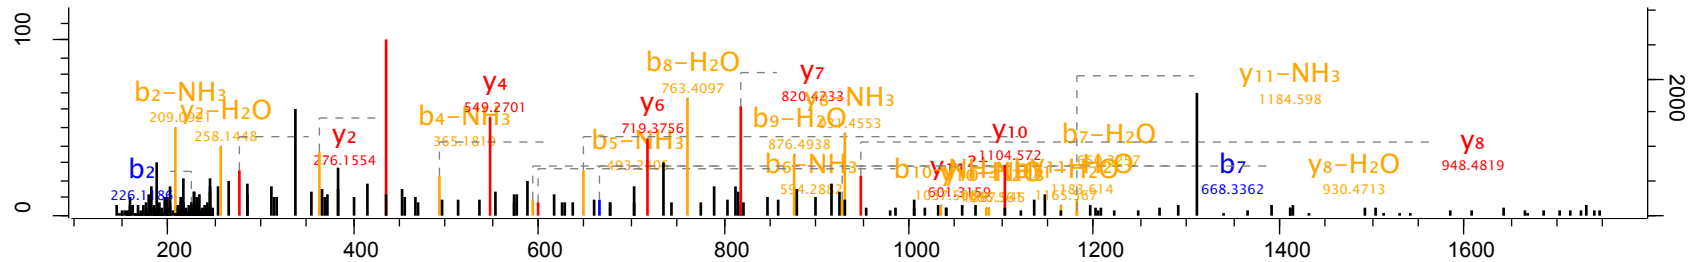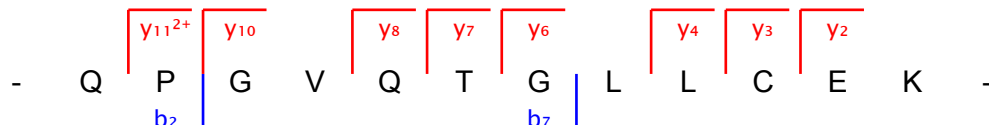

| Raw file                          | Scan  | Method   | Score | m/z    | Gene names |
|-----------------------------------|-------|----------|-------|--------|------------|
| 20150227_yeast_Top_opt_B1_01_1599 | 23908 | TOF; CID | 73.83 | 493.63 | SRB2       |

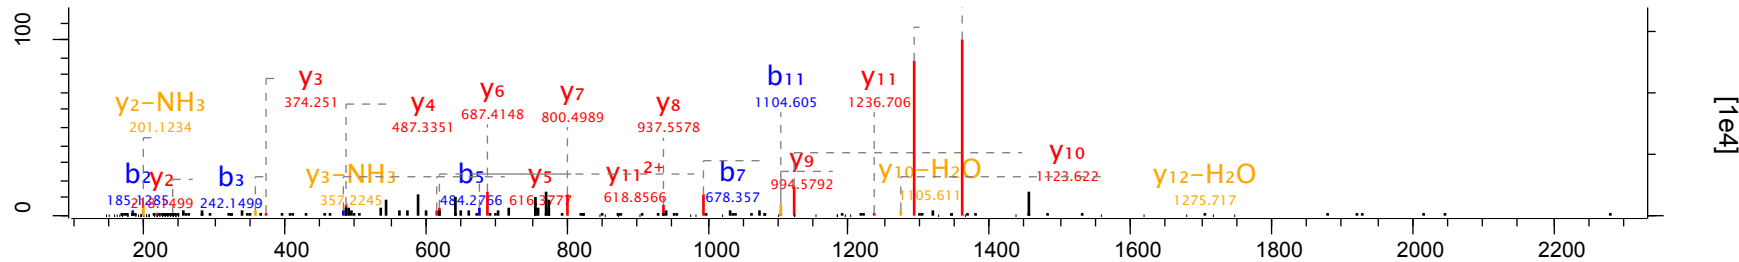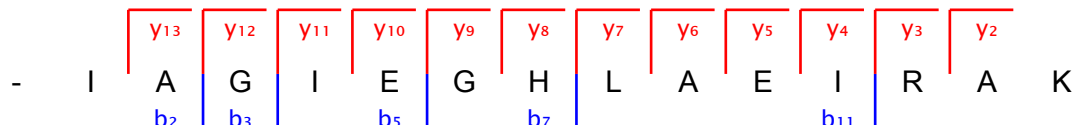

| Raw file                          | Scan  | Method   | Score | m/z    | Gene names |
|-----------------------------------|-------|----------|-------|--------|------------|
| 20150227_yeast_Top_opt_B1_01_1599 | 23930 | TOF; CID | 73.67 | 600.34 | SDH3       |

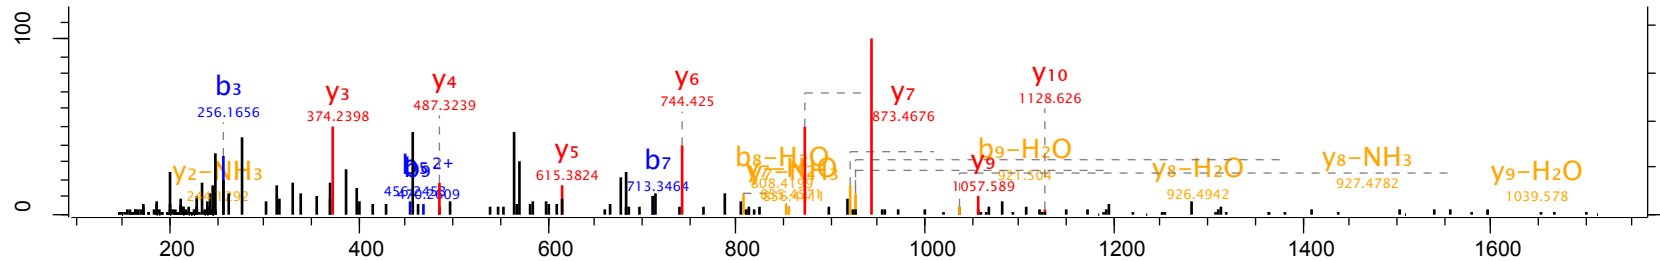

- A A I A E E Q I L N K -

┌ └ ┌ └ ┌ └ ┌ └ ┌ └ ┌ └ ┌ └

y10 y9 y8 y7 y6 y5 y4 y3

b3 b5 b7 b9<sup>2+</sup>

Raw file

20150227\_yeast\_Top\_opt\_B1\_01\_1599

Scan

24496

Method

TOF; CID

Score

83.5

m/z

516.78

Gene names

FMS1

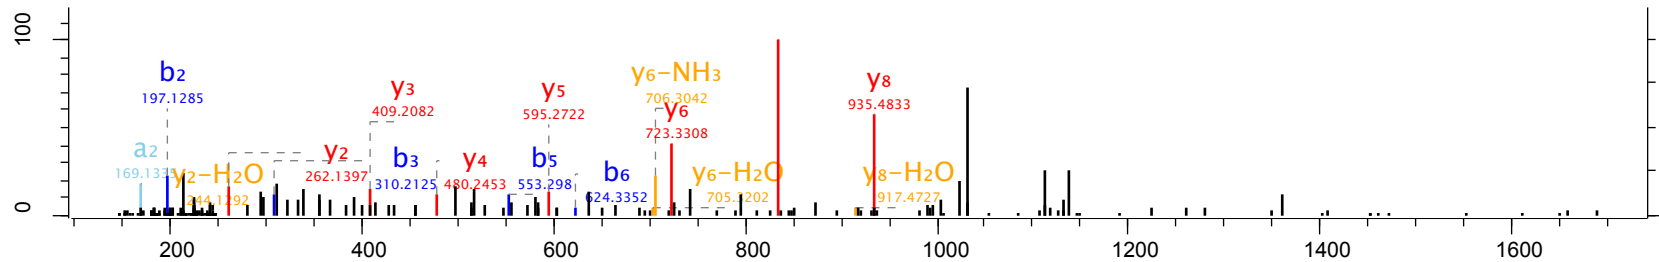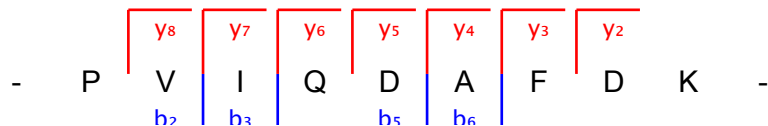

Raw file

20150227\_yeast\_Top\_opt\_B1\_01\_1599

Scan

24805

Method

TOF; CID

Score

46.41

m/z

638.33

Gene names

RNH203

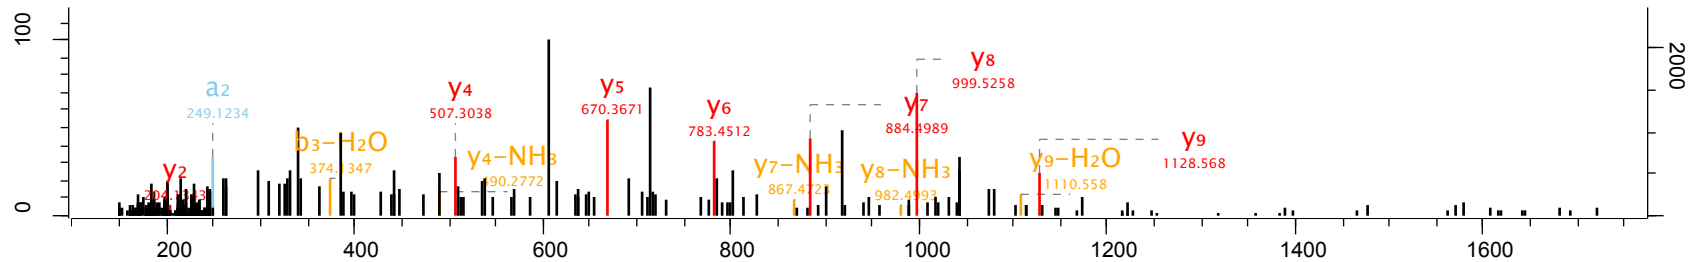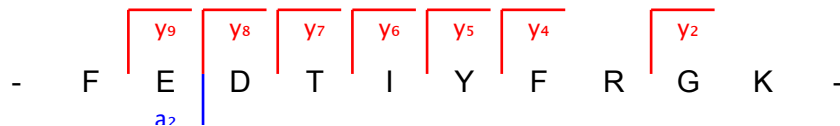

Raw file  
 20150227\_yeast\_Top\_opt\_B1\_01\_1599

| Scan  | Method   | Score | m/z    |
|-------|----------|-------|--------|
| 25070 | TOF; CID | 77.22 | 887.44 |

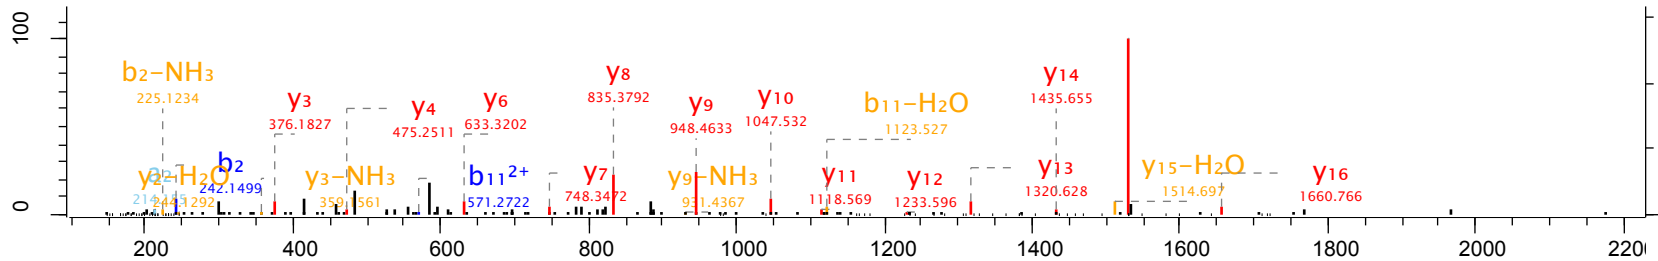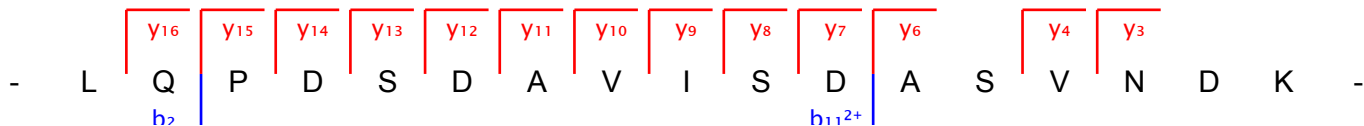



| Raw file                          | Scan  | Method   | Score | m/z    | Gene names |
|-----------------------------------|-------|----------|-------|--------|------------|
| 20150227_yeast_Top_opt_B1_01_1599 | 25380 | TOF; CID | 91.63 | 438.75 | CGR1       |

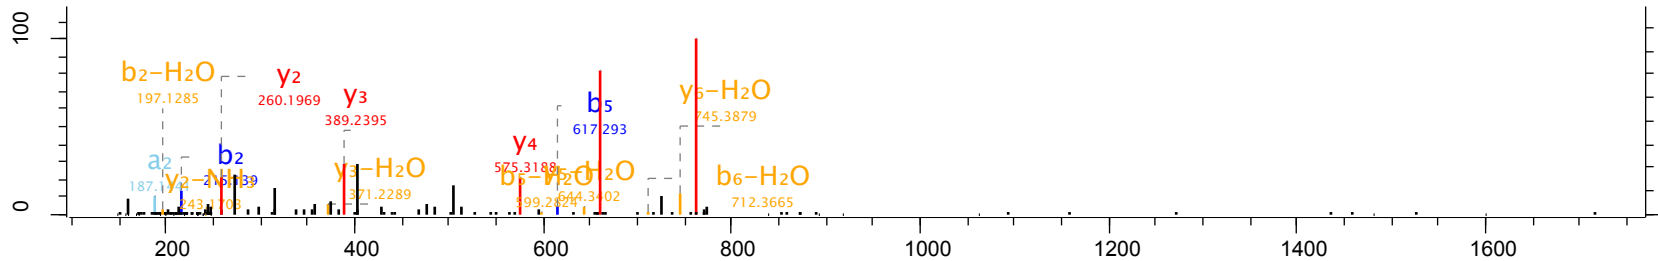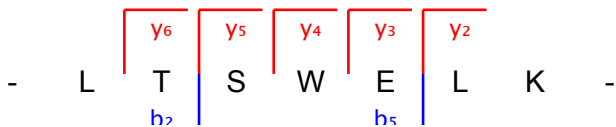

Raw file

20150227\_yeast\_Top\_opt\_B1\_01\_1599

Scan

25473

Method

TOF; CID

Score

75.32

m/z

547.6

Gene names

MON1

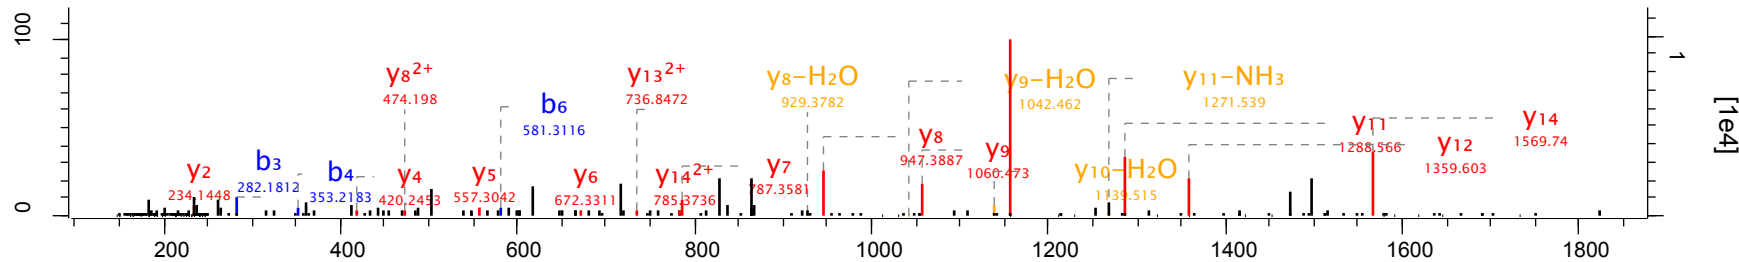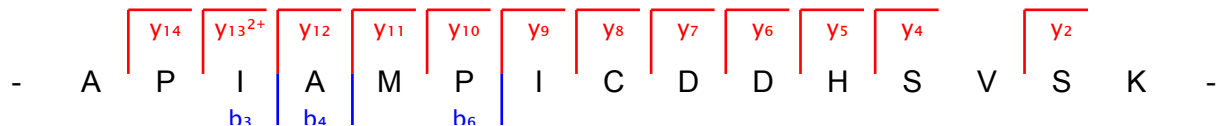

| Raw file                          | Scan  | Method   | Score | m/z    | Gene names |
|-----------------------------------|-------|----------|-------|--------|------------|
| 20150227_yeast_Top_opt_B1_01_1599 | 26100 | TOF; CID | 59.23 | 764.36 | IDS2       |

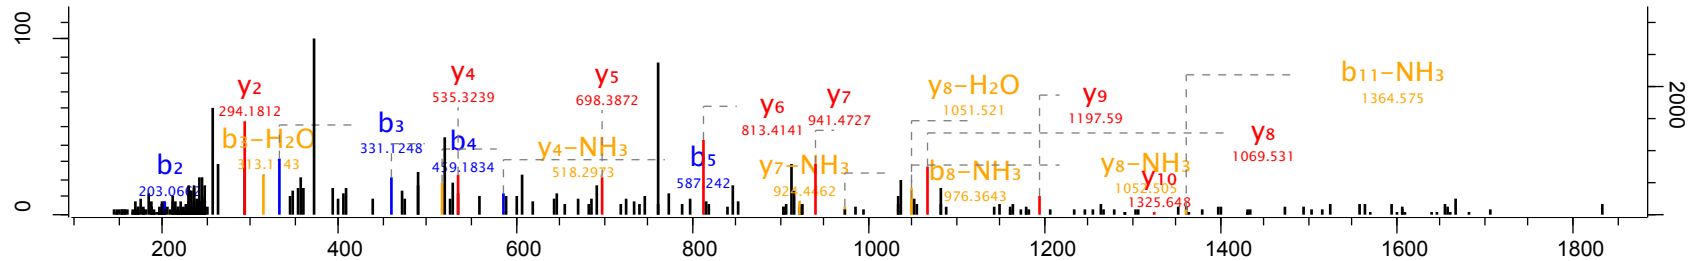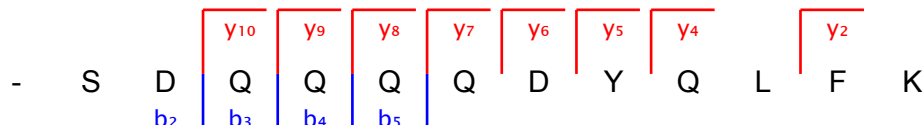

Raw file

Scan

Method

Score

m/z

20150227\_yeast\_Top\_opt\_B1\_01\_1599

26408

TOF; CID

98.94

803.4

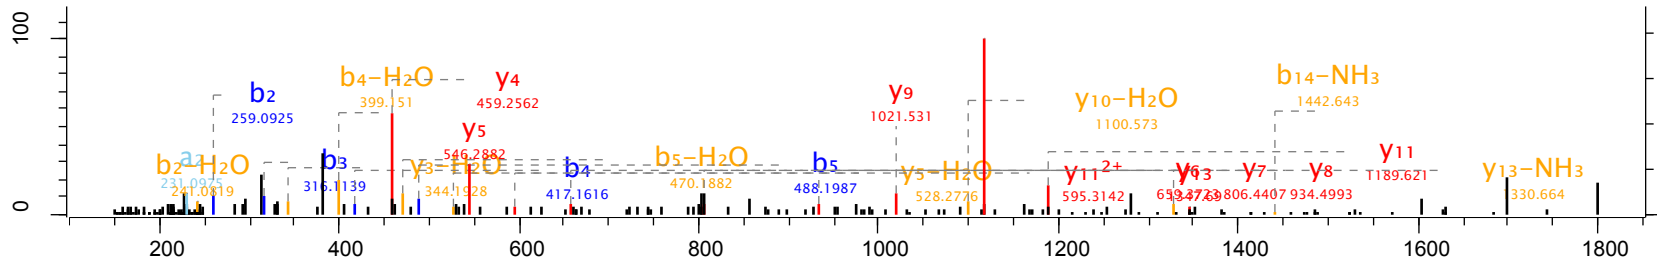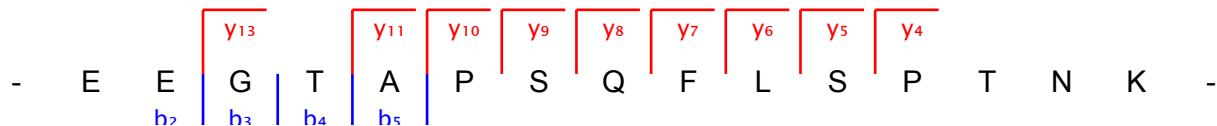

| Raw file                          | Scan  | Method   | Score | m/z    | Gene names |
|-----------------------------------|-------|----------|-------|--------|------------|
| 20150227_yeast_Top_opt_B1_01_1599 | 27274 | TOF; CID | 56.55 | 567.32 | AVT1       |

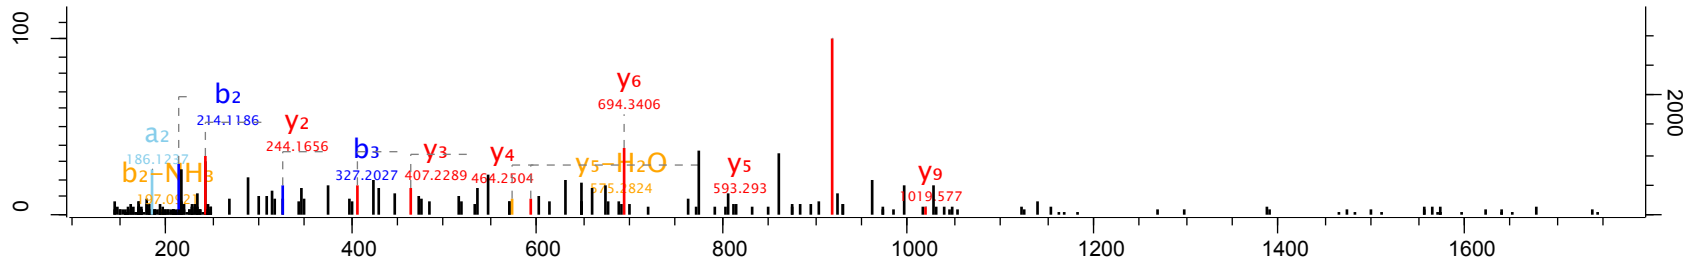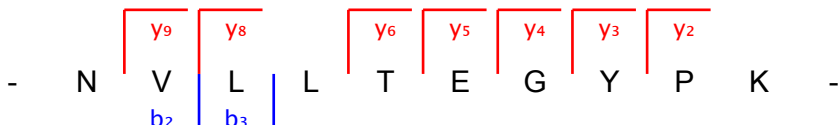

Raw file

Scan

Method

Score

m/z

Gene names

20150227\_yeast\_Top\_opt\_B1\_01\_1599

28065

TOF; CID

91.32

883.43

EAR1

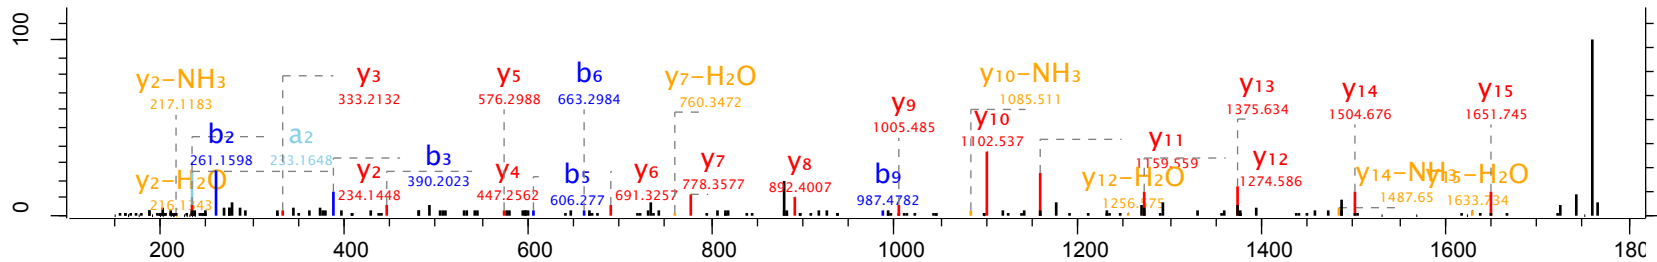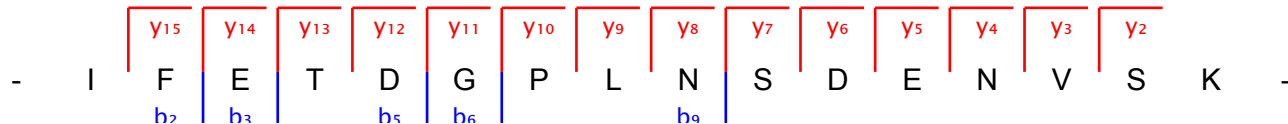

Raw file

Scan

Method

Score

m/z

Gene names

20150227\_yeast\_Top\_opt\_B1\_01\_1599

28093

TOF; CID

62.52

600.3

THP3

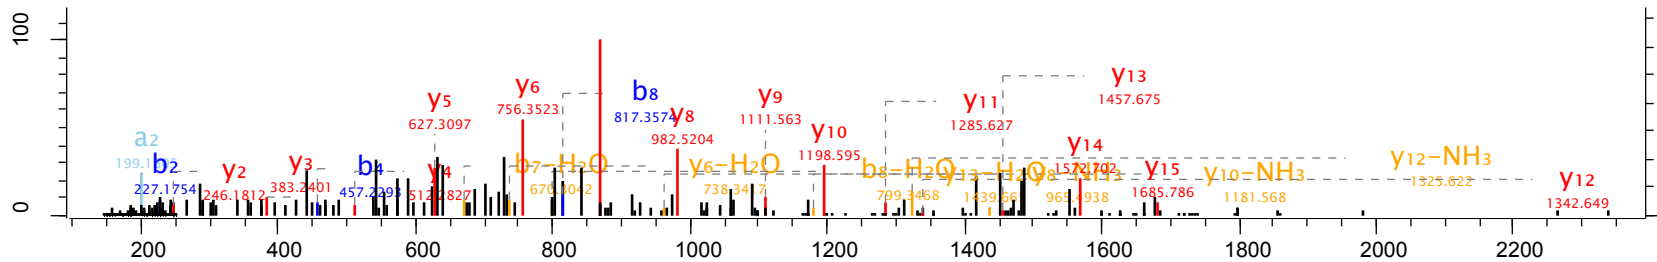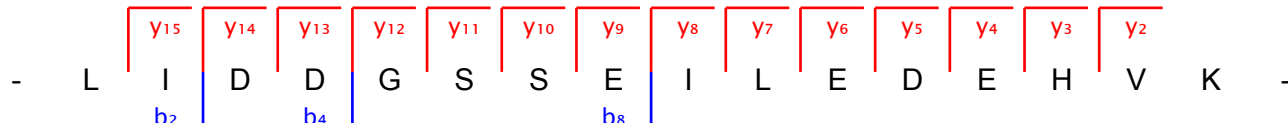

Raw file

20150227\_yeast\_Top\_opt\_B1\_01\_1599

Scan

28262

Method

TOF; CID

Score

46.35

m/z

616.33

Gene names

VBA1

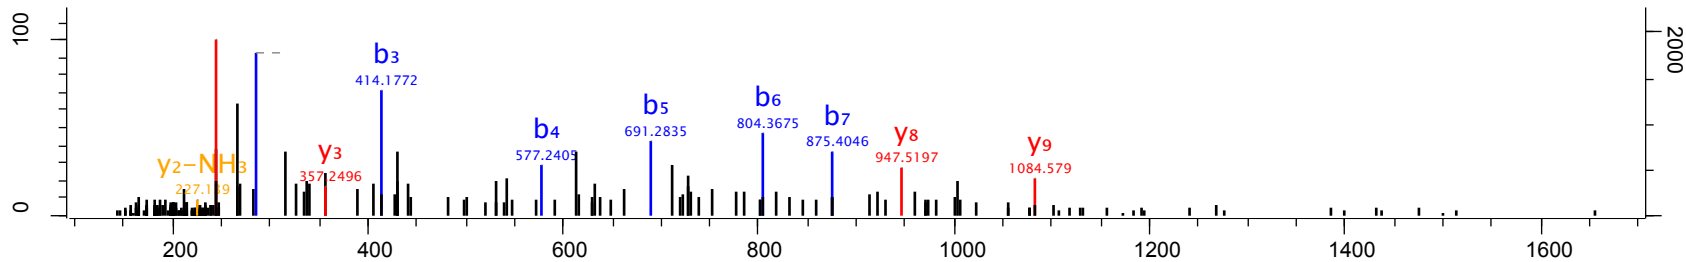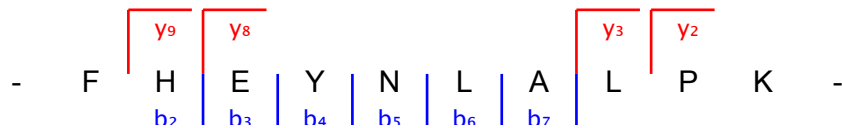



Raw file

20150227\_yeast\_Top\_opt\_B1\_01\_1599

Scan

28600

Method

TOF; CID

Score

50.78

m/z

767.37

Gene names

AKR2

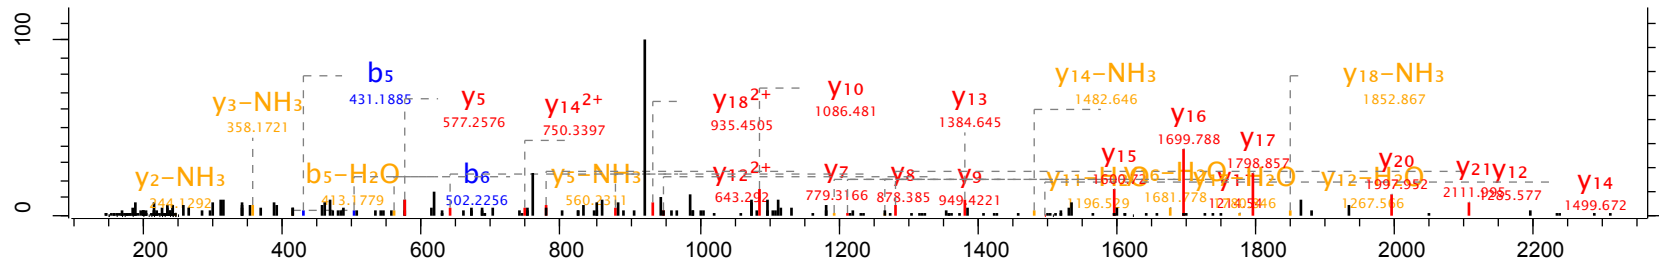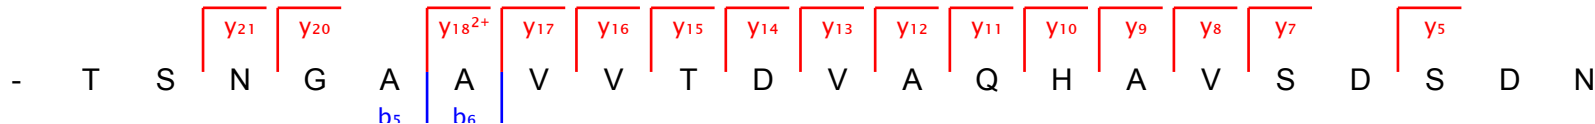

| Raw file                          | Scan  | Method   | Score | m/z    | Gene names |
|-----------------------------------|-------|----------|-------|--------|------------|
| 20150227_yeast_Top_opt_B1_01_1599 | 28662 | TOF; CID | 81.57 | 617.83 | SNC2       |

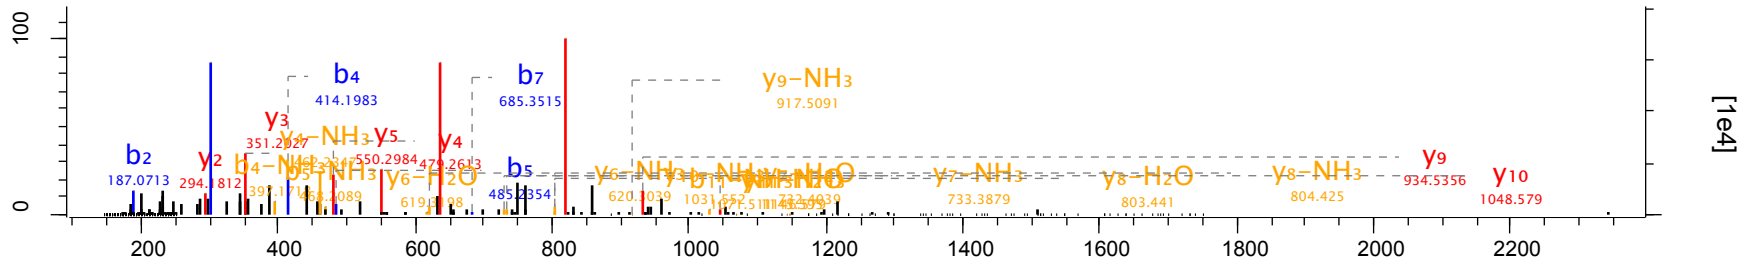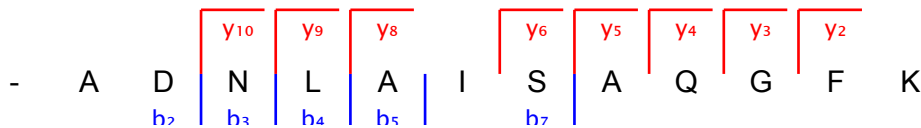

Raw file

20150227\_yeast\_Top\_opt\_B1\_01\_1599

Scan

28764

Method

TOF; CID

Score

39.88

m/z

659.33

Gene names

YPK9

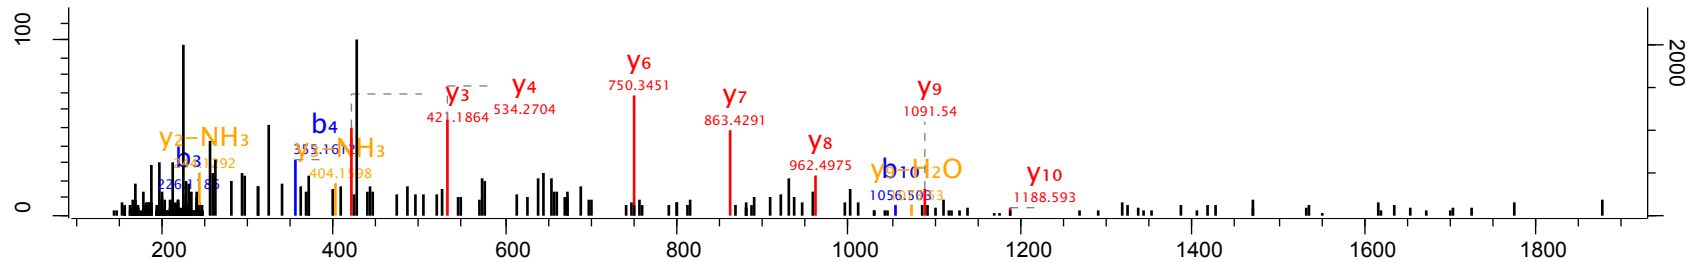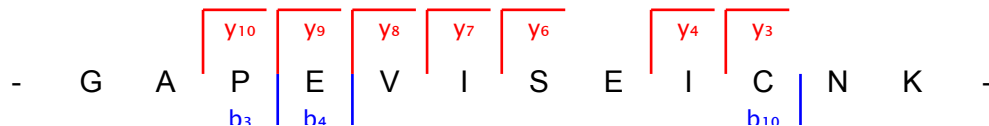

| Raw file                          | Scan  | Method   | Score | m/z    | Gene names |
|-----------------------------------|-------|----------|-------|--------|------------|
| 20150227_yeast_Top_opt_B1_01_1599 | 29140 | TOF; CID | 83.54 | 856.46 | NBL1       |

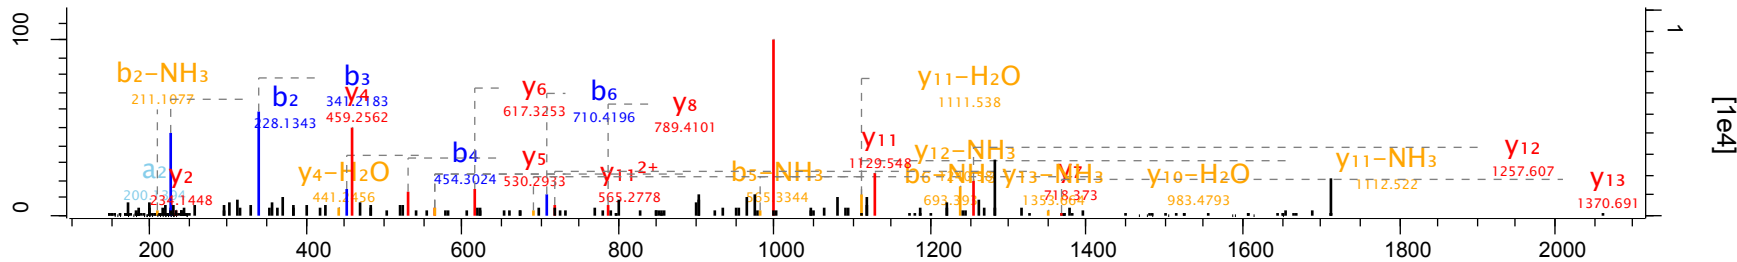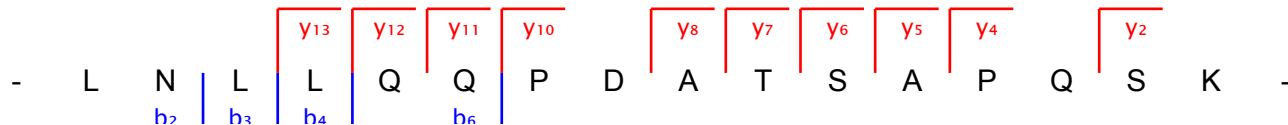

Raw file

20150227\_yeast\_Top\_opt\_B1\_01\_1599

Scan

29574

Method

TOF; CID

Score

54.17

m/z

1010.97

Gene names

ECM22

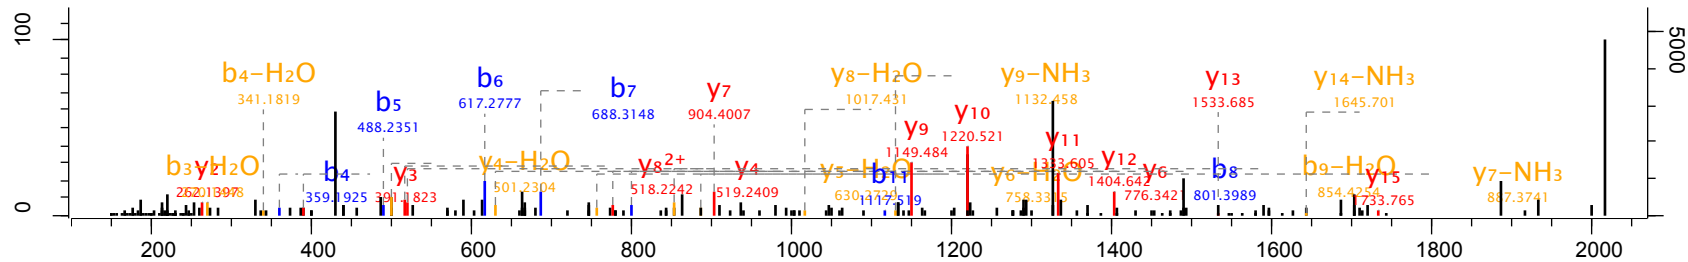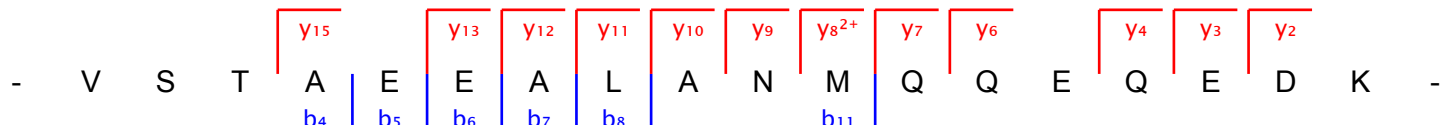

| Raw file                          | Scan  | Method   | Score | m/z    | Gene names |
|-----------------------------------|-------|----------|-------|--------|------------|
| 20150227_yeast_Top_opt_B1_01_1599 | 29808 | TOF; CID | 47.71 | 640.32 | OAF1       |

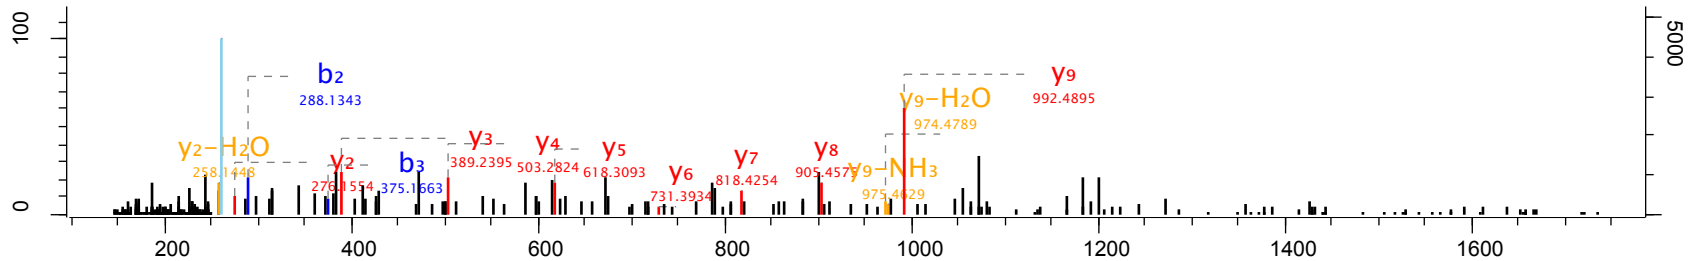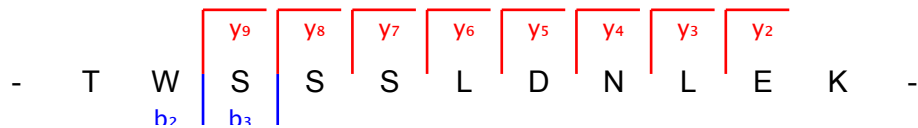

Raw file

20150227\_yeast\_Top\_opt\_B1\_01\_1599

Scan

Method

Score

m/z

Gene names

29857

TOF; CID

54.98

449.3

MRPL10

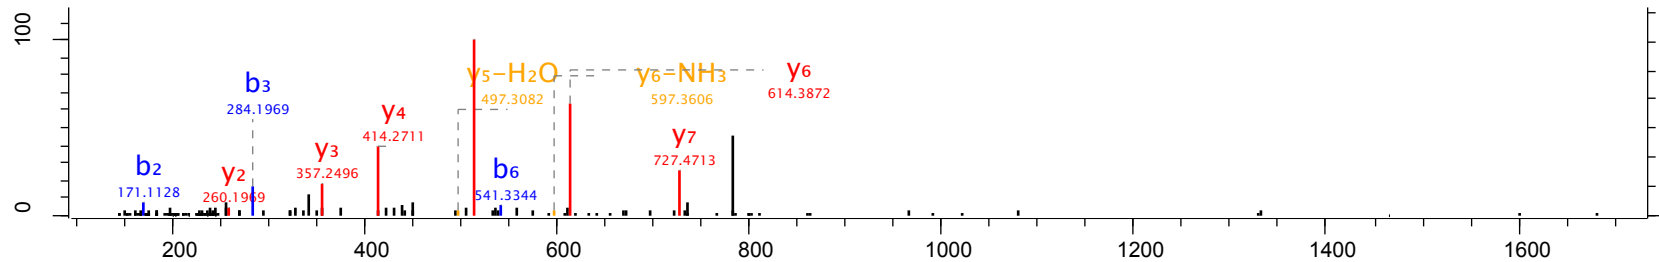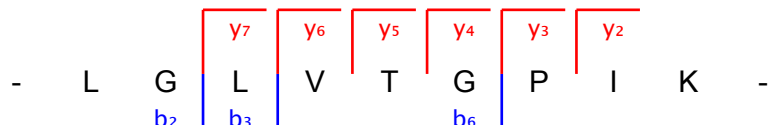

Raw file

Scan

Method

Score

m/z

Gene names

20150227\_yeast\_Top\_opt\_B1\_01\_1599

29954

TOF; CID

52.53

731.89

IRE1

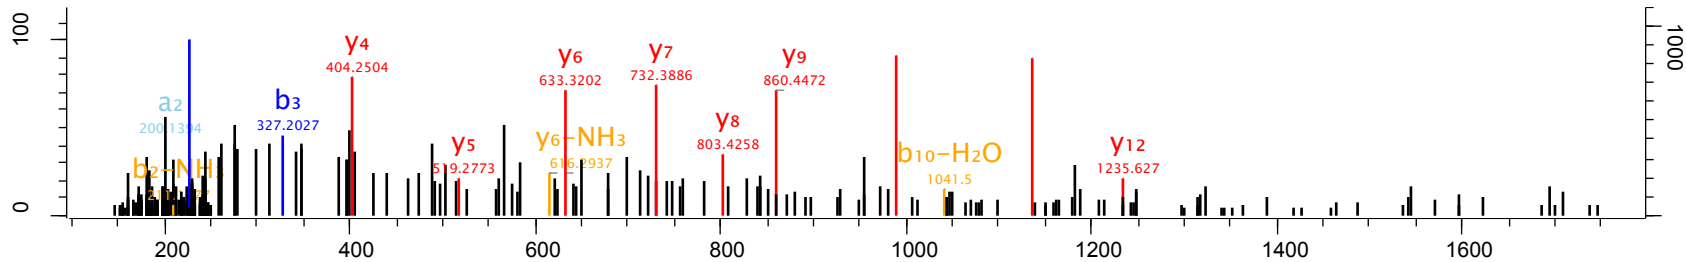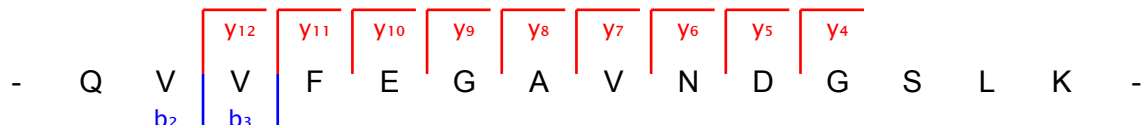



| Raw file                          | Scan  | Method   | Score  | m/z    | Gene names |
|-----------------------------------|-------|----------|--------|--------|------------|
| 20150227_yeast_Top_opt_B1_01_1599 | 30085 | TOF; CID | 148.18 | 623.33 | MOT3       |

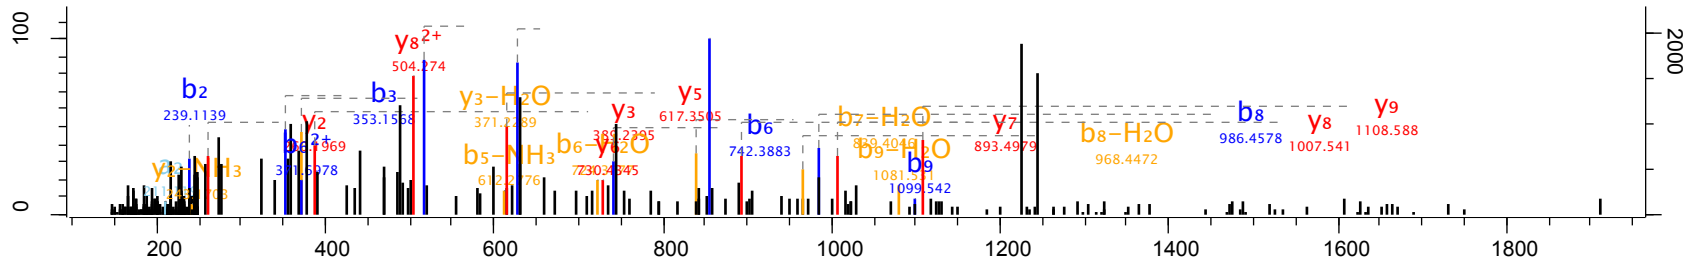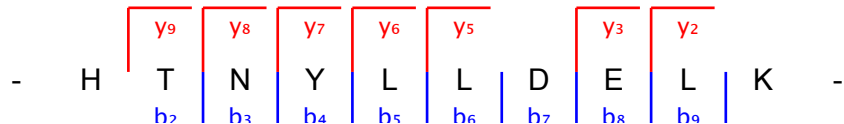

| Raw file                          | Scan  | Method   | Score | m/z    | Gene names |
|-----------------------------------|-------|----------|-------|--------|------------|
| 20150227_yeast_Top_opt_B1_01_1599 | 30927 | TOF; CID | 47.06 | 620.78 | RNY1       |

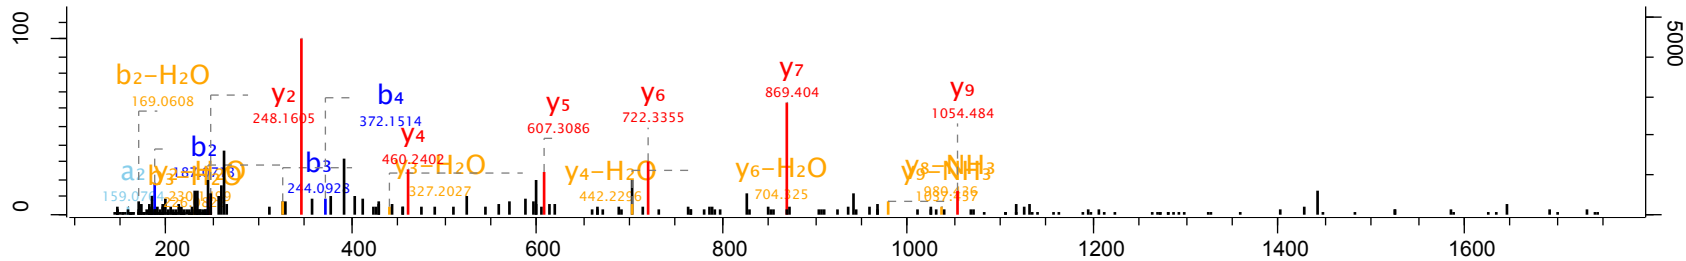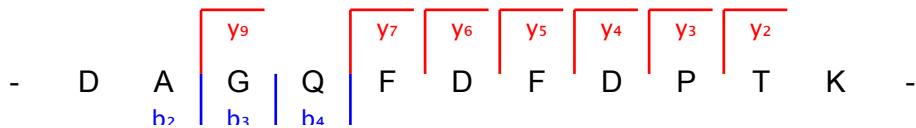

| Raw file                          | Scan  | Method   | Score | m/z    | Gene names |
|-----------------------------------|-------|----------|-------|--------|------------|
| 20150227_yeast_Top_opt_B1_01_1599 | 31835 | TOF; CID | 49.93 | 664.83 | AST2       |

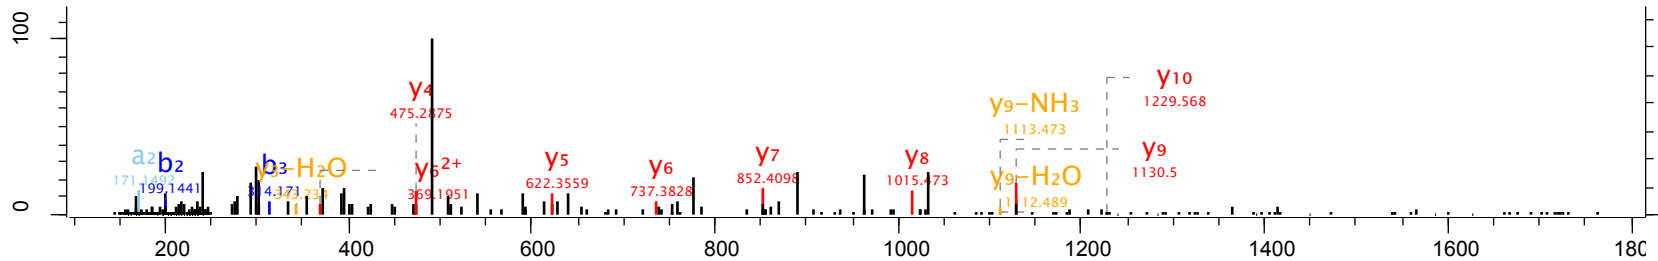

- V V D Y D D F N T L K -

┌ y10 └
┌ y9 └
┌ y8 └
┌ y7 └
┌ y6 └
┌ y5 └
┌ y4 └

└ b2 └
└ b3 └

| Raw file                          | Scan  | Method   | Score | m/z    | Gene names |
|-----------------------------------|-------|----------|-------|--------|------------|
| 20150227_yeast_Top_opt_B1_01_1599 | 32241 | TOF; CID | 55.26 | 752.36 | BRR1       |

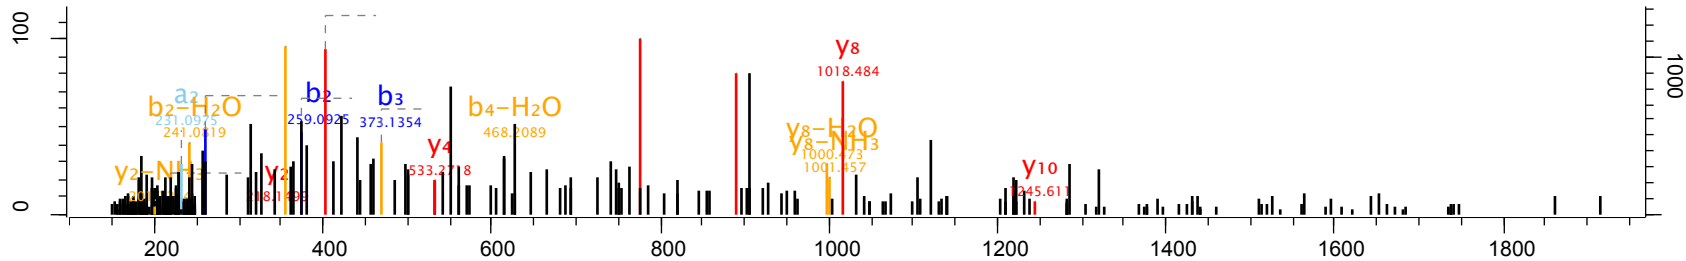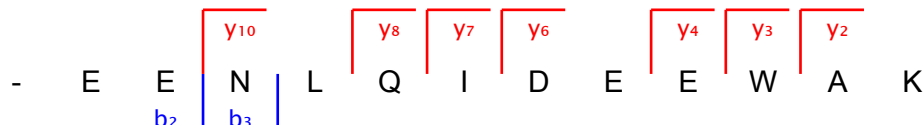

Raw file

Scan

Method

Score

m/z

Gene names

20150227\_yeast\_Top\_opt\_B1\_01\_1599

32289

TOF; CID

47.19

579.33

DAL3

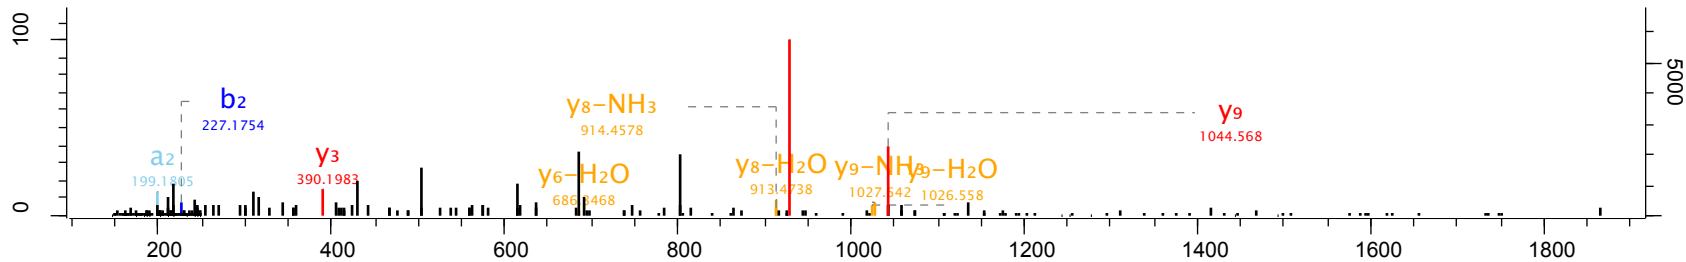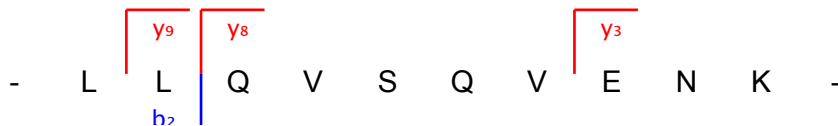

| Raw file                          | Scan  | Method   | Score  | m/z    | Gene names |
|-----------------------------------|-------|----------|--------|--------|------------|
| 20150227_yeast_Top_opt_B1_01_1599 | 32433 | TOF; CID | 104.42 | 400.88 | KSH1       |

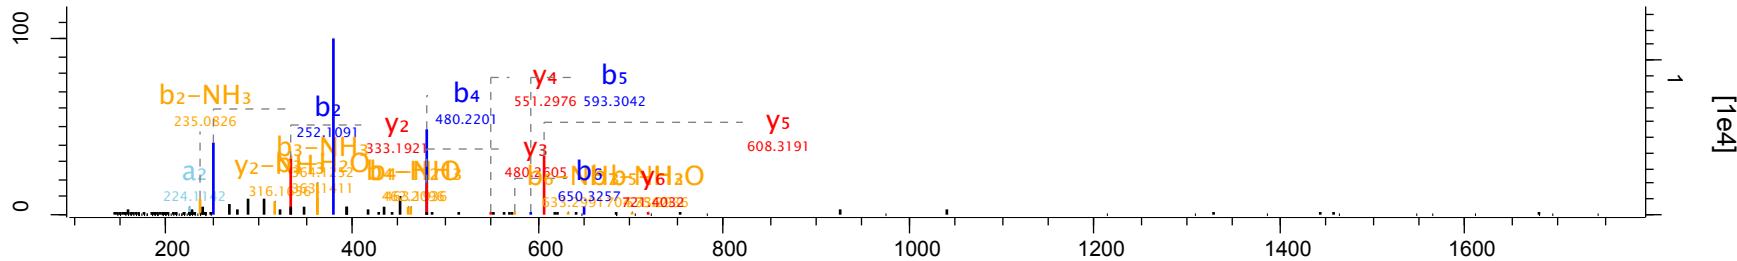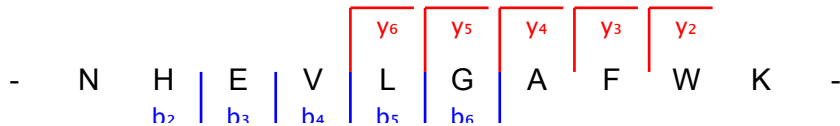

Raw file

20150227\_yeast\_Top\_opt\_B1\_01\_1599

Scan

32754

Method

TOF; CID

Score

82.43

m/z

471.74

Gene names

ELO1

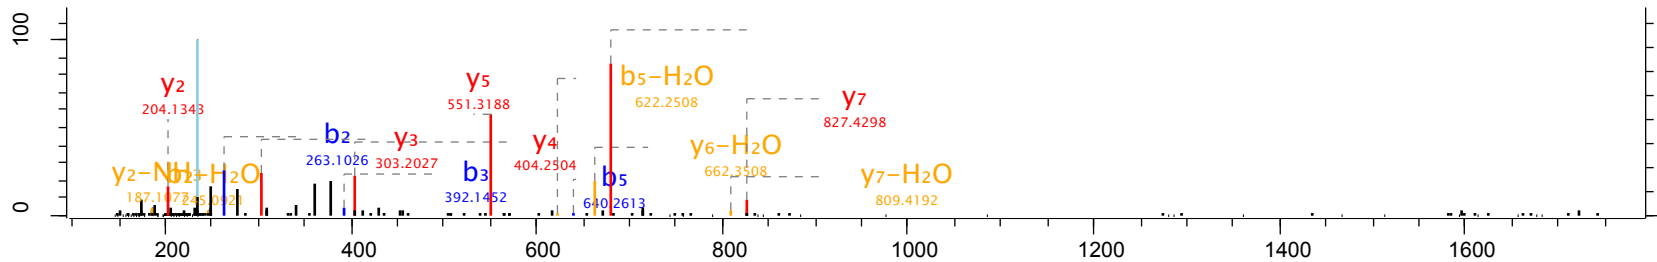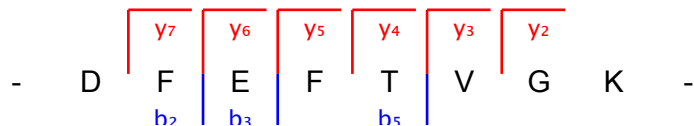

| Raw file                          | Scan  | Method   | Score | m/z    | Gene names |
|-----------------------------------|-------|----------|-------|--------|------------|
| 20150227_yeast_Top_opt_B1_01_1599 | 33399 | TOF; CID | 70.06 | 602.34 | NAS2       |

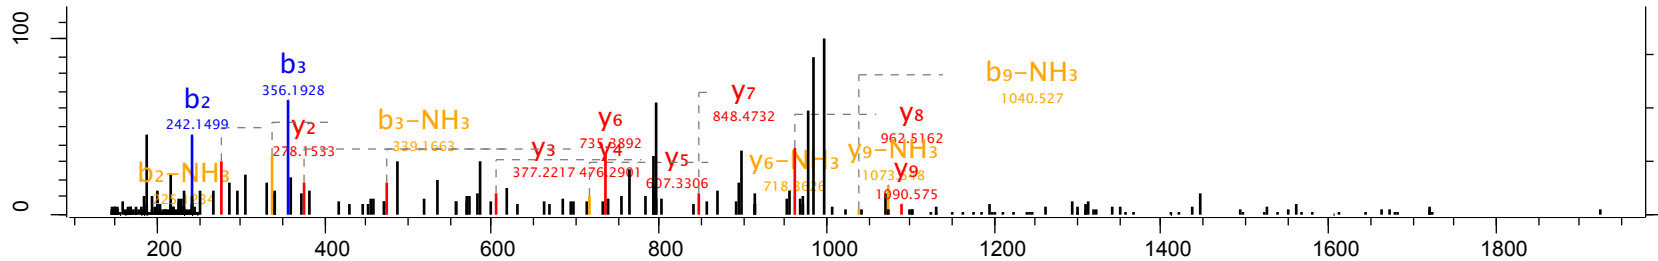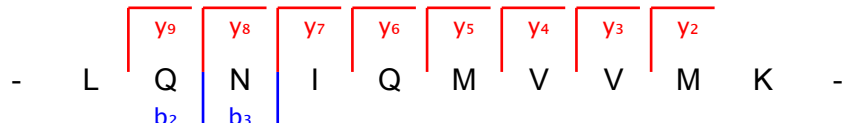



Raw file

Scan

Method

Score

m/z

Gene names

20150227\_yeast\_Top\_opt\_B1\_01\_1599

33400

TOF; CID

105.65

477.27

ERV15

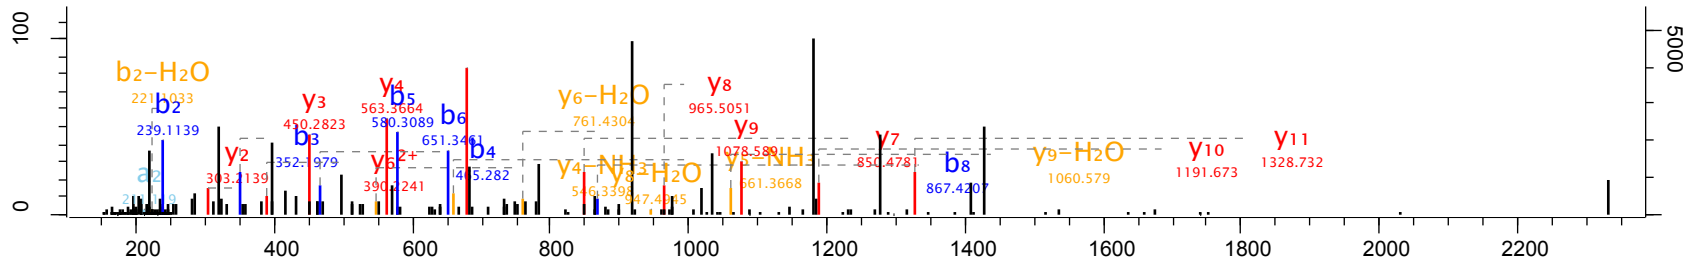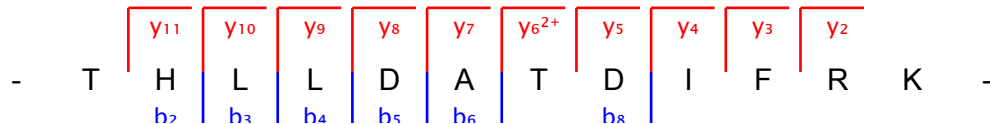

Raw file

Scan

Method

Score

m/z

Gene names

20150227\_yeast\_Top\_opt\_B1\_01\_1599

33820

TOF; CID

62.63

400.56

YHR162W;FMP43

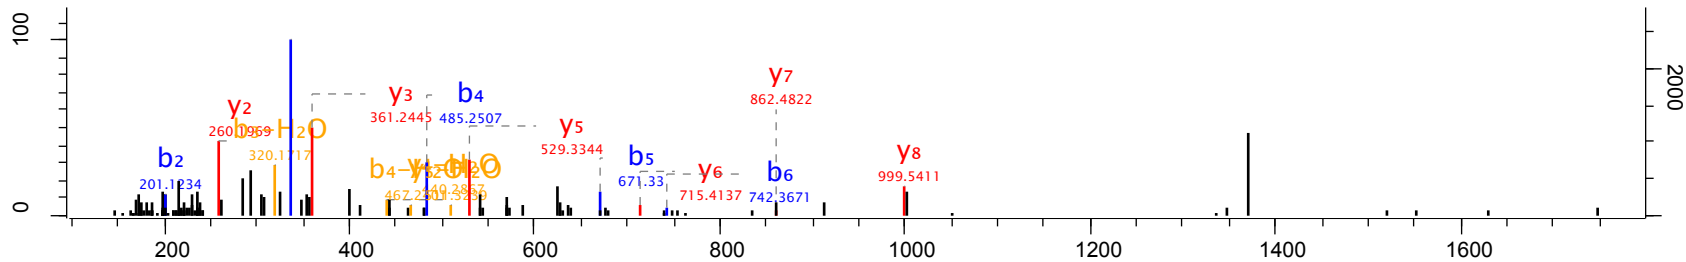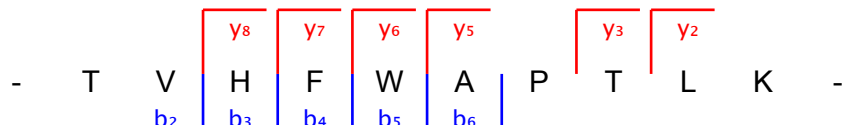

| Raw file                          | Scan  | Method   | Score | m/z    | Gene names |
|-----------------------------------|-------|----------|-------|--------|------------|
| 20150227_yeast_Top_opt_B1_01_1599 | 34343 | TOF; CID | 69.11 | 623.31 | YPL162C    |

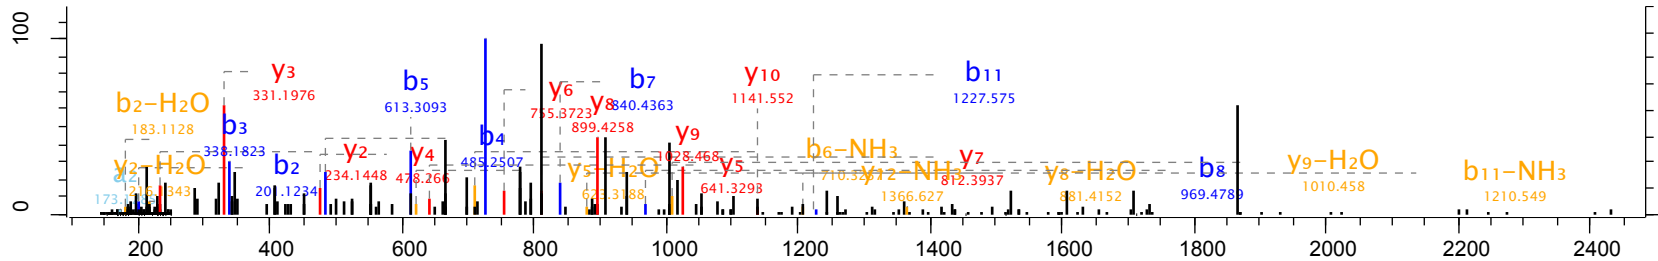

- S L H F Q N I E S G N Y F P S K -  
       b<sub>2</sub> | b<sub>3</sub> | b<sub>4</sub> | b<sub>5</sub> | b<sub>6</sub> | b<sub>7</sub> | b<sub>8</sub> | b<sub>11</sub>  
                                           y<sub>10</sub> | y<sub>9</sub> | y<sub>8</sub> | y<sub>7</sub> | y<sub>6</sub> | y<sub>5</sub> | y<sub>4</sub> | y<sub>3</sub> | y<sub>2</sub>

| Raw file                          | Scan  | Method   | Score | m/z    | Gene names |
|-----------------------------------|-------|----------|-------|--------|------------|
| 20150227_yeast_Top_opt_B1_01_1599 | 34440 | TOF; CID | 40.73 | 628.87 | RDS1       |

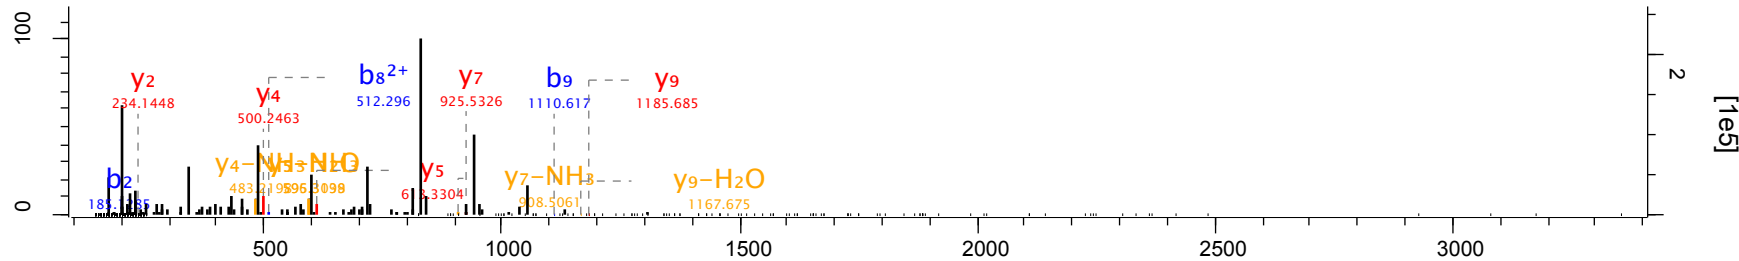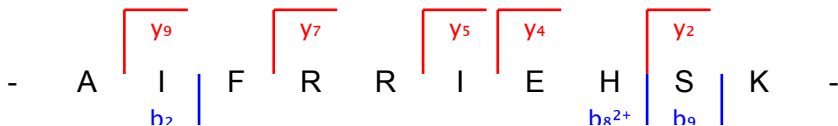

Raw file

20150227\_yeast\_Top\_opt\_B1\_01\_1599

Scan

34471

Method

TOF; CID

Score

121.44

m/z

973.03

Gene names

RFA3

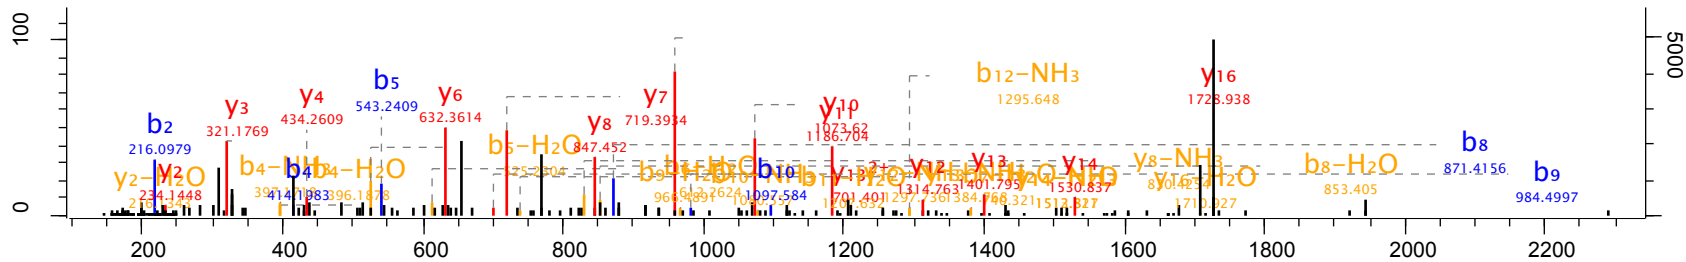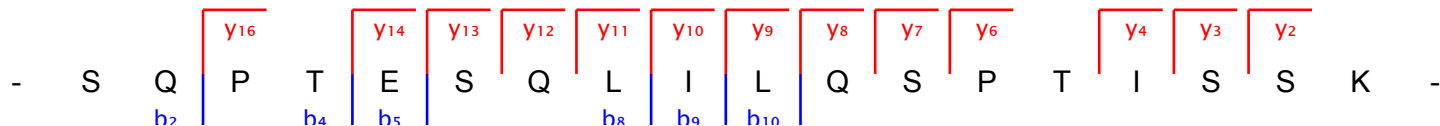

Raw file

20150227\_yeast\_Top\_opt\_B1\_01\_1599

Scan

34490

Method

TOF; CID

Score

37.85

m/z

554.52

Gene names

RGI1

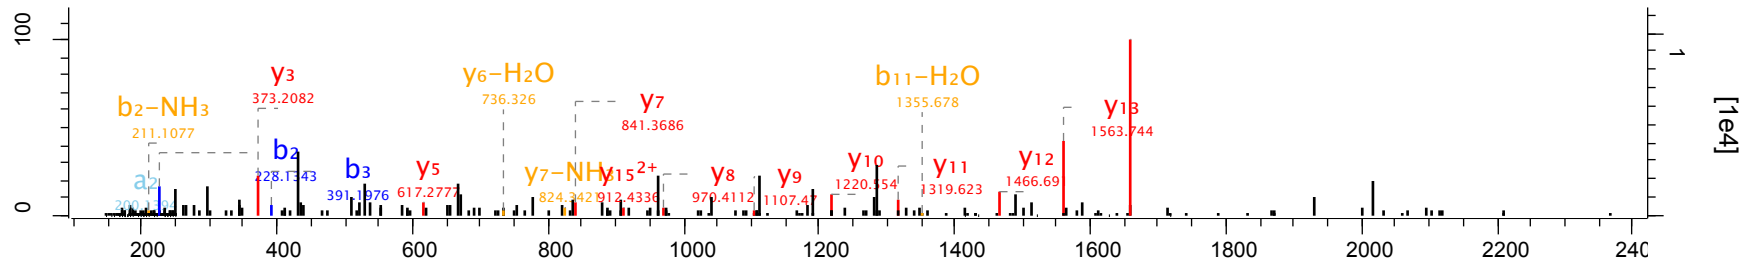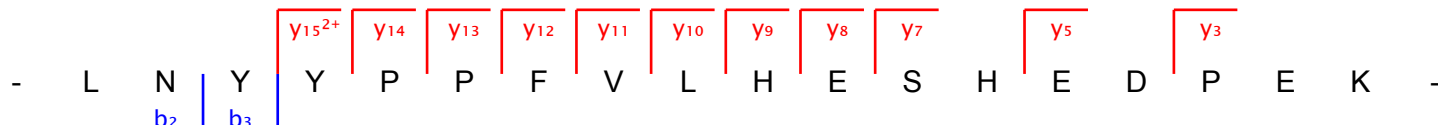

Raw file

20150227\_yeast\_Top\_opt\_B1\_01\_1599

Scan

34585

Method

TOF; CID

Score

73.26

m/z

512.78

Gene names

URE2

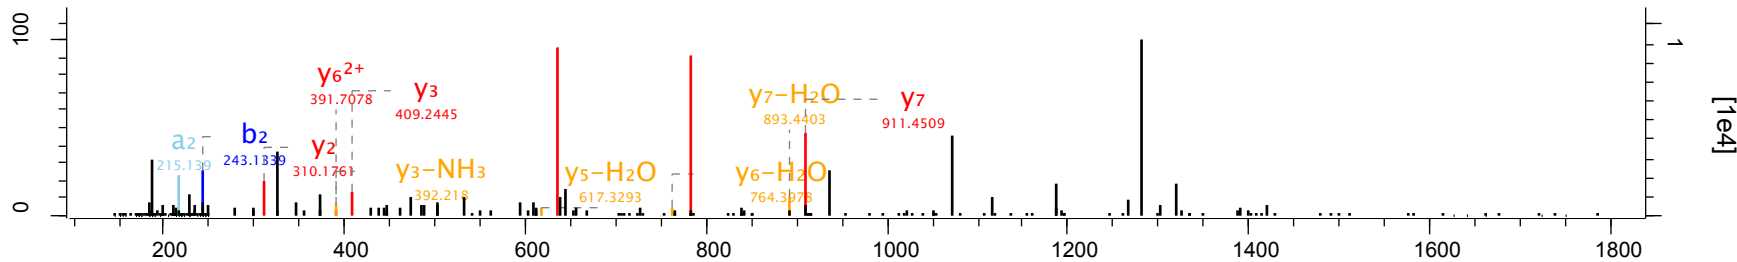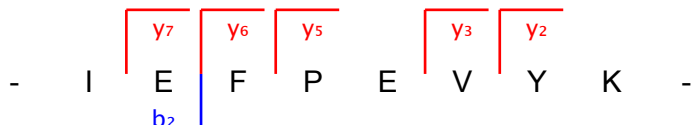

| Raw file                          | Scan  | Method   | Score | m/z    | Gene names |
|-----------------------------------|-------|----------|-------|--------|------------|
| 20150227_yeast_Top_opt_B1_01_1599 | 34670 | TOF; CID | 39.96 | 760.37 | MCM10      |

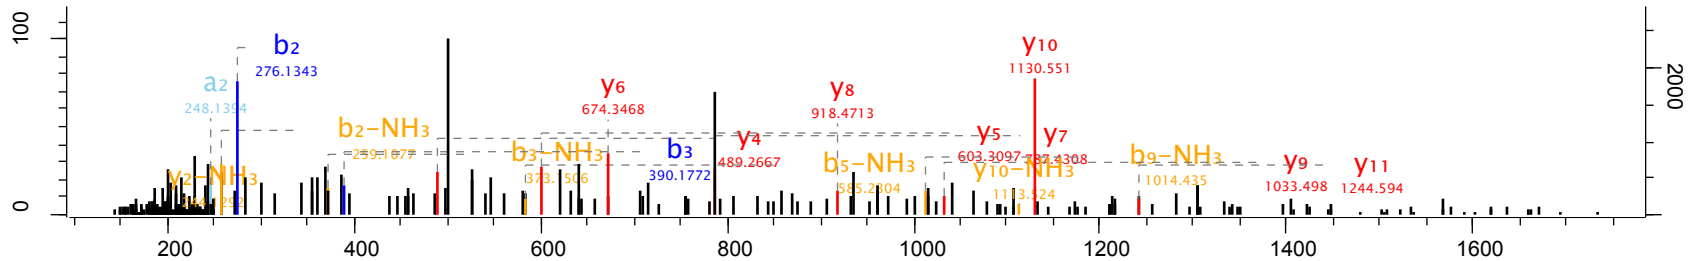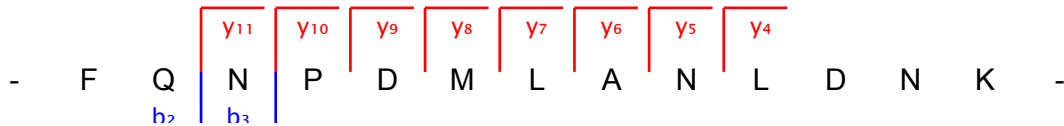



Raw file

20150227\_yeast\_Top\_opt\_B1\_01\_1599

Scan

35124

Method

TOF; CID

Score

48.98

m/z

591.3

Gene names

COX8

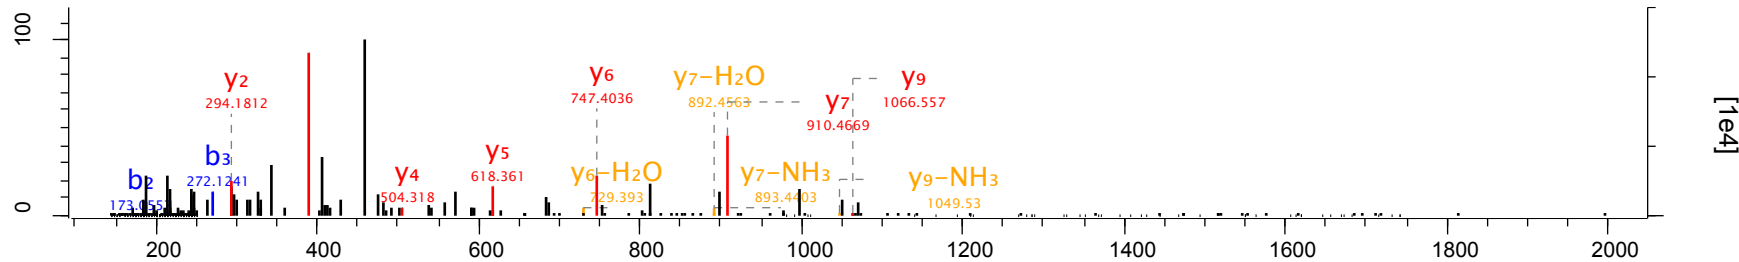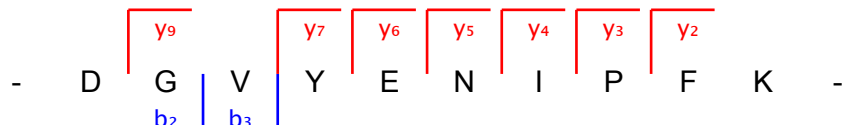

Raw file

Scan

Method

Score

m/z

Gene names

20150227\_yeast\_Top\_opt\_B1\_01\_1599

35743

TOF; CID

82.65

528.29

TEA1

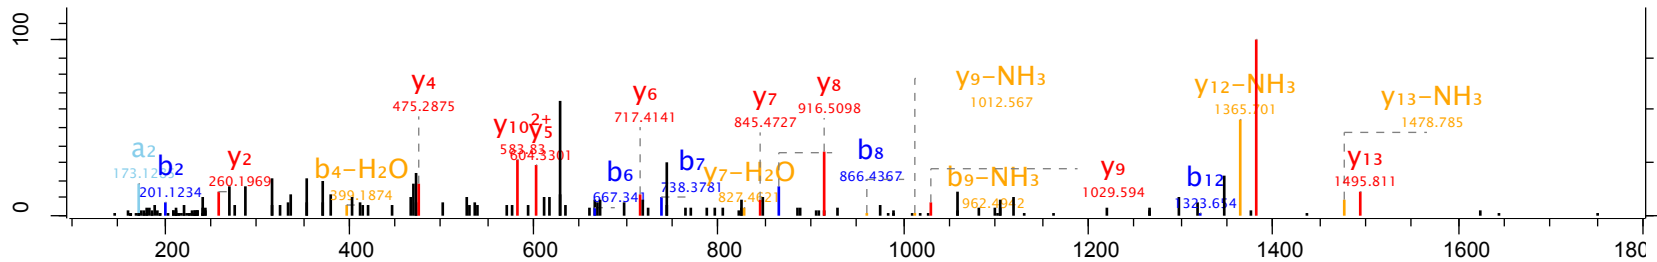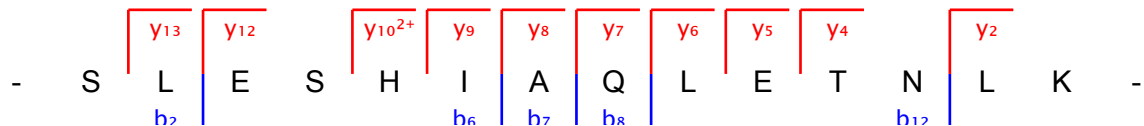

| Raw file                          | Scan  | Method   | Score  | m/z    | Gene names |
|-----------------------------------|-------|----------|--------|--------|------------|
| 20150227_yeast_Top_opt_B1_01_1599 | 36137 | TOF; CID | 163.34 | 934.96 | BIM1       |

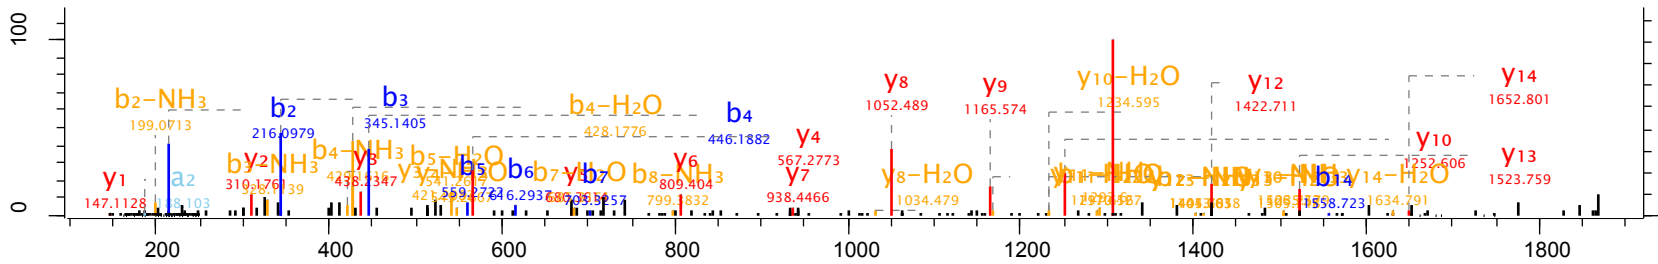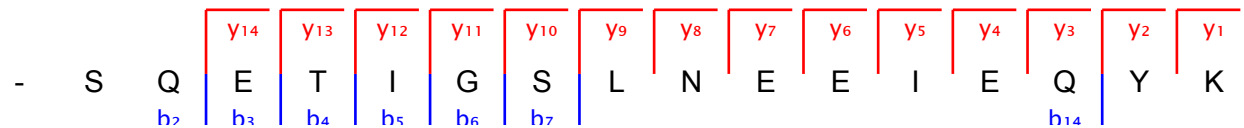

Raw file

20150227\_yeast\_Top\_opt\_B1\_01\_1599

Scan

36344

Method

TOF; CID

Score

63.87

m/z

1110.51

Gene names

KEL2

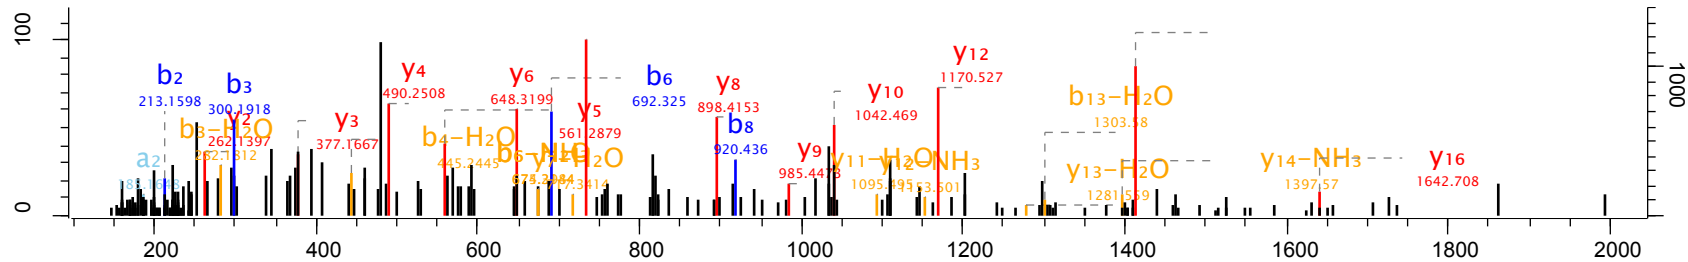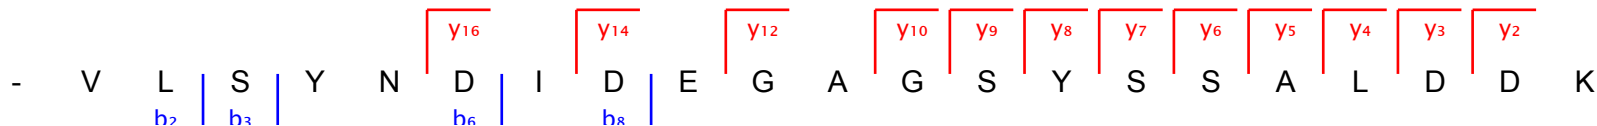

Raw file

Scan

Method

Score

m/z

Gene names

20150227\_yeast\_Top\_opt\_B1\_01\_1599

36544

TOF; CID

44.51

719.41

GUD1

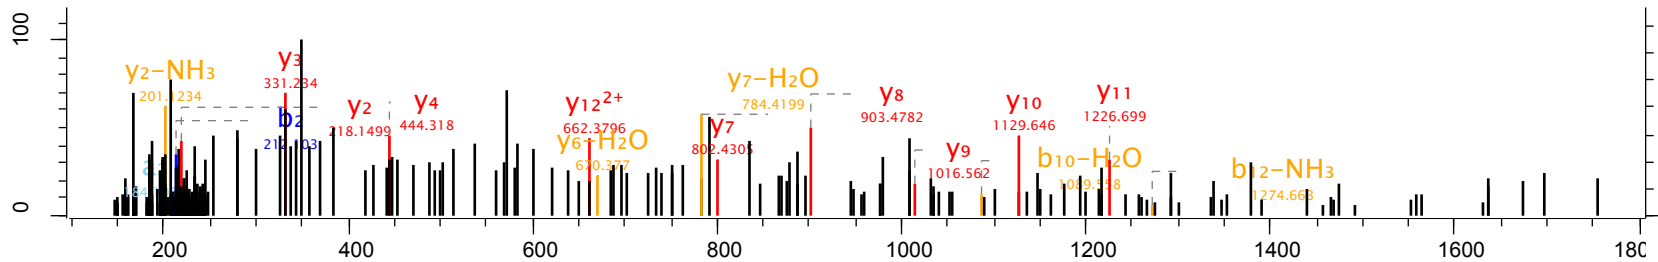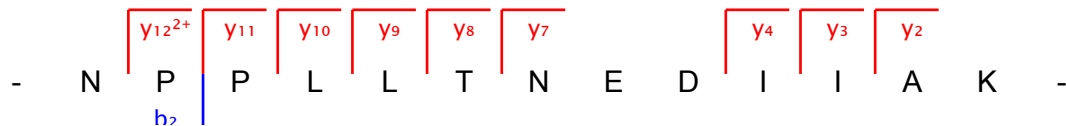

| Raw file                          | Scan  | Method   | Score | m/z    | Gene names |
|-----------------------------------|-------|----------|-------|--------|------------|
| 20150227_yeast_Top_opt_B1_01_1599 | 36572 | TOF; CID | 66.83 | 736.91 | LST4       |

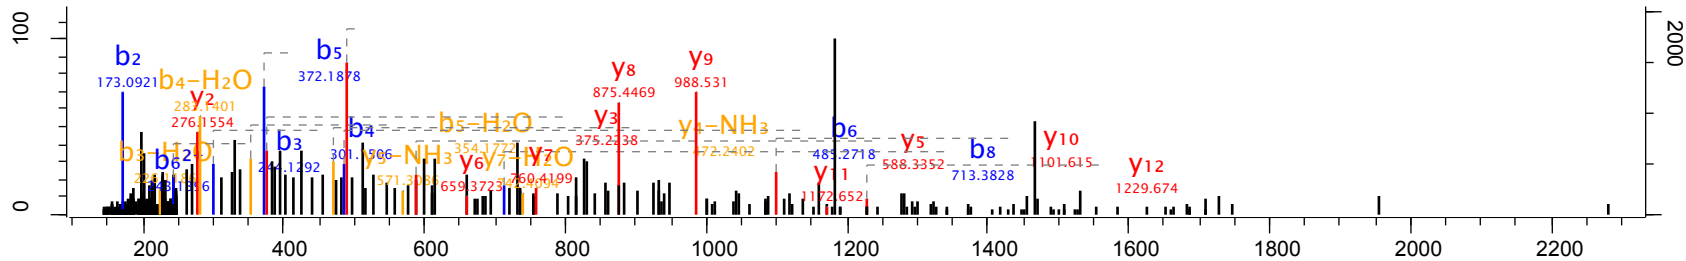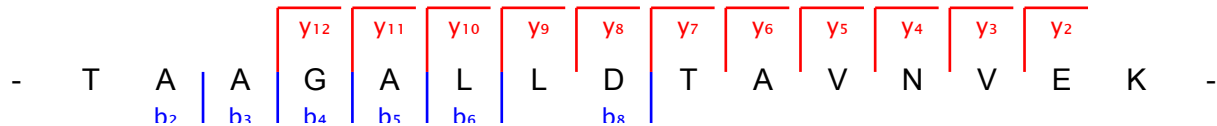

| Raw file                          | Scan  | Method   | Score | m/z    | Gene names |
|-----------------------------------|-------|----------|-------|--------|------------|
| 20150227_yeast_Top_opt_B1_01_1599 | 36811 | TOF; CID | 54.28 | 605.31 | ECM30      |

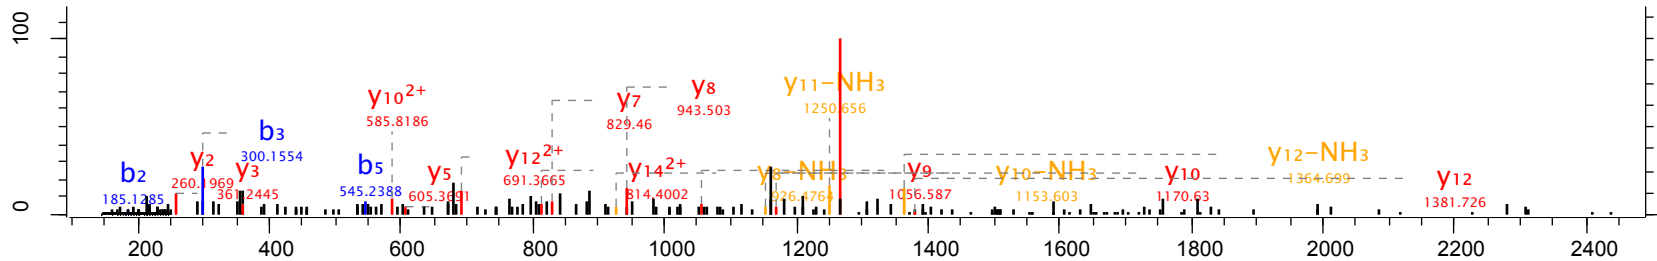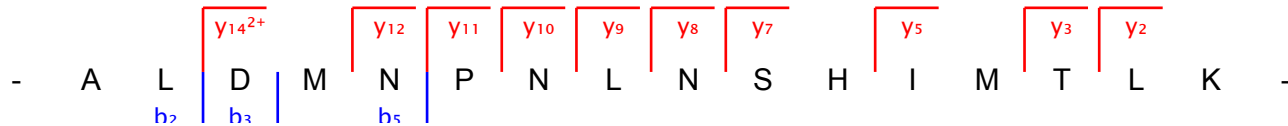

| Raw file                          | Scan  | Method   | Score | m/z    | Gene names |
|-----------------------------------|-------|----------|-------|--------|------------|
| 20150227_yeast_Top_opt_B1_01_1599 | 37530 | TOF; CID | 55.31 | 635.81 | PSF1       |

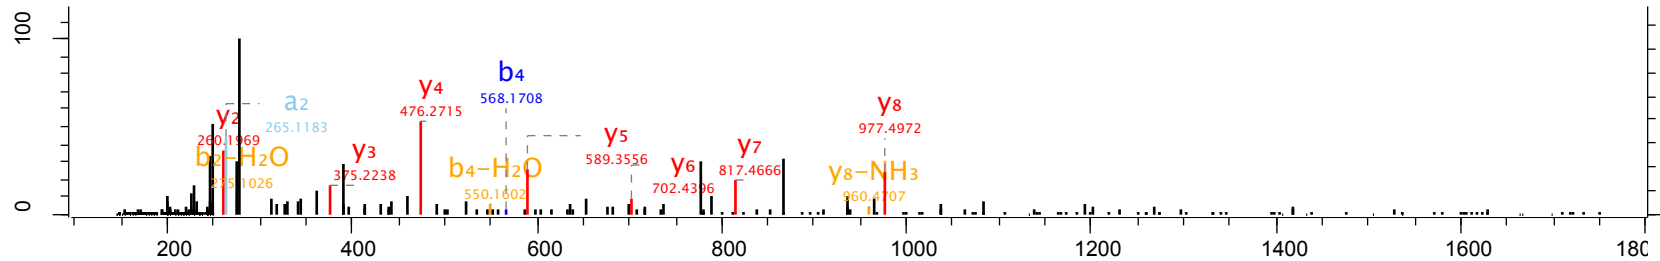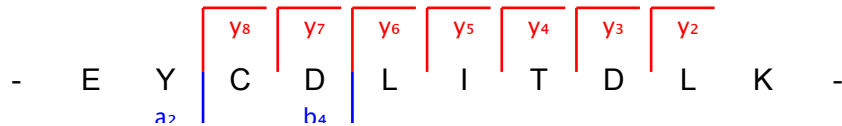



| Raw file                          | Scan  | Method   | Score  | m/z    | Gene names |
|-----------------------------------|-------|----------|--------|--------|------------|
| 20150227_yeast_Top_opt_B1_01_1599 | 37826 | TOF; CID | 142.35 | 924.44 | RPC11      |

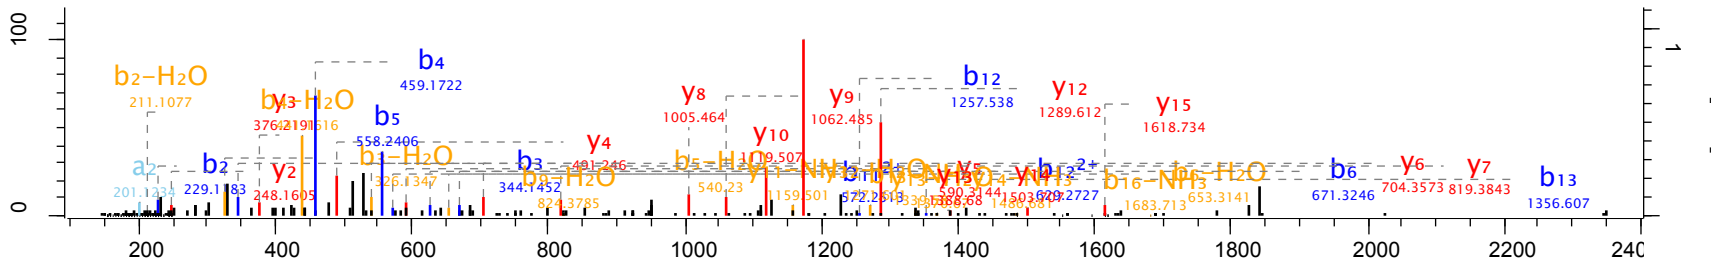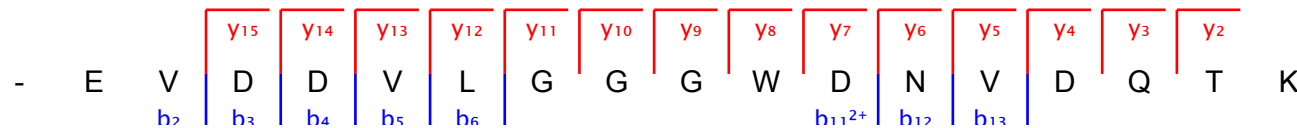

Raw file

Scan

Method

Score

m/z

Gene names

20150227\_yeast\_Top\_opt\_B1\_01\_1599

38269

TOF; CID

84.95

1111.56

TFC6

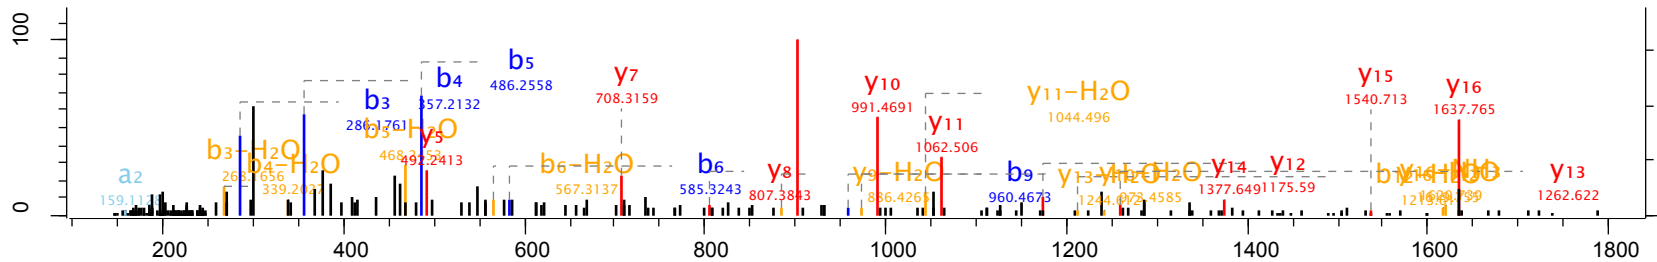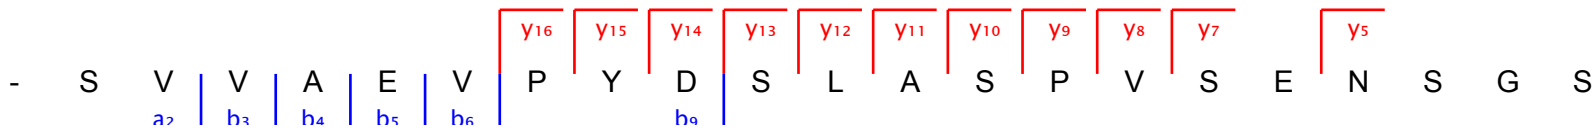

Raw file

Scan

Method

Score

m/z

Gene names

20150227\_yeast\_Top\_opt\_B1\_01\_1599

38307

TOF; CID

39.02

725.36

RSF2

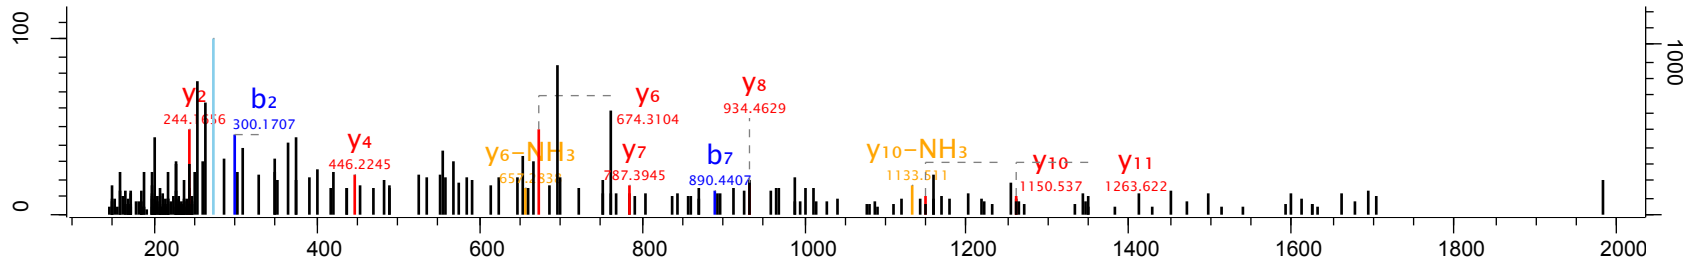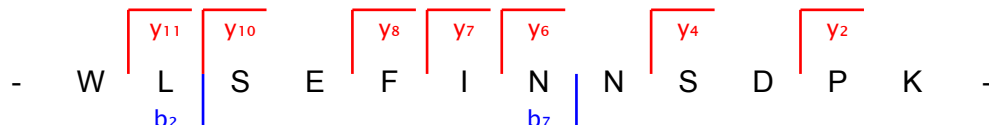

Raw file

20150227\_yeast\_Top\_opt\_B1\_01\_1599

Scan

38640

Method

TOF; CID

Score

67.21

m/z

521.83

Gene names

RLM1

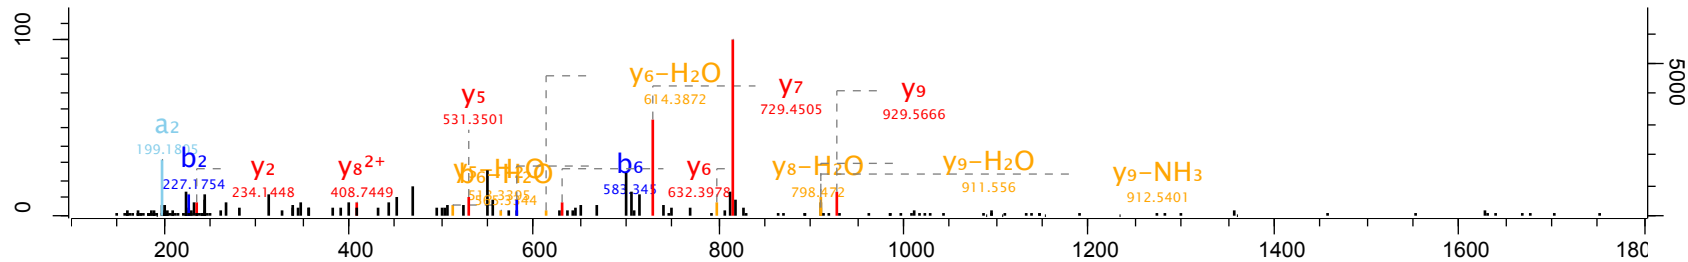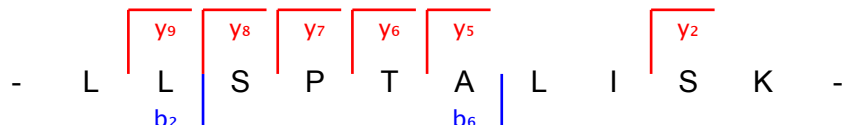

Raw file

20150227\_yeast\_Top\_opt\_B1\_01\_1599

Scan

39477

Method

TOF; CID

Score

48.91

m/z

660.37

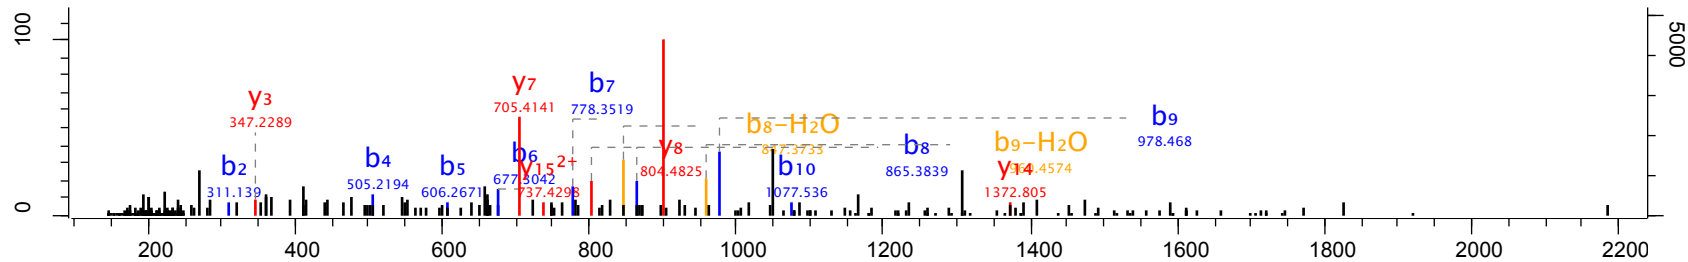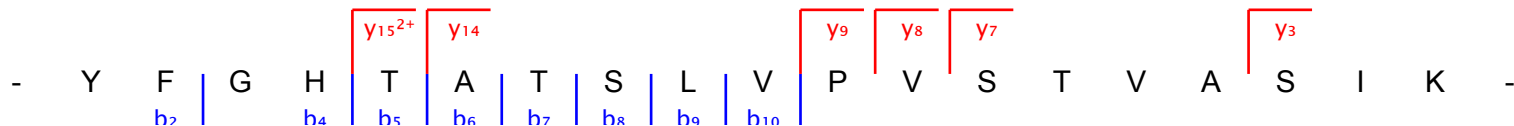

Raw file

20150227\_yeast\_Top\_opt\_B1\_01\_1599

Scan

Method

Score

m/z

Gene names

40108

TOF; CID

64.78

430.79

MET2

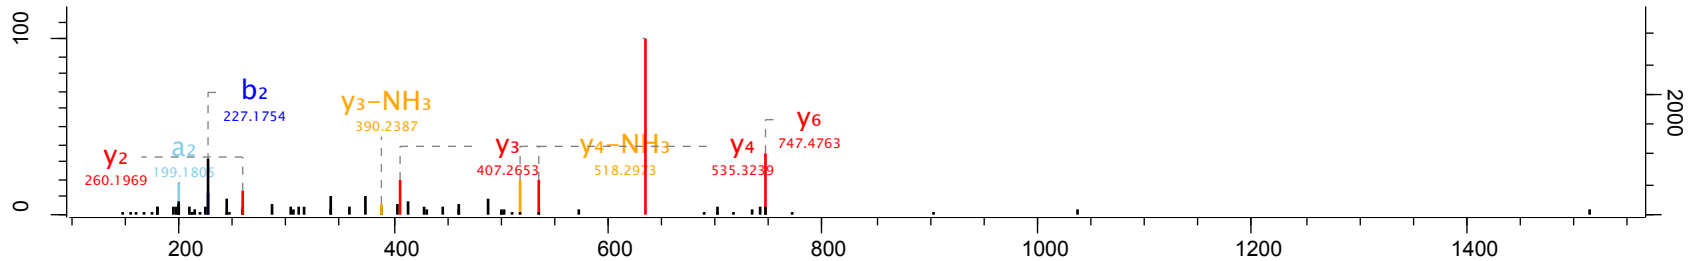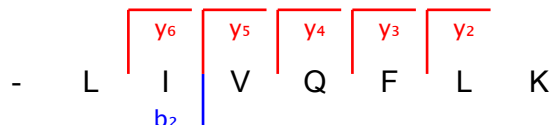

Raw file

Scan

Method

Score

m/z

Gene names

20150227\_yeast\_Top\_opt\_B1\_01\_1599

40462

TOF; CID

39.01

693.36

SYF2

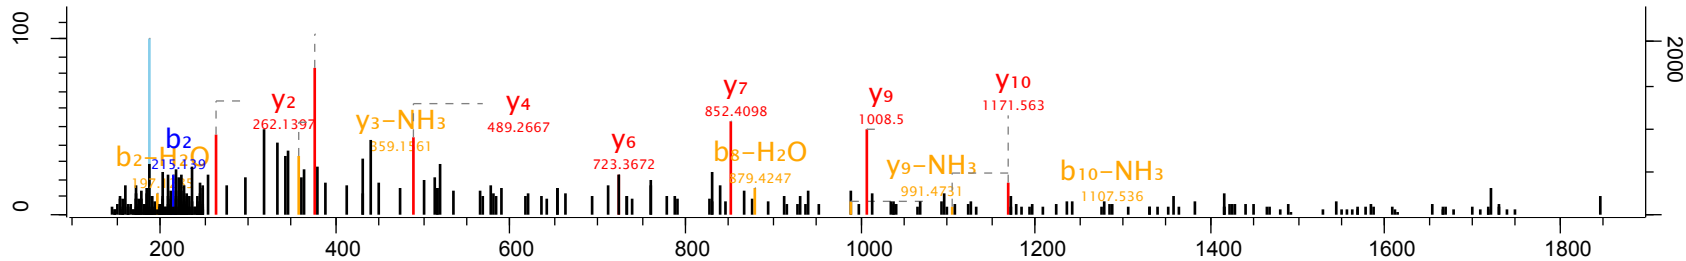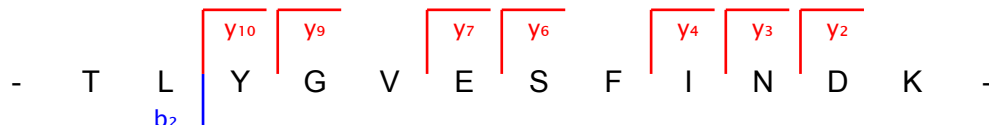

| Raw file                          | Scan  | Method   | Score | m/z    | Gene names |
|-----------------------------------|-------|----------|-------|--------|------------|
| 20150227_yeast_Top_opt_B1_01_1599 | 40760 | TOF; CID | 82.29 | 554.81 | YPS1       |

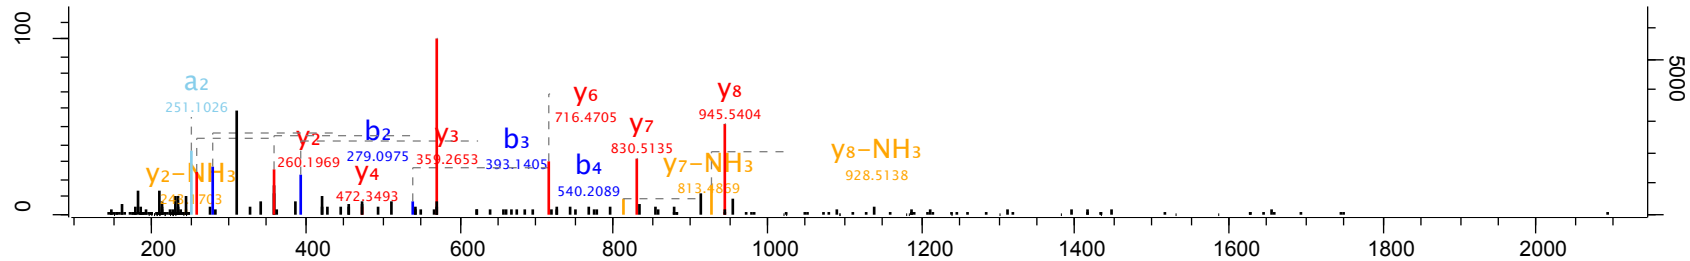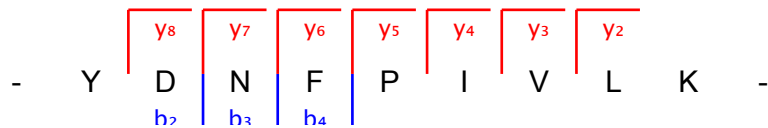



Raw file

20150227\_yeast\_Top\_opt\_B1\_01\_1599

Scan

41162

Method

TOF; CID

Score

68.64

m/z

1075.04

Gene names

PZF1

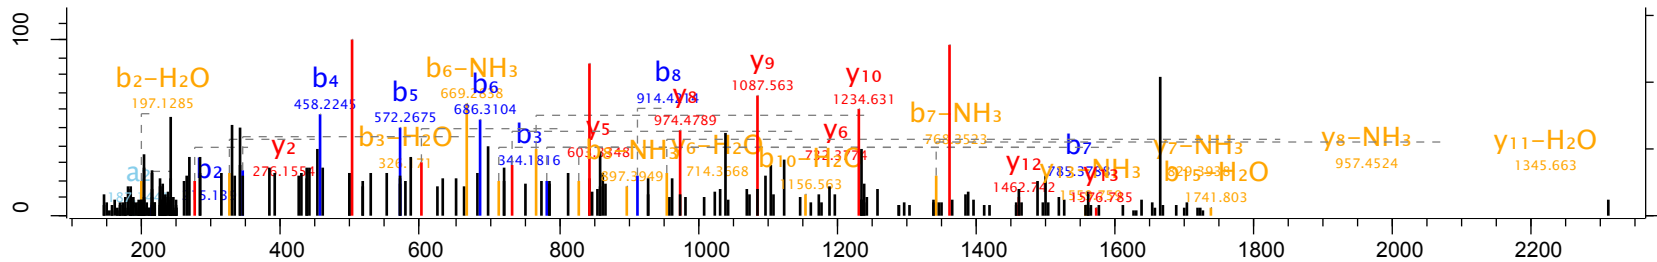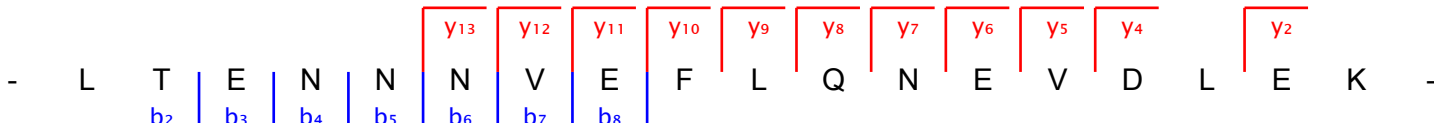

Raw file

20150227\_yeast\_Top\_opt\_B1\_01\_1599

Scan

41306

Method

TOF; CID

Score

99.82

m/z

496.8

Gene names

TRS130

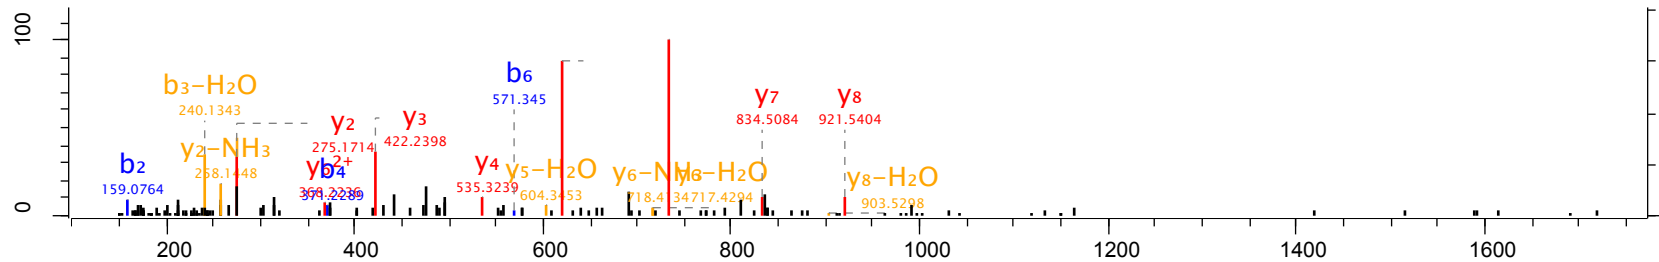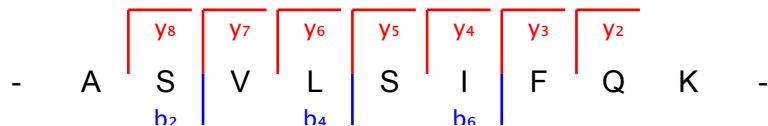

Raw file

Scan

Method

Score

m/z

Gene names

20150227\_yeast\_Top\_opt\_B1\_01\_1599

41614

TOF; CID

35.84

845.43

LDB7

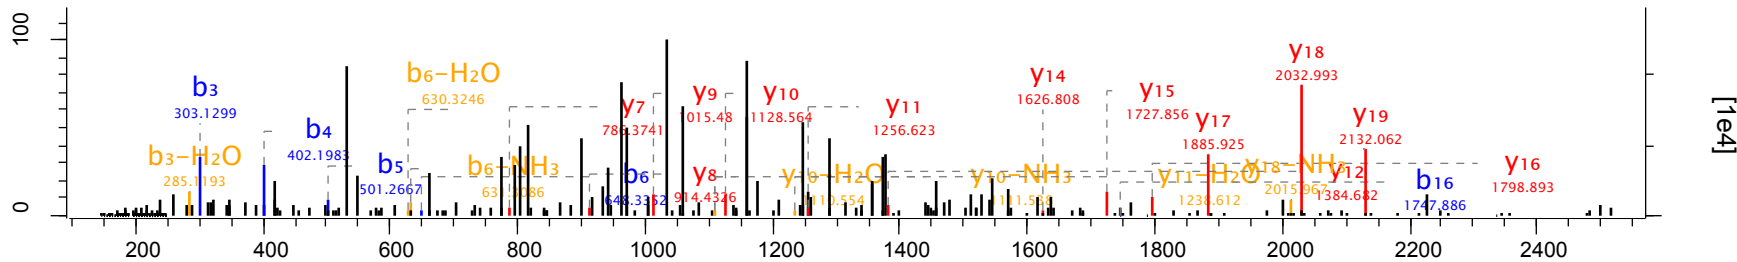

- S S Q V V F S A T E L Q Q L T Q Q S H A T

b<sub>3</sub> | b<sub>4</sub> | b<sub>5</sub> | b<sub>6</sub> | y<sub>7</sub> | y<sub>8</sub> | y<sub>9</sub> | y<sub>10</sub> | y<sub>11</sub> | y<sub>12</sub> | y<sub>14</sub> | y<sub>15</sub> | y<sub>16</sub> | y<sub>17</sub> | y<sub>18</sub> | y<sub>19</sub>

Raw file

Scan

Method

Score

m/z

Gene names

20150227\_yeast\_Top\_opt\_B1\_01\_1599

41755

TOF; CID

76.21

994.51

MIX23

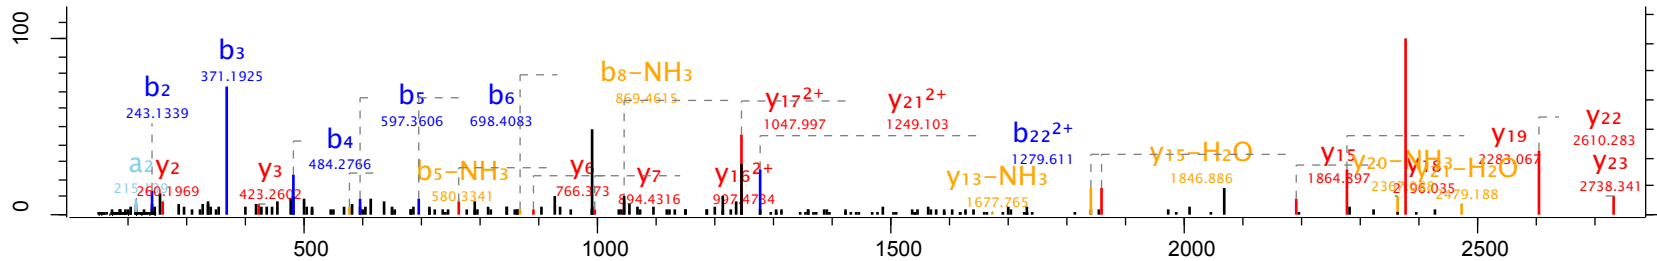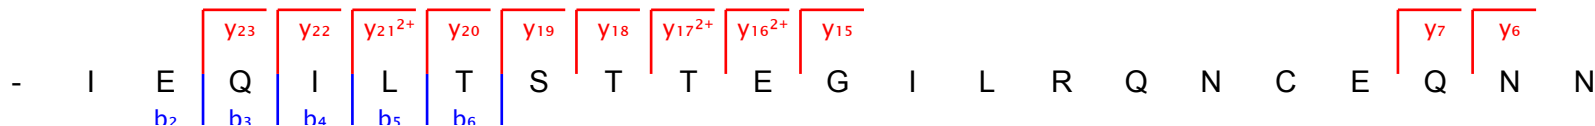

| Raw file                          | Scan  | Method   | Score | m/z    | Gene names |
|-----------------------------------|-------|----------|-------|--------|------------|
| 20150227_yeast_Top_opt_B1_01_1599 | 43257 | TOF; CID | 54.26 | 562.81 | SMF2       |

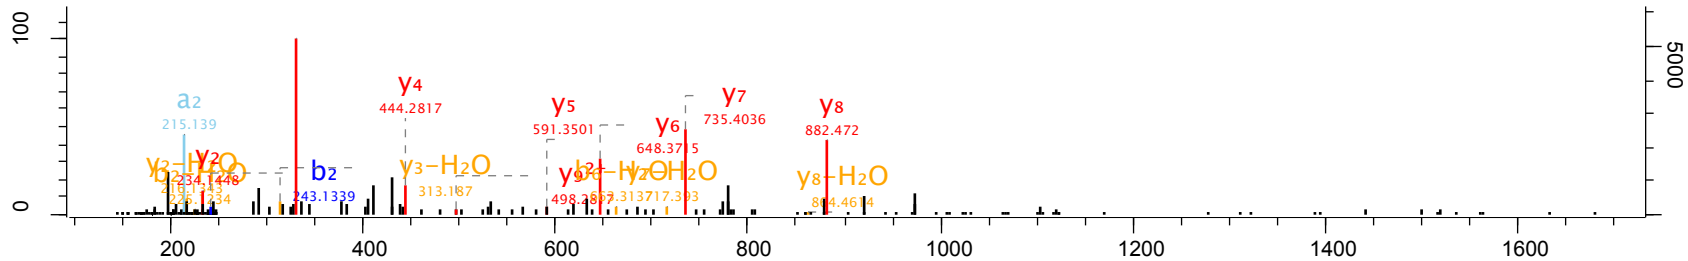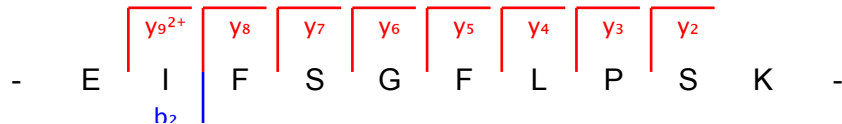

Raw file

Scan

Method

Score

m/z

Gene names

20150227\_yeast\_Top\_opt\_B1\_01\_1599

43868

TOF; CID

62.09

533.96

RHO4

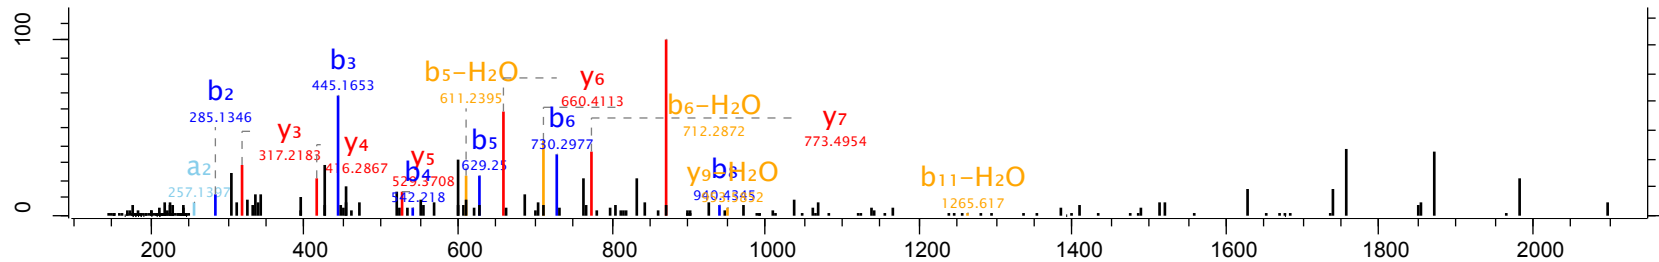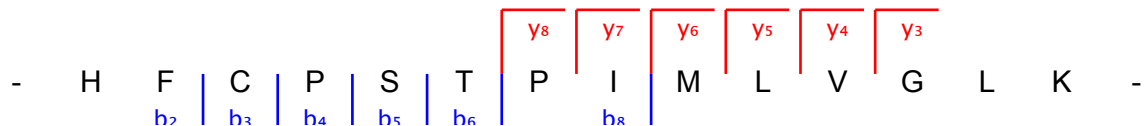

Raw file

Scan

Method

Score

m/z

Gene names

20150227\_yeast\_Top\_opt\_B1\_01\_1599

44079

TOF; CID

97.8

866.45

TIM17

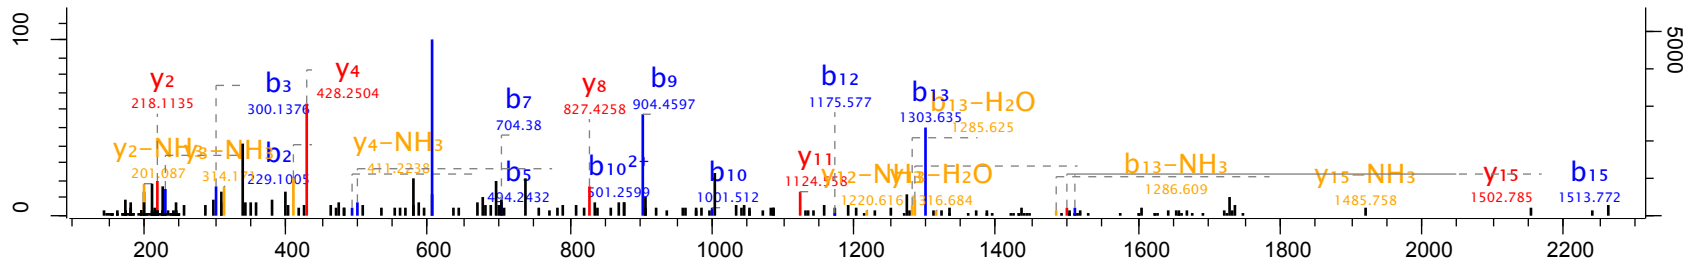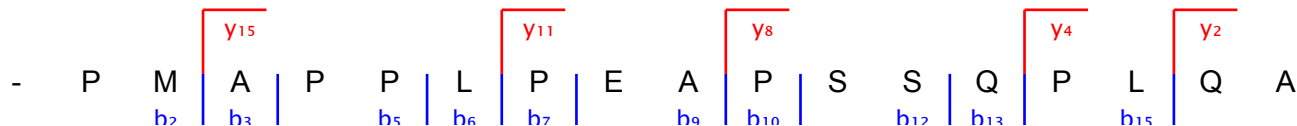

| Raw file                          | Scan  | Method   | Score  | m/z    | Gene names |
|-----------------------------------|-------|----------|--------|--------|------------|
| 20150227_yeast_Top_opt_B1_01_1599 | 44165 | TOF; CID | 116.55 | 638.35 | RSM10      |

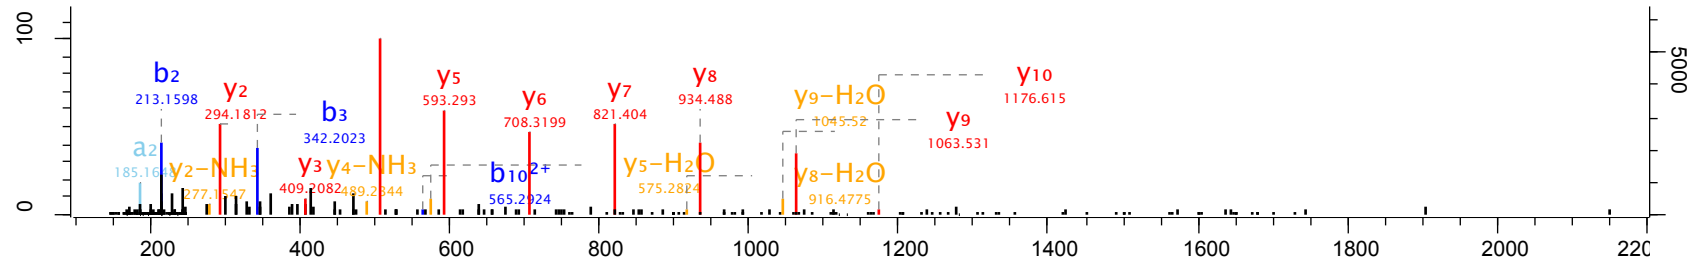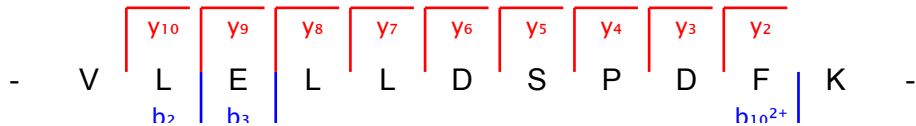



Raw file

20150227\_yeast\_Top\_opt\_B1\_01\_1599

Scan

44241

Method

TOF; CID

Score

74.78

m/z

615.82

Gene names

CUE4

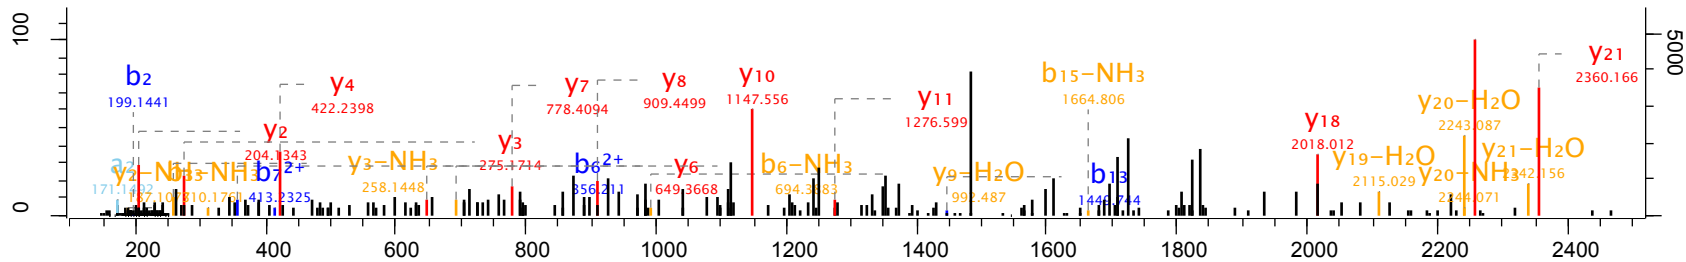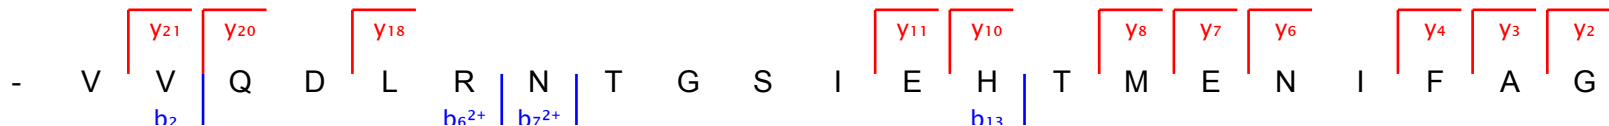

Raw file

20150227\_yeast\_Top\_opt\_B1\_01\_1599

Scan

45396

Method

TOF; CID

Score

43.84

m/z

867.46

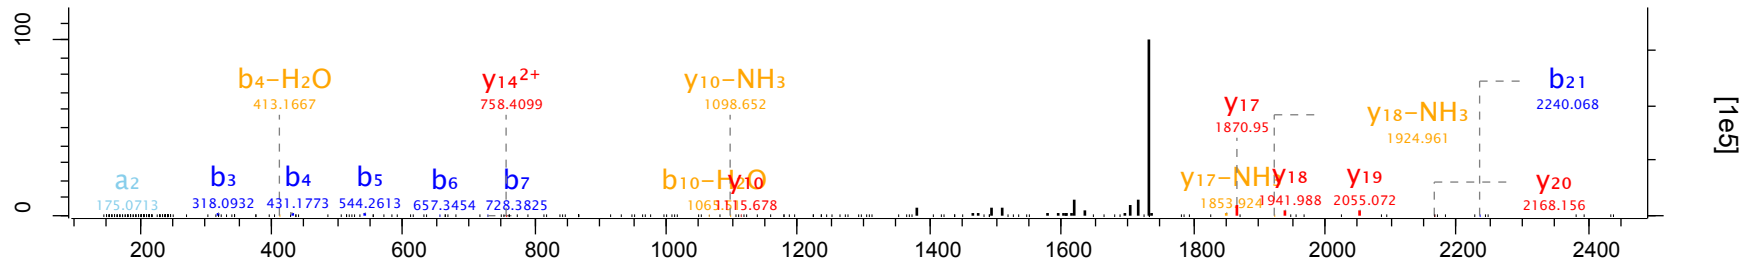

- S D D L I L A P E E N N G D T A L L R S D

a<sub>2</sub> b<sub>3</sub> b<sub>4</sub> b<sub>5</sub> b<sub>6</sub> b<sub>7</sub> y<sub>20</sub> y<sub>19</sub> y<sub>18</sub> y<sub>17</sub> y<sub>14</sub><sup>2+</sup> y<sub>10</sub> b<sub>21</sub>

| Raw file                          | Scan  | Method   | Score | m/z    | Gene names |
|-----------------------------------|-------|----------|-------|--------|------------|
| 20150227_yeast_Top_opt_B1_01_1599 | 46076 | TOF; CID | 55.06 | 491.32 | GIS4       |

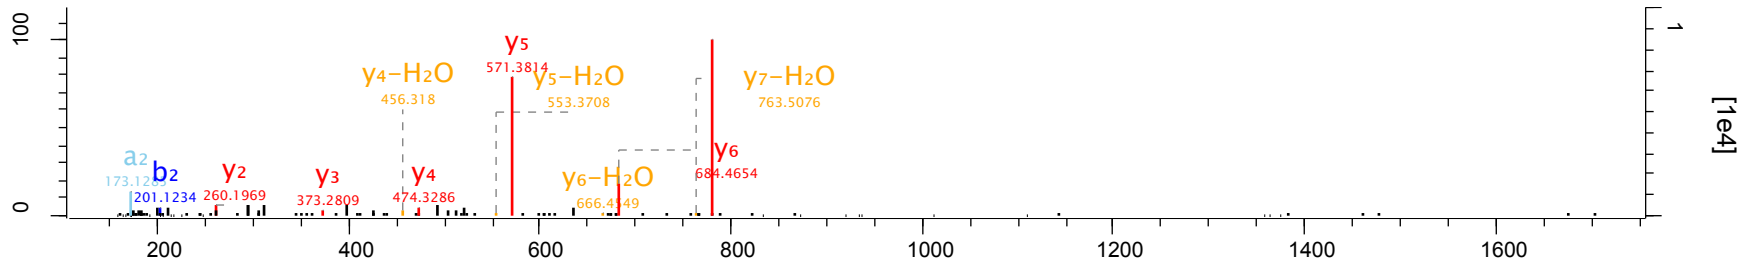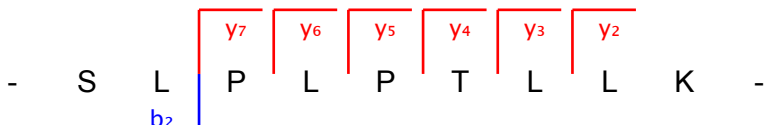

Raw file

20150227\_yeast\_Top\_opt\_B1\_01\_1599

Scan

46148

Method

TOF; CID

Score

61.82

m/z

599.33

Gene names

MRPL49

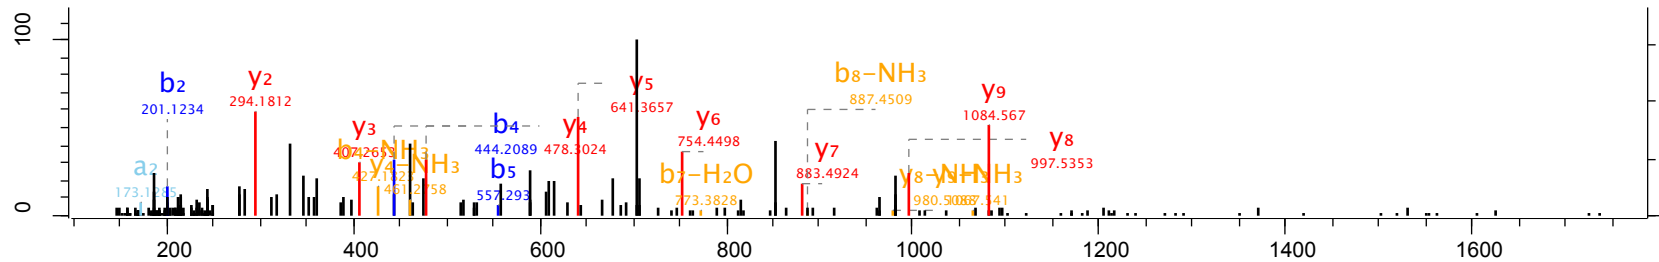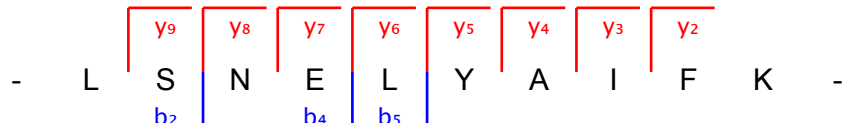

Raw file

20150227\_yeast\_Top\_opt\_B1\_01\_1599

Scan

46750

Method

TOF; CID

Score

47.92

m/z

1009.54

Gene names

SAE2

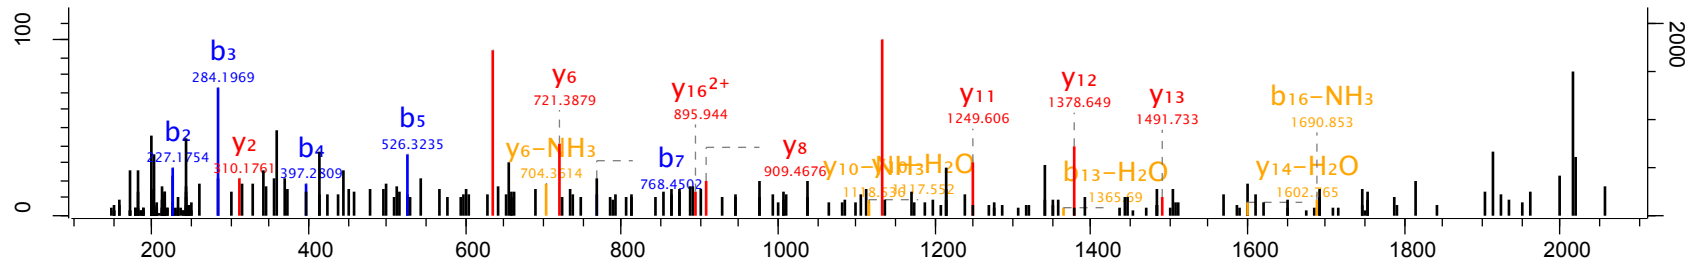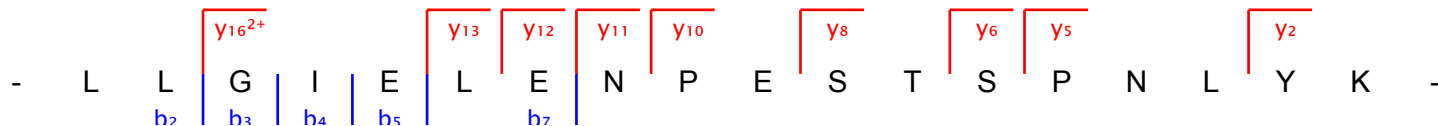

Raw file

Scan

Method

Score

m/z

Gene names

20150227\_yeast\_Top\_opt\_B1\_01\_1599

46788

TOF; CID

61.48

931.47

OST2

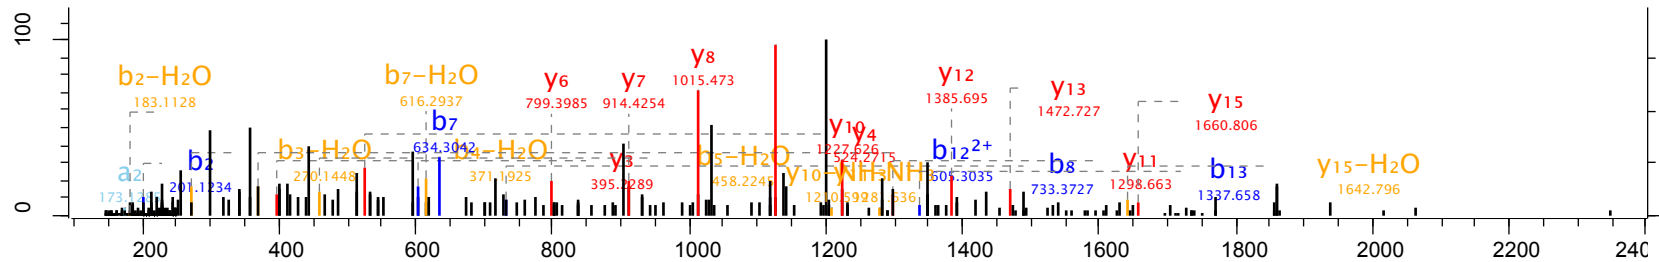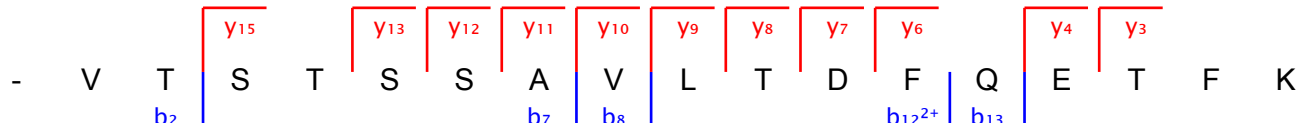

Raw file

20150227\_yeast\_Top\_opt\_B1\_01\_1599

Scan

47288

Method

TOF; CID

Score

44.97

m/z

701.9

Gene names

ATG38

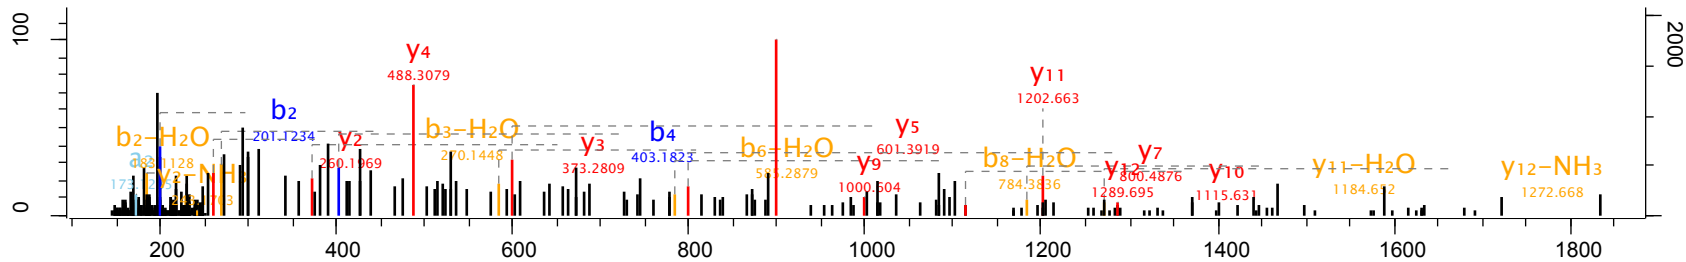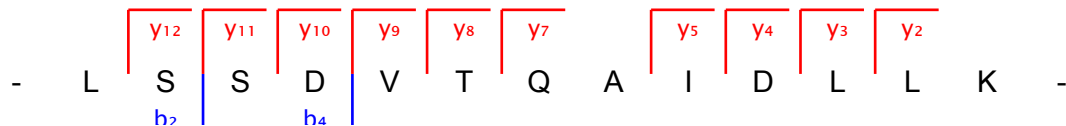

Raw file

20150227\_yeast\_Top\_opt\_B1\_01\_1599

Scan

47625

Method

TOF; CID

Score

51.31

m/z

774.71

Gene names

PEX7

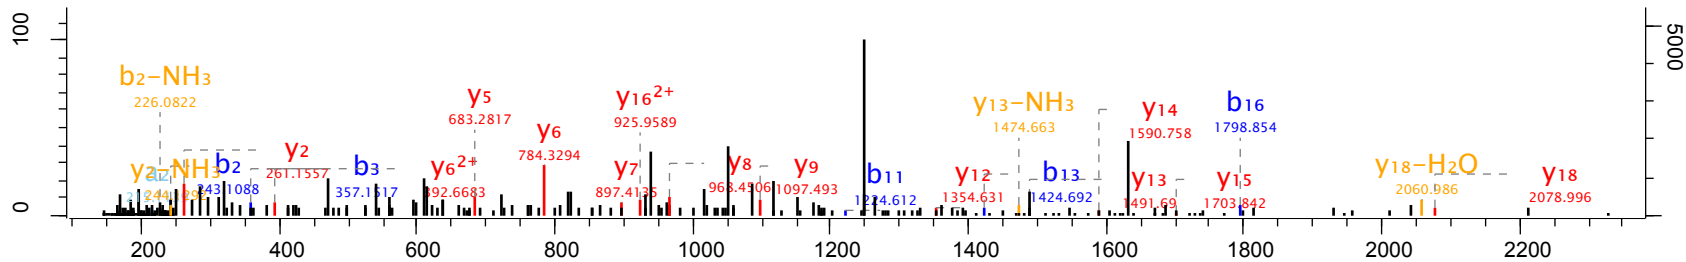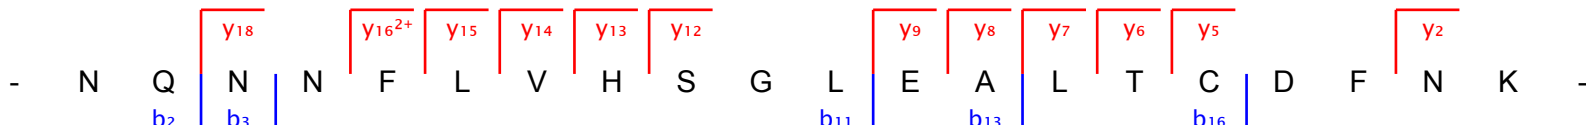



Raw file

Scan

Method

Score

m/z

Gene names

20150227\_yeast\_Top\_opt\_B1\_01\_1599

47750

TOF; CID

39.21

940.49

PFS2

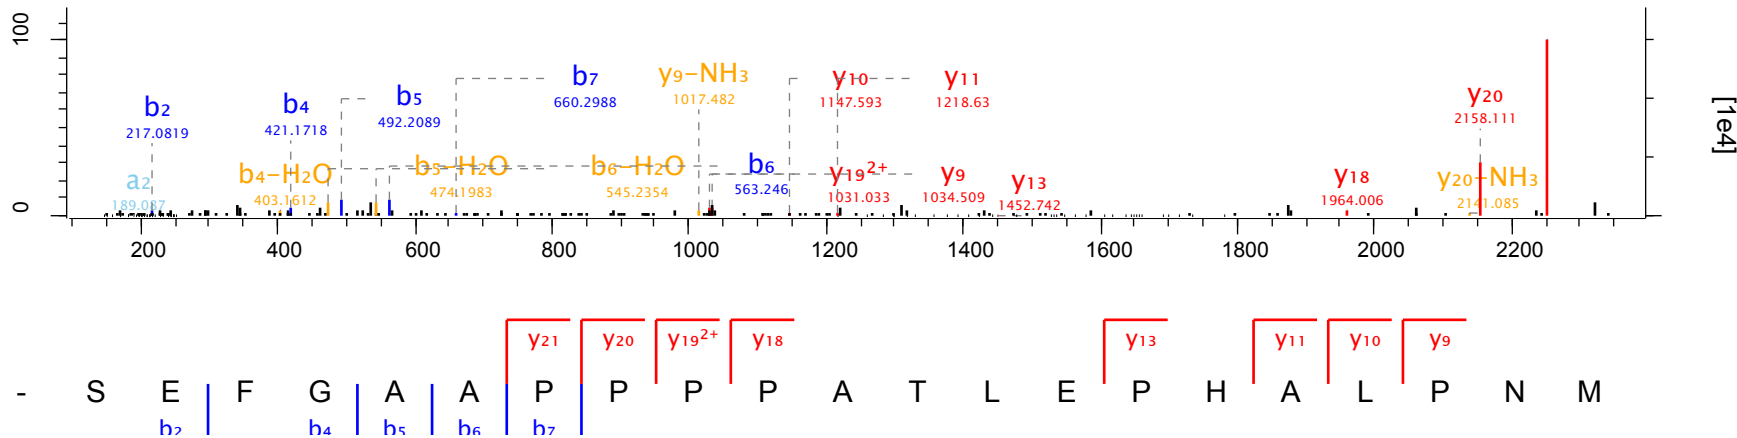

| Raw file                          | Scan  | Method   | Score  | m/z    | Gene names |
|-----------------------------------|-------|----------|--------|--------|------------|
| 20150227_yeast_Top_opt_B1_01_1599 | 47865 | TOF; CID | 109.83 | 823.92 | ART5       |

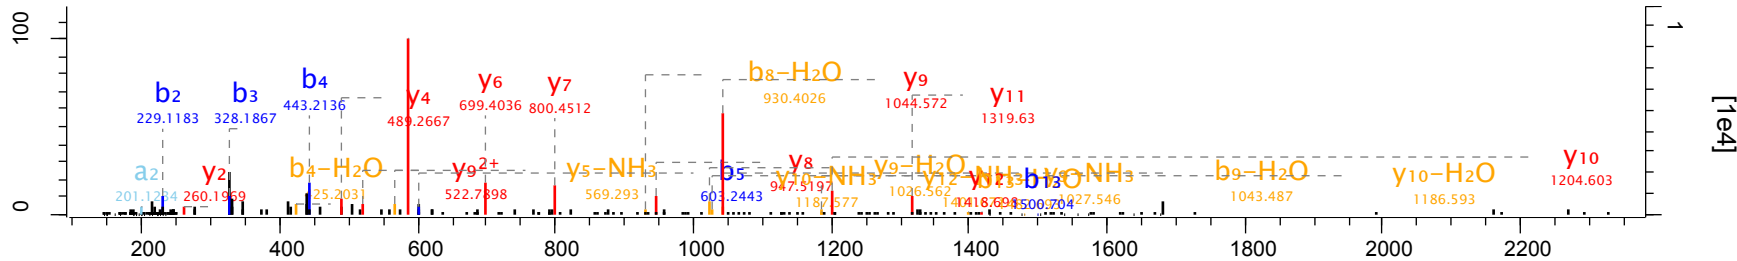

- L D V D C P F T I P D N L K -  
           b<sub>2</sub> b<sub>3</sub> b<sub>4</sub> b<sub>5</sub> y<sub>12</sub> y<sub>11</sub> y<sub>10</sub> y<sub>9</sub> y<sub>8</sub> y<sub>7</sub> y<sub>6</sub> y<sub>5</sub> y<sub>4</sub> y<sub>2</sub>  
           b<sub>2</sub> b<sub>3</sub> b<sub>4</sub> b<sub>5</sub>

| Raw file                          | Scan  | Method   | Score | m/z    | Gene names |
|-----------------------------------|-------|----------|-------|--------|------------|
| 20150227_yeast_Top_opt_B1_01_1599 | 48640 | TOF; CID | 56.57 | 694.42 | ARG2       |

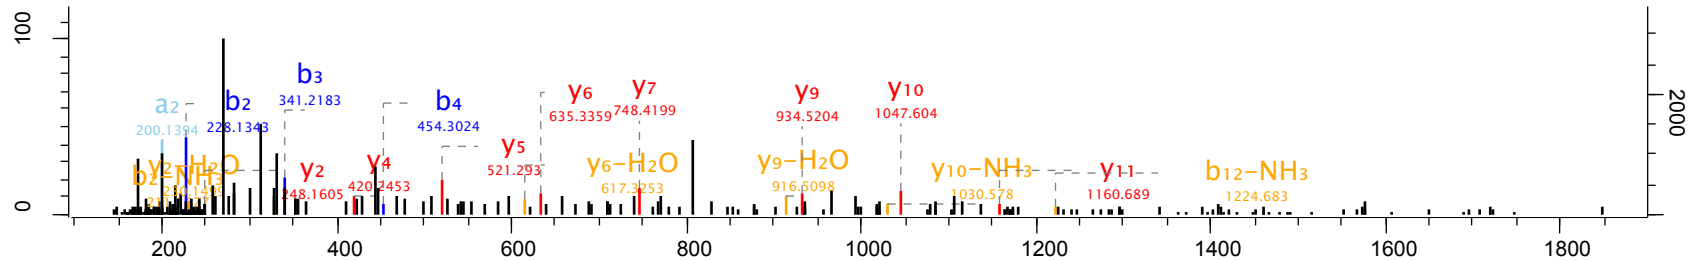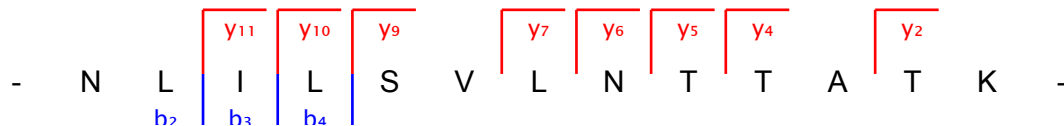

Raw file

Scan

Method

Score

m/z

Gene names

20150227\_yeast\_Top\_opt\_B1\_01\_1599

48925

TOF; CID

109.1

723.39

HIF1

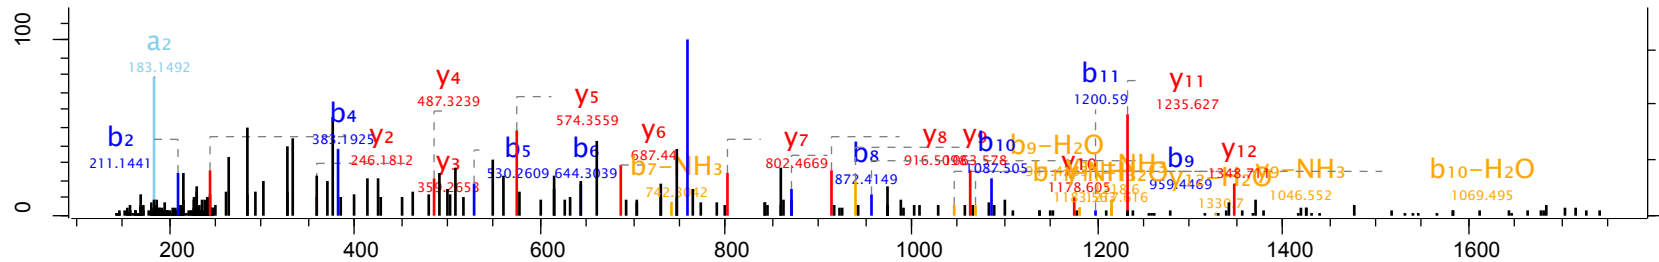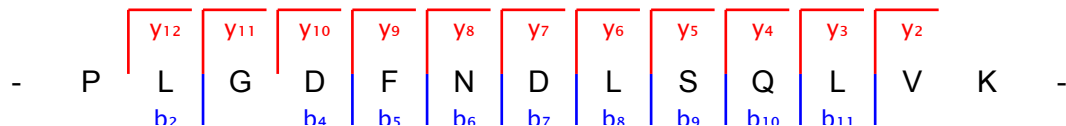

Raw file

Scan

Method

Score

m/z

Gene names

20150227\_yeast\_Top\_opt\_B1\_01\_1599

56502

TOF; CID

42.35

753.41

POR2

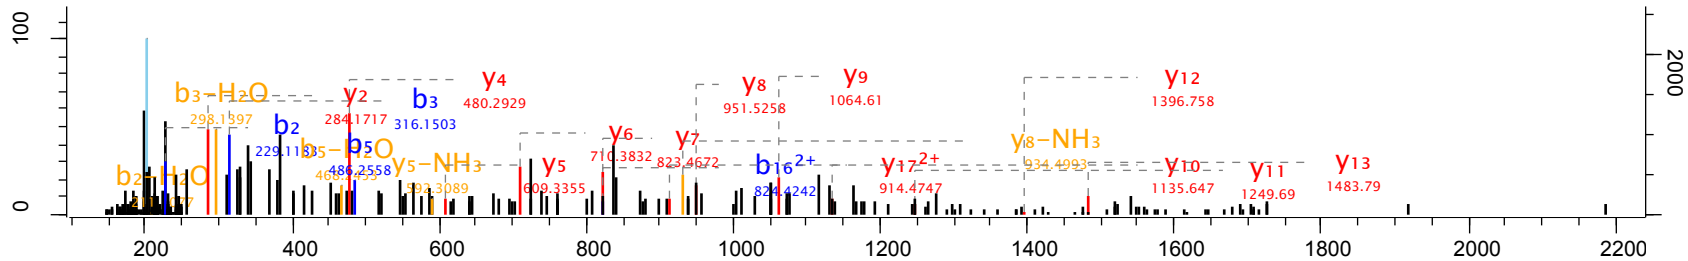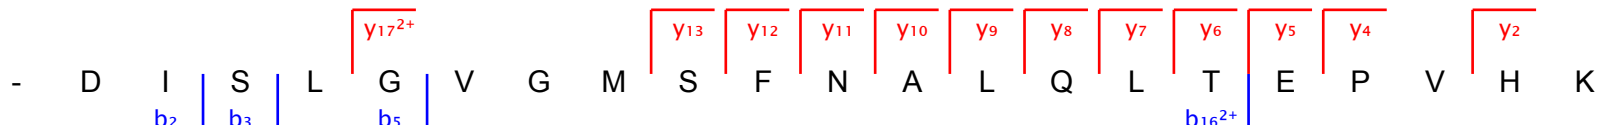

Raw file

20150227\_yeast\_Top\_opt\_B1\_01\_1599

Scan

56955

Method

TOF; CID

Score

111.64

m/z

1053.54

Gene names

PEX4

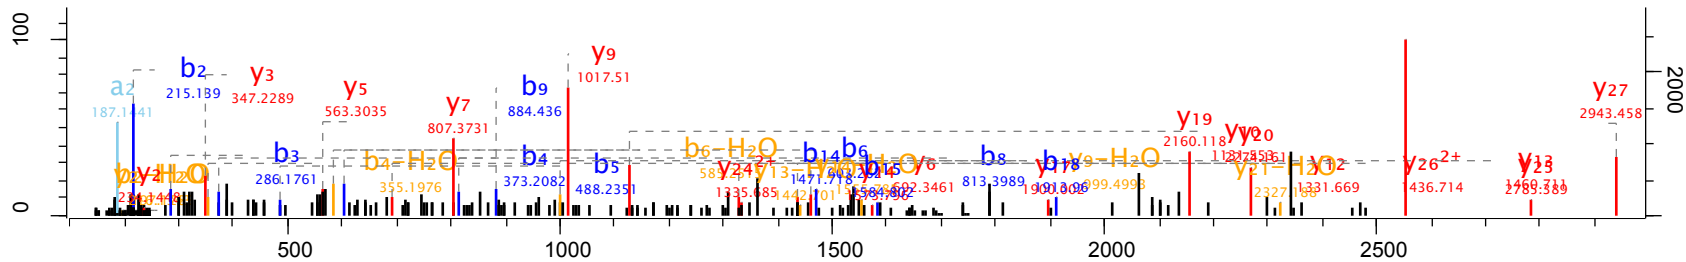

- T L A S D D P I A N P Y R G I I E S L N P

b<sub>2</sub> y<sub>27</sub> y<sub>26</sub><sup>2+</sup> y<sub>25</sub> y<sub>24</sub><sup>2+</sup> y<sub>23</sub> y<sub>20</sub> y<sub>19</sub> y<sub>17</sub> y<sub>14</sub> y<sub>13</sub> y<sub>12</sub> y<sub>10</sub> y<sub>9</sub>  
b<sub>3</sub> b<sub>4</sub> b<sub>5</sub> b<sub>6</sub> b<sub>8</sub> b<sub>9</sub> b<sub>14</sub> b<sub>15</sub> b<sub>18</sub>

Raw file

Scan

Method

Score

m/z

Gene names

20150227\_yeast\_Top\_opt\_B1\_01\_1599

58045

TOF; CID

92.15

1405.73

YDC1

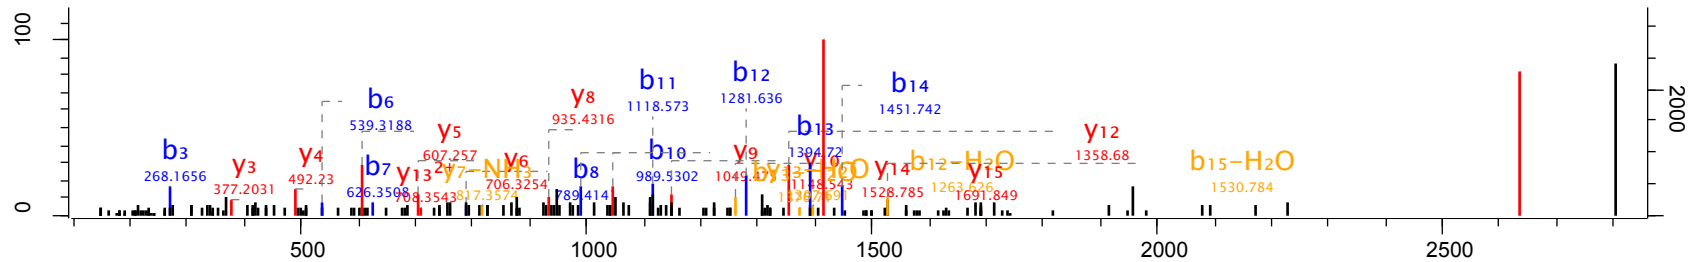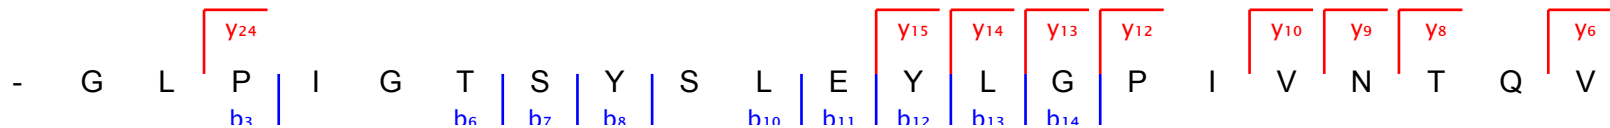

Raw file

Scan

Method

Score

m/z

Gene names

20150227\_yeast\_Top\_opt\_B1\_01\_1599

58416

TOF; CID

54.76

1004.55

PET100

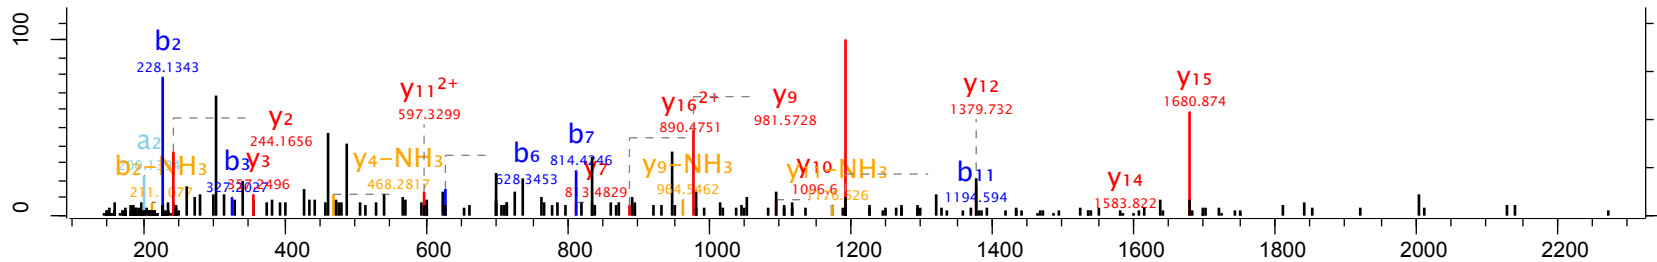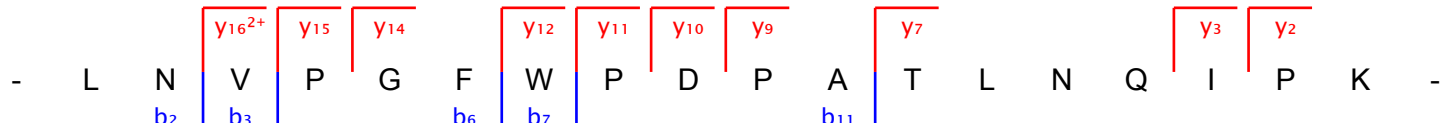



| Raw file                          | Scan  | Method   | Score | m/z    | Gene names |
|-----------------------------------|-------|----------|-------|--------|------------|
| 20150227_yeast_Top_opt_B1_01_1599 | 59282 | TOF; CID | 58.96 | 869.78 | STE18      |

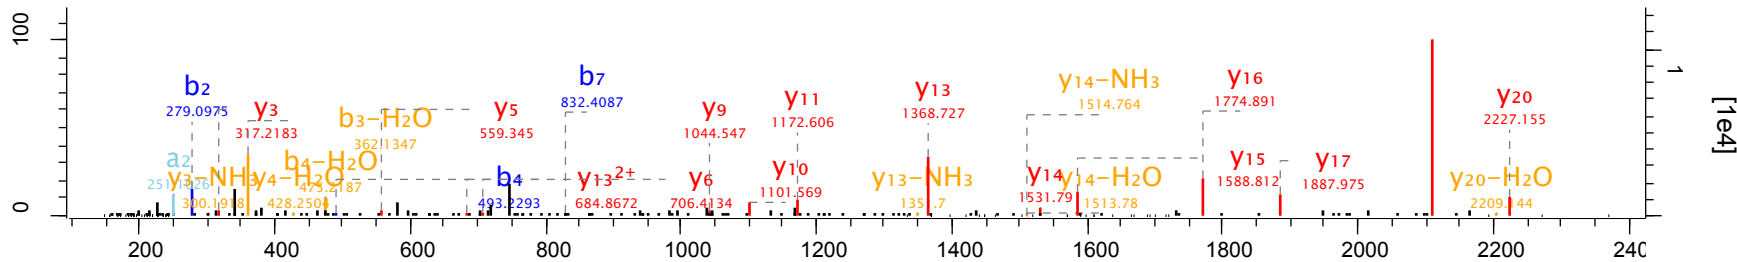

- D Y T L P E L W G Y P V A G S N H F I E G  
       |      |      |      |      |      |      |      |      |      |      |      |      |      |  
       b<sub>2</sub>      b<sub>4</sub>      b<sub>7</sub>

| Raw file                          | Scan  | Method   | Score | m/z    | Gene names |
|-----------------------------------|-------|----------|-------|--------|------------|
| 20150227_yeast_Top_opt_B1_01_1599 | 61423 | TOF; CID | 54.09 | 754.44 | LSM5       |

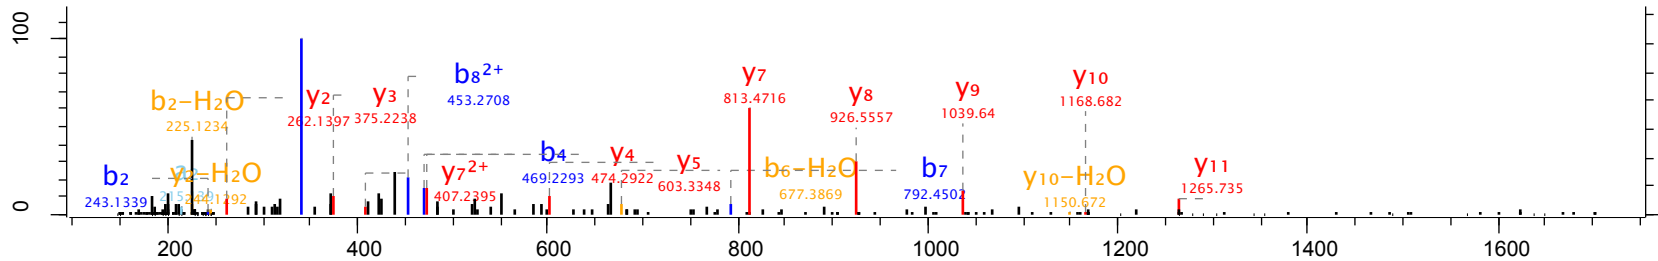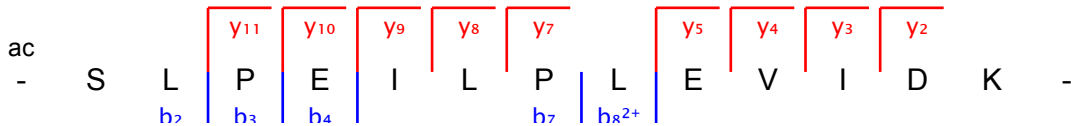

| Raw file                           | Scan | Method   | Score | m/z    | Gene names |
|------------------------------------|------|----------|-------|--------|------------|
| 20150228_yeast1_Top_opt_B1_01_1611 | 1269 | TOF; CID | 93.16 | 414.21 | ECM15      |

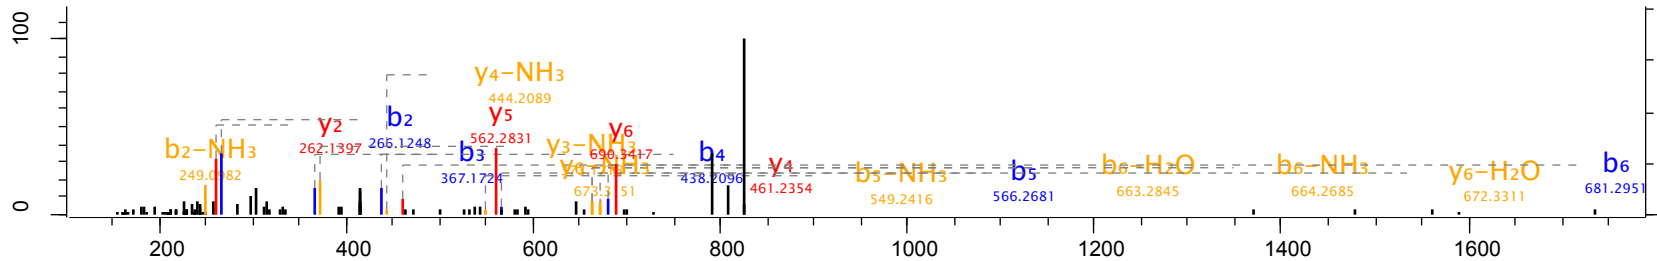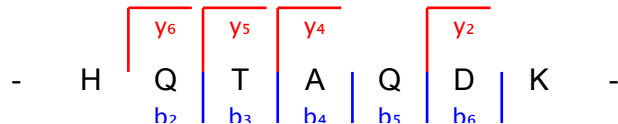

| Raw file                           | Scan | Method   | Score | m/z    | Gene names |
|------------------------------------|------|----------|-------|--------|------------|
| 20150228_yeast1_Top_opt_B1_01_1611 | 2318 | TOF; CID | 60.79 | 398.24 | RPL29      |

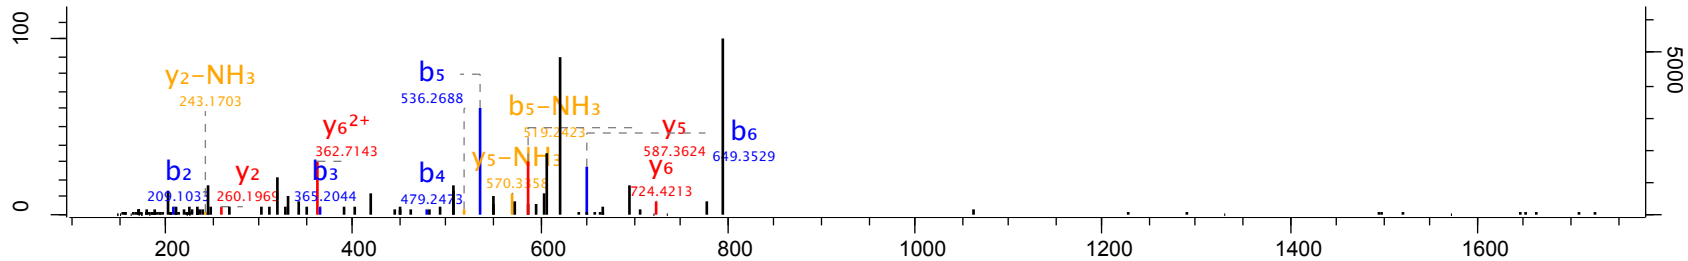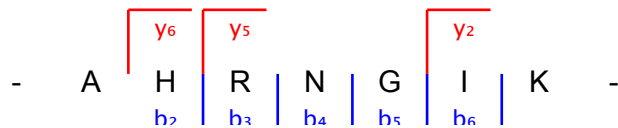

Raw file

20150228\_yeast1\_Top\_opt\_B1\_01\_1611

Scan

4124

Method

TOF; CID

Score

104.81

m/z

744.27

Gene names

CUP1-2;CUP1-1

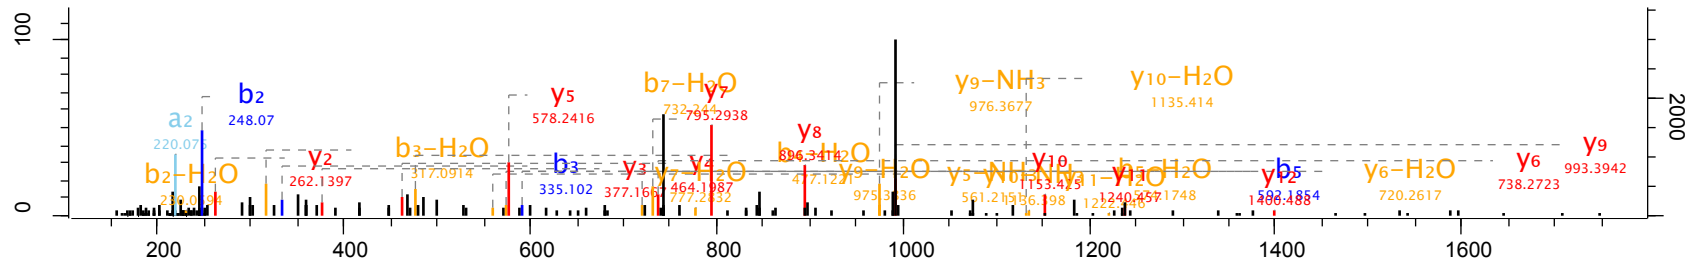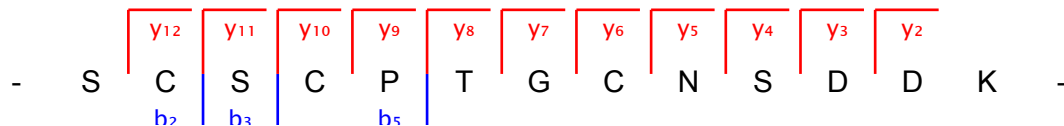

| Raw file                           | Scan | Method   | Score | m/z    | Gene names |
|------------------------------------|------|----------|-------|--------|------------|
| 20150228_yeast1_Top_opt_B1_01_1611 | 4734 | TOF; CID | 84.17 | 482.23 | AGP1       |

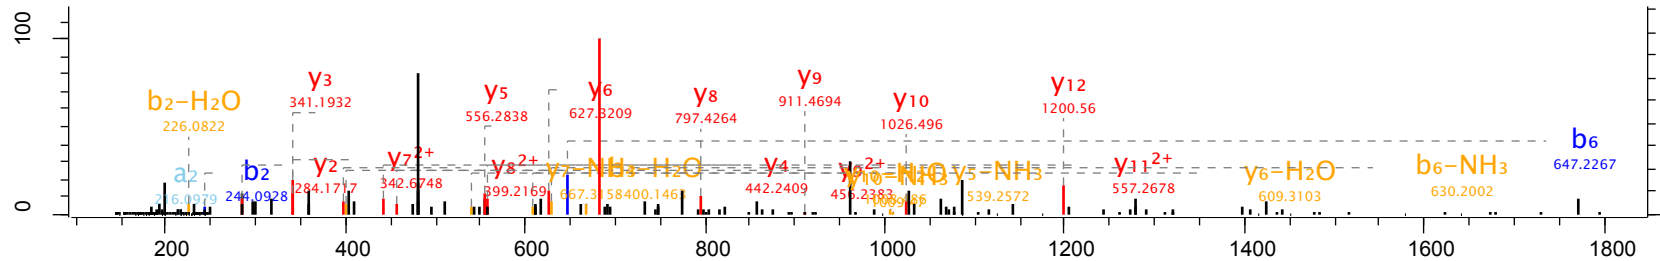

- N E S S D N I G A N T G H K -  
 b<sub>2</sub> h<sub>6</sub>

y<sub>12</sub> y<sub>11</sub><sup>2+</sup> y<sub>10</sub> y<sub>9</sub> y<sub>8</sub> y<sub>7</sub> y<sub>6</sub> y<sub>5</sub> y<sub>4</sub> y<sub>3</sub> y<sub>2</sub>

Raw file

Scan

Method

Score

m/z

Gene names

20150228\_yeast1\_Top\_opt\_B1\_01\_1611

5783

TOF; CID

97.07

469.23

TIM9

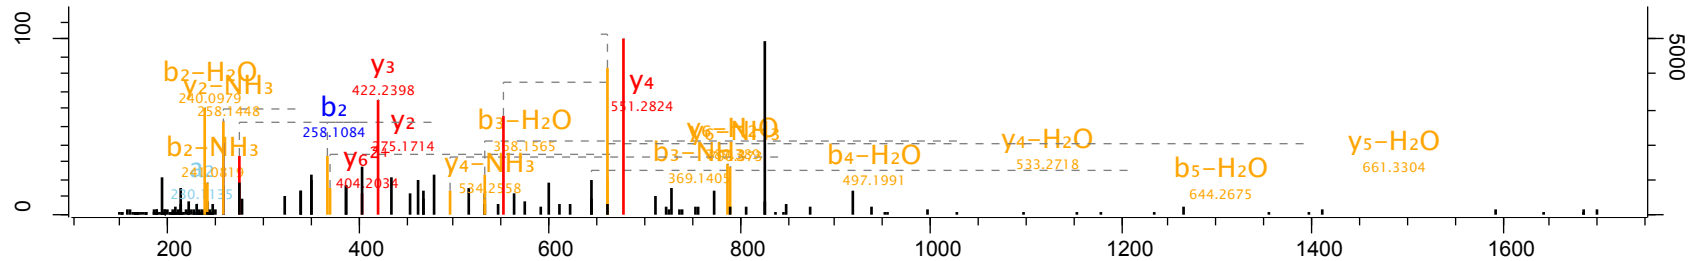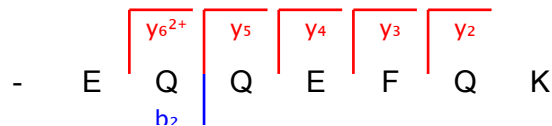

Raw file

20150228\_yeast1\_Top\_opt\_B1\_01\_1611

Scan

5860

Method

TOF; CID

Score

75.74

m/z

614.31

Gene names

PRM5

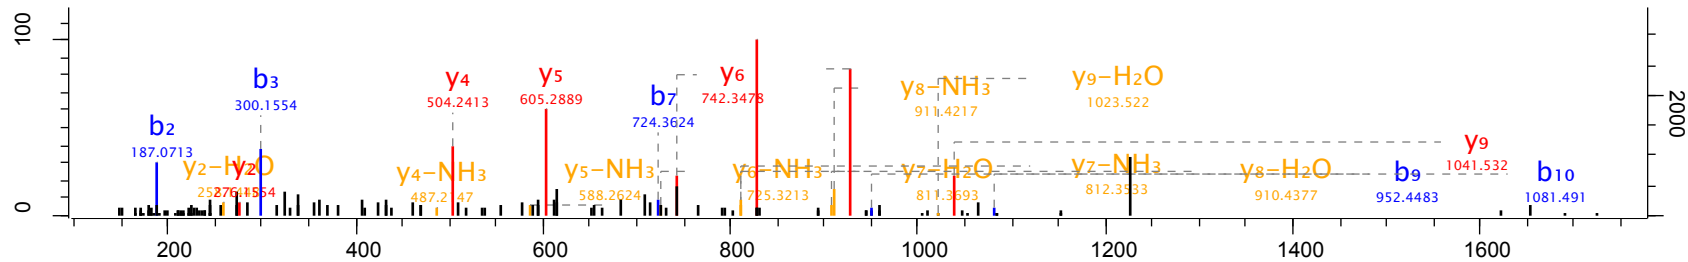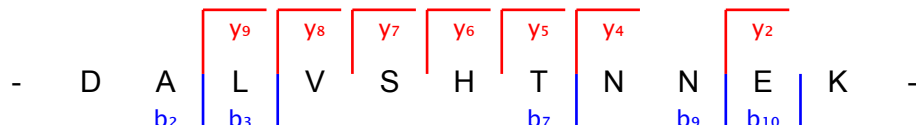



Raw file

Scan

Method

Score

m/z

Gene names

20150228\_yeast1\_Top\_opt\_B1\_01\_1611

6092

TOF; CID

49.45

634.84

RAD53

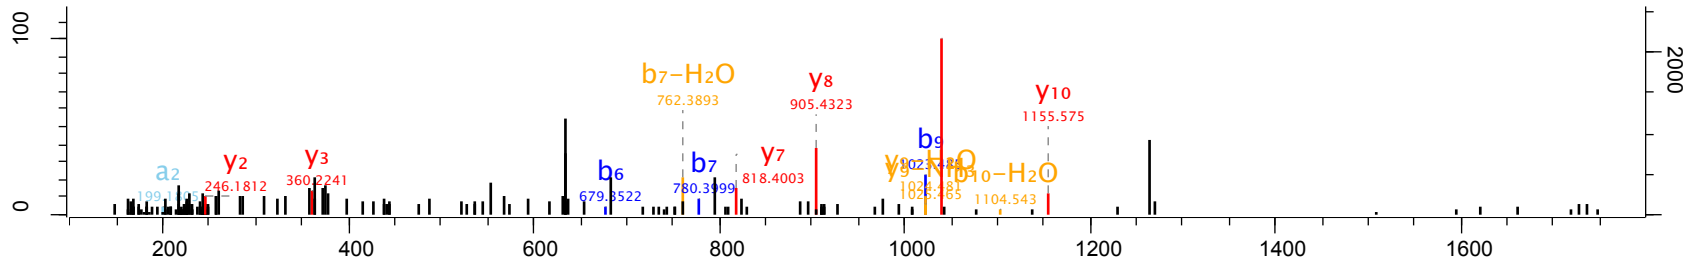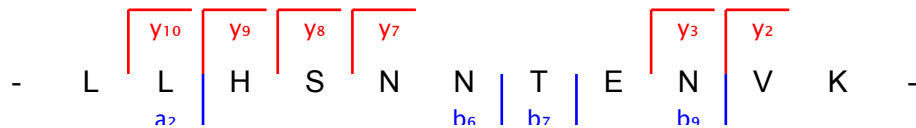

Raw file

20150228\_yeast1\_Top\_opt\_B1\_01\_1611

Scan

6434

Method

TOF; CID

Score

113.62

m/z

548.75

Gene names

MIX17

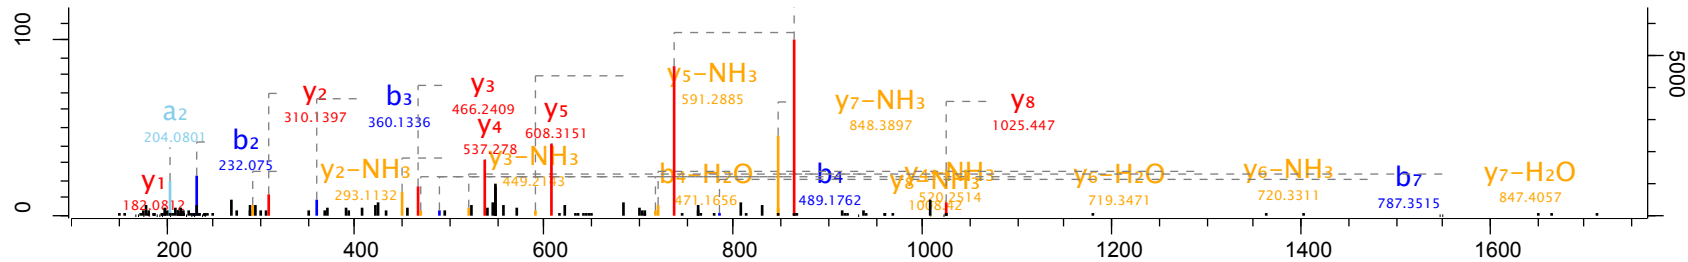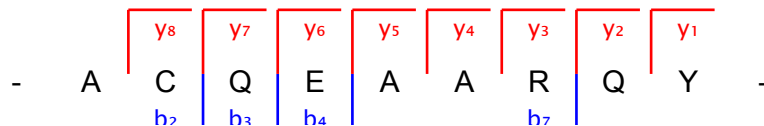

Raw file

Scan

Method

Score

m/z

Gene names

20150228\_yeast1\_Top\_opt\_B1\_01\_1611

6563

TOF; CID

52.6

606.24

ZRT3

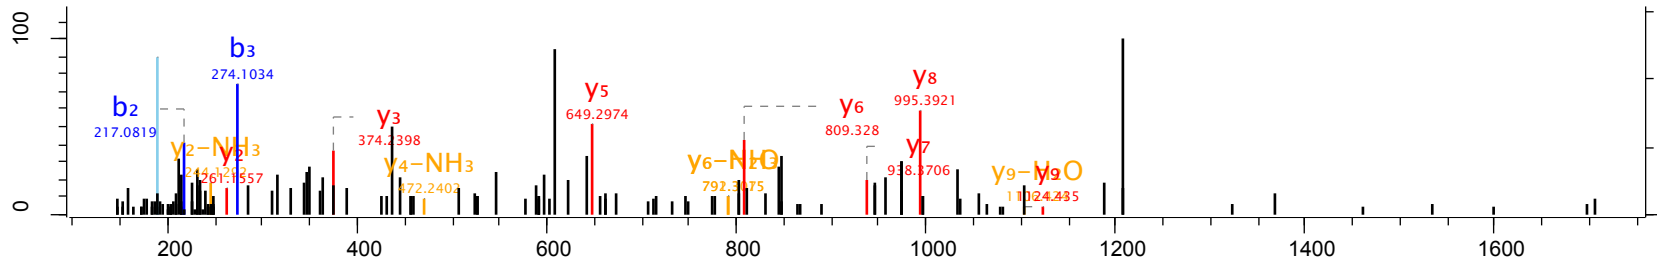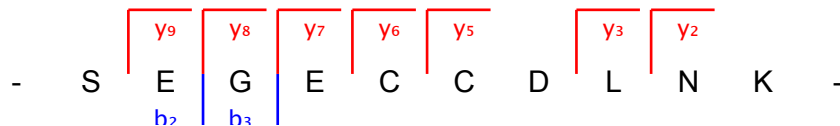

| Raw file                           | Scan | Method   | Score  | m/z    | Gene names |
|------------------------------------|------|----------|--------|--------|------------|
| 20150228_yeast1_Top_opt_B1_01_1611 | 6781 | TOF; CID | 102.52 | 648.76 | POP8       |

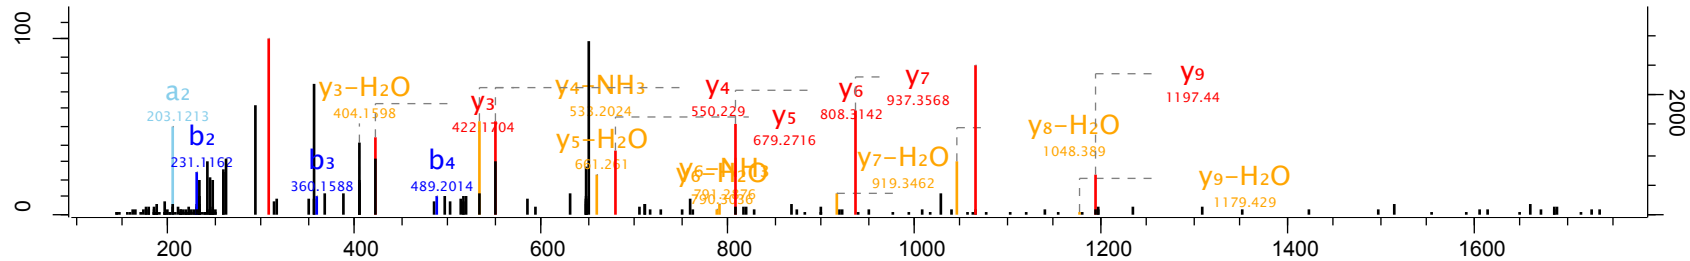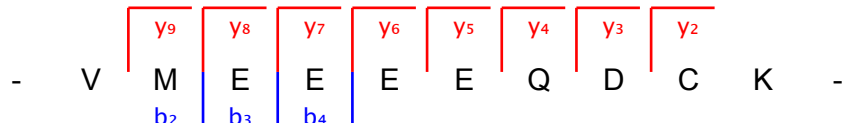

| Raw file                           | Scan | Method   | Score | m/z    | Gene names |
|------------------------------------|------|----------|-------|--------|------------|
| 20150228_yeast1_Top_opt_B1_01_1611 | 7924 | TOF; CID | 91.91 | 394.22 | NHP6A      |

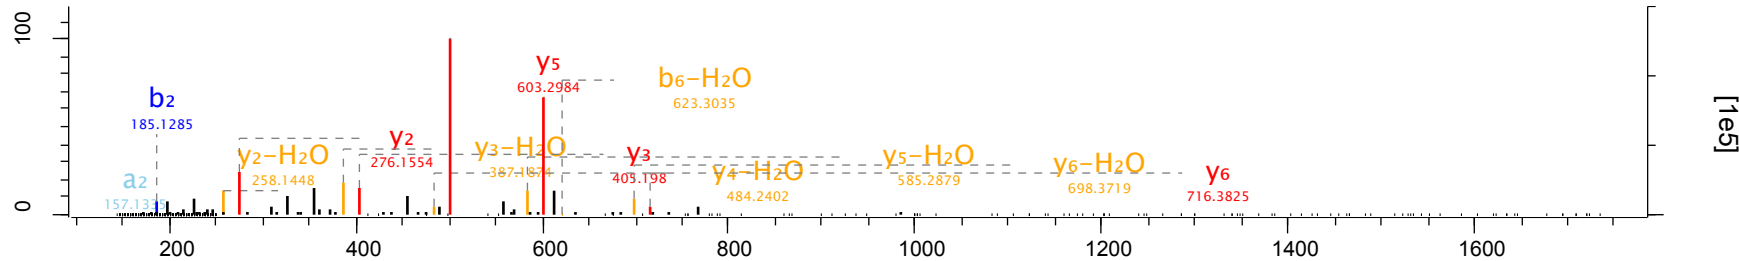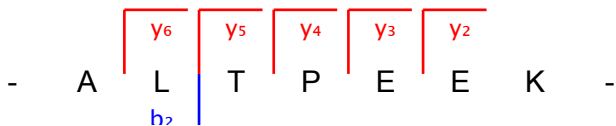

Raw file

Scan

Method

Score

m/z

20150228\_yeast1\_Top\_opt\_B1\_01\_1611

7969

TOF; CID

83.4

918.89

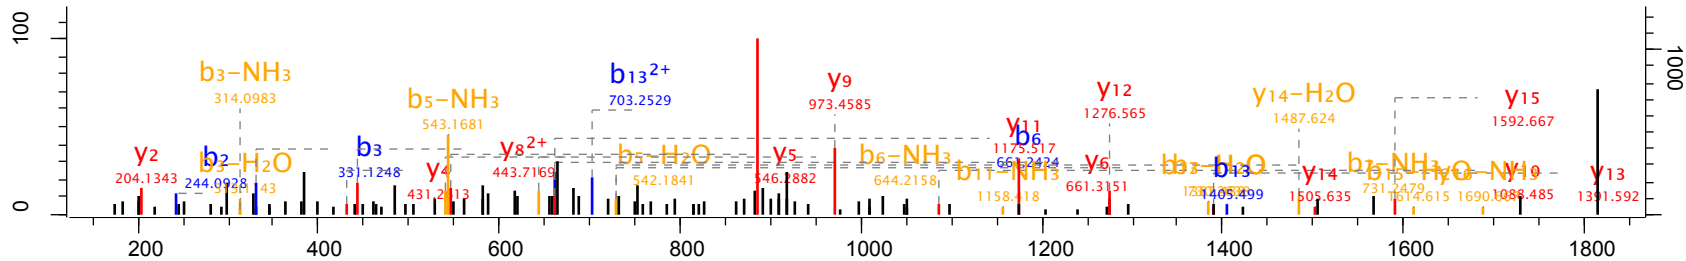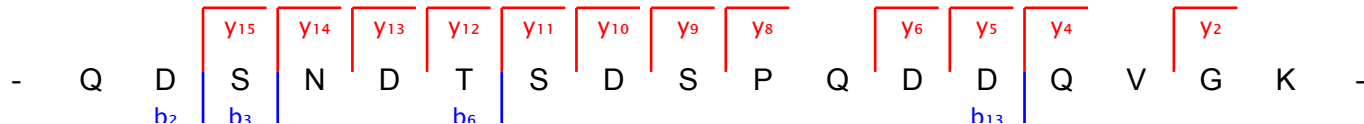

| Raw file                           | Scan | Method   | Score | m/z    | Gene names |
|------------------------------------|------|----------|-------|--------|------------|
| 20150228_yeast1_Top_opt_B1_01_1611 | 8484 | TOF; CID | 74.17 | 559.24 | RPC10      |

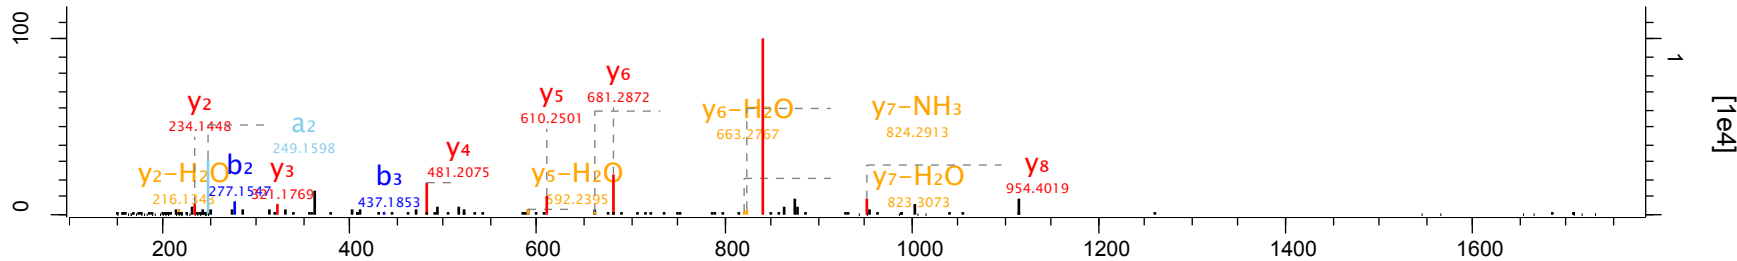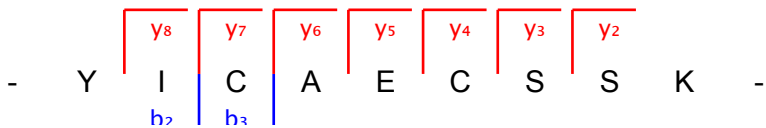

Raw file

Scan

Method

Score

m/z

Gene names

20150228\_yeast1\_Top\_opt\_B1\_01\_1611

9566

TOF; CID

69.63

493.74

RNH1

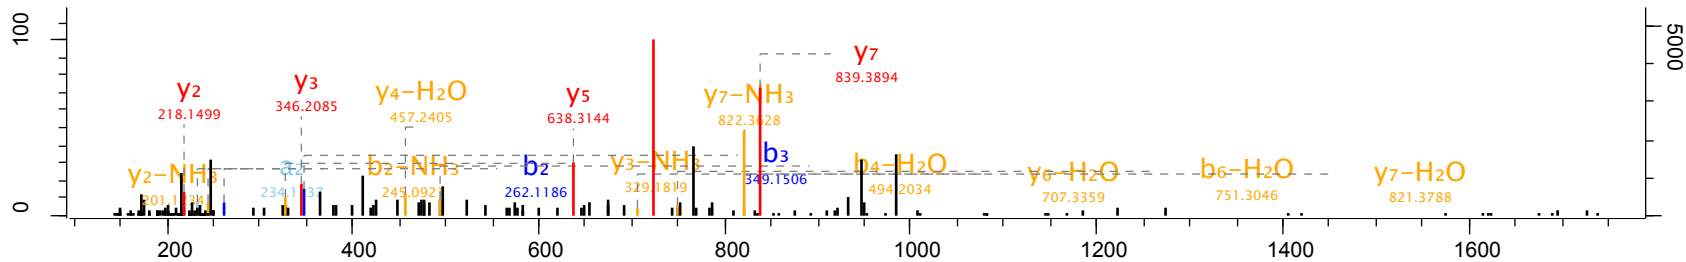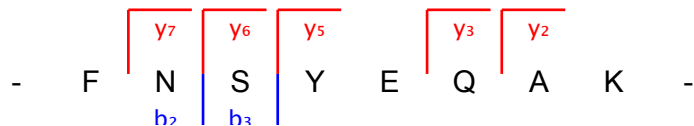



| Raw file                           | Scan  | Method   | Score | m/z    | Gene names |
|------------------------------------|-------|----------|-------|--------|------------|
| 20150228_yeast1_Top_opt_B1_01_1611 | 10377 | TOF; CID | 66.3  | 541.78 | TTI1       |

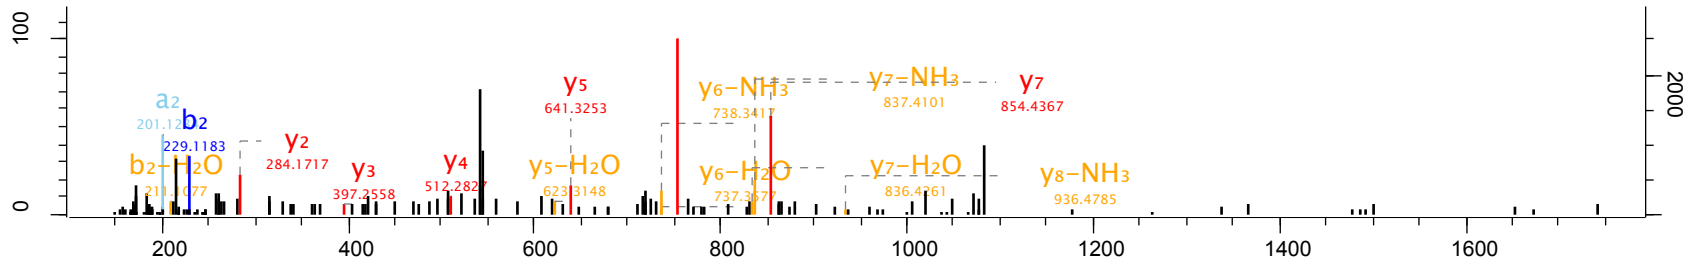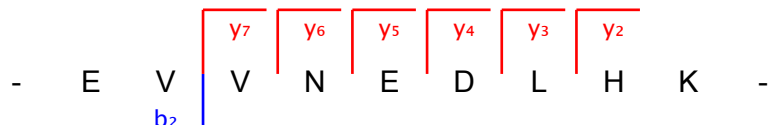

| Raw file                           | Scan  | Method   | Score | m/z   | Gene names |
|------------------------------------|-------|----------|-------|-------|------------|
| 20150228_yeast1_Top_opt_B1_01_1611 | 10556 | TOF; CID | 42.34 | 591.8 | SPG5       |

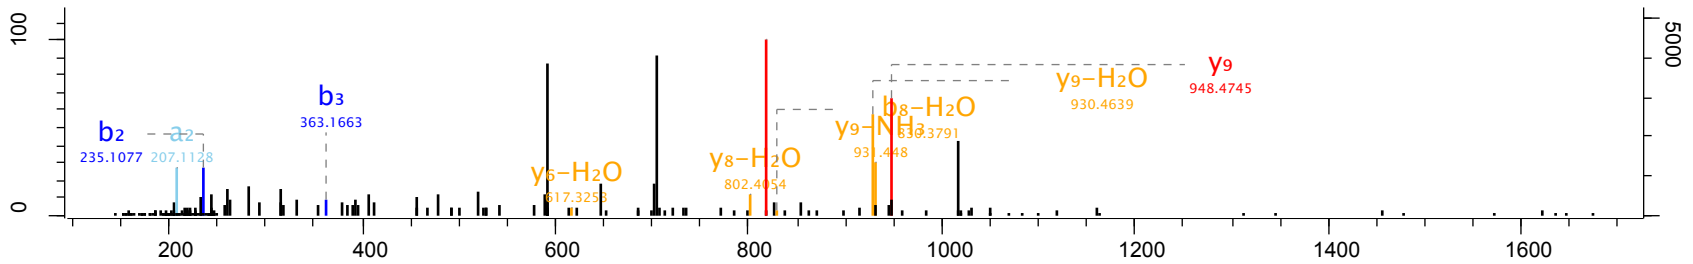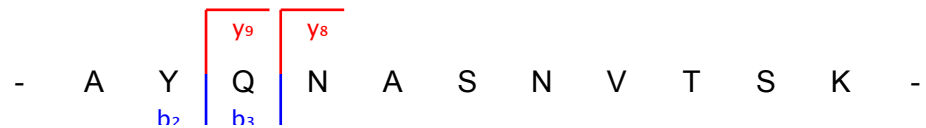

| Raw file                           | Scan  | Method   | Score | m/z   | Gene names |
|------------------------------------|-------|----------|-------|-------|------------|
| 20150228_yeast1_Top_opt_B1_01_1611 | 10560 | TOF; CID | 59.91 | 392.2 | CWC22      |

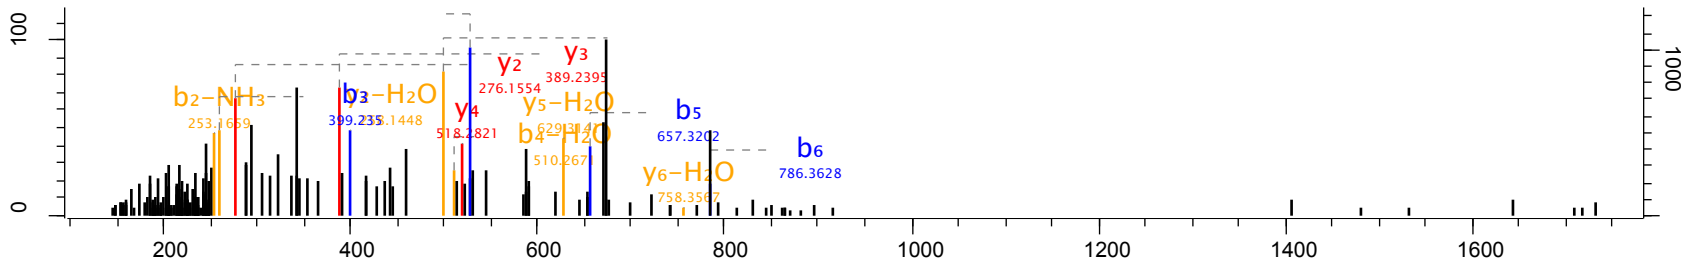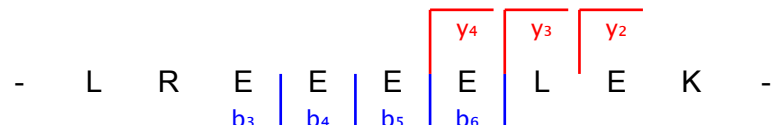

| Raw file                           | Scan  | Method   | Score | m/z    | Gene names |
|------------------------------------|-------|----------|-------|--------|------------|
| 20150228_yeast1_Top_opt_B1_01_1611 | 10607 | TOF; CID | 57.35 | 509.77 | EAF6       |

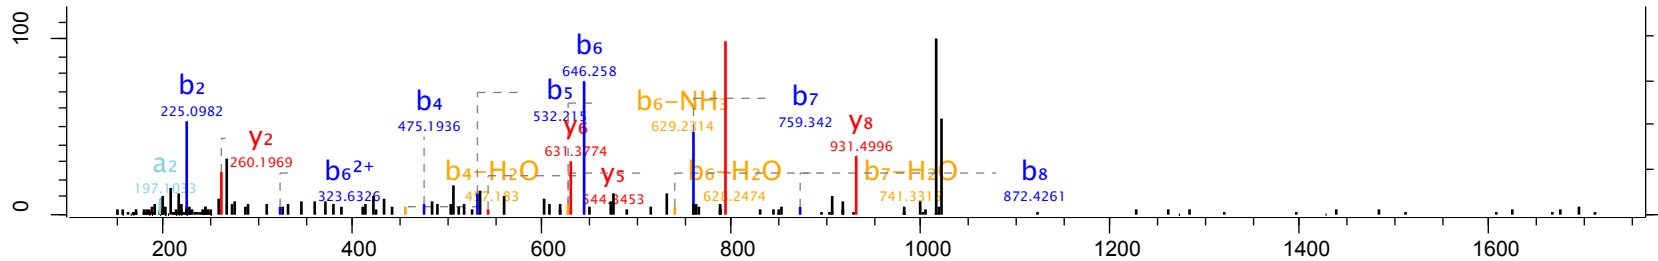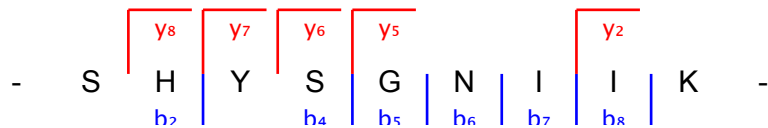

| Raw file                           | Scan  | Method   | Score | m/z    | Gene names |
|------------------------------------|-------|----------|-------|--------|------------|
| 20150228_yeast1_Top_opt_B1_01_1611 | 10651 | TOF; CID | 70.09 | 625.31 | ATO3       |

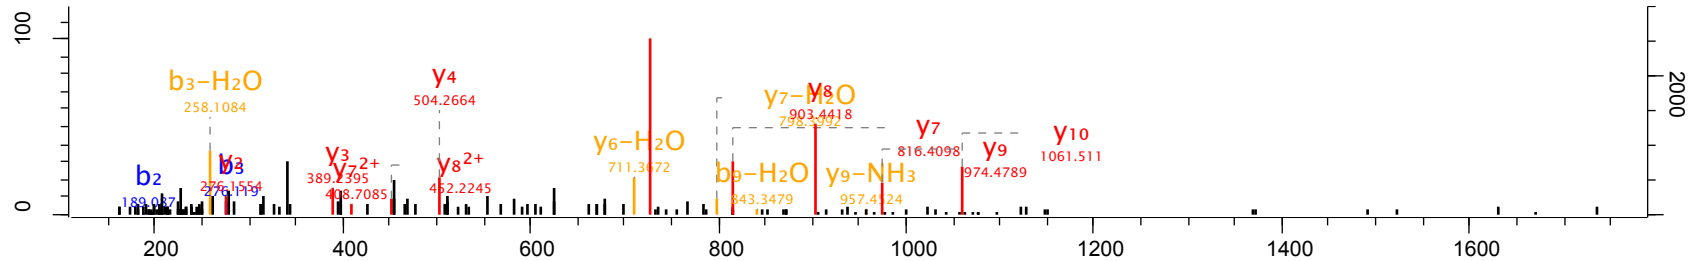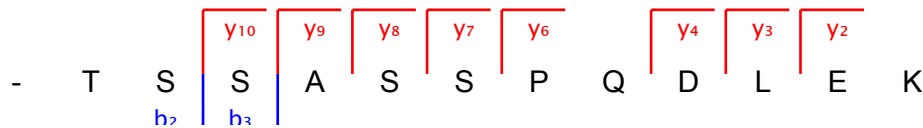

| Raw file                           | Scan  | Method   | Score | m/z    | Gene names |
|------------------------------------|-------|----------|-------|--------|------------|
| 20150228_yeast1_Top_opt_B1_01_1611 | 10673 | TOF; CID | 73.26 | 451.23 | RPS29B     |

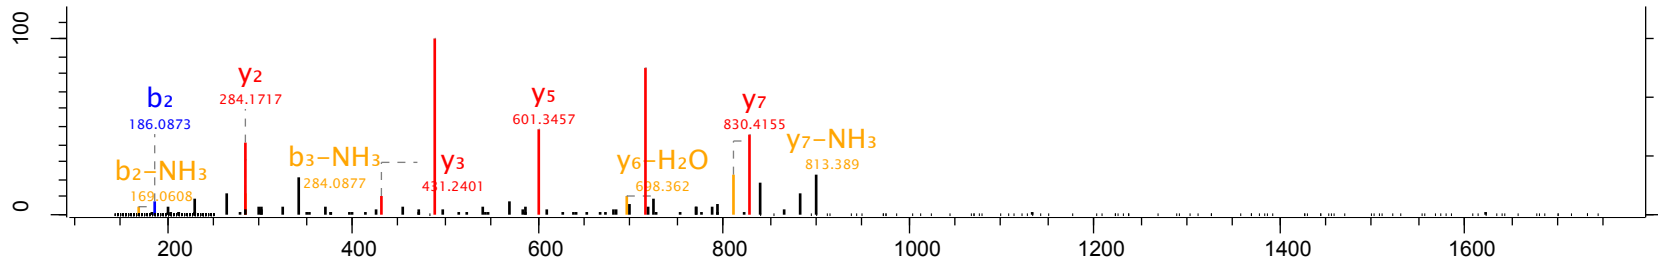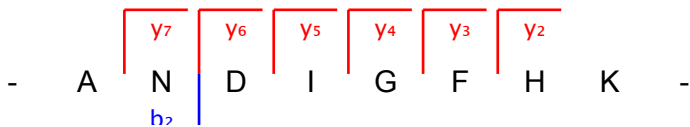

[1e5]

| Raw file                           | Scan  | Method   | Score | m/z    | Gene names |
|------------------------------------|-------|----------|-------|--------|------------|
| 20150228_yeast1_Top_opt_B1_01_1611 | 10970 | TOF; CID | 68.66 | 497.75 | FOB1       |

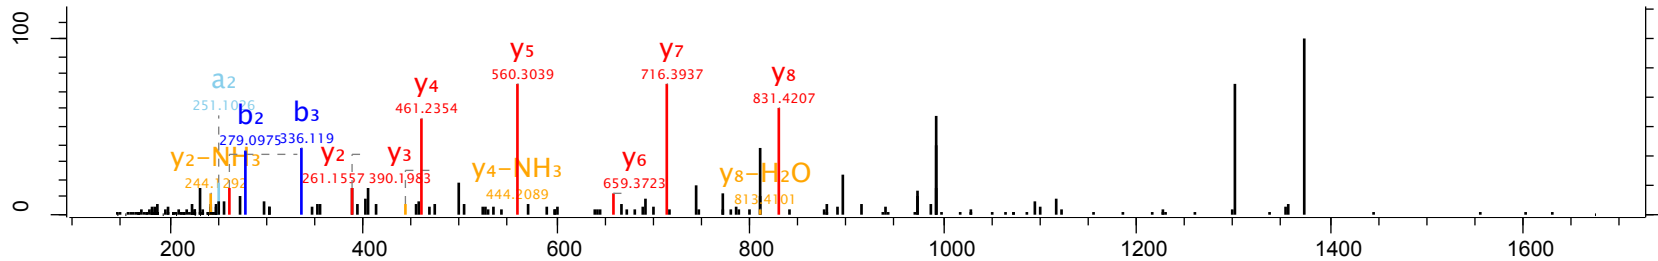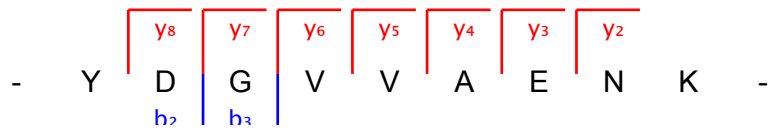

| Raw file                           | Scan  | Method   | Score | m/z    | Gene names |
|------------------------------------|-------|----------|-------|--------|------------|
| 20150228_yeast1_Top_opt_B1_01_1611 | 11214 | TOF; CID | 74.42 | 372.72 | SFT1       |

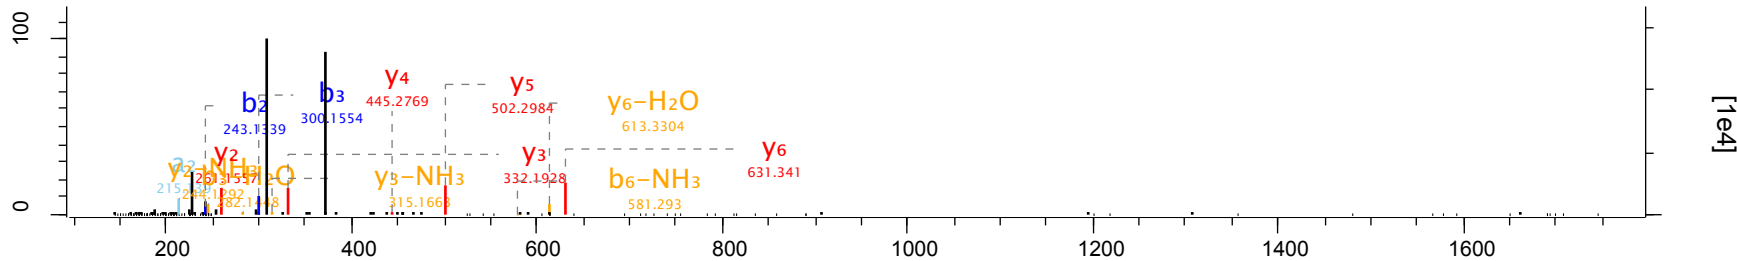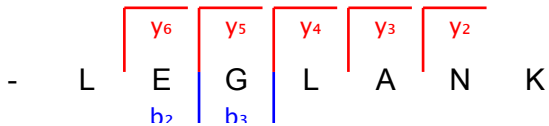



| Raw file                           | Scan  | Method   | Score | m/z    | Gene names |
|------------------------------------|-------|----------|-------|--------|------------|
| 20150228_yeast1_Top_opt_B1_01_1611 | 11564 | TOF; CID | 87.18 | 593.81 | UME6       |

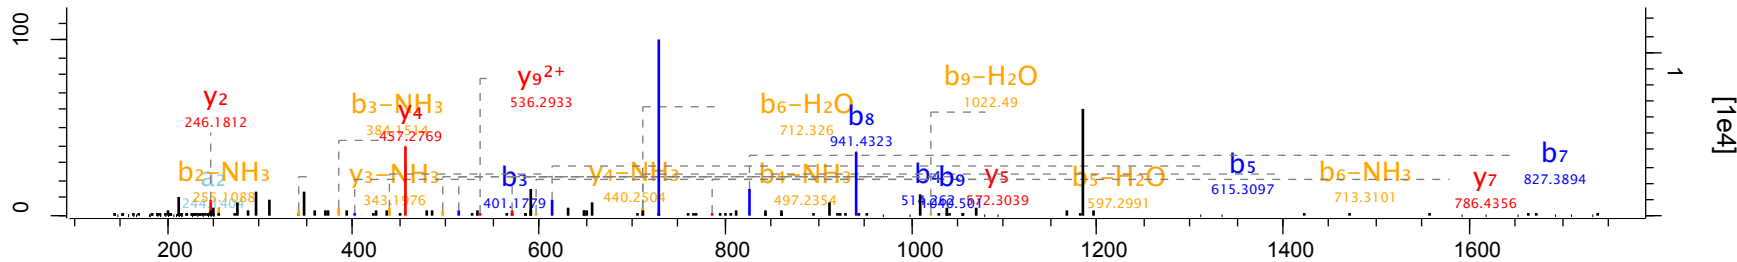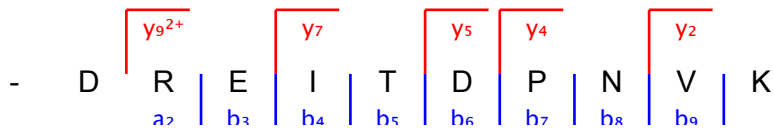

| Raw file                           | Scan  | Method   | Score | m/z    | Gene names |
|------------------------------------|-------|----------|-------|--------|------------|
| 20150228_yeast1_Top_opt_B1_01_1611 | 11735 | TOF; CID | 68.66 | 499.25 | YPR098C    |

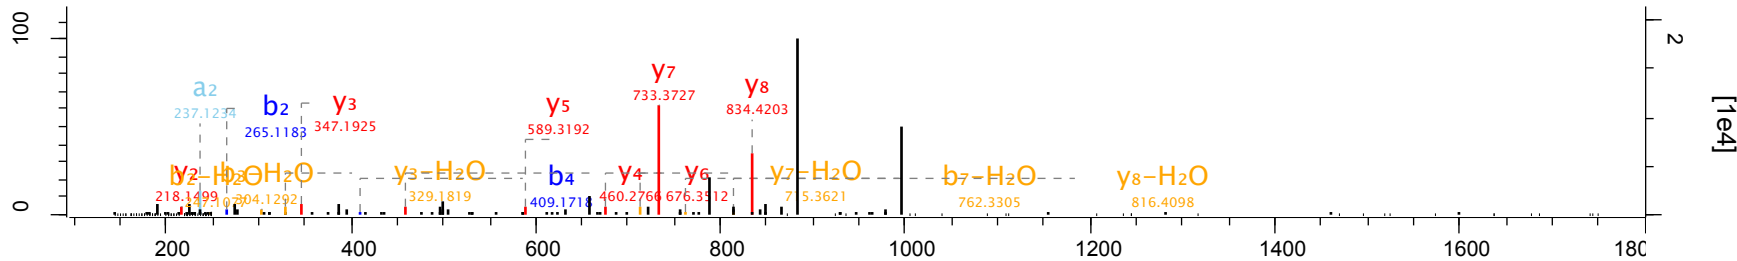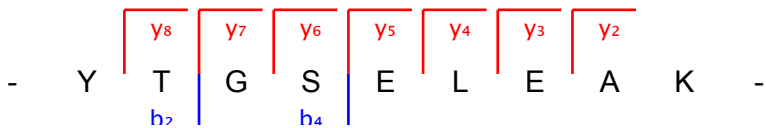

Raw file

Scan

Method

Score

m/z

Gene names

20150228\_yeast1\_Top\_opt\_B1\_01\_1611

12326

TOF; CID

137.81

954.42

DAD2

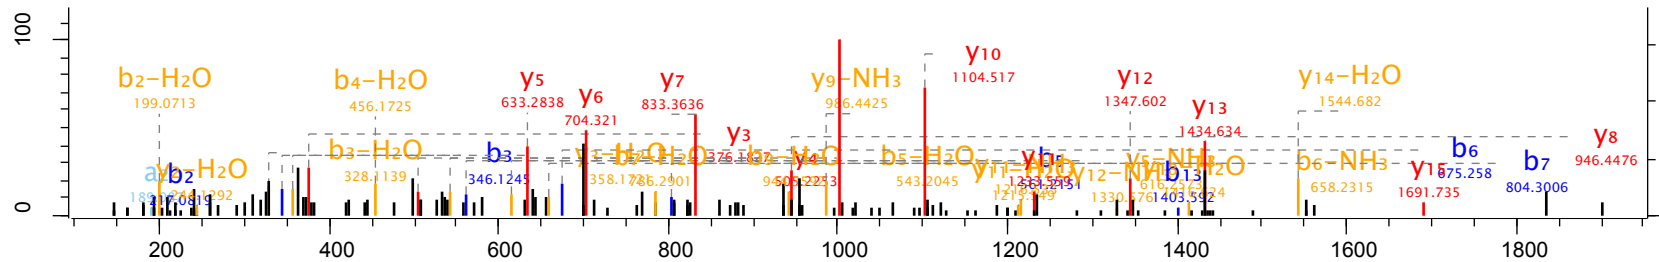

- E S E Q S N E T G L E A Q E N D K -

b<sub>2</sub> y<sub>15</sub> b<sub>3</sub> y<sub>13</sub> y<sub>12</sub> y<sub>11</sub> y<sub>10</sub> y<sub>9</sub> y<sub>8</sub> y<sub>7</sub> y<sub>6</sub> y<sub>5</sub> y<sub>4</sub> y<sub>3</sub>  
b<sub>7</sub> b<sub>6</sub> b<sub>7</sub> b<sub>13</sub>

| Raw file                           | Scan  | Method   | Score | m/z    | Gene names |
|------------------------------------|-------|----------|-------|--------|------------|
| 20150228_yeast1_Top_opt_B1_01_1611 | 12738 | TOF; CID | 58.31 | 664.81 | ESA1       |

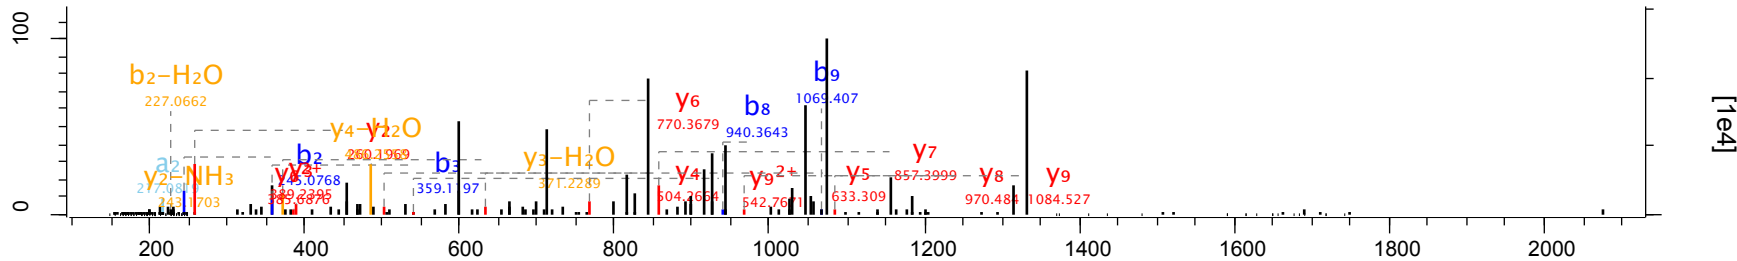

- D E N I S H E D E I K -

b<sub>2</sub> b<sub>3</sub> y<sub>9</sub> y<sub>8</sub> y<sub>7</sub> y<sub>6</sub> y<sub>5</sub> y<sub>4</sub> y<sub>3</sub> y<sub>2</sub>  
b<sub>2</sub> b<sub>3</sub> b<sub>8</sub> b<sub>9</sub>

| Raw file                           | Scan  | Method   | Score | m/z    | Gene names    |
|------------------------------------|-------|----------|-------|--------|---------------|
| 20150228_yeast1_Top_opt_B1_01_1611 | 13337 | TOF; CID | 85.36 | 365.23 | RPS28A;RPS28B |

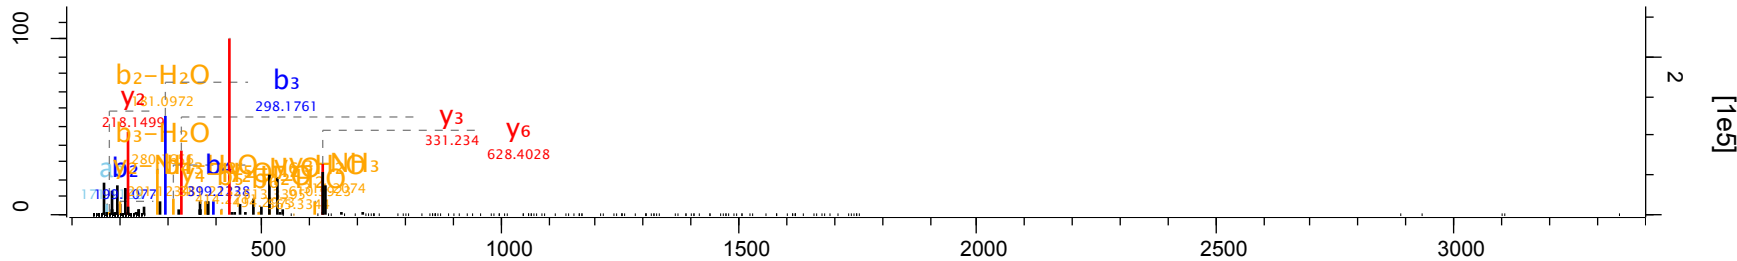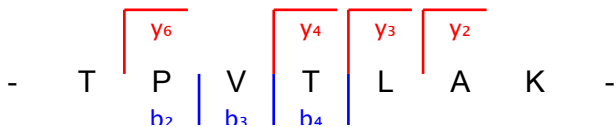

| Raw file                           | Scan  | Method   | Score | m/z   | Gene names |
|------------------------------------|-------|----------|-------|-------|------------|
| 20150228_yeast1_Top_opt_B1_01_1611 | 13404 | TOF; CID | 41.88 | 372.2 | SED4       |

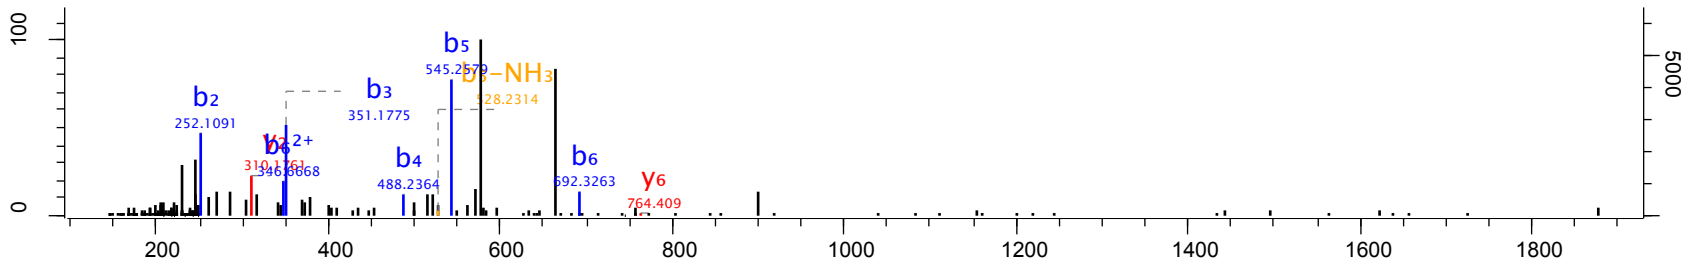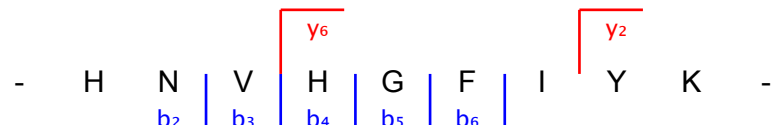

| Raw file                           | Scan  | Method   | Score | m/z    |
|------------------------------------|-------|----------|-------|--------|
| 20150228_yeast1_Top_opt_B1_01_1611 | 13524 | TOF; CID | 64.71 | 522.26 |

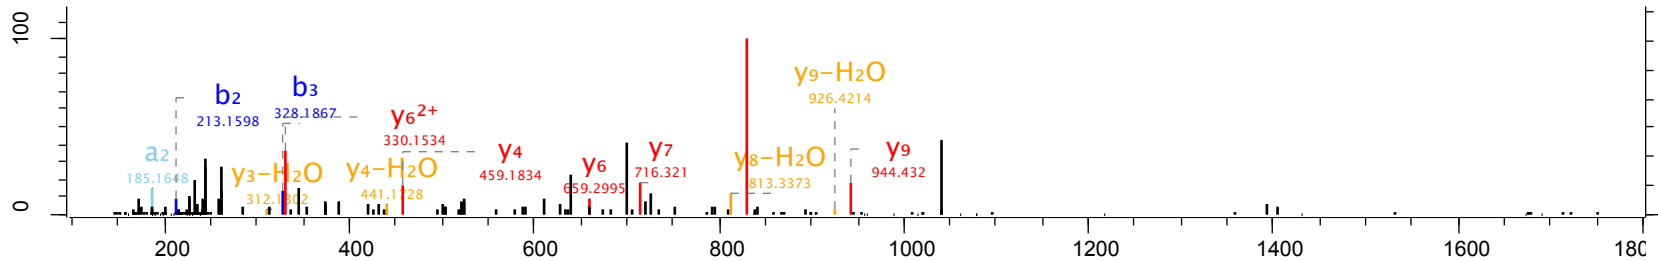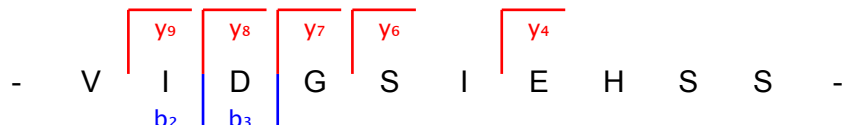

| Raw file                           | Scan  | Method   | Score | m/z    | Gene names |
|------------------------------------|-------|----------|-------|--------|------------|
| 20150228_yeast1_Top_opt_B1_01_1611 | 13593 | TOF; CID | 67.7  | 543.26 | PRY3       |

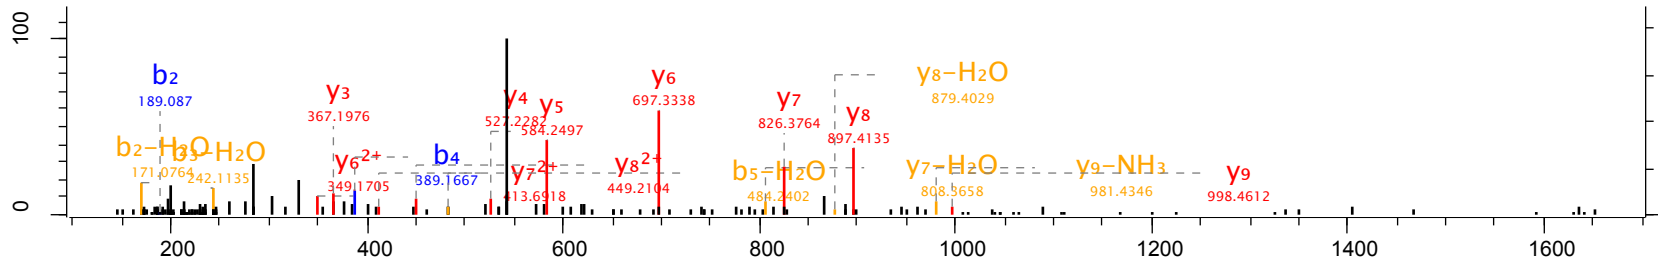

- S T A E I G C G Y K -  
   b<sub>2</sub>   b<sub>4</sub>

y<sub>9</sub> y<sub>8</sub> y<sub>7</sub> y<sub>6</sub> y<sub>5</sub> y<sub>4</sub> y<sub>3</sub>



Raw file

20150228\_yeast1\_Top\_opt\_B1\_01\_1611

Scan

14358

Method

TOF; CID

Score

56.88

m/z

737.67

Gene names

TRS85

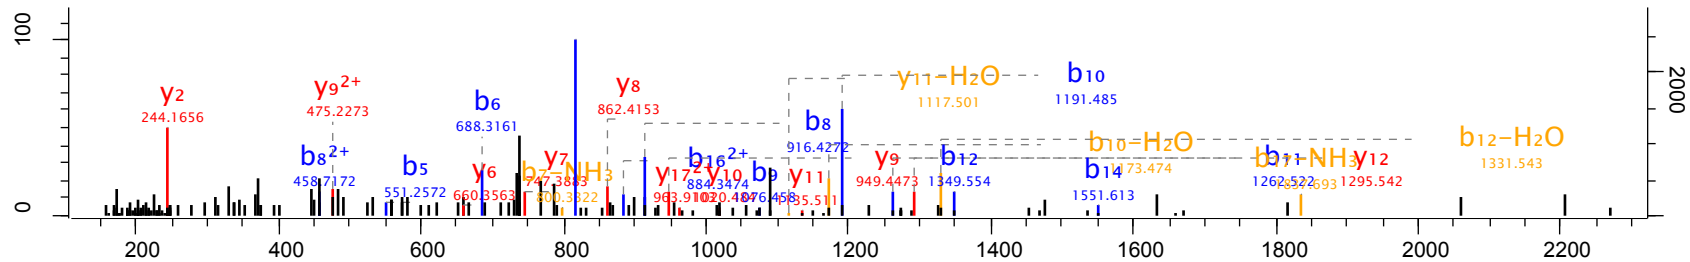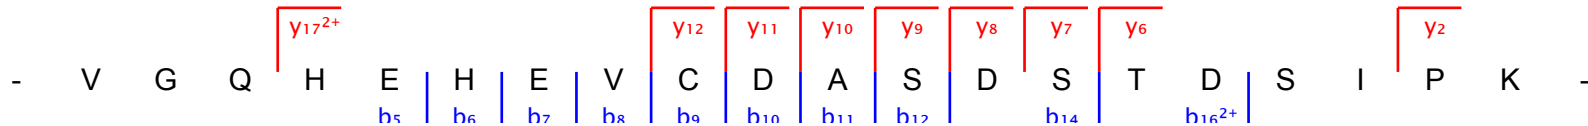

| Raw file                           | Scan  | Method   | Score | m/z    | Gene names |
|------------------------------------|-------|----------|-------|--------|------------|
| 20150228_yeast1_Top_opt_B1_01_1611 | 14406 | TOF; CID | 76.06 | 462.26 | ISA1       |

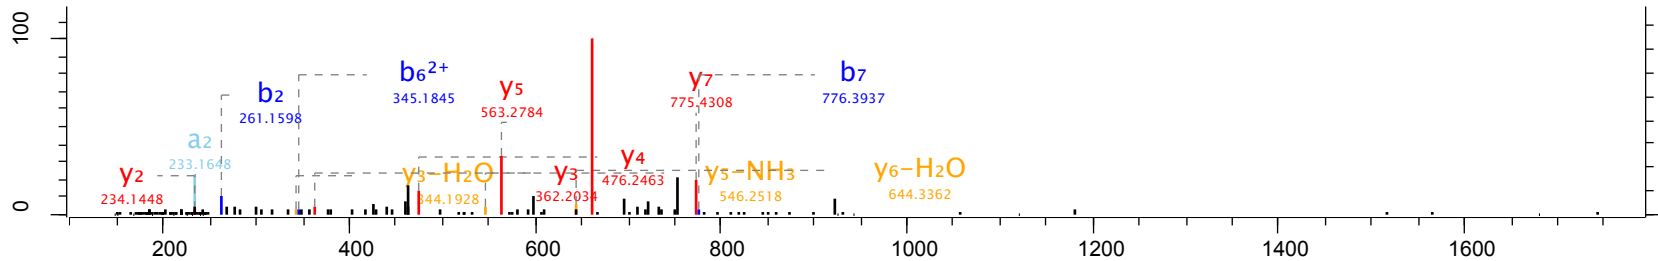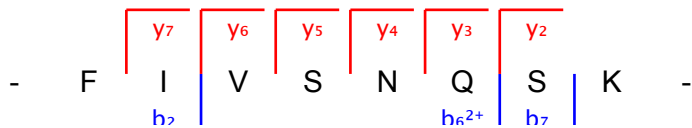

| Raw file                           | Scan  | Method   | Score | m/z    | Gene names |
|------------------------------------|-------|----------|-------|--------|------------|
| 20150228_yeast1_Top_opt_B1_01_1611 | 14502 | TOF; CID | 65.84 | 630.36 | TVP38      |

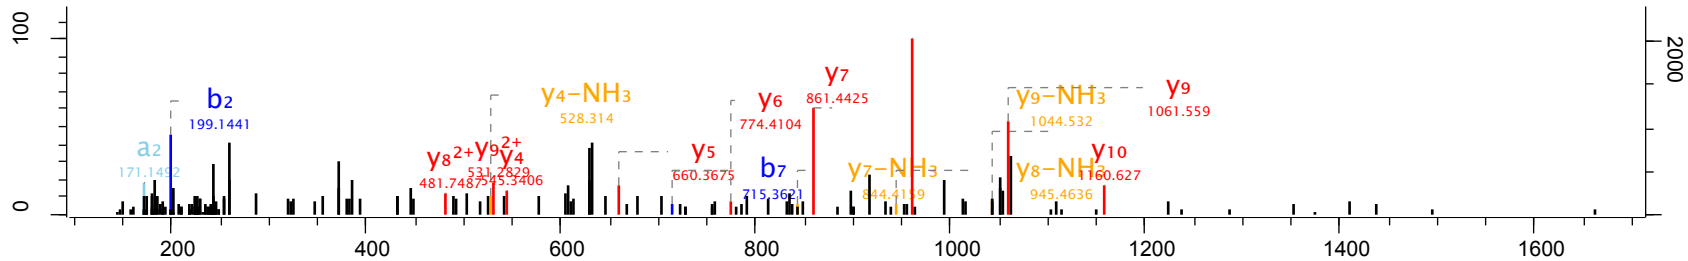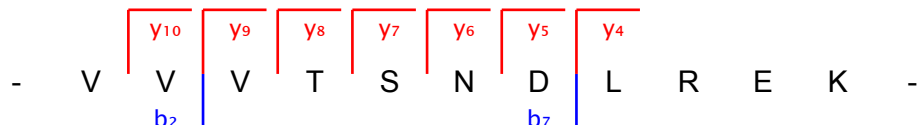

| Raw file                           | Scan  | Method   | Score | m/z    | Gene names |
|------------------------------------|-------|----------|-------|--------|------------|
| 20150228_yeast1_Top_opt_B1_01_1611 | 14534 | TOF; CID | 60.6  | 587.32 | PIB1       |

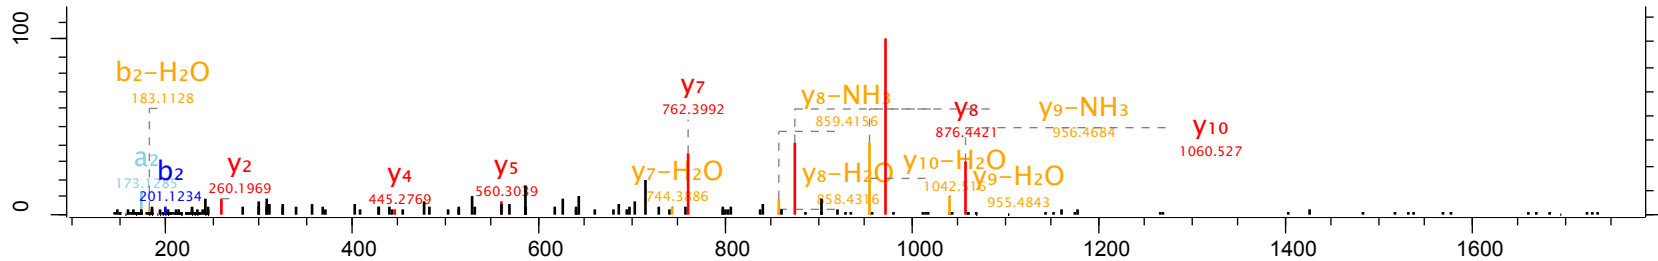

- I S P N T T D N A I K -  
 b<sub>2</sub> | y<sub>10</sub> | y<sub>9</sub> | y<sub>8</sub> | y<sub>7</sub> | y<sub>5</sub> | y<sub>4</sub> | y<sub>2</sub>

| Raw file                           | Scan  | Method   | Score | m/z   | Gene names |
|------------------------------------|-------|----------|-------|-------|------------|
| 20150228_yeast1_Top_opt_B1_01_1611 | 14693 | TOF; CID | 65.84 | 595.3 | YML037C    |

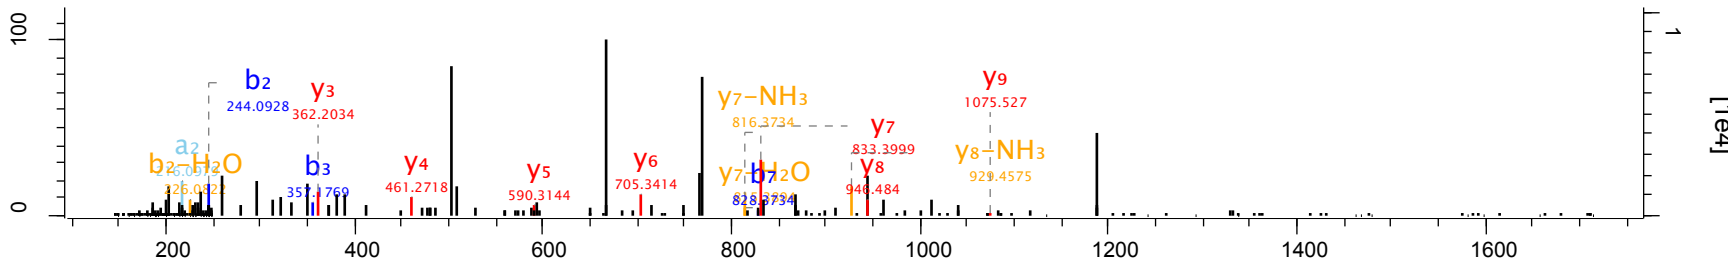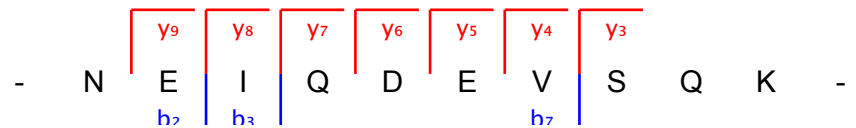

| Raw file                           | Scan  | Method   | Score | m/z    | Gene names |
|------------------------------------|-------|----------|-------|--------|------------|
| 20150228_yeast1_Top_opt_B1_01_1611 | 14993 | TOF; CID | 93.99 | 439.73 | RPS29A     |

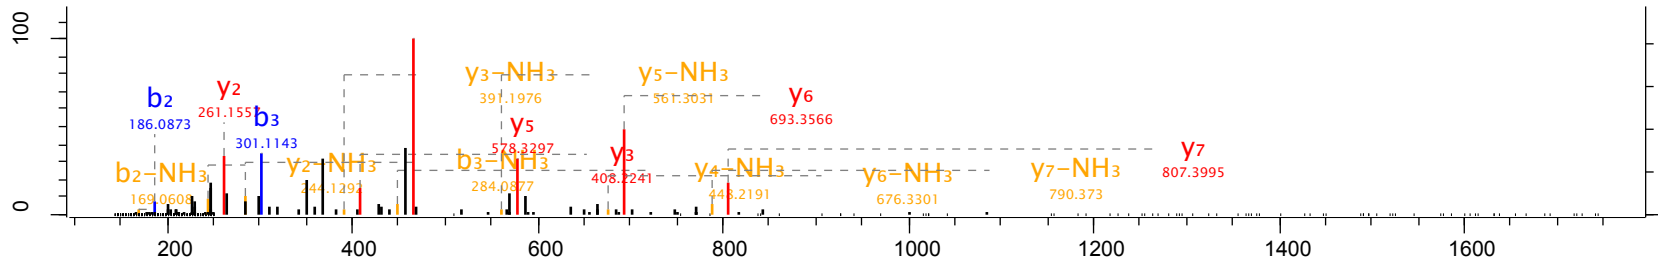

[1e4]

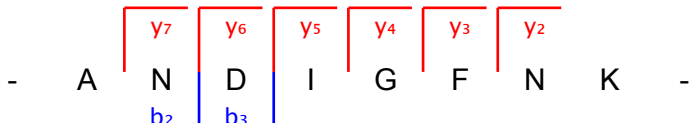

| Raw file                           | Scan  | Method   | Score | m/z    | Gene names |
|------------------------------------|-------|----------|-------|--------|------------|
| 20150228_yeast1_Top_opt_B1_01_1611 | 15612 | TOF; CID | 60.02 | 405.72 | CDC43      |

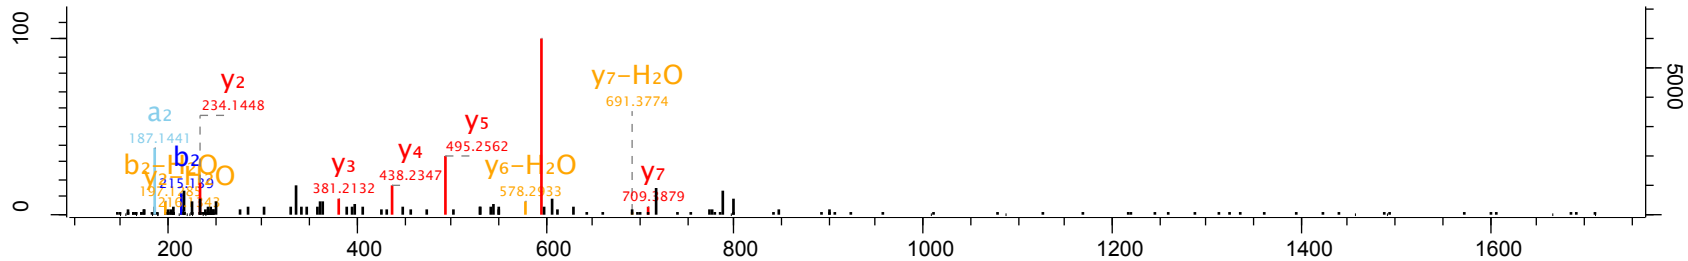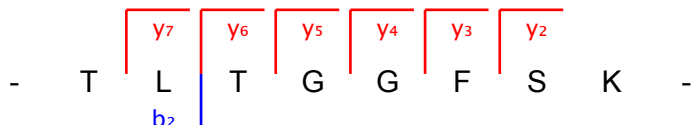

| Raw file                           | Scan  | Method   | Score | m/z    | Gene names |
|------------------------------------|-------|----------|-------|--------|------------|
| 20150228_yeast1_Top_opt_B1_01_1611 | 16009 | TOF; CID | 41.74 | 888.94 | AFI1       |

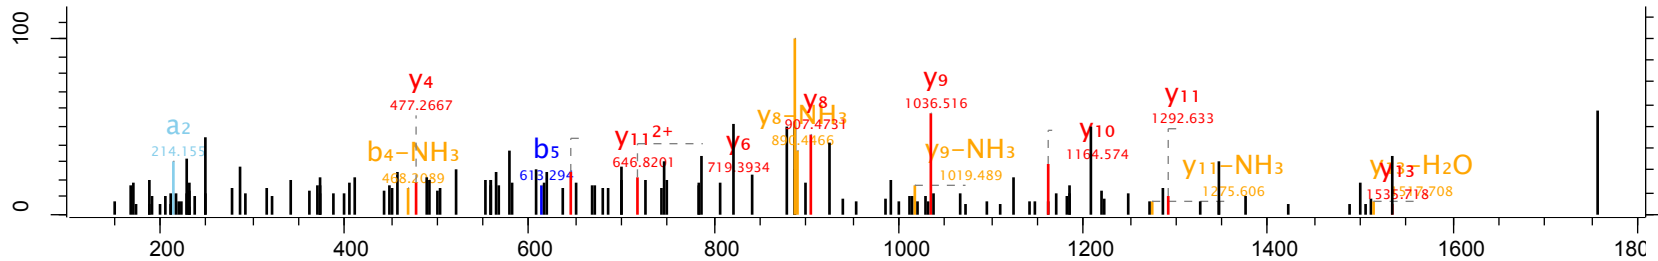

- Q I N E Q Q E S T L E T T Q K -  
 a<sub>2</sub> b<sub>5</sub> y<sub>13</sub> y<sub>11</sub> y<sub>10</sub> y<sub>9</sub> y<sub>8</sub> y<sub>6</sub> y<sub>4</sub>



| Raw file                           | Scan  | Method   | Score | m/z    | Gene names |
|------------------------------------|-------|----------|-------|--------|------------|
| 20150228_yeast1_Top_opt_B1_01_1611 | 16153 | TOF; CID | 71.45 | 459.77 | RIT1       |

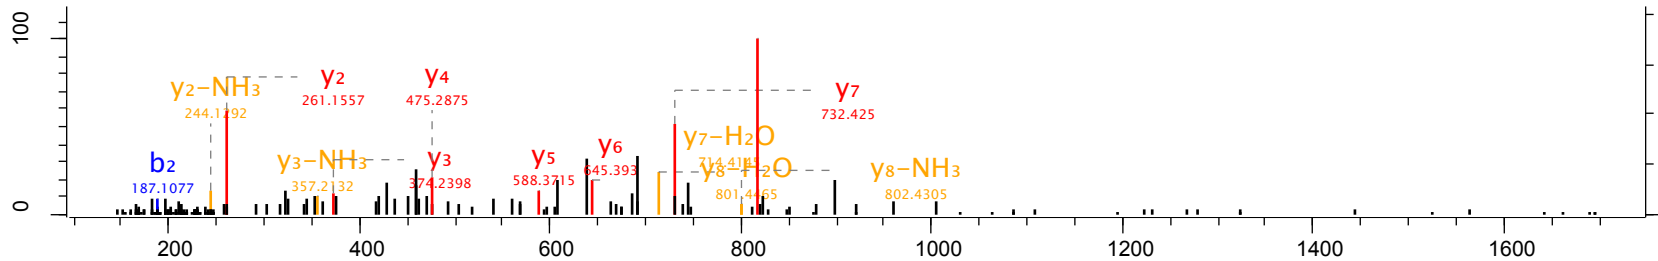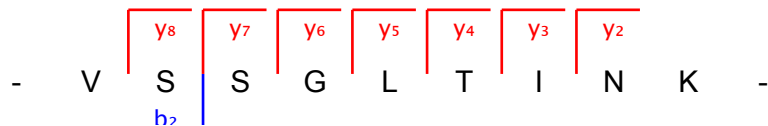

| Raw file                           | Scan  | Method   | Score | m/z    | Gene names |
|------------------------------------|-------|----------|-------|--------|------------|
| 20150228_yeast1_Top_opt_B1_01_1611 | 16338 | TOF; CID | 50.47 | 501.29 | BOR1       |

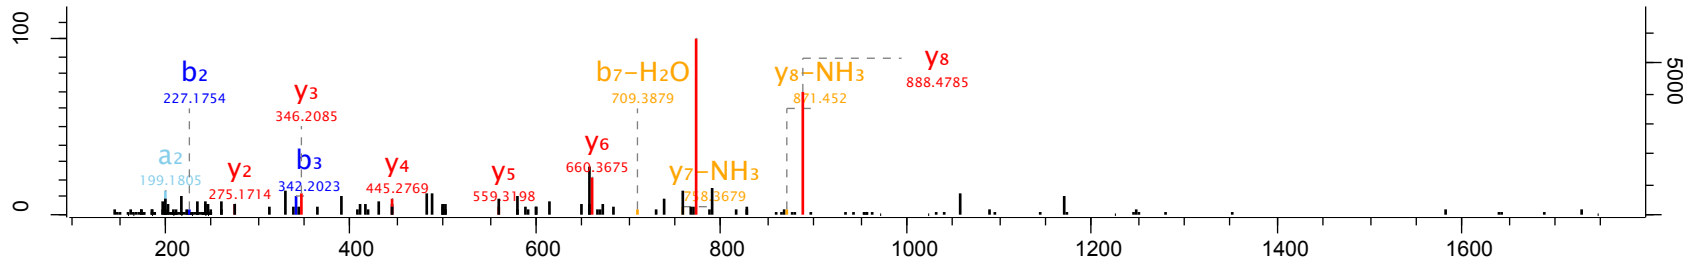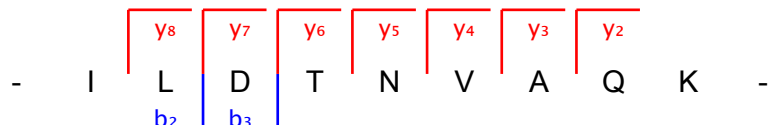

| Raw file                           | Scan  | Method   | Score | m/z    | Gene names |
|------------------------------------|-------|----------|-------|--------|------------|
| 20150228_yeast1_Top_opt_B1_01_1611 | 16590 | TOF; CID | 78.81 | 701.36 | ARG80      |

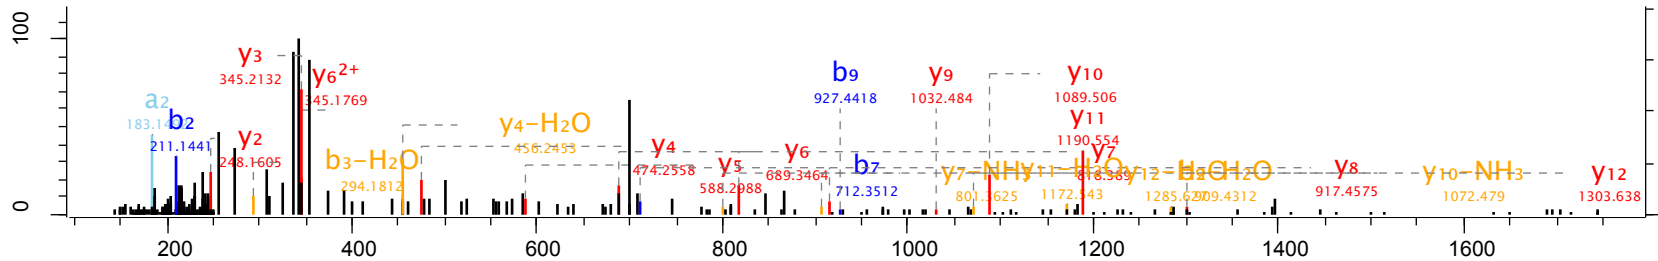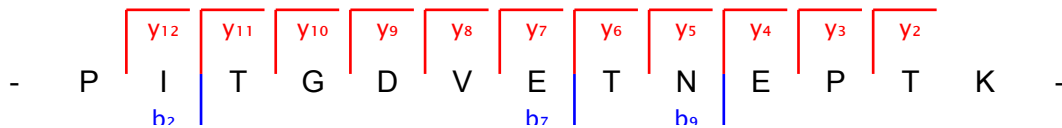

| Raw file                           | Scan  | Method   | Score | m/z    | Gene names |
|------------------------------------|-------|----------|-------|--------|------------|
| 20150228_yeast1_Top_opt_B1_01_1611 | 16897 | TOF; CID | 85.53 | 567.77 | APM4       |

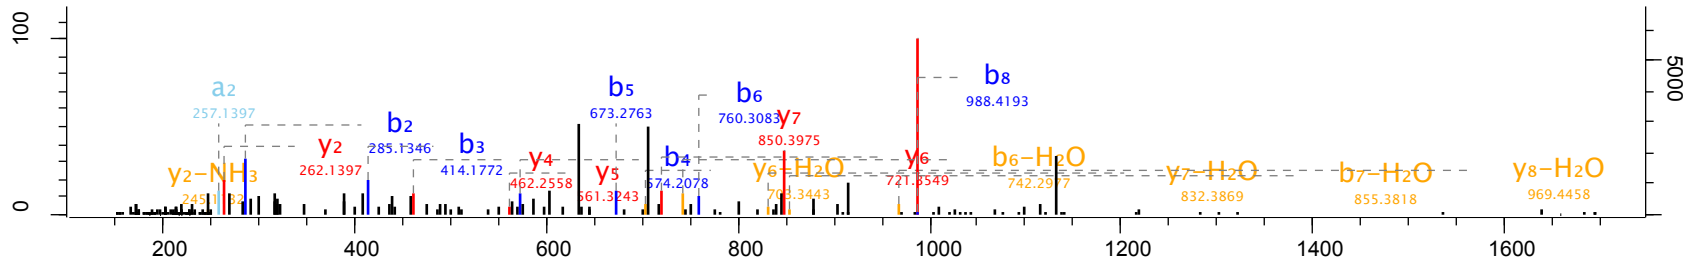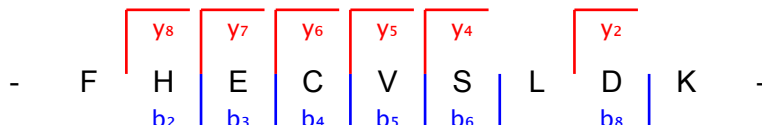

| Raw file                           | Scan  | Method   | Score | m/z    | Gene names |
|------------------------------------|-------|----------|-------|--------|------------|
| 20150228_yeast1_Top_opt_B1_01_1611 | 17110 | TOF; CID | 52.26 | 481.26 | ICT1       |

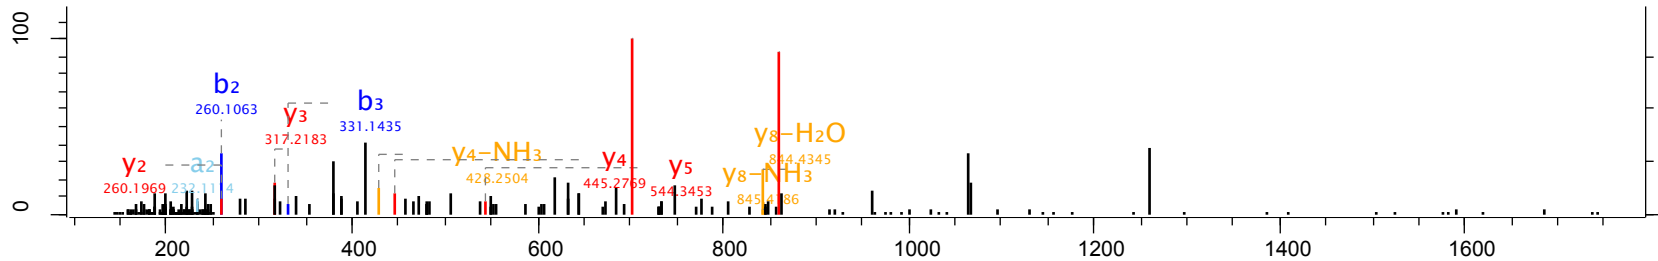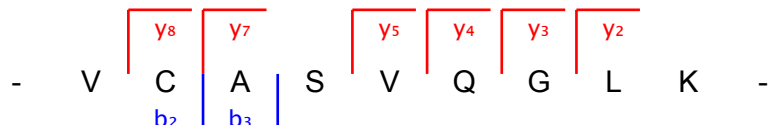

| Raw file                           | Scan  | Method   | Score | m/z    | Gene names |
|------------------------------------|-------|----------|-------|--------|------------|
| 20150228_yeast1_Top_opt_B1_01_1611 | 17923 | TOF; CID | 47.82 | 677.32 | MET1       |

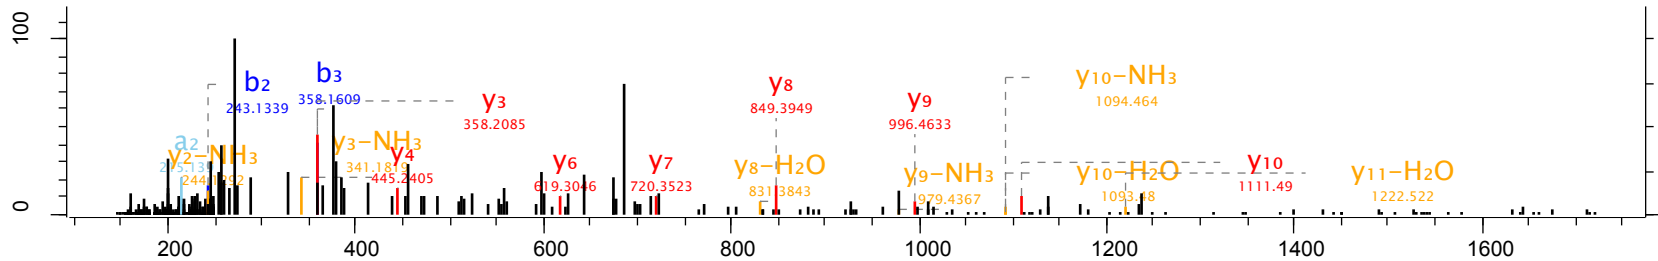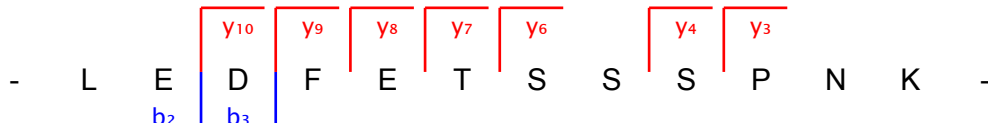

| Raw file                           | Scan  | Method   | Score | m/z    | Gene names |
|------------------------------------|-------|----------|-------|--------|------------|
| 20150228_yeast1_Top_opt_B1_01_1611 | 18075 | TOF; CID | 82.42 | 582.79 | ENV7       |

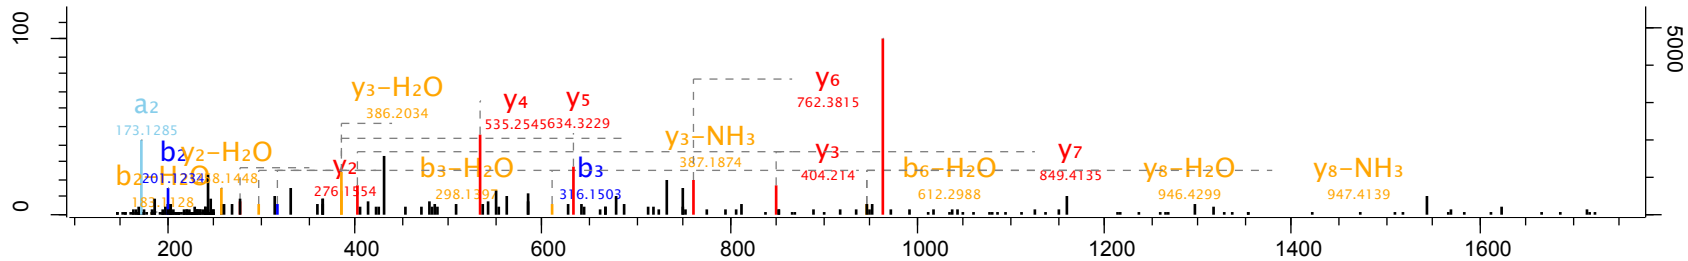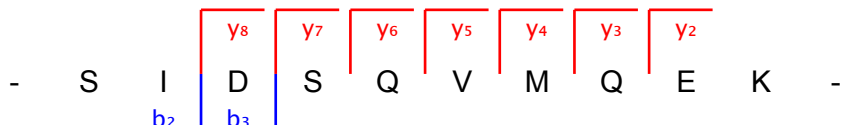

Raw file

Scan

Method

Score

m/z

20150228\_yeast1\_Top\_opt\_B1\_01\_1611

19248

TOF; CID

55.72

687.8

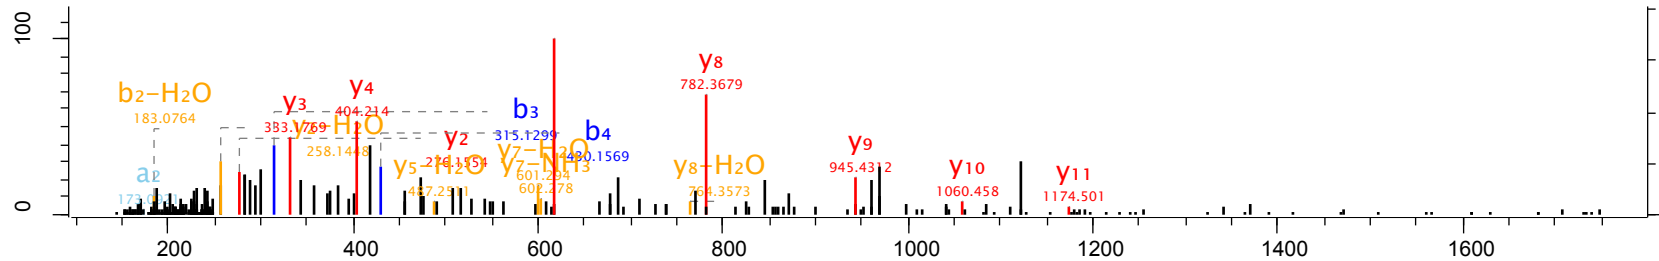

ac

- S A N D Y Y G G T A G E K -

a<sub>2</sub>b<sub>3</sub>b<sub>4</sub>y<sub>11</sub>y<sub>10</sub>y<sub>9</sub>y<sub>8</sub>y<sub>7</sub>y<sub>4</sub>y<sub>3</sub>y<sub>2</sub>



Raw file

Scan

Method

Score

m/z

Gene names

20150228\_yeast1\_Top\_opt\_B1\_01\_1611

19983

TOF; CID

139.86

612.3

HYM1

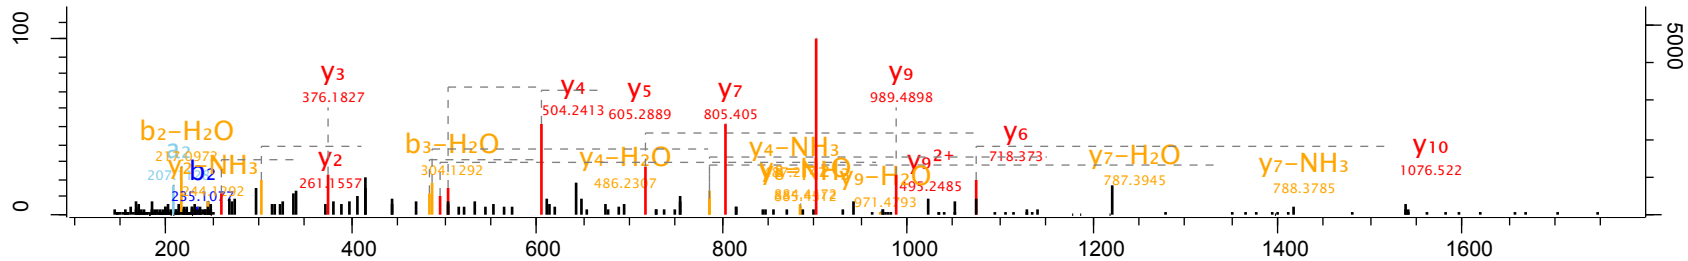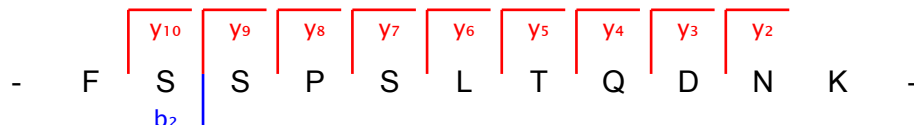

| Raw file                           | Scan  | Method   | Score | m/z    | Gene names |
|------------------------------------|-------|----------|-------|--------|------------|
| 20150228_yeast1_Top_opt_B1_01_1611 | 20020 | TOF; CID | 85.81 | 608.29 | TRS31      |

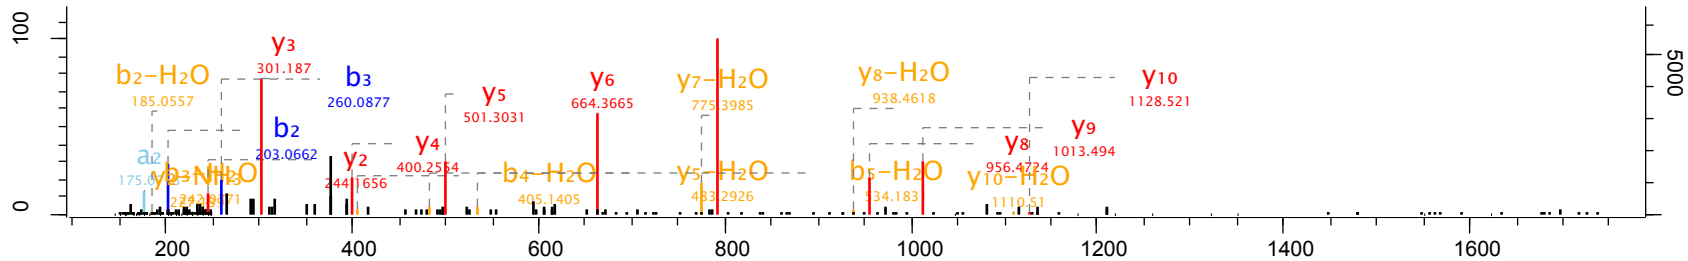

- S ┌ y10 └ ┌ y9 └ ┌ y8 └ ┌ y7 └ ┌ y6 └ ┌ y5 └ ┌ y4 └ ┌ y3 └ ┌ y2 └ -  
 - S D G Y E Y T V G P K -  
└ b2 └ └ b3

Raw file

Scan

Method

Score

m/z

20150228\_yeast1\_Top\_opt\_B1\_01\_1611

20061

TOF; CID

78.69

791.33

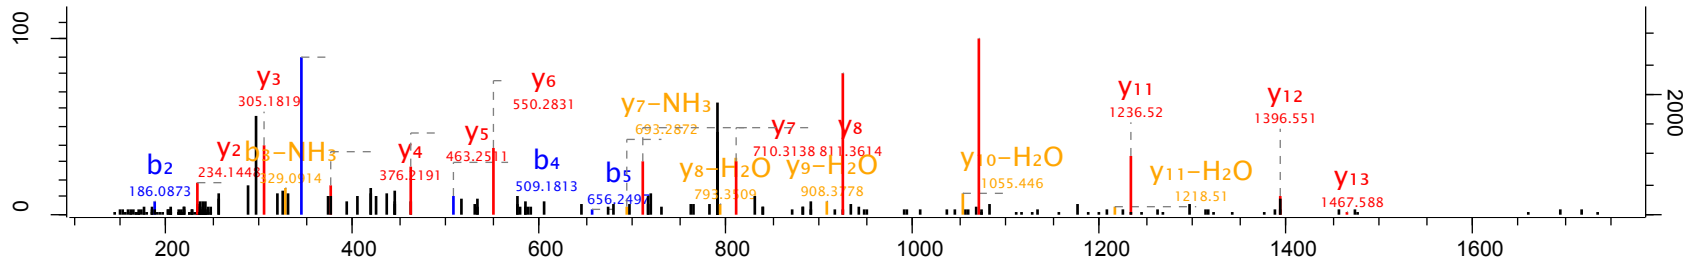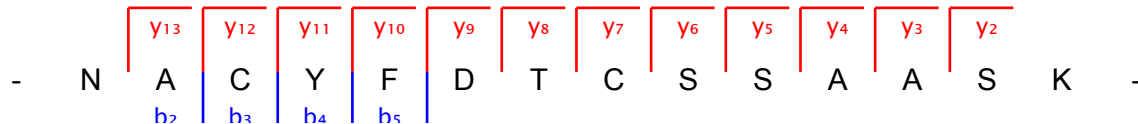

| Raw file                           | Scan  | Method   | Score | m/z    | Gene names |
|------------------------------------|-------|----------|-------|--------|------------|
| 20150228_yeast1_Top_opt_B1_01_1611 | 20883 | TOF; CID | 99.34 | 601.33 | QDR3       |

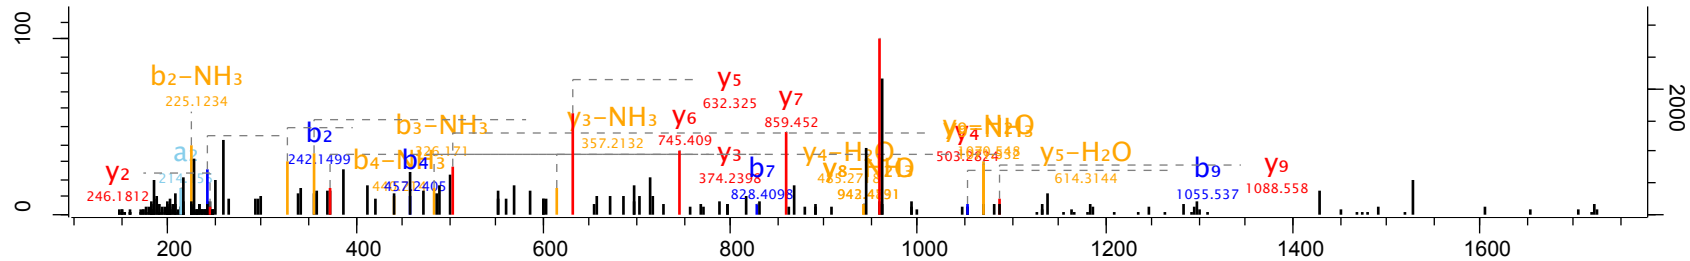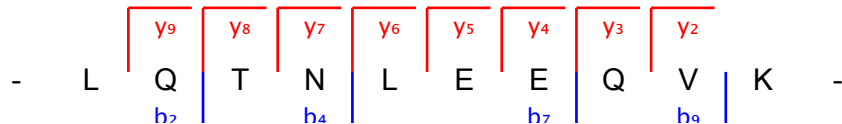

| Raw file                           | Scan  | Method   | Score | m/z    | Gene names |
|------------------------------------|-------|----------|-------|--------|------------|
| 20150228_yeast1_Top_opt_B1_01_1611 | 21266 | TOF; CID | 52.58 | 628.85 | PEX17      |

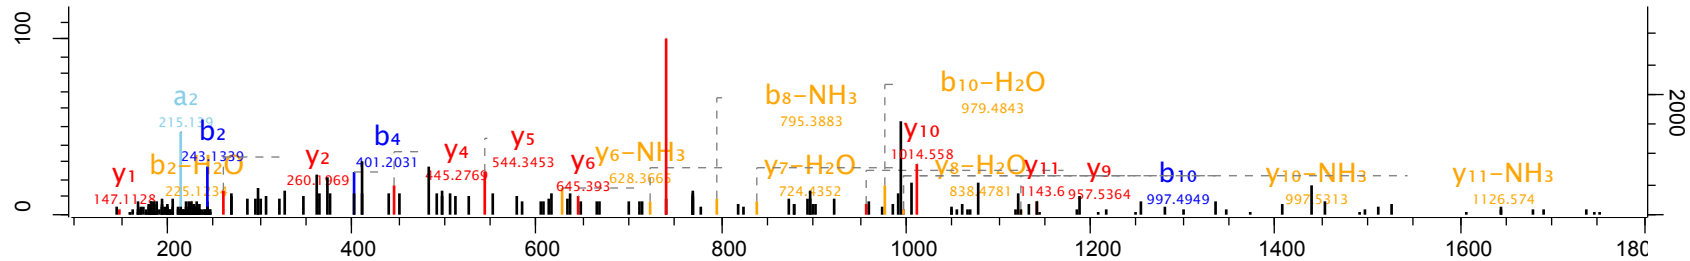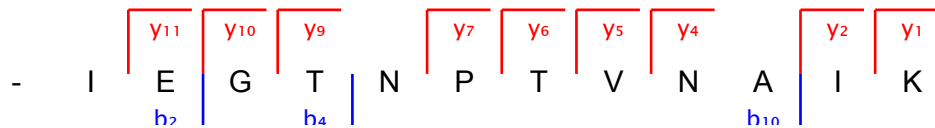

| Raw file                           | Scan  | Method   | Score | m/z    | Gene names |
|------------------------------------|-------|----------|-------|--------|------------|
| 20150228_yeast1_Top_opt_B1_01_1611 | 21465 | TOF; CID | 97.78 | 976.97 | SDC1       |

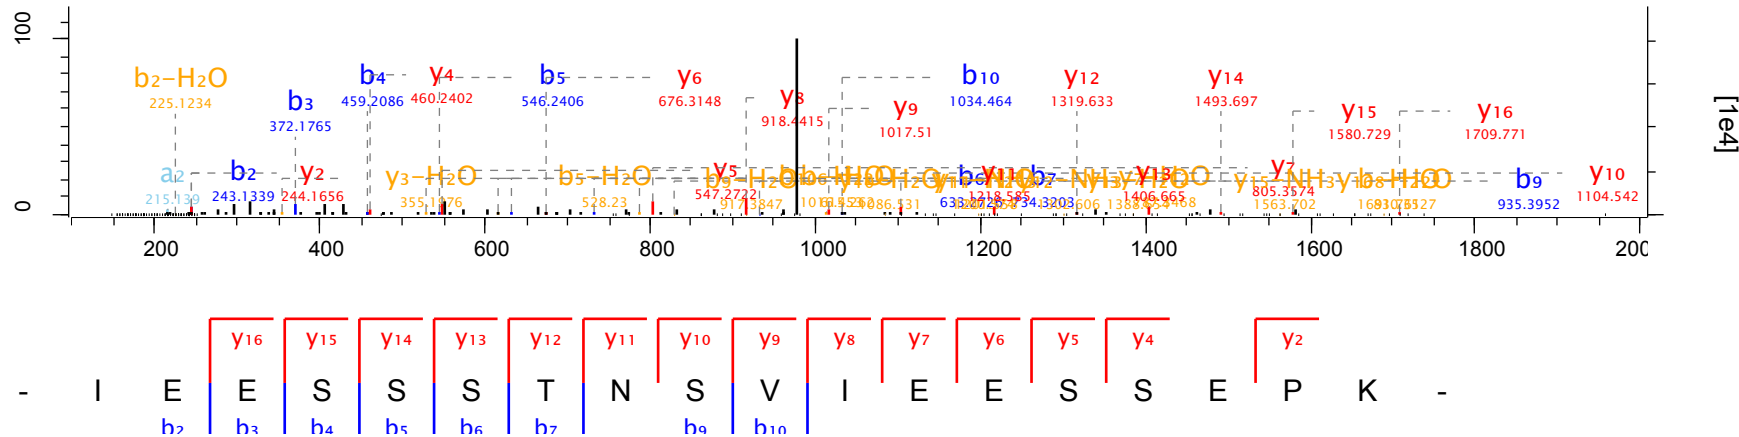

| Raw file                           | Scan  | Method   | Score | m/z    | Gene names |
|------------------------------------|-------|----------|-------|--------|------------|
| 20150228_yeast1_Top_opt_B1_01_1611 | 21666 | TOF; CID | 78.52 | 500.76 | YKL077W    |

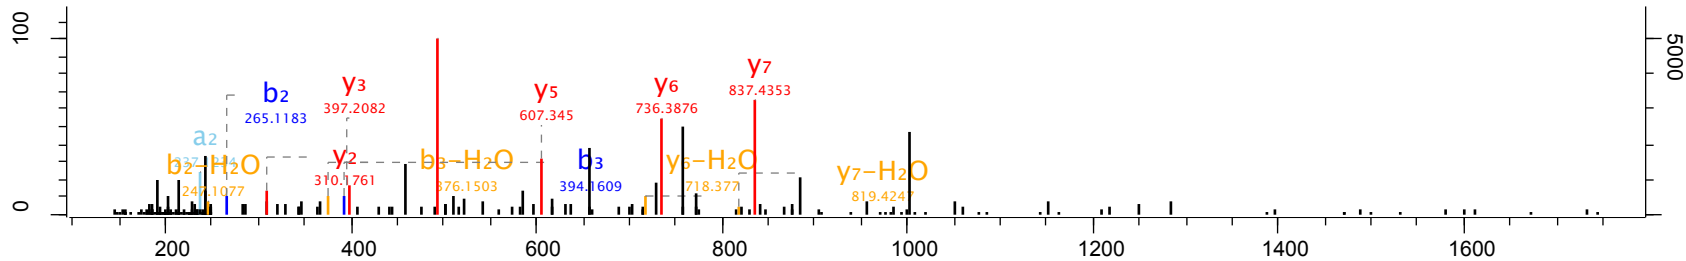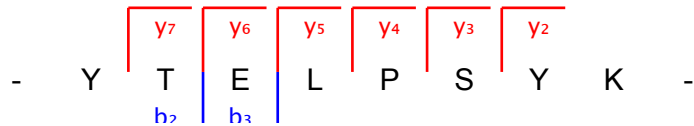

Raw file

Scan

Method

Score

m/z

Gene names

20150228\_yeast1\_Top\_opt\_B1\_01\_1611

21985

TOF; CID

90.05

432.9

LSM8

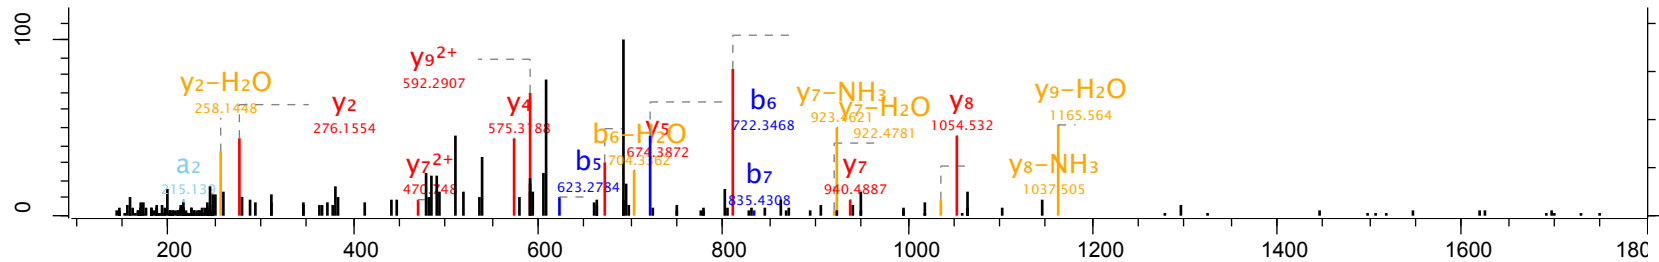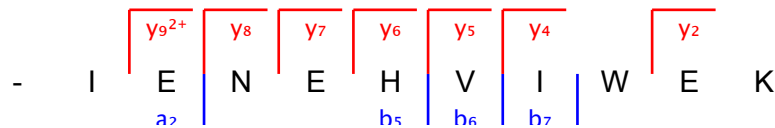



| Raw file                           | Scan  | Method   | Score | m/z    | Gene names |
|------------------------------------|-------|----------|-------|--------|------------|
| 20150228_yeast1_Top_opt_B1_01_1611 | 22036 | TOF; CID | 63.31 | 487.74 | COX19      |

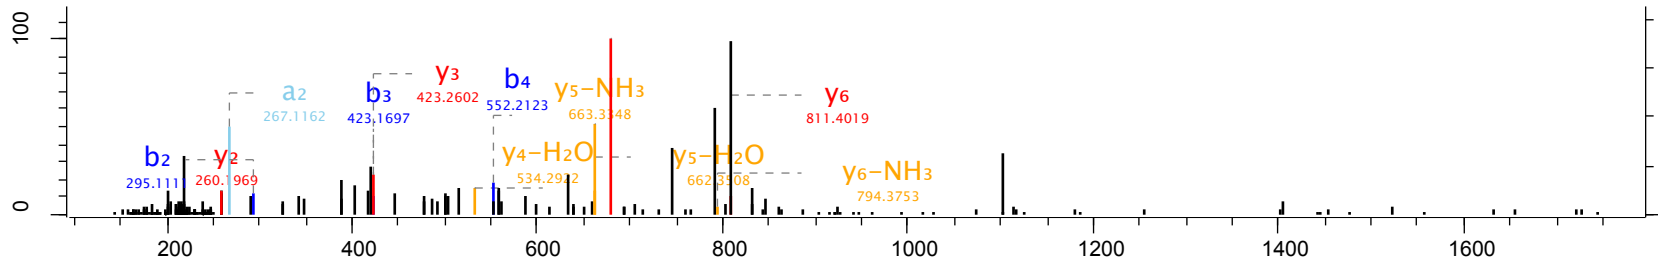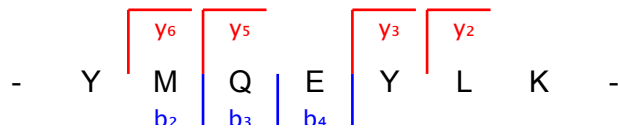

| Raw file                           | Scan  | Method   | Score | m/z    | Gene names |
|------------------------------------|-------|----------|-------|--------|------------|
| 20150228_yeast1_Top_opt_B1_01_1611 | 22694 | TOF; CID | 49.1  | 627.32 | SCD5       |

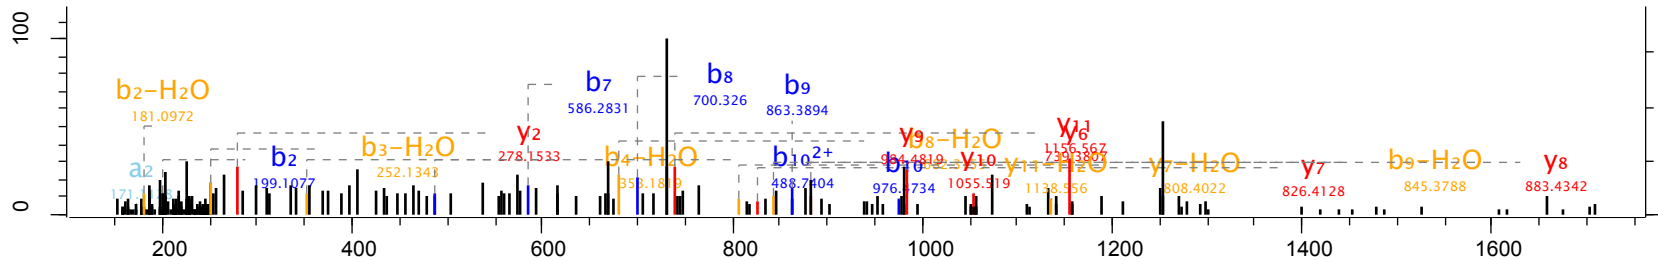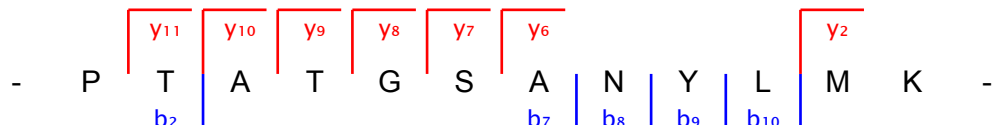

| Raw file                           | Scan  | Method   | Score | m/z    | Gene names |
|------------------------------------|-------|----------|-------|--------|------------|
| 20150228_yeast1_Top_opt_B1_01_1611 | 22890 | TOF; CID | 89.67 | 410.26 | PIC2       |

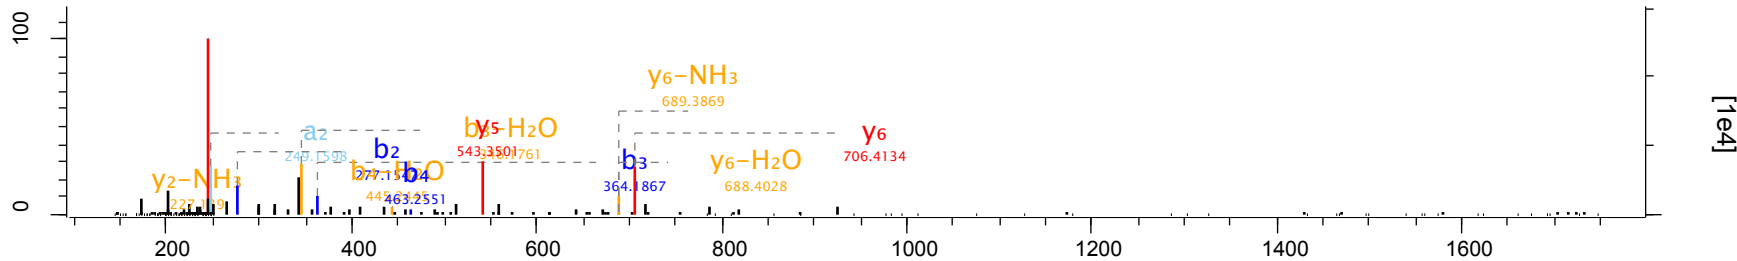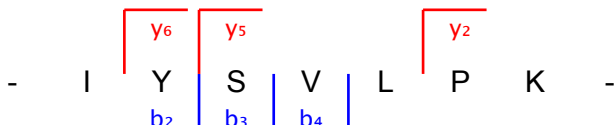

| Raw file                           | Scan  | Method   | Score | m/z    | Gene names |
|------------------------------------|-------|----------|-------|--------|------------|
| 20150228_yeast1_Top_opt_B1_01_1611 | 23649 | TOF; CID | 91.55 | 648.79 | FMP37      |

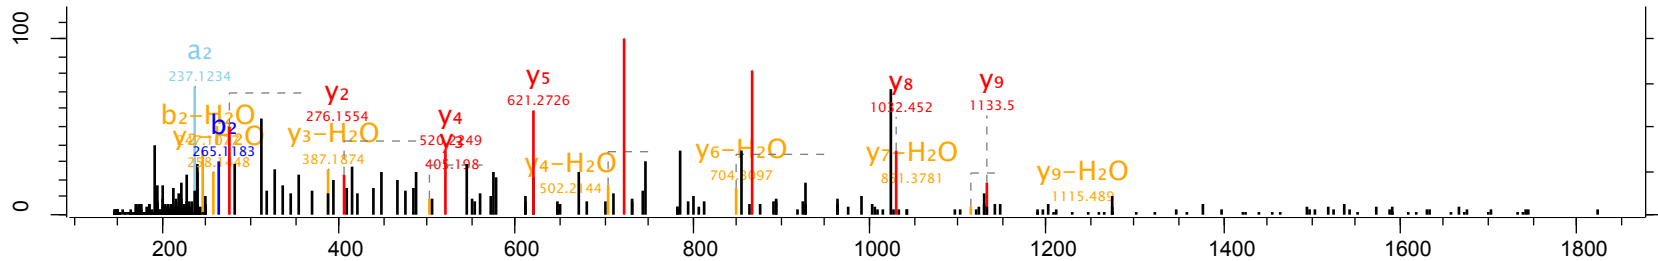

- Y **h<sub>2</sub>** T Y F T T D E E K -

Fragmentation diagram showing peptide sequence: Y T Y F T T D E E K. The sequence is divided into fragments by red brackets labeled y<sub>2</sub> through y<sub>9</sub>. A blue bracket labeled h<sub>2</sub> is shown below the first T residue.

Raw file

Scan

Method

Score

m/z

Gene names

20150228\_yeast1\_Top\_opt\_B1\_01\_1611

25287

TOF; CID

100.97

994.48

CHS6

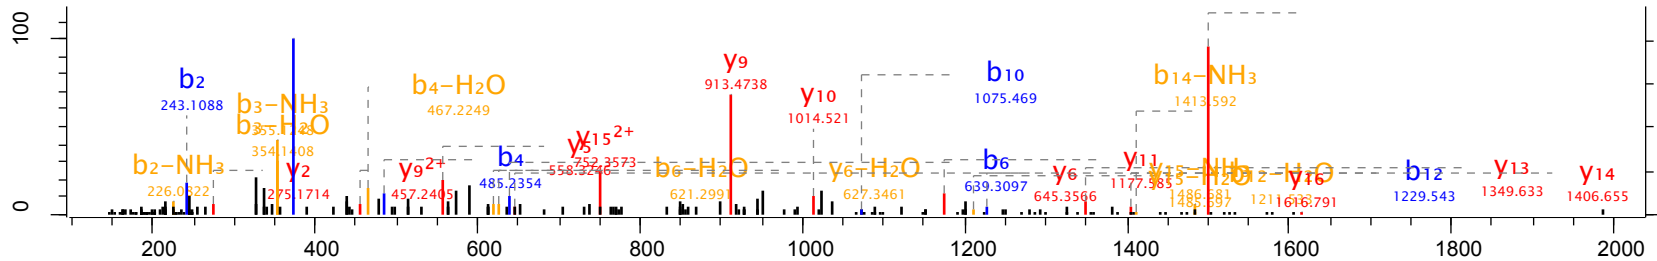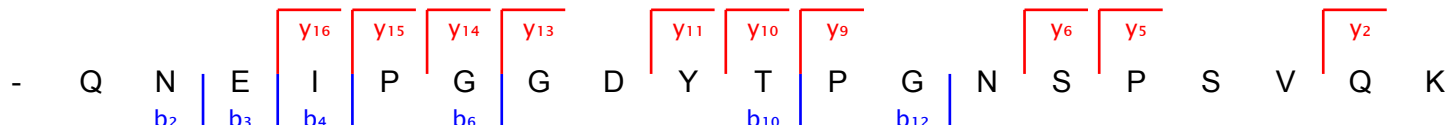

Raw file

Scan

Method

Score

m/z

Gene names

20150228\_yeast1\_Top\_opt\_B1\_01\_1611

25404

TOF; CID

150.91

610.63

MDM35

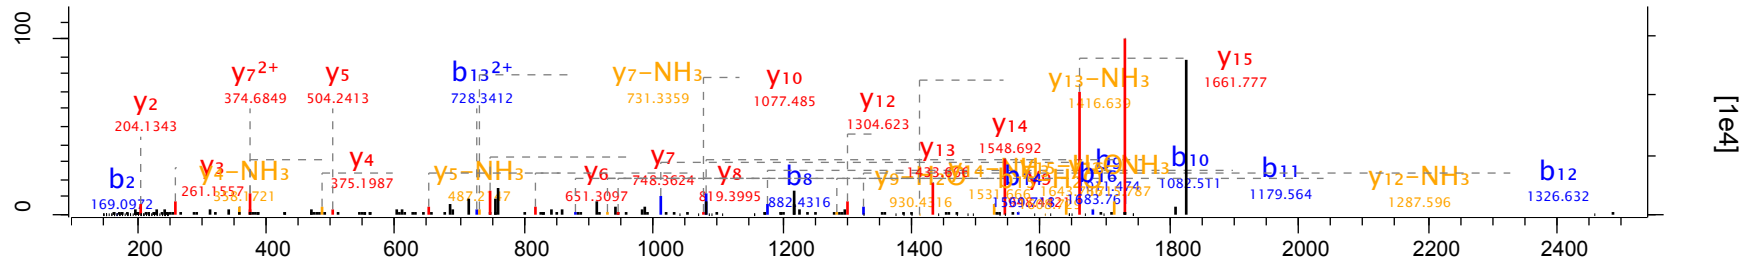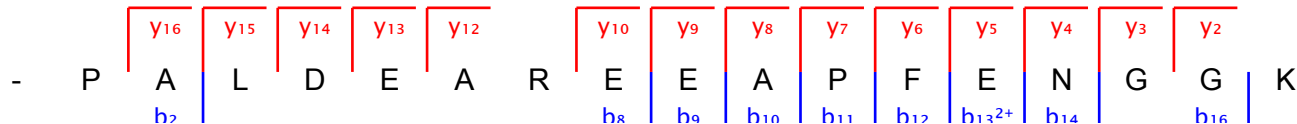

| Raw file                           | Scan  | Method   | Score | m/z    | Gene names |
|------------------------------------|-------|----------|-------|--------|------------|
| 20150228_yeast1_Top_opt_B1_01_1611 | 25822 | TOF; CID | 82.26 | 393.25 | TAF8       |

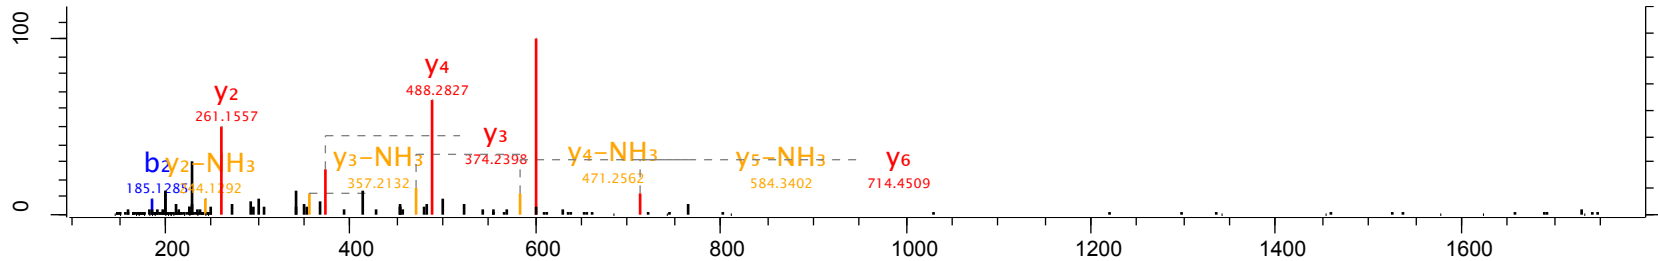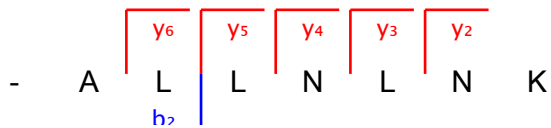

| Raw file                           | Scan  | Method   | Score | m/z    | Gene names |
|------------------------------------|-------|----------|-------|--------|------------|
| 20150228_yeast1_Top_opt_B1_01_1611 | 26831 | TOF; CID | 82.01 | 649.33 | MZM1       |

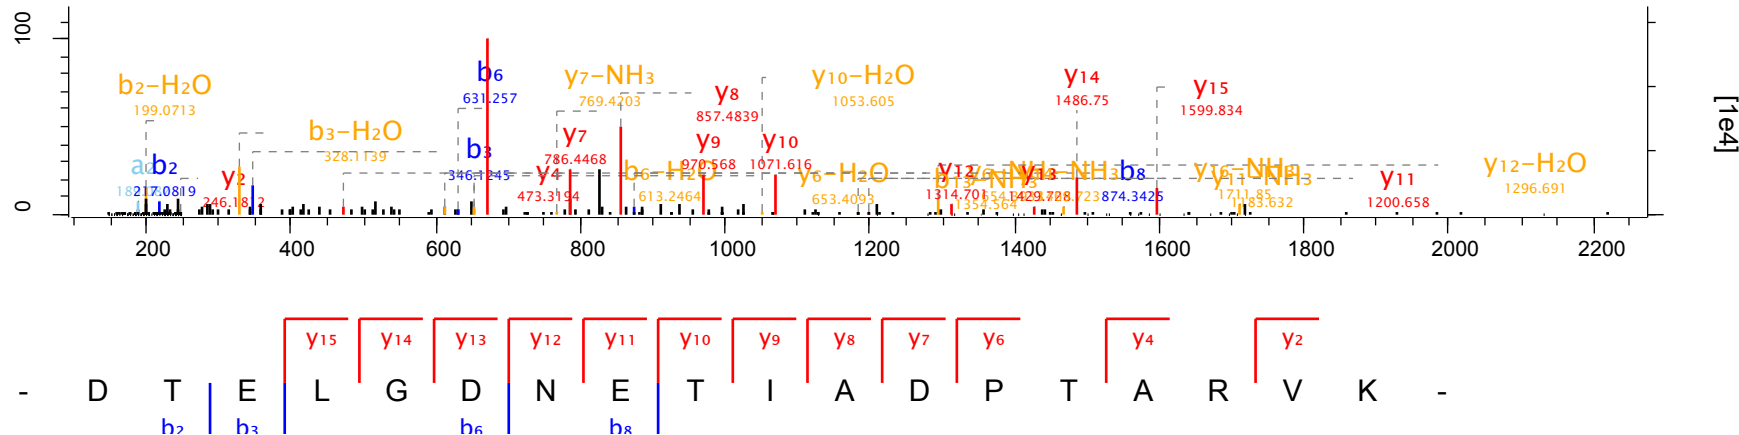



Raw file

Scan

Method

Score

m/z

Gene names

20150228\_yeast1\_Top\_opt\_B1\_01\_1611

26913

TOF; CID

99.94

758.87

PLB1

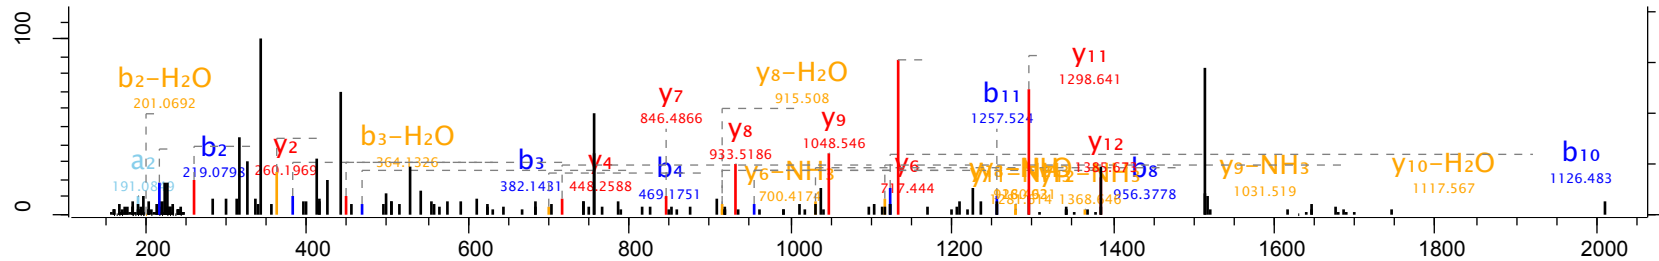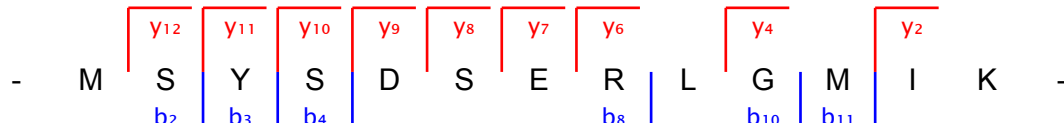

| Raw file                           | Scan  | Method   | Score | m/z    | Gene names |
|------------------------------------|-------|----------|-------|--------|------------|
| 20150228_yeast1_Top_opt_B1_01_1611 | 27407 | TOF; CID | 79.16 | 548.27 | CBC2       |

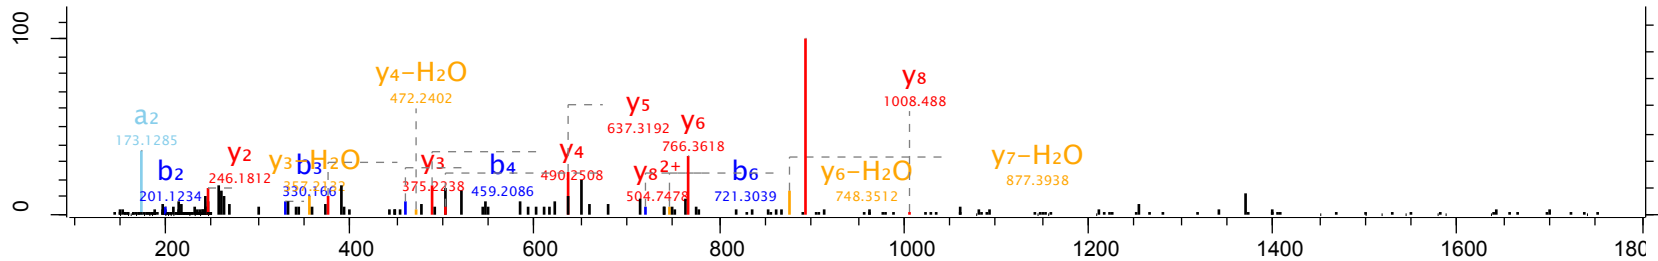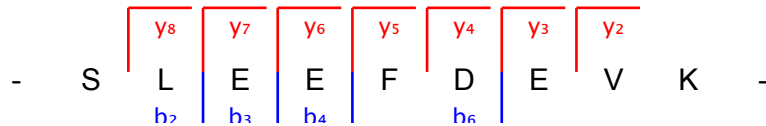

| Raw file                           | Scan  | Method   | Score | m/z    |
|------------------------------------|-------|----------|-------|--------|
| 20150228_yeast1_Top_opt_B1_01_1611 | 27569 | TOF; CID | 94.11 | 458.77 |

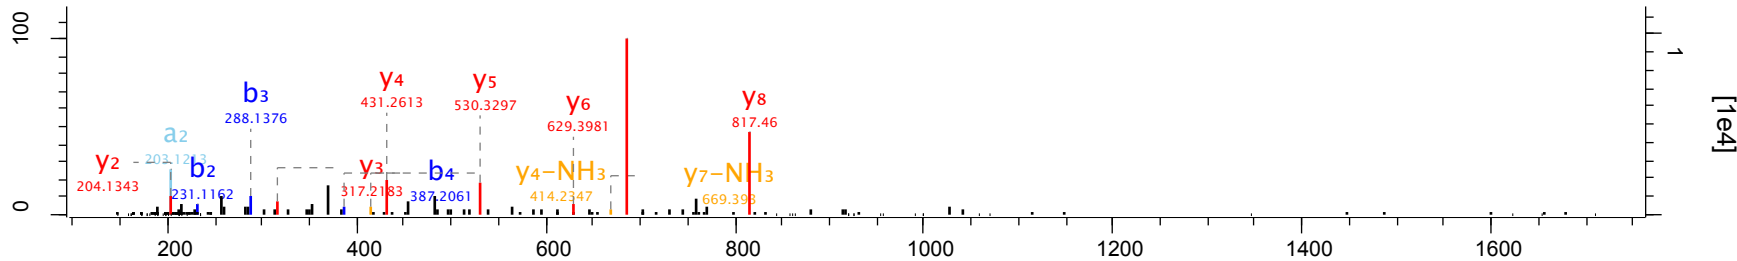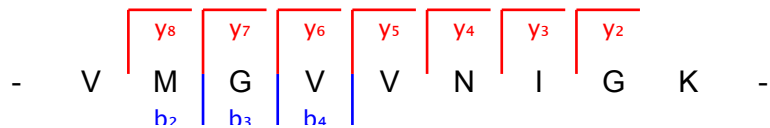

| Raw file                           | Scan  | Method   | Score  | m/z    | Gene names |
|------------------------------------|-------|----------|--------|--------|------------|
| 20150228_yeast1_Top_opt_B1_01_1611 | 27740 | TOF; CID | 100.02 | 513.26 | OM14       |

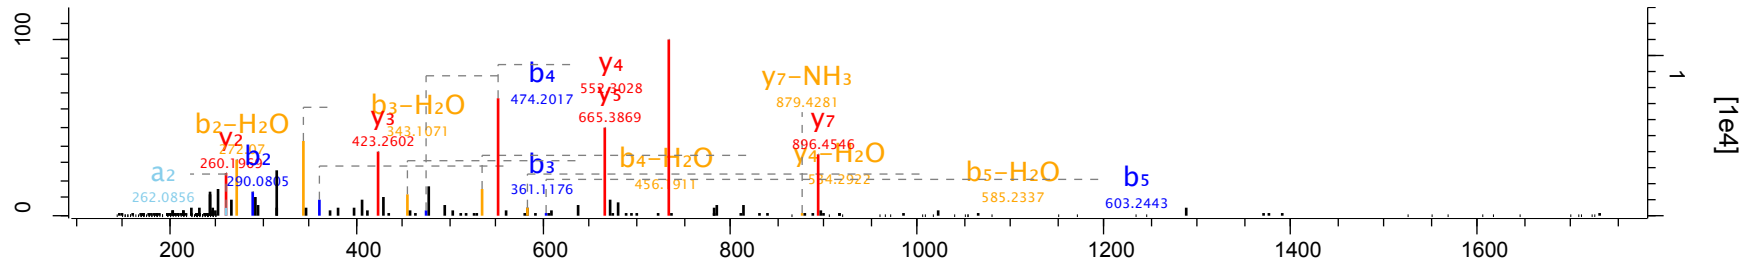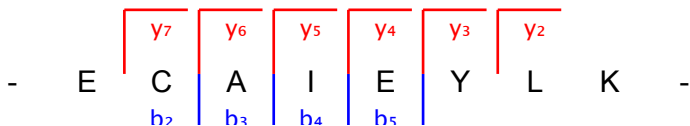

| Raw file                           | Scan  | Method   | Score | m/z    | Gene names |
|------------------------------------|-------|----------|-------|--------|------------|
| 20150228_yeast1_Top_opt_B1_01_1611 | 27759 | TOF; CID | 94.58 | 556.82 | MAK31      |

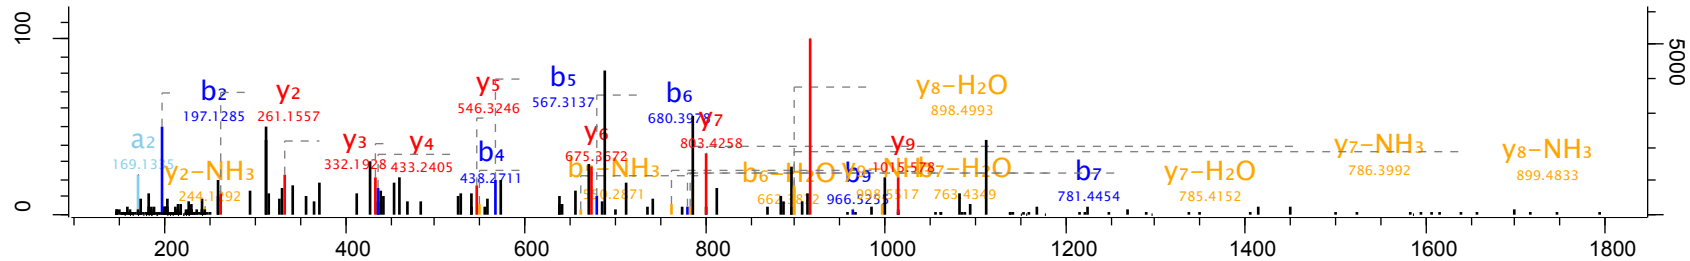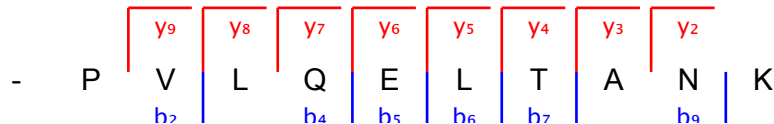

Raw file

20150228\_yeast1\_Top\_opt\_B1\_01\_1611

Scan

28022

Method

TOF; CID

Score

66.06

m/z

374.89

Gene names

MET8

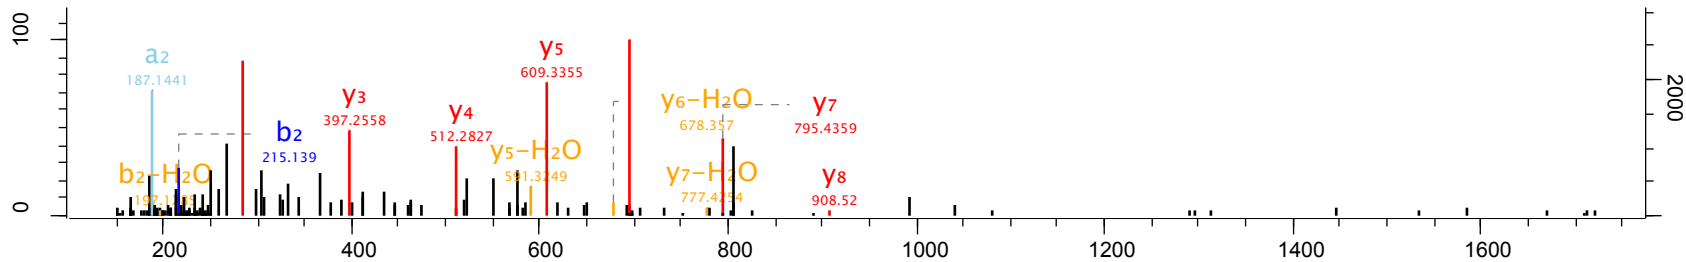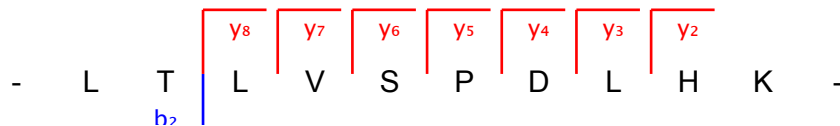

Raw file

Scan

Method

Score

m/z

Gene names

20150228\_yeast1\_Top\_opt\_B1\_01\_1611

28113

TOF; CID

117.08

527.96

MST27;MST28

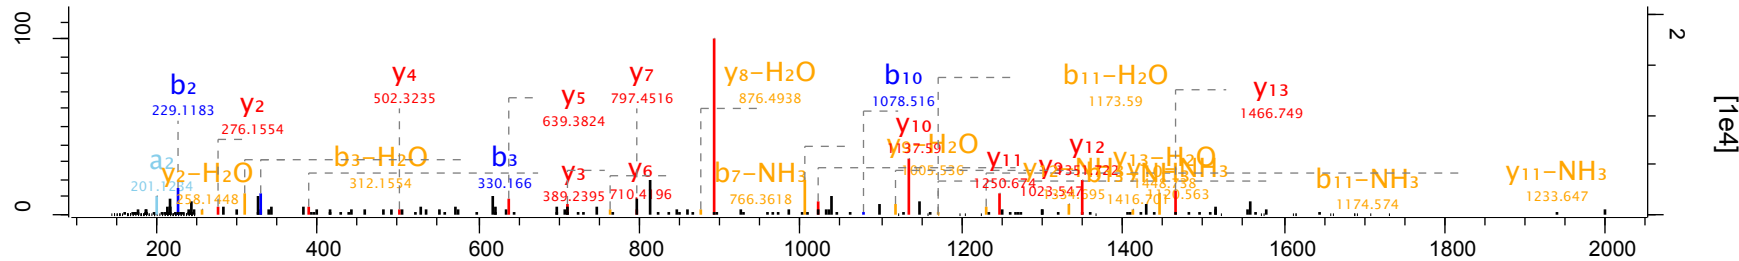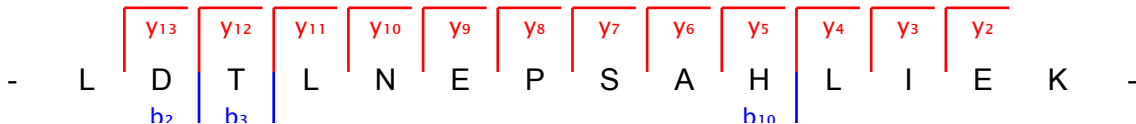

Raw file

Scan

Method

Score

m/z

Gene names

20150228\_yeast1\_Top\_opt\_B1\_01\_1611

28220

TOF; CID

65.18

617.32

MID1

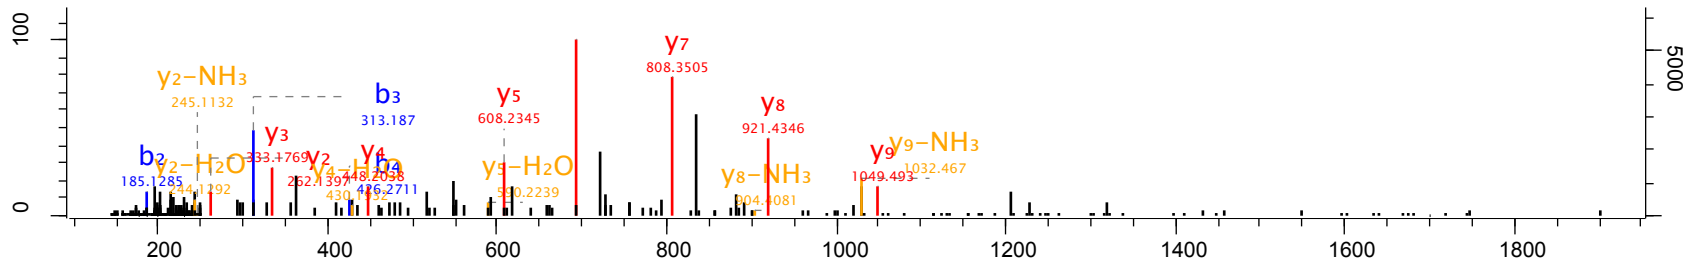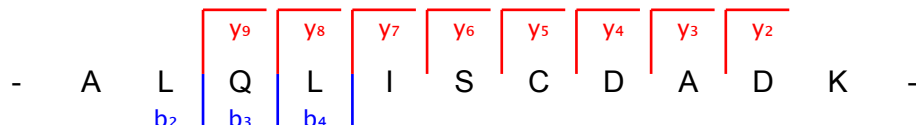



Raw file

20150228\_yeast1\_Top\_opt\_B1\_01\_1611

Scan

28323

Method

TOF; CID

Score

106.86

m/z

793.06

Gene names

STP22

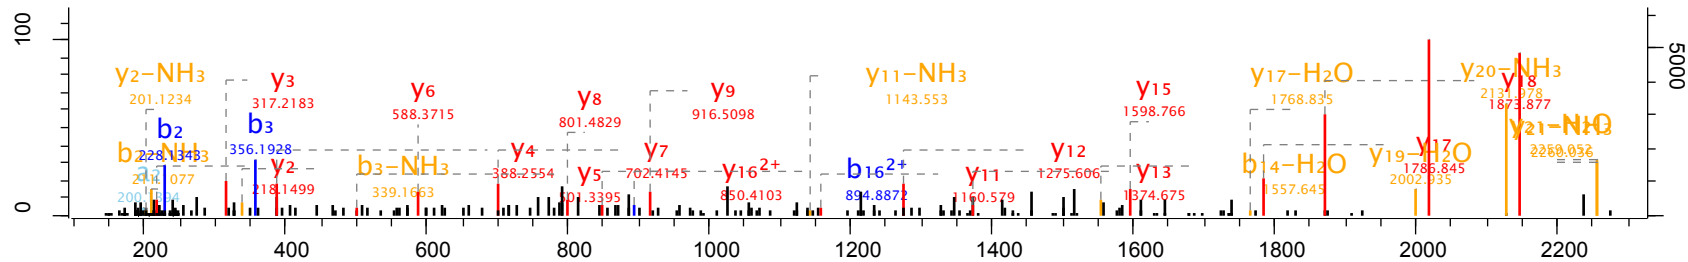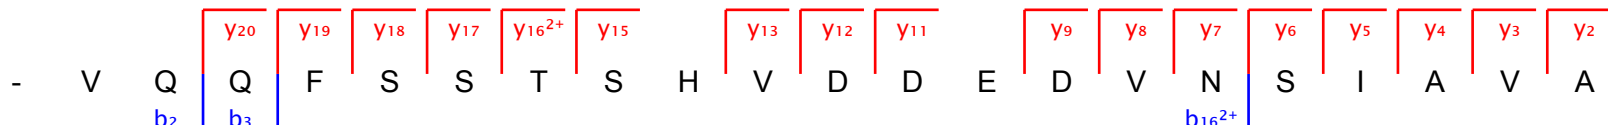

| Raw file                           | Scan  | Method   | Score  | m/z    | Gene names |
|------------------------------------|-------|----------|--------|--------|------------|
| 20150228_yeast1_Top_opt_B1_01_1611 | 28406 | TOF; CID | 124.12 | 673.38 | MNR2       |

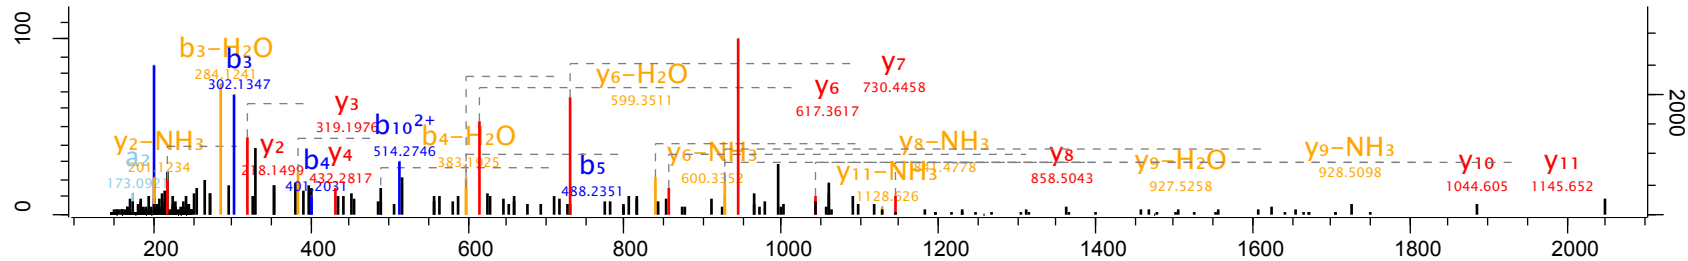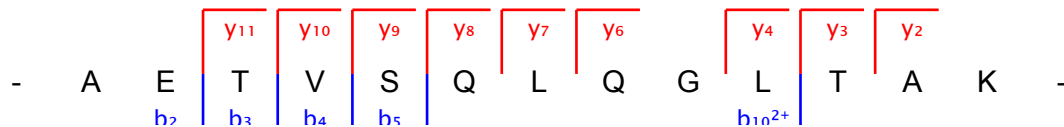

| Raw file                           | Scan  | Method   | Score  | m/z    | Gene names |
|------------------------------------|-------|----------|--------|--------|------------|
| 20150228_yeast1_Top_opt_B1_01_1611 | 28501 | TOF; CID | 114.28 | 393.88 | YLR361C-A  |

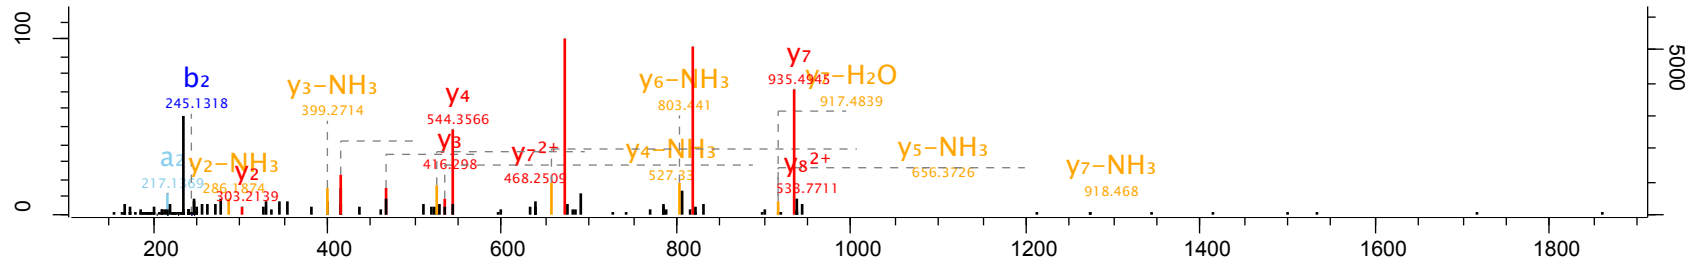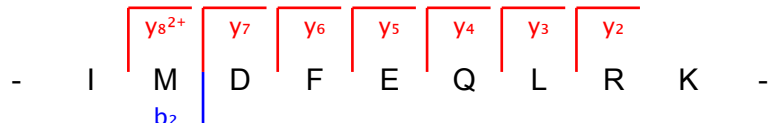

| Raw file                           | Scan  | Method   | Score | m/z    | Gene names |
|------------------------------------|-------|----------|-------|--------|------------|
| 20150228_yeast1_Top_opt_B1_01_1611 | 29183 | TOF; CID | 68.22 | 475.26 | RMD1       |

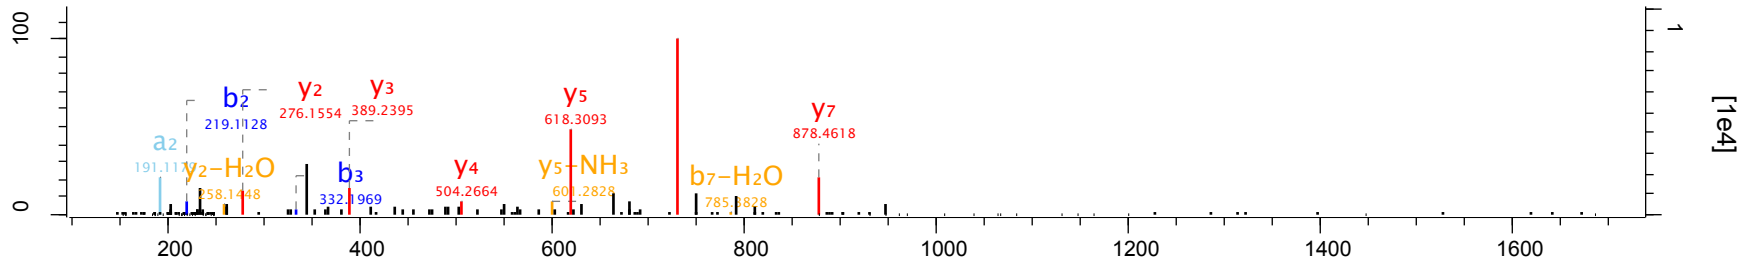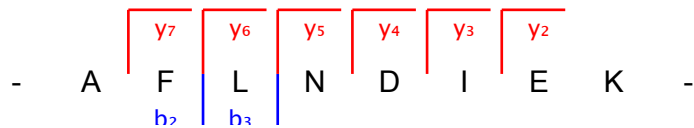

| Raw file                           | Scan  | Method   | Score  | m/z   | Gene names |
|------------------------------------|-------|----------|--------|-------|------------|
| 20150228_yeast1_Top_opt_B1_01_1611 | 30084 | TOF; CID | 107.82 | 568.3 | YGR169C-A  |

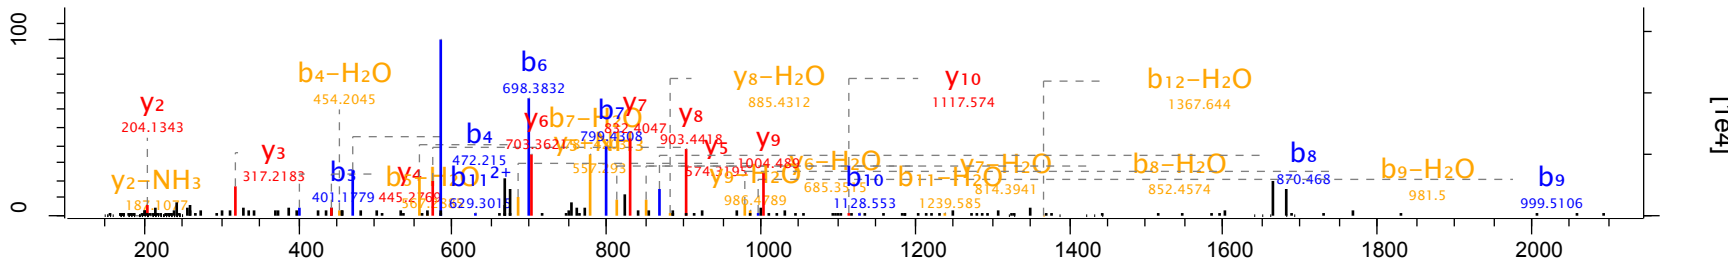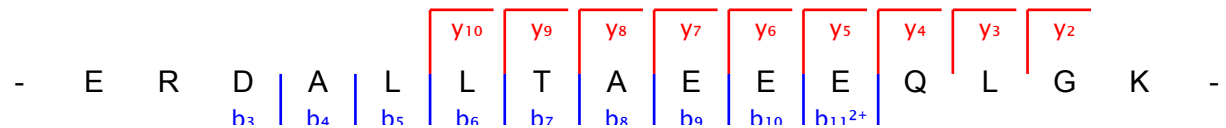

| Raw file                           | Scan  | Method   | Score | m/z    |
|------------------------------------|-------|----------|-------|--------|
| 20150228_yeast1_Top_opt_B1_01_1611 | 30181 | TOF; CID | 60.91 | 505.28 |

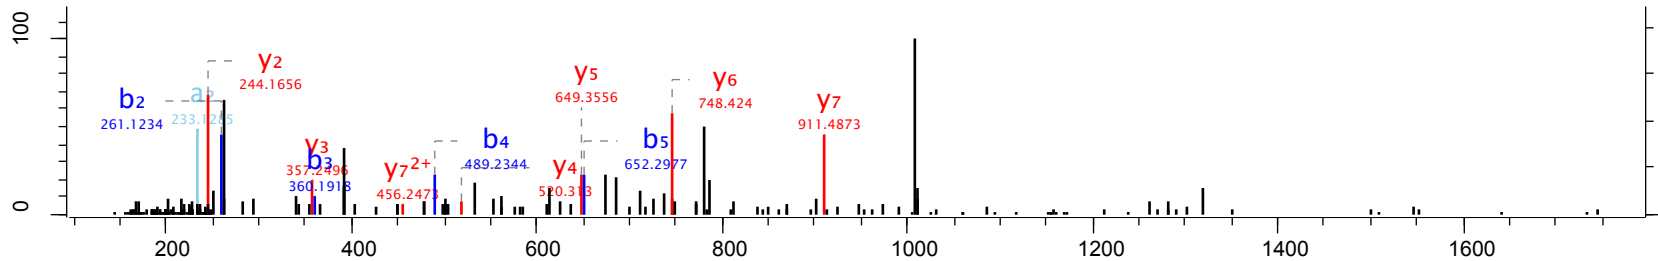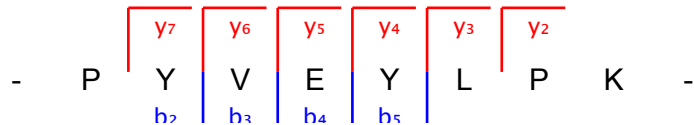

Raw file

20150228\_yeast1\_Top\_opt\_B1\_01\_1611

Scan

30952

Method

TOF; CID

Score

166.77

m/z

1006.5

Gene names

MGR2

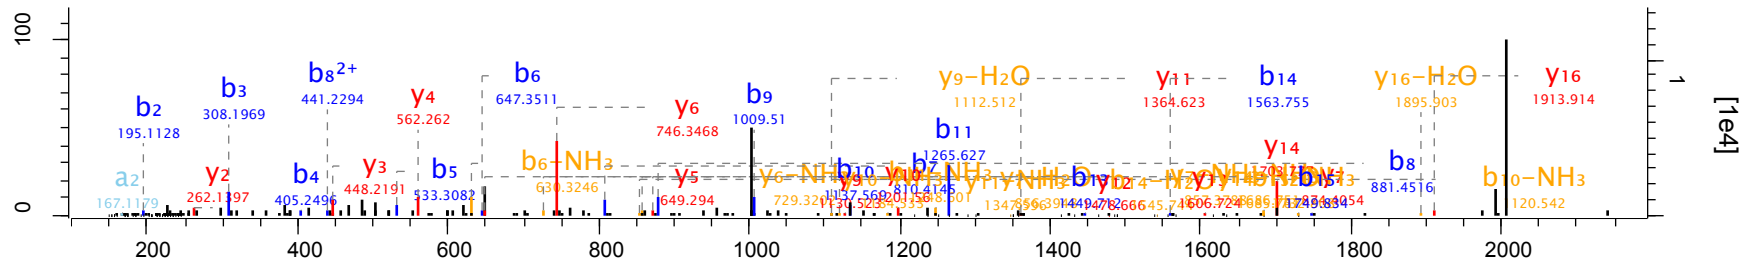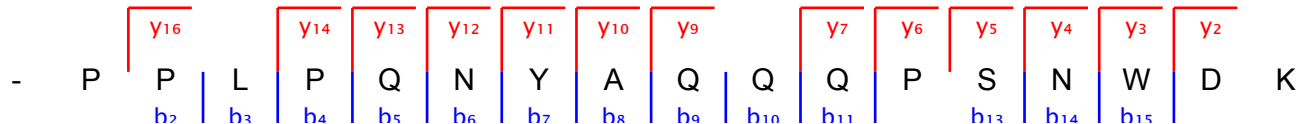

Raw file

20150228\_yeast1\_Top\_opt\_B1\_01\_1611

Scan

31895

Method

TOF; CID

Score

115.12

m/z

678.87

Gene names

RPN13

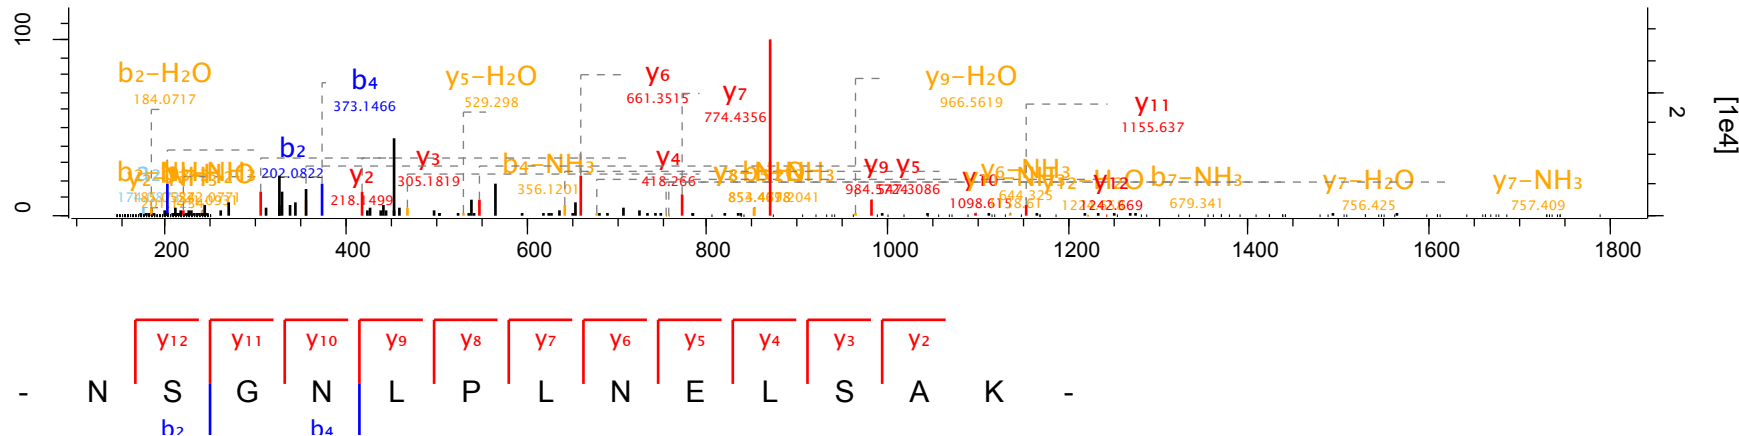



| Raw file                           | Scan  | Method   | Score | m/z    | Gene names |
|------------------------------------|-------|----------|-------|--------|------------|
| 20150228_yeast1_Top_opt_B1_01_1611 | 31918 | TOF; CID | 71.38 | 468.78 | BET4       |

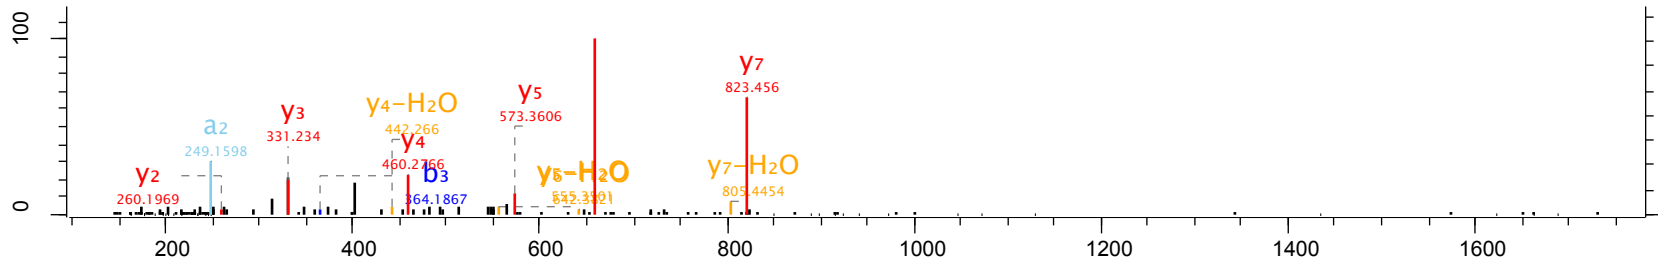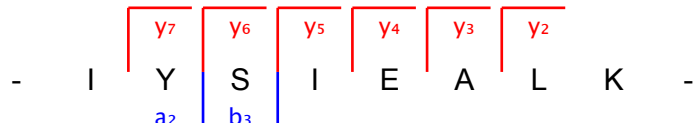

Raw file

Scan

Method

Score

m/z

Gene names

20150228\_yeast1\_Top\_opt\_B1\_01\_1611

32443

TOF; CID

83.05

456.56

ASK1

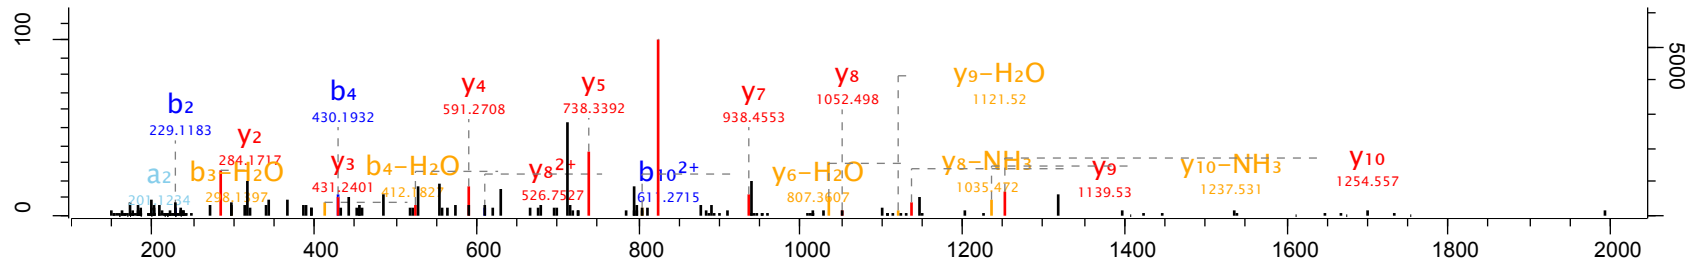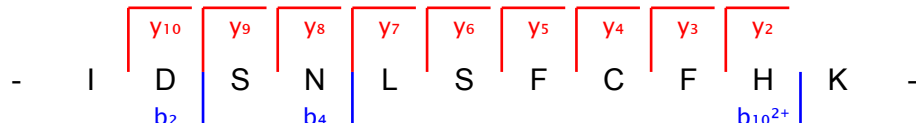

| Raw file                           | Scan  | Method   | Score | m/z    | Gene names |
|------------------------------------|-------|----------|-------|--------|------------|
| 20150228_yeast1_Top_opt_B1_01_1611 | 33660 | TOF; CID | 42.86 | 546.32 | TYE7       |

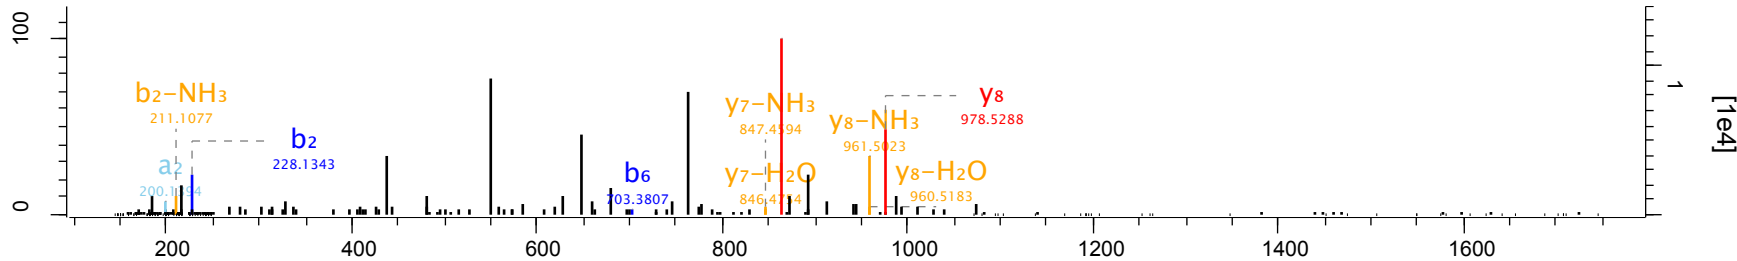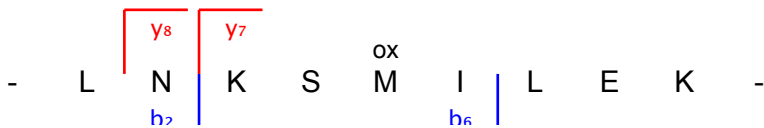

| Raw file                           | Scan  | Method   | Score | m/z    | Gene names |
|------------------------------------|-------|----------|-------|--------|------------|
| 20150228_yeast1_Top_opt_B1_01_1611 | 33825 | TOF; CID | 51.73 | 685.34 | LCB3       |

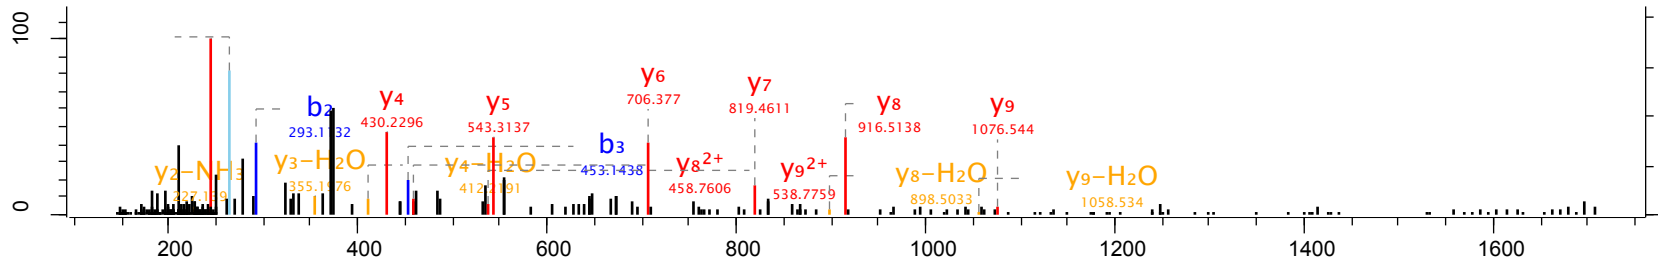

- Y E C P L Y I G E P K -  
 b<sub>2</sub> b<sub>3</sub>

y<sub>9</sub> y<sub>8</sub> y<sub>7</sub> y<sub>6</sub> y<sub>5</sub> y<sub>4</sub> y<sub>2</sub>

| Raw file                           | Scan  | Method   | Score | m/z   | Gene names |
|------------------------------------|-------|----------|-------|-------|------------|
| 20150228_yeast1_Top_opt_B1_01_1611 | 33896 | TOF; CID | 85.68 | 486.3 | PEP12      |

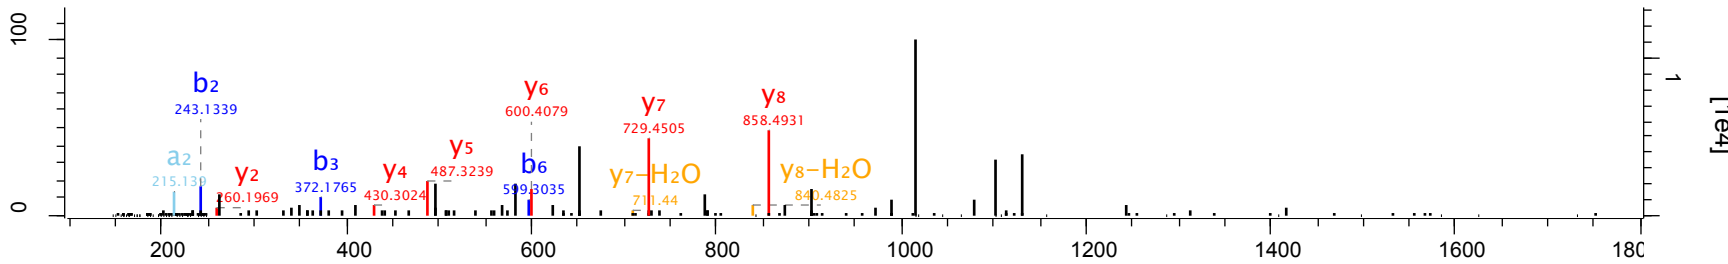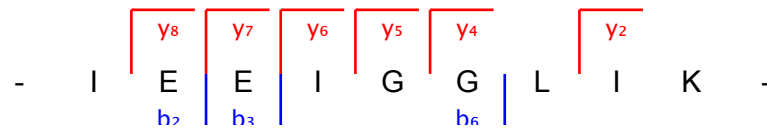

Raw file

Scan

Method

Score

m/z

Gene names

20150228\_yeast1\_Top\_opt\_B1\_01\_1611

34606

TOF; CID

55.98

768.39

JNM1

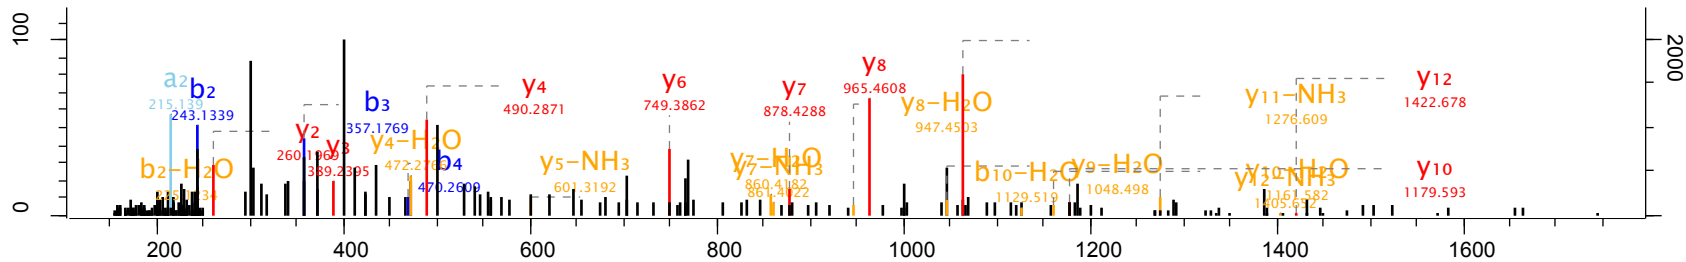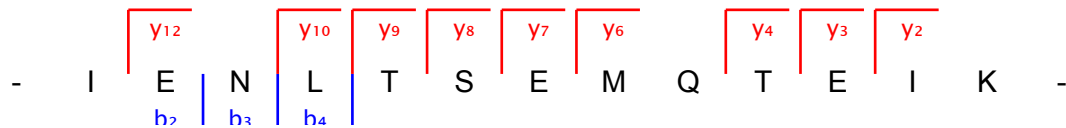

| Raw file                           | Scan  | Method   | Score | m/z   | Gene names |
|------------------------------------|-------|----------|-------|-------|------------|
| 20150228_yeast1_Top_opt_B1_01_1611 | 34796 | TOF; CID | 64.82 | 618.3 | AGA2       |

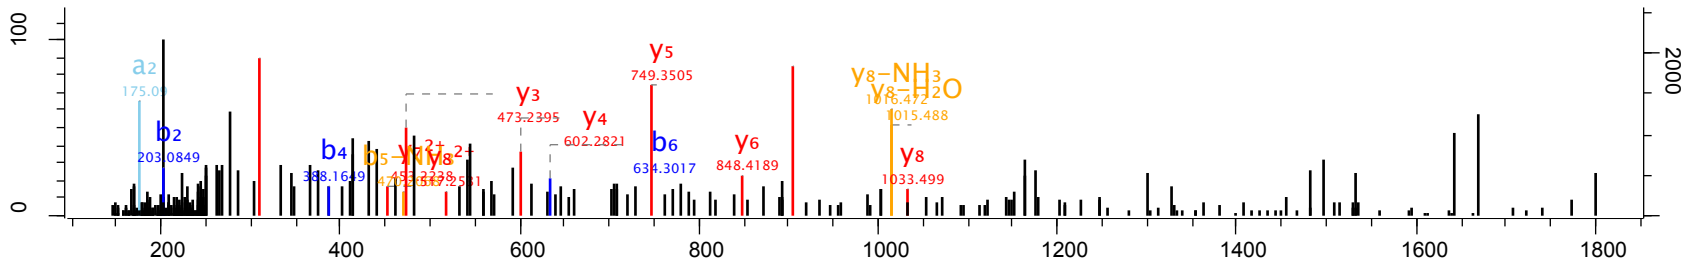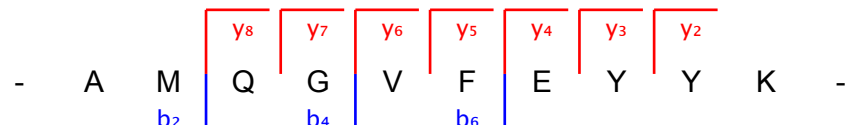

Raw file

20150228\_yeast1\_Top\_opt\_B1\_01\_1611

Scan

34874

Method

TOF; CID

Score

136.26

m/z

1158.01

Gene names

COX23

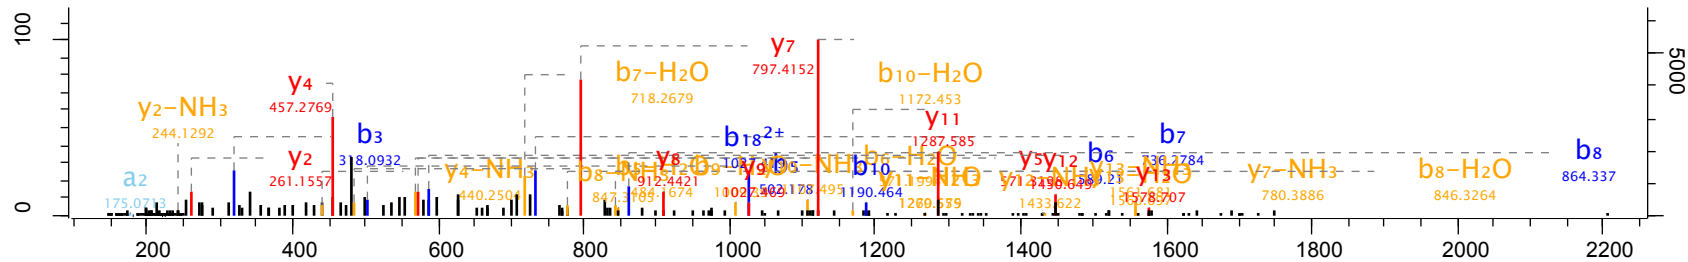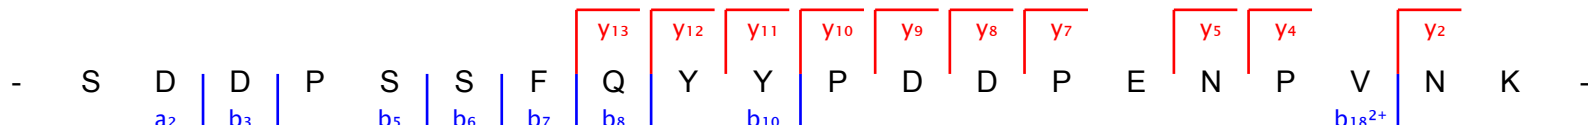



Raw file

Scan

Method

Score

m/z

Gene names

20150228\_yeast1\_Top\_opt\_B1\_01\_1611

35094

TOF; CID

113.88

513.77

NIS1

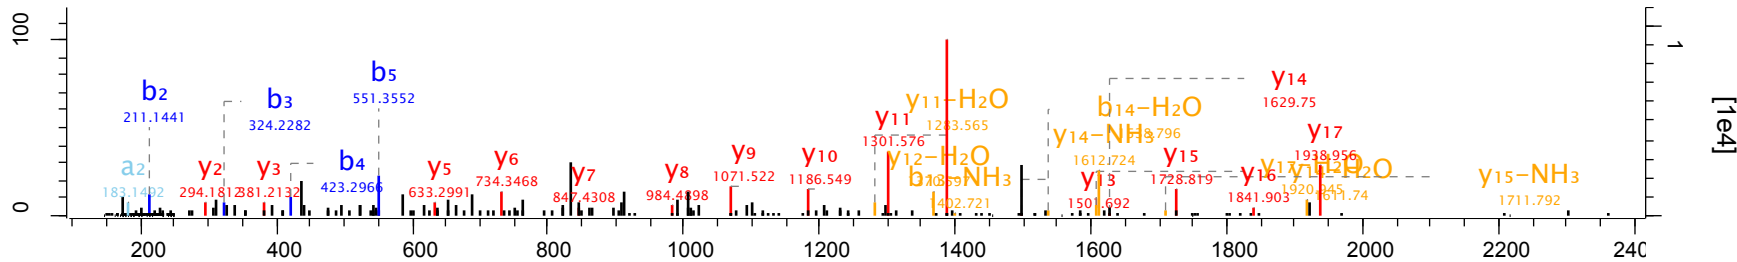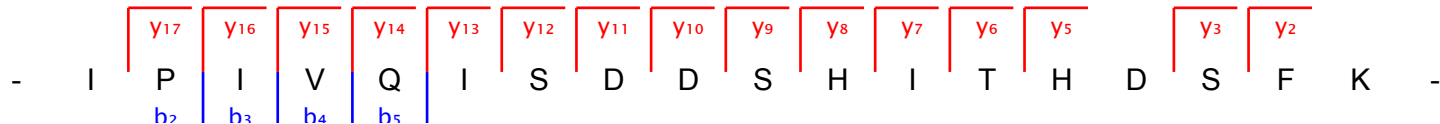

| Raw file                           | Scan  | Method   | Score | m/z    | Gene names |
|------------------------------------|-------|----------|-------|--------|------------|
| 20150228_yeast1_Top_opt_B1_01_1611 | 35213 | TOF; CID | 57.43 | 728.41 | INO4       |

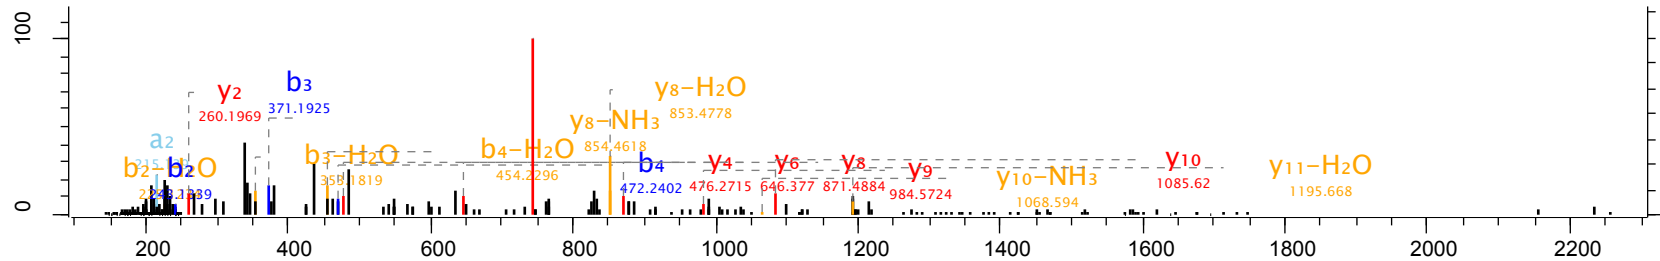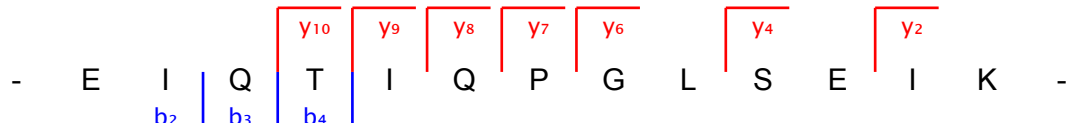

| Raw file                           | Scan  | Method   | Score  | m/z    | Gene names |
|------------------------------------|-------|----------|--------|--------|------------|
| 20150228_yeast1_Top_opt_B1_01_1611 | 36076 | TOF; CID | 125.97 | 474.93 | ARC19      |

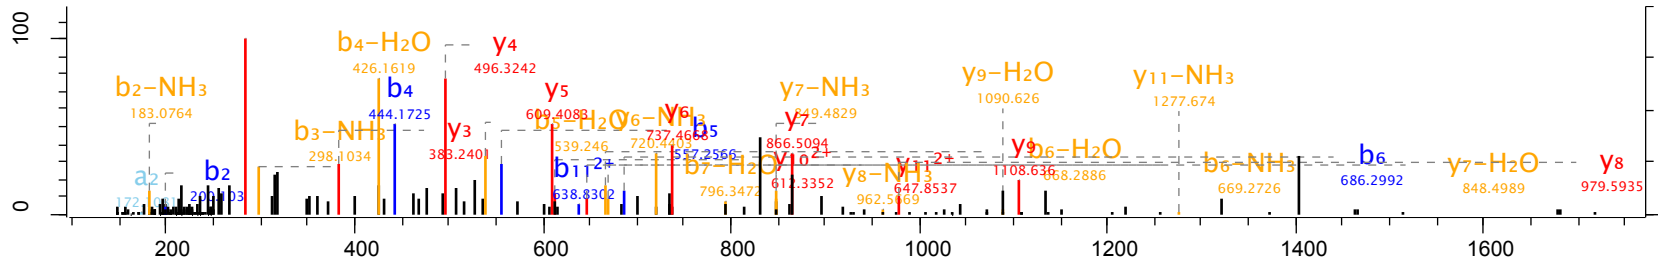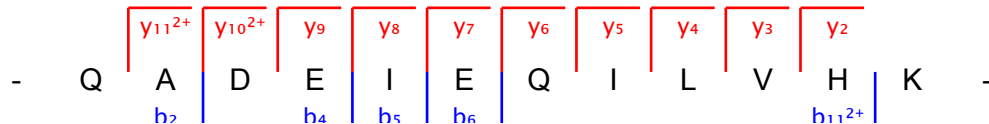

Raw file 20150228\_yeast1\_Top\_opt\_B1\_01\_1611 Scan 37080 Method TOF; CID Score 183.23 m/z 597.3 Gene names MRH1

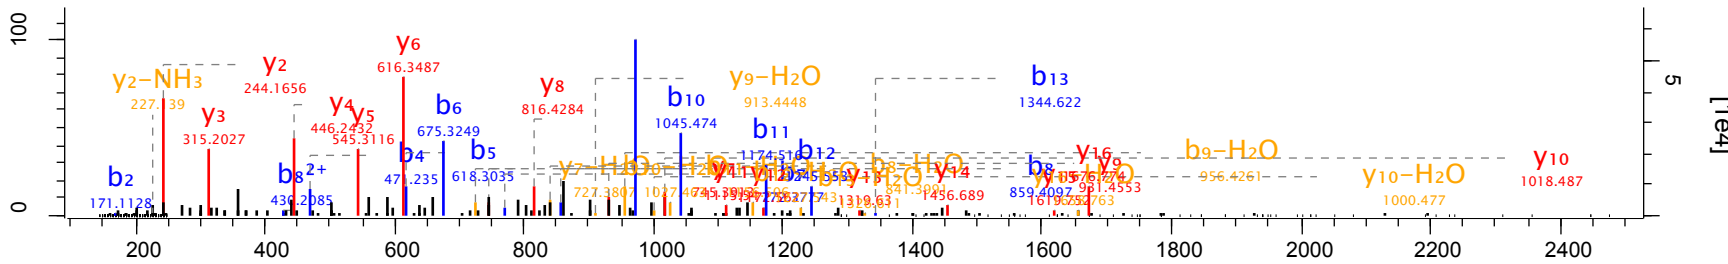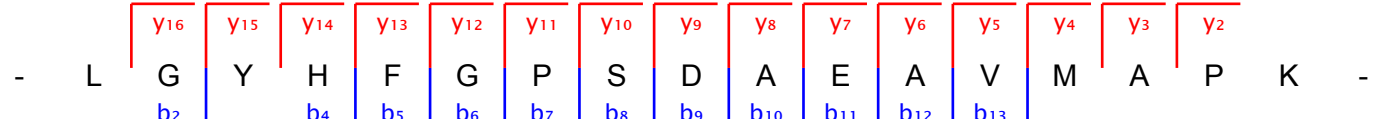

| Raw file                           | Scan  | Method   | Score | m/z    | Gene names |
|------------------------------------|-------|----------|-------|--------|------------|
| 20150228_yeast1_Top_opt_B1_01_1611 | 37608 | TOF; CID | 88.71 | 506.63 | SKO1       |

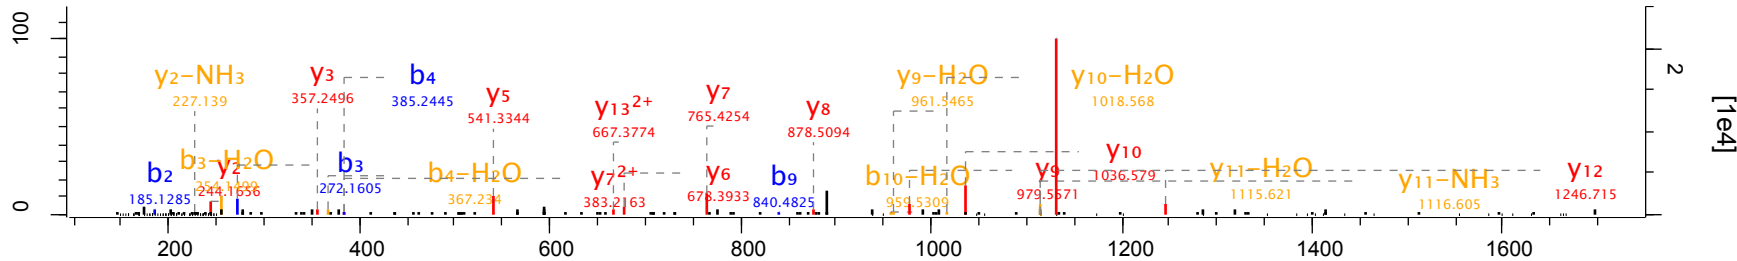

- A L S L P G T I S H P S L P K -

b<sub>2</sub> b<sub>3</sub> b<sub>4</sub> y<sub>13</sub><sup>2+</sup> y<sub>12</sub> y<sub>11</sub> y<sub>10</sub> y<sub>9</sub> y<sub>8</sub> y<sub>7</sub> y<sub>6</sub> y<sub>5</sub> y<sub>3</sub> y<sub>2</sub>

b<sub>2</sub> b<sub>3</sub> b<sub>4</sub> b<sub>9</sub>

| Raw file                           | Scan  | Method   | Score | m/z    | Gene names |
|------------------------------------|-------|----------|-------|--------|------------|
| 20150228_yeast1_Top_opt_B1_01_1611 | 38600 | TOF; CID | 58.12 | 743.87 | VPS20      |

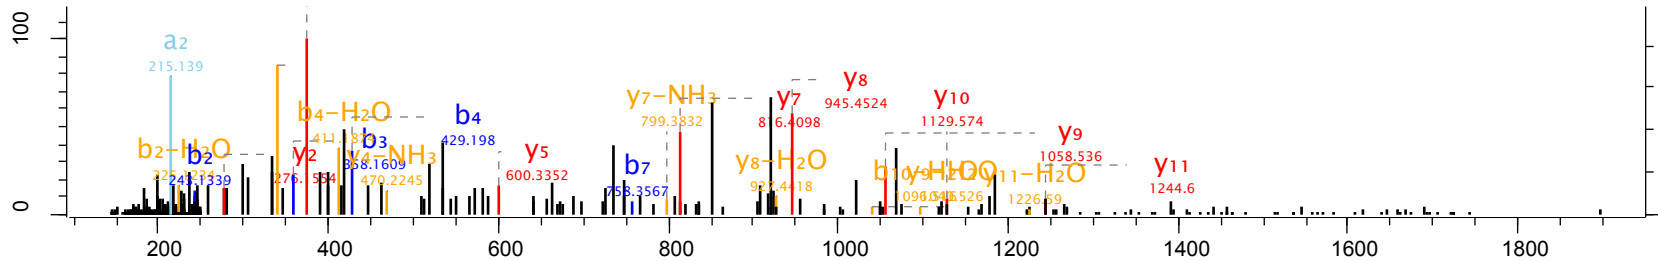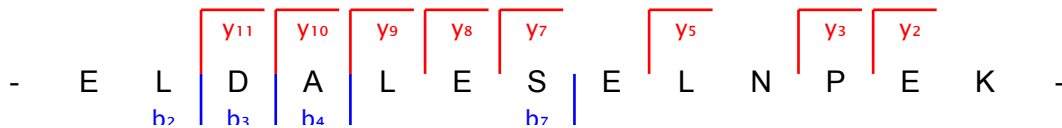

| Raw file                           | Scan  | Method   | Score | m/z    | Gene names |
|------------------------------------|-------|----------|-------|--------|------------|
| 20150228_yeast1_Top_opt_B1_01_1611 | 39286 | TOF; CID | 80.51 | 760.39 | MET31      |

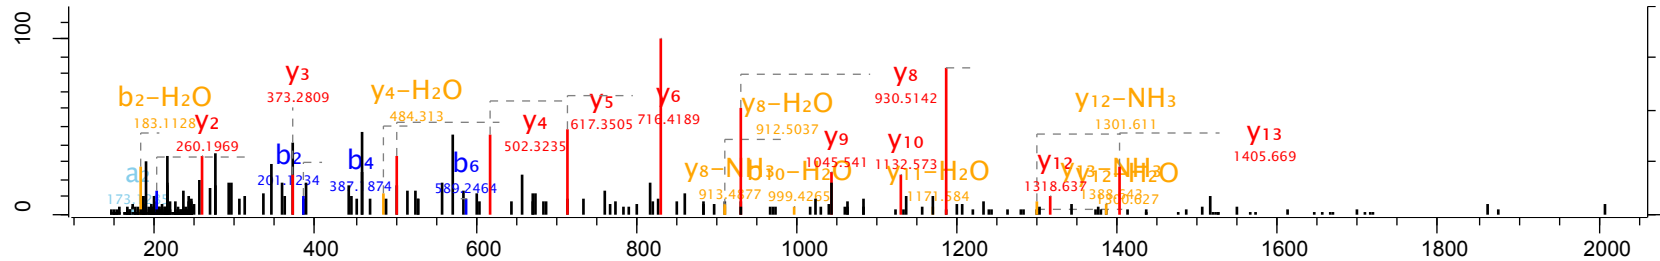

- L ┌ y13 S ┌ y12 E ┌ y11 G ┌ y10 S ┌ y9 D ┌ y8 V ┌ y7 D ┌ y6 V ┌ y5 D ┌ y4 E ┌ y3 L ┌ y2 I K -  
b2

Raw file

20150228\_yeast1\_Top\_opt\_B1\_01\_1611

Scan

40922

Method

TOF; CID

Score

80.44

m/z

507.74

Gene names

SPT2

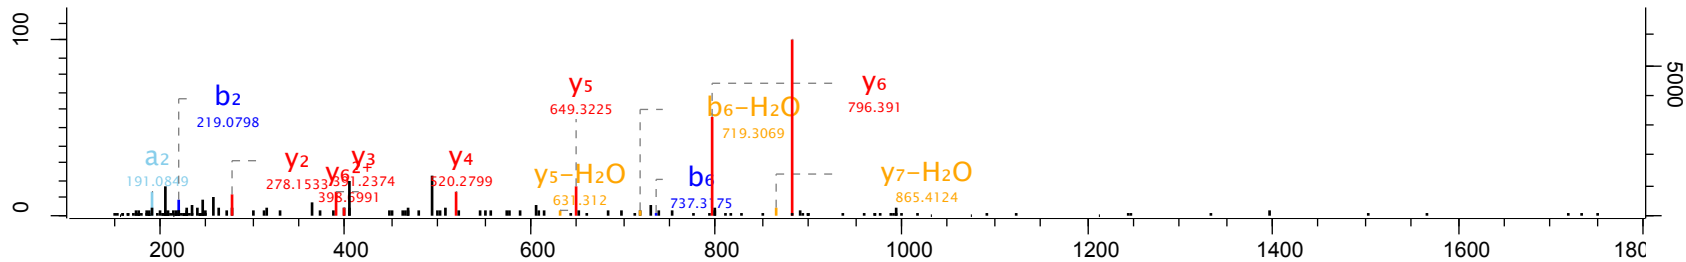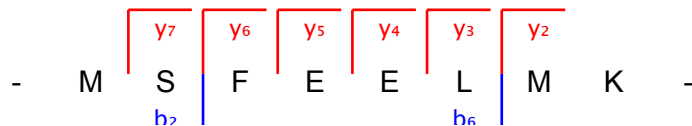



| Raw file                           | Scan  | Method   | Score | m/z    | Gene names |
|------------------------------------|-------|----------|-------|--------|------------|
| 20150228_yeast1_Top_opt_B1_01_1611 | 41017 | TOF; CID | 44.61 | 609.33 | RML2       |

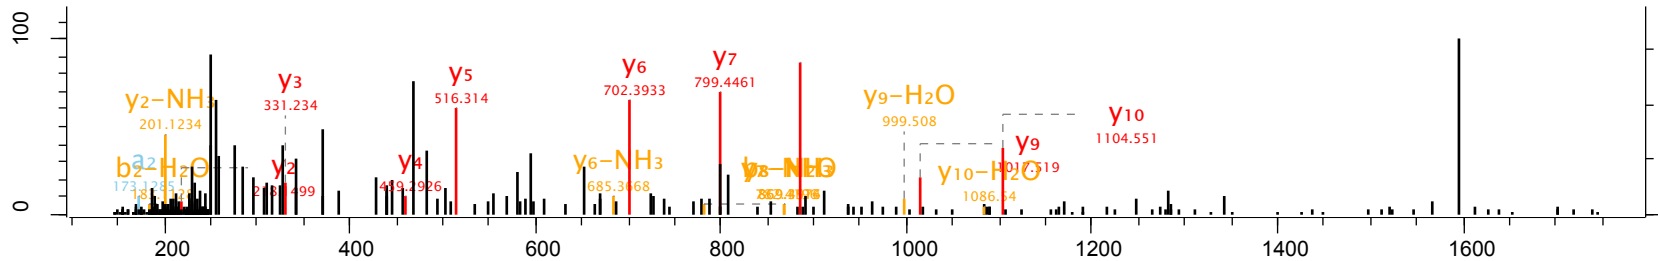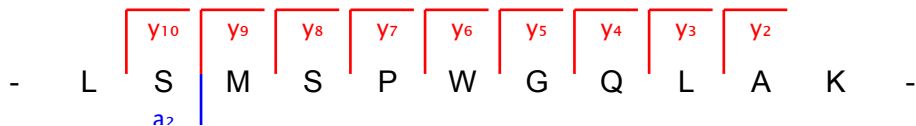

Raw file

Scan

Method

Score

m/z

Gene names

20150228\_yeast1\_Top\_opt\_B1\_01\_1611

41028

TOF; CID

76.55

995.46

CSI2

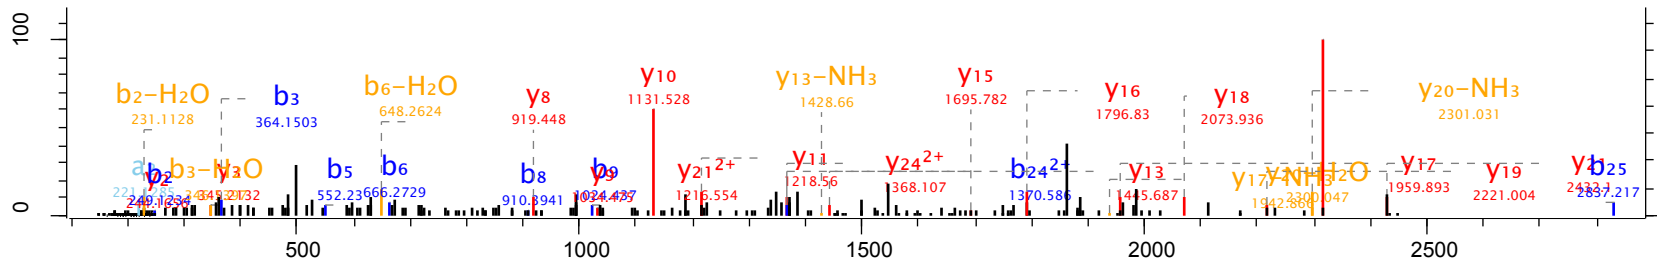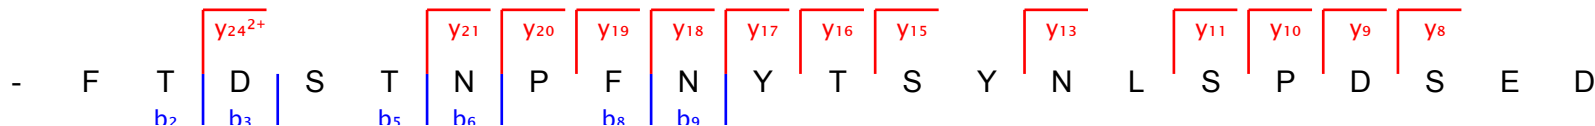

| Raw file                           | Scan  | Method   | Score | m/z    | Gene names |
|------------------------------------|-------|----------|-------|--------|------------|
| 20150228_yeast1_Top_opt_B1_01_1611 | 41179 | TOF; CID | 73.07 | 891.43 | YBR255C-A  |

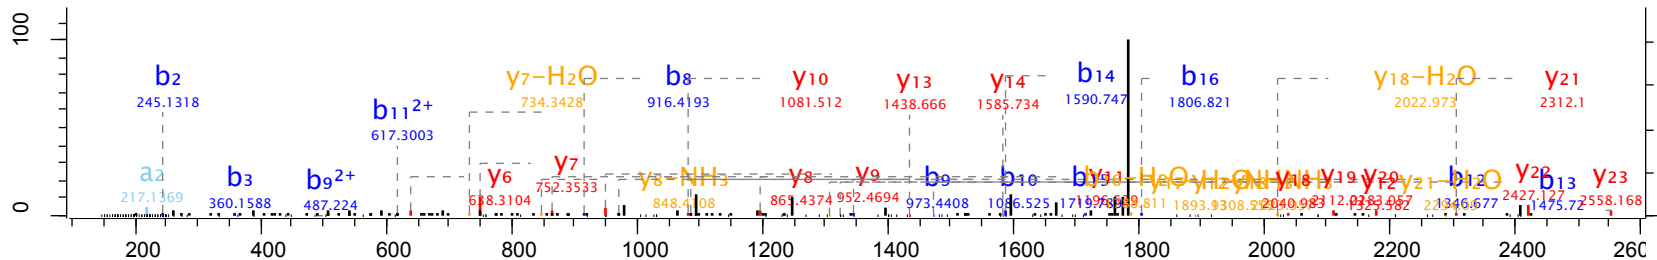

- I M D E A A E R G L F L E D E S L N S S R

y<sub>23</sub> y<sub>22</sub> y<sub>21</sub> y<sub>20</sub> y<sub>19</sub> y<sub>18</sub> y<sub>14</sub> y<sub>13</sub> y<sub>12</sub> y<sub>11</sub> y<sub>10</sub> y<sub>9</sub> y<sub>8</sub> y<sub>7</sub> y<sub>6</sub>  
b<sub>2</sub> b<sub>3</sub> b<sub>8</sub> b<sub>9</sub> b<sub>10</sub> b<sub>11</sub><sup>2+</sup> b<sub>12</sub> b<sub>13</sub> b<sub>14</sub> b<sub>15</sub> b<sub>16</sub>

[1e4]

| Raw file                           | Scan  | Method   | Score | m/z    | Gene names |
|------------------------------------|-------|----------|-------|--------|------------|
| 20150228_yeast1_Top_opt_B1_01_1611 | 41502 | TOF; CID | 84.36 | 752.41 | SNX41      |

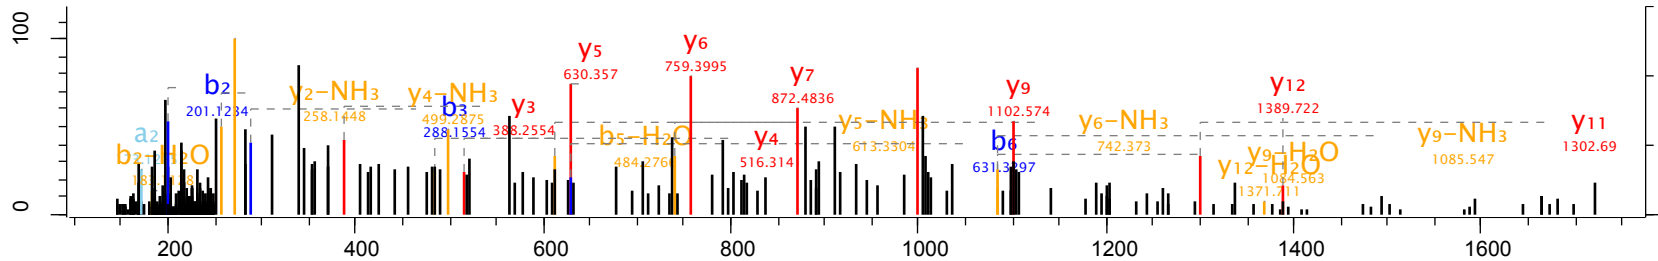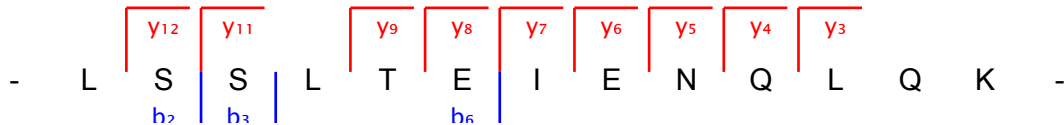

Raw file

20150228\_yeast1\_Top\_opt\_B1\_01\_1611

Scan

41882

Method

TOF; CID

Score

115.63

m/z

724.38

Gene names

COQ8

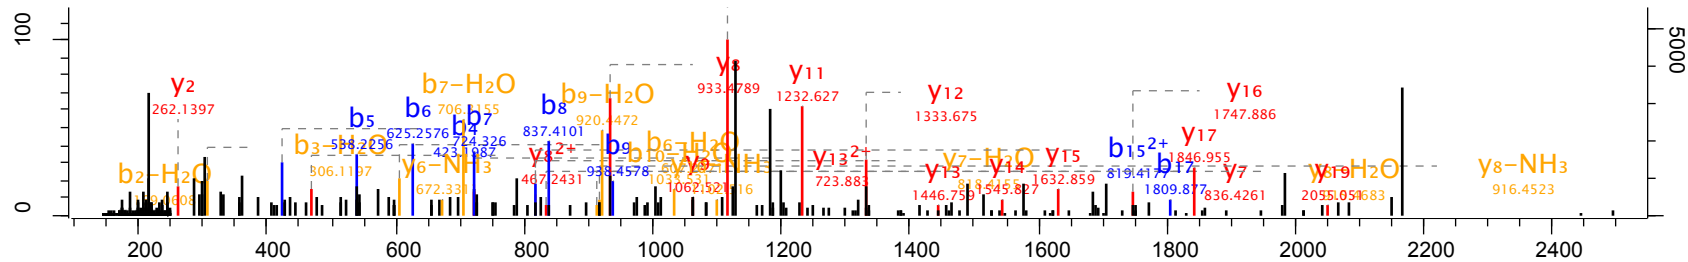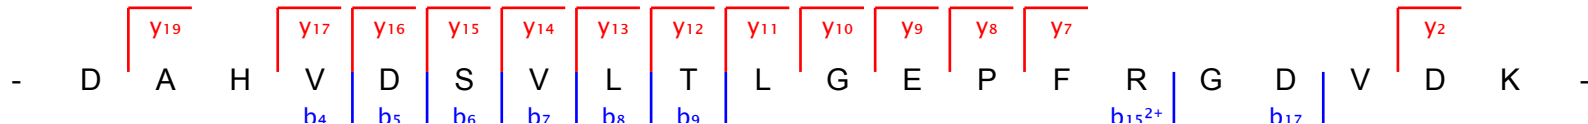

| Raw file                           | Scan  | Method   | Score | m/z    | Gene names |
|------------------------------------|-------|----------|-------|--------|------------|
| 20150228_yeast1_Top_opt_B1_01_1611 | 42753 | TOF; CID | 66.02 | 643.82 | UNG1       |

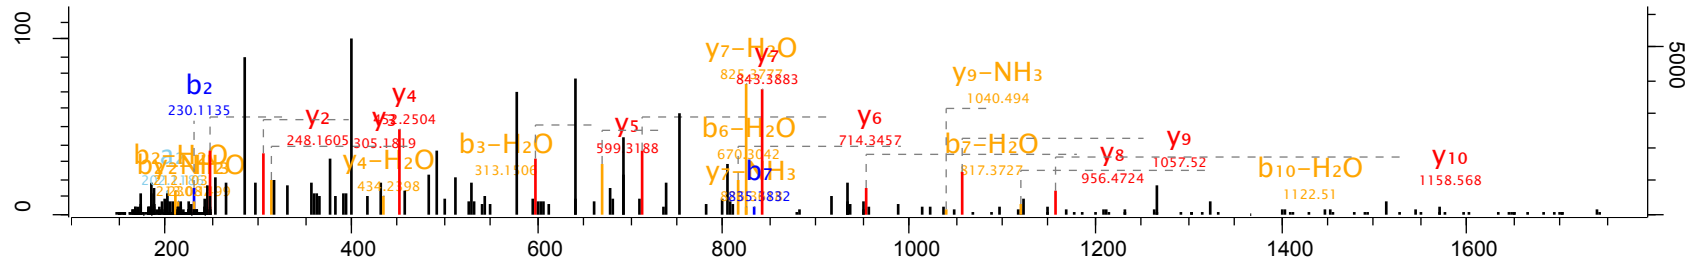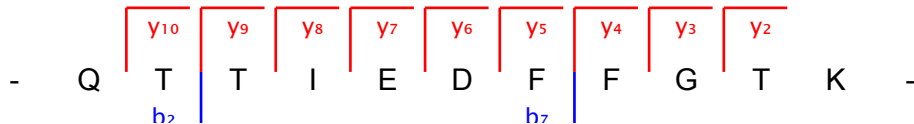

| Raw file                           | Scan  | Method   | Score | m/z    | Gene names |
|------------------------------------|-------|----------|-------|--------|------------|
| 20150228_yeast1_Top_opt_B1_01_1611 | 43277 | TOF; CID | 93.1  | 564.34 | PGD1       |

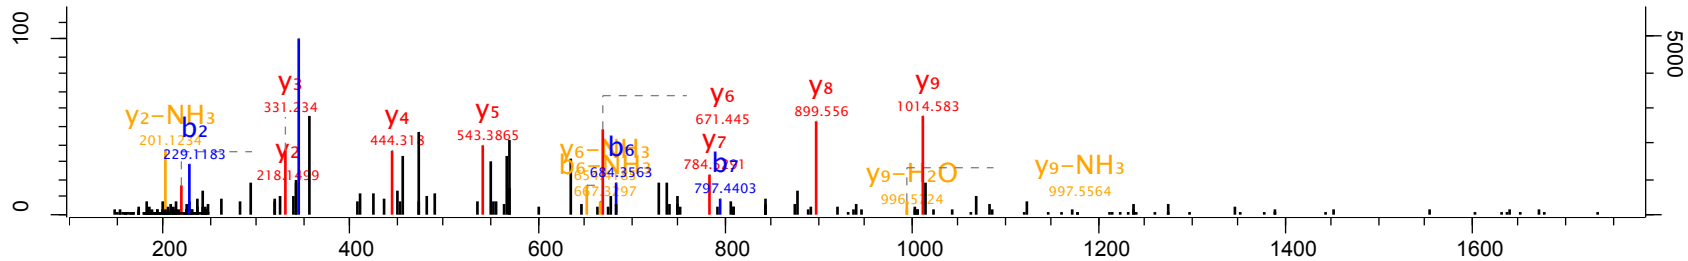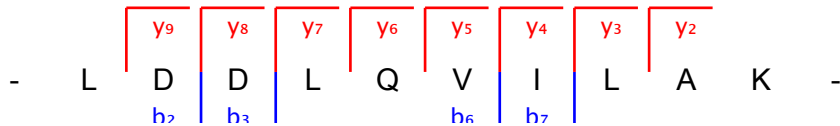

| Raw file                           | Scan  | Method   | Score | m/z    | Gene names |
|------------------------------------|-------|----------|-------|--------|------------|
| 20150228_yeast1_Top_opt_B1_01_1611 | 43494 | TOF; CID | 93.37 | 936.04 | PBP2       |

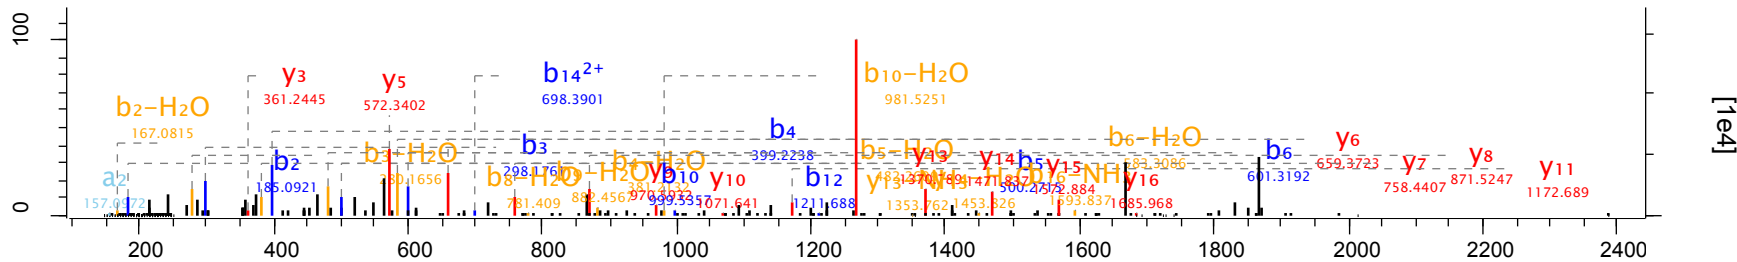

- P S I T T T P T T V L V S P N T L K -  
 b<sub>2</sub> b<sub>3</sub> b<sub>4</sub> b<sub>5</sub> b<sub>6</sub> b<sub>10</sub> b<sub>12</sub> b<sub>14</sub><sup>2+</sup>  
 y<sub>16</sub> y<sub>15</sub> y<sub>14</sub> y<sub>13</sub> y<sub>12</sub> y<sub>11</sub> y<sub>10</sub> y<sub>9</sub> y<sub>8</sub> y<sub>7</sub> y<sub>6</sub> y<sub>5</sub> y<sub>3</sub>



| Raw file                           | Scan  | Method   | Score | m/z    | Gene names |
|------------------------------------|-------|----------|-------|--------|------------|
| 20150228_yeast1_Top_opt_B1_01_1611 | 43521 | TOF; CID | 78.9  | 605.38 | SAN1       |

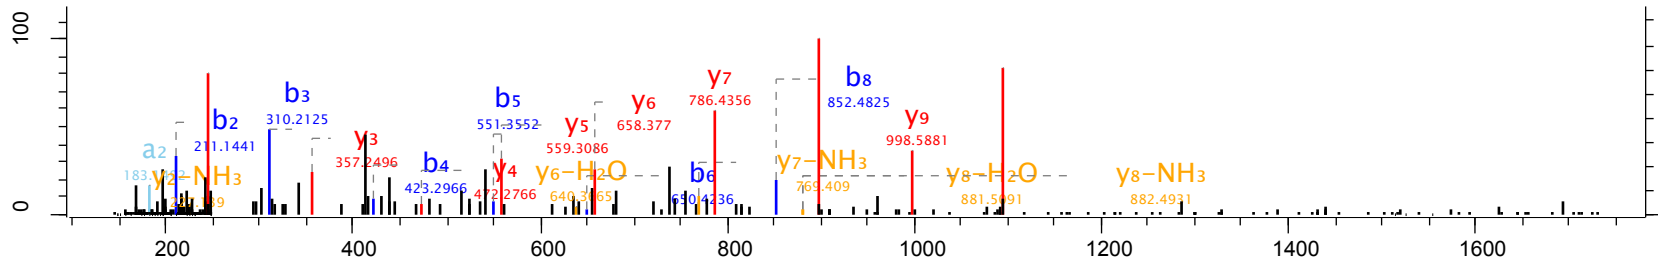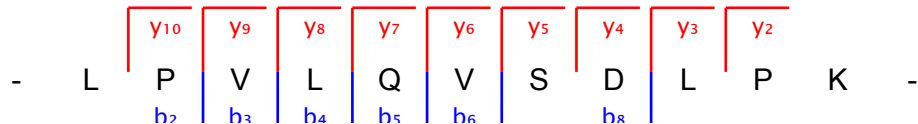

Raw file

Scan

Method

Score

m/z

Gene names

20150228\_yeast1\_Top\_opt\_B1\_01\_1611

43567

TOF; CID

127.3

968.5

ARP1

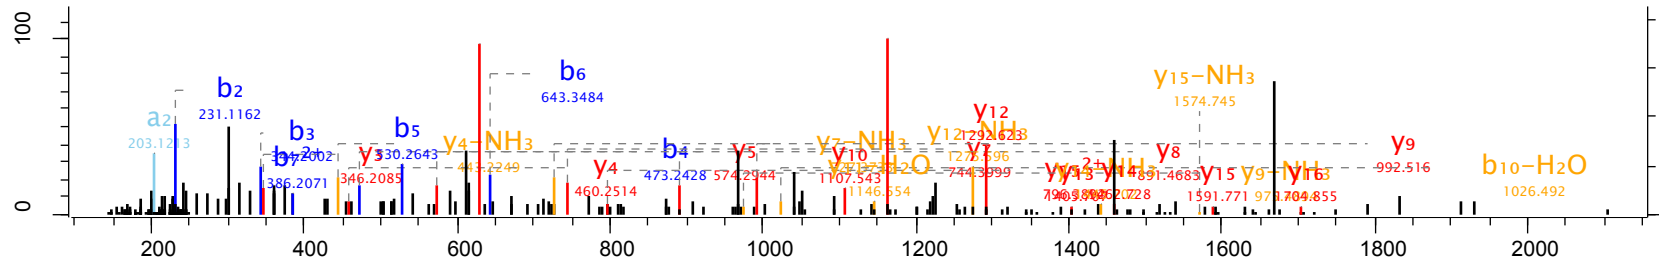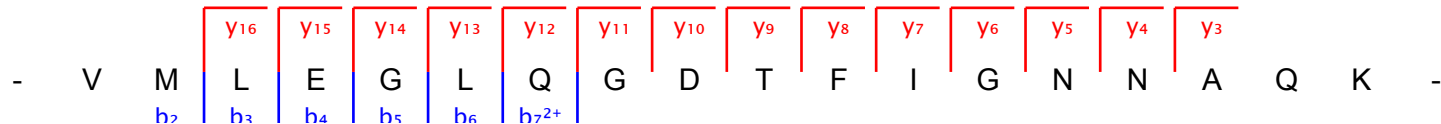

| Raw file                           | Scan  | Method   | Score  | m/z     | Gene names |
|------------------------------------|-------|----------|--------|---------|------------|
| 20150228_yeast1_Top_opt_B1_01_1611 | 43844 | TOF; CID | 121.21 | 1176.09 | EMC6       |

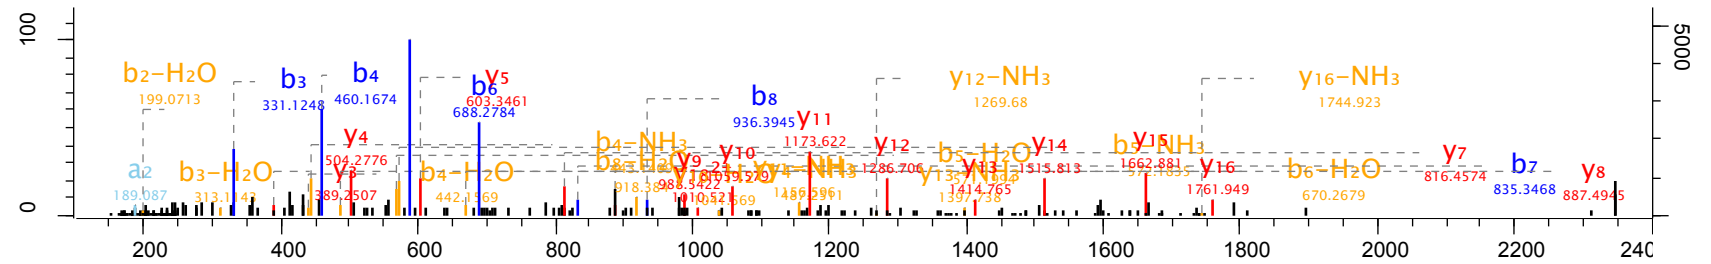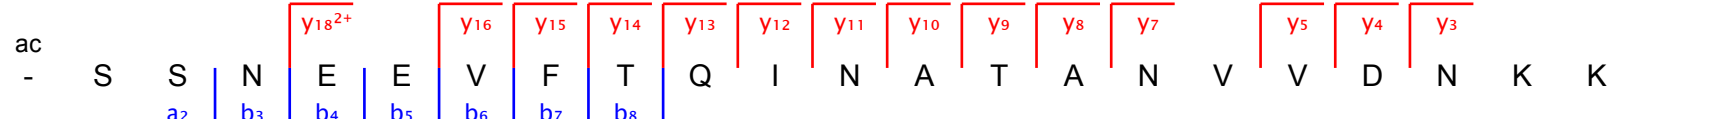

| Raw file                           | Scan  | Method   | Score | m/z    | Gene names |
|------------------------------------|-------|----------|-------|--------|------------|
| 20150228_yeast1_Top_opt_B1_01_1611 | 44142 | TOF; CID | 80.23 | 568.34 | NCE101     |

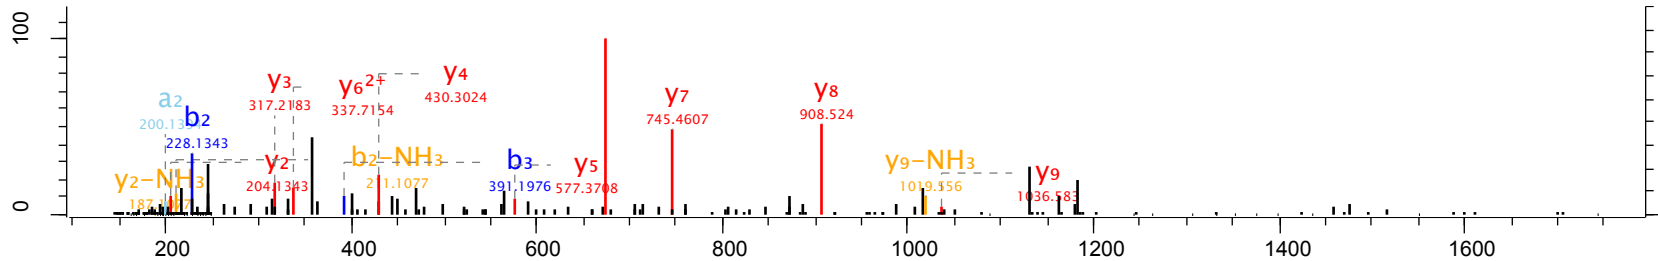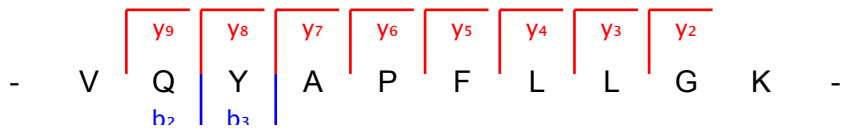

Raw file

Scan

Method

Score

m/z

Gene names

20150228\_yeast1\_Top\_opt\_B1\_01\_1611

44452

TOF; CID

102.21

1147.62

TPO2

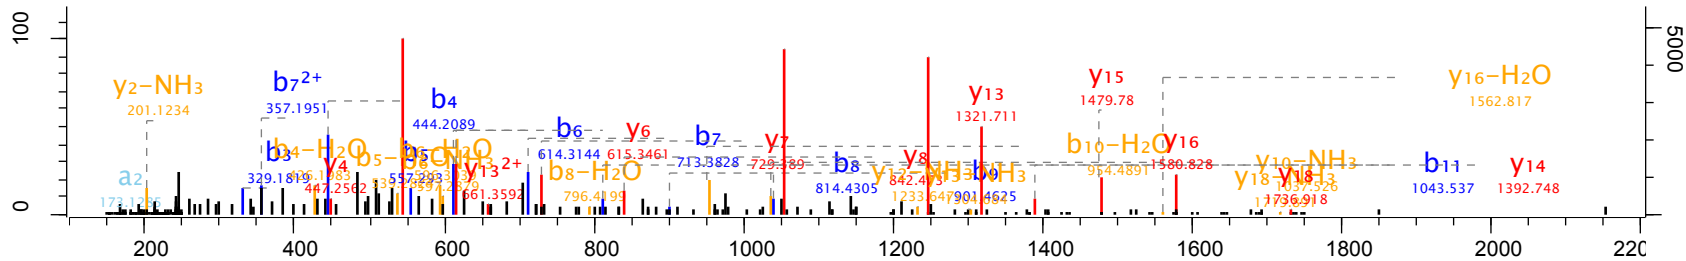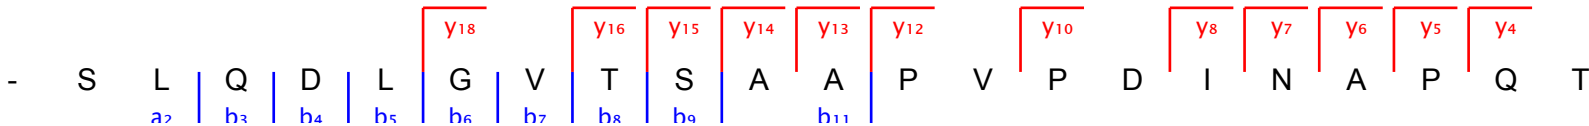

| Raw file                           | Scan  | Method   | Score | m/z    | Gene names |
|------------------------------------|-------|----------|-------|--------|------------|
| 20150228_yeast1_Top_opt_B1_01_1611 | 45490 | TOF; CID | 51.47 | 1106.5 | MGA2       |

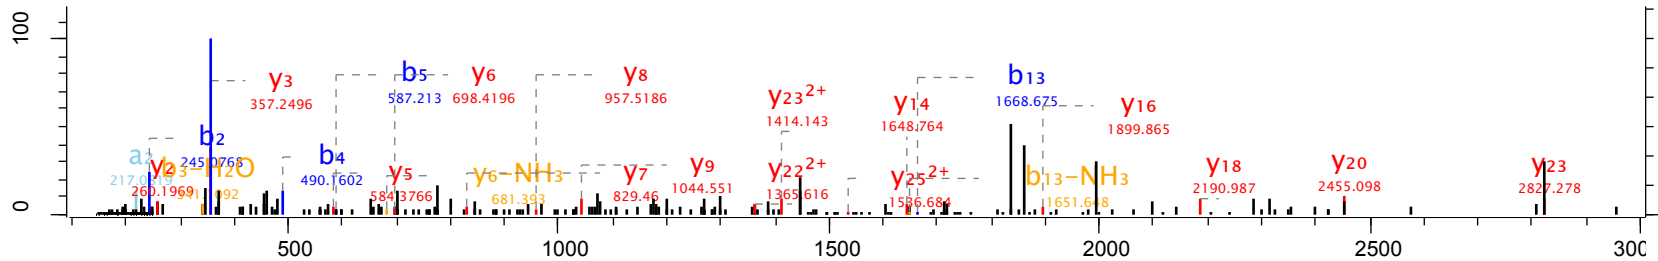

- D E N M P F Q Y T Y Q H N P Y D N D S Q M  
   b<sub>2</sub> b<sub>3</sub> b<sub>4</sub> b<sub>5</sub> b<sub>13</sub>  
   y<sub>25</sub><sup>2+</sup> y<sub>23</sub> y<sub>22</sub><sup>2+</sup> y<sub>20</sub> y<sub>18</sub> y<sub>16</sub> y<sub>14</sub> y<sub>9</sub> y<sub>8</sub> y<sub>7</sub>

| Raw file                           | Scan  | Method   | Score | m/z    | Gene names |
|------------------------------------|-------|----------|-------|--------|------------|
| 20150228_yeast1_Top_opt_B1_01_1611 | 45607 | TOF; CID | 59.25 | 767.41 | SPP2       |

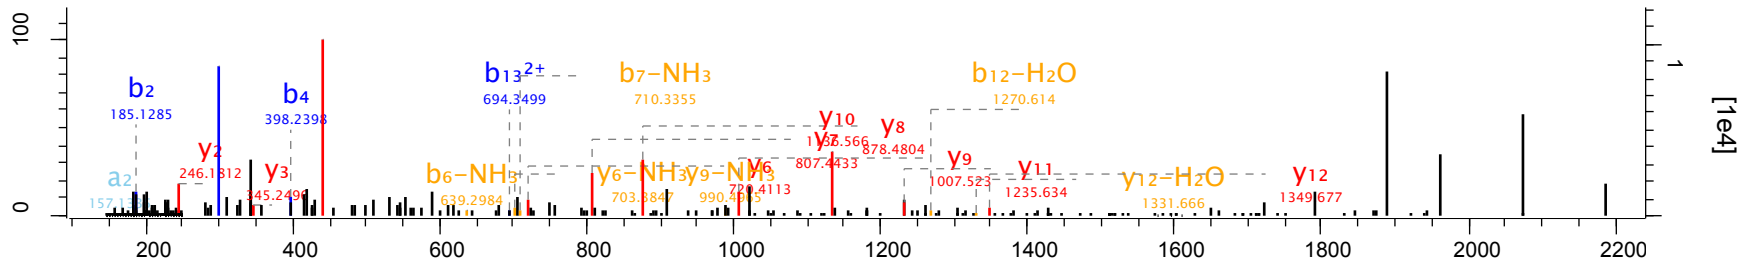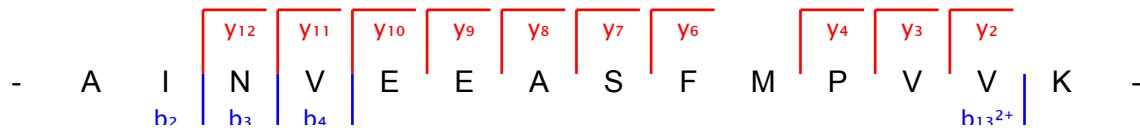

| Raw file                           | Scan  | Method   | Score | m/z     | Gene names |
|------------------------------------|-------|----------|-------|---------|------------|
| 20150228_yeast1_Top_opt_B1_01_1611 | 46040 | TOF; CID | 99.41 | 1046.98 | TOM6       |

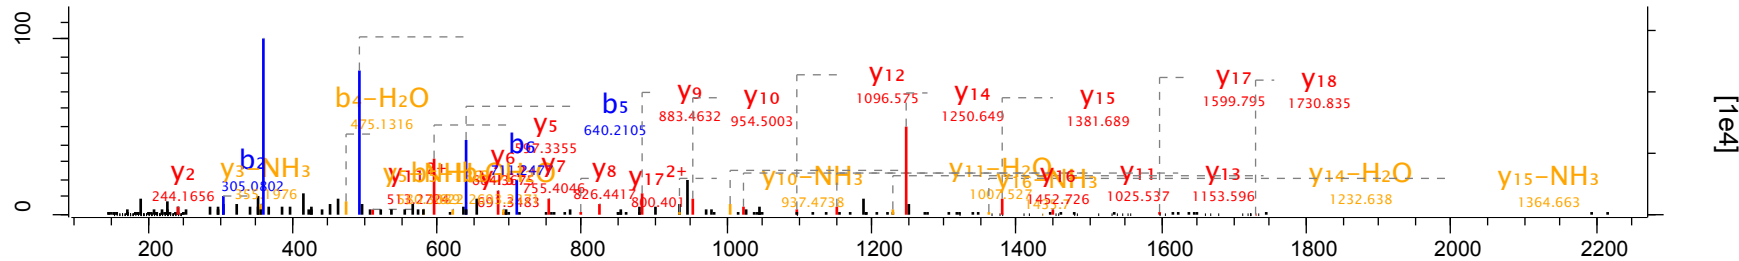

| ac | ox | Sequence       |                |                 |                 |                 |                 |                 |                 |                 |                 |                 |                |                |                |                |                |   |   |                |   |
|----|----|----------------|----------------|-----------------|-----------------|-----------------|-----------------|-----------------|-----------------|-----------------|-----------------|-----------------|----------------|----------------|----------------|----------------|----------------|---|---|----------------|---|
| -  | M  | D              | G              | M               | F               | A               | M               | P               | G               | A               | A               | A               | G              | A              | A              | S              | P              | Q | Q | P              | K |
|    |    | b <sub>2</sub> | b <sub>3</sub> | b <sub>4</sub>  | b <sub>5</sub>  | b <sub>6</sub>  |                 |                 |                 |                 |                 |                 |                |                |                |                |                |   |   |                |   |
|    |    |                |                | y <sub>18</sub> | y <sub>17</sub> | y <sub>16</sub> | y <sub>15</sub> | y <sub>14</sub> | y <sub>13</sub> | y <sub>12</sub> | y <sub>11</sub> | y <sub>10</sub> | y <sub>9</sub> | y <sub>8</sub> | y <sub>7</sub> | y <sub>6</sub> | y <sub>5</sub> |   |   | y <sub>2</sub> |   |



| Raw file                           | Scan  | Method   | Score | m/z    | Gene names |
|------------------------------------|-------|----------|-------|--------|------------|
| 20150228_yeast1_Top_opt_B1_01_1611 | 47434 | TOF; CID | 44.83 | 704.39 | CPT1       |

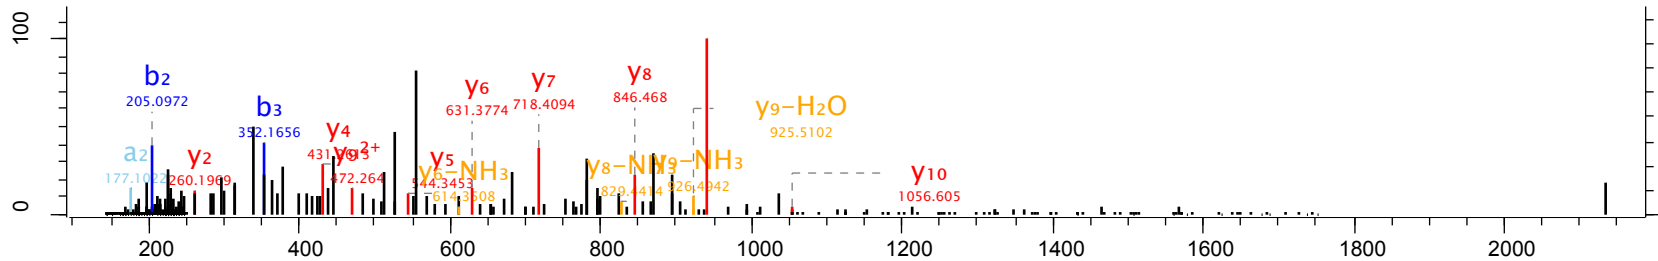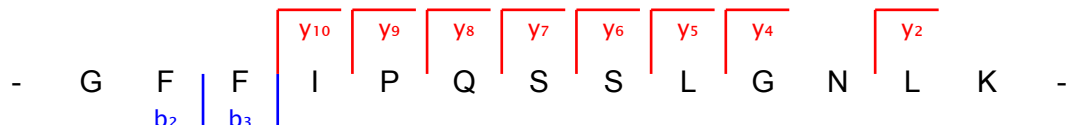

Raw file

Scan

Method

Score

m/z

Gene names

20150228\_yeast1\_Top\_opt\_B1\_01\_1611

47520

TOF; CID

153.82

963.79

NHX1

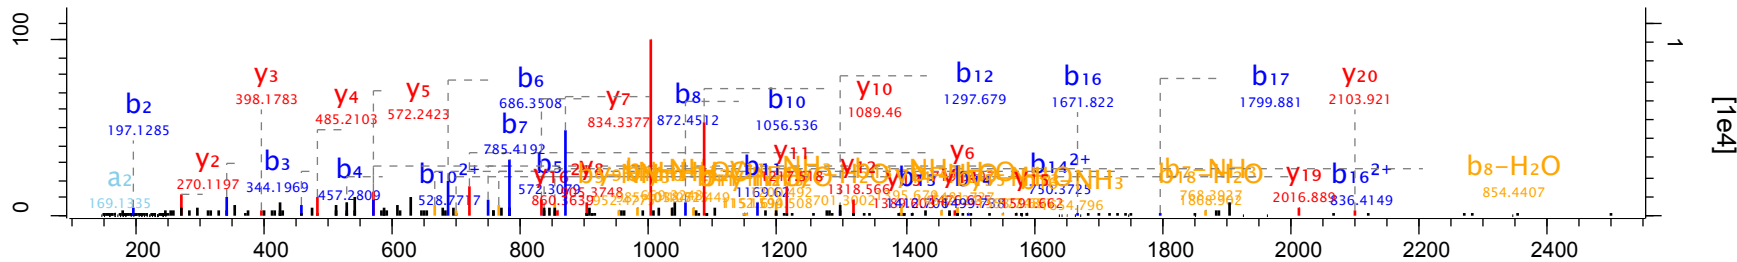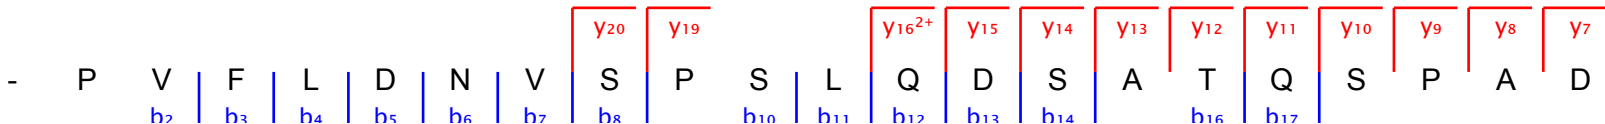

Raw file

Scan

Method

Score

m/z

Gene names

20150228\_yeast1\_Top\_opt\_B1\_01\_1611

47983

TOF; CID

97.9

600.69

TUS1

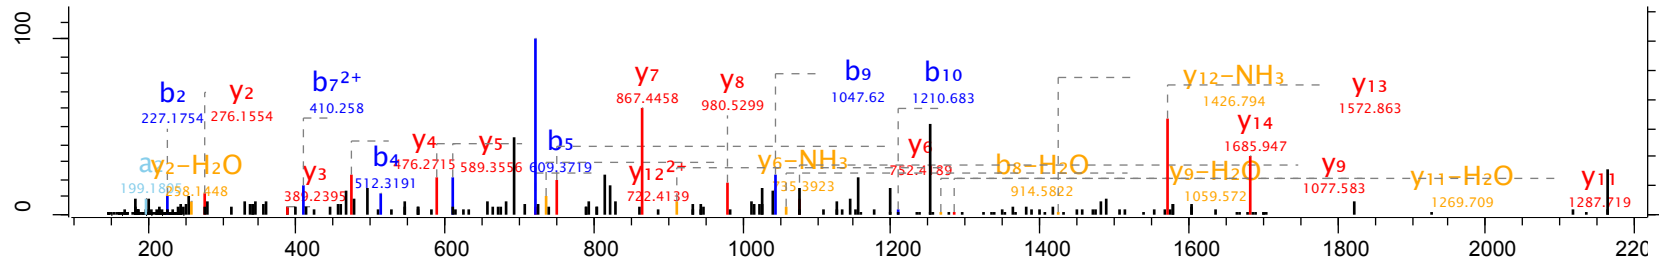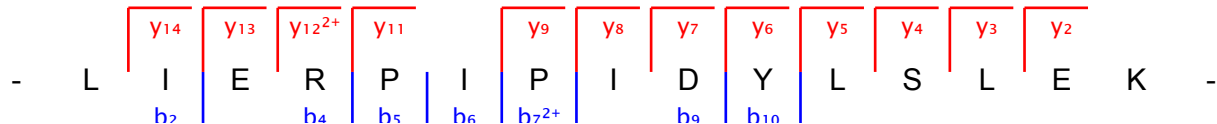

| Raw file                           | Scan  | Method   | Score | m/z    | Gene names |
|------------------------------------|-------|----------|-------|--------|------------|
| 20150228_yeast1_Top_opt_B1_01_1611 | 49998 | TOF; CID | 55.46 | 531.33 | POF1       |

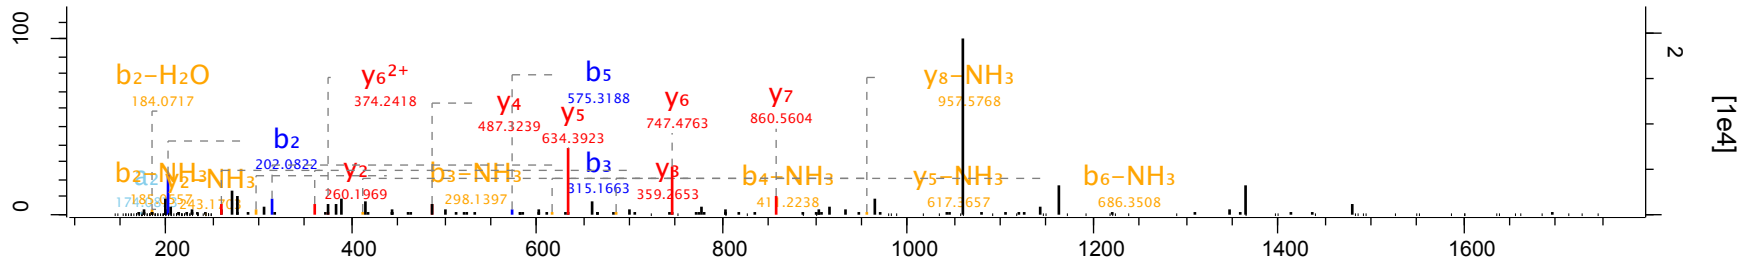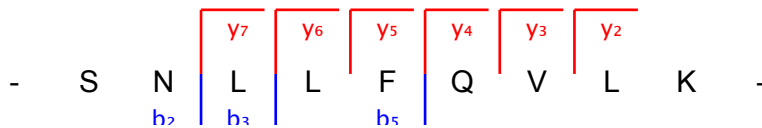

Raw file

Scan

Method

Score

m/z

Gene names

20150228\_yeast1\_Top\_opt\_B1\_01\_1611

50700

TOF; CID

66.02

721.92

YLR352W

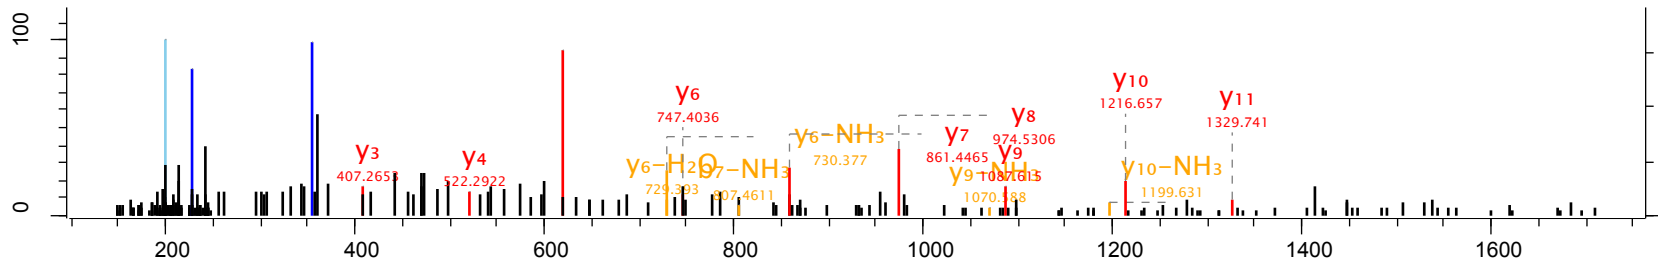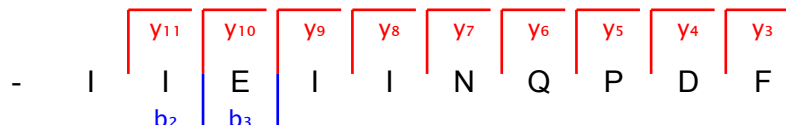

| Raw file                           | Scan  | Method   | Score | m/z     | Gene names |
|------------------------------------|-------|----------|-------|---------|------------|
| 20150228_yeast1_Top_opt_B1_01_1611 | 52159 | TOF; CID | 79.59 | 1340.29 | TLG1       |

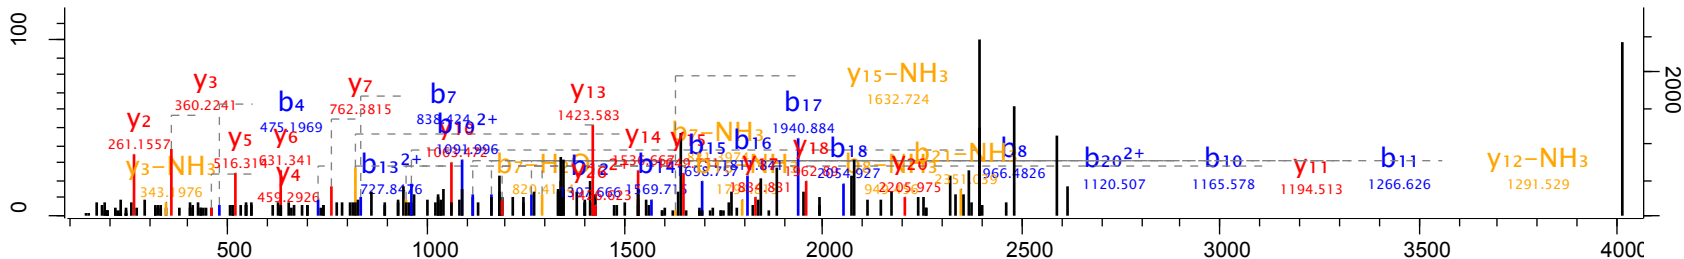

- T M Q N | L H I | Q | A Q T | M G | D E | L E | N Q | G | Q

*Annotations below sequence:*  
b<sub>4</sub>
b<sub>7</sub>
b<sub>8</sub>
b<sub>10</sub>
y<sub>26</sub><sup>2+</sup>
b<sub>11</sub>
b<sub>12</sub>
b<sub>13</sub><sup>2+</sup>
b<sub>14</sub>
b<sub>15</sub>
b<sub>16</sub>
y<sub>20</sub>
b<sub>17</sub>
b<sub>18</sub>
y<sub>18</sub>
b<sub>19</sub><sup>2+</sup>
y<sub>17</sub>
b<sub>20</sub><sup>2+</sup>

Raw file

Scan

Method

Score

m/z

Gene names

20150228\_yeast1\_Top\_opt\_B1\_01\_1611

53217

TOF; CID

60.27

814.13

SNF11

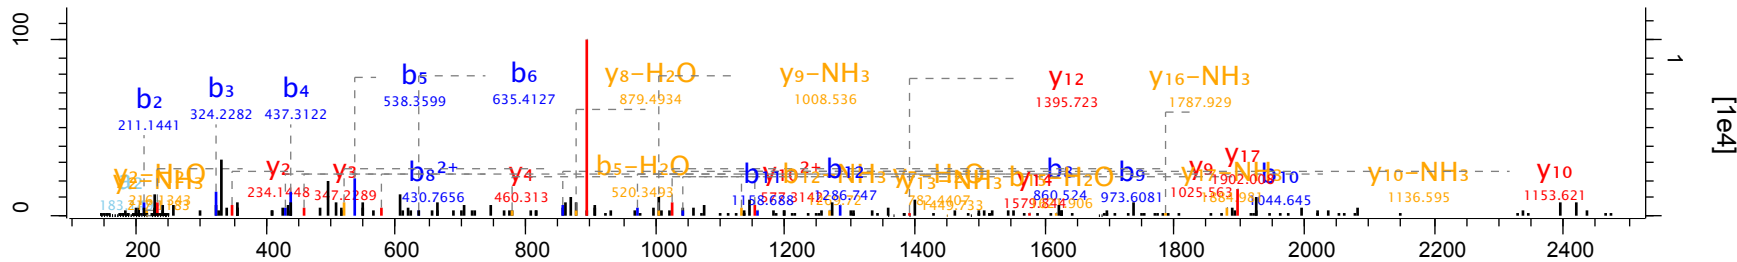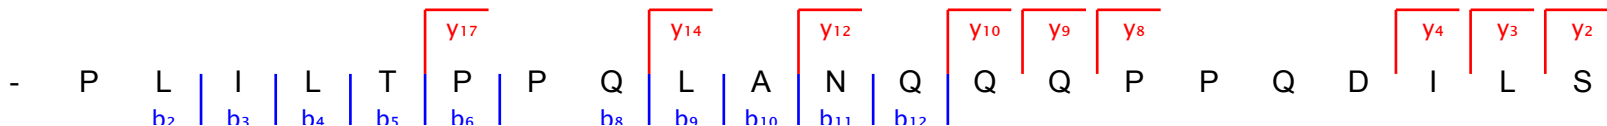

| Raw file                           | Scan  | Method   | Score | m/z    | Gene names |
|------------------------------------|-------|----------|-------|--------|------------|
| 20150228_yeast1_Top_opt_B1_01_1611 | 53522 | TOF; CID | 66.94 | 658.34 | YPL108W    |

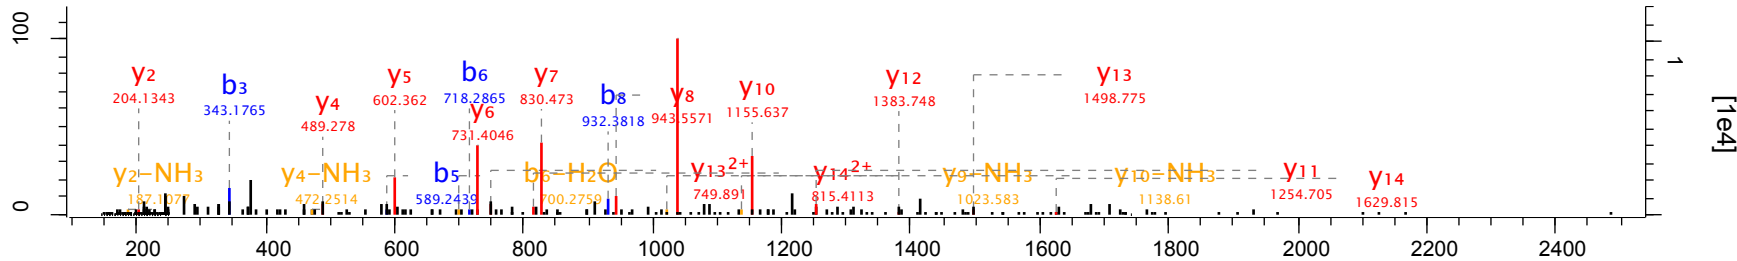

- V G W M D E V D P L V E I R E G K -  
 b<sub>3</sub> h<sub>5</sub> h<sub>6</sub> h<sub>8</sub>  
 y<sub>14</sub> y<sub>13</sub> y<sub>12</sub> y<sub>11</sub> y<sub>10</sub> y<sub>9</sub> y<sub>8</sub> y<sub>7</sub> y<sub>6</sub> y<sub>5</sub> y<sub>4</sub> y<sub>2</sub>



Raw file

Scan

Method

Score

m/z

Gene names

20150228\_yeast1\_Top\_opt\_B1\_01\_1611

55386

TOF; CID

88.57

962.49

IMP2'

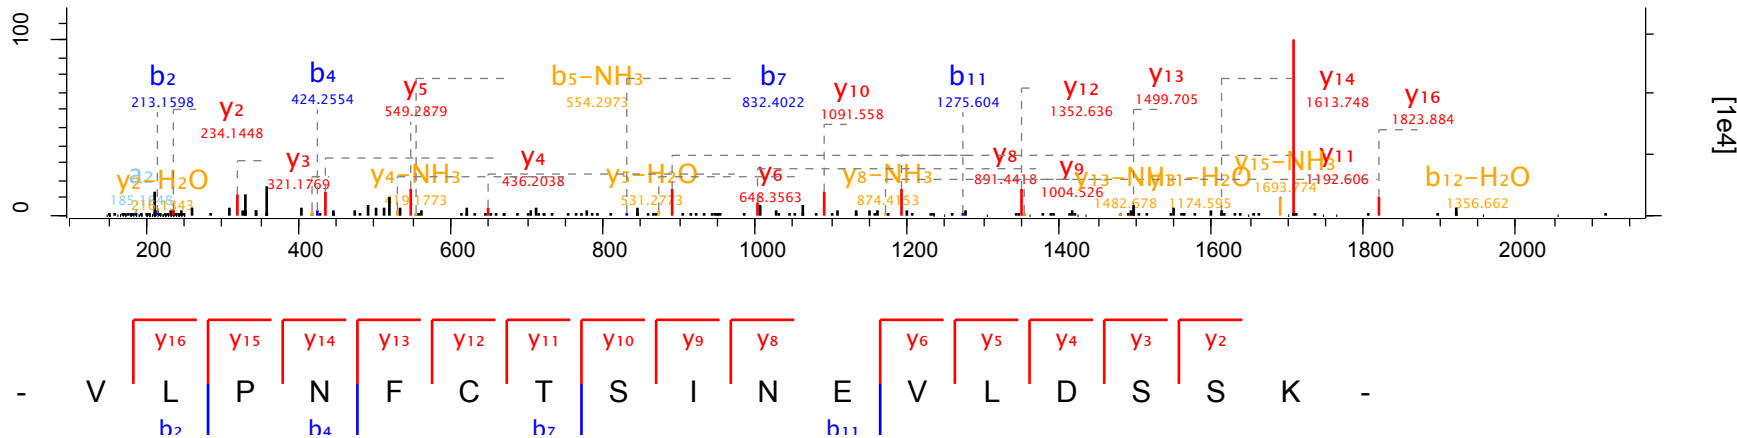

Raw file

20150228\_yeast1\_Top\_opt\_B1\_01\_1611

Scan

56027

Method

TOF; CID

Score

36.33

m/z

963.5

Gene names

ISM1

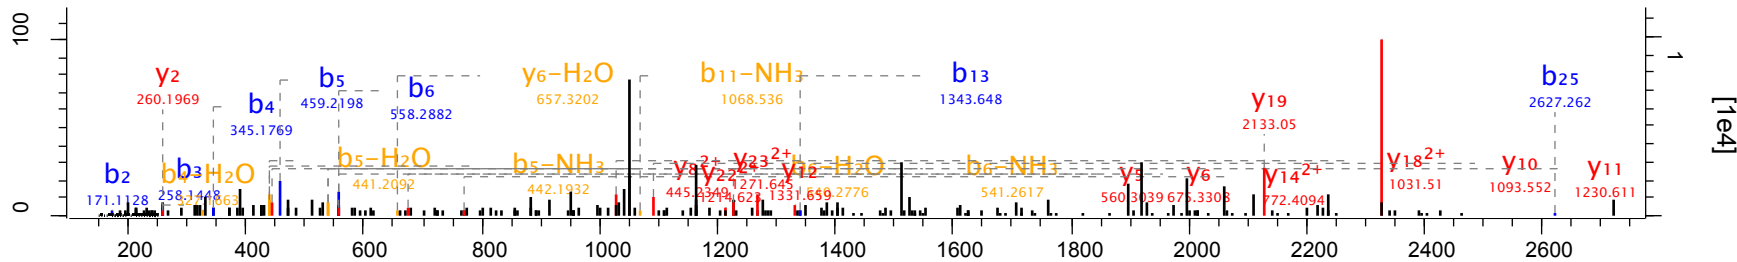

- V A S S N V P V A P Y E E V I T H G F T L

b<sub>2</sub> b<sub>3</sub> b<sub>4</sub> b<sub>5</sub> b<sub>6</sub> b<sub>13</sub> y<sub>23</sub><sup>2+</sup> y<sub>22</sub><sup>2+</sup> y<sub>21</sub> y<sub>19</sub> y<sub>18</sub><sup>2+</sup> y<sub>14</sub><sup>2+</sup> y<sub>12</sub> y<sub>11</sub> y<sub>10</sub> y<sub>8</sub><sup>2+</sup>

| Raw file                           | Scan  | Method   | Score | m/z    | Gene names |
|------------------------------------|-------|----------|-------|--------|------------|
| 20150228_yeast1_Top_opt_B1_01_1611 | 56042 | TOF; CID | 68.04 | 835.43 | NPR2       |

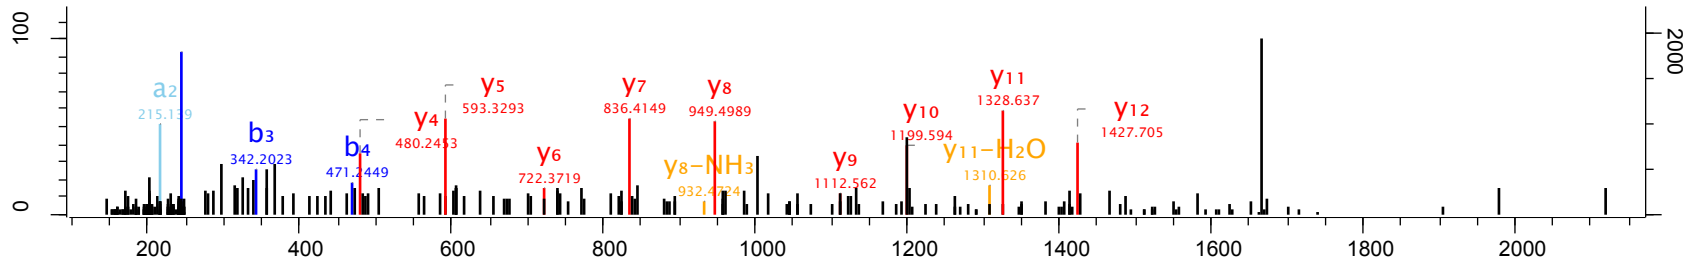

- L E V E S Y L N E L G E F K -  
 b2 b3 b4

y12 y11 y10 y9 y8 y7 y6 y5 y4

Raw file

Scan

Method

Score

m/z

Gene names

20150228\_yeast1\_Top\_opt\_B1\_01\_1611

57178

TOF; CID

81.63

813.46

MRS1

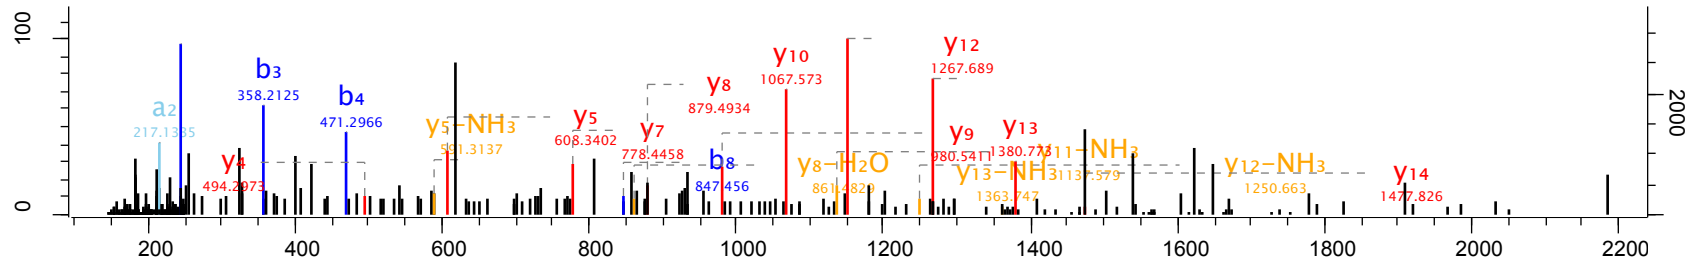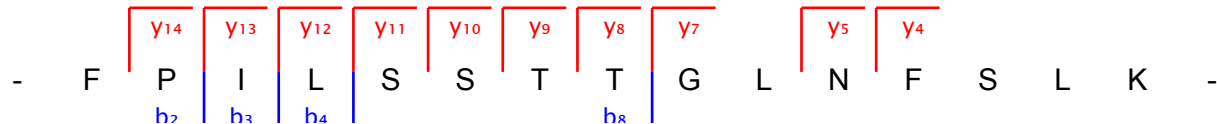

| Raw file                           | Scan  | Method   | Score | m/z     | Gene names |
|------------------------------------|-------|----------|-------|---------|------------|
| 20150228_yeast1_Top_opt_B1_01_1611 | 57355 | TOF; CID | 34.32 | 1018.53 | OSW5       |

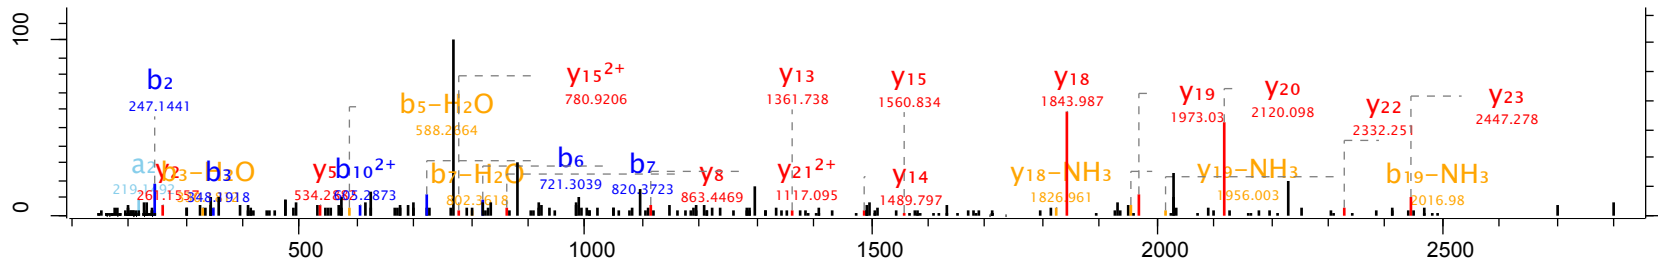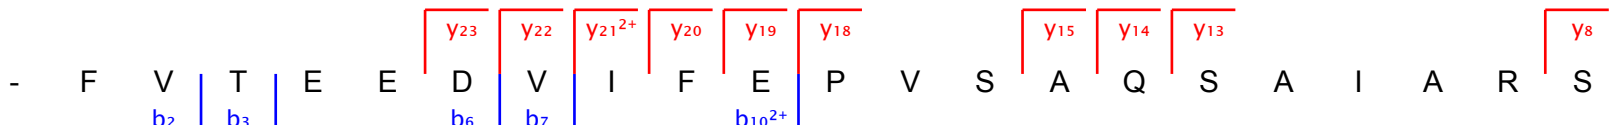

| Raw file                           | Scan  | Method   | Score | m/z    | Gene names |
|------------------------------------|-------|----------|-------|--------|------------|
| 20150228_yeast1_Top_opt_B1_01_1611 | 57697 | TOF; CID | 108.7 | 607.88 | YIF1       |

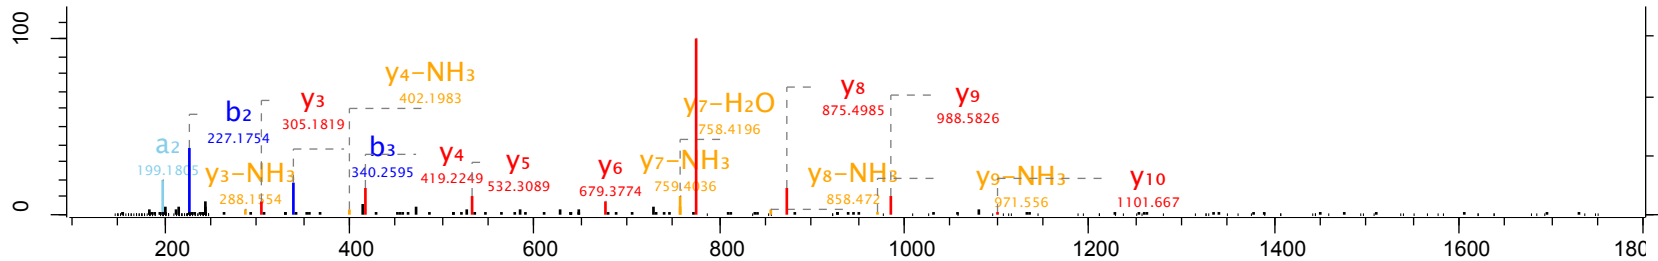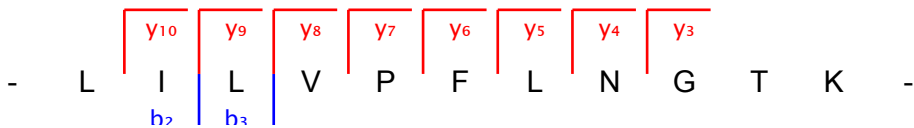

[1e4]

| Raw file                           | Scan  | Method   | Score | m/z    | Gene names |
|------------------------------------|-------|----------|-------|--------|------------|
| 20150228_yeast1_Top_opt_B1_01_1611 | 58152 | TOF; CID | 73.44 | 696.38 | MSG5       |

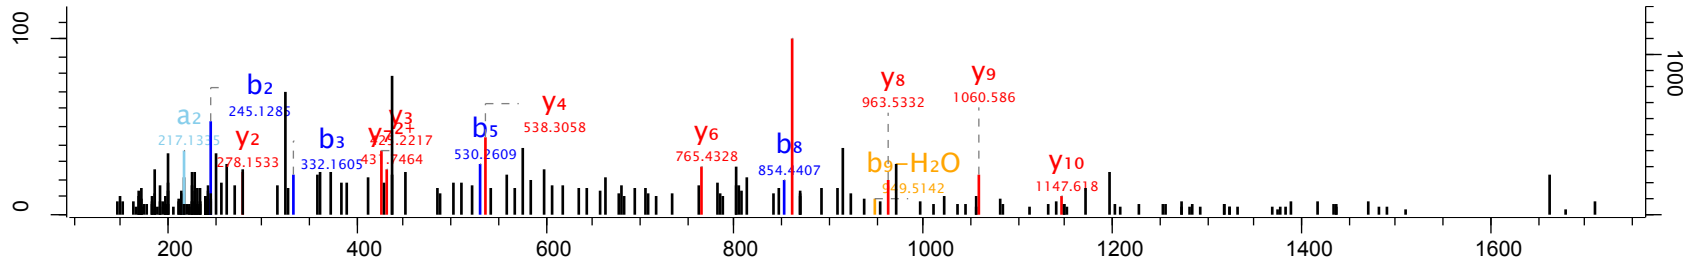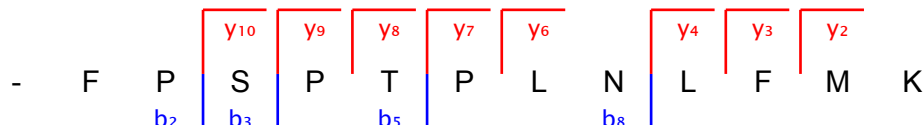

Raw file

Scan

Method

Score

m/z

Gene names

20150228\_yeast1\_Top\_opt\_B1\_01\_1611

59568

TOF; CID

93.58

792.08

SAP30

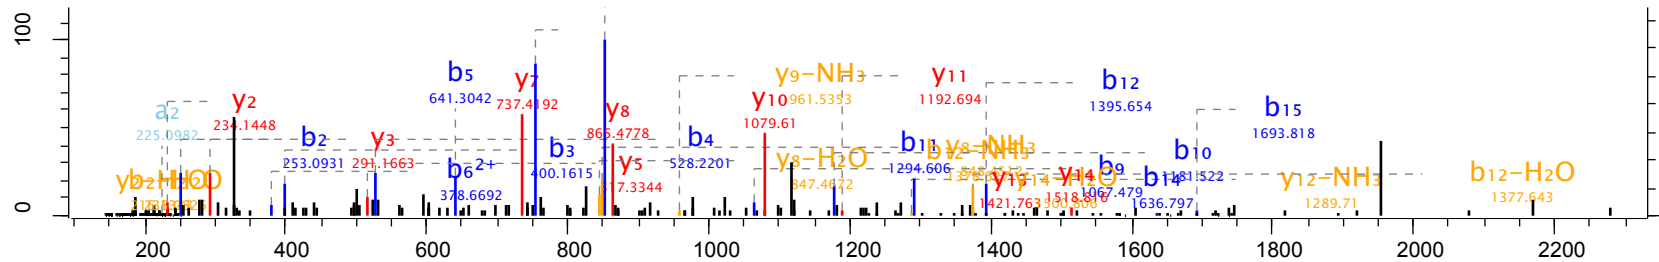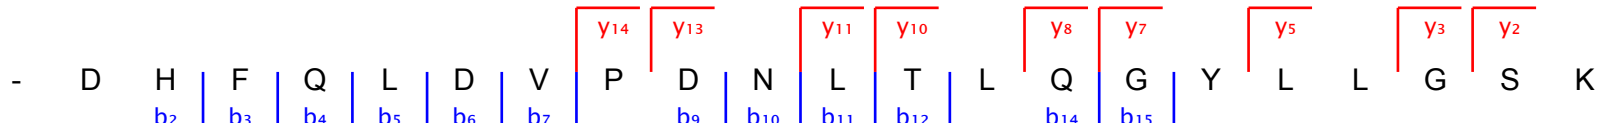



Raw file

Scan

Method

Score

m/z

Gene names

20150228\_yeast1\_Top\_opt\_B1\_01\_1611

60755

TOF; CID

49.09

1144.55

TAD2

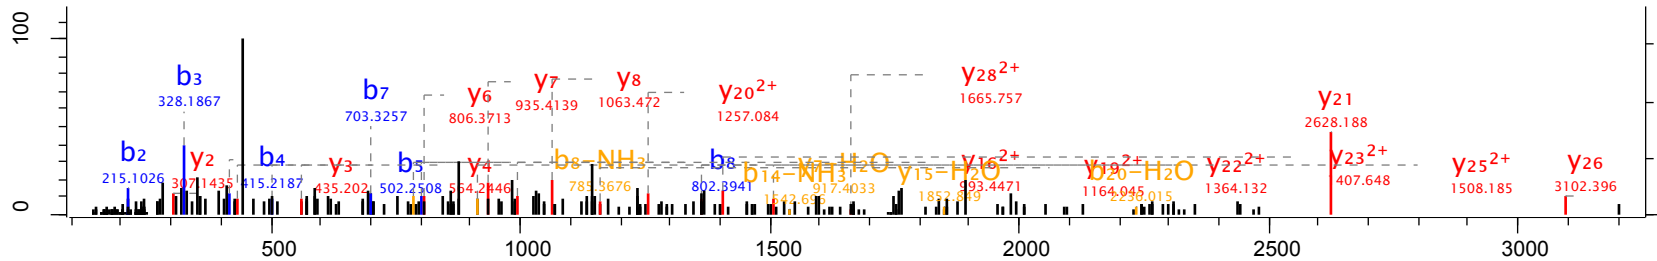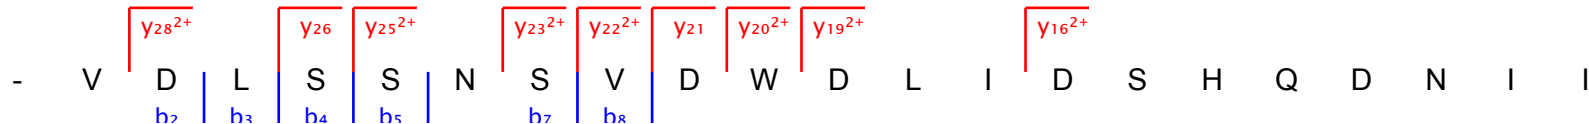

Raw file

Scan

Method

Score

m/z

Gene names

20150228\_yeast1\_Top\_opt\_B1\_01\_1611

61265

TOF; CID

54.93

1084.92

GIS3

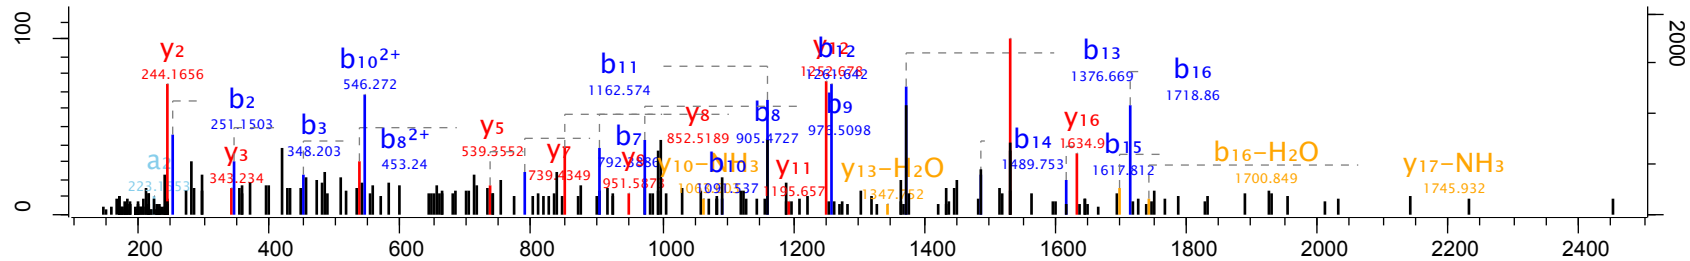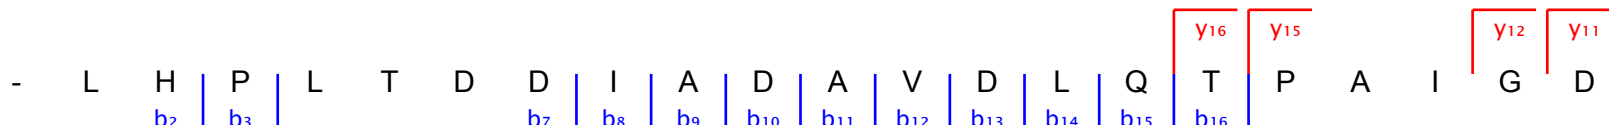

Raw file

Scan

Method

Score

m/z

Gene names

20150228\_yeast1\_Top\_opt\_B1\_01\_1611

61837

TOF; CID

79.64

643.4

TAH11

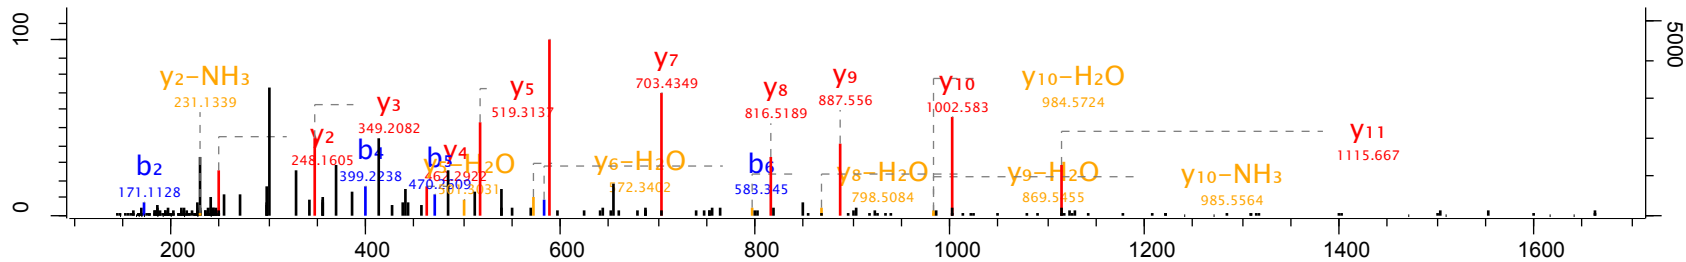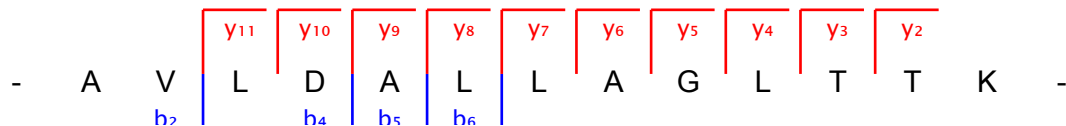

Raw file

Scan

Method

Score

m/z

Gene names

20150228\_yeast1\_Top\_opt\_B1\_01\_1611

61946

TOF; CID

105.9

1095.02

MRPL36

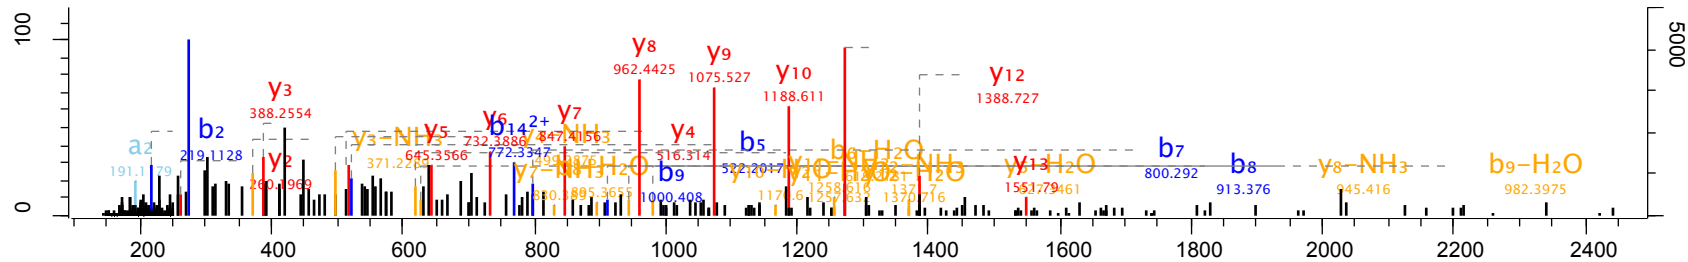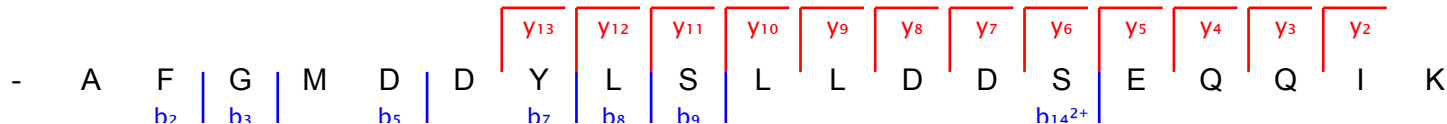

| Raw file                           | Scan  | Method   | Score  | m/z    | Gene names |
|------------------------------------|-------|----------|--------|--------|------------|
| 20150228_yeast1_Top_opt_B1_01_1611 | 62161 | TOF; CID | 130.21 | 883.46 | PUP3       |

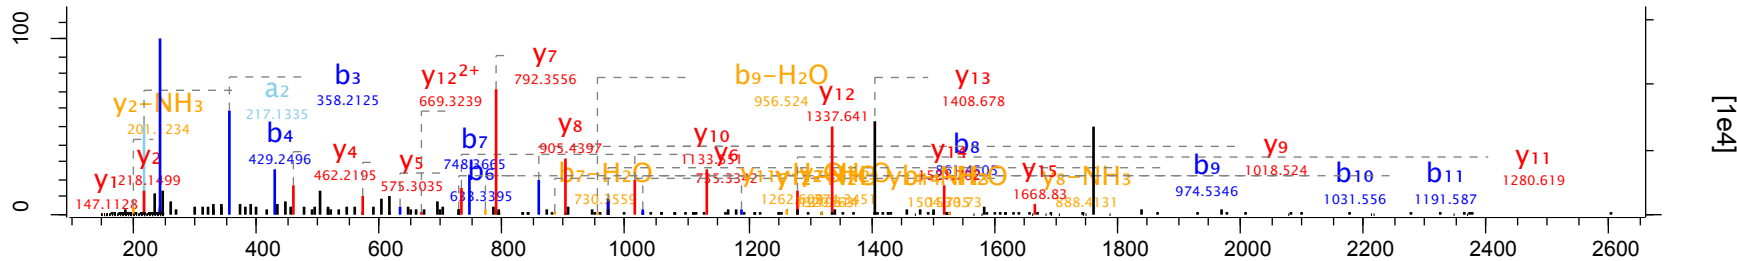

- P F I A G F D L I G C I D E A K -

y15 y14 y13 y12 y11 y10 y9 y8 y7 y6 y5 y4 y2 y1  
b2 b3 b4 b6 b7 b8 b9 b10 b11

| Raw file                           | Scan  | Method   | Score | m/z    | Gene names |
|------------------------------------|-------|----------|-------|--------|------------|
| 20150228_yeast1_Top_opt_B1_01_1611 | 63266 | TOF; CID | 51.32 | 808.94 | MOB2       |

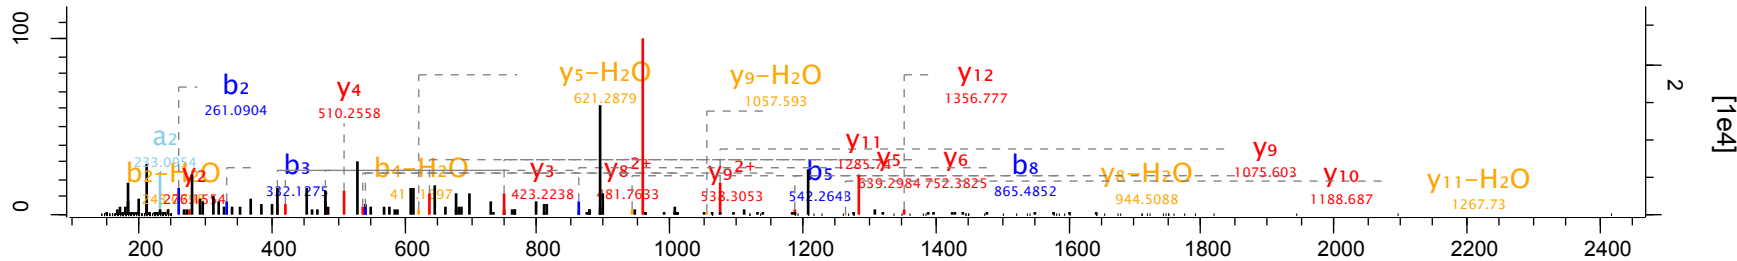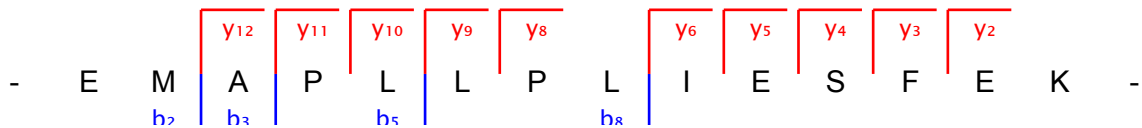

Raw file

20150228\_yeast1\_Top\_opt\_B1\_01\_1611

Scan

63758

Method

TOF; CID

Score

195.02

m/z

1015.08

Gene names

SRP21

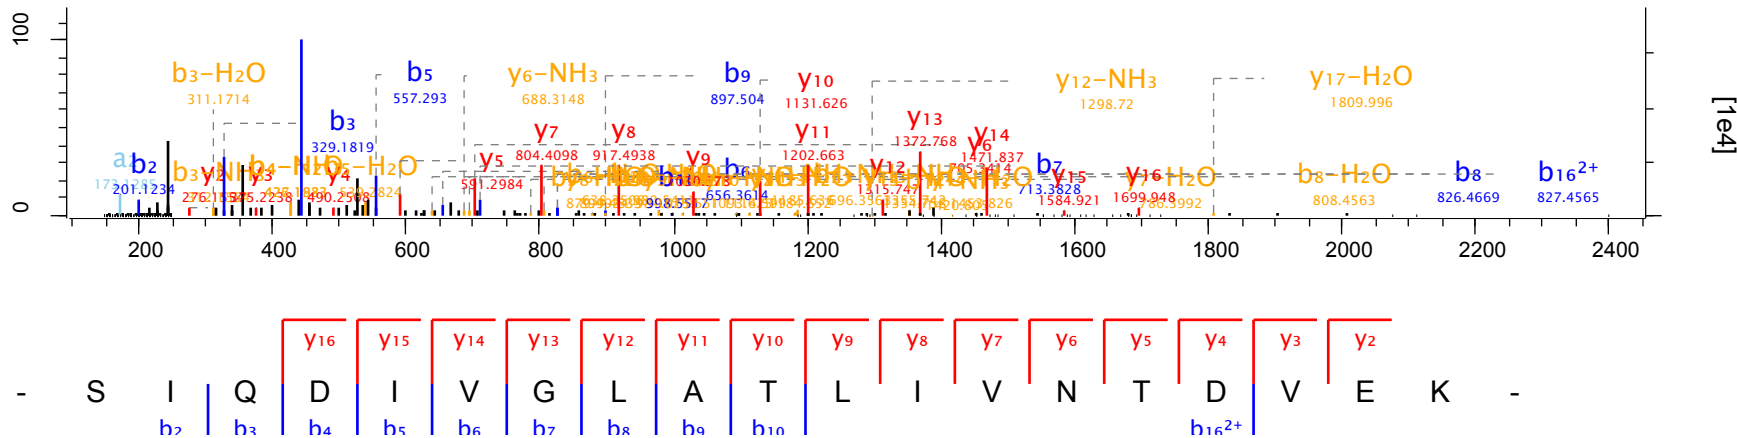

| Raw file                           | Scan | Method   | Score | m/z    | Gene names |
|------------------------------------|------|----------|-------|--------|------------|
| 20150228_yeast1_Top_opt_B1_01_1614 | 2921 | TOF; CID | 60.79 | 364.68 | MRPL7      |

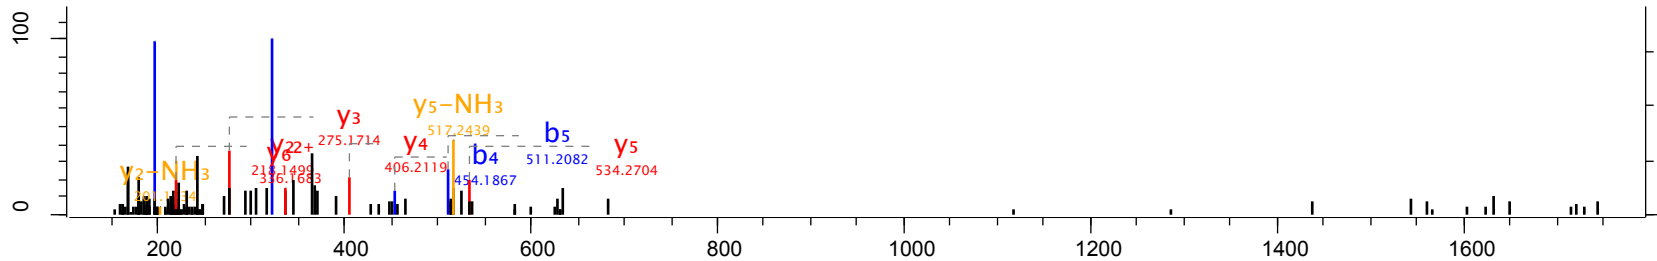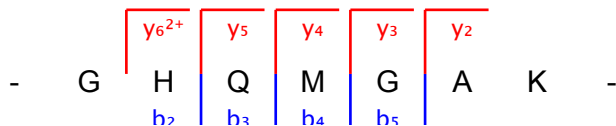



Raw file

Scan

Method

Score

m/z

Gene names

20150228\_yeast1\_Top\_opt\_B1\_01\_1614

4200

TOF; CID

82.61

654.31

YMR295C

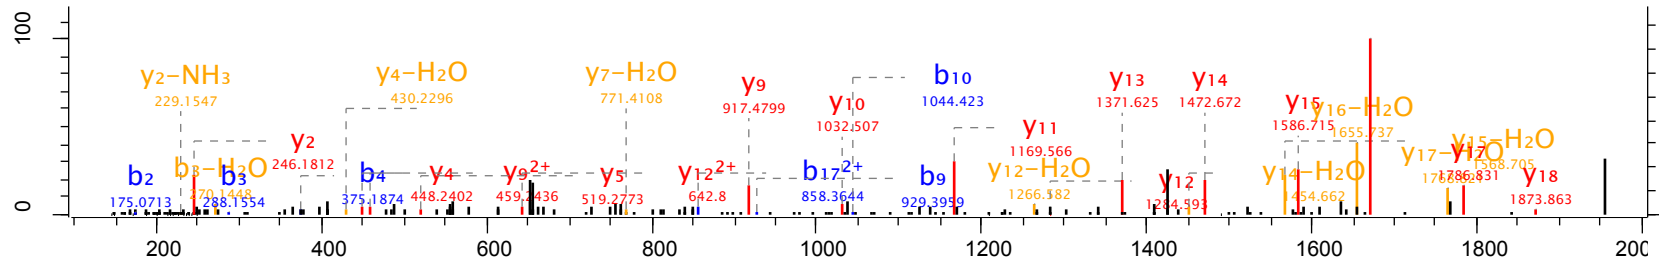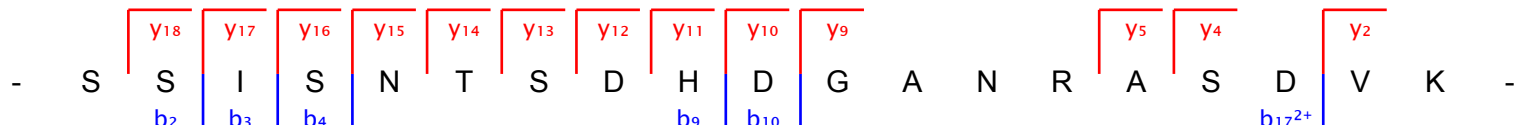

Raw file

Scan

Method

Score

m/z

Gene names

20150228\_yeast1\_Top\_opt\_B1\_01\_1614

4257

TOF; CID

62.56

471.74

PFA4

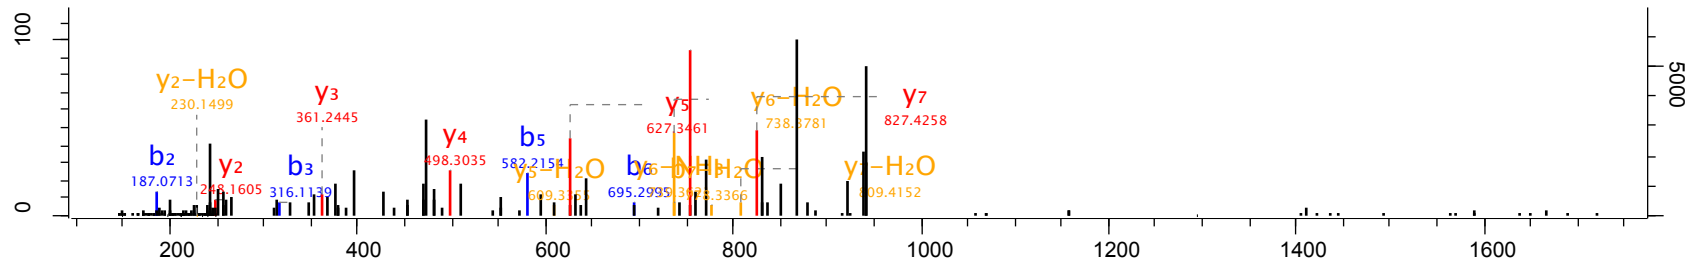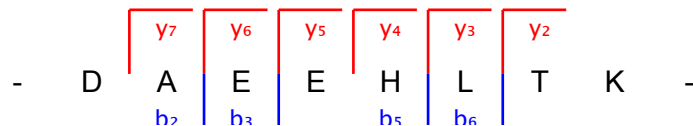

| Raw file                           | Scan | Method   | Score | m/z    | Gene names |
|------------------------------------|------|----------|-------|--------|------------|
| 20150228_yeast1_Top_opt_B1_01_1614 | 4507 | TOF; CID | 60.65 | 423.71 | LEE1       |

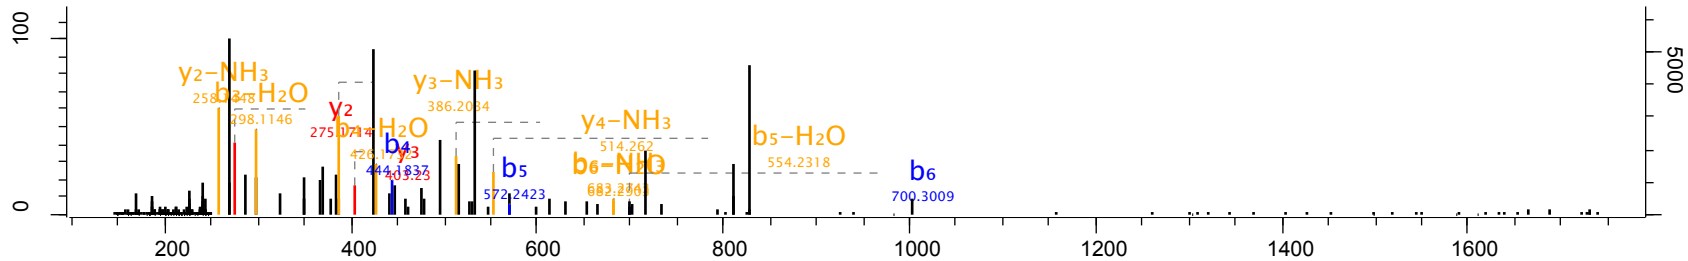

- N N S Q Q Q K -

h<sub>4</sub> h<sub>5</sub> h<sub>6</sub>

y<sub>3</sub> y<sub>2</sub>

Raw file

Scan

Method

Score

m/z

Gene names

20150228\_yeast1\_Top\_opt\_B1\_01\_1614

4879

TOF; CID

64.73

504.76

WWM1

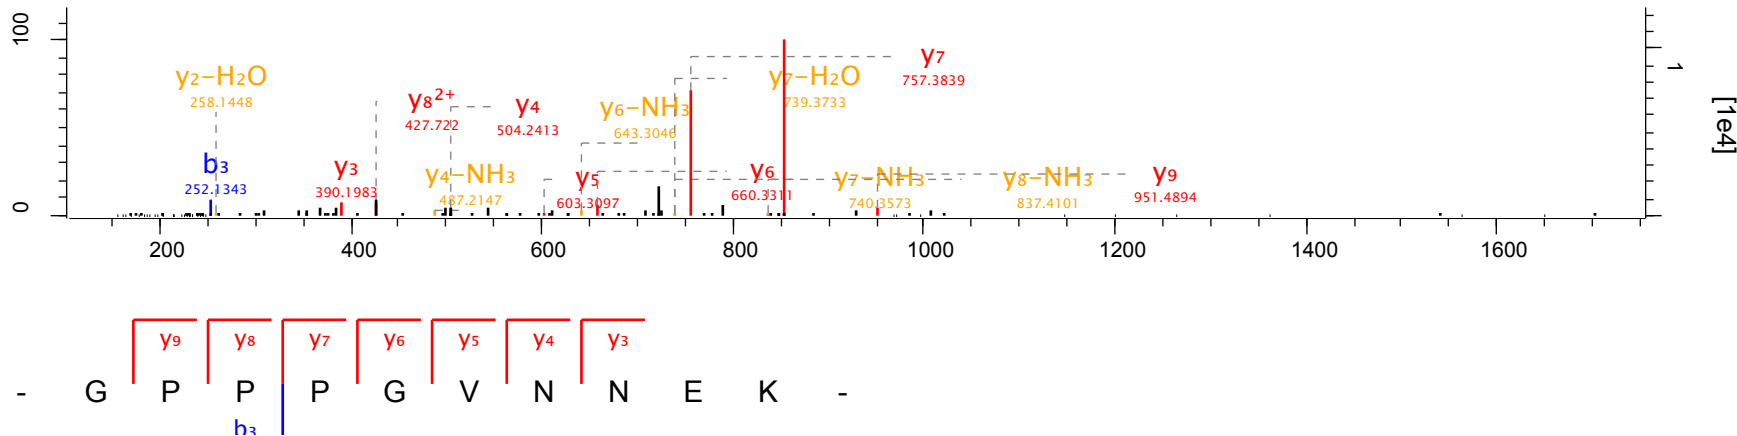

| Raw file                           | Scan | Method   | Score | m/z    | Gene names |
|------------------------------------|------|----------|-------|--------|------------|
| 20150228_yeast1_Top_opt_B1_01_1614 | 4907 | TOF; CID | 50.3  | 544.79 | YFH1       |

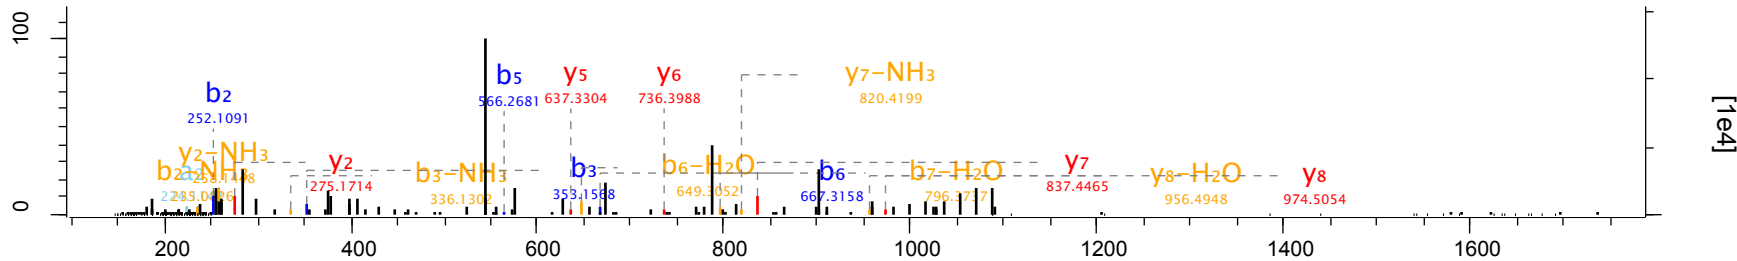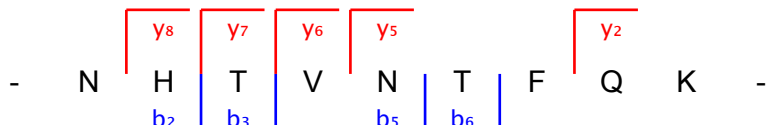

| Raw file                           | Scan | Method   | Score | m/z    | Gene names |
|------------------------------------|------|----------|-------|--------|------------|
| 20150228_yeast1_Top_opt_B1_01_1614 | 4954 | TOF; CID | 87.32 | 425.19 | PKR1       |

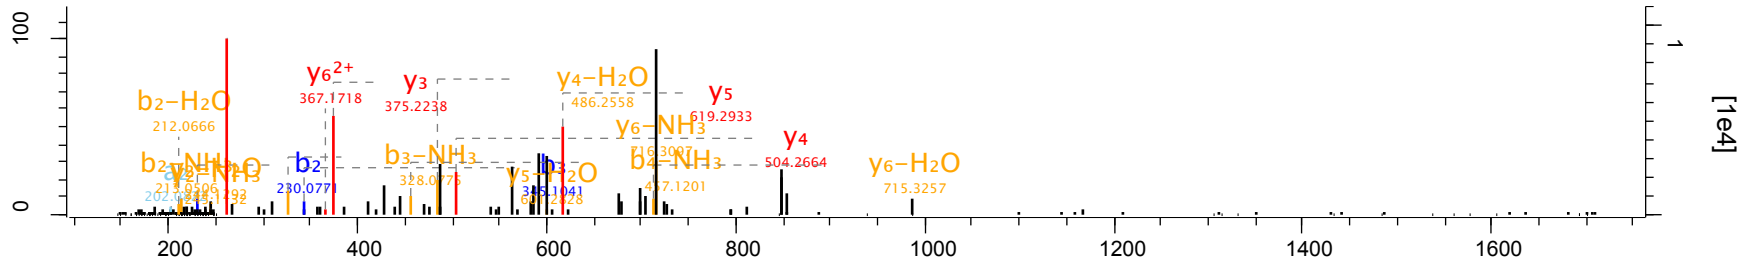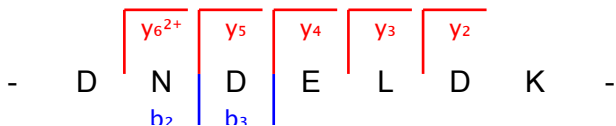

Raw file

20150228\_yeast1\_Top\_opt\_B1\_01\_1614

Scan

5287

Method

TOF; CID

Score

72.61

m/z

495.77

Gene names

GPB1

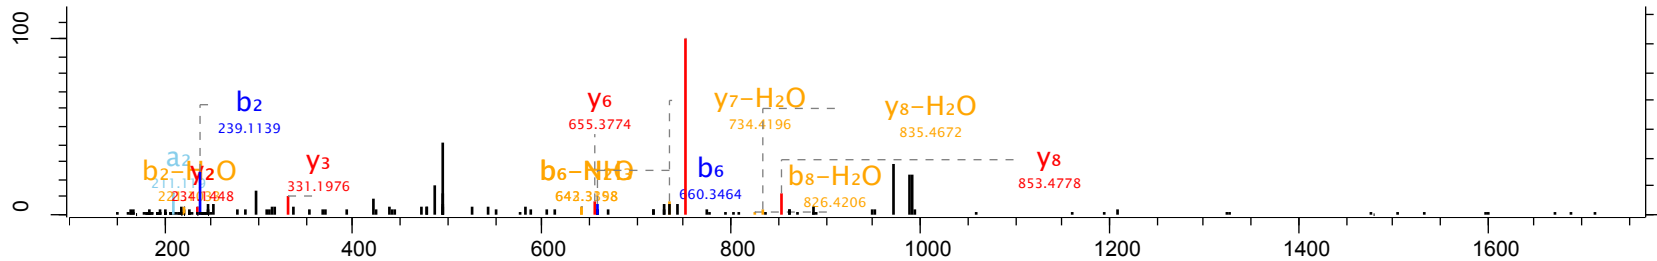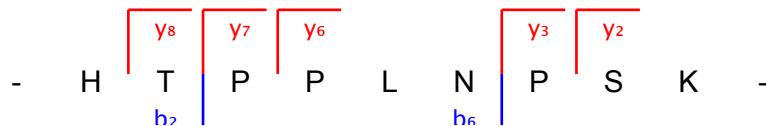

| Raw file                           | Scan | Method   | Score  | m/z    | Gene names |
|------------------------------------|------|----------|--------|--------|------------|
| 20150228_yeast1_Top_opt_B1_01_1614 | 5350 | TOF; CID | 133.13 | 494.28 | STF1       |

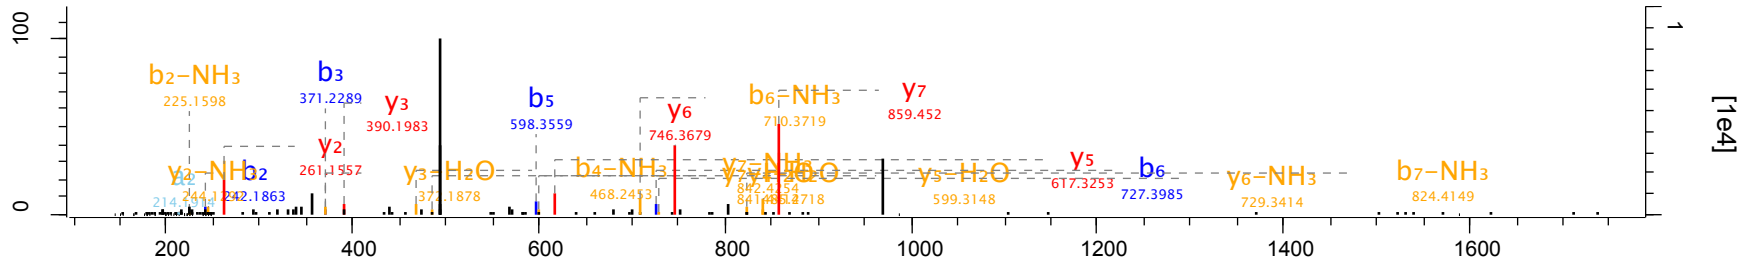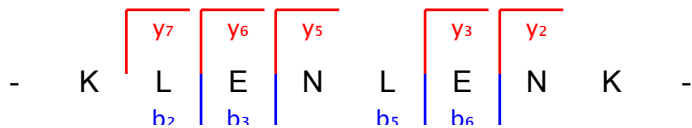



Raw file

20150228\_yeast1\_Top\_opt\_B1\_01\_1614

Scan

6200

Method

TOF; CID

Score

85.55

m/z

660.28

Gene names

QCR9

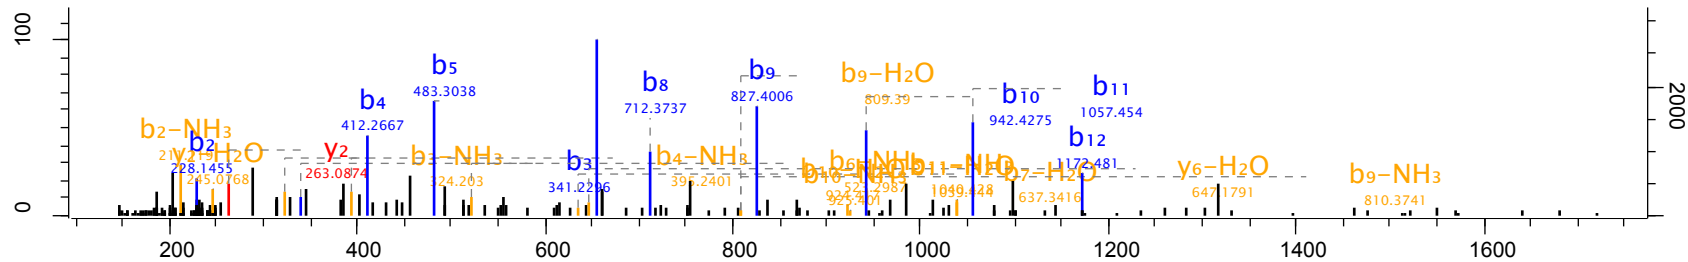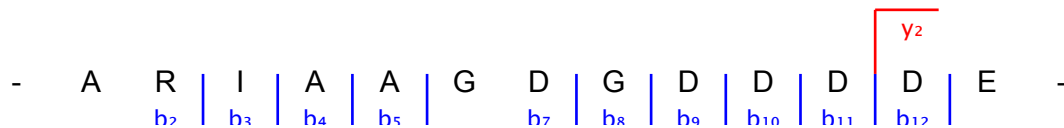

Raw file

Scan

Method

Score

m/z

Gene names

20150228\_yeast1\_Top\_opt\_B1\_01\_1614

6239

TOF; CID

62.72

411.22

MTC5

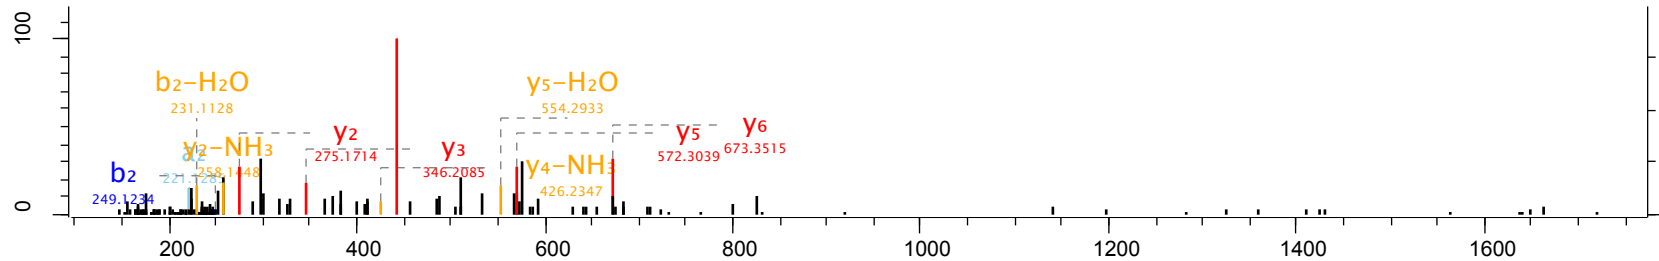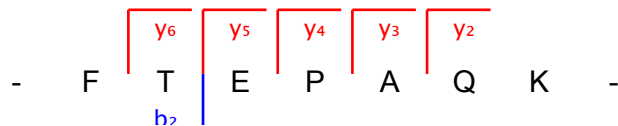

Raw file

Scan

Method

Score

m/z

Gene names

20150228\_yeast1\_Top\_opt\_B1\_01\_1614

6651

TOF; CID

136.7

623.31

GPR1

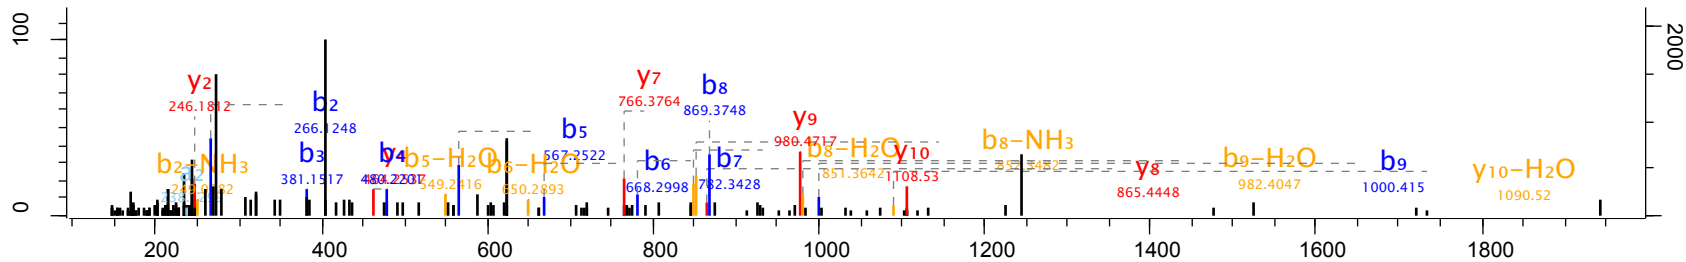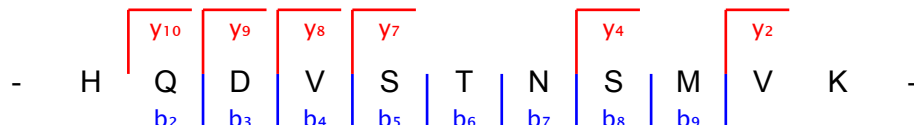

Raw file

Scan

Method

Score

m/z

Gene names

20150228\_yeast1\_Top\_opt\_B1\_01\_1614

7678

TOF; CID

43.42

602.79

SCC4

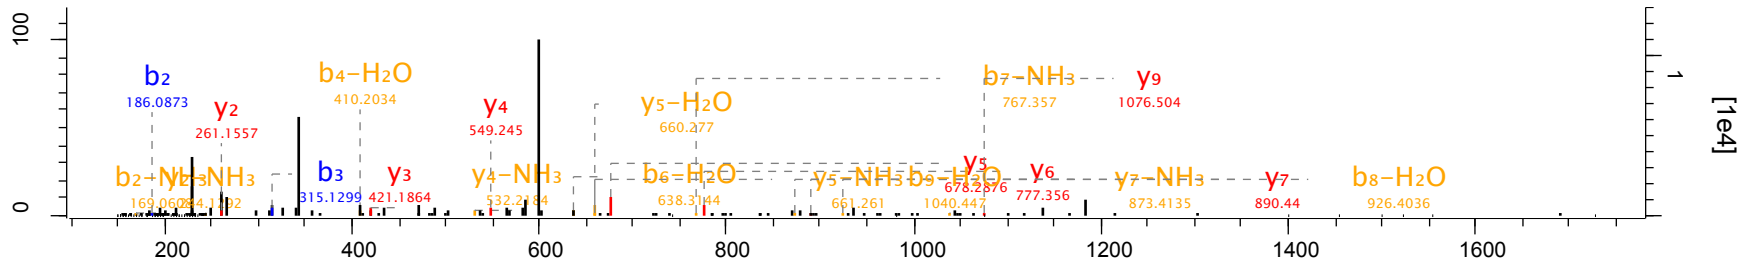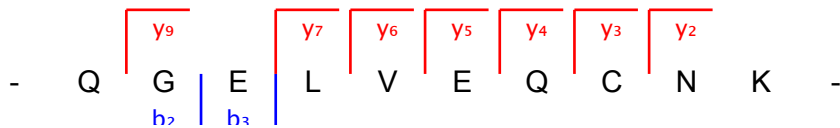

Raw file

20150228\_yeast1\_Top\_opt\_B1\_01\_1614

Scan

10125

Method

TOF; CID

Score

46.49

m/z

923.9

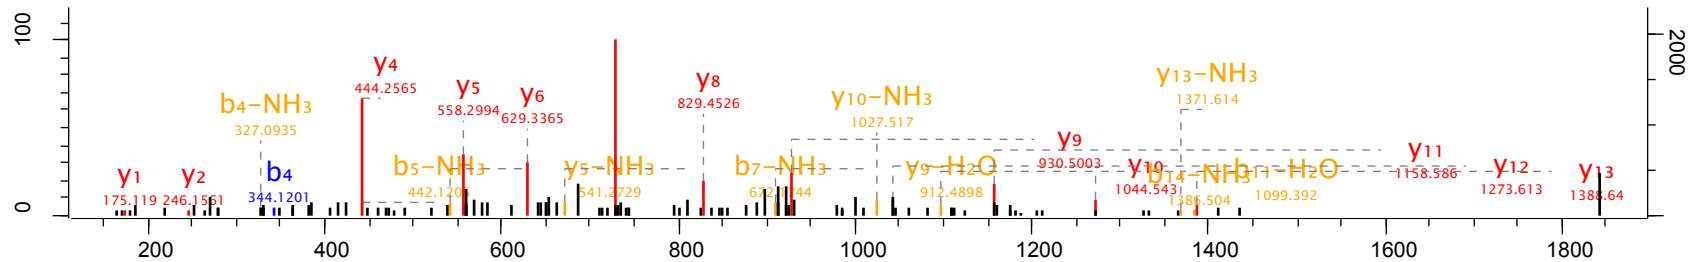

- G D G N D D D N N T V T A N P T A R -

h4

y13 y12 y11 y10 y9 y8 y7 y6 y5 y4 y2 y1

| Raw file                           | Scan  | Method   | Score | m/z   | Gene names |
|------------------------------------|-------|----------|-------|-------|------------|
| 20150228_yeast1_Top_opt_B1_01_1614 | 10426 | TOF; CID | 91.96 | 651.3 | FUN26      |

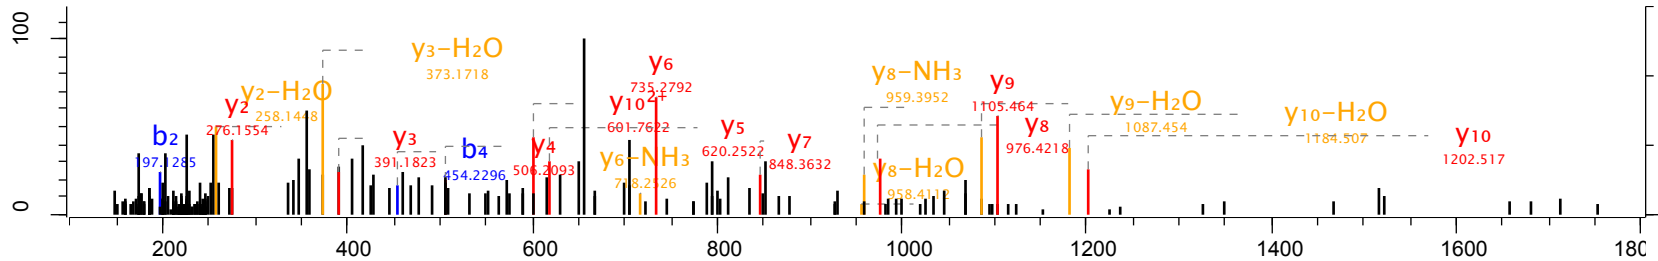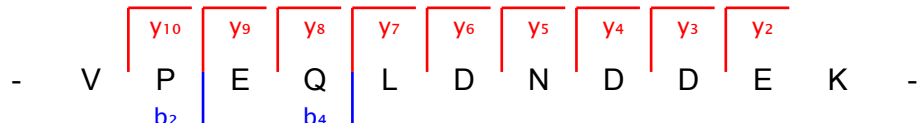

| Raw file                           | Scan  | Method   | Score | m/z    | Gene names |
|------------------------------------|-------|----------|-------|--------|------------|
| 20150228_yeast1_Top_opt_B1_01_1614 | 10466 | TOF; CID | 64.8  | 501.21 | INM2       |

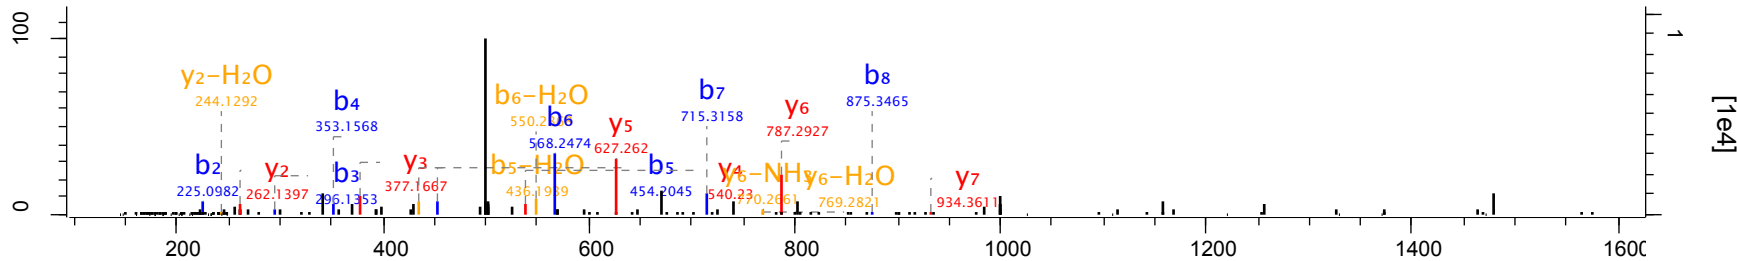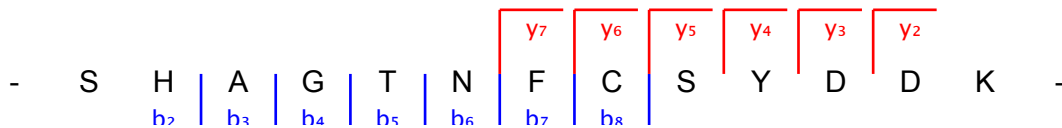

| Raw file                           | Scan  | Method   | Score | m/z    | Gene names |
|------------------------------------|-------|----------|-------|--------|------------|
| 20150228_yeast1_Top_opt_B1_01_1614 | 11727 | TOF; CID | 48.11 | 641.32 | UBP9       |

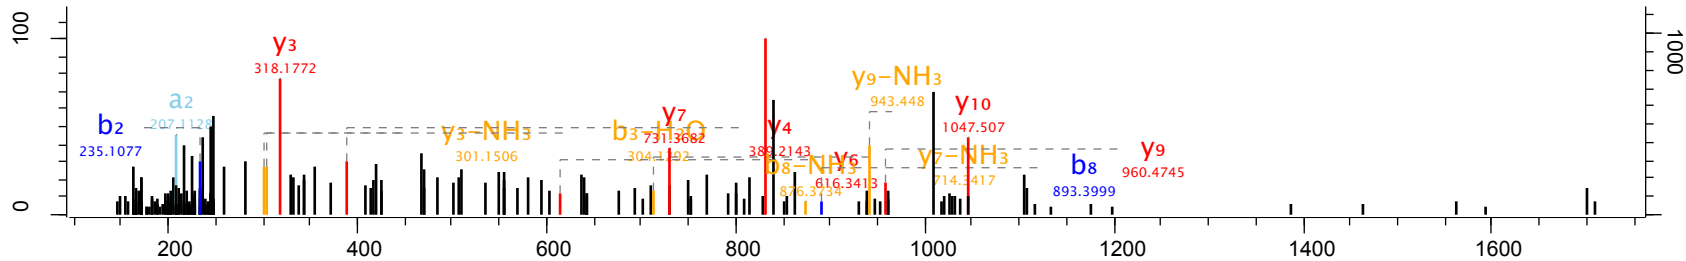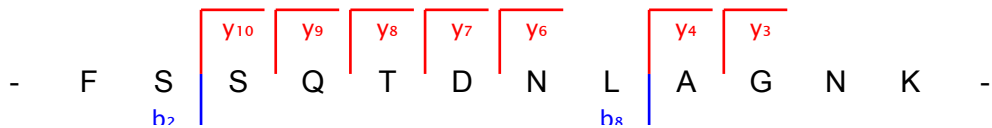



| Raw file                           | Scan  | Method   | Score | m/z    | Gene names |
|------------------------------------|-------|----------|-------|--------|------------|
| 20150228_yeast1_Top_opt_B1_01_1614 | 11765 | TOF; CID | 62.46 | 500.75 | RIM2       |

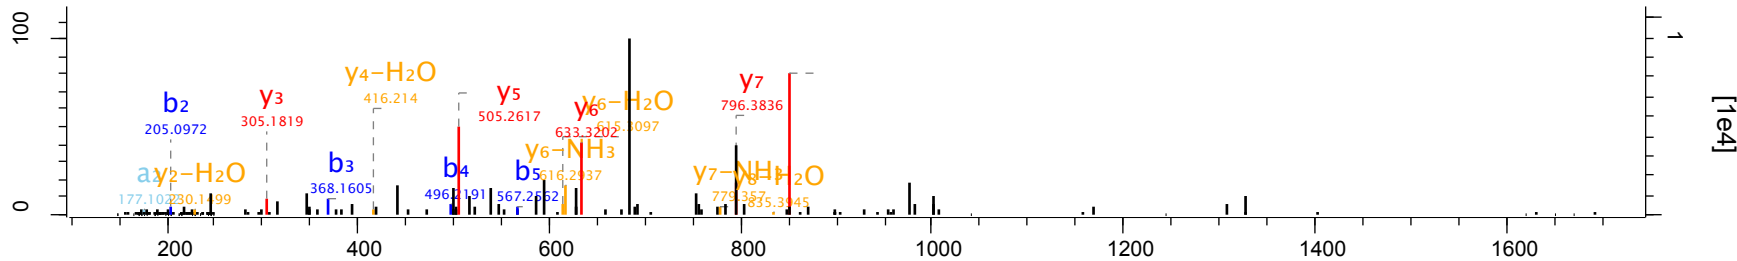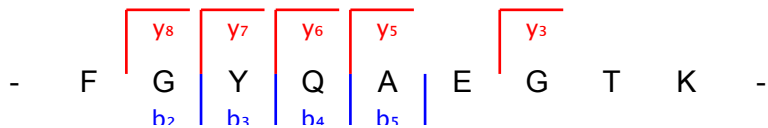

| Raw file                           | Scan  | Method   | Score | m/z    | Gene names |
|------------------------------------|-------|----------|-------|--------|------------|
| 20150228_yeast1_Top_opt_B1_01_1614 | 11861 | TOF; CID | 84.61 | 511.26 | RTC3       |

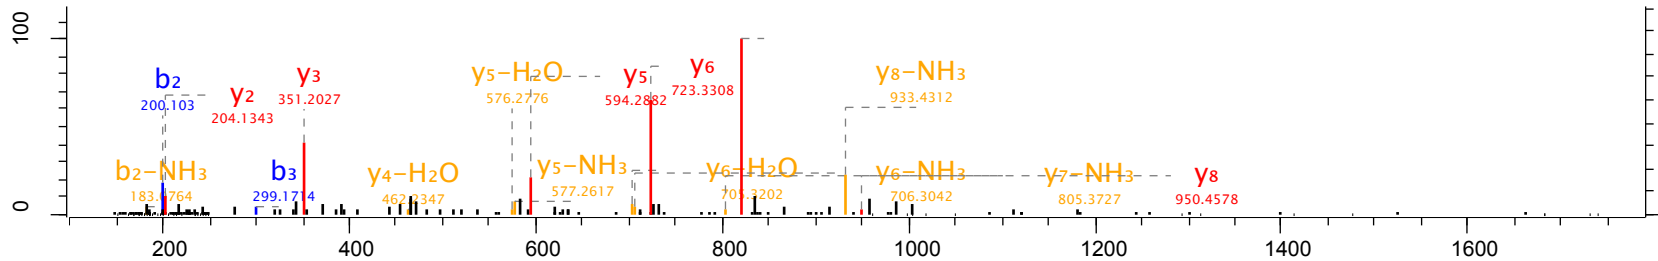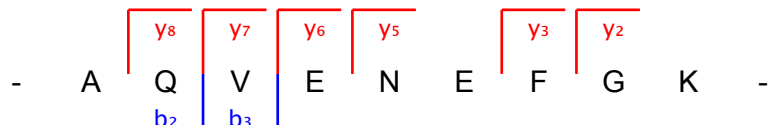

Raw file

Scan

Method

Score

m/z

Gene names

20150228\_yeast1\_Top\_opt\_B1\_01\_1614

12088

TOF; CID

50.18

591.63

CLB2

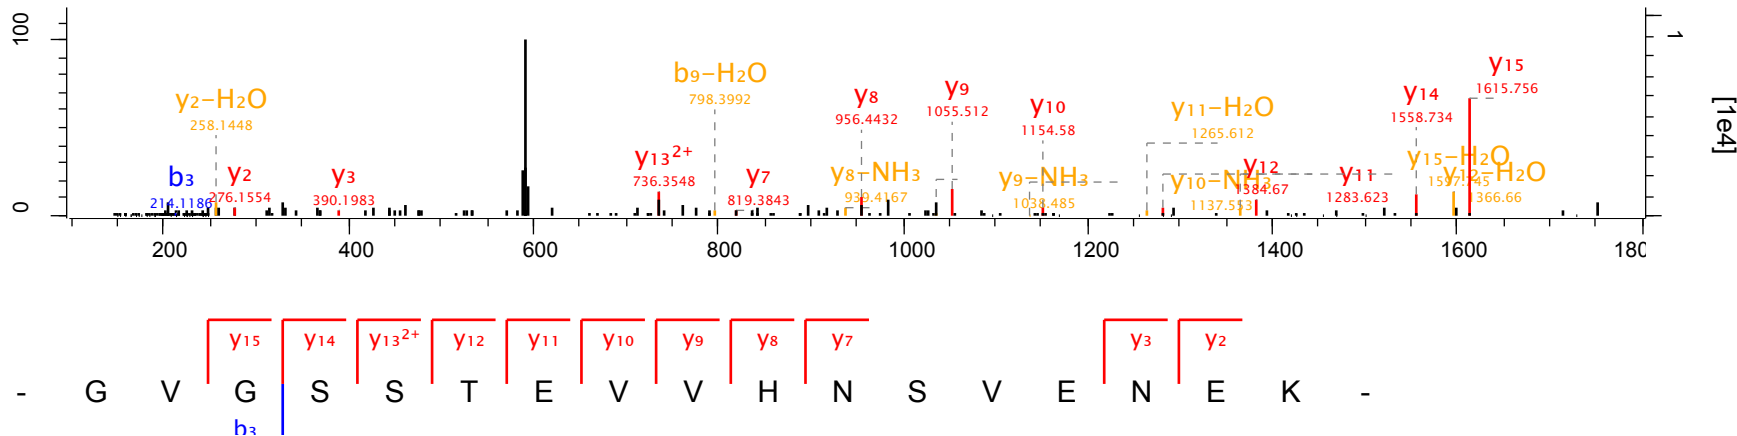

Raw file

Scan

Method

Score

m/z

Gene names

20150228\_yeast1\_Top\_opt\_B1\_01\_1614

12839

TOF; CID

69.03

635.32

MIH1

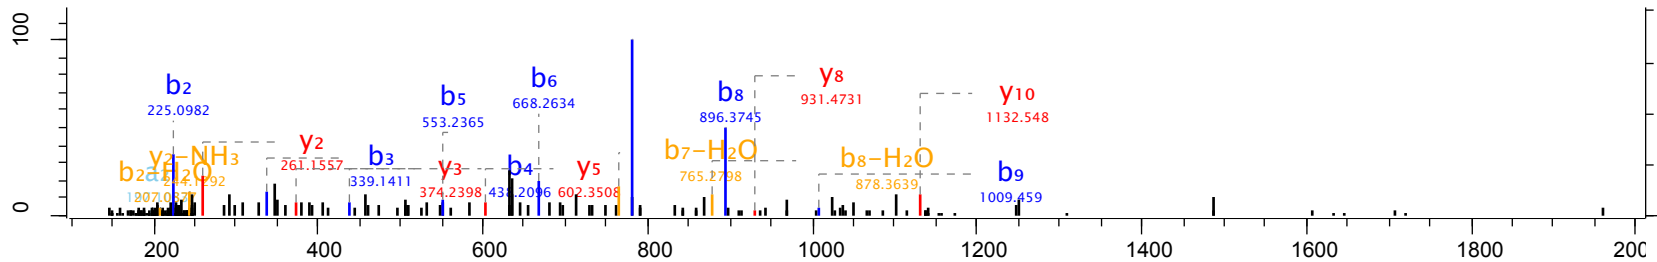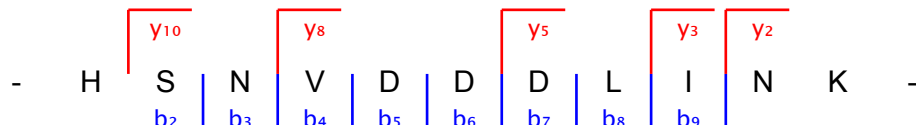

| Raw file                           | Scan  | Method   | Score  | m/z   | Gene names |
|------------------------------------|-------|----------|--------|-------|------------|
| 20150228_yeast1_Top_opt_B1_01_1614 | 13071 | TOF; CID | 109.44 | 514.6 | PAM17      |

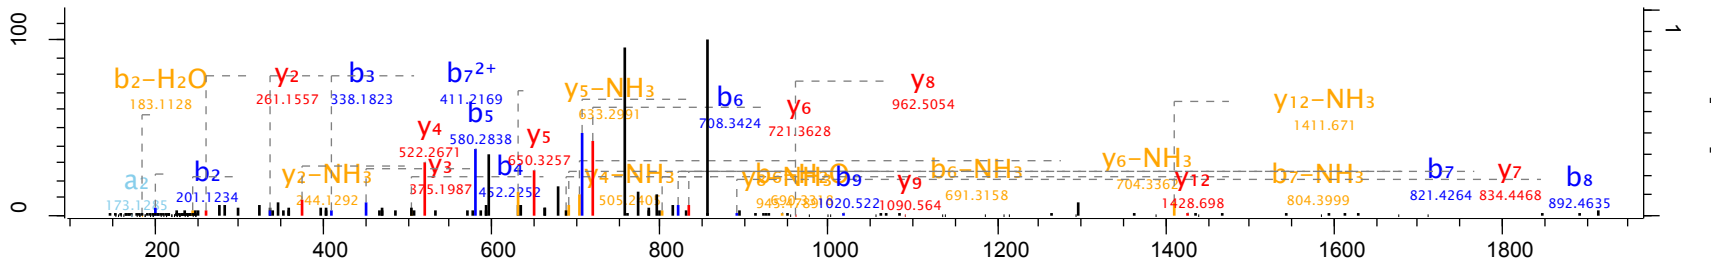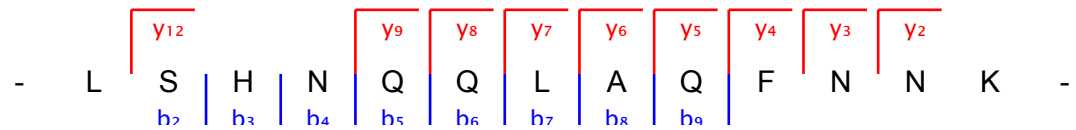

Raw file

Scan

Method

Score

m/z

Gene names

20150228\_yeast1\_Top\_opt\_B1\_01\_1614

13624

TOF; CID

103.43

581.83

RME1

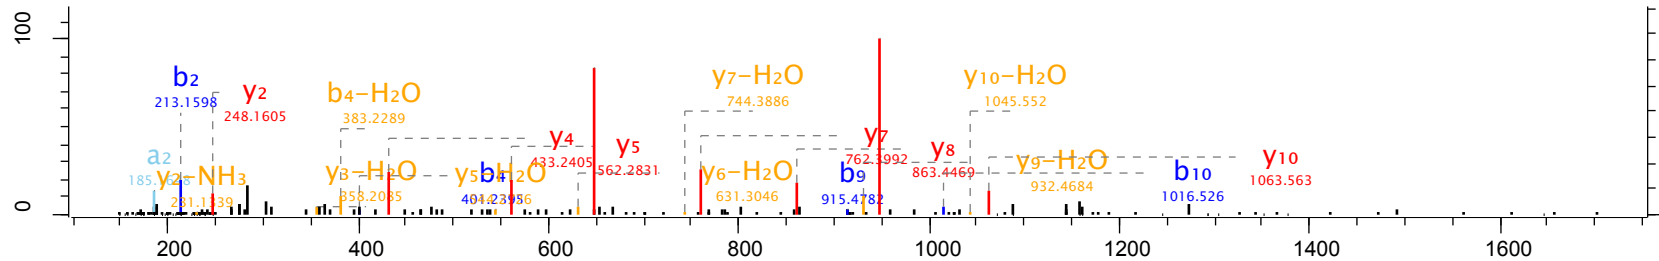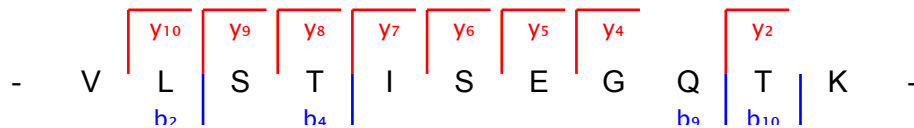

| Raw file                           | Scan  | Method   | Score | m/z    | Gene names |
|------------------------------------|-------|----------|-------|--------|------------|
| 20150228_yeast1_Top_opt_B1_01_1614 | 14117 | TOF; CID | 67.51 | 470.76 | NSE3       |

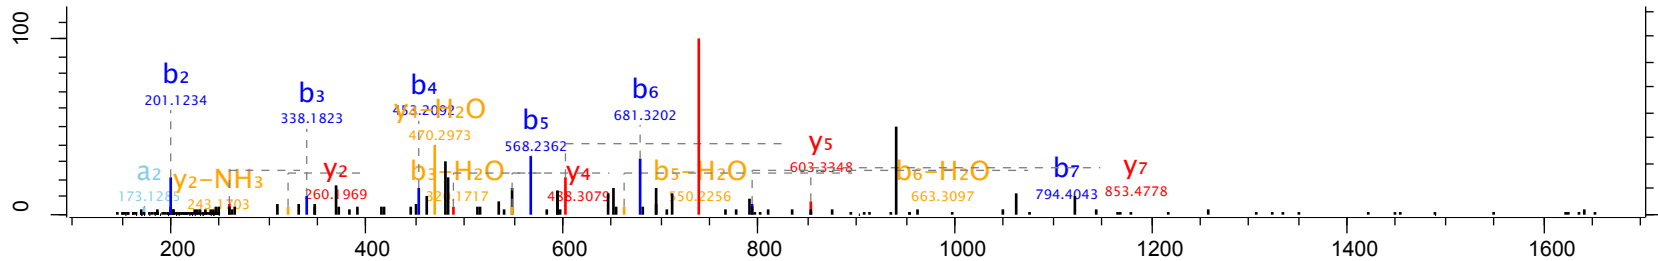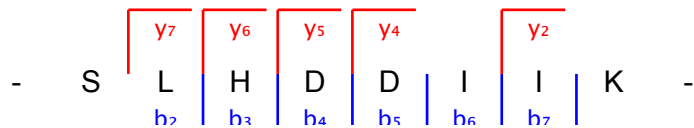

| Raw file                           | Scan  | Method   | Score | m/z    | Gene names |
|------------------------------------|-------|----------|-------|--------|------------|
| 20150228_yeast1_Top_opt_B1_01_1614 | 14764 | TOF; CID | 60.44 | 530.26 | PTC4       |

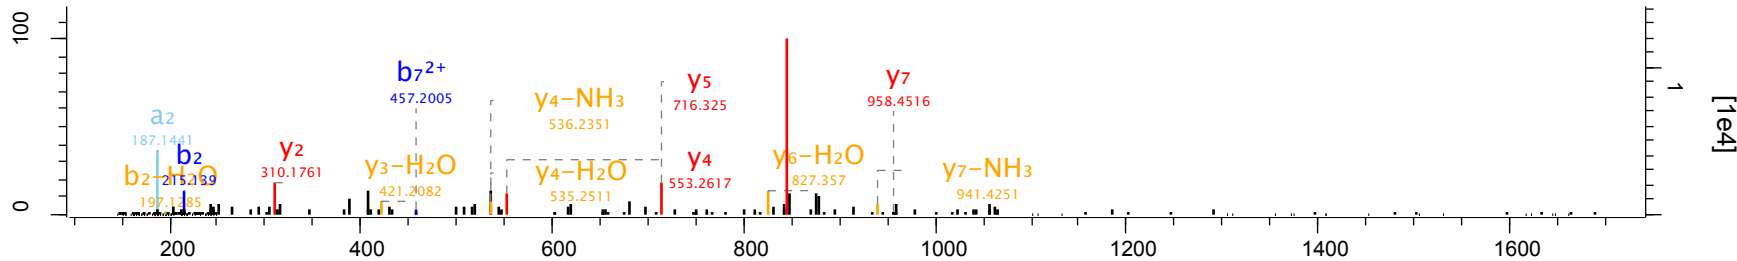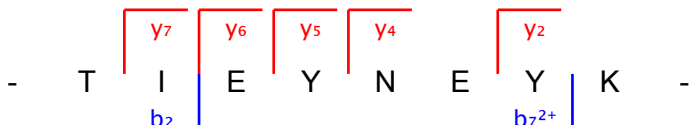



Raw file

Scan

Method

Score

m/z

20150228\_yeast1\_Top\_opt\_B1\_01\_1614

14921

TOF; CID

60.16

703.33

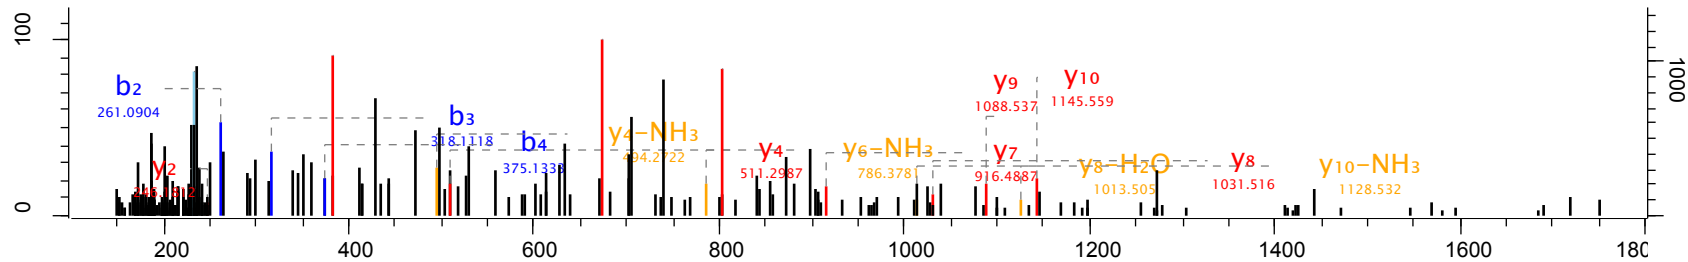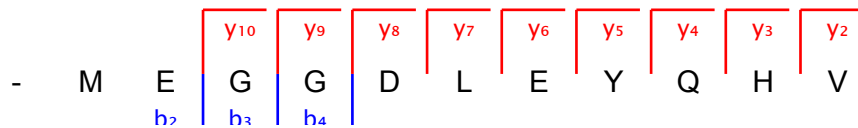

Raw file

20150228\_yeast1\_Top\_opt\_B1\_01\_1614

Scan

14976

Method

TOF; CID

Score

46.95

m/z

624.26

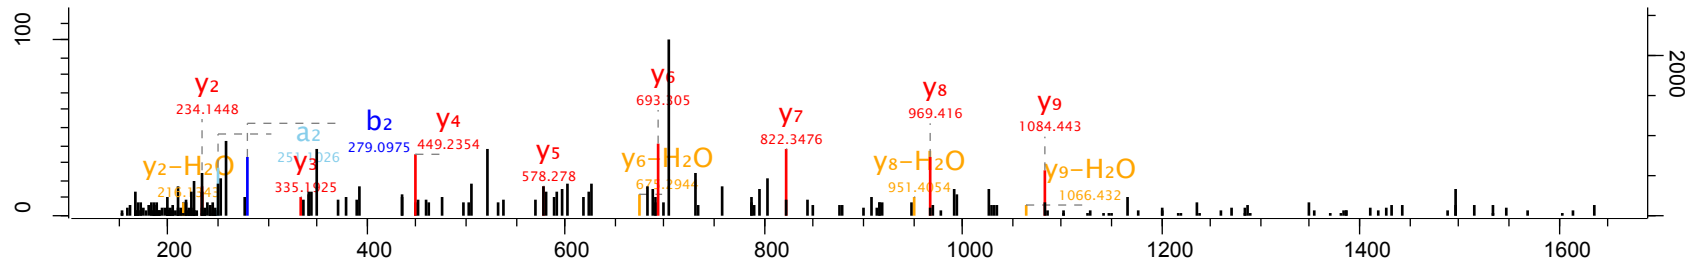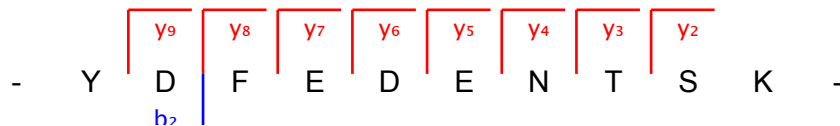

Raw file

20150228\_yeast1\_Top\_opt\_B1\_01\_1614

Scan

15019

Method

TOF; CID

Score

40.5

m/z

526.28

Gene names

MEC1

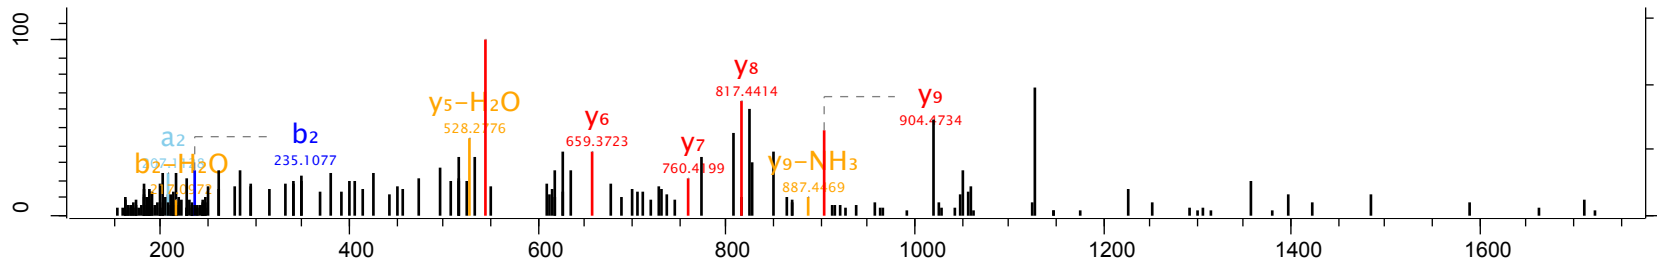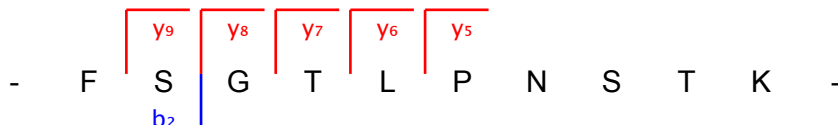



| Raw file                           | Scan  | Method   | Score | m/z    | Gene names |
|------------------------------------|-------|----------|-------|--------|------------|
| 20150228_yeast1_Top_opt_B1_01_1614 | 16073 | TOF; CID | 59.35 | 461.74 | TAH1       |

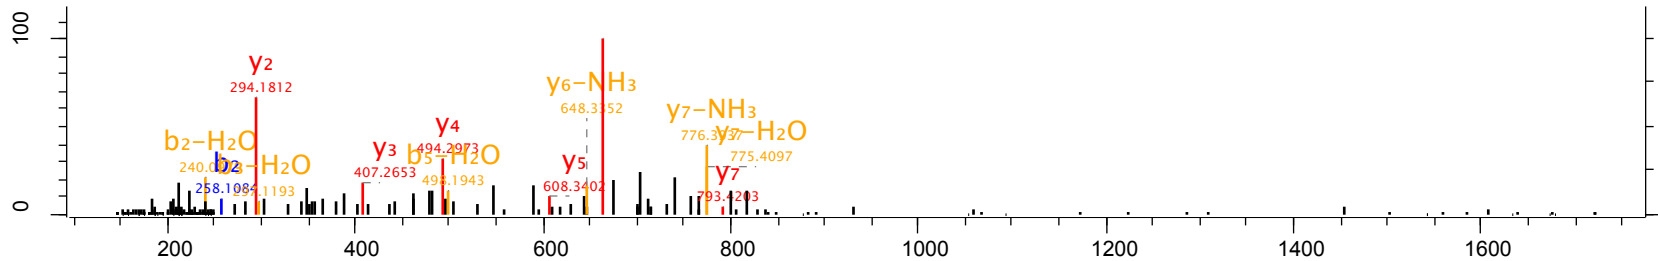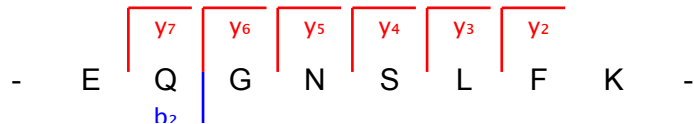

Raw file

Scan

Method

Score

m/z

Gene names

20150228\_yeast1\_Top\_opt\_B1\_01\_1614

16300

TOF; CID

85.47

808.39

AIM43

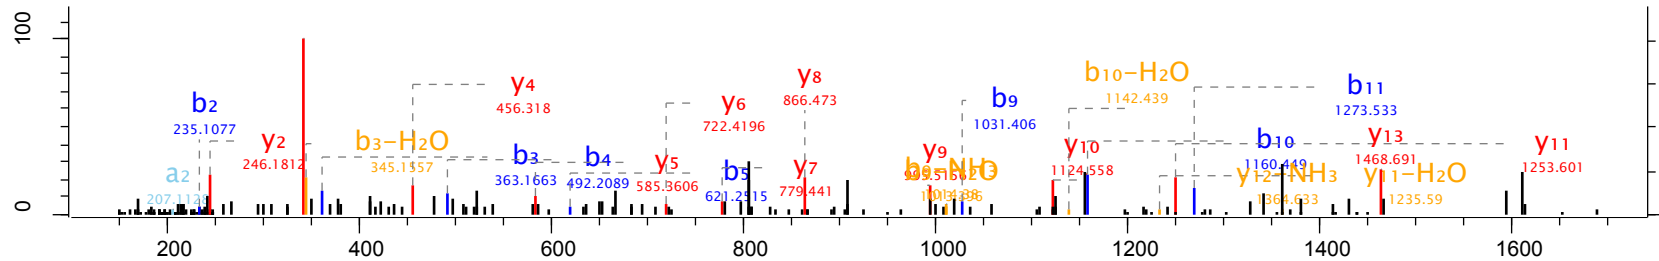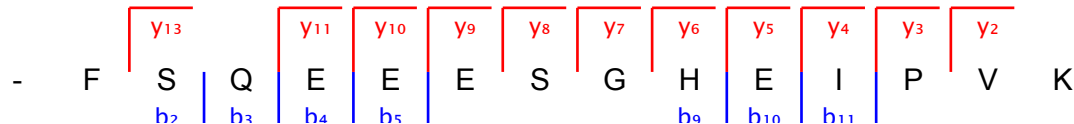

Raw file

20150228\_yeast1\_Top\_opt\_B1\_01\_1614

Scan

16613

Method

TOF; CID

Score

111.52

m/z

652.35

Gene names

SEN34

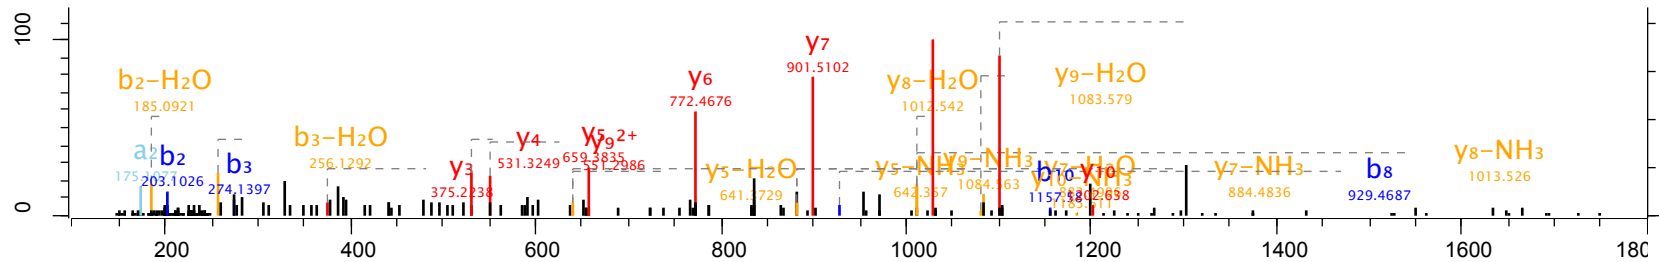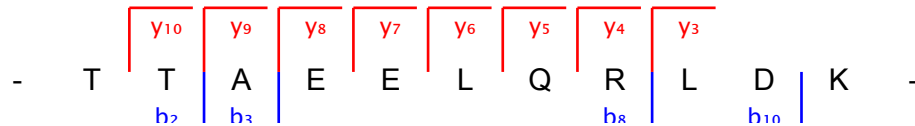

Raw file

20150228\_yeast1\_Top\_opt\_B1\_01\_1614

Scan

16652

Method

TOF; CID

Score

155.56

m/z

857.41

Gene names

SHR3

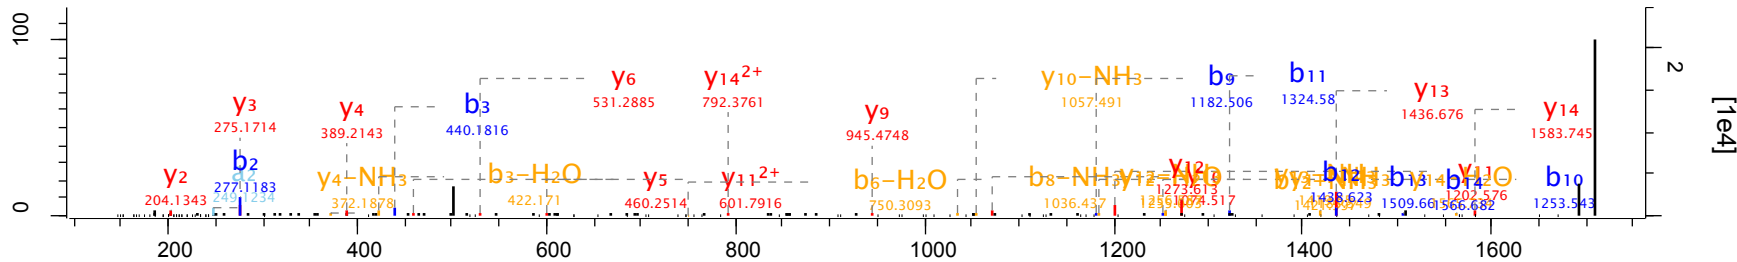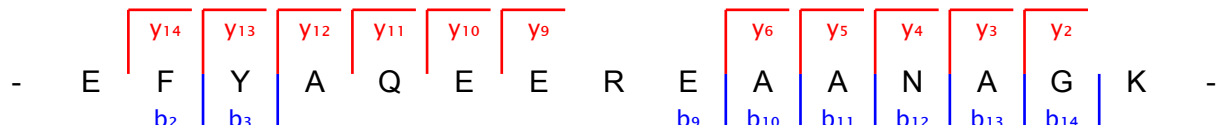



| Raw file                           | Scan  | Method   | Score | m/z    | Gene names |
|------------------------------------|-------|----------|-------|--------|------------|
| 20150228_yeast1_Top_opt_B1_01_1614 | 16743 | TOF; CID | 79.09 | 669.35 | MTR2       |

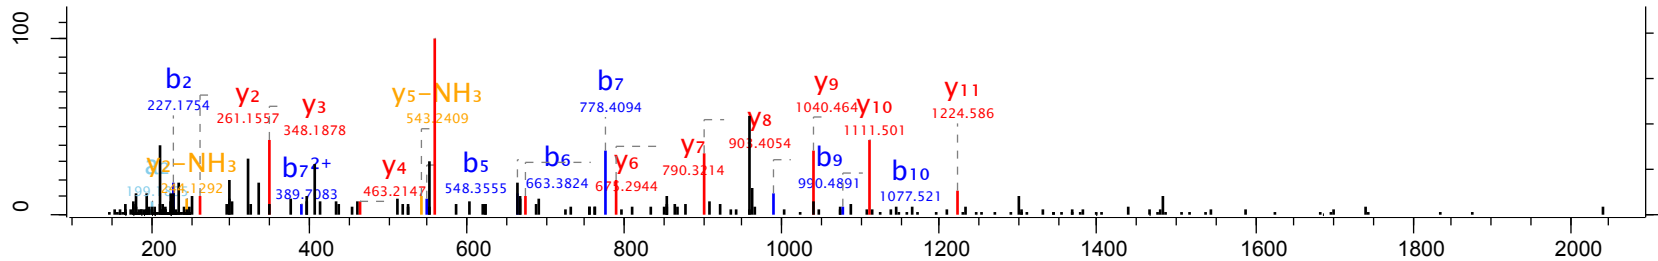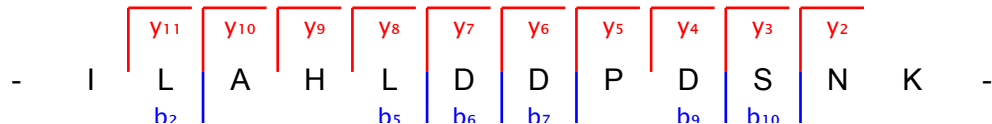

| Raw file                           | Scan  | Method   | Score | m/z    | Gene names |
|------------------------------------|-------|----------|-------|--------|------------|
| 20150228_yeast1_Top_opt_B1_01_1614 | 17087 | TOF; CID | 57.79 | 667.34 | ALK2       |

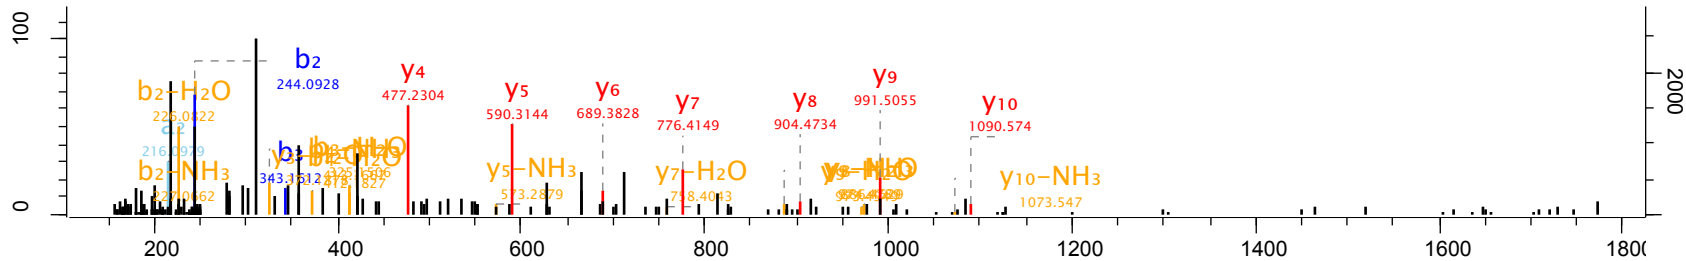

Protein sequence: - E N V S Q S V L S E N K -

Fragmentation sites (b and y ions) are indicated by brackets above the sequence:

- b<sub>2</sub>** (blue) and **b<sub>3</sub>** (blue) are shown below the N and V residues.
- y<sub>4</sub>** through **y<sub>10</sub>** (red) are shown above the V, S, Q, S, V, L, and S residues.

| Raw file                           | Scan  | Method   | Score | m/z    | Gene names |
|------------------------------------|-------|----------|-------|--------|------------|
| 20150228_yeast1_Top_opt_B1_01_1614 | 17749 | TOF; CID | 77.74 | 531.28 | ATE1       |

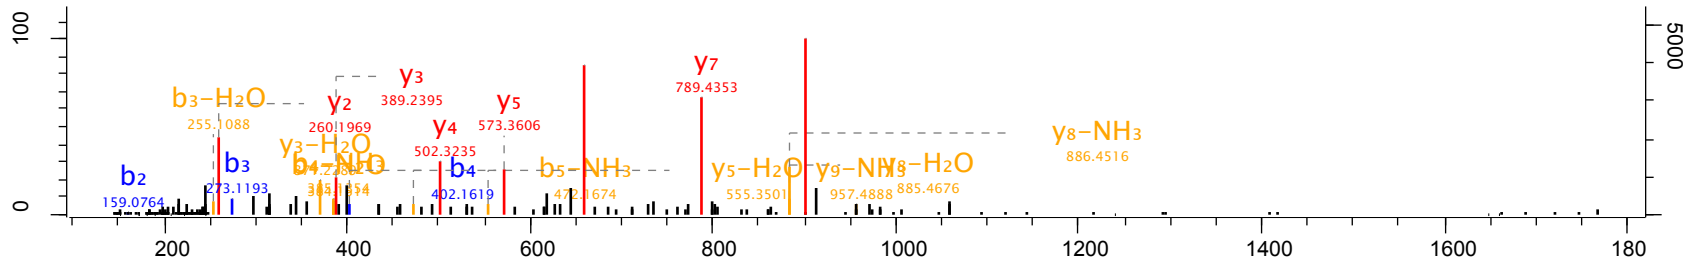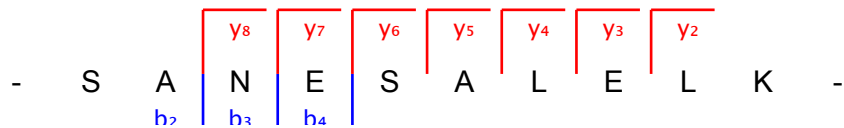

Raw file

Scan

Method

Score

m/z

Gene names

20150228\_yeast1\_Top\_opt\_B1\_01\_1614

17895

TOF; CID

71.98

659.83

SIZ1

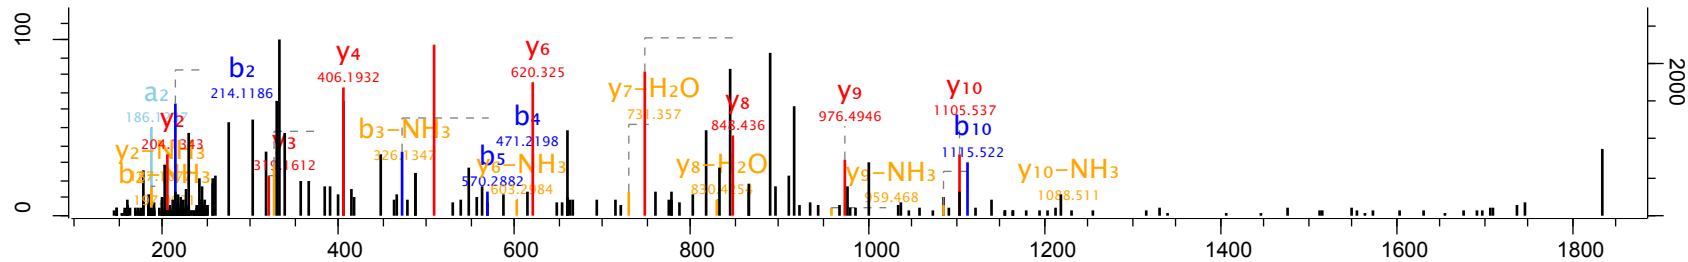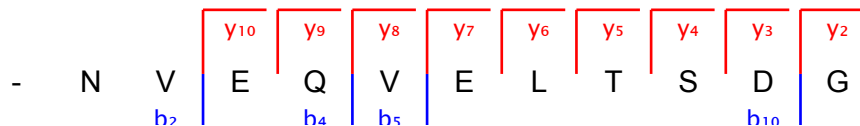

Raw file

Scan

Method

Score

m/z

Gene names

20150228\_yeast1\_Top\_opt\_B1\_01\_1614

18674

TOF; CID

50.29

1095.5

SPT3

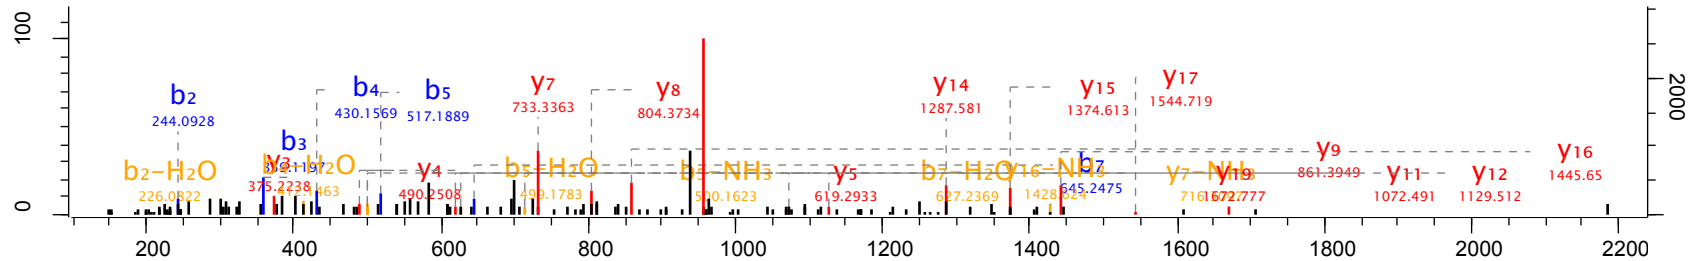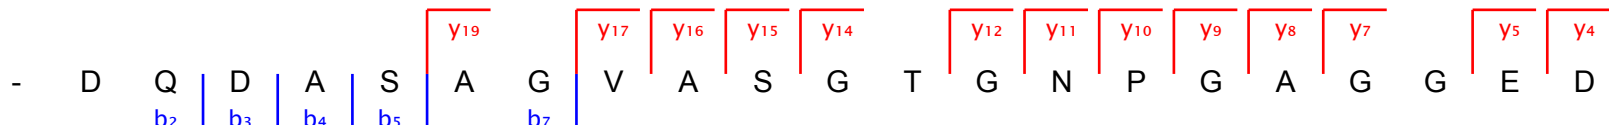

Raw file

Scan

Method

Score

m/z

Gene names

20150228\_yeast1\_Top\_opt\_B1\_01\_1614

18744

TOF; CID

111.34

808.42

FLC3

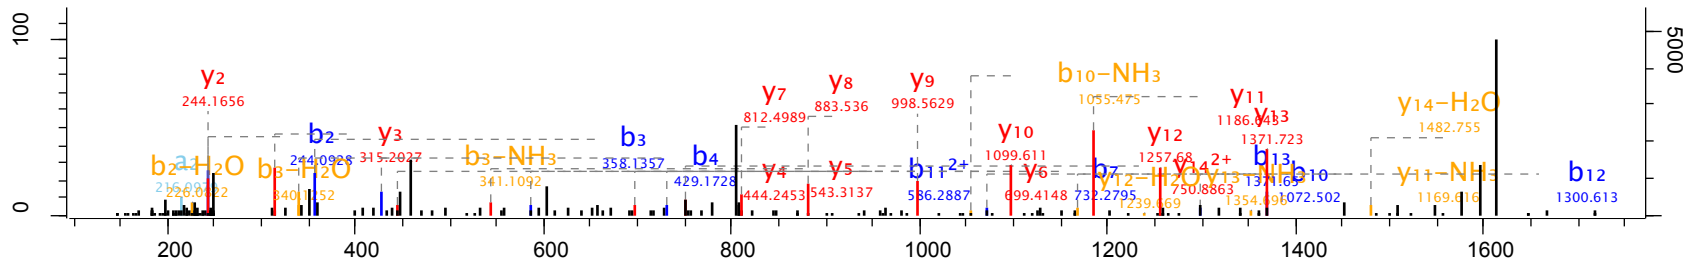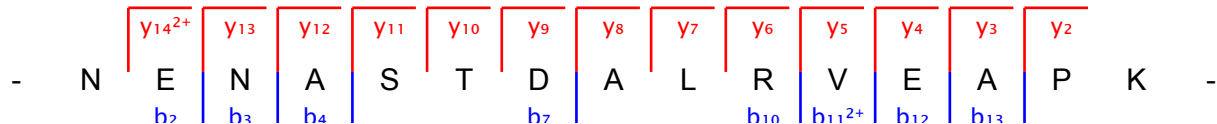

| Raw file                           | Scan  | Method   | Score | m/z    | Gene names |
|------------------------------------|-------|----------|-------|--------|------------|
| 20150228_yeast1_Top_opt_B1_01_1614 | 18782 | TOF; CID | 52.58 | 755.34 | SEC59      |

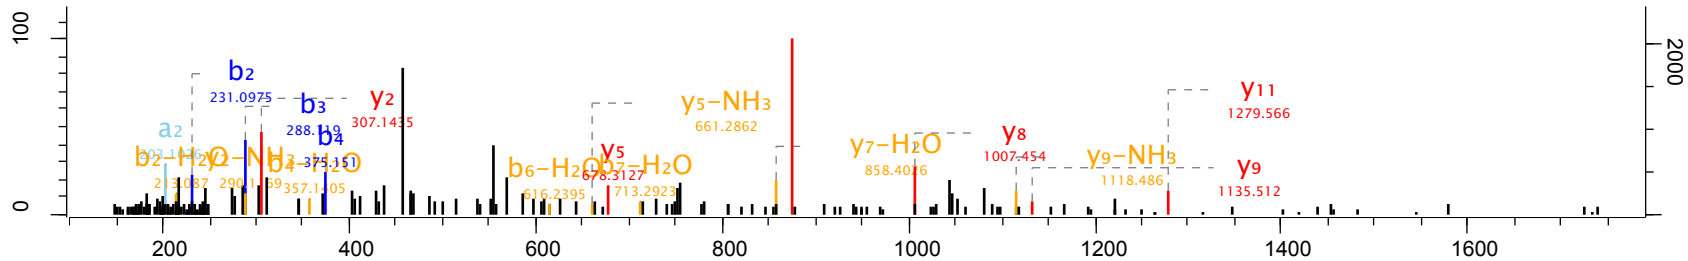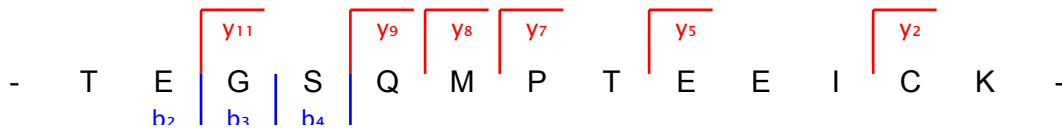

| Raw file                           | Scan  | Method   | Score | m/z    | Gene names |
|------------------------------------|-------|----------|-------|--------|------------|
| 20150228_yeast1_Top_opt_B1_01_1614 | 19171 | TOF; CID | 73.04 | 402.74 | YOL107W    |

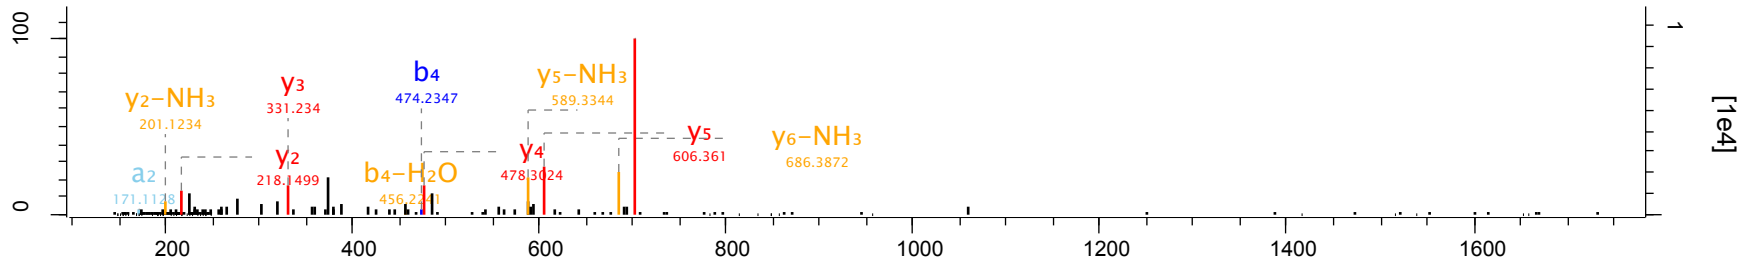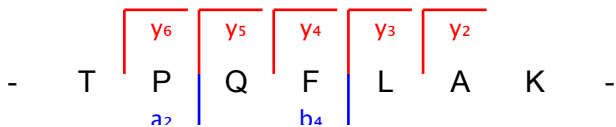



Raw file

Scan

Method

Score

m/z

Gene names

20150228\_yeast1\_Top\_opt\_B1\_01\_1614

19233

TOF; CID

96.14

833.9

RAD10

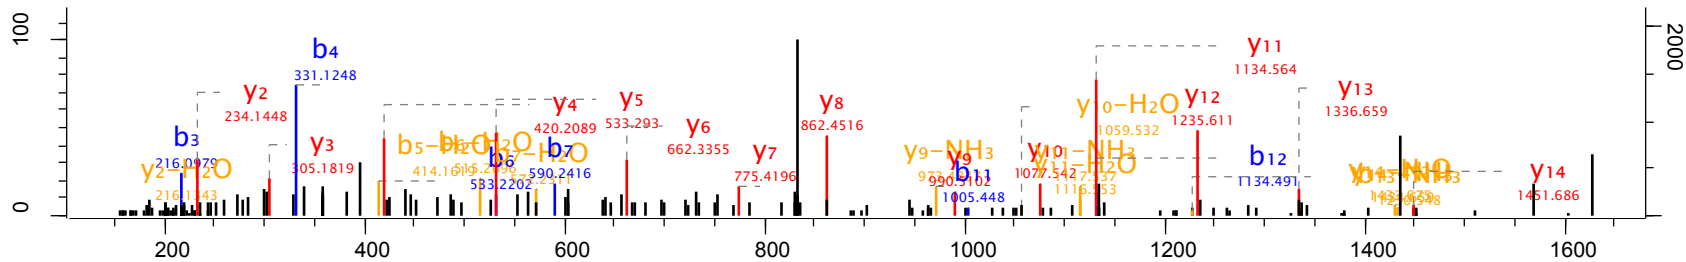

- S G A D T T G S Q S L E I D A S K -

b<sub>3</sub> y<sub>14</sub> y<sub>13</sub> y<sub>12</sub> y<sub>11</sub> y<sub>10</sub> y<sub>9</sub> y<sub>8</sub> y<sub>7</sub> y<sub>6</sub> y<sub>5</sub> y<sub>4</sub> y<sub>3</sub> y<sub>2</sub>  
b<sub>4</sub> b<sub>6</sub> b<sub>7</sub> b<sub>11</sub> b<sub>12</sub>

| Raw file                           | Scan  | Method   | Score | m/z   | Gene names |
|------------------------------------|-------|----------|-------|-------|------------|
| 20150228_yeast1_Top_opt_B1_01_1614 | 19474 | TOF; CID | 43.42 | 523.8 | FAU1       |

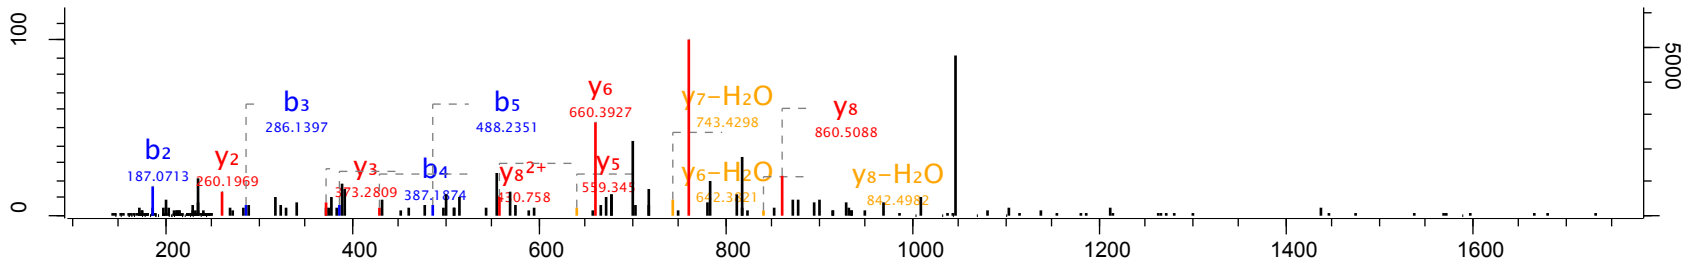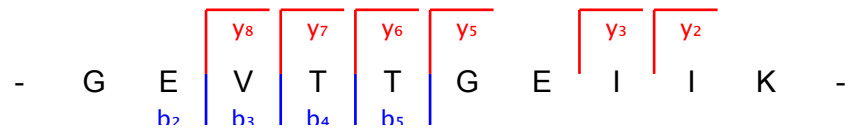

| Raw file                           | Scan  | Method   | Score | m/z    | Gene names |
|------------------------------------|-------|----------|-------|--------|------------|
| 20150228_yeast1_Top_opt_B1_01_1614 | 19480 | TOF; CID | 50.35 | 448.25 | OCA1       |

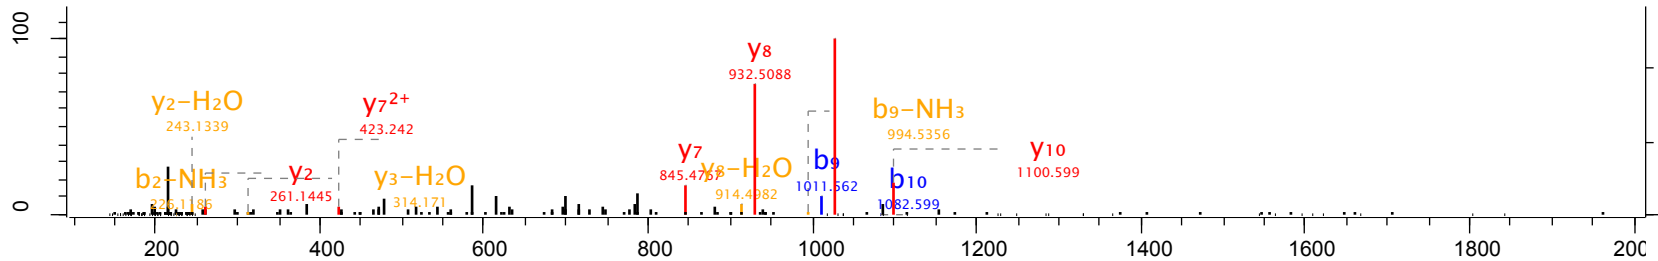

- N K A P S W L L T A L E -

┌ y<sub>10</sub> └ ┌ y<sub>9</sub> └ ┌ y<sub>8</sub> └ ┌ y<sub>7</sub> └

┌ b<sub>9</sub> └ ┌ b<sub>10</sub> └ ┌ y<sub>2</sub> └

Raw file

20150228\_yeast1\_Top\_opt\_B1\_01\_1614

Scan

19694

Method

TOF; CID

Score

57.79

m/z

481.27

Gene names

YSC83

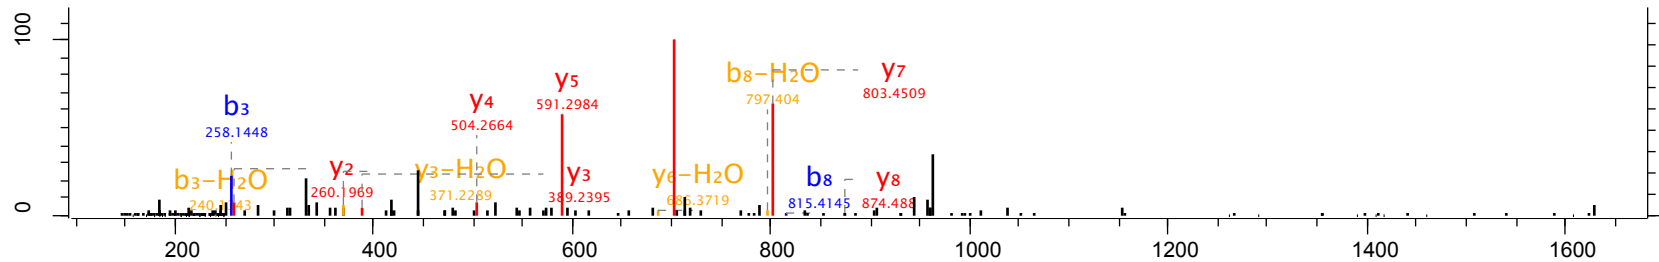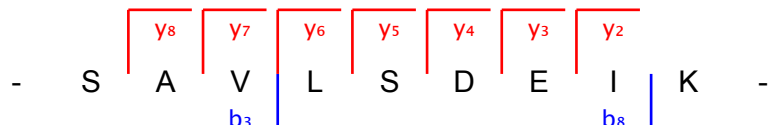

Raw file

20150228\_yeast1\_Top\_opt\_B1\_01\_1614

Scan

20585

Method

TOF; CID

Score

46.25

m/z

812.39

Gene names

MMT2

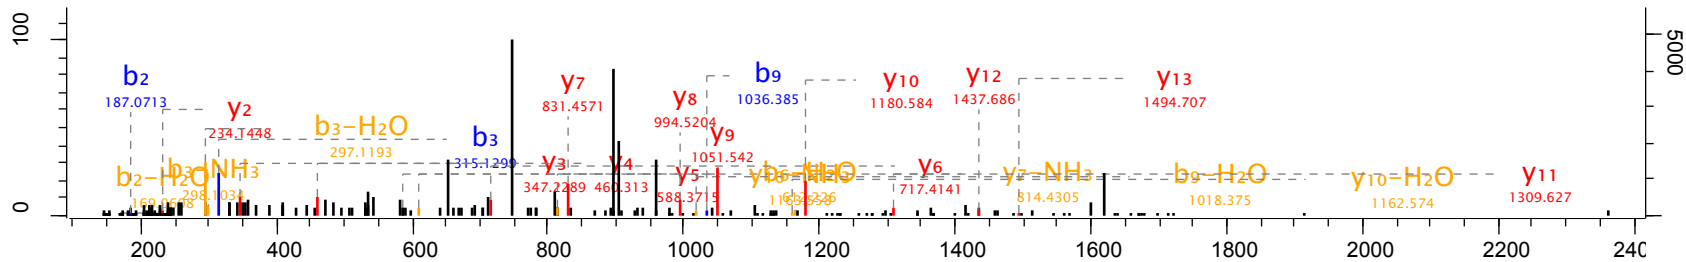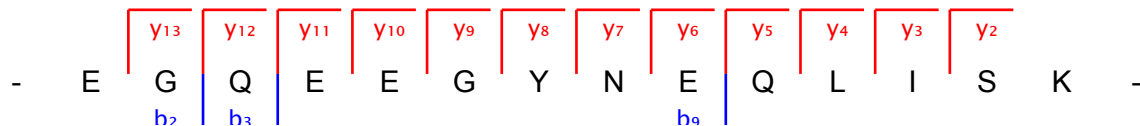

| Raw file                           | Scan  | Method   | Score | m/z   | Gene names |
|------------------------------------|-------|----------|-------|-------|------------|
| 20150228_yeast1_Top_opt_B1_01_1614 | 21142 | TOF; CID | 66.27 | 628.8 | MRPL31     |

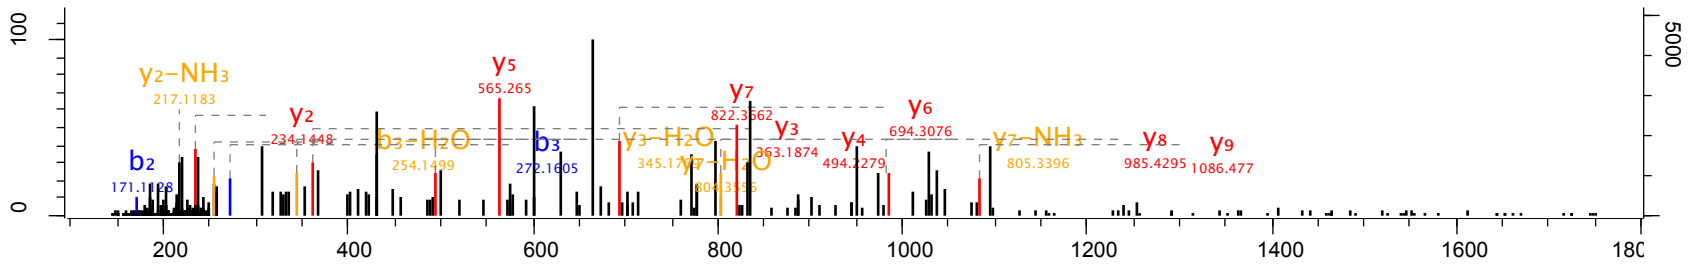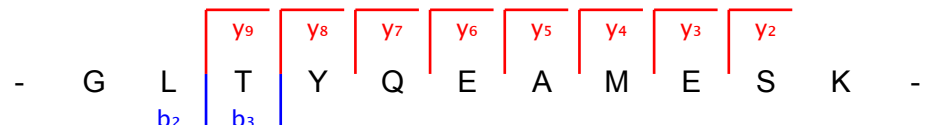

Raw file

Scan

Method

Score

m/z

Gene names

20150228\_yeast1\_Top\_opt\_B1\_01\_1614

21517

TOF; CID

83.69

704.86

RAD2

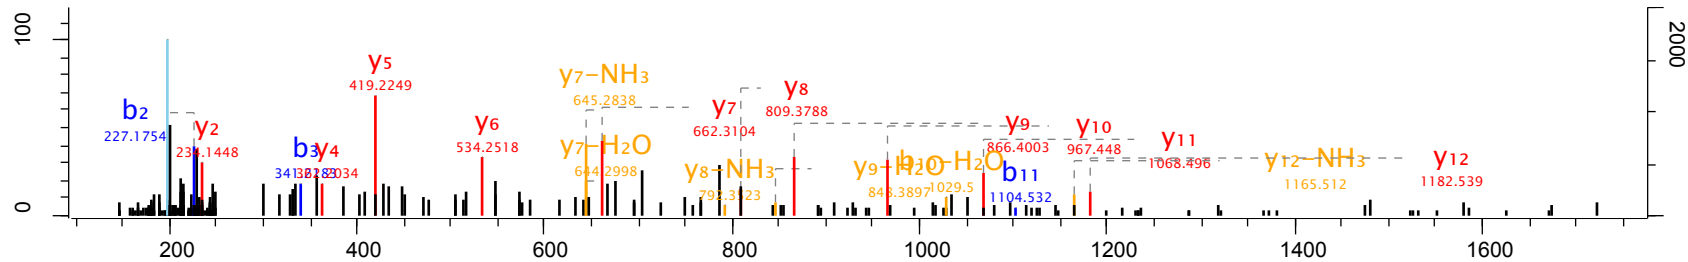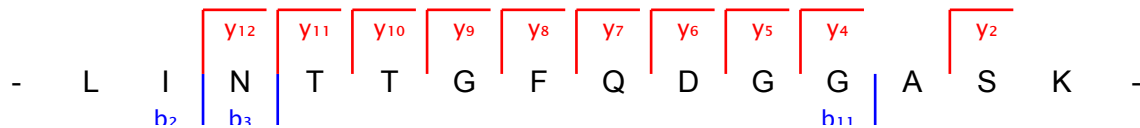

Raw file

20150228\_yeast1\_Top\_opt\_B1\_01\_1614

Scan

22036

Method

TOF; CID

Score

67.76

m/z

754.72

Gene names

HRD1

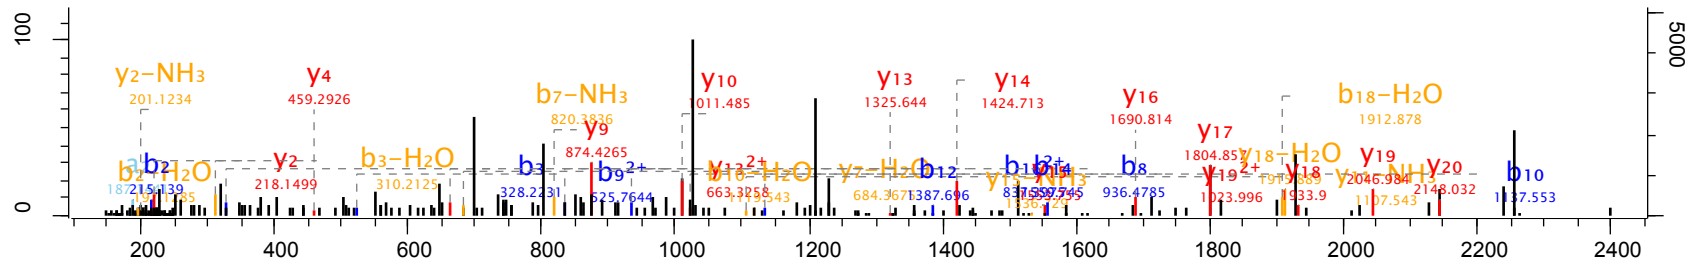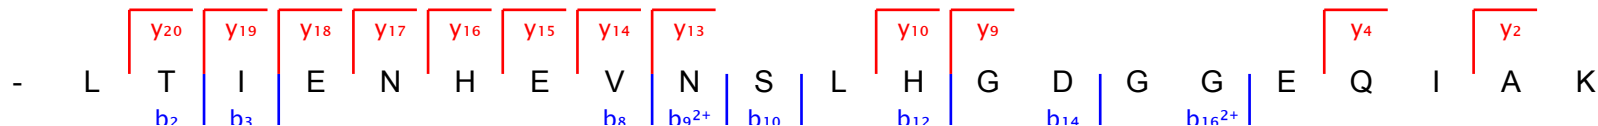



| Raw file                           | Scan  | Method   | Score  | m/z    | Gene names |
|------------------------------------|-------|----------|--------|--------|------------|
| 20150228_yeast1_Top_opt_B1_01_1614 | 22487 | TOF; CID | 108.98 | 434.91 | EDC1       |

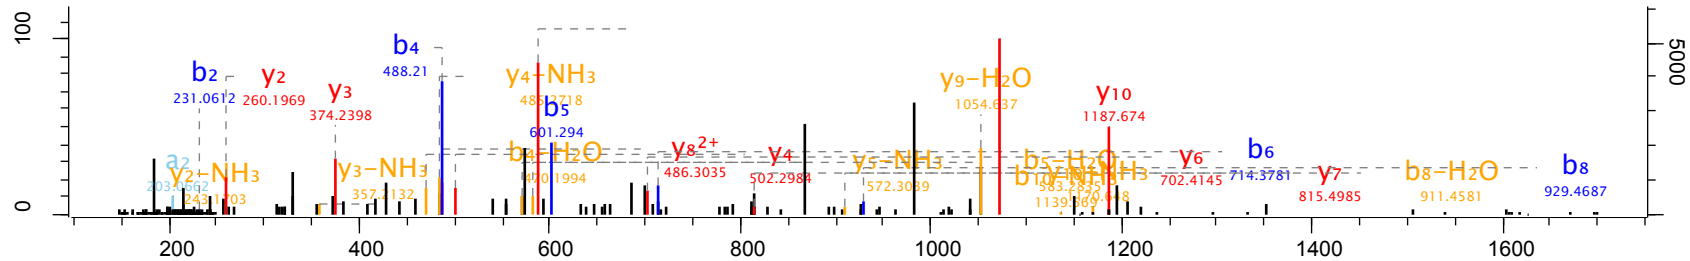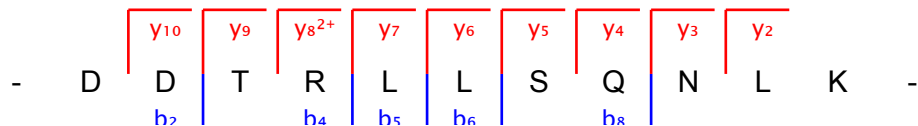

| Raw file                           | Scan  | Method   | Score | m/z   | Gene names |
|------------------------------------|-------|----------|-------|-------|------------|
| 20150228_yeast1_Top_opt_B1_01_1614 | 23048 | TOF; CID | 96.71 | 794.4 | VPS36      |

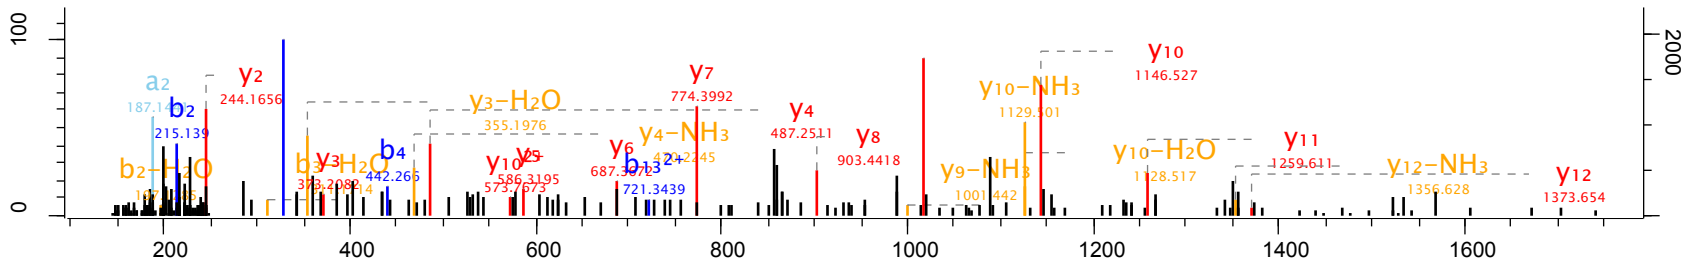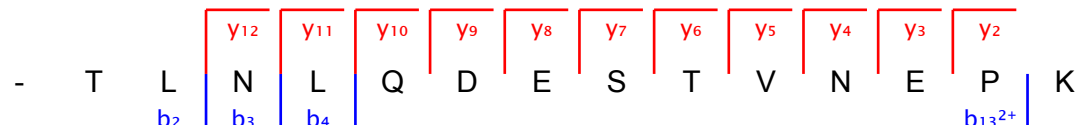

| Raw file                           | Scan  | Method   | Score | m/z   | Gene names |
|------------------------------------|-------|----------|-------|-------|------------|
| 20150228_yeast1_Top_opt_B1_01_1614 | 23121 | TOF; CID | 58.08 | 824.4 | YLR036C    |

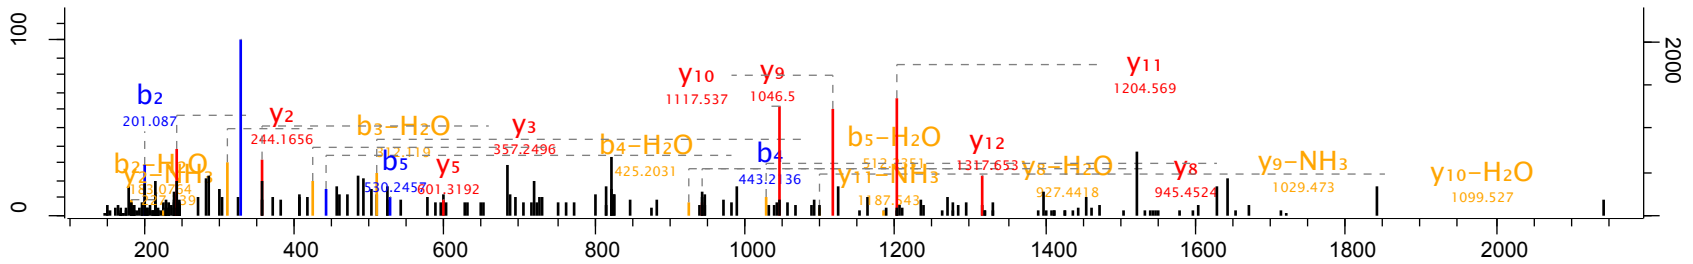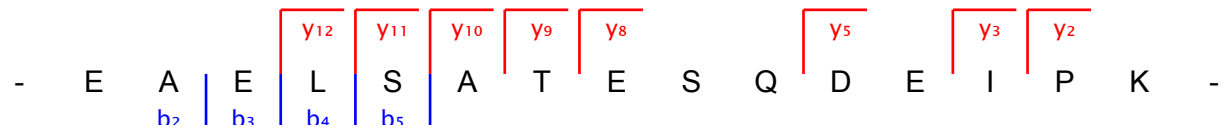

Raw file

Scan

Method

Score

m/z

Gene names

20150228\_yeast1\_Top\_opt\_B1\_01\_1614

23693

TOF; CID

57.17

680.35

HSK3

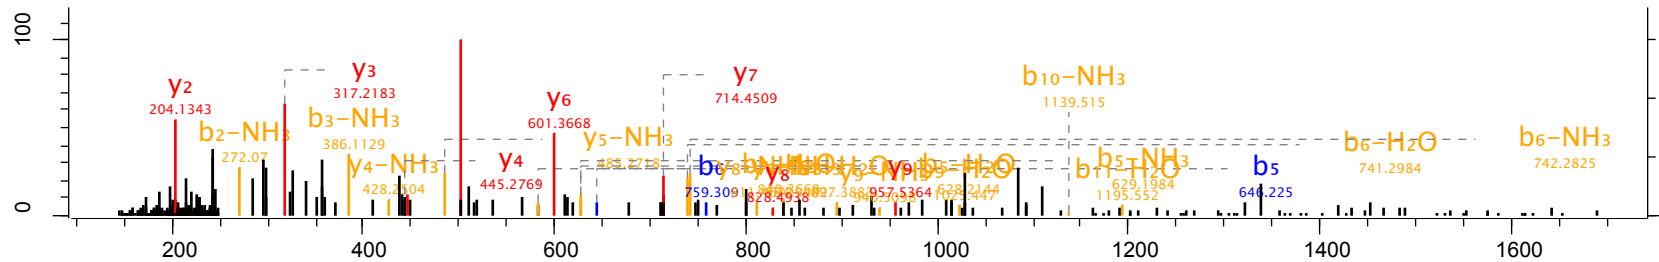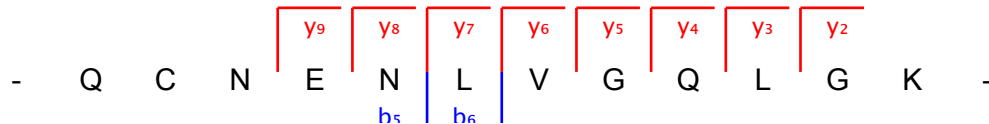

| Raw file                           | Scan  | Method   | Score | m/z    | Gene names |
|------------------------------------|-------|----------|-------|--------|------------|
| 20150228_yeast1_Top_opt_B1_01_1614 | 23726 | TOF; CID | 95.07 | 812.88 | HLR1       |

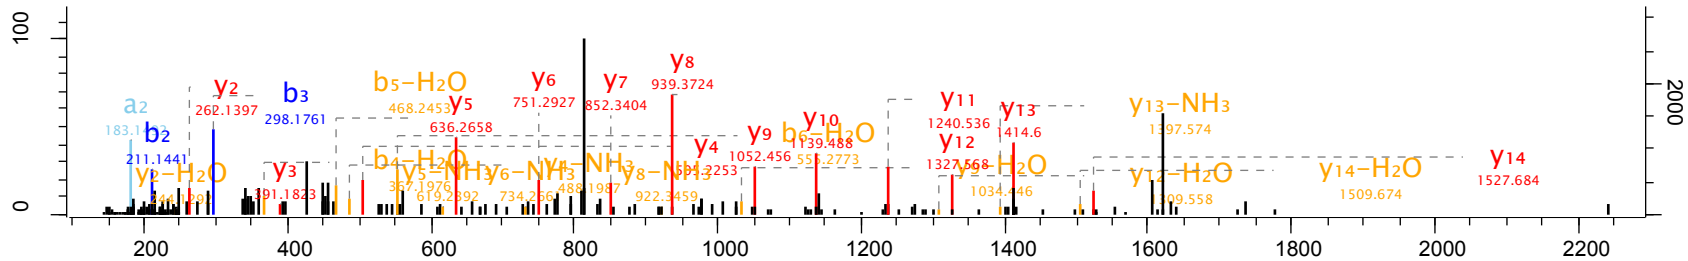

- P L S S T S L S T D M N E D K -

b<sub>2</sub> b<sub>3</sub>

y<sub>14</sub> y<sub>13</sub> y<sub>12</sub> y<sub>11</sub> y<sub>10</sub> y<sub>9</sub> y<sub>8</sub> y<sub>7</sub> y<sub>6</sub> y<sub>5</sub> y<sub>4</sub> y<sub>3</sub> y<sub>2</sub>

| Raw file                           | Scan  | Method   | Score | m/z    | Gene names |
|------------------------------------|-------|----------|-------|--------|------------|
| 20150228_yeast1_Top_opt_B1_01_1614 | 23913 | TOF; CID | 48.29 | 568.62 | NQM1       |

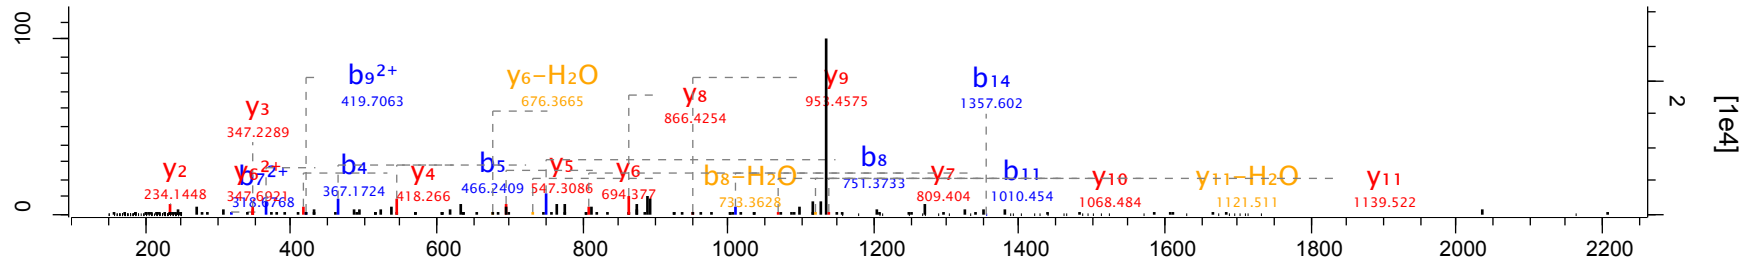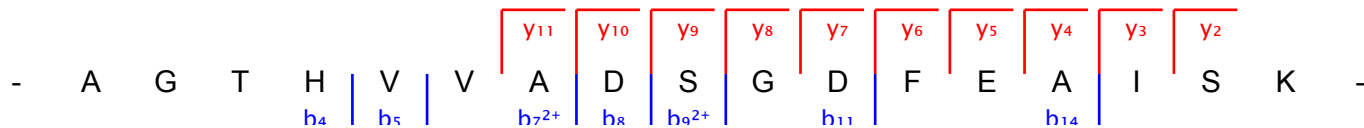

Raw file

Scan

Method

Score

m/z

Gene names

20150228\_yeast1\_Top\_opt\_B1\_01\_1614

24091

TOF; CID

88.34

651.37

MUD1

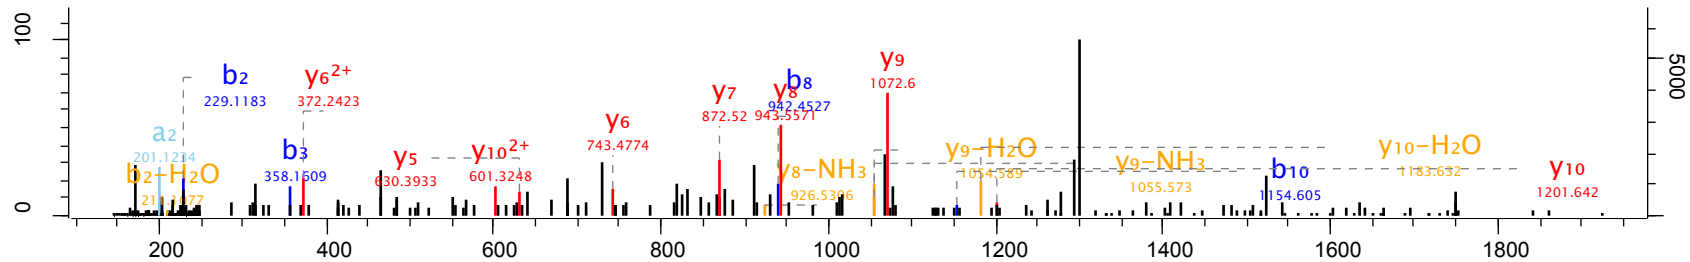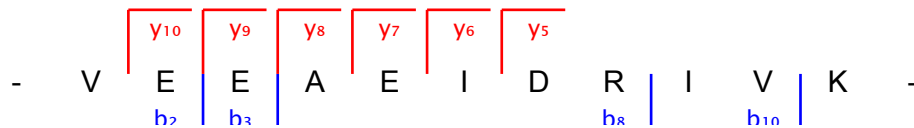

| Raw file                           | Scan  | Method   | Score | m/z    | Gene names |
|------------------------------------|-------|----------|-------|--------|------------|
| 20150228_yeast1_Top_opt_B1_01_1614 | 24748 | TOF; CID | 50.09 | 536.28 | KEI1       |

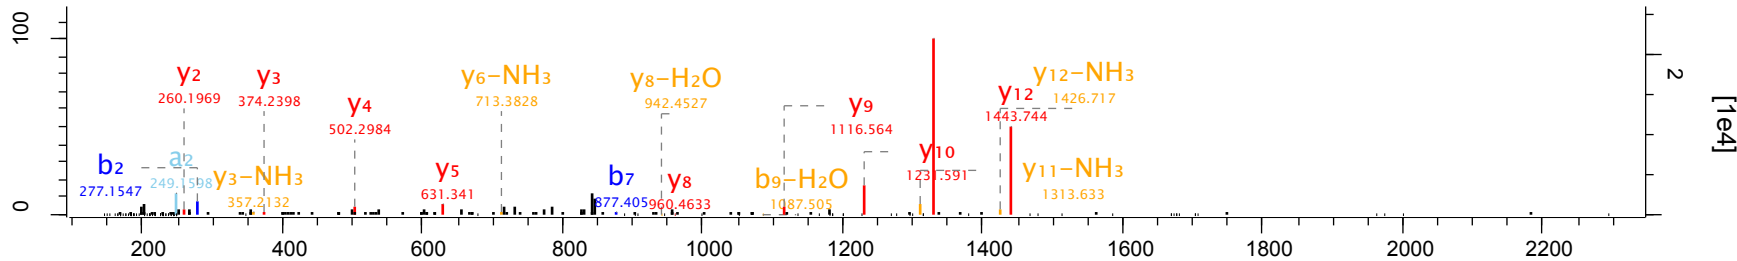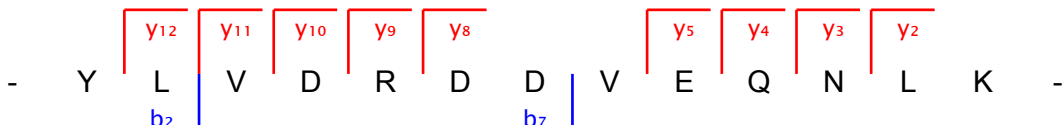



| Raw file                           | Scan  | Method   | Score | m/z    | Gene names |
|------------------------------------|-------|----------|-------|--------|------------|
| 20150228_yeast1_Top_opt_B1_01_1614 | 25650 | TOF; CID | 77.06 | 640.83 | CTP1       |

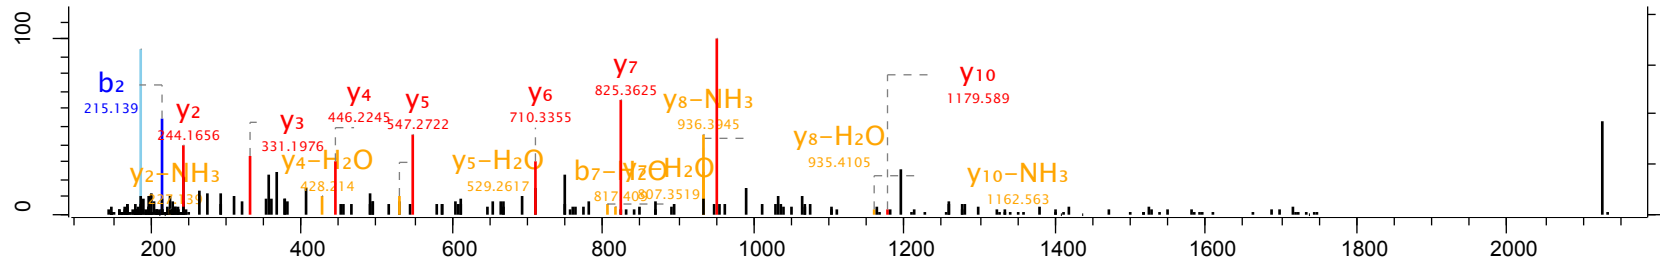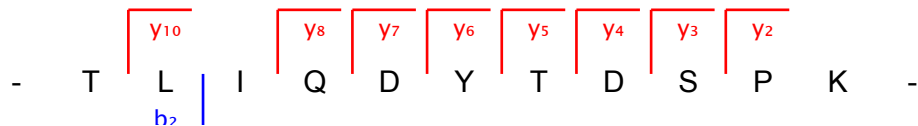

Raw file

20150228\_yeast1\_Top\_opt\_B1\_01\_1614

Scan

25832

Method

TOF; CID

Score

86.94

m/z

571.31

Gene names

YAP1802

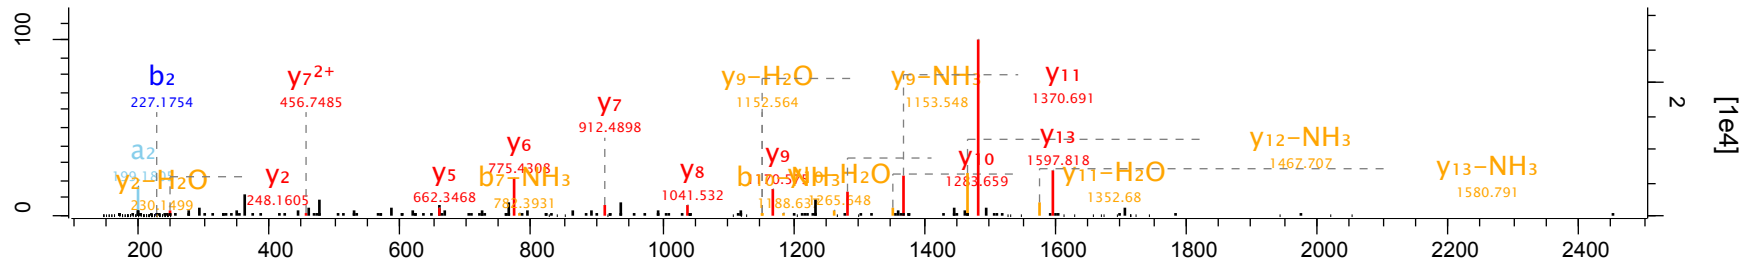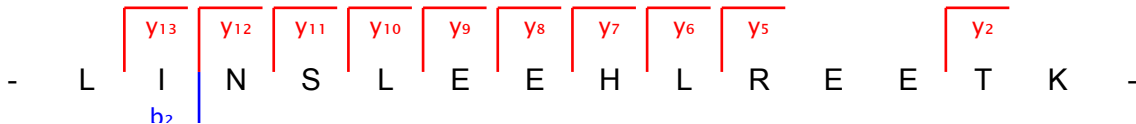

| Raw file                           | Scan  | Method   | Score | m/z   | Gene names |
|------------------------------------|-------|----------|-------|-------|------------|
| 20150228_yeast1_Top_opt_B1_01_1614 | 26201 | TOF; CID | 77.06 | 591.8 | GLN3       |

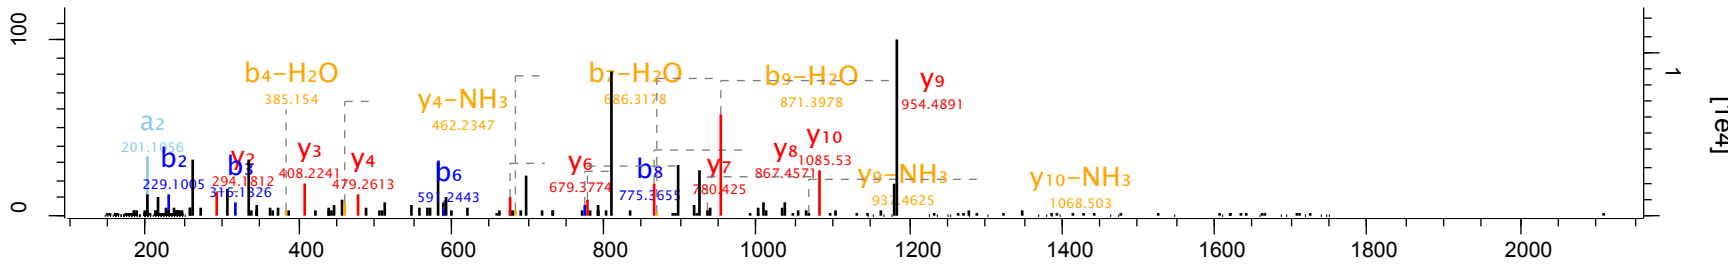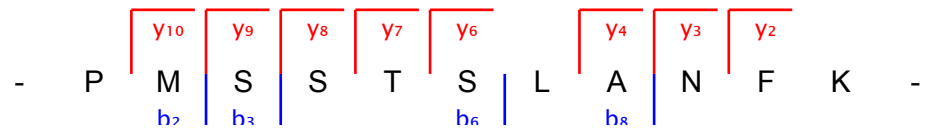

Raw file

20150228\_yeast1\_Top\_opt\_B1\_01\_1614

Scan

26336

Method

TOF; CID

Score

58.27

m/z

453.25

Gene names

DMA2

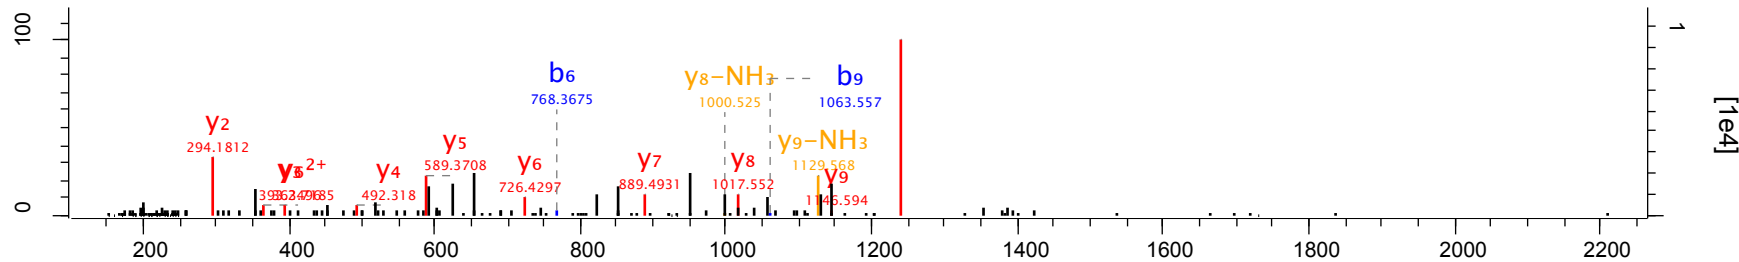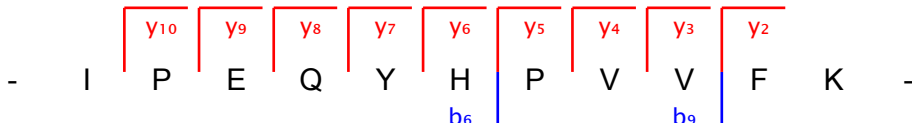

| Raw file                           | Scan  | Method   | Score | m/z    | Gene names |
|------------------------------------|-------|----------|-------|--------|------------|
| 20150228_yeast1_Top_opt_B1_01_1614 | 27223 | TOF; CID | 94.45 | 487.25 | NSG2       |

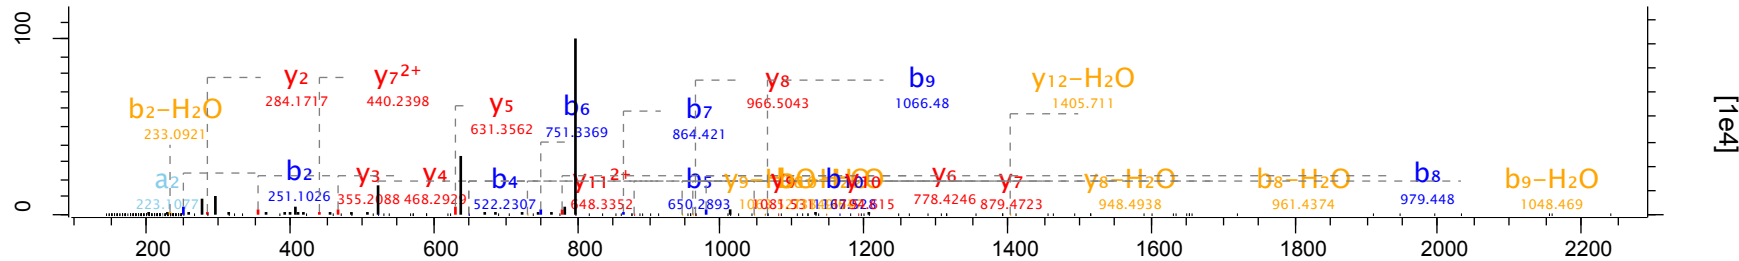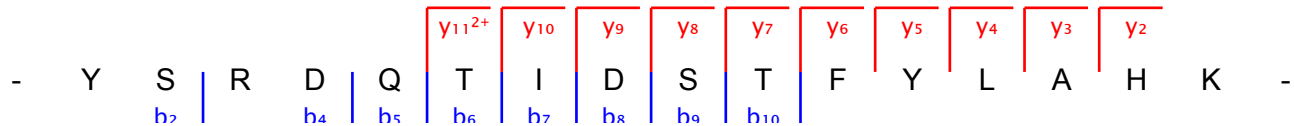

Raw file

20150228\_yeast1\_Top\_opt\_B1\_01\_1614

Scan

27321

Method

TOF; CID

Score

141.18

m/z

955.01

Gene names

RPL20B;RPL20A

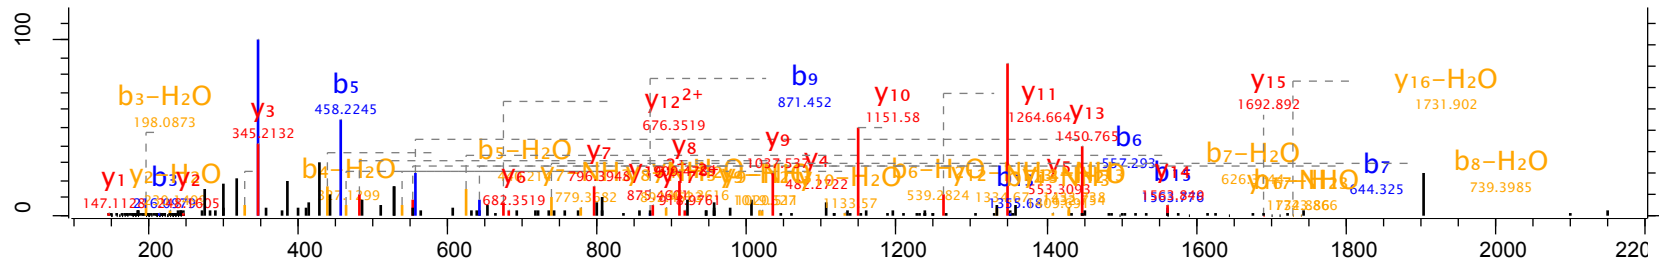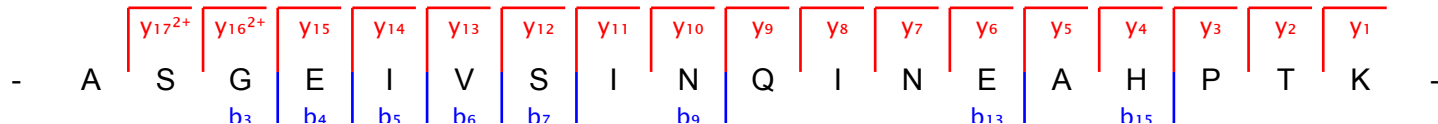

Raw file  
 20150228\_yeast1\_Top\_opt\_B1\_01\_1614

| Scan  | Method   | Score | m/z    | Gene names |
|-------|----------|-------|--------|------------|
| 27449 | TOF; CID | 92.27 | 565.65 | MRN1       |

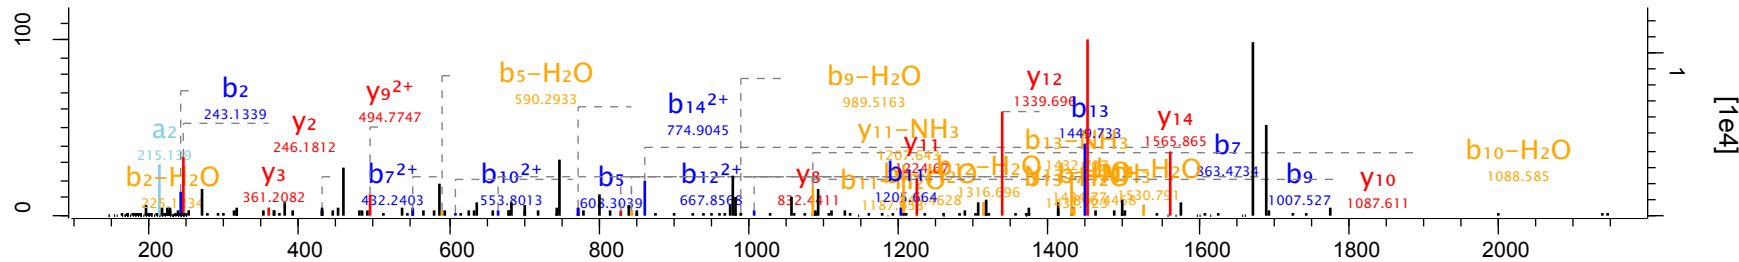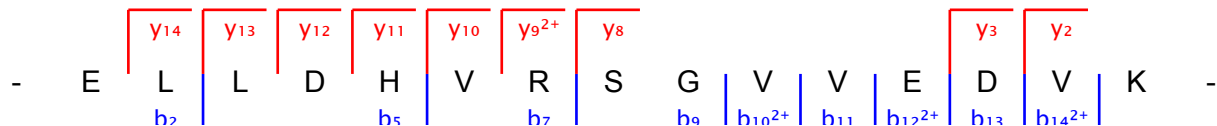

| Raw file                           | Scan  | Method   | Score | m/z    | Gene names |
|------------------------------------|-------|----------|-------|--------|------------|
| 20150228_yeast1_Top_opt_B1_01_1614 | 27654 | TOF; CID | 55.68 | 428.27 | PEX22      |

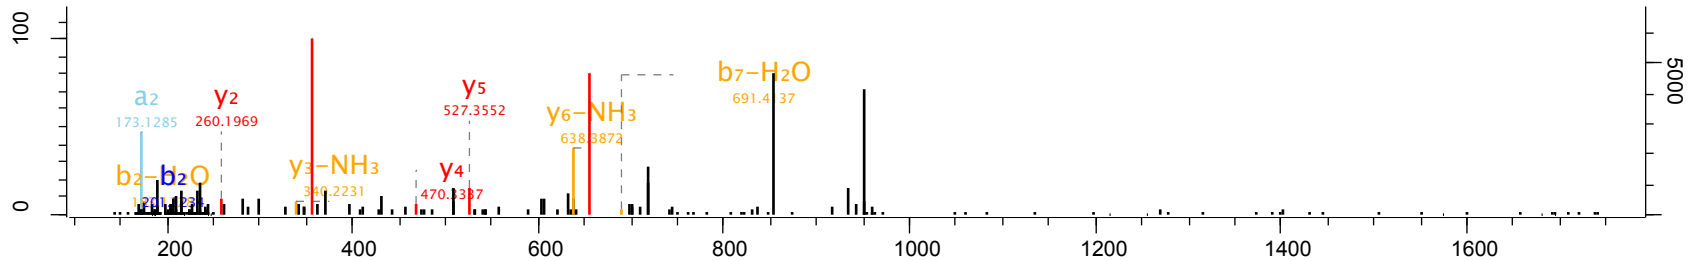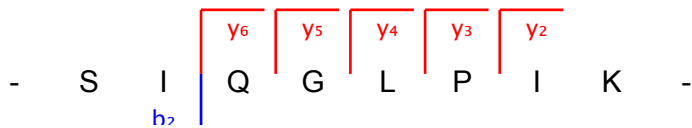



| Raw file                           | Scan  | Method   | Score | m/z    | Gene names |
|------------------------------------|-------|----------|-------|--------|------------|
| 20150228_yeast1_Top_opt_B1_01_1614 | 27751 | TOF; CID | 86.26 | 689.36 | ERG2       |

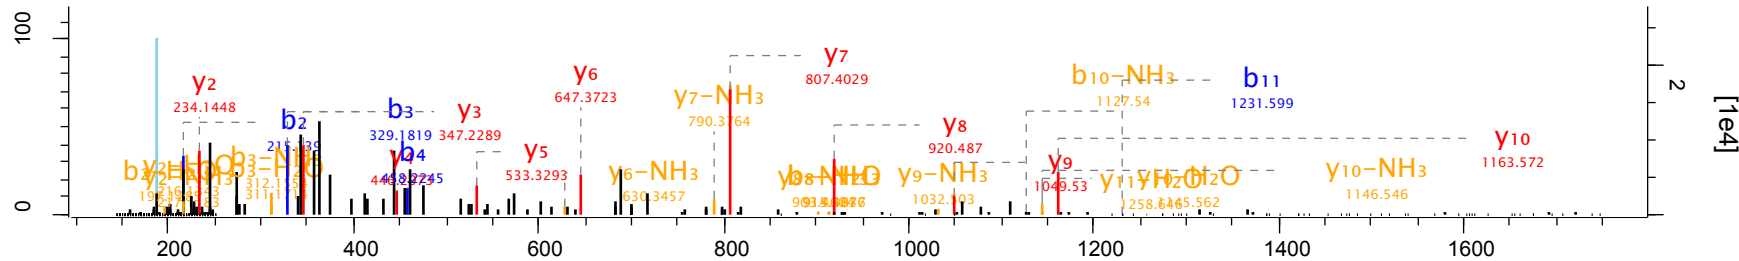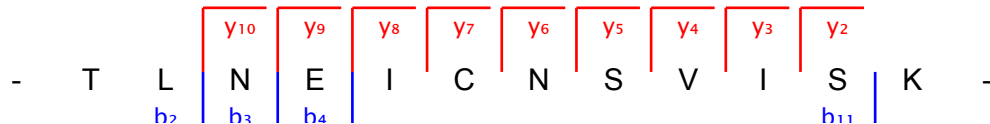

| Raw file                           | Scan  | Method   | Score | m/z    | Gene names |
|------------------------------------|-------|----------|-------|--------|------------|
| 20150228_yeast1_Top_opt_B1_01_1614 | 27837 | TOF; CID | 69.35 | 726.39 | BCS1       |

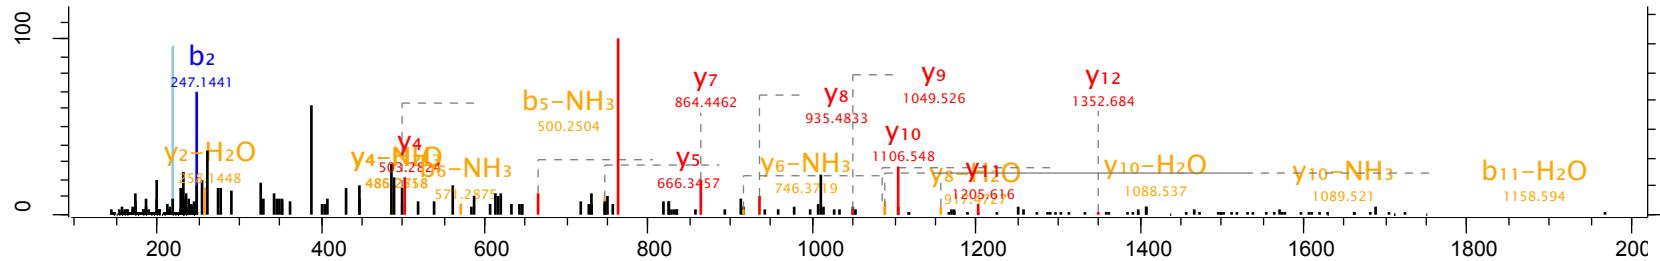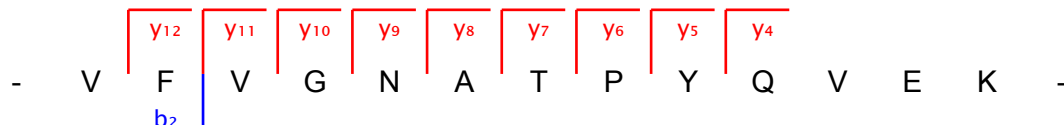

| Raw file                           | Scan  | Method   | Score | m/z    | Gene names |
|------------------------------------|-------|----------|-------|--------|------------|
| 20150228_yeast1_Top_opt_B1_01_1614 | 27895 | TOF; CID | 72.14 | 419.24 | YKL071W    |

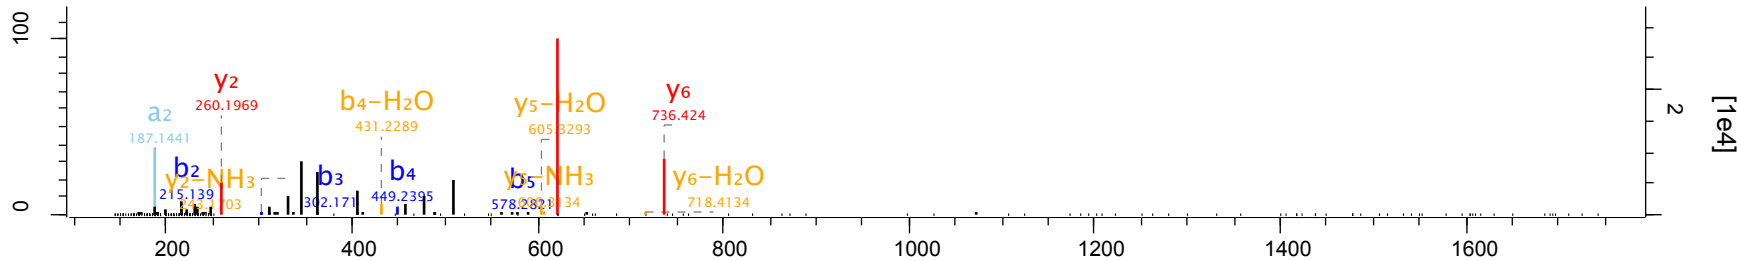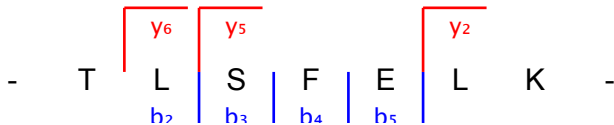

Raw file

Scan

Method

Score

m/z

Gene names

20150228\_yeast1\_Top\_opt\_B1\_01\_1614

28414

TOF; CID

111.12

866.4

MID2

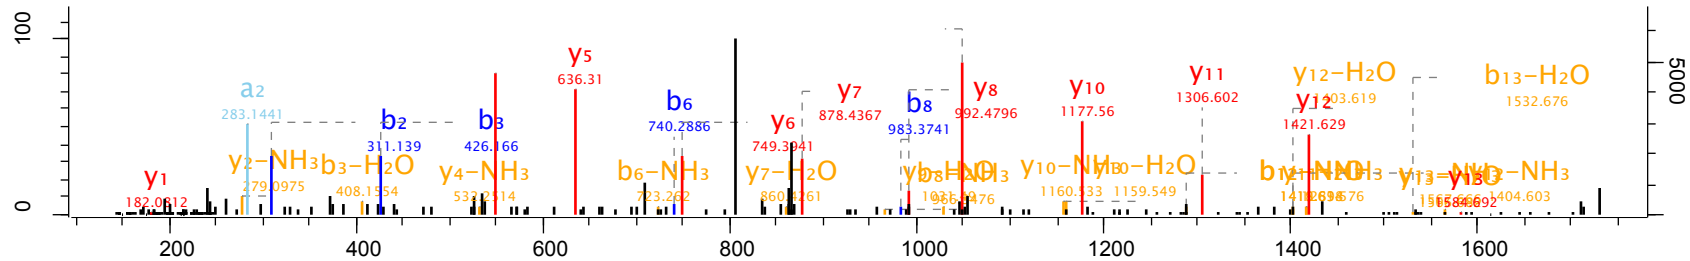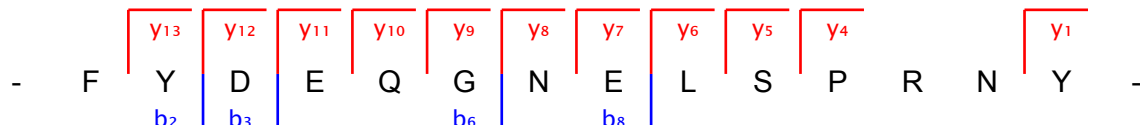

| Raw file                           | Scan  | Method   | Score | m/z    | Gene names |
|------------------------------------|-------|----------|-------|--------|------------|
| 20150228_yeast1_Top_opt_B1_01_1614 | 28985 | TOF; CID | 44.02 | 583.32 | YML020W    |

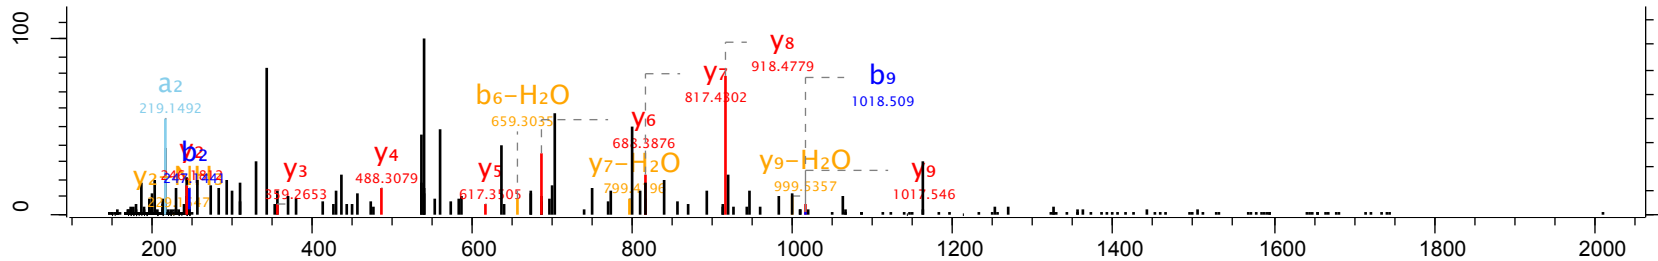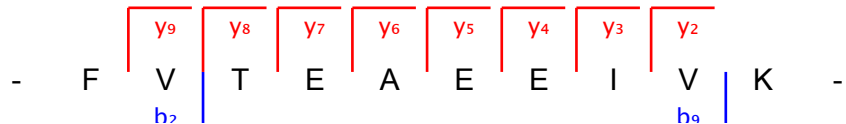

| Raw file                           | Scan  | Method   | Score | m/z    | Gene names |
|------------------------------------|-------|----------|-------|--------|------------|
| 20150228_yeast1_Top_opt_B1_01_1614 | 29167 | TOF; CID | 80.44 | 514.26 | RPC25      |

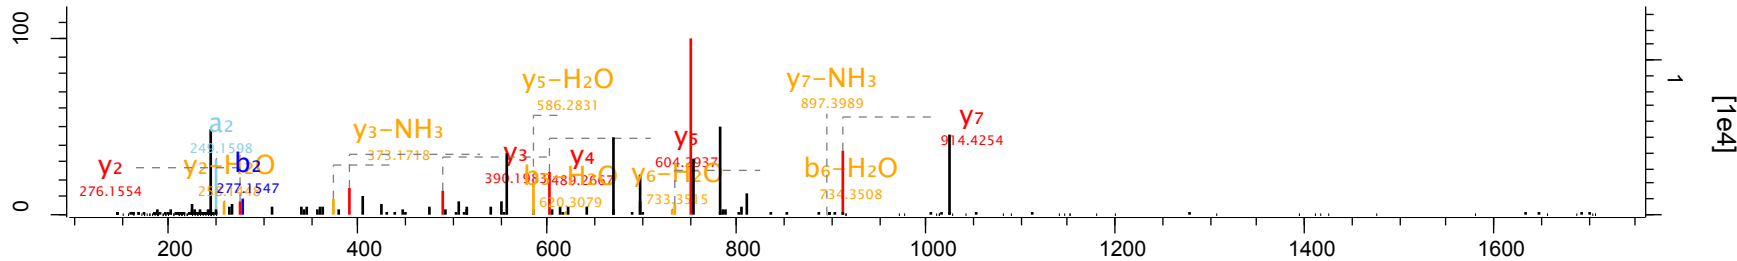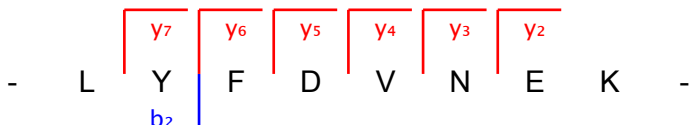

Raw file

20150228\_yeast1\_Top\_opt\_B1\_01\_1614

Scan

29763

Method

TOF; CID

Score

69.26

m/z

781.41

Gene names

PRP38

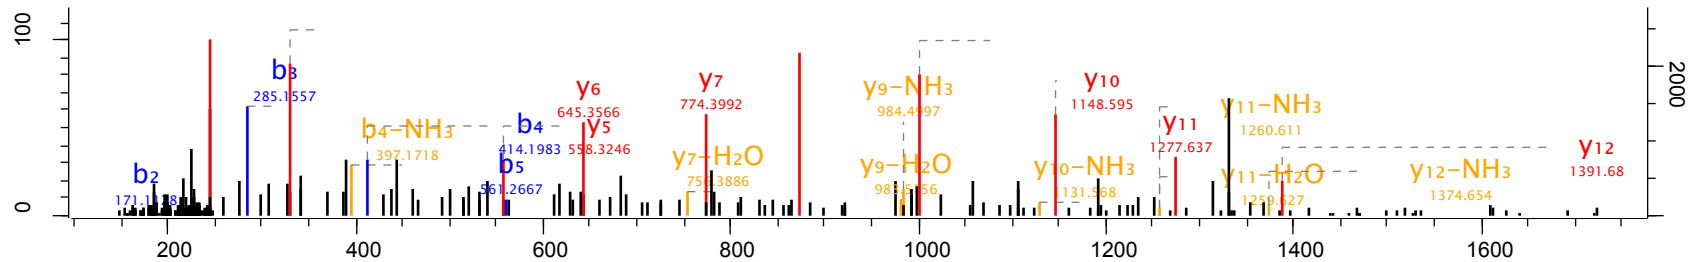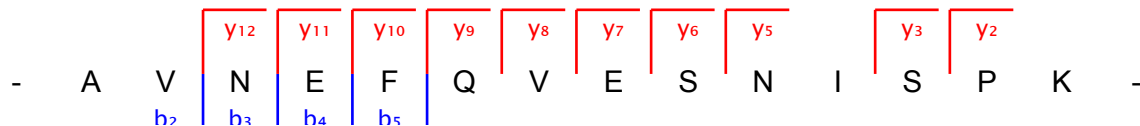

| Raw file                           | Scan  | Method   | Score | m/z    | Gene names |
|------------------------------------|-------|----------|-------|--------|------------|
| 20150228_yeast1_Top_opt_B1_01_1614 | 29812 | TOF; CID | 60.73 | 629.29 | ATG18      |

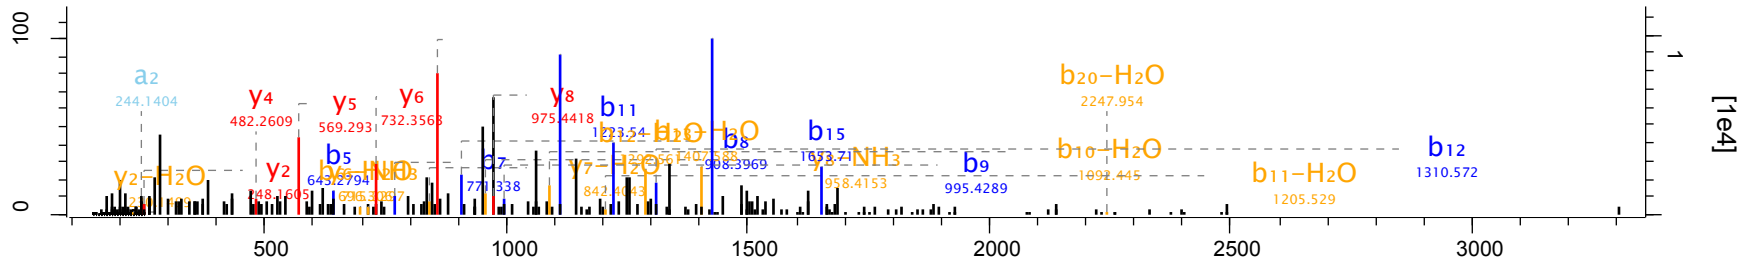

- R D Q Q D A G H S D I S D L D Q Y S S F T

a2 | b5 | b7 | b8 | b9 | b10 | b11 | b12 | b13 | b15

y8 | y7 | y6 | y5 | y4 | y2



Raw file

Scan

Method

Score

m/z

Gene names

20150228\_yeast1\_Top\_opt\_B1\_01\_1614

29815

TOF; CID

77.32

602.99

SBE2

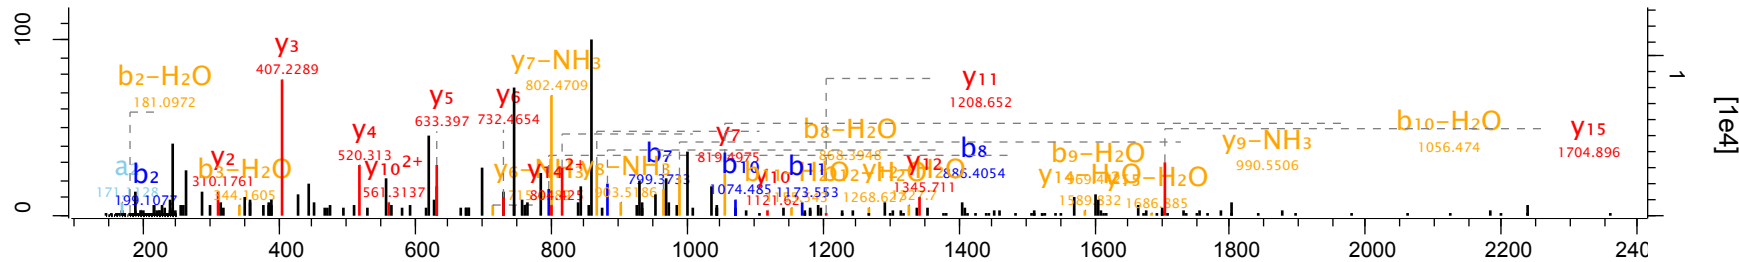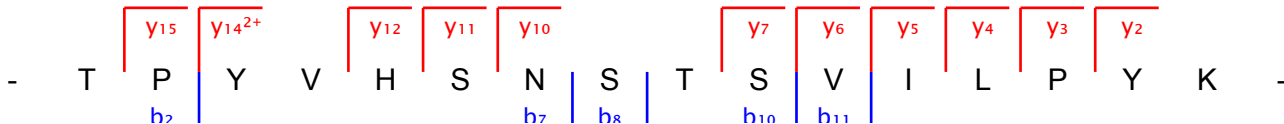

| Raw file                           | Scan  | Method   | Score | m/z    | Gene names |
|------------------------------------|-------|----------|-------|--------|------------|
| 20150228_yeast1_Top_opt_B1_01_1614 | 29816 | TOF; CID | 78.15 | 512.26 | DBR1       |

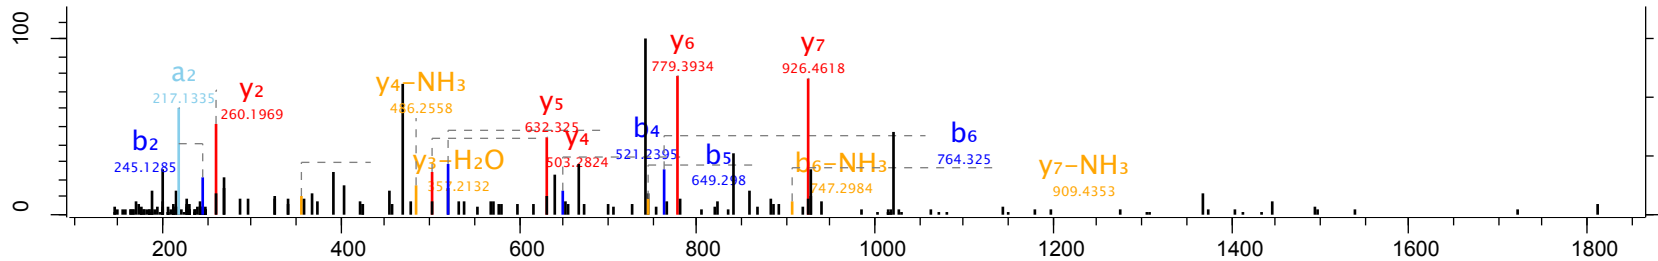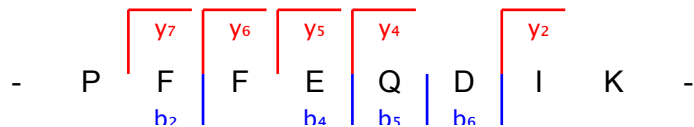

| Raw file                           | Scan  | Method   | Score | m/z   | Gene names |
|------------------------------------|-------|----------|-------|-------|------------|
| 20150228_yeast1_Top_opt_B1_01_1614 | 30697 | TOF; CID | 41.29 | 722.4 | SLM5       |

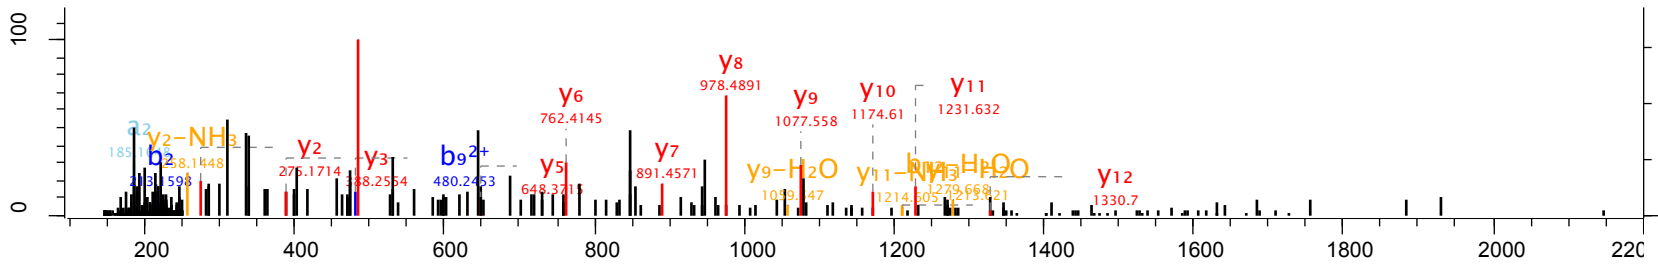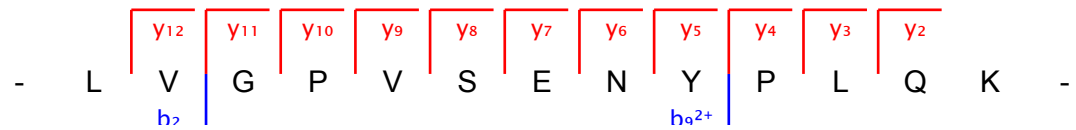

| Raw file                           | Scan  | Method   | Score | m/z    | Gene names |
|------------------------------------|-------|----------|-------|--------|------------|
| 20150228_yeast1_Top_opt_B1_01_1614 | 30945 | TOF; CID | 73.5  | 548.79 | MPS2       |

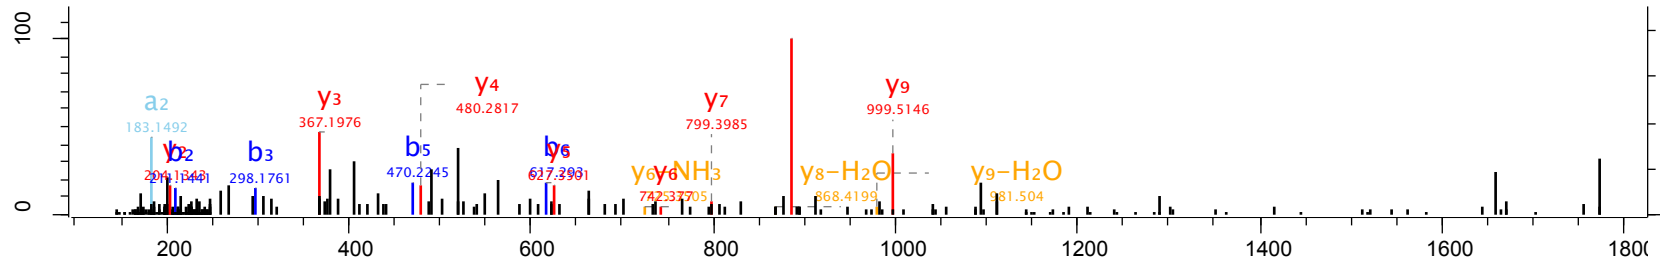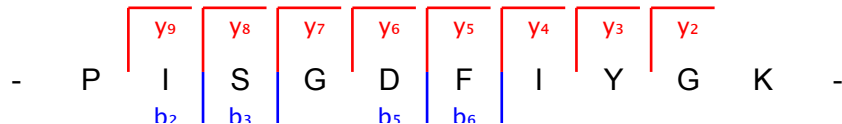

| Raw file                           | Scan  | Method   | Score | m/z    | Gene names |
|------------------------------------|-------|----------|-------|--------|------------|
| 20150228_yeast1_Top_opt_B1_01_1614 | 31423 | TOF; CID | 47.99 | 660.84 | UBA4       |

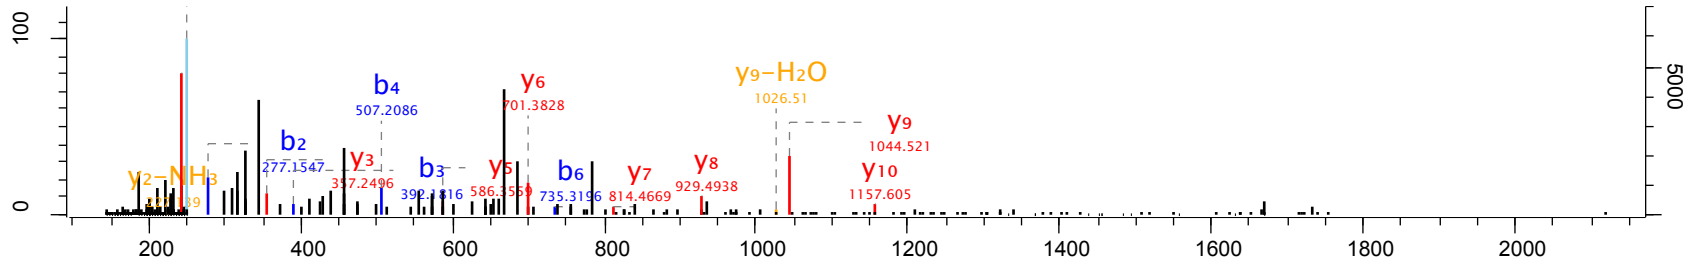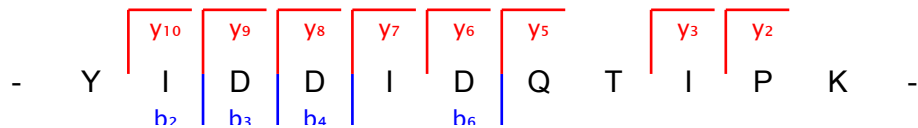

Raw file

Scan

Method

Score

m/z

Gene names

20150228\_yeast1\_Top\_opt\_B1\_01\_1614

31454

TOF; CID

65.22

482.27

DIB1

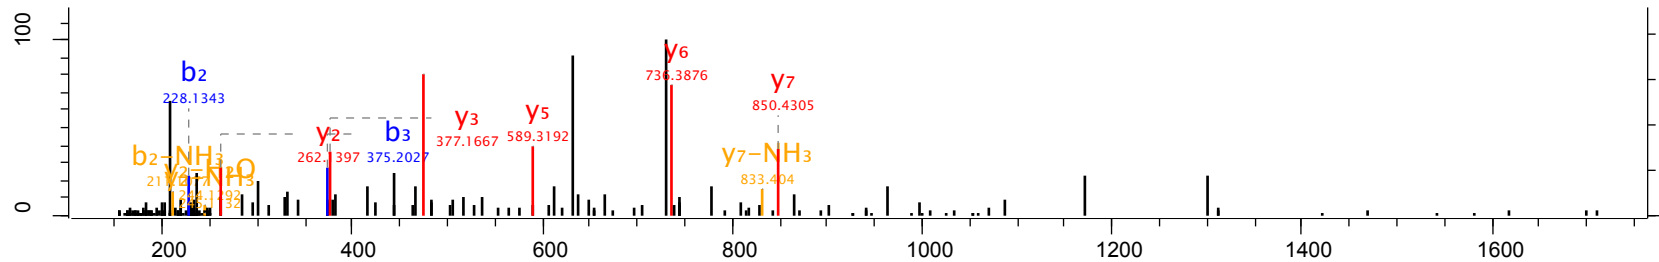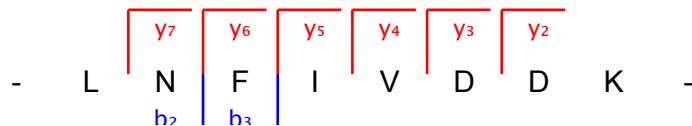

| Raw file                           | Scan  | Method   | Score | m/z    | Gene names |
|------------------------------------|-------|----------|-------|--------|------------|
| 20150228_yeast1_Top_opt_B1_01_1614 | 31745 | TOF; CID | 48.57 | 438.57 | YPR084W    |

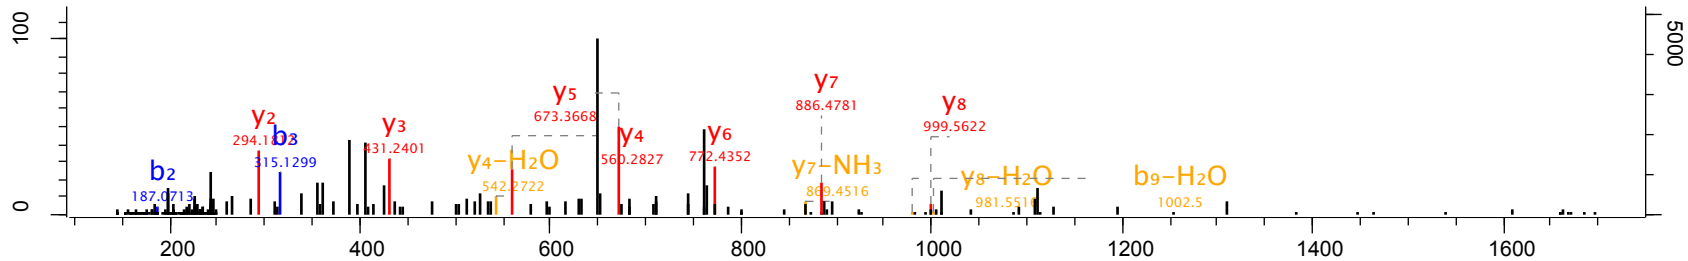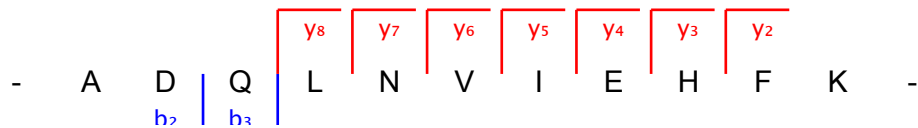

| Raw file                           | Scan  | Method   | Score | m/z    | Gene names |
|------------------------------------|-------|----------|-------|--------|------------|
| 20150228_yeast1_Top_opt_B1_01_1614 | 32208 | TOF; CID | 49.3  | 545.77 | TAT2       |

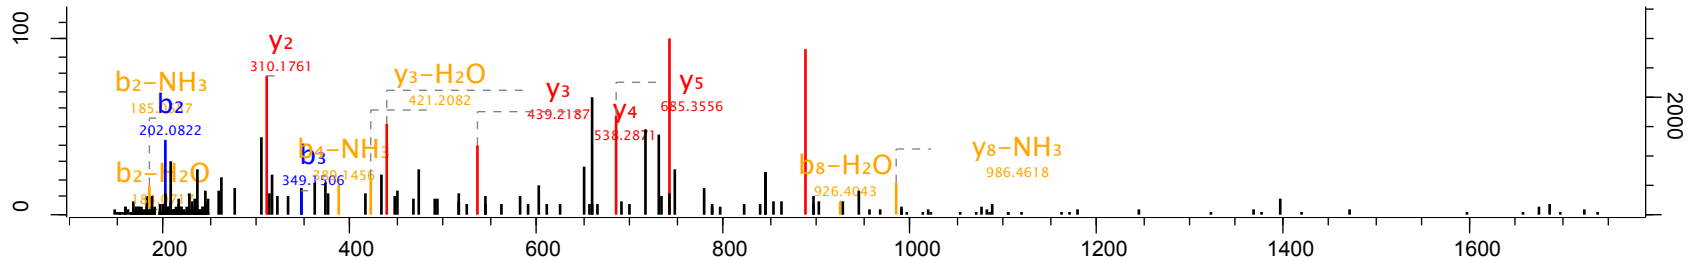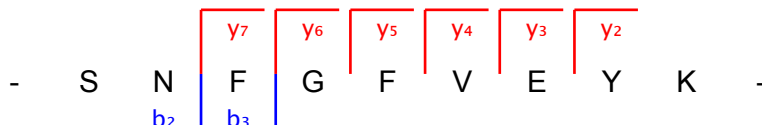



| Raw file                           | Scan  | Method   | Score | m/z    | Gene names |
|------------------------------------|-------|----------|-------|--------|------------|
| 20150228_yeast1_Top_opt_B1_01_1614 | 32788 | TOF; CID | 82.28 | 451.29 | STB4       |

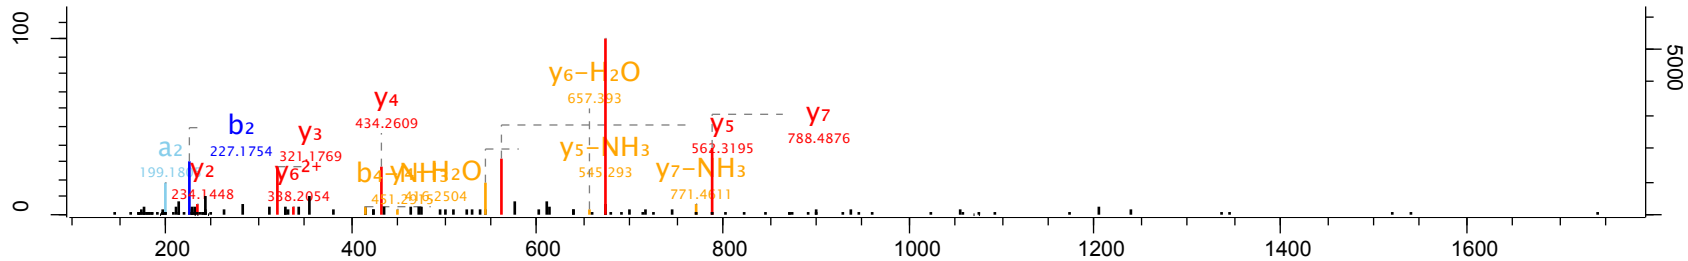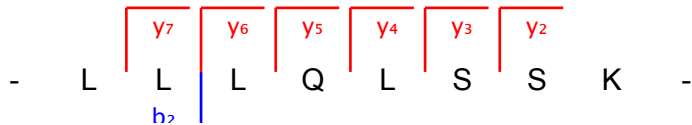

| Raw file                           | Scan  | Method   | Score | m/z    | Gene names |
|------------------------------------|-------|----------|-------|--------|------------|
| 20150228_yeast1_Top_opt_B1_01_1614 | 33214 | TOF; CID | 43.4  | 694.87 | YEL020C    |

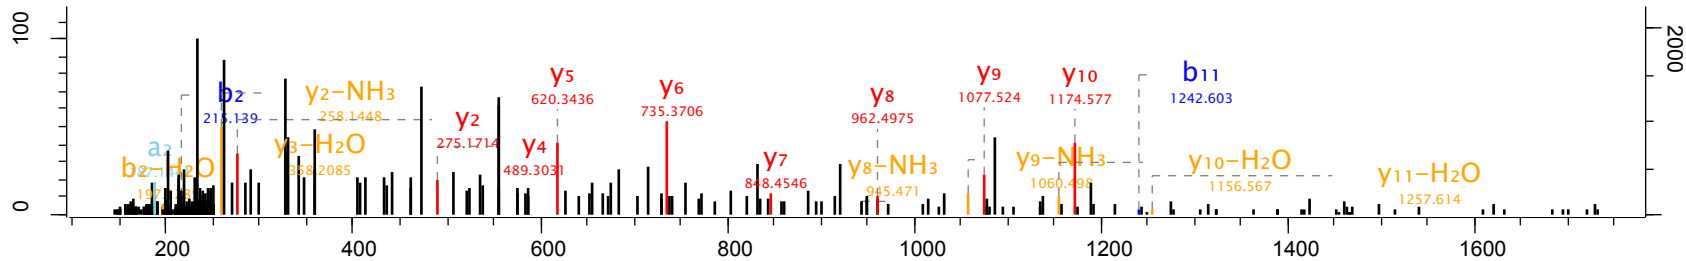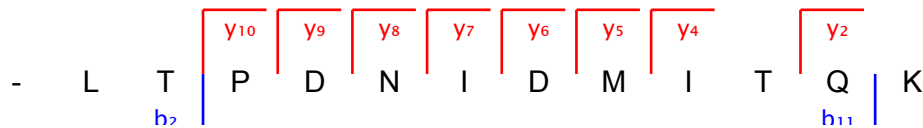

| Raw file                           | Scan  | Method   | Score | m/z    | Gene names |
|------------------------------------|-------|----------|-------|--------|------------|
| 20150228_yeast1_Top_opt_B1_01_1614 | 33501 | TOF; CID | 50.09 | 709.37 | HSH49      |

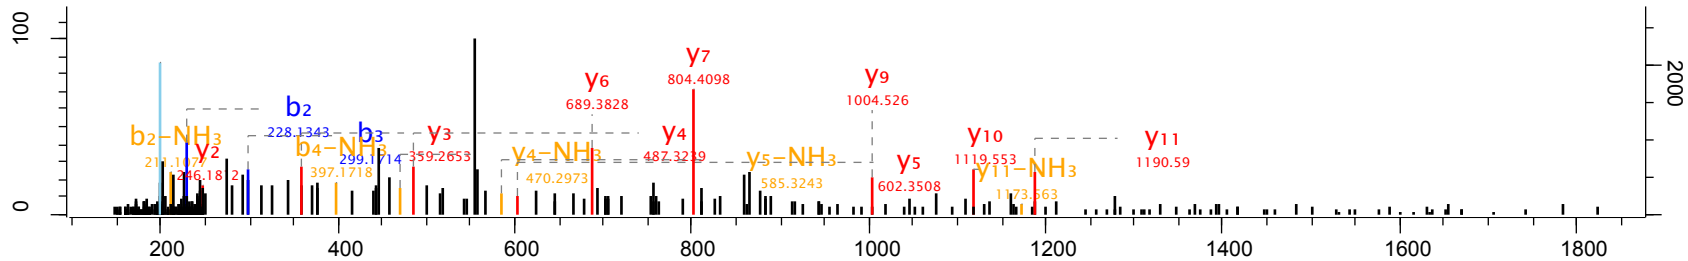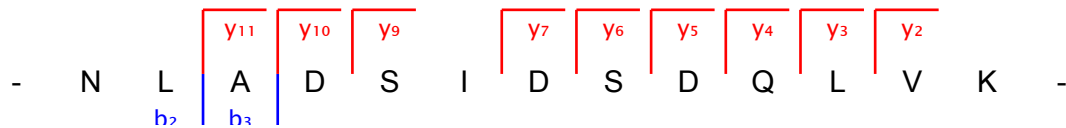

| Raw file                           | Scan  | Method   | Score | m/z    | Gene names |
|------------------------------------|-------|----------|-------|--------|------------|
| 20150228_yeast1_Top_opt_B1_01_1614 | 34116 | TOF; CID | 64.12 | 618.87 | PTP1       |

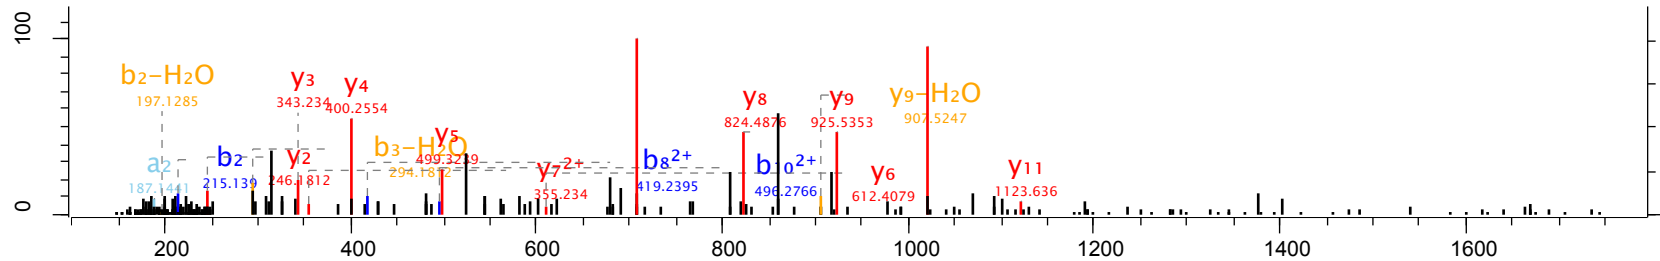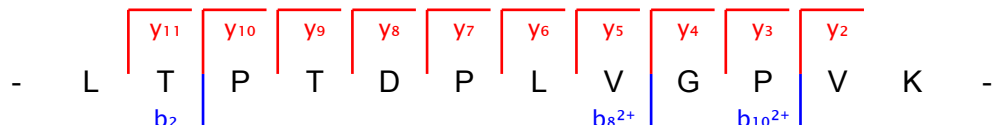

Raw file

Scan

Method

Score

m/z

20150228\_yeast1\_Top\_opt\_B1\_01\_1614

34496

TOF; CID

100.43

497.63

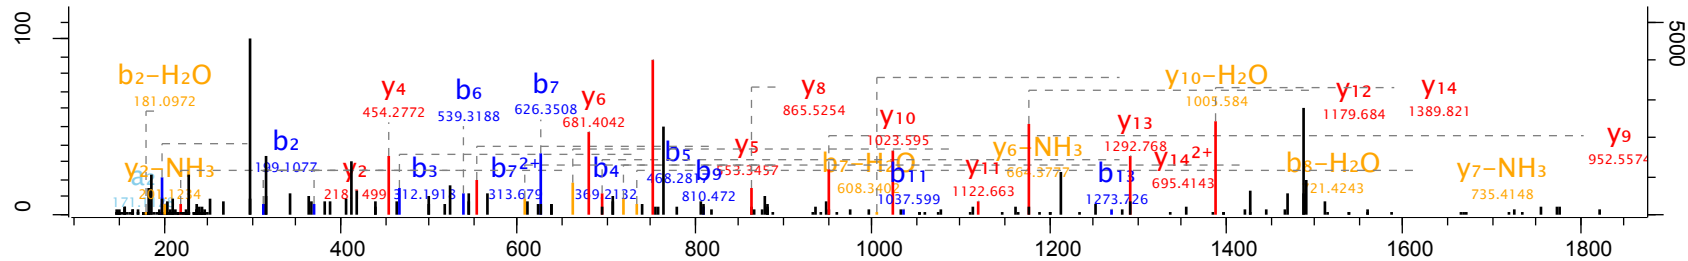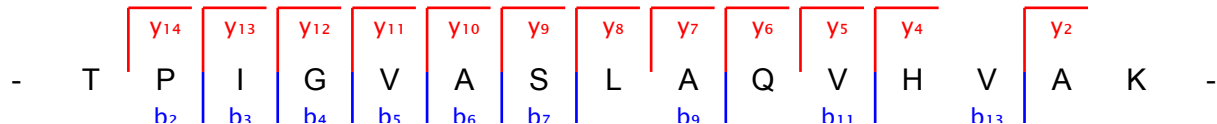

Raw file

Scan

Method

Score

m/z

Gene names

20150228\_yeast1\_Top\_opt\_B1\_01\_1614

34702

TOF; CID

94.12

725.88

OPT1

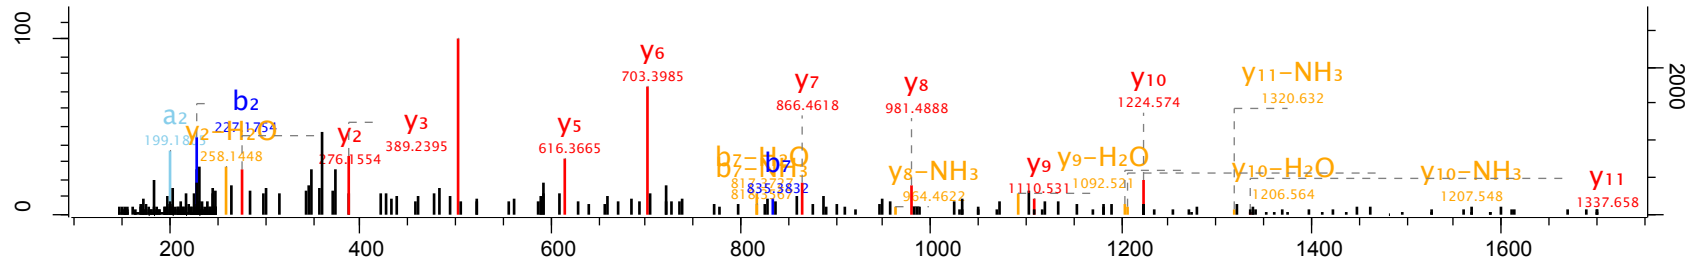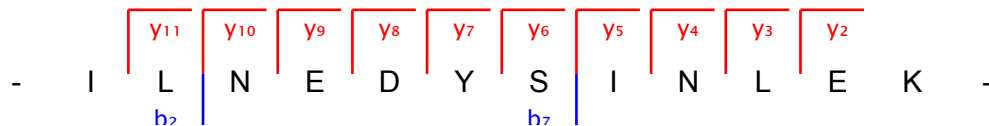

Raw file

Scan

Method

Score

m/z

Gene names

20150228\_yeast1\_Top\_opt\_B1\_01\_1614

34931

TOF; CID

136.24

495.26

IRA1

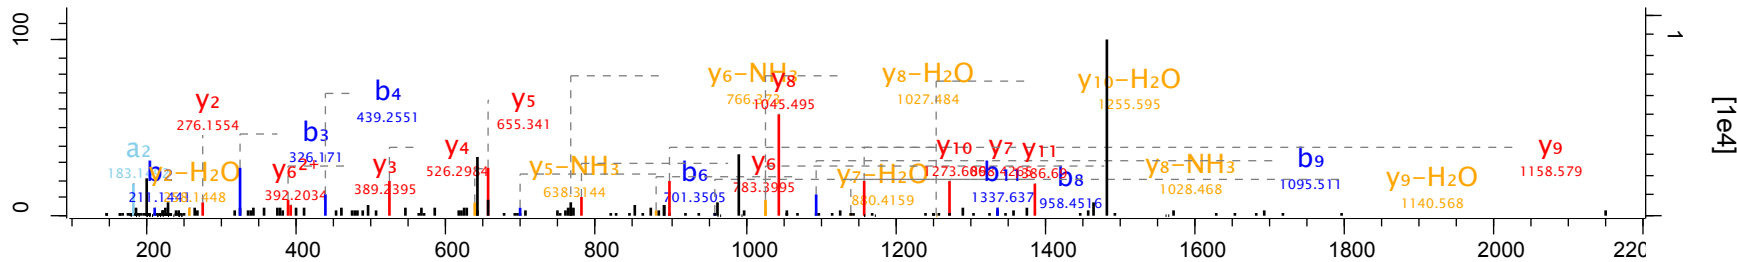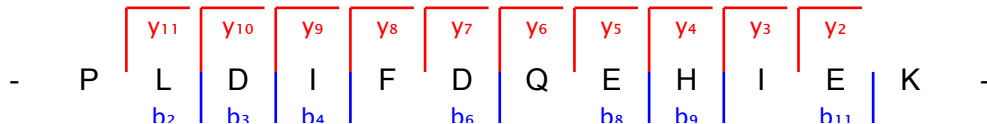

| Raw file                           | Scan  | Method   | Score | m/z    | Gene names |
|------------------------------------|-------|----------|-------|--------|------------|
| 20150228_yeast1_Top_opt_B1_01_1614 | 35116 | TOF; CID | 86.47 | 432.27 | BET2       |

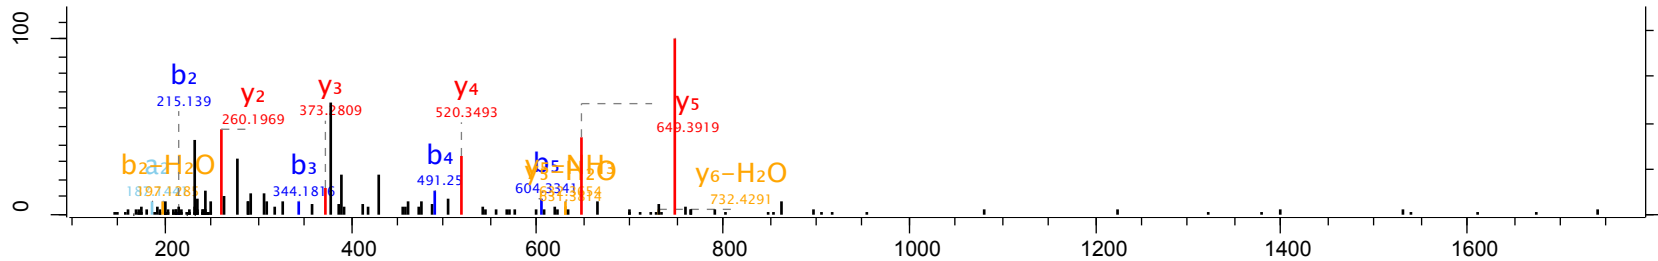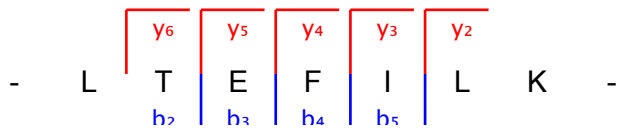



Raw file

20150228\_yeast1\_Top\_opt\_B1\_01\_1614

Scan

35339

Method

TOF; CID

Score

127.83

m/z

910.49

Gene names

BMT2

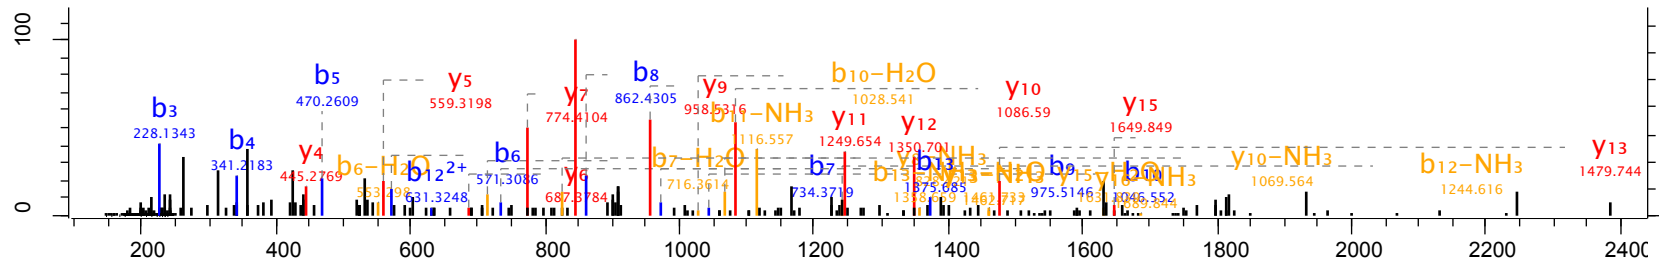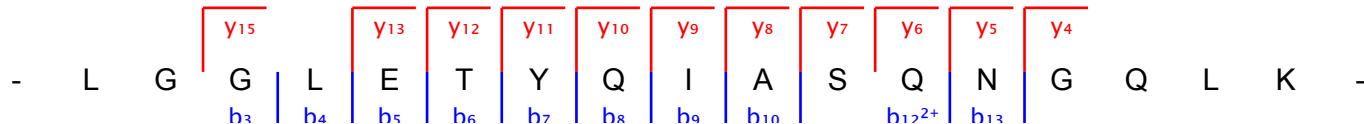

| Raw file                           | Scan  | Method   | Score | m/z   | Gene names |
|------------------------------------|-------|----------|-------|-------|------------|
| 20150228_yeast1_Top_opt_B1_01_1614 | 35416 | TOF; CID | 56.94 | 445.6 | DOC1       |

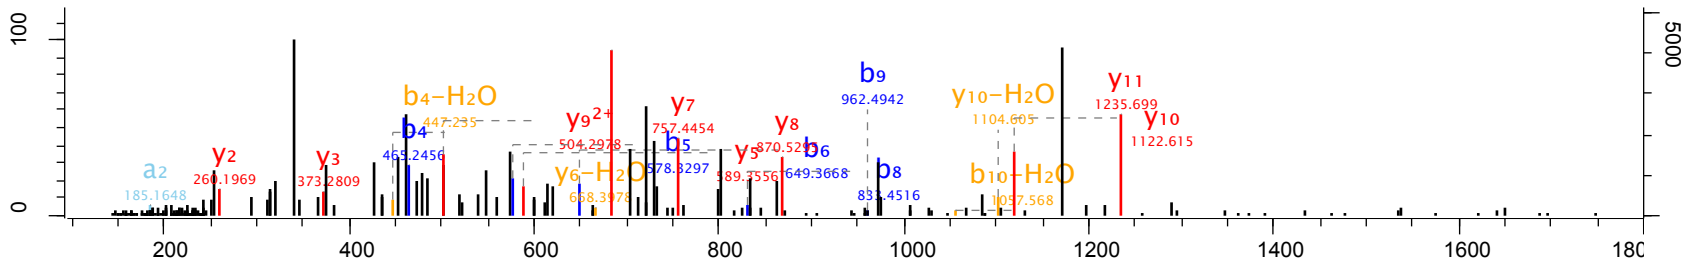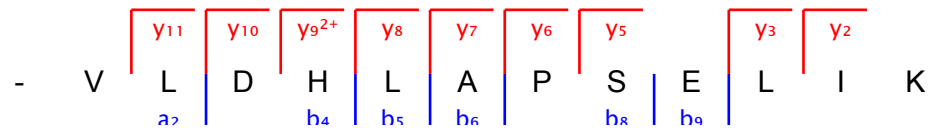

Raw file

20150228\_yeast1\_Top\_opt\_B1\_01\_1614

Scan

35626

Method

TOF; CID

Score

55.37

m/z

460.78

Gene names

SIC1

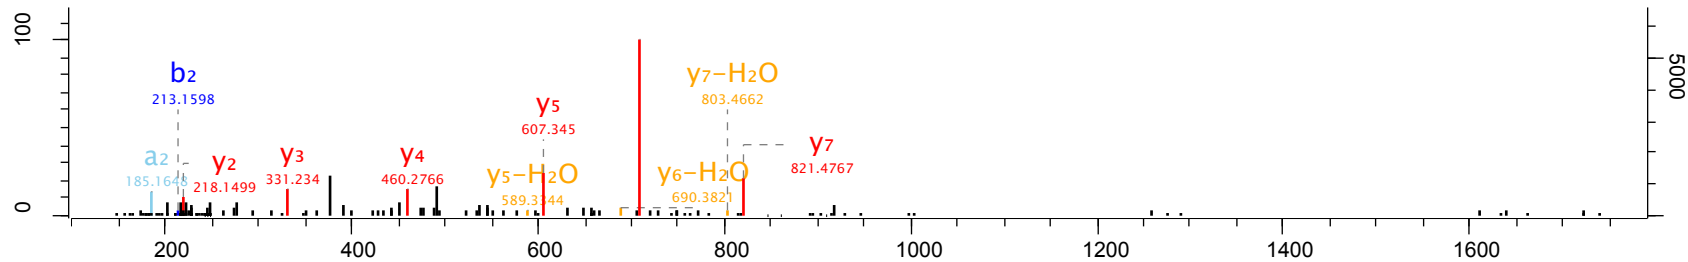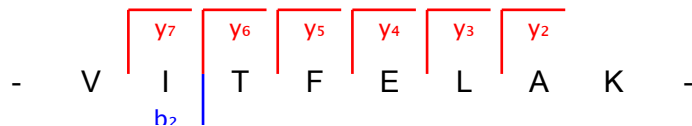

| Raw file                           | Scan  | Method   | Score | m/z    | Gene names |
|------------------------------------|-------|----------|-------|--------|------------|
| 20150228_yeast1_Top_opt_B1_01_1614 | 36334 | TOF; CID | 50.09 | 506.25 | SAF1       |

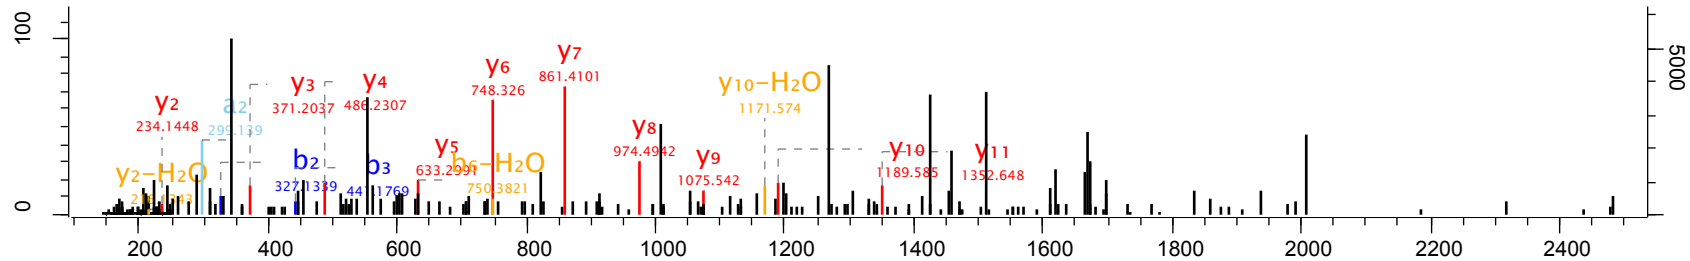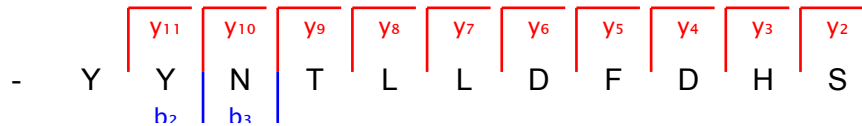

Raw file

20150228\_yeast1\_Top\_opt\_B1\_01\_1614

Scan

36420

Method

TOF; CID

Score

120.11

m/z

985.49

Gene names

TIF6

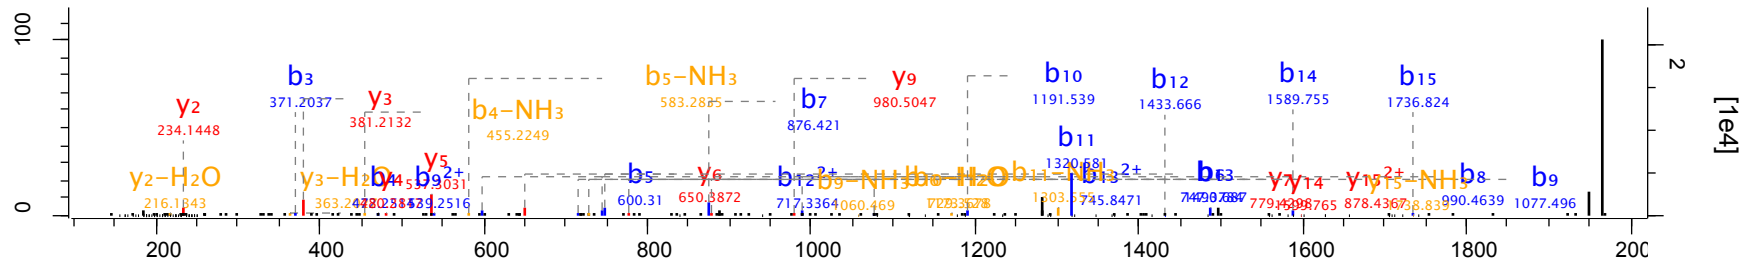

ac

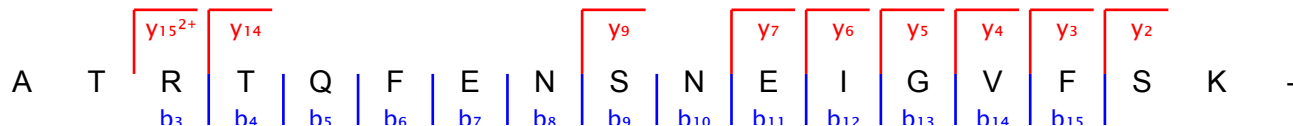

| Raw file                           | Scan  | Method   | Score  | m/z    | Gene names |
|------------------------------------|-------|----------|--------|--------|------------|
| 20150228_yeast1_Top_opt_B1_01_1614 | 37058 | TOF; CID | 124.83 | 466.29 | NTF2       |

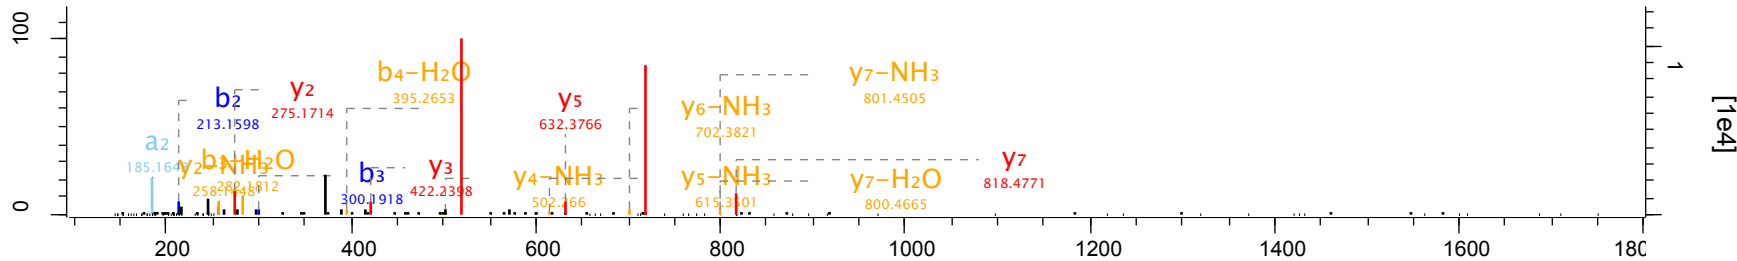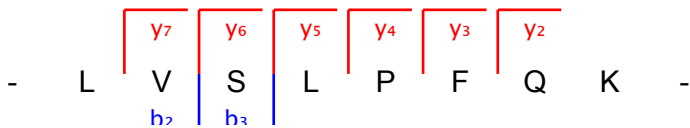

Raw file

Scan

Method

Score

m/z

Gene names

20150228\_yeast1\_Top\_opt\_B1\_01\_1614

37073

TOF; CID

61.96

443.3

YGR127W

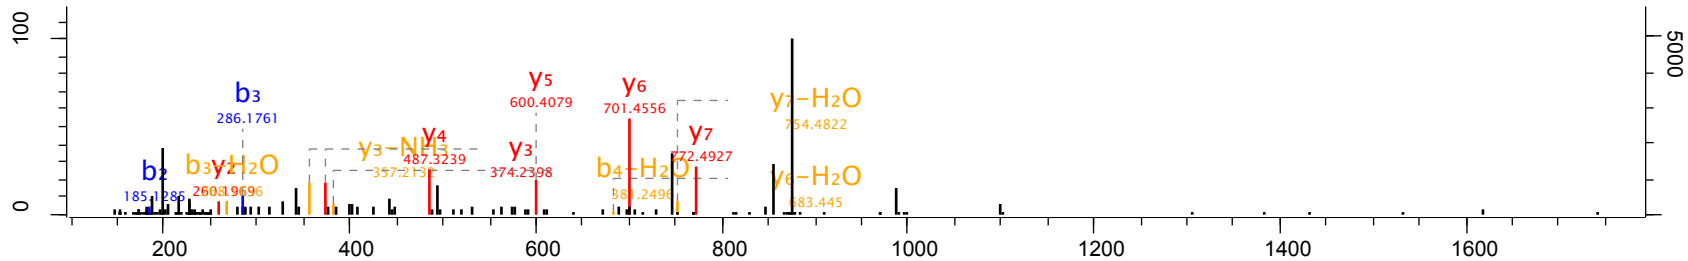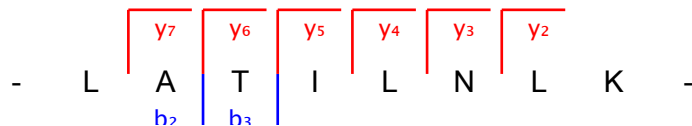

| Raw file                           | Scan  | Method   | Score | m/z    |
|------------------------------------|-------|----------|-------|--------|
| 20150228_yeast1_Top_opt_B1_01_1614 | 37777 | TOF; CID | 91.96 | 666.33 |

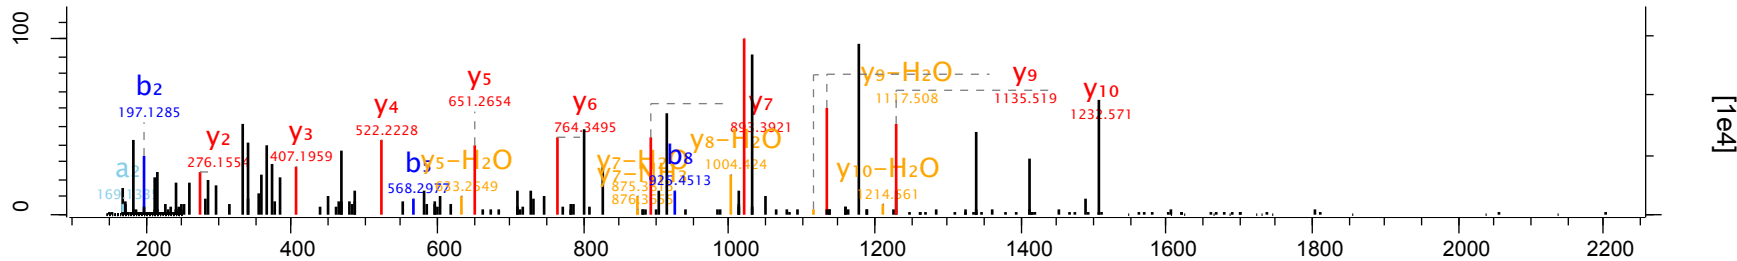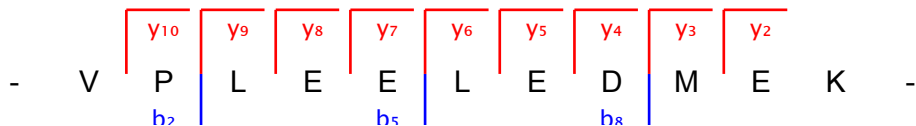



Raw file

Scan

Method

Score

m/z

Gene names

20150228\_yeast1\_Top\_opt\_B1\_01\_1614

37879

TOF; CID

109.15

514.94

MRPL16

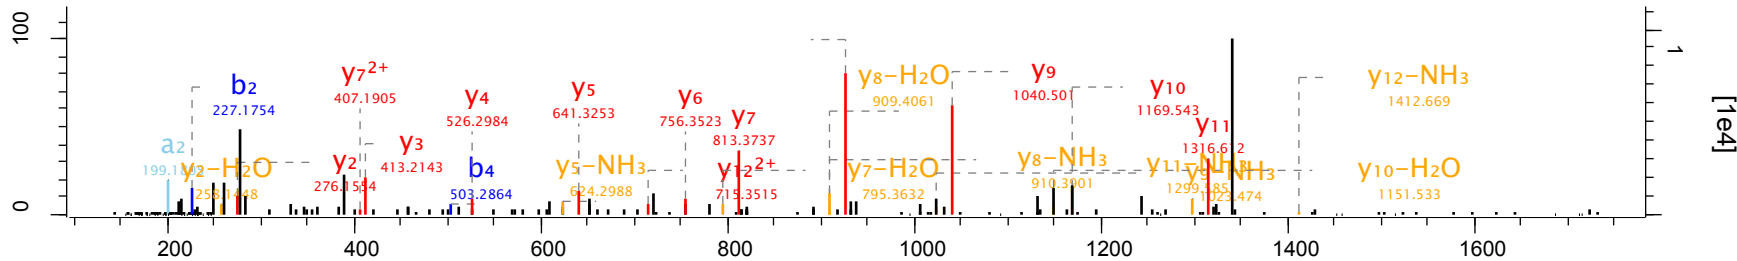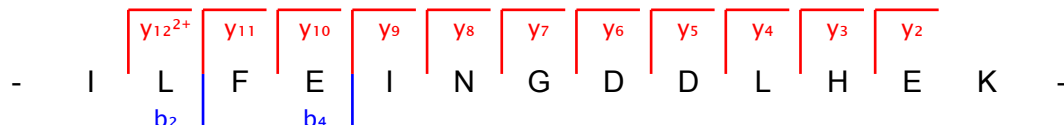

| Raw file                           | Scan  | Method   | Score | m/z    | Gene names |
|------------------------------------|-------|----------|-------|--------|------------|
| 20150228_yeast1_Top_opt_B1_01_1614 | 37979 | TOF; CID | 66    | 648.33 | TFC4       |

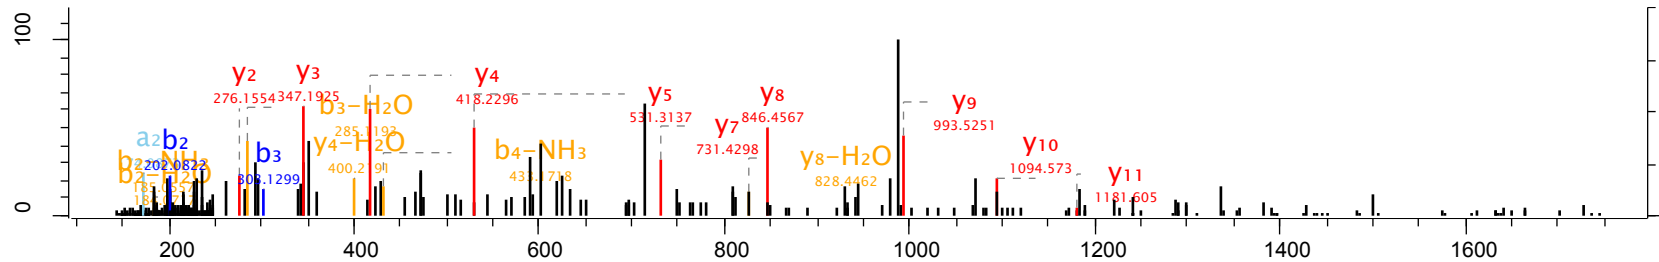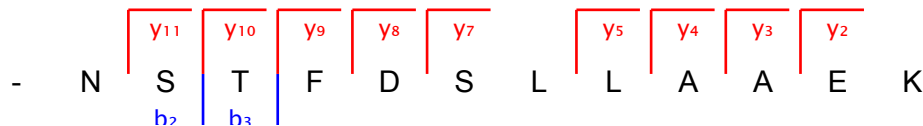

| Raw file                           | Scan  | Method   | Score | m/z    | Gene names |
|------------------------------------|-------|----------|-------|--------|------------|
| 20150228_yeast1_Top_opt_B1_01_1614 | 38199 | TOF; CID | 68    | 675.83 | IBD2       |

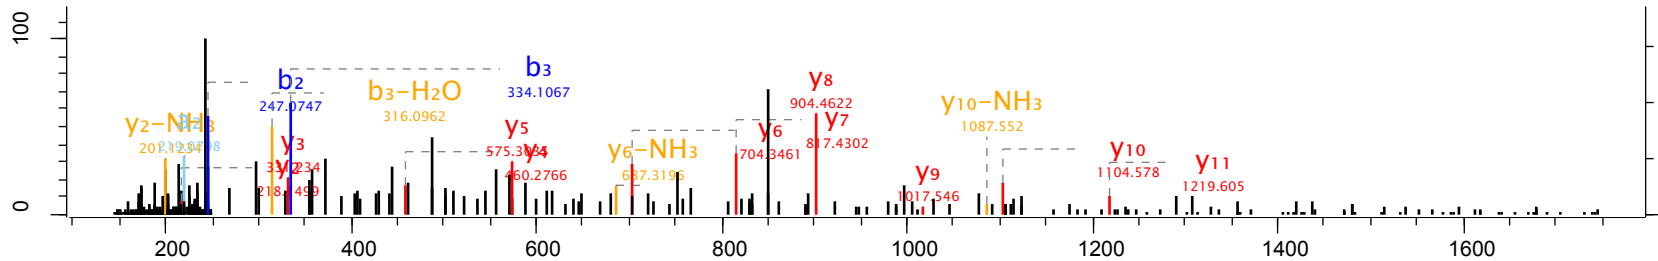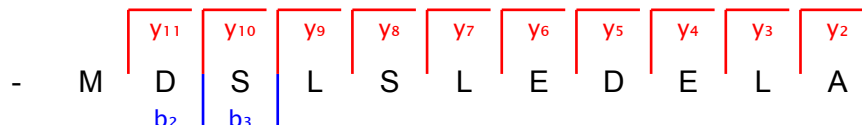

| Raw file                           | Scan  | Method   | Score | m/z    | Gene names |
|------------------------------------|-------|----------|-------|--------|------------|
| 20150228_yeast1_Top_opt_B1_01_1614 | 38578 | TOF; CID | 69.82 | 609.83 | YHP1       |

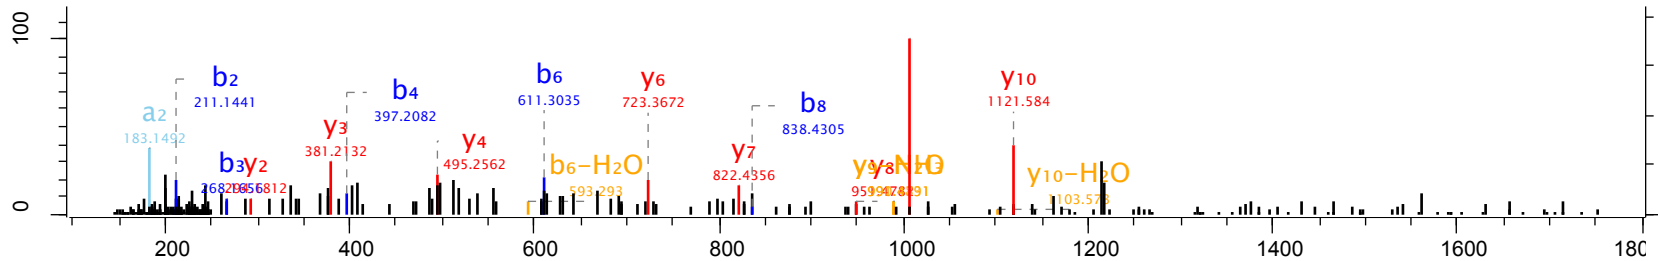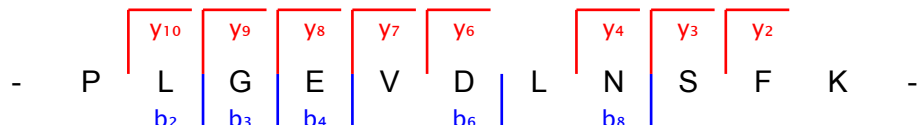

| Raw file                           | Scan  | Method   | Score | m/z    | Gene names |
|------------------------------------|-------|----------|-------|--------|------------|
| 20150228_yeast1_Top_opt_B1_01_1614 | 39516 | TOF; CID | 38.3  | 522.29 | SRB6       |

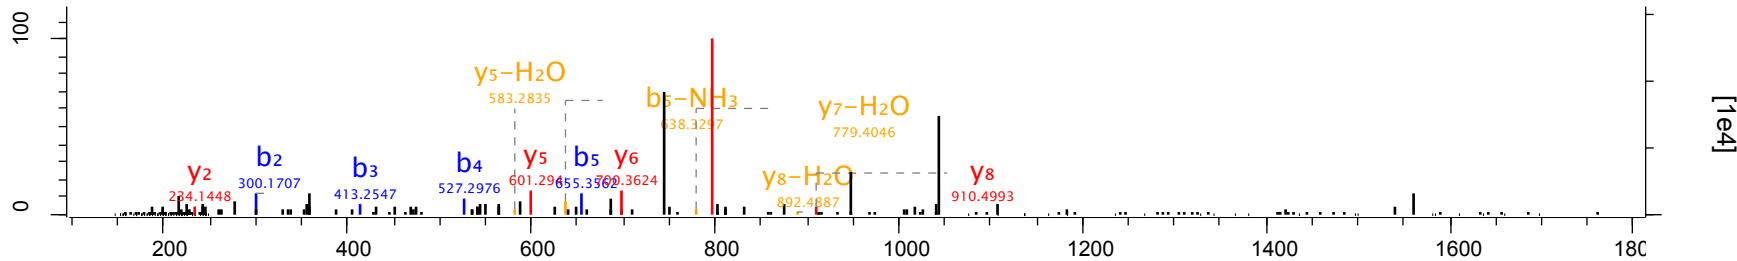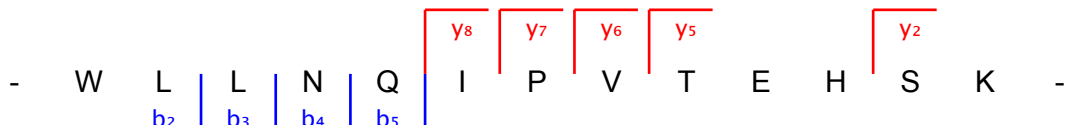

Raw file

20150228\_yeast1\_Top\_opt\_B1\_01\_1614

Scan

39609

Method

TOF; CID

Score

134.91

m/z

933.14

Gene names

ESC8

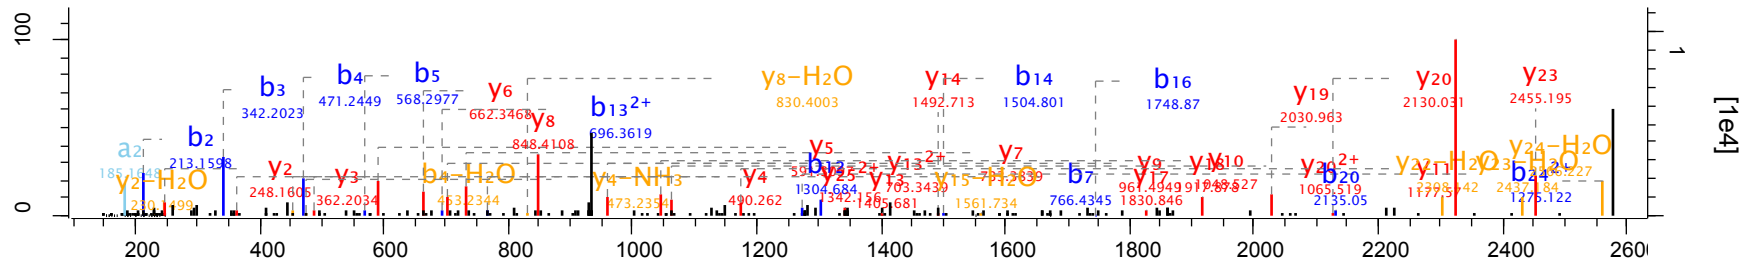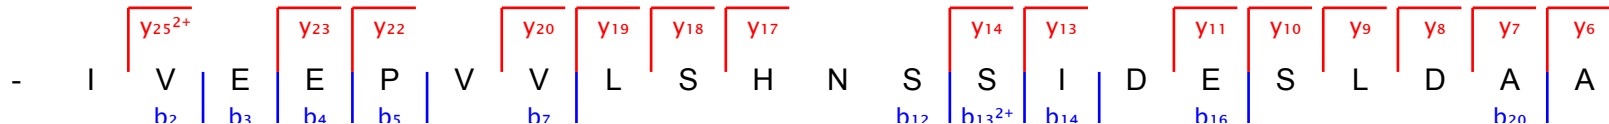

| Raw file                           | Scan  | Method   | Score | m/z    | Gene names |
|------------------------------------|-------|----------|-------|--------|------------|
| 20150228_yeast1_Top_opt_B1_01_1614 | 40364 | TOF; CID | 65.37 | 796.94 | SEF1       |

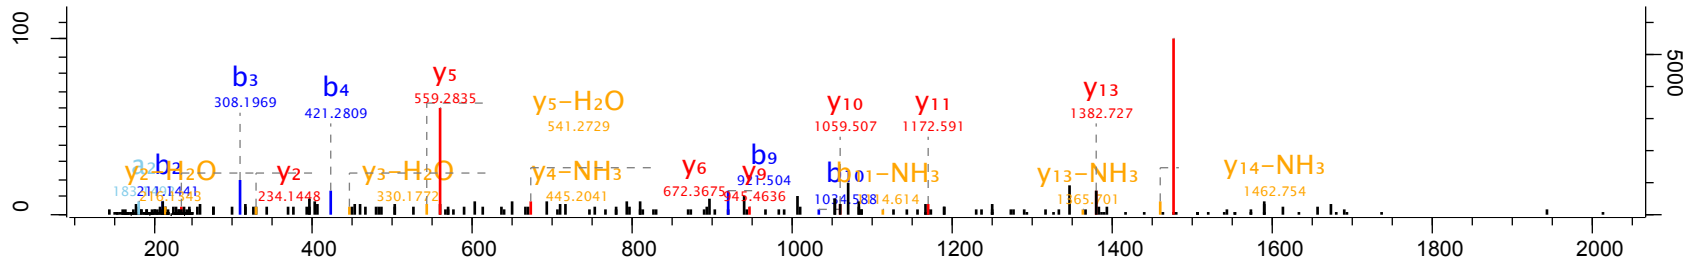

Protein sequence: - L P P L L N D S A L P N N S K -

Fragmentation sites (b and y ions) are indicated by brackets below the sequence:

- b2: L P P L L N D S A L P N N S K -
- b3: L P P L L N D S A L P N N S K -
- b4: L P P L L N D S A L P N N S K -
- b9: L P P L L N D S A L P N N S K -
- b10: L P P L L N D S A L P N N S K -
- y2: L P P L L N D S A L P N N S K -
- y5: L P P L L N D S A L P N N S K -
- y6: L P P L L N D S A L P N N S K -
- y9: L P P L L N D S A L P N N S K -
- y10: L P P L L N D S A L P N N S K -
- y11: L P P L L N D S A L P N N S K -
- y13: L P P L L N D S A L P N N S K -
- y14: L P P L L N D S A L P N N S K -

Raw file

Scan

Method

Score

m/z

Gene names

20150228\_yeast1\_Top\_opt\_B1\_01\_1614

40428

TOF; CID

105.65

767.91

LOT5

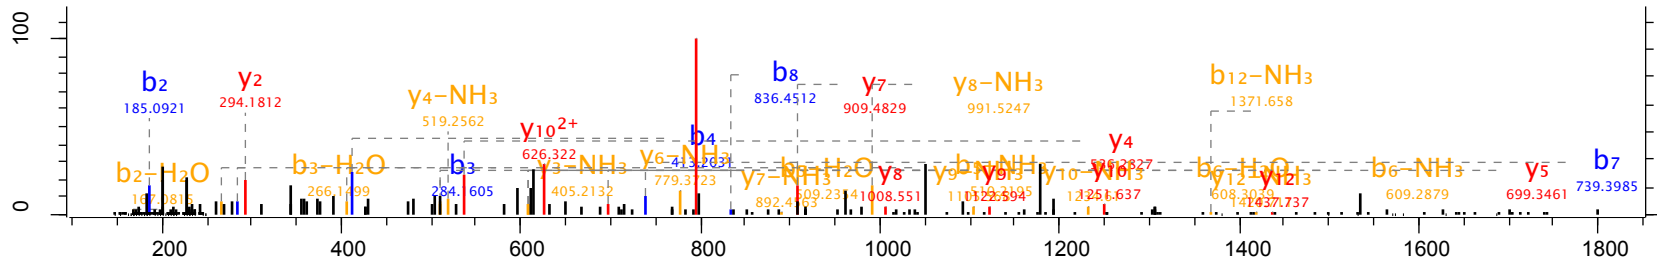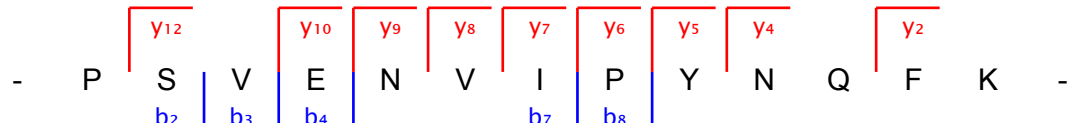



Raw file

Scan

Method

Score

m/z

Gene names

20150228\_yeast1\_Top\_opt\_B1\_01\_1614

40657

TOF; CID

90.48

851.44

RFX1

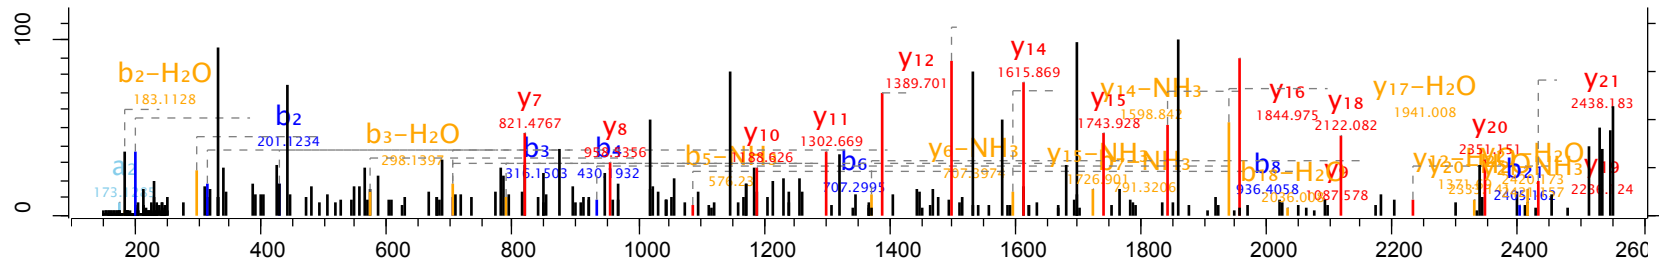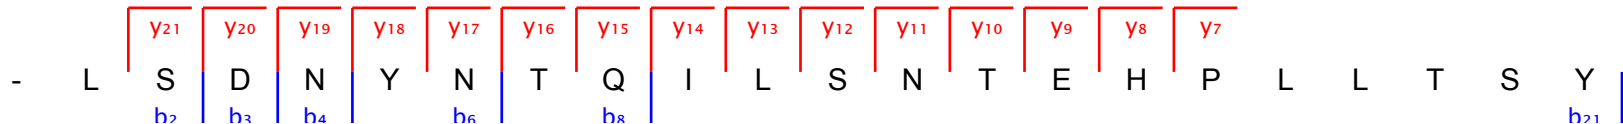

Raw file

20150228\_yeast1\_Top\_opt\_B1\_01\_1614

Scan

41749

Method

TOF; CID

Score

97.8

m/z

582.62

Gene names

RSM19

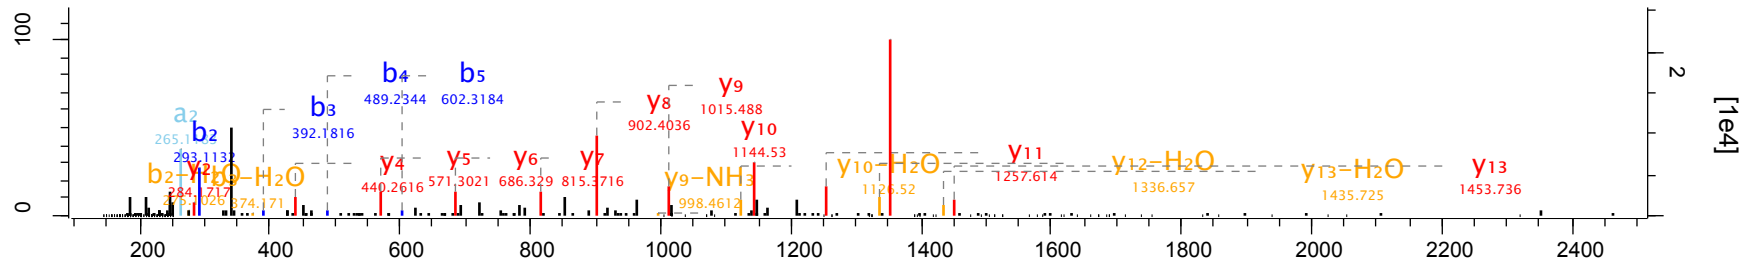

- E Y V P I E I S E D M V G H K -

b<sub>2</sub> b<sub>3</sub> b<sub>4</sub> b<sub>5</sub> y<sub>13</sub> y<sub>12</sub> y<sub>11</sub> y<sub>10</sub> y<sub>9</sub> y<sub>8</sub> y<sub>7</sub> y<sub>6</sub> y<sub>5</sub> y<sub>4</sub> y<sub>2</sub>

| Raw file                           | Scan  | Method   | Score | m/z    | Gene names |
|------------------------------------|-------|----------|-------|--------|------------|
| 20150228_yeast1_Top_opt_B1_01_1614 | 41825 | TOF; CID | 70.03 | 553.81 | ALK1       |

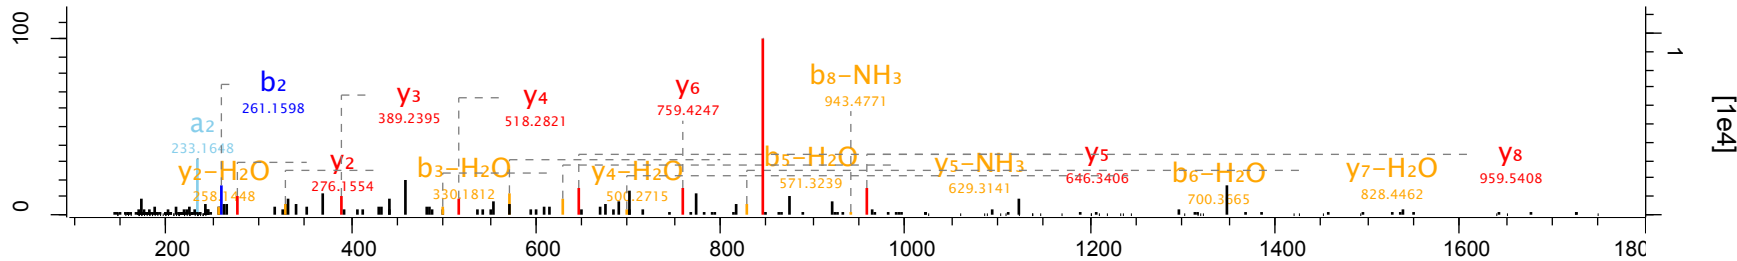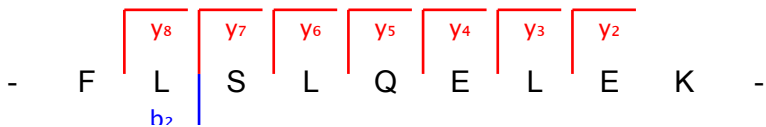

Raw file

Scan

Method

Score

m/z

Gene names

20150228\_yeast1\_Top\_opt\_B1\_01\_1614

41855

TOF; CID

41.54

559.96

BNA7

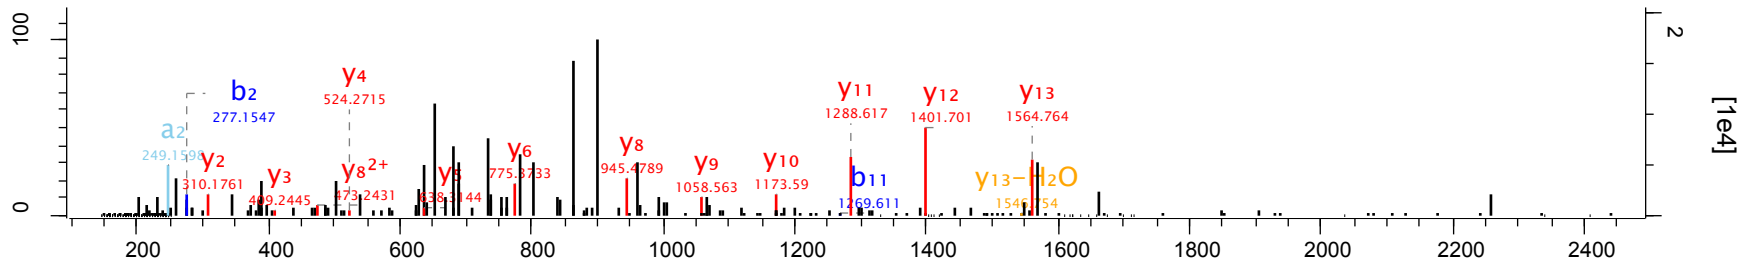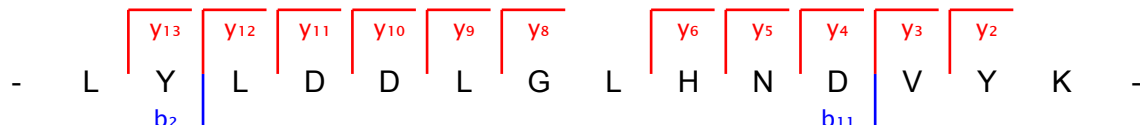

| Raw file                           | Scan  | Method   | Score | m/z    | Gene names |
|------------------------------------|-------|----------|-------|--------|------------|
| 20150228_yeast1_Top_opt_B1_01_1614 | 42111 | TOF; CID | 74.99 | 694.38 | YHR122W    |

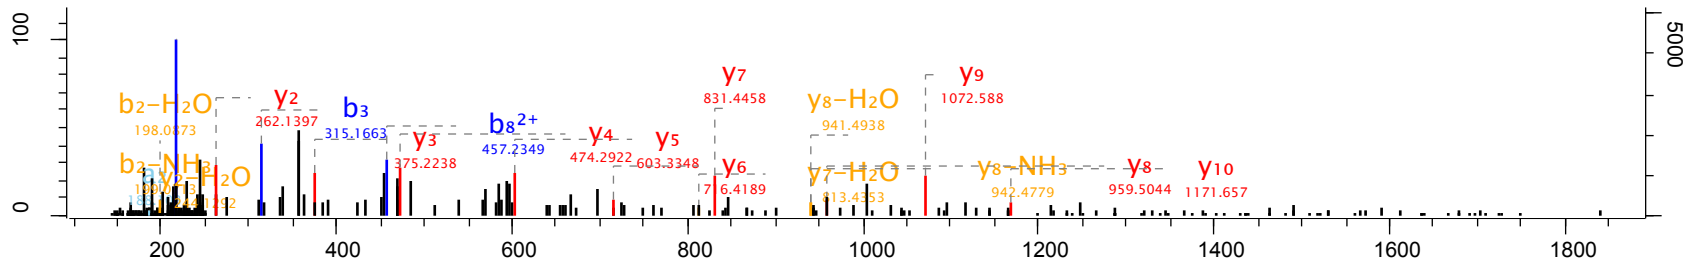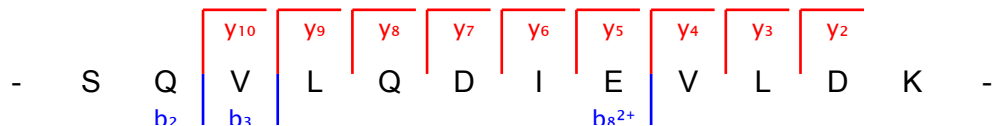

| Raw file                           | Scan  | Method   | Score | m/z    | Gene names |
|------------------------------------|-------|----------|-------|--------|------------|
| 20150228_yeast1_Top_opt_B1_01_1614 | 43246 | TOF; CID | 54.76 | 903.44 | UFO1       |

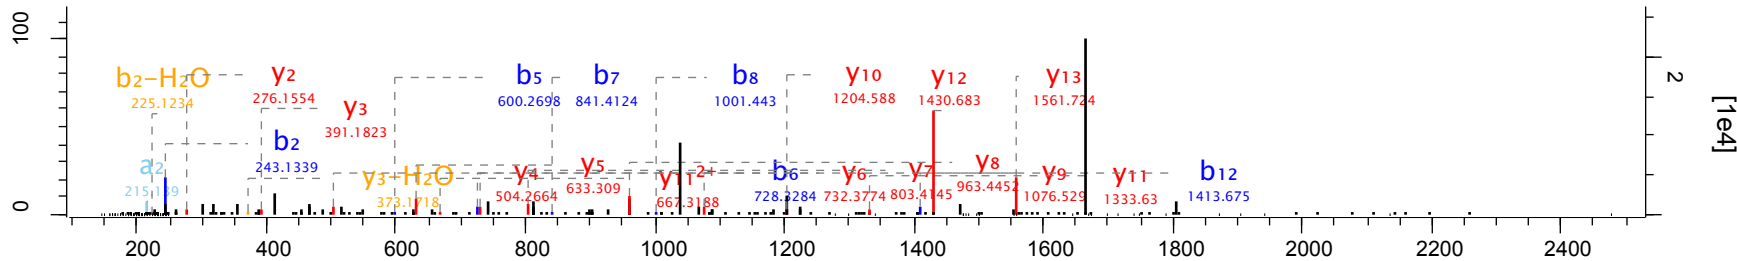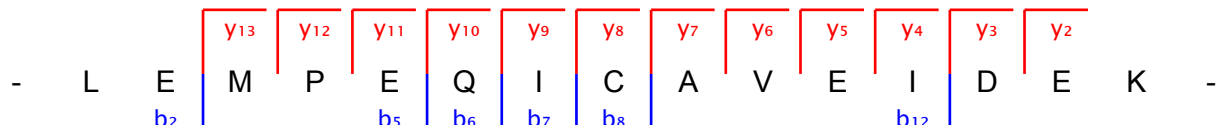

Raw file

Scan

Method

Score

m/z

Gene names

20150228\_yeast1\_Top\_opt\_B1\_01\_1614

43277

TOF; CID

86.9

515.32

SKI6

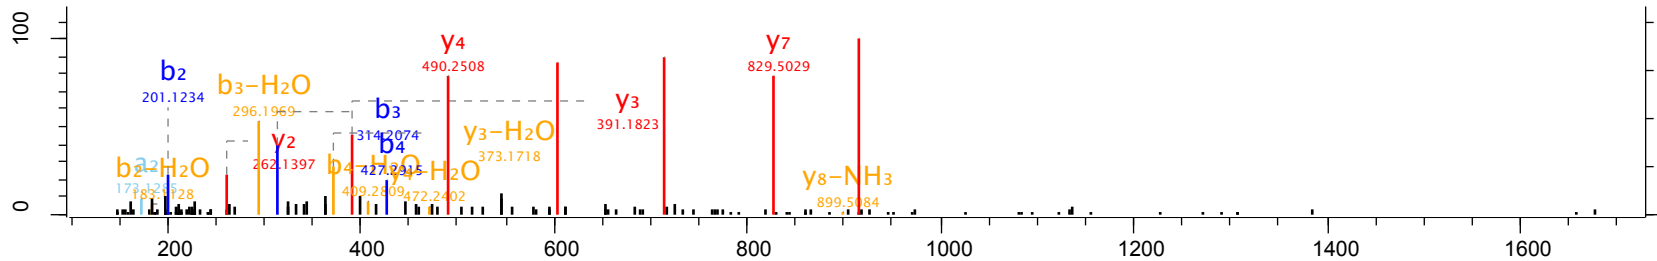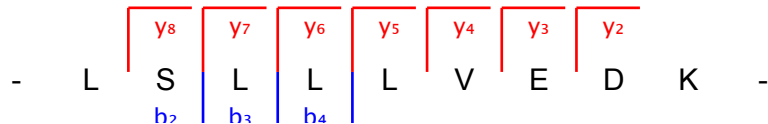

| Raw file                           | Scan  | Method   | Score | m/z   | Gene names |
|------------------------------------|-------|----------|-------|-------|------------|
| 20150228_yeast1_Top_opt_B1_01_1614 | 43511 | TOF; CID | 74.38 | 550.3 | MPA43      |

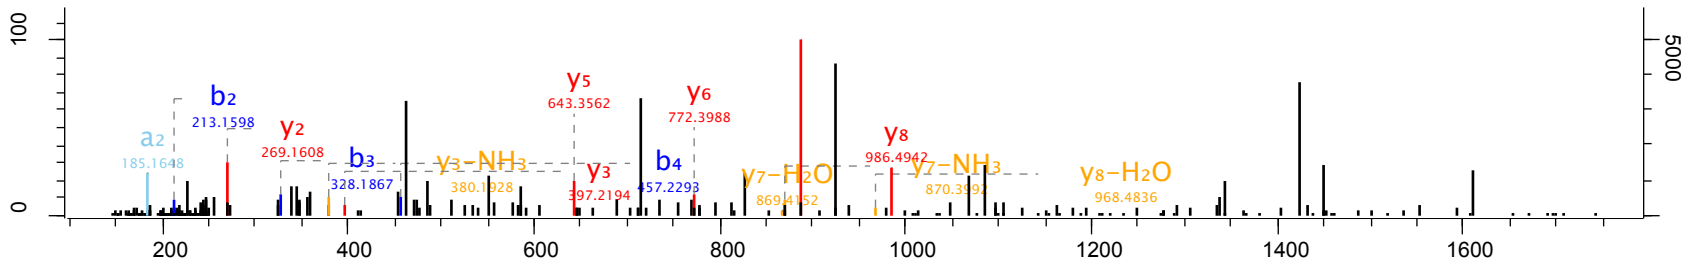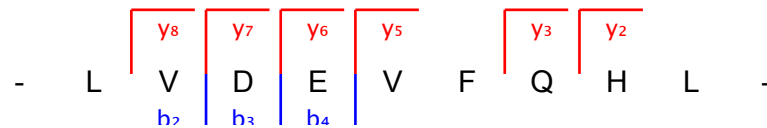



| Raw file                           | Scan  | Method   | Score | m/z    | Gene names |
|------------------------------------|-------|----------|-------|--------|------------|
| 20150228_yeast1_Top_opt_B1_01_1614 | 43808 | TOF; CID | 59.17 | 772.89 | FYV4       |

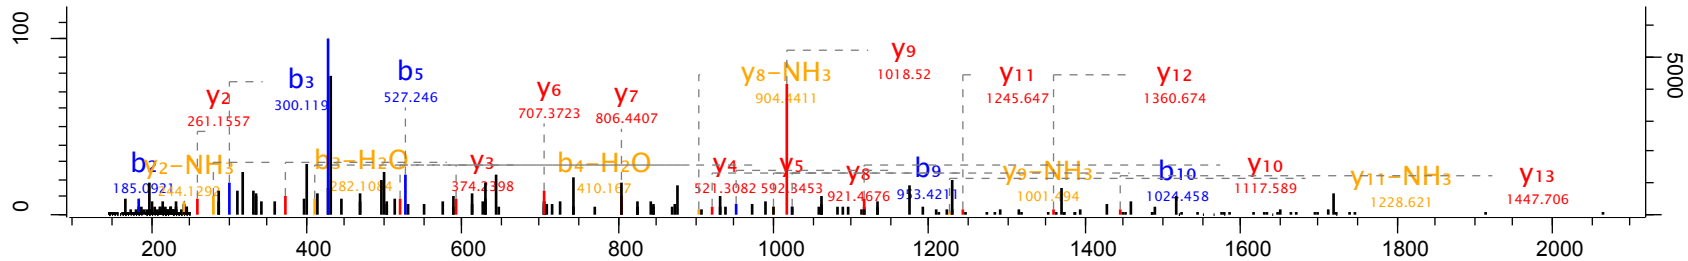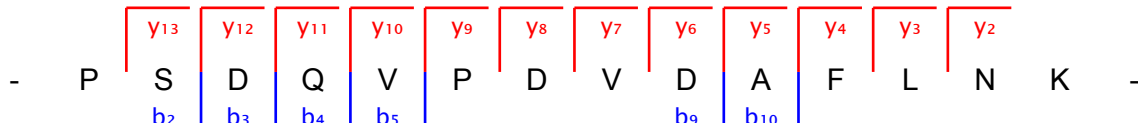

Raw file

20150228\_yeast1\_Top\_opt\_B1\_01\_1614

Scan

44195

Method

TOF; CID

Score

109.44

m/z

568.29

Gene names

LSM1

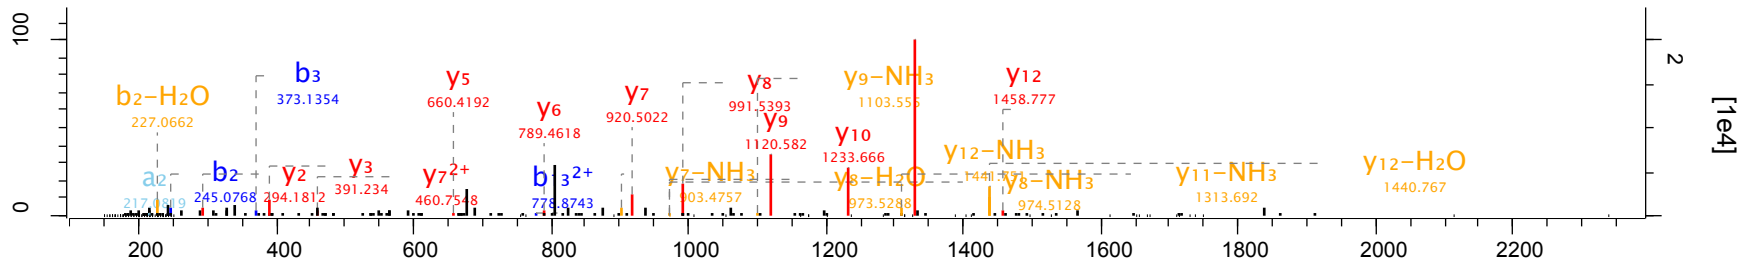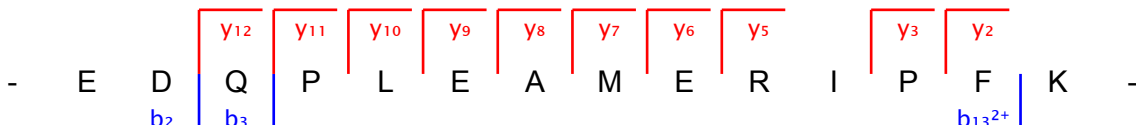

| Raw file                           | Scan  | Method   | Score | m/z    | Gene names |
|------------------------------------|-------|----------|-------|--------|------------|
| 20150228_yeast1_Top_opt_B1_01_1614 | 44588 | TOF; CID | 84.48 | 490.61 | MRP20      |

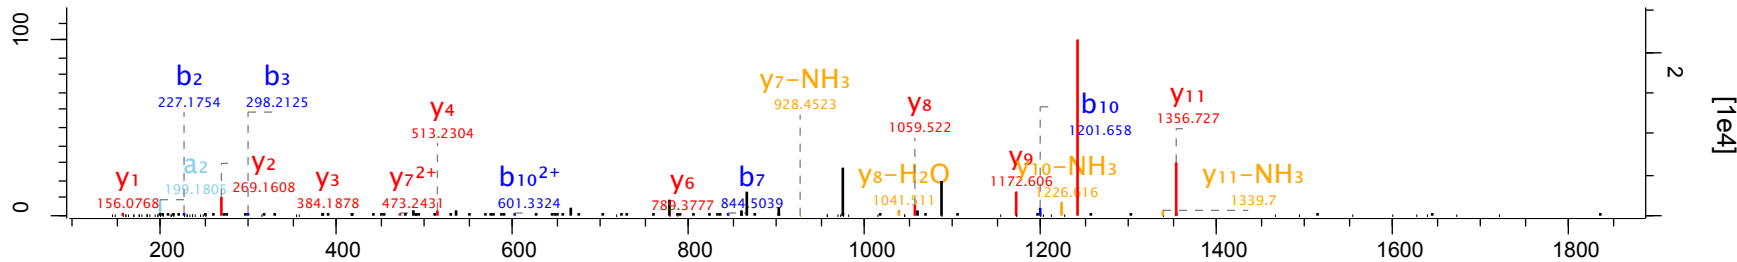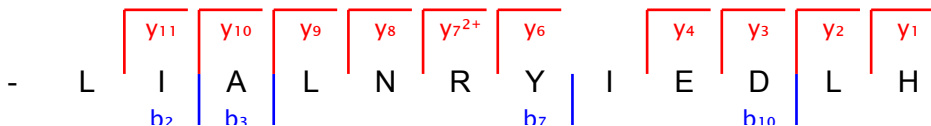

| Raw file                           | Scan  | Method   | Score | m/z    | Gene names |
|------------------------------------|-------|----------|-------|--------|------------|
| 20150228_yeast1_Top_opt_B1_01_1614 | 44953 | TOF; CID | 51.64 | 782.92 | APP1       |

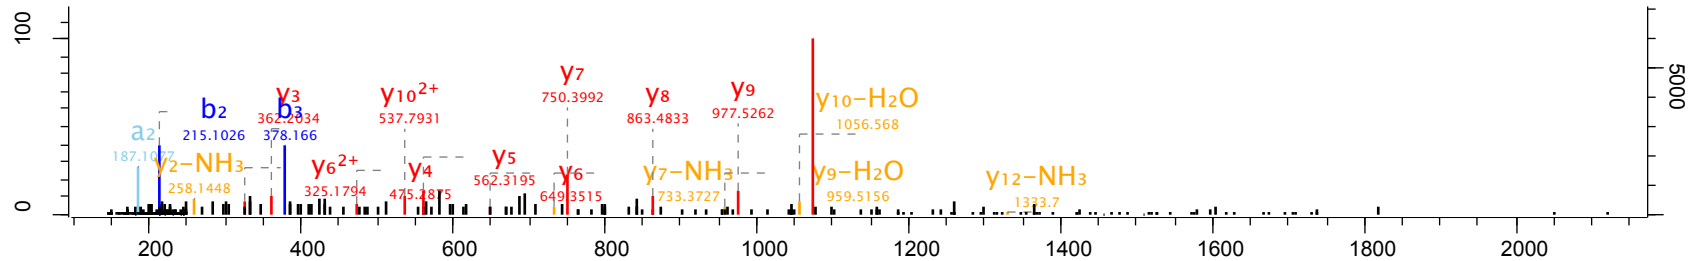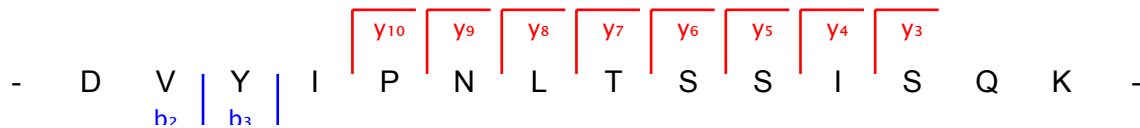

| Raw file                           | Scan  | Method   | Score | m/z    | Gene names |
|------------------------------------|-------|----------|-------|--------|------------|
| 20150228_yeast1_Top_opt_B1_01_1614 | 45396 | TOF; CID | 80.68 | 468.79 | HST1       |

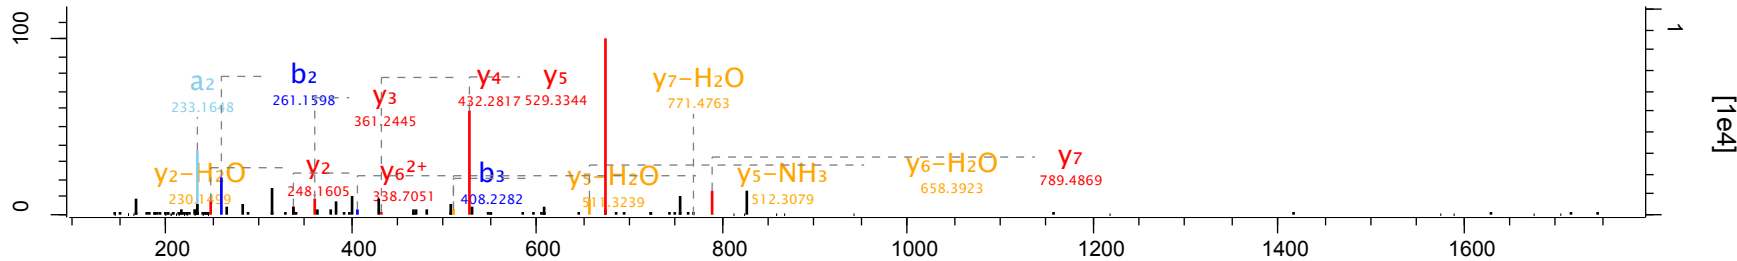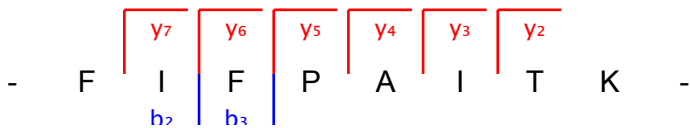

Raw file

Scan

Method

Score

m/z

Gene names

20150228\_yeast1\_Top\_opt\_B1\_01\_1614

46479

TOF; CID

96.02

1287.01

ERV2

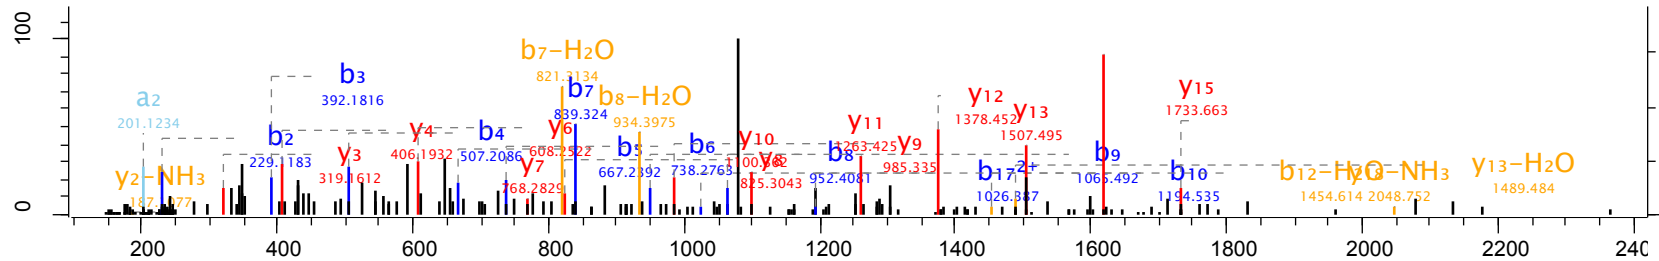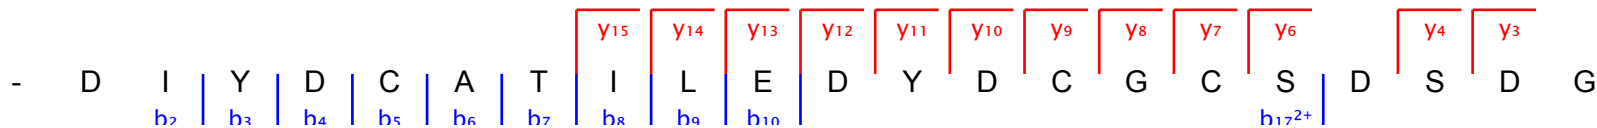

| Raw file                           | Scan  | Method   | Score | m/z    | Gene names |
|------------------------------------|-------|----------|-------|--------|------------|
| 20150228_yeast1_Top_opt_B1_01_1614 | 46513 | TOF; CID | 96.21 | 828.96 | IMG1       |

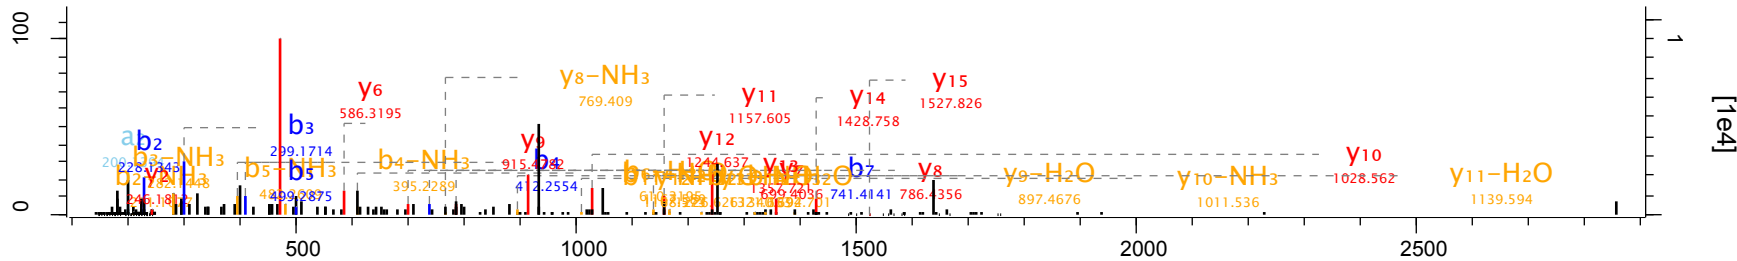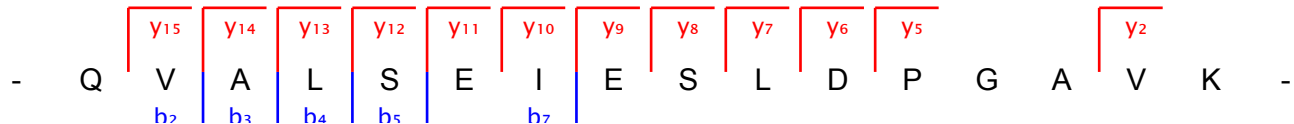

| Raw file                           | Scan  | Method   | Score | m/z    | Gene names |
|------------------------------------|-------|----------|-------|--------|------------|
| 20150228_yeast1_Top_opt_B1_01_1614 | 46636 | TOF; CID | 48.28 | 650.31 | TNA1       |

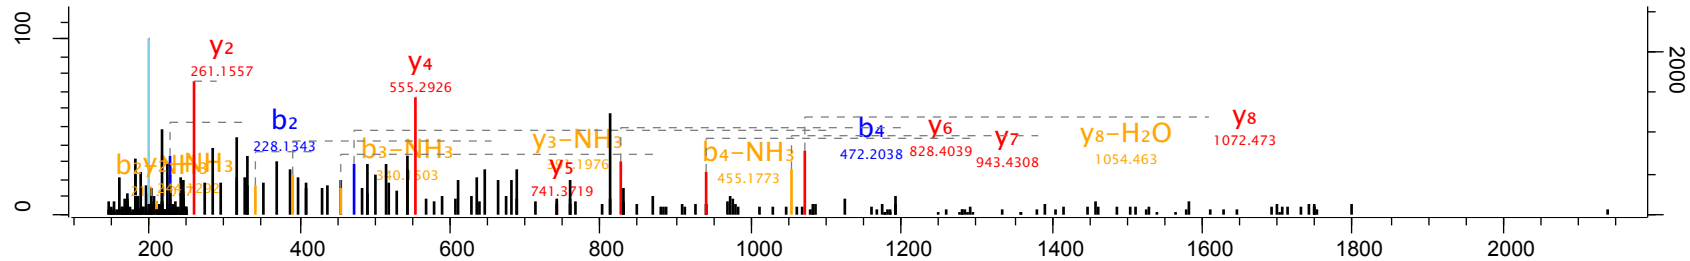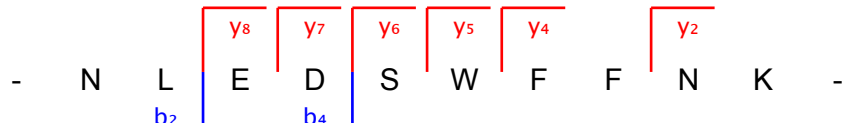



| Raw file                           | Scan  | Method   | Score | m/z    | Gene names |
|------------------------------------|-------|----------|-------|--------|------------|
| 20150228_yeast1_Top_opt_B1_01_1614 | 47871 | TOF; CID | 94.69 | 540.81 | RHO1       |

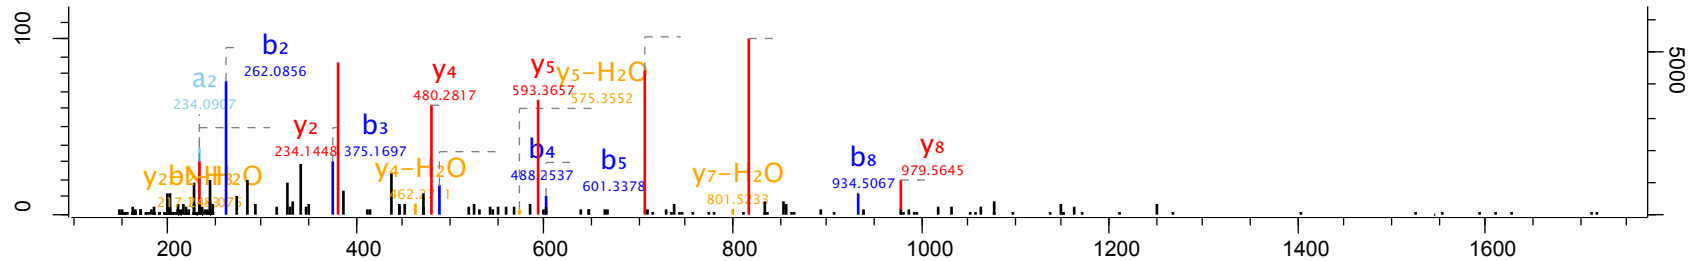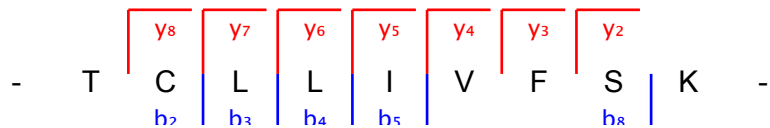

| Raw file                           | Scan  | Method   | Score | m/z    | Gene names |
|------------------------------------|-------|----------|-------|--------|------------|
| 20150228_yeast1_Top_opt_B1_01_1614 | 49122 | TOF; CID | 56.14 | 697.86 | SPC97      |

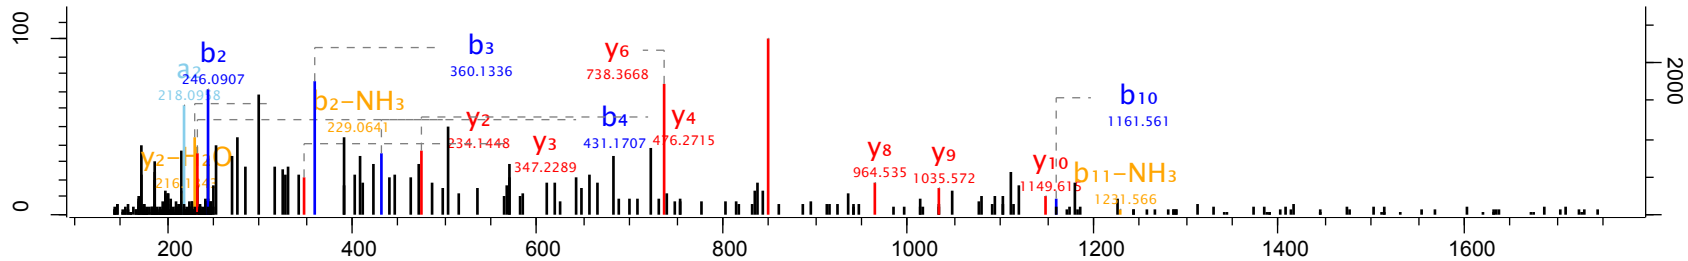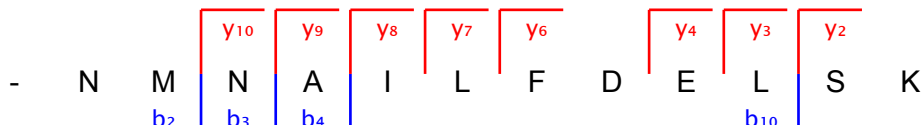

Raw file

20150228\_yeast1\_Top\_opt\_B1\_01\_1614

Scan

49389

Method

TOF; CID

Score

59.2

m/z

632.83

Gene names

YOR020W-A

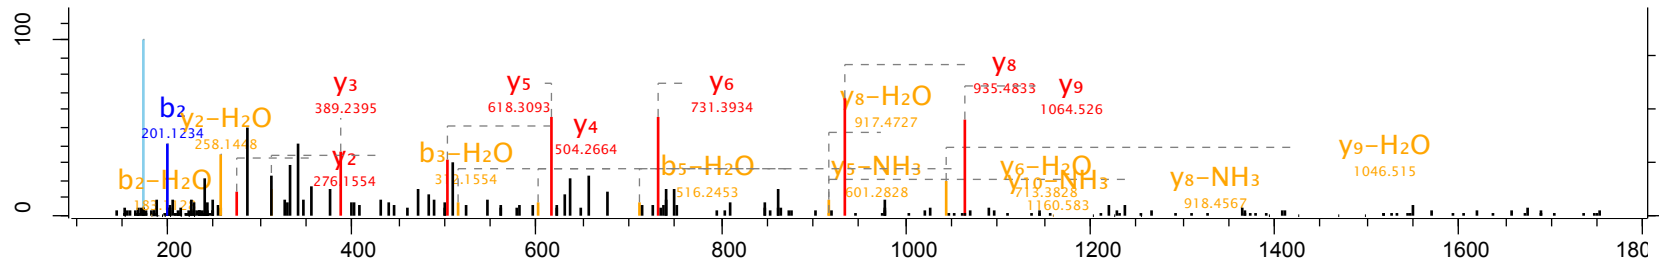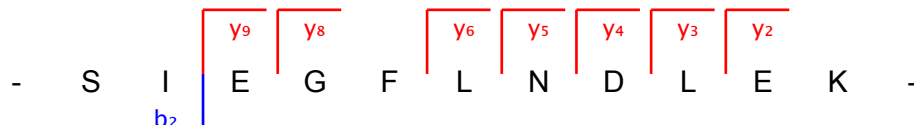

Raw file

Scan

Method

Score

m/z

Gene names

20150228\_yeast1\_Top\_opt\_B1\_01\_1614

49468

TOF; CID

87.09

1033.14

UMP1

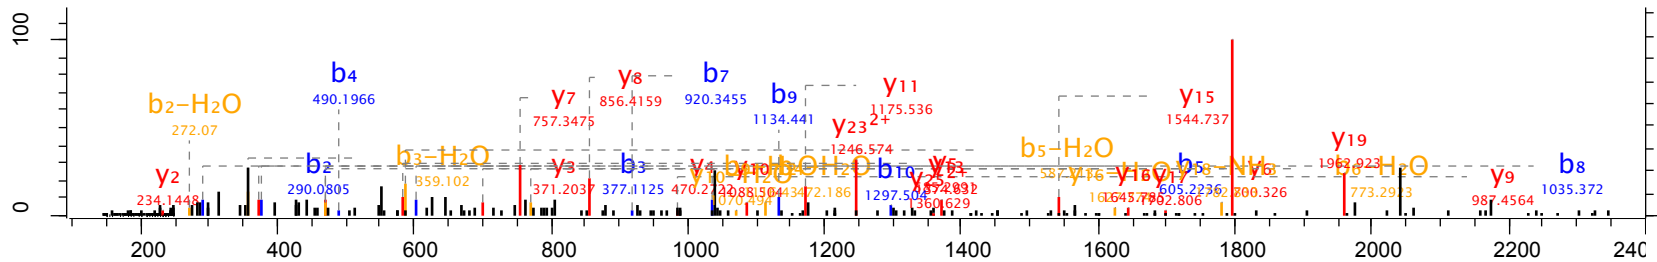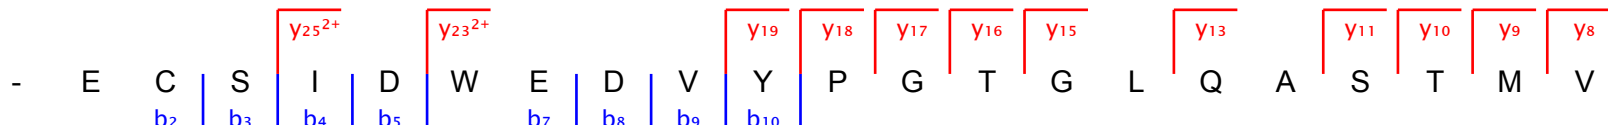

| Raw file                           | Scan  | Method   | Score | m/z     | Gene names |
|------------------------------------|-------|----------|-------|---------|------------|
| 20150228_yeast1_Top_opt_B1_01_1614 | 50357 | TOF; CID | 197.4 | 1369.17 | DAD1       |

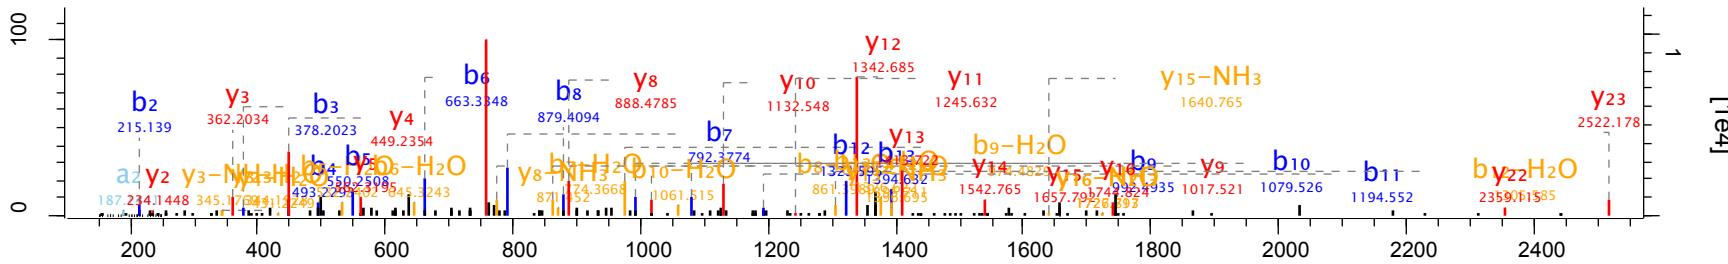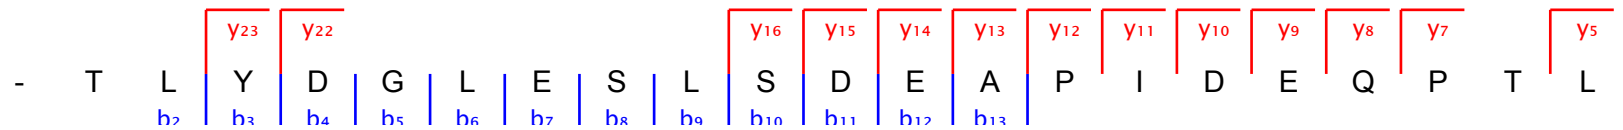

Raw file

Scan

Method

Score

m/z

Gene names

20150228\_yeast1\_Top\_opt\_B1\_01\_1614

50451

TOF; CID

177.12

1212.05

ILM1

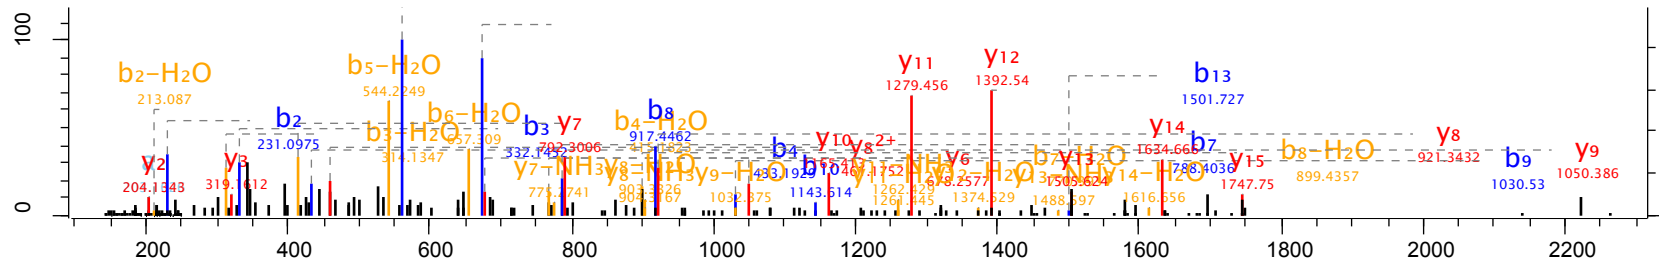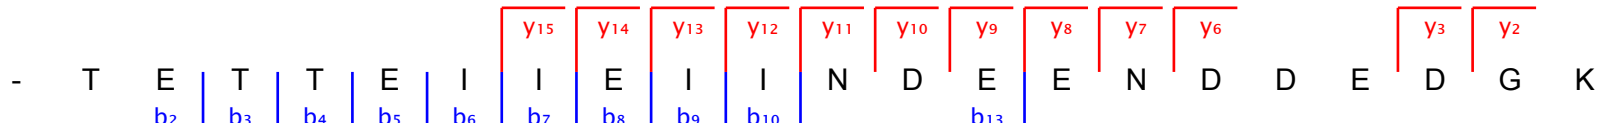

Raw file

20150228\_yeast1\_Top\_opt\_B1\_01\_1614

Scan

50479

Method

TOF; CID

Score

101.78

m/z

925.46

Gene names

SLY41

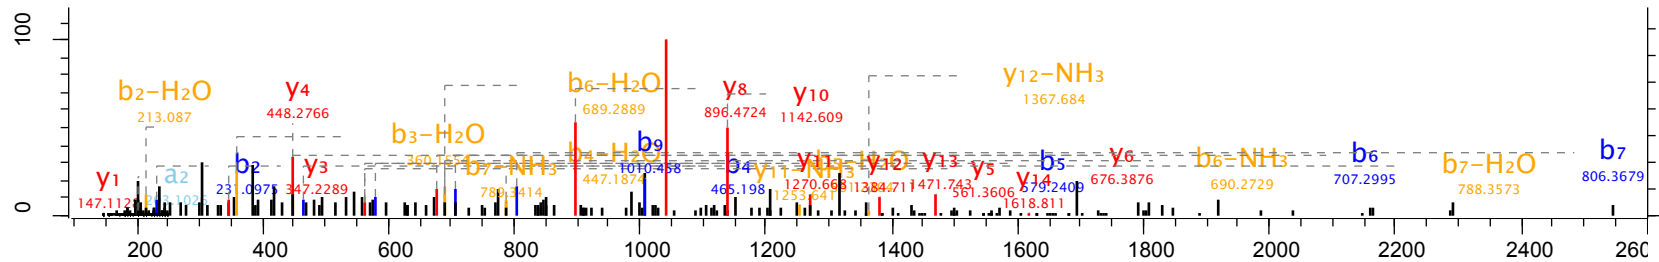

- E T F S N Q V F G Y D I T S L K -

h<sub>2</sub> h<sub>4</sub> h<sub>5</sub> h<sub>6</sub> h<sub>7</sub> h<sub>9</sub>

y<sub>14</sub> y<sub>13</sub> y<sub>12</sub> y<sub>11</sub> y<sub>10</sub> y<sub>9</sub> y<sub>8</sub> y<sub>6</sub> y<sub>5</sub> y<sub>4</sub> y<sub>3</sub> y<sub>1</sub>

| Raw file                           | Scan  | Method   | Score | m/z    | Gene names |
|------------------------------------|-------|----------|-------|--------|------------|
| 20150228_yeast1_Top_opt_B1_01_1614 | 50804 | TOF; CID | 49.27 | 713.64 | MDM10      |

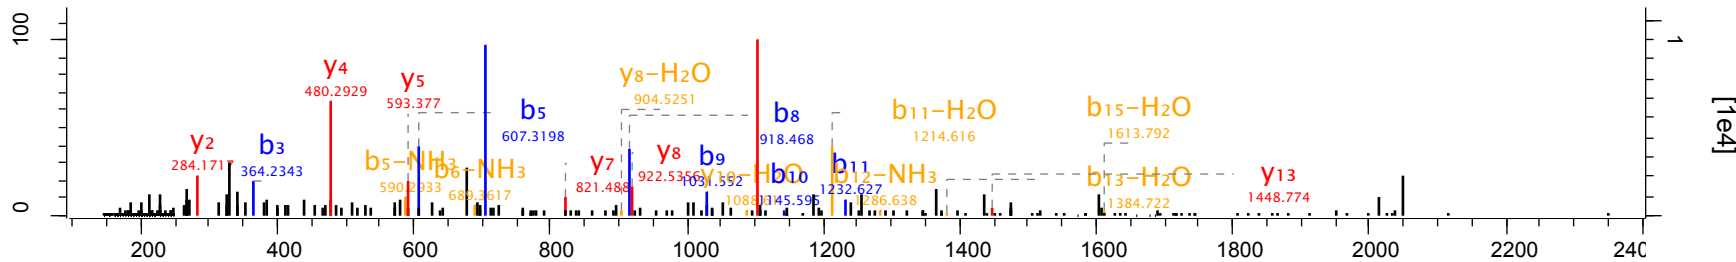

- L L H | E N | V | P D | L | N | S | A V N D I P S T | L D

*(Fragmentation sites are indicated by vertical lines between amino acids)*

*(Fragmentation labels below the sequence: b3 under H, b5 under N, b6 under V, b8 under D, b9 under L, b10 under N, b11 under S; y13 under N, y10 under P, y8 under T, y7 under L)*



Raw file

20150228\_yeast1\_Top\_opt\_B1\_01\_1614

Scan

51034

Method

TOF; CID

Score

67.58

m/z

808.41

Gene names

PPM1

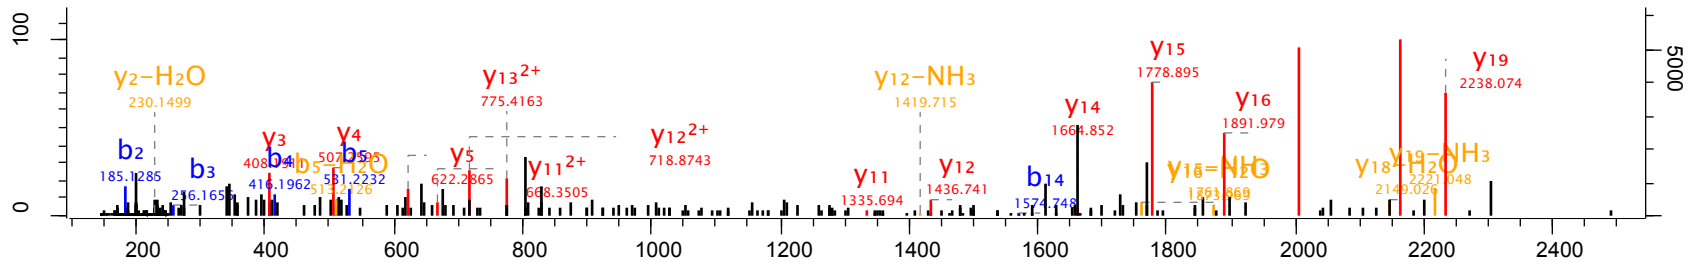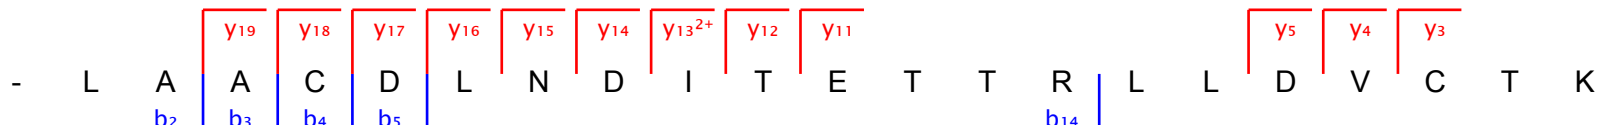

| Raw file                           | Scan  | Method   | Score | m/z    | Gene names |
|------------------------------------|-------|----------|-------|--------|------------|
| 20150228_yeast1_Top_opt_B1_01_1614 | 51382 | TOF; CID | 76.23 | 536.85 | POC4       |

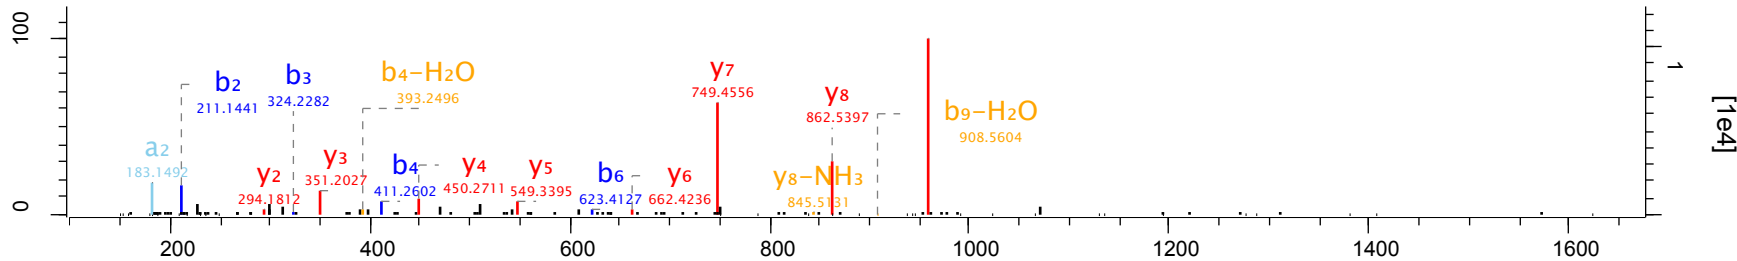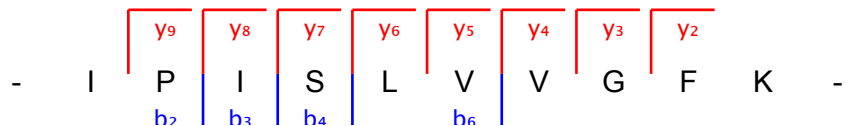

| Raw file                           | Scan  | Method   | Score | m/z    | Gene names |
|------------------------------------|-------|----------|-------|--------|------------|
| 20150228_yeast1_Top_opt_B1_01_1614 | 52265 | TOF; CID | 61.96 | 539.77 | COX2       |

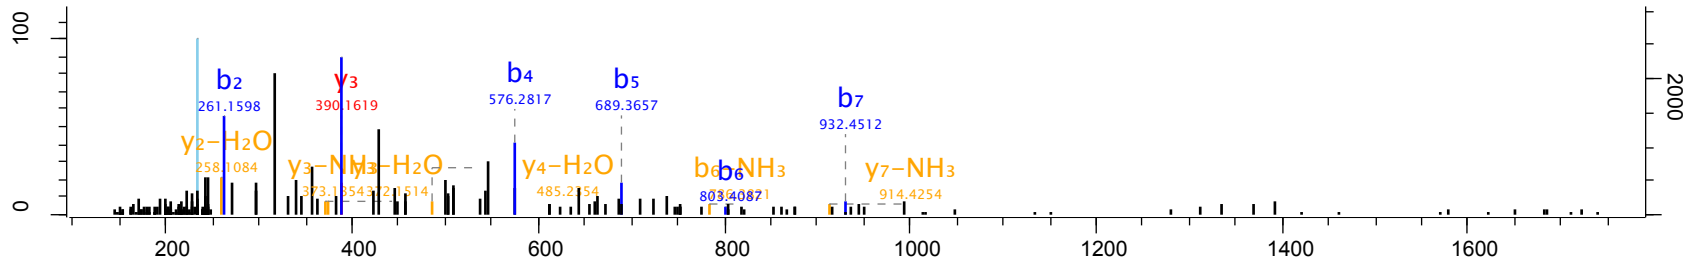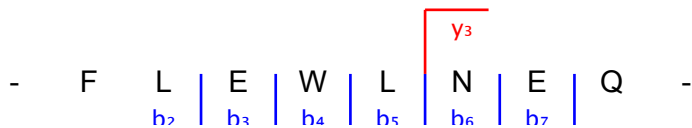

Raw file

Scan

Method

Score

m/z

Gene names

20150228\_yeast1\_Top\_opt\_B1\_01\_1614

53398

TOF; CID

64.27

945.49

UBP16

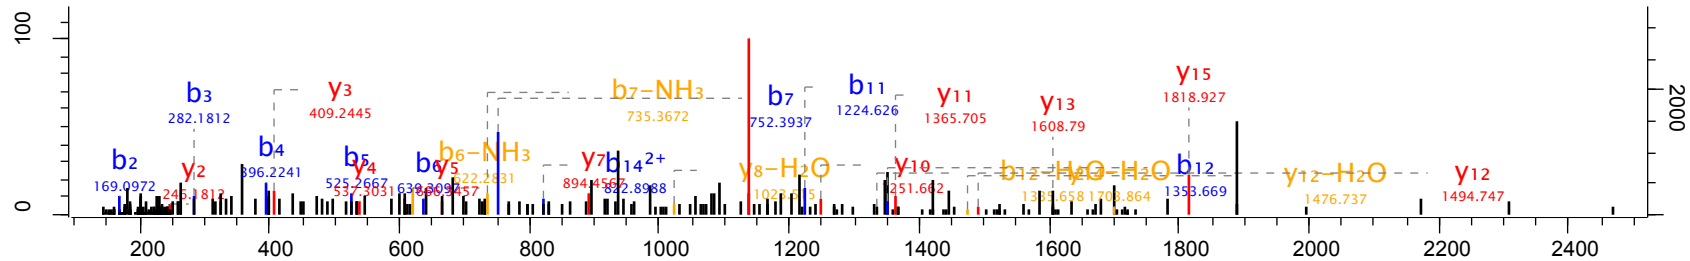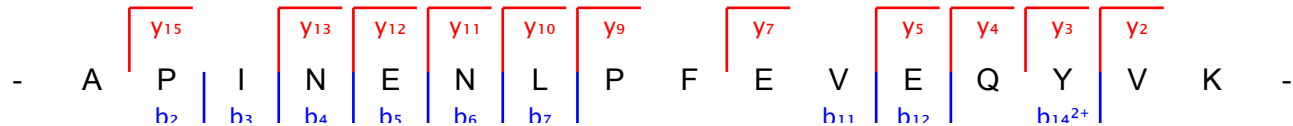

| Raw file                           | Scan  | Method   | Score | m/z    | Gene names |
|------------------------------------|-------|----------|-------|--------|------------|
| 20150228_yeast1_Top_opt_B1_01_1614 | 53552 | TOF; CID | 81.16 | 611.69 | VMA11      |

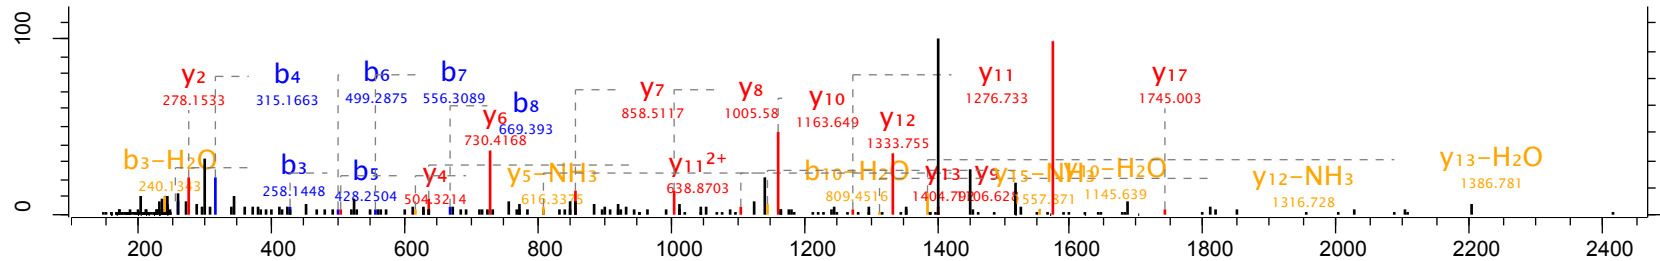

- S G I G I A G I G T F K P E L I M K -

┌ y17 └ ┌ y15 └ ┌ y13 └ ┌ y12 └ ┌ y11 └ ┌ y10 └ ┌ y9 └ ┌ y8 └ ┌ y7 └ ┌ y6 └ ┌ y4 └

┌ b3 └ ┌ b4 └ ┌ b5 └ ┌ b6 └ ┌ b7 └ ┌ b8 └

| Raw file                           | Scan  | Method   | Score | m/z    | Gene names |
|------------------------------------|-------|----------|-------|--------|------------|
| 20150228_yeast1_Top_opt_B1_01_1614 | 54587 | TOF; CID | 72.93 | 522.33 | SMD3       |

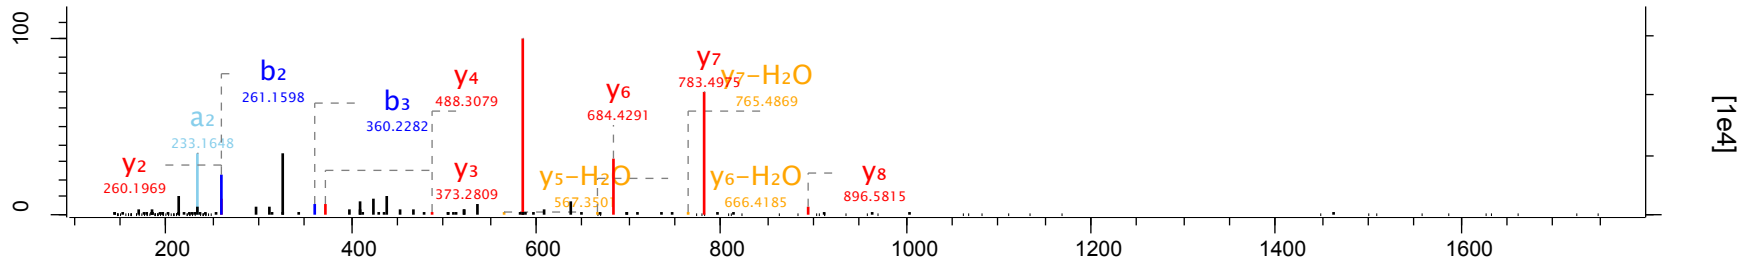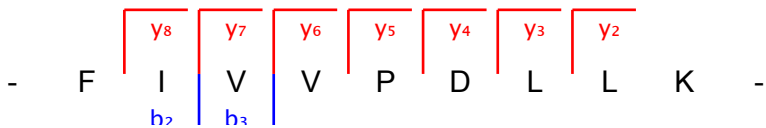

Raw file

Scan

Method

Score

m/z

Gene names

20150228\_yeast1\_Top\_opt\_B1\_01\_1614

54693

TOF; CID

40.43

669.36

VMA3

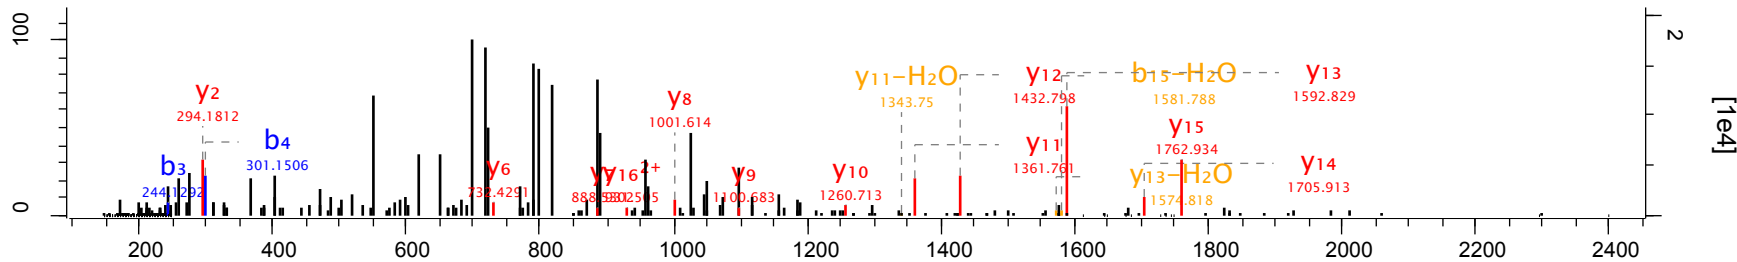

- S G V G I C A T C V L R P D L L F K -

y16<sup>2+</sup> y15 y14 y13 y12 y11 y10 y9 y8 y7 y6 y2  
b3 b4

Raw file

20150228\_yeast1\_Top\_opt\_B1\_01\_1614

Scan

55817

Method

TOF; CID

Score

91.66

m/z

627.98

Gene names

VPS68

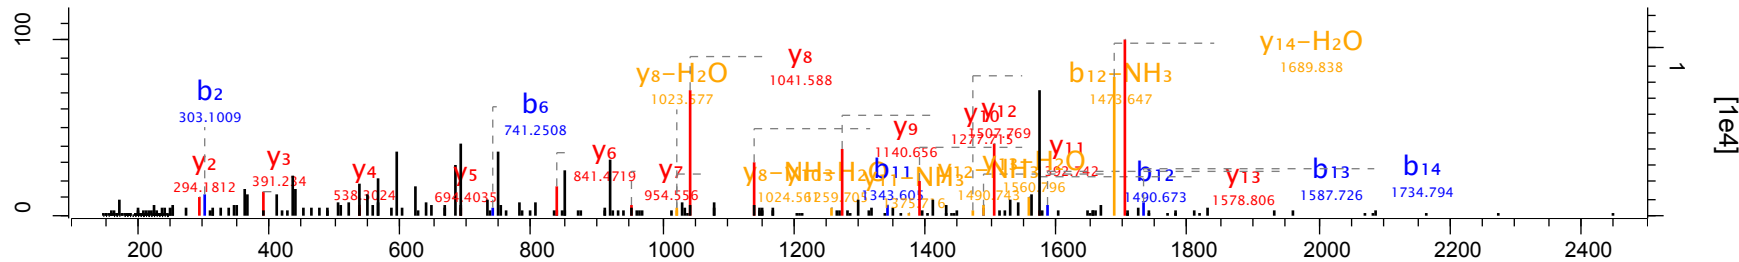

ac

- M E A D D H V S L F R F P F K -  
 b<sub>2</sub> b<sub>6</sub> b<sub>11</sub> b<sub>12</sub> b<sub>13</sub> b<sub>14</sub>  
 y<sub>14</sub> y<sub>13</sub> y<sub>12</sub> y<sub>11</sub> y<sub>10</sub> y<sub>9</sub> y<sub>8</sub> y<sub>7</sub> y<sub>6</sub> y<sub>5</sub> y<sub>4</sub> y<sub>3</sub> y<sub>2</sub>



Raw file

Scan

Method

Score

m/z

Gene names

20150228\_yeast1\_Top\_opt\_B1\_01\_1614

56138

TOF; CID

124.07

735.39

TOM7

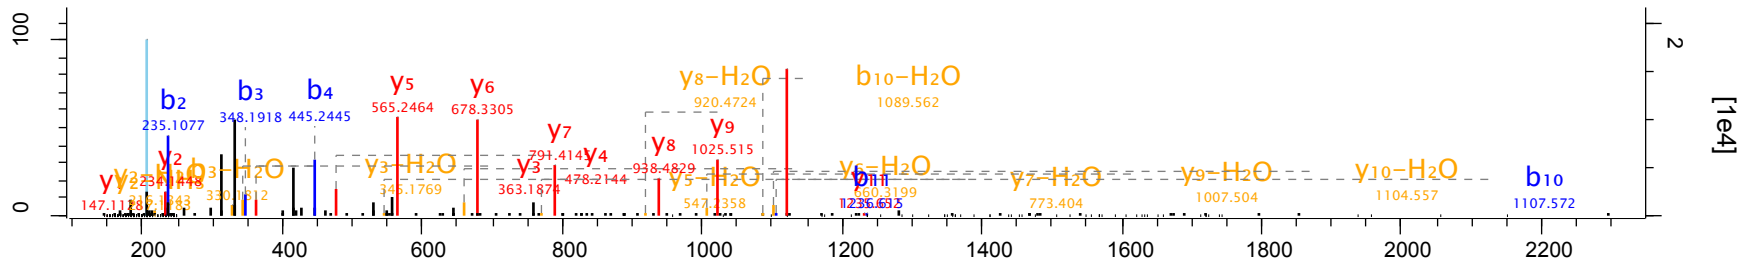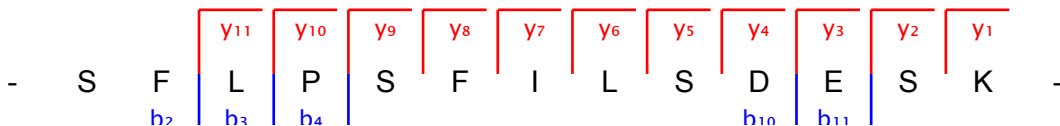

| Raw file                           | Scan  | Method   | Score | m/z    | Gene names |
|------------------------------------|-------|----------|-------|--------|------------|
| 20150228_yeast1_Top_opt_B1_01_1614 | 56439 | TOF; CID | 87.82 | 840.94 | CBP2       |

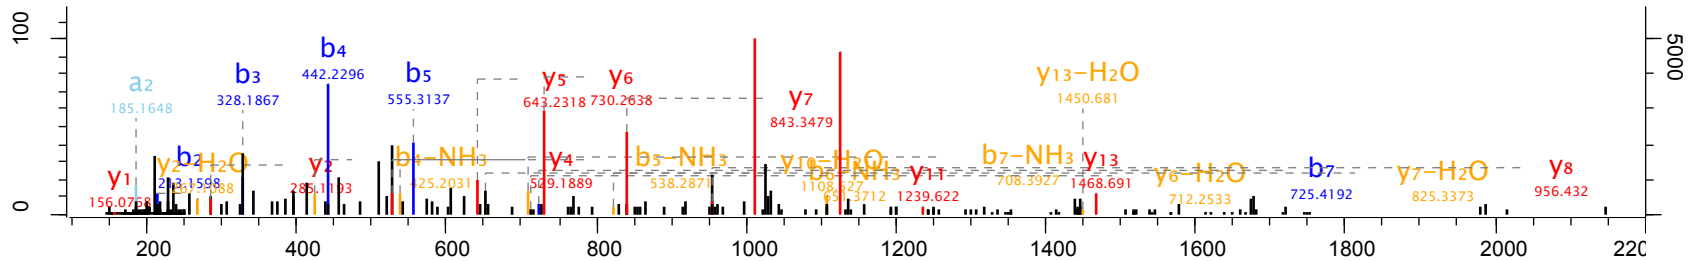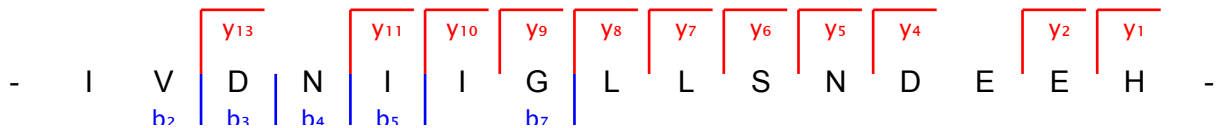

Raw file

20150228\_yeast1\_Top\_opt\_B1\_01\_1614

Scan

57267

Method

TOF; CID

Score

49.04

m/z

1032.52

Gene names

ADK2

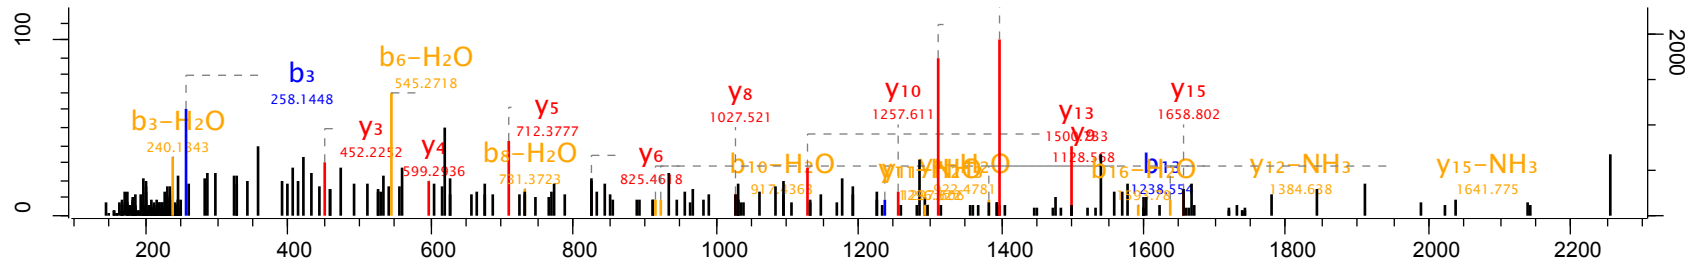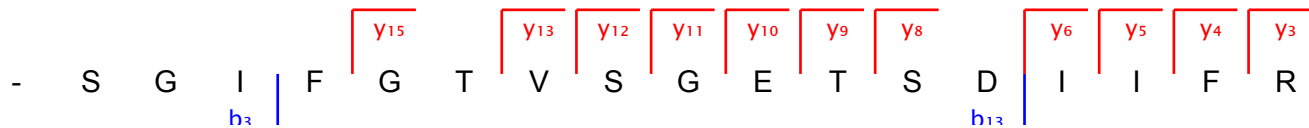

Raw file

Scan

Method

Score

m/z

Gene names

20150228\_yeast1\_Top\_opt\_B1\_01\_1614

57456

TOF; CID

50.35

659.37

MIC10

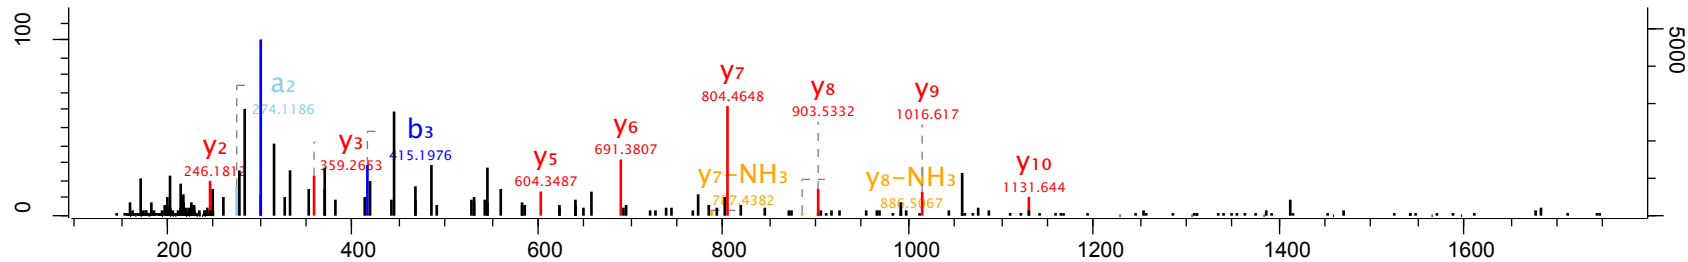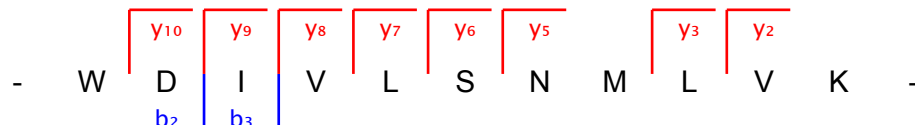

Raw file

20150228\_yeast1\_Top\_opt\_B1\_01\_1614

Scan

57695

Method

TOF; CID

Score

128.35

m/z

592.84

Gene names

APT2

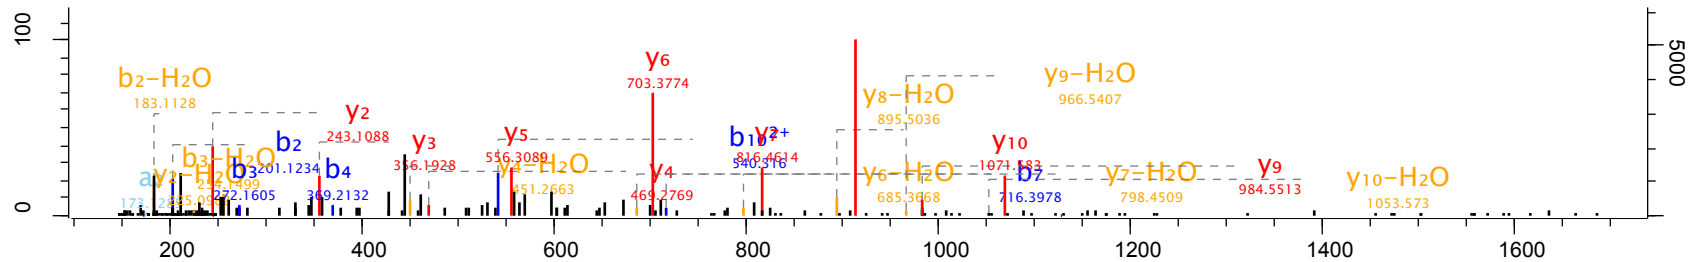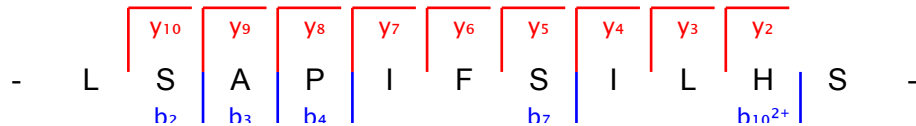

| Raw file                           | Scan  | Method   | Score | m/z     | Gene names |
|------------------------------------|-------|----------|-------|---------|------------|
| 20150228_yeast1_Top_opt_B1_01_1614 | 58056 | TOF; CID | 52.87 | 1078.07 | CPD1       |

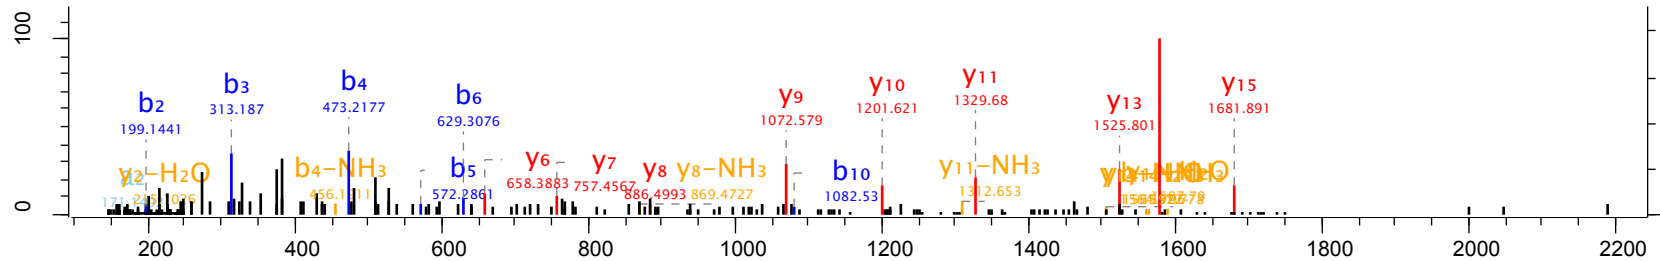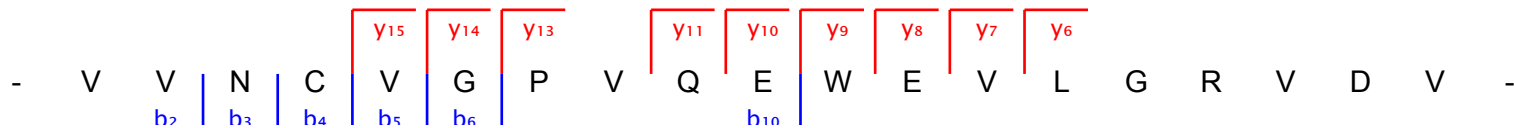

Raw file

Scan

Method

Score

m/z

Gene names

20150228\_yeast1\_Top\_opt\_B1\_01\_1614

58877

TOF; CID

180.48

568.67

ERV14

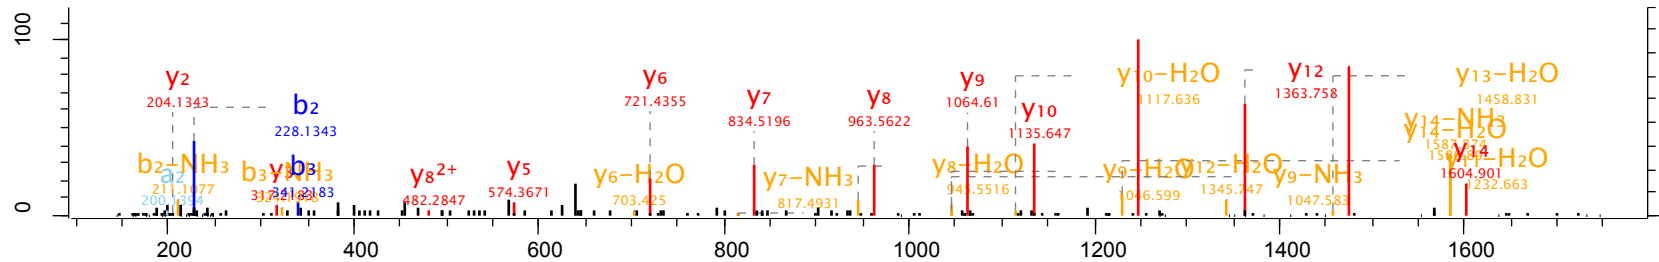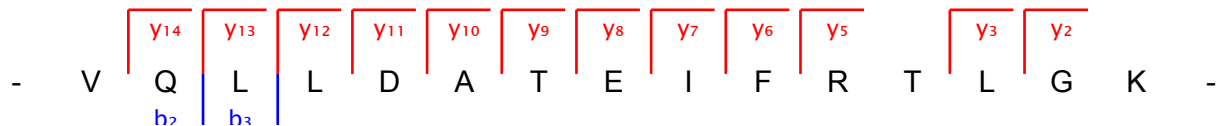

| Raw file                           | Scan  | Method   | Score | m/z    | Gene names |
|------------------------------------|-------|----------|-------|--------|------------|
| 20150228_yeast1_Top_opt_B1_01_1614 | 59939 | TOF; CID | 71.98 | 823.43 | PEX15      |

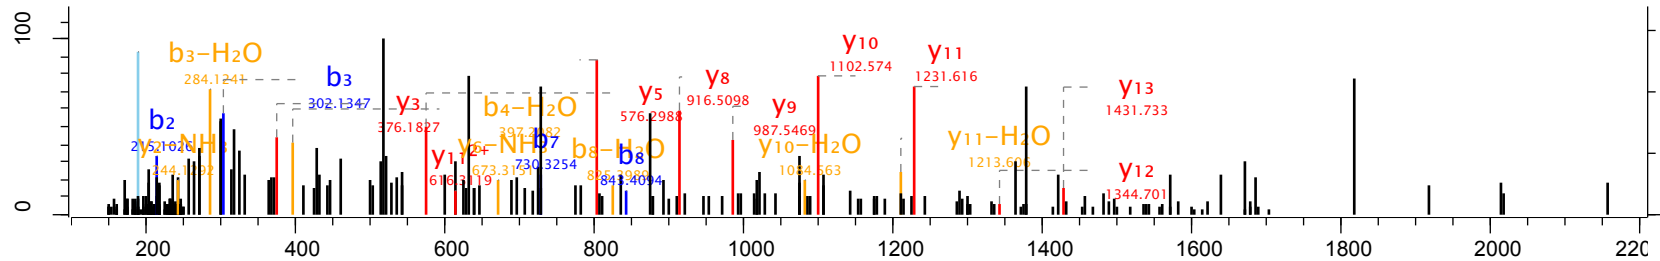

- D V S I E D A I L N S I D N K -

b<sub>2</sub> b<sub>3</sub> y<sub>13</sub> y<sub>12</sub> y<sub>11</sub> y<sub>10</sub> y<sub>9</sub> y<sub>8</sub> y<sub>7</sub> y<sub>5</sub> y<sub>3</sub>  
b<sub>7</sub> b<sub>8</sub>



Raw file

Scan

Method

Score

m/z

Gene names

20150228\_yeast1\_Top\_opt\_B1\_01\_1614

60040

TOF; CID

49.09

1188.56

TRM12

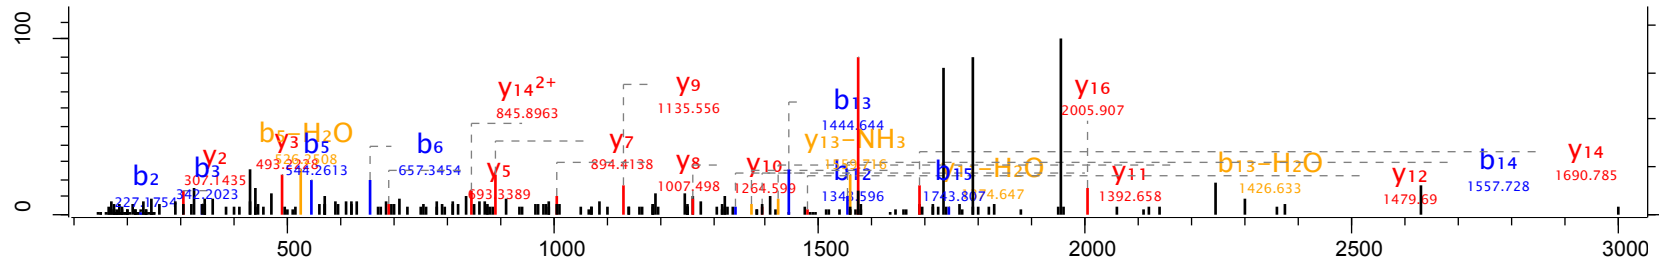

- L I D D S I L D D N D N T L W E N P S Q E

h<sub>2</sub> | h<sub>3</sub> | h<sub>5</sub> | h<sub>6</sub> | h<sub>12</sub> | h<sub>13</sub> | h<sub>14</sub> | h<sub>15</sub>

y16 | y14 | y13 | y12 | y11 | y10

Raw file

20150228\_yeast1\_Top\_opt\_B1\_01\_1614

Scan

60254

Method

TOF; CID

Score

65.1

m/z

1077.53

Gene names

APQ12

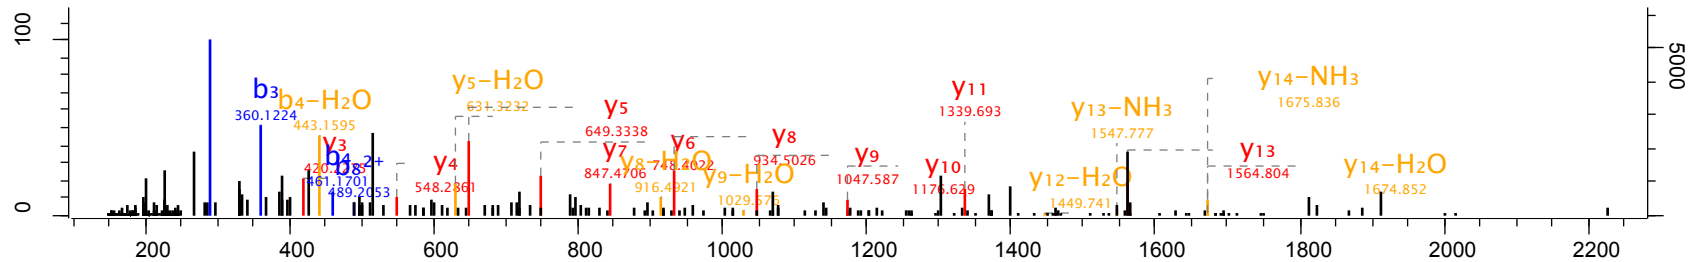

ac

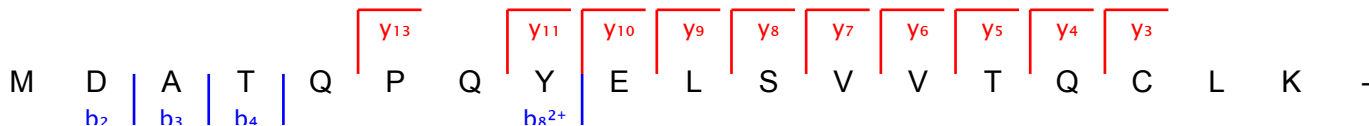

Raw file

Scan

Method

Score

m/z

Gene names

20150228\_yeast1\_Top\_opt\_B1\_01\_1614

64548

TOF; CID

73.88

729.9

CWP2

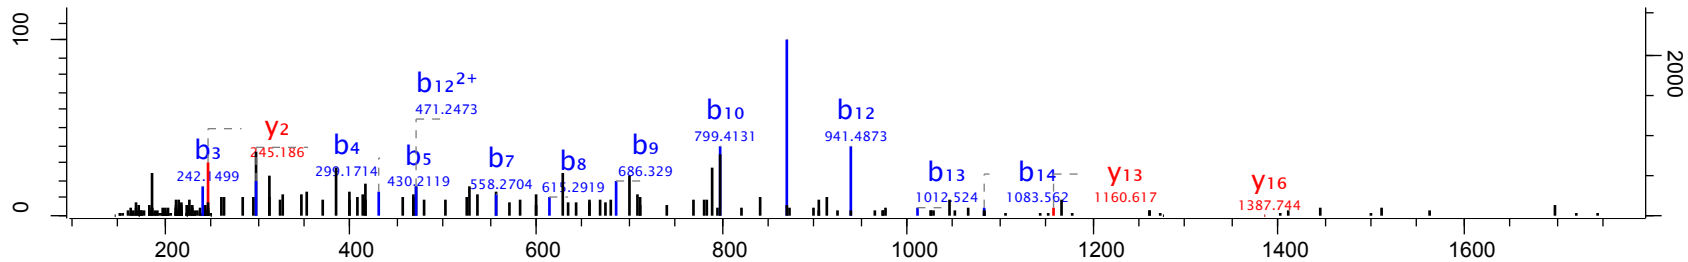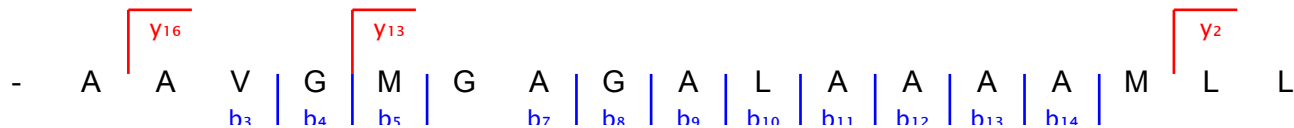

| Raw file                           | Scan  | Method   | Score  | m/z   | Gene names |
|------------------------------------|-------|----------|--------|-------|------------|
| 20150228_yeast1_Top_opt_B1_01_1614 | 65011 | TOF; CID | 103.55 | 577.8 | DID4       |

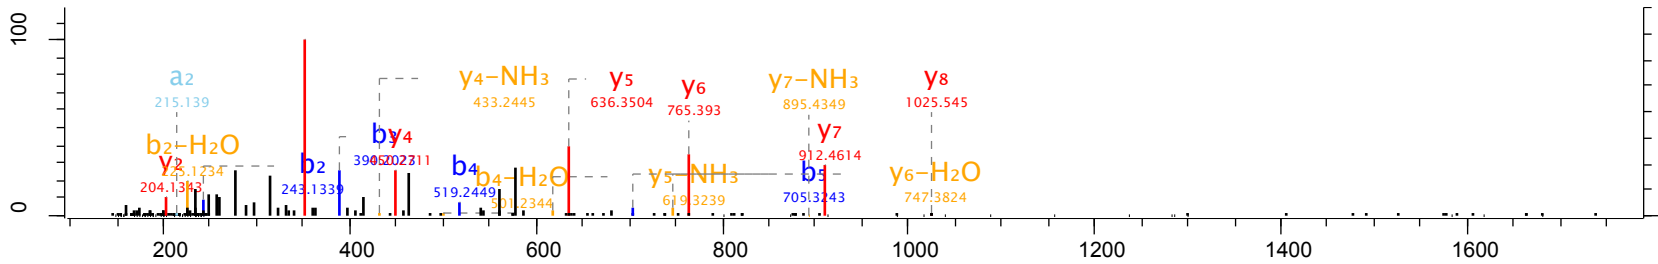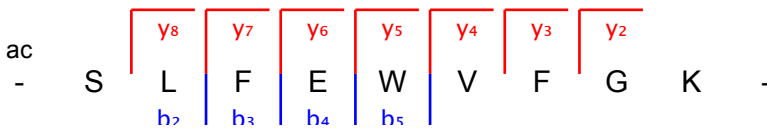

Supplement: supp_M114.047407_mcp.M114.047407-6.pdf [file supp_M114.047407_mcp.M114.047407-6.pdf]
