# Supplementary material for: The Impact II, a Very High-Resolution Quadrupole Time-of-Flight Instrument (QTOF) for Deep Shotgun Proteomics
Source: PubMed Central journal article supplement (PMC4587313; doi:10.1074/mcp.m114.047407), 2015-05-19

Raw file

025pmolUPS2\_500ngY\_90min1Hz1pr\_BC1\_01\_350

Scan

Method

Score

Mass

2192

TOF; CID

58.82

986.52

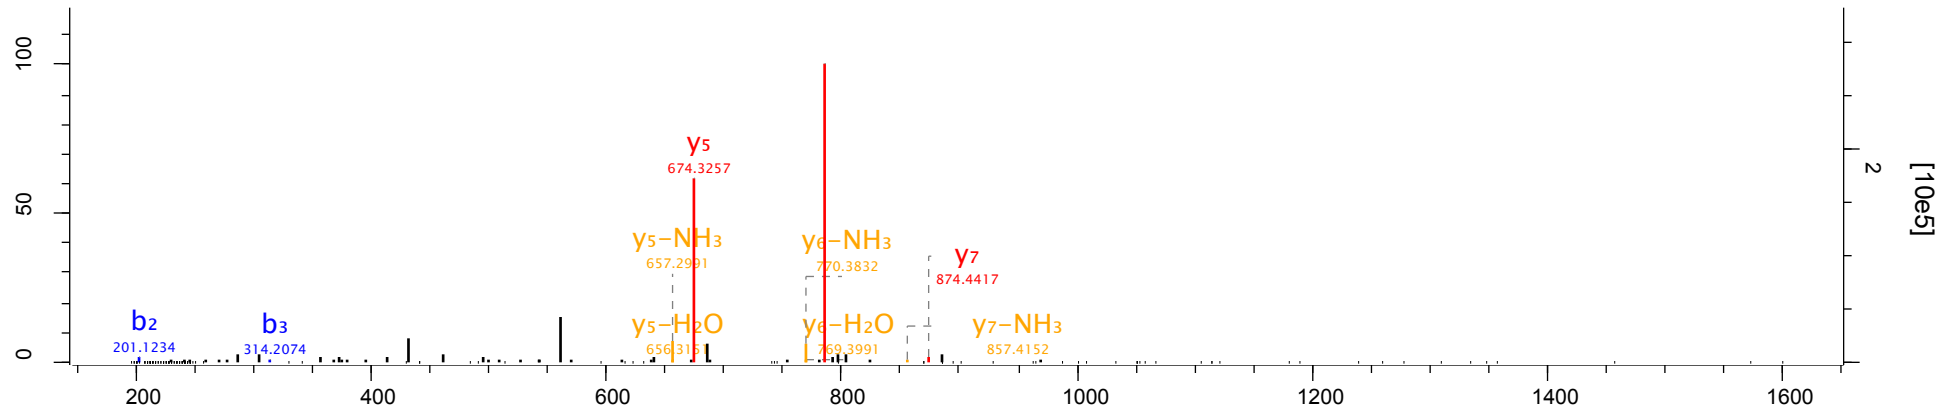

| Raw file                                 | Scan | Method   | Score | Mass  | Gene names |
|------------------------------------------|------|----------|-------|-------|------------|
| 05pmolUPS2_500ngY_90min1Hz1pr_BC2_01_351 | 2836 | TOF; CID | 64.76 | 793.4 | RAD30      |

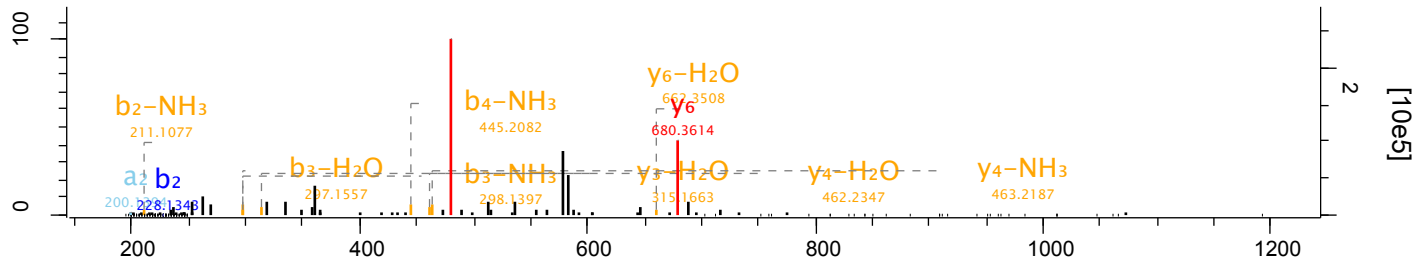

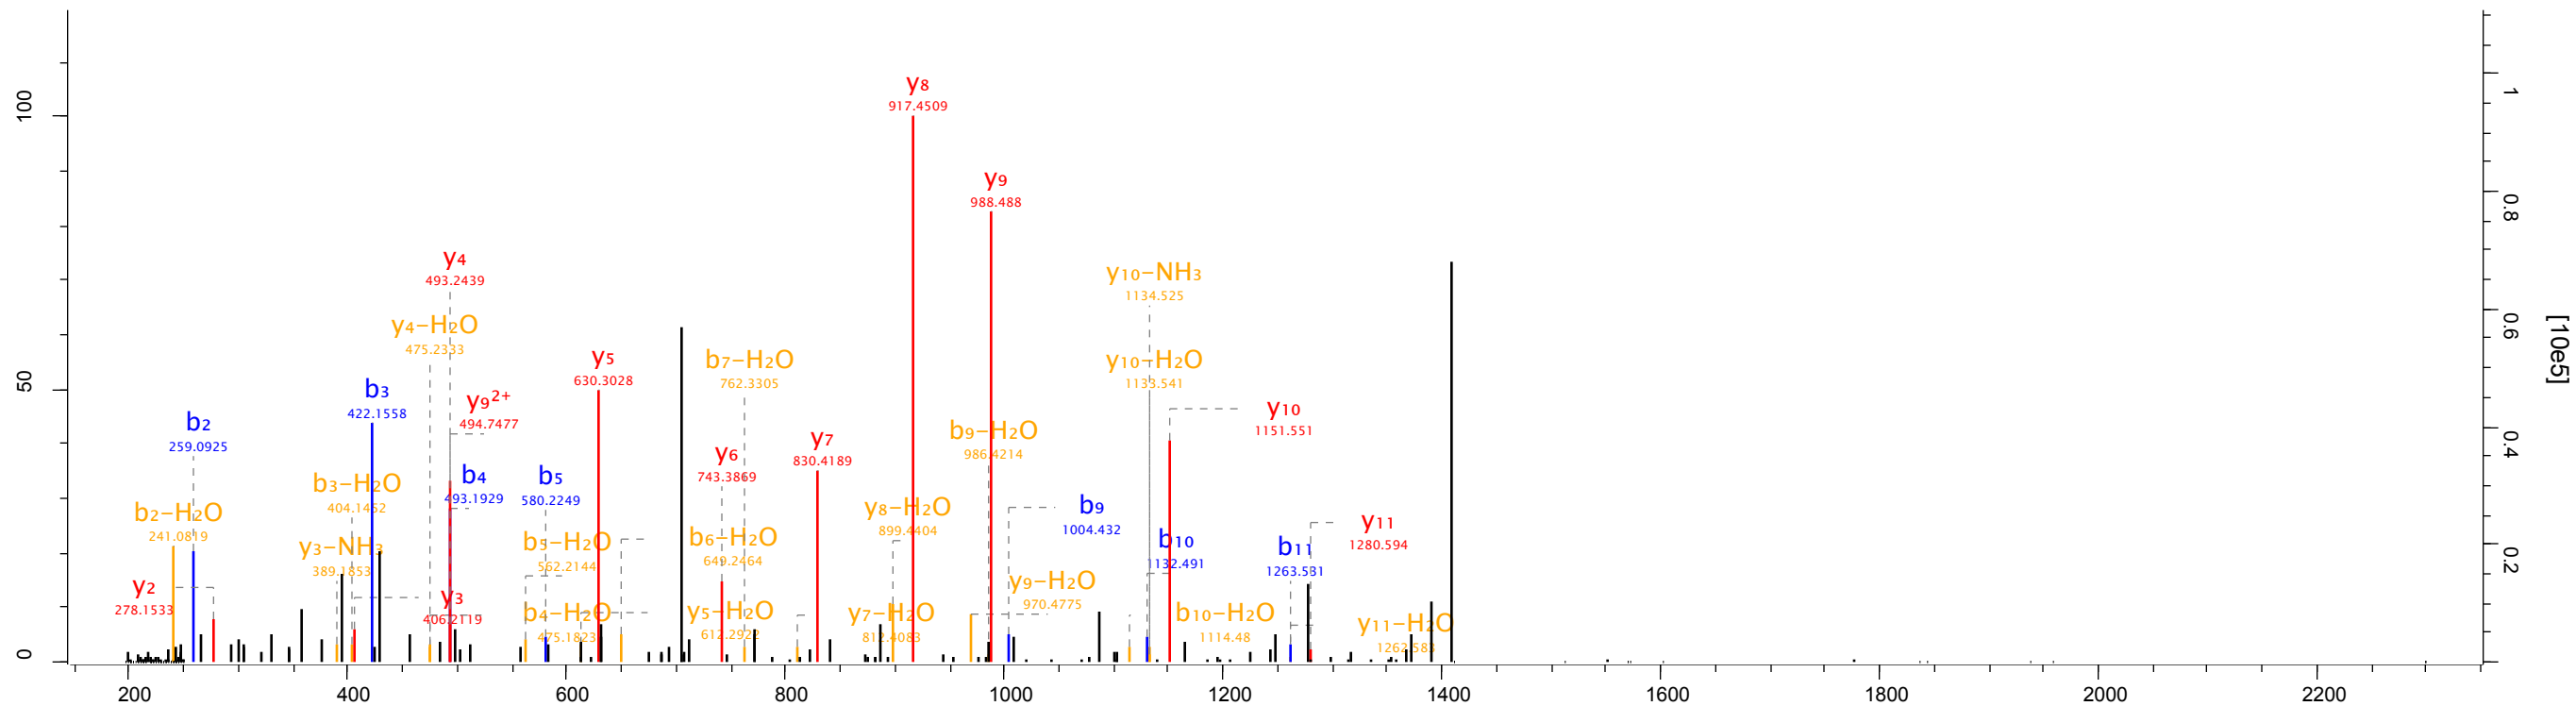

Raw file 025pmolUPS2\_500ngY\_90min1Hz1pr\_BC1\_01\_341 Scan 4042 Method TOF; CID Score 179.51 Mass 1306.73 Gene names RPL39

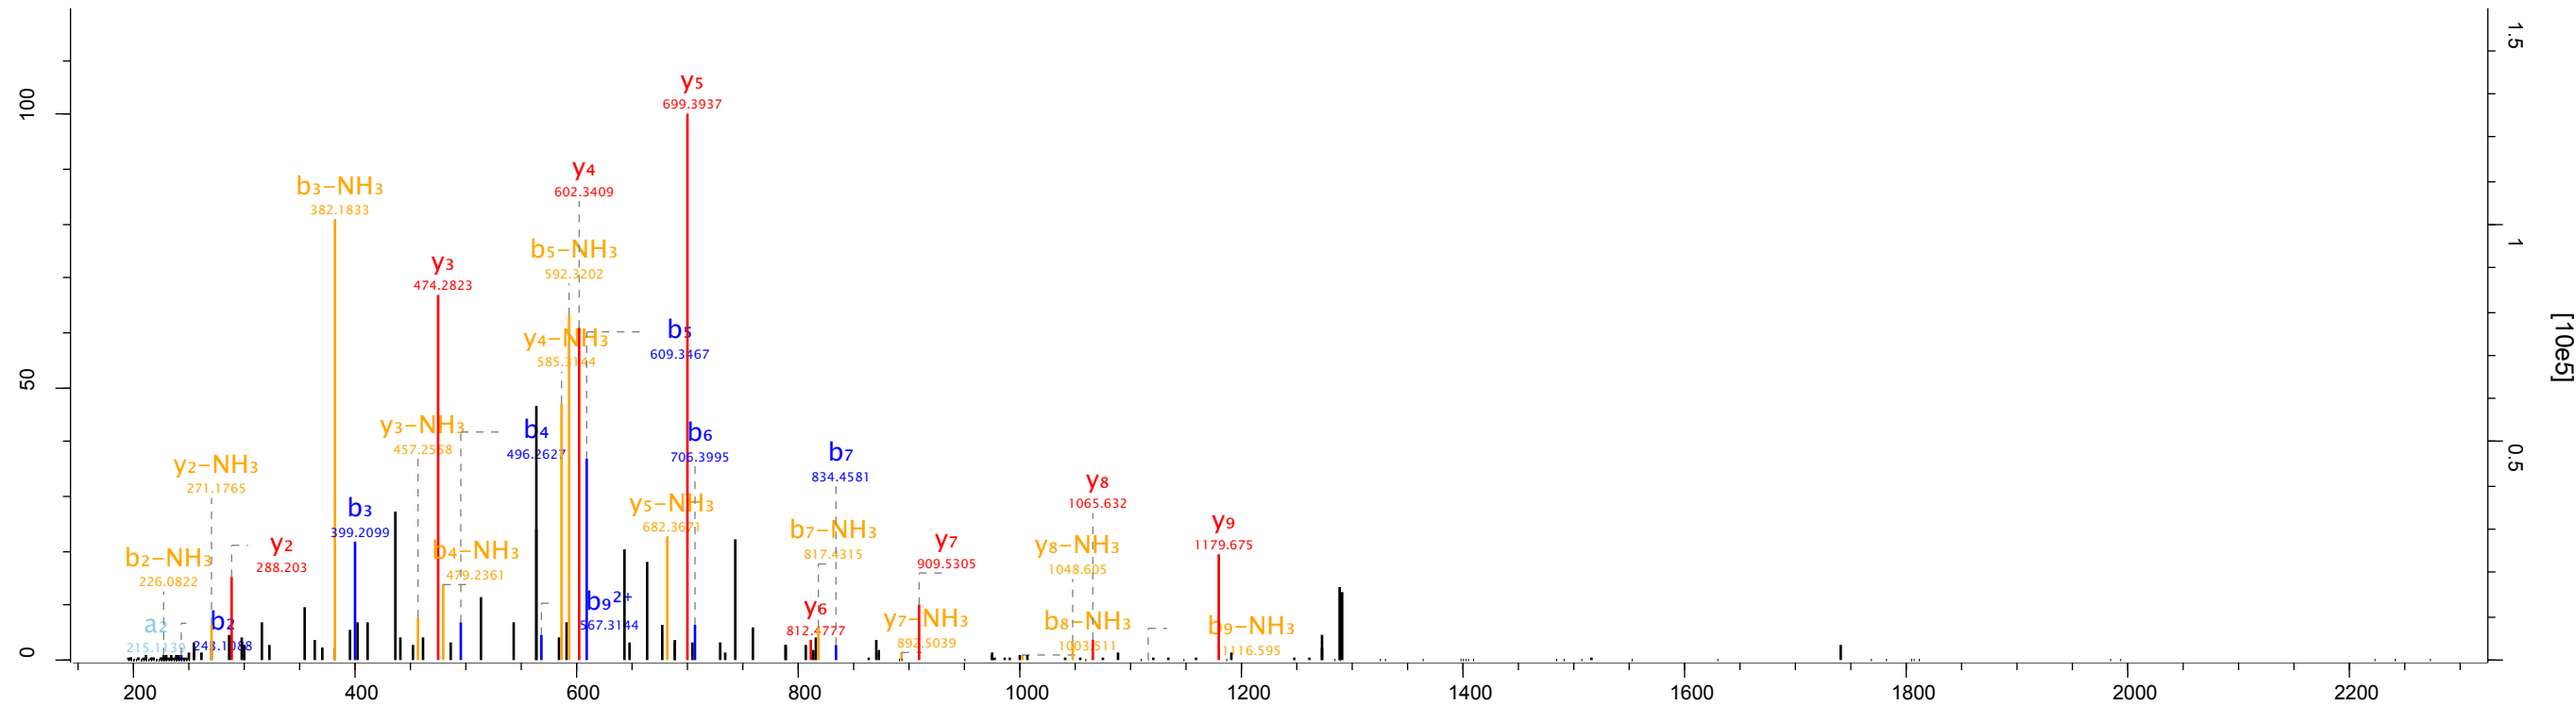

Raw file  
025pmolUPS2\_500ngY\_90min1Hz1pr\_BC1\_01\_338

| Scan | Method   | Score  | Mass    | Gene names |
|------|----------|--------|---------|------------|
| 4528 | TOF; CID | 112.24 | 1313.68 | VMA10      |

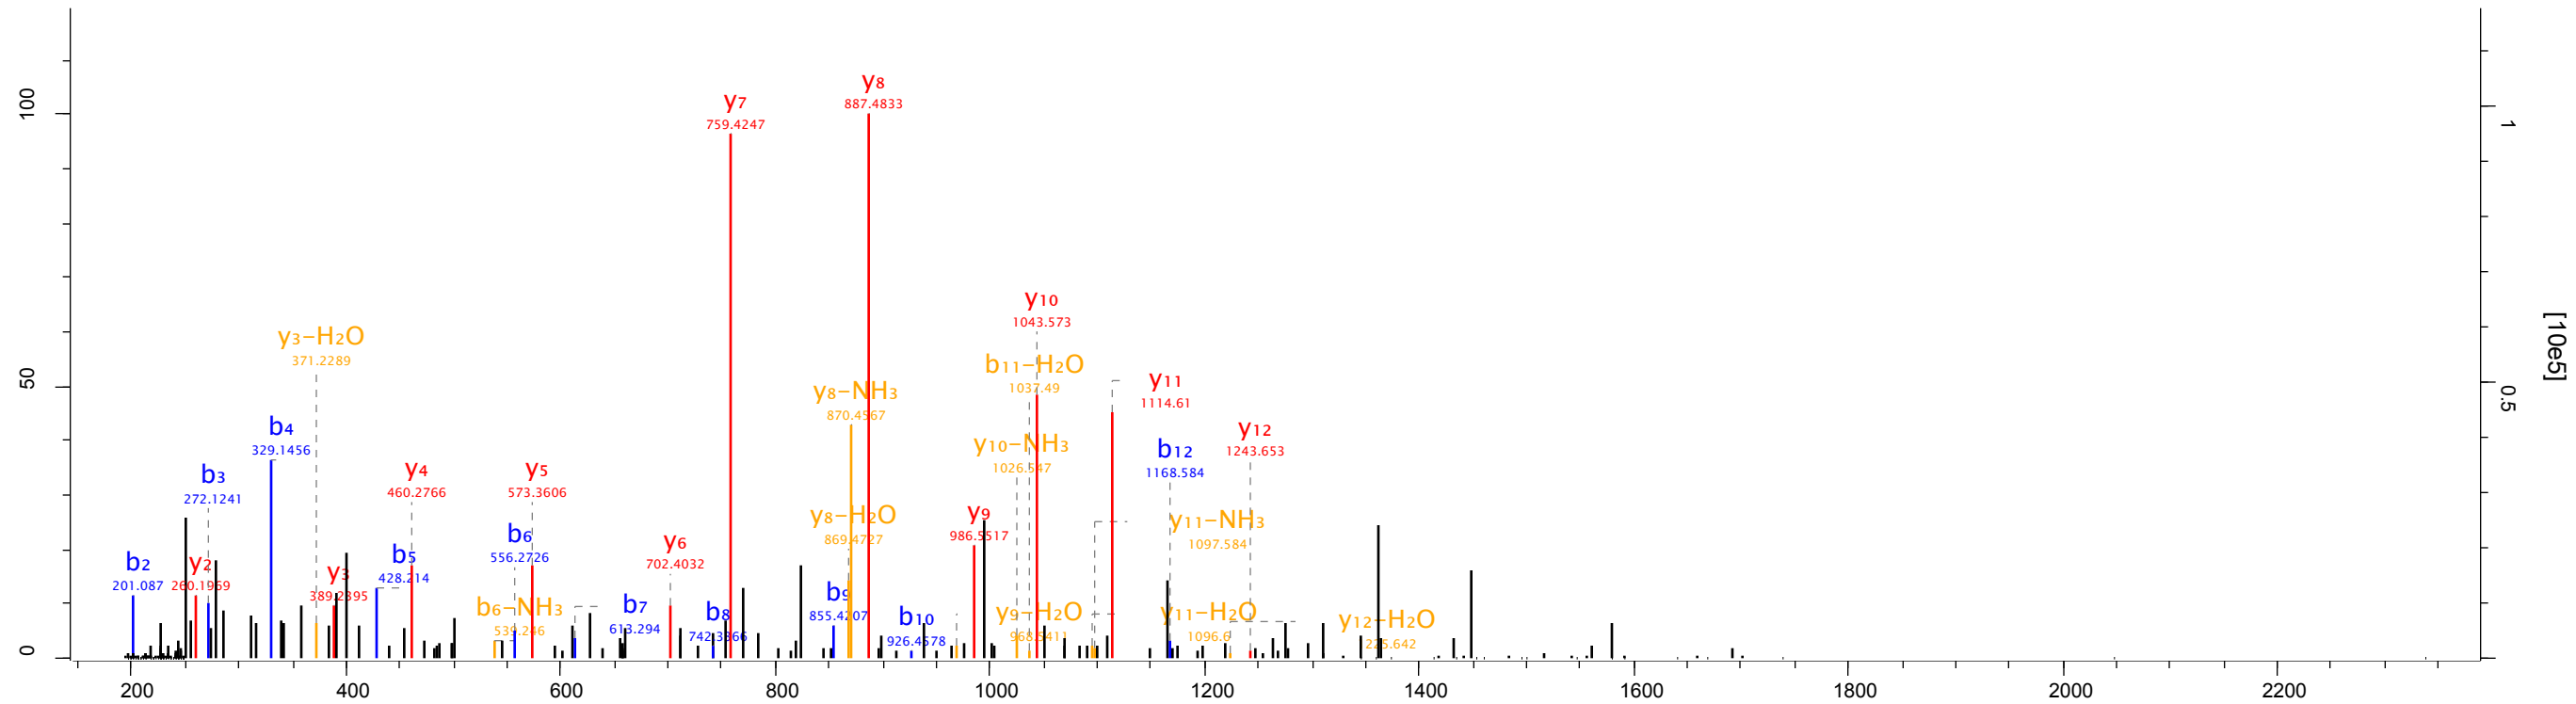

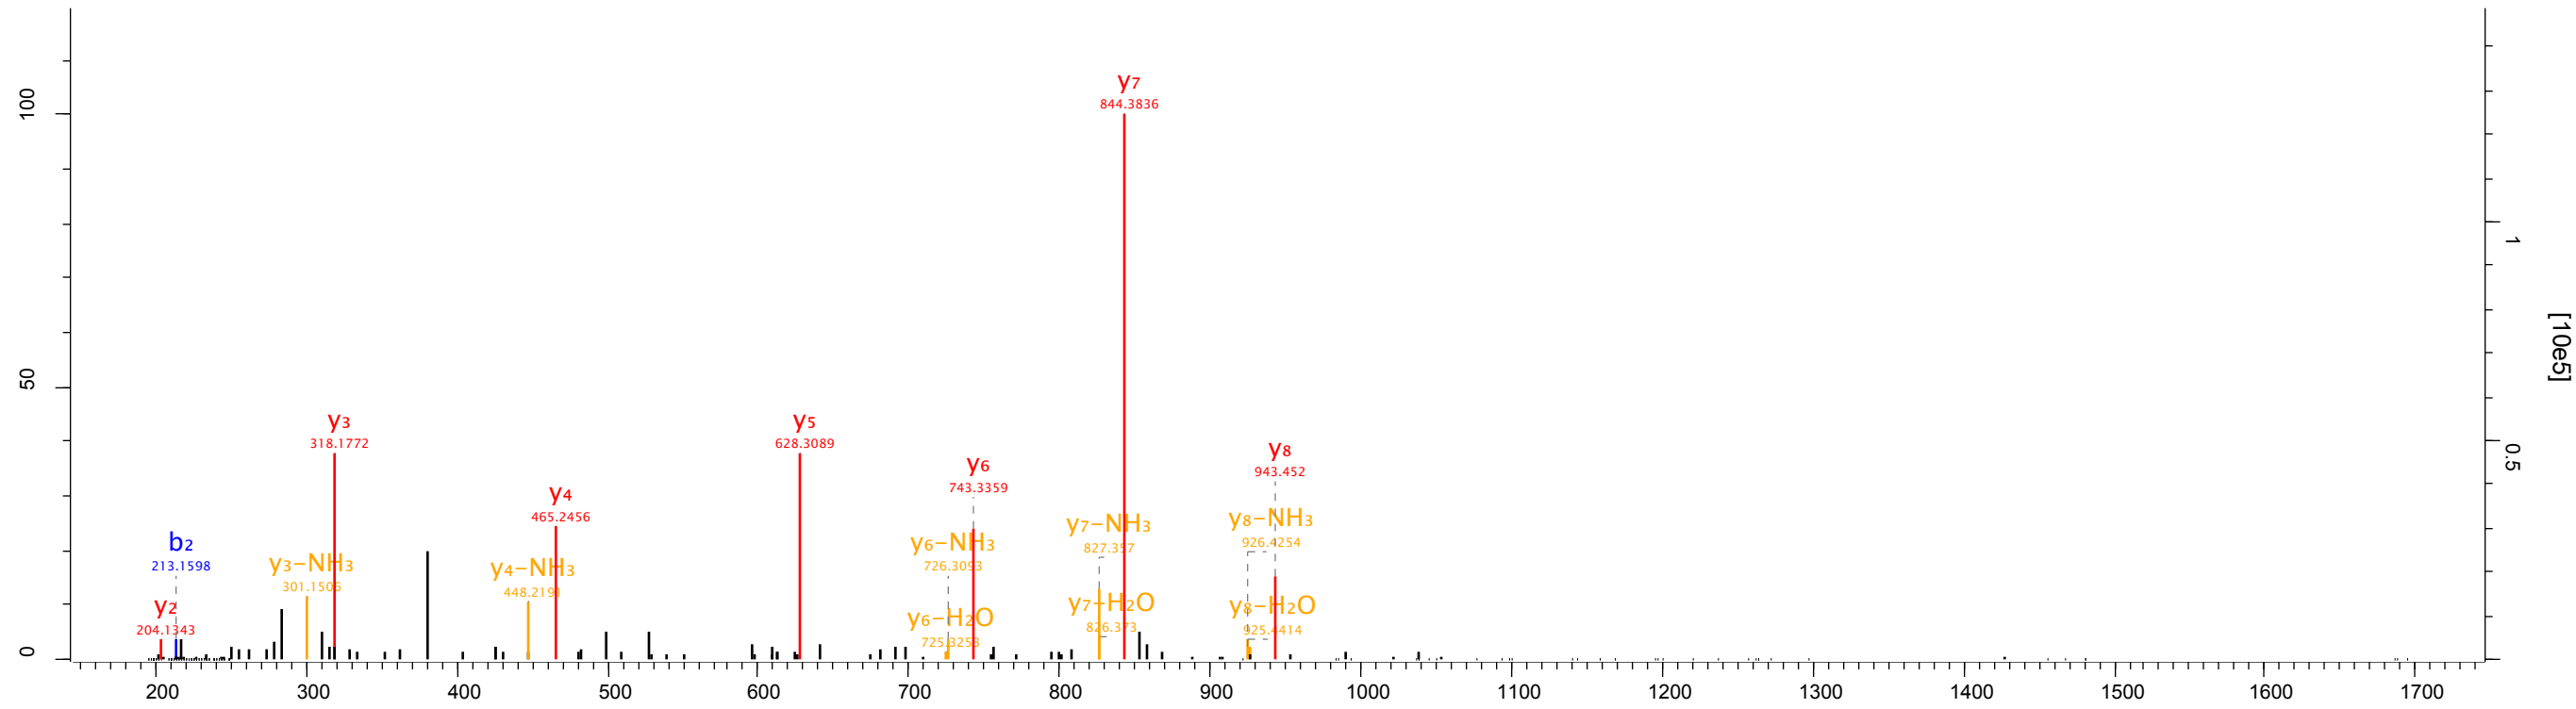

Raw file

05pmolUPS2\_500ngY\_90min1Hz1pr\_BC2\_01\_345

| Scan | Method   | Score | Mass   | Gene names |
|------|----------|-------|--------|------------|
| 5262 | TOF; CID | 85.36 | 869.53 | VPS30      |

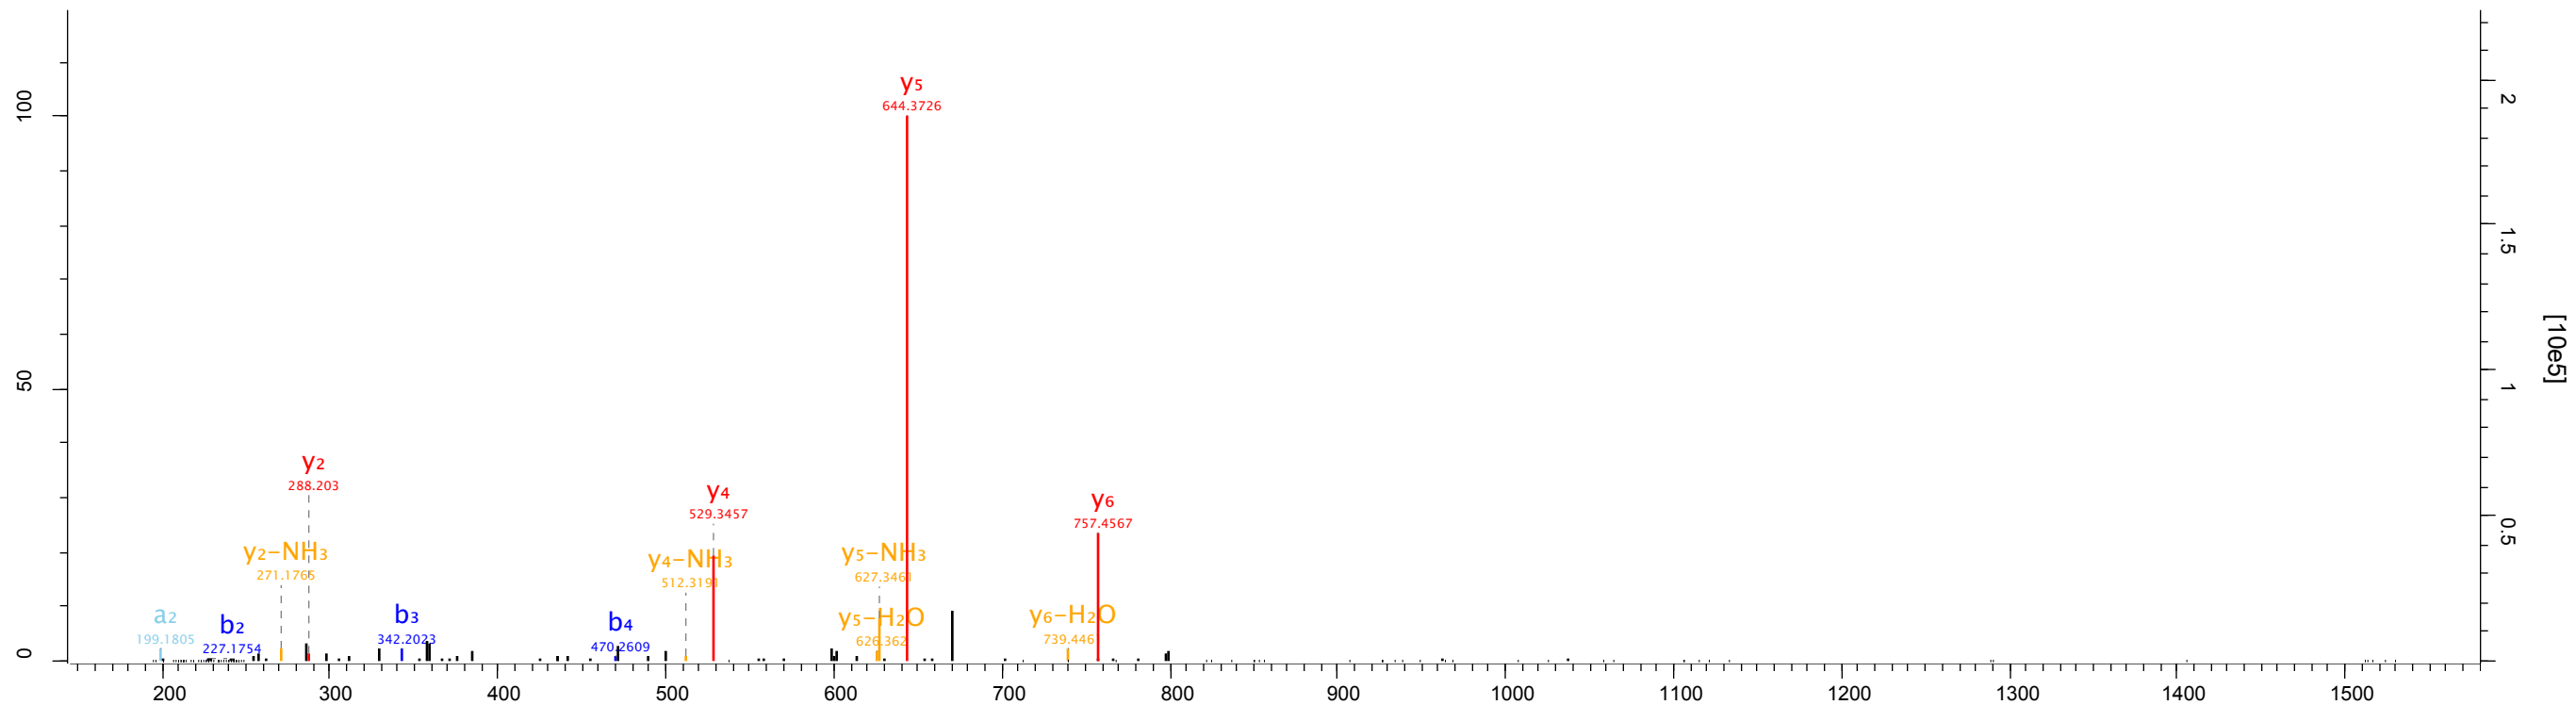

Raw file  
05pmolUPS2\_500ngY\_90min1Hz1pr\_BC2\_01\_354

Scan 5620 Method TOF; CID Score 103.53 Mass 2078.9

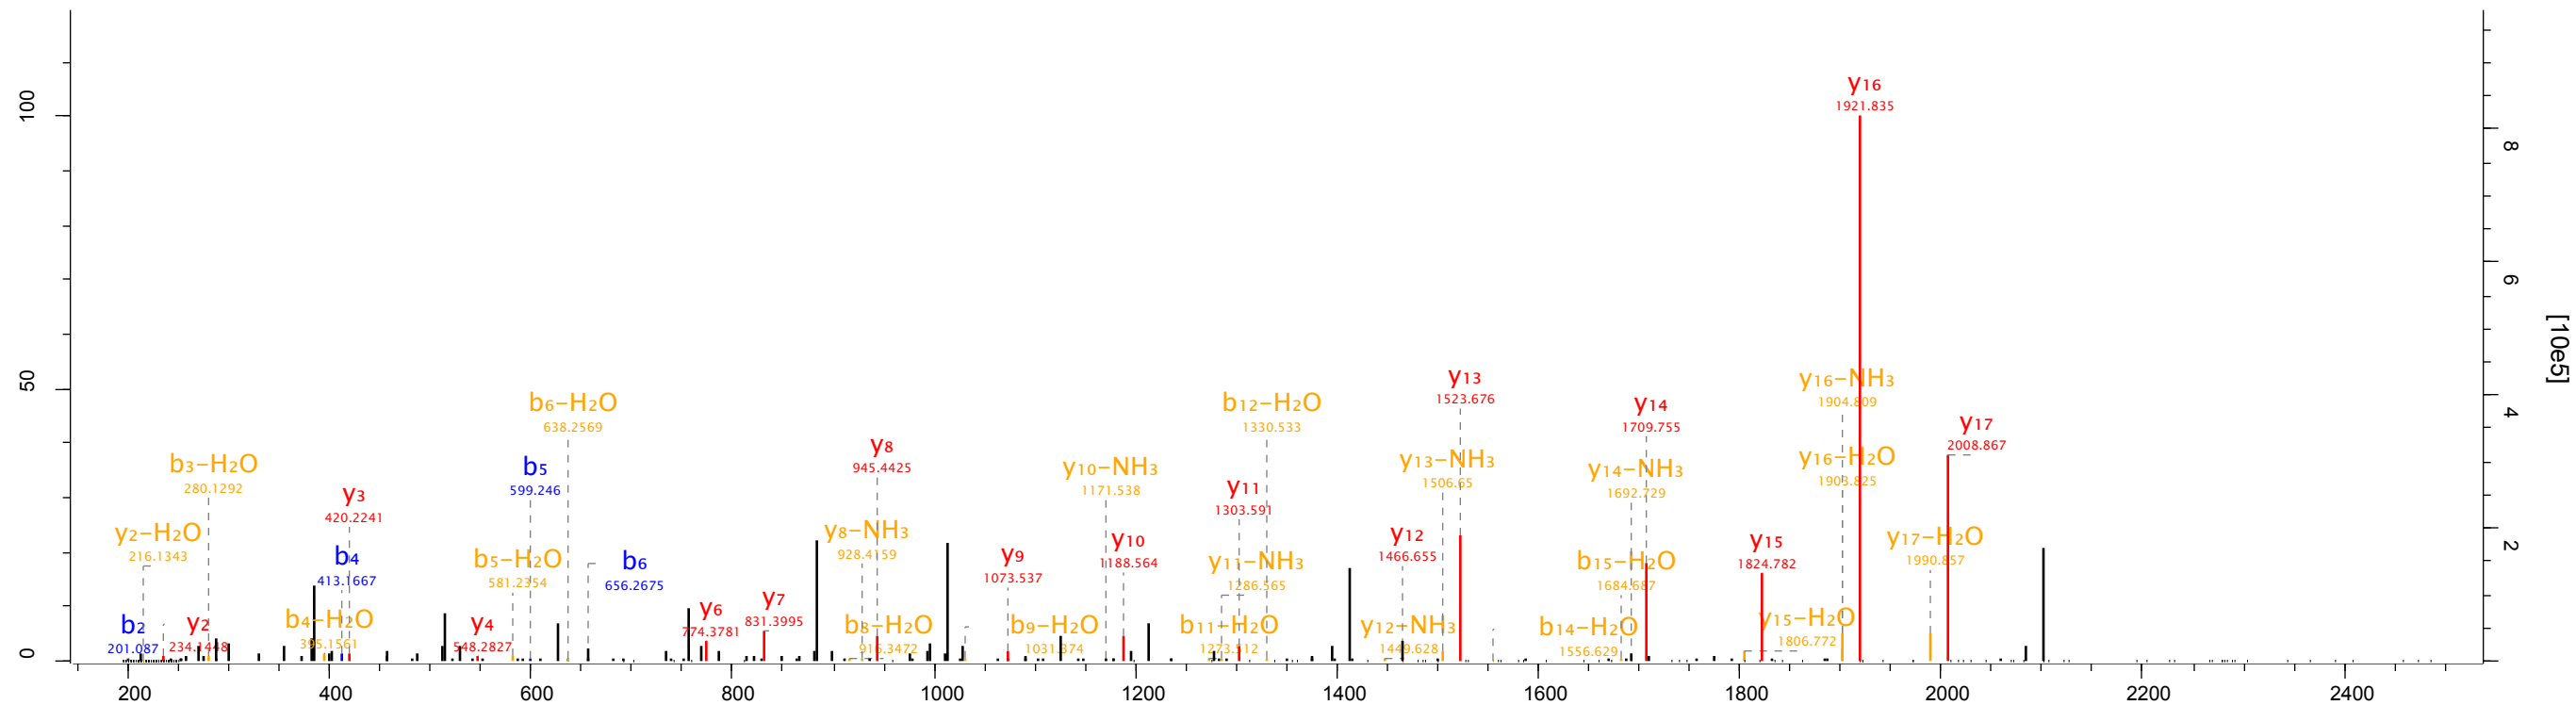



Raw file 05pmolUPS2\_500ngY\_90min1Hz1pr\_BC2\_01\_354 Scan 5894 Method TOF; CID Score 95.09 Mass 1244.64 Gene names UBC5;UBC4

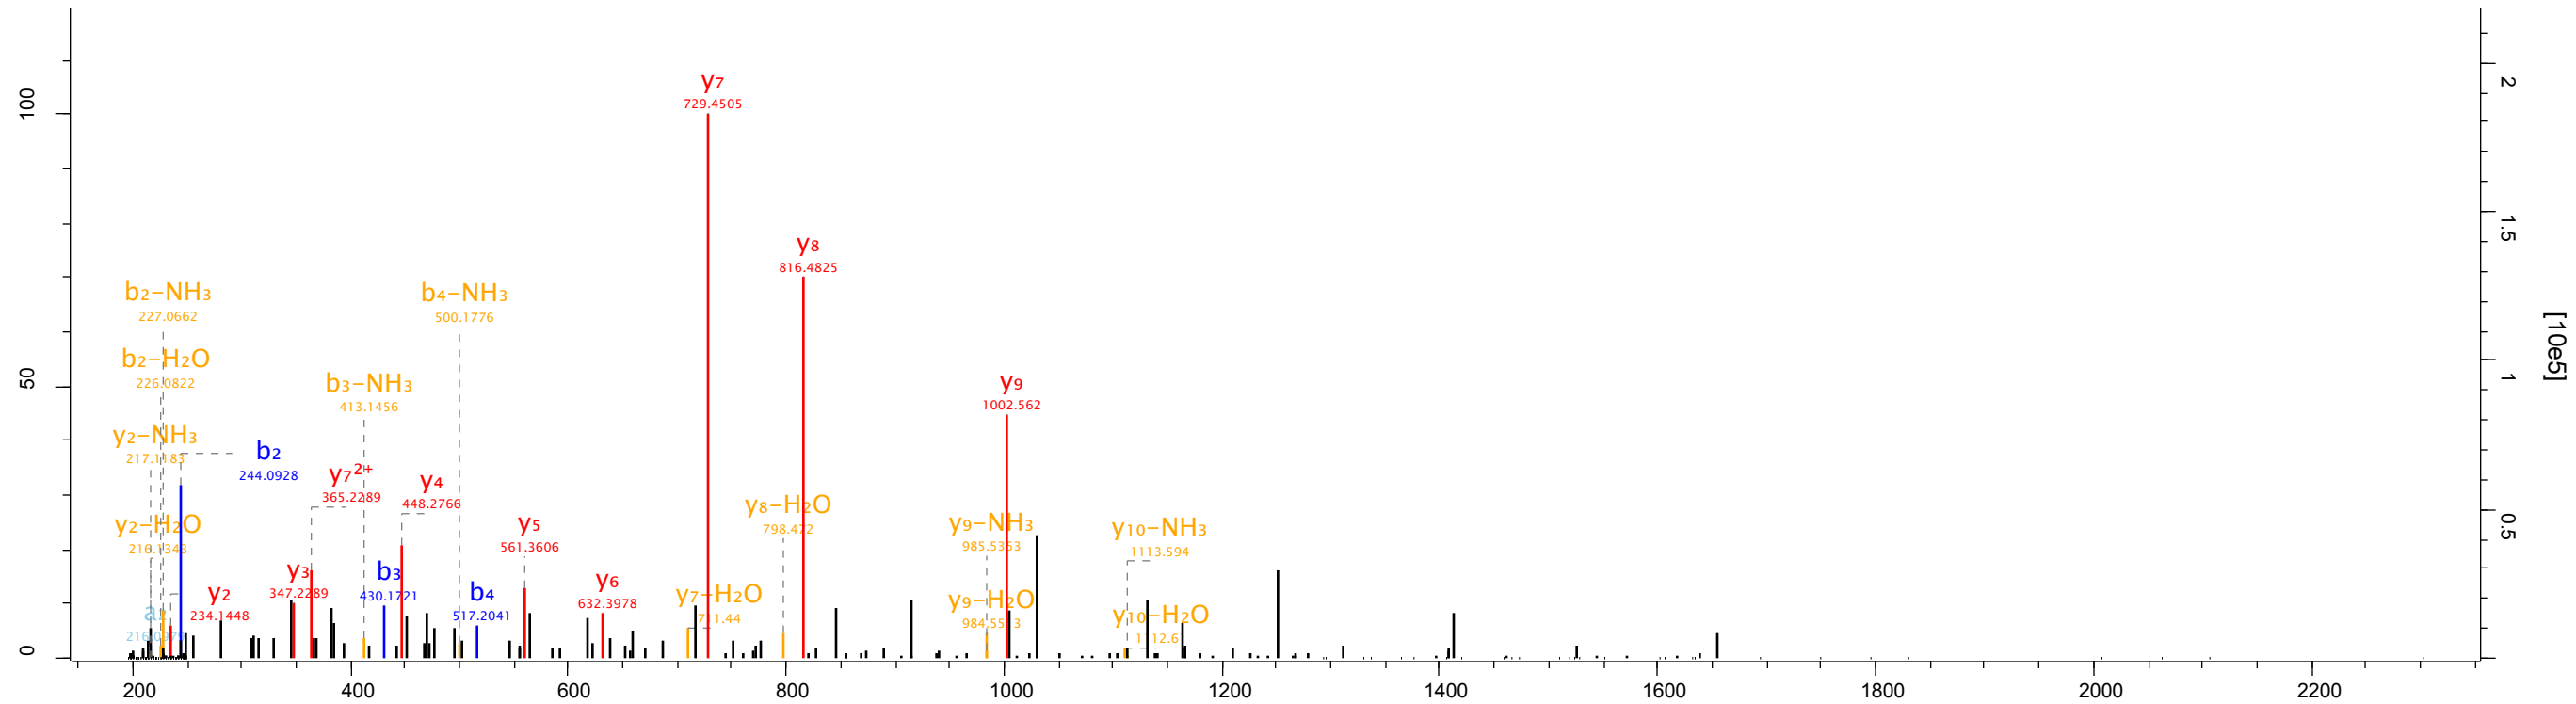

Raw file  
05pmolUPS2\_500ngY\_90min1Hz1pr\_BC2\_01\_351  
Scan 6114 Method TOF; CID Score 145.08 Mass 1184.64 Gene names NCE102

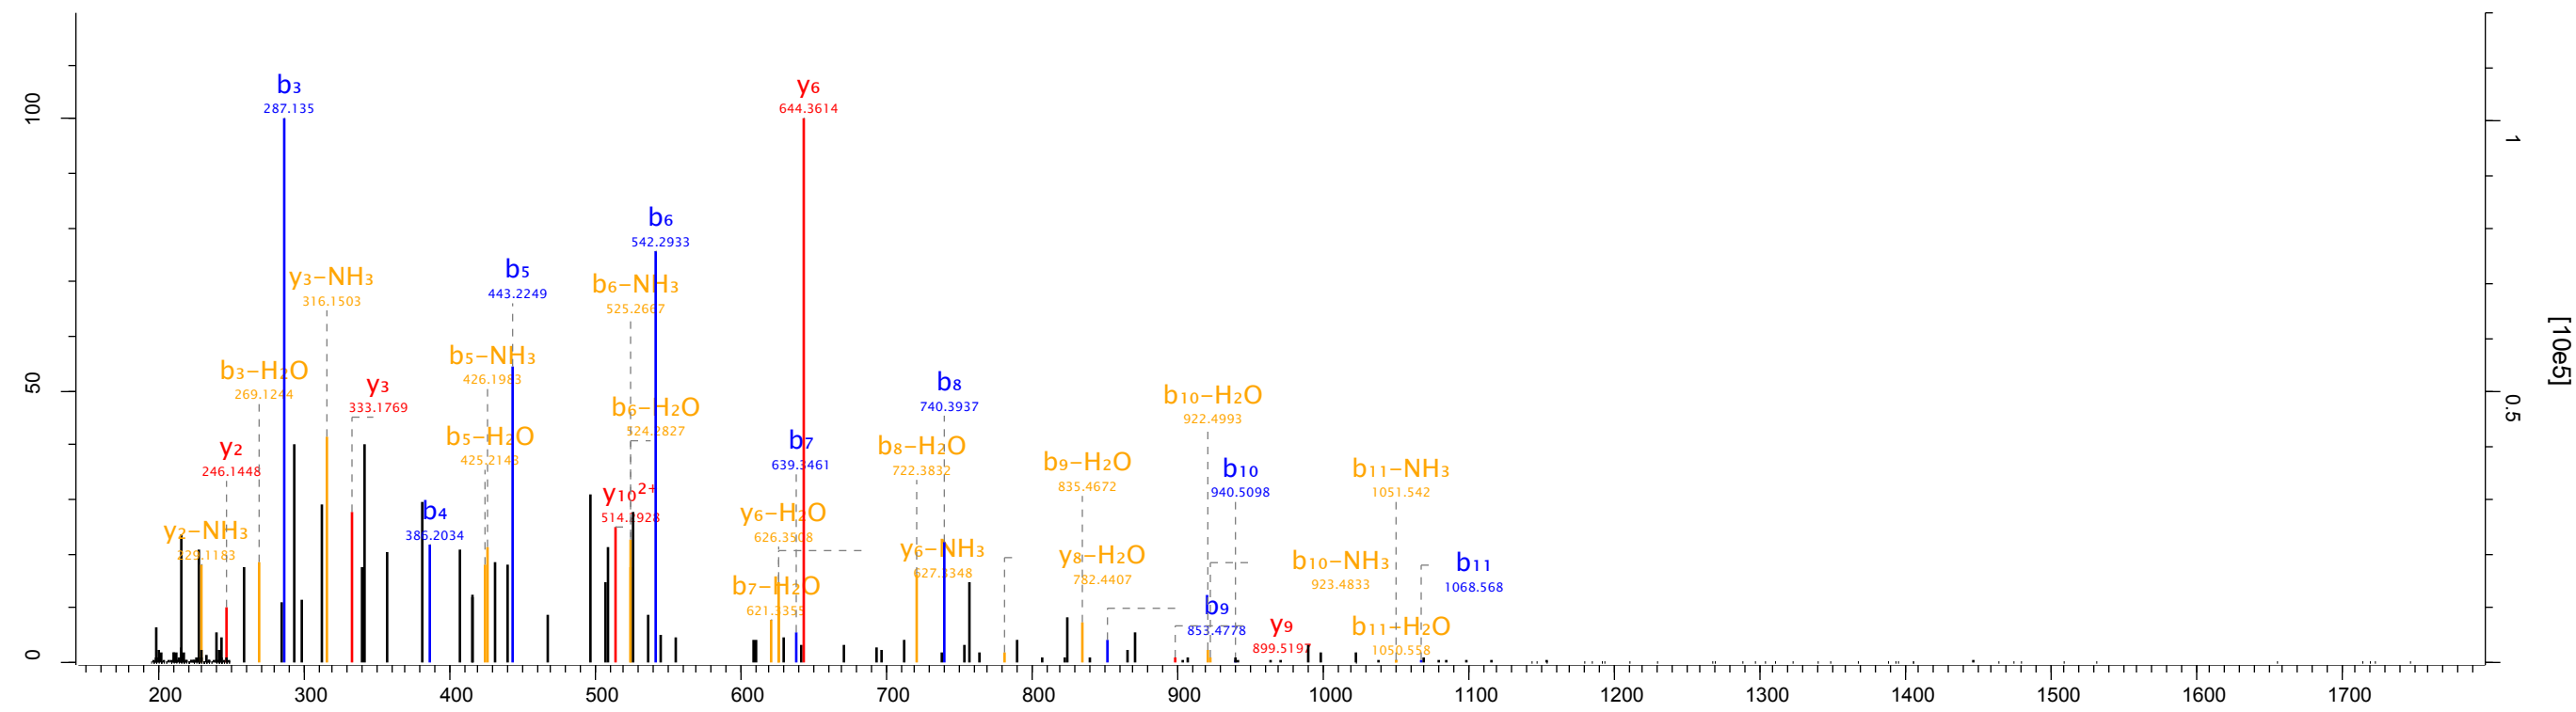

Raw file  
05pmolUPS2\_500ngY\_90min1Hz1pr\_BC2\_01\_351

| Scan | Method   | Score | Mass   | Gene names |
|------|----------|-------|--------|------------|
| 7210 | TOF; CID | 60.76 | 798.47 | YHM2       |

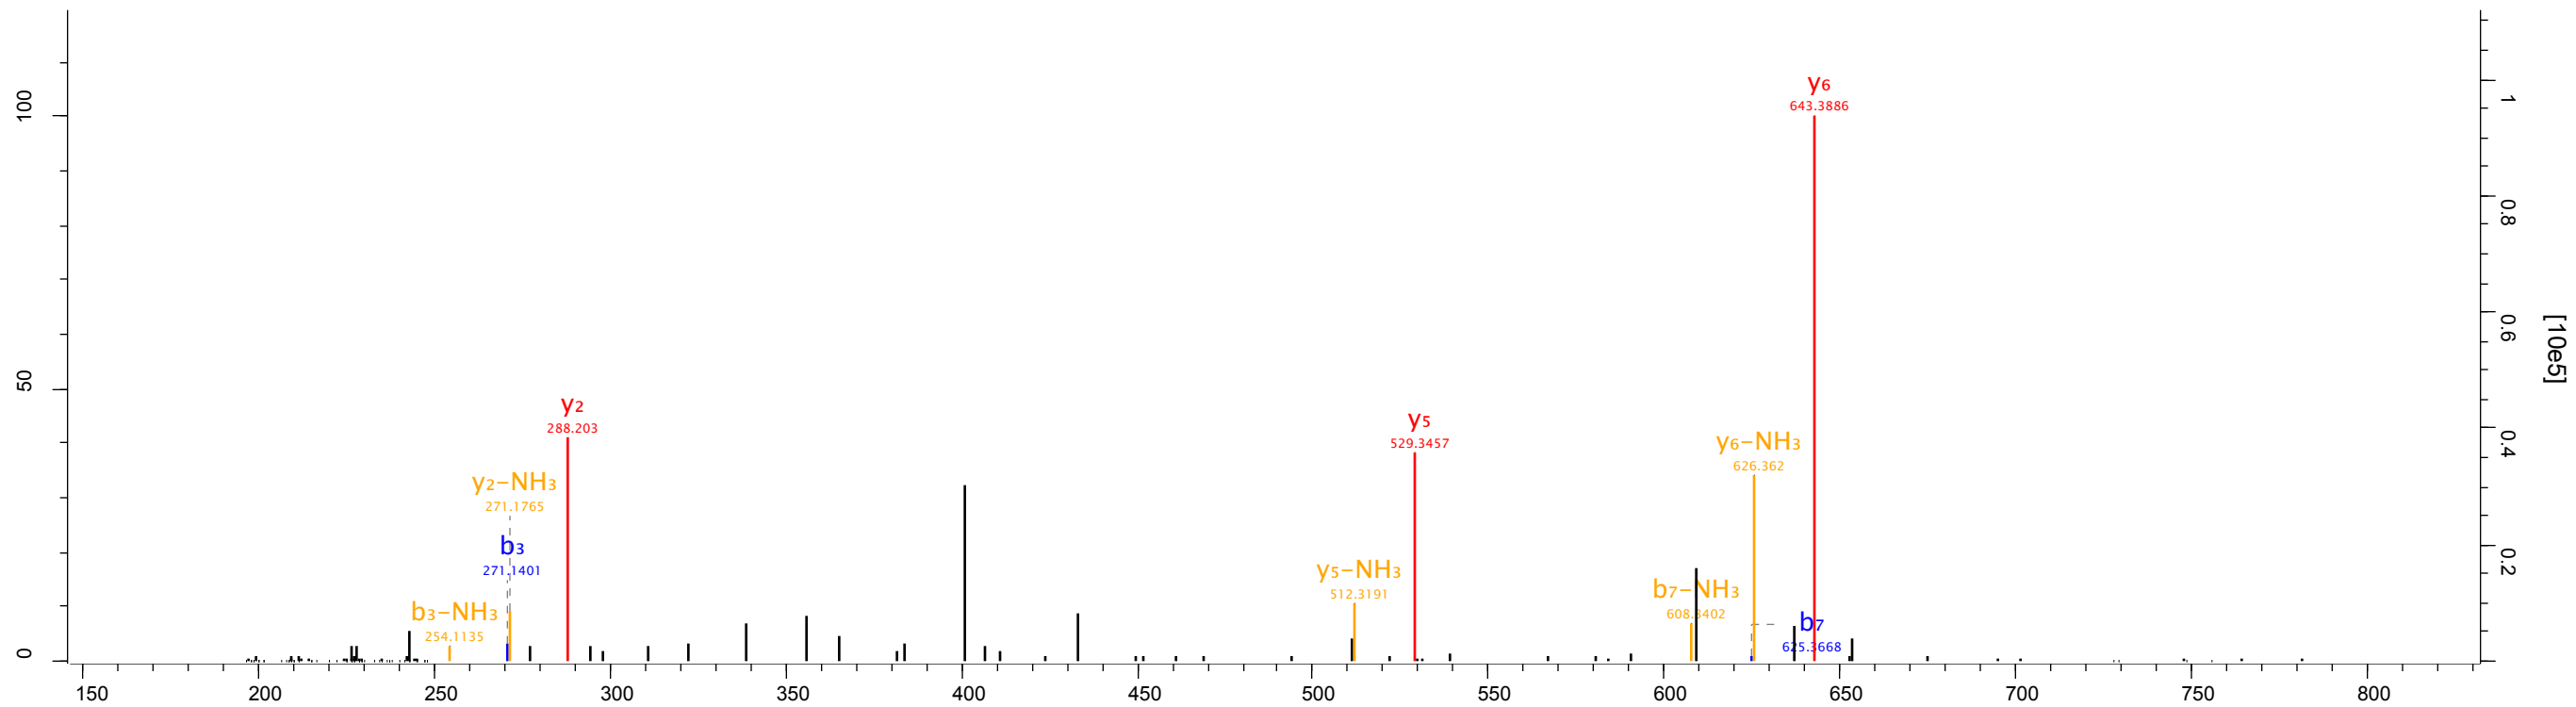

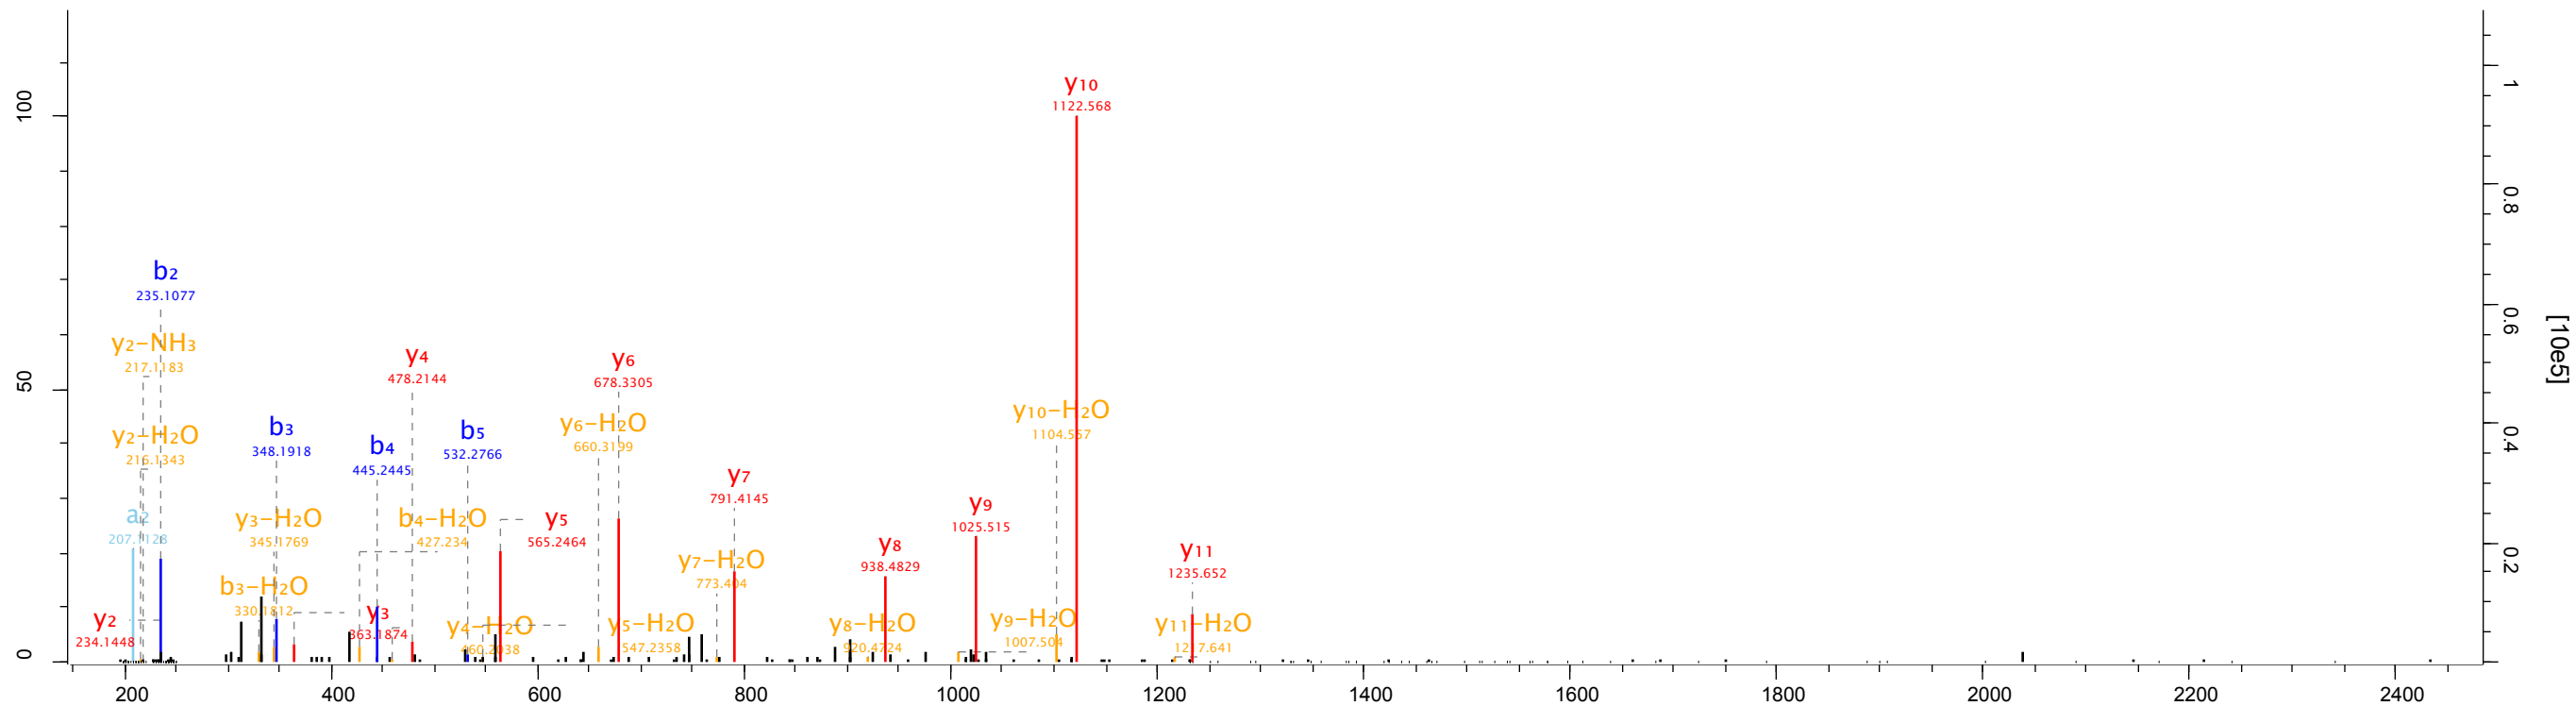

Raw file: 05pmolUPS2\_500ngY\_90min1Hz1pr\_BC2\_01\_339  
Scan: 8826 Method: TOF; CID Score: 75.68 Mass: 2056.08 Gene names: ATX1

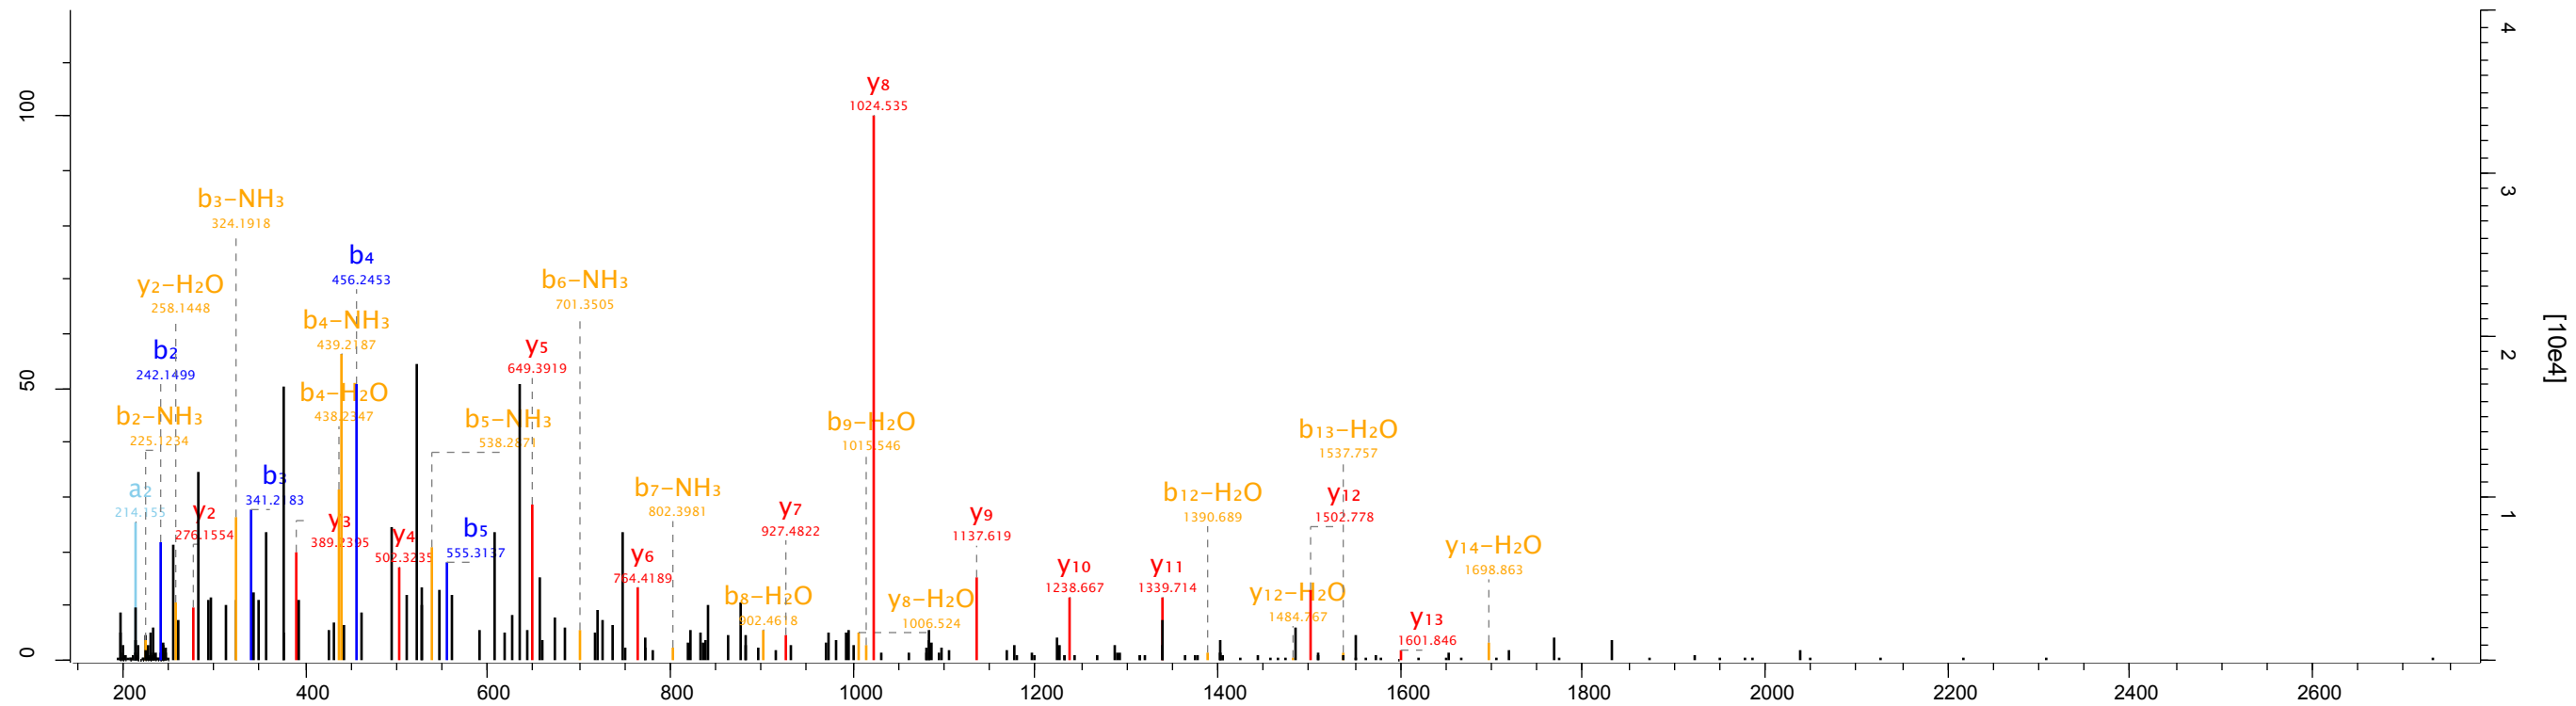

Raw file  
05pmolUPS2\_500ngY\_90min1Hz1pr\_BC2\_01\_354

| Scan | Method   | Score | Mass    | Gene names |
|------|----------|-------|---------|------------|
| 9388 | TOF; CID | 58.63 | 2084.93 | RPB11      |

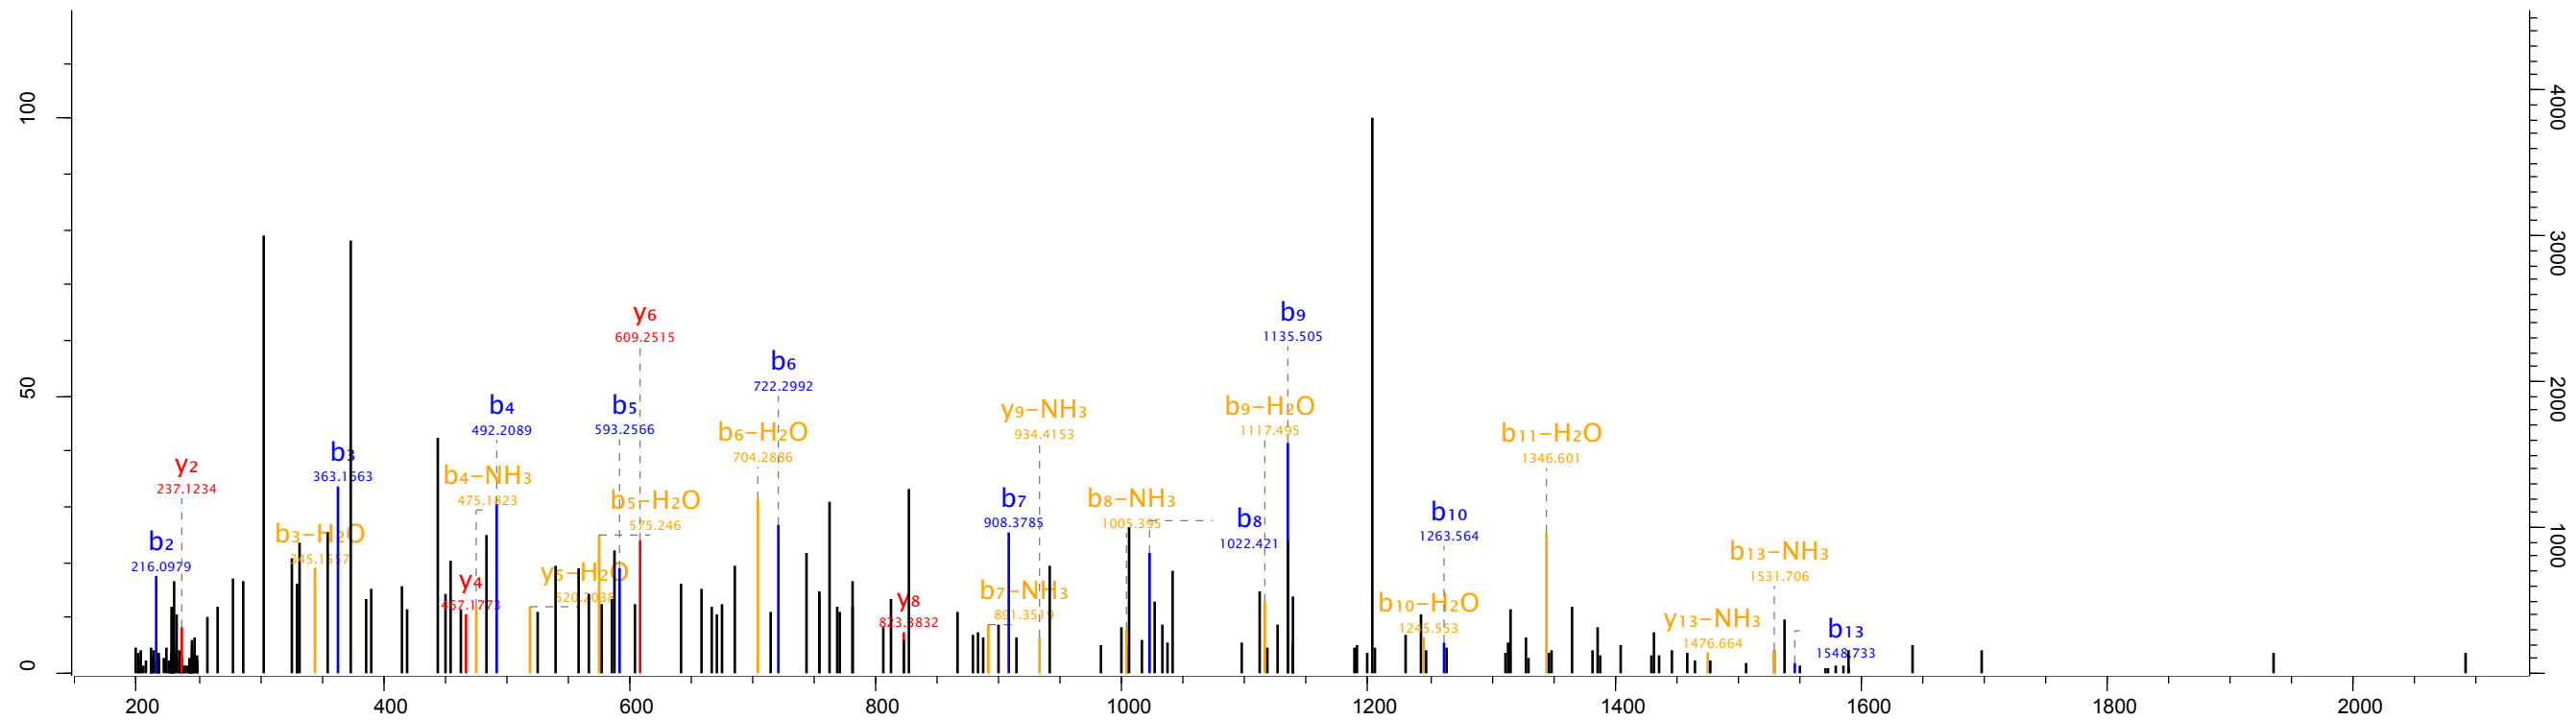

Raw file  
05pmolUPS2\_500ngY\_90min1Hz1pr\_BC2\_01\_351

| Scan  | Method   | Score  | Mass   | Gene names |
|-------|----------|--------|--------|------------|
| 10028 | TOF; CID | 112.06 | 3179.5 | FET3       |

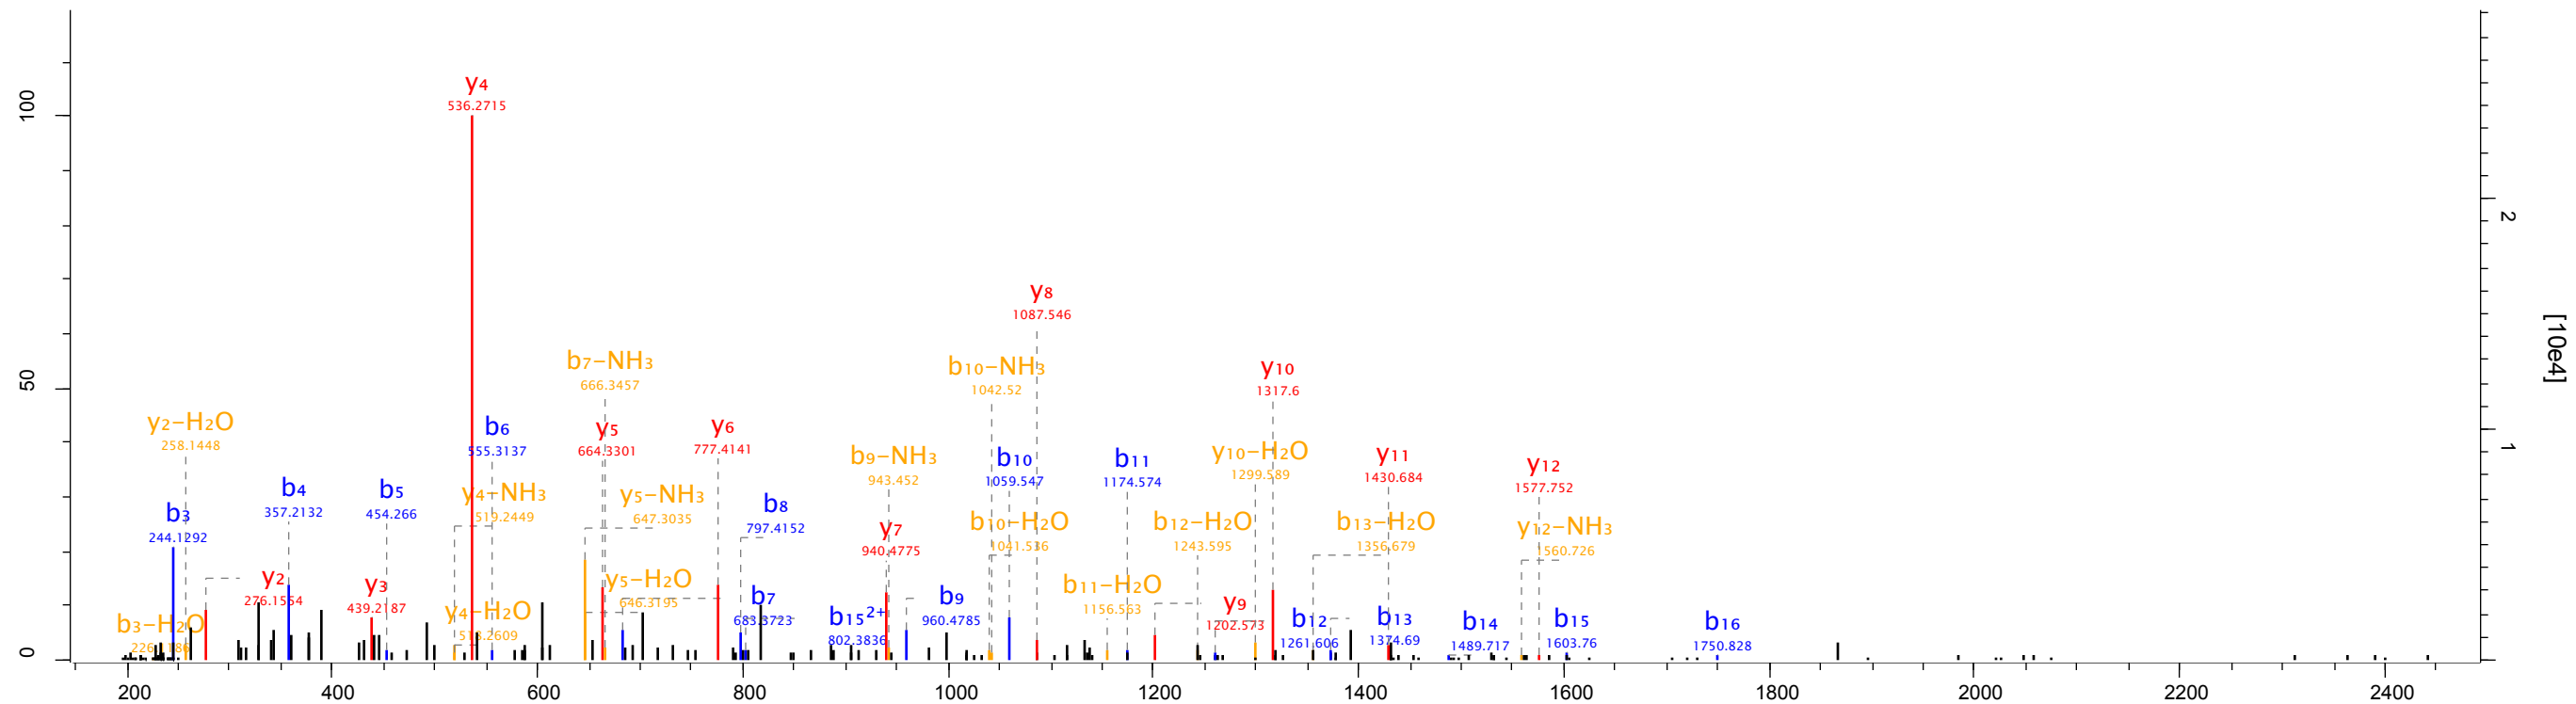

Raw file  
025pmolUPS2\_500ngY\_90min1Hz1pr\_BC1\_01\_350

Scan 10326 Method TOF; CID Score 190.35 Mass 1464.84 Gene names LSM5

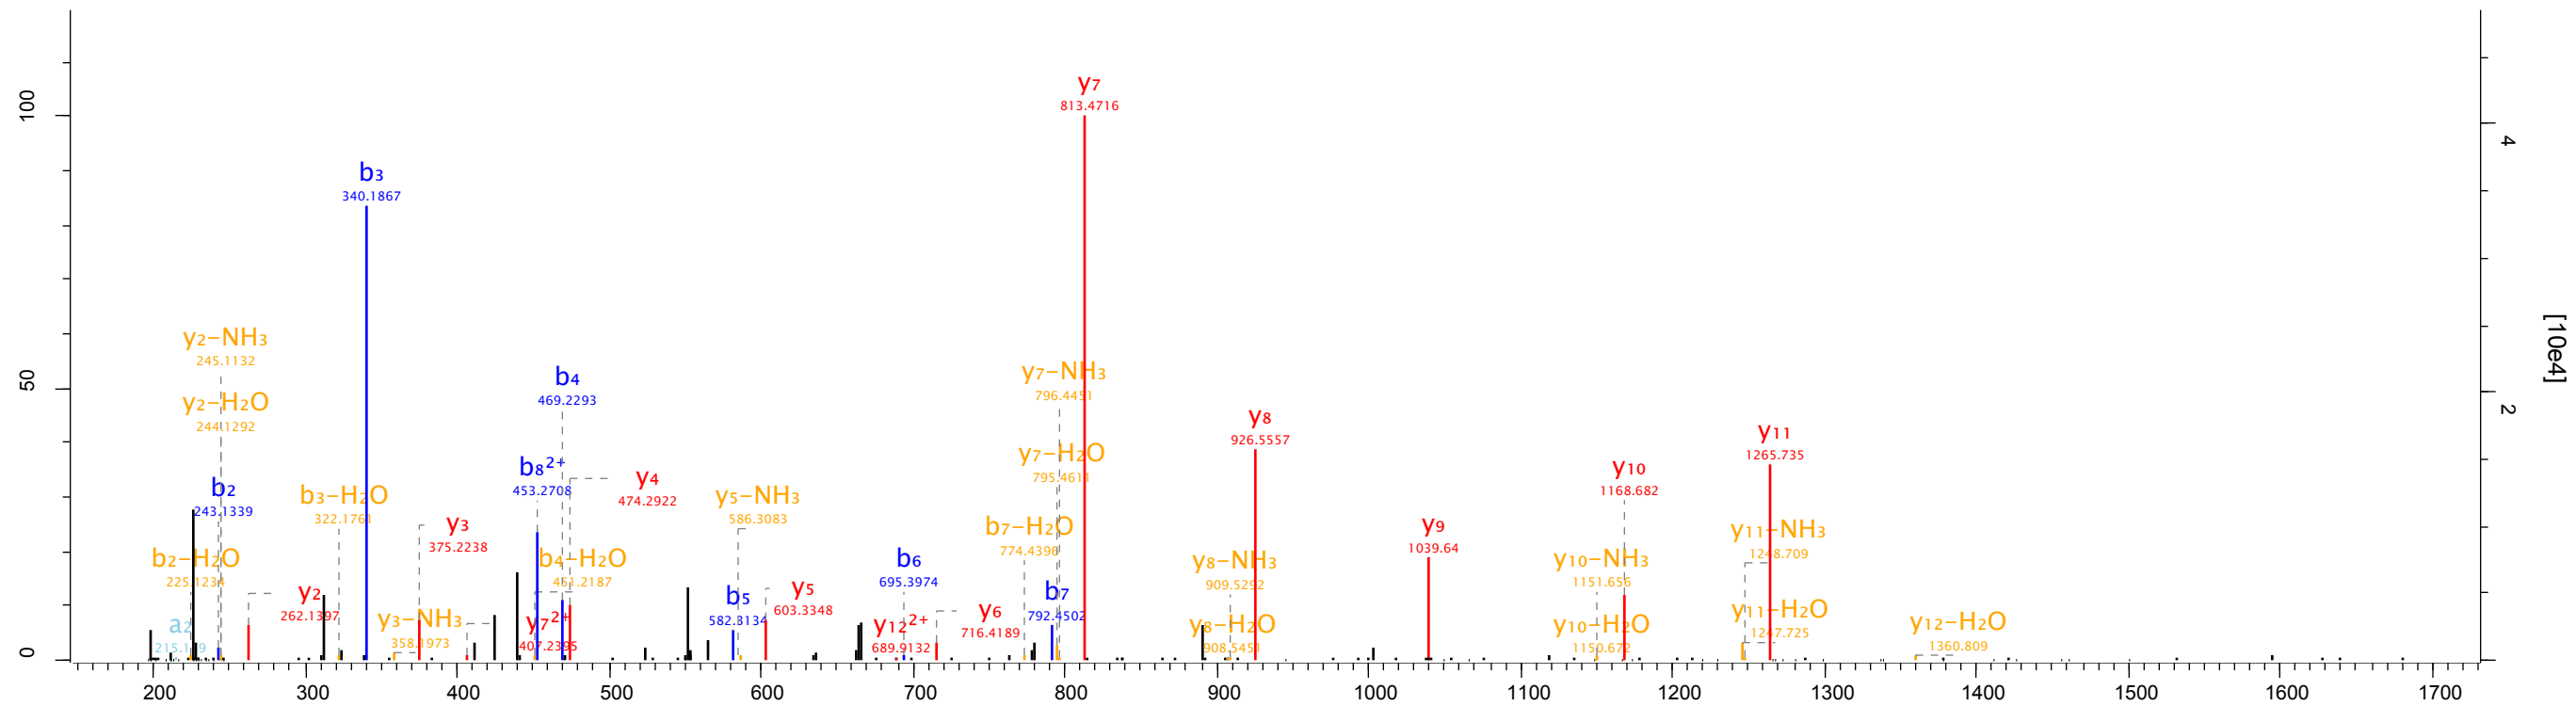



Raw file  
025pmolUPS2\_500ngY\_90min1Hz1pr\_BC1\_01\_338

| Scan  | Method   | Score  | Mass    | Gene names |
|-------|----------|--------|---------|------------|
| 10442 | TOF; CID | 195.28 | 1900.05 | GUP1       |

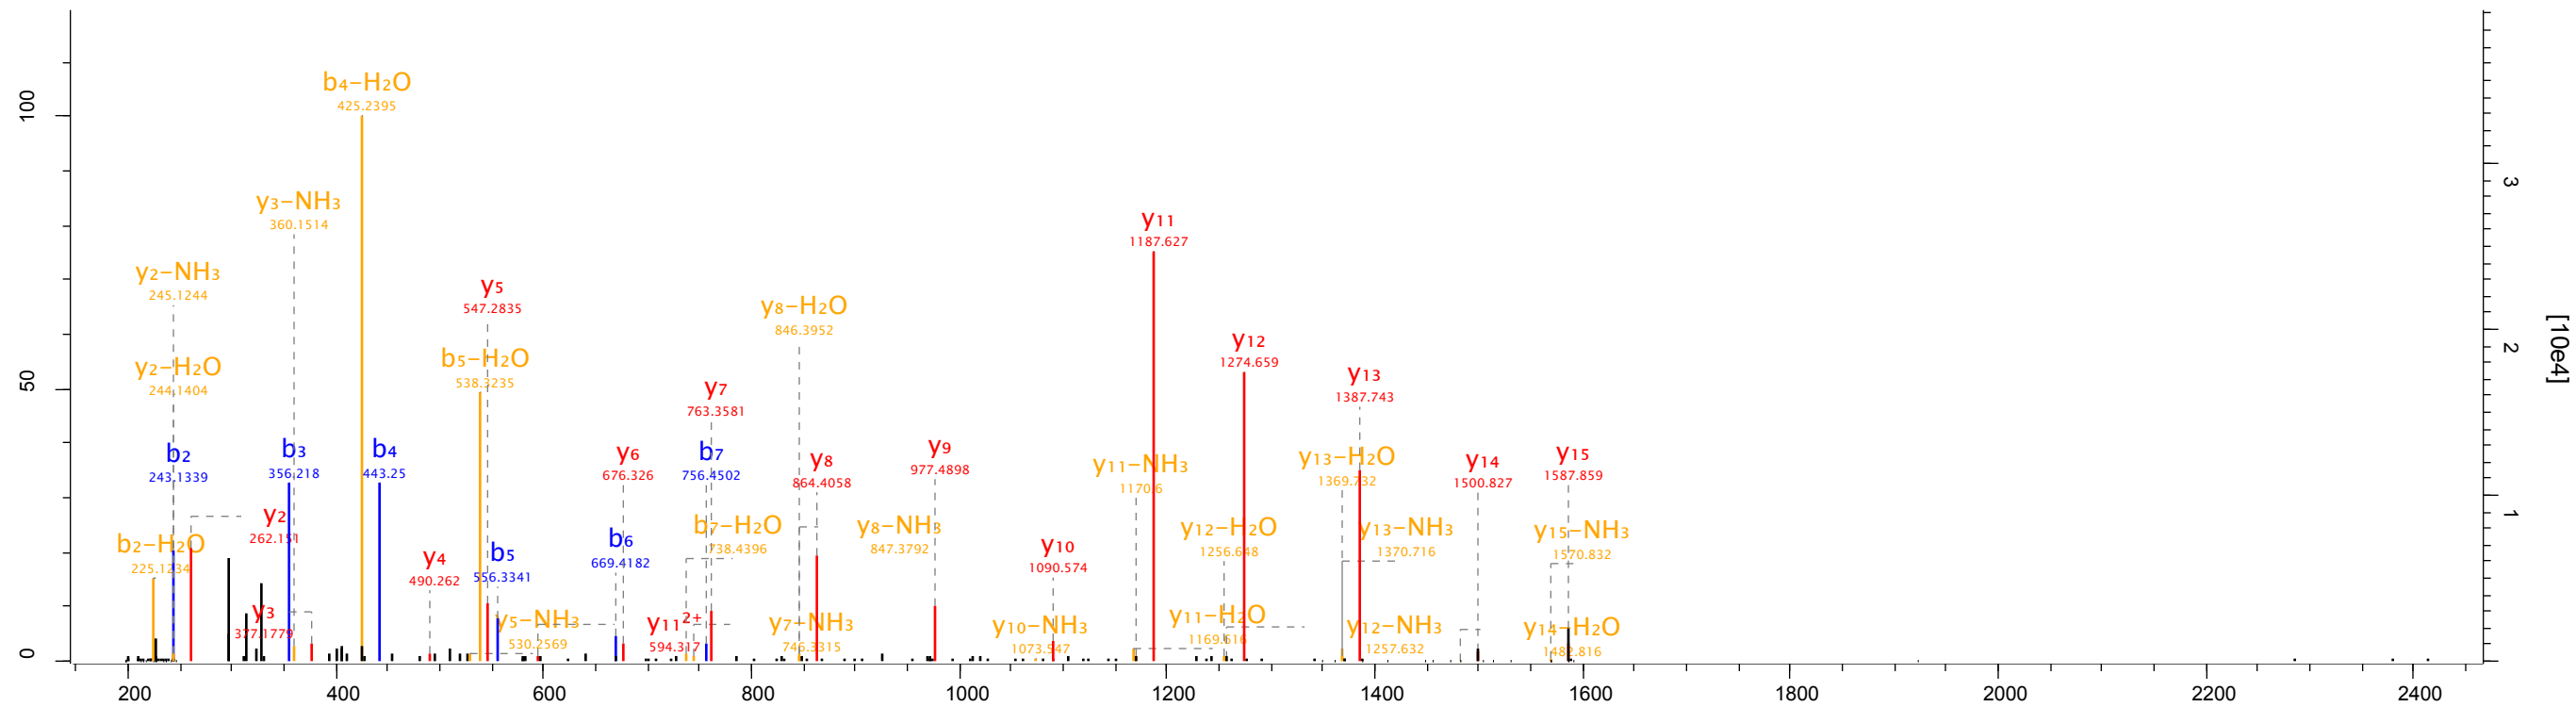

Raw file

UPS1+500ngY\_90minTop17\_BC4\_01\_358

Scan  
14907Method  
TOF; CIDScore  
73.76Mass  
1861.79Gene names  
NOP4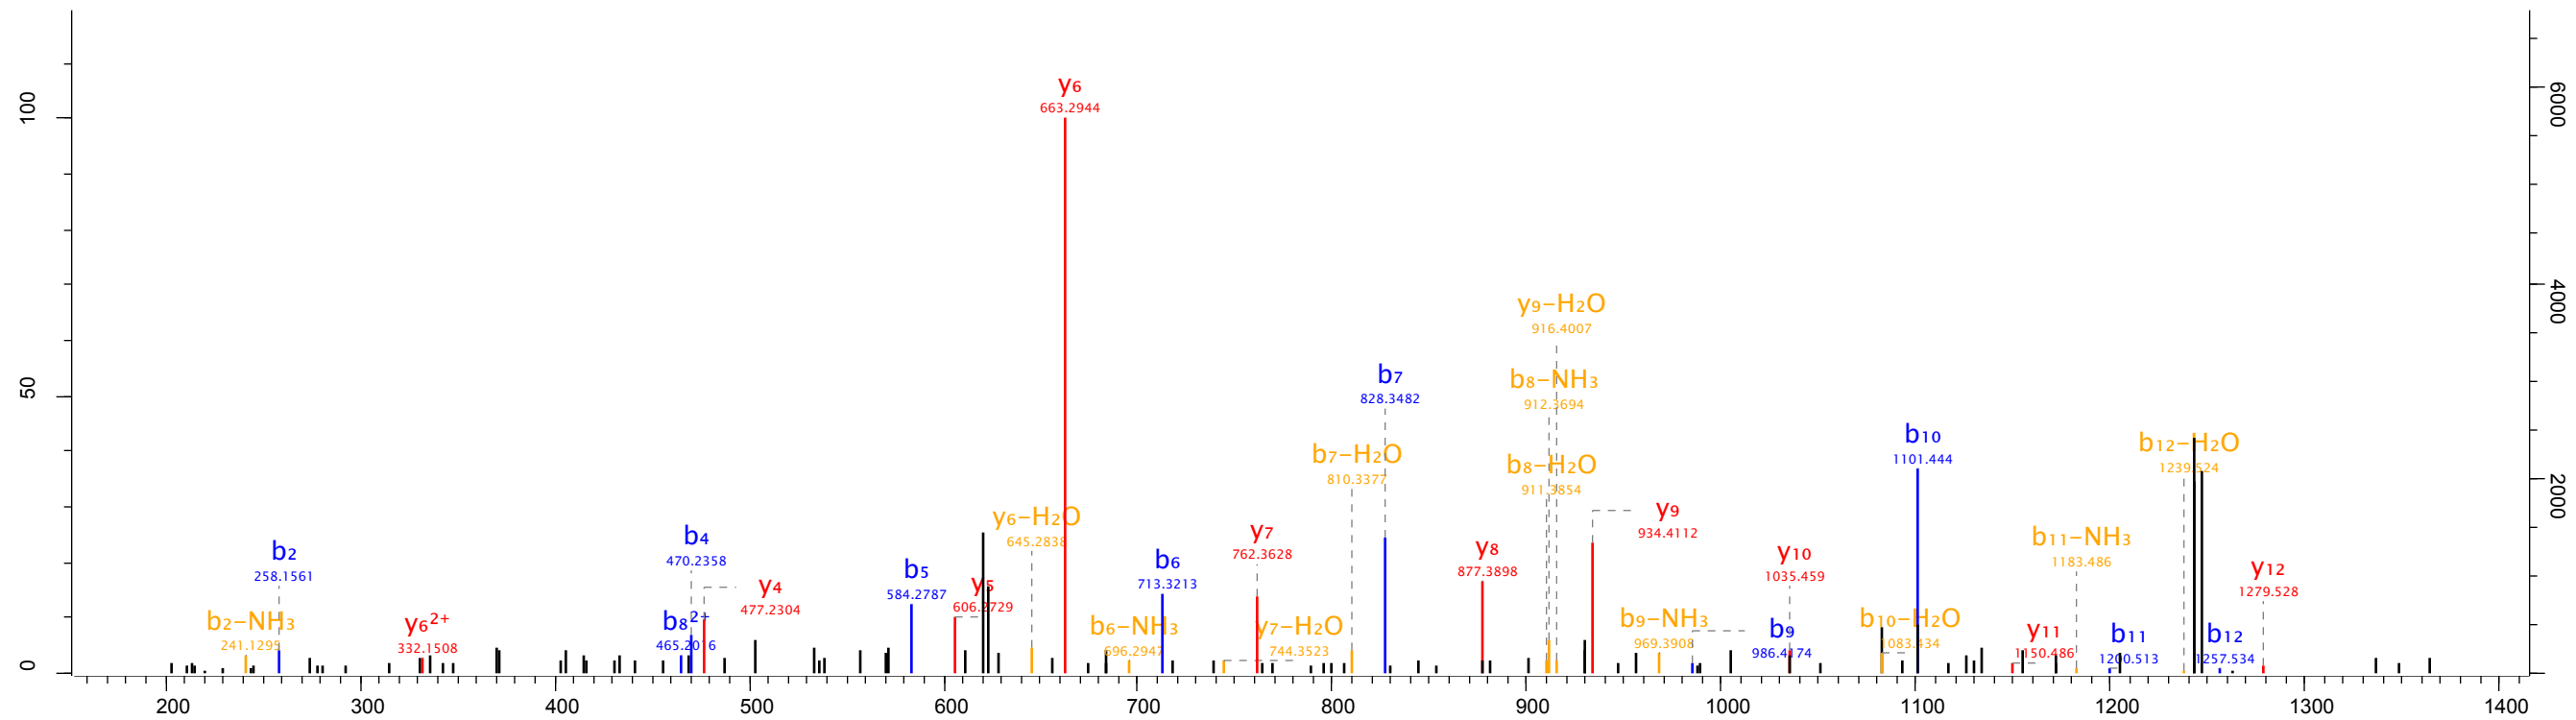

Raw file

UPS1+500ngY\_90minTop17\_BC4\_01\_358

Scan

14990

Method

TOF; CID

Score

67.23

Mass

1343.63

Gene names

IRC24

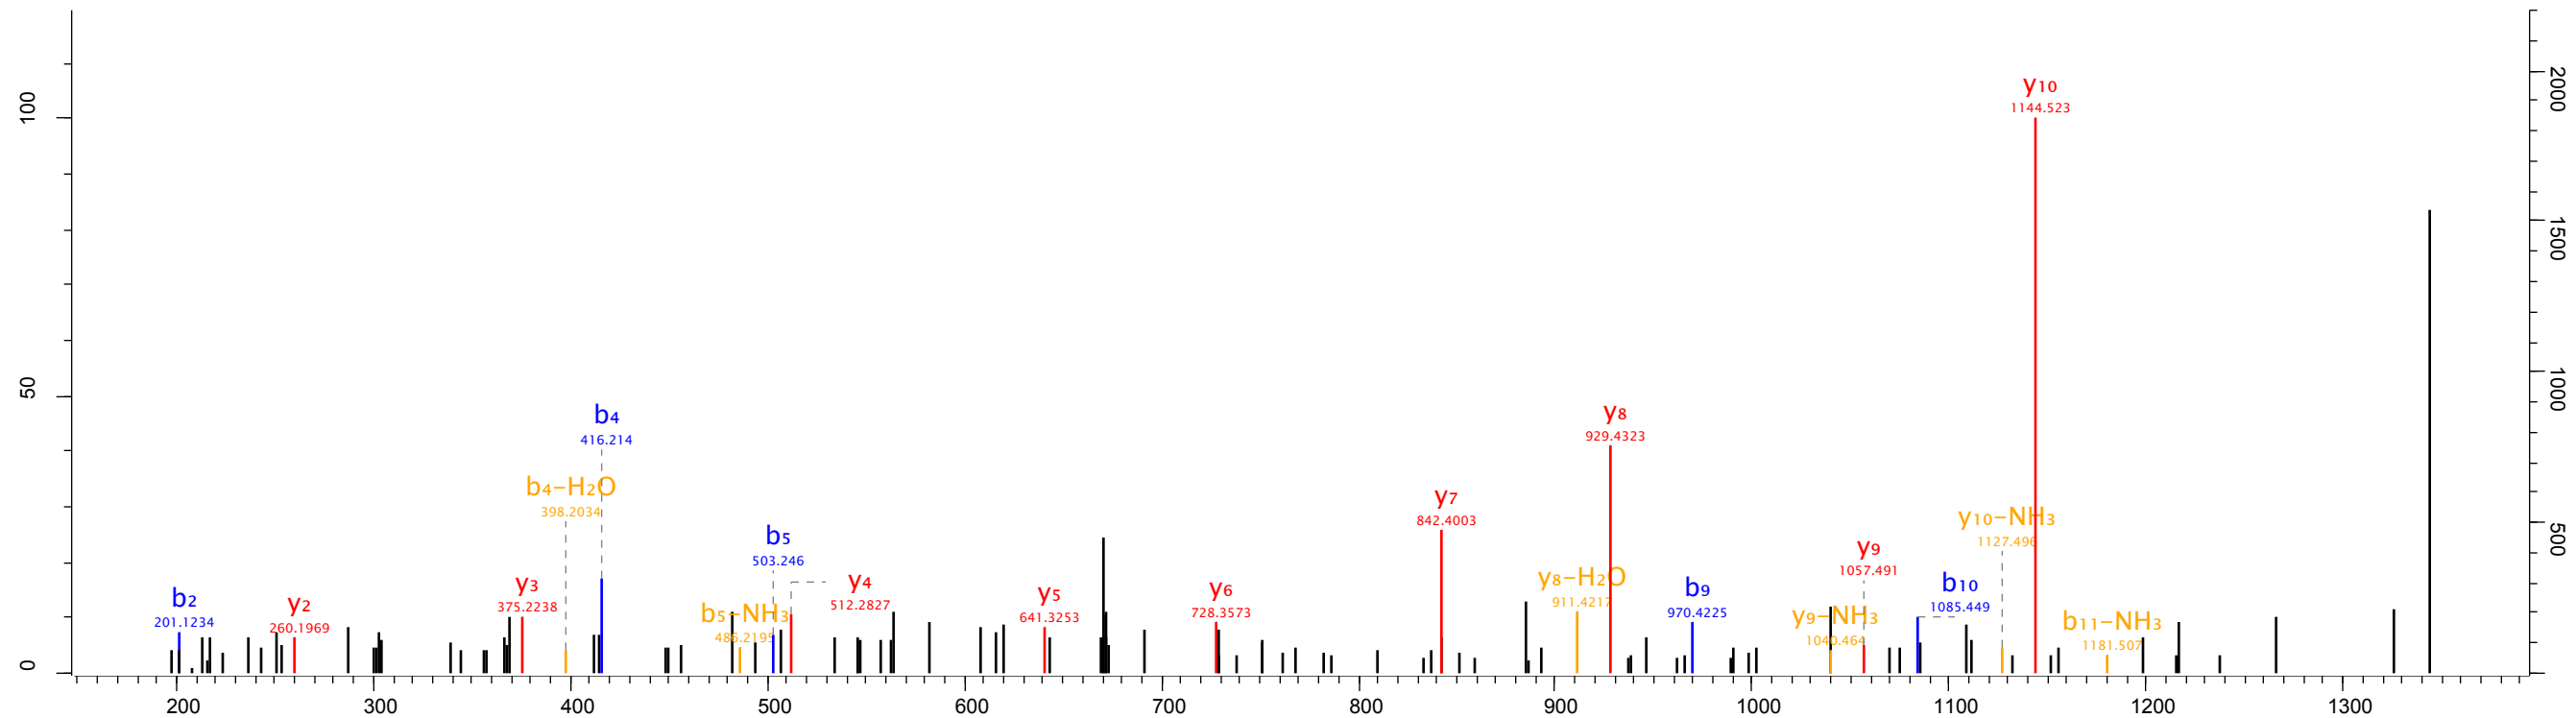

Raw file  
UPS1+500ngY\_90minTop17\_BC4\_01\_358

| Scan  | Method   | Score | Mass    | Gene names |
|-------|----------|-------|---------|------------|
| 16231 | TOF; CID | 87.08 | 1550.63 | UTP9       |

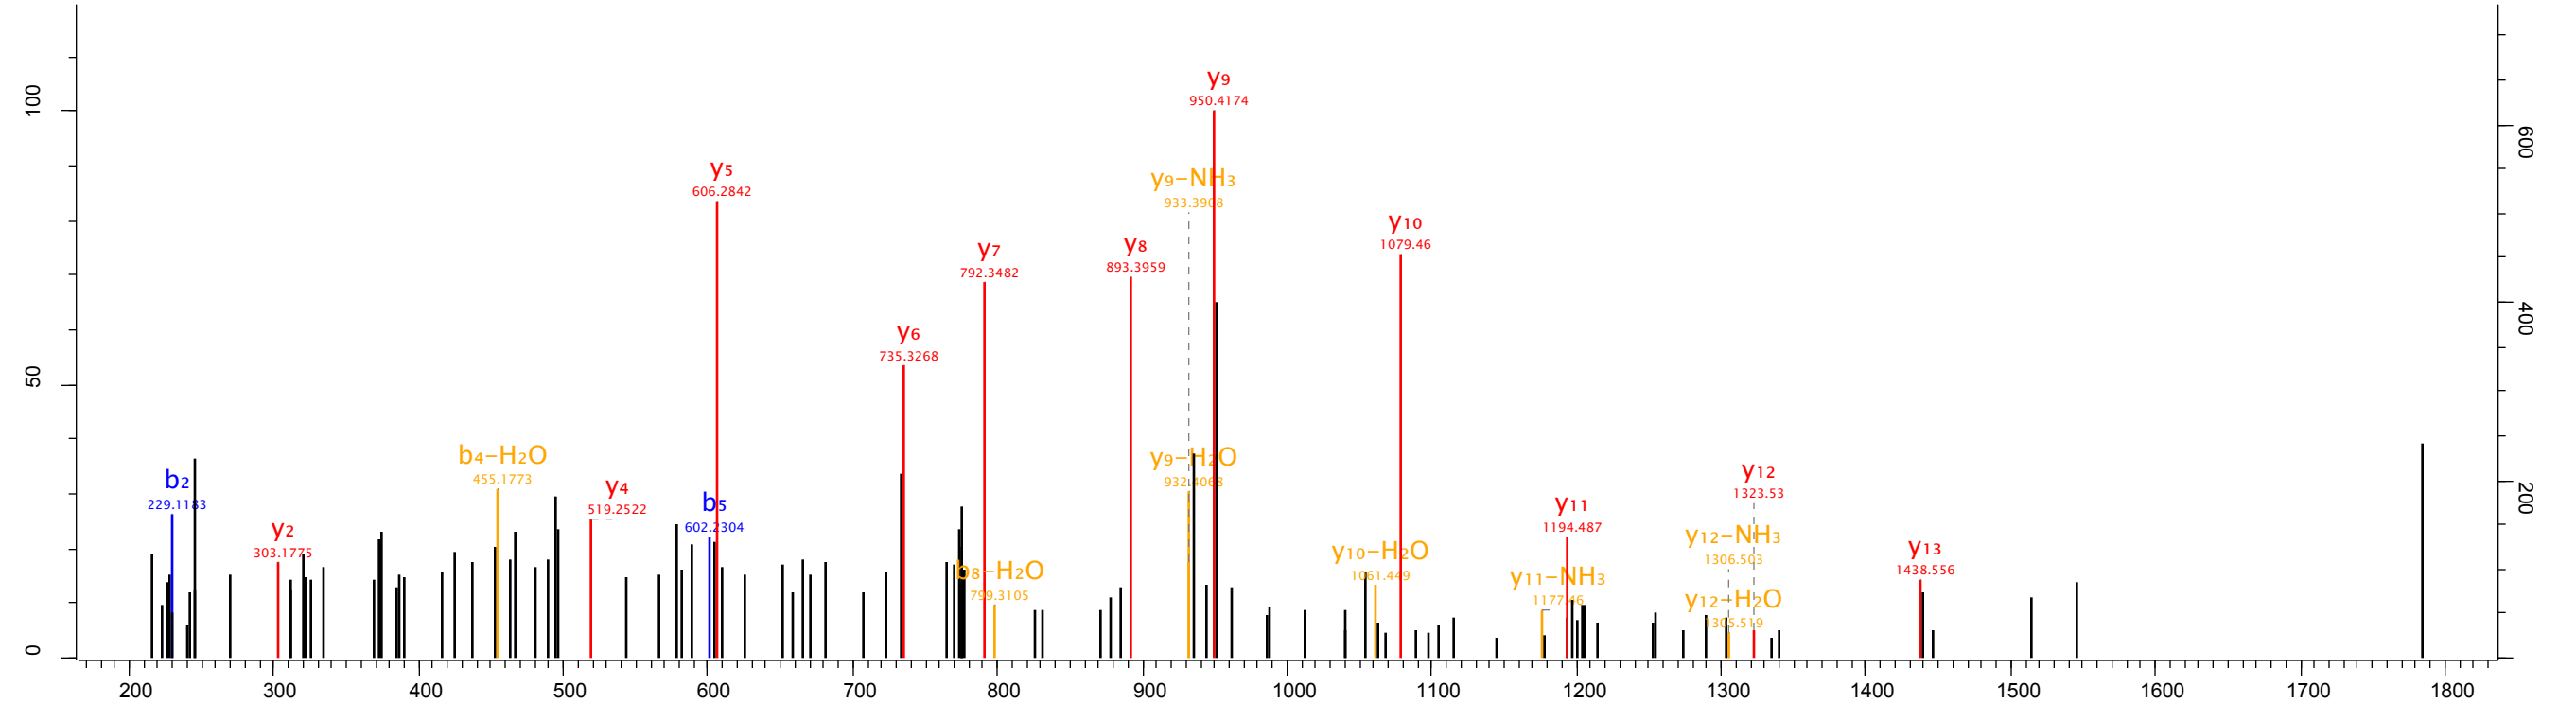

Raw file  
UPS1+500ngY\_90minTop17\_BC4\_01\_358

| Scan  | Method   | Score | Mass    | Gene names |
|-------|----------|-------|---------|------------|
| 16231 | TOF; CID | 87.08 | 1550.63 | UTP9       |



Raw file

UPS1+500ngY\_90minTop17\_BC4\_01\_358

Scan  
16421Method  
TOF; CIDScore  
62.94Mass  
1810.73Gene names  
YME2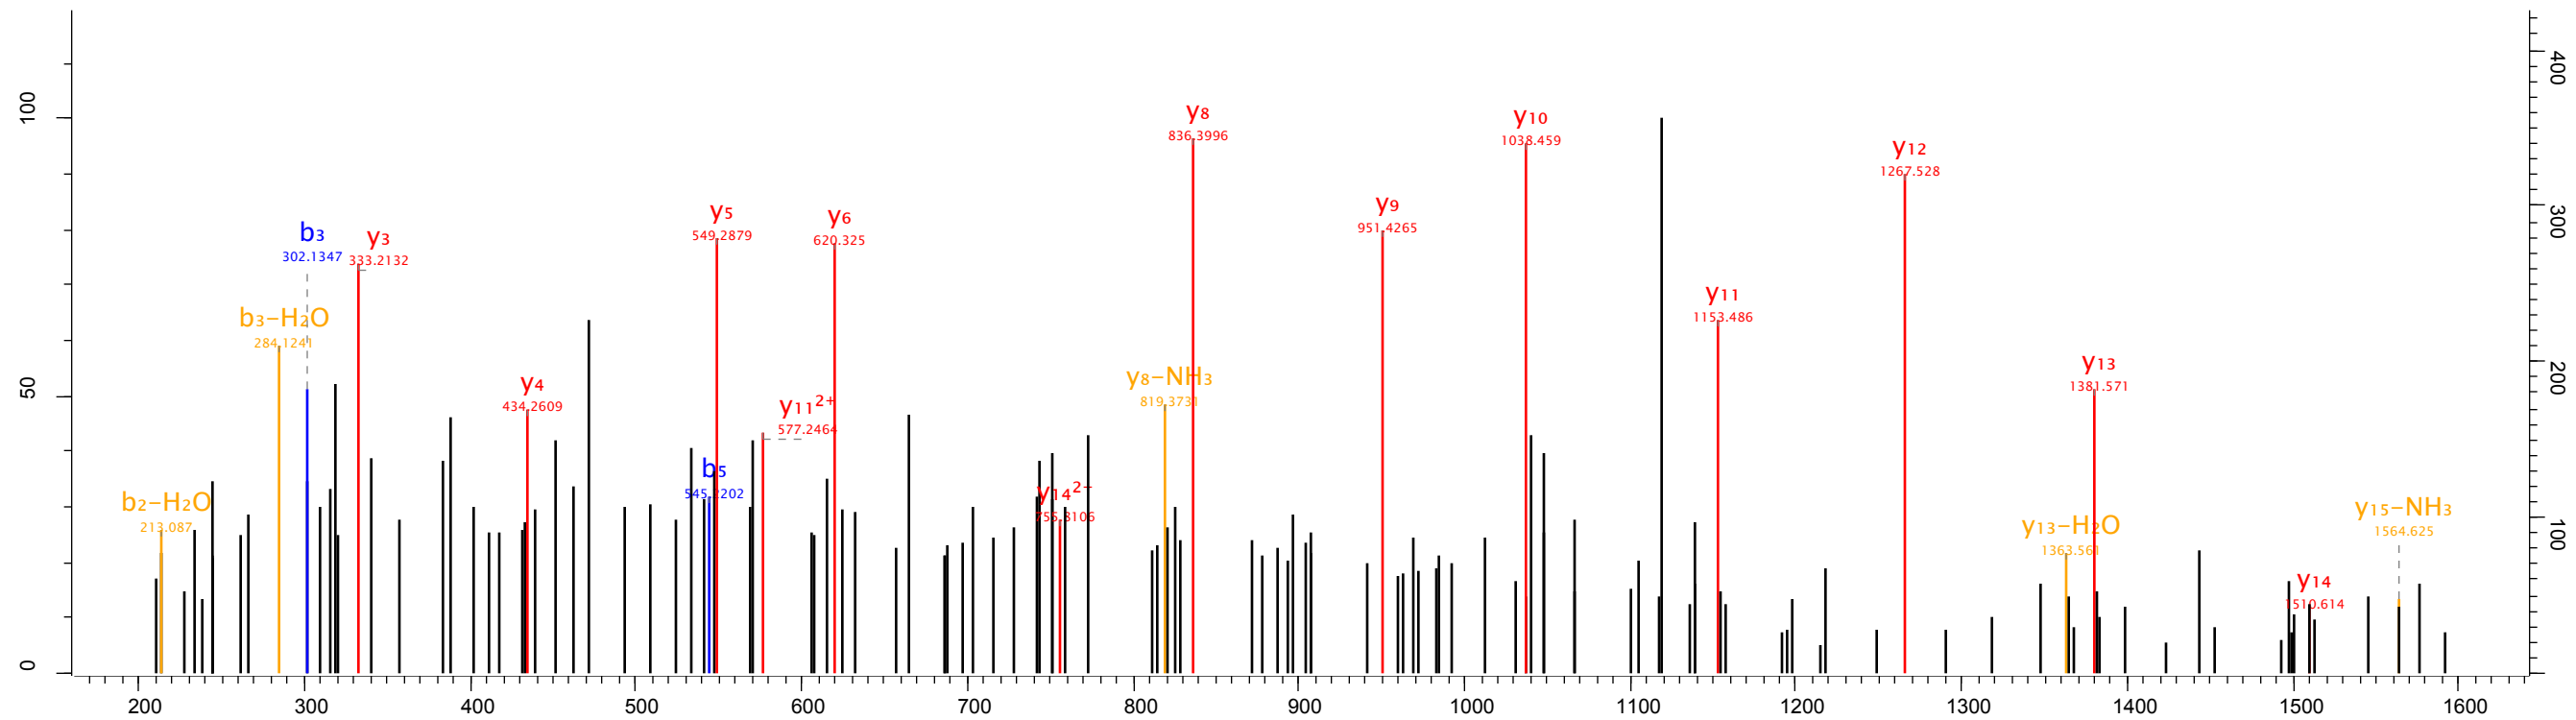

Raw file

UPS1+500ngY\_90minTop17\_BC4\_01\_358

Scan

16600

Method

TOF; CID

Score

72.21

Mass

2063.96

Gene names

RIB1

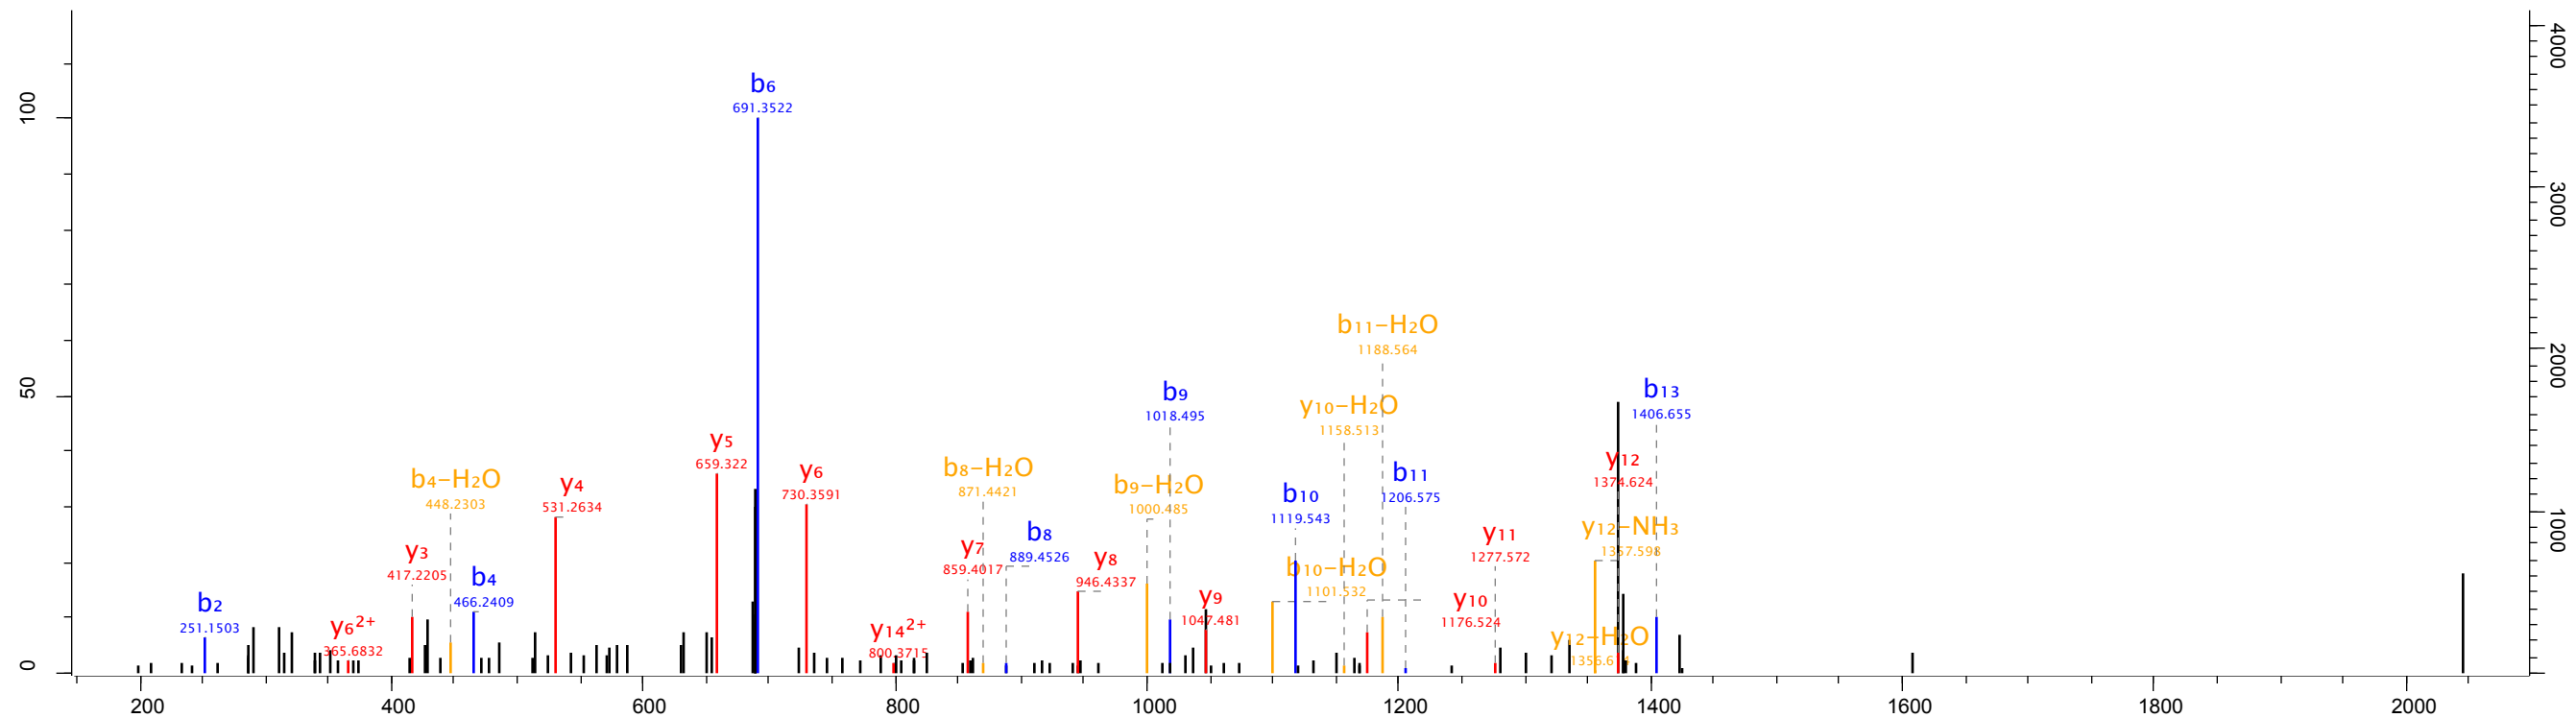

Raw file

UPS1+500ngY\_90minTop17\_BC4\_01\_358

Scan

Method

Score

Mass

Gene names

16649

TOF; CID

101.32

1519.72

SEC9

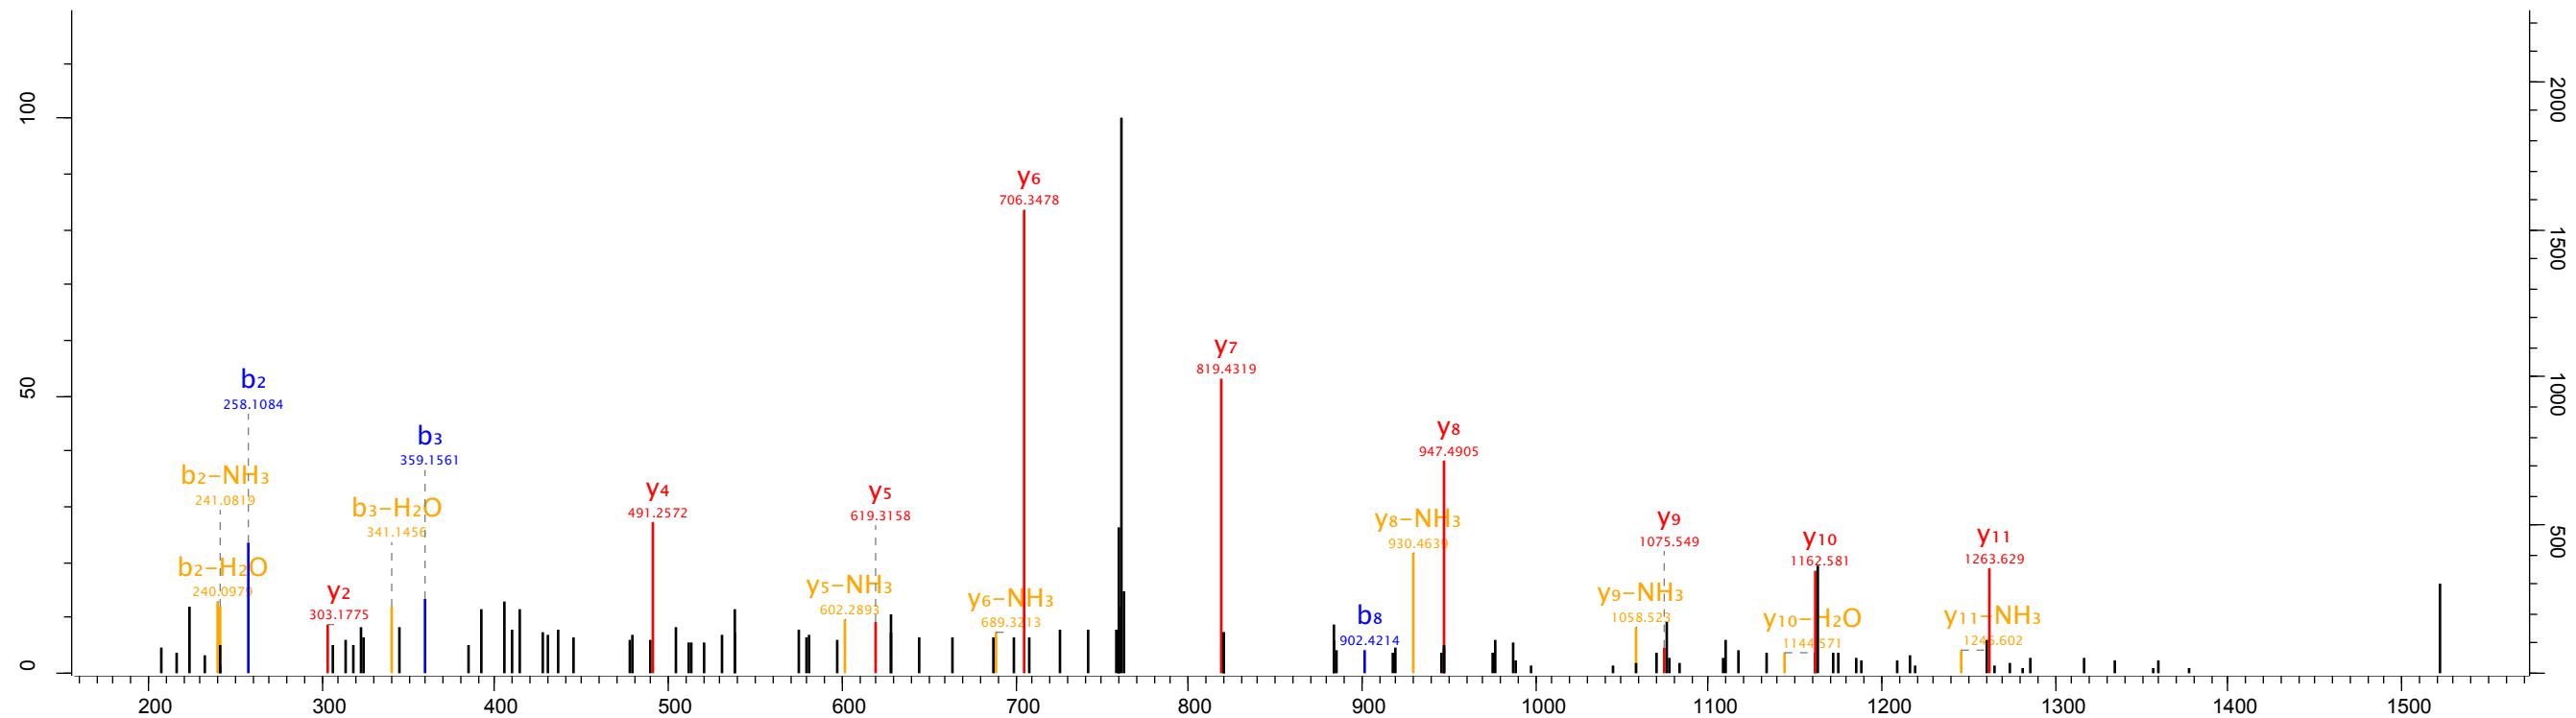



Raw file  
UPS1+500ngY\_90minTop17\_BC4\_01\_358

| Scan  | Method   | Score | Mass   | Gene names |
|-------|----------|-------|--------|------------|
| 17206 | TOF; CID | 58.78 | 960.46 | ESF1       |

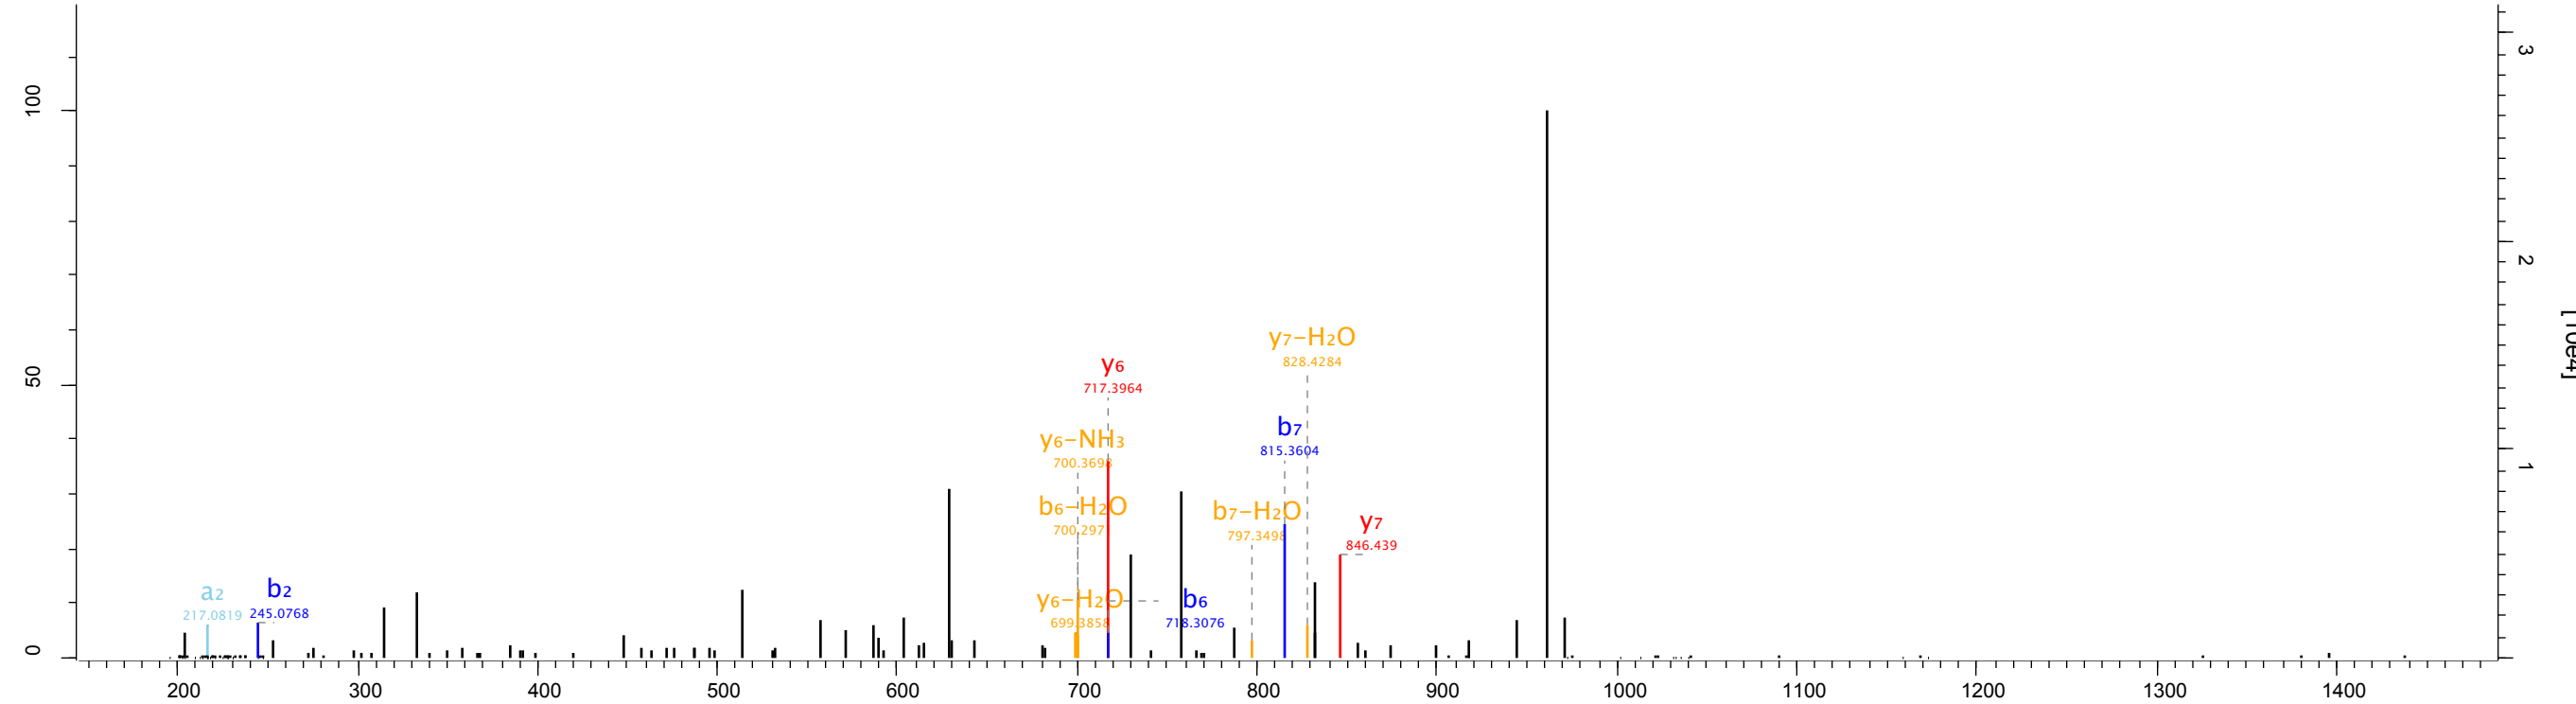

Raw file  
UPS1+500ngY\_90minTop17\_BC4\_01\_358

Scan 17451 Method TOF; CID Score 49.3 Mass 1135.53 Gene names CEG1

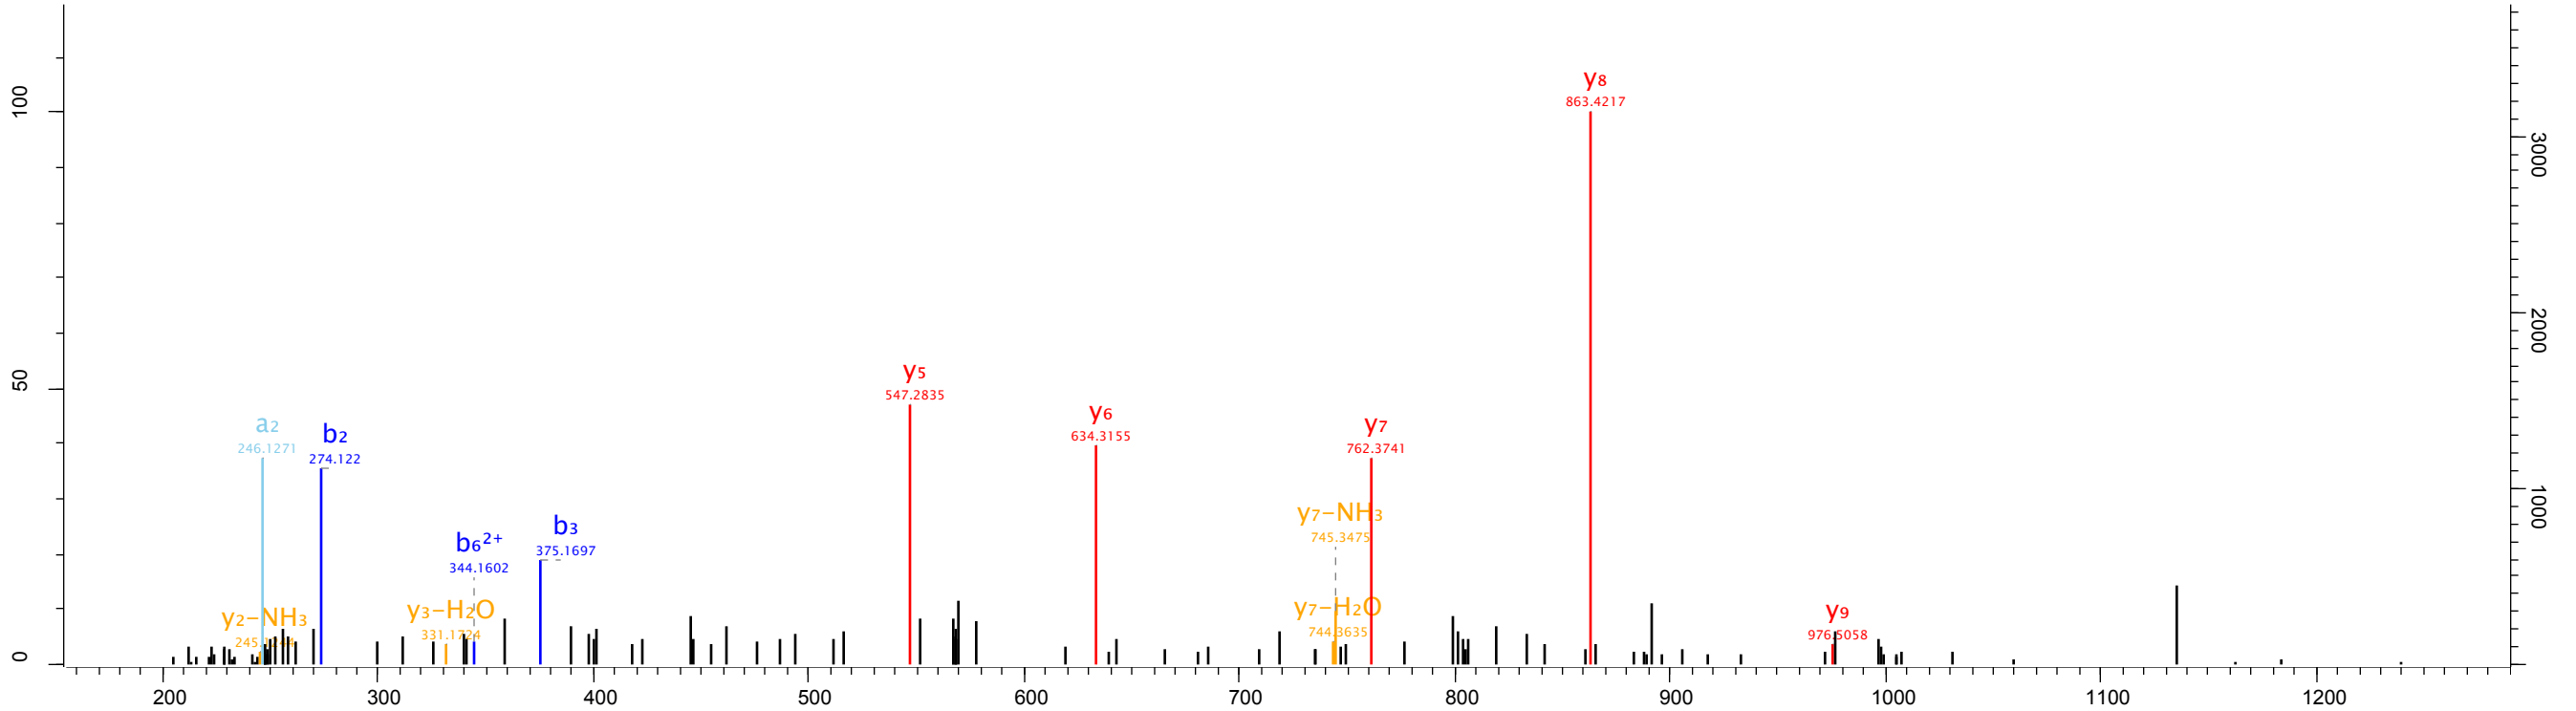

Raw file

UPS1+500ngY\_90minTop17\_BC4\_01\_358

| Scan  | Method   | Score | Mass    | Gene names |
|-------|----------|-------|---------|------------|
| 17674 | TOF; CID | 56.12 | 1655.76 | PEP8       |

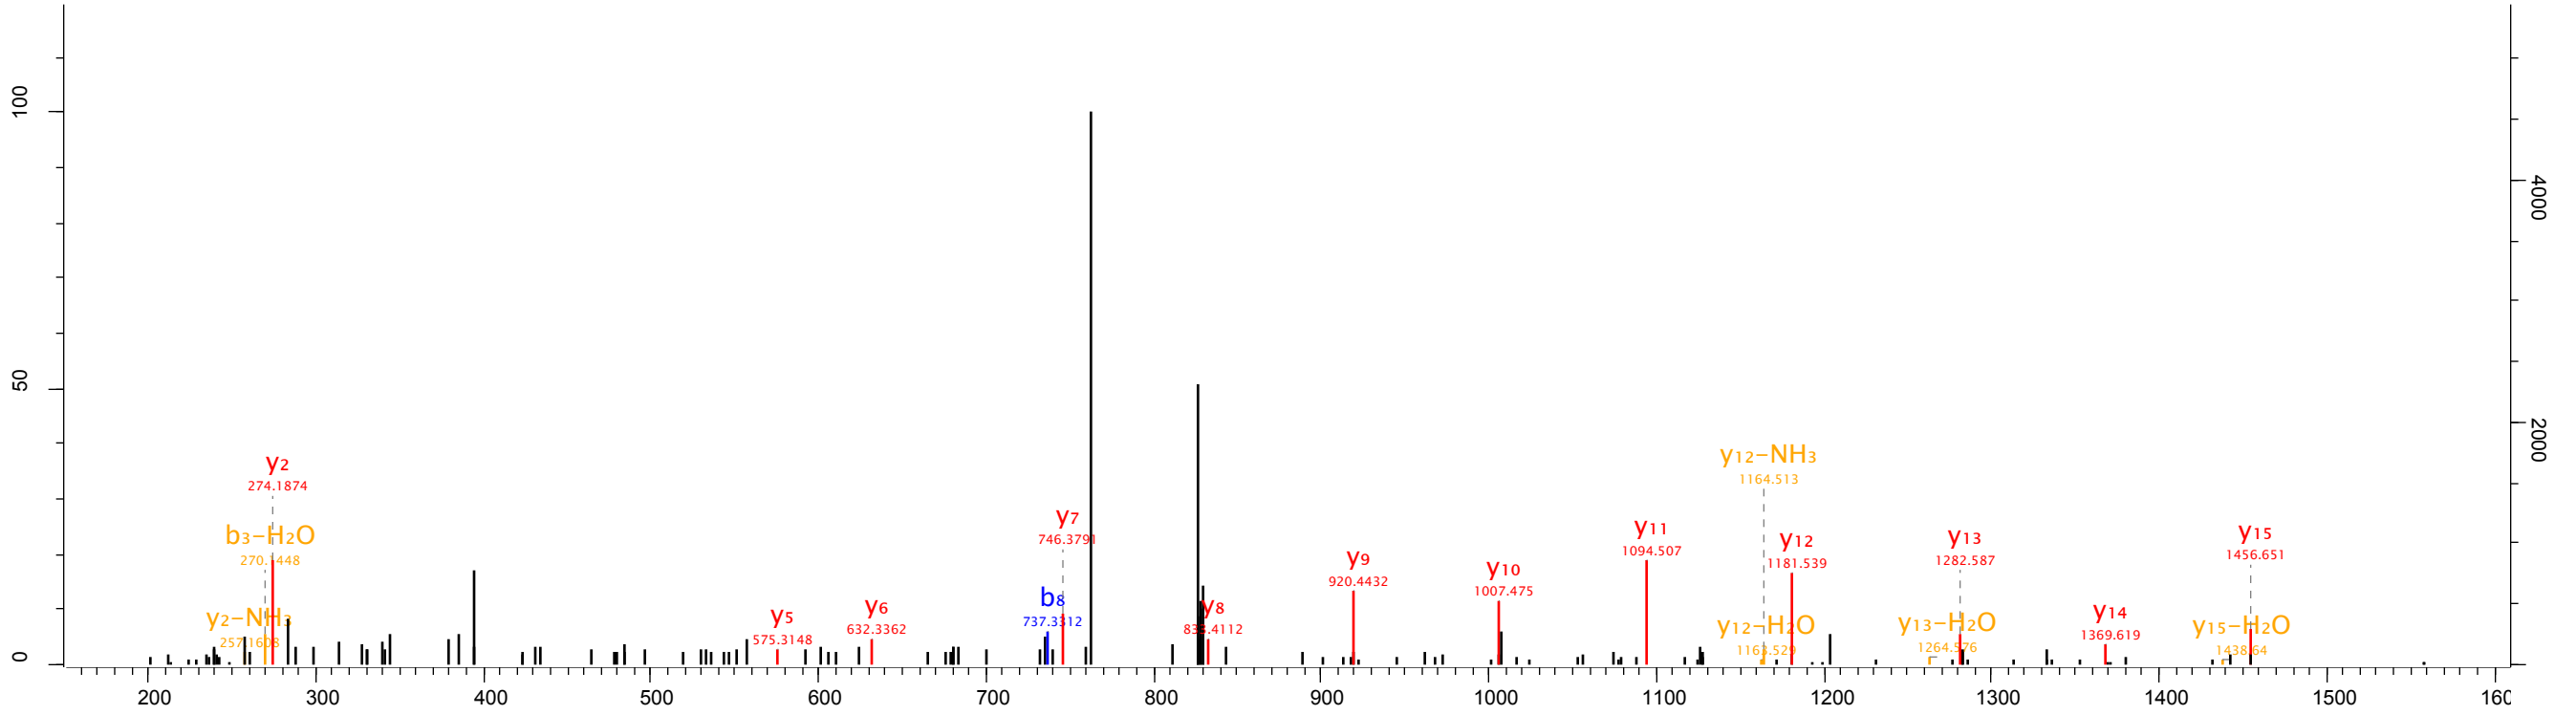

Raw file

UPS1+500ngY\_90minTop17\_BC4\_01\_358

Scan  
17890Method  
TOF; CIDScore  
71.15Mass  
2262.86Gene names  
HAL5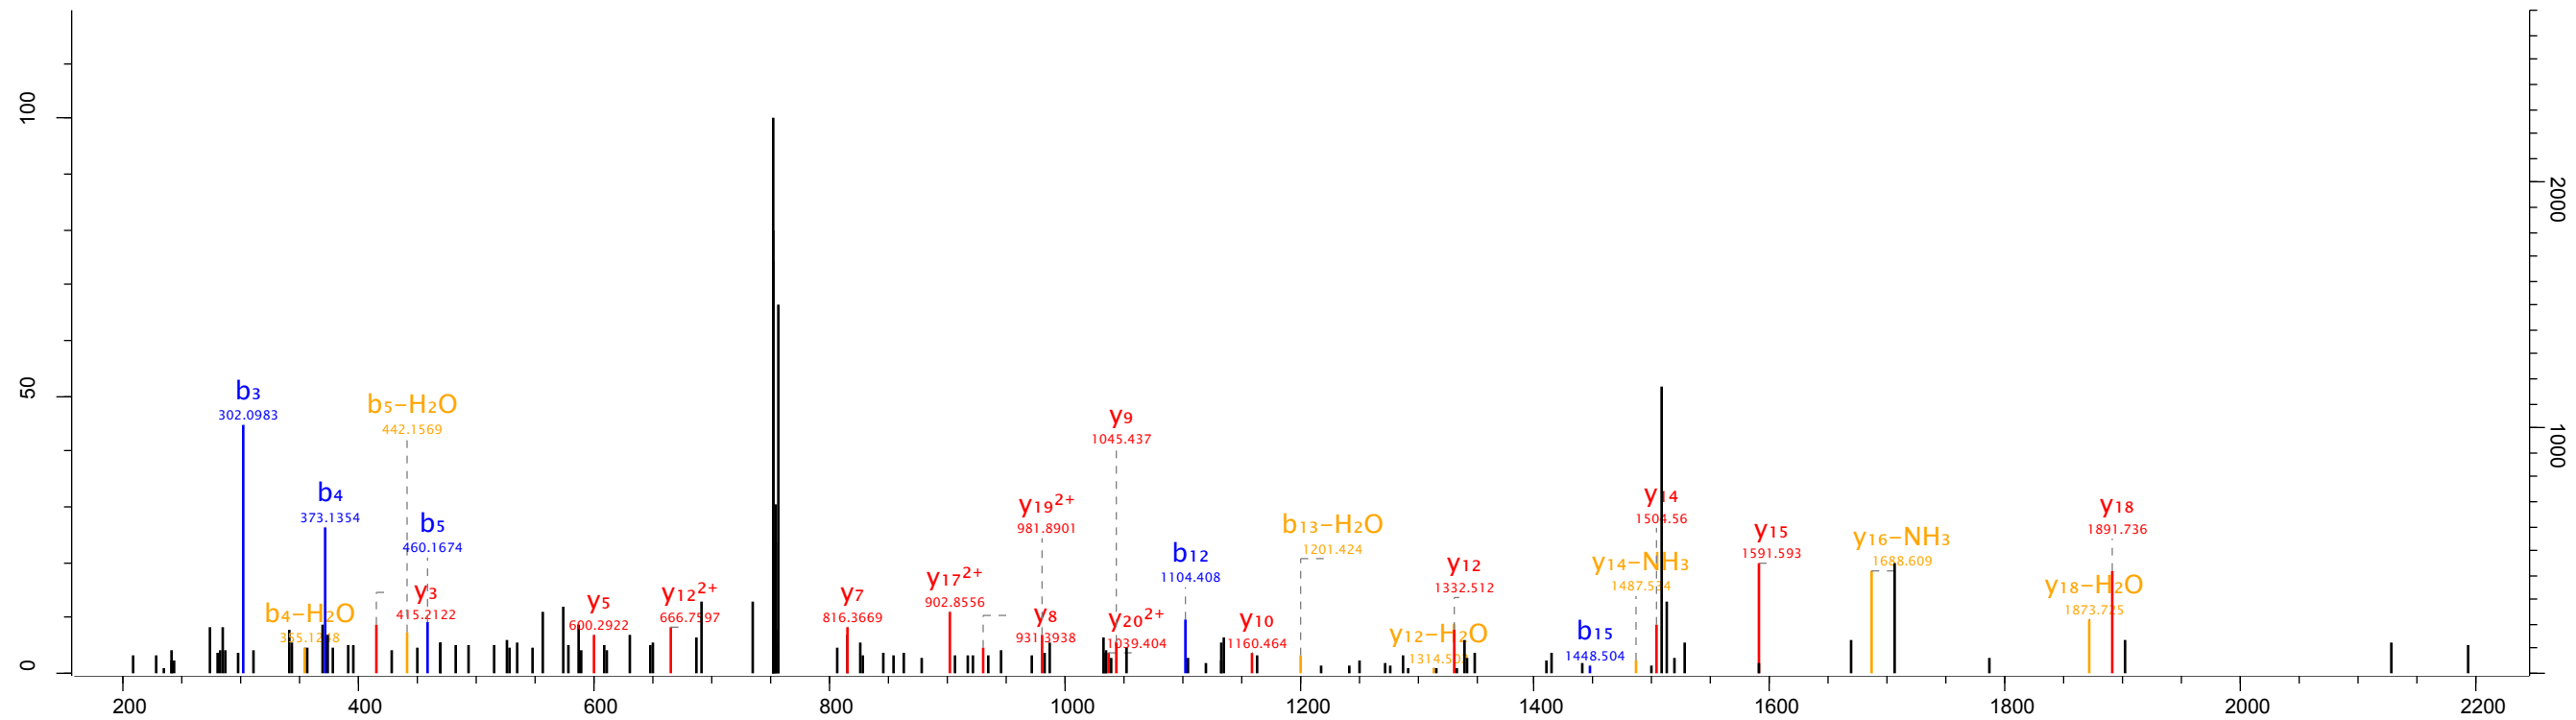

Raw file

UPS1+500ngY\_90minTop17\_BC4\_01\_358

| Scan  | Method   | Score | Mass    | Gene names |
|-------|----------|-------|---------|------------|
| 17936 | TOF; CID | 58.17 | 1134.59 | CEX1       |

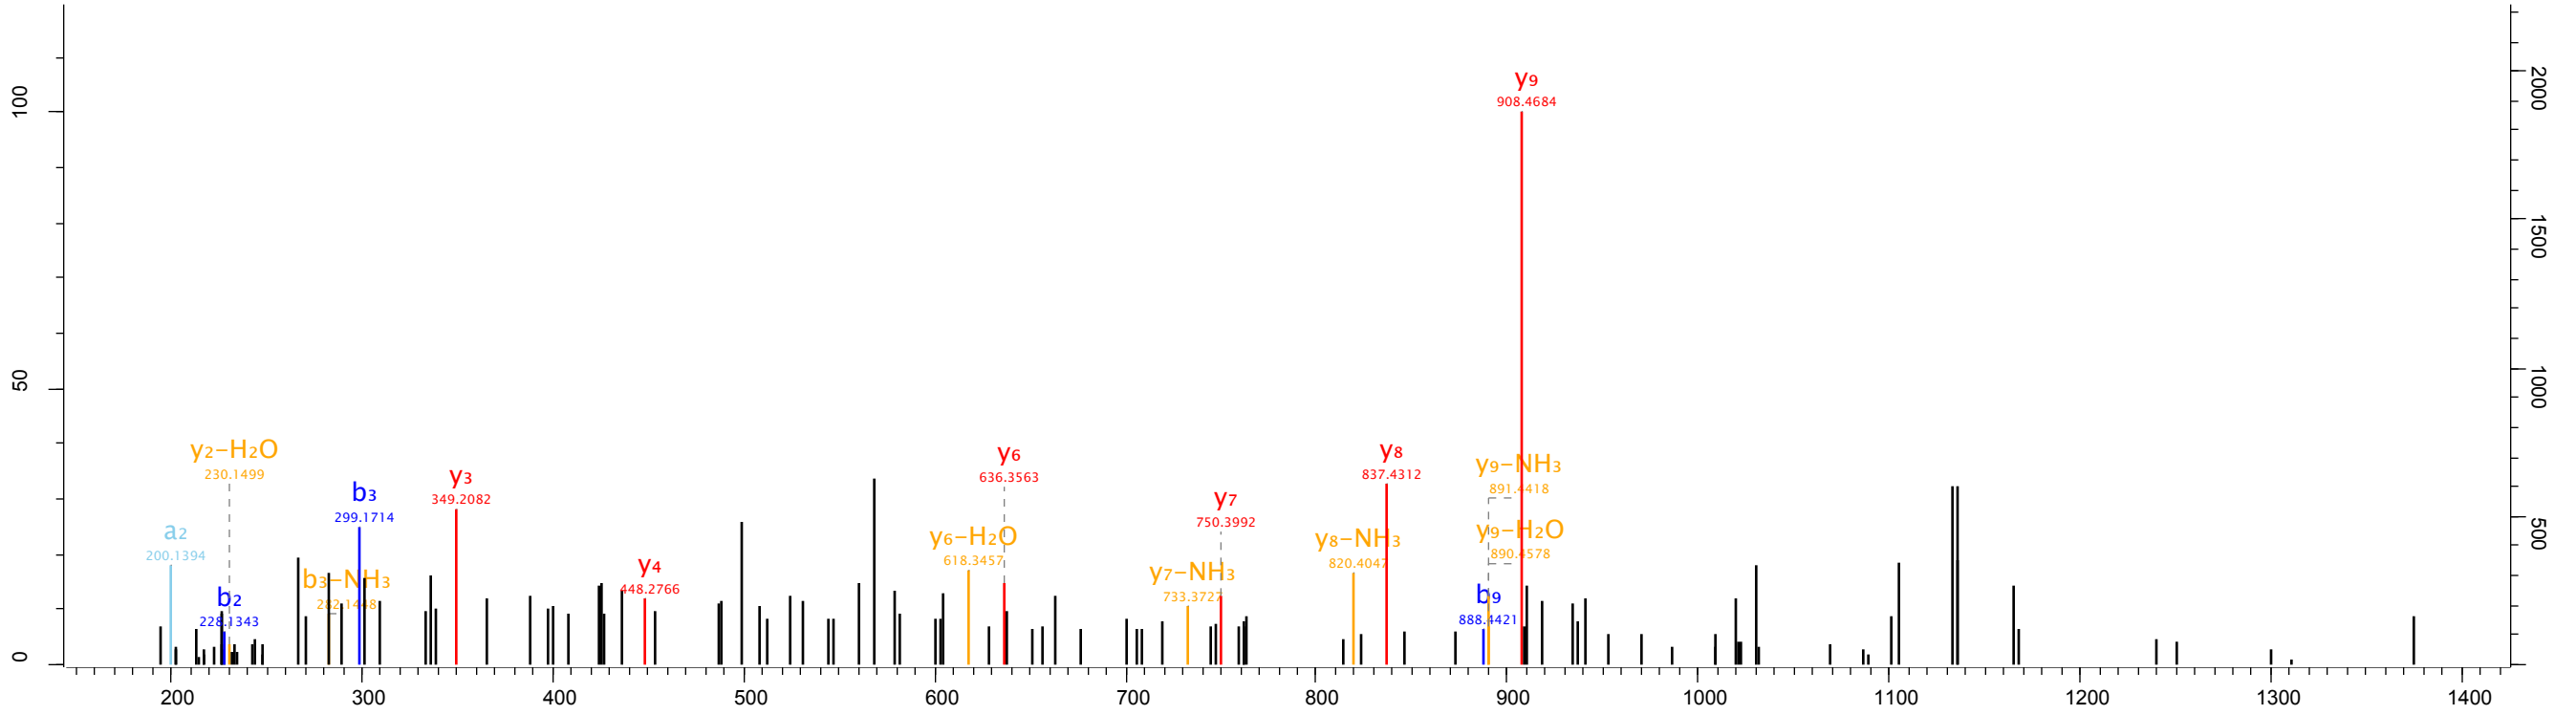

Raw file  
UPS1+500ngY\_90minTop17\_BC4\_01\_358

| Scan  | Method   | Score | Mass    | Gene names |
|-------|----------|-------|---------|------------|
| 18291 | TOF; CID | 92.61 | 1315.63 | SML1       |

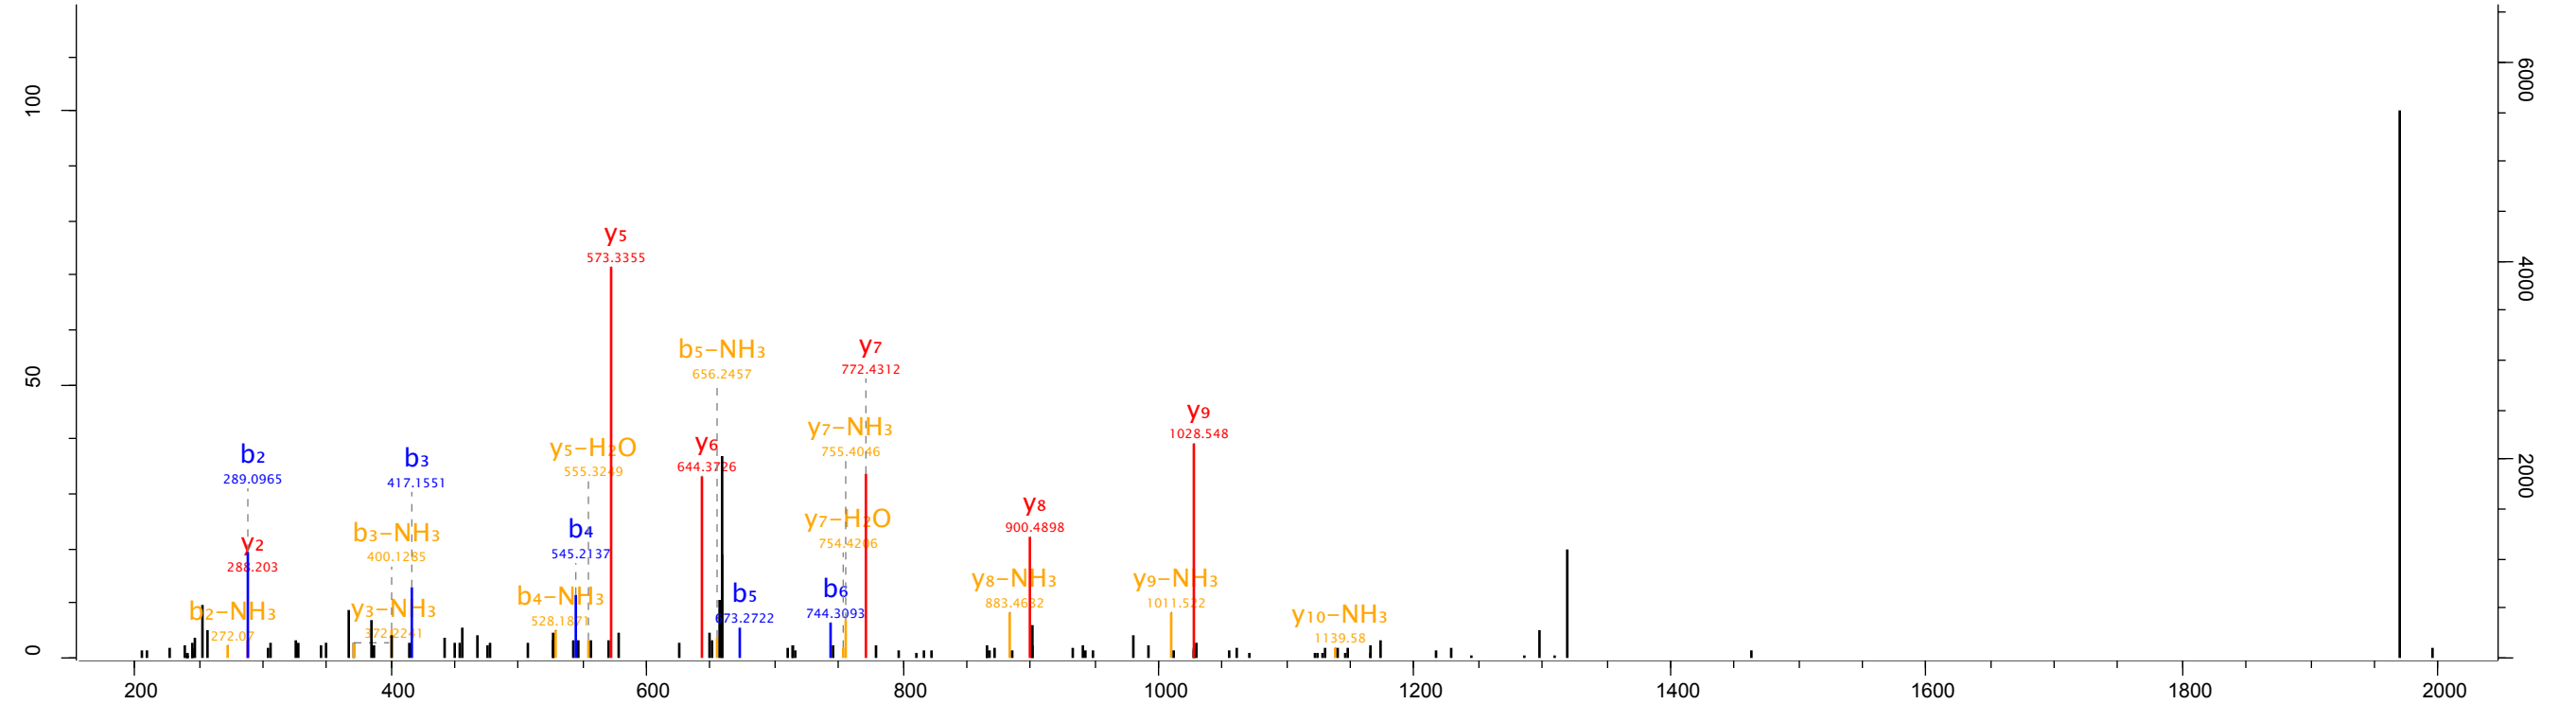

Raw file  
UPS1+500ngY\_90minTop17\_BC4\_01\_358

Scan 18390 Method TOF; CID Score 83.18 Mass 1228.51 Gene names LSB5

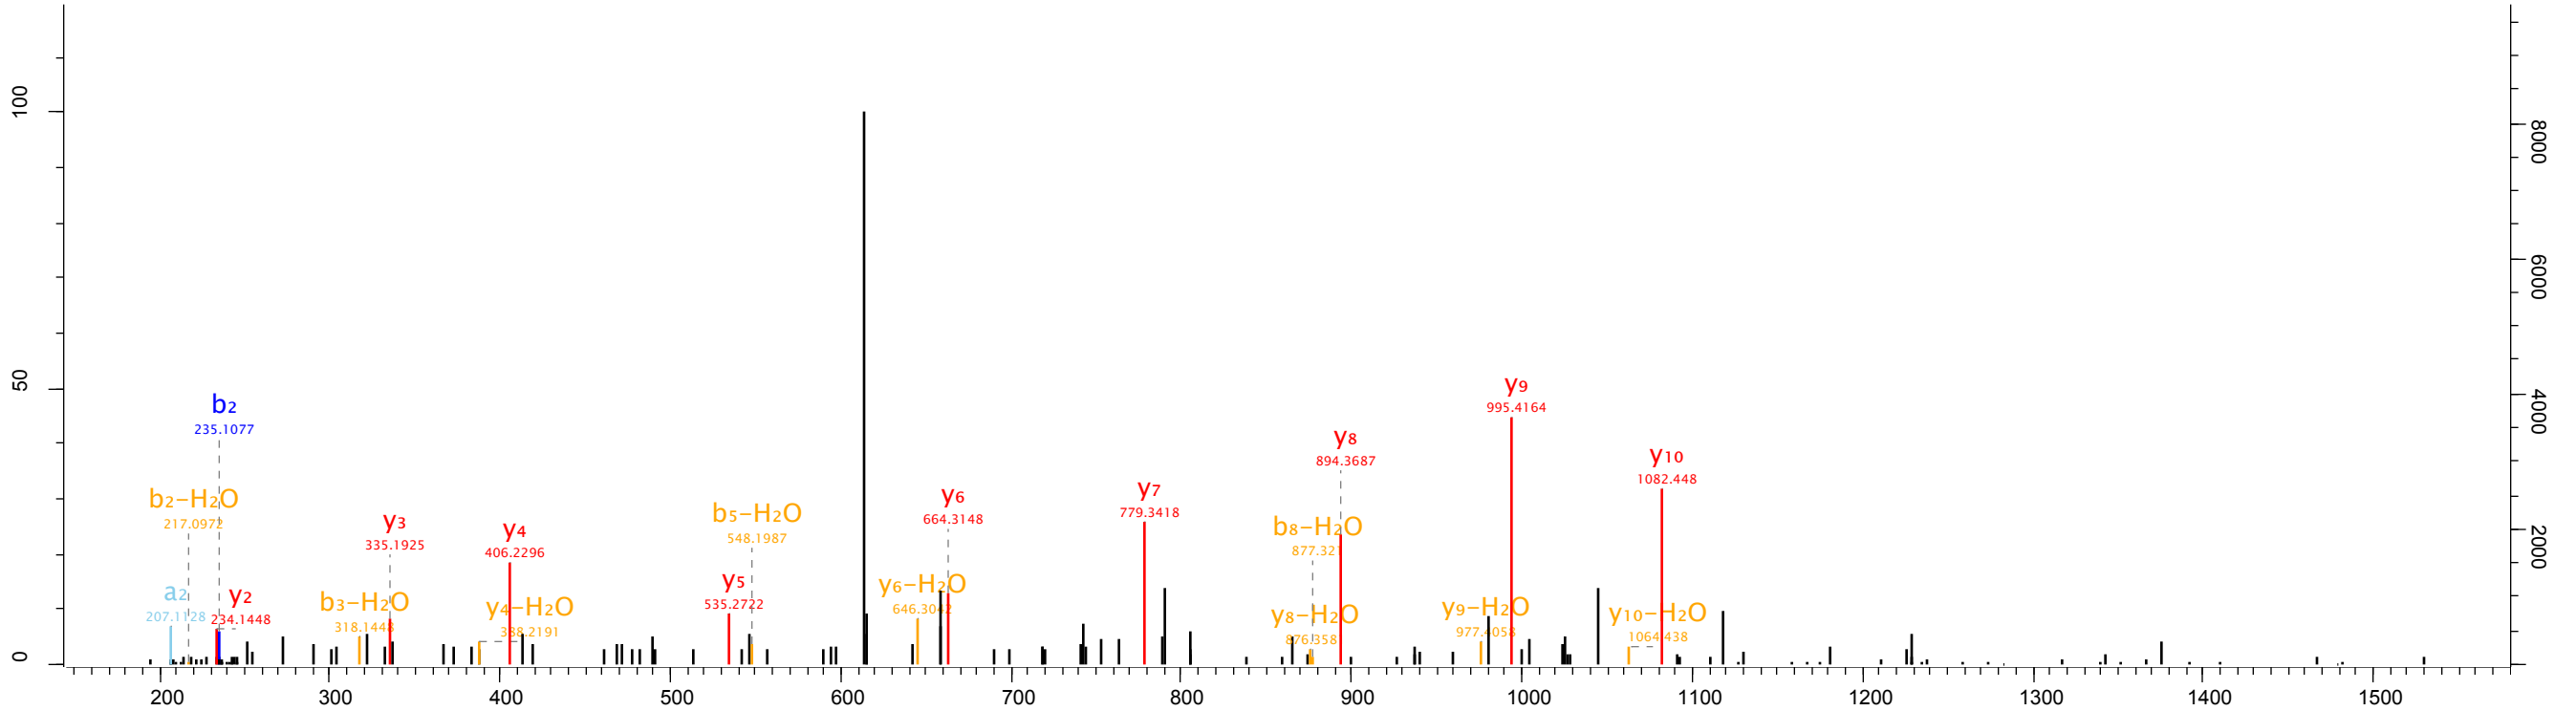

Raw file

UPS1+500ngY\_90minTop17\_BC4\_01\_358

| Scan  | Method   | Score | Mass    | Gene names |
|-------|----------|-------|---------|------------|
| 18413 | TOF; CID | 53.26 | 1536.74 | CMP2       |

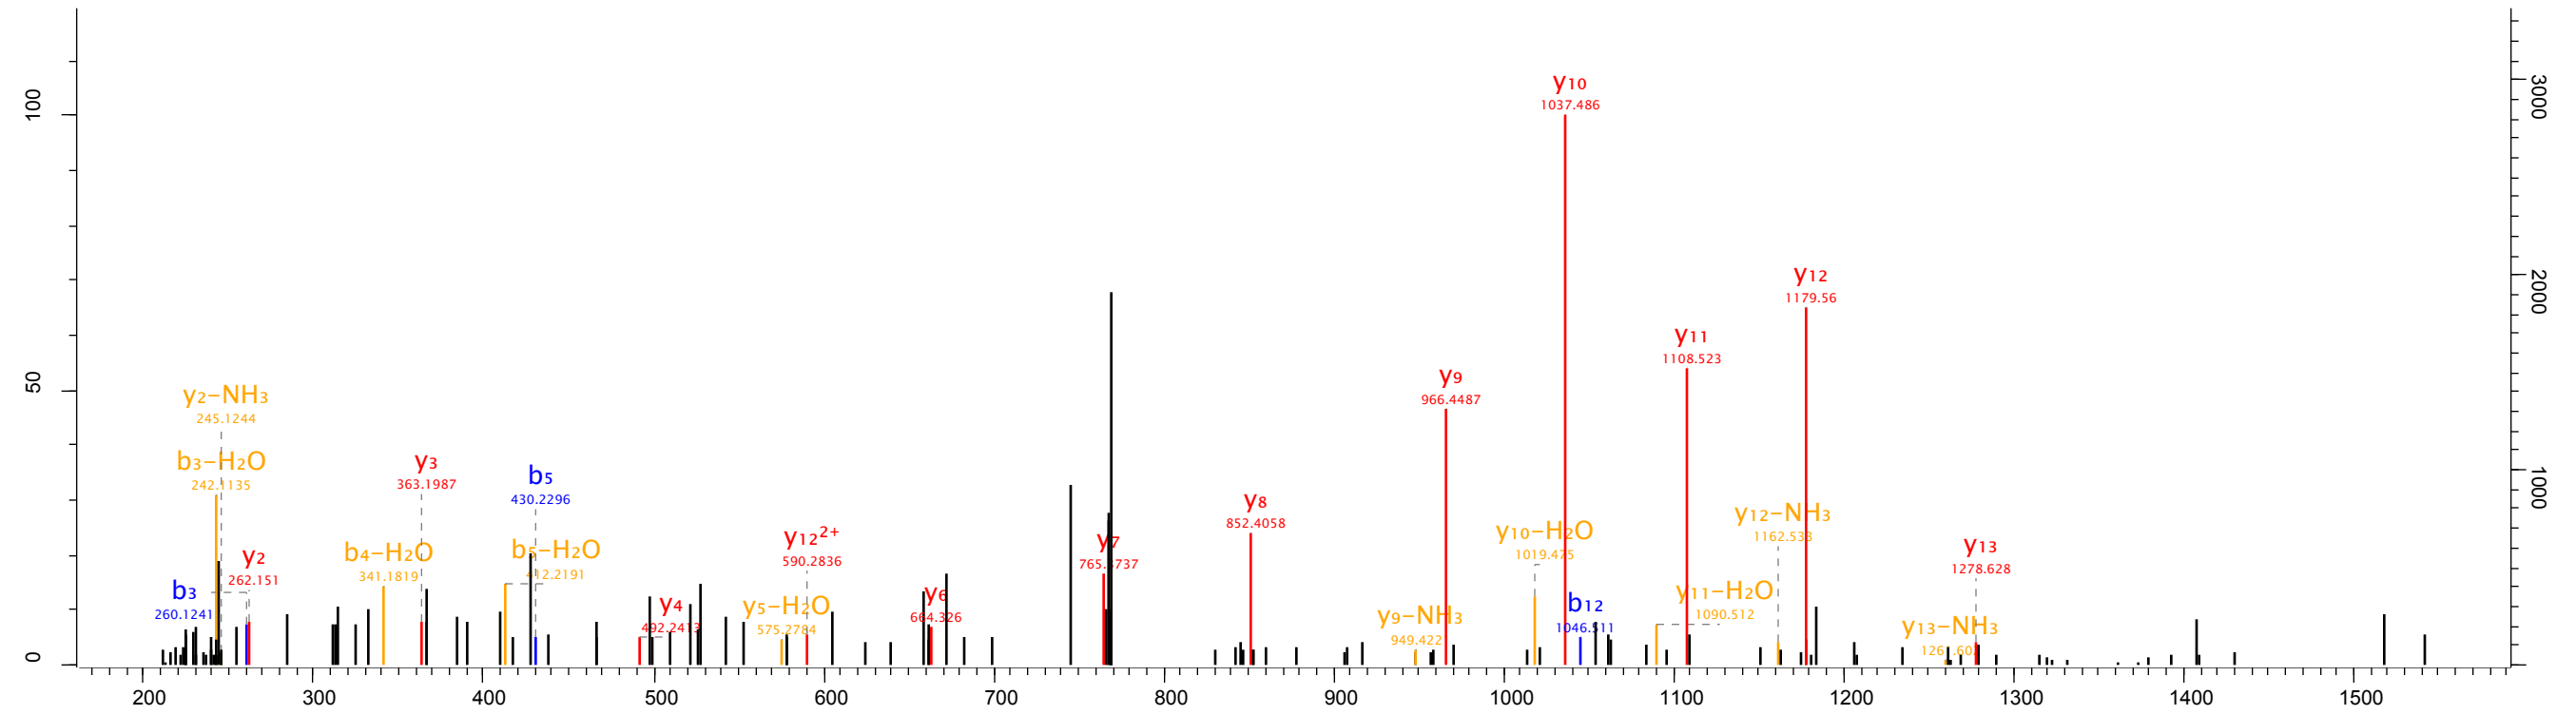



Raw file

UPS1+500ngY\_90minTop17\_BC4\_01\_358

| Scan  | Method   | Score  | Mass    | Gene names |
|-------|----------|--------|---------|------------|
| 18492 | TOF; CID | 106.32 | 1388.62 | PAR32      |

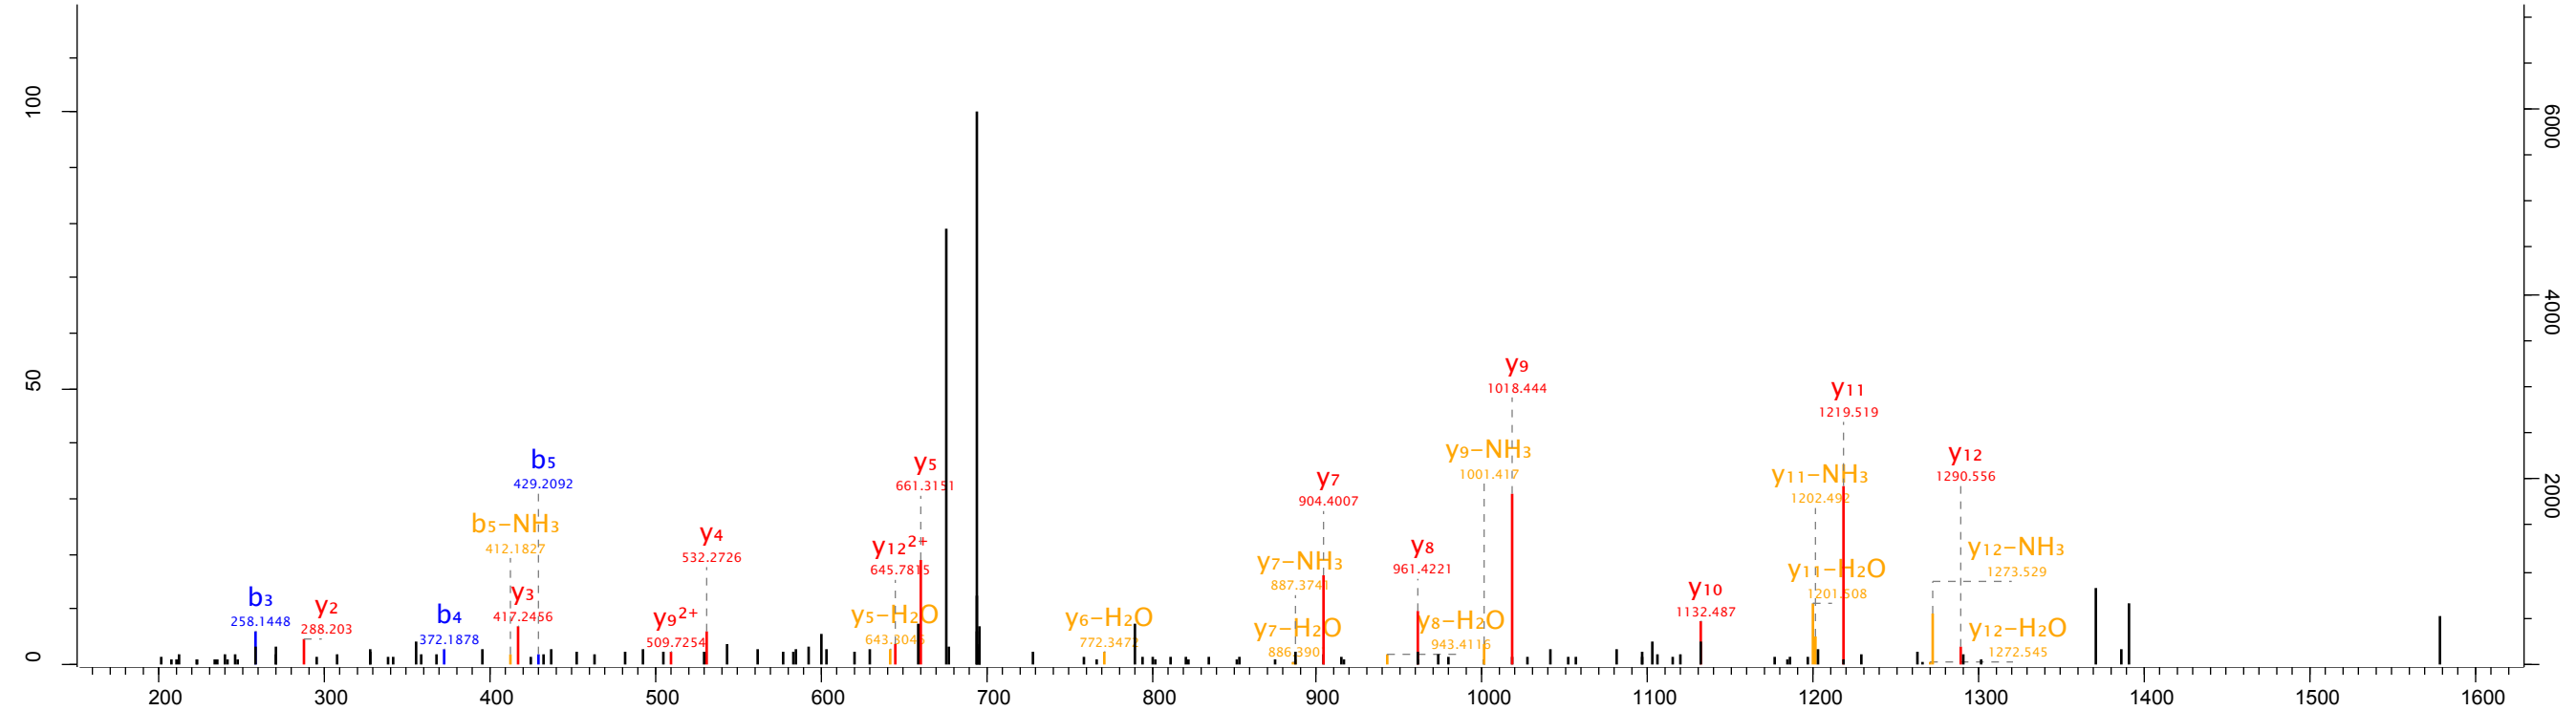

Raw file  
UPS1+500ngY\_90minTop17\_BC4\_01\_358

| Scan  | Method   | Score | Mass    | Gene names |
|-------|----------|-------|---------|------------|
| 18662 | TOF; CID | 98.1  | 1356.67 | NUP57      |

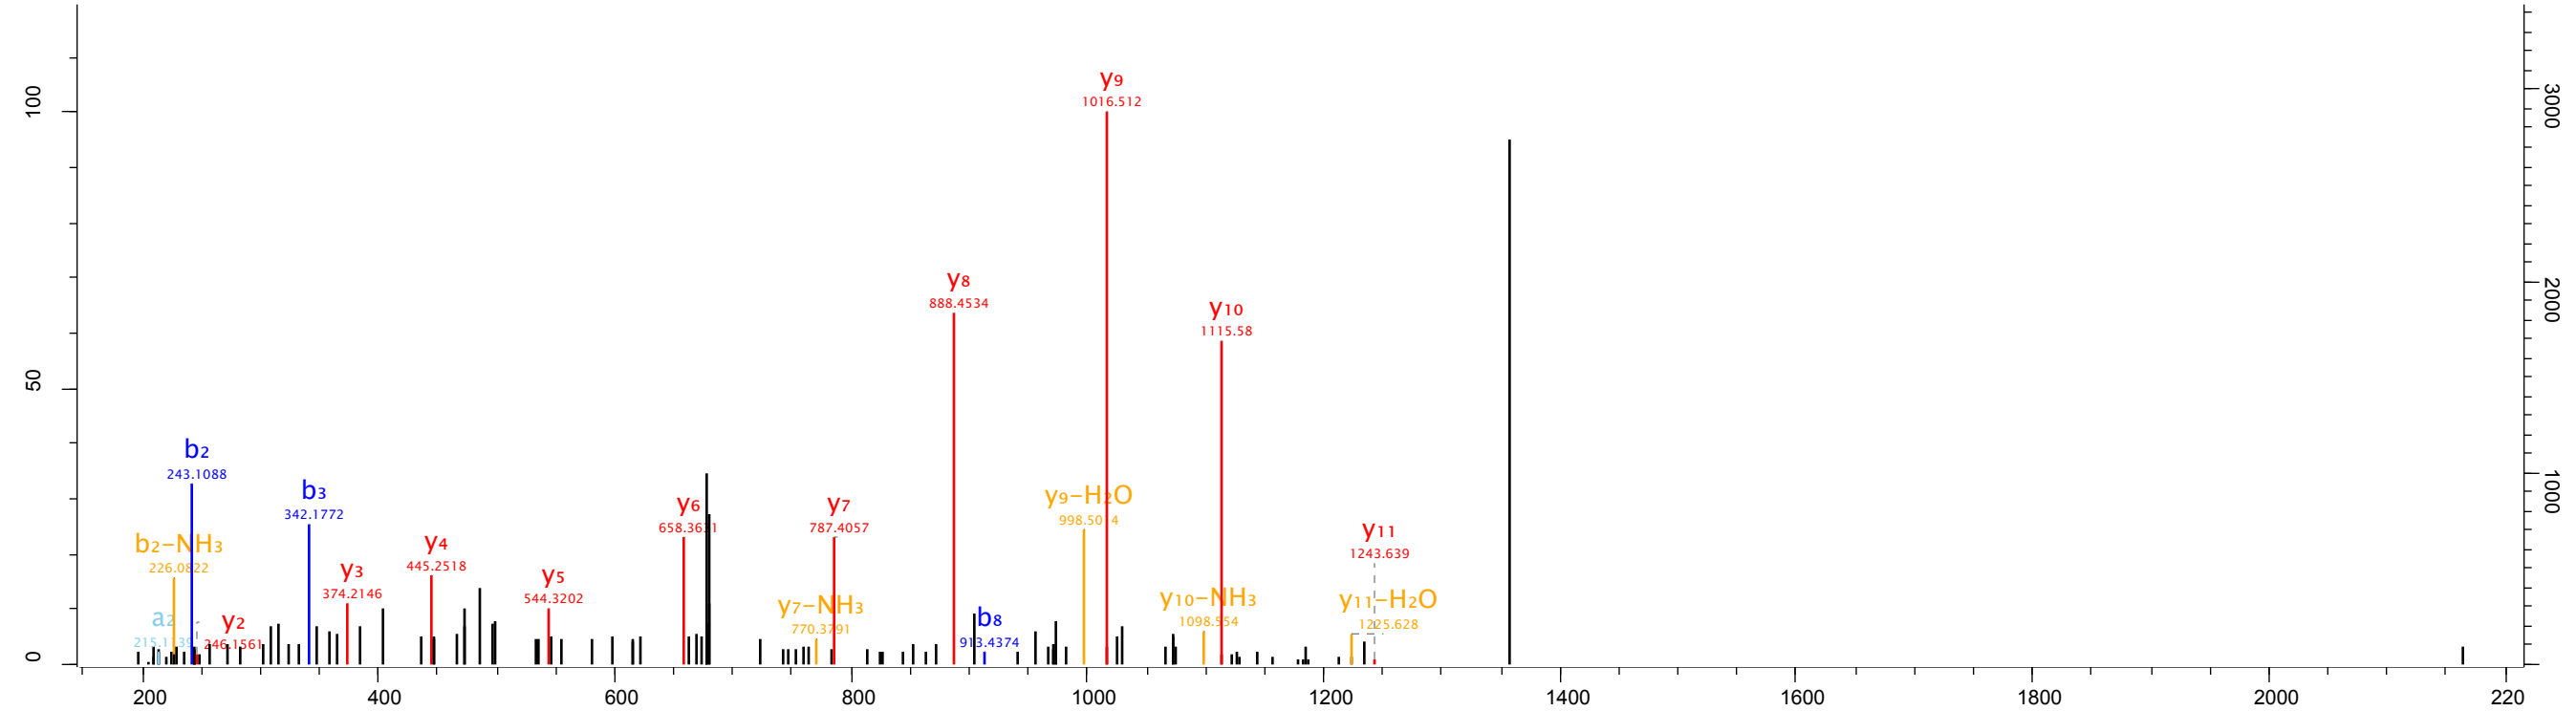

Raw file

UPS1+500ngY\_90minTop17\_BC4\_01\_358

| Scan  | Method   | Score | Mass    | Gene names |
|-------|----------|-------|---------|------------|
| 19006 | TOF; CID | 50.35 | 1168.49 | CYR1       |

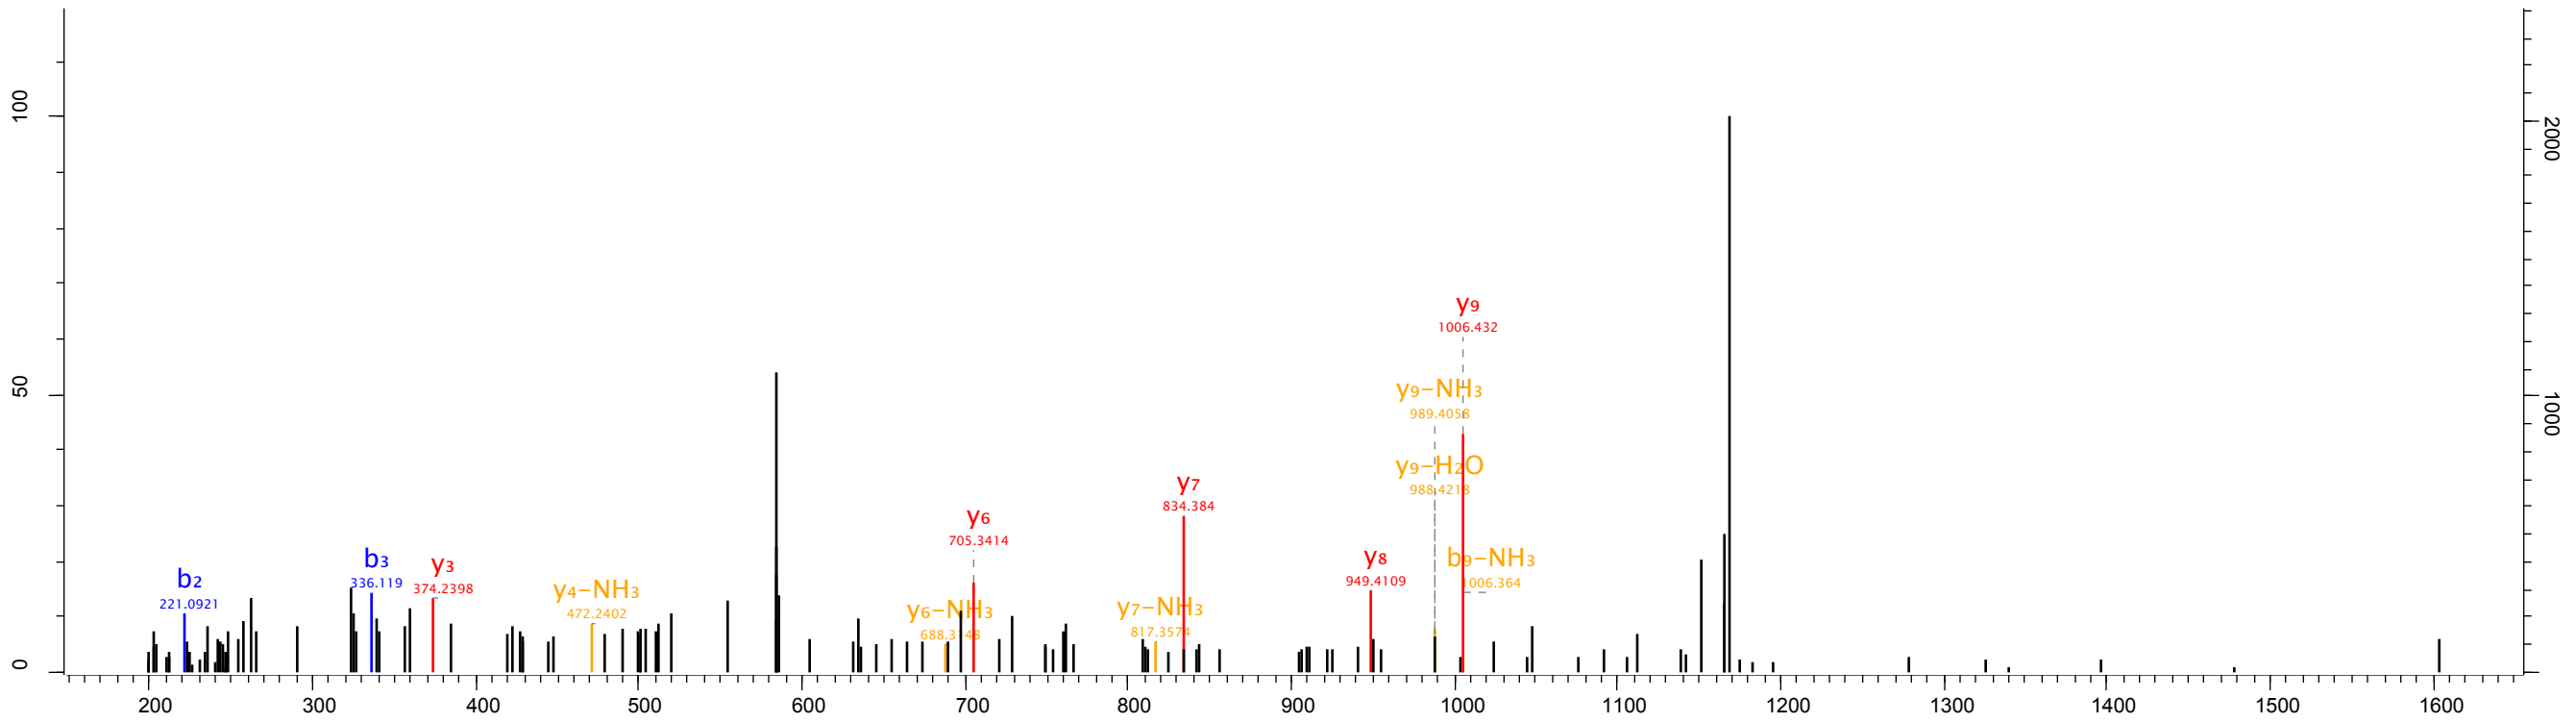

Raw file  
UPSI+500ngY\_90minTop17\_BC4\_01\_358

| Scan  | Method   | Score | Mass    | Gene names |
|-------|----------|-------|---------|------------|
| 19192 | TOF; CID | 68.97 | 1417.68 | PNO1       |

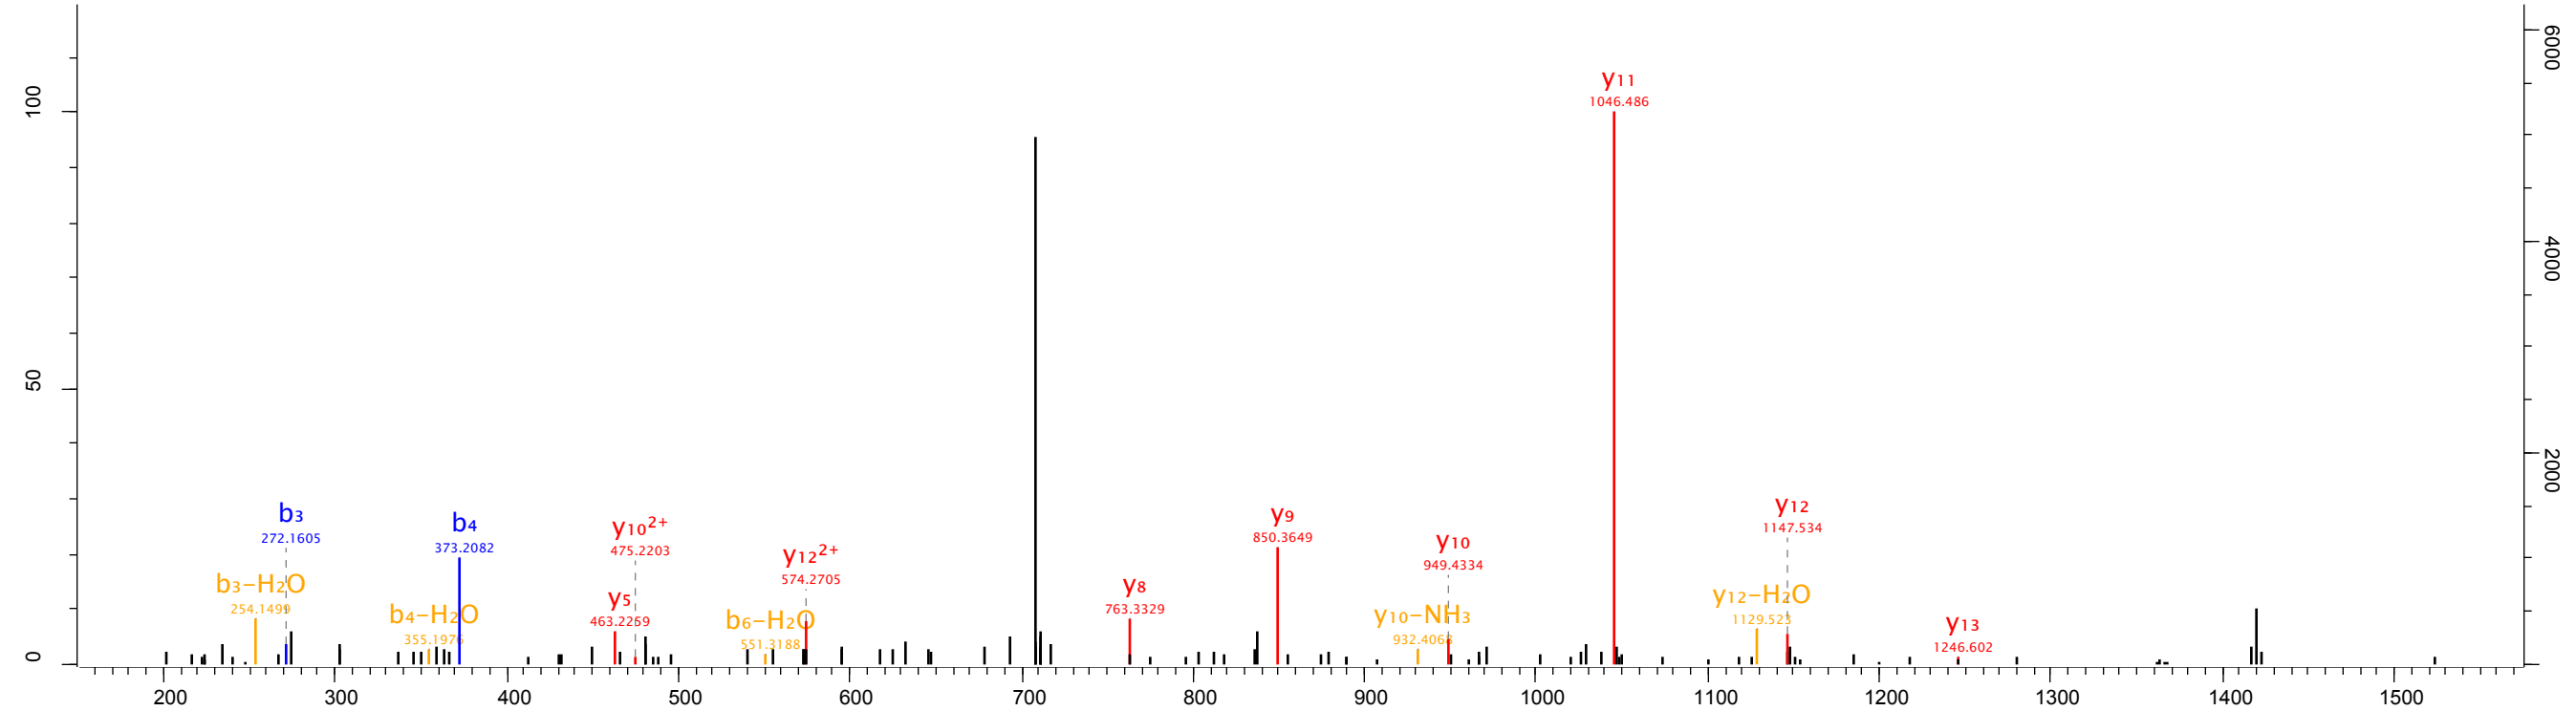

Raw file

UPS1+500ngY\_90minTop17\_BC4\_01\_358

Scan

19832

Method

TOF; CID

Score

59.84

Mass

1014.53

Gene names

PUP1

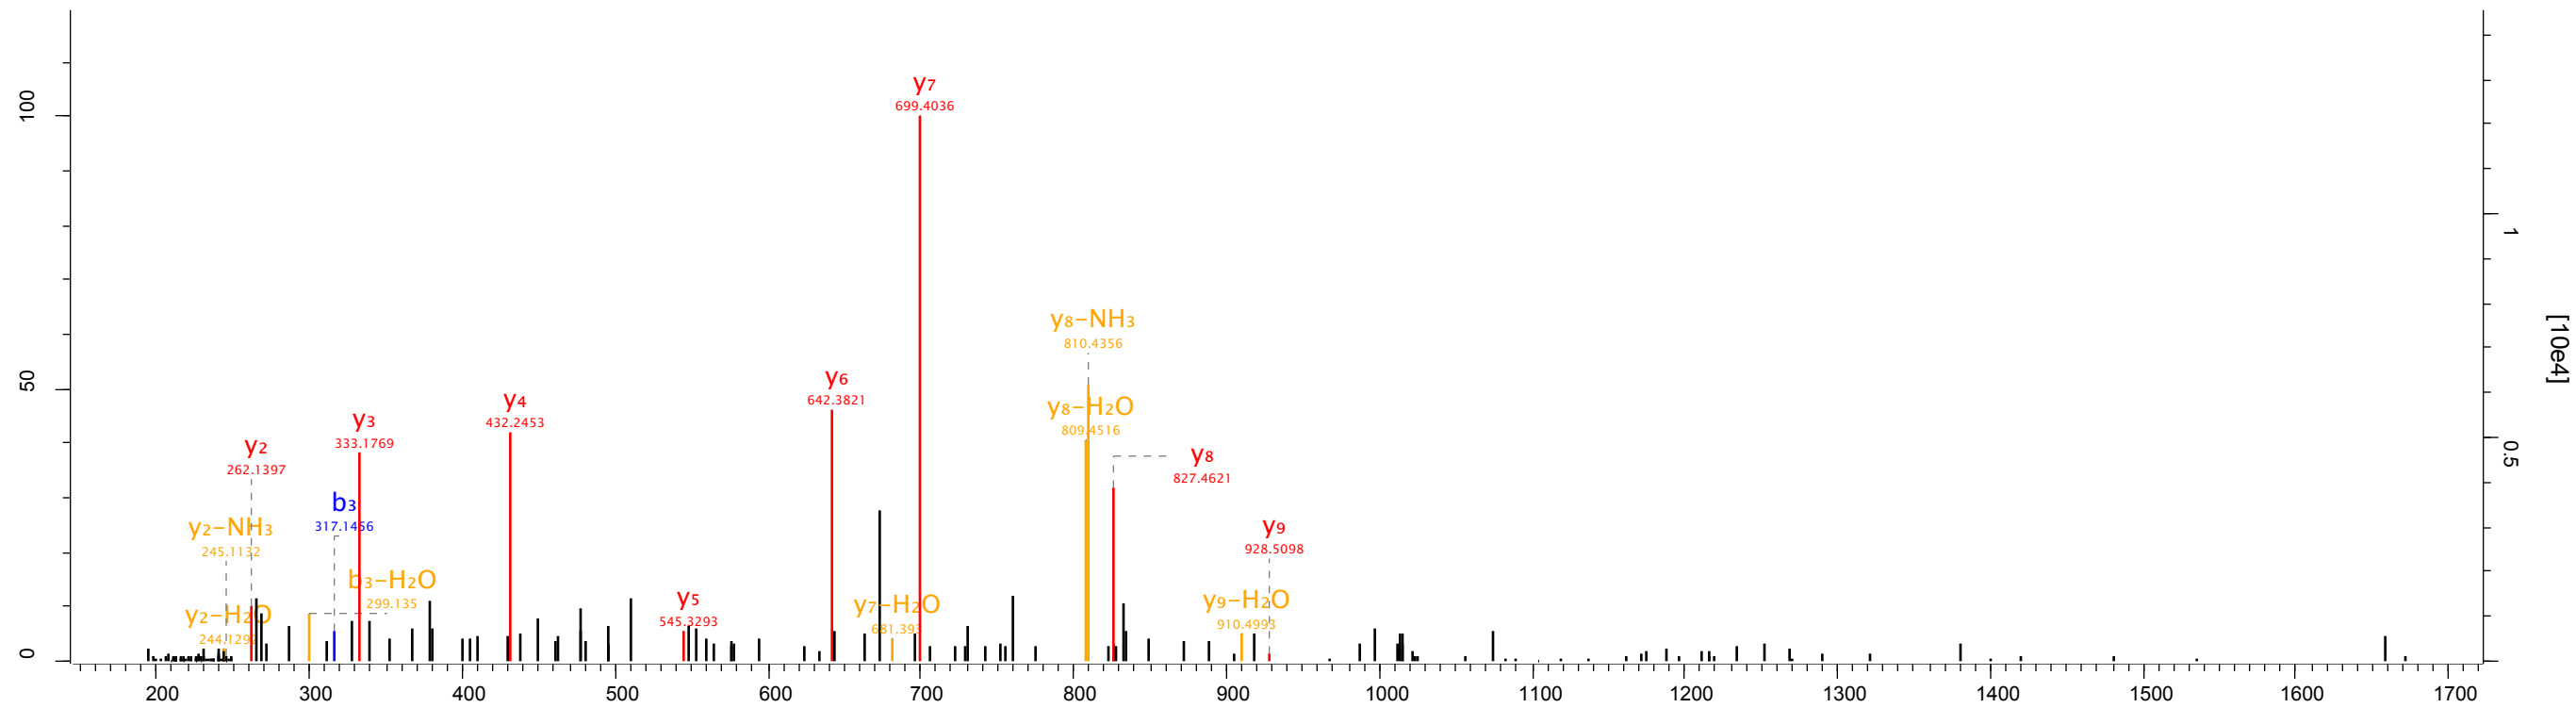

Raw file  
UPS1+500ngY\_90minTop17\_BC4\_01\_358

| Scan  | Method   | Score | Mass    | Gene names |
|-------|----------|-------|---------|------------|
| 20027 | TOF; CID | 80.24 | 2216.85 | SLG1       |

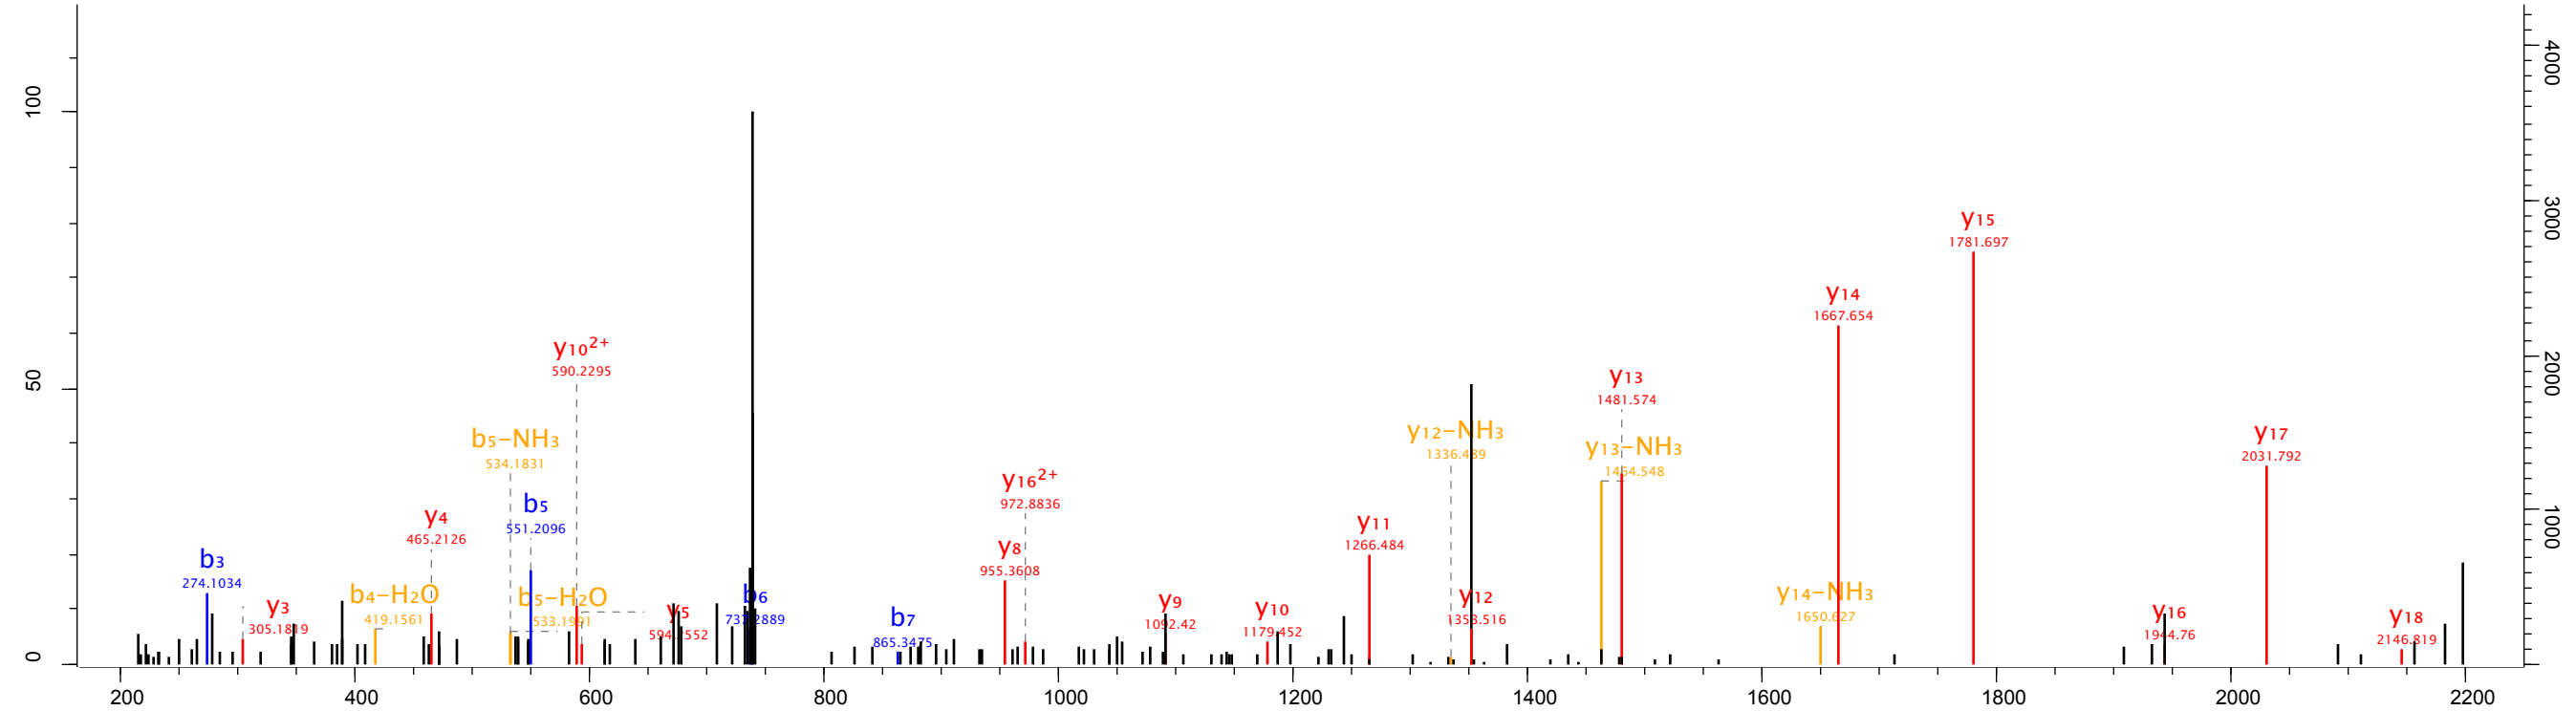

Raw file  
UPS1+500ngY\_90minTop17\_BC4\_01\_358

| Scan  | Method   | Score | Mass    | Gene names |
|-------|----------|-------|---------|------------|
| 20078 | TOF; CID | 54.02 | 1274.62 | CIR2       |

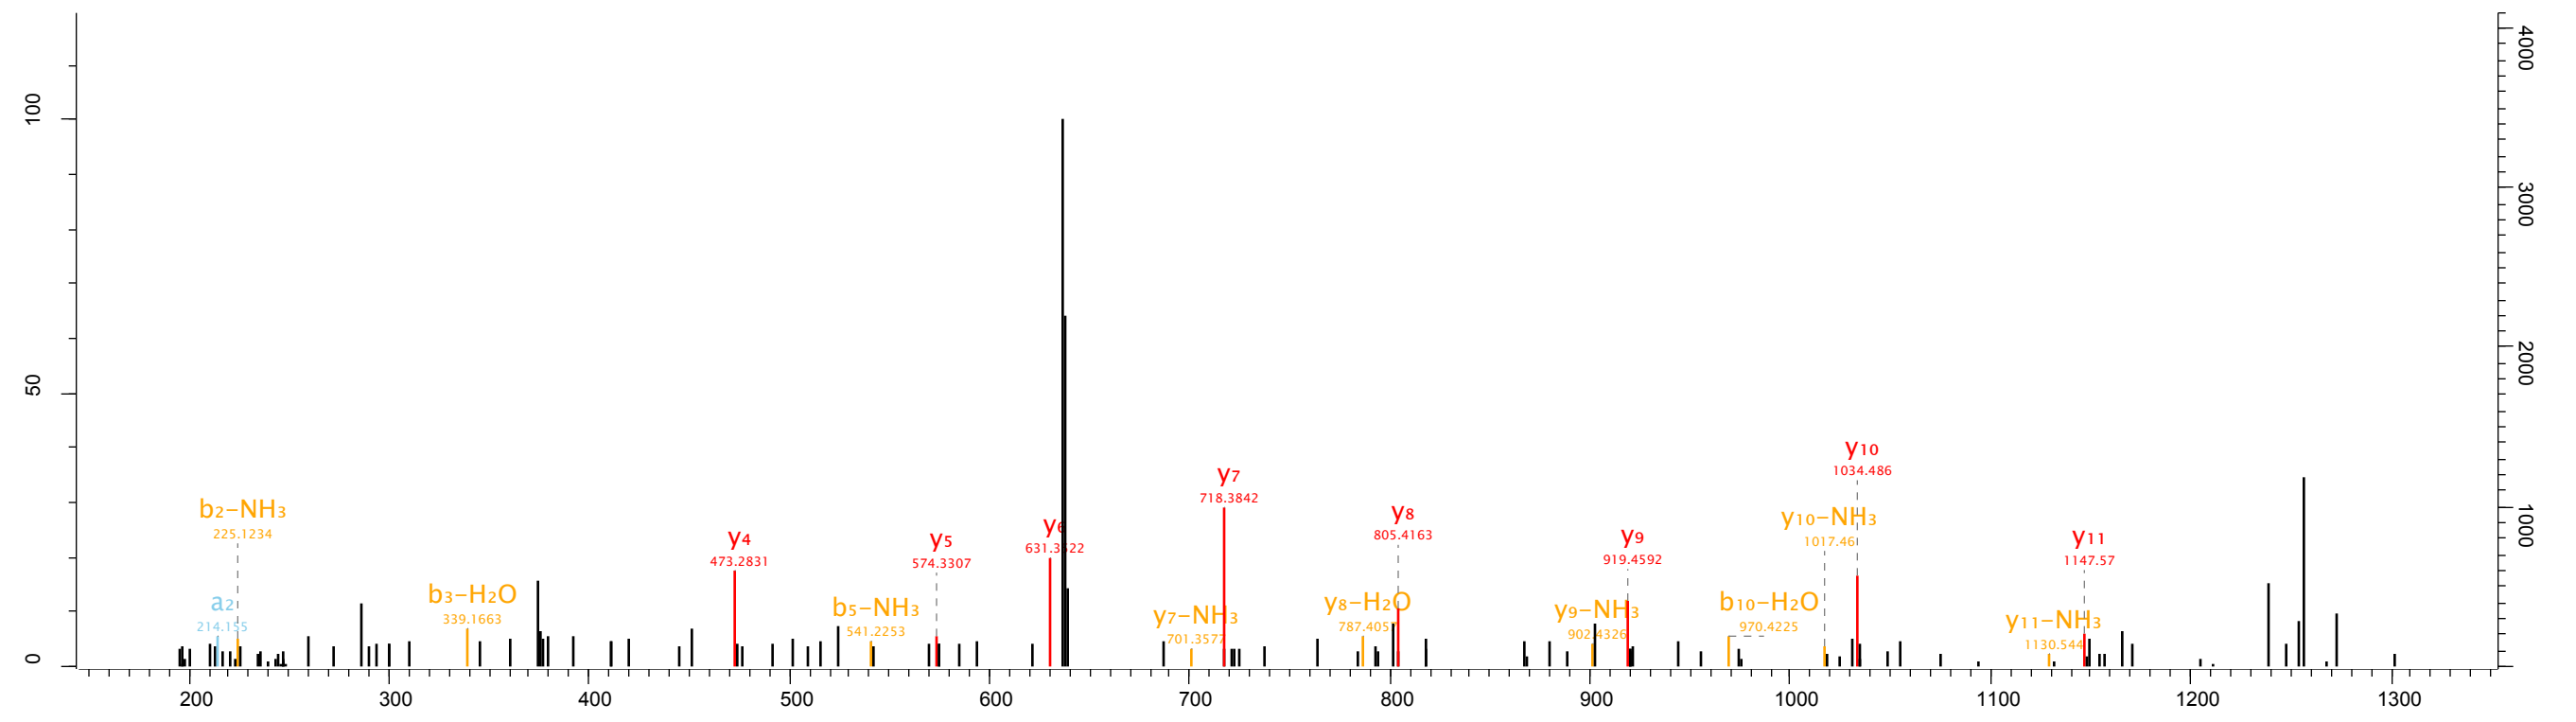

Raw file  
UPS1+500ngY\_90minTop17\_BC4\_01\_358

| Scan  | Method   | Score | Mass    | Gene names |
|-------|----------|-------|---------|------------|
| 20200 | TOF; CID | 66.96 | 1166.56 | FMP10      |

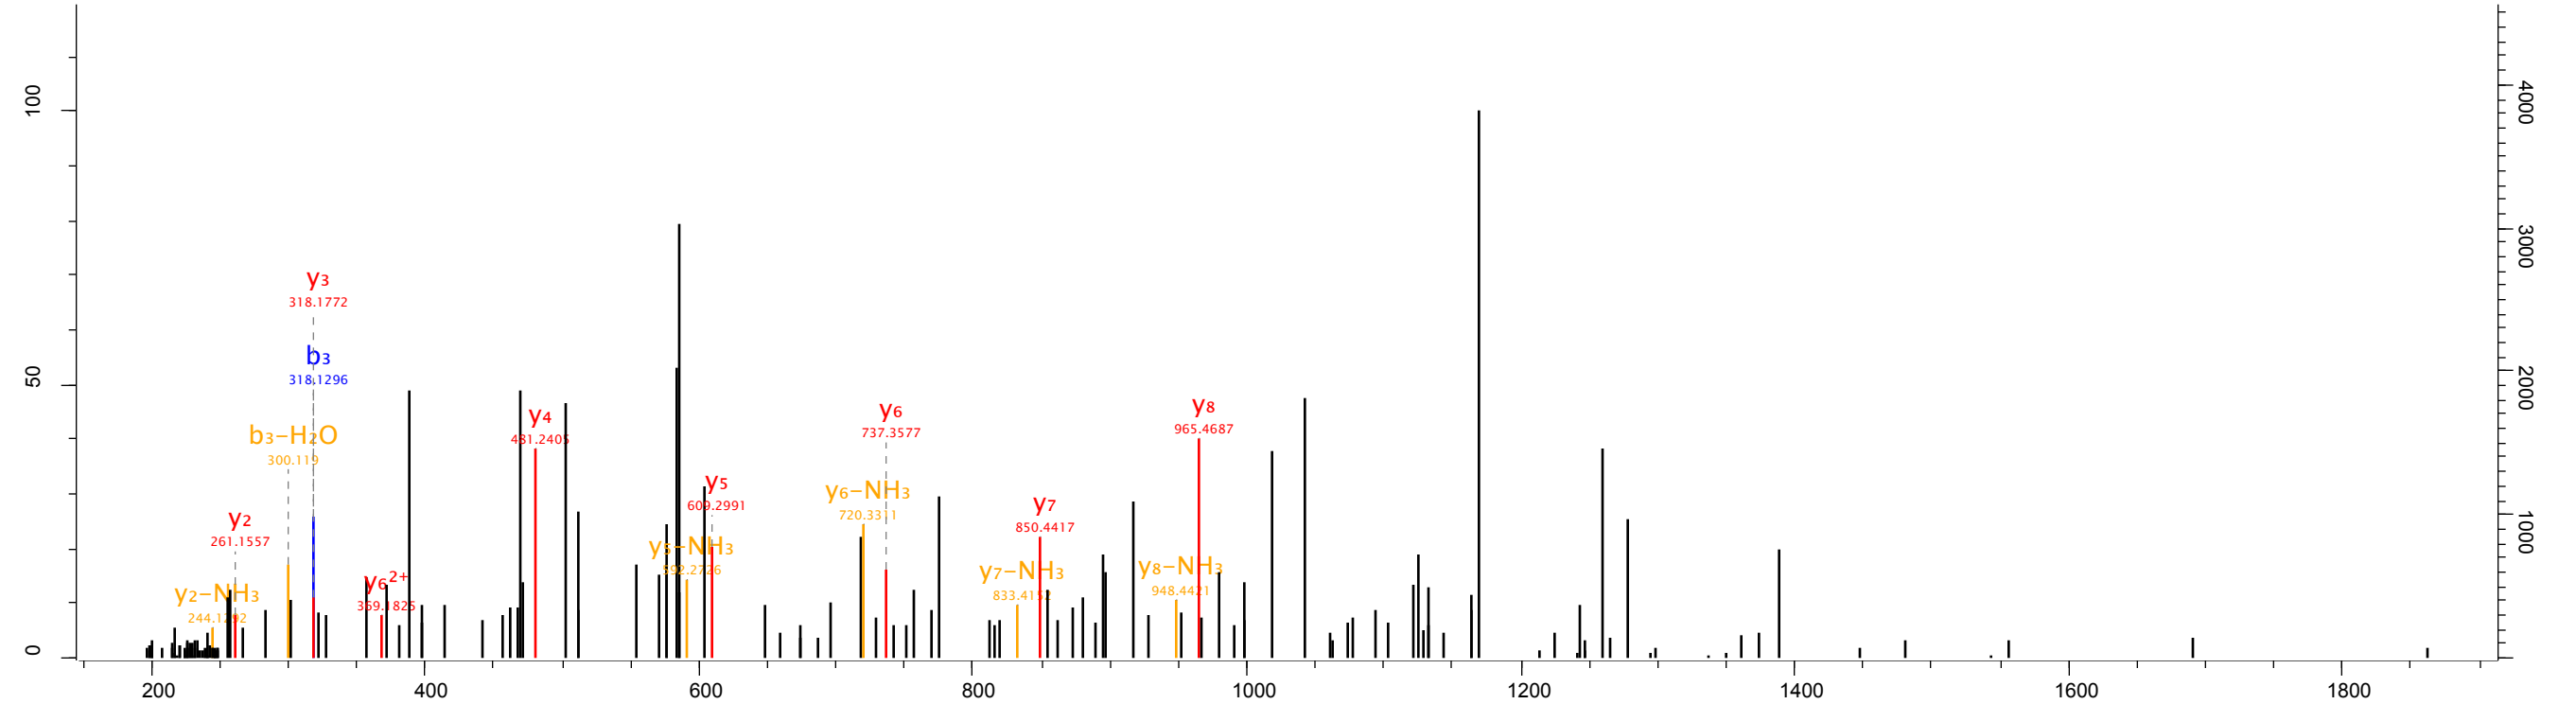



Raw file  
UPS1+500ngY\_90minTop17\_BC4\_01\_358

| Scan  | Method   | Score | Mass    | Gene names |
|-------|----------|-------|---------|------------|
| 22234 | TOF; CID | 71.38 | 1070.47 | SHR3       |

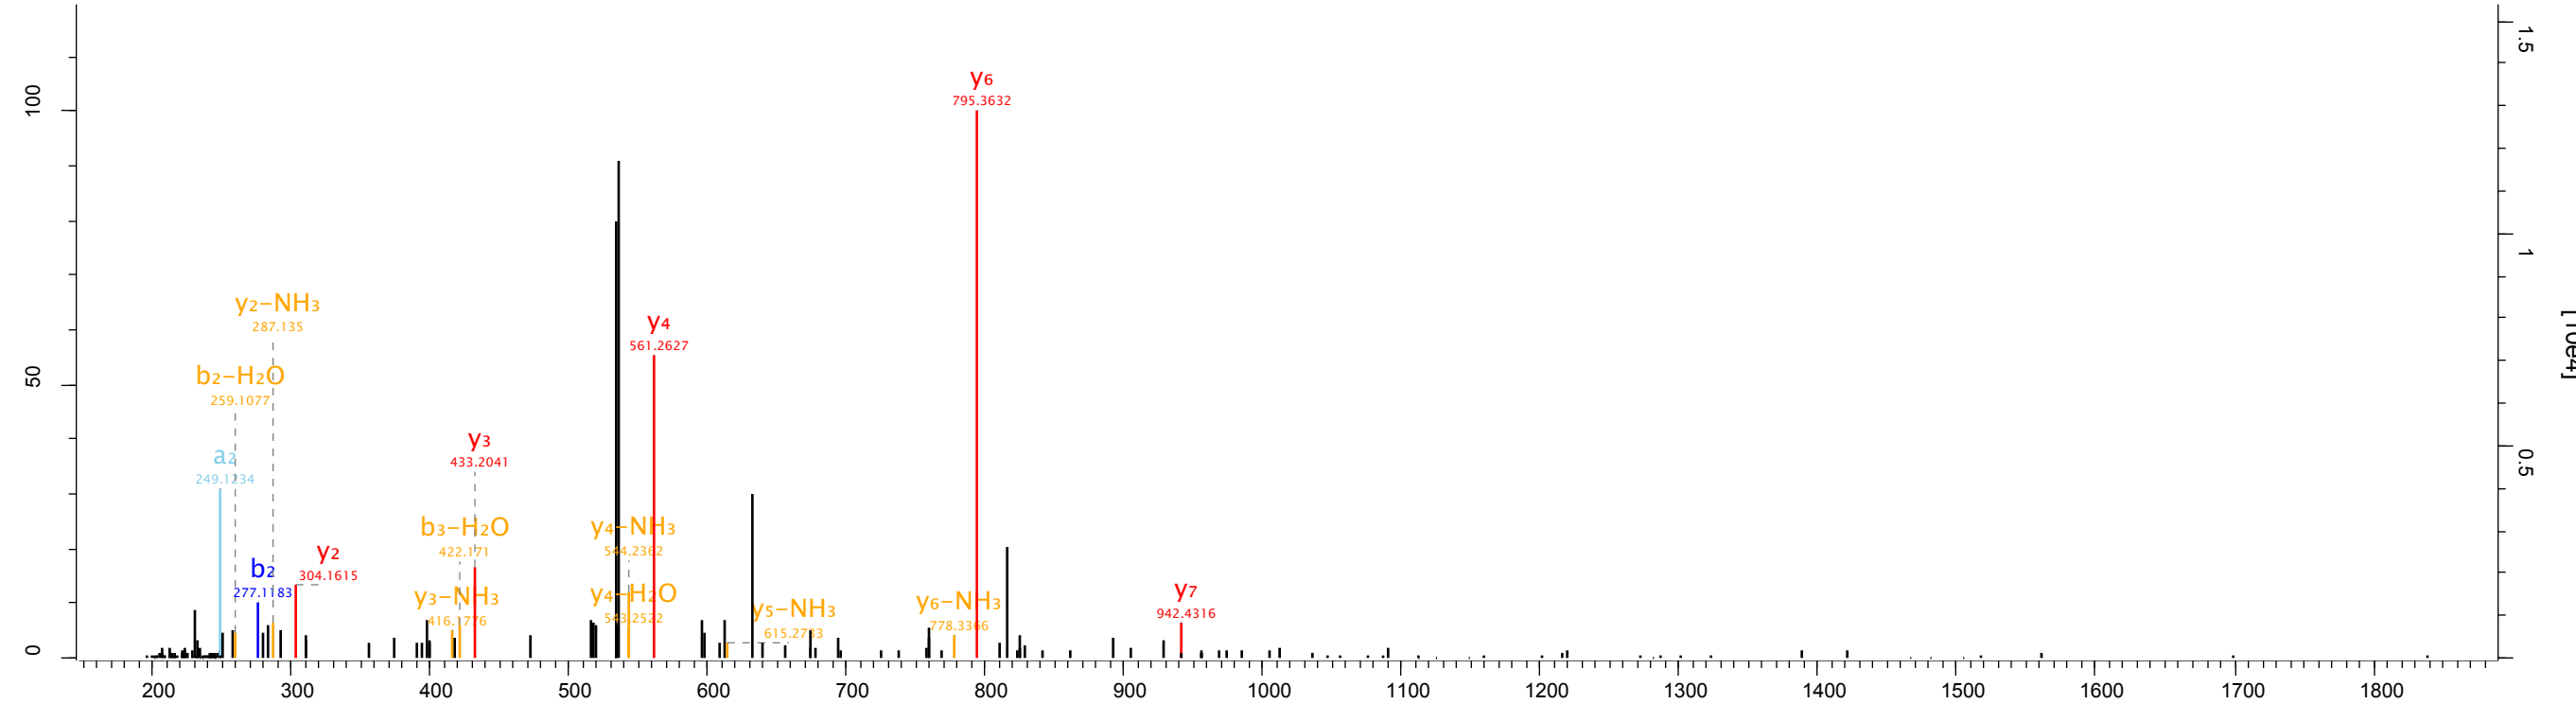

Raw file

UPS1+500ngY\_90minTop17\_BC4\_01\_358

Scan  
22844Method  
TOF; CIDScore  
122.97Mass  
1422.61Gene names  
RRP1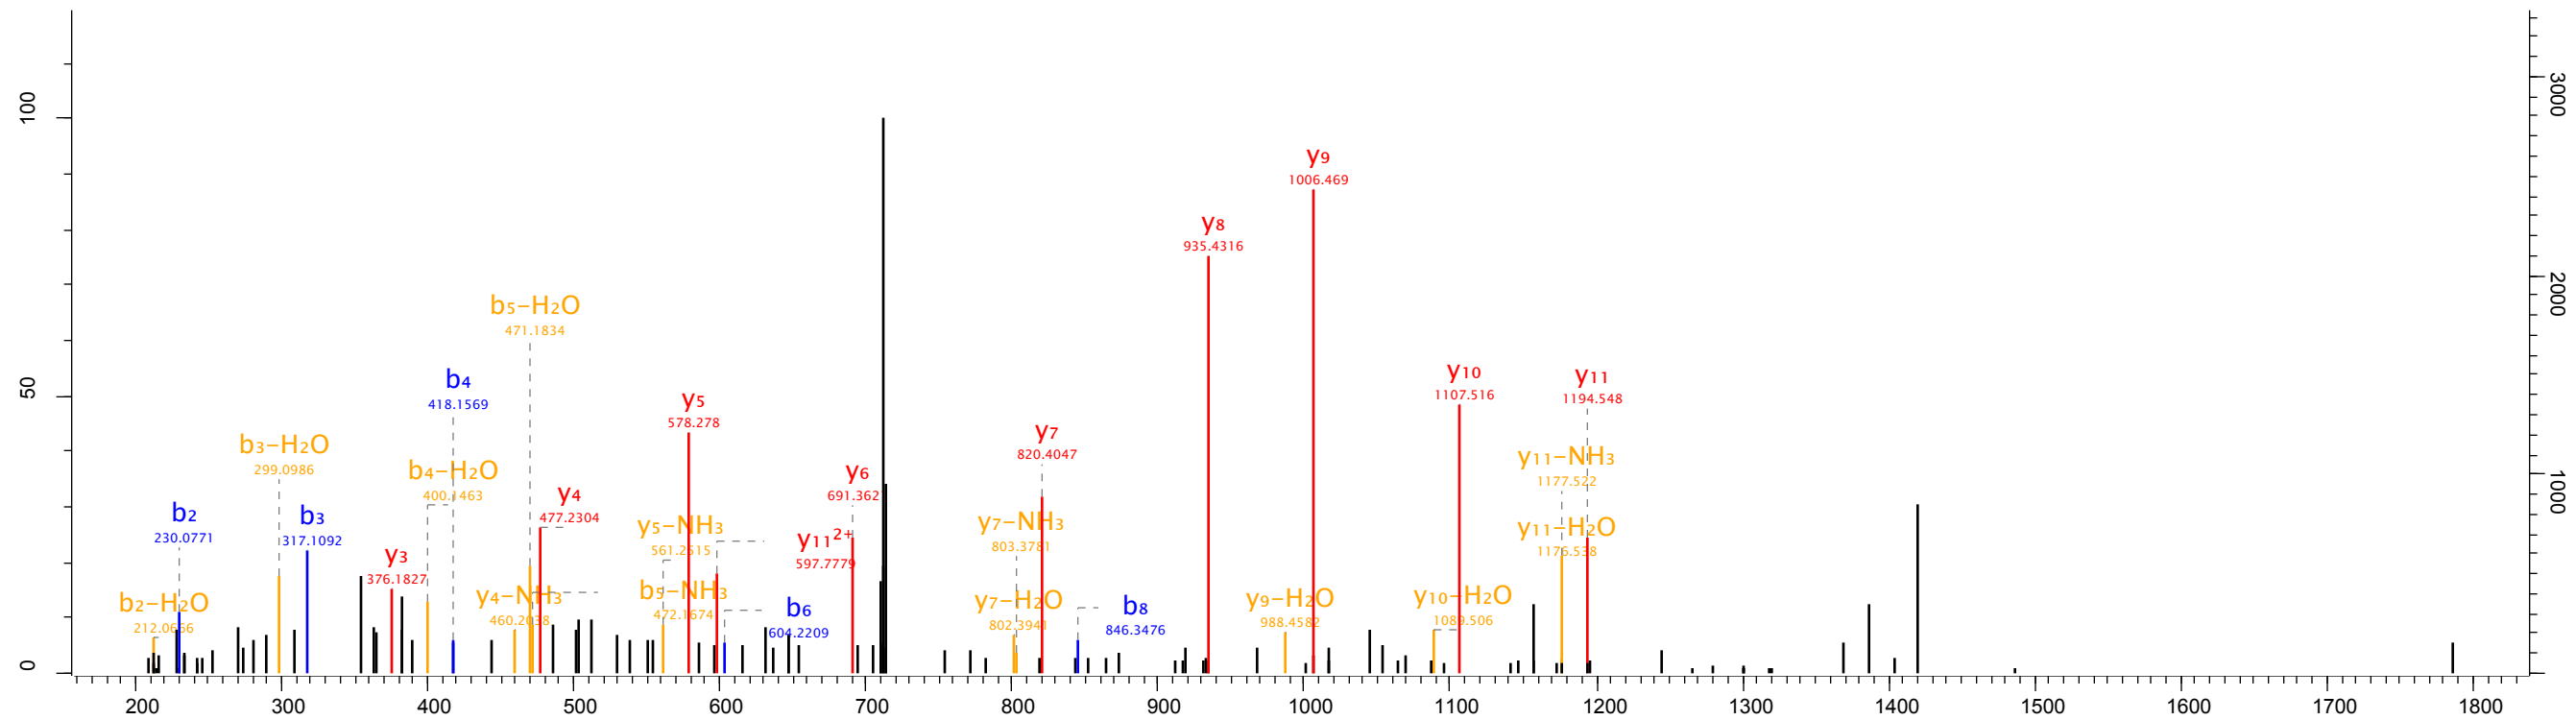

Raw file

UPS1+500ngY\_90minTop17\_BC4\_01\_358

Scan 23805 Method TOF; CID Score 88.34 Mass 1304.6 Gene names FMP16

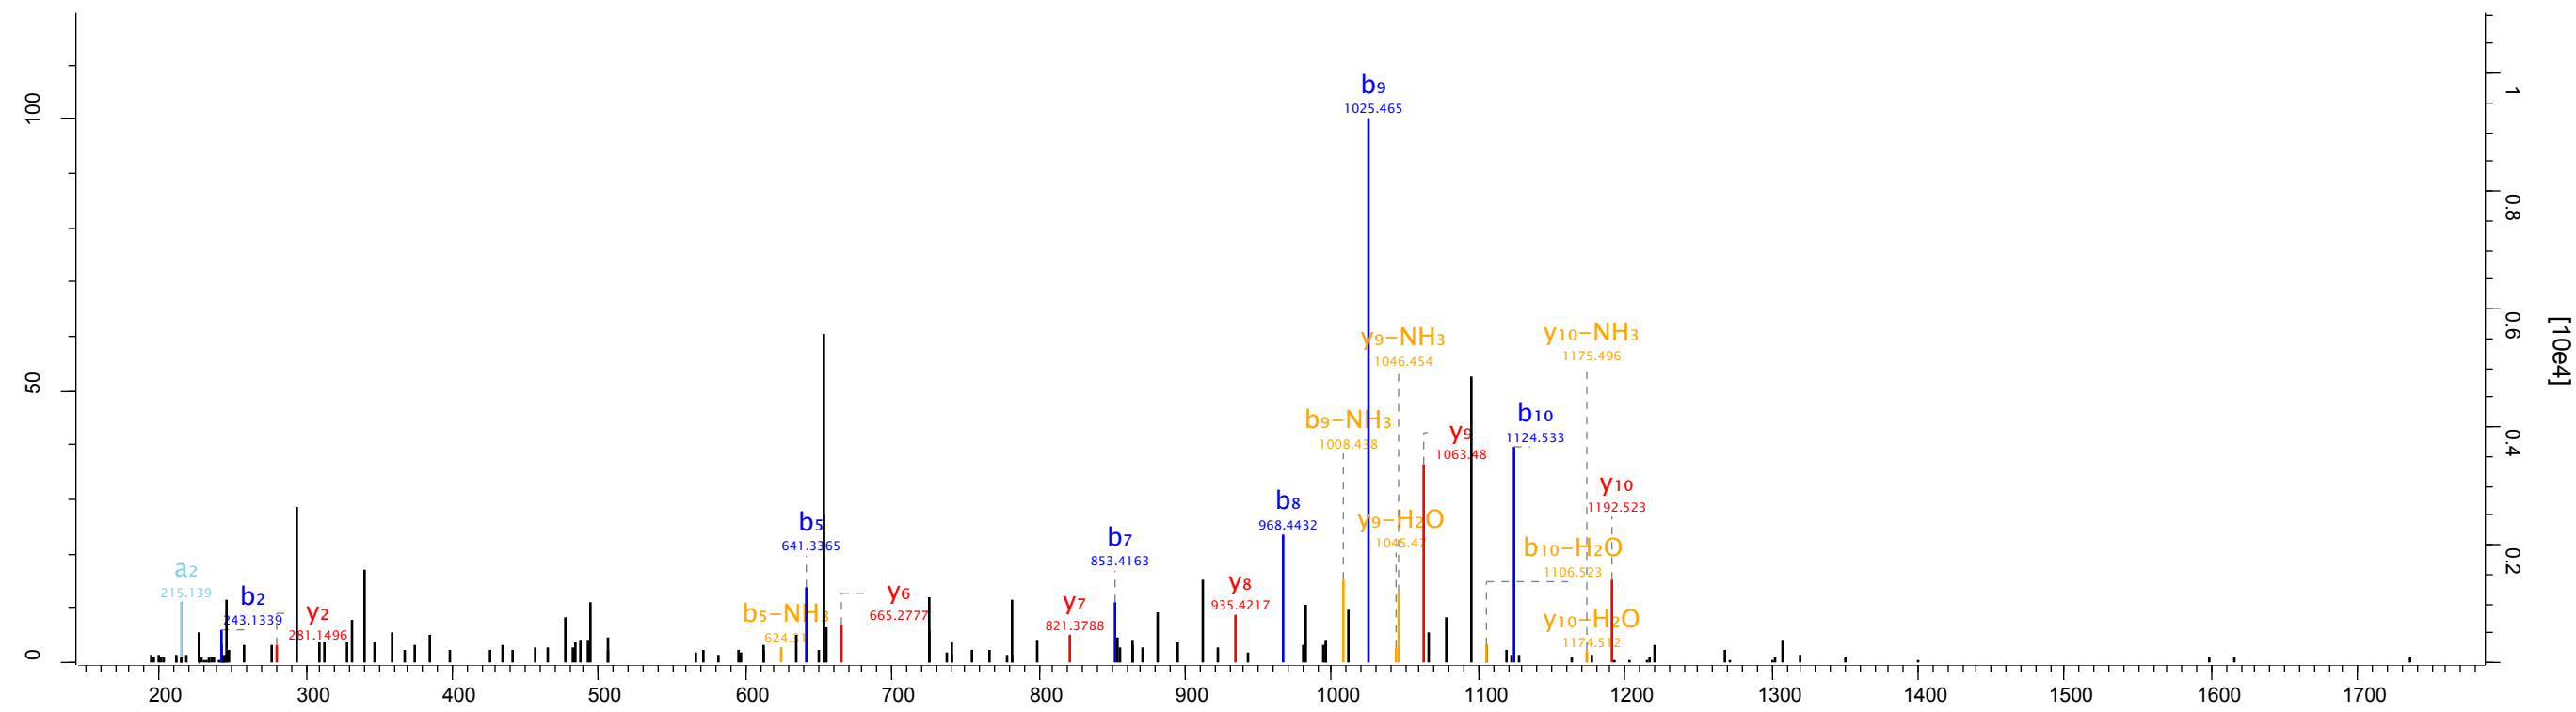

Raw file

UPS1+500ngY\_90minTop17\_BC4\_01\_358

| Scan  | Method   | Score  | Mass    | Gene names |
|-------|----------|--------|---------|------------|
| 24771 | TOF; CID | 118.31 | 1344.69 | POM33      |

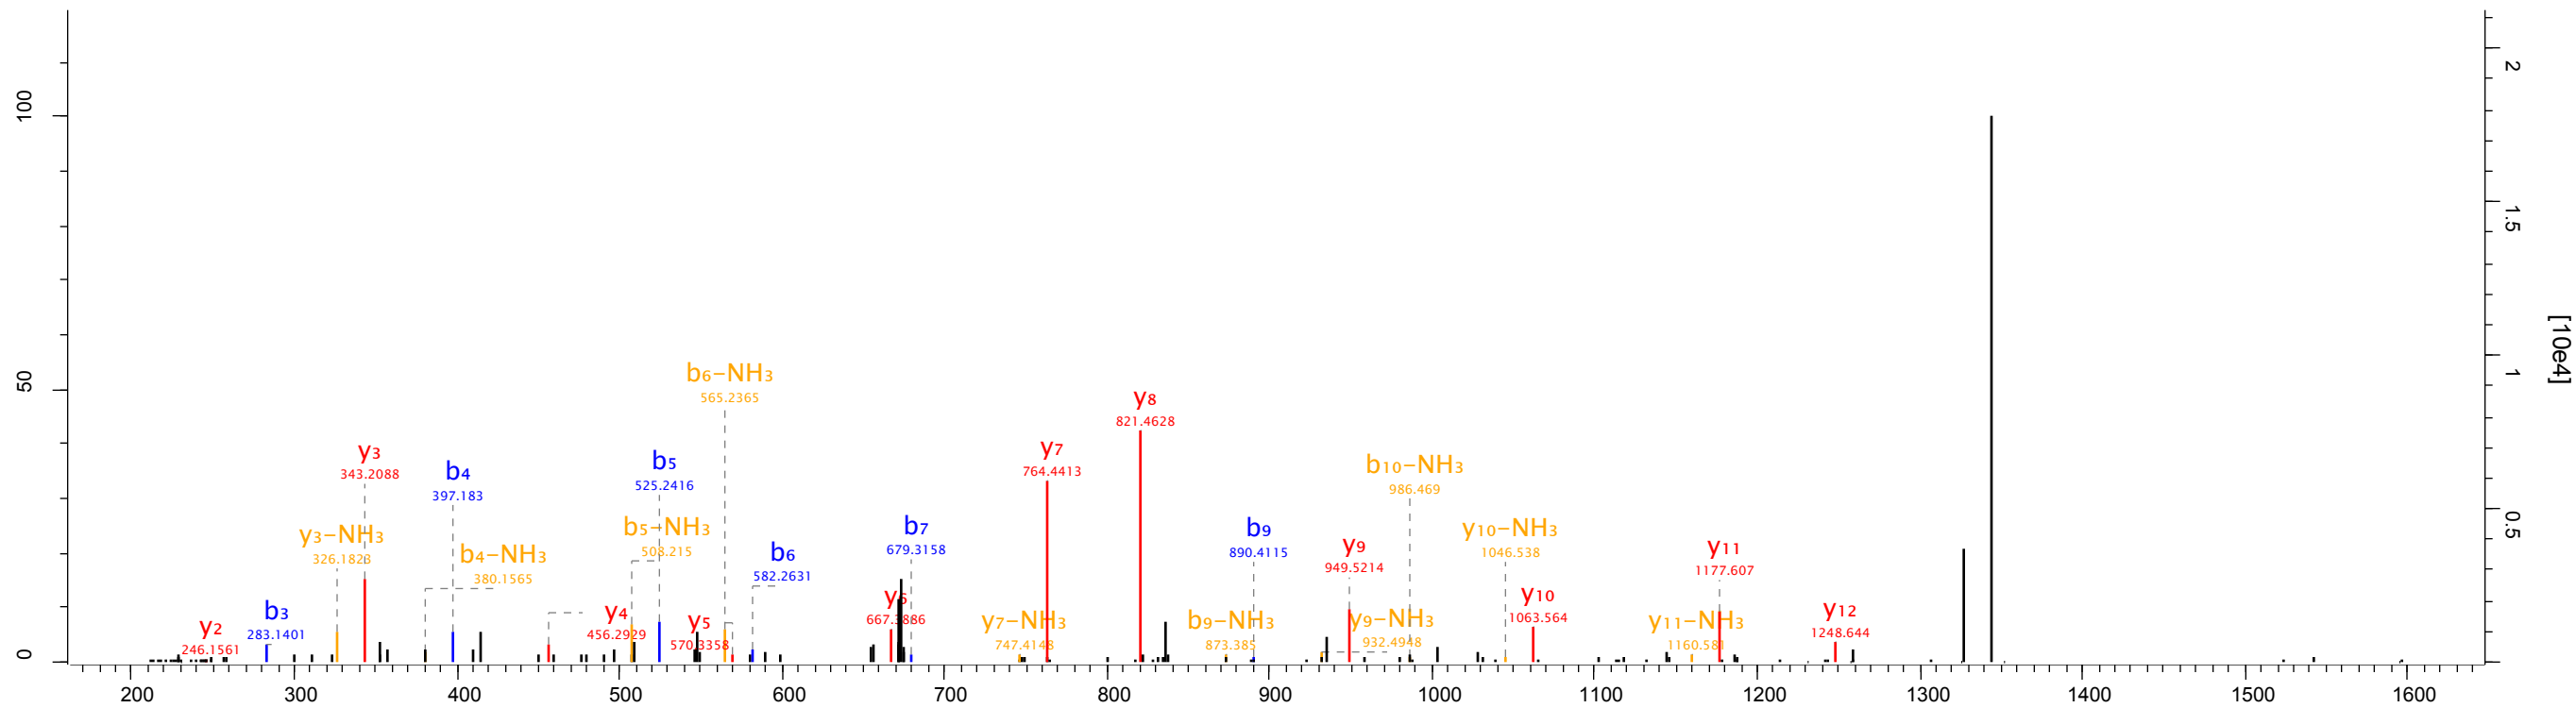

Raw file  
UPS1+500ngY\_90minTop17\_BC4\_01\_358

| Scan  | Method   | Score | Mass    | Gene names |
|-------|----------|-------|---------|------------|
| 24796 | TOF; CID | 54.26 | 1186.56 | AVT1       |

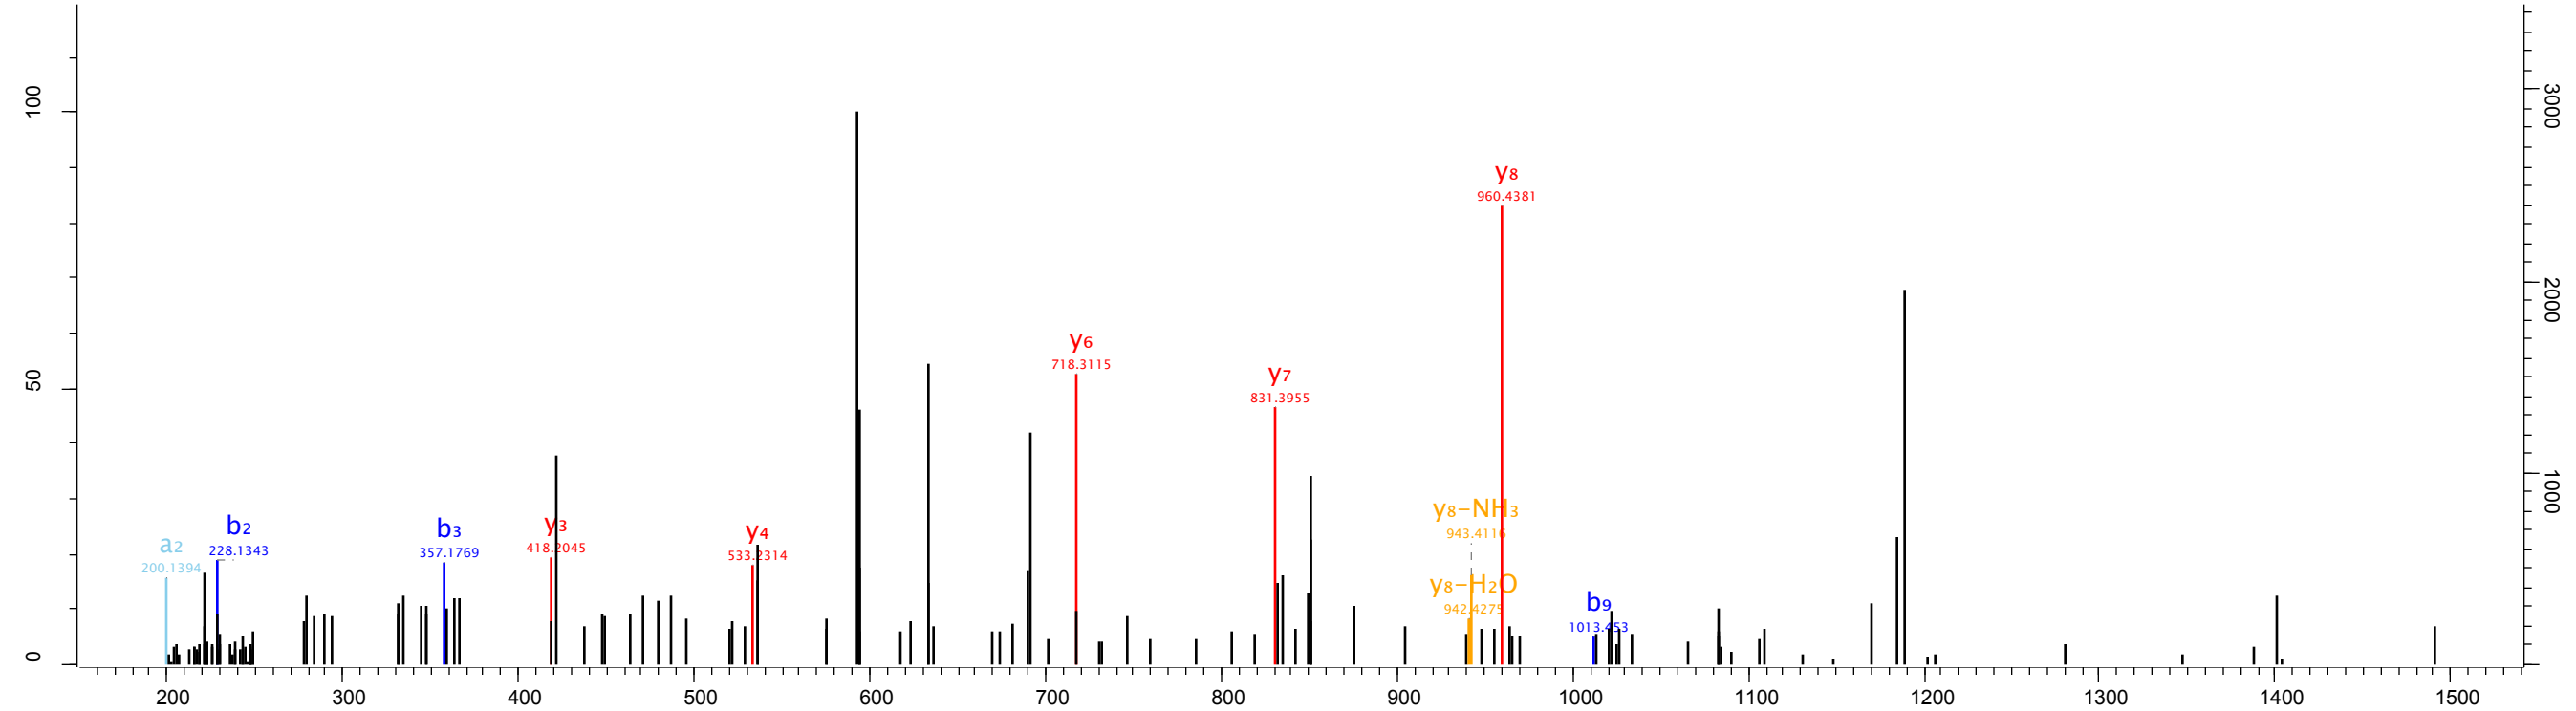

Raw file  
UPS1+500ngY\_90minTop17\_BC4\_01\_358

| Scan  | Method   | Score | Mass    | Gene names |
|-------|----------|-------|---------|------------|
| 24908 | TOF; CID | 42.91 | 1920.87 | GPA2       |

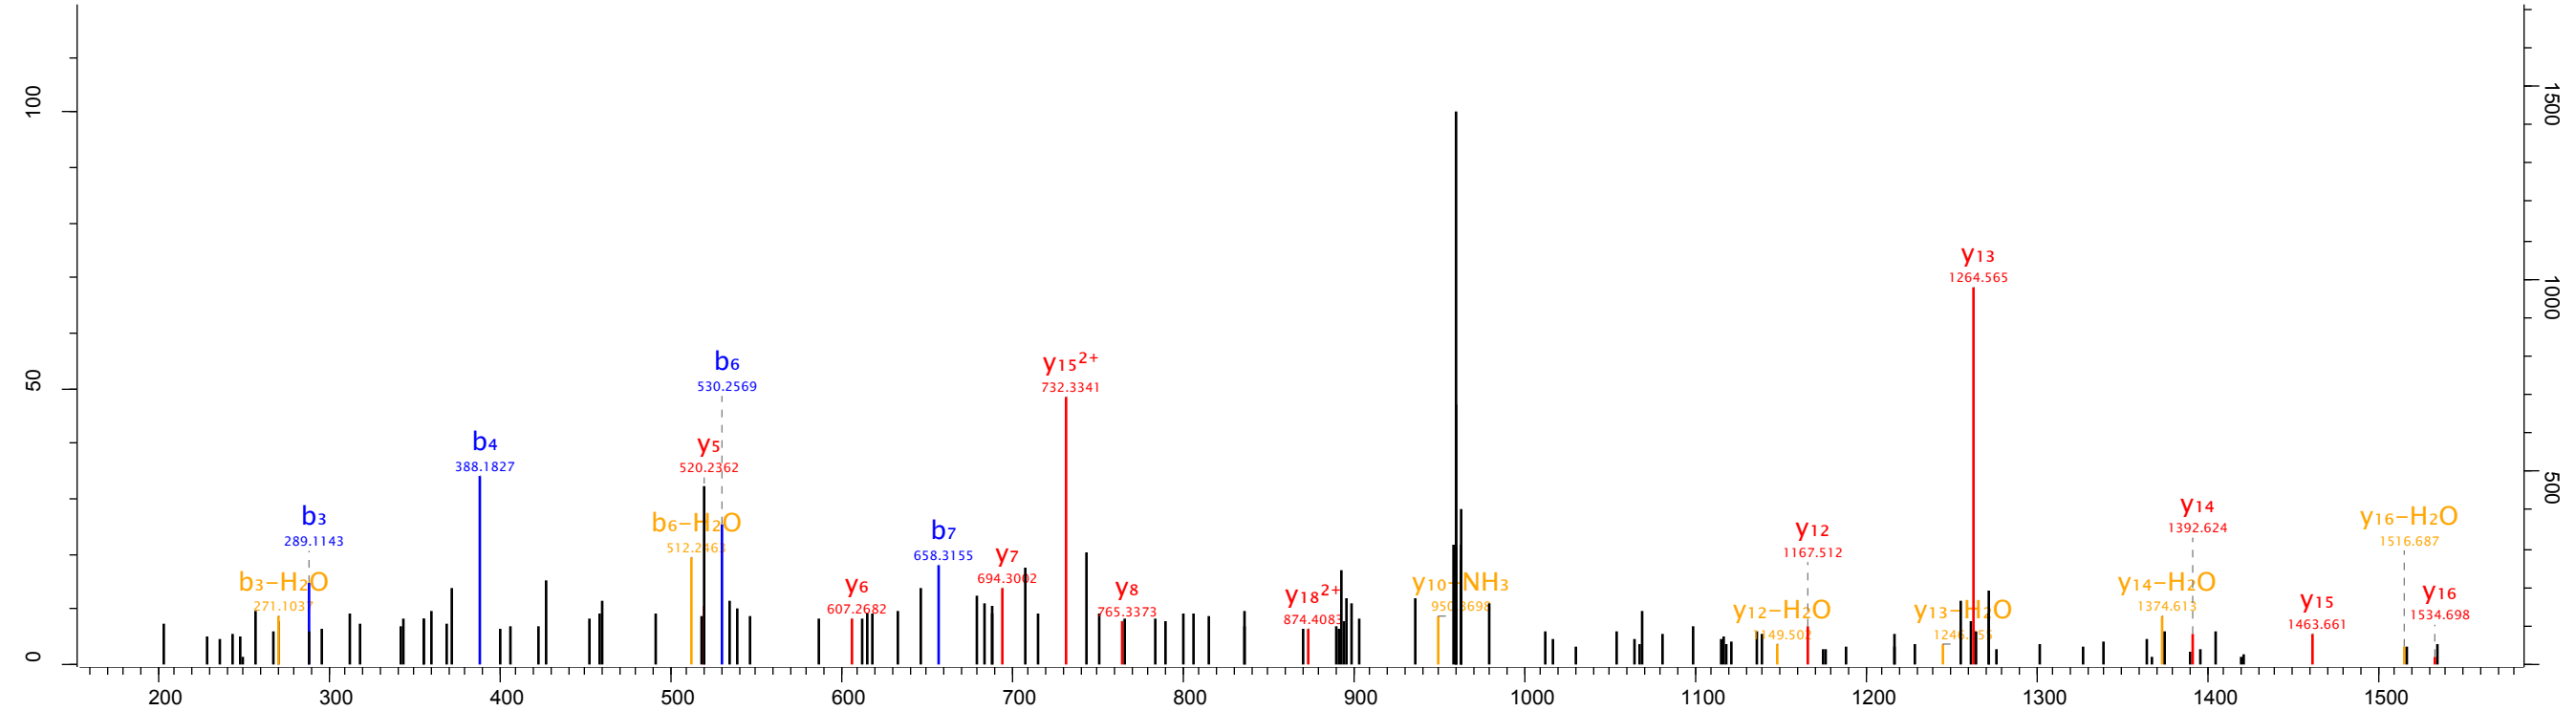

Raw file  
UPS1+500ngY\_90minTop17\_BC4\_01\_358

| Scan  | Method   | Score  | Mass    | Gene names |
|-------|----------|--------|---------|------------|
| 25699 | TOF; CID | 107.69 | 1415.69 | ARL1       |

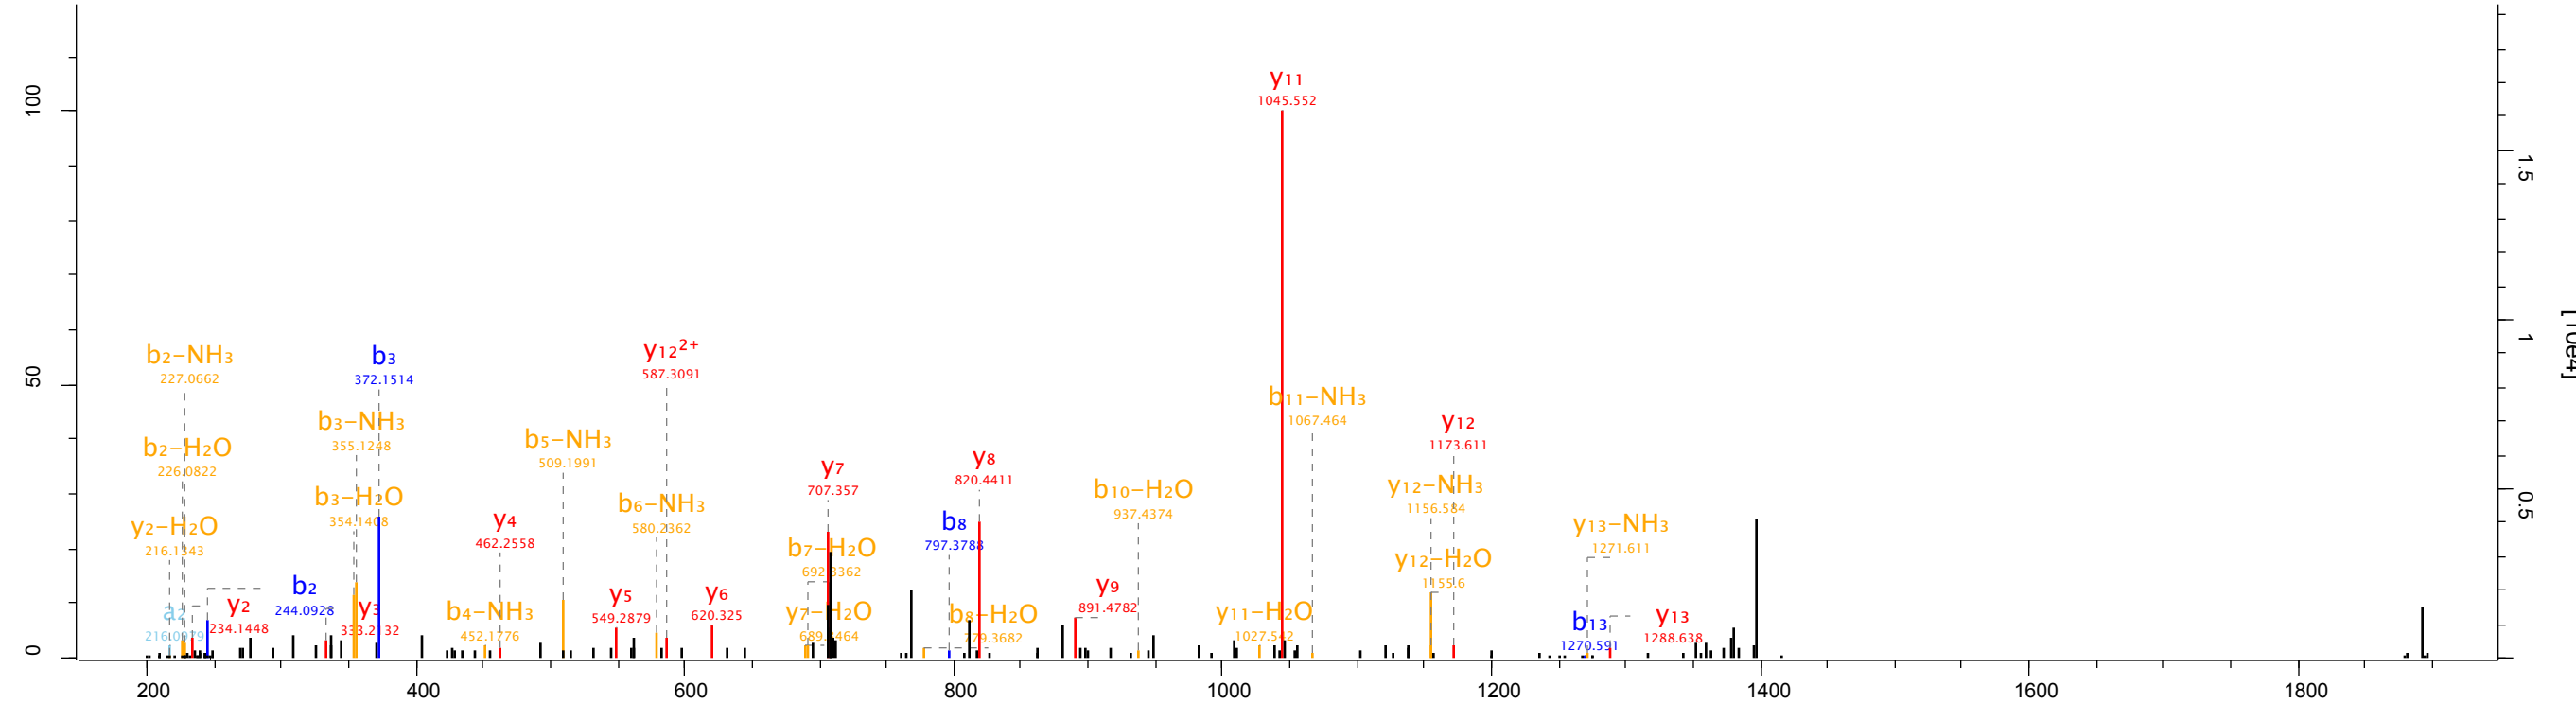

Raw file

UPS1+500ngY\_90minTop17\_BC4\_01\_358

Scan  
25755Method  
TOF; CIDScore  
87.08Mass  
1328.7Gene names  
EMC5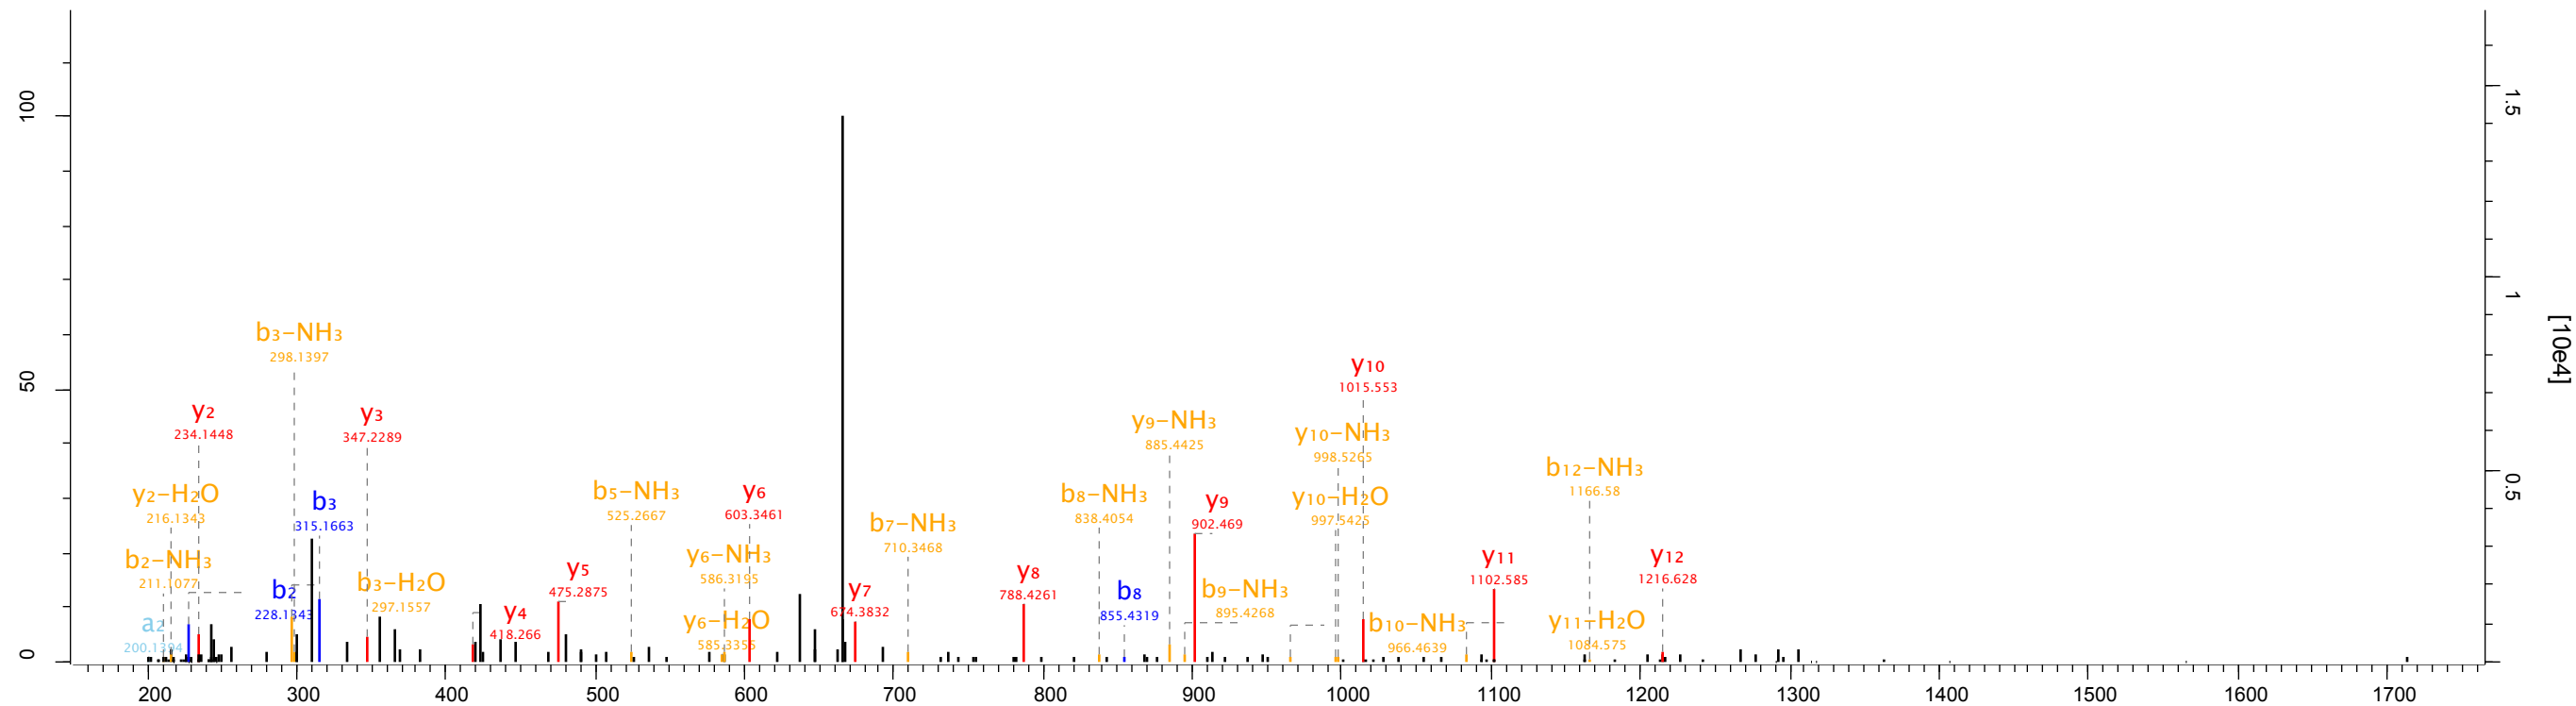



Raw file  
UPS1+500ngY\_90minTop17\_BC4\_01\_358

| Scan  | Method   | Score | Mass    | Gene names |
|-------|----------|-------|---------|------------|
| 26063 | TOF; CID | 68    | 1478.63 | RPC17      |

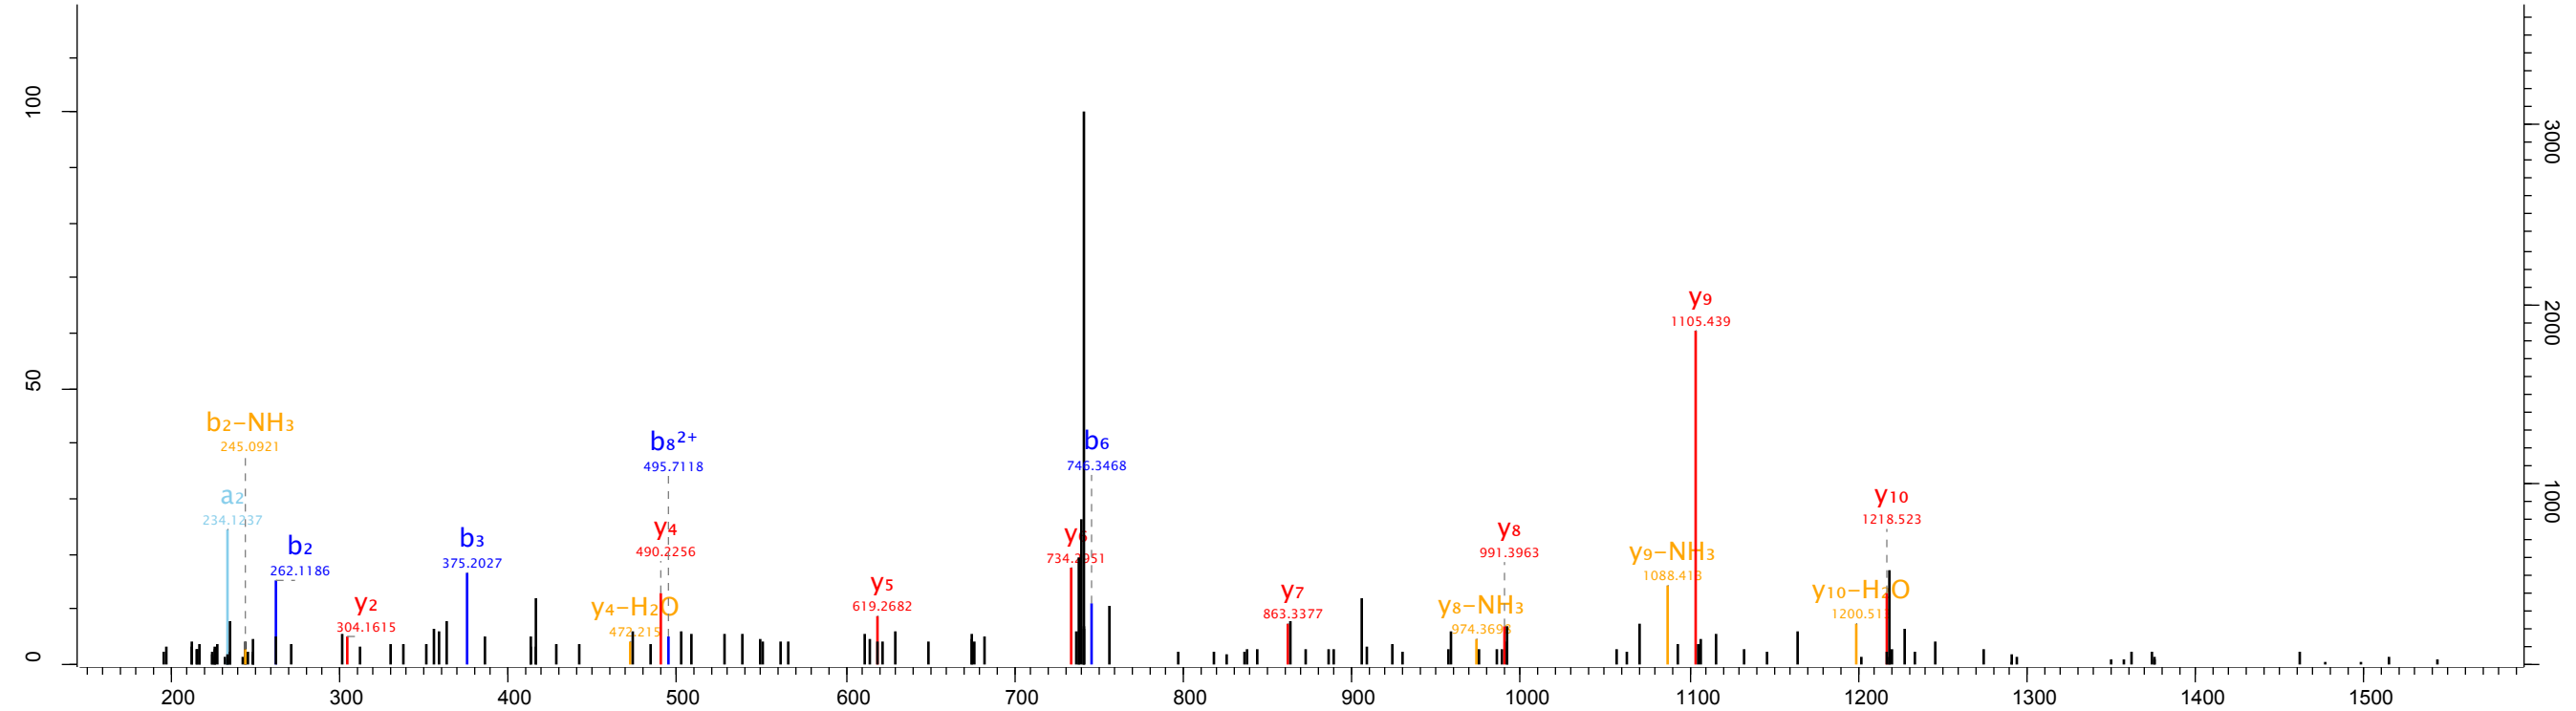

Raw file  
UPS1+500ngY\_90minTop17\_BC4\_01\_358

| Scan  | Method   | Score | Mass    | Gene names |
|-------|----------|-------|---------|------------|
| 26251 | TOF; CID | 54.28 | 1330.67 | TRM8       |

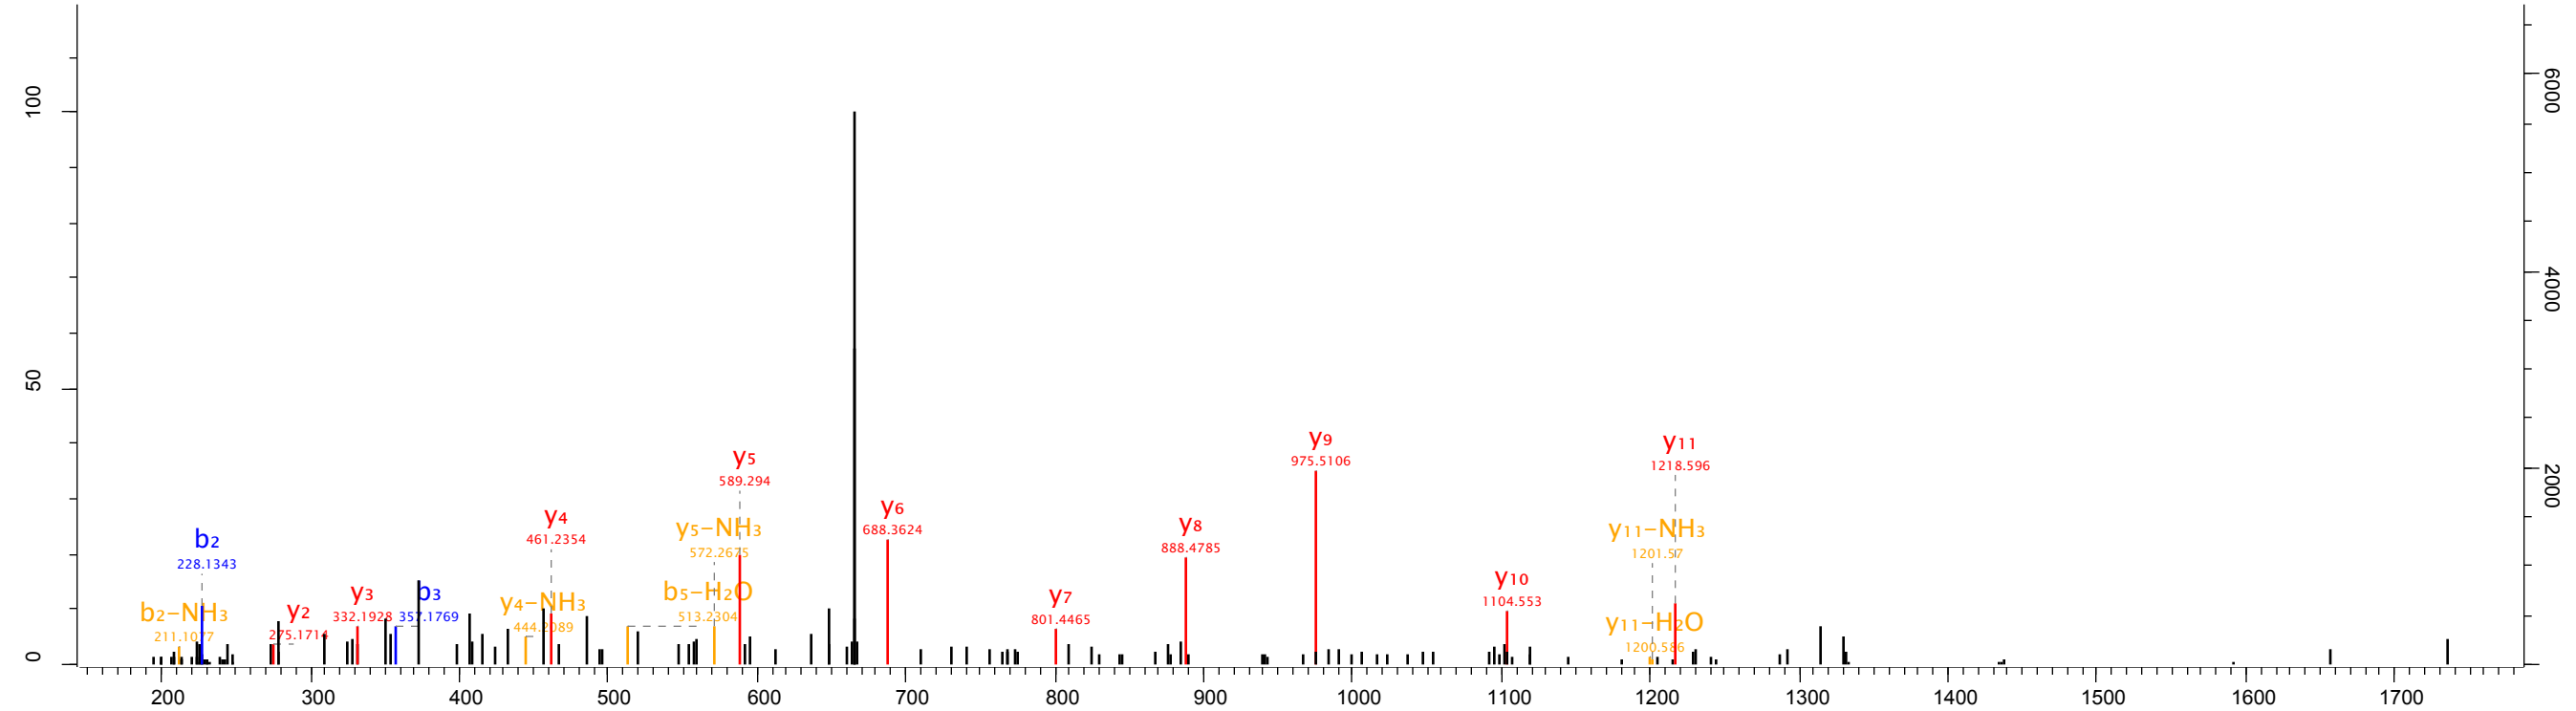

Raw file

UPS1+500ngY\_90minTop17\_BC4\_01\_358

| Scan  | Method   | Score | Mass    | Gene names |
|-------|----------|-------|---------|------------|
| 26594 | TOF; CID | 84.3  | 1253.63 | SBH2       |

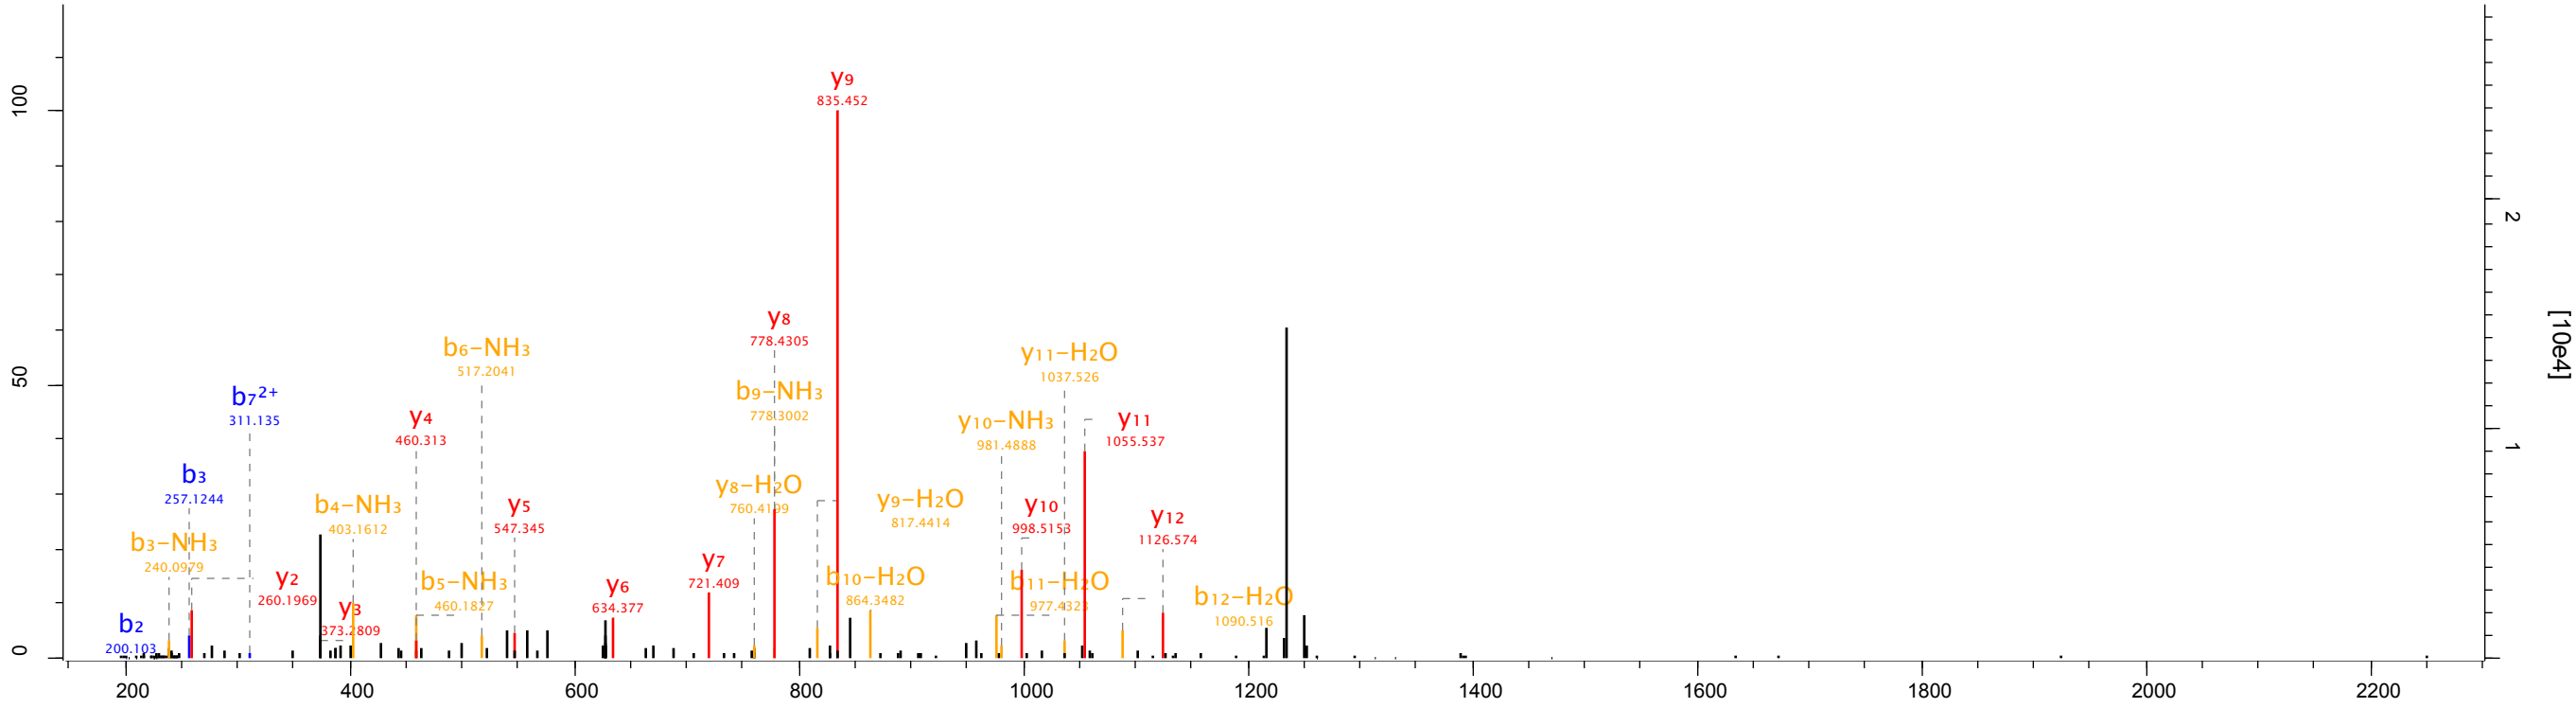

[10e4]

Raw file

UPS1+500ngY\_90minTop17\_BC4\_01\_358

| Scan  | Method   | Score | Mass    | Gene names |
|-------|----------|-------|---------|------------|
| 26725 | TOF; CID | 75.32 | 1462.66 | YGR169C-A  |

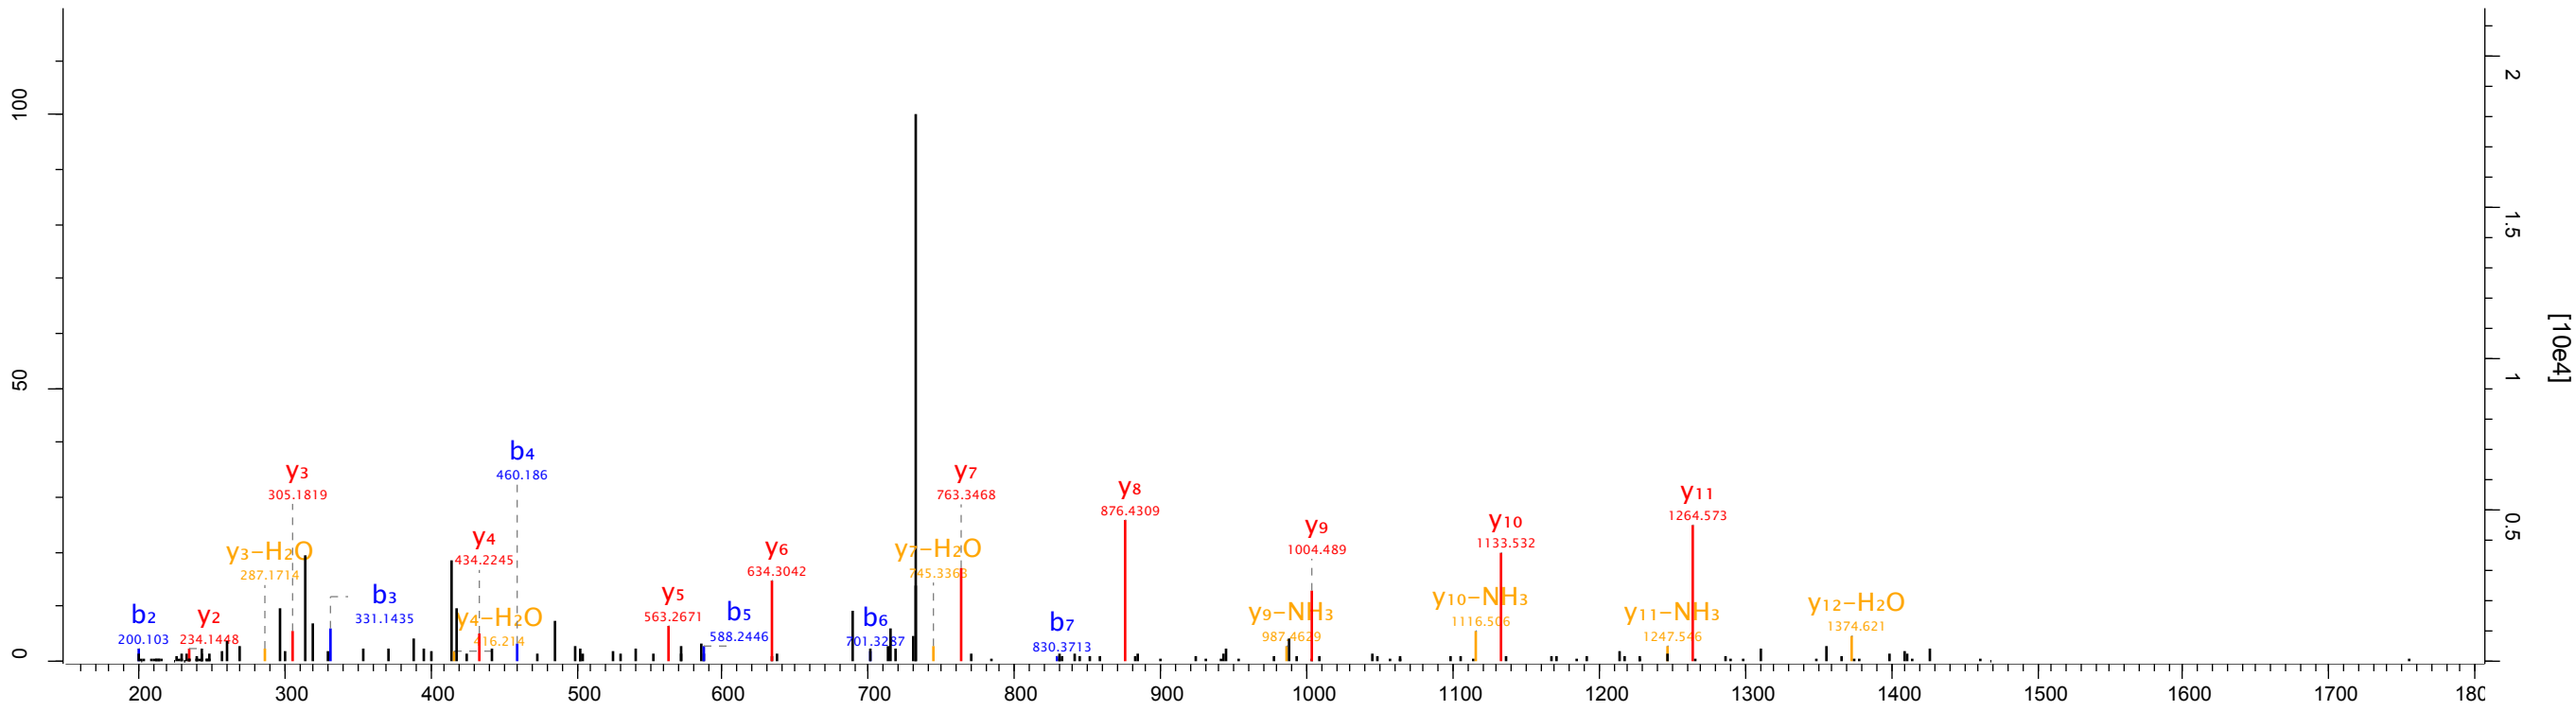

Raw file  
UPS1+500ngY\_90minTop17\_BC4\_01\_358

| Scan  | Method   | Score  | Mass    | Gene names |
|-------|----------|--------|---------|------------|
| 28395 | TOF; CID | 110.56 | 1779.79 | YOS1       |

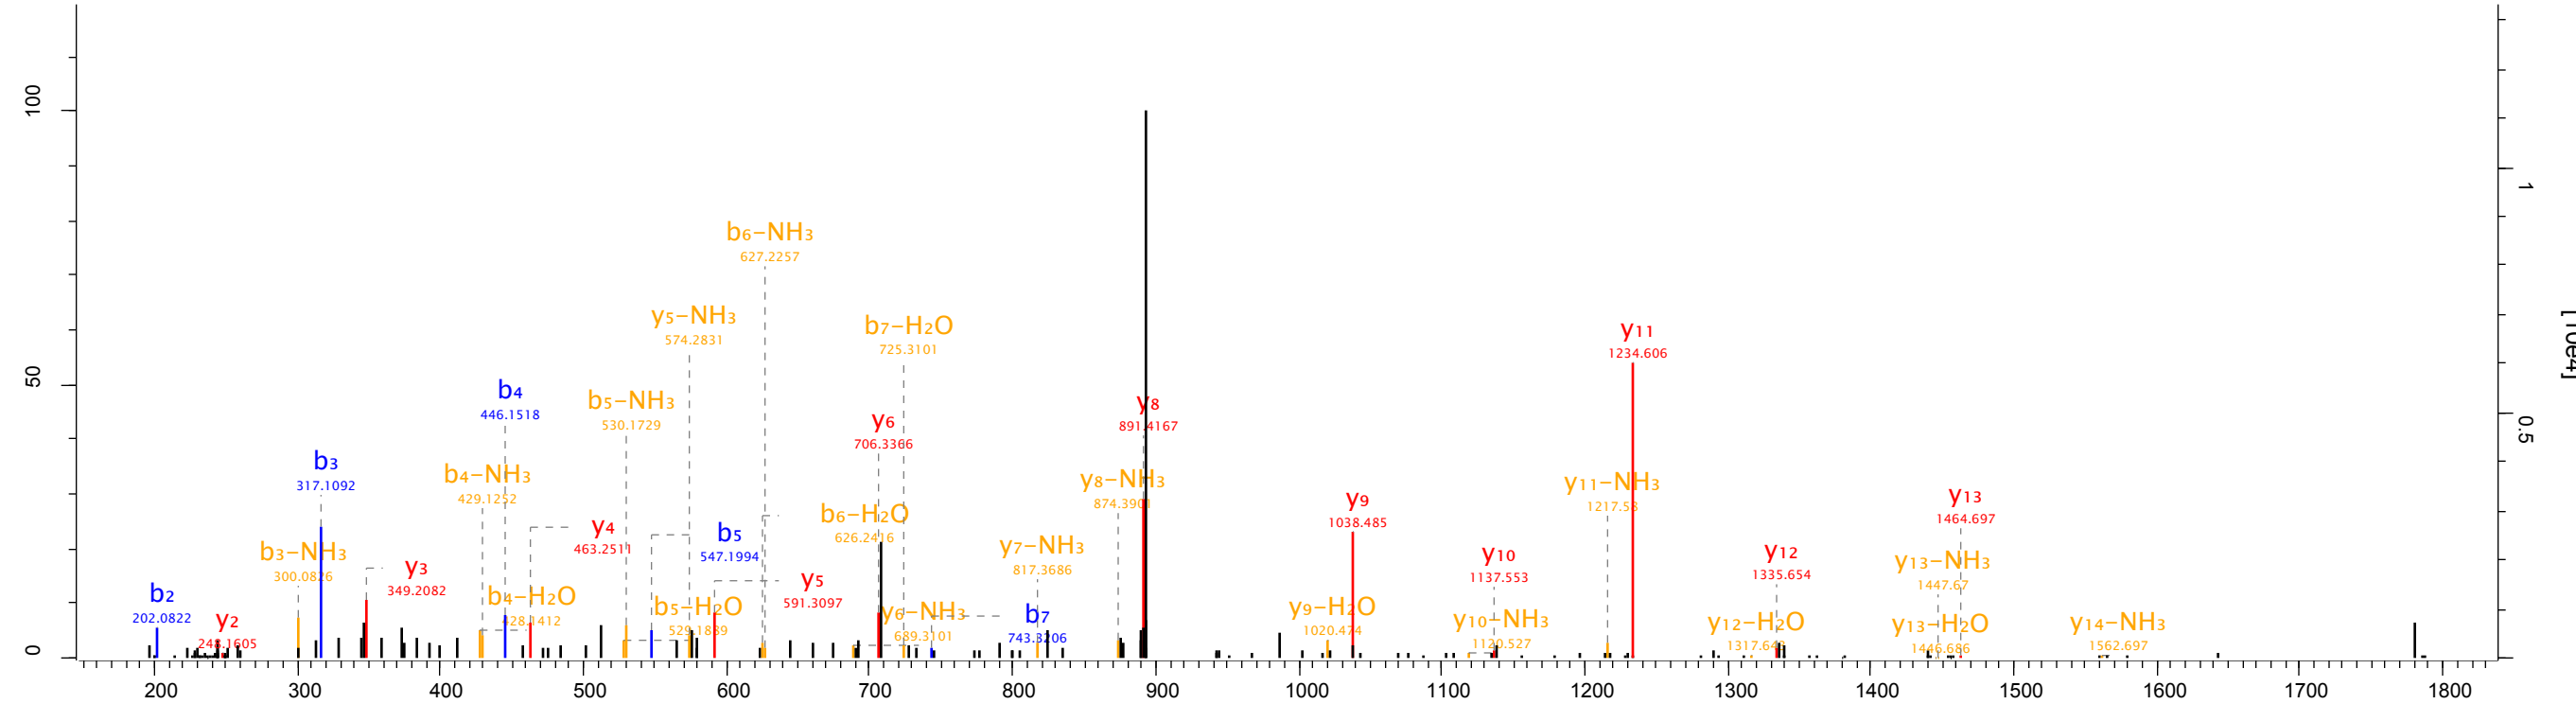

Raw file

UPS1+500ngY\_90minTop17\_BC4\_01\_358

Scan  
28410Method  
TOF; CIDScore  
74.79Mass  
1718.84Gene names  
DFM1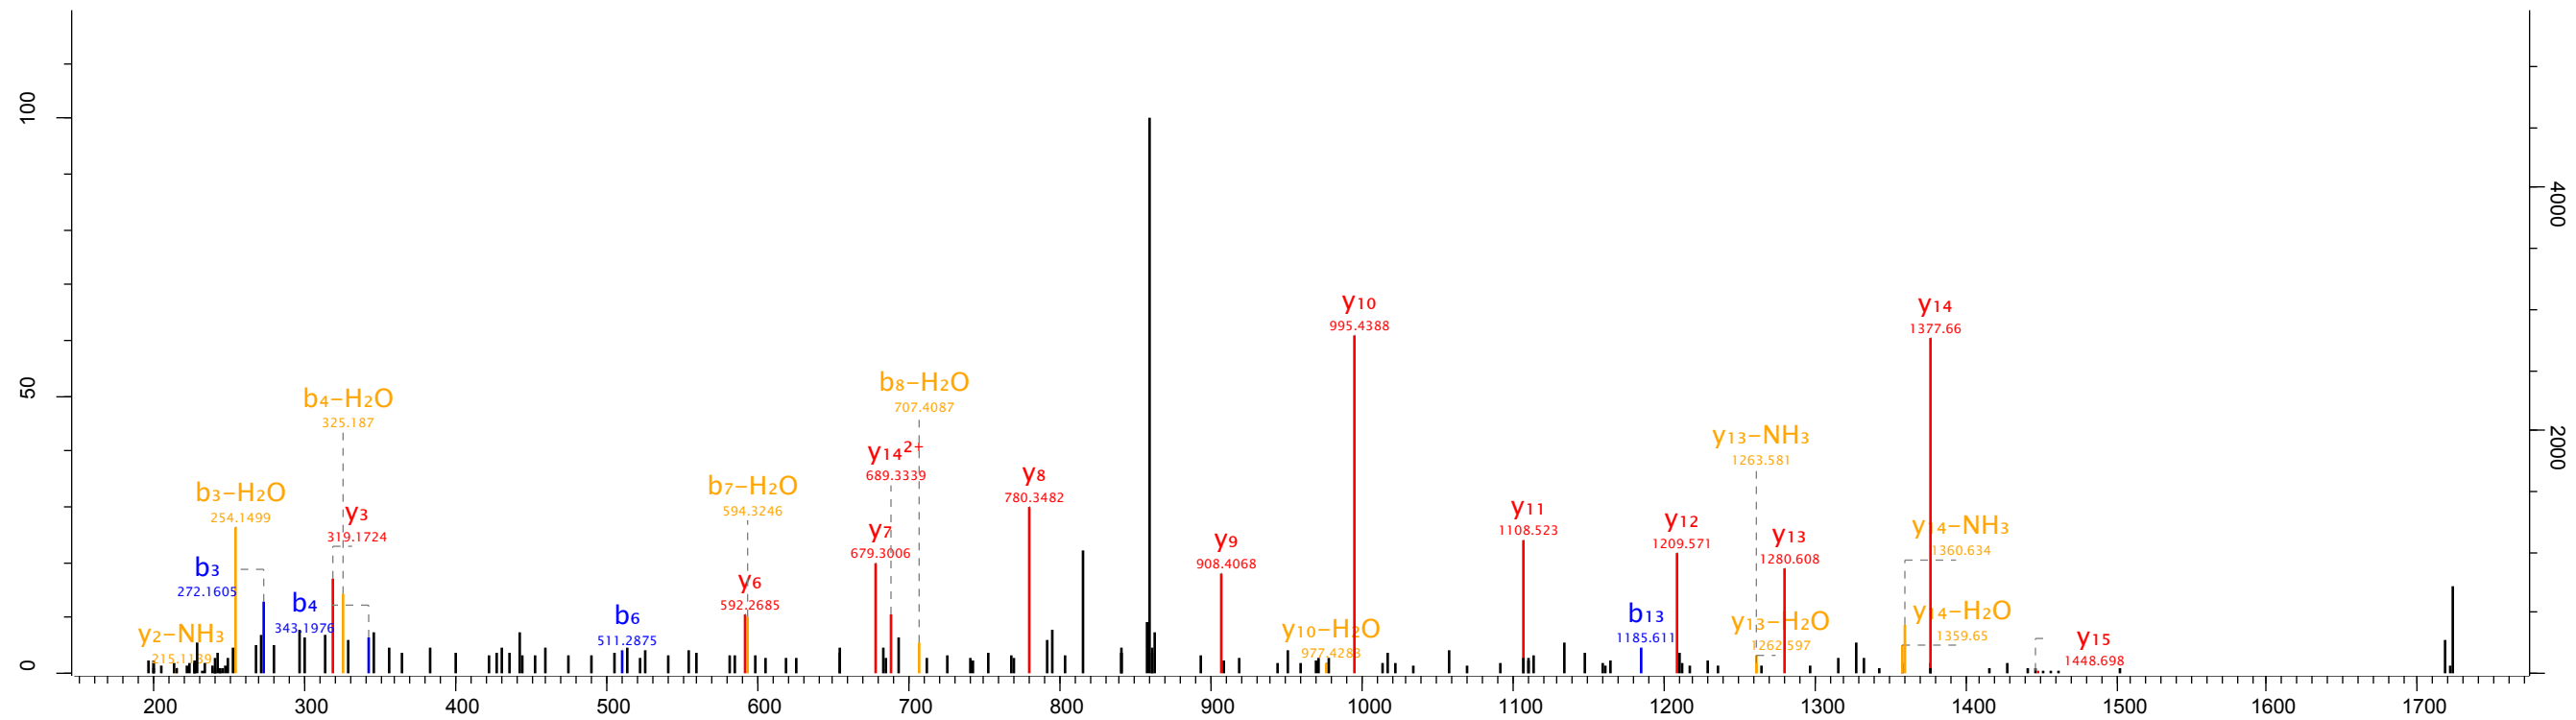

Raw file

UPS1+500ngY\_90minTop17\_BC4\_01\_358

Scan 28470 Method TOF; CID Score 75.89 Mass 1300.59 Gene names NUP133

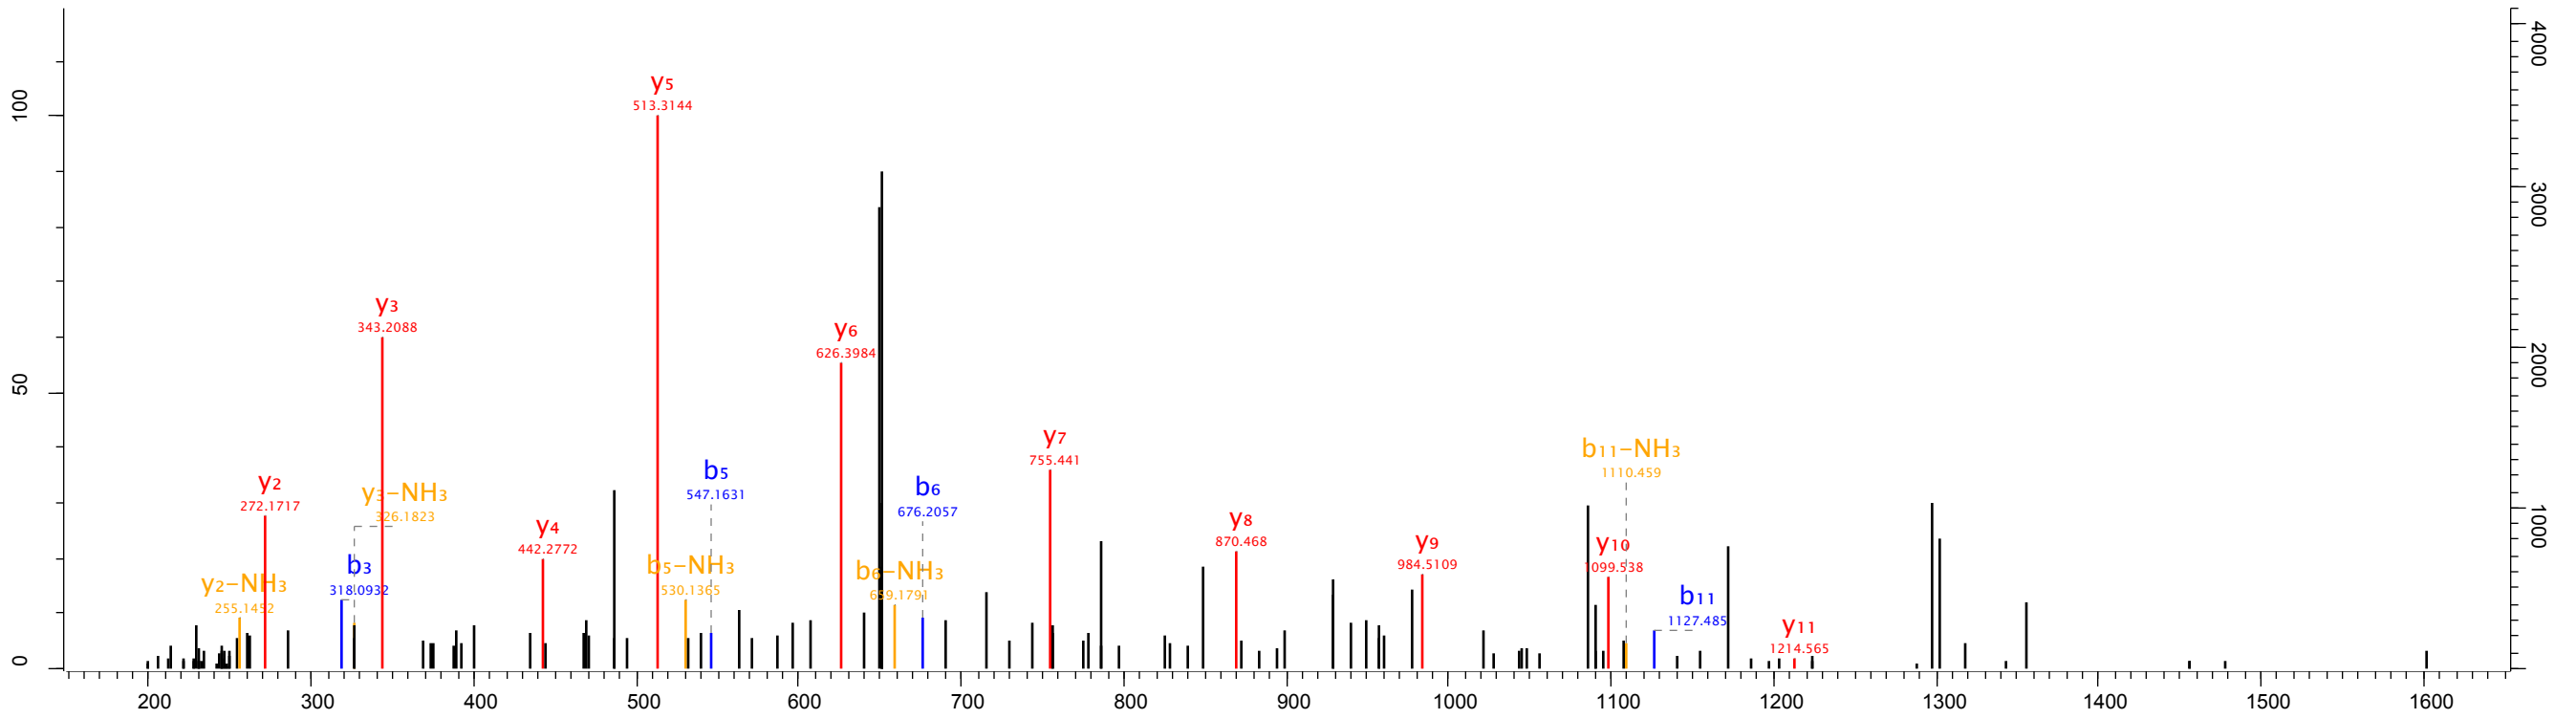

Raw file  
UPS1+500ngY\_90minTop17\_BC4\_01\_358

Scan 29814 Method TOF; CID Score 68.17 Mass 1582.66

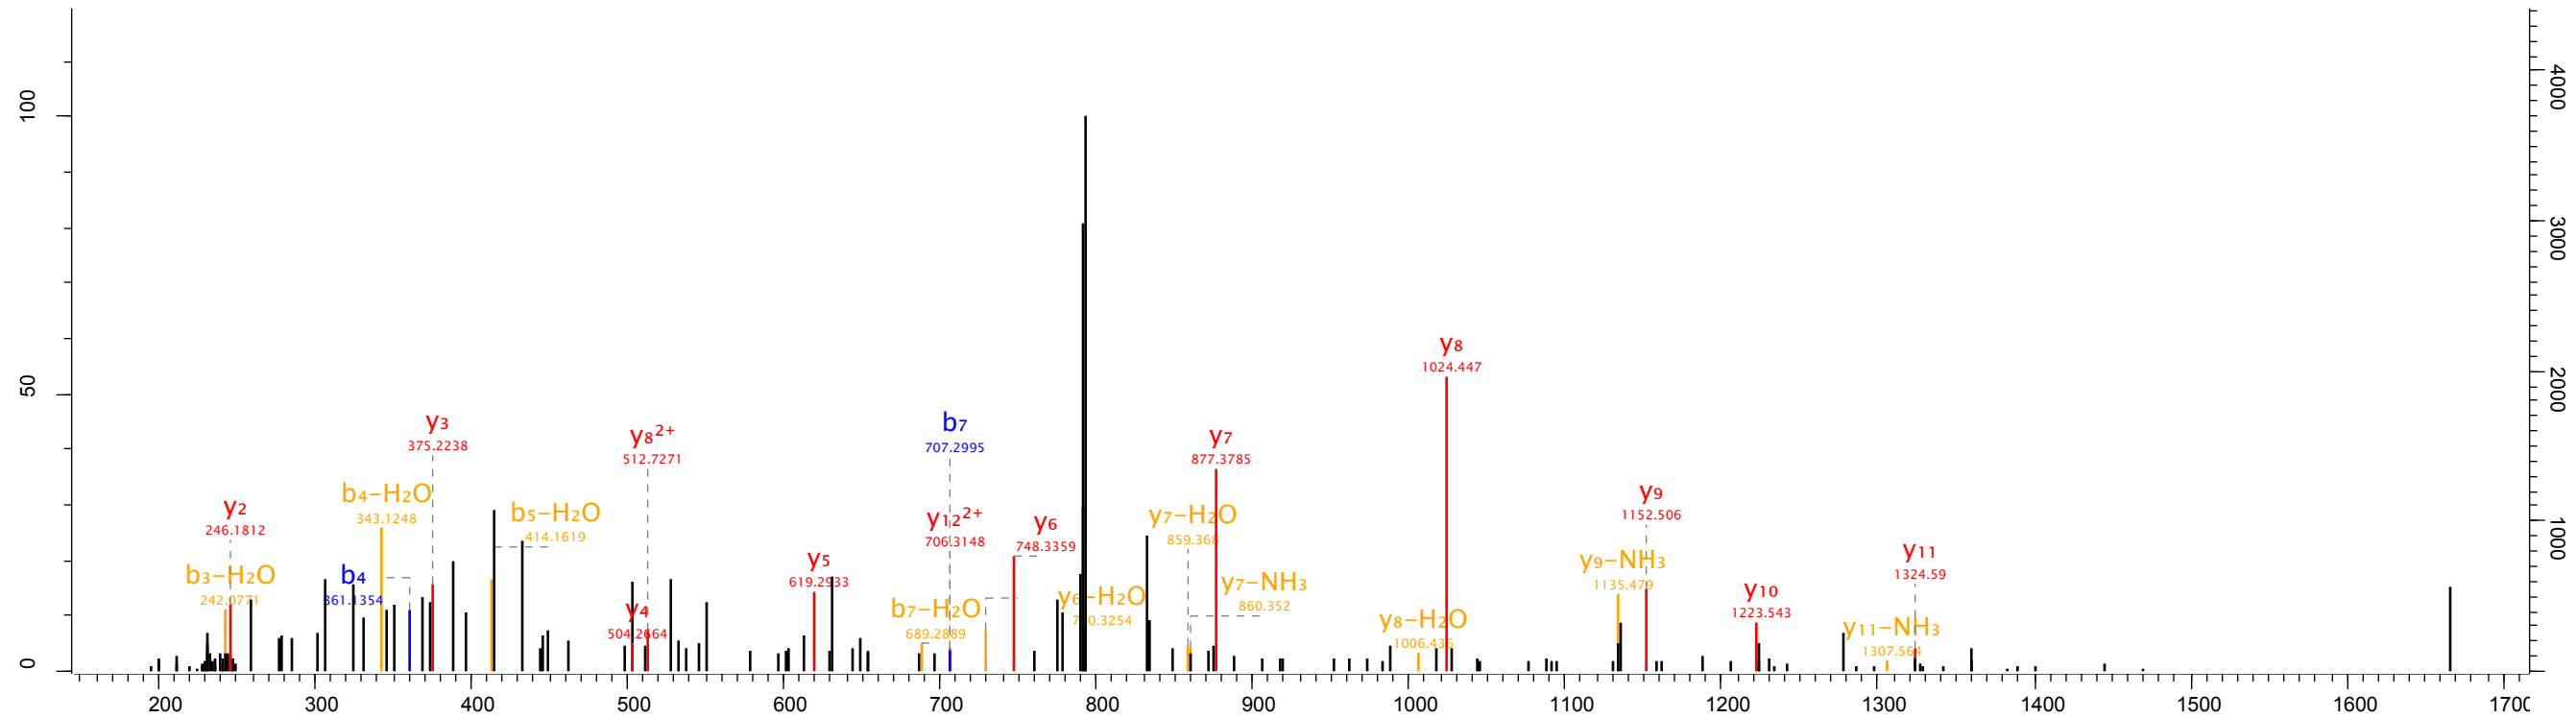



Raw file

UPS1+500ngY\_90minTop17\_BC4\_01\_358

Scan

30820

Method

TOF; CID

Score

64.22

Mass

1227.58

Gene names

CWP1

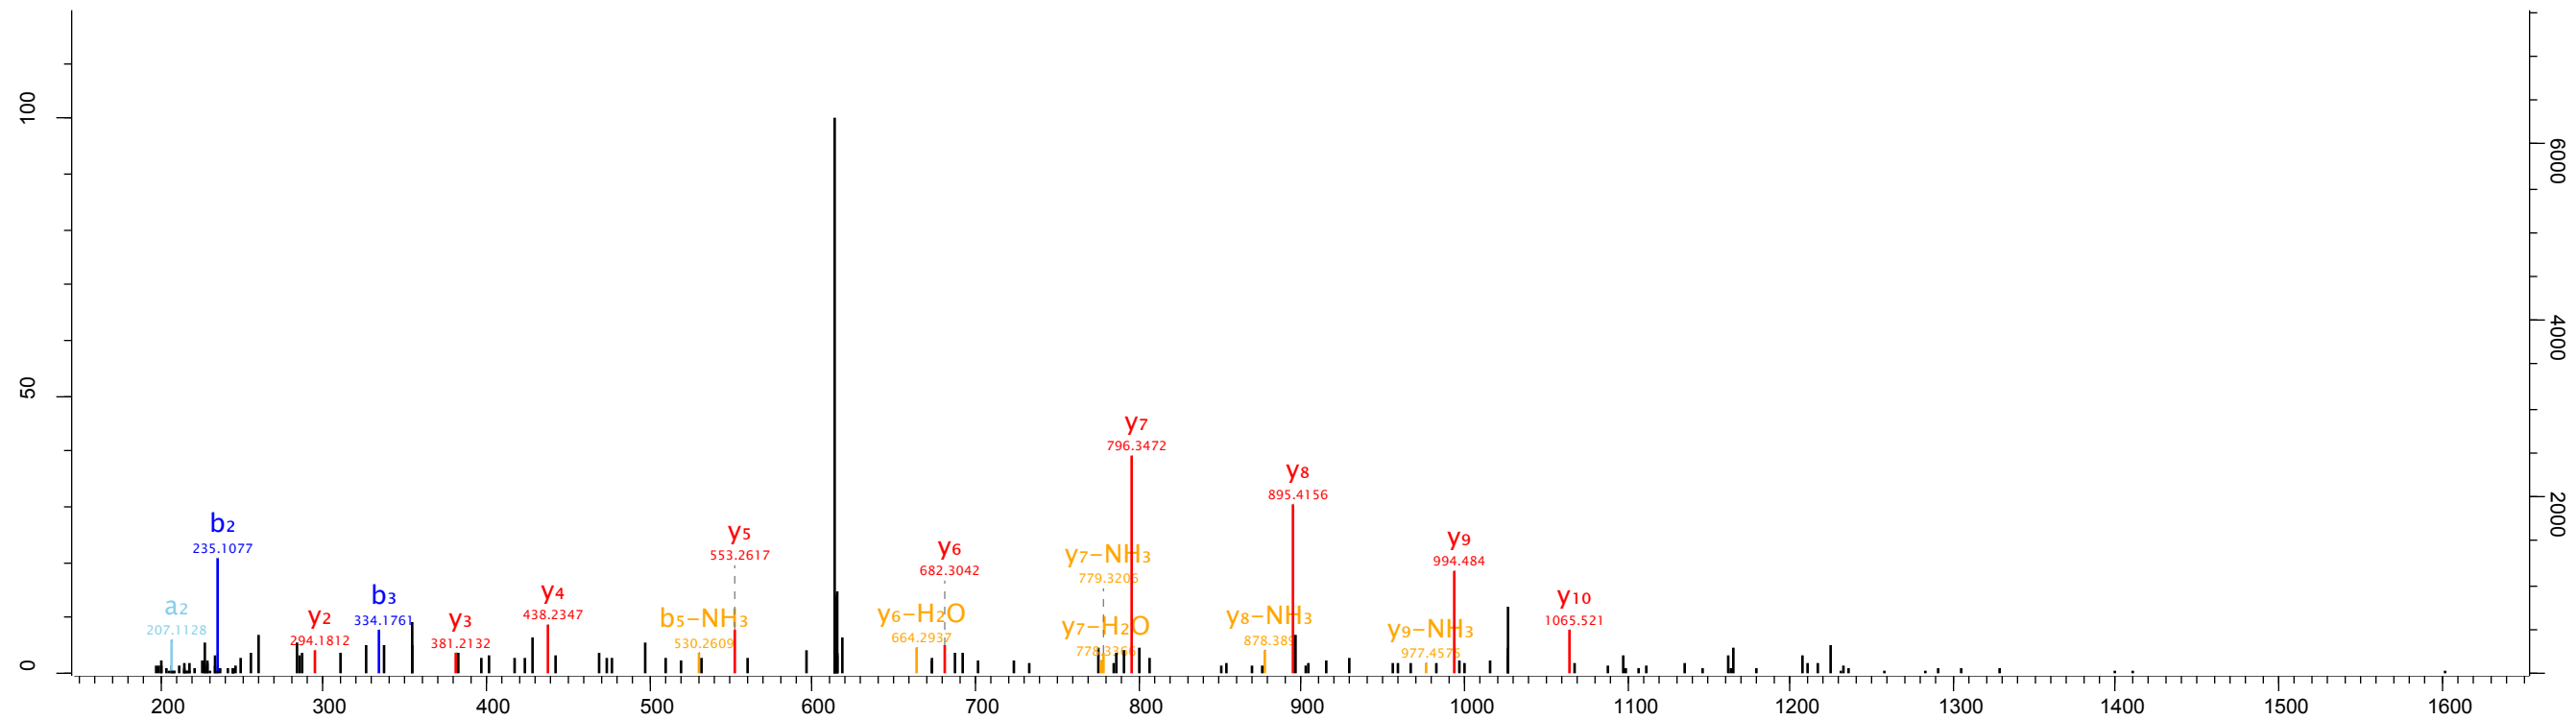

Raw file  
UPS1+500ngY\_90minTop17\_BC4\_01\_358

Scan 31028 Method TOF; CID Score 49.59 Mass 1564.71 Gene names SEC11

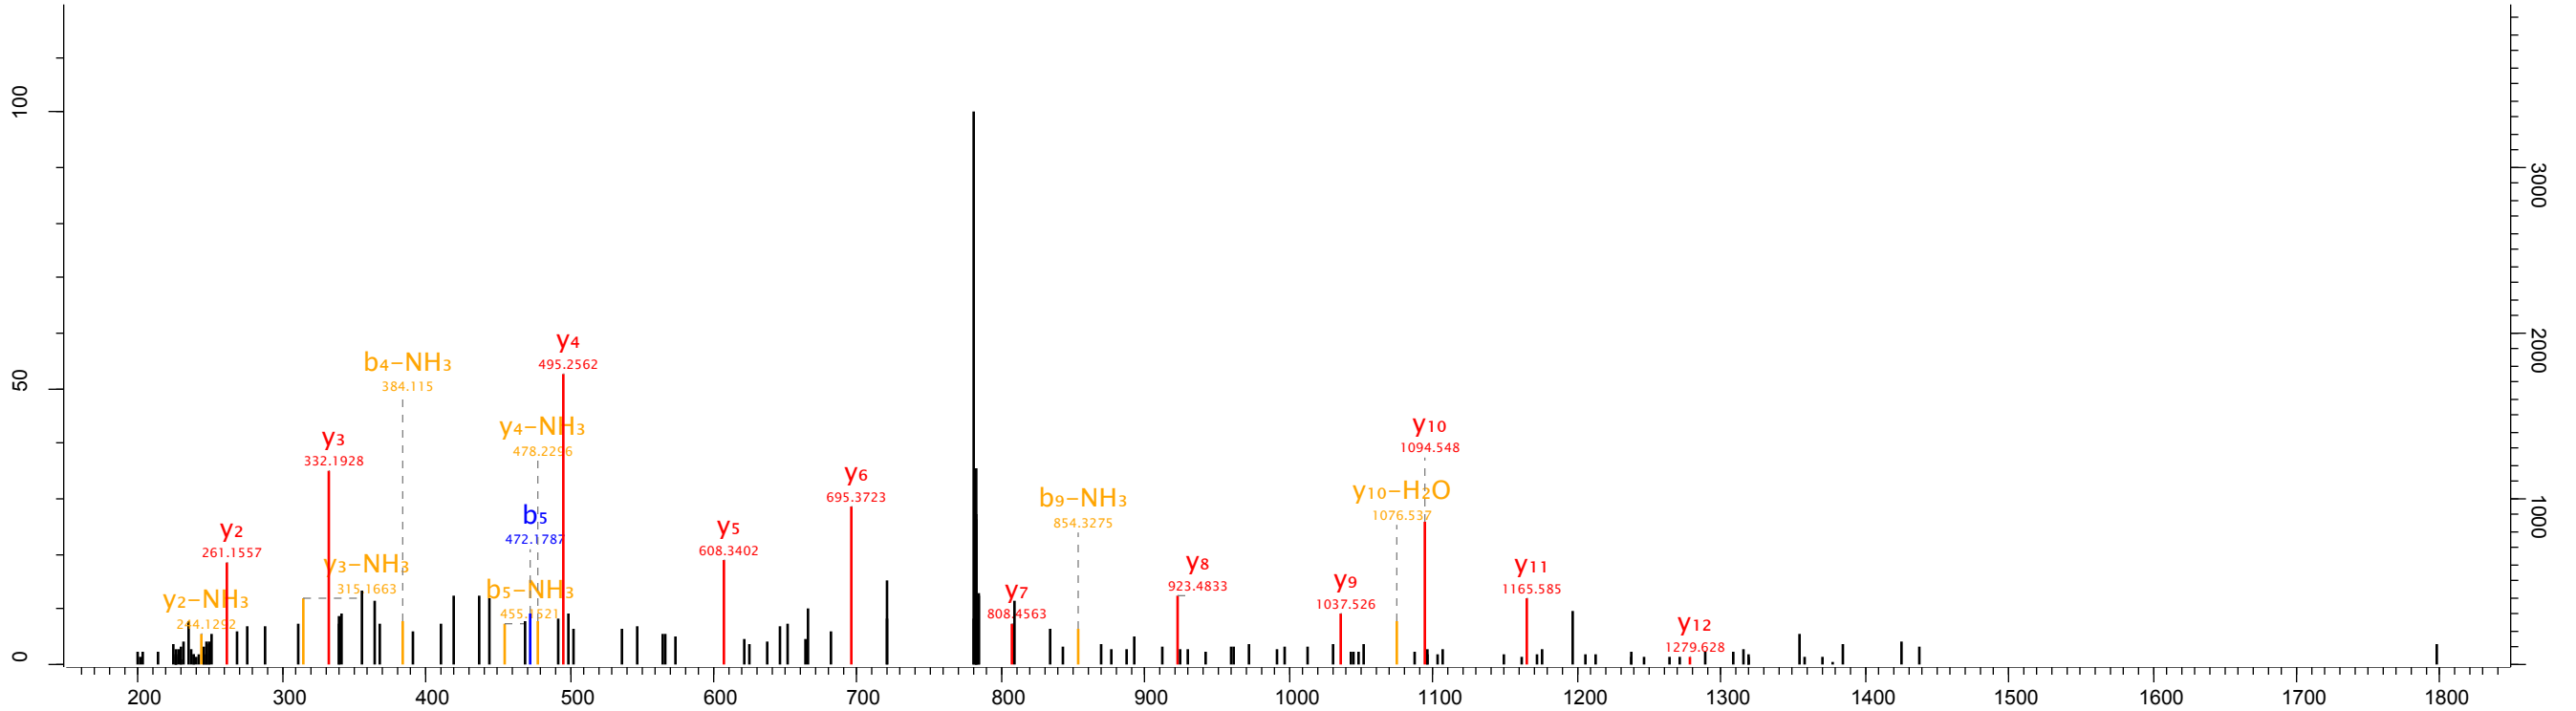

Raw file  
UPS1+500ngY\_90minTop17\_BC4\_01\_358

| Scan  | Method   | Score | Mass    | Gene names |
|-------|----------|-------|---------|------------|
| 31118 | TOF; CID | 62.09 | 1453.65 | MID2       |

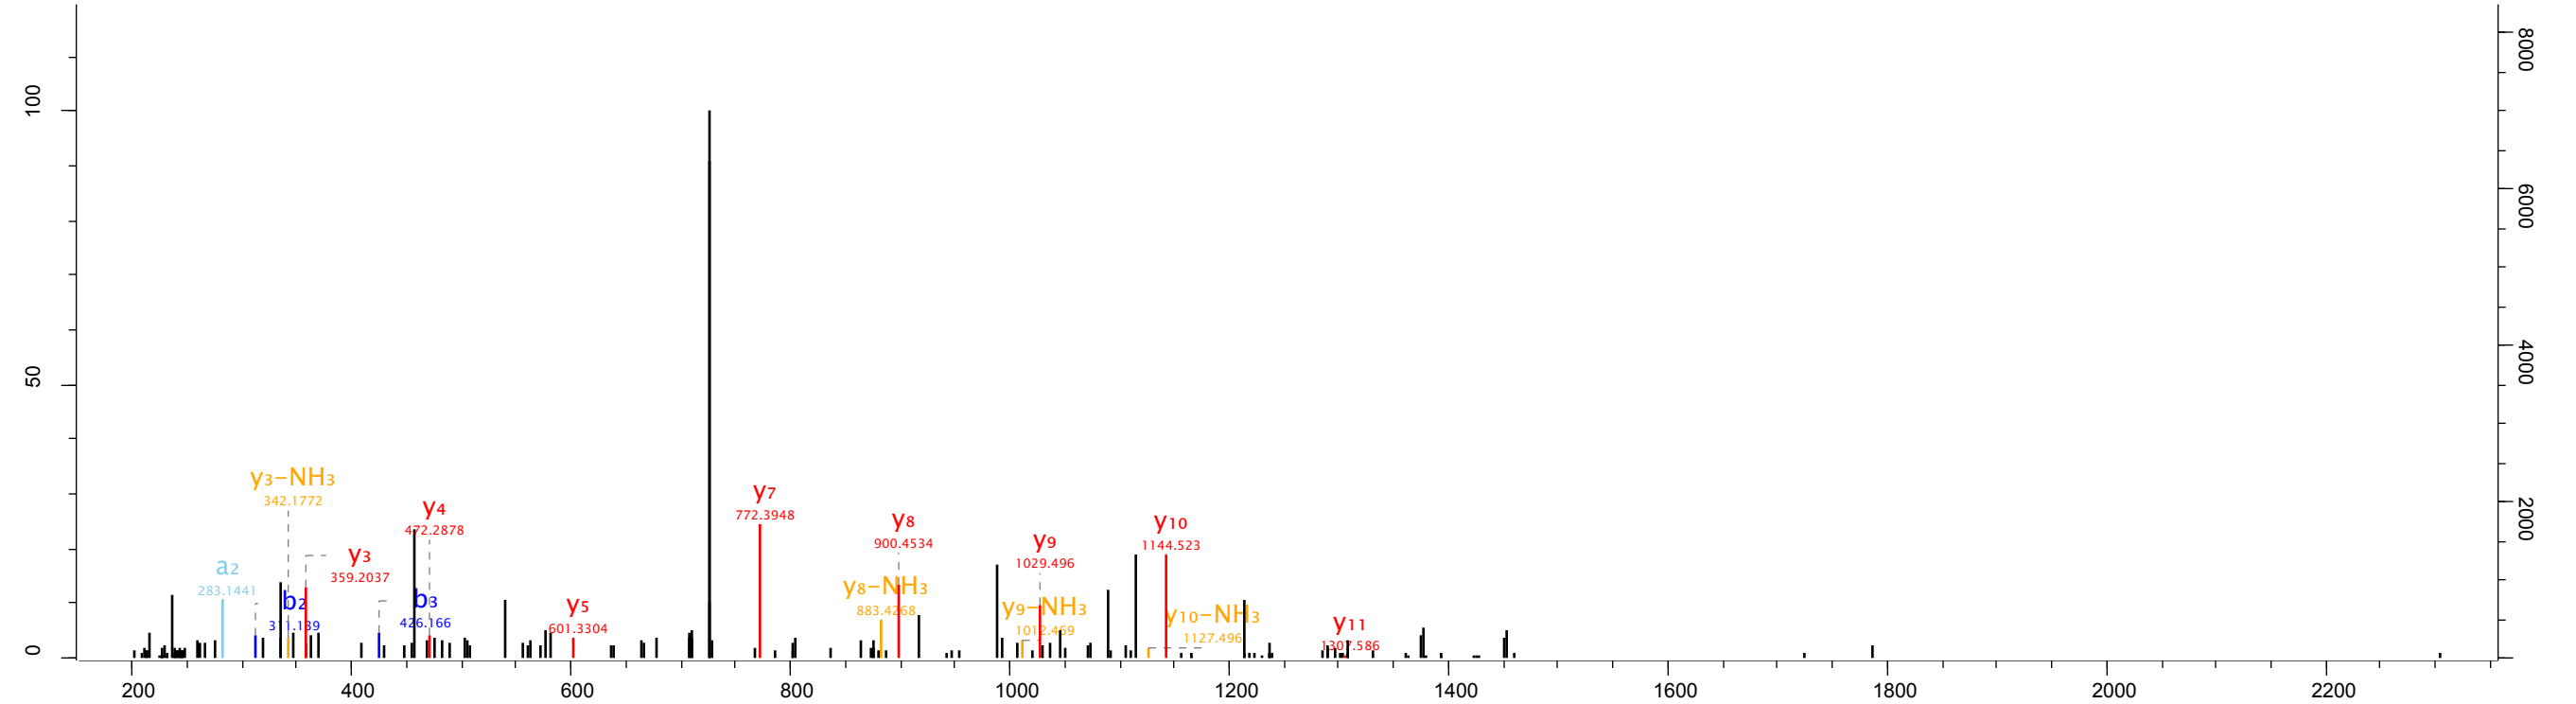

Raw file  
UPS1+500ngY\_90minTop17\_BC4\_01\_358

| Scan  | Method   | Score | Mass    | Gene names |
|-------|----------|-------|---------|------------|
| 31363 | TOF; CID | 74.39 | 1350.61 | ATP15      |

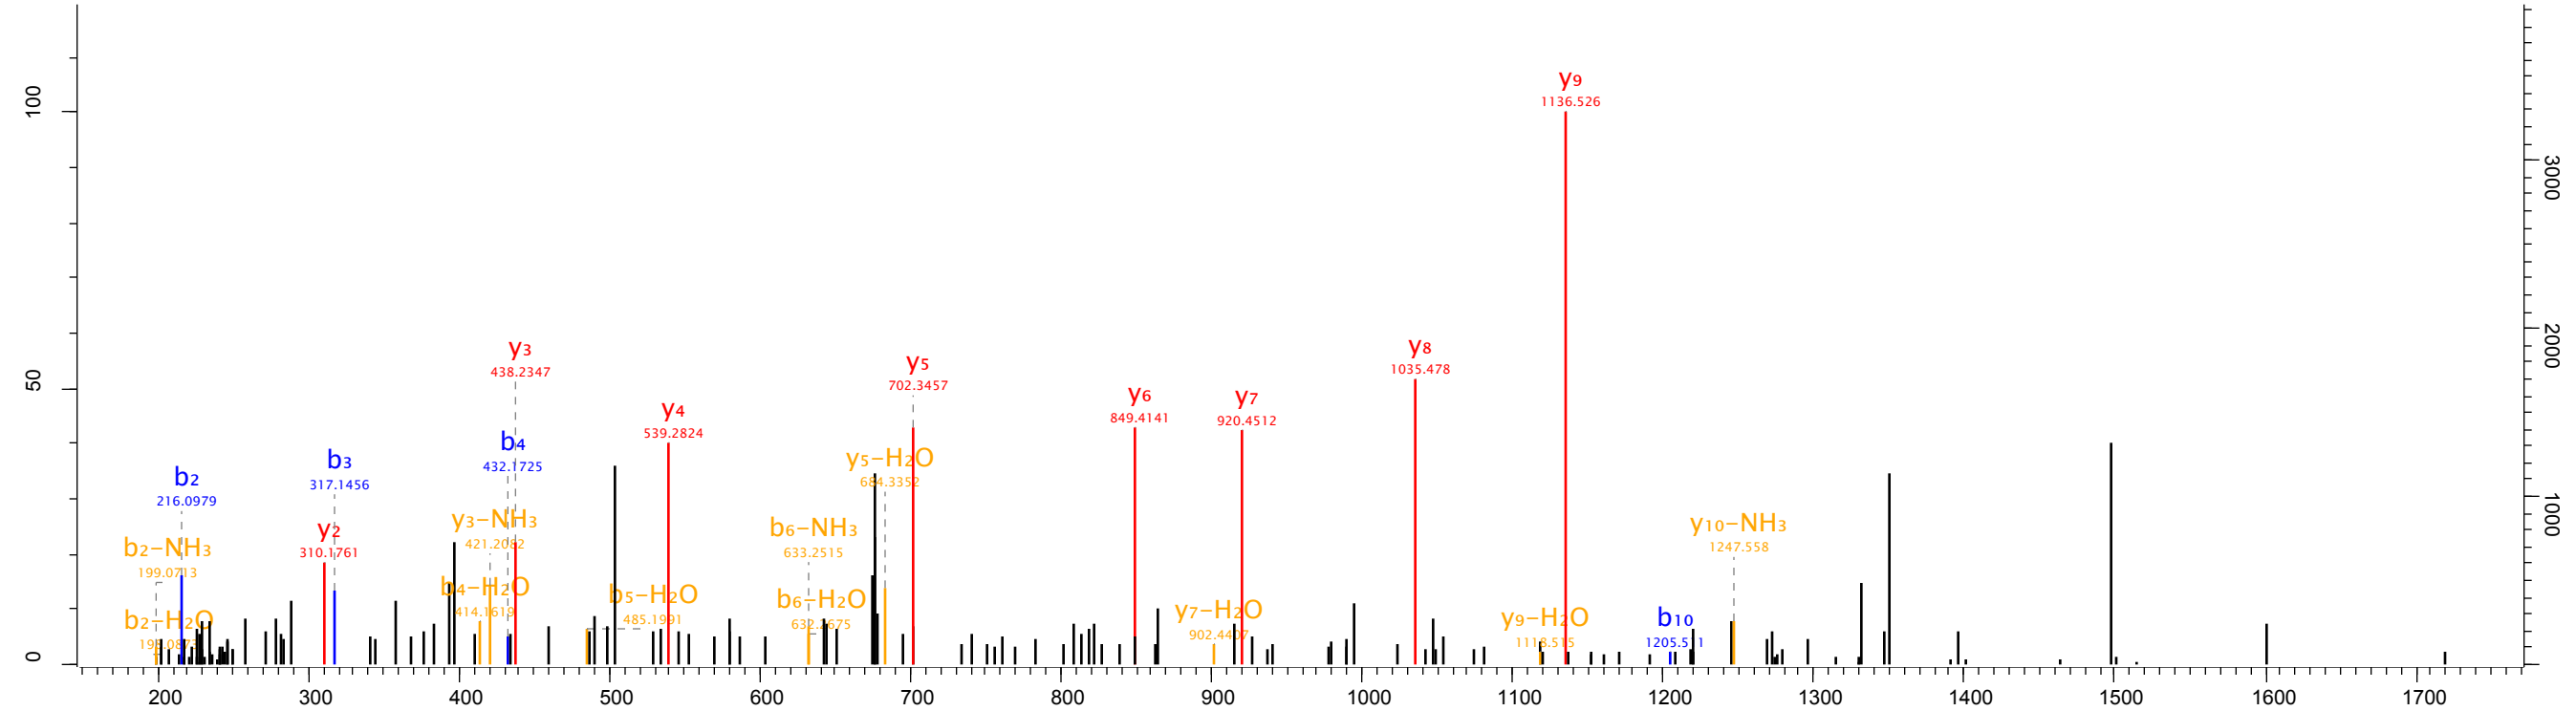

Raw file  
UPS1+500ngY\_90minTop17\_BC4\_01\_358

| Scan  | Method   | Score | Mass    | Gene names |
|-------|----------|-------|---------|------------|
| 31766 | TOF; CID | 84.3  | 1614.68 | SNA2       |

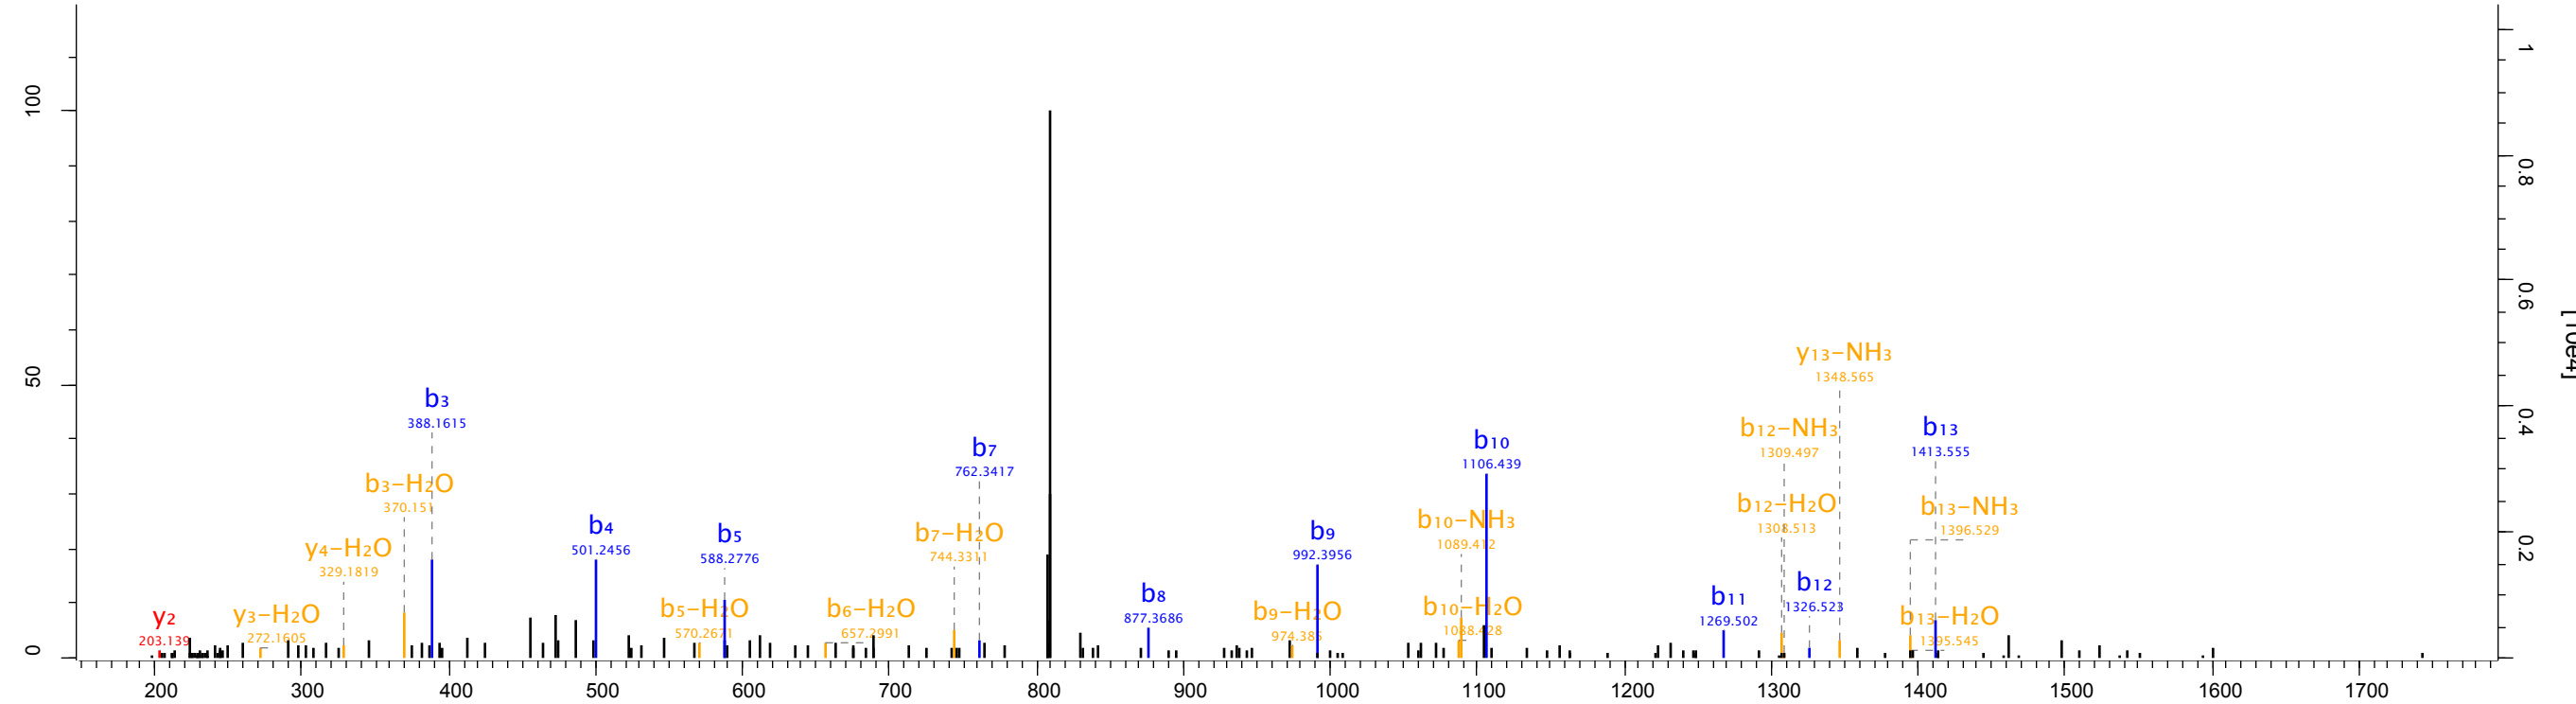

Raw file

UPS1+500ngY\_90minTop17\_BC4\_01\_358

Scan  
32280Method  
TOF; CIDScore  
78.81Mass  
1568.7Gene names  
XKS1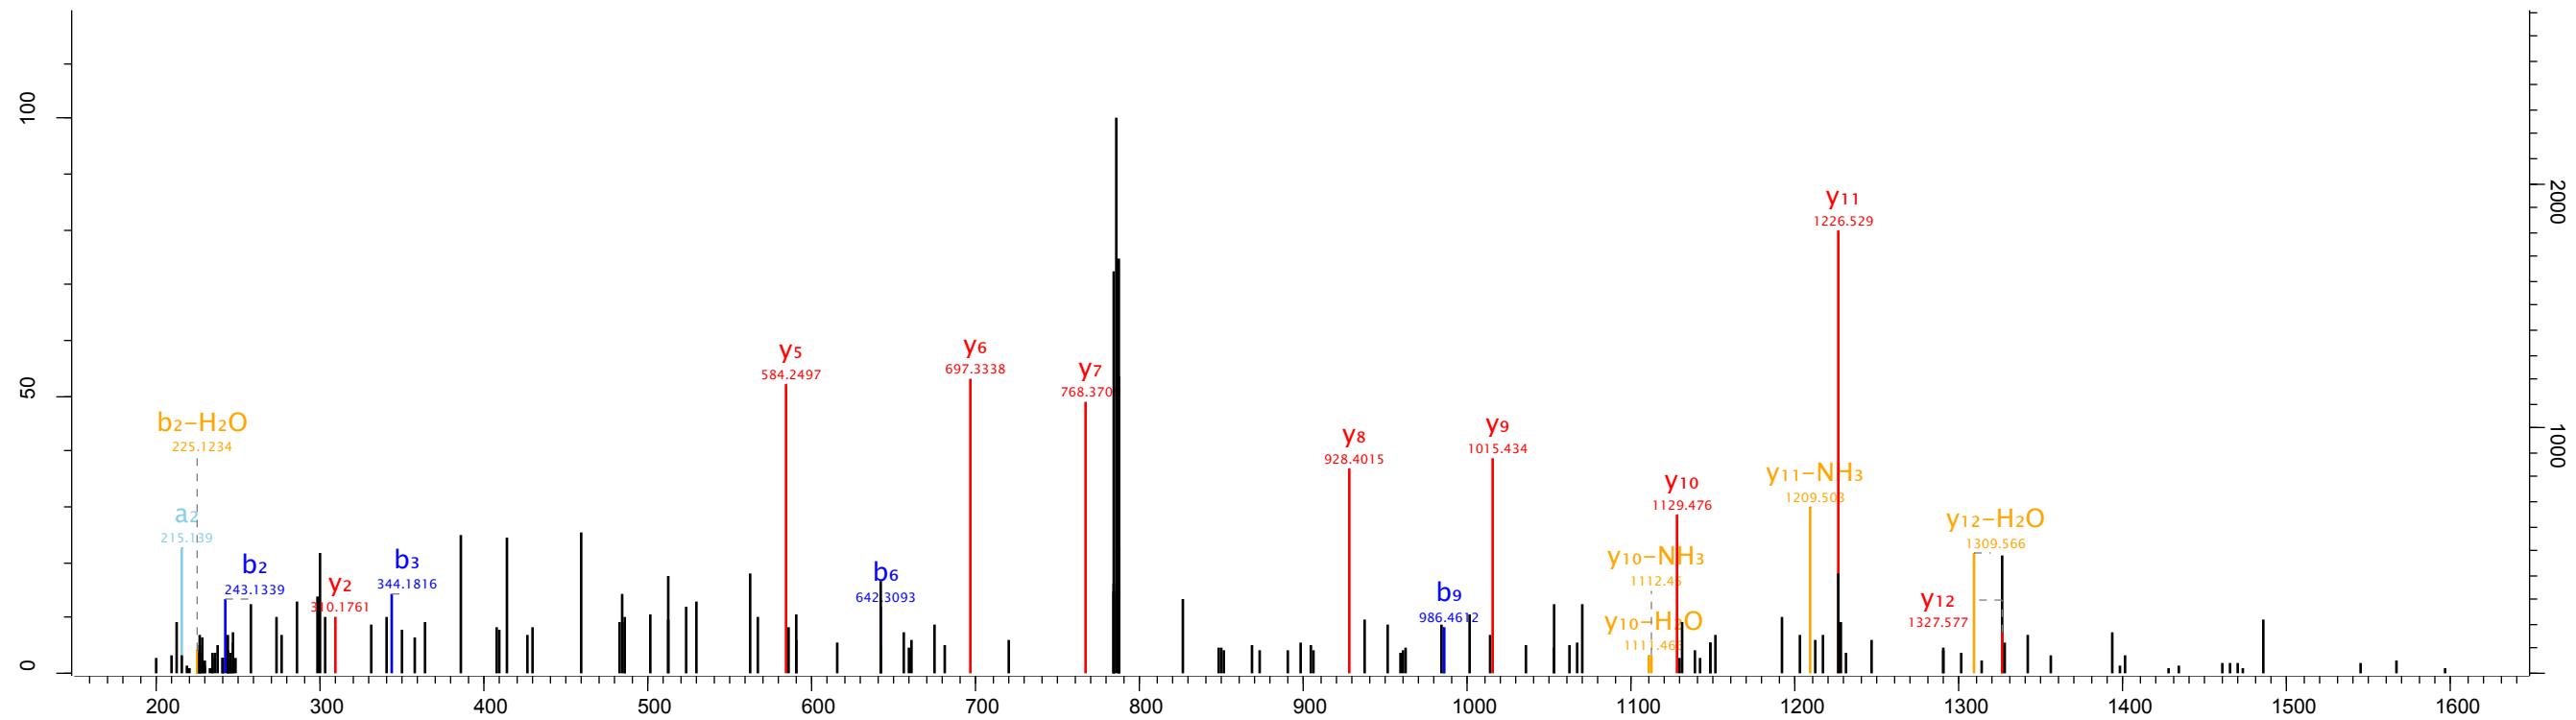

Raw file

UPS1+500ngY\_90minTop17\_BC4\_01\_358

Scan

Method

Score

Mass

Gene names

32331

TOF; CID

94.78

1556.64

CDC73

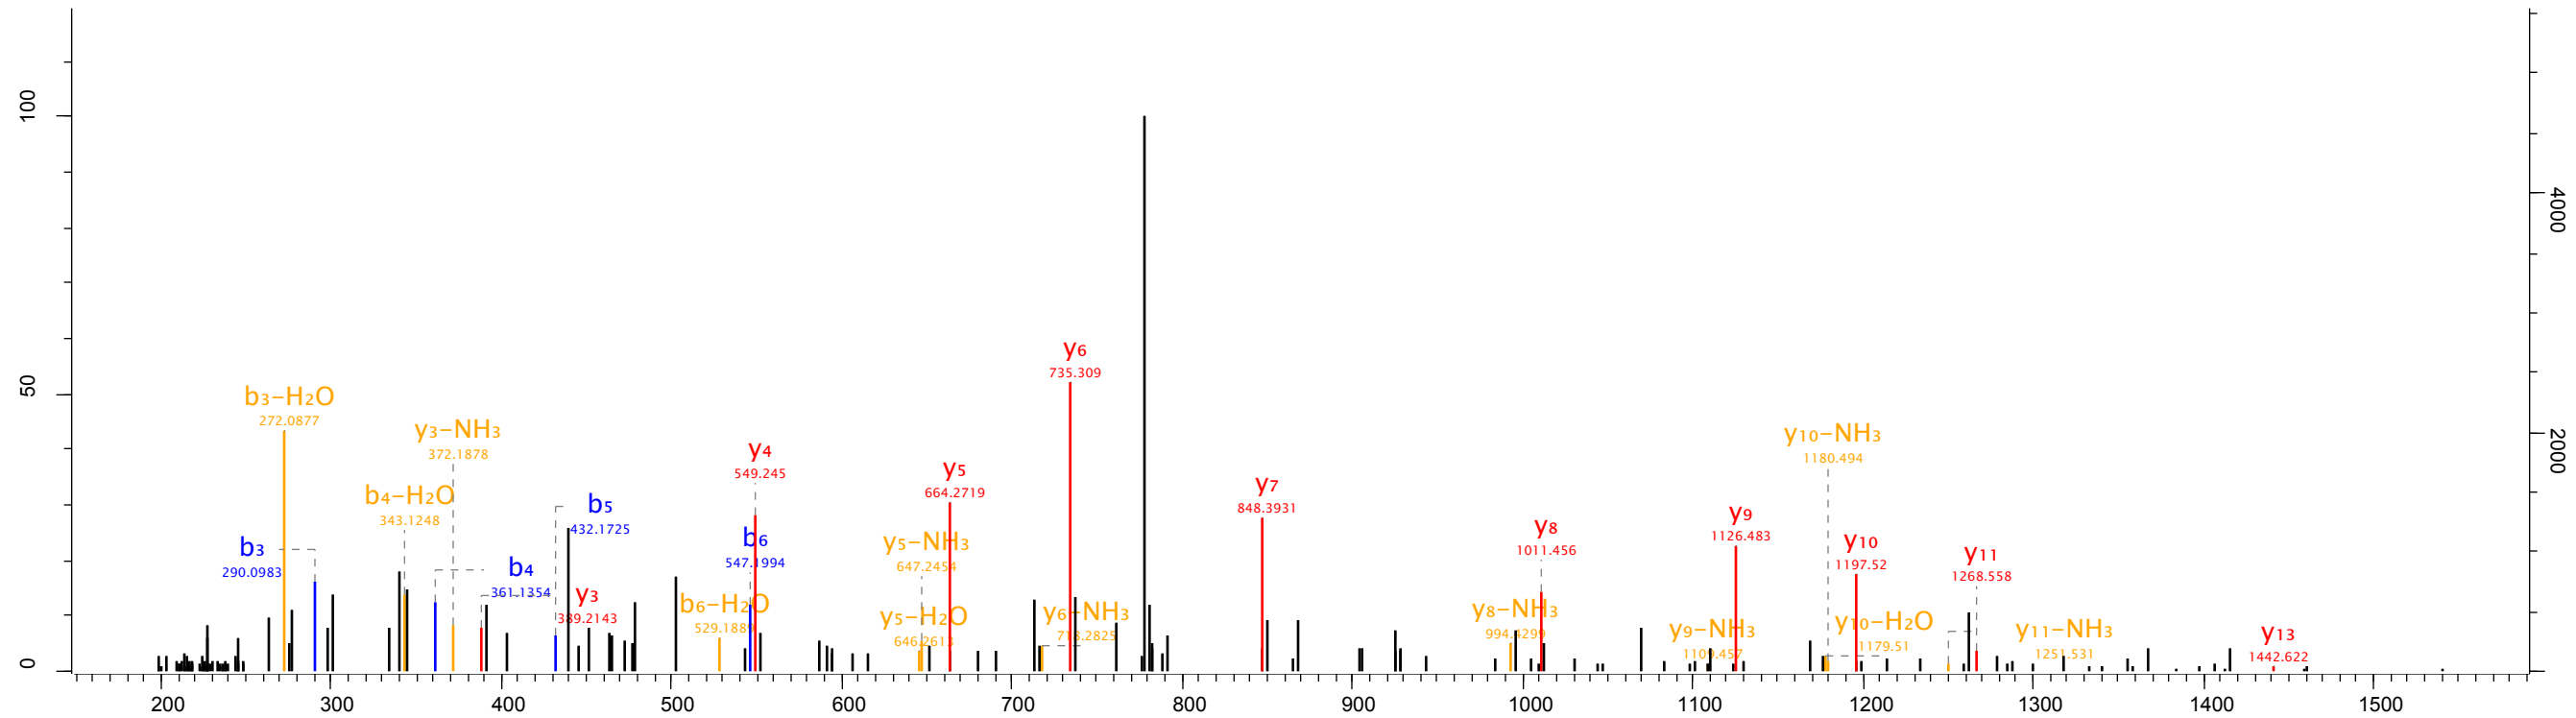

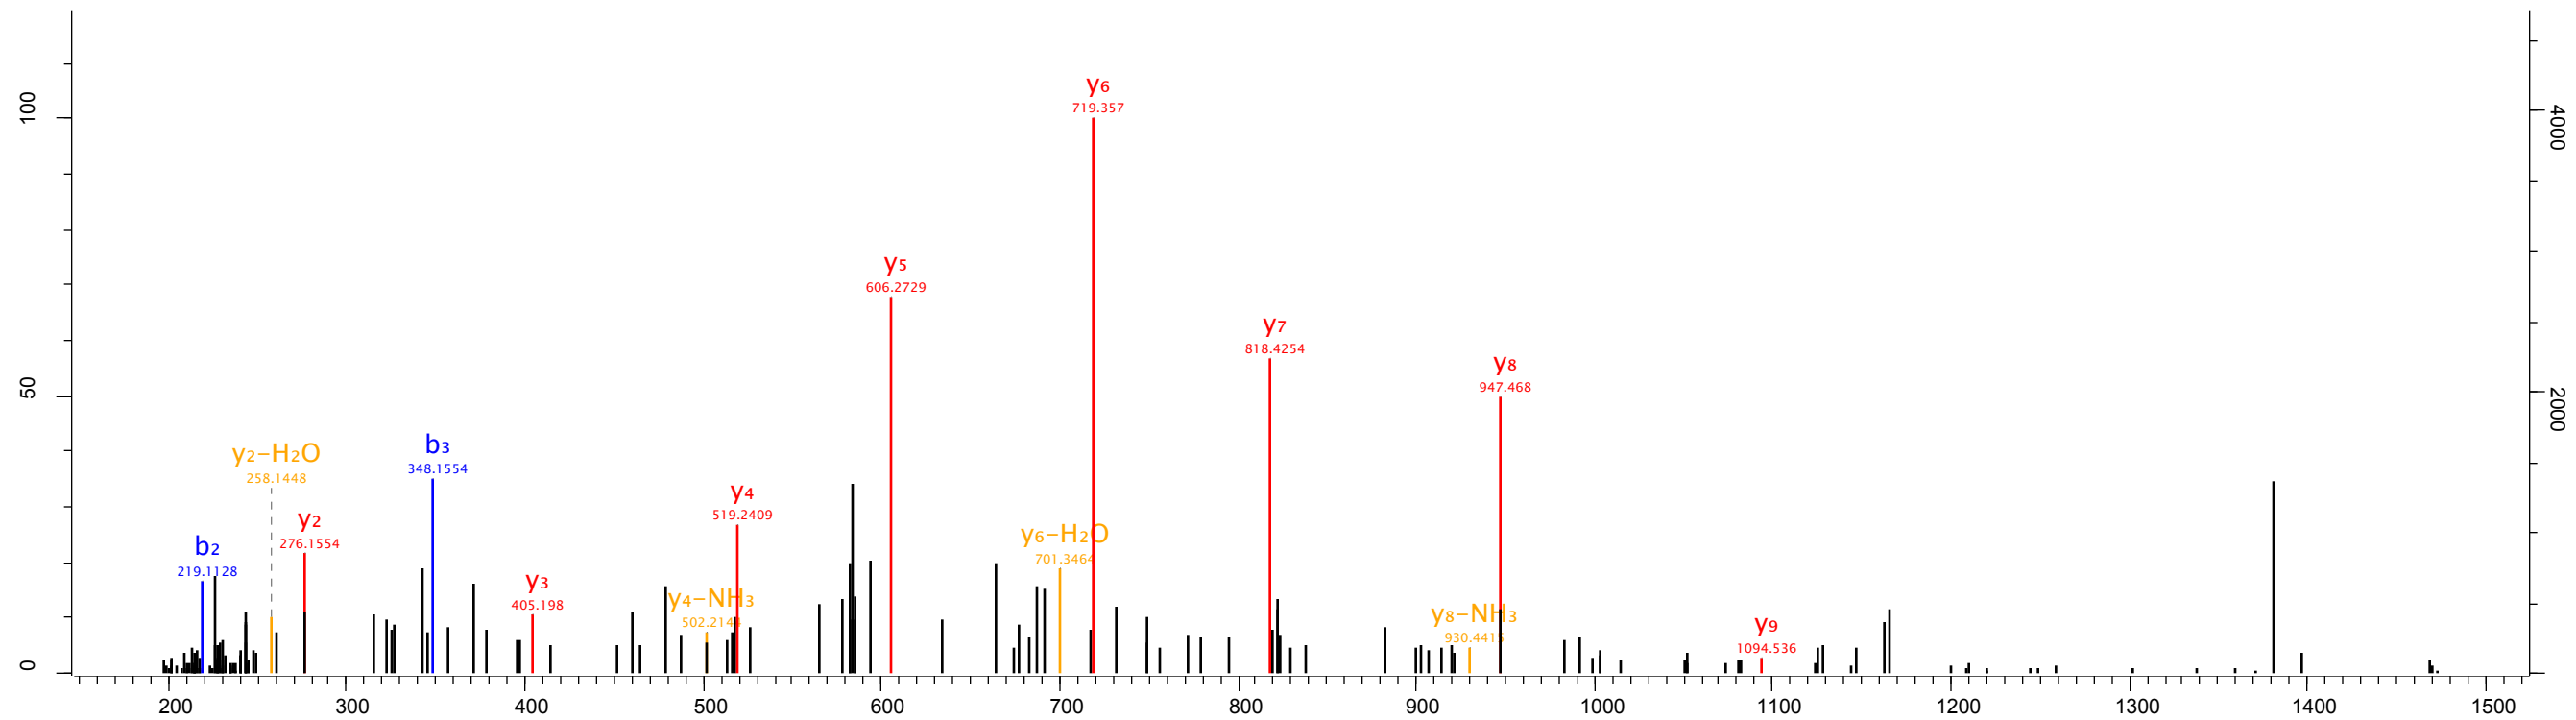



Raw file  
UPS1+500ngY\_90minTop17\_BC4\_01\_358

| Scan  | Method   | Score | Mass    | Gene names |
|-------|----------|-------|---------|------------|
| 32523 | TOF; CID | 62.16 | 1437.67 | SED4       |

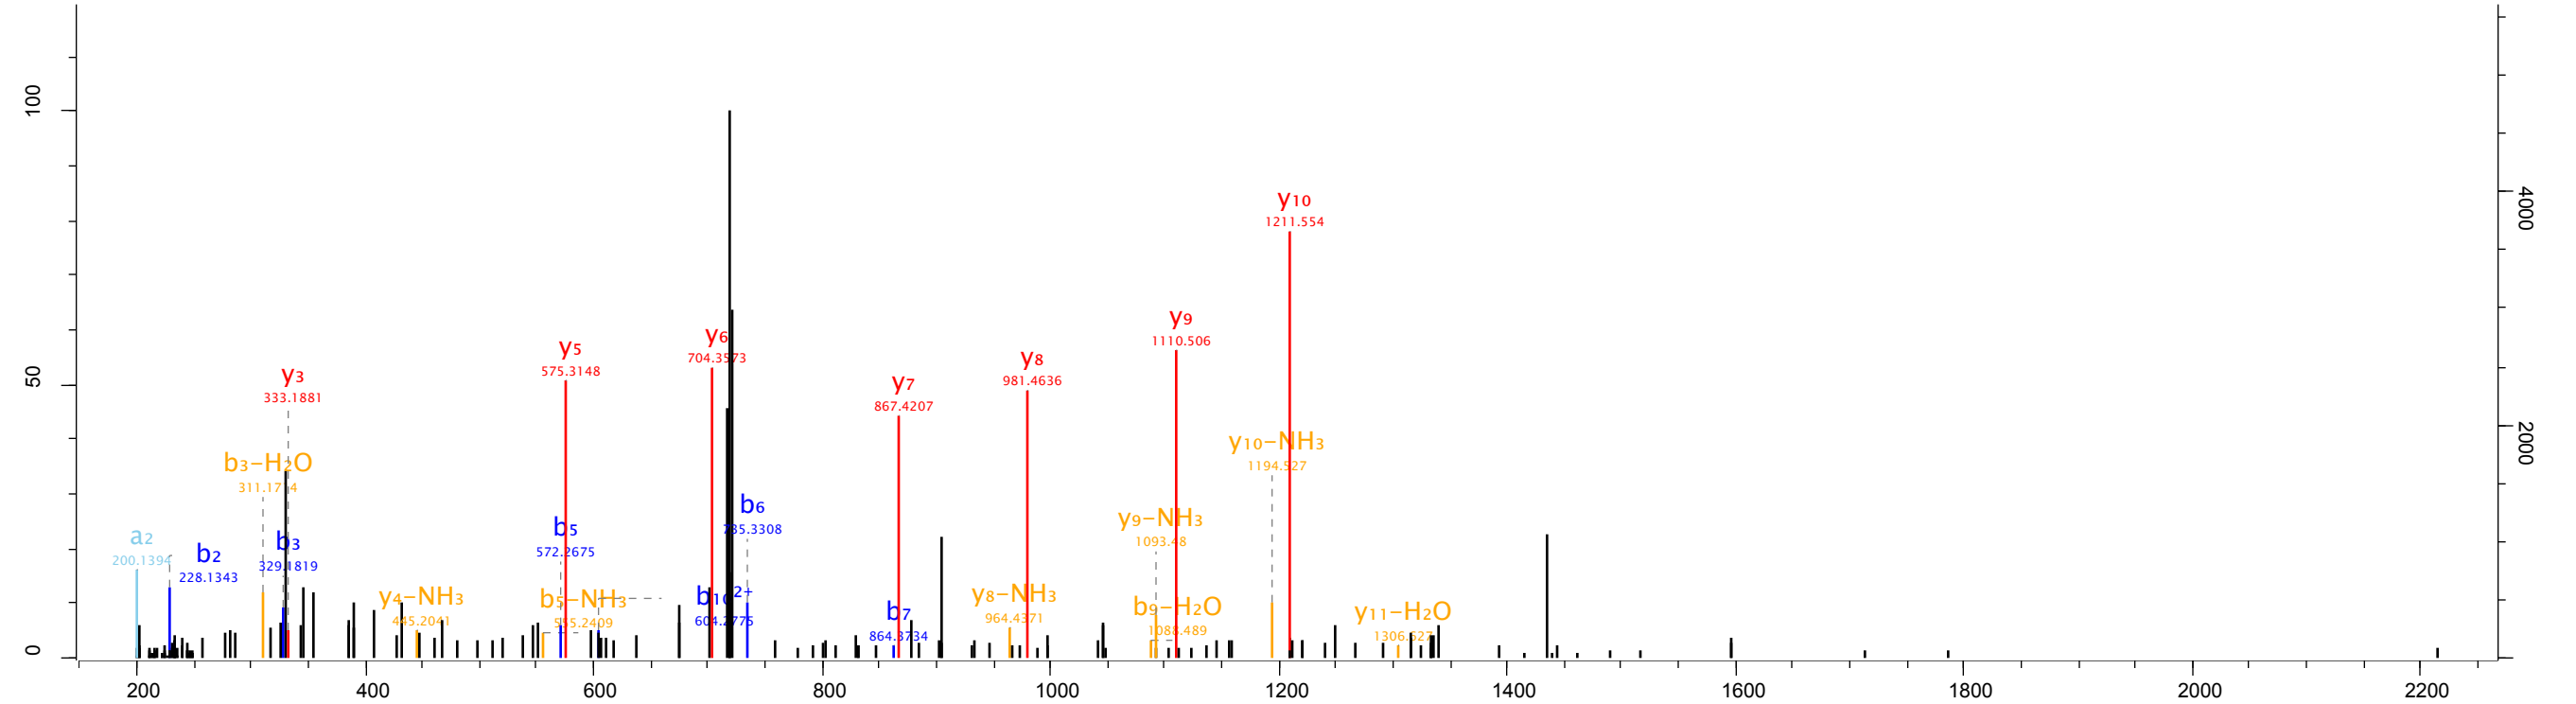

Raw file  
UPS1+500ngY\_90minTop17\_BC4\_01\_358

Scan 32729 Method TOF; CID Score 55.26 Mass 1260.66 Gene names CWH43

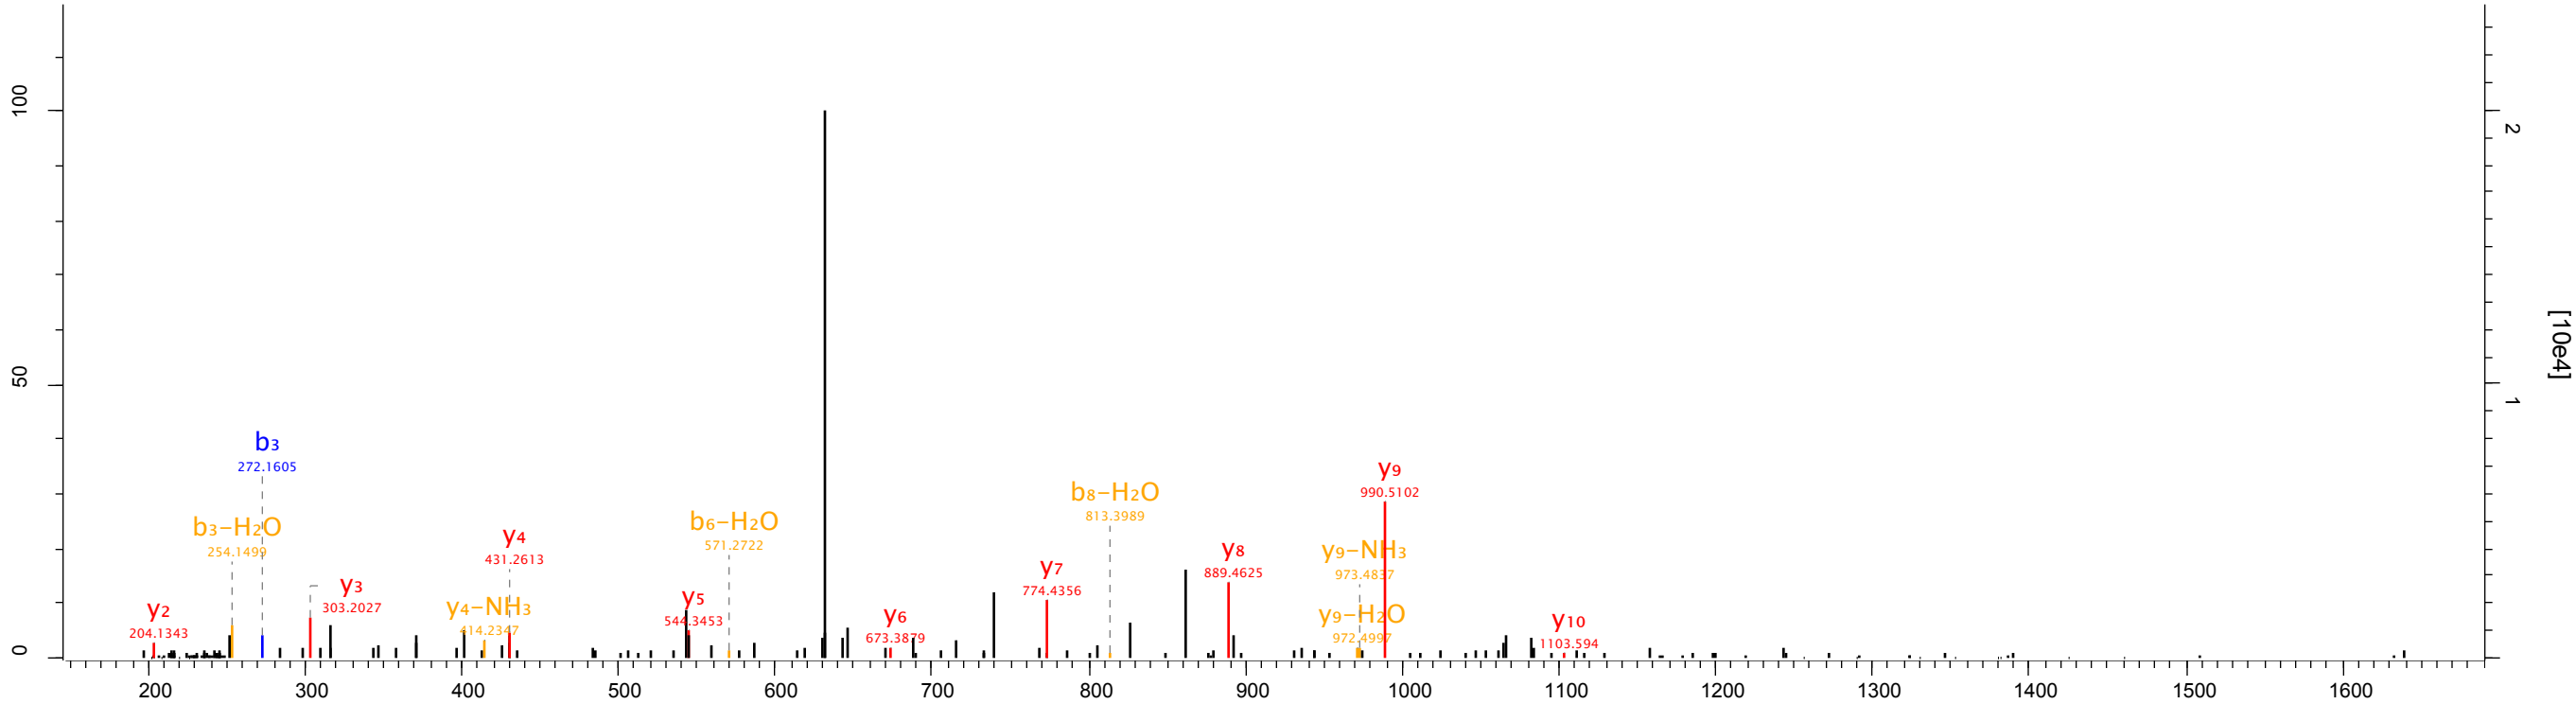

[10e4]

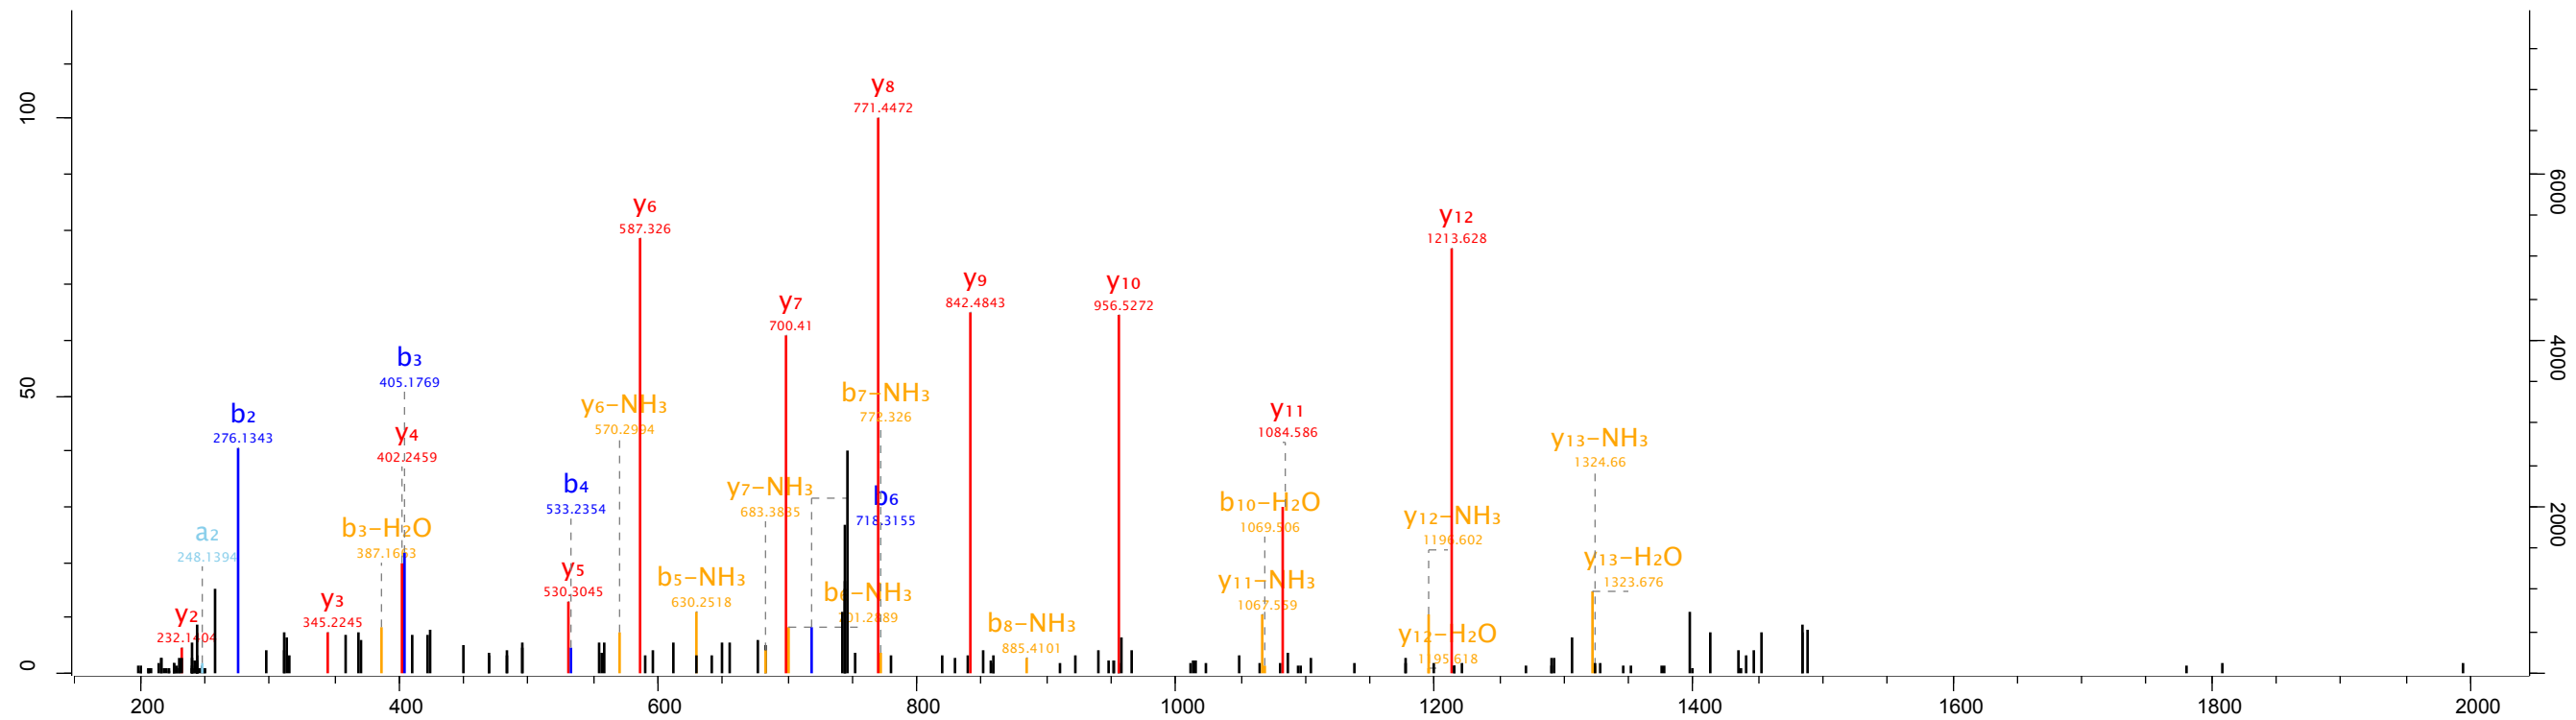

Raw file  
UPS1+500ngY\_90minTop17\_BC4\_01\_358

| Scan  | Method   | Score | Mass    | Gene names |
|-------|----------|-------|---------|------------|
| 33007 | TOF; CID | 47.71 | 1334.56 | PLB1       |

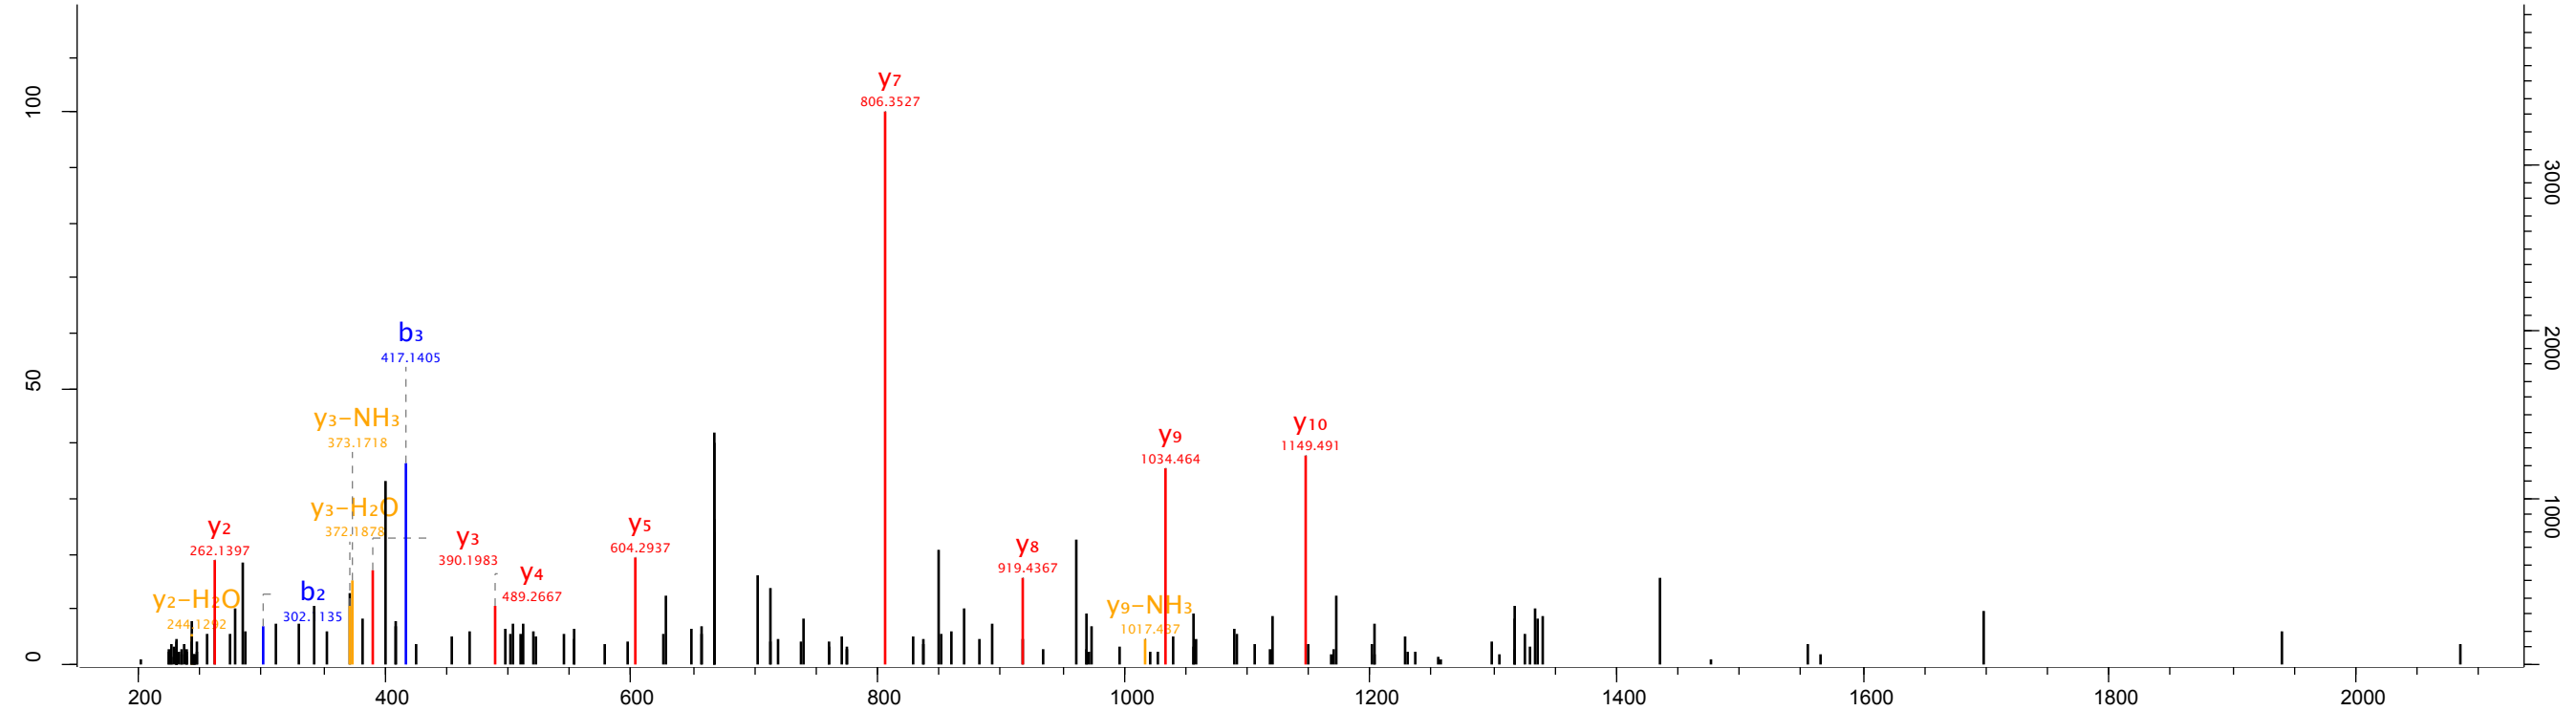

Raw file  
UPS1+500ngY\_90minTop17\_BC4\_01\_358

| Scan  | Method   | Score | Mass    | Gene names |
|-------|----------|-------|---------|------------|
| 33237 | TOF; CID | 69.28 | 1076.53 | GIM3       |

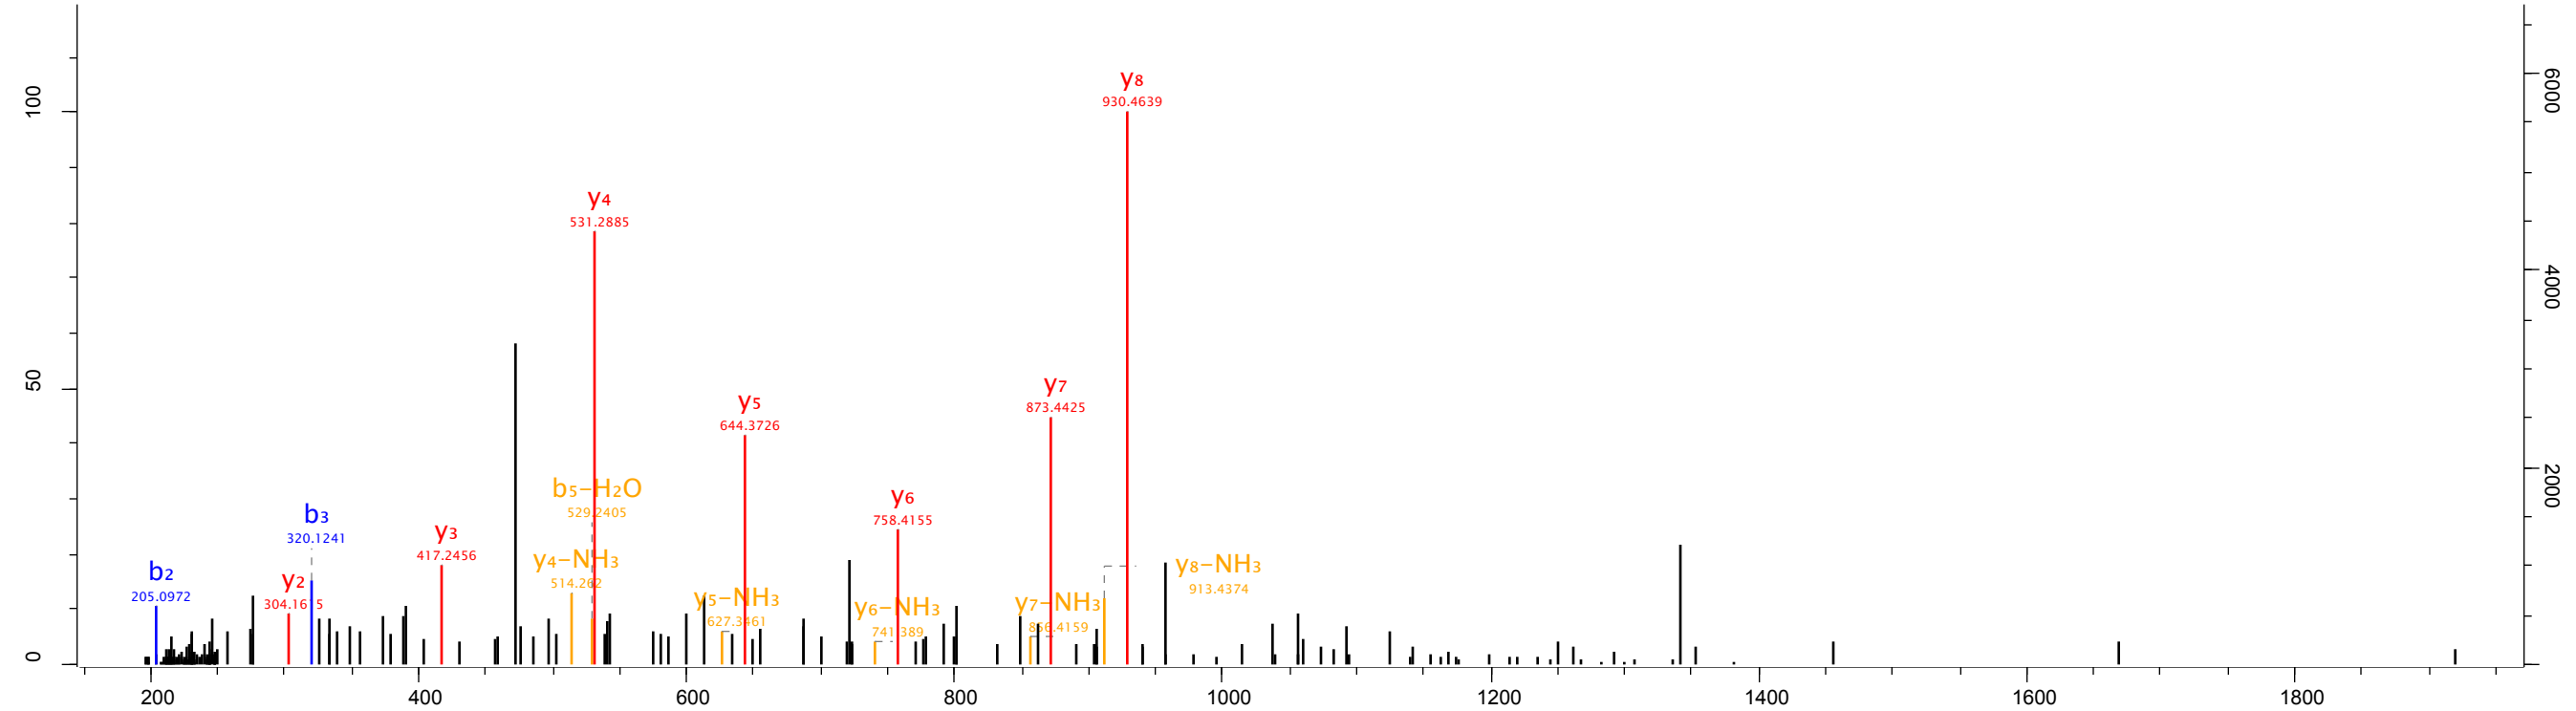

Raw file  
UPS1+500ngY\_90minTop17\_BC4\_01\_358

| Scan  | Method   | Score | Mass    | Gene names |
|-------|----------|-------|---------|------------|
| 33320 | TOF; CID | 70.06 | 1073.59 | TRX3       |

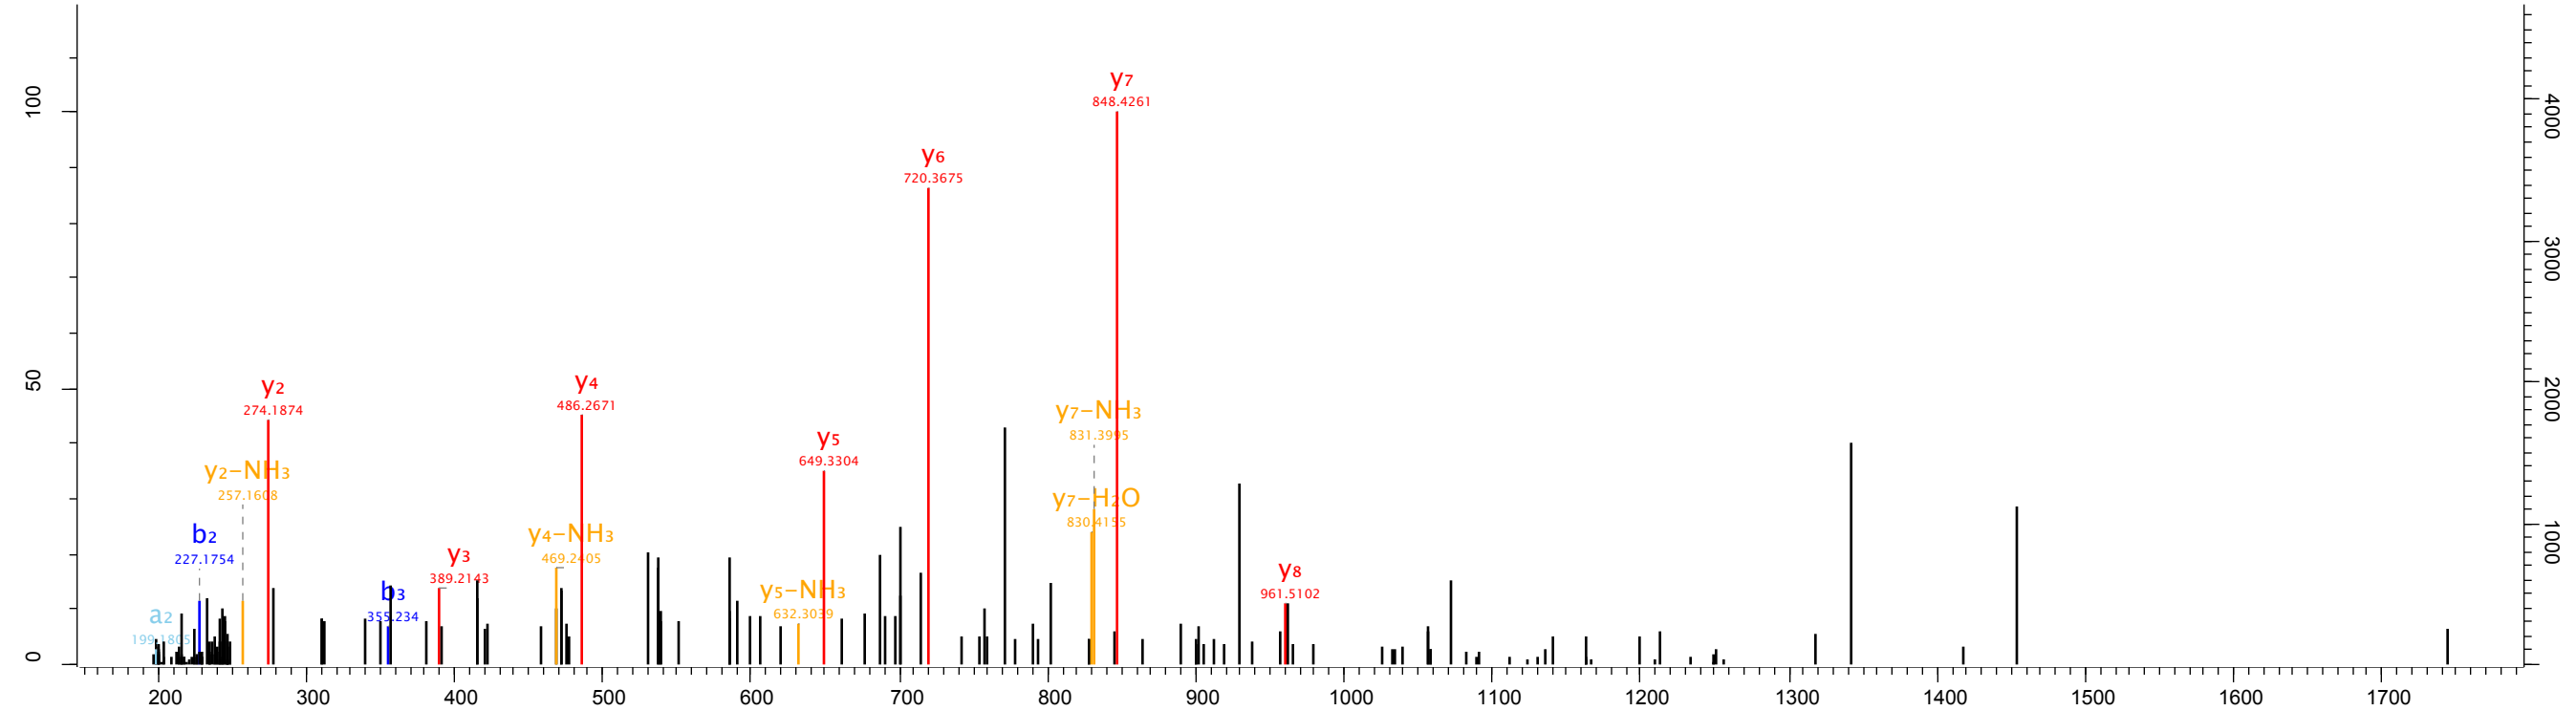

Raw file  
UPS1+500ngY\_90minTop17\_BC4\_01\_358

| Scan  | Method   | Score | Mass    | Gene names |
|-------|----------|-------|---------|------------|
| 33628 | TOF; CID | 51.11 | 1028.55 | HMS2       |

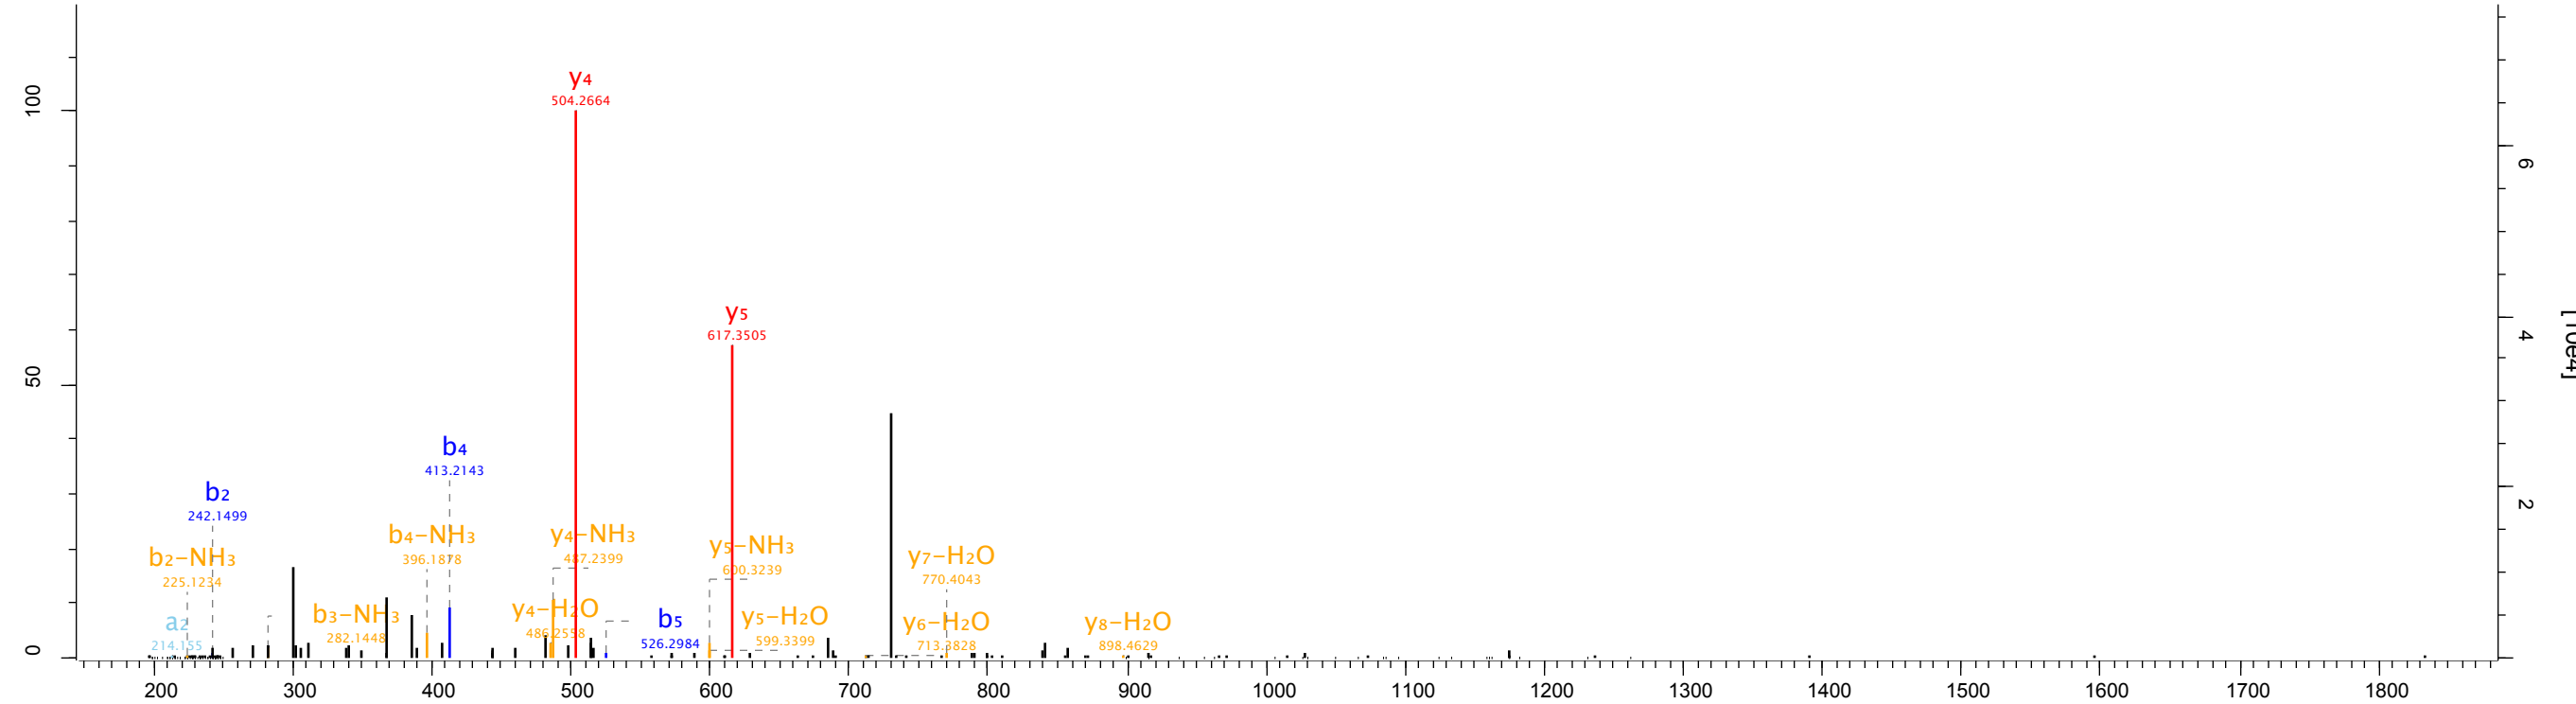

Raw file  
UPS1+500ngY\_90minTop17\_BC4\_01\_358

| Scan  | Method   | Score | Mass    | Gene names |
|-------|----------|-------|---------|------------|
| 33683 | TOF; CID | 64.83 | 1407.62 | NOP16      |

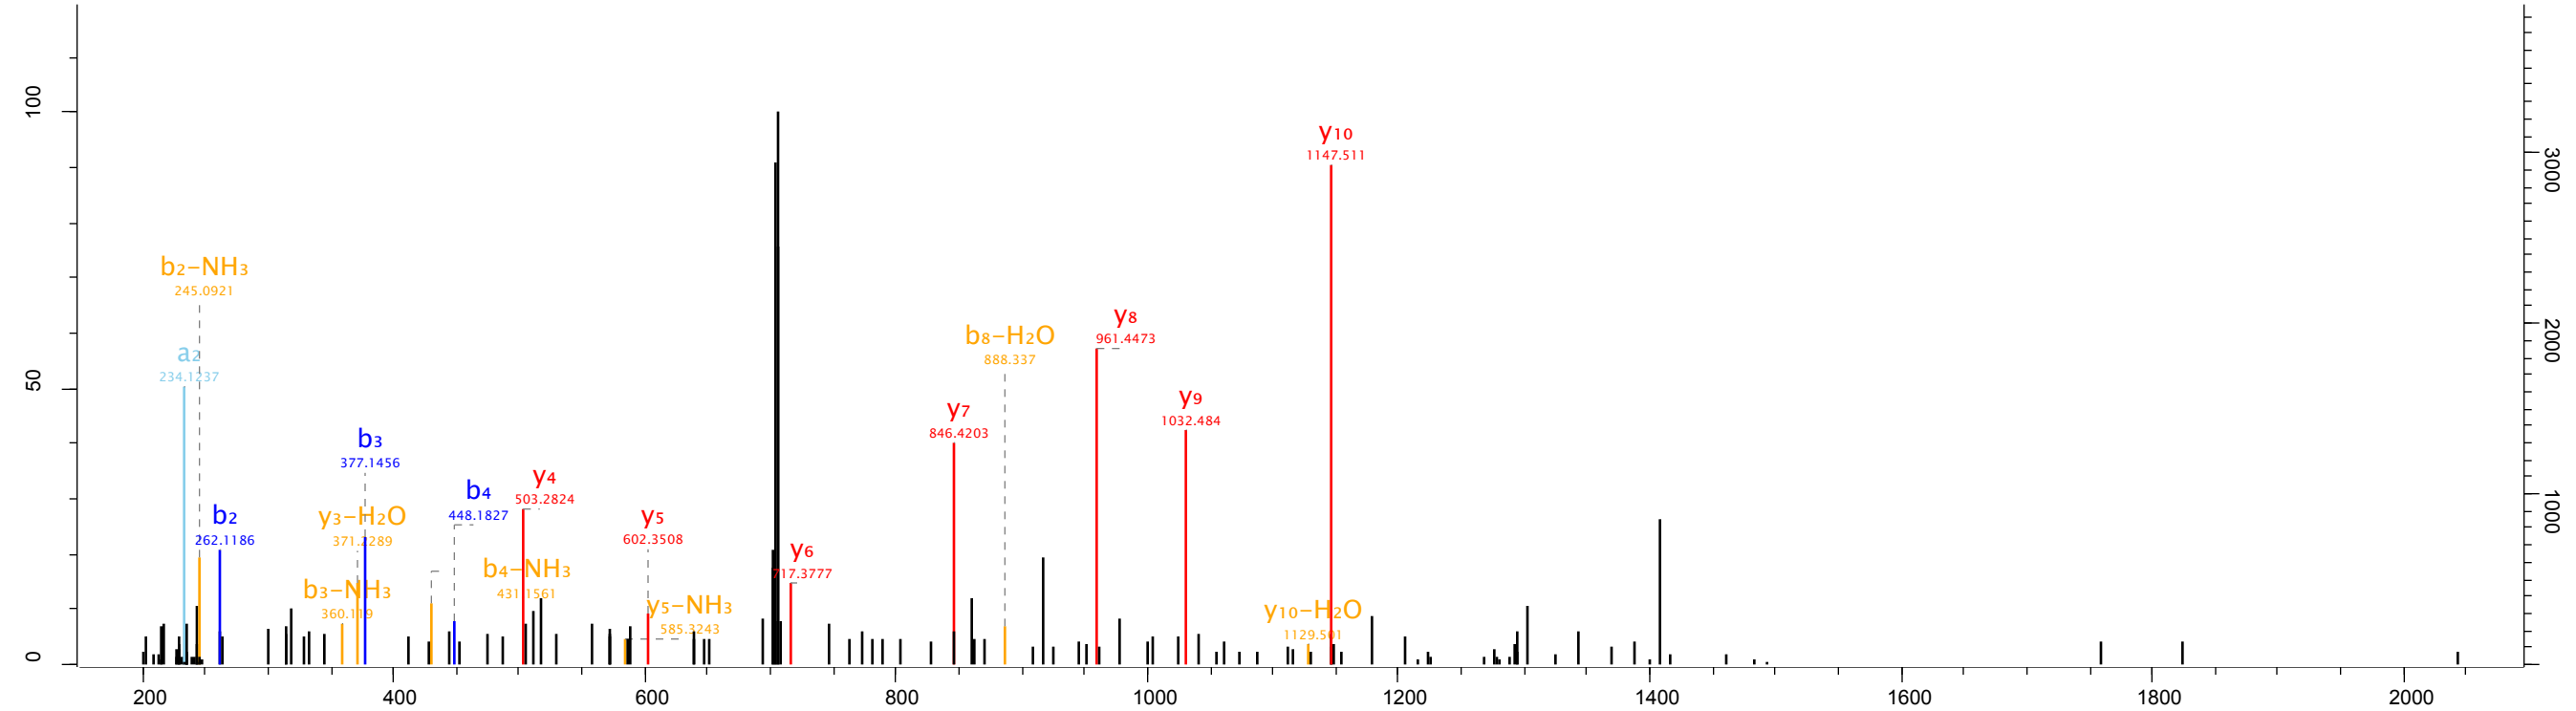



Raw file

UPS1+500ngY\_90minTop17\_BC4\_01\_358

Scan

33697

Method

TOF; CID

Score

71.18

Mass

1343.72

Gene names

TIP41

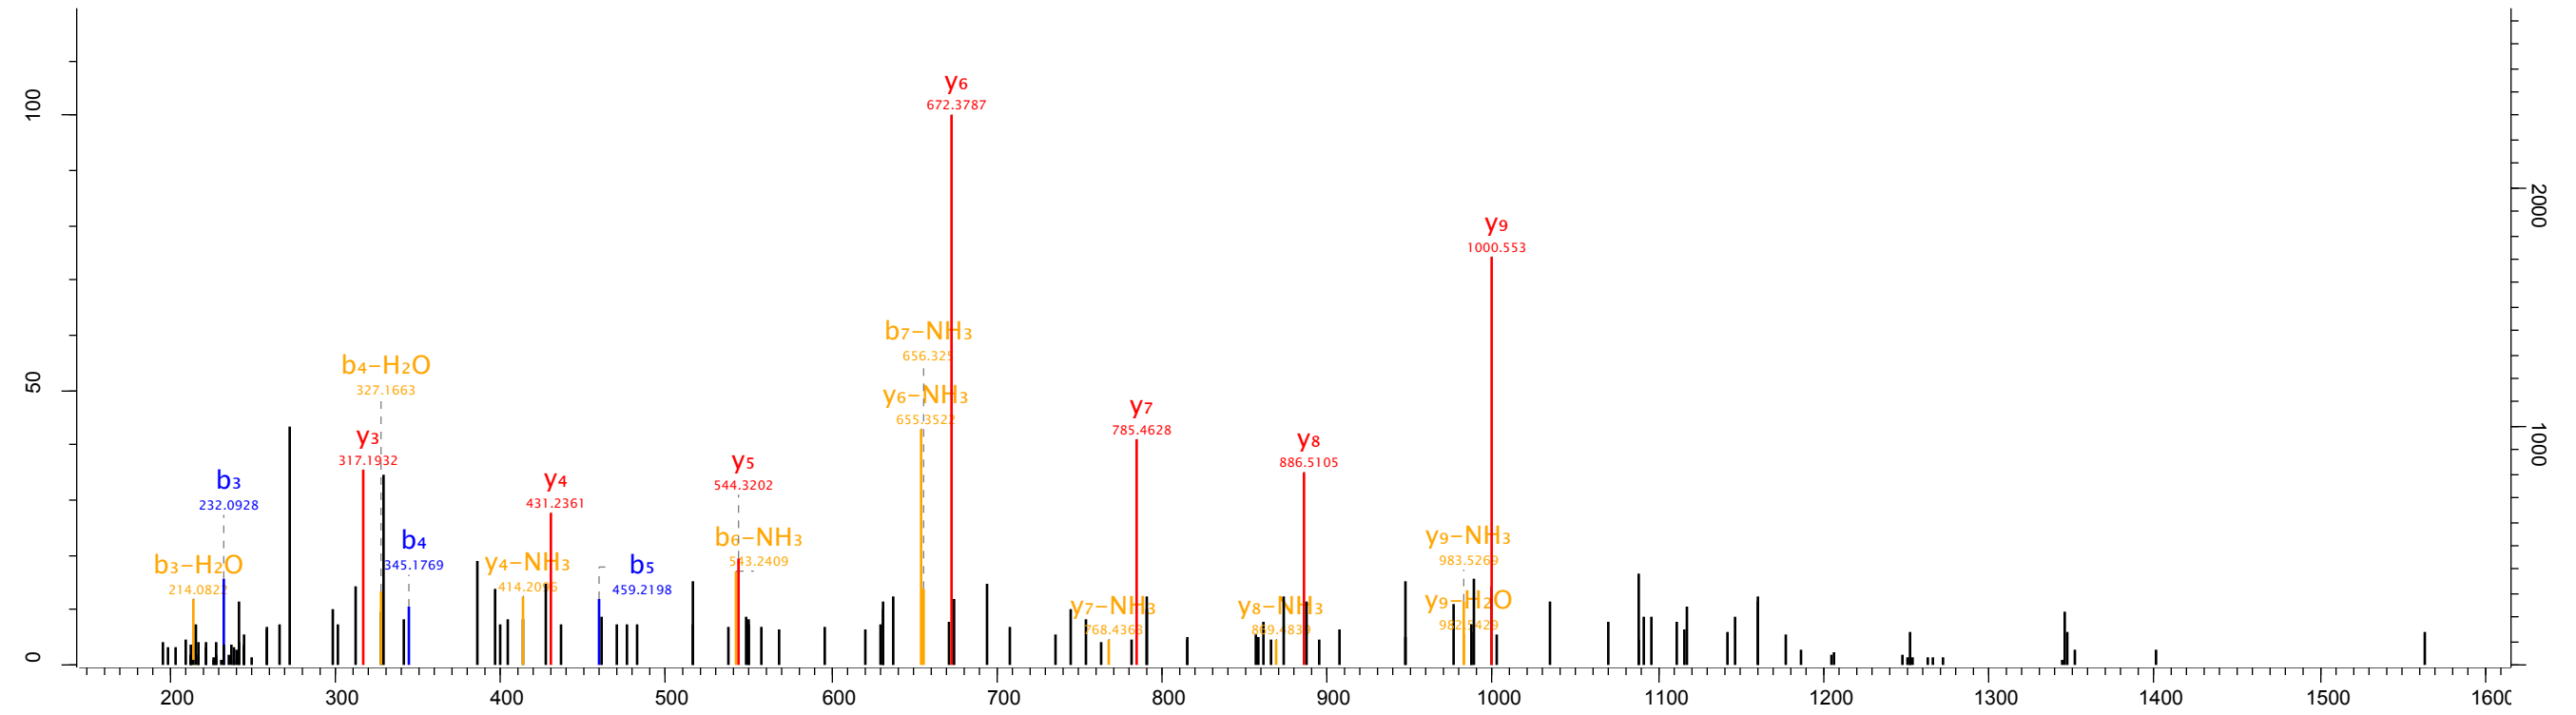

Raw file

UPS1+500ngY\_90minTop17\_BC4\_01\_358

Scan  
33741Method  
TOF; CIDScore  
57.53Mass  
1691.7Gene names  
RPD3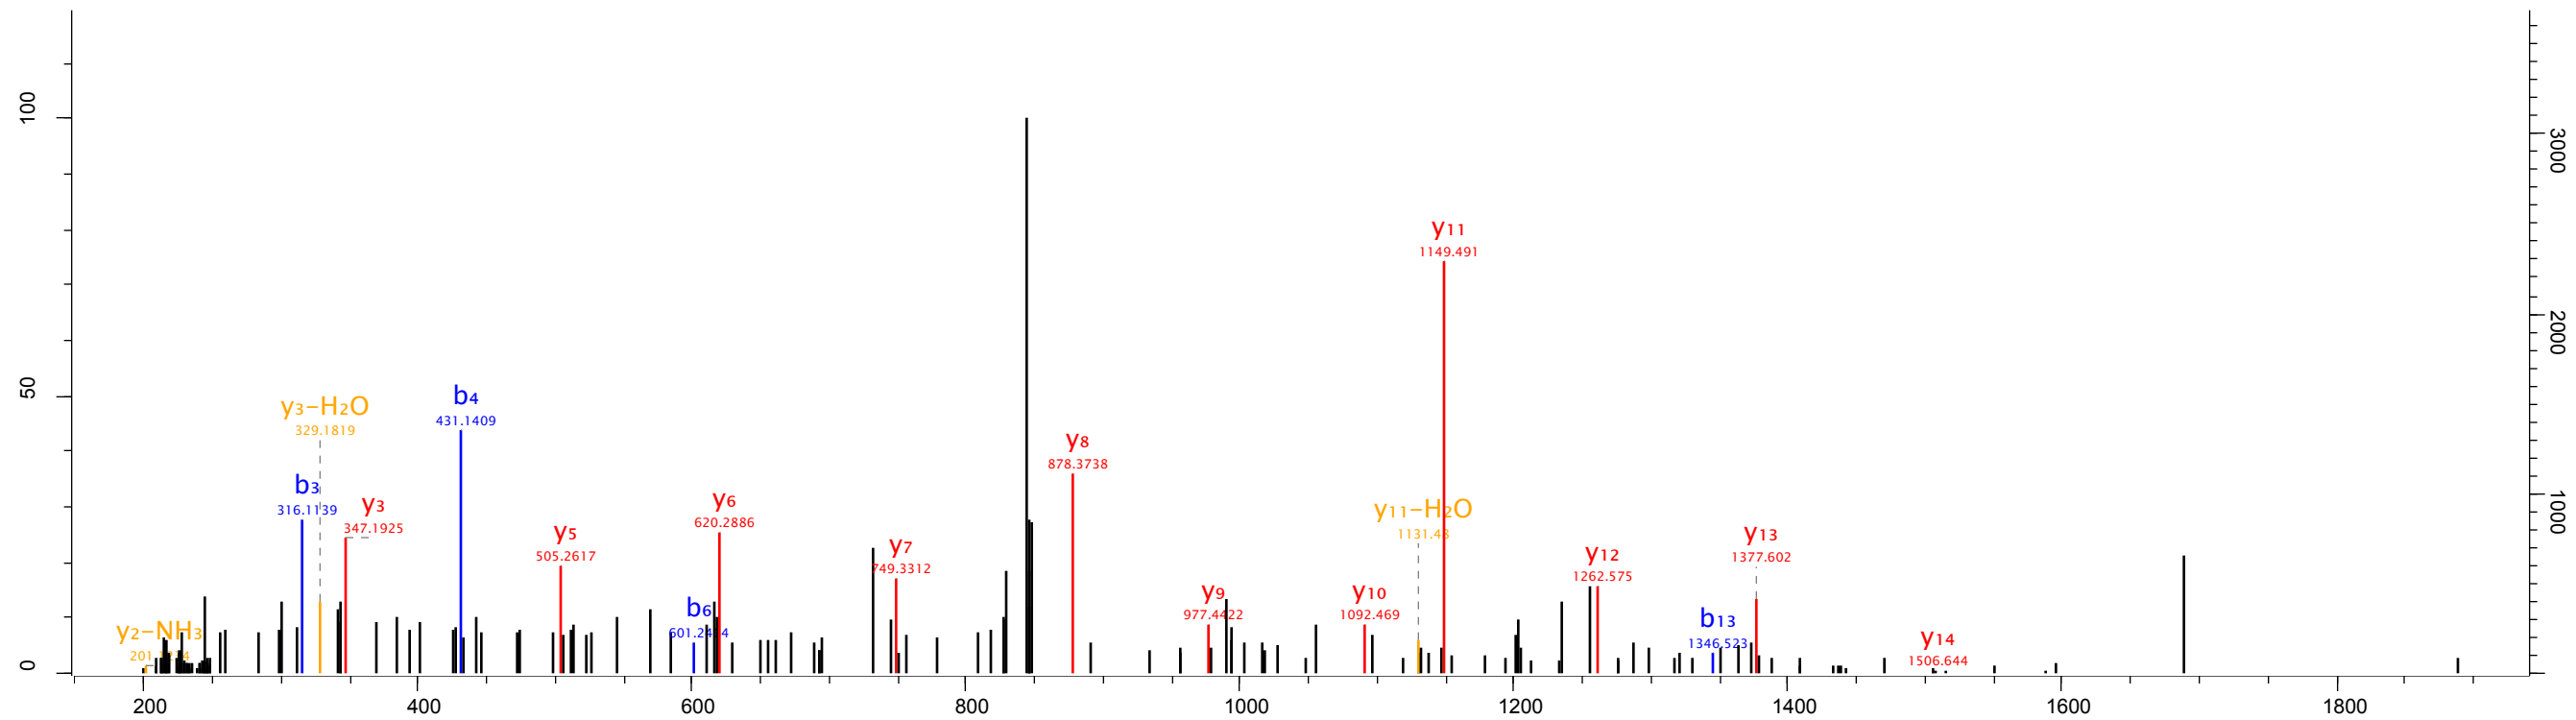

Raw file  
UPS1+500ngY\_90minTop17\_BC4\_01\_358

| Scan  | Method   | Score | Mass    | Gene names |
|-------|----------|-------|---------|------------|
| 33767 | TOF; CID | 58.36 | 2642.21 | VPS60      |

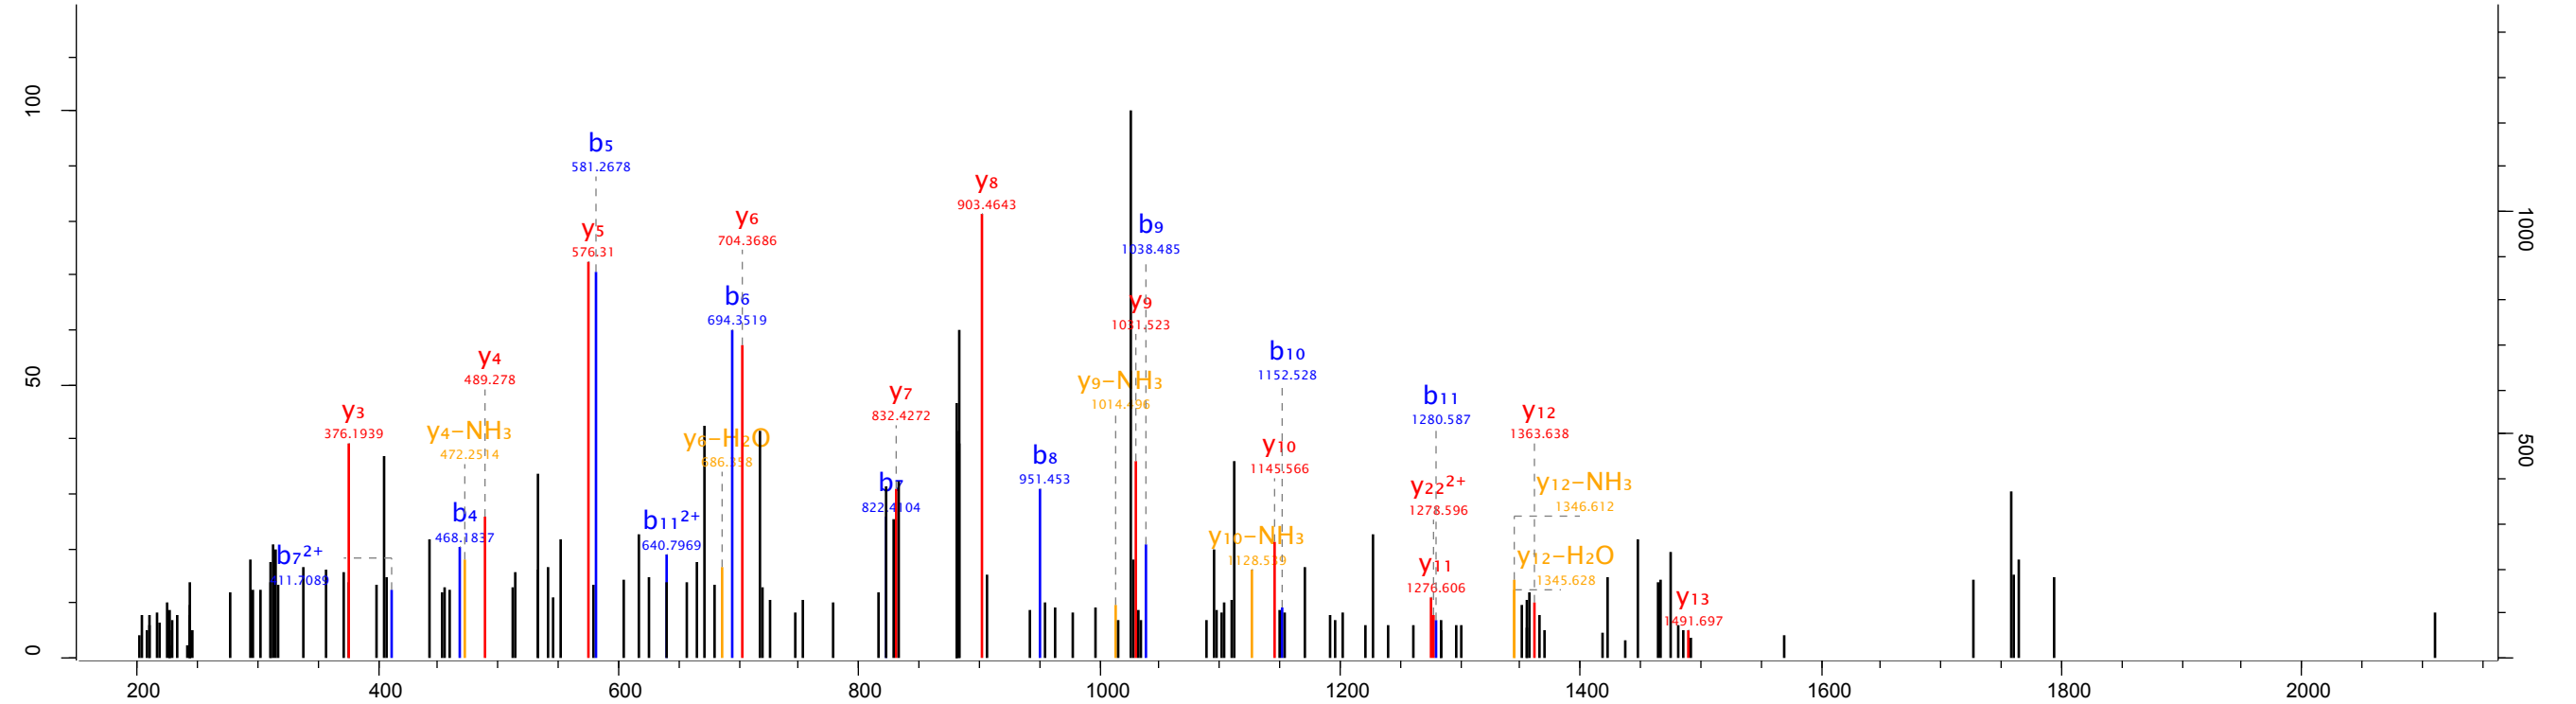

Raw file  
UPS1+500ngY\_90minTop17\_BC4\_01\_358

| Scan  | Method   | Score | Mass    | Gene names |
|-------|----------|-------|---------|------------|
| 34096 | TOF; CID | 93.14 | 1024.49 | OM14       |

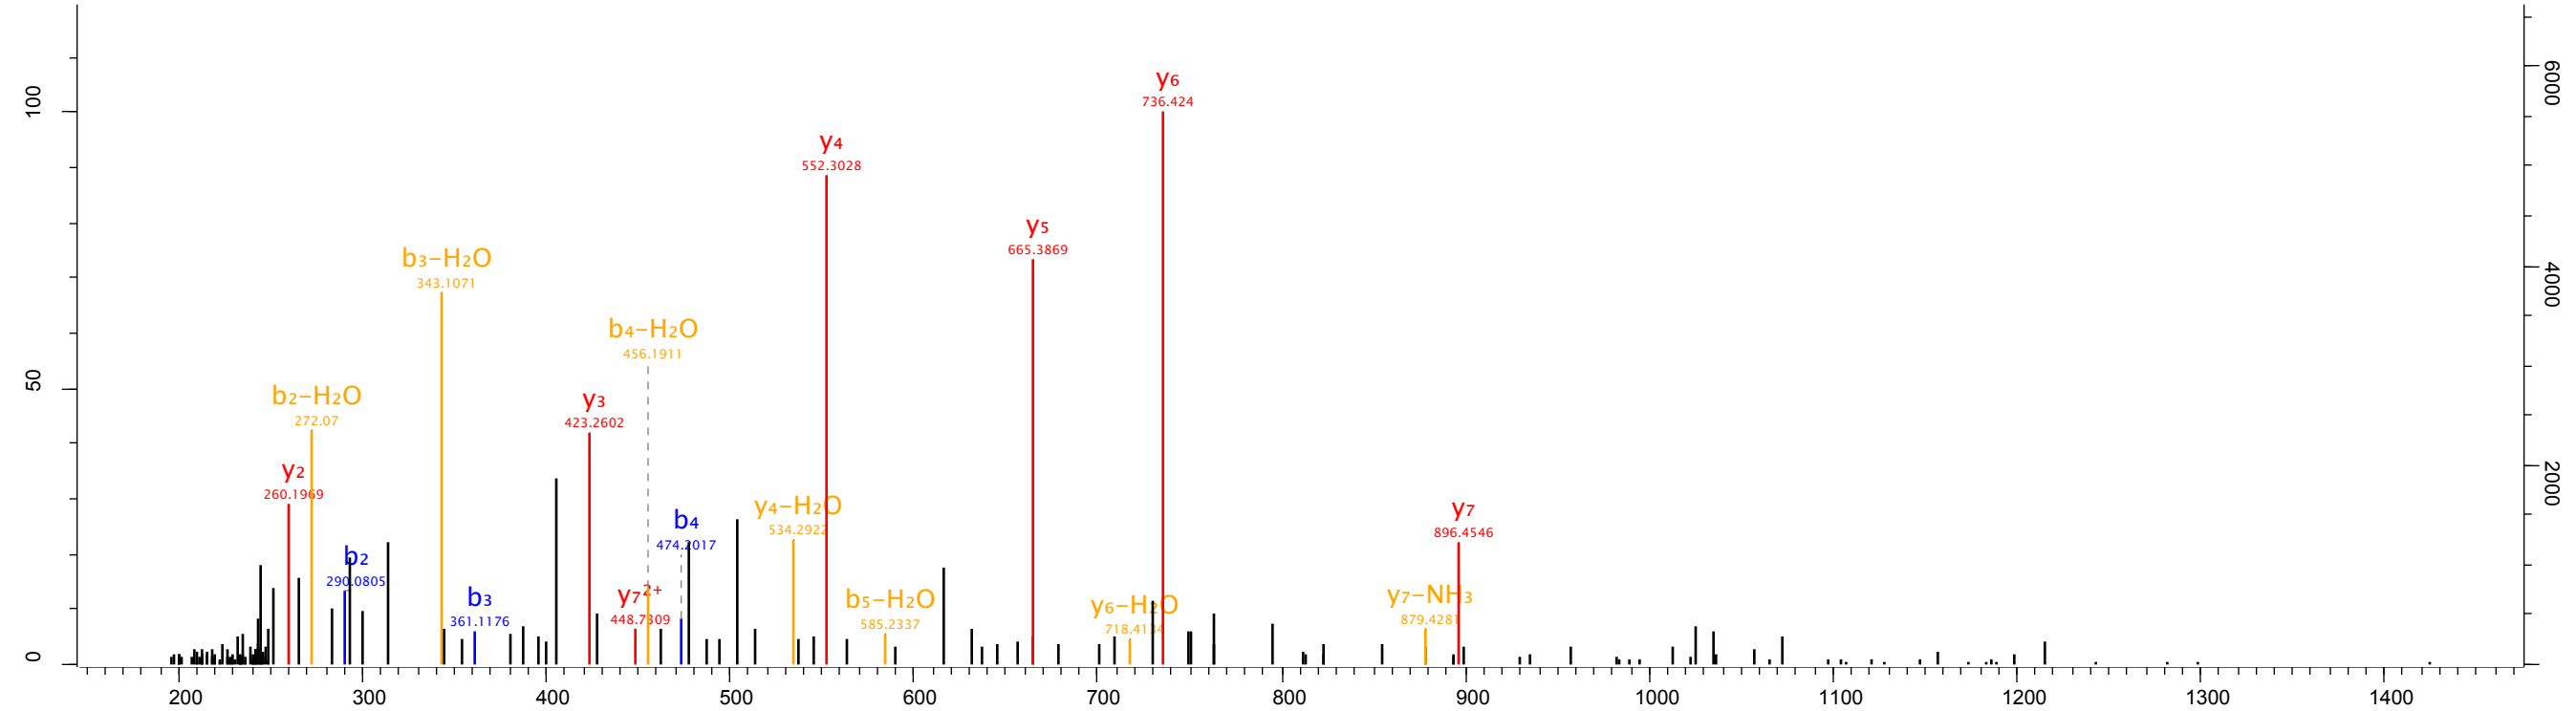

Raw file

UPS1+500ngY\_90minTop17\_BC4\_01\_358

Scan

34203

Method

TOF; CID

Score

47.68

Mass

1723.86

Gene names

REB1

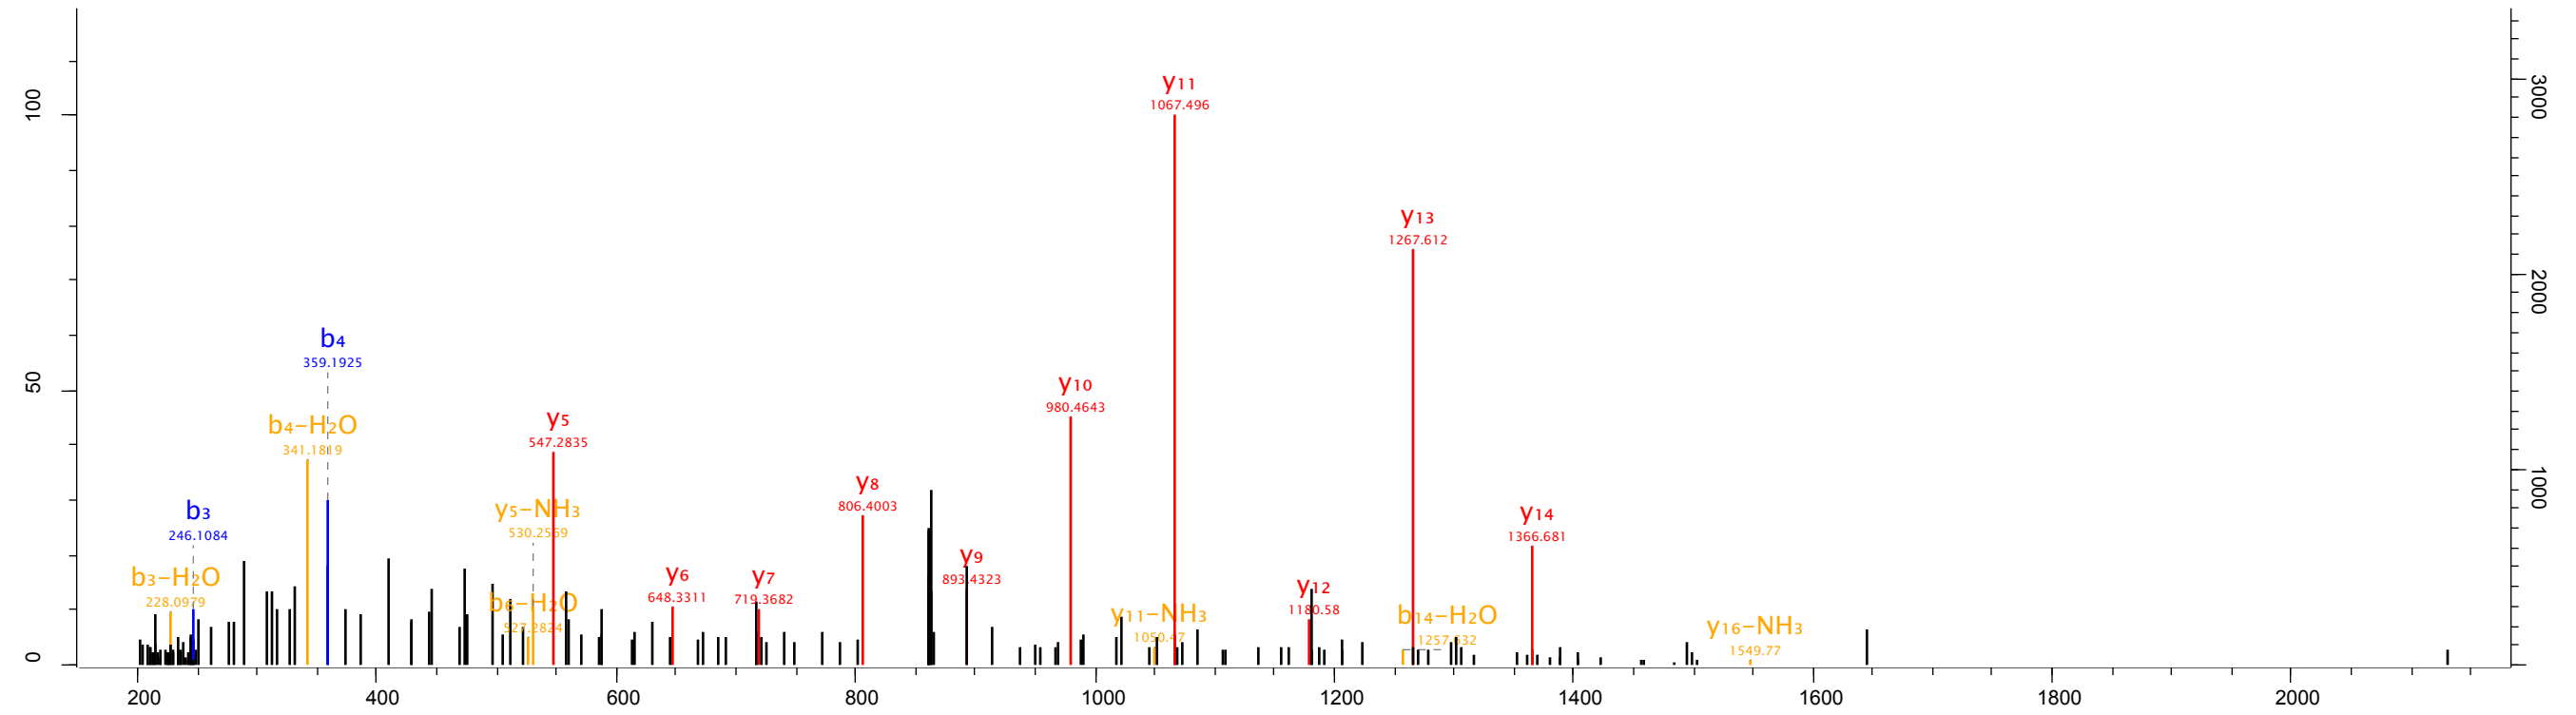

Raw file

UPS1+500ngY\_90minTop17\_BC4\_01\_358

Scan

Method

Score

Mass

Gene names

35883

TOF; CID

106.3

1711.79

CUE1

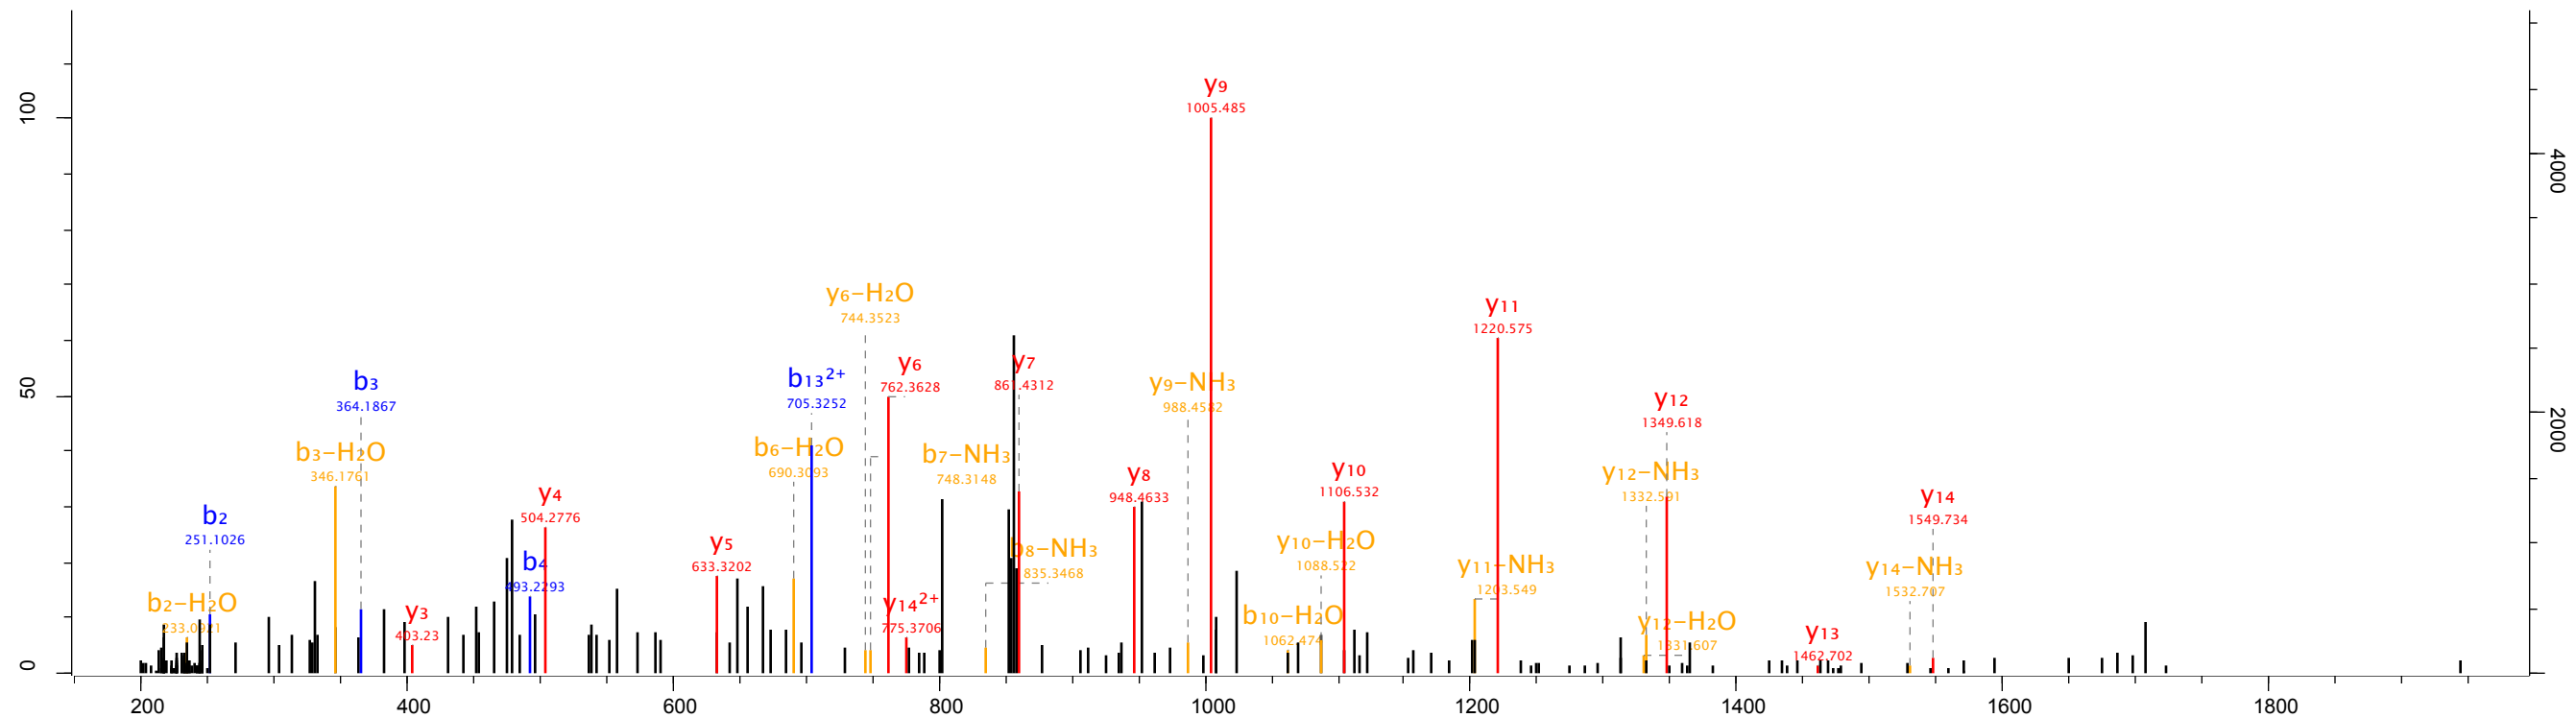

Raw file

UPS1+500ngY\_90minTop17\_BC4\_01\_358

Scan  
35930Method  
TOF; CIDScore  
56.72Mass  
1020.5Gene names  
SVP26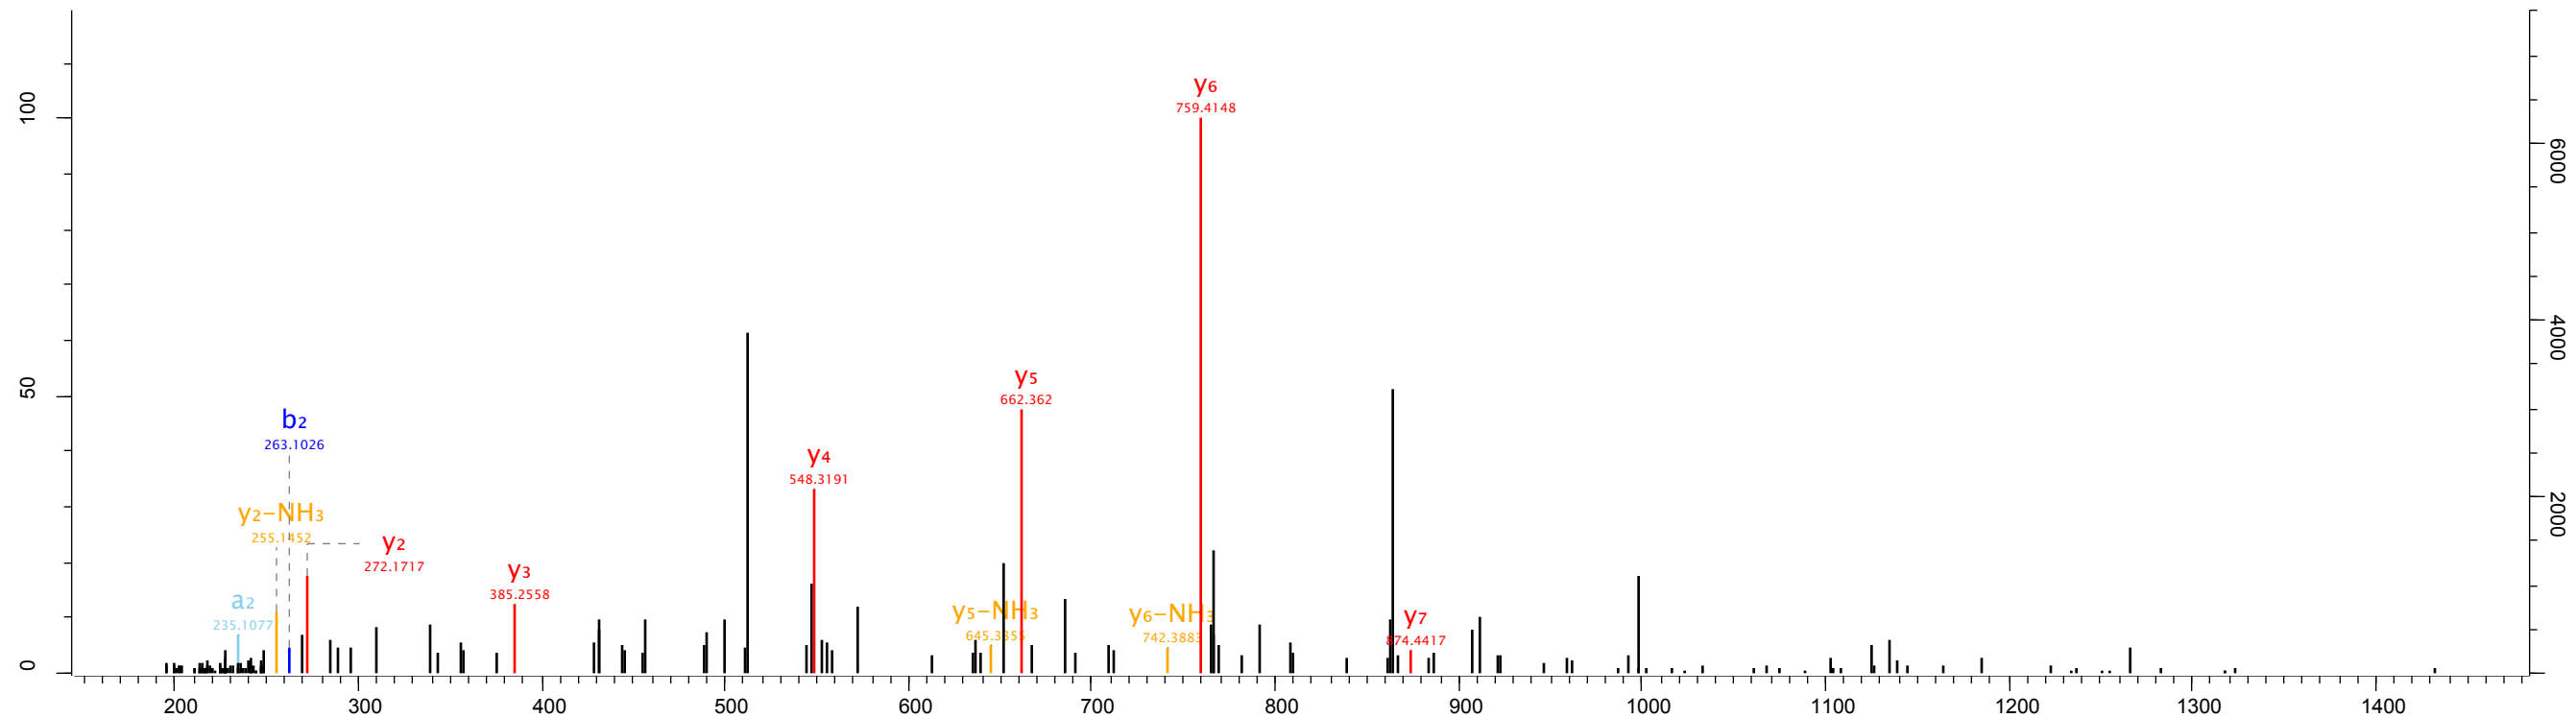

Raw file  
UPS1+500ngY\_90minTop17\_BC4\_01\_358

Scan: 36028  
Method: TOF; CID  
Score: 61.58  
Mass: 938.55

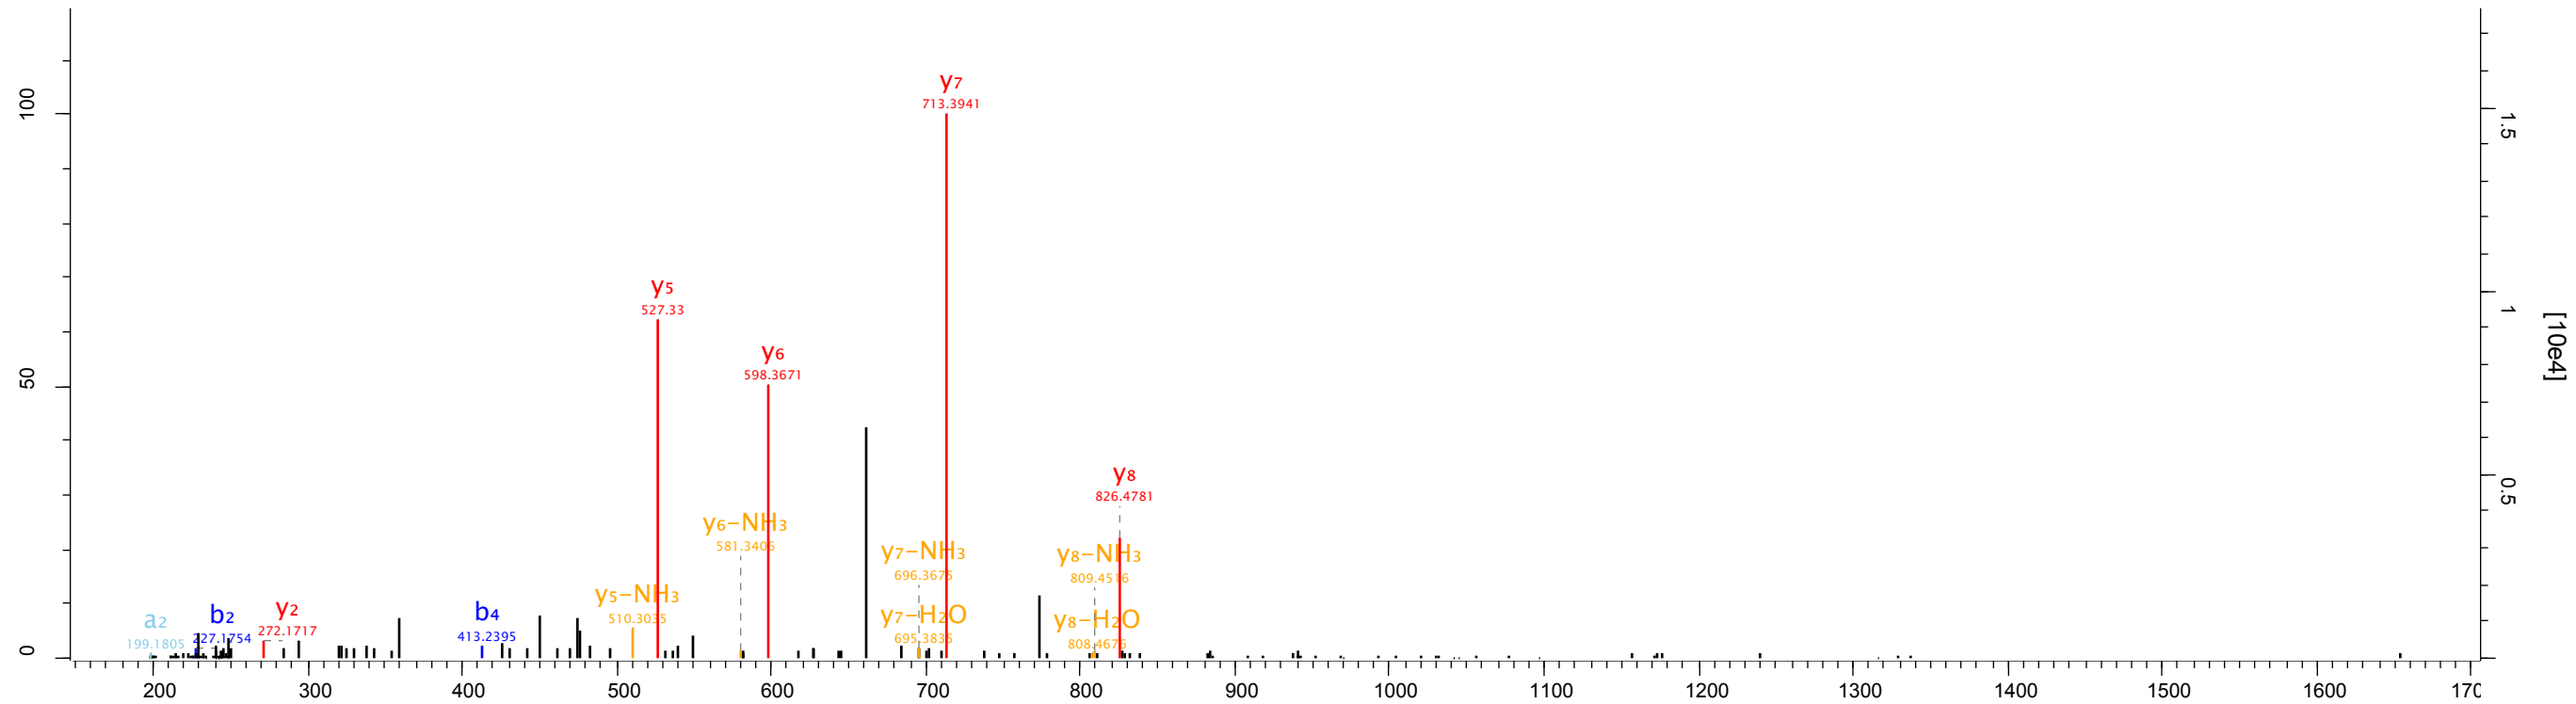



Raw file  
UPS1+500ngY\_90minTop17\_BC4\_01\_358

| Scan  | Method   | Score | Mass    | Gene names |
|-------|----------|-------|---------|------------|
| 36912 | TOF; CID | 42.95 | 1744.77 | NAB2       |

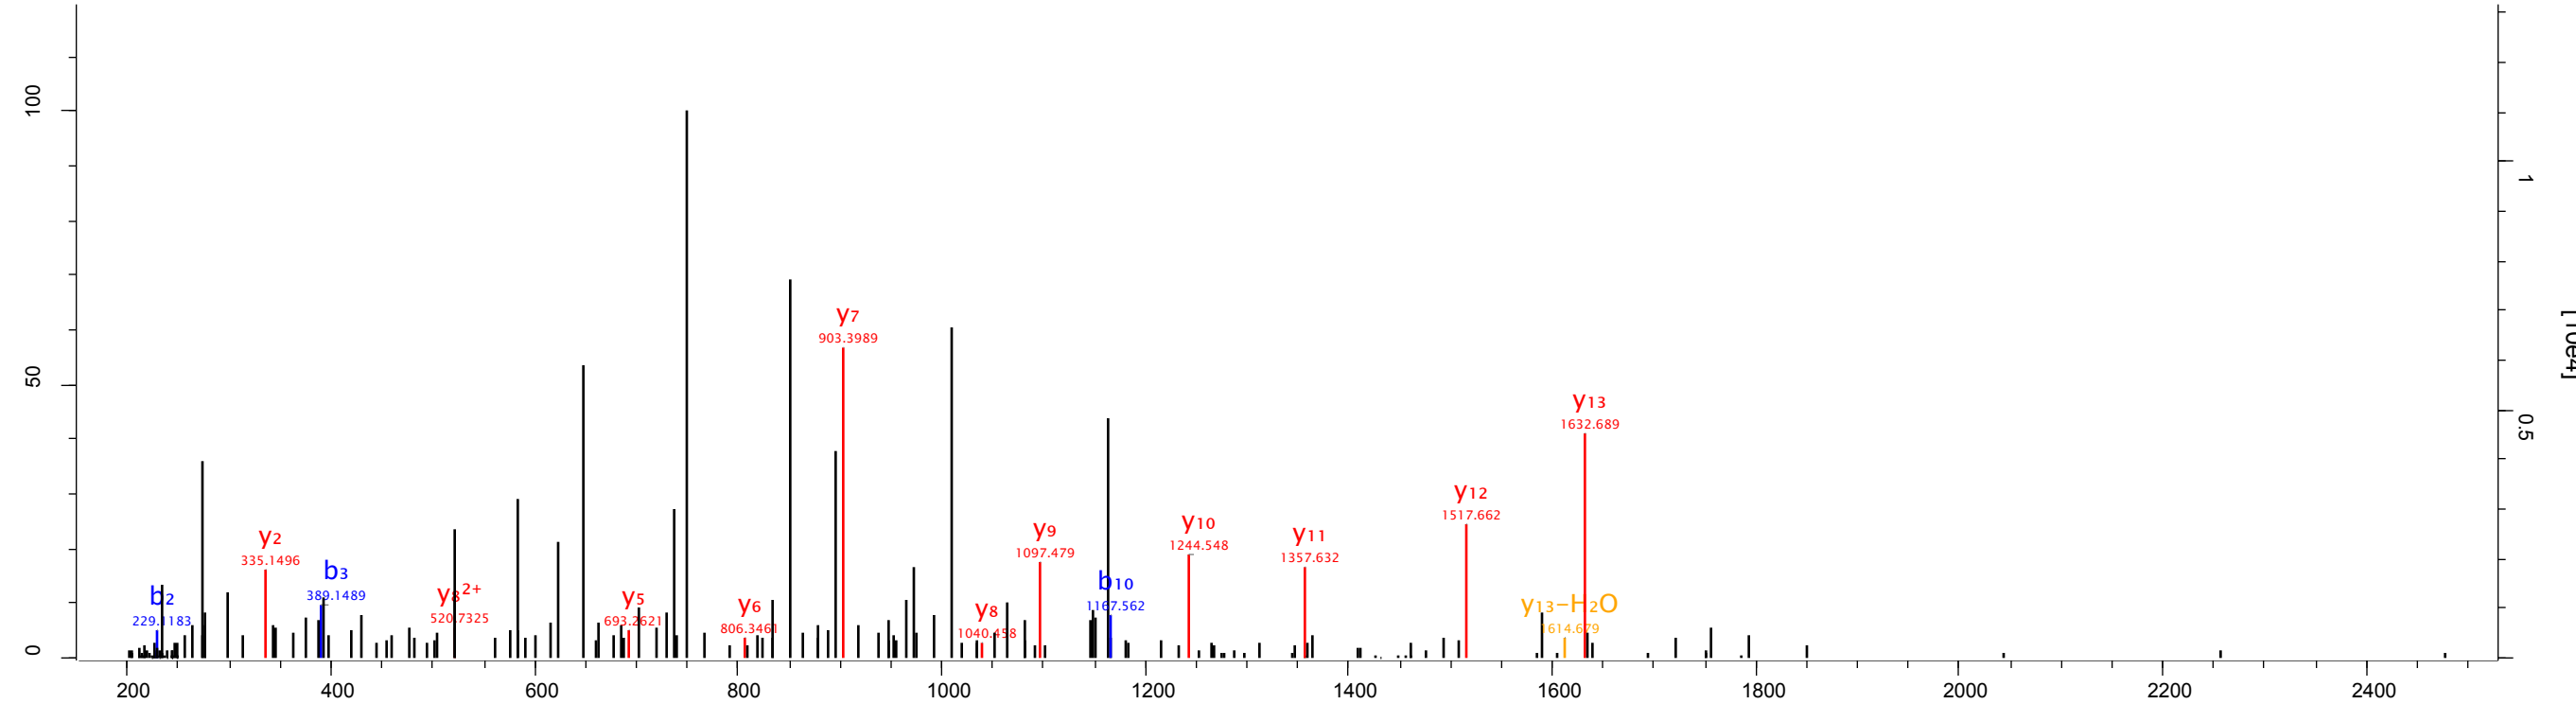

Raw file

UPS1+500ngY\_90minTop17\_BC4\_01\_358

|       |          |       |         |            |
|-------|----------|-------|---------|------------|
| Scan  | Method   | Score | Mass    | Gene names |
| 37063 | TOF; CID | 49.47 | 1131.58 | NCB2       |

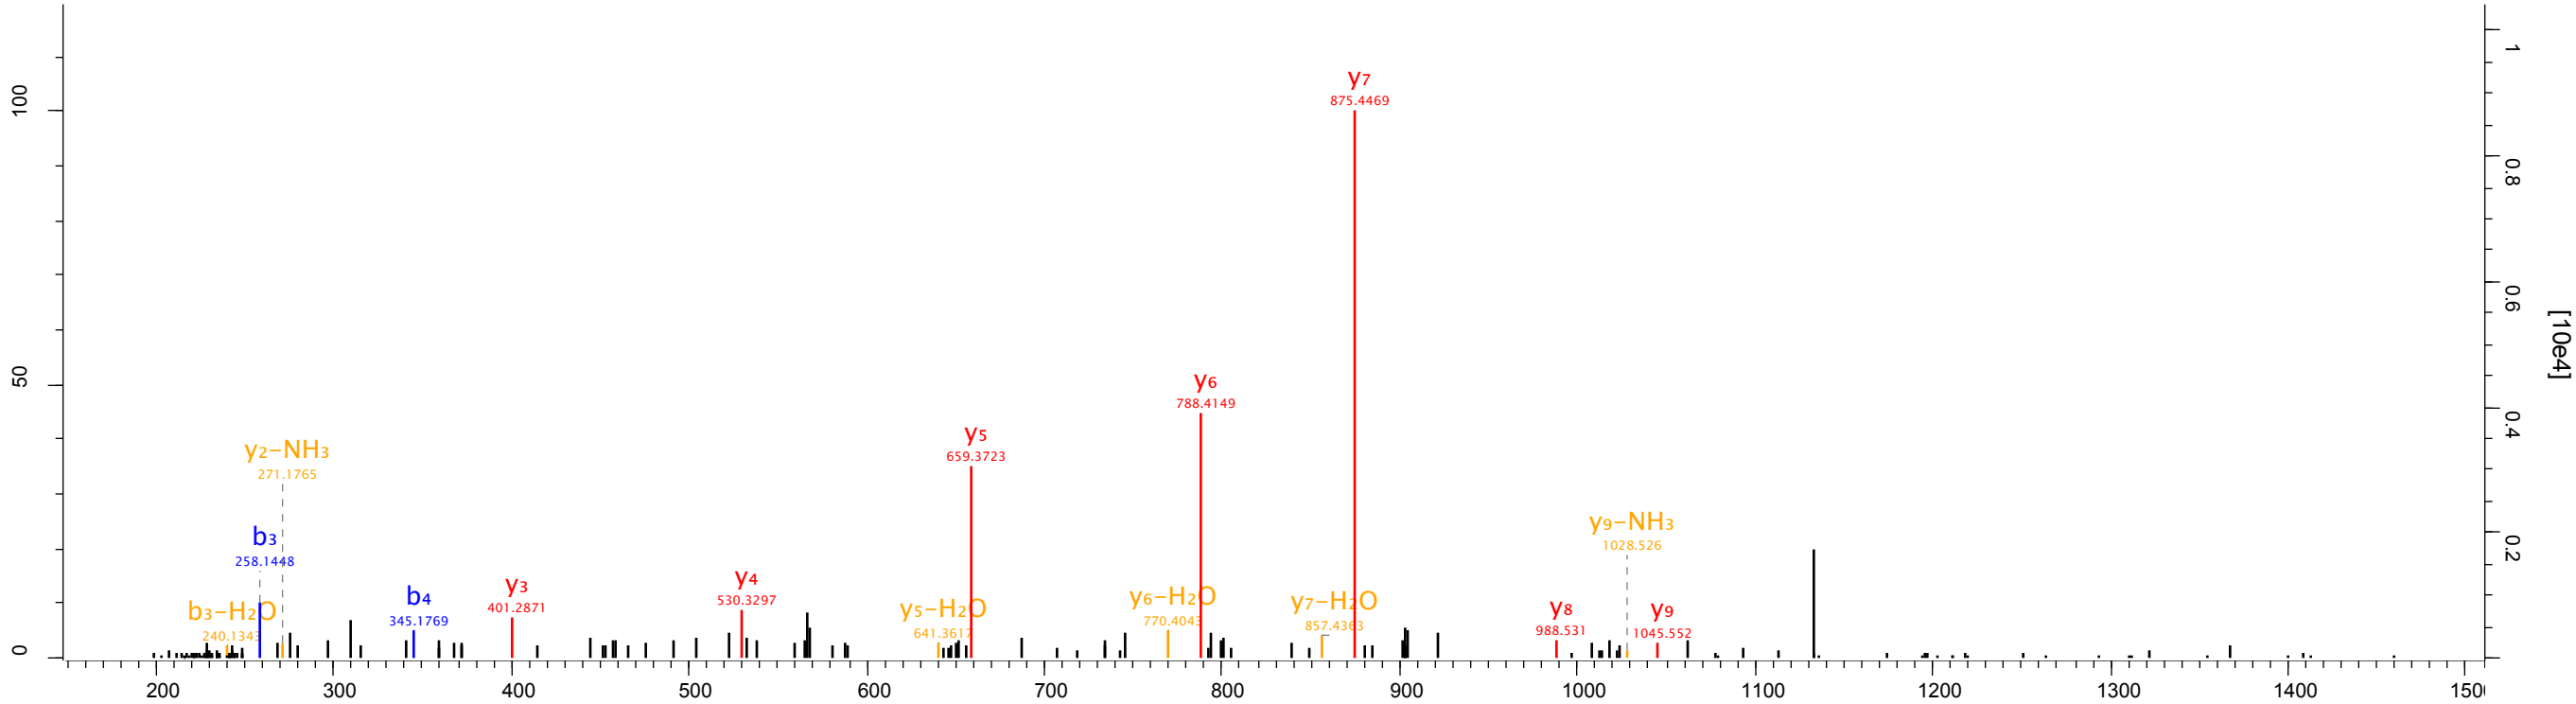

Raw file

UPS1+500ngY\_90minTop17\_BC4\_01\_358

Scan

37420

Method

TOF; CID

Score

54.81

Mass

1636.83

Gene names

RPC19

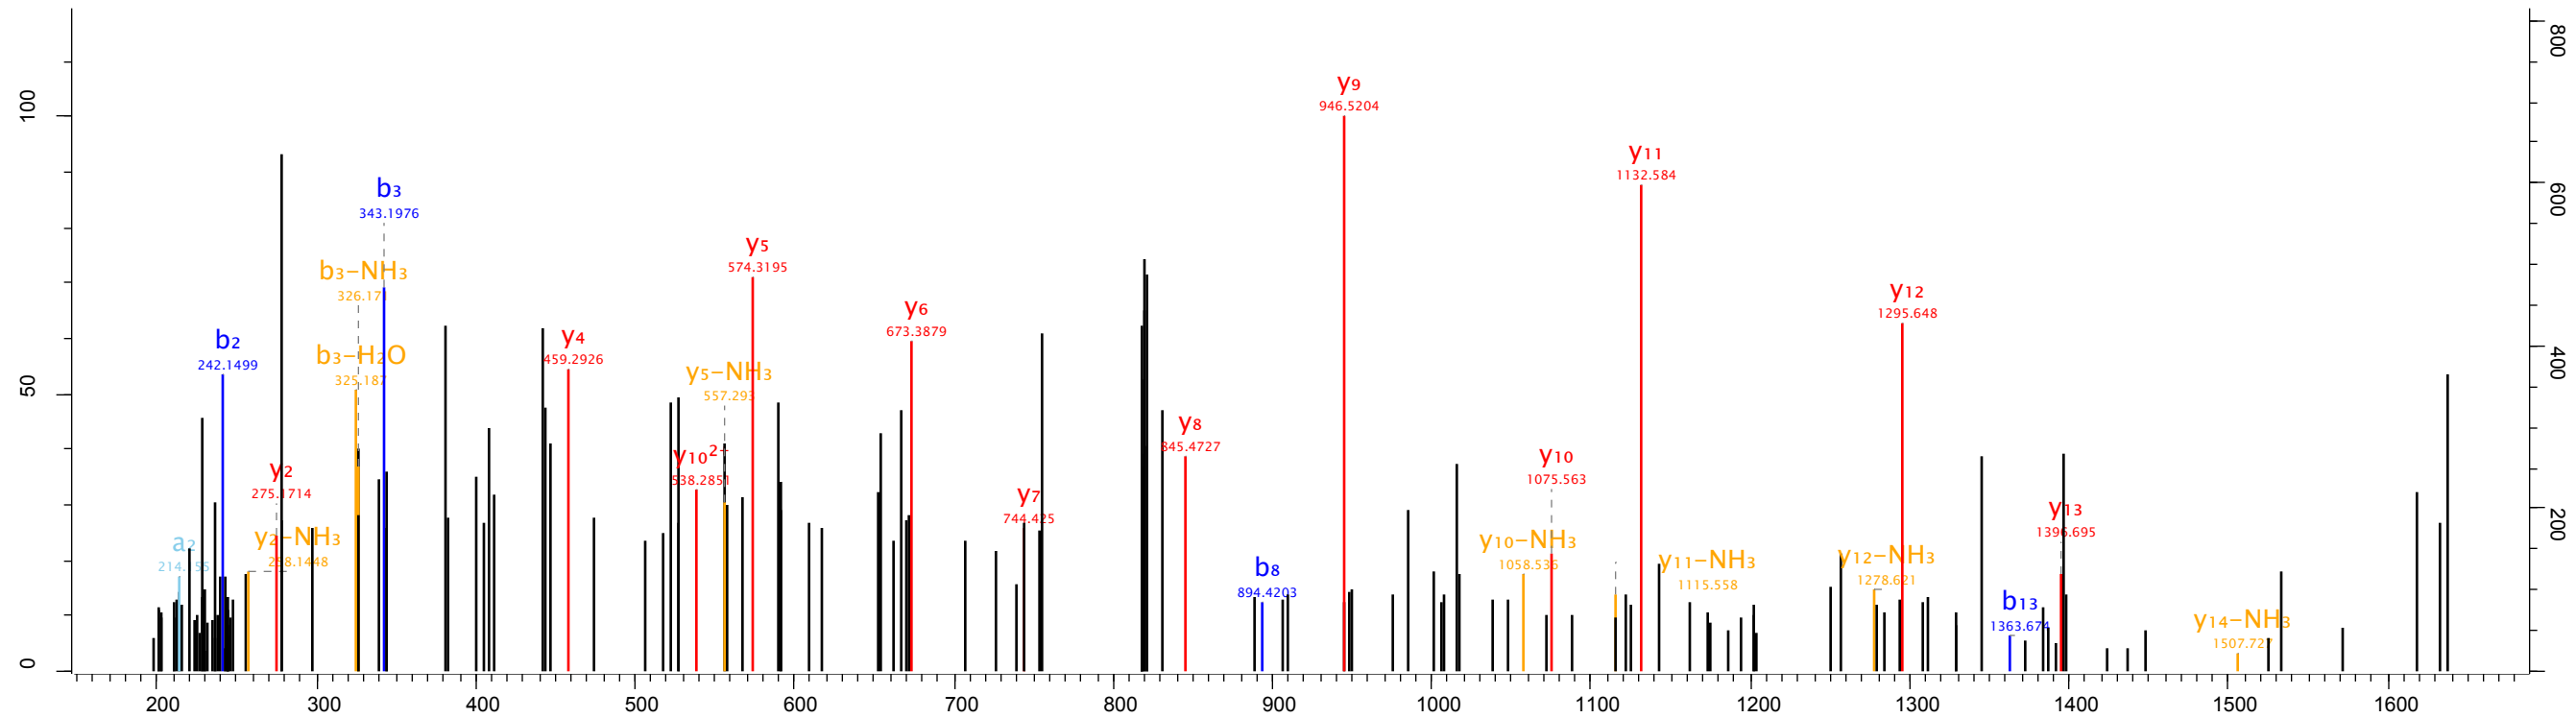

Raw file  
UPS1+500ngY\_90minTop17\_BC4\_01\_358

| Scan  | Method   | Score | Mass    | Gene names |
|-------|----------|-------|---------|------------|
| 37507 | TOF; CID | 66.74 | 2009.96 | MGR2       |

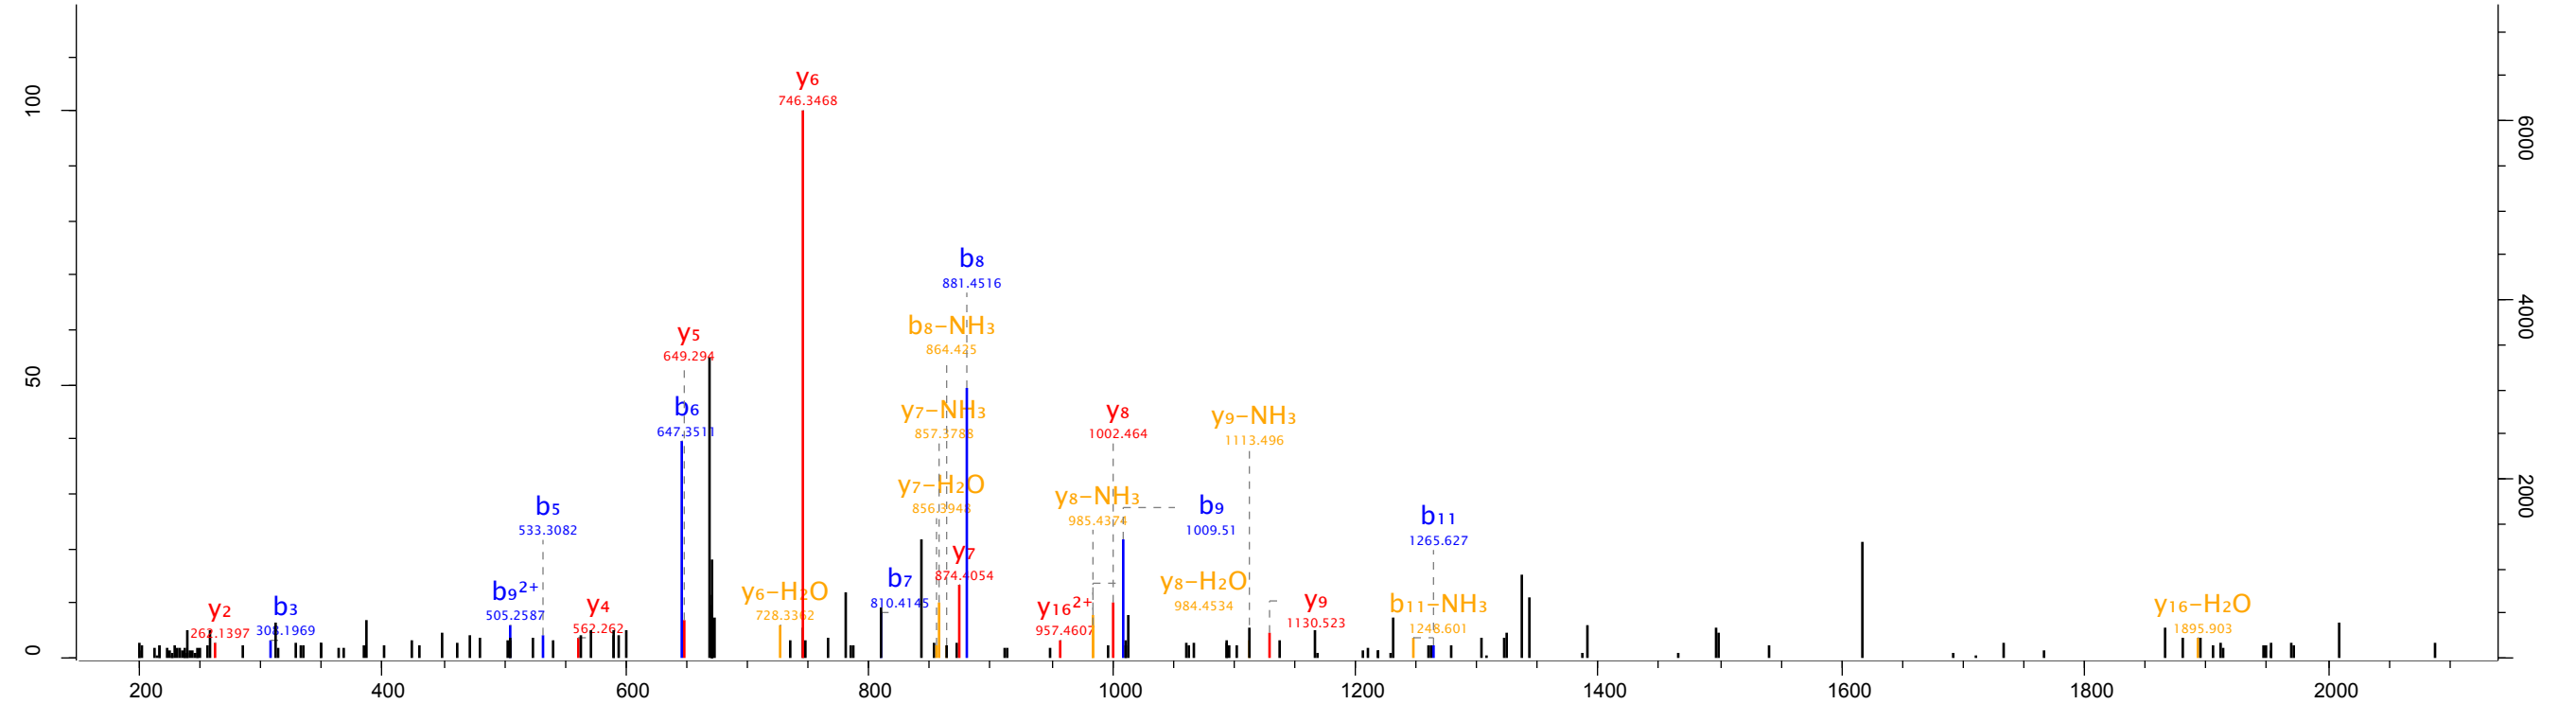

Raw file  
UPS1+500ngY\_90minTop17\_BC4\_01\_358

| Scan  | Method   | Score | Mass    | Gene names |
|-------|----------|-------|---------|------------|
| 38082 | TOF; CID | 50.48 | 1133.61 | AIM2       |

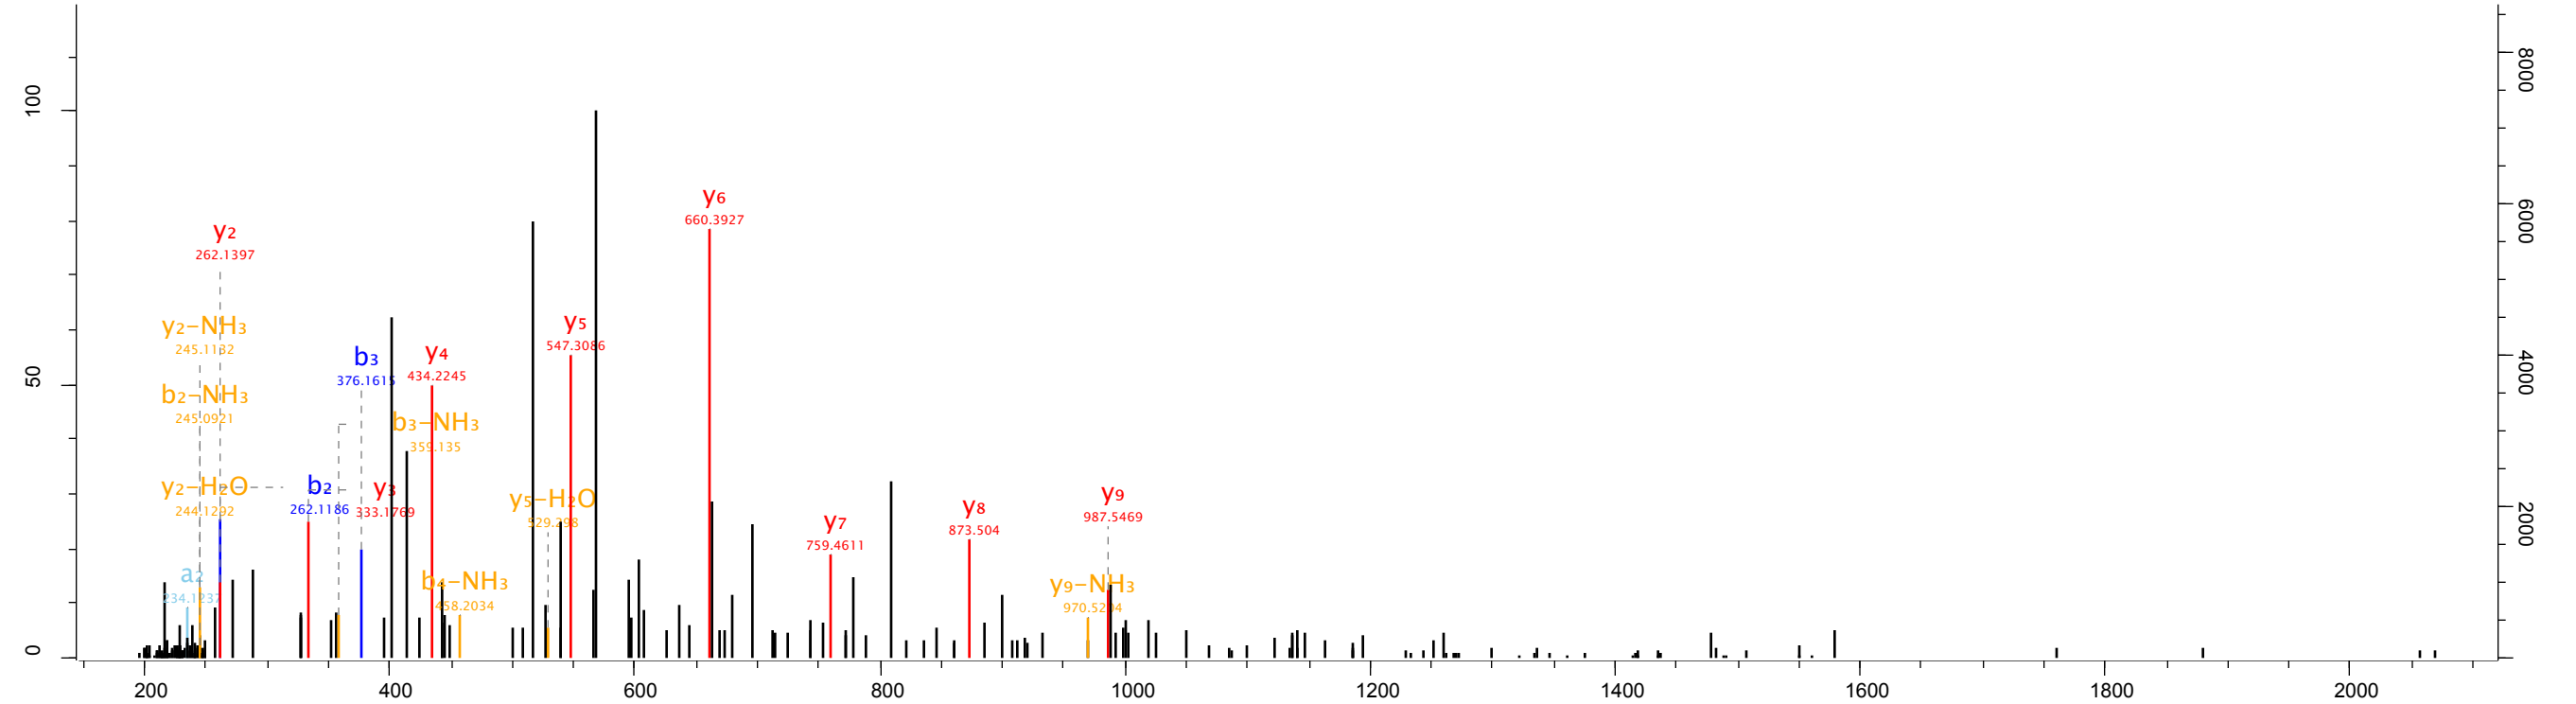

Raw file

UPS1+500ngY\_90minTop17\_BC4\_01\_358

| Scan  | Method   | Score | Mass    | Gene names |
|-------|----------|-------|---------|------------|
| 38992 | TOF; CID | 55.01 | 1631.84 | ATP4       |

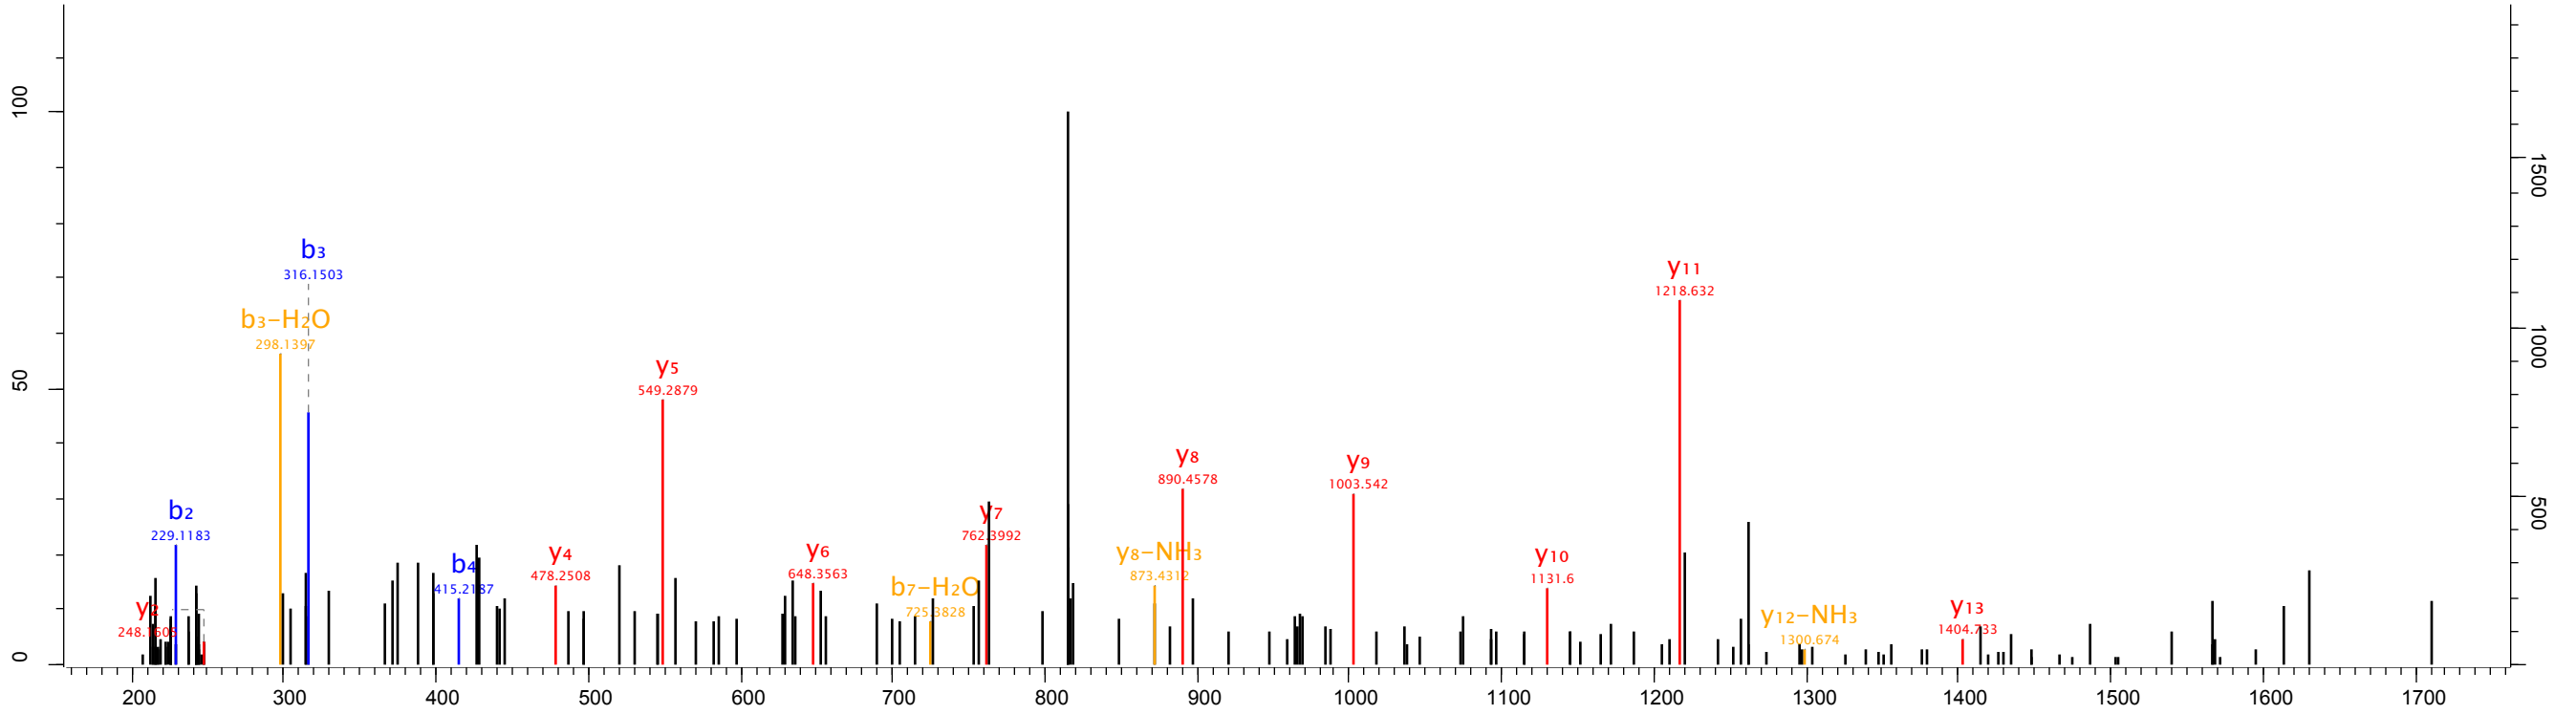

Raw file  
UPS1+500ngY\_90minTop17\_BC4\_01\_358

| Scan  | Method   | Score | Mass    | Gene names |
|-------|----------|-------|---------|------------|
| 39118 | TOF; CID | 42.72 | 1153.51 | YER134C    |

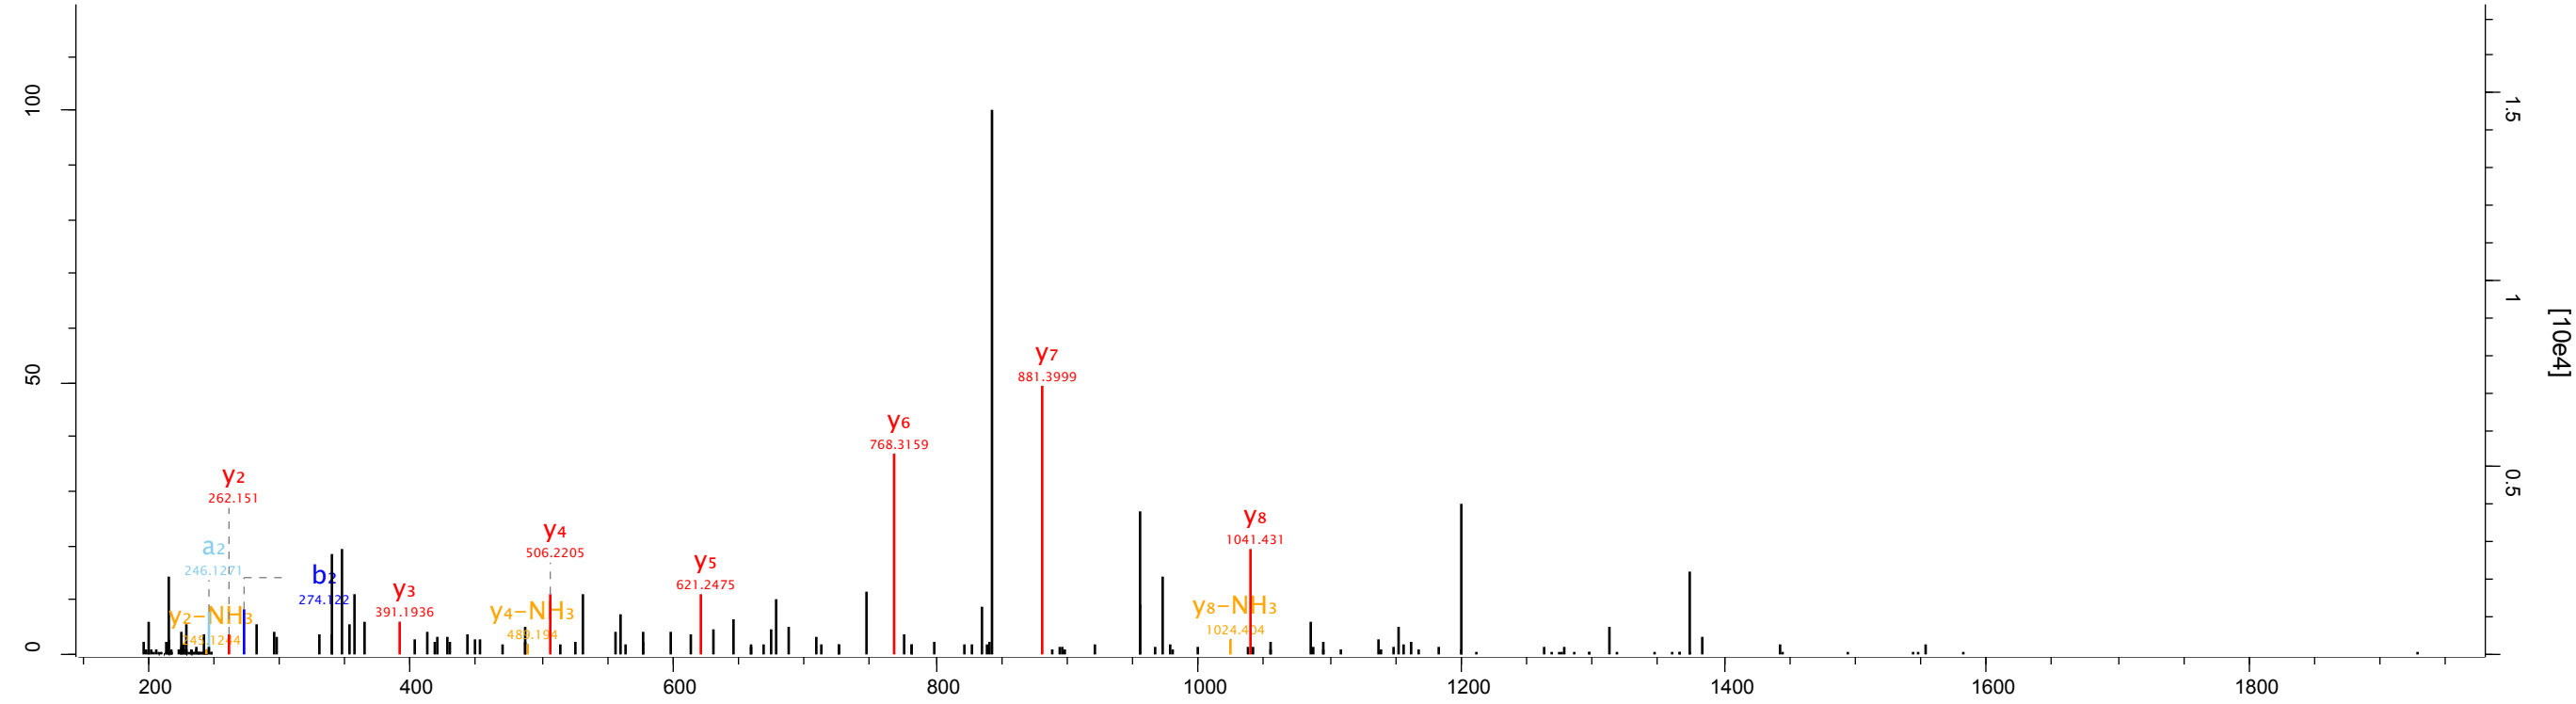

[10e4]

Raw file

UPS1+500ngY\_90minTop17\_BC4\_01\_358

| Scan  | Method   | Score | Mass    | Gene names |
|-------|----------|-------|---------|------------|
| 39830 | TOF; CID | 57.17 | 1185.64 | SWP1       |

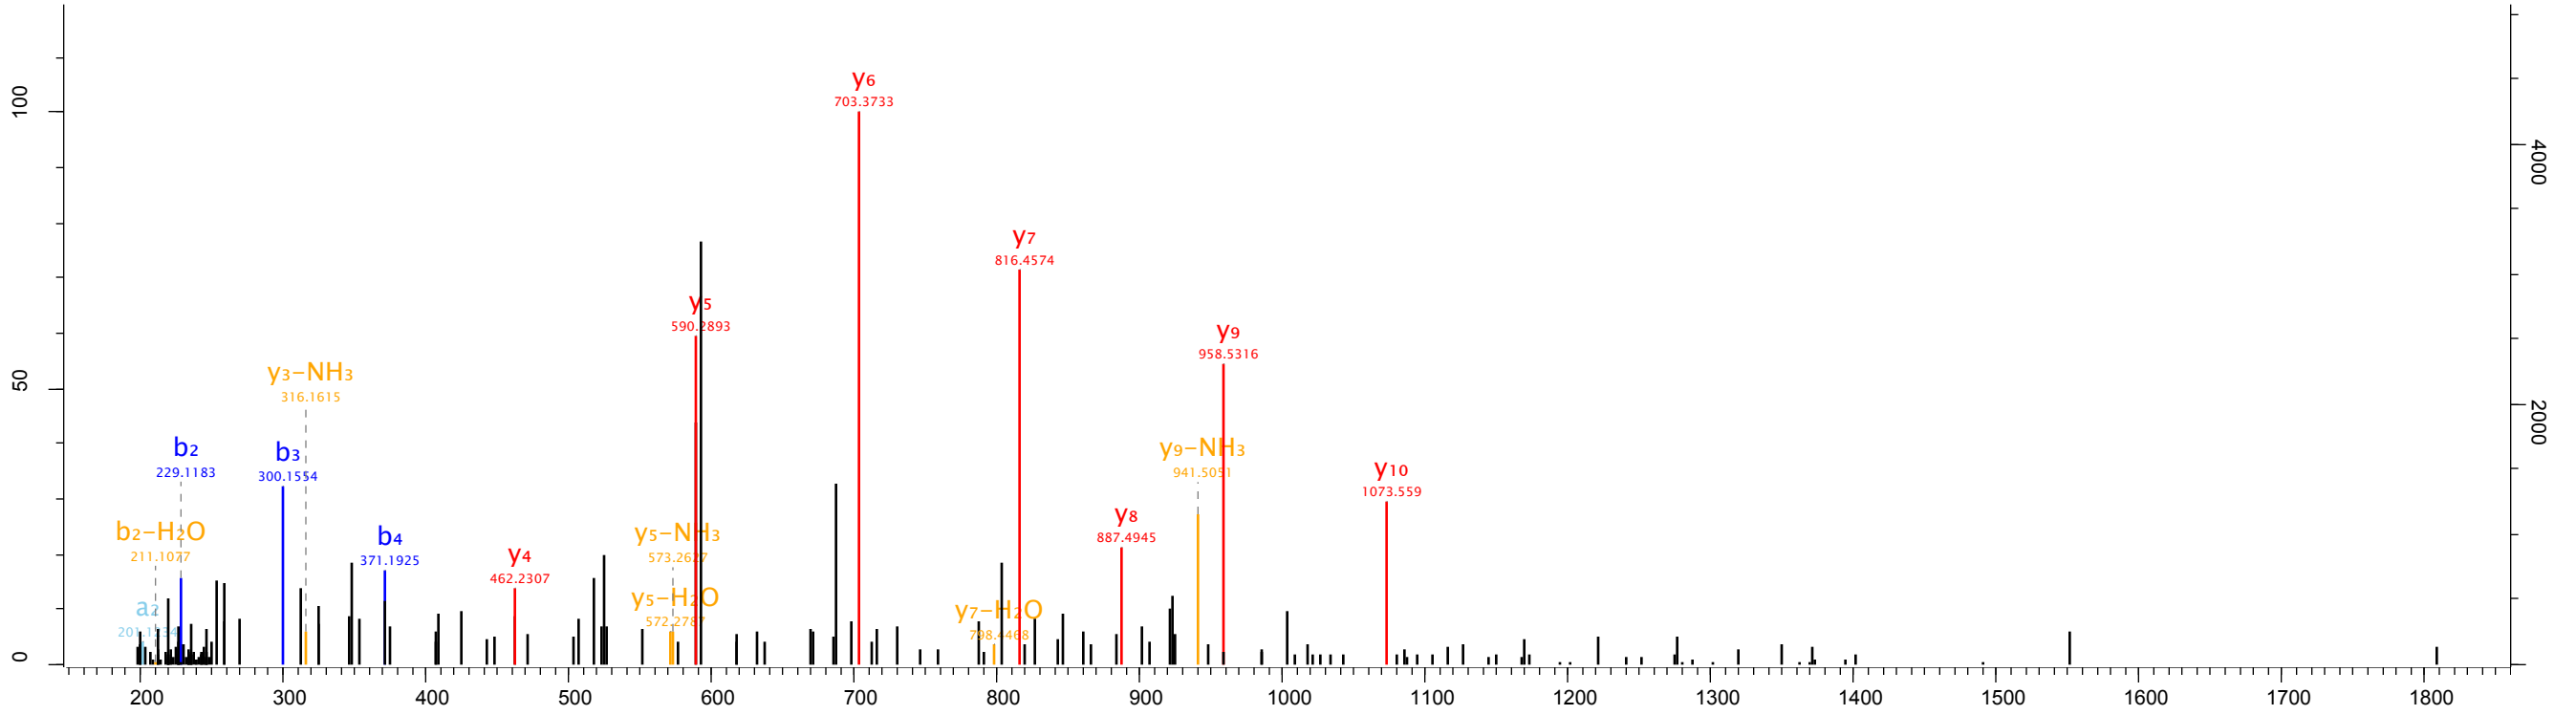

4000  
2000



Raw file  
UPS1+500ngY\_90minTop17\_BC4\_01\_358

| Scan  | Method   | Score | Mass    | Gene names |
|-------|----------|-------|---------|------------|
| 40348 | TOF; CID | 54.2  | 1426.72 | FCY1       |

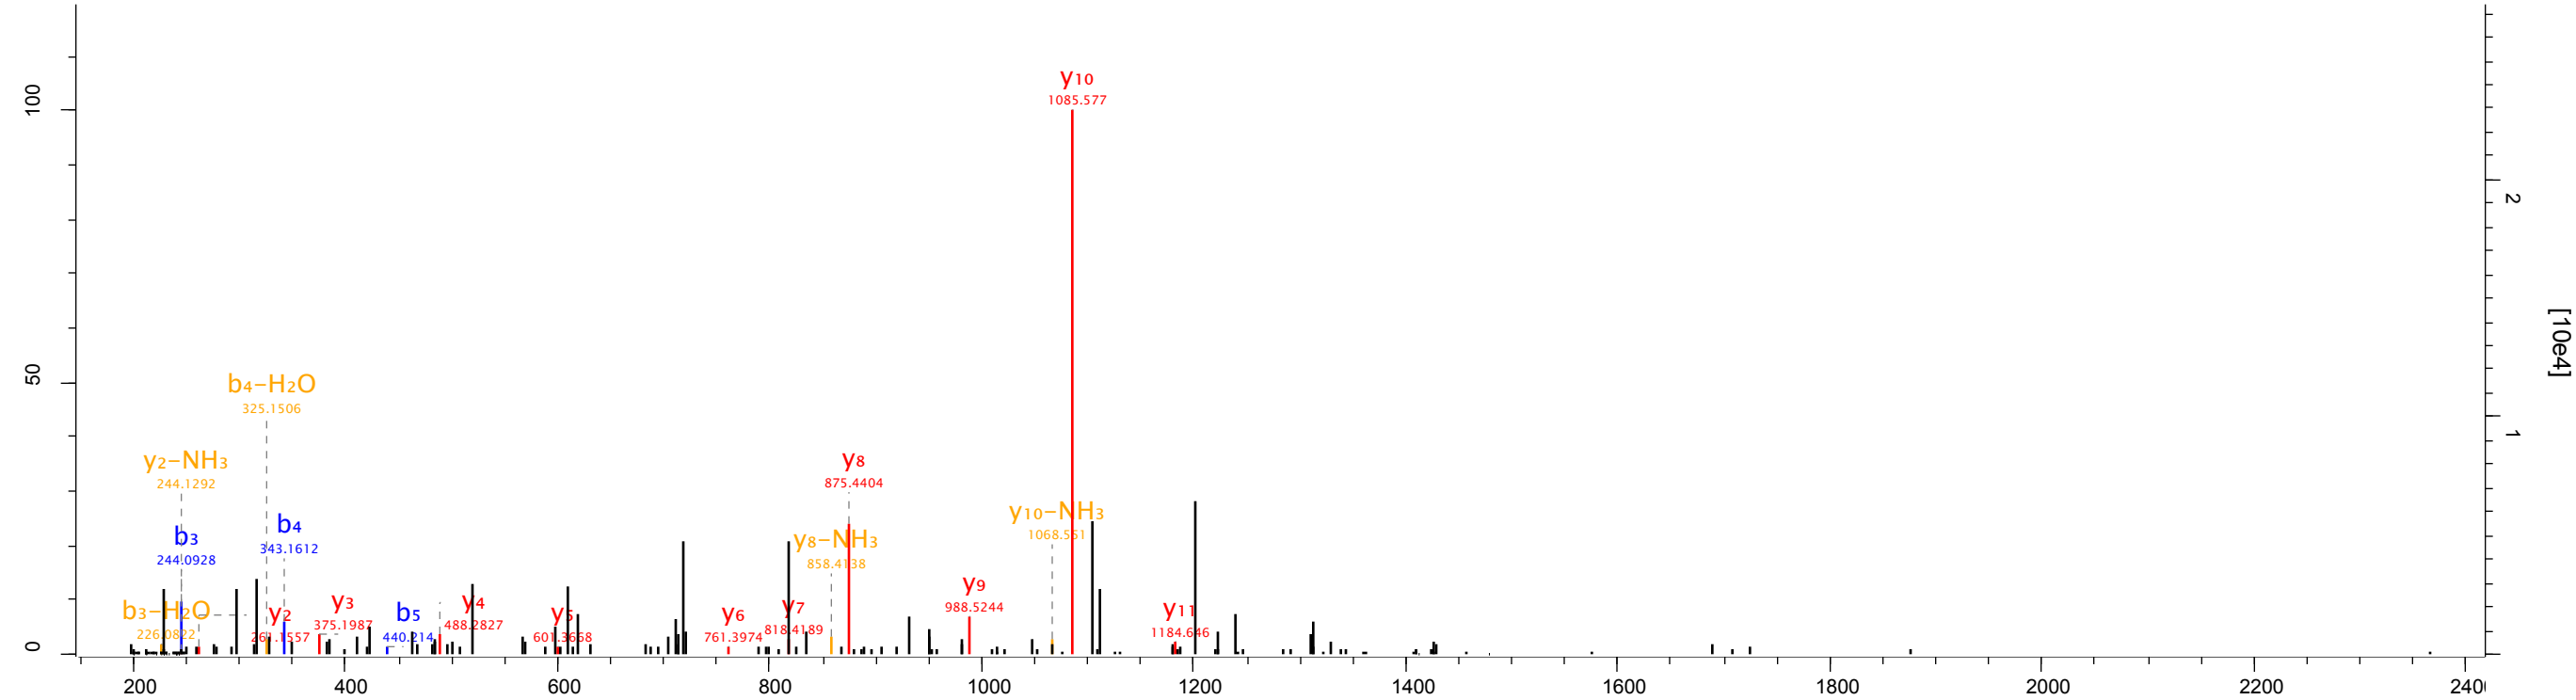

Raw file  
UPS1+500ngY\_90minTop17\_BC4\_01\_358

Scan 40543  
Method TOF; CID  
Score 76.33  
Mass 1473.64

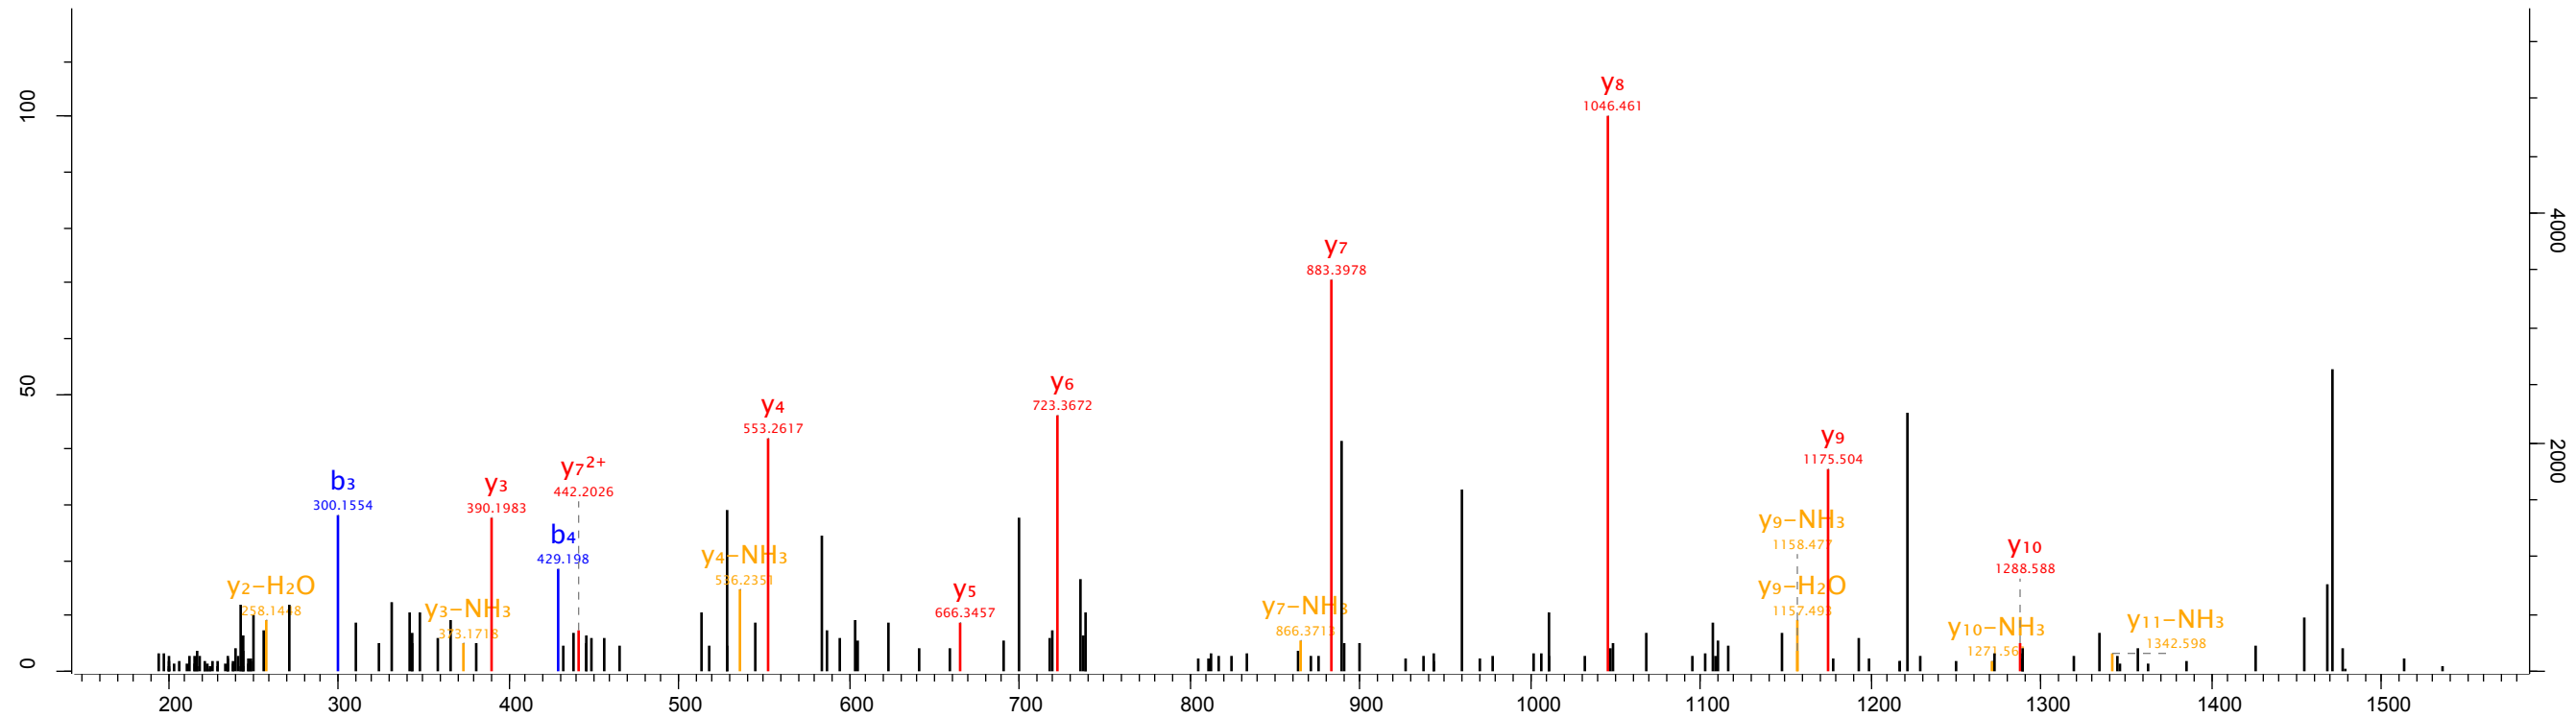

Raw file

UPS1+500ngY\_90minTop17\_BC4\_01\_358

Scan

40612

Method

TOF; CID

Score

44.67

Mass

1931.9

Gene names

NPL6

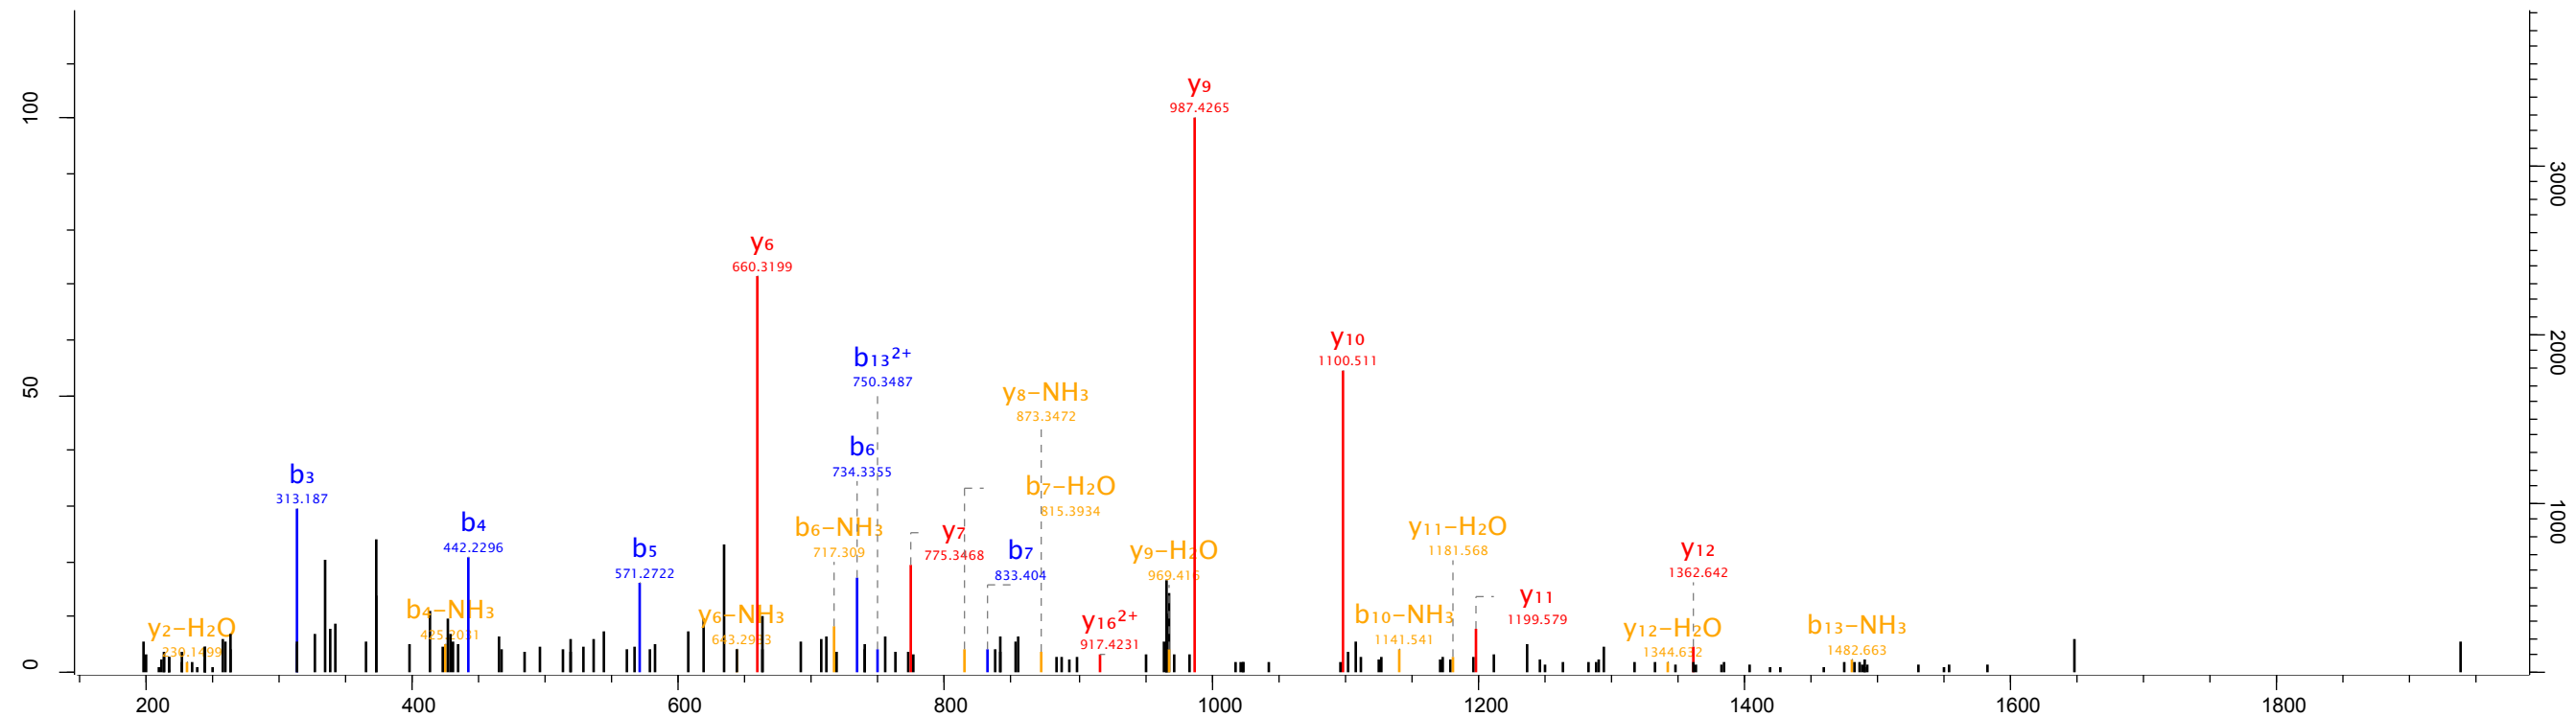

Raw file  
UPS1+500ngY\_90minTop17\_BC4\_01\_358

| Scan  | Method   | Score | Mass    | Gene names |
|-------|----------|-------|---------|------------|
| 40902 | TOF; CID | 47.19 | 1060.56 | CKA1       |

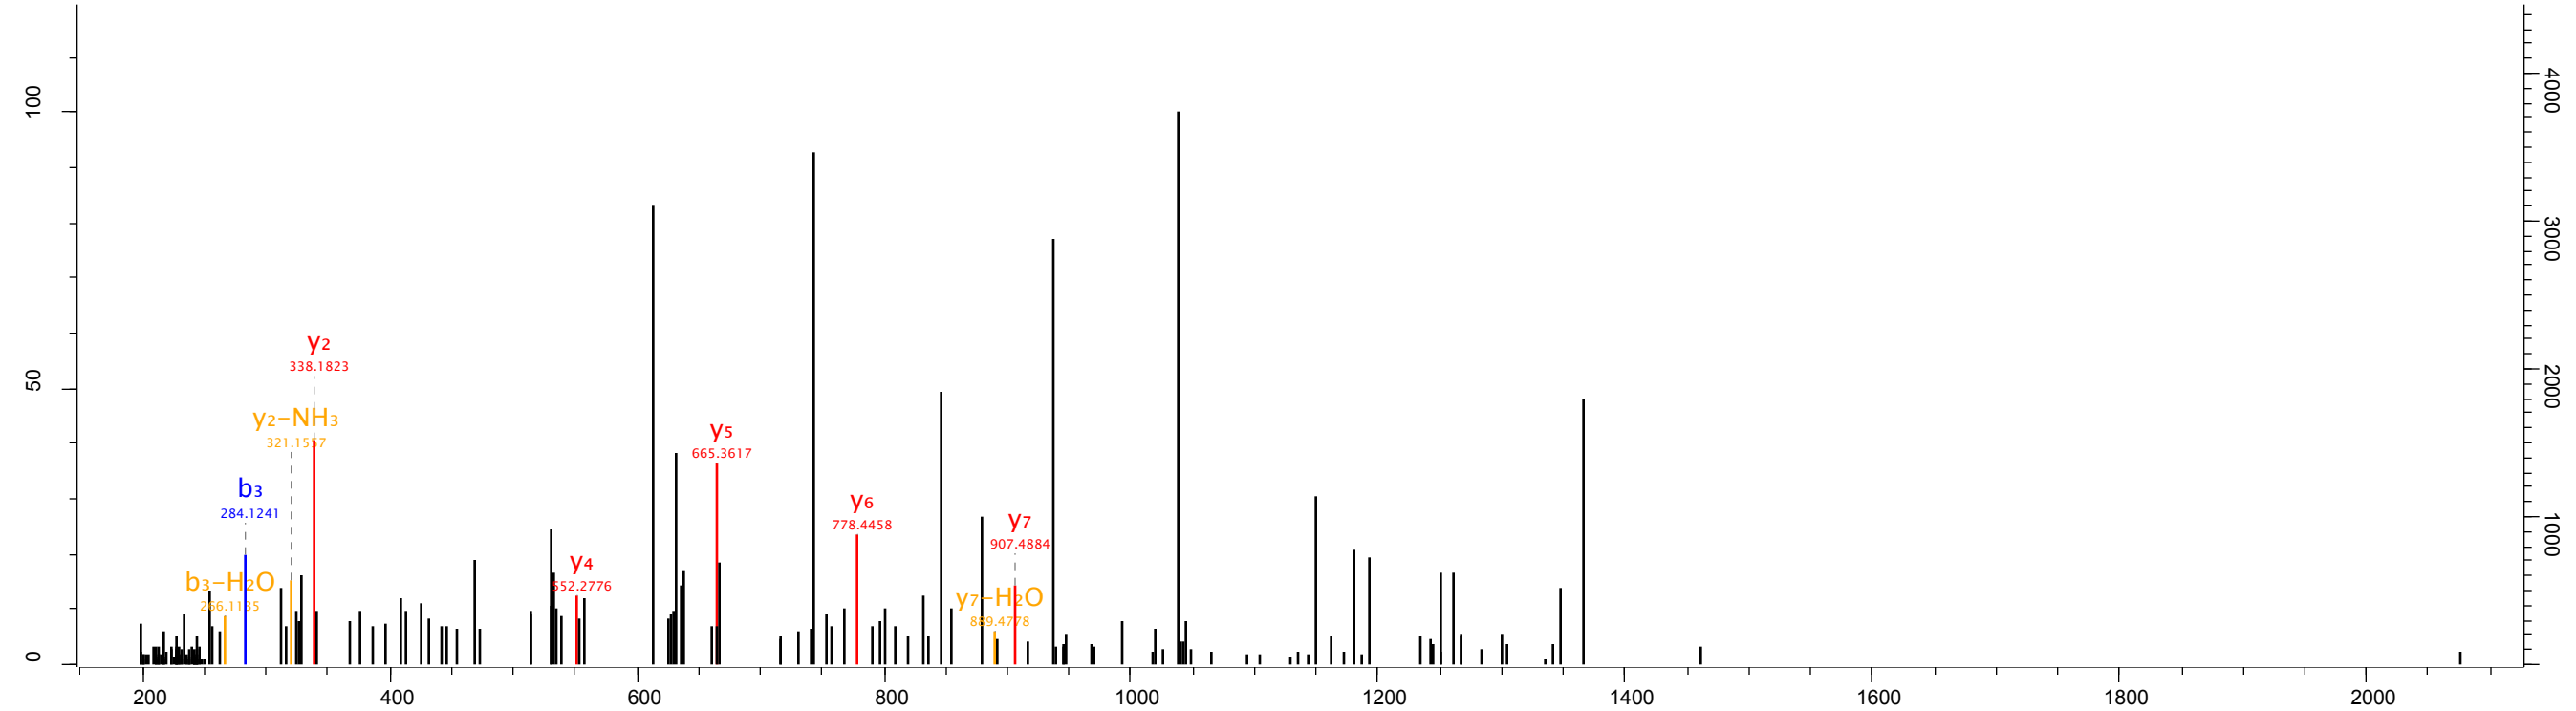

Raw file

UPS1+500ngY\_90minTop17\_BC4\_01\_358

Scan  
40931Method  
TOF; CIDScore  
47.6Mass  
970.54Gene names  
UTP4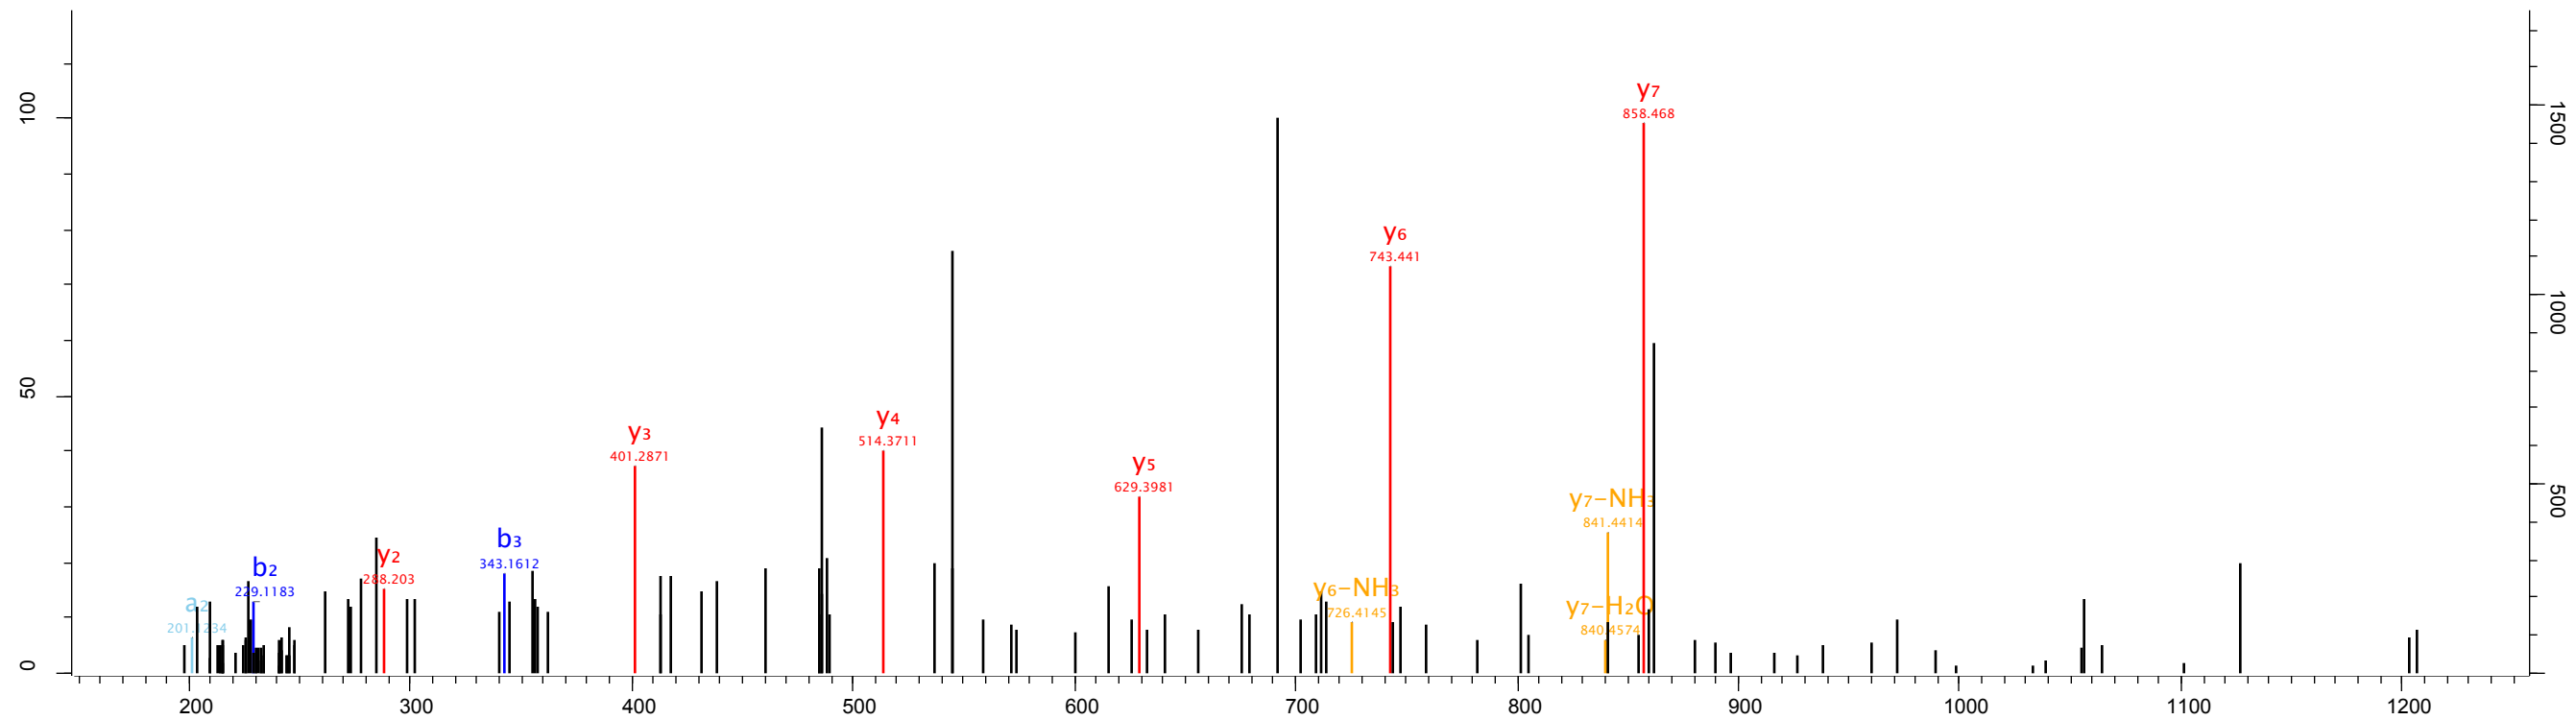

Raw file

UPS1+500ngY\_90minTop17\_BC4\_01\_358

| Scan  | Method   | Score | Mass   | Gene names |
|-------|----------|-------|--------|------------|
| 41013 | TOF; CID | 41.99 | 1974.9 | TLG2       |

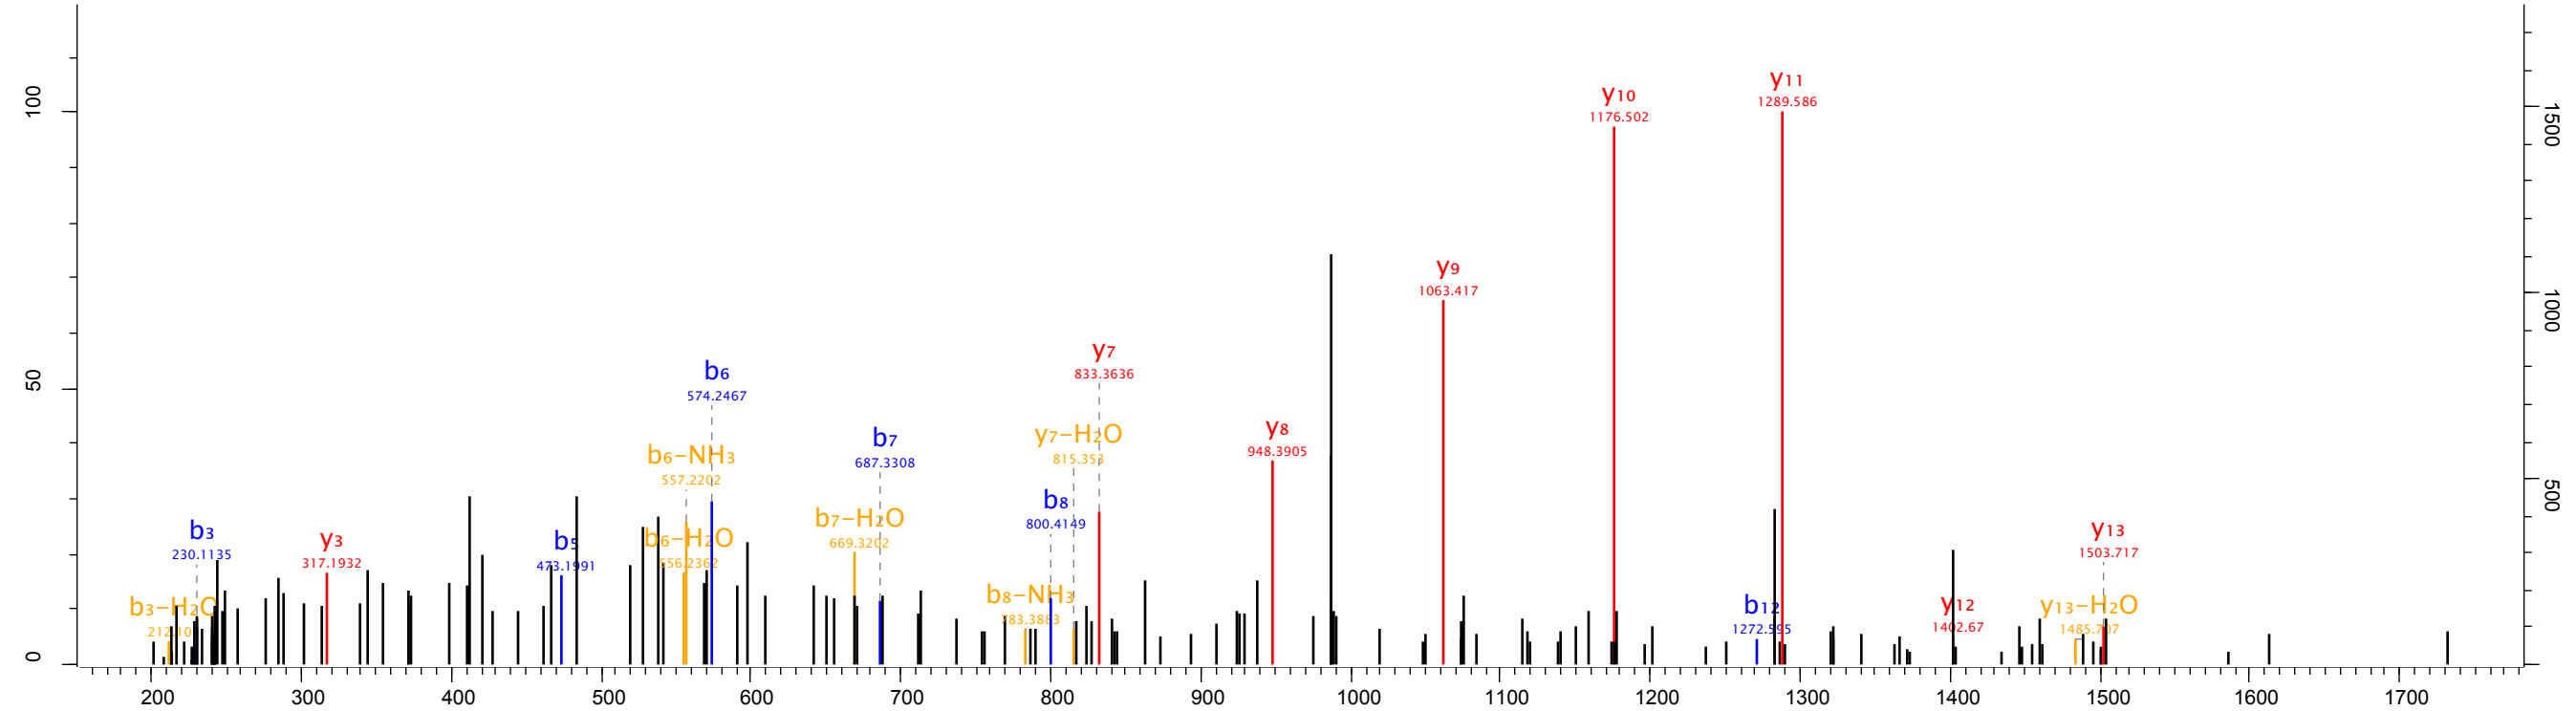

Raw file  
UPS1+500ngY\_90minTop17\_BC4\_01\_358

| Scan  | Method   | Score | Mass    | Gene names |
|-------|----------|-------|---------|------------|
| 41308 | TOF; CID | 72.32 | 1692.83 | ALG6       |

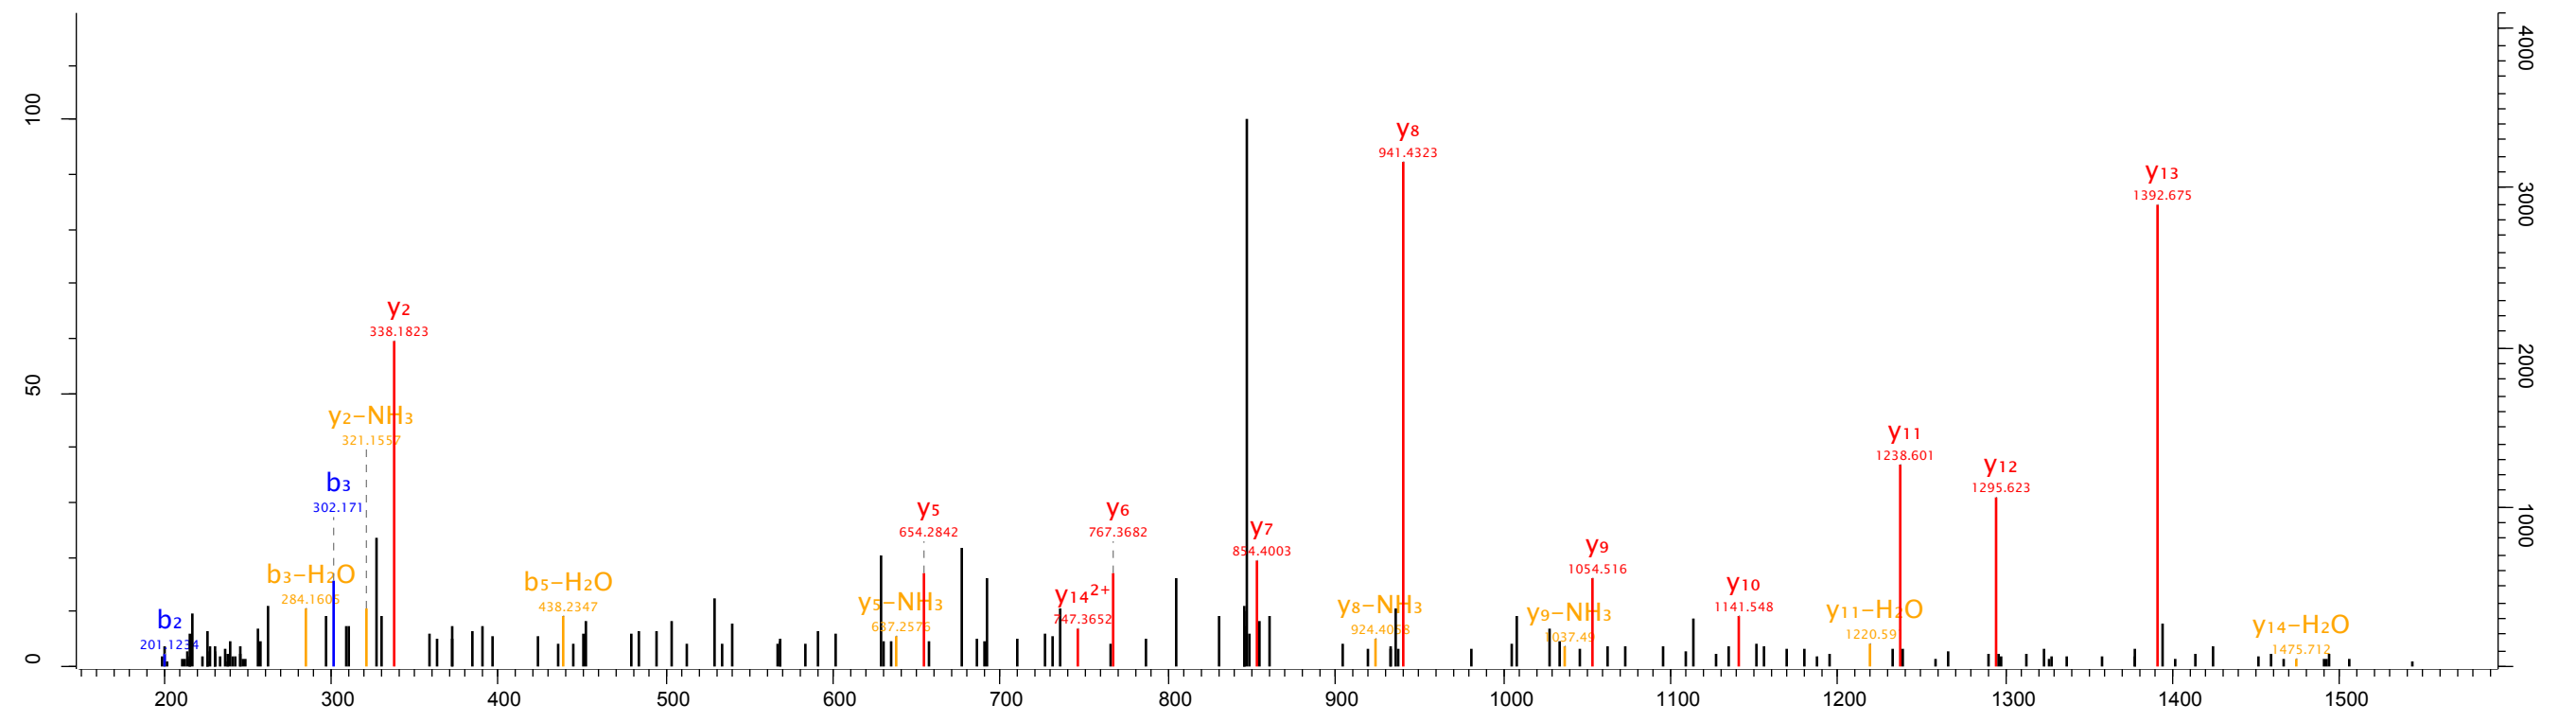

Raw file

UPS1+500ngY\_90minTop17\_BC4\_01\_358

Scan

41318

Method

TOF; CID

Score

101.75

Mass

1729.8

Gene names

RPB9

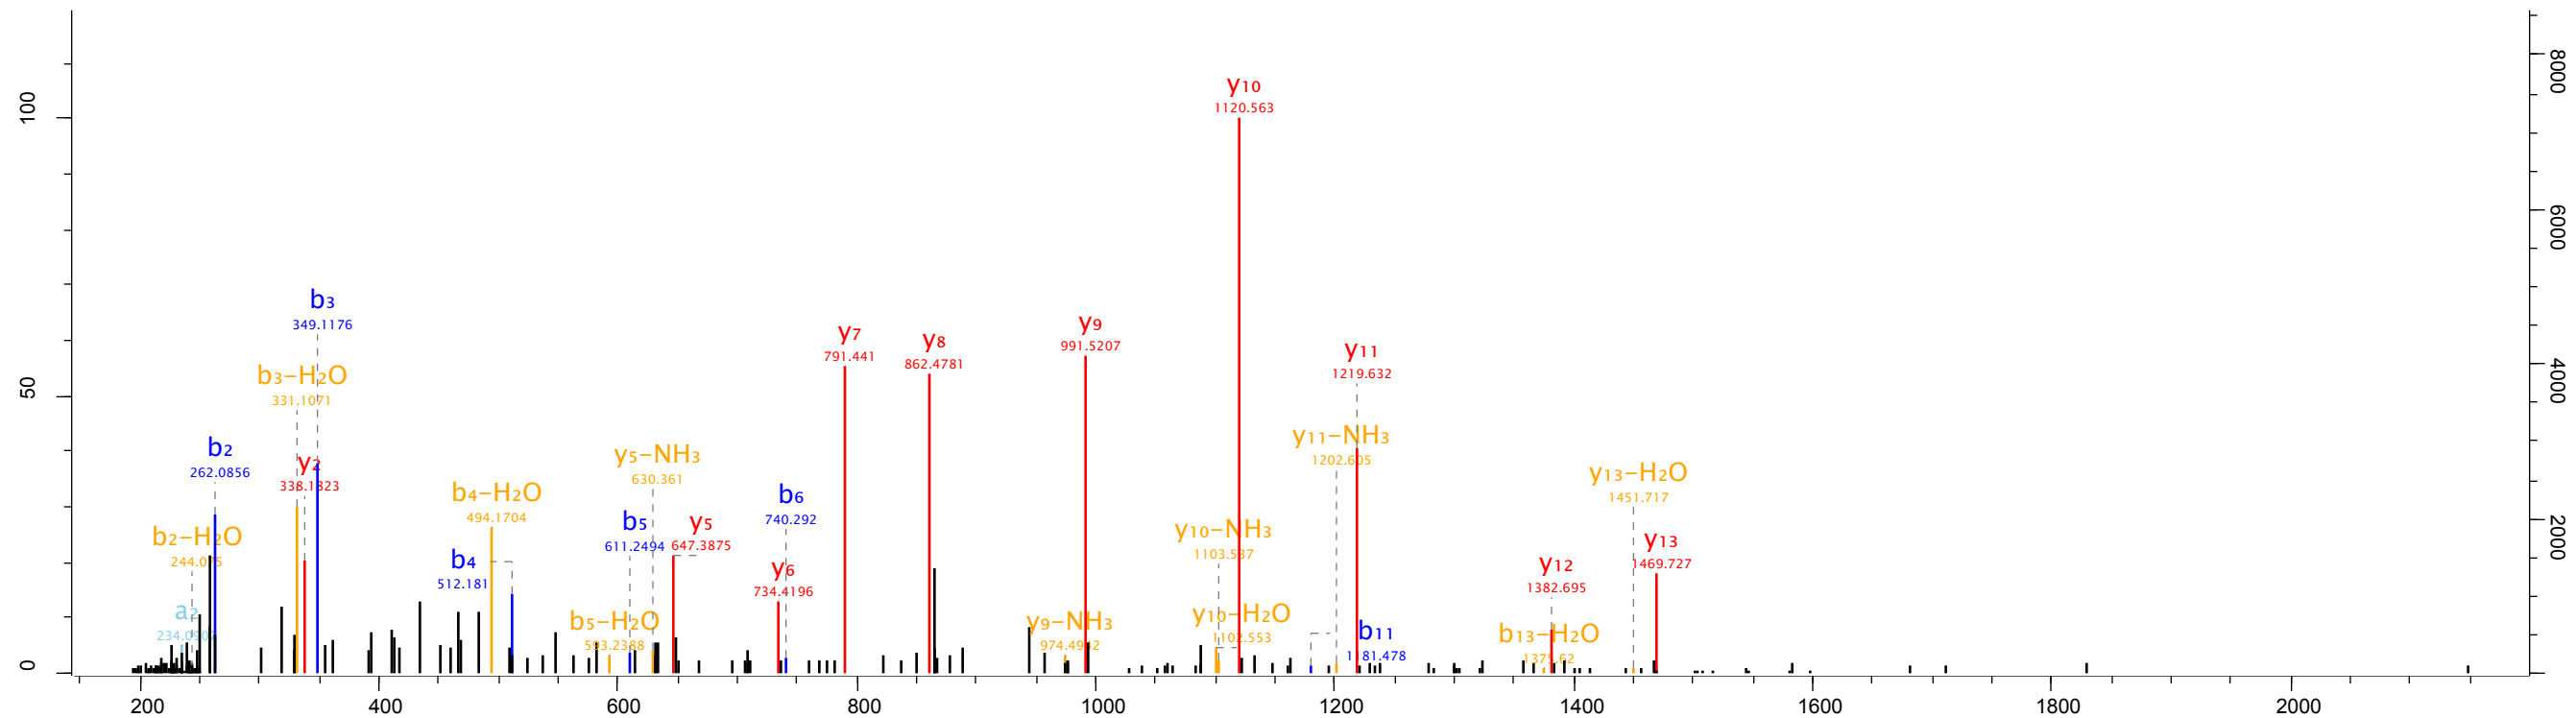



Raw file  
UPS1+500ngY\_90minTop17\_BC4\_01\_358

Scan: 41320  
Method: TOF; CID  
Score: 47.57  
Mass: 913.55  
Gene names: NKPI

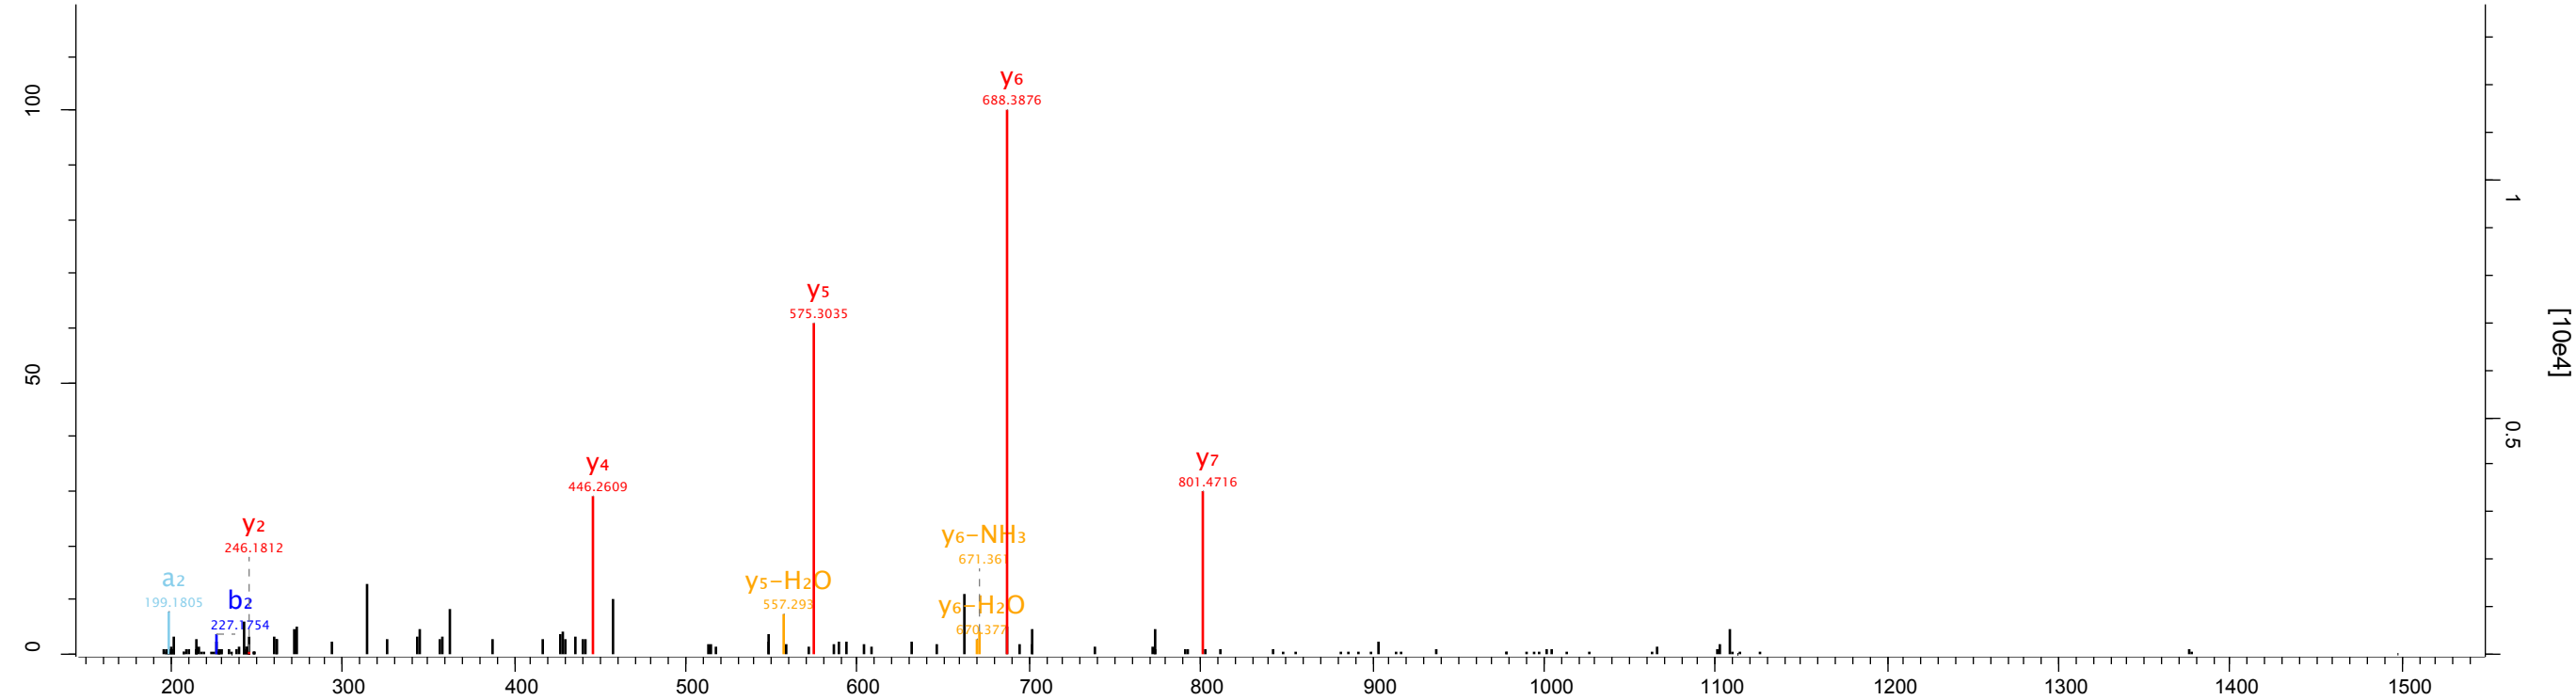

Raw file

UPS1+500ngY\_90minTop17\_BC4\_01\_358

Scan

41323

Method

TOF; CID

Score

64.58

Mass

1825.91

Gene names

SMF3

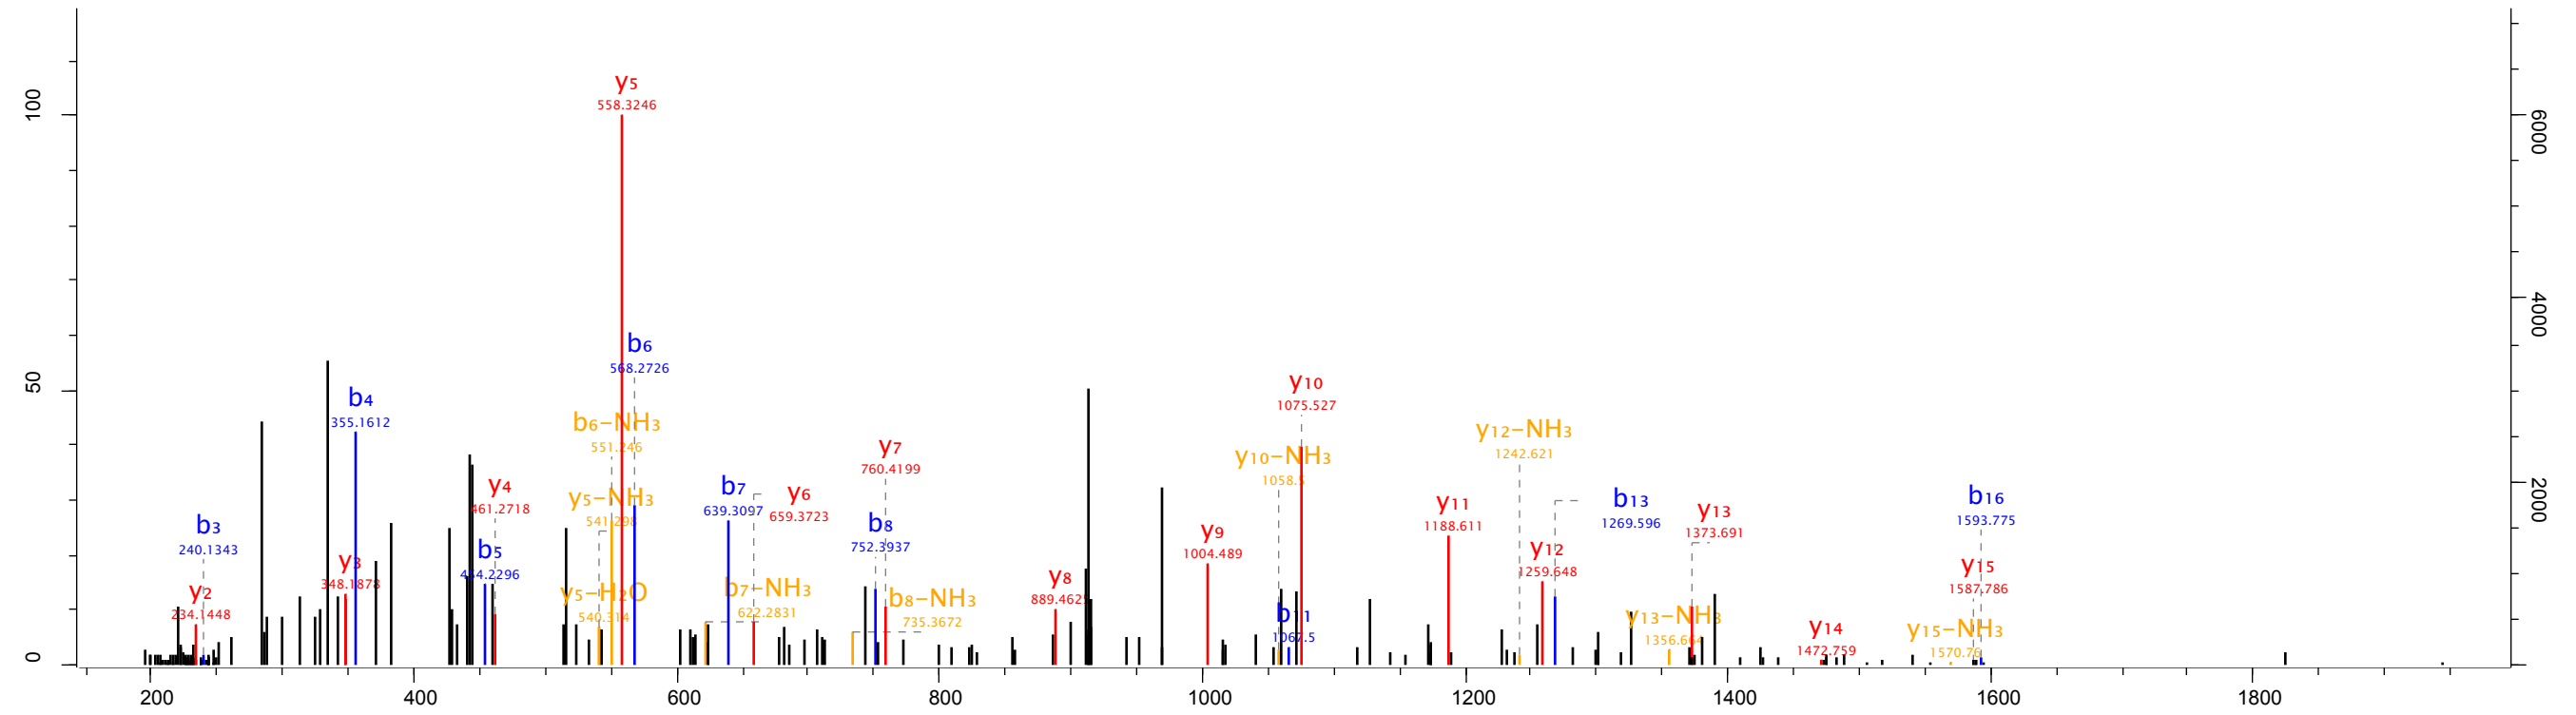

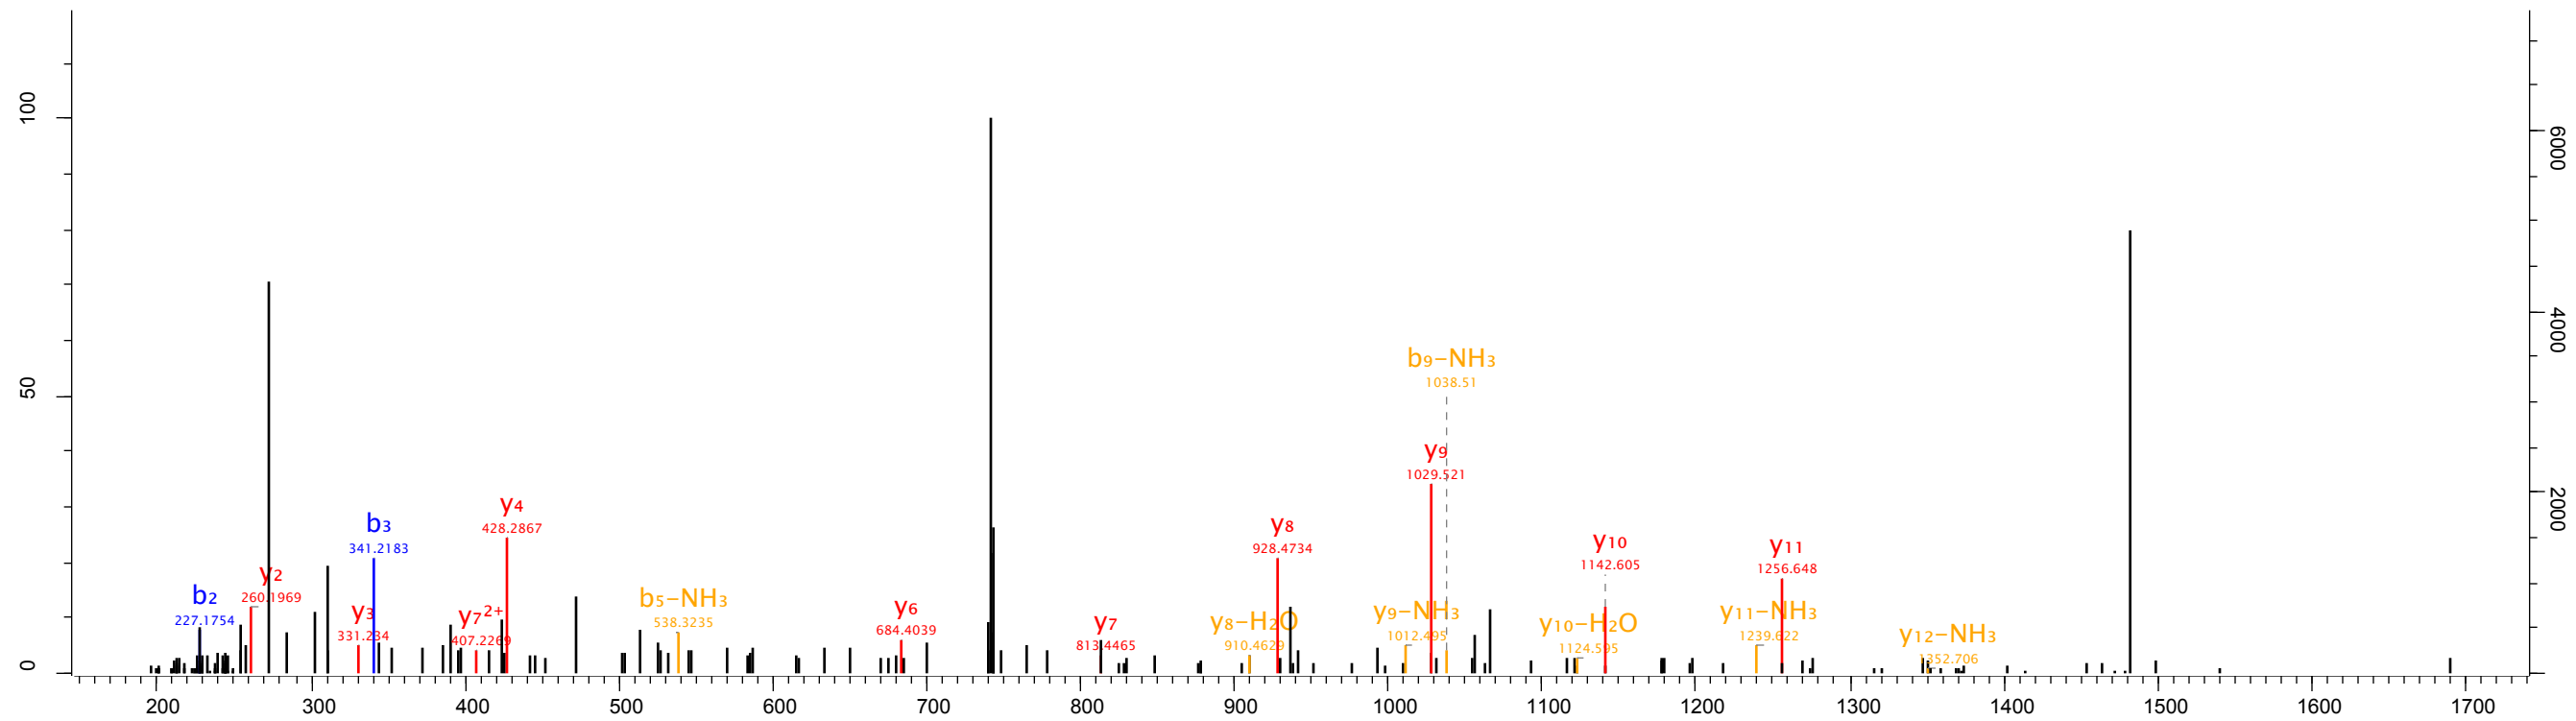

Raw file  
UPS1+500ngY\_90minTop17\_BC4\_01\_358

| Scan  | Method   | Score | Mass    | Gene names |
|-------|----------|-------|---------|------------|
| 41995 | TOF; CID | 98.9  | 1626.63 | MDM35      |

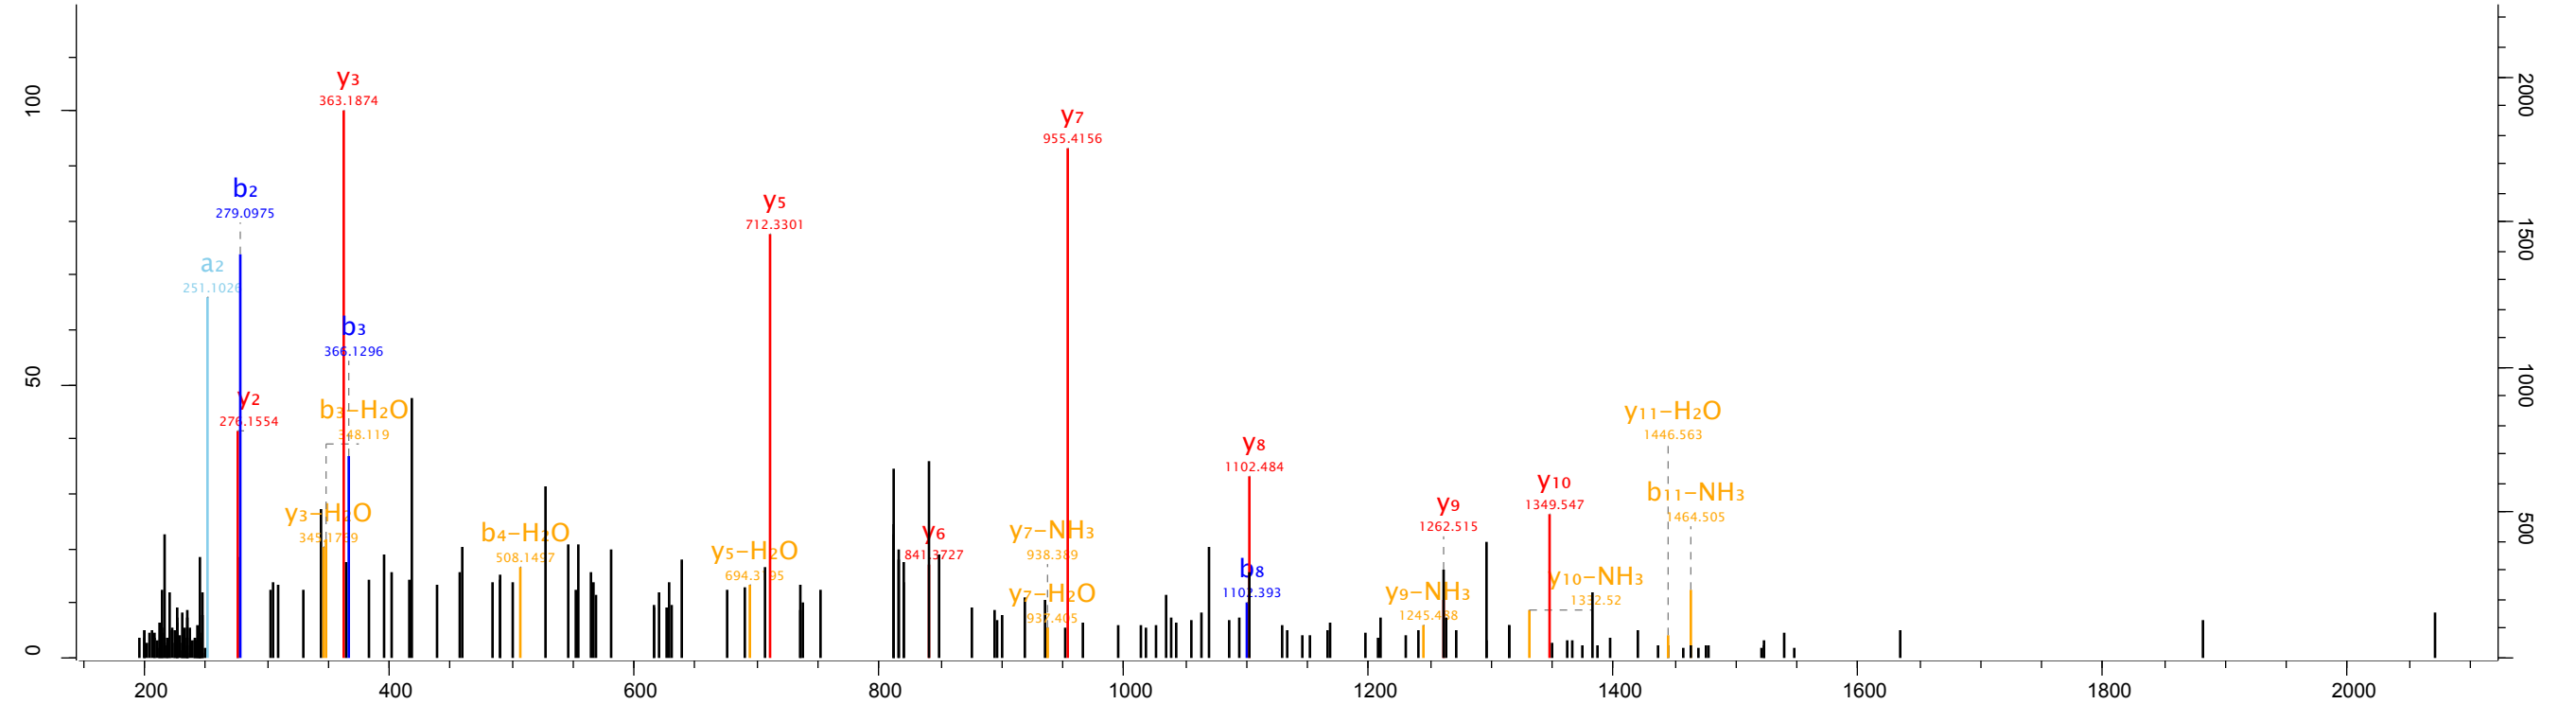

Raw file  
UPS1+500ngY\_90minTop17\_BC4\_01\_358

| Scan  | Method   | Score | Mass    | Gene names |
|-------|----------|-------|---------|------------|
| 42186 | TOF; CID | 64.12 | 1260.62 | ENT1       |

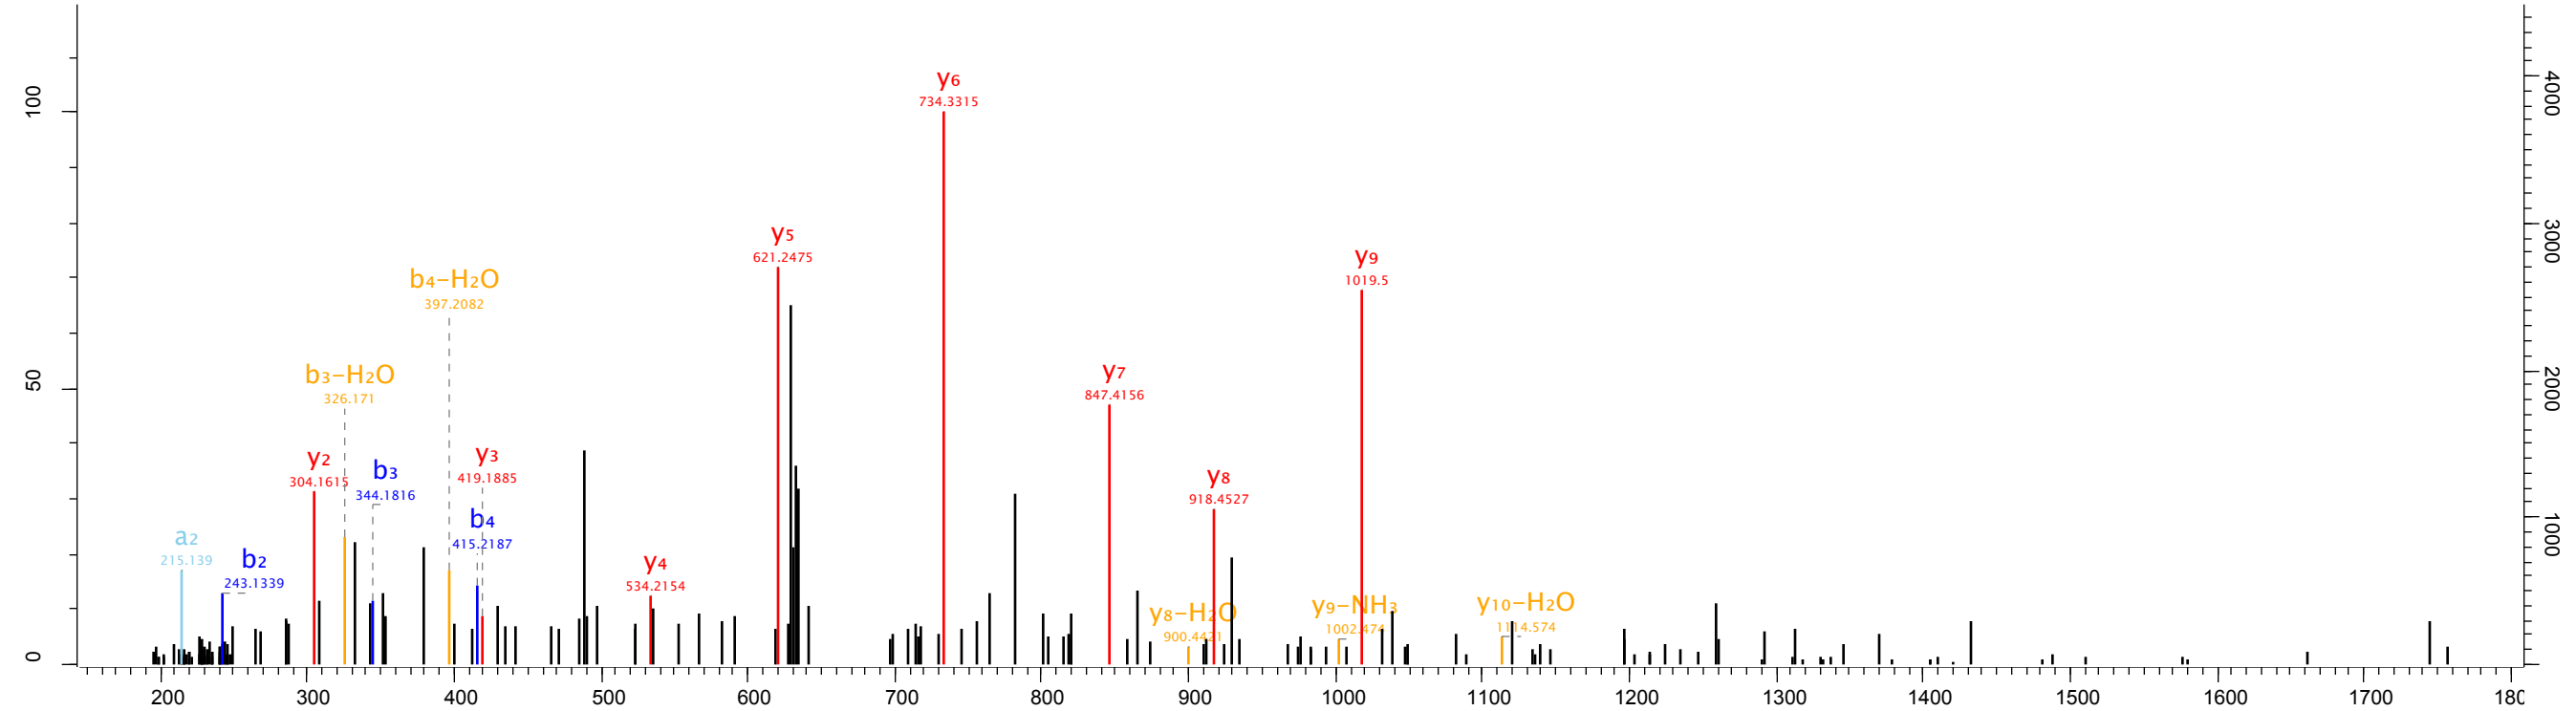

Raw file

UPS1+500ngY\_90minTop17\_BC4\_01\_358

Scan

42325

Method

TOF; CID

Score

113.25

Mass

1649.76

Gene names

TOM5

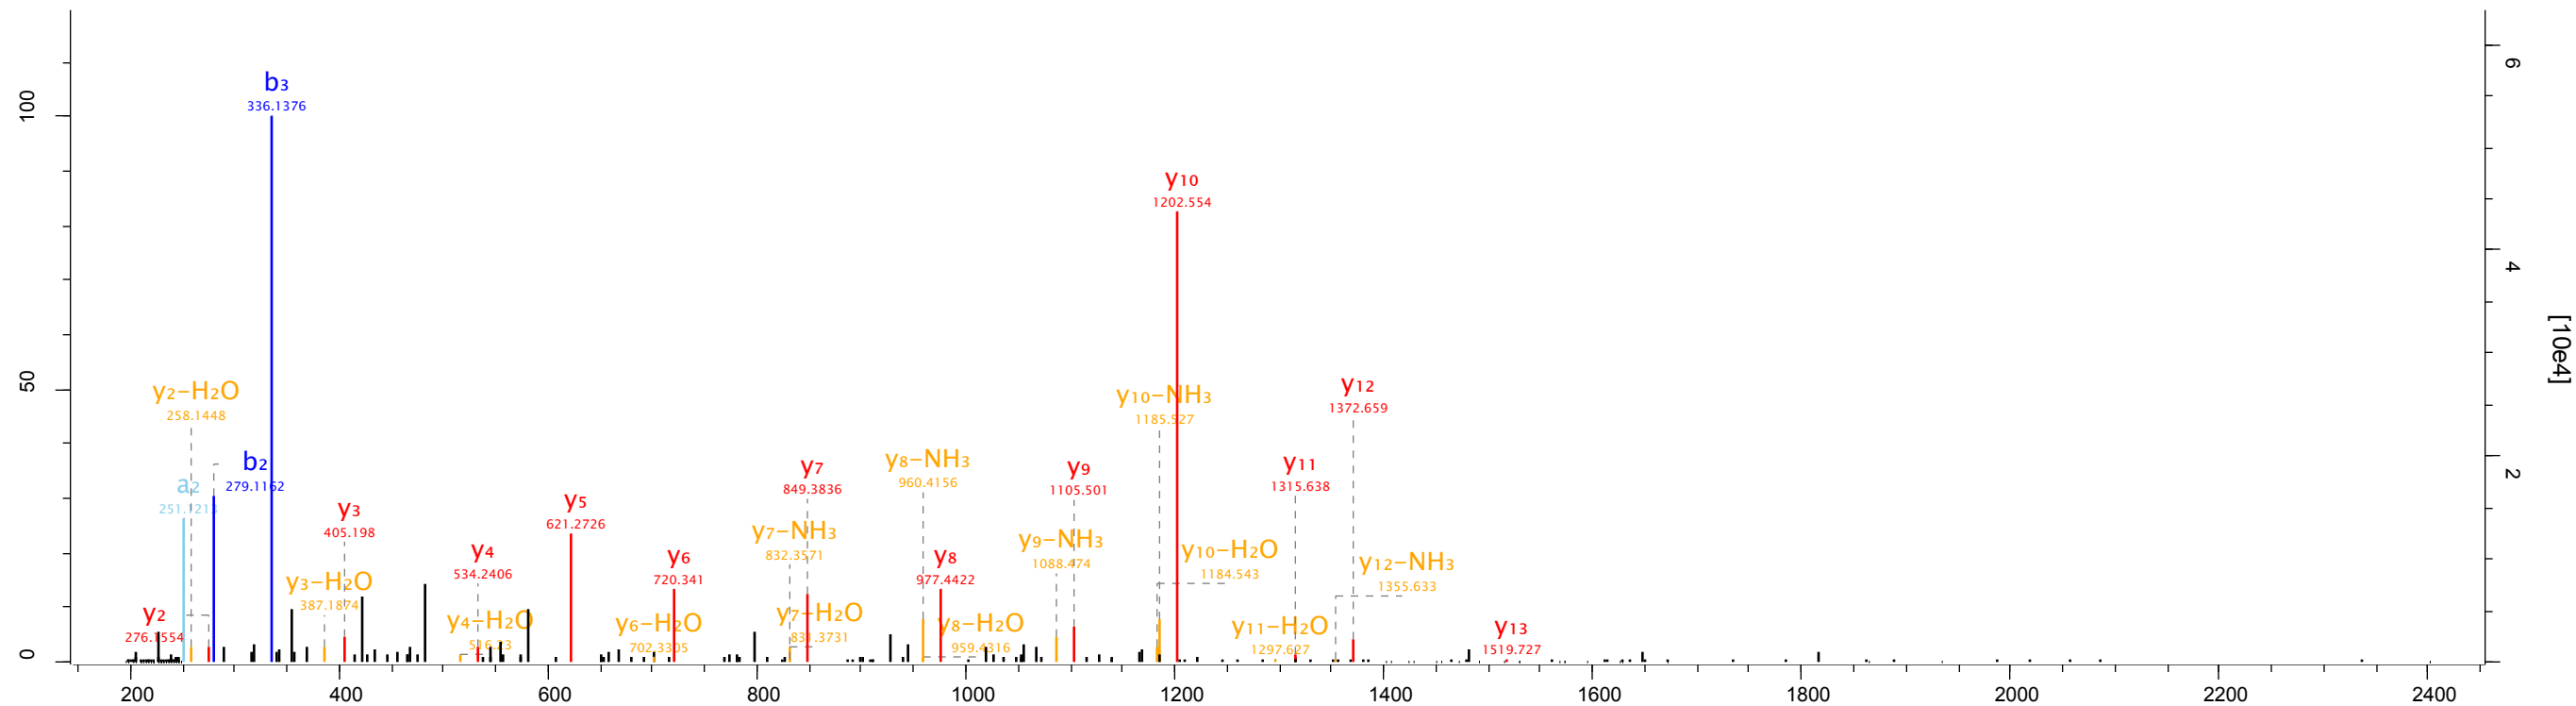

Raw file  
UPS1+500ngY\_90minTop17\_BC4\_01\_358

| Scan  | Method   | Score | Mass    | Gene names |
|-------|----------|-------|---------|------------|
| 42371 | TOF; CID | 56.72 | 2088.93 | PAM17      |

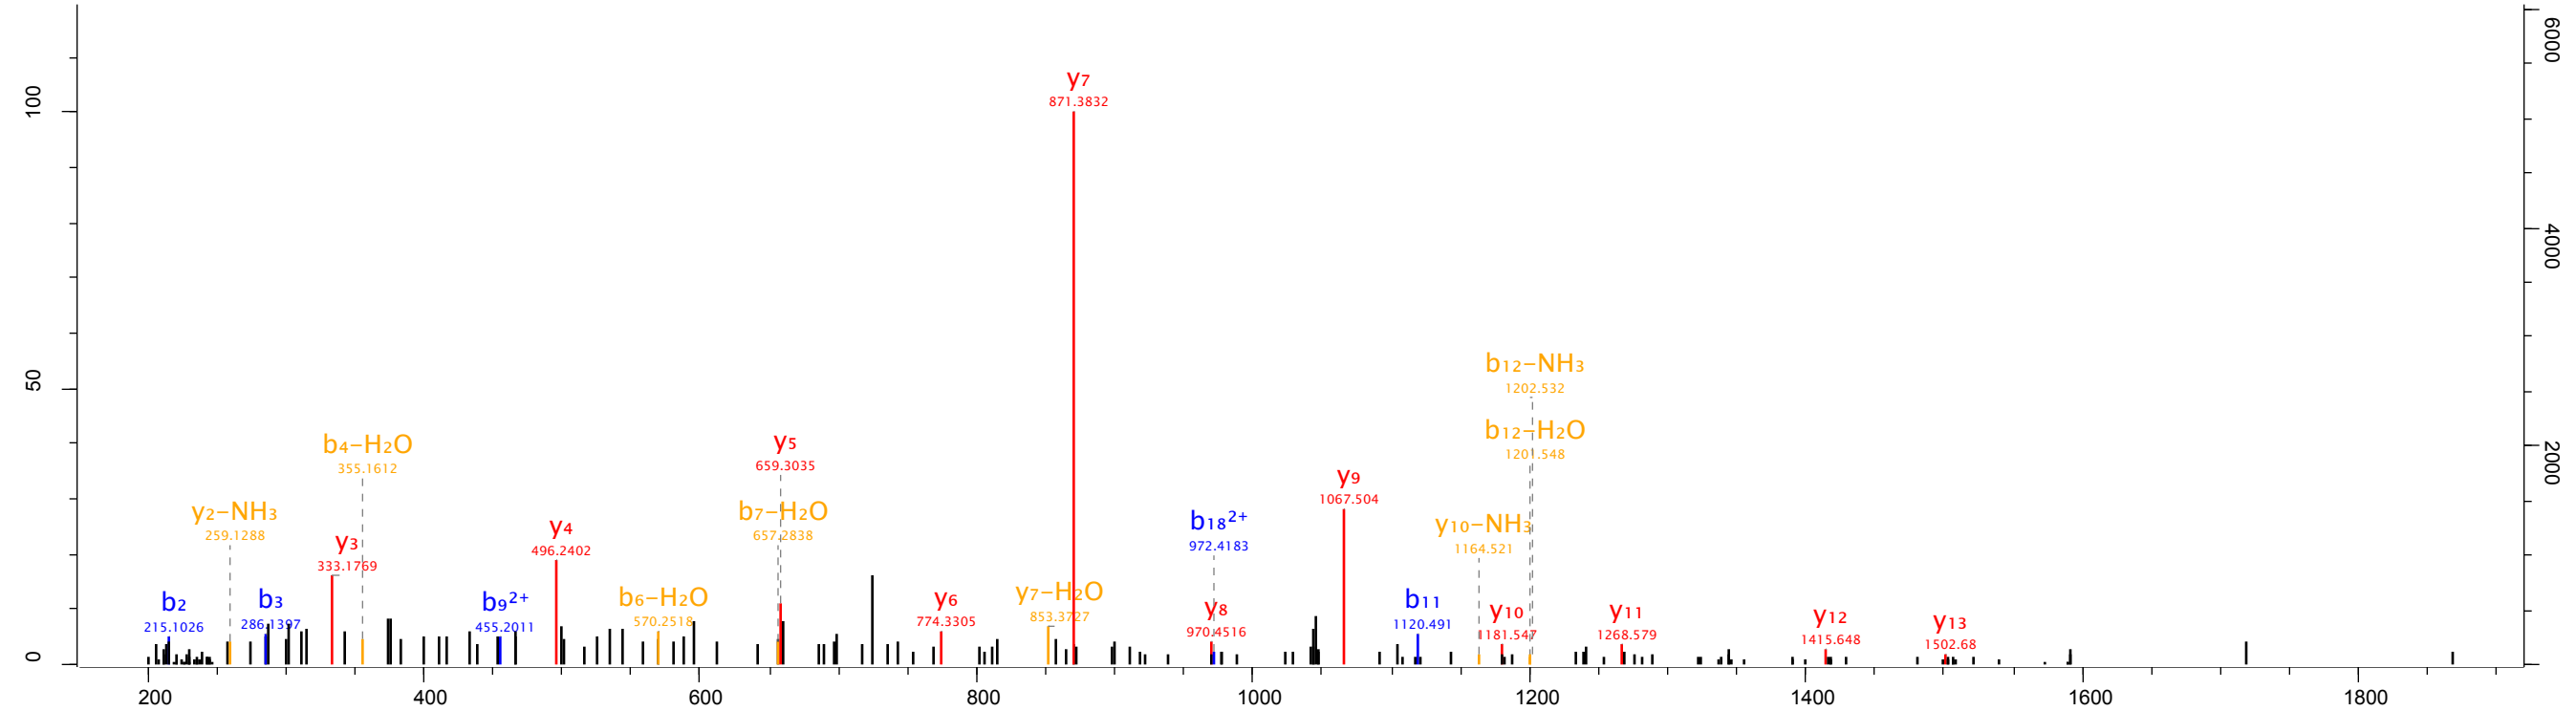

Raw file  
UPS1+500ngY\_90minTop17\_BC4\_01\_358

| Scan  | Method   | Score | Mass    | Gene names |
|-------|----------|-------|---------|------------|
| 42856 | TOF; CID | 57.43 | 1488.75 | MEX67      |

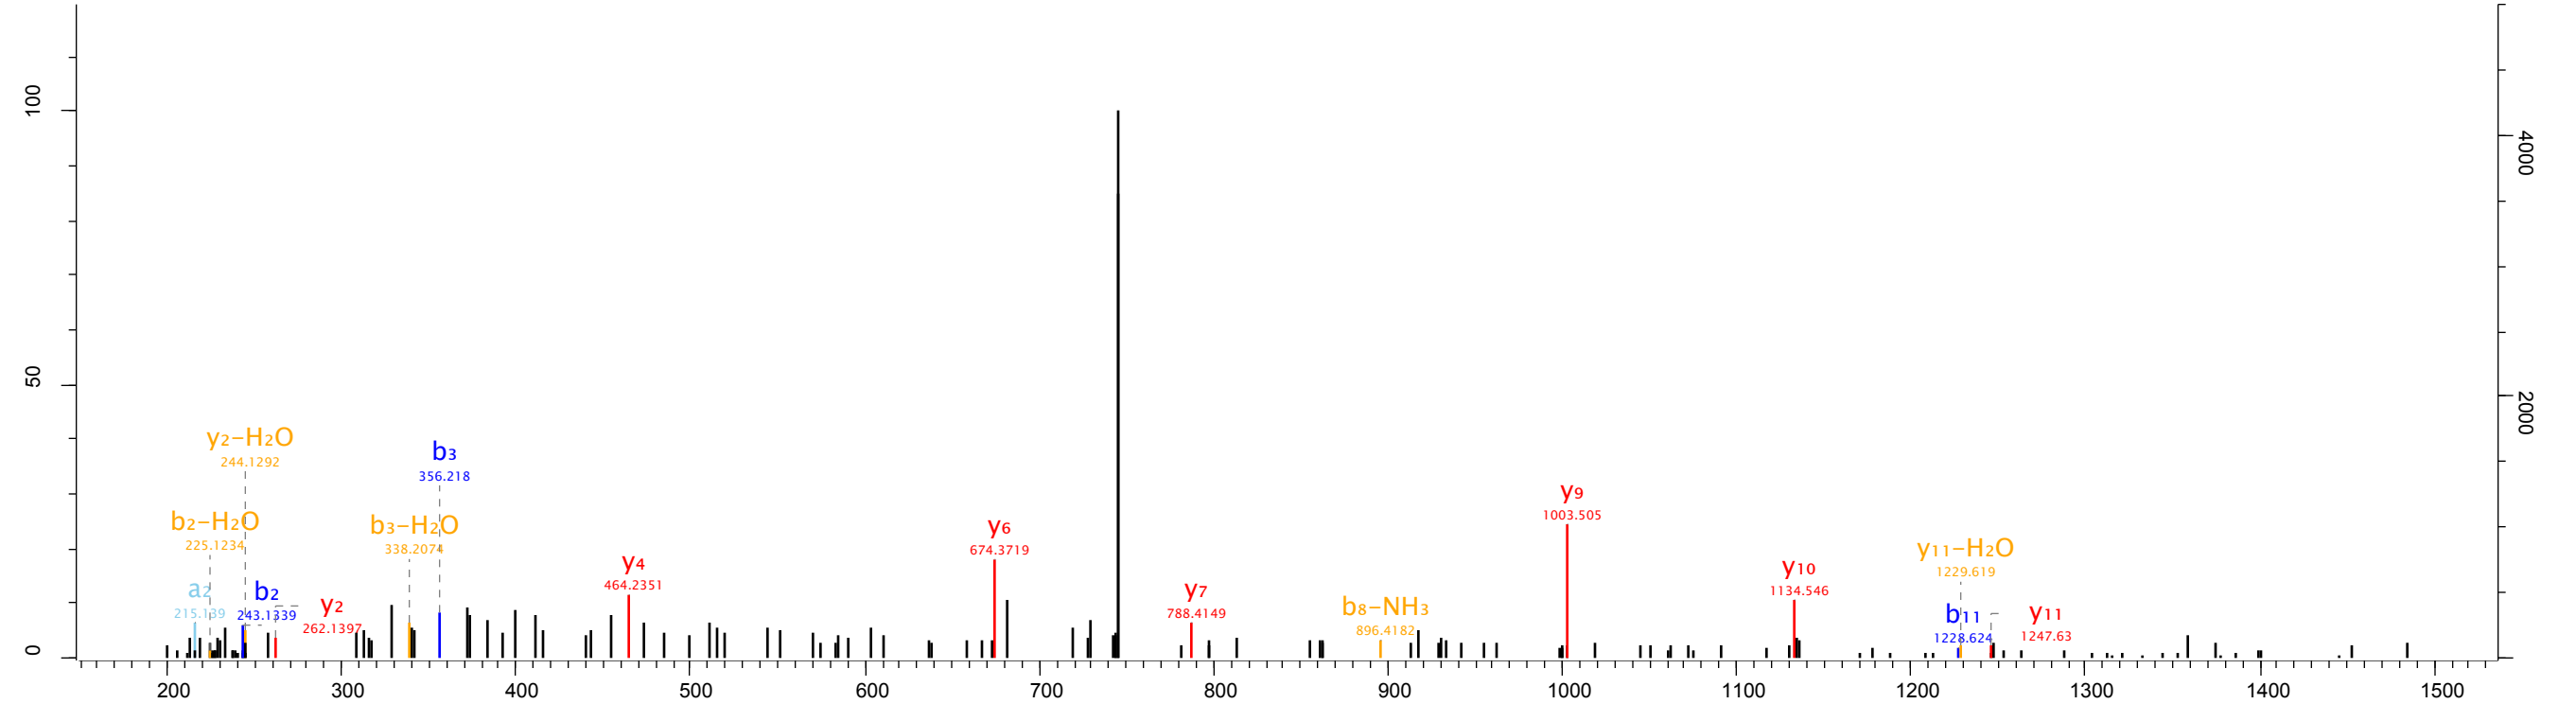



Raw file  
UPS1+500ngY\_90minTop17\_BC4\_01\_358  
Scan 42896 Method TOF; CID Score 66.83 Mass 1762.82 Gene names OPI3

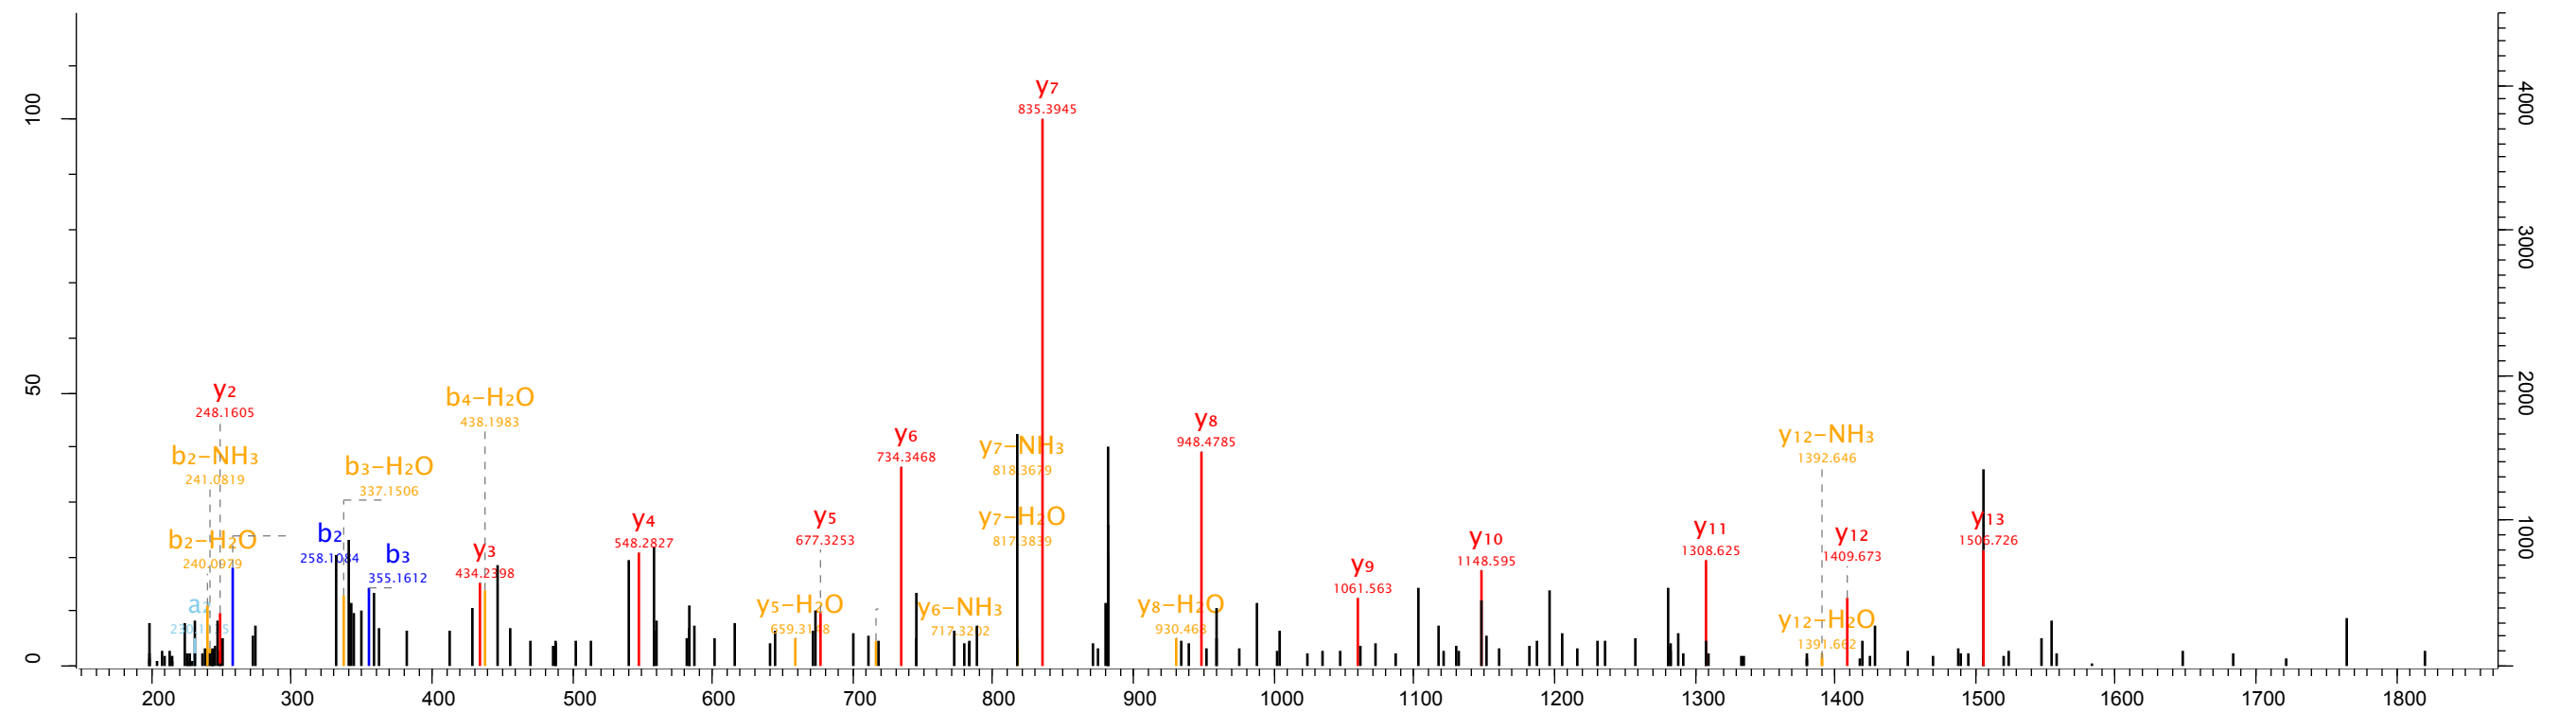

Raw file  
UPS1+500ngY\_90minTop17\_BC4\_01\_358

| Scan  | Method   | Score | Mass    | Gene names |
|-------|----------|-------|---------|------------|
| 43049 | TOF; CID | 43.85 | 1858.88 | CNS1       |

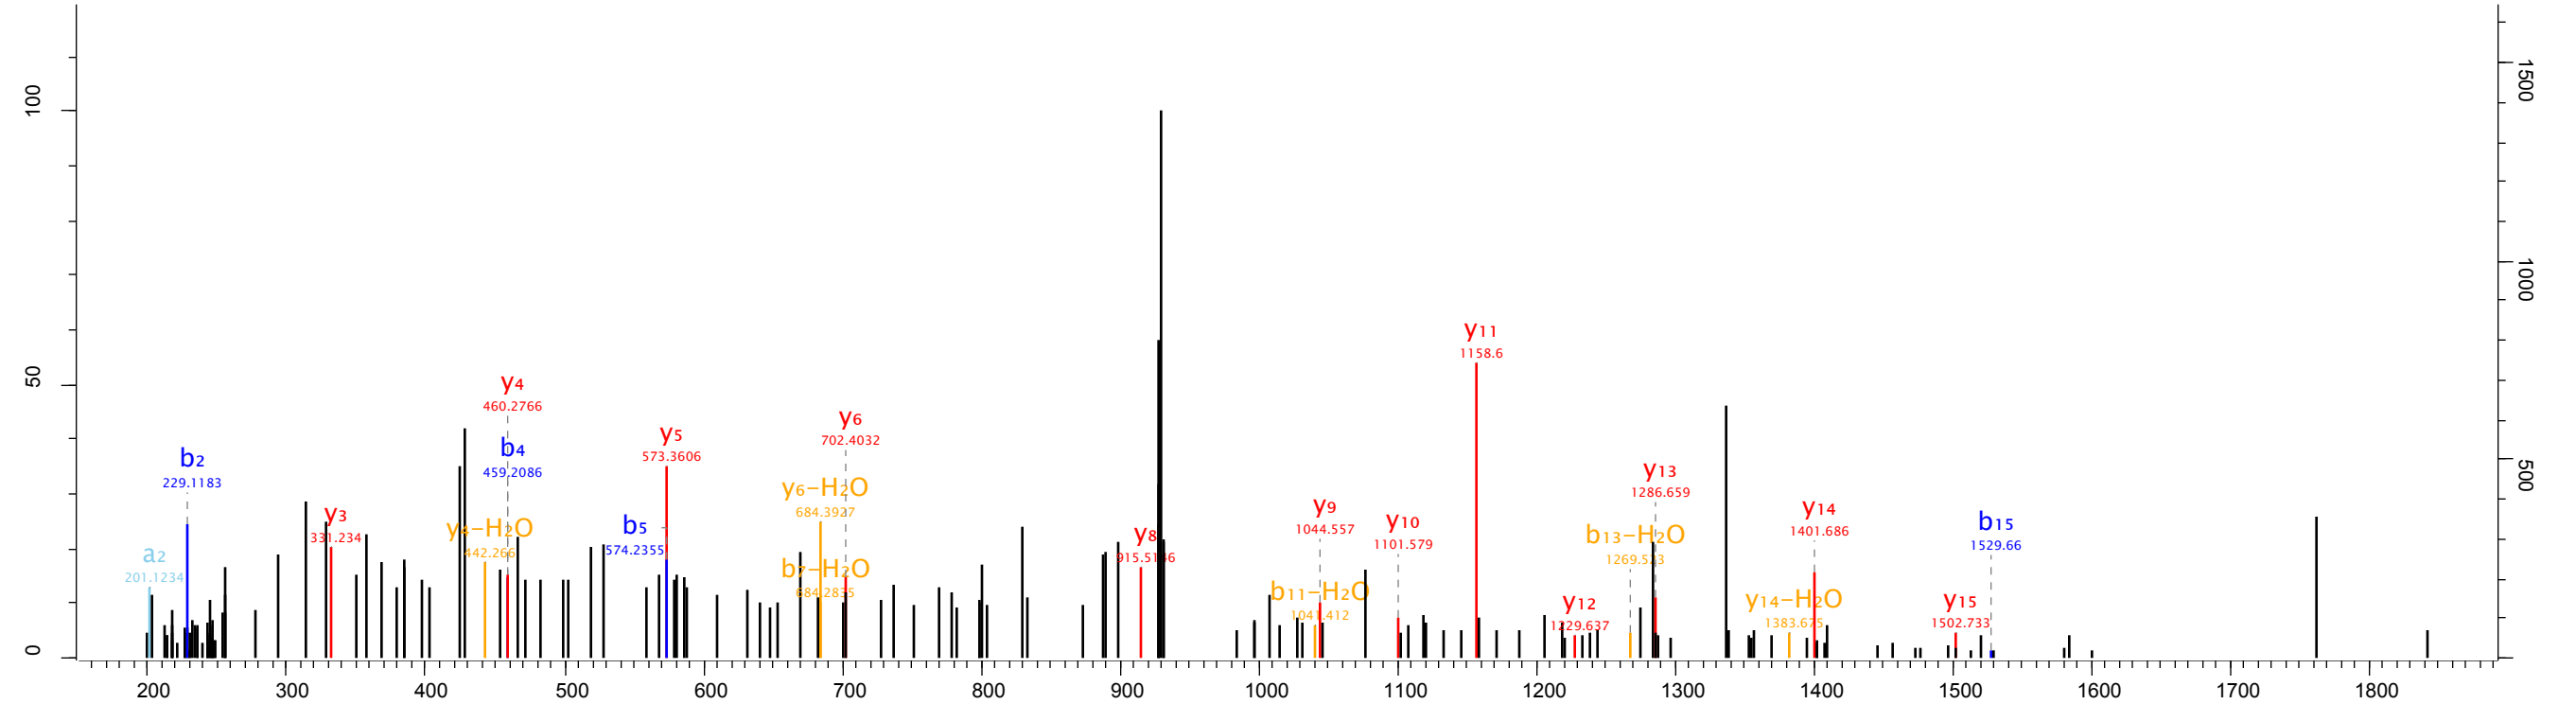

Raw file  
UPS1+500ngY\_90minTop17\_BC4\_01\_358

| Scan  | Method   | Score | Mass    | Gene names |
|-------|----------|-------|---------|------------|
| 43452 | TOF; CID | 56.08 | 2085.89 | MGM101     |

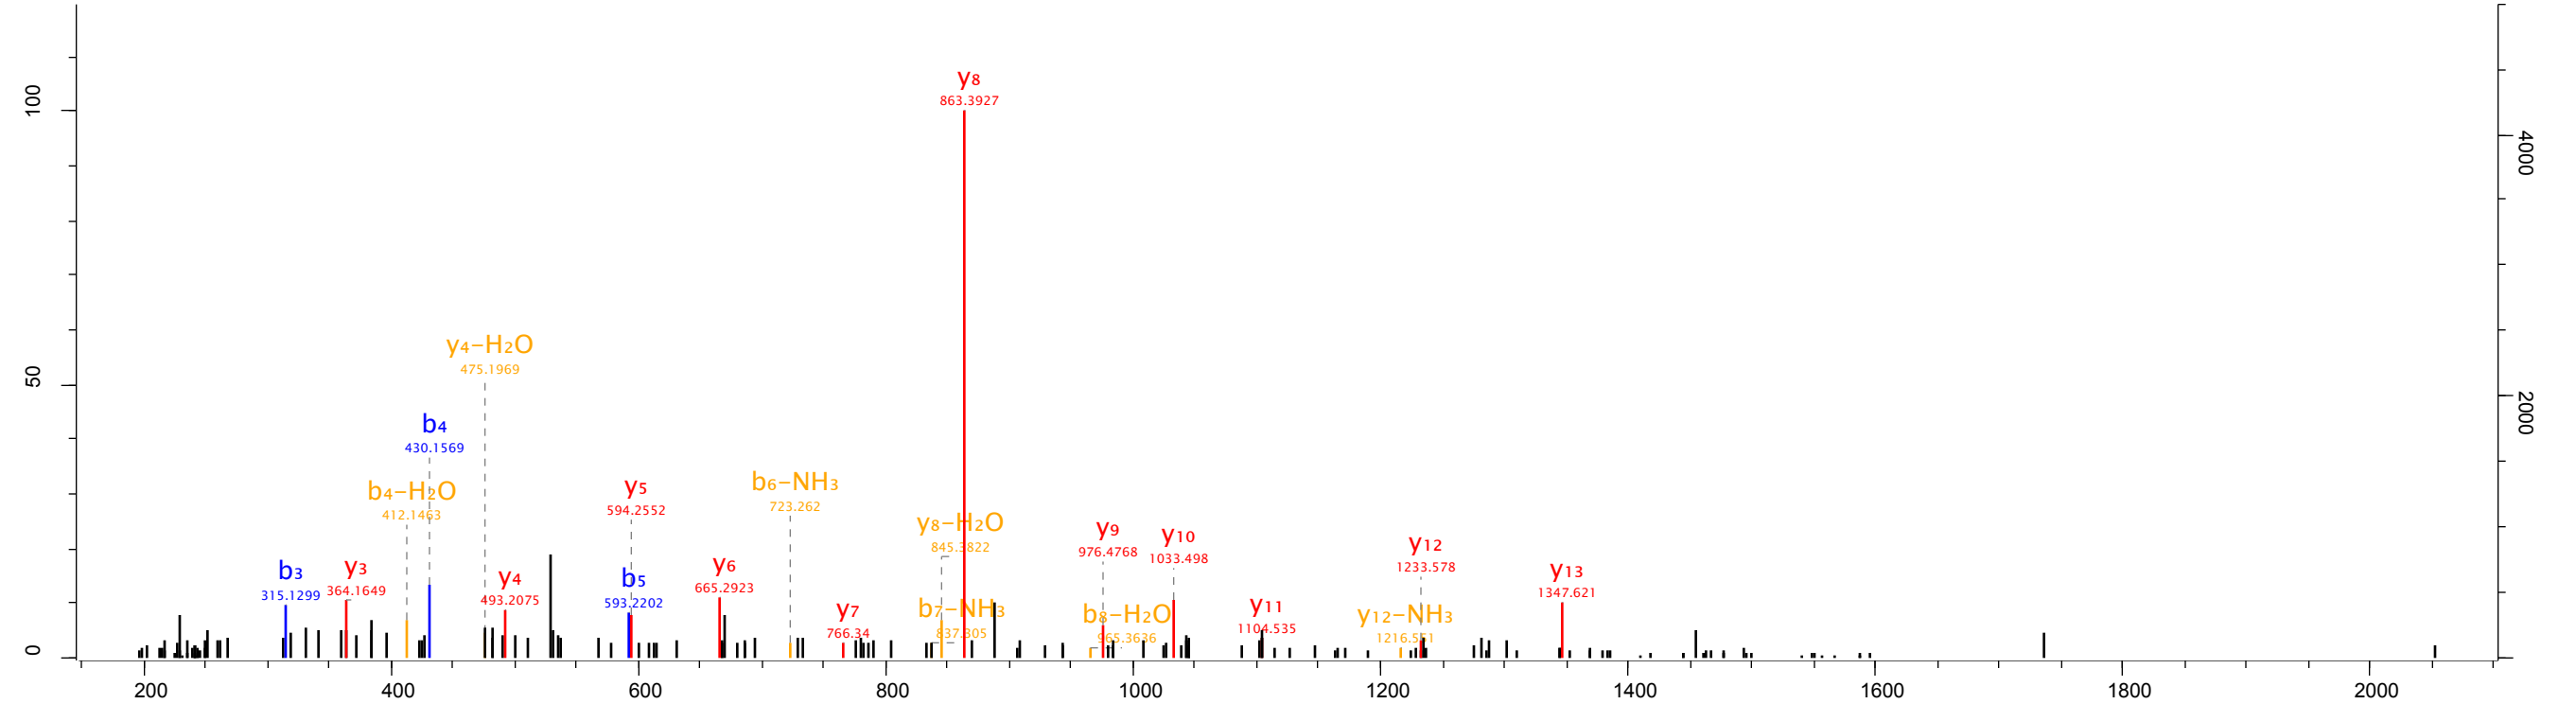

Raw file  
UPS1+500ngY\_90minTop17\_BC4\_01\_358

| Scan  | Method   | Score | Mass    | Gene names |
|-------|----------|-------|---------|------------|
| 43576 | TOF; CID | 45.92 | 2224.94 | RER1       |

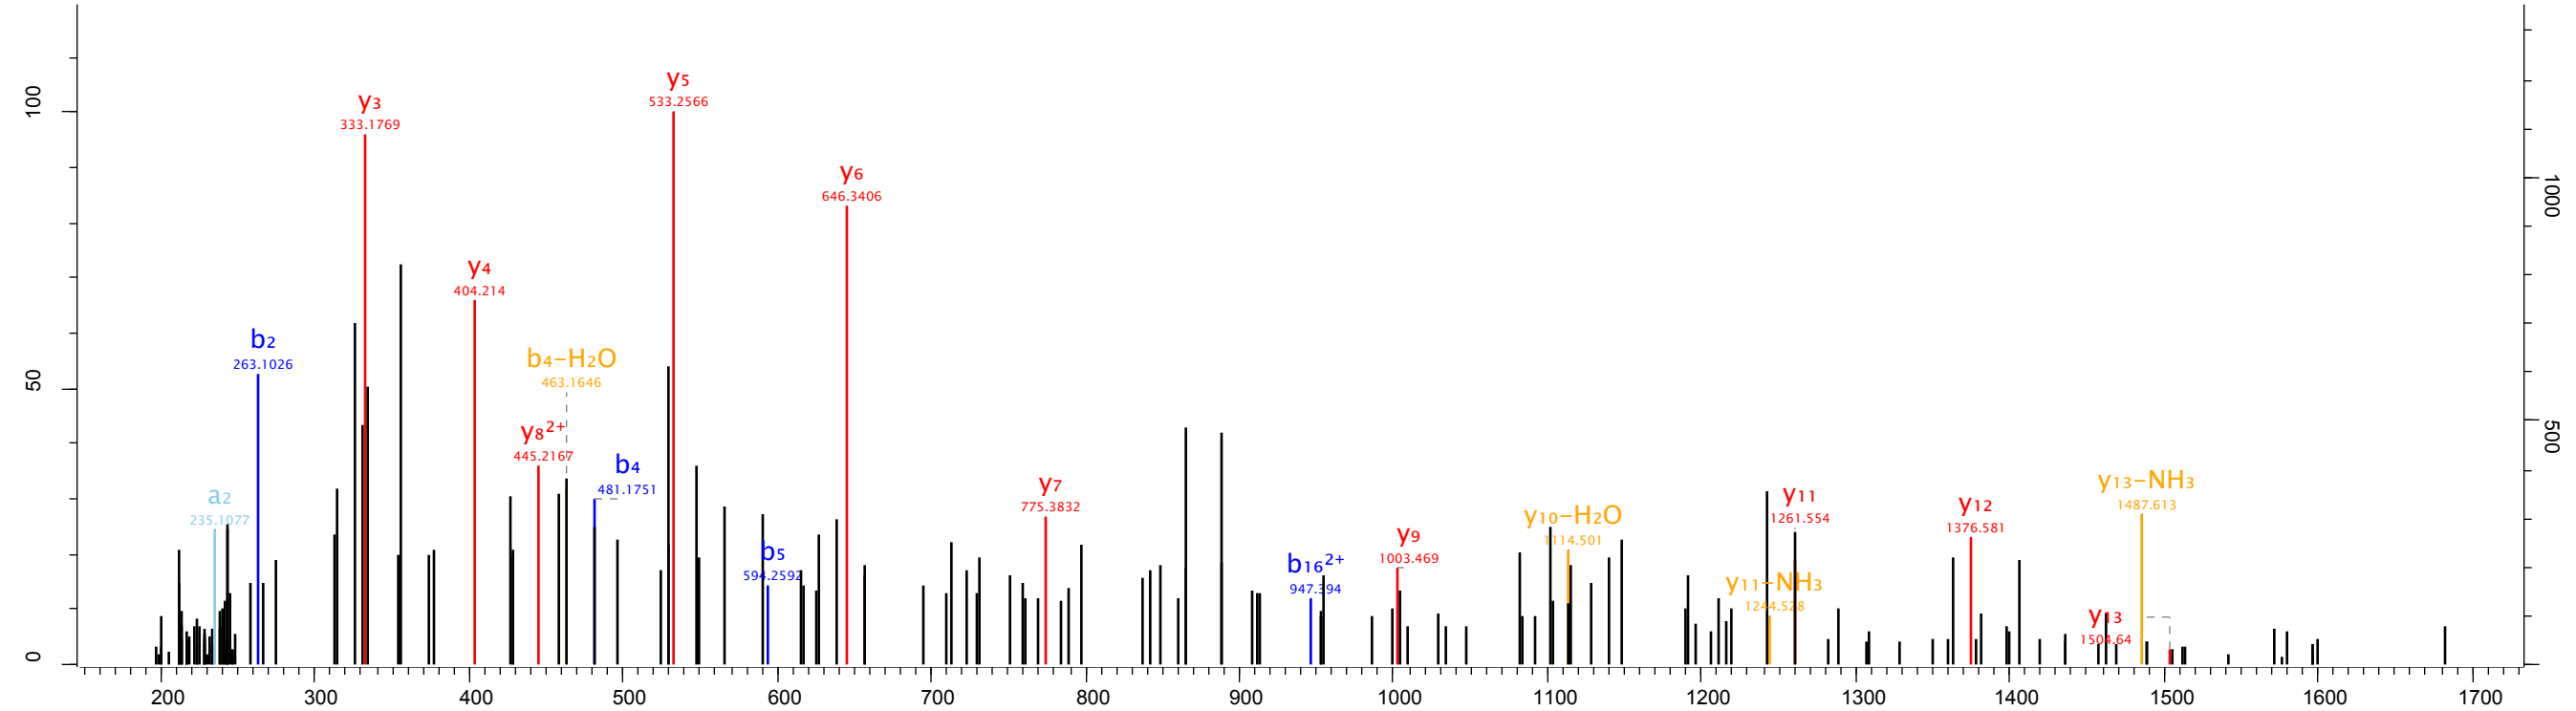

Raw file

UPS1+500ngY\_90minTop17\_BC4\_01\_358

| Scan  | Method   | Score | Mass    | Gene names |
|-------|----------|-------|---------|------------|
| 44204 | TOF; CID | 57.15 | 1691.78 | VT11       |

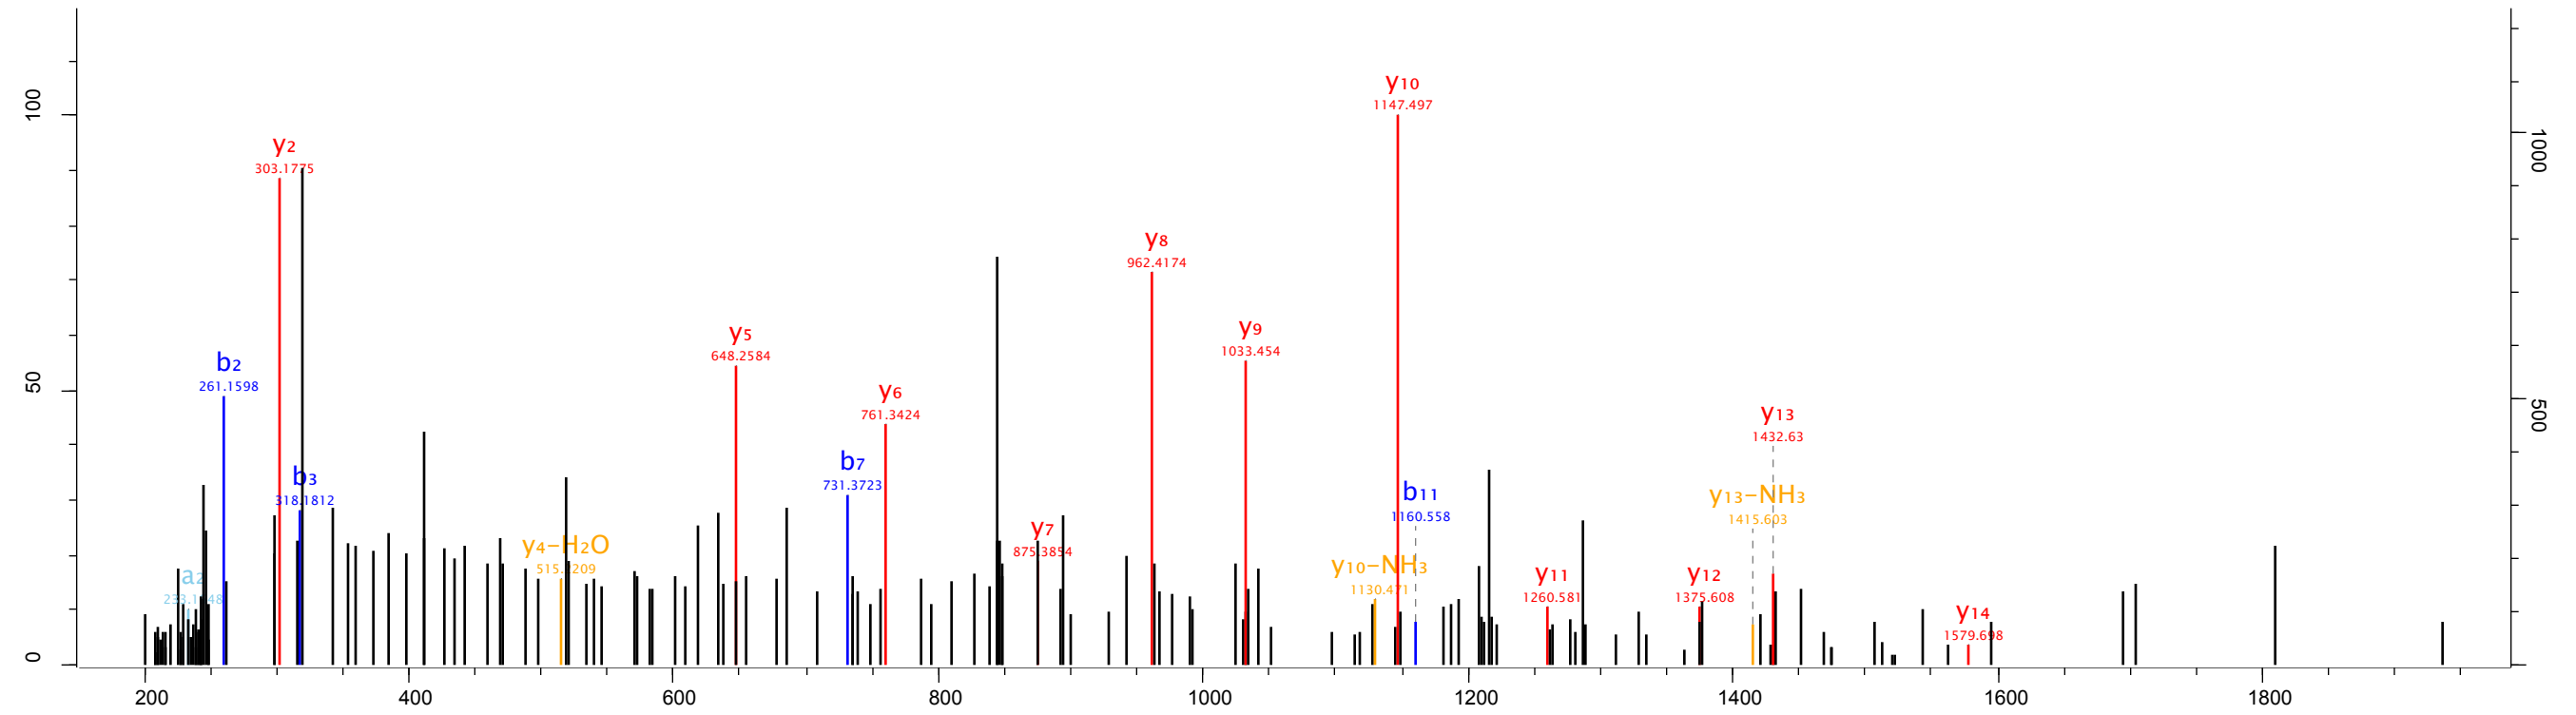

Raw file: UPS1+500ngY\_90minTop17\_BC4\_01\_358  
 Scan: 44570 Method: TOF; CID Score: 118.73 Mass: 1545.73 Gene names: TMA7

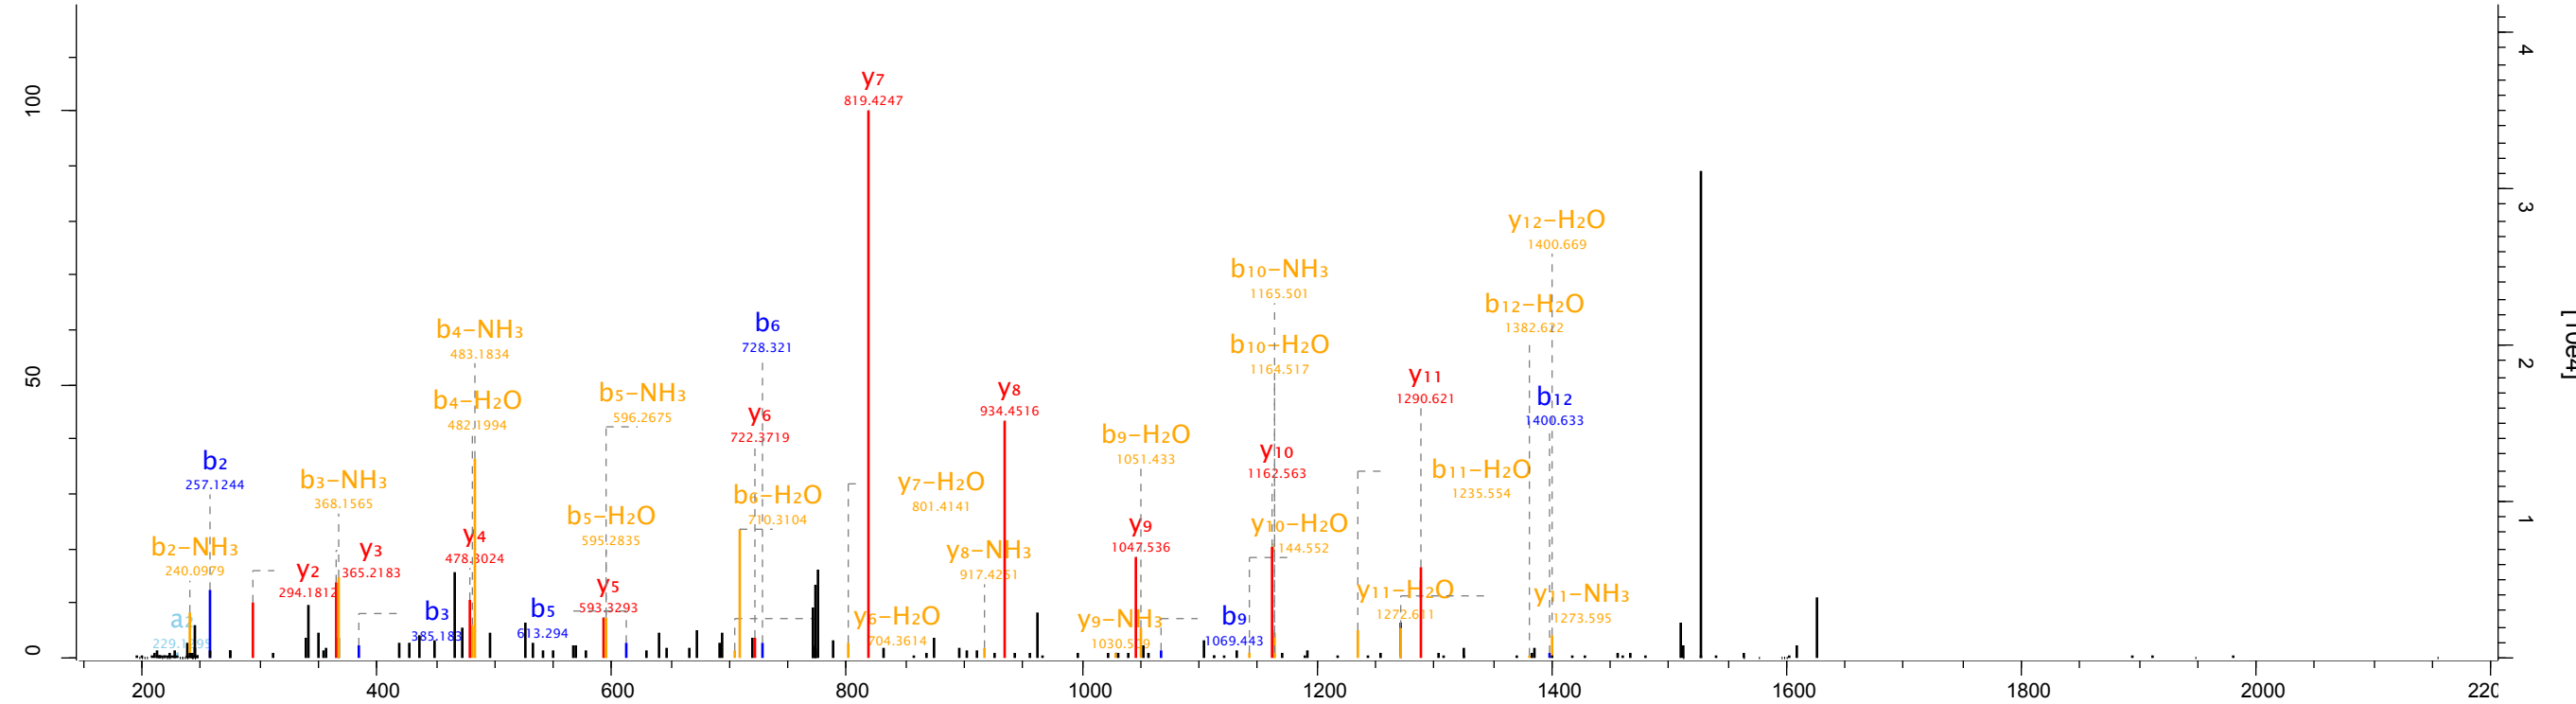

Raw file  
UPS1+500ngY\_90minTop17\_BC4\_01\_358

| Scan  | Method   | Score | Mass   | Gene names |
|-------|----------|-------|--------|------------|
| 44603 | TOF; CID | 78.34 | 1298.6 | PPT1       |

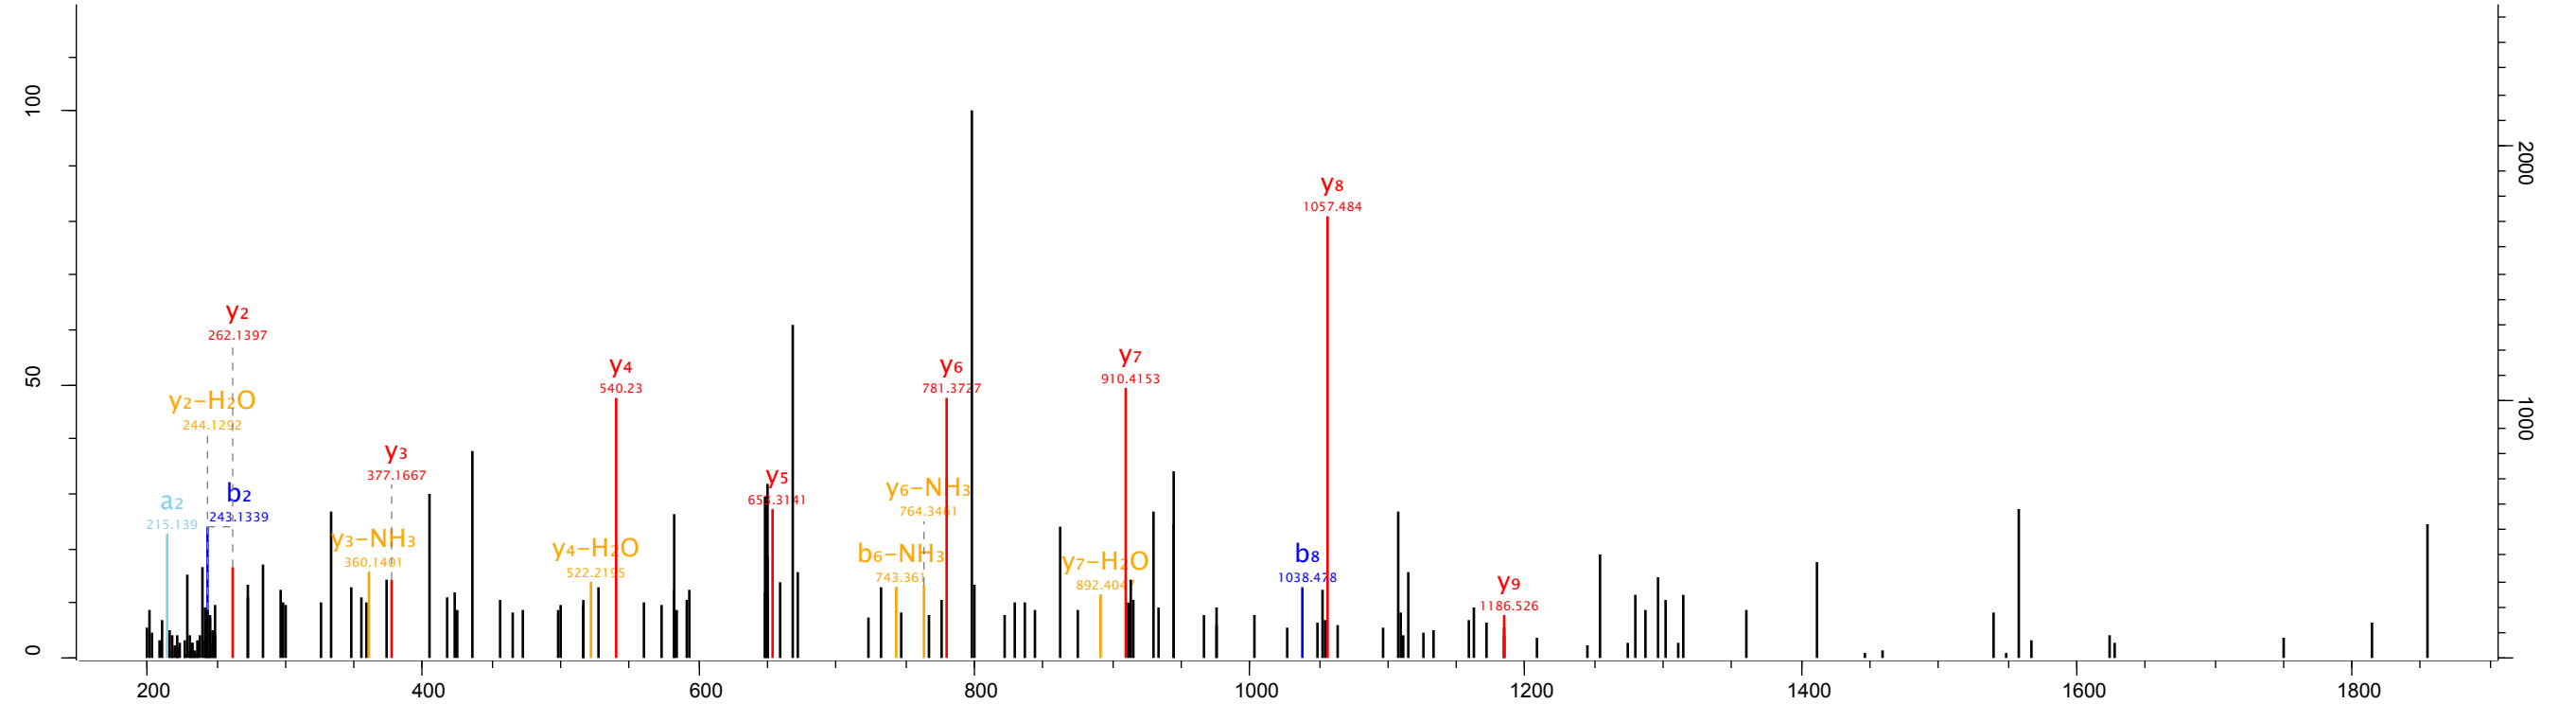

Raw file  
UPS1+500ngY\_90minTop17\_BC4\_01\_358

| Scan  | Method   | Score | Mass    | Gene names |
|-------|----------|-------|---------|------------|
| 44808 | TOF; CID | 63.09 | 1365.71 | AGE2       |

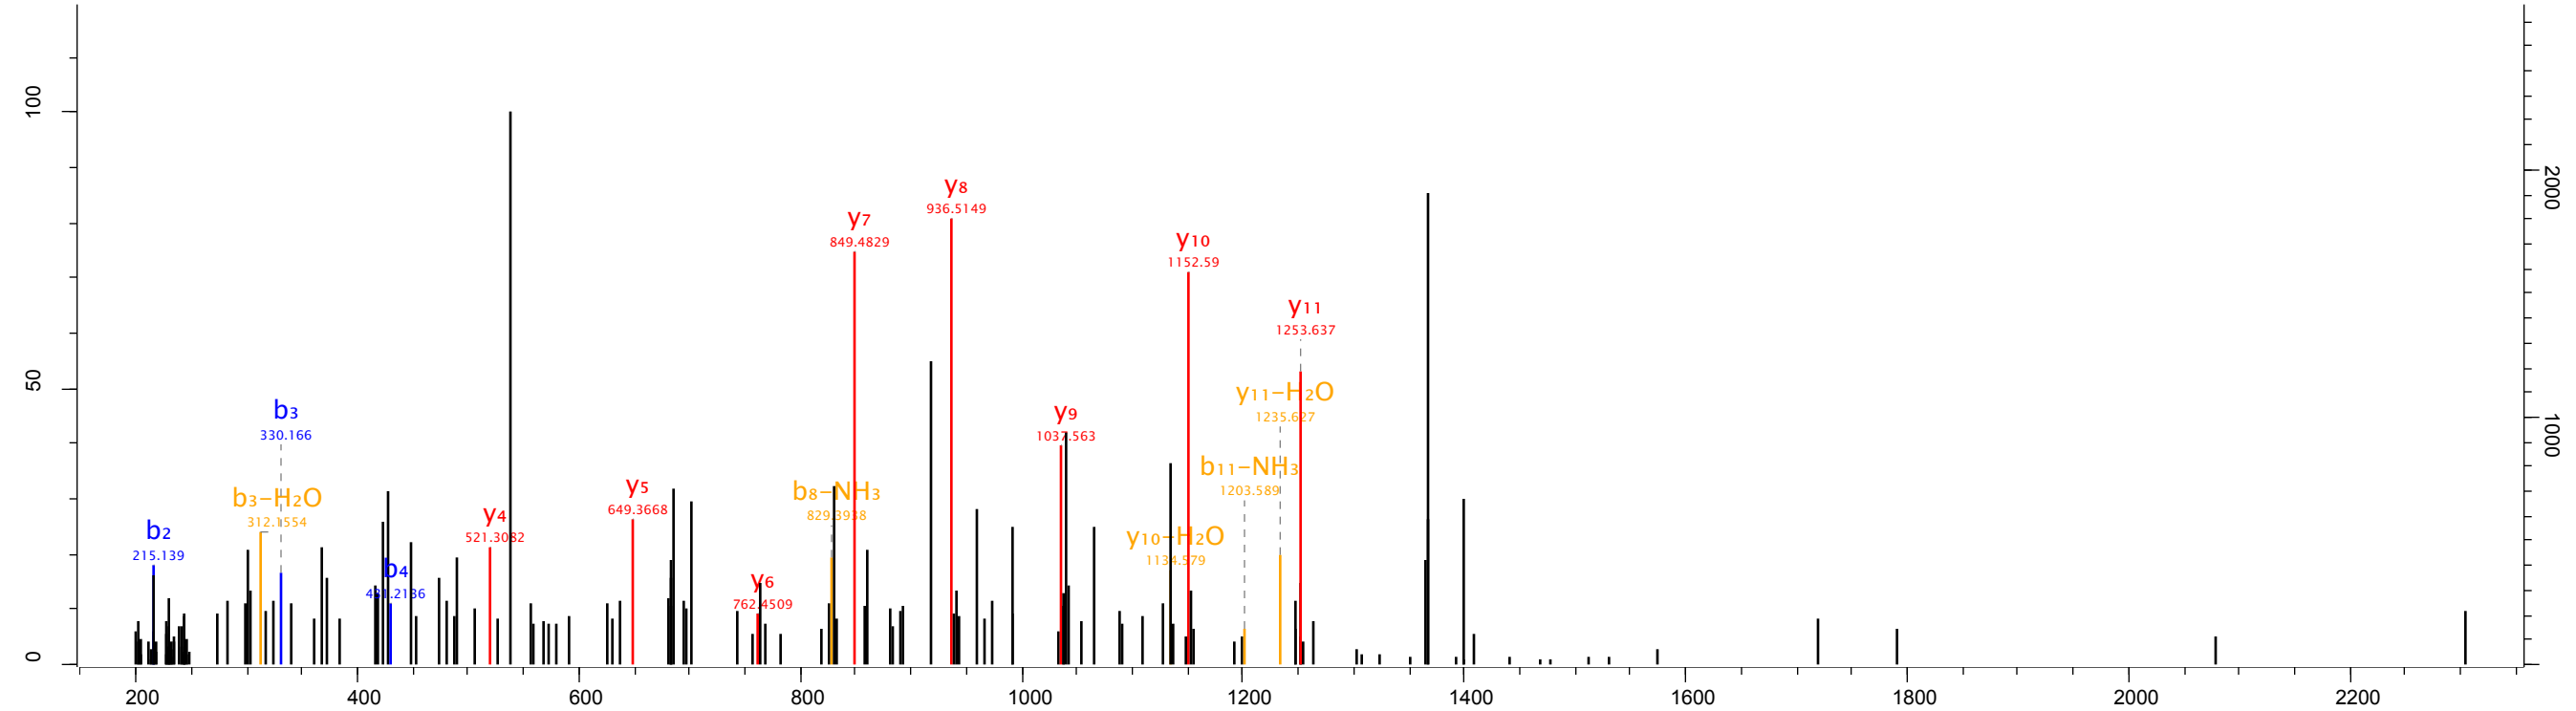



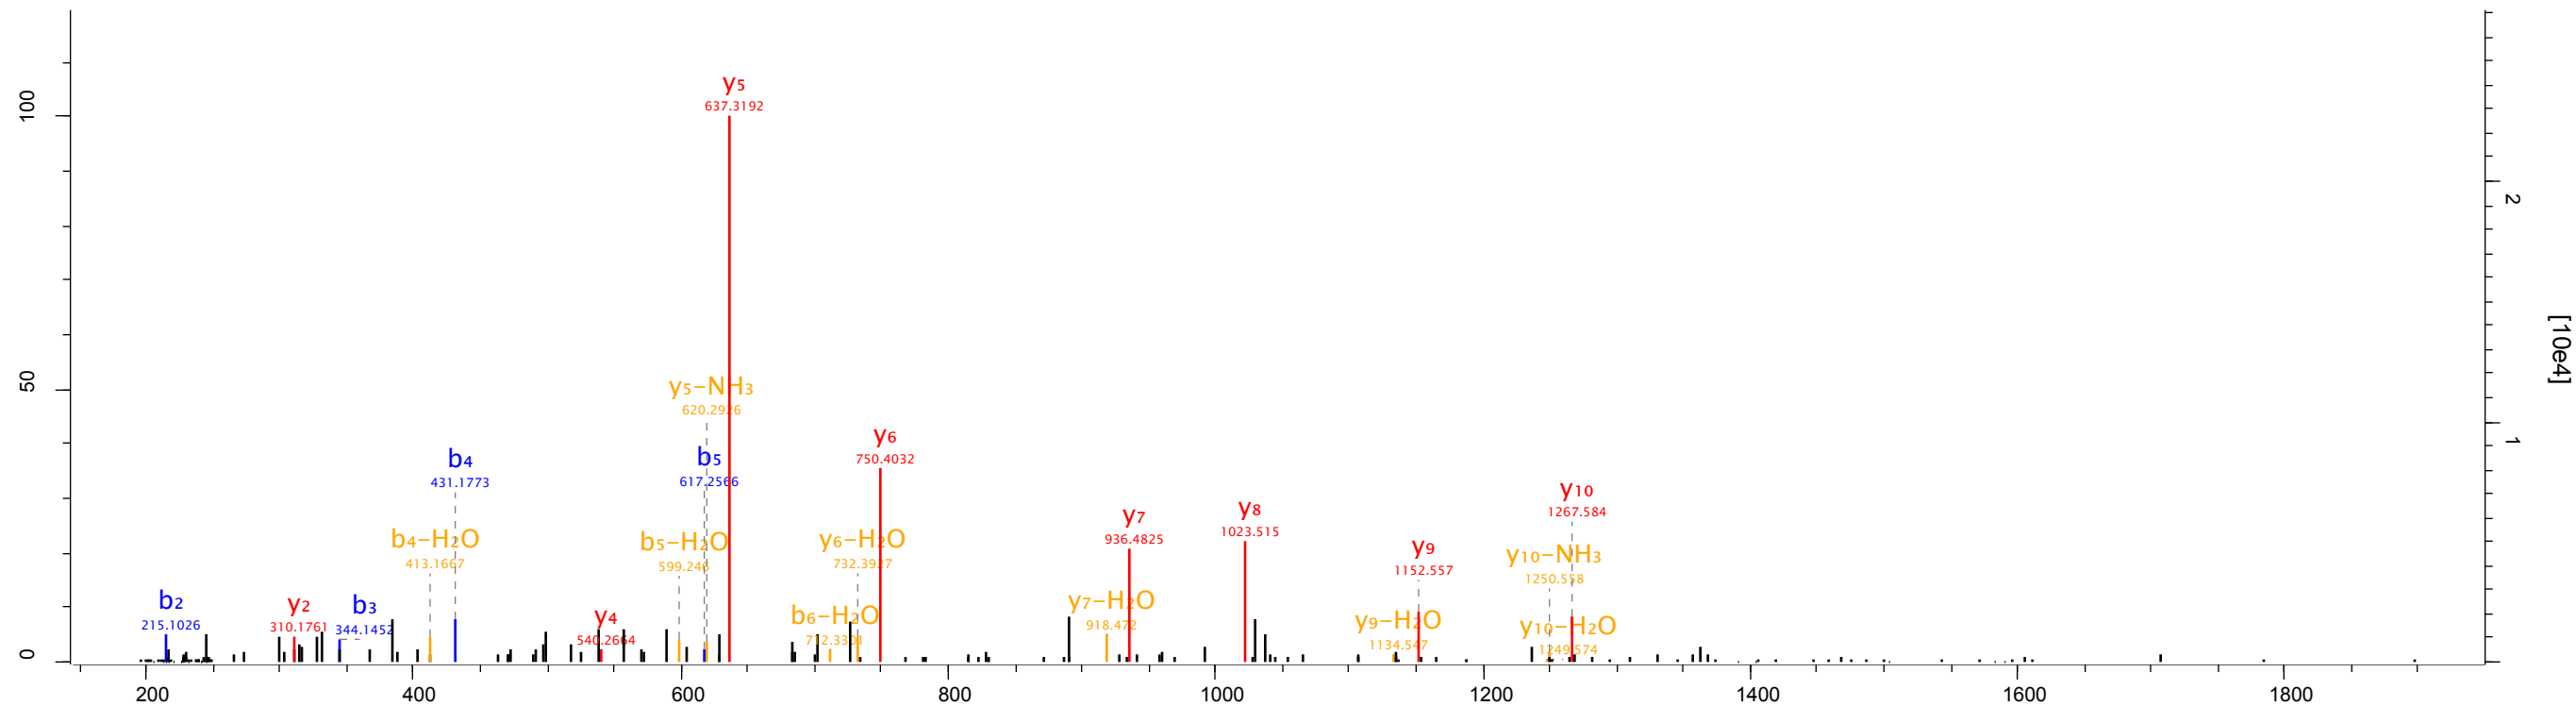

Raw file

UPS1+500ngY\_90minTop17\_BC4\_01\_358

| Scan  | Method   | Score | Mass    | Gene names |
|-------|----------|-------|---------|------------|
| 45184 | TOF; CID | 61.53 | 1656.75 | CKB2       |

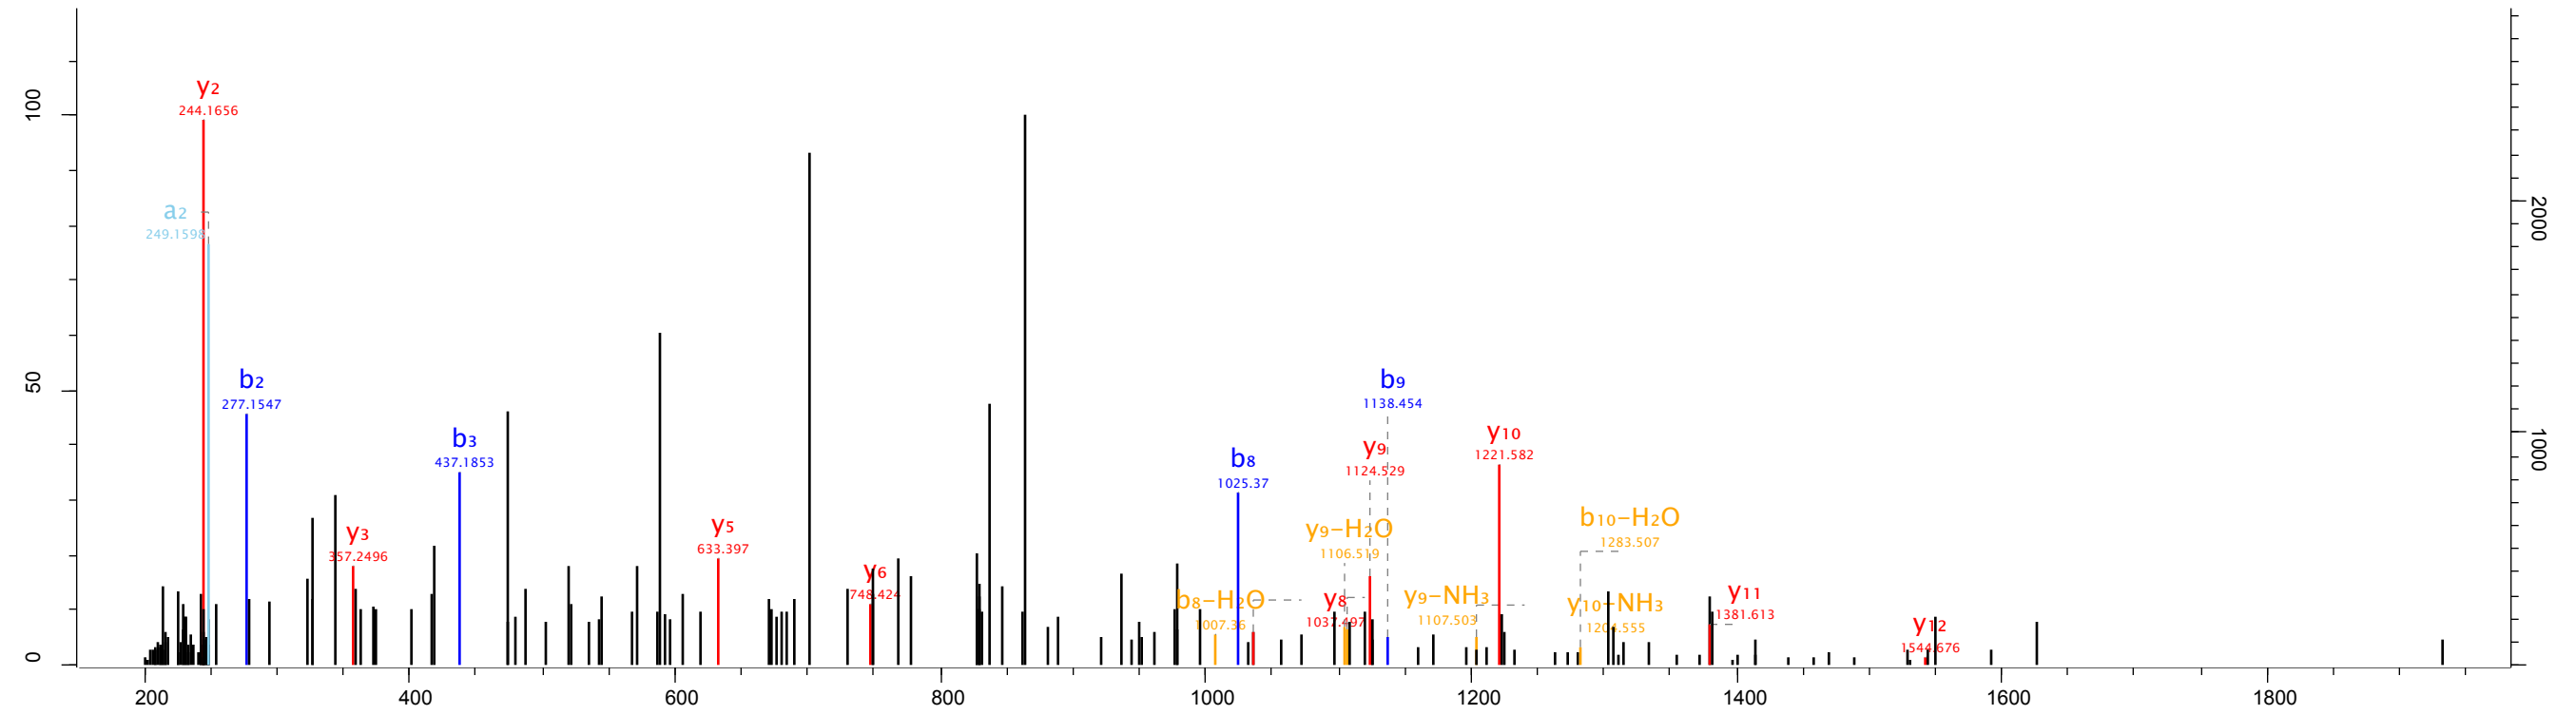

Raw file

UPS1+500ngY\_90minTop17\_BC4\_01\_358

Scan  
45881Method  
TOF; CIDScore  
54.76Mass  
1937.94Gene names  
YJU3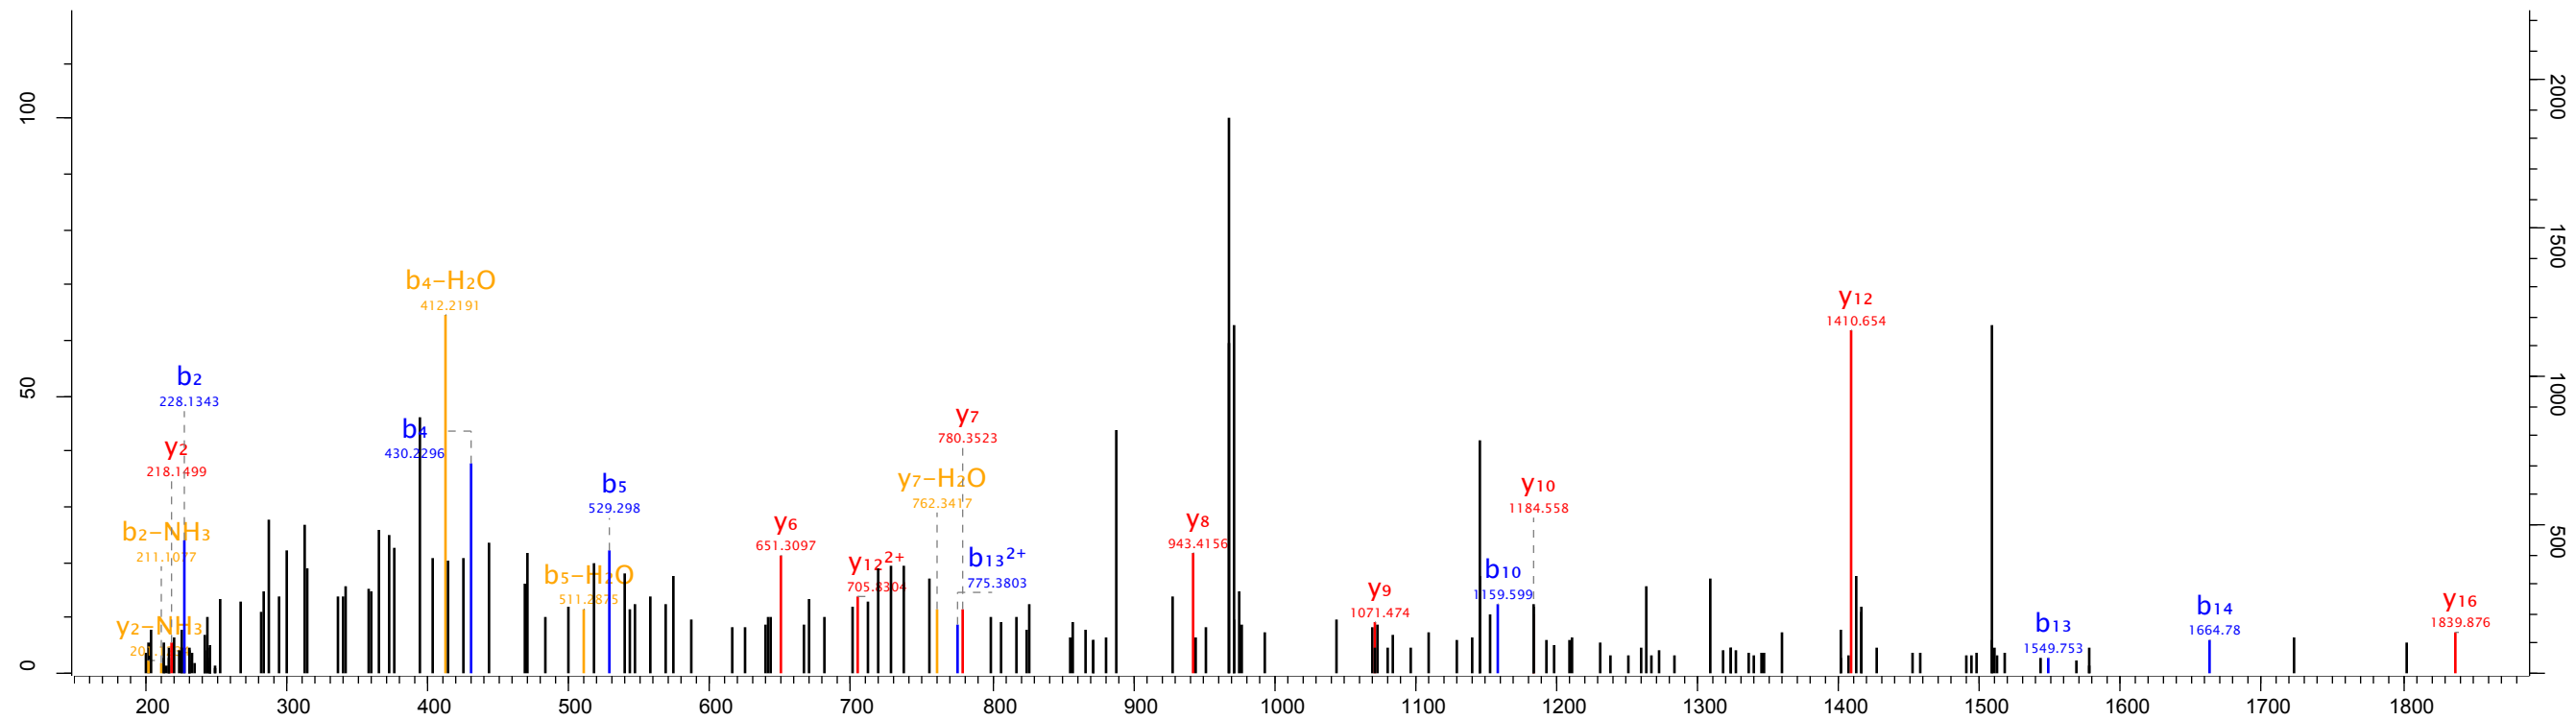

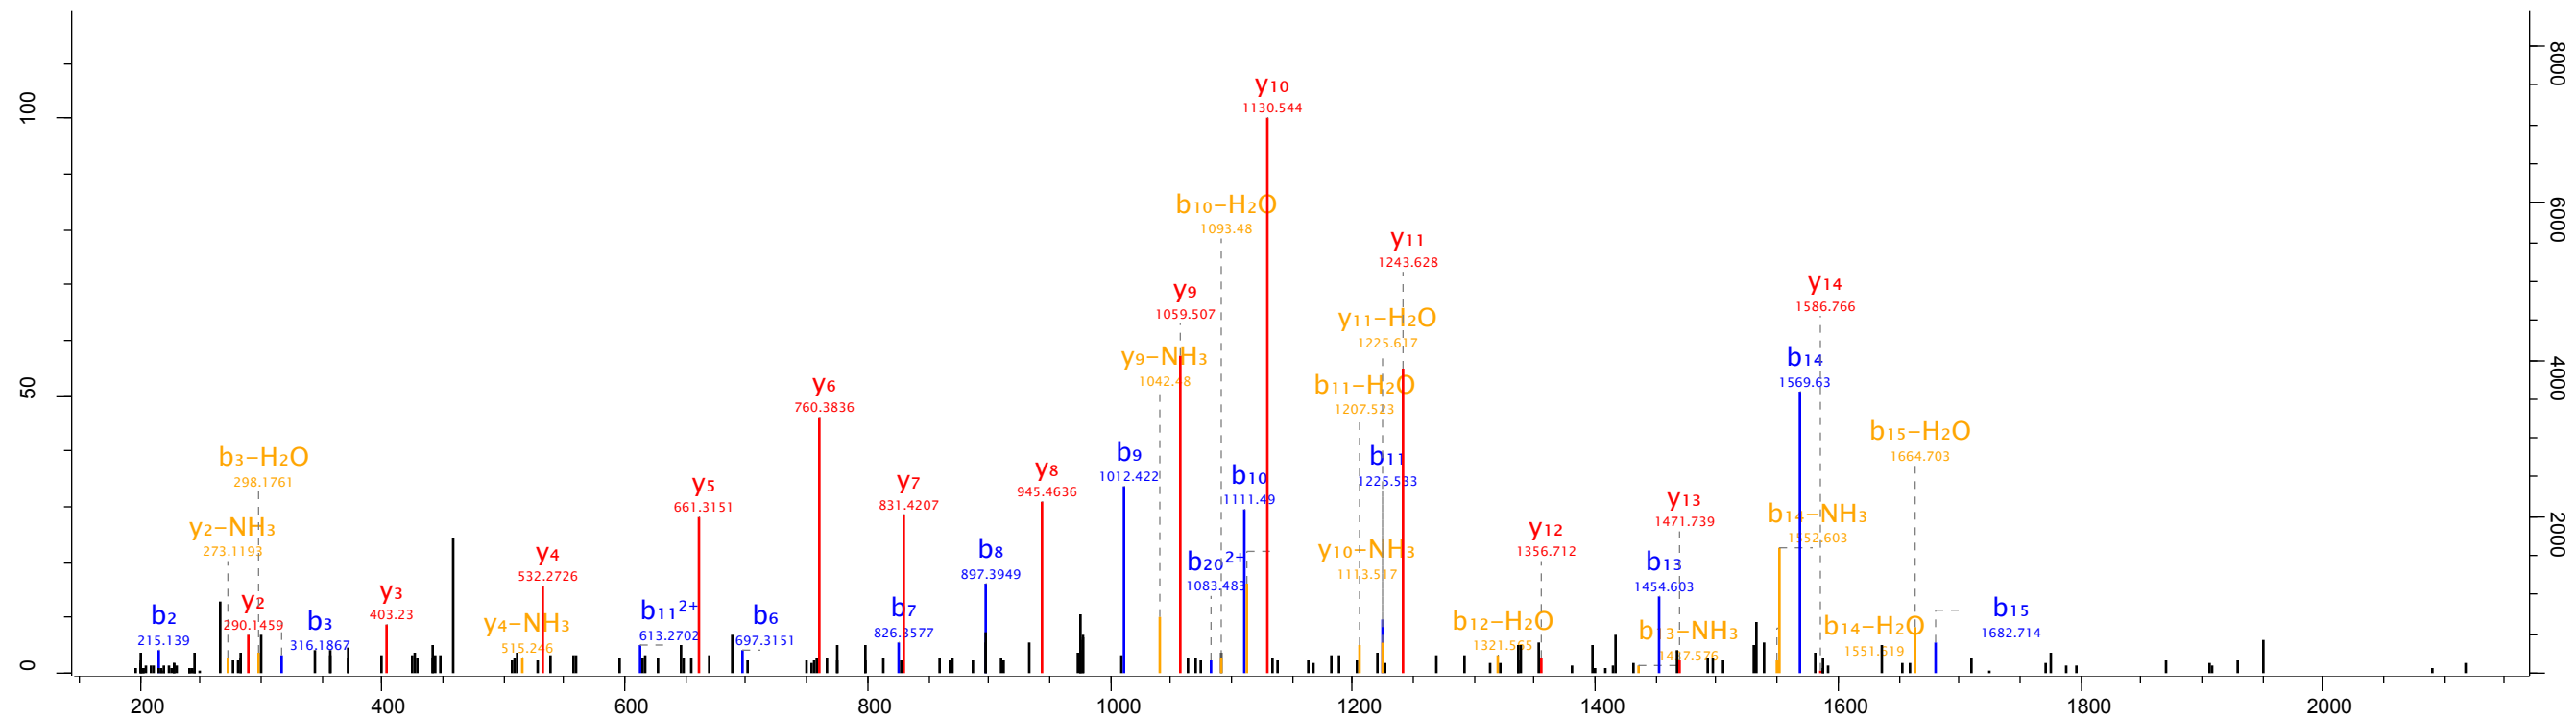

Raw file  
UPS1+500ngY\_90minTop17\_BC4\_01\_358

| Scan  | Method   | Score | Mass    | Gene names |
|-------|----------|-------|---------|------------|
| 46575 | TOF; CID | 65.25 | 1034.54 | SEC22      |

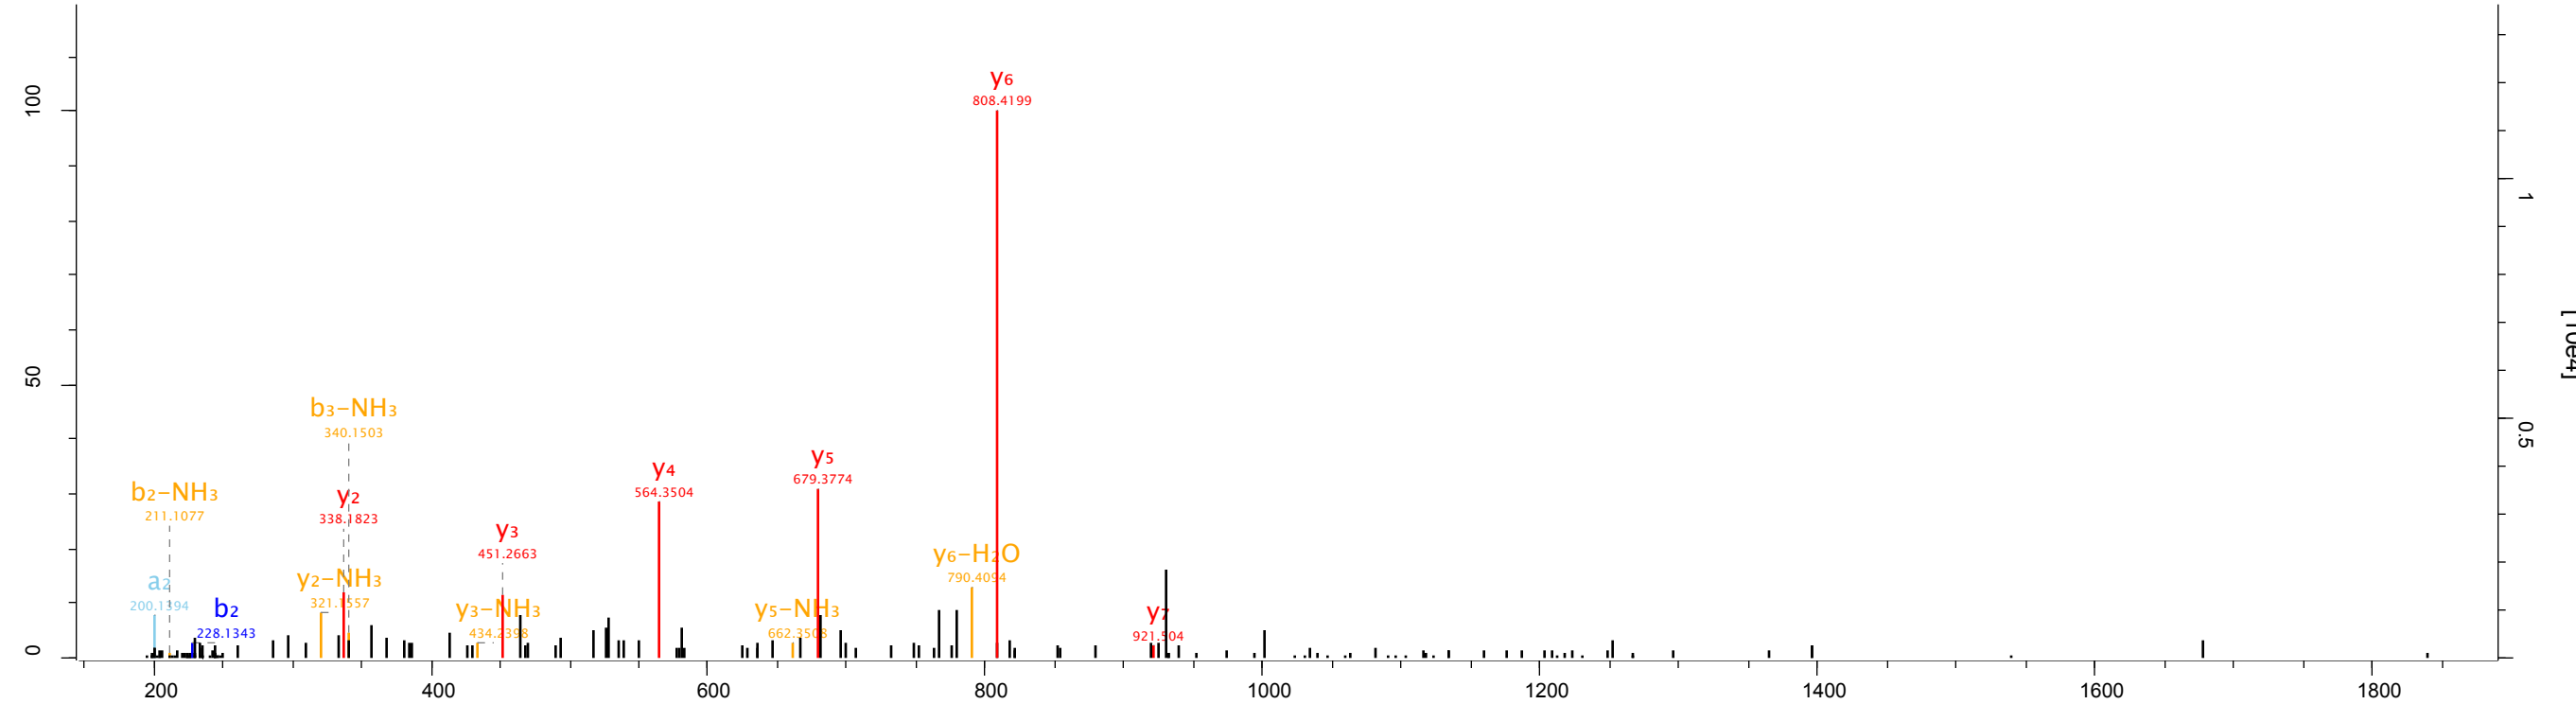

Raw file

UPS1+500ngY\_90minTop17\_BC4\_01\_358

Scan

46619

Method

TOF; CID

Score

47.73

Mass

2130.9

Gene names

CCW14

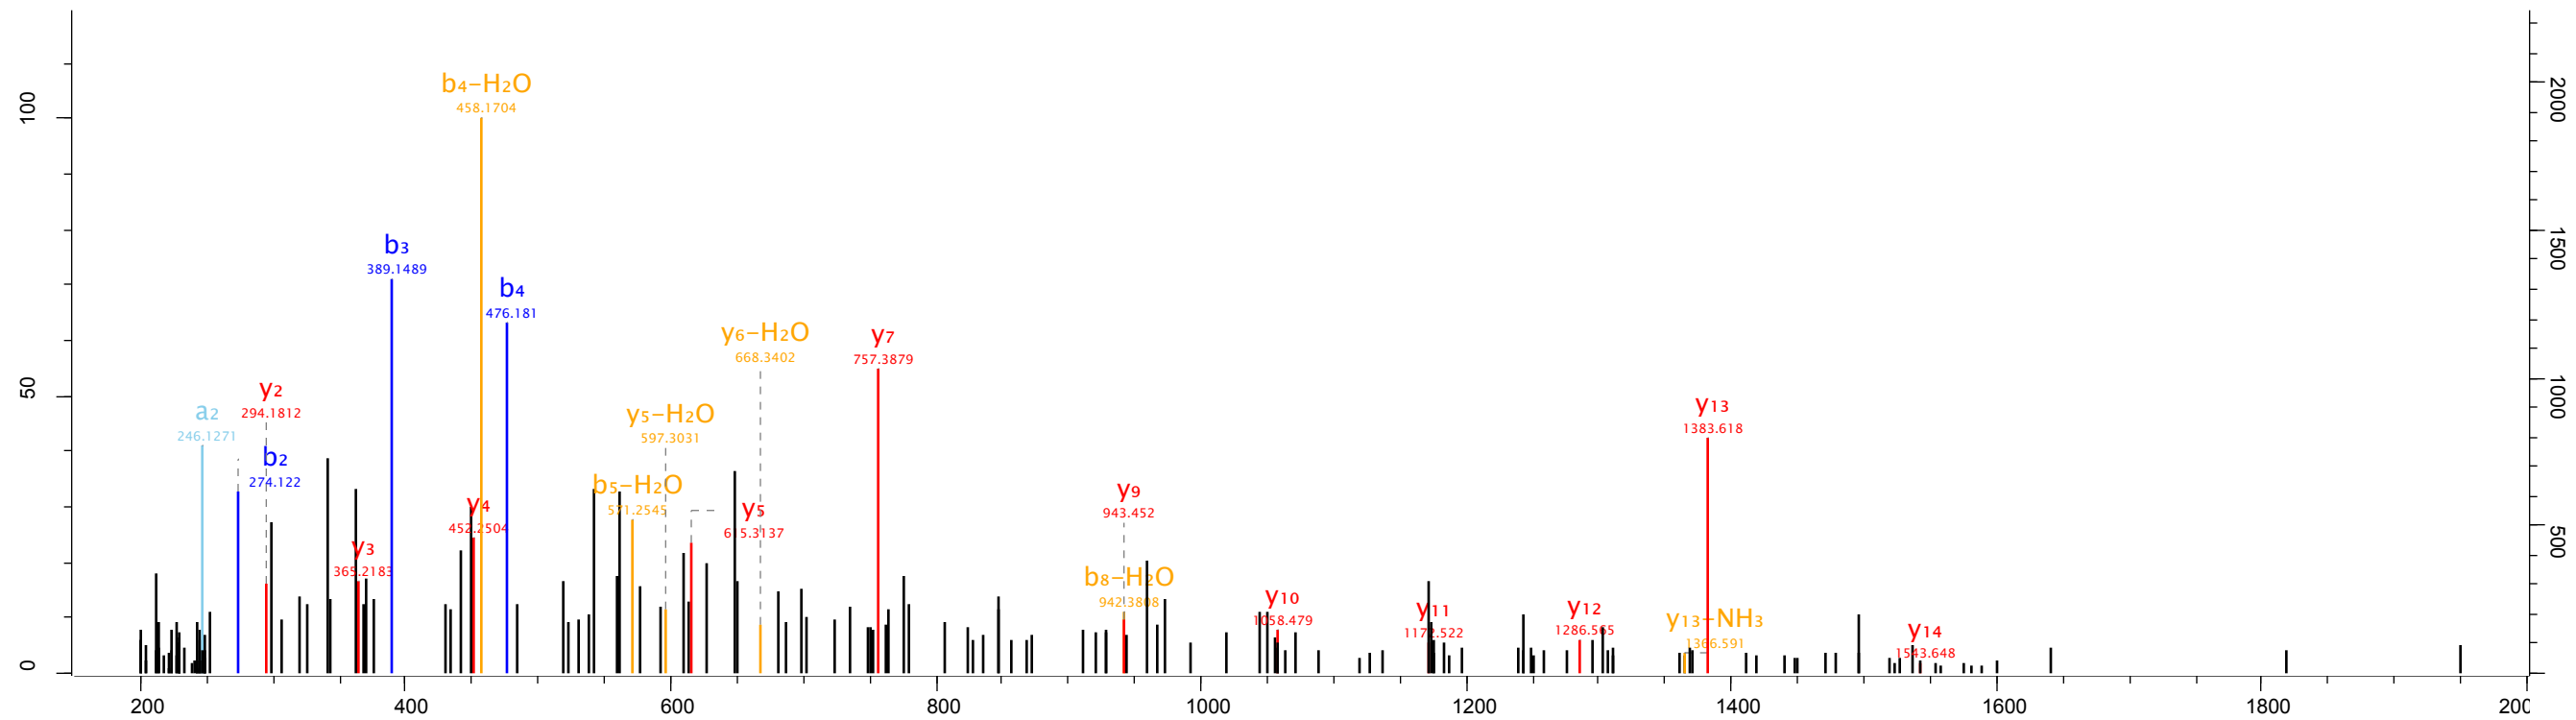

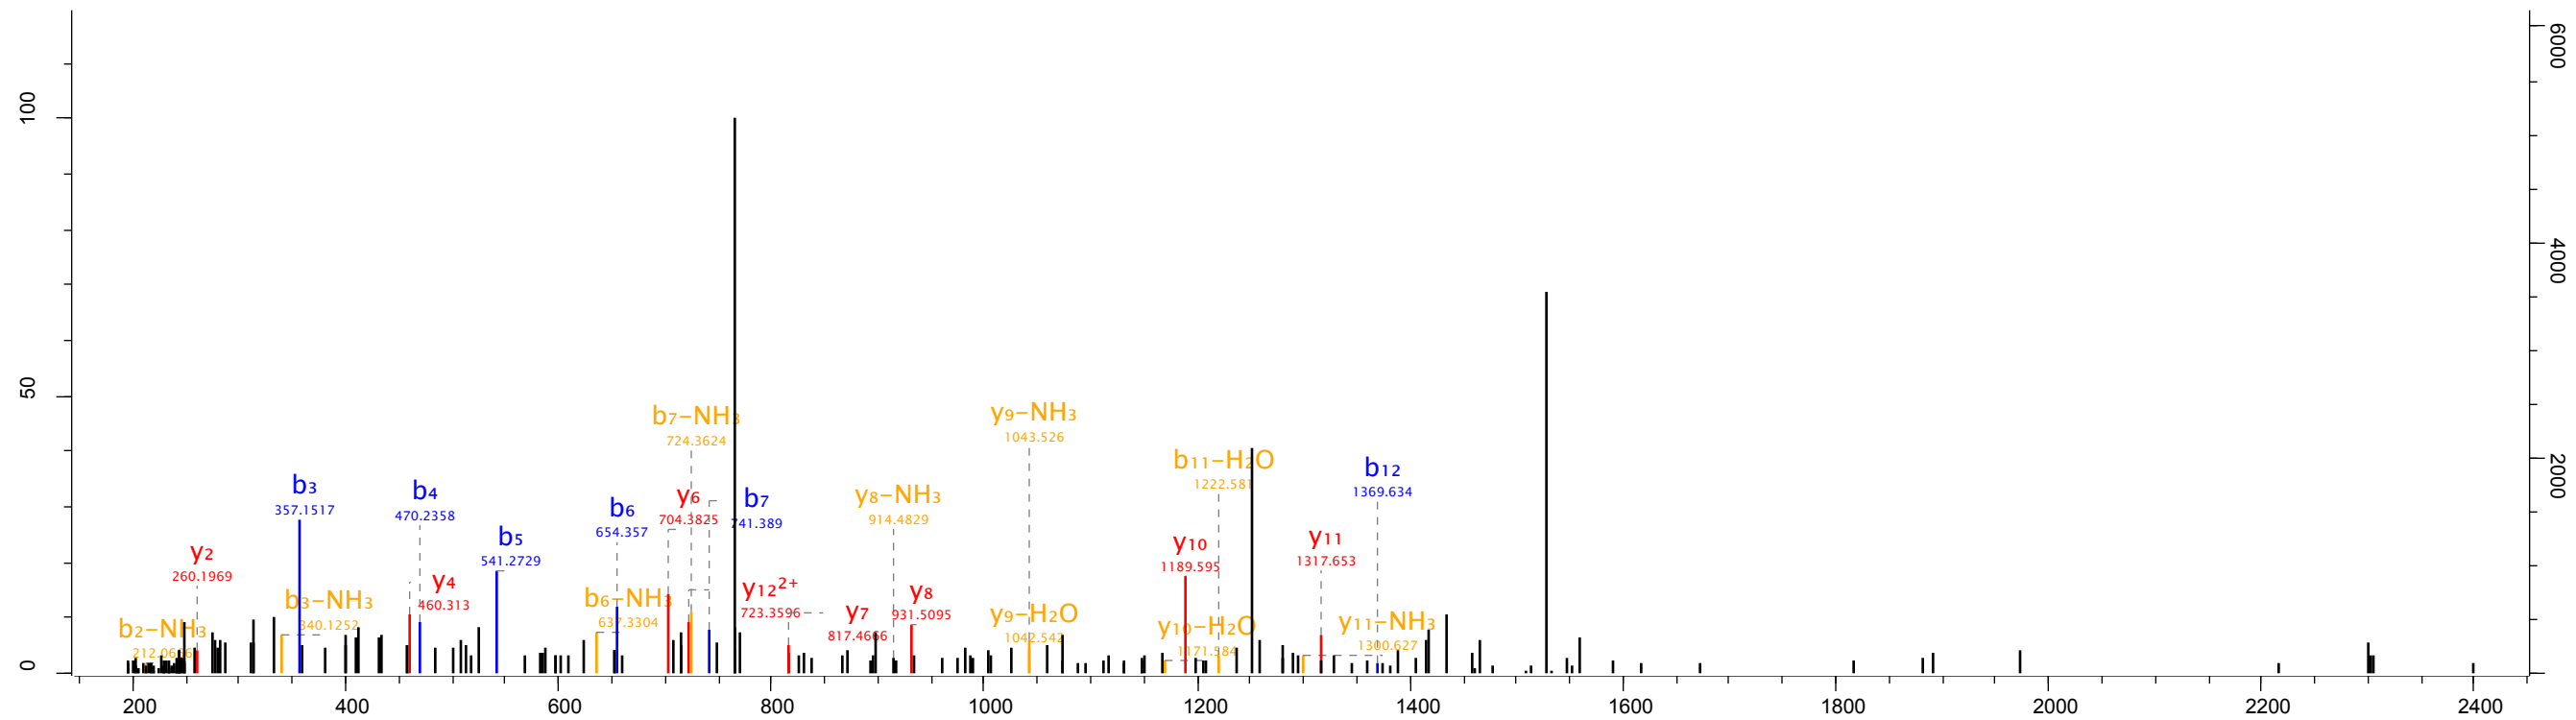

Raw file  
UPS1+500ngY\_90minTop17\_BC4\_01\_358

| Scan  | Method   | Score | Mass    | Gene names |
|-------|----------|-------|---------|------------|
| 46838 | TOF; CID | 74.3  | 1069.53 | DTD1       |

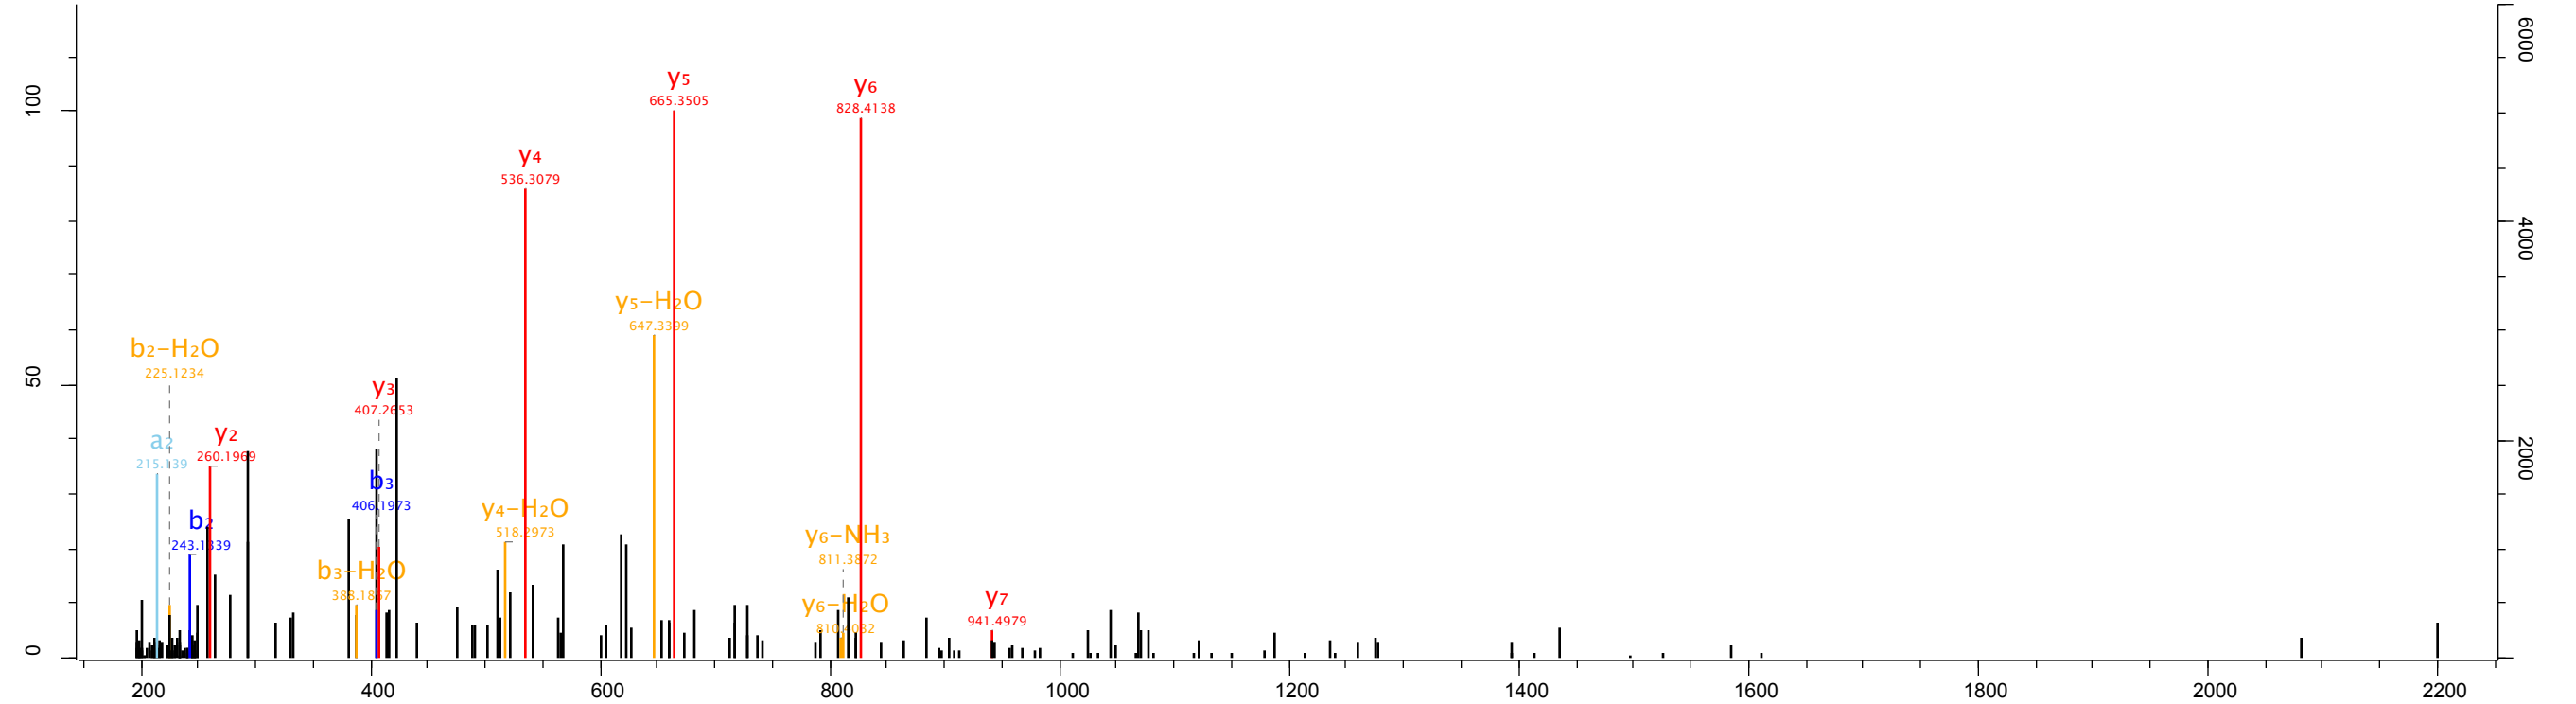



UPS1+500ngY\_90minTop17\_BC4\_01\_358

46891

TOF; CID

50.27

2677.18

FBP26

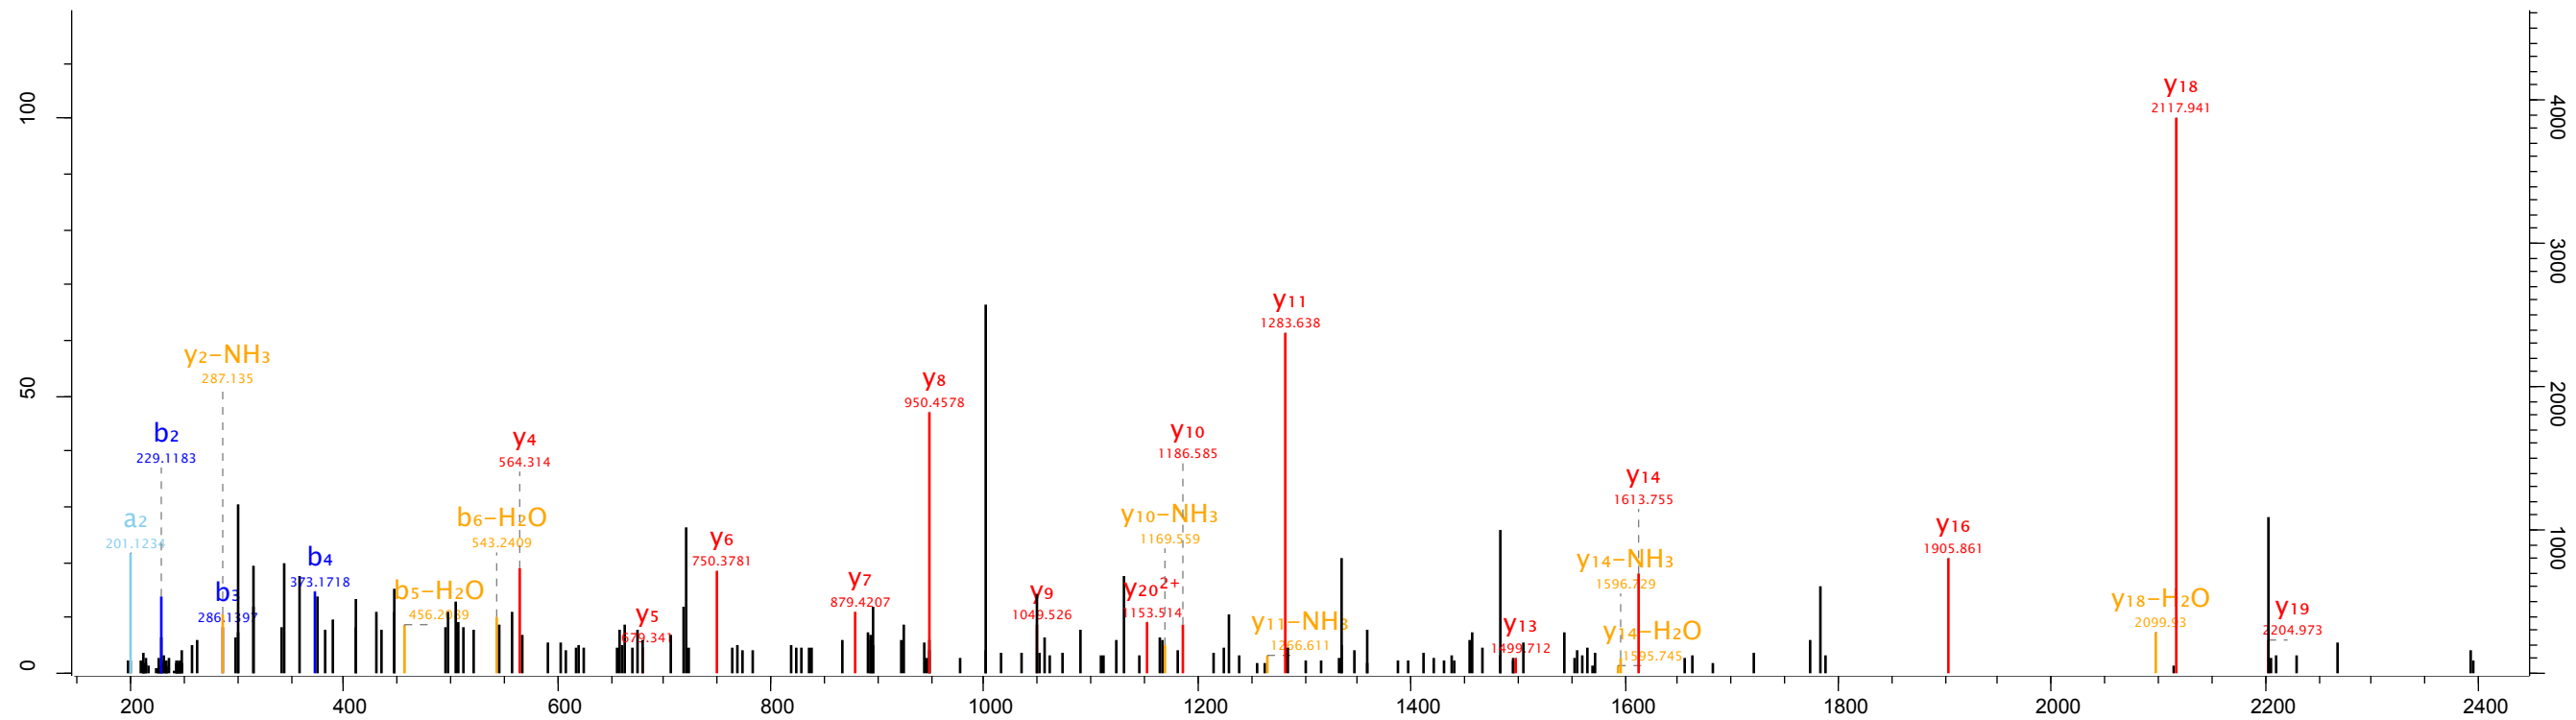

Raw file  
UPS1+500ngY\_90minTop17\_BC4\_01\_358

Scan 47095  
Method TOF; CID  
Score 67.93  
Mass 2100.98

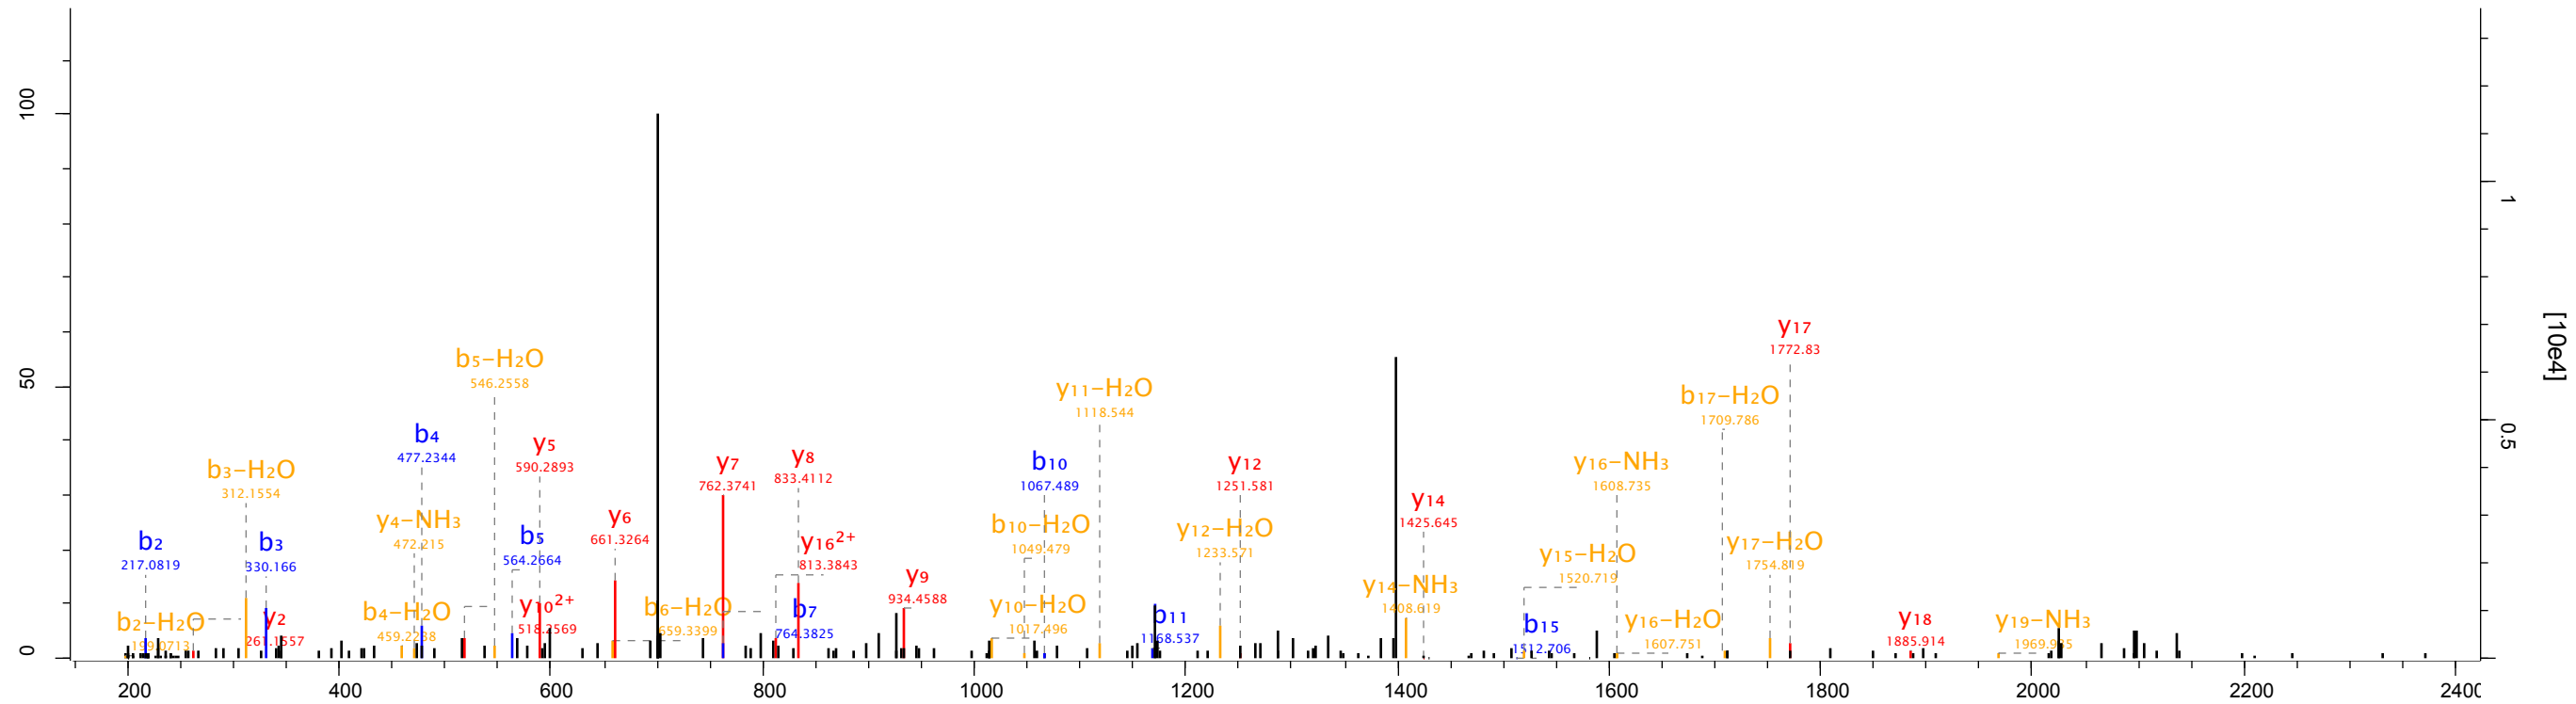

Raw file  
UPS1+500ngY\_90minTop17\_BC4\_01\_358

| Scan  | Method   | Score | Mass    | Gene names |
|-------|----------|-------|---------|------------|
| 47117 | TOF; CID | 46.42 | 1945.01 | SVL3       |

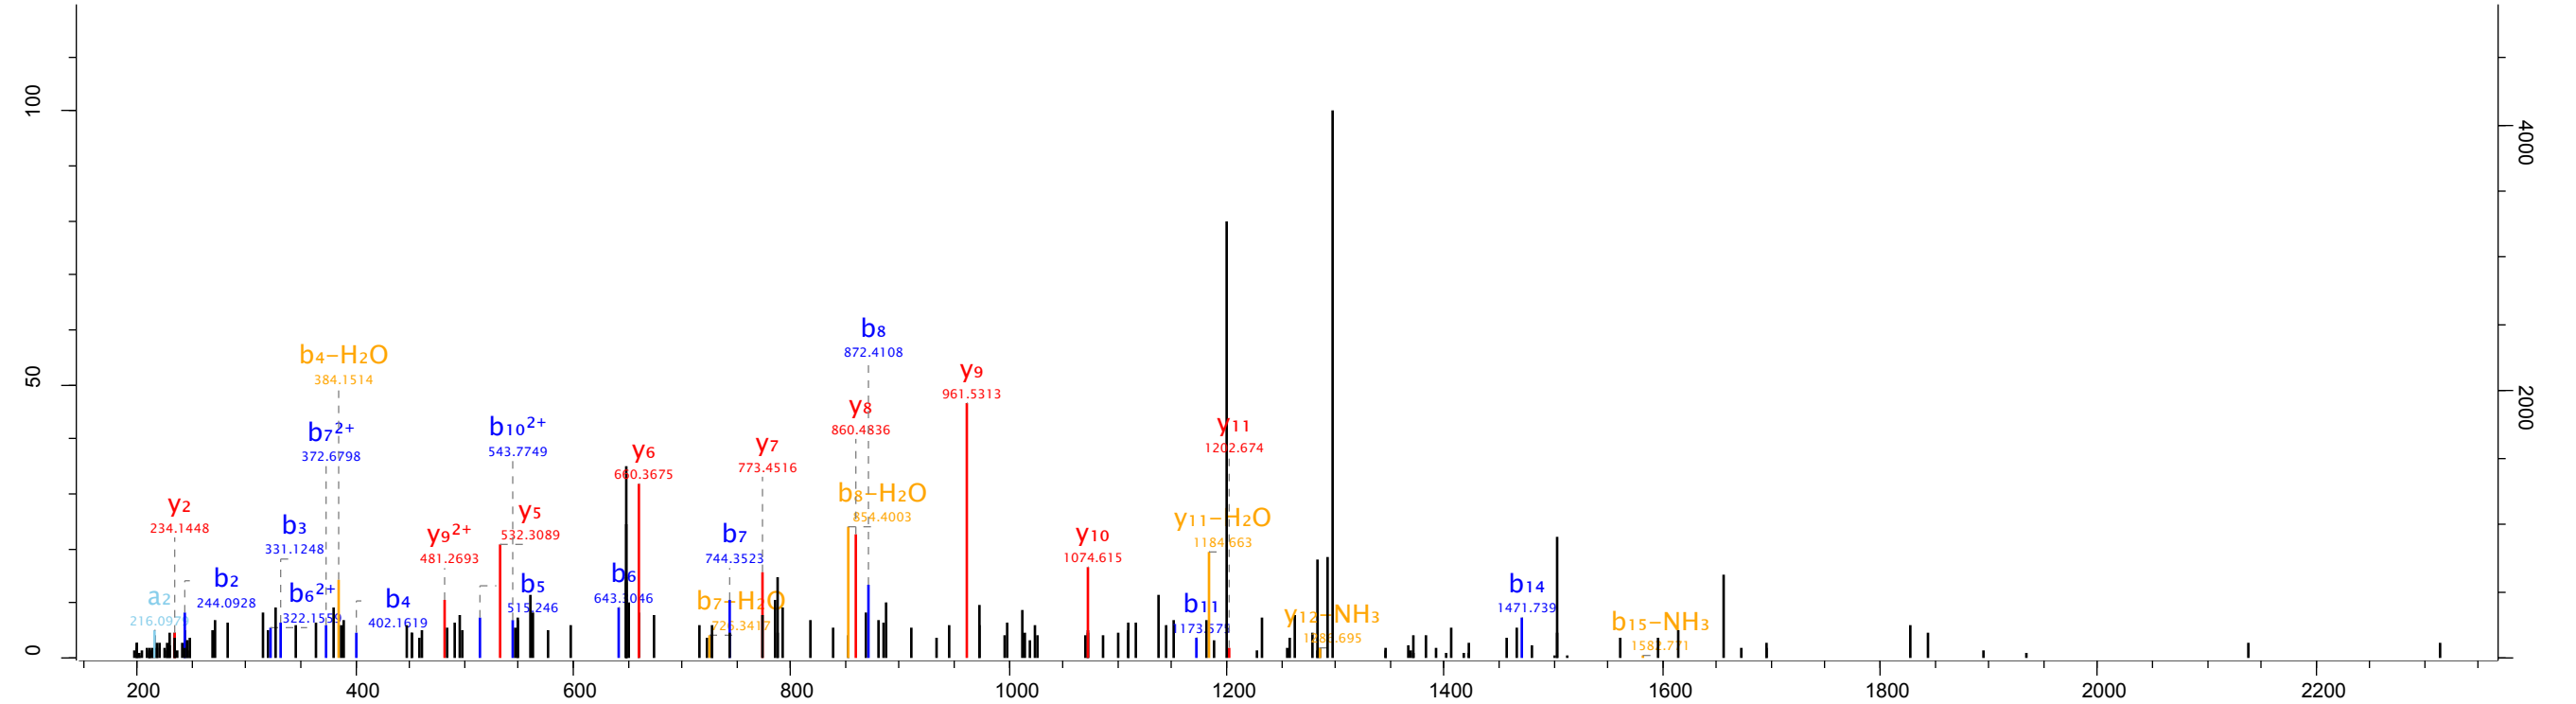

Raw file  
UPS1+500ngY\_90minTop17\_BC4\_01\_358

| Scan  | Method   | Score  | Mass    | Gene names |
|-------|----------|--------|---------|------------|
| 47511 | TOF; CID | 108.43 | 1350.58 | YKL077W    |

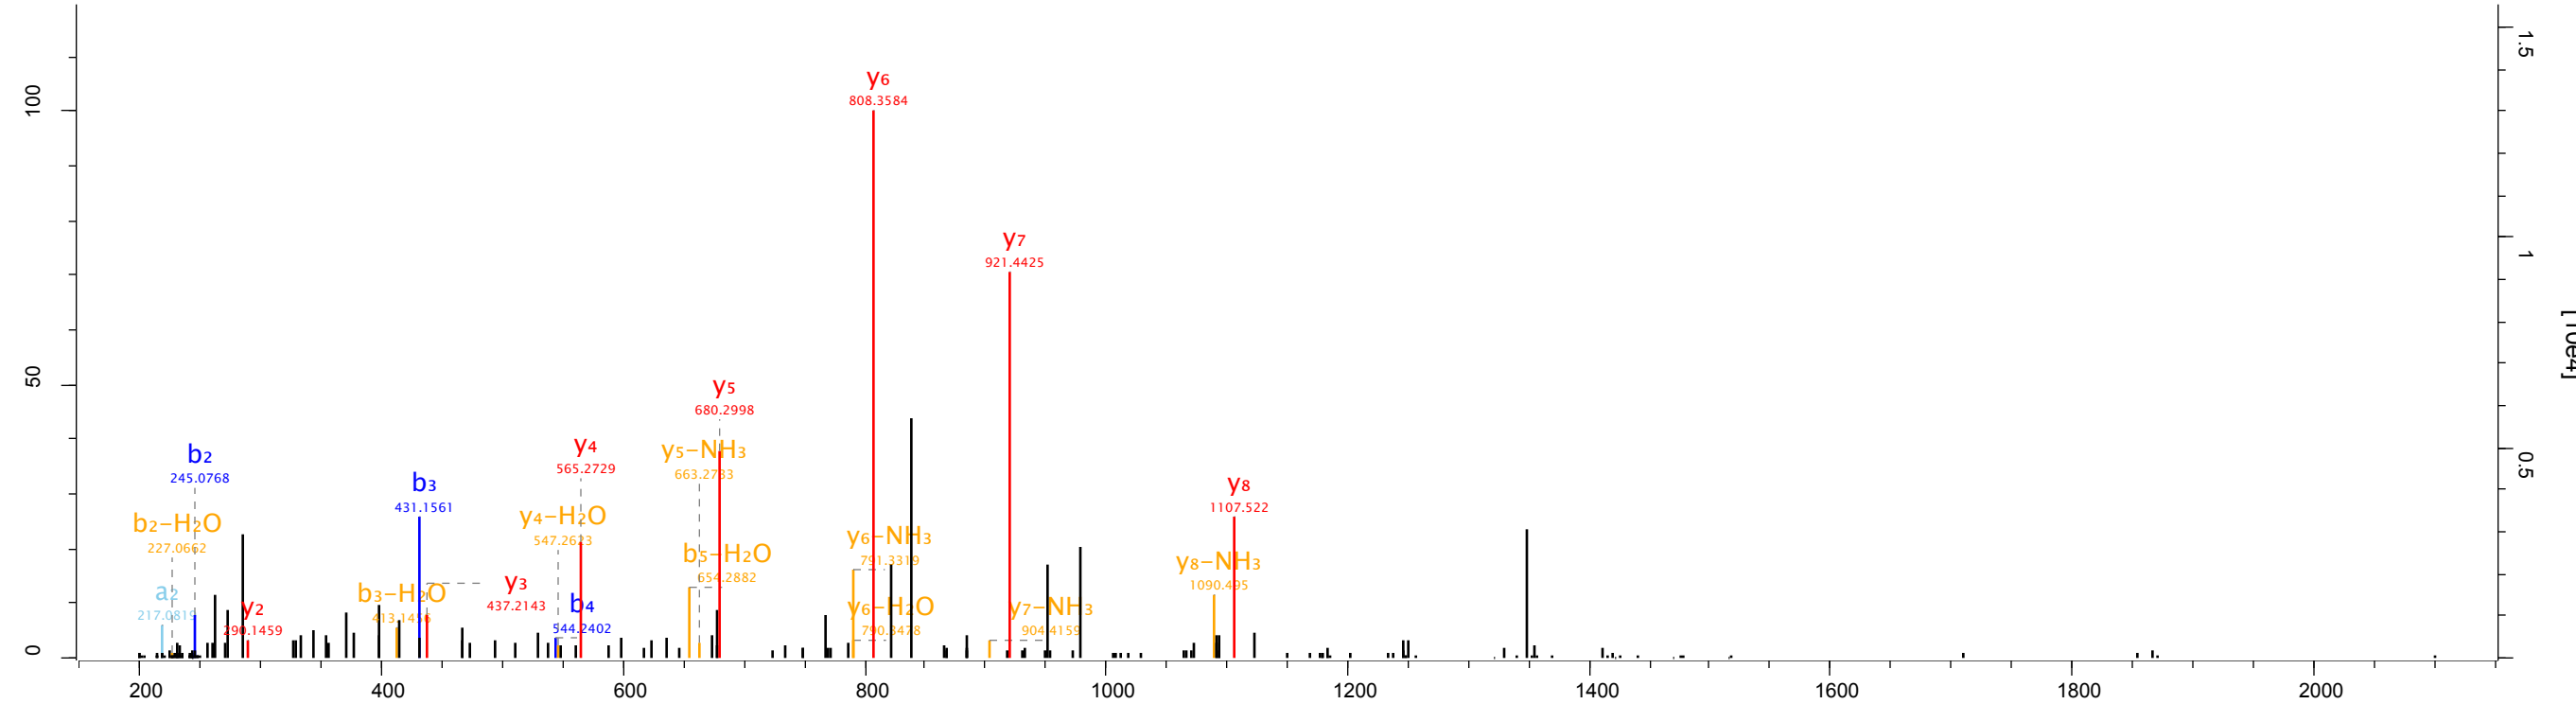

Raw file

UPS1+500ngY\_90minTop17\_BC4\_01\_358

Scan 47814 Method TOF; CID Score 88.02 Mass 1318.6 Gene names VPS68

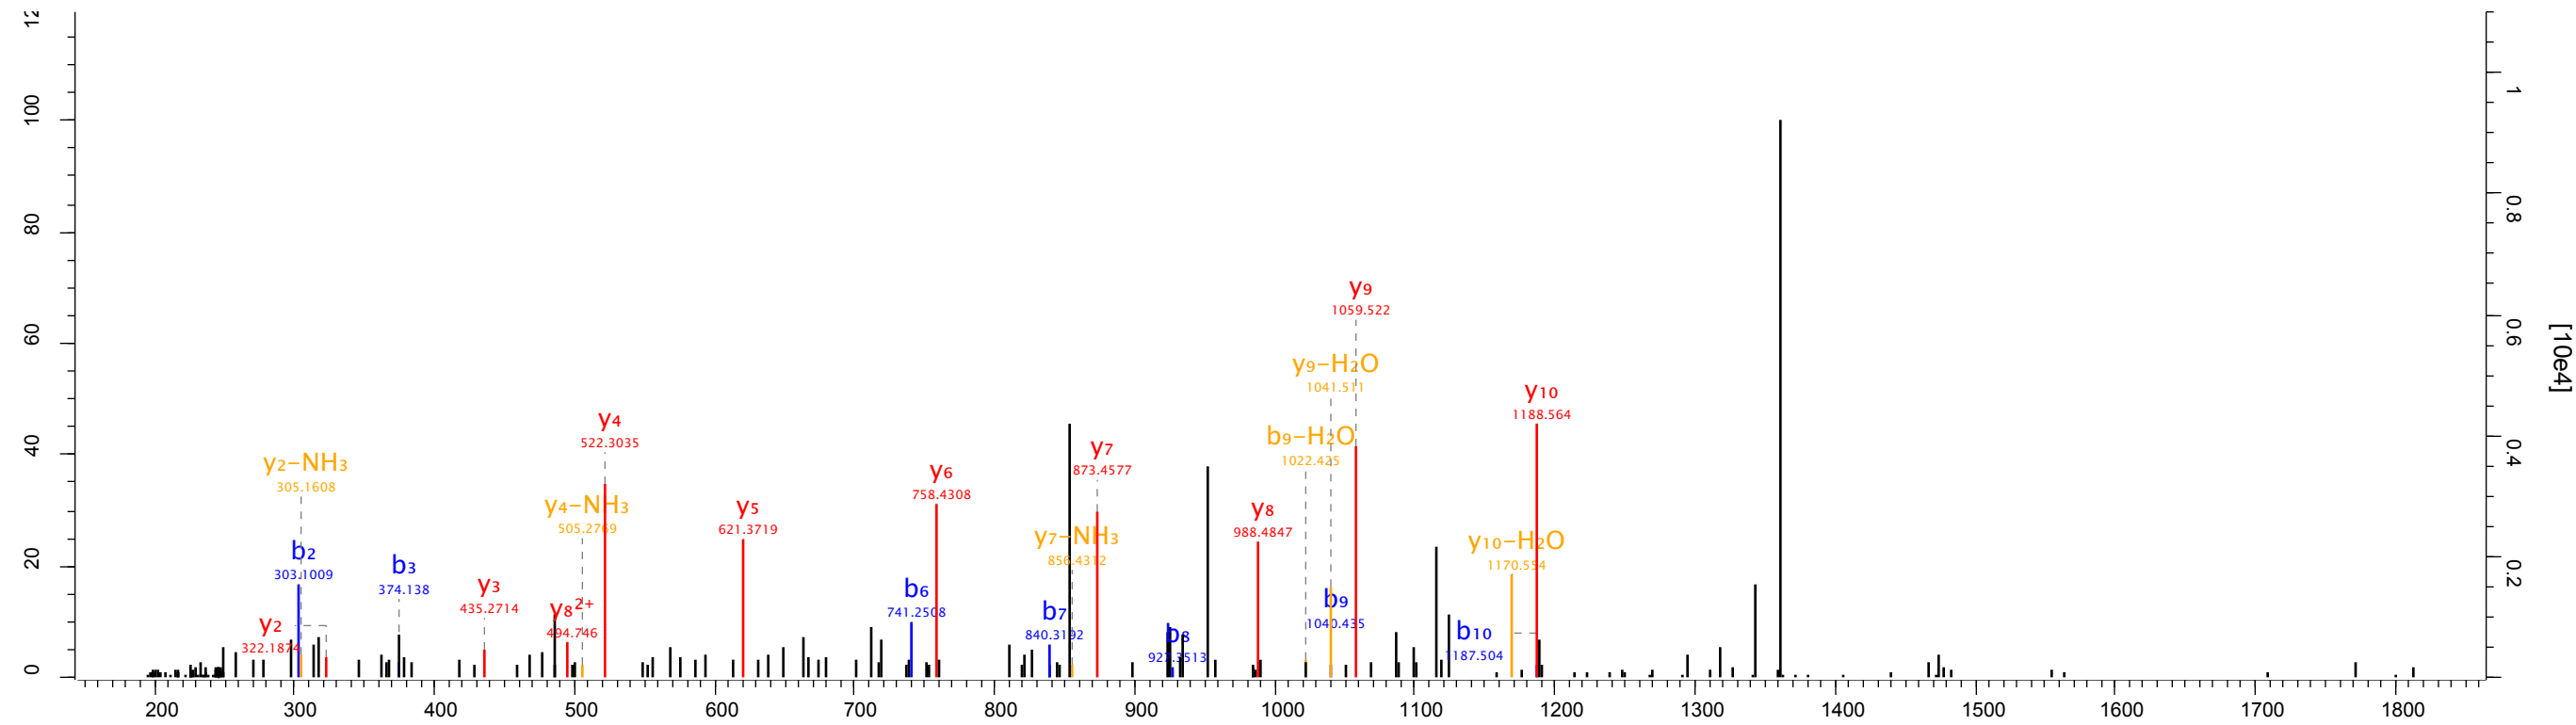

Raw file  
UPS1+500ngY\_90minTop17\_BC4\_01\_358

Scan 47890 Method TOF; CID Score 59.34 Mass 1953.99 Gene names PGC1

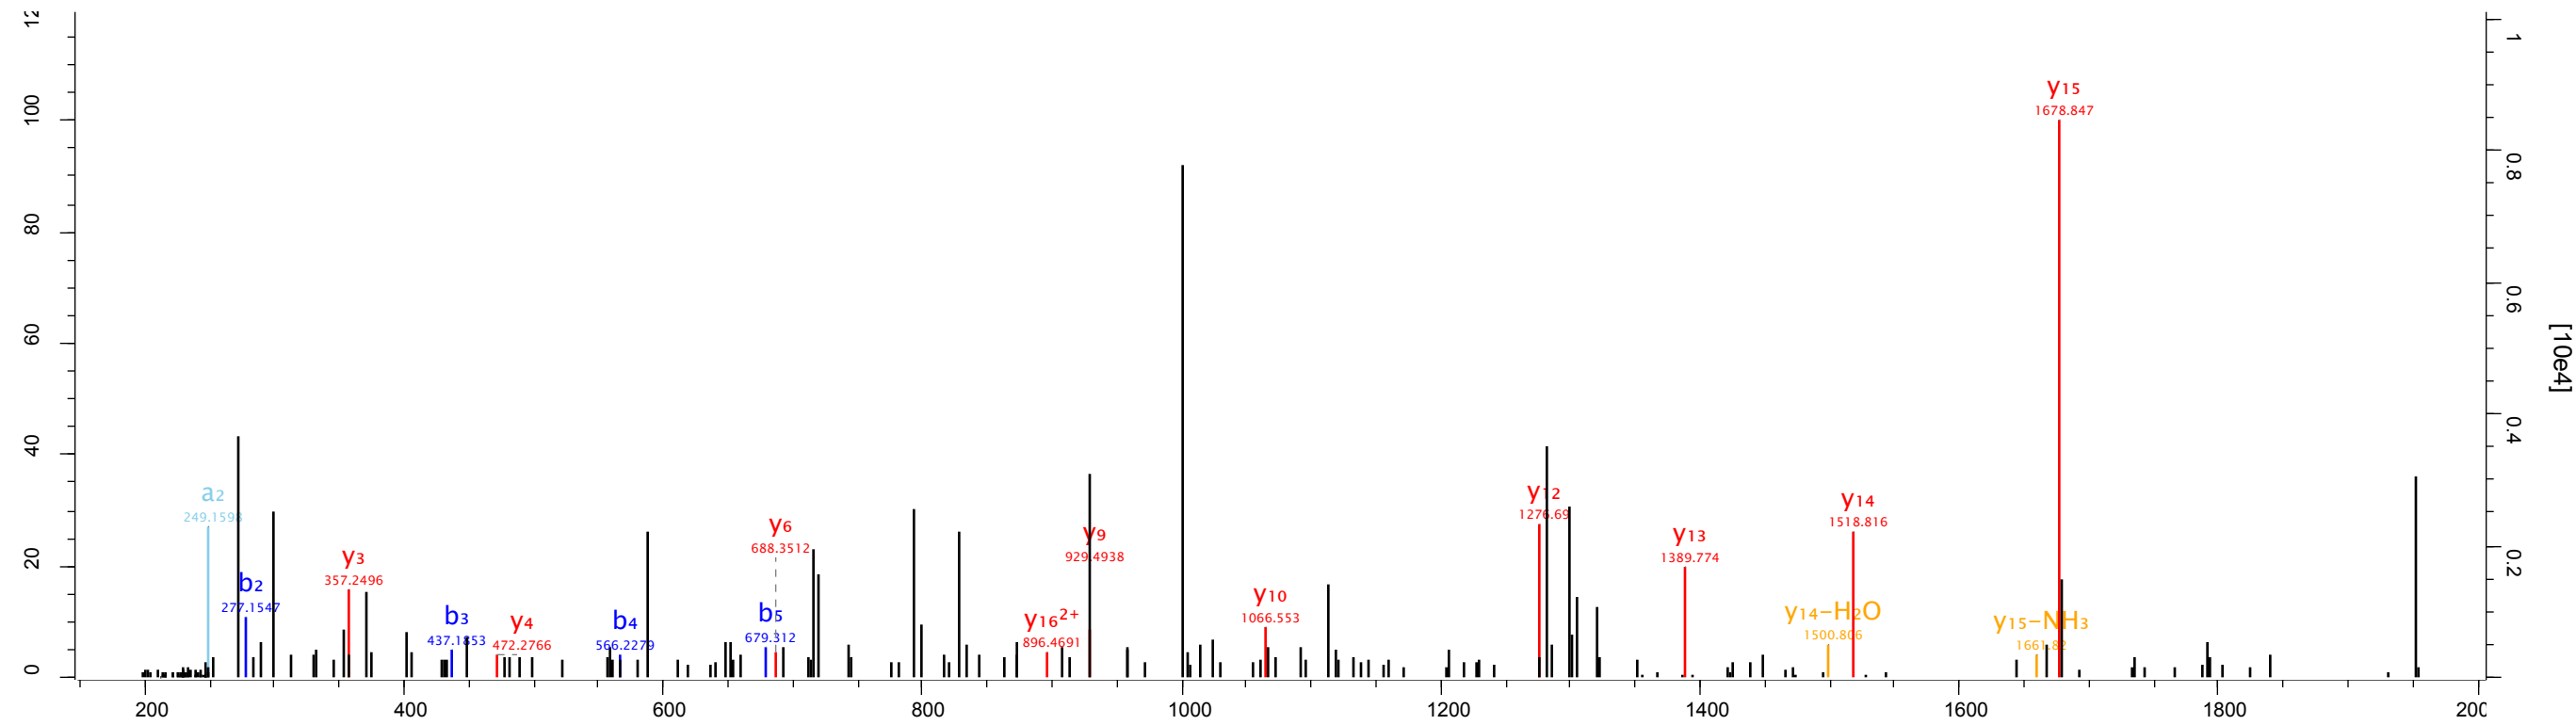

Raw file

UPS1+500ngY\_90minTop17\_BC4\_01\_358

| Scan  | Method   | Score | Mass    | Gene names |
|-------|----------|-------|---------|------------|
| 48534 | TOF; CID | 45    | 2020.94 | ECM4       |

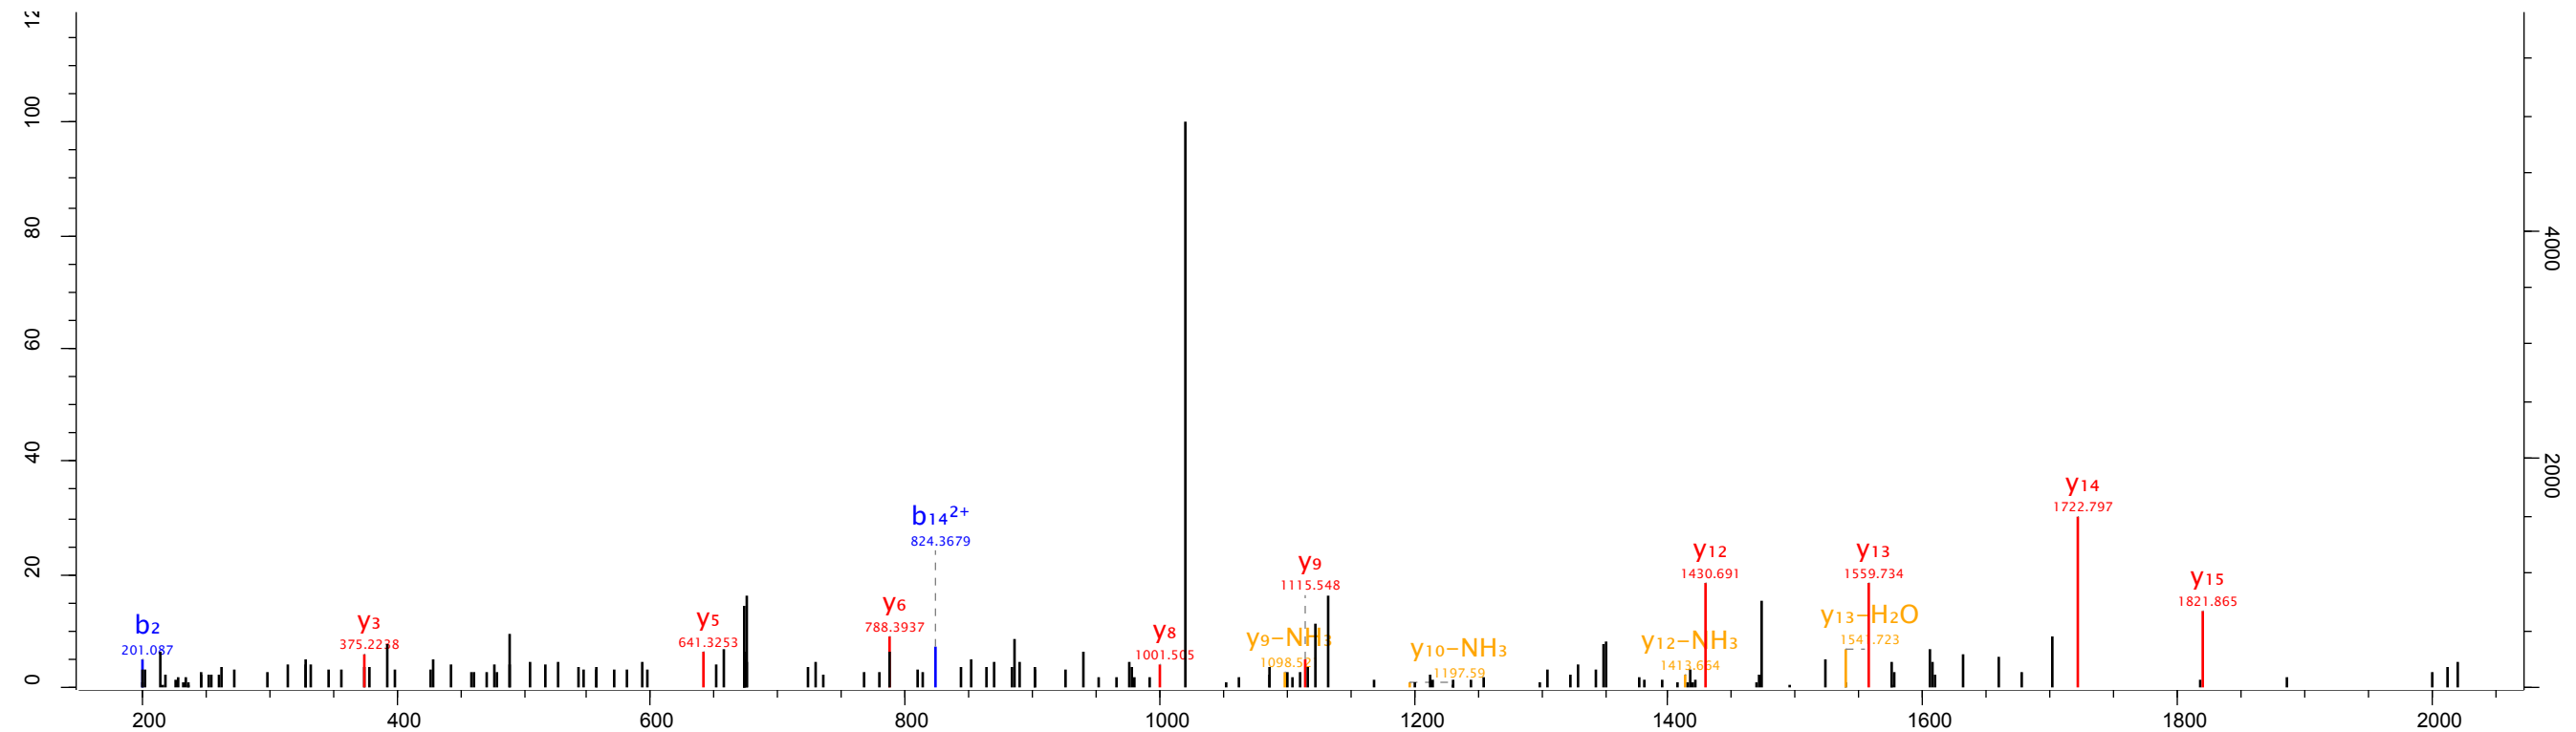

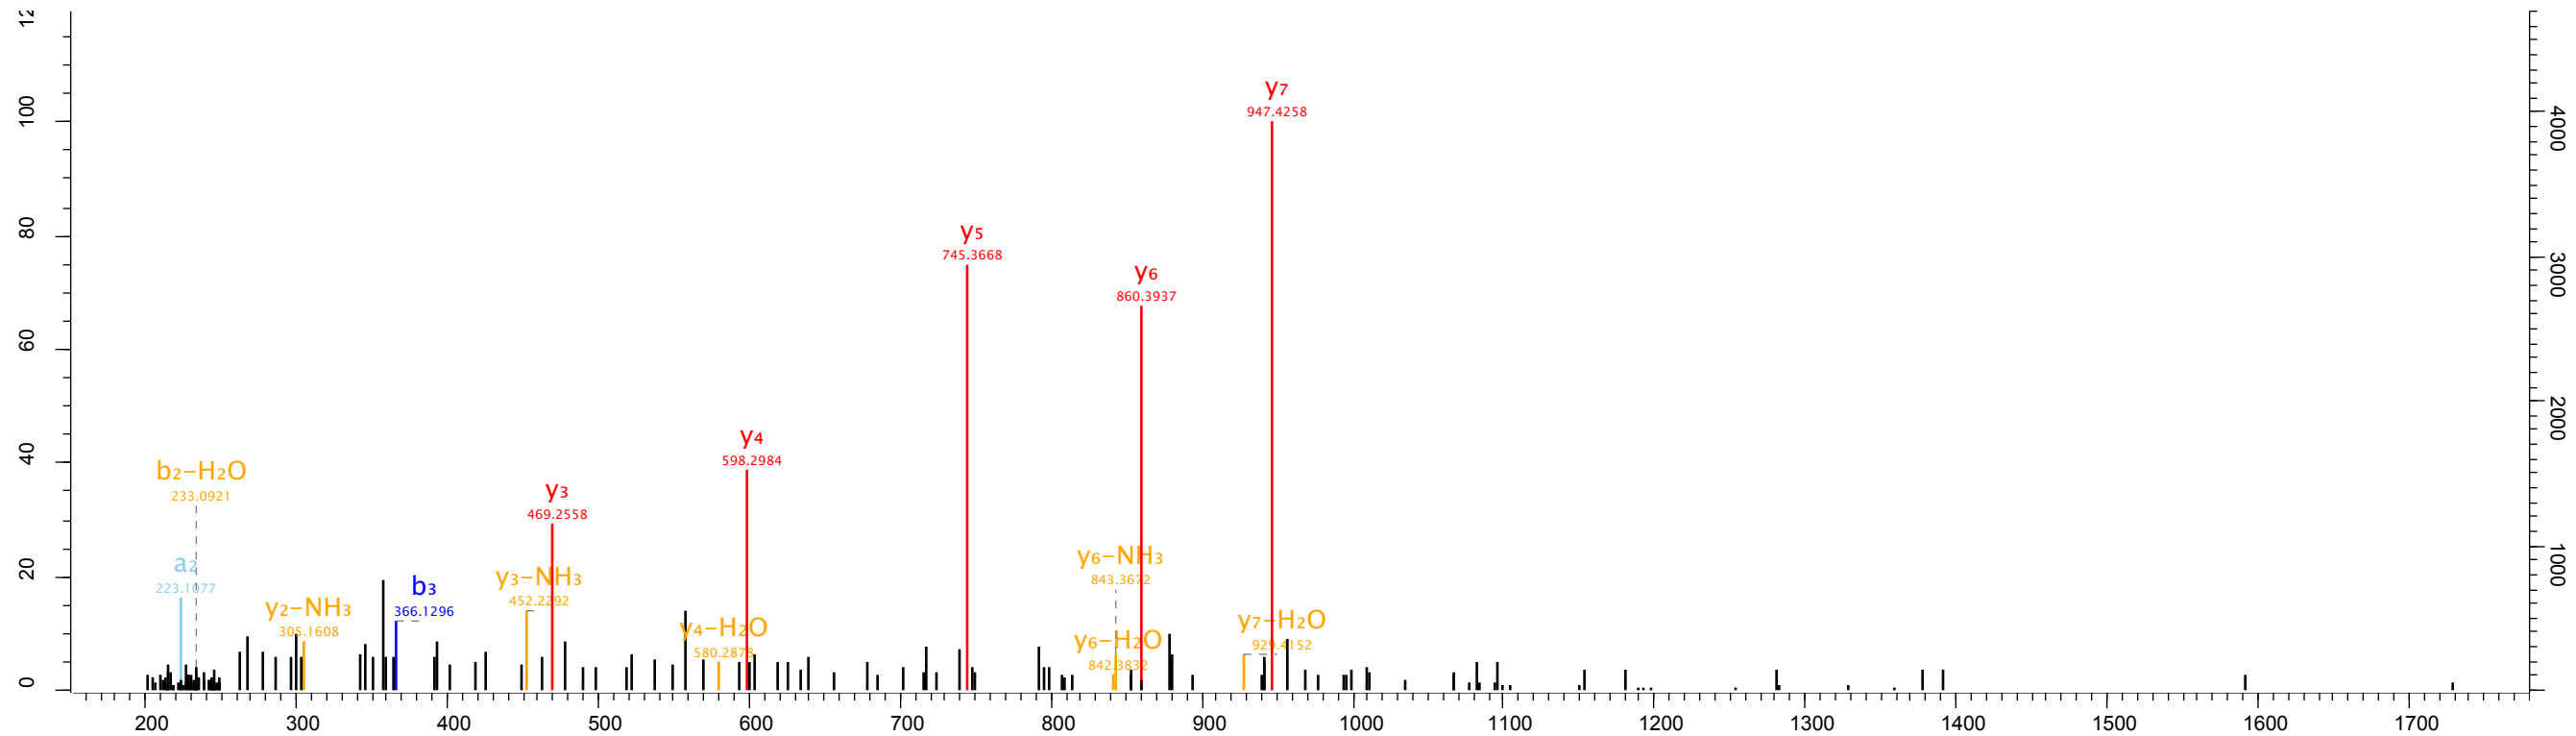



Raw file

UPS1+500ngY\_90minTop17\_BC4\_01\_358

| Scan  | Method   | Score | Mass    | Gene names |
|-------|----------|-------|---------|------------|
| 49510 | TOF; CID | 57.17 | 1116.64 | PCC1       |

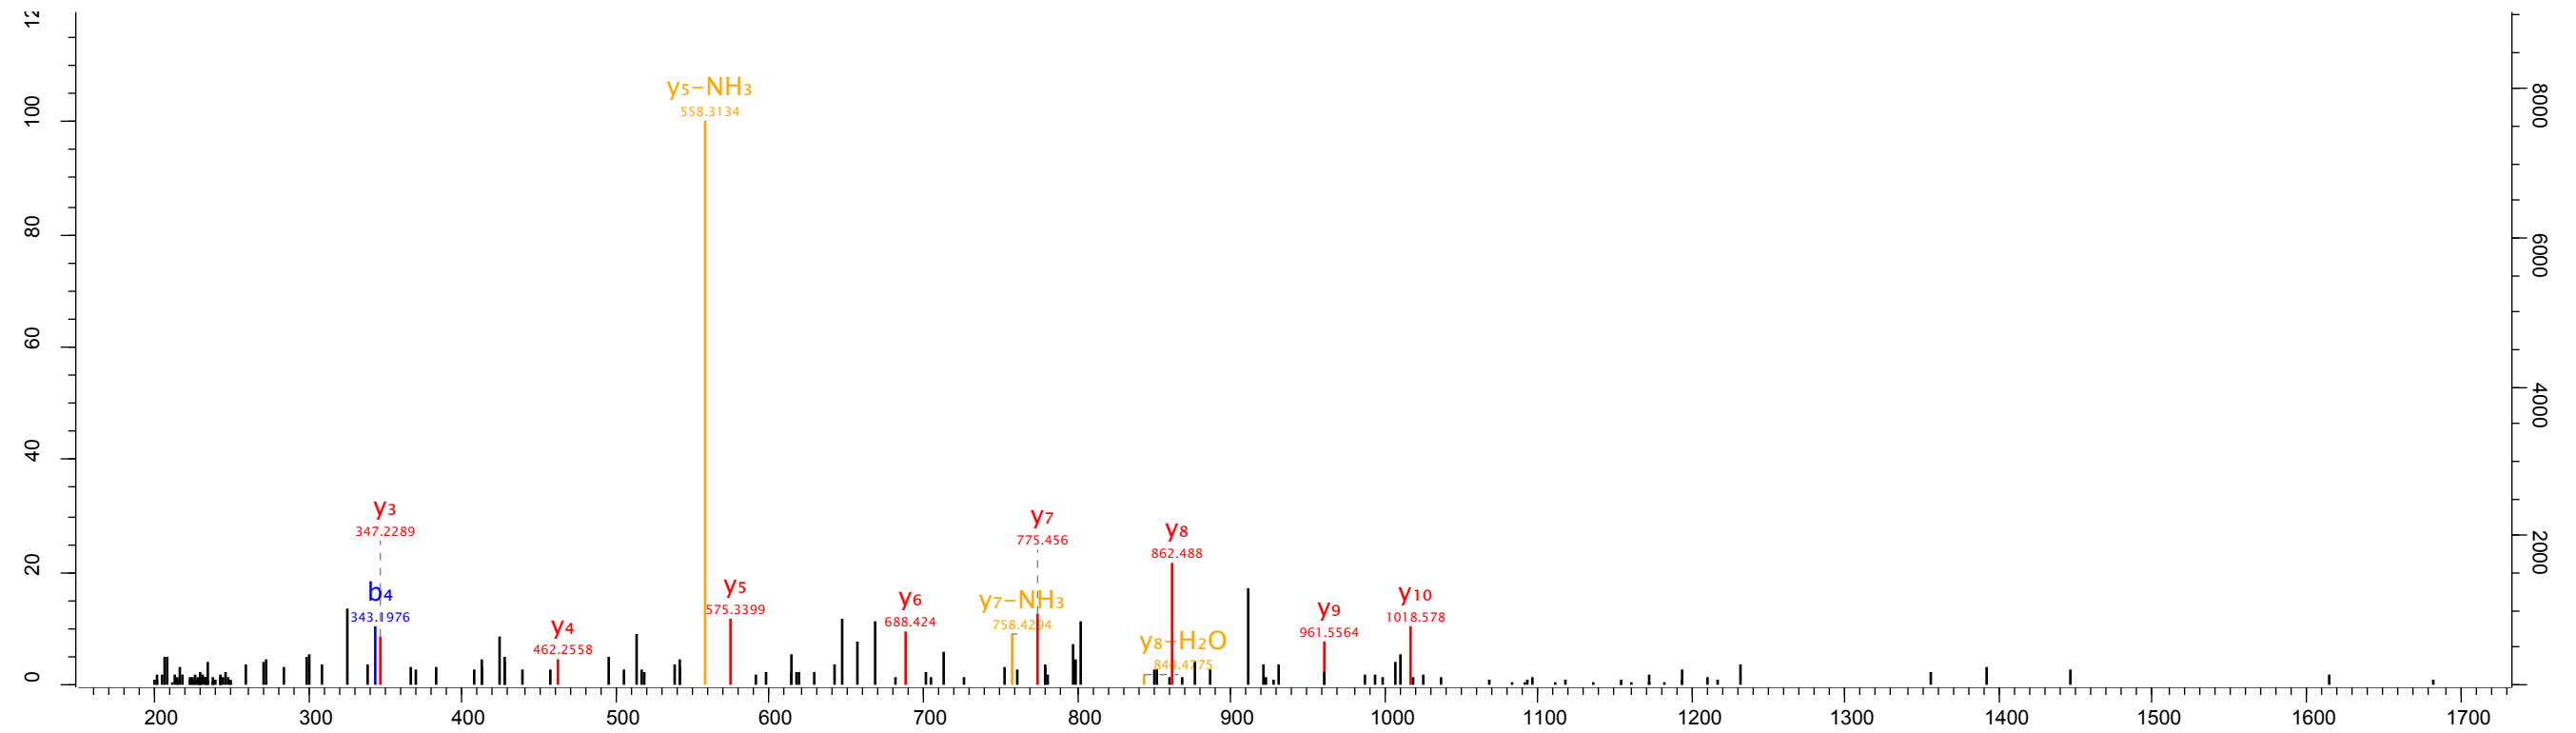

Raw file  
UPS1+500ngY\_90minTop17\_BC4\_01\_358

Scan 49731 Method TOF; CID Score 61.26 Mass 1829.87 Gene names MET14

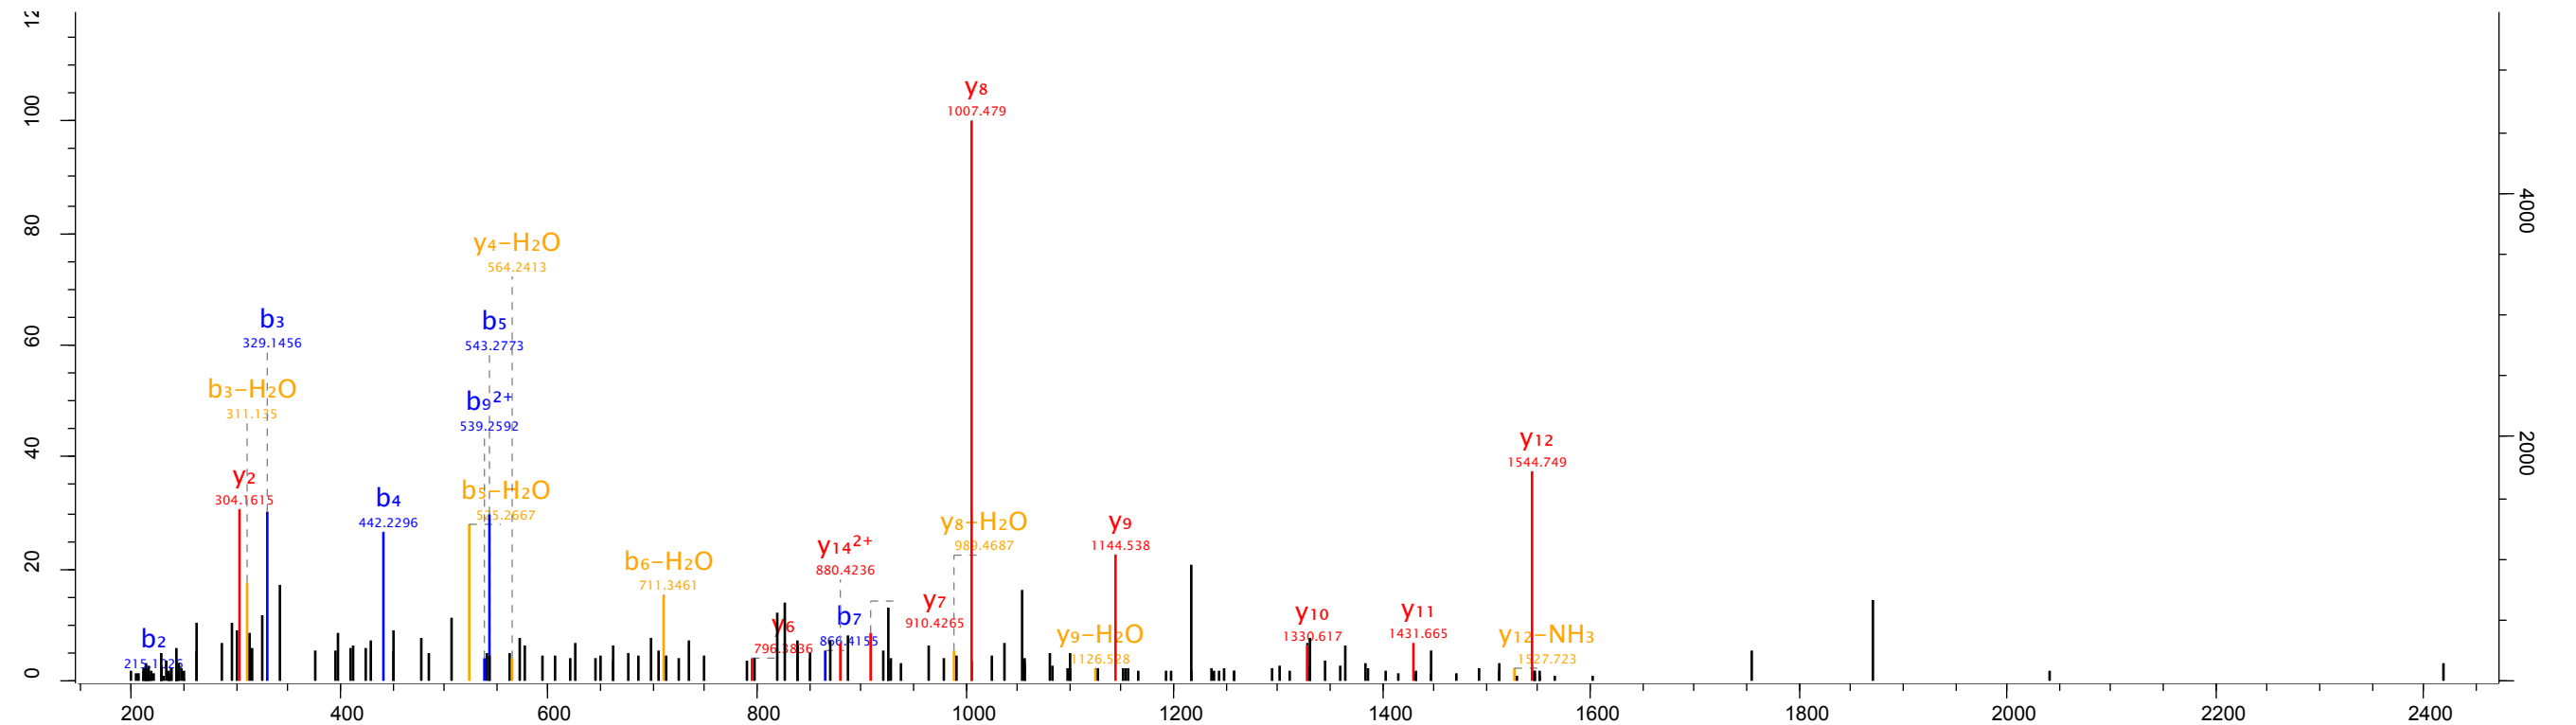

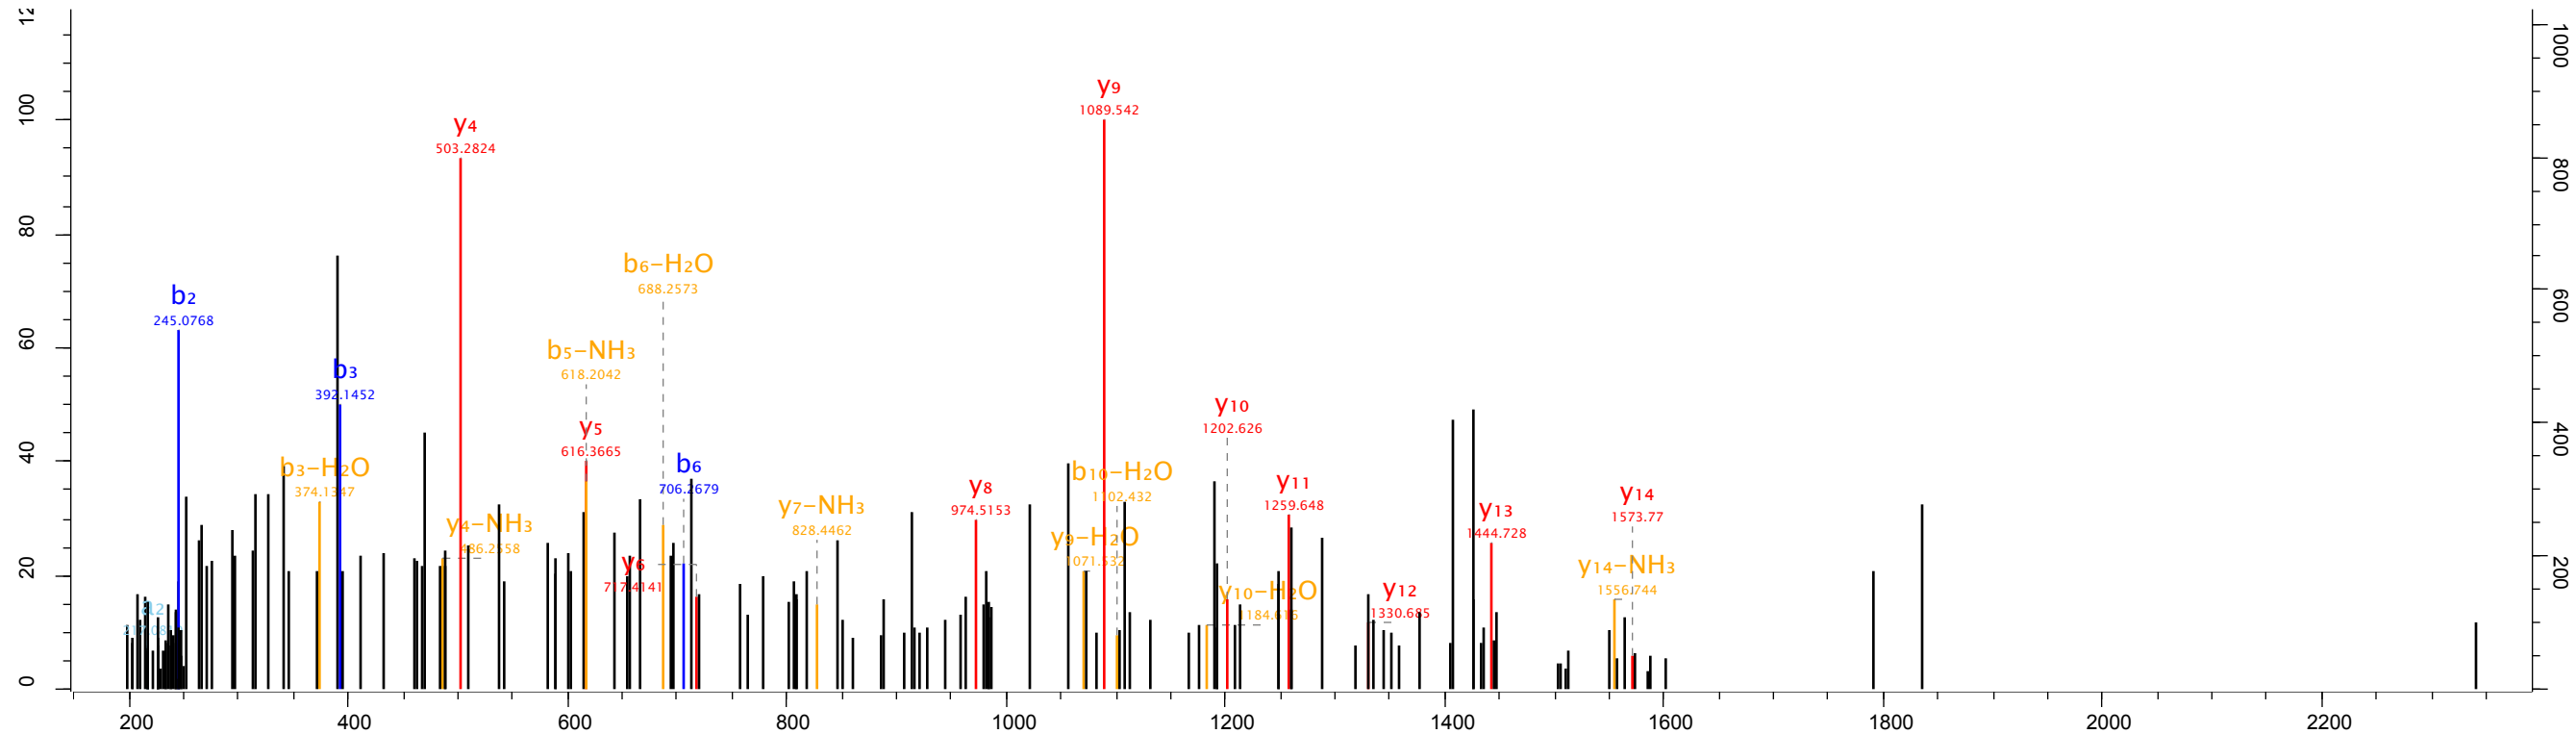

Raw file

UPS1+500ngY\_90minTop17\_BC4\_01\_358

Scan  
50129Method  
TOF; CIDScore  
64.27Mass  
2779.27Gene names  
MDE1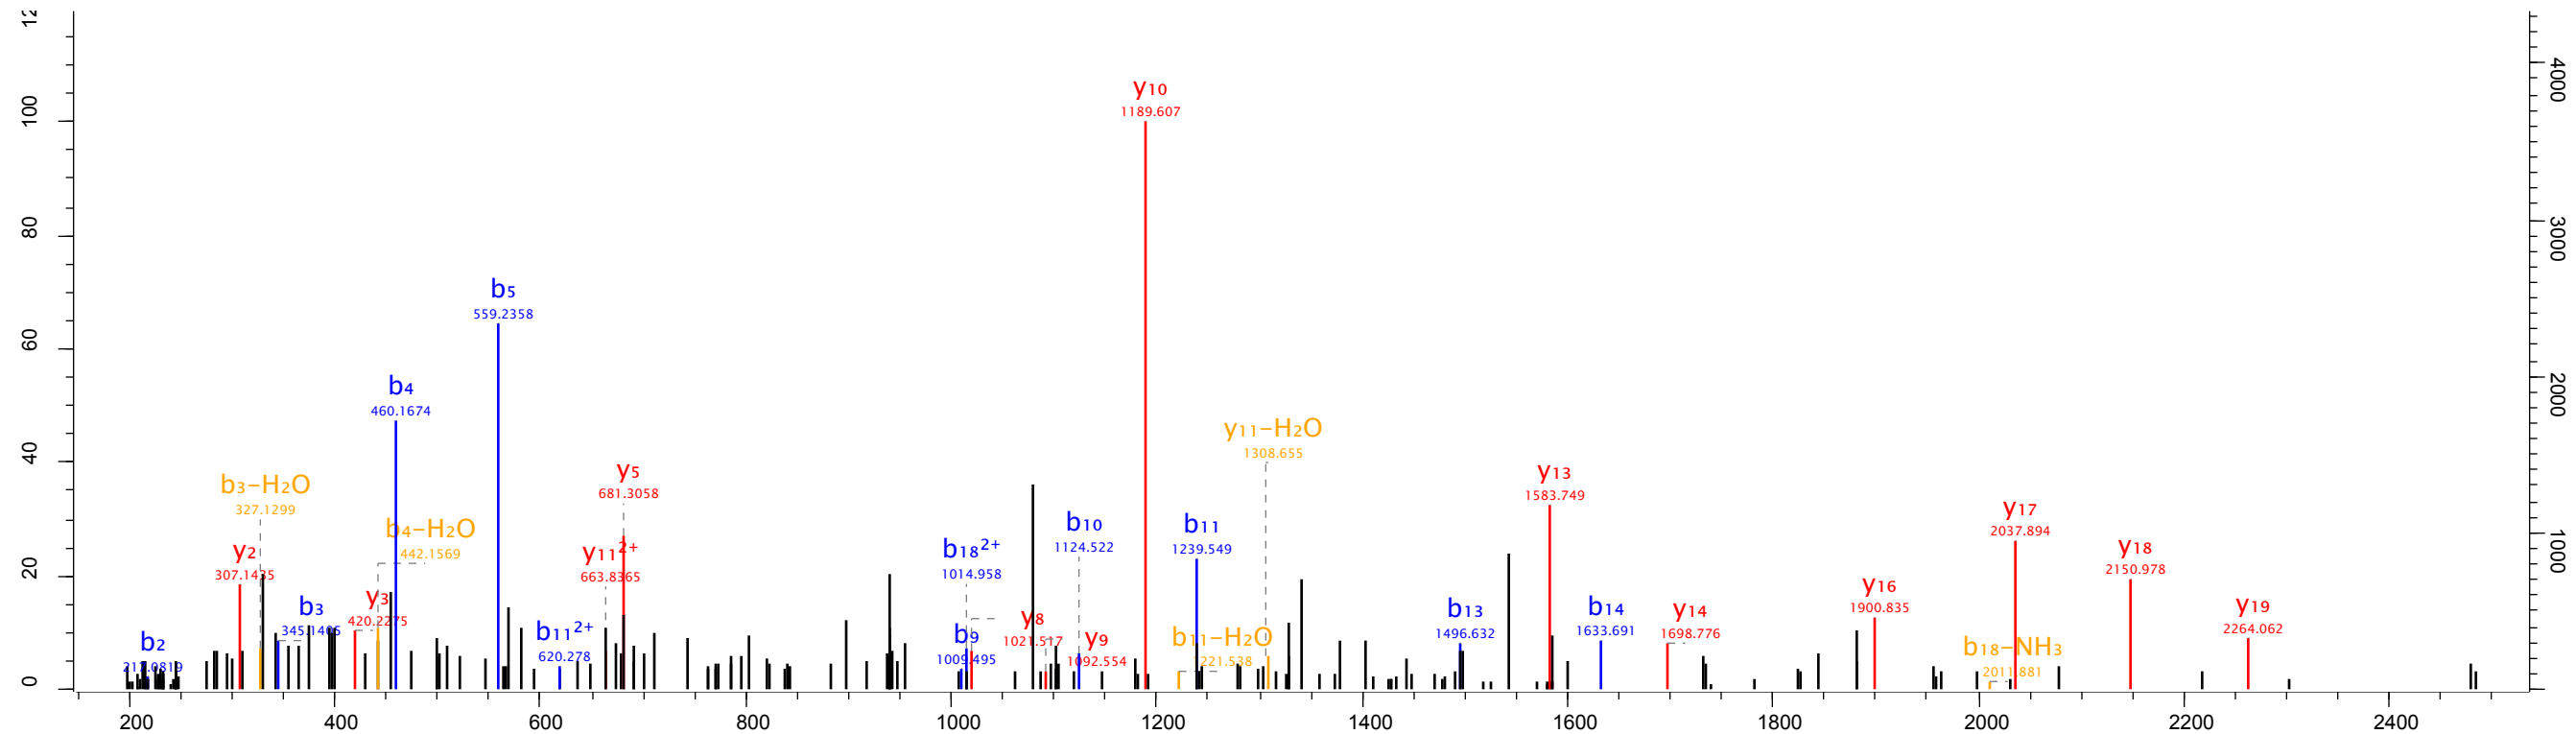

Raw file

UPS1+500ngY\_90minTop17\_BC4\_01\_358

| Scan  | Method   | Score | Mass    | Gene names |
|-------|----------|-------|---------|------------|
| 50644 | TOF; CID | 78.96 | 1366.75 | CPD1       |

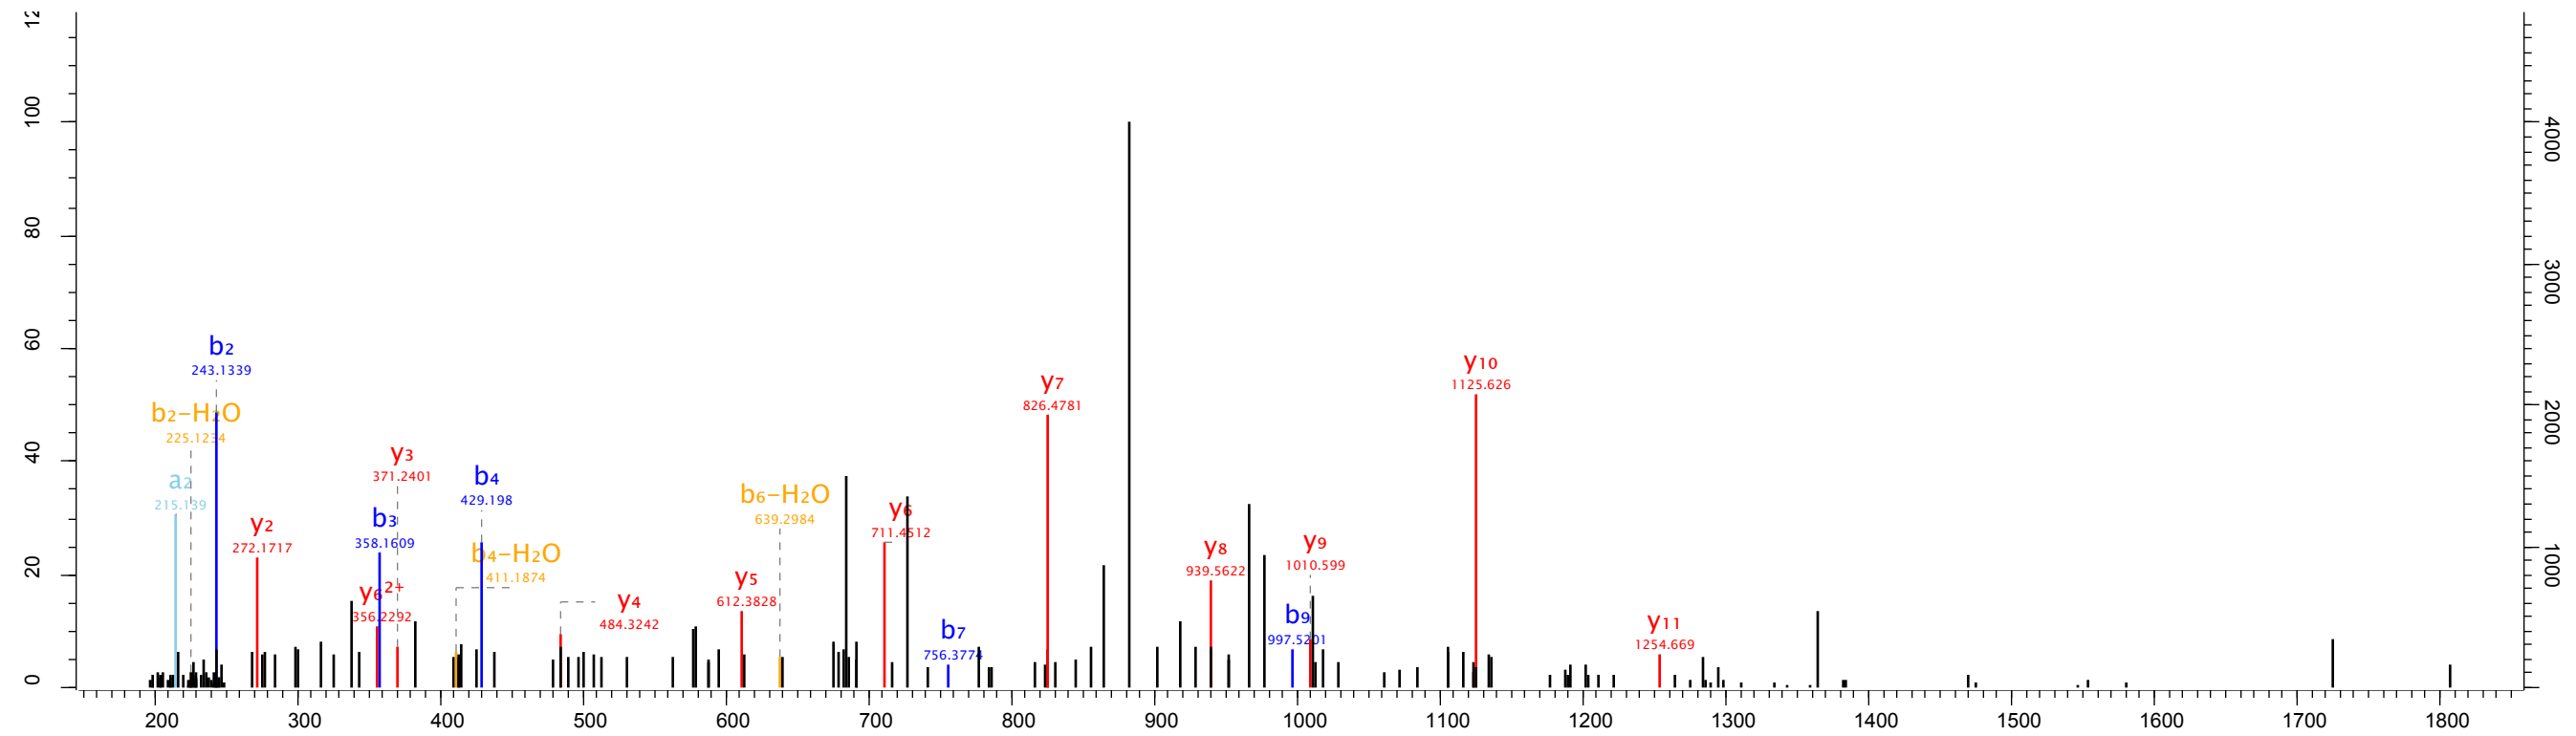

Raw file  
UPS1+500ngY\_90minTop17\_BC4\_01\_358

Scan 50892 Method TOF; CID Score 103.31 Mass 2016.99 Gene names RPC10

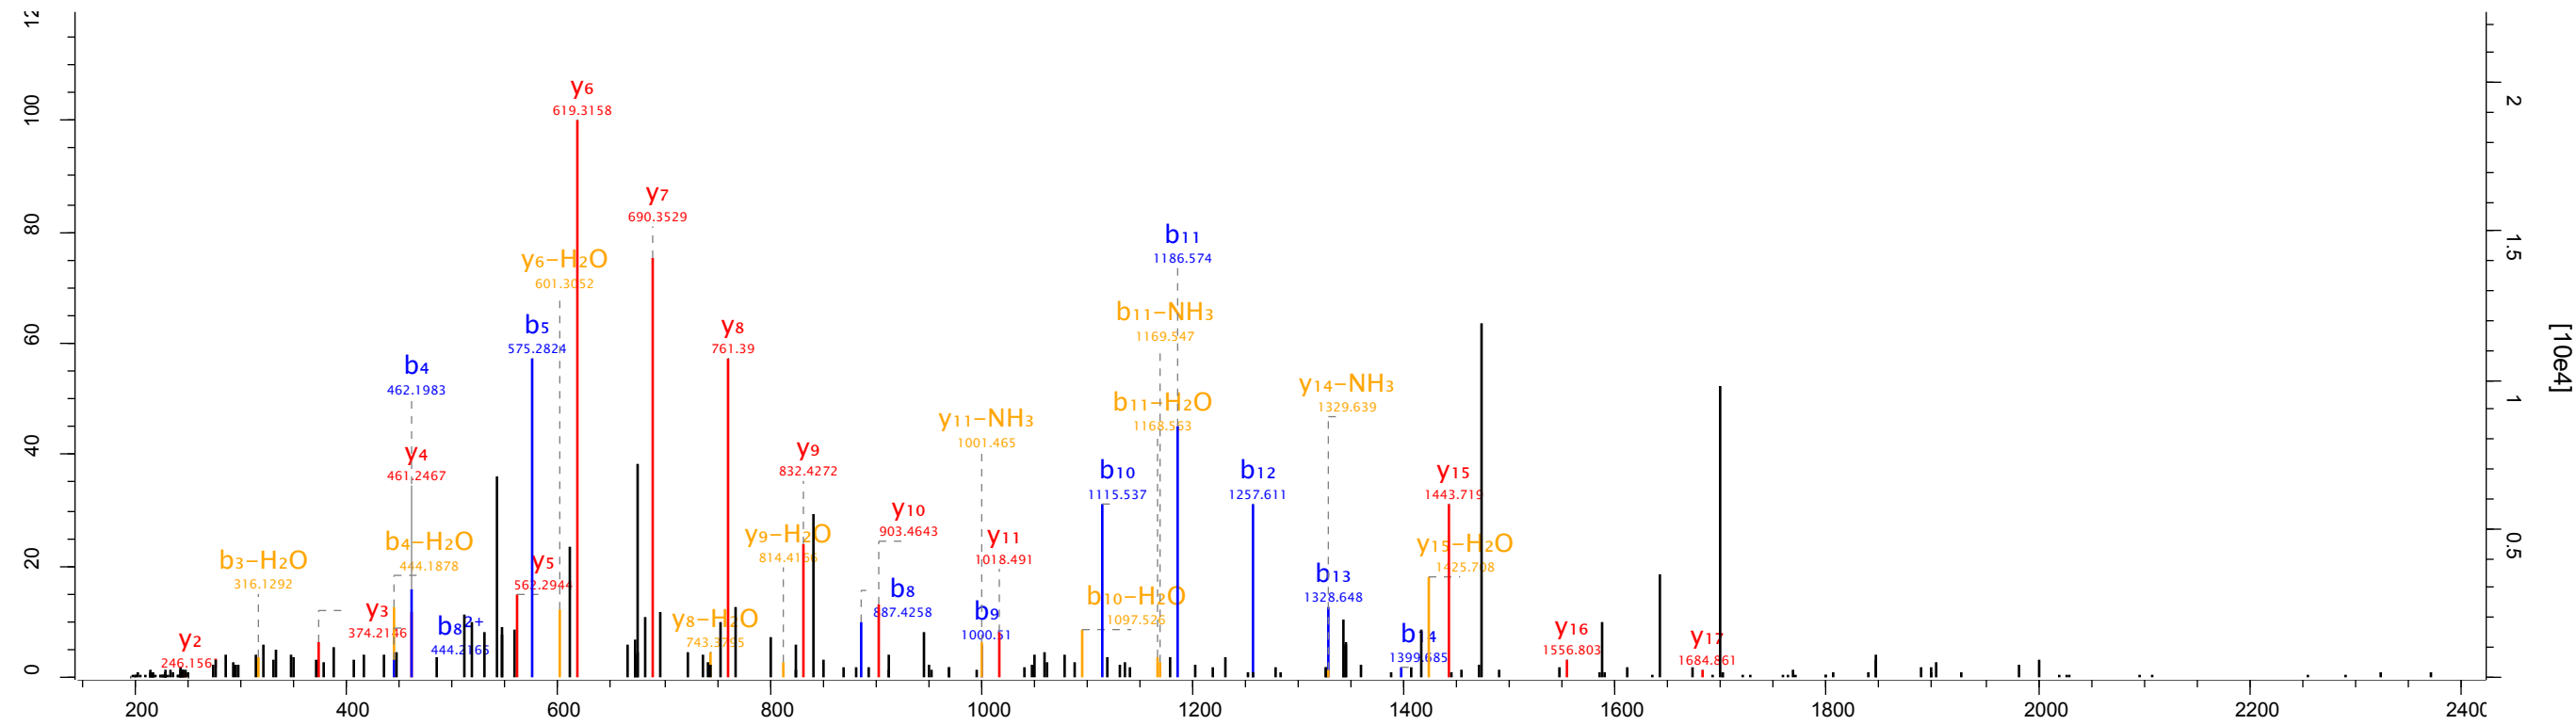

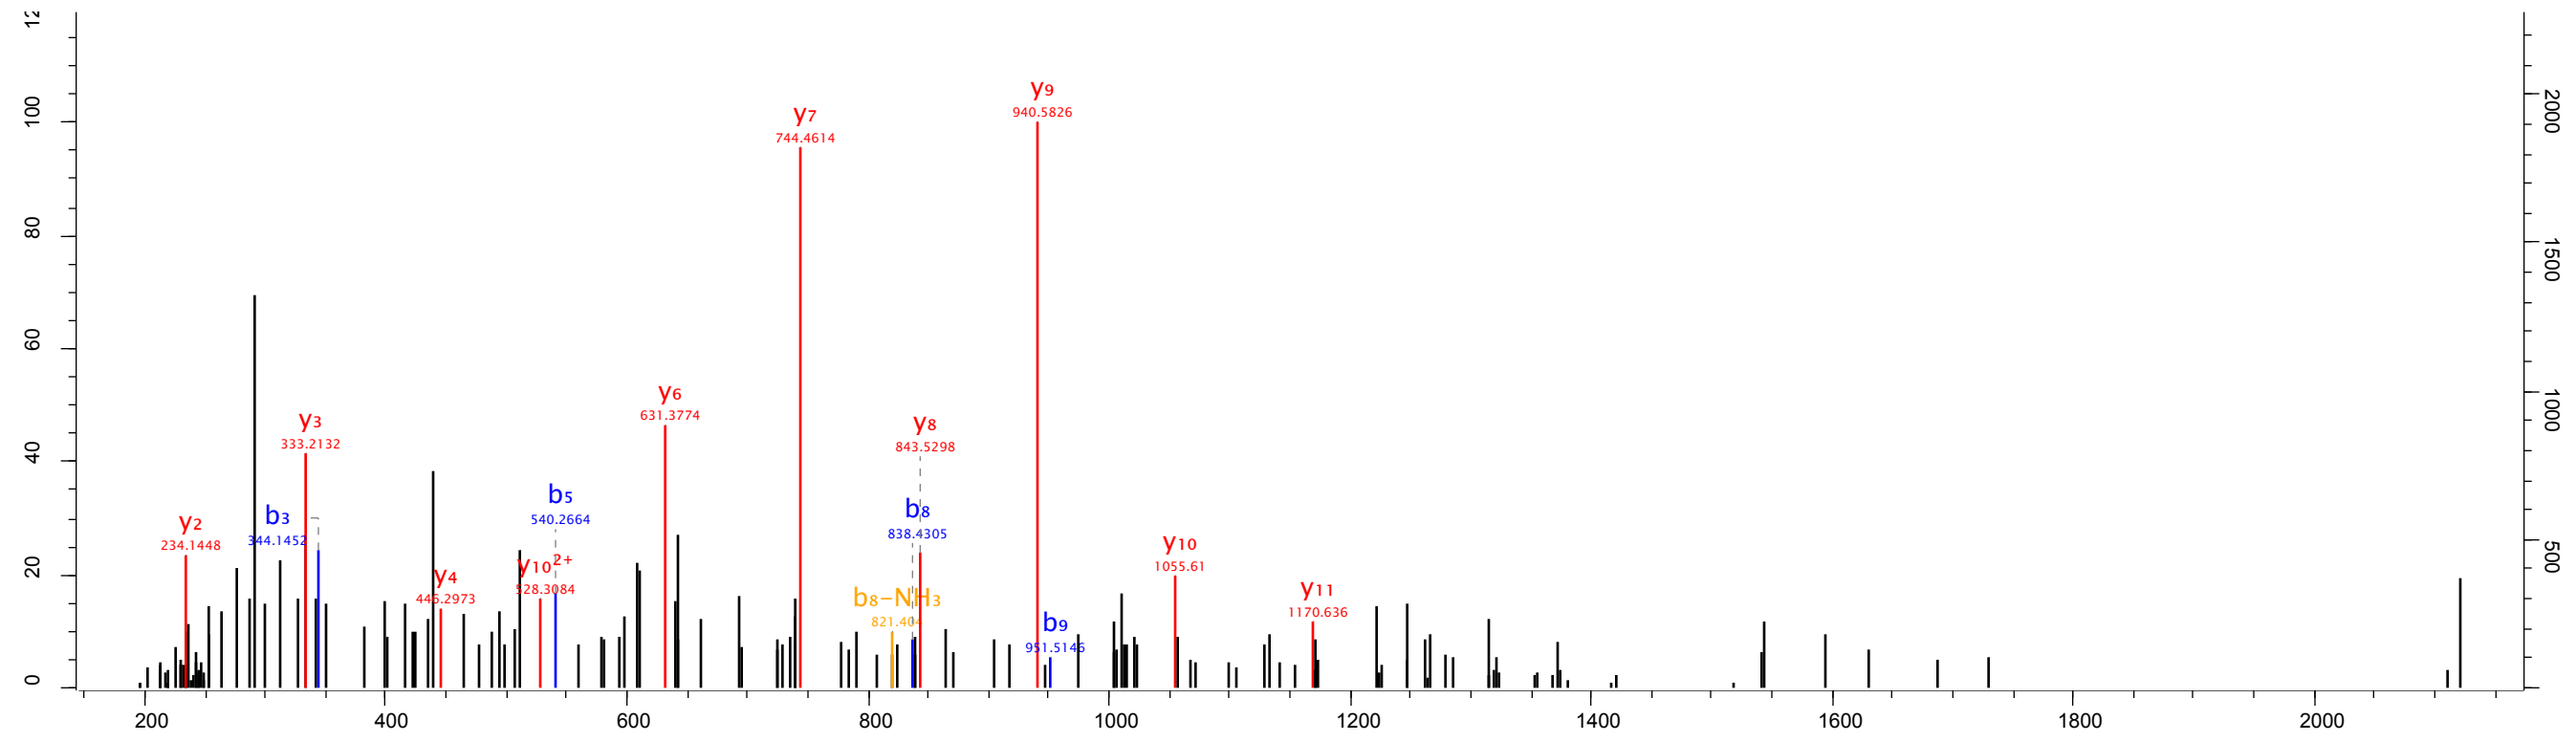

Raw file  
UPS1+500ngY\_90minTop17\_BC4\_01\_358

| Scan  | Method   | Score | Mass    | Gene names |
|-------|----------|-------|---------|------------|
| 52006 | TOF; CID | 48.28 | 1076.55 | AIM29      |

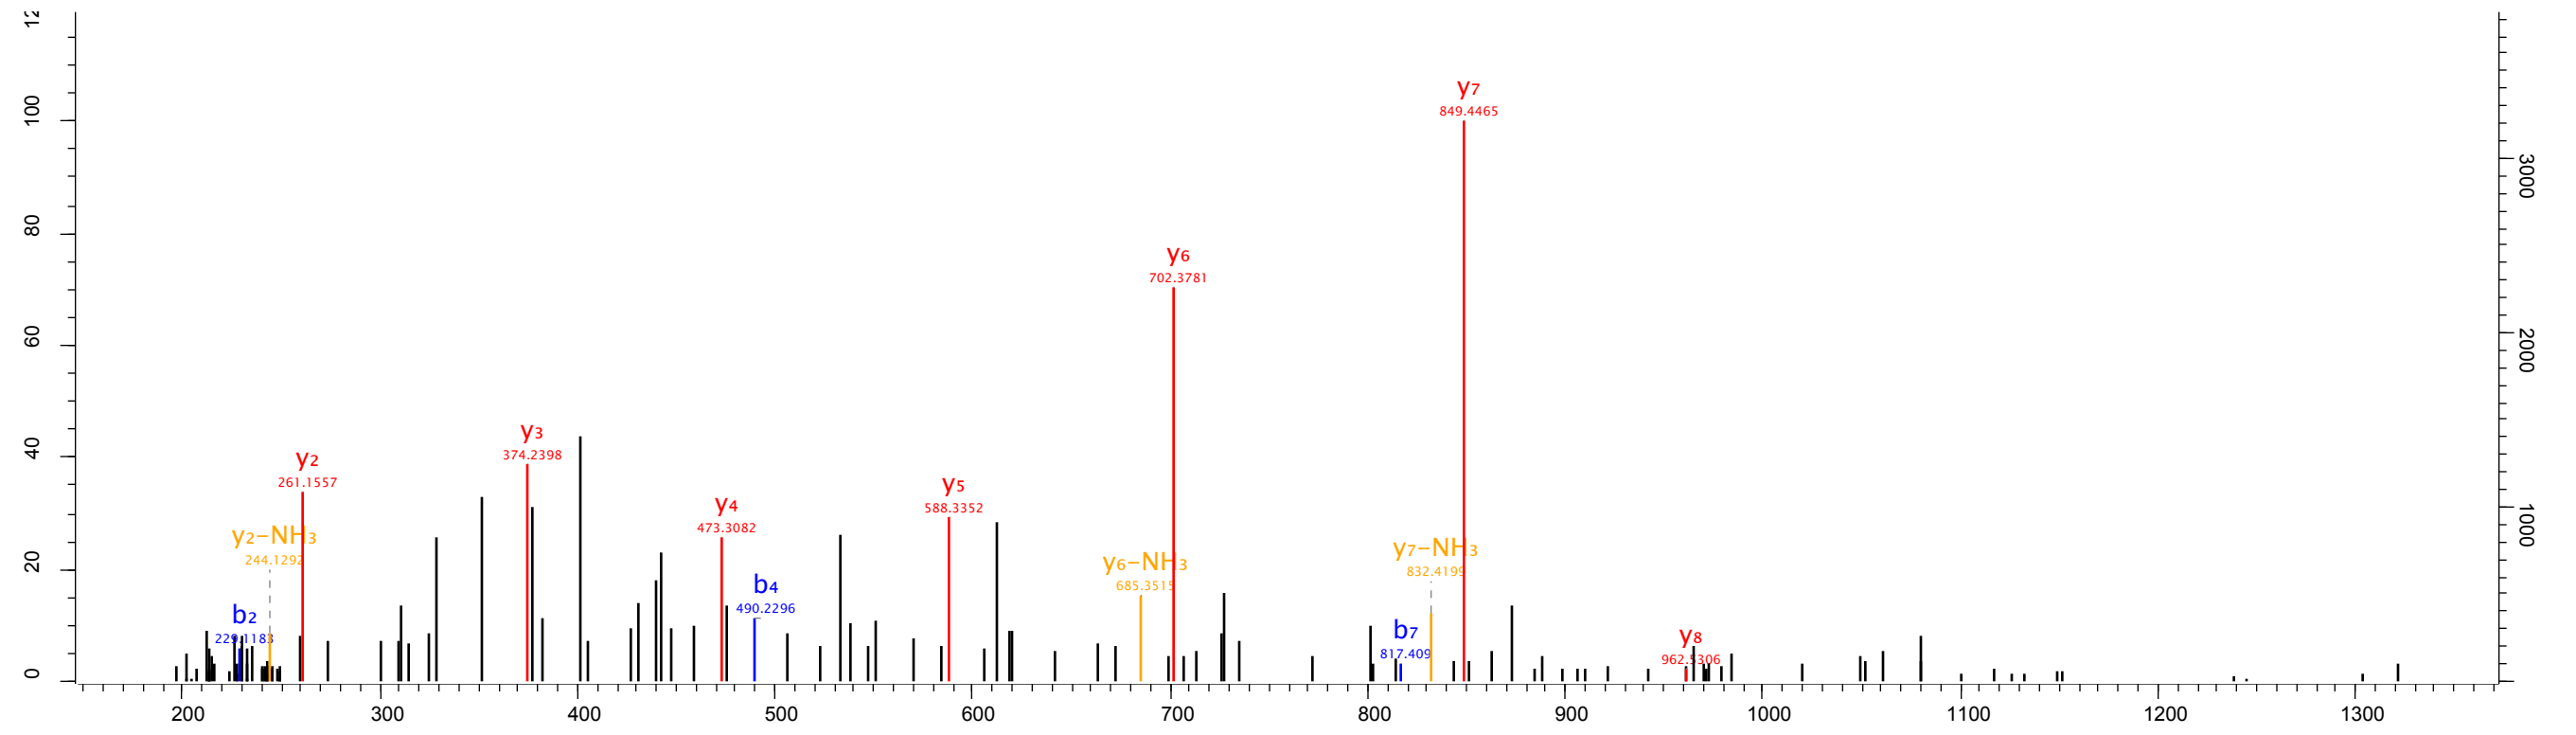



Raw file

UPS1+500ngY\_90minTop17\_BC4\_01\_358

Scan  
52600Method  
TOF; CIDScore  
57.59Mass  
1125.55Gene names  
GGC1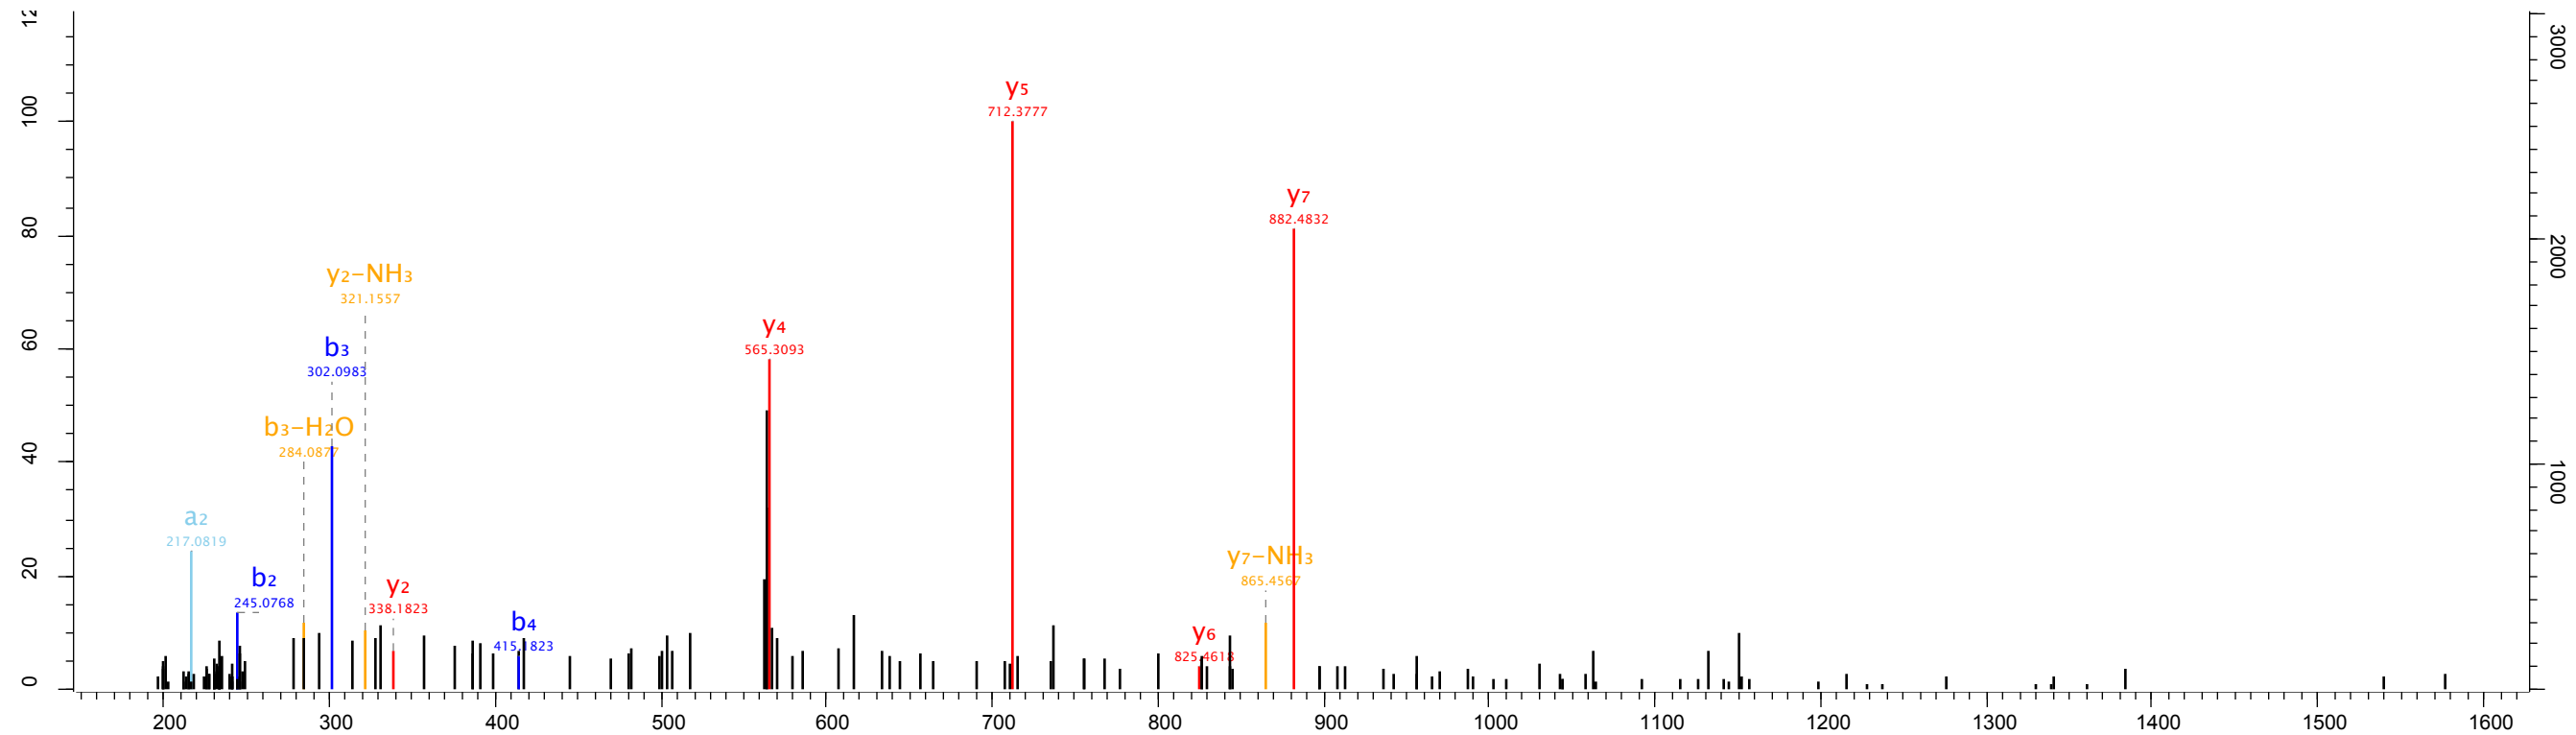

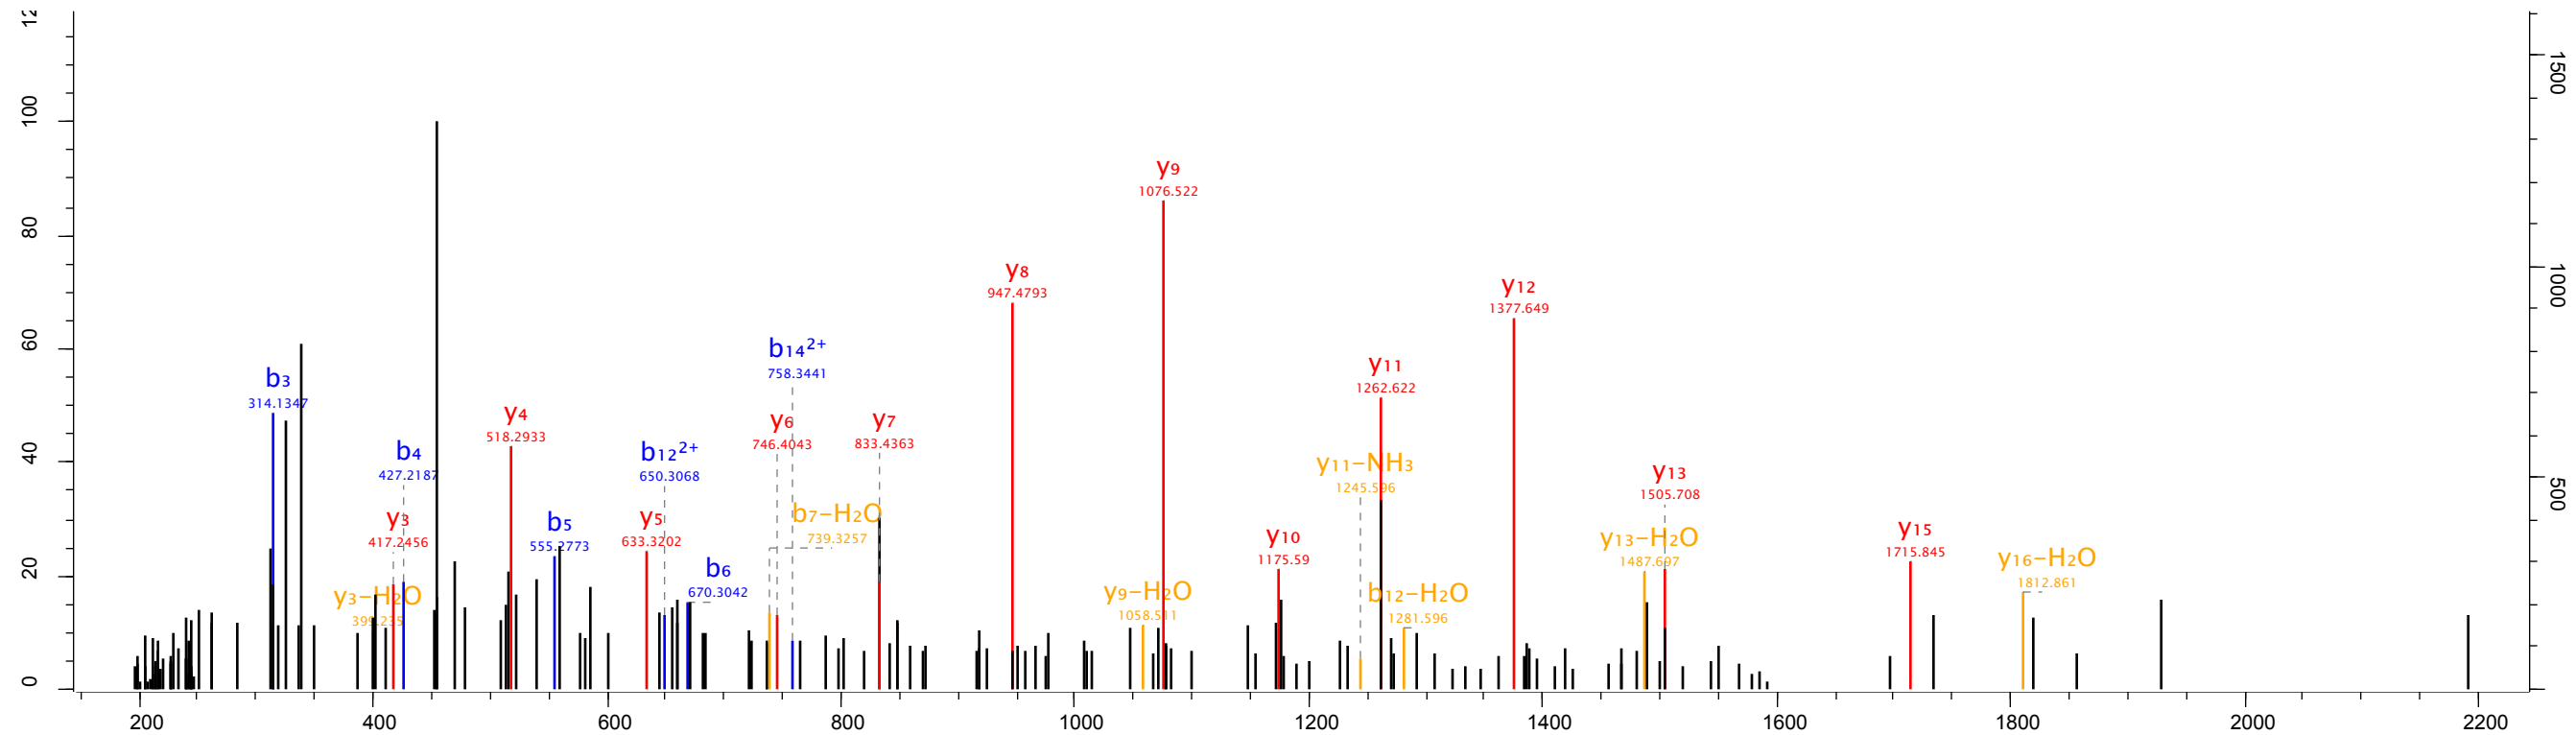

Raw file

UPS1+500ngY\_90minTop17\_BC4\_01\_358

|       |          |       |         |            |
|-------|----------|-------|---------|------------|
| Scan  | Method   | Score | Mass    | Gene names |
| 52783 | TOF; CID | 39.9  | 2103.93 | IES2       |

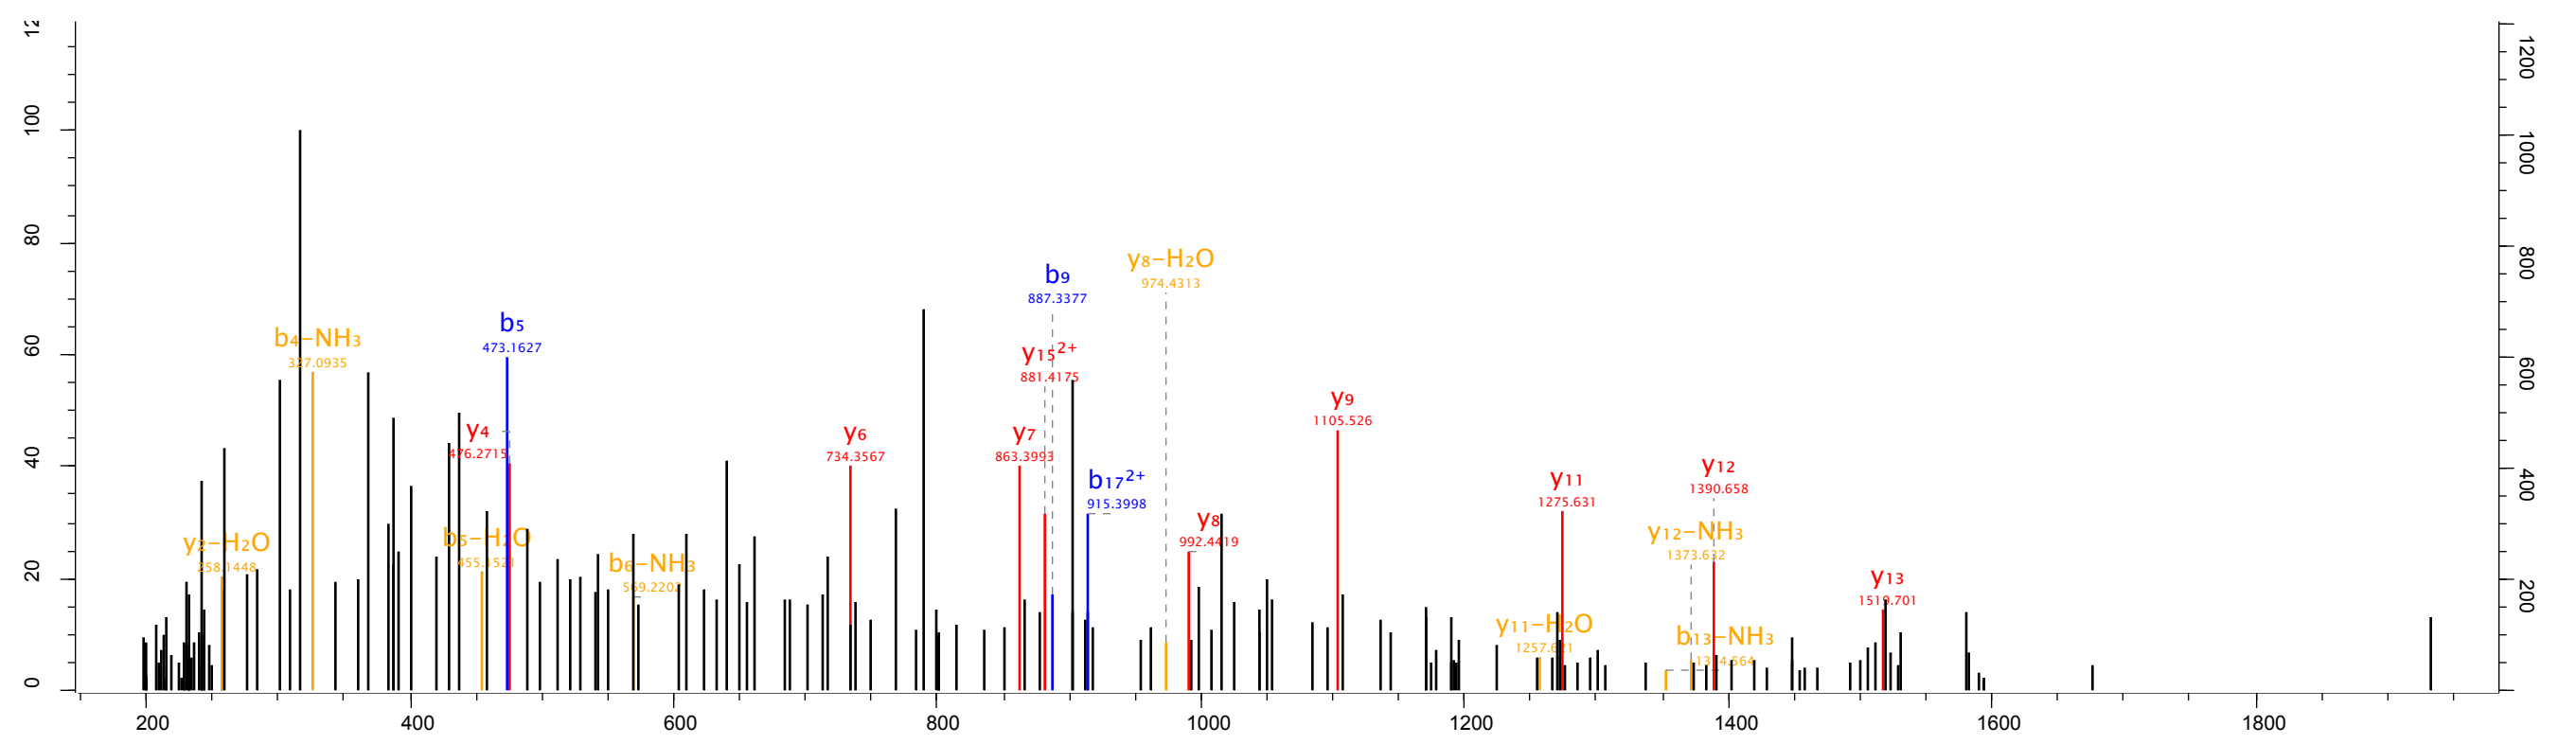

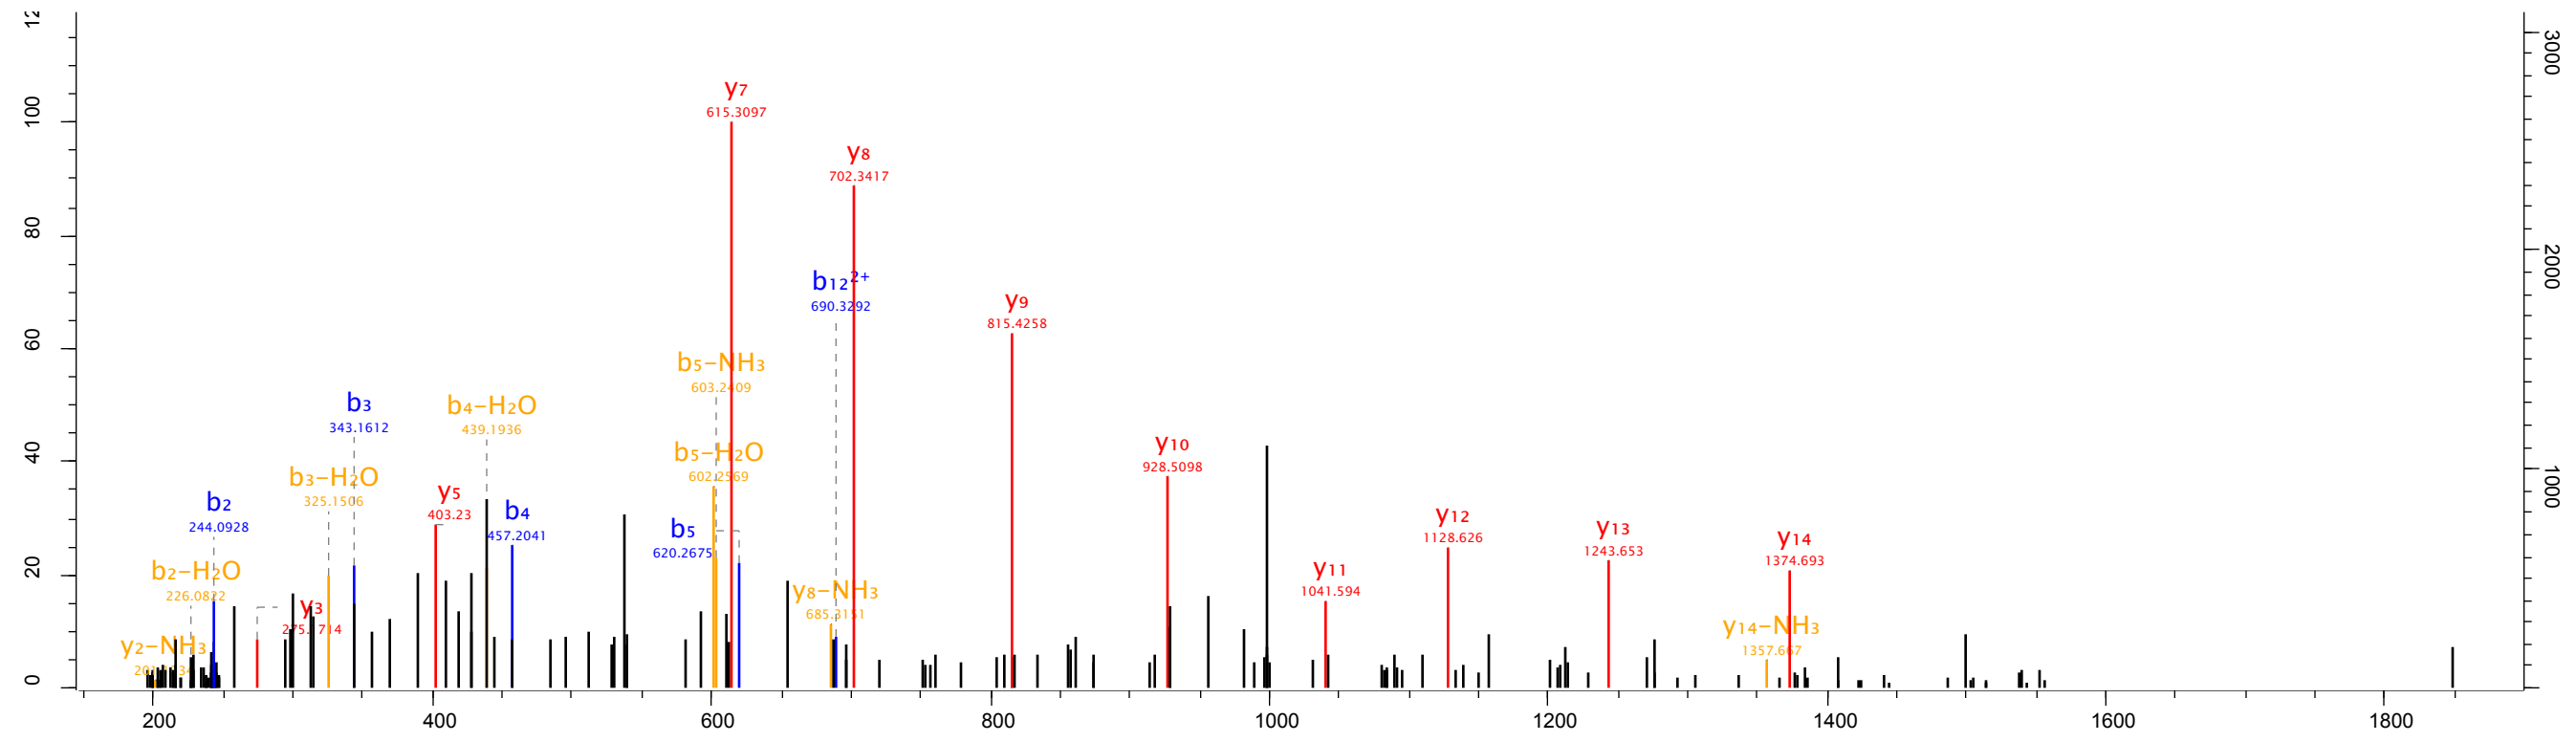

Raw file  
UPS1+500ngY\_90minTop17\_BC4\_01\_358  
Scan: 53158 Method: TOF; CID Score: 84.03 Mass: 2504.21 Gene names: RNQ1

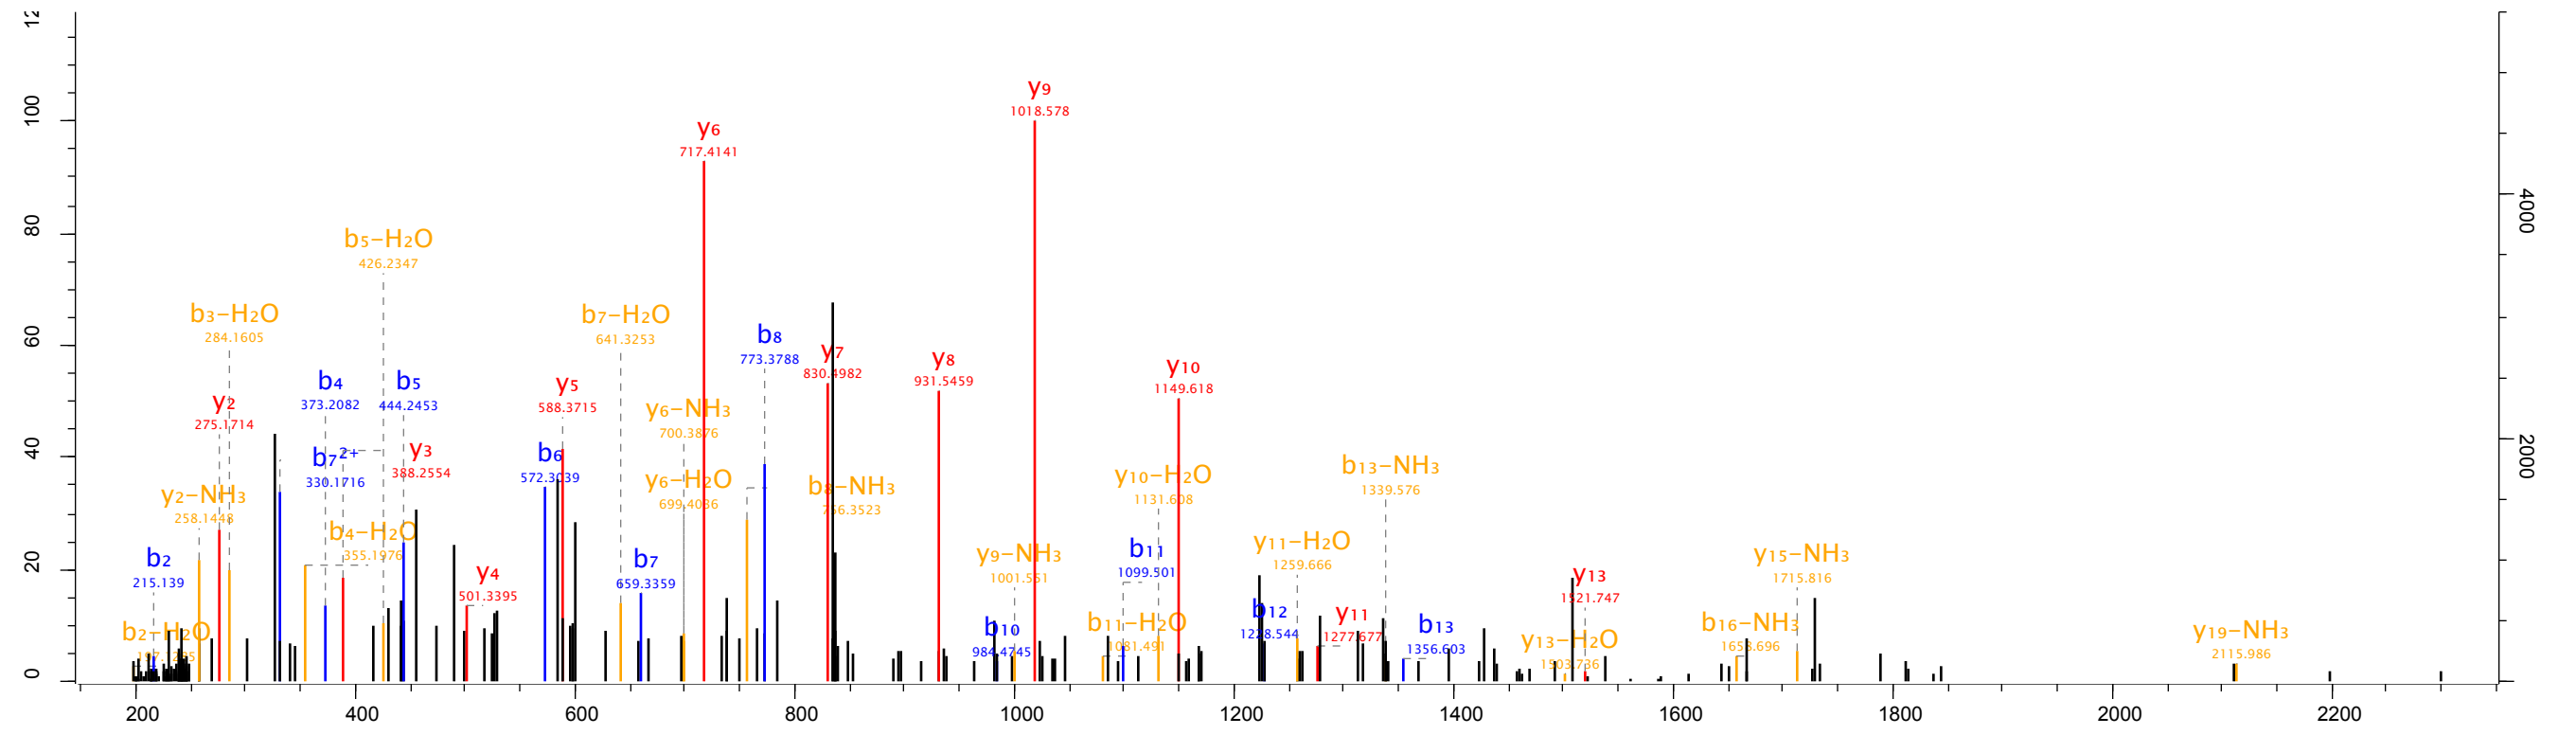

Raw file

UPS1+500ngY\_90minTop17\_BC4\_01\_358

| Scan  | Method   | Score | Mass    | Gene names |
|-------|----------|-------|---------|------------|
| 53331 | TOF; CID | 77.51 | 1793.91 | VCX1       |

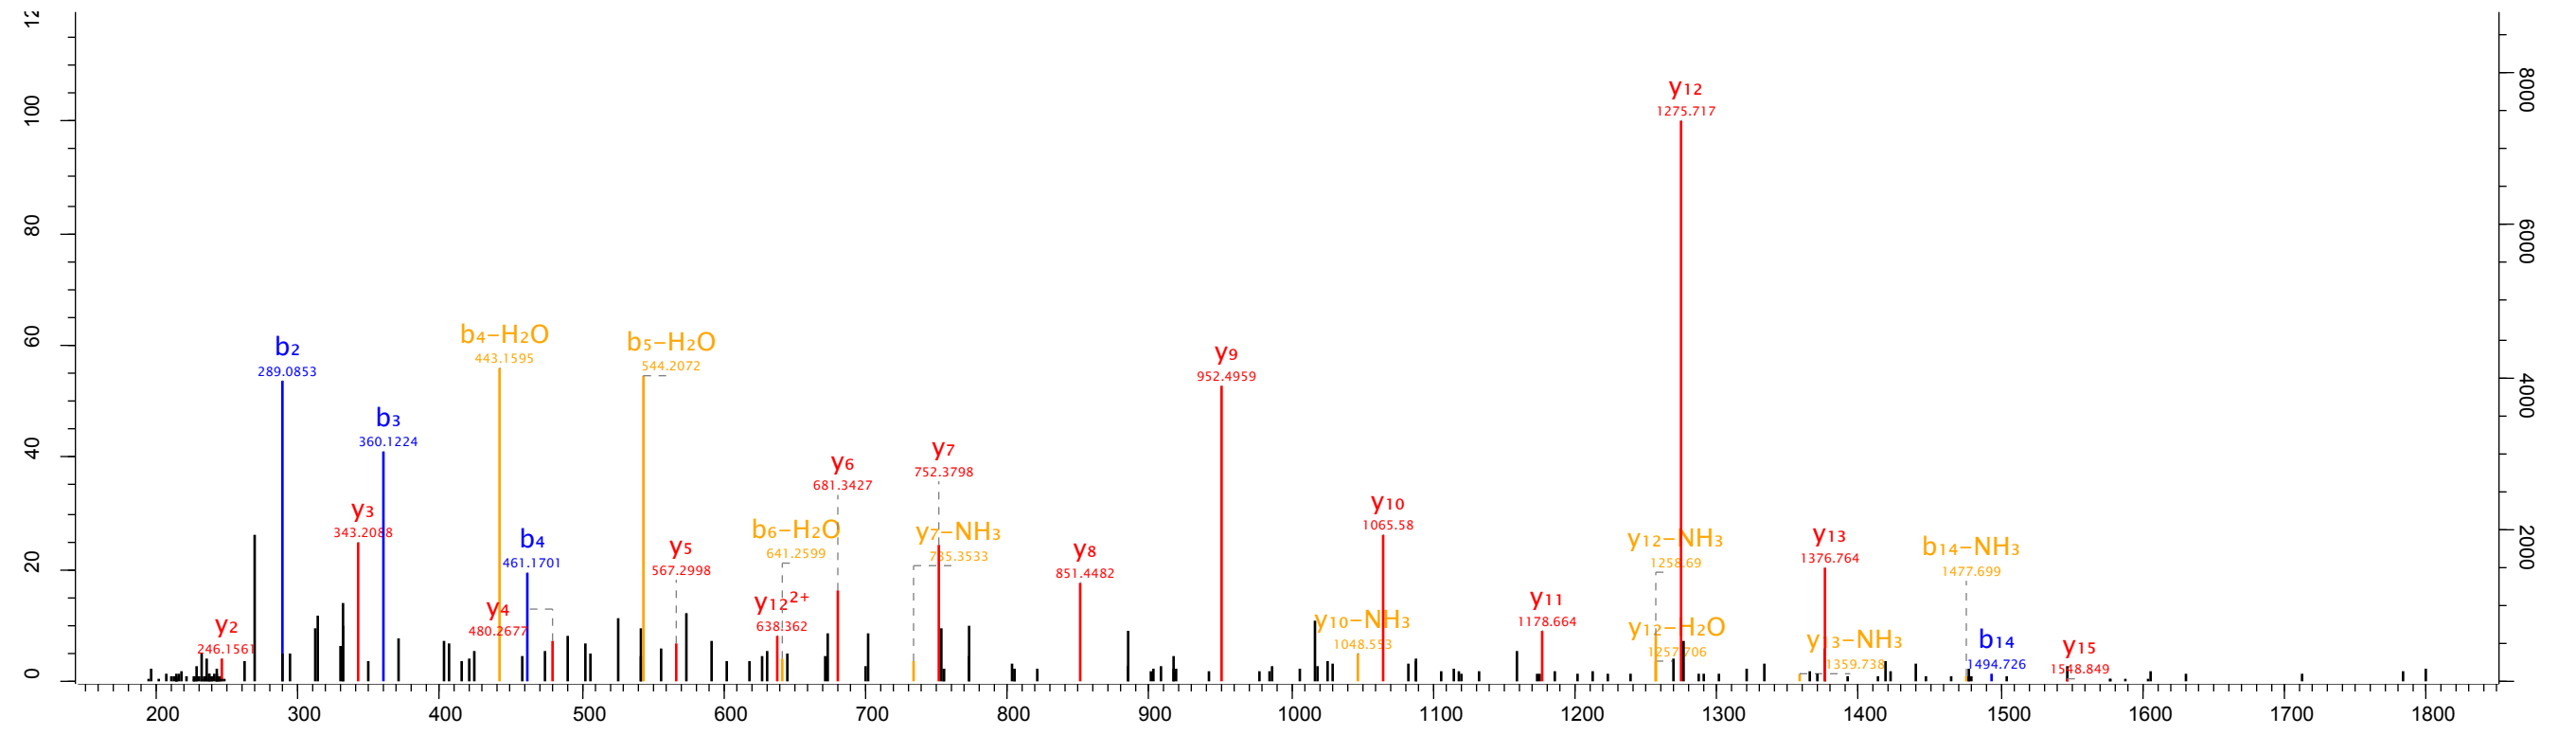

Raw file  
UPS1+500ngY\_90minTop17\_BC4\_01\_358

Scan 53421 Method TOF; CID Score 51.29 Mass 1249.67 Gene names KTII2

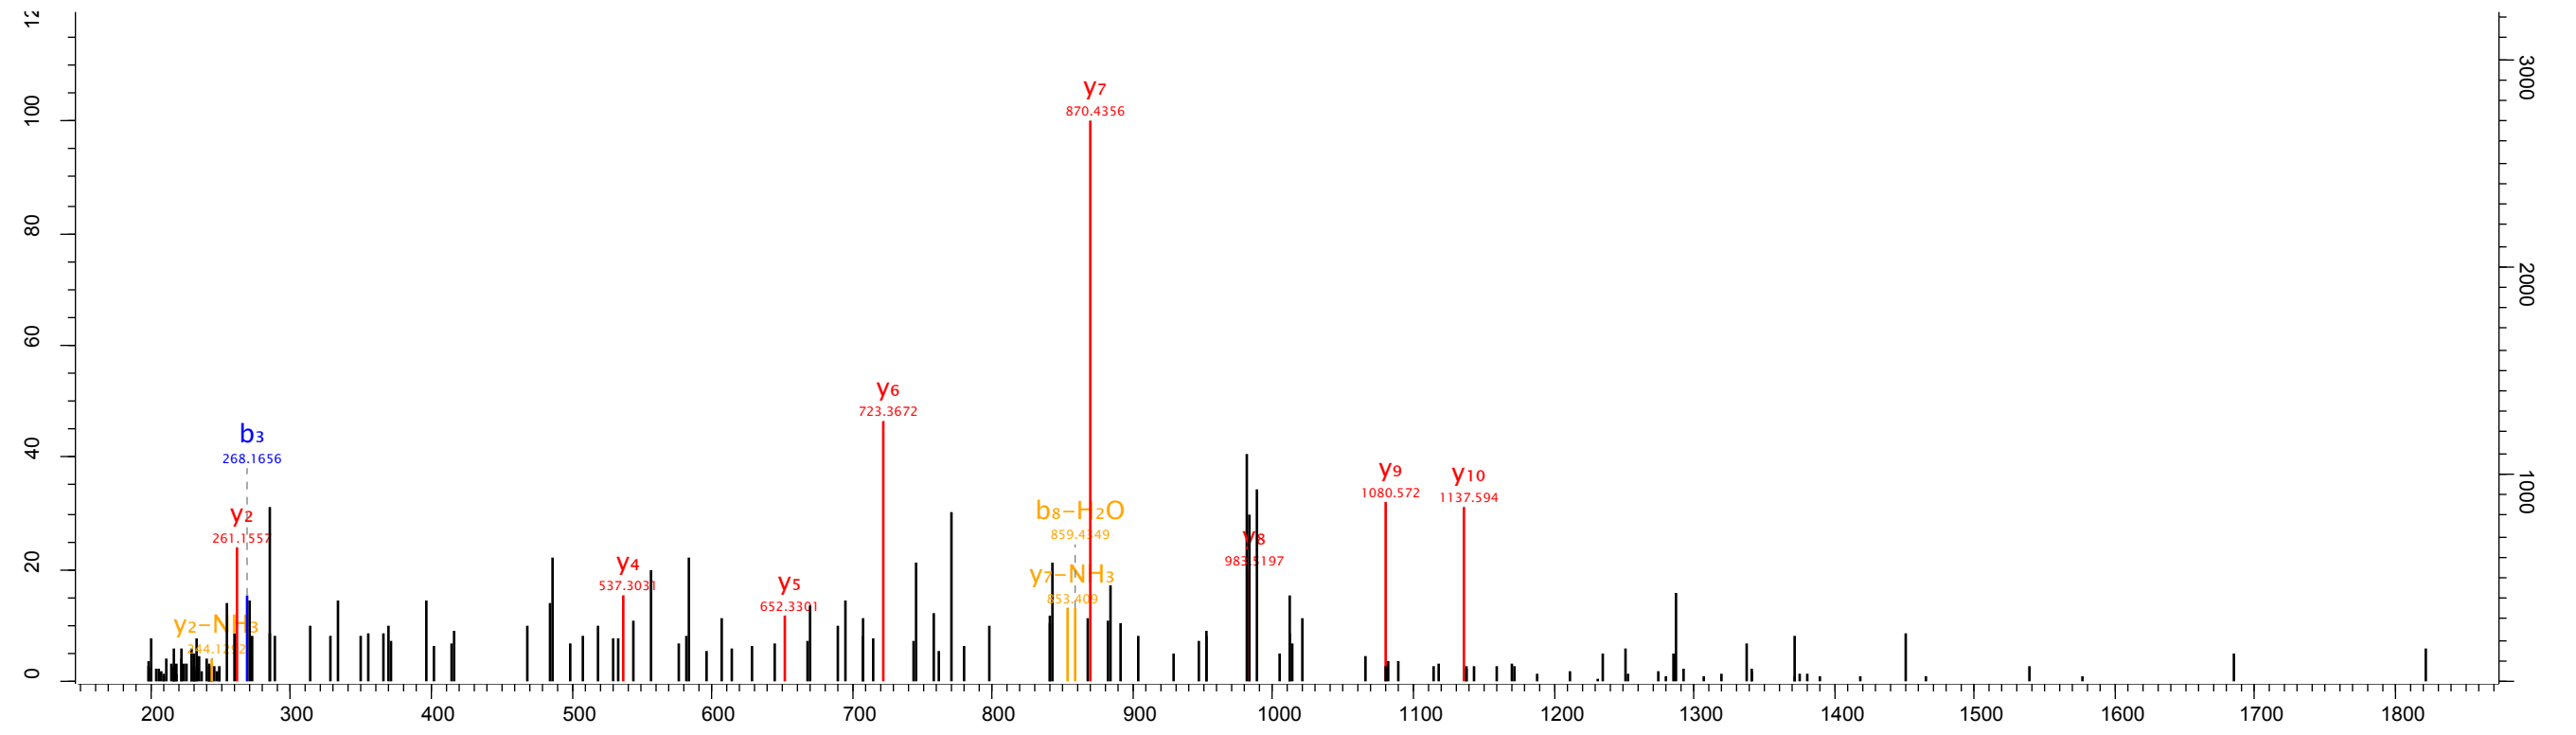

Raw file  
UPS1+500ngY\_90minTop17\_BC4\_01\_358

Scan 53457 Method TOF; CID Score 46.42 Mass 2317.99

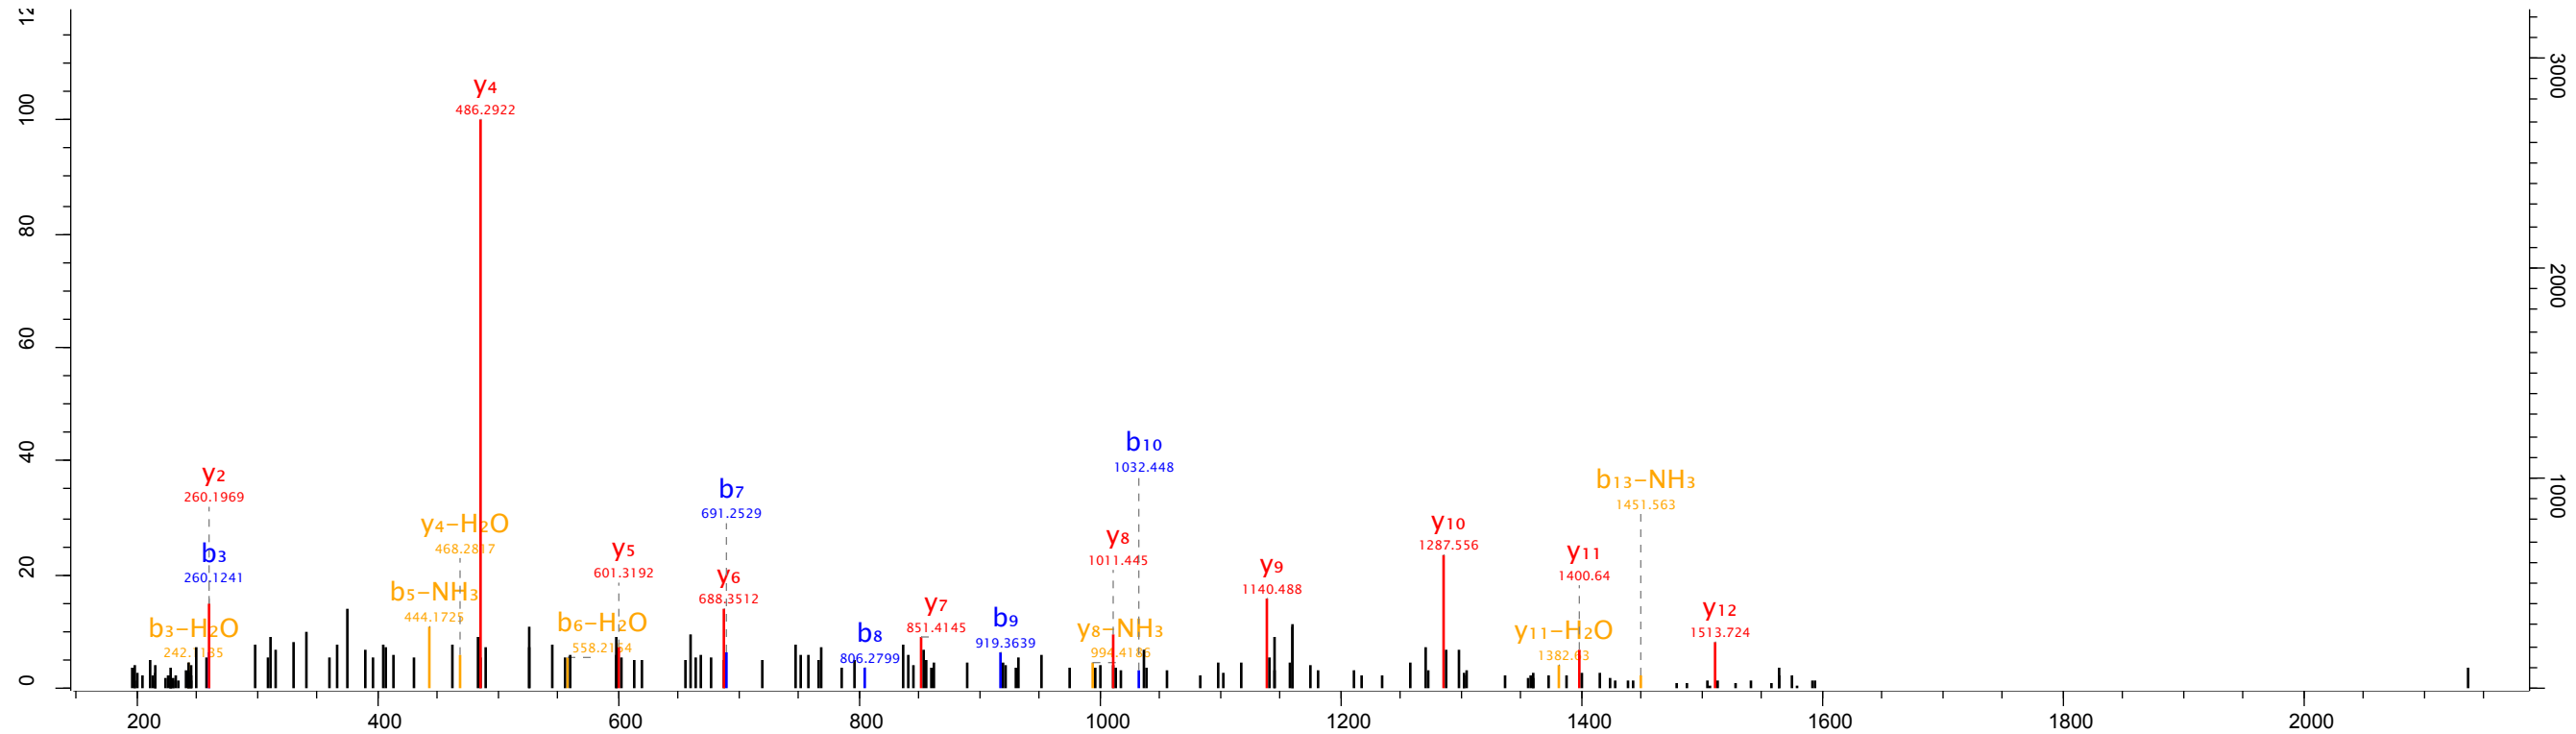



Raw file

UPS1+500ngY\_90minTop17\_BC4\_01\_358

| Scan  | Method   | Score | Mass   | Gene names |
|-------|----------|-------|--------|------------|
| 53525 | TOF; CID | 70    | 882.49 | SRP54      |

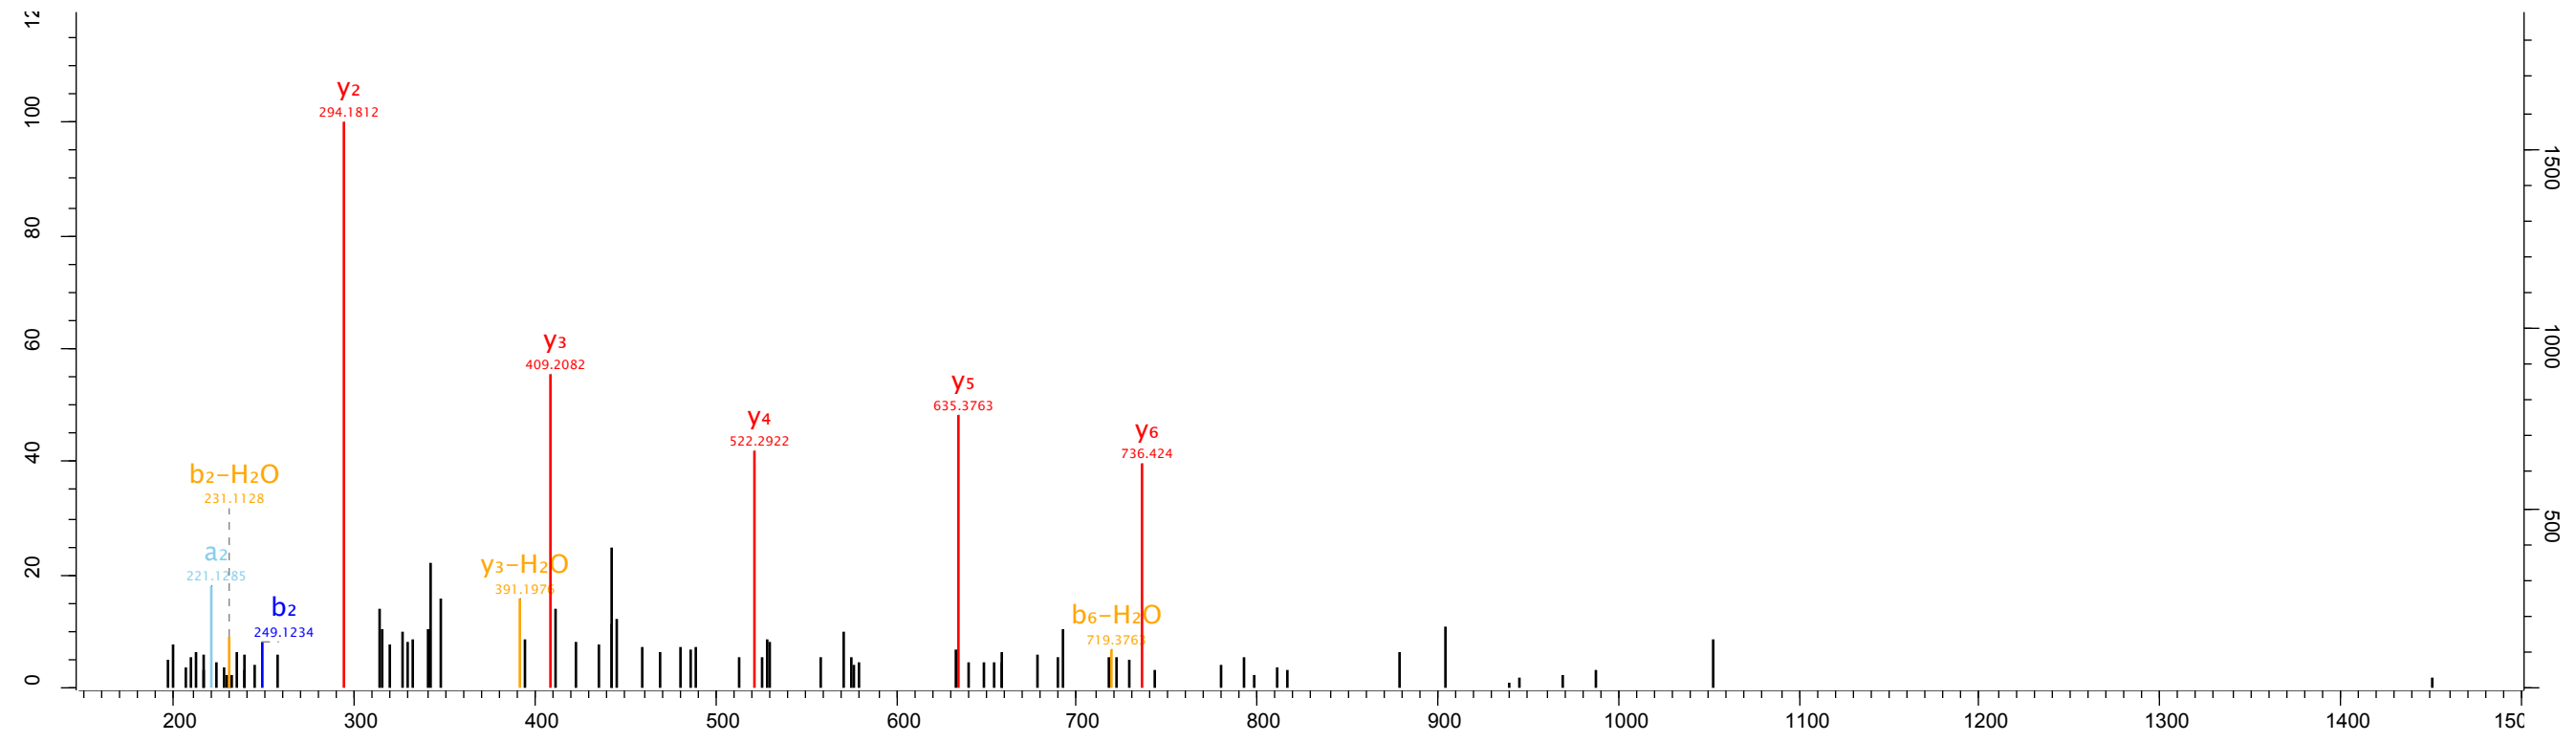

Raw file  
UPS1+500ngY\_90minTop17\_BC4\_01\_358

Scan 53968 Method TOF; CID Score 52.86 Mass 1941.92

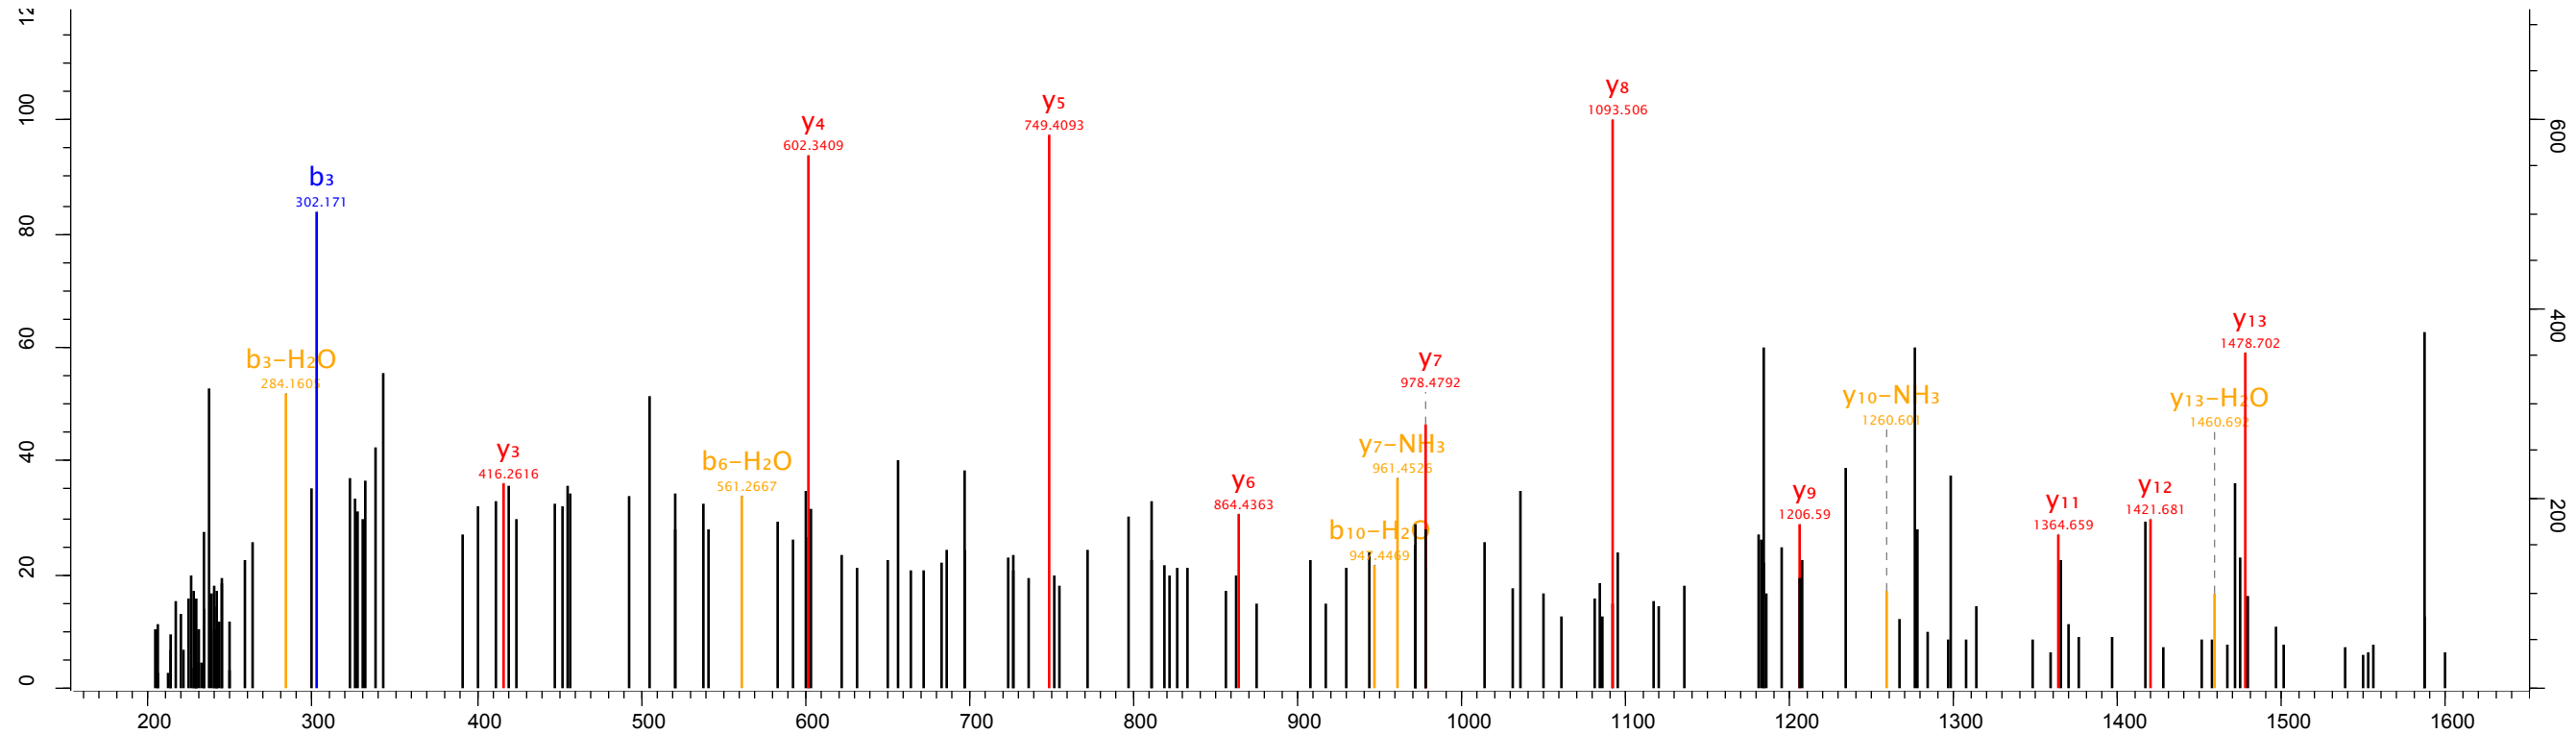

Raw file  
UPS1+500ngY\_90minTop17\_BC4\_01\_358

Scan: 54089  
Method: TOF; CID  
Score: 53.3  
Mass: 1547.75  
Gene names: CBC2

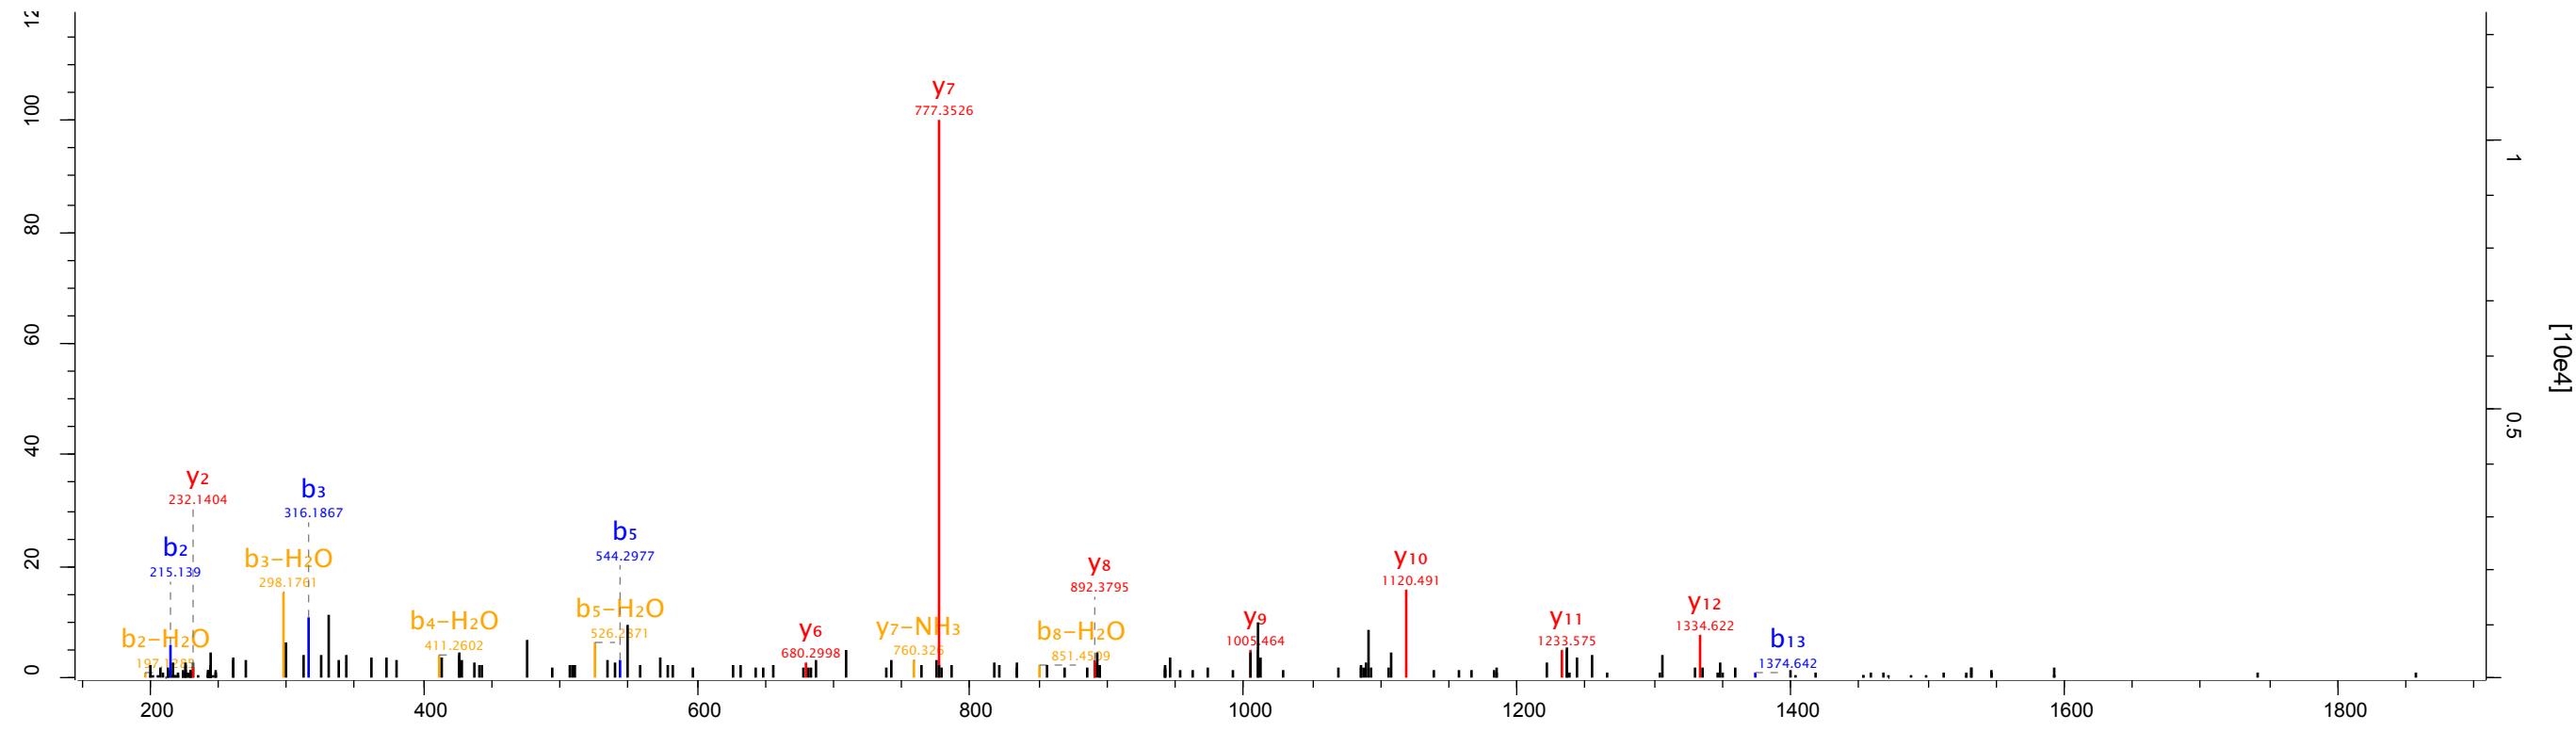

Raw file  
UPS1+500ngY\_90minTop17\_BC4\_01\_358

Scan Method Score Mass Gene names  
54294 TOF; CID 124.2 1945.96 ADE8

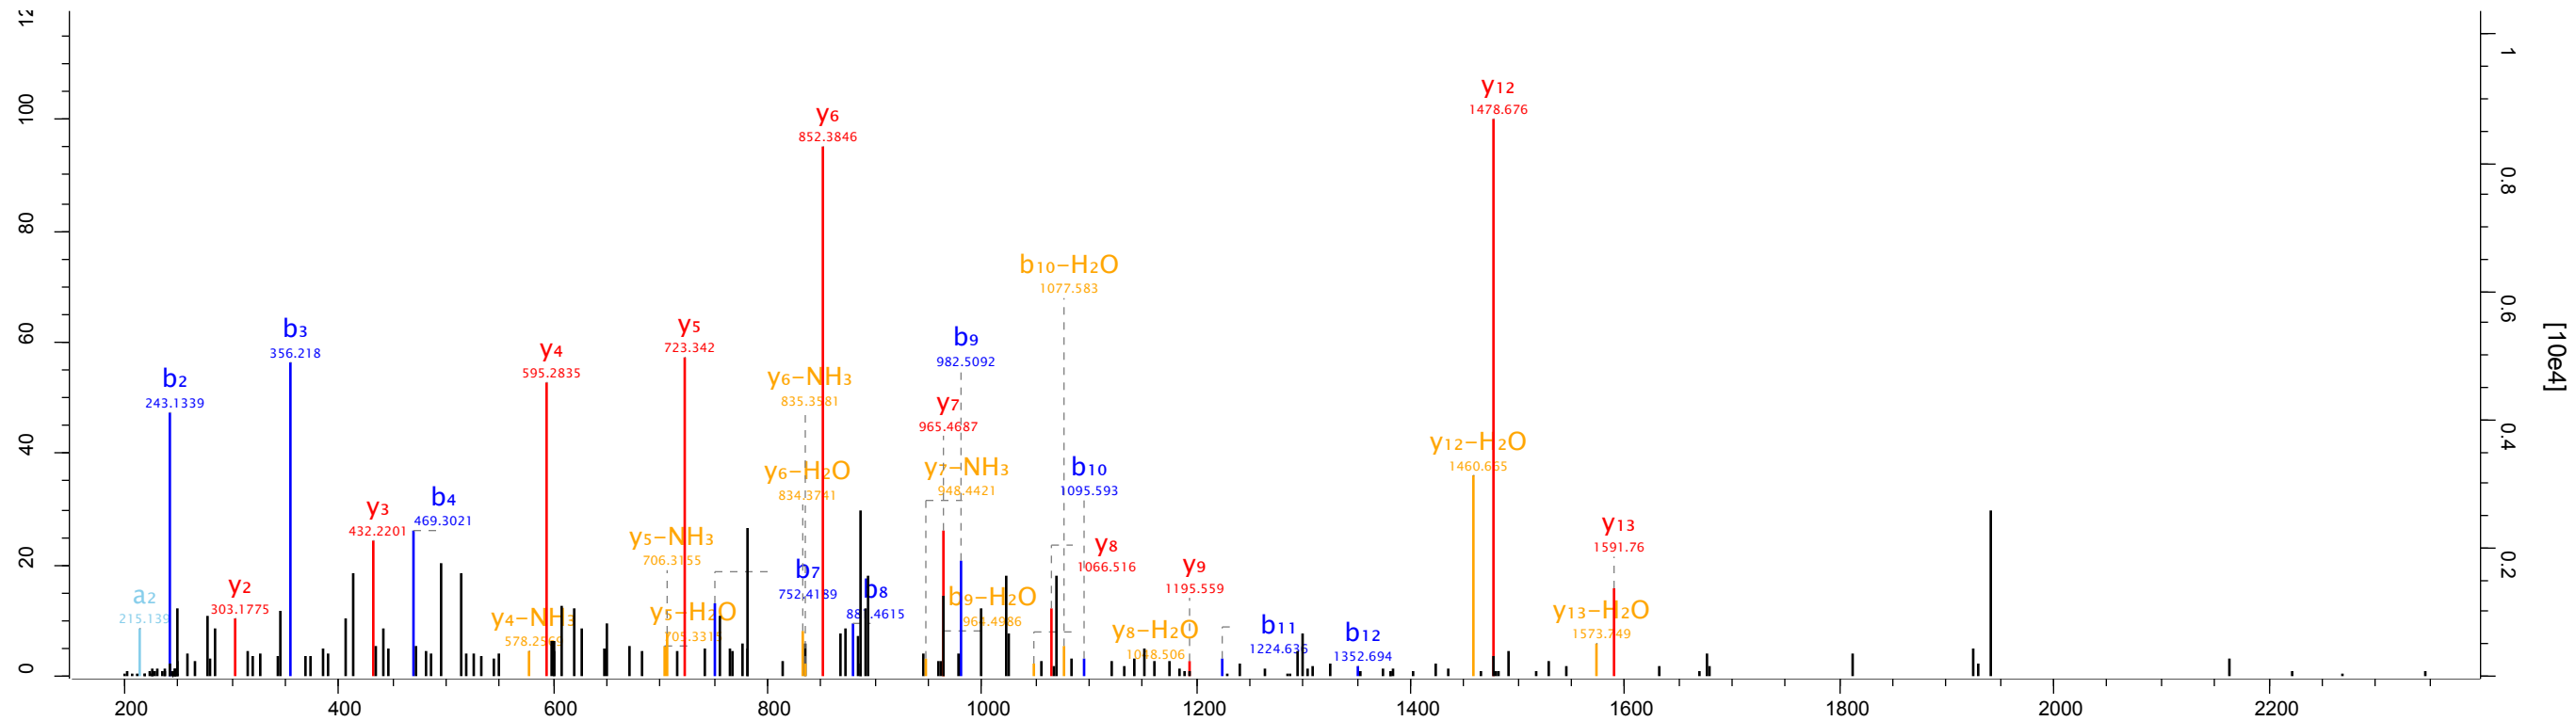

Raw file  
UPS1+500ngY\_90minTop17\_BC4\_01\_358

Scan: 54635  
Method: TOF; CID  
Score: 83.14  
Mass: 1427.71  
Gene names: GLO1

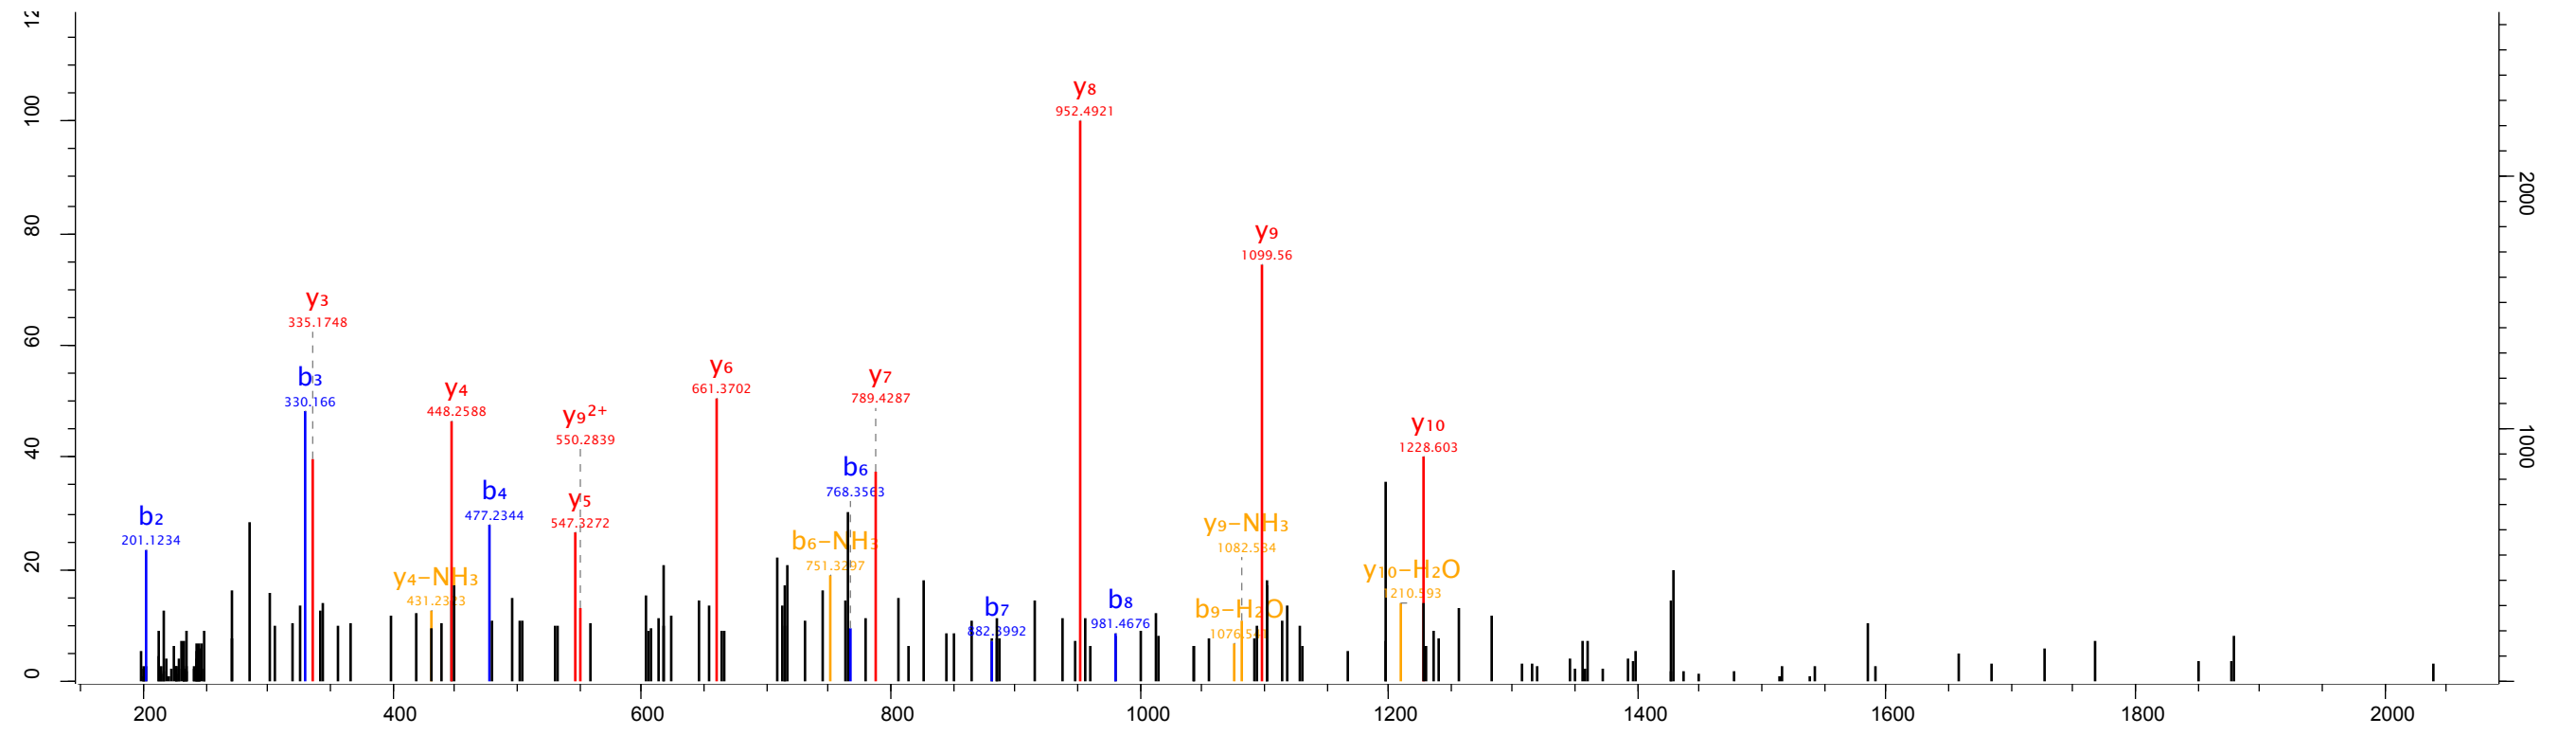

Raw file

UPS1+500ngY\_90minTop17\_BC4\_01\_358

| Scan  | Method   | Score | Mass    | Gene names |
|-------|----------|-------|---------|------------|
| 55289 | TOF; CID | 44.86 | 1121.54 | TMT1       |

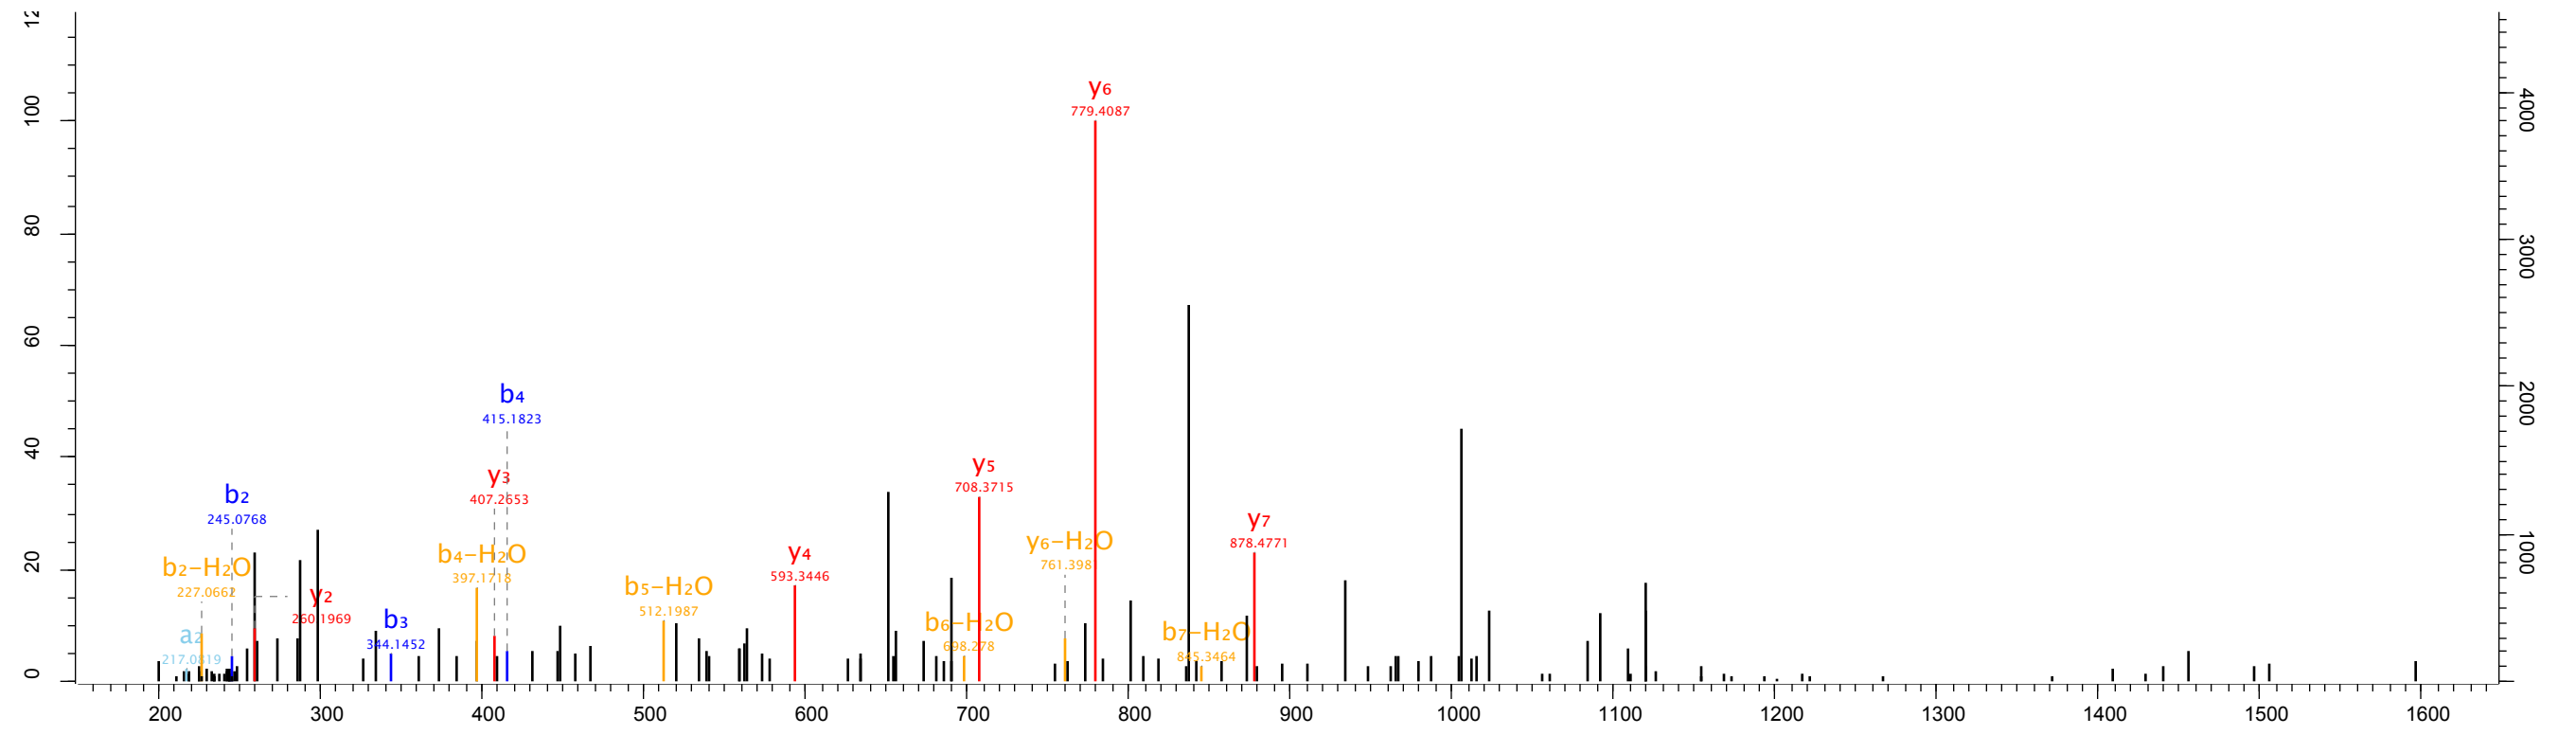

Raw file

UPS1+500ngY\_90minTop17\_BC4\_01\_358

Scan: 55296  
Method: TOF; CID  
Score: 77.51  
Mass: 2089.07  
Gene names: CBP4

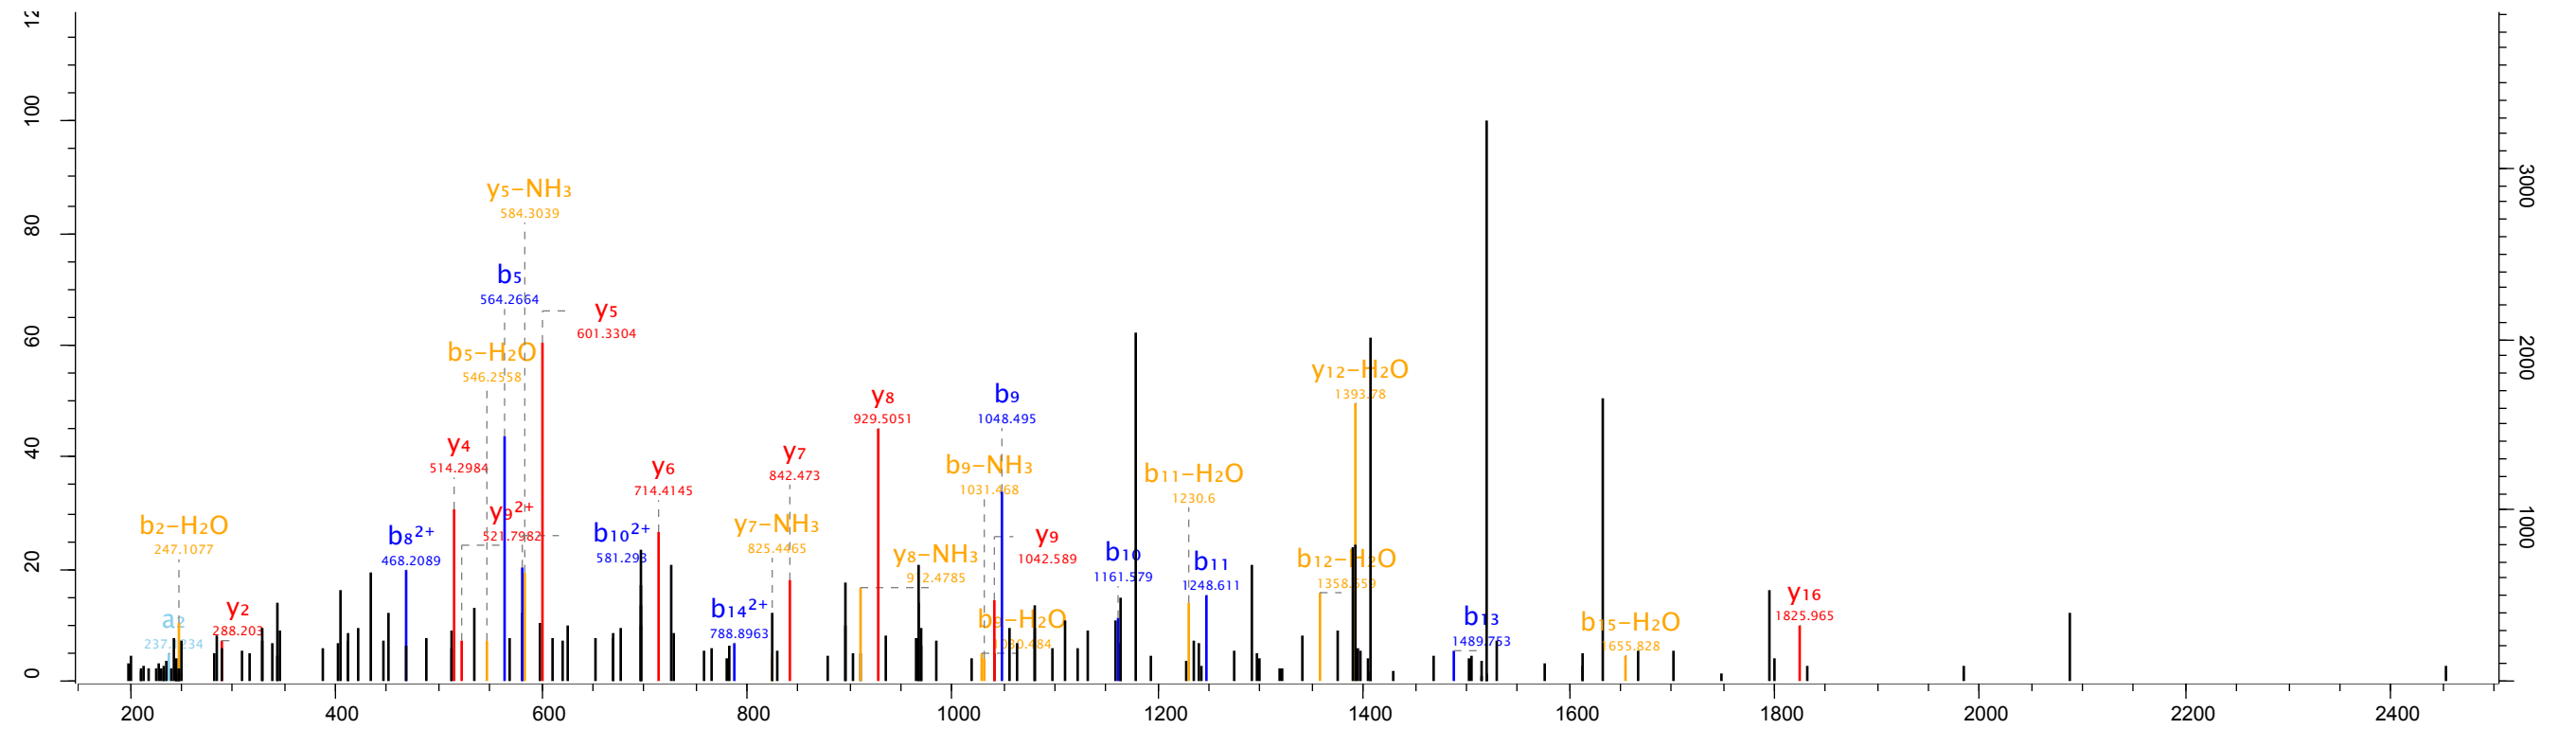

Raw file  
 UPS1+500ngY\_90minTop17\_BC4\_01\_358  
 Scan: 55488 Method: TOF; CID Score: 200.29 Mass: 2408.39 Gene names: HTA2;HTA1

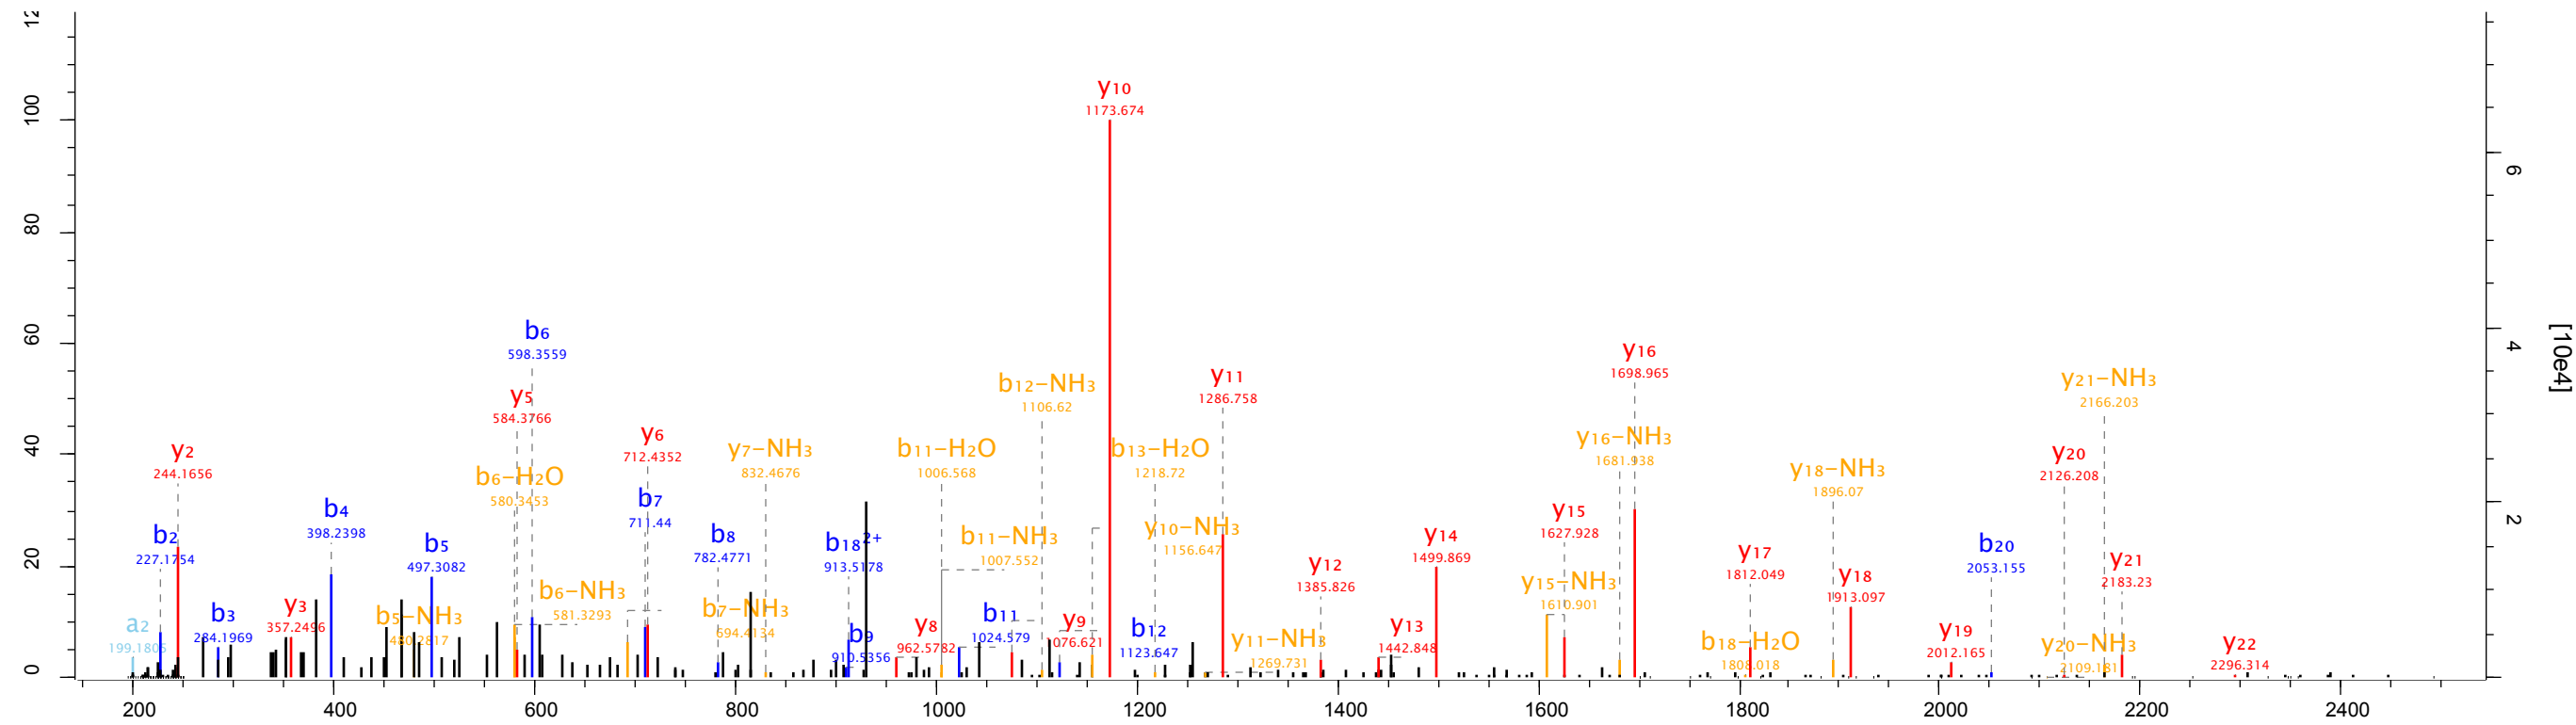



Raw file  
UPS1+500ngY\_90minTop17\_BC4\_01\_358

Scan 55551 Method TOF; CID Score 47.77 Mass 1552.78 Gene names PPA2

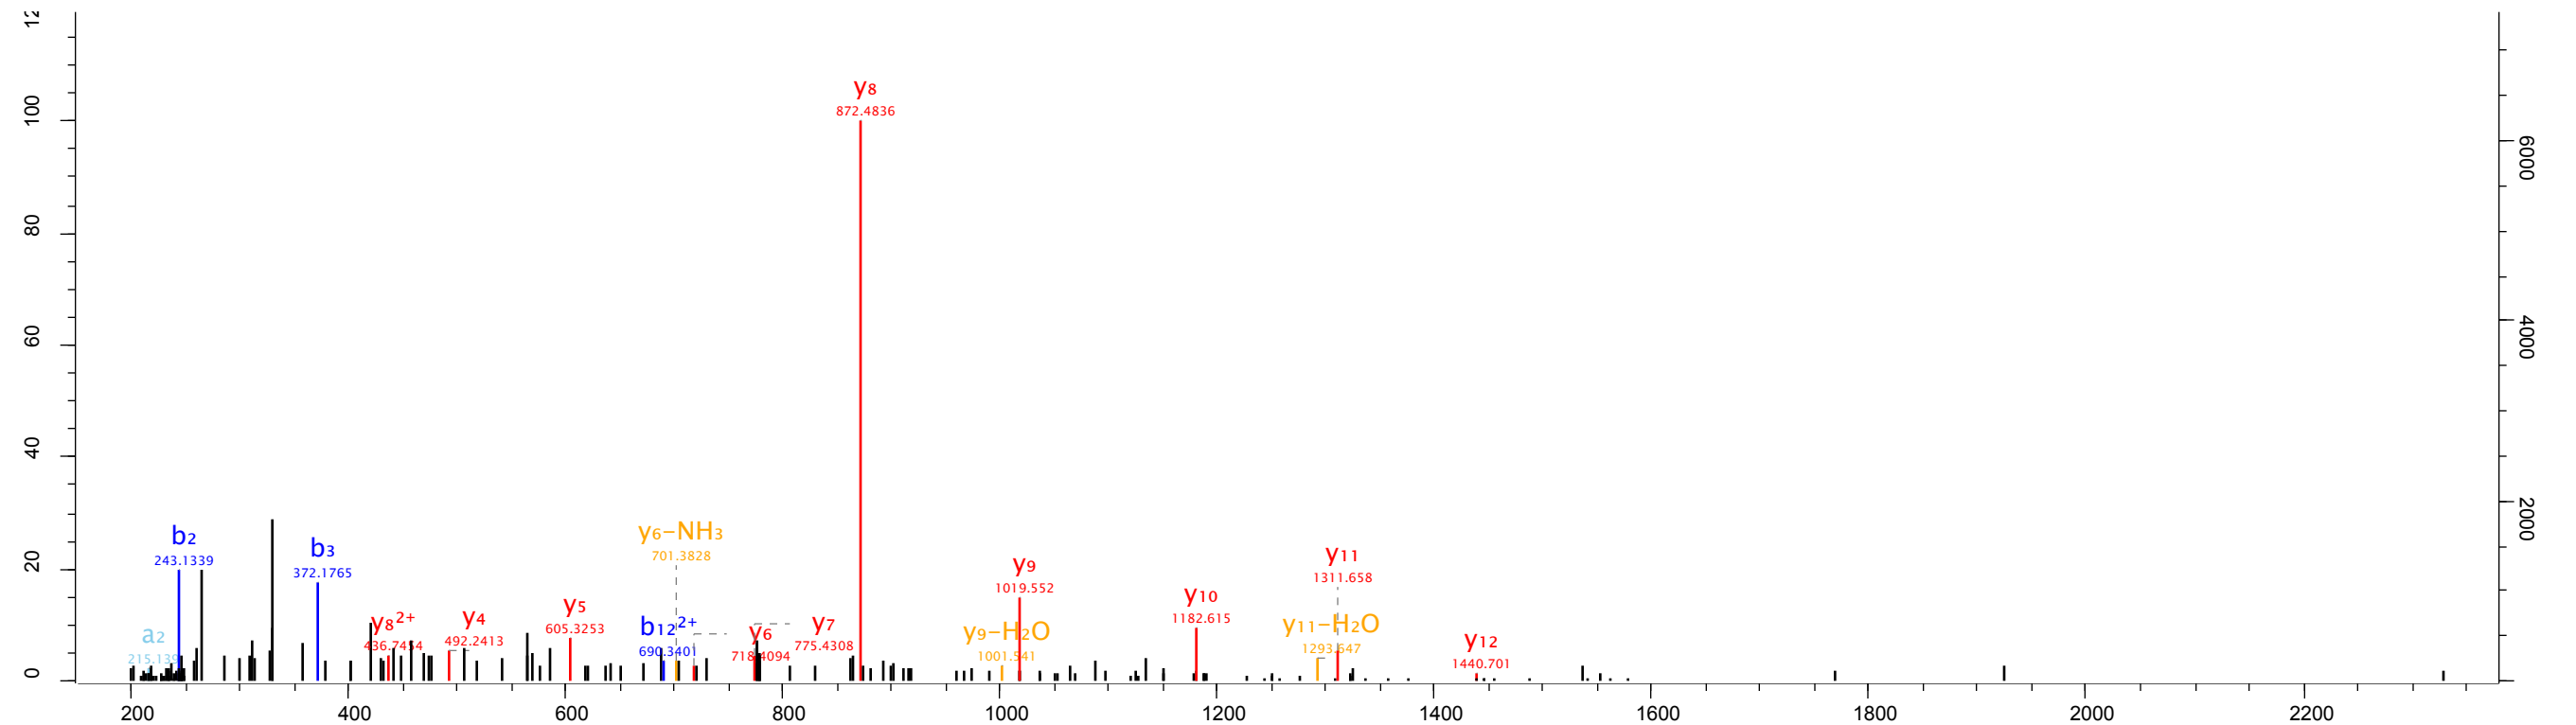

|           | Raw file                          | Scan  | Method   | Score | Mass    |
|-----------|-----------------------------------|-------|----------|-------|---------|
| peptide 1 | UPS1+500ngY_90minTop17_BC4_01_358 | 55577 | TOF; CID | 52.07 | 1450.68 |
| peptide 2 | UPS1+500ngY_90minTop17_BC4_01_358 | 55577 | TOF; CID | 41.58 | 1448.72 |

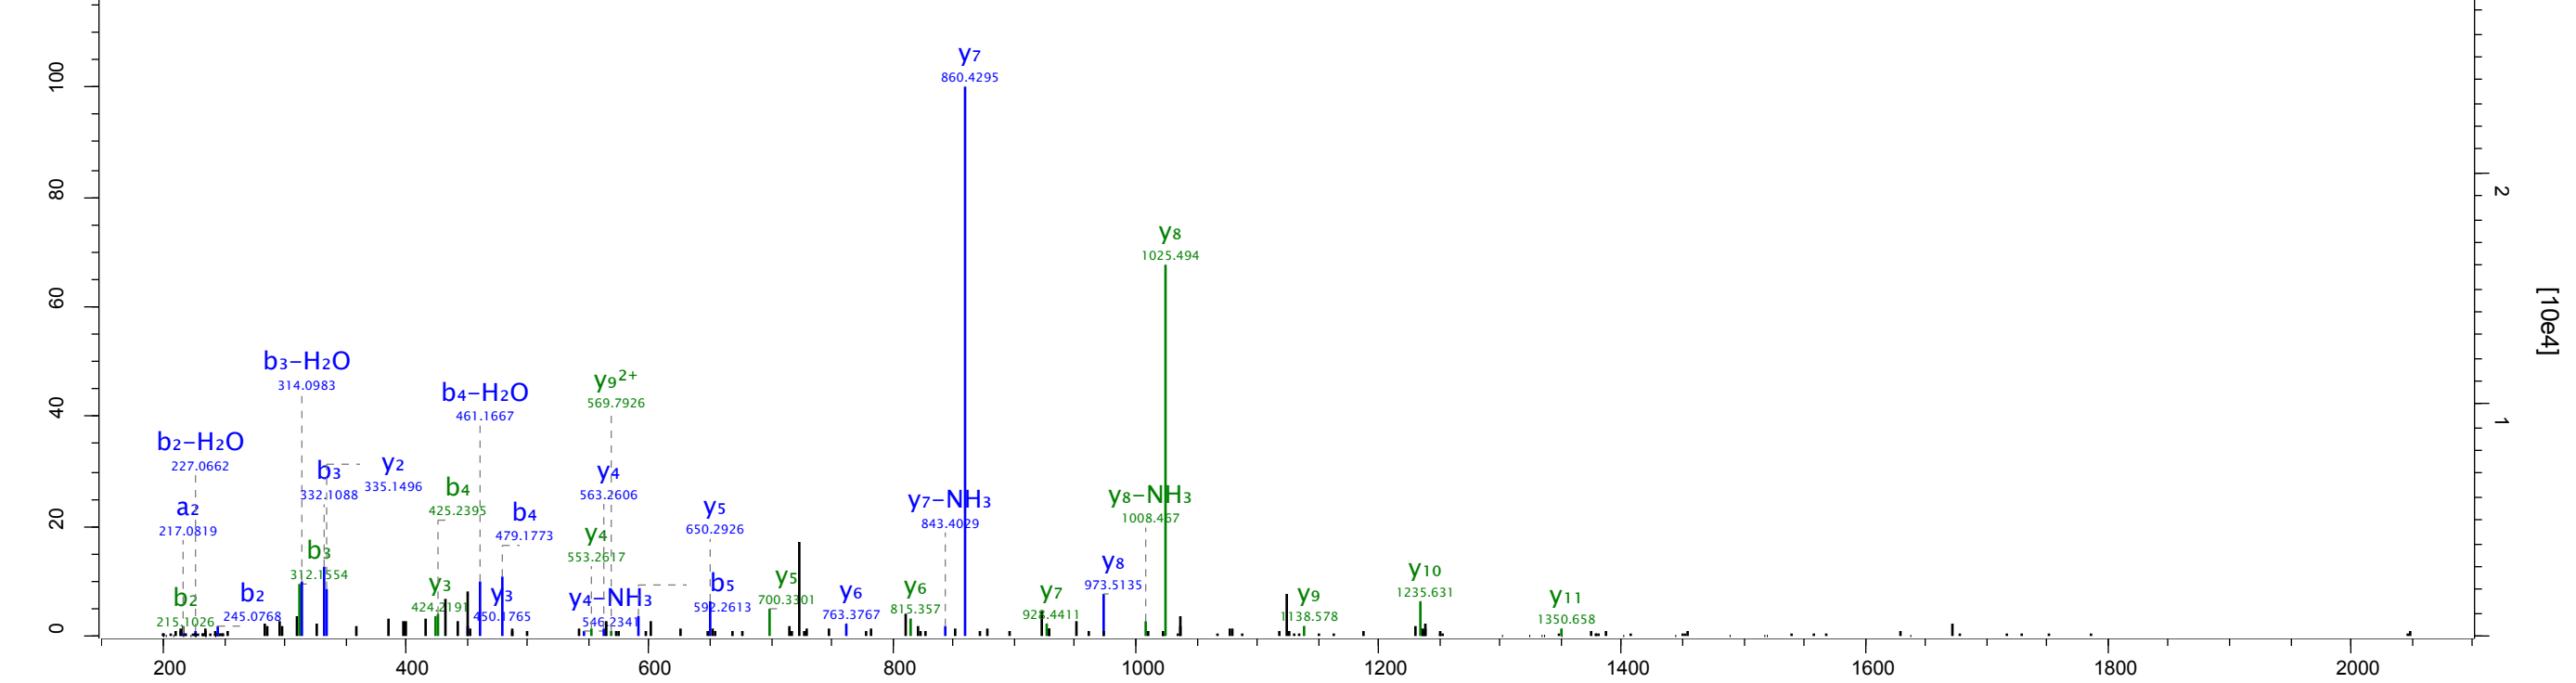

Raw file  
UPS1+500ngY\_90minTop17\_BC4\_01\_358

| Scan  | Method   | Score | Mass   | Gene names |
|-------|----------|-------|--------|------------|
| 56003 | TOF; CID | 51.45 | 996.62 | KAP104     |

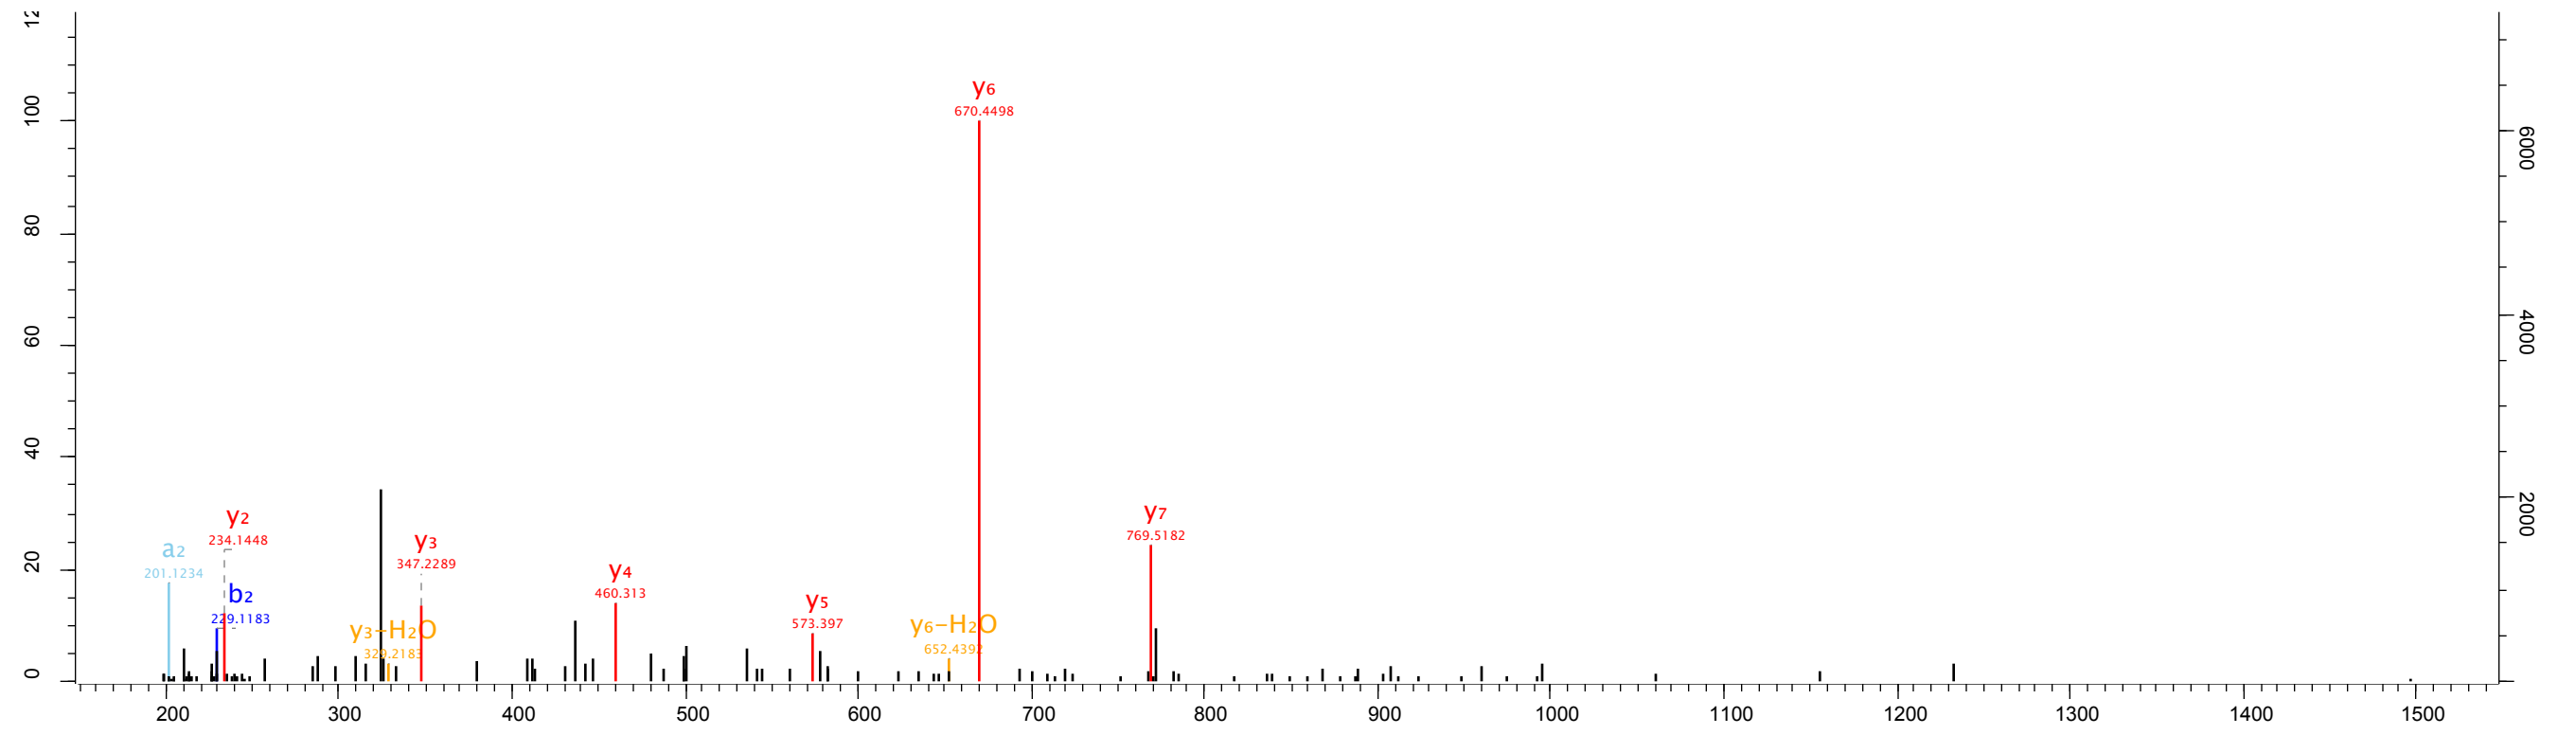

Raw file  
UPS1+500ngY\_90minTop17\_BC4\_01\_358

Scan 56164 Method TOF; CID Score 68.26 Mass 1579.79 Gene names FET5

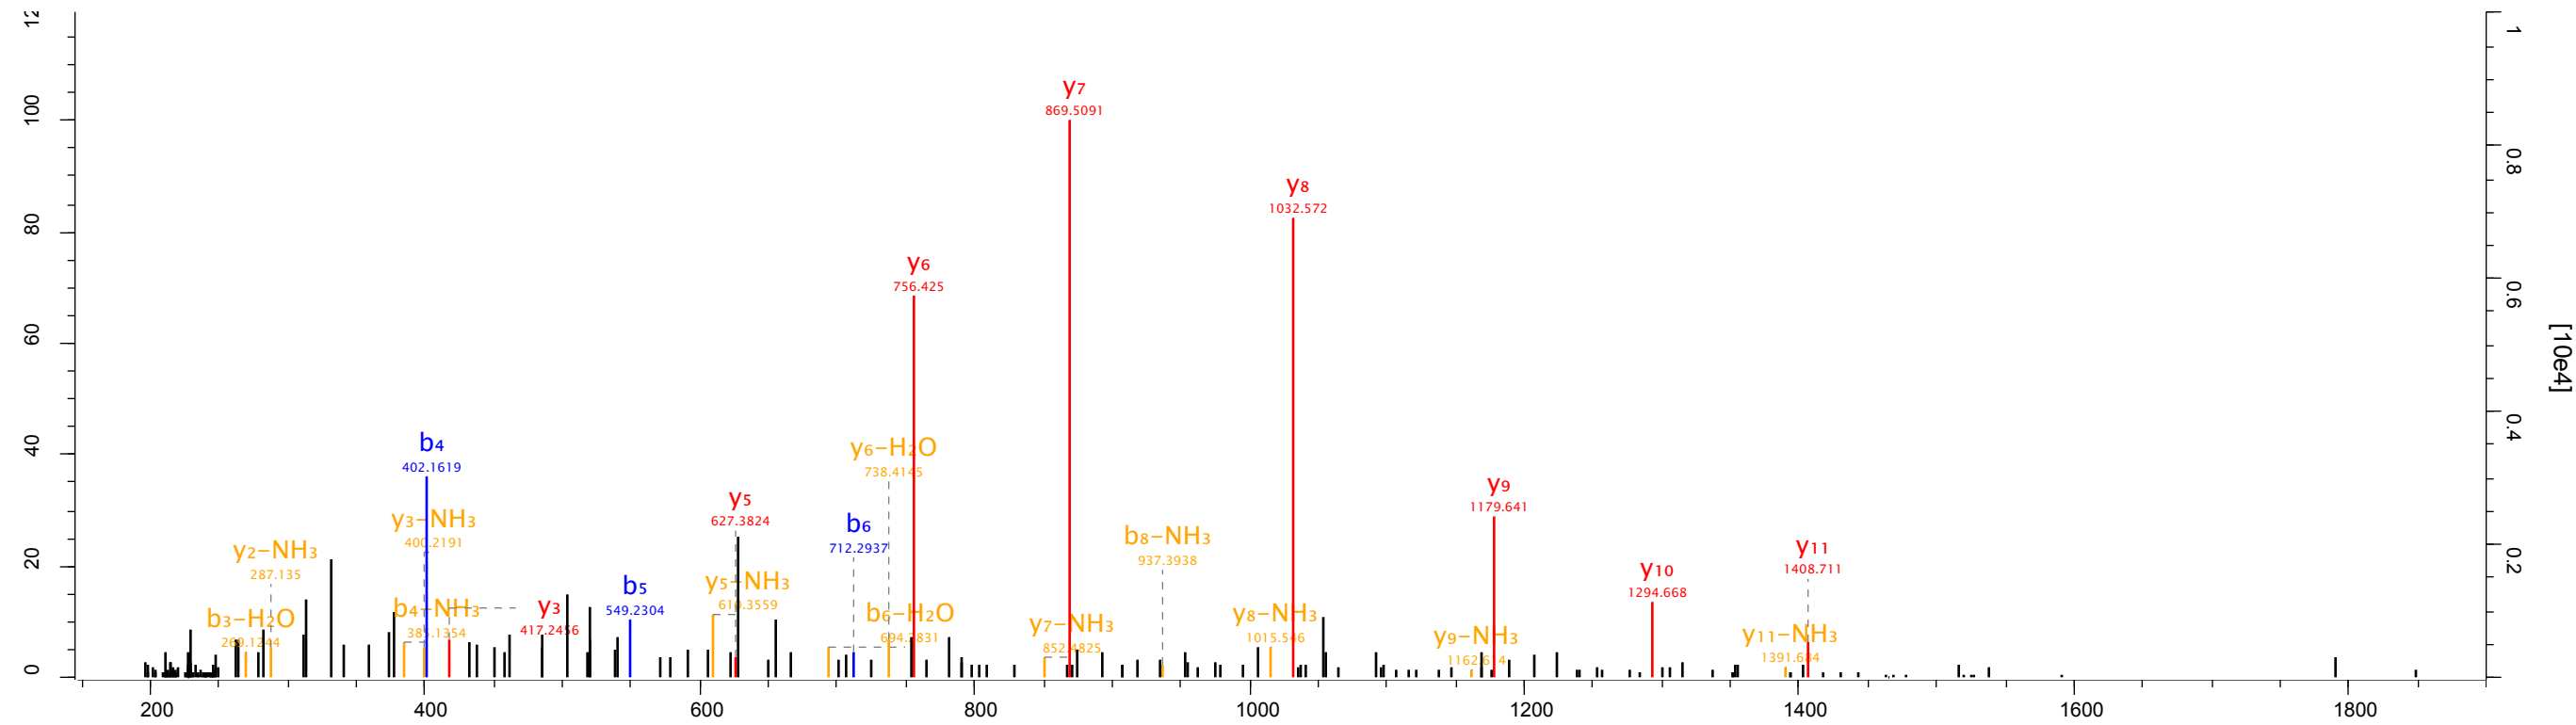

Raw file

UPS1+500ngY\_90minTop17\_BC4\_01\_358

Scan 56312 Method TOF; CID Score 51.5 Mass 1844.89 Gene names UBP3

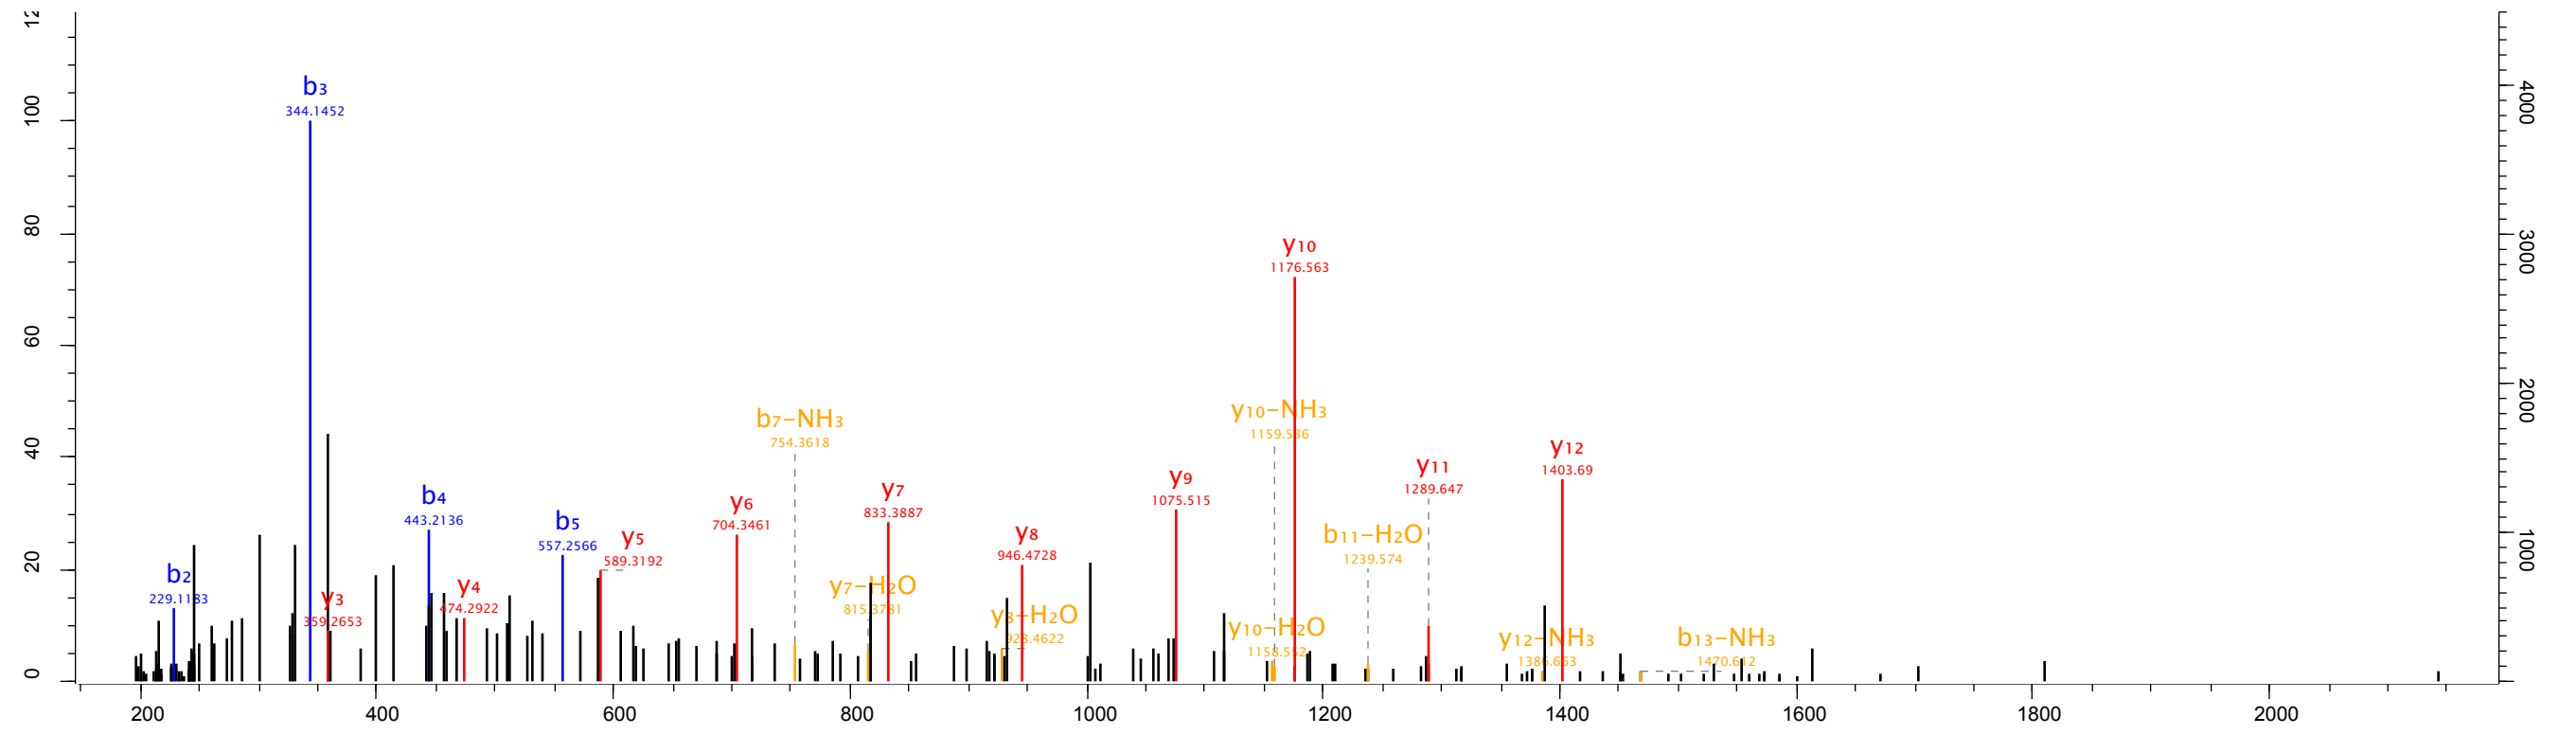

Raw file  
UPS1+500ngY\_90minTop17\_BC4\_01\_358

| Scan  | Method   | Score | Mass   | Gene names |
|-------|----------|-------|--------|------------|
| 56316 | TOF; CID | 88.38 | 1913.9 | TSR2       |

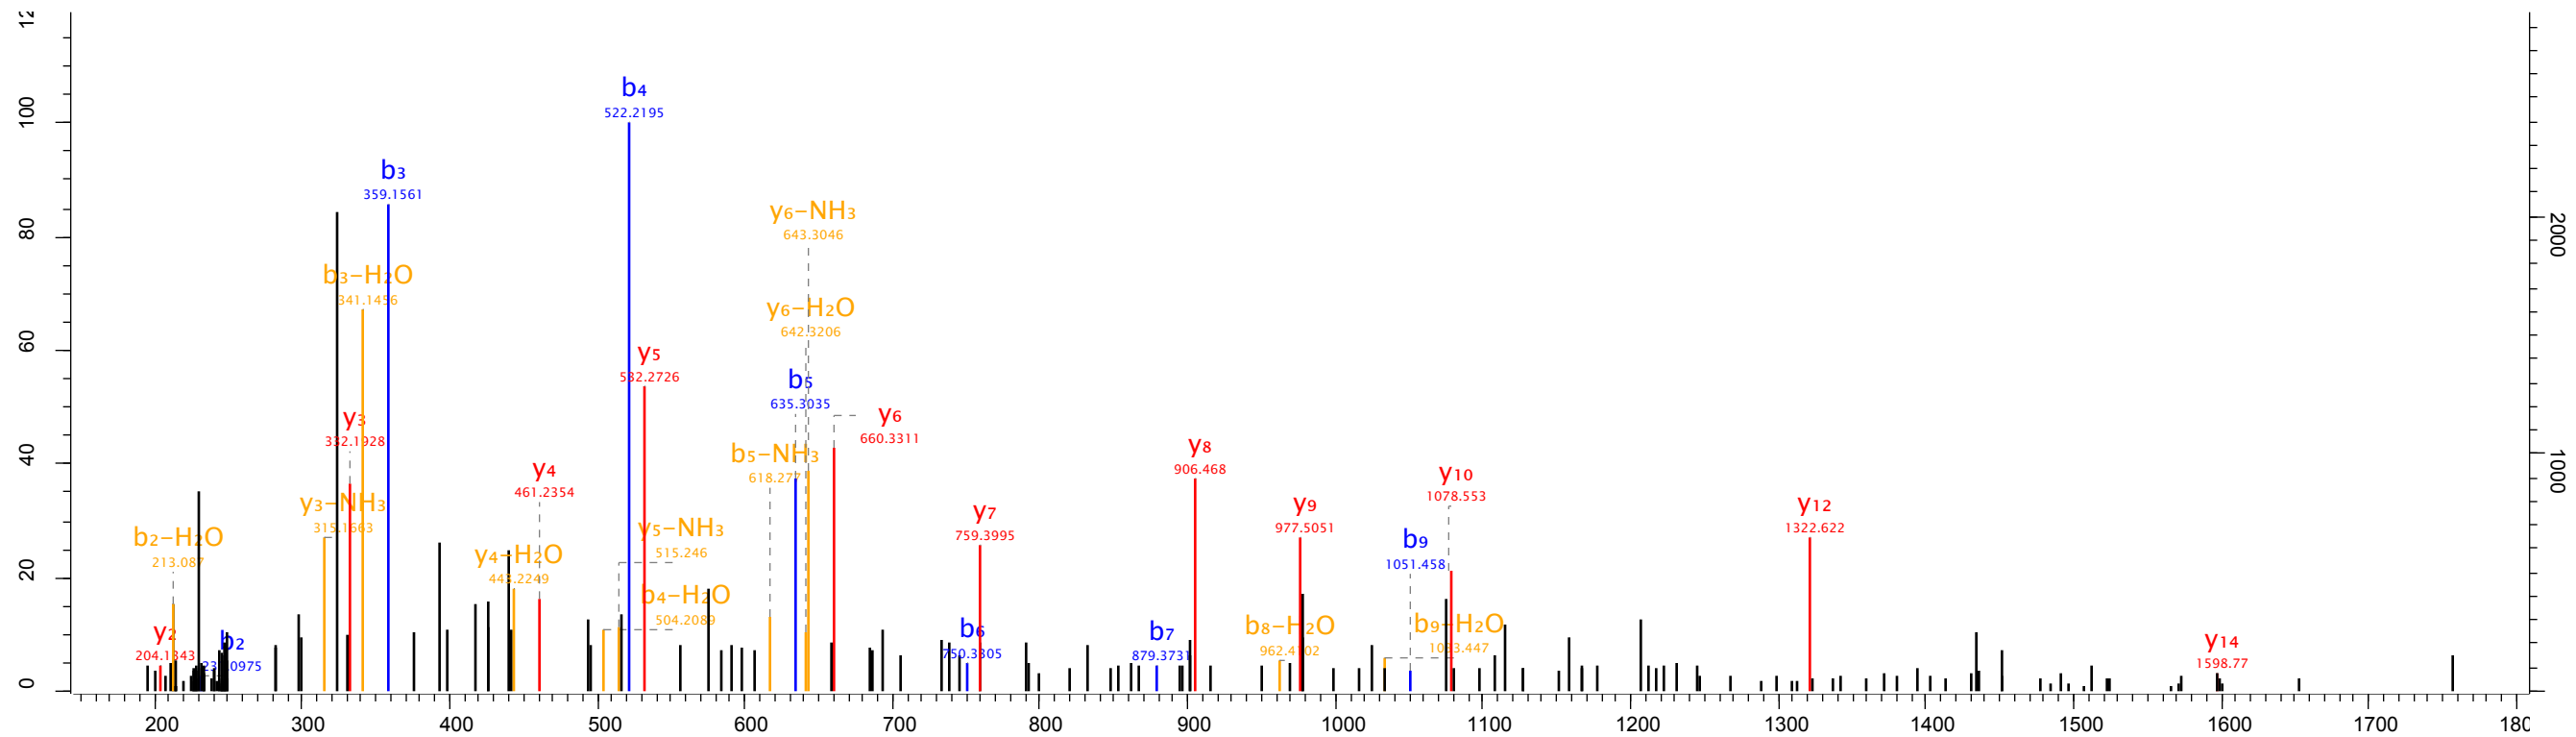

Raw file  
UPS1+500ngY\_90minTop17\_BC4\_01\_358

Scan 56508 Method TOF; CID Score 45.24 Mass 2216.99 Gene names MET12

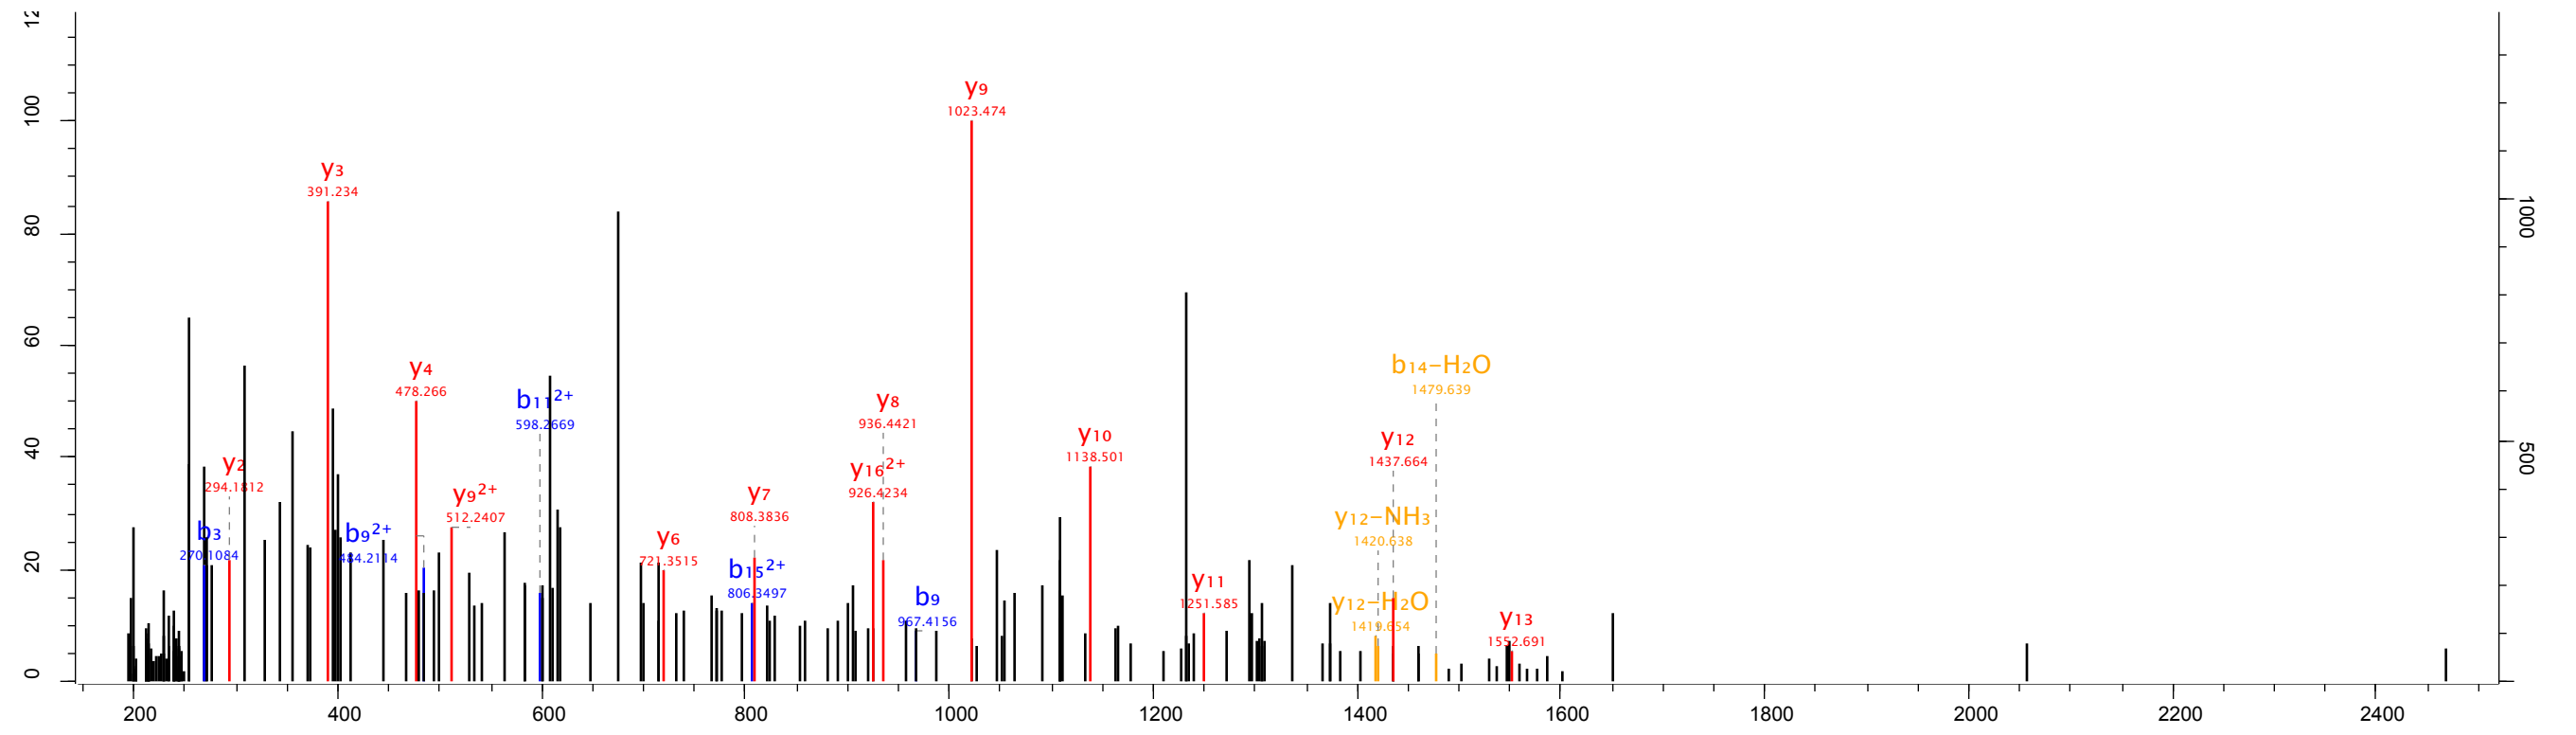

Raw file

UPS1+500ngY\_90minTop17\_BC4\_01\_358

| Scan  | Method   | Score | Mass    | Gene names |
|-------|----------|-------|---------|------------|
| 56555 | TOF; CID | 40.14 | 2405.03 | RPC37      |

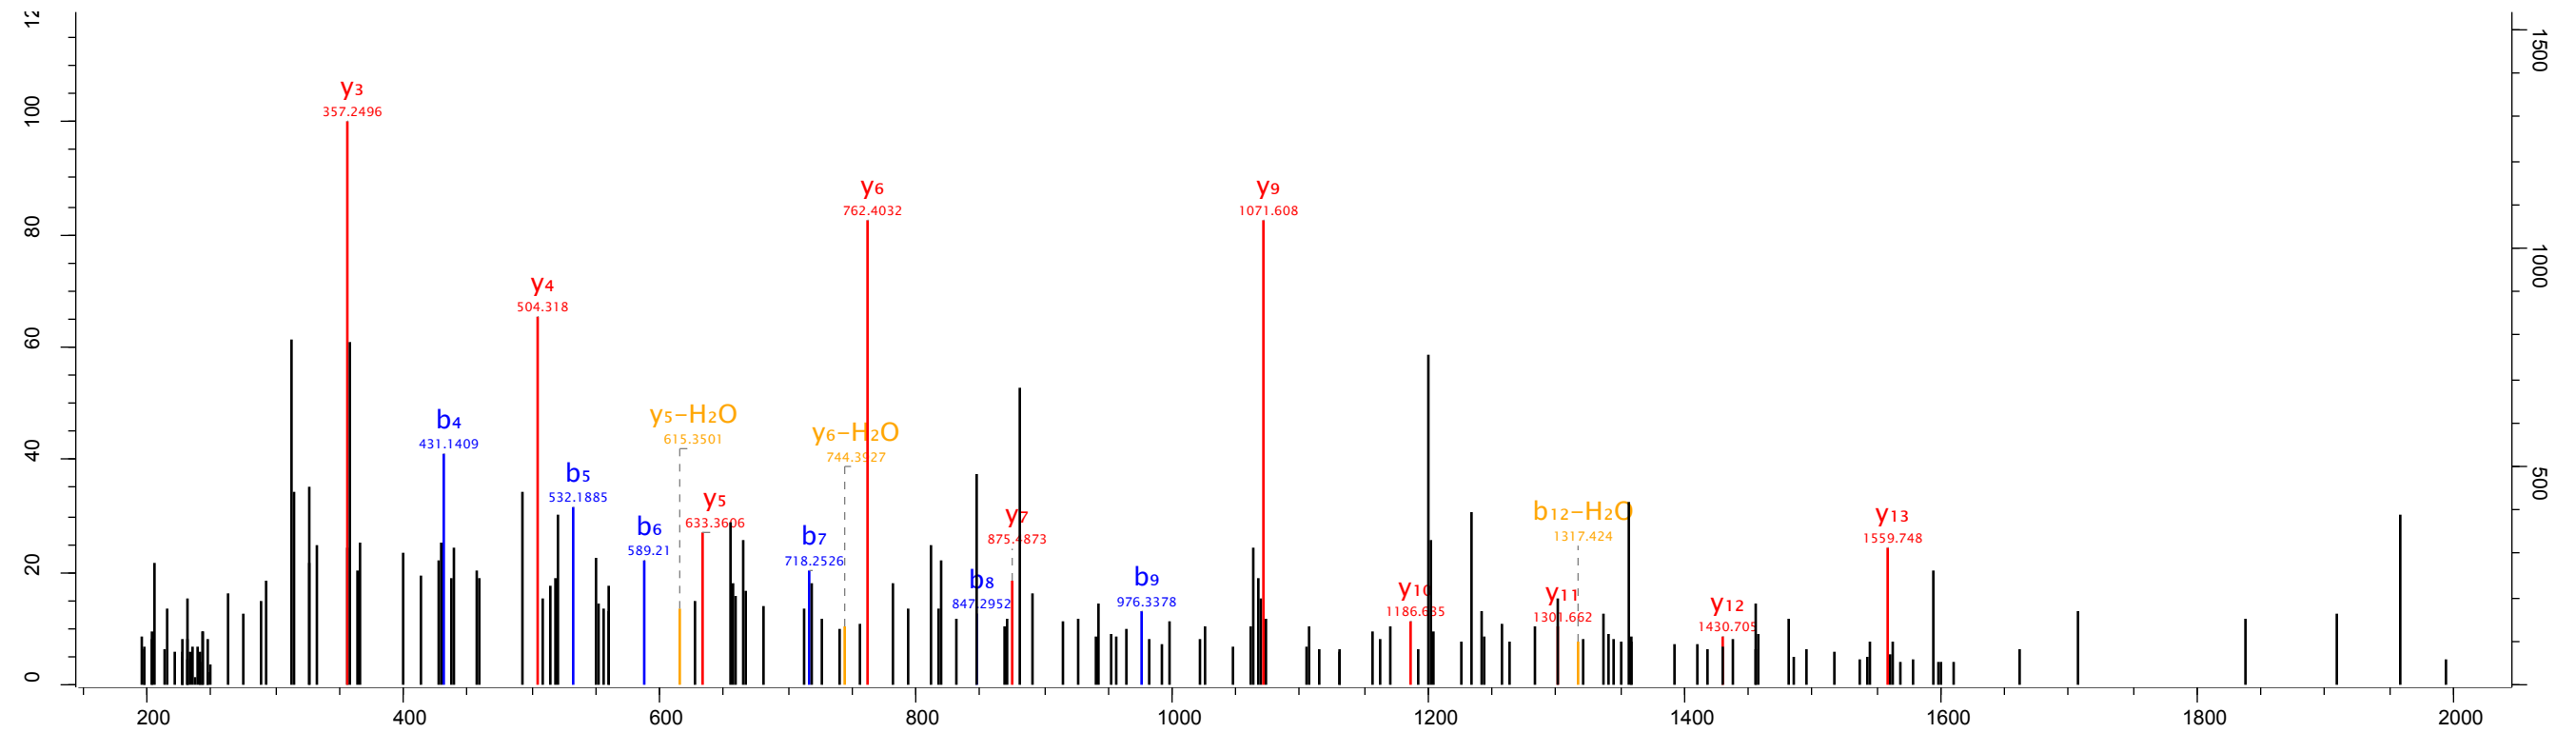



Raw file  
UPS1+500ngY\_90minTop17\_BC4\_01\_358

Scan 56762 Method TOF; CID Score 48.39 Mass 1691.83 Gene names MIC14

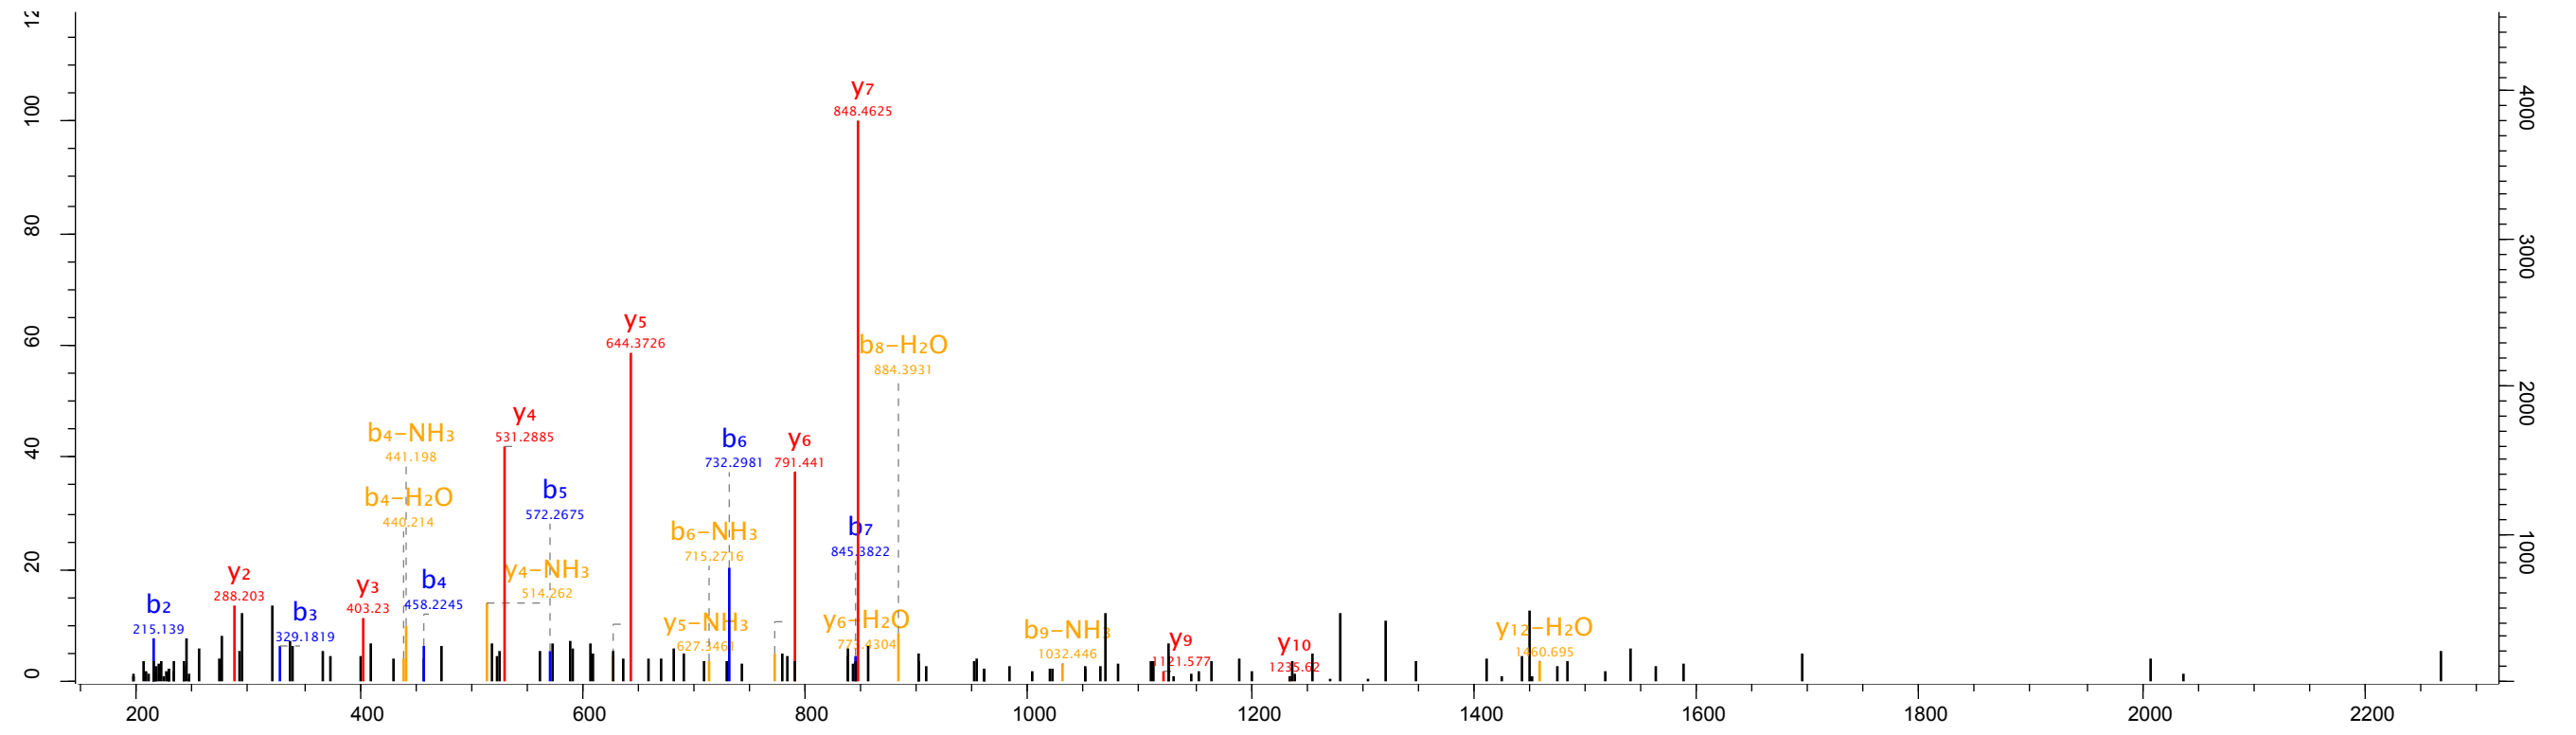

Raw file  
UPS1+500ngY\_90minTop17\_BC4\_01\_358

Scan 58250 Method TOF; CID Score 56.57 Mass 1440.75

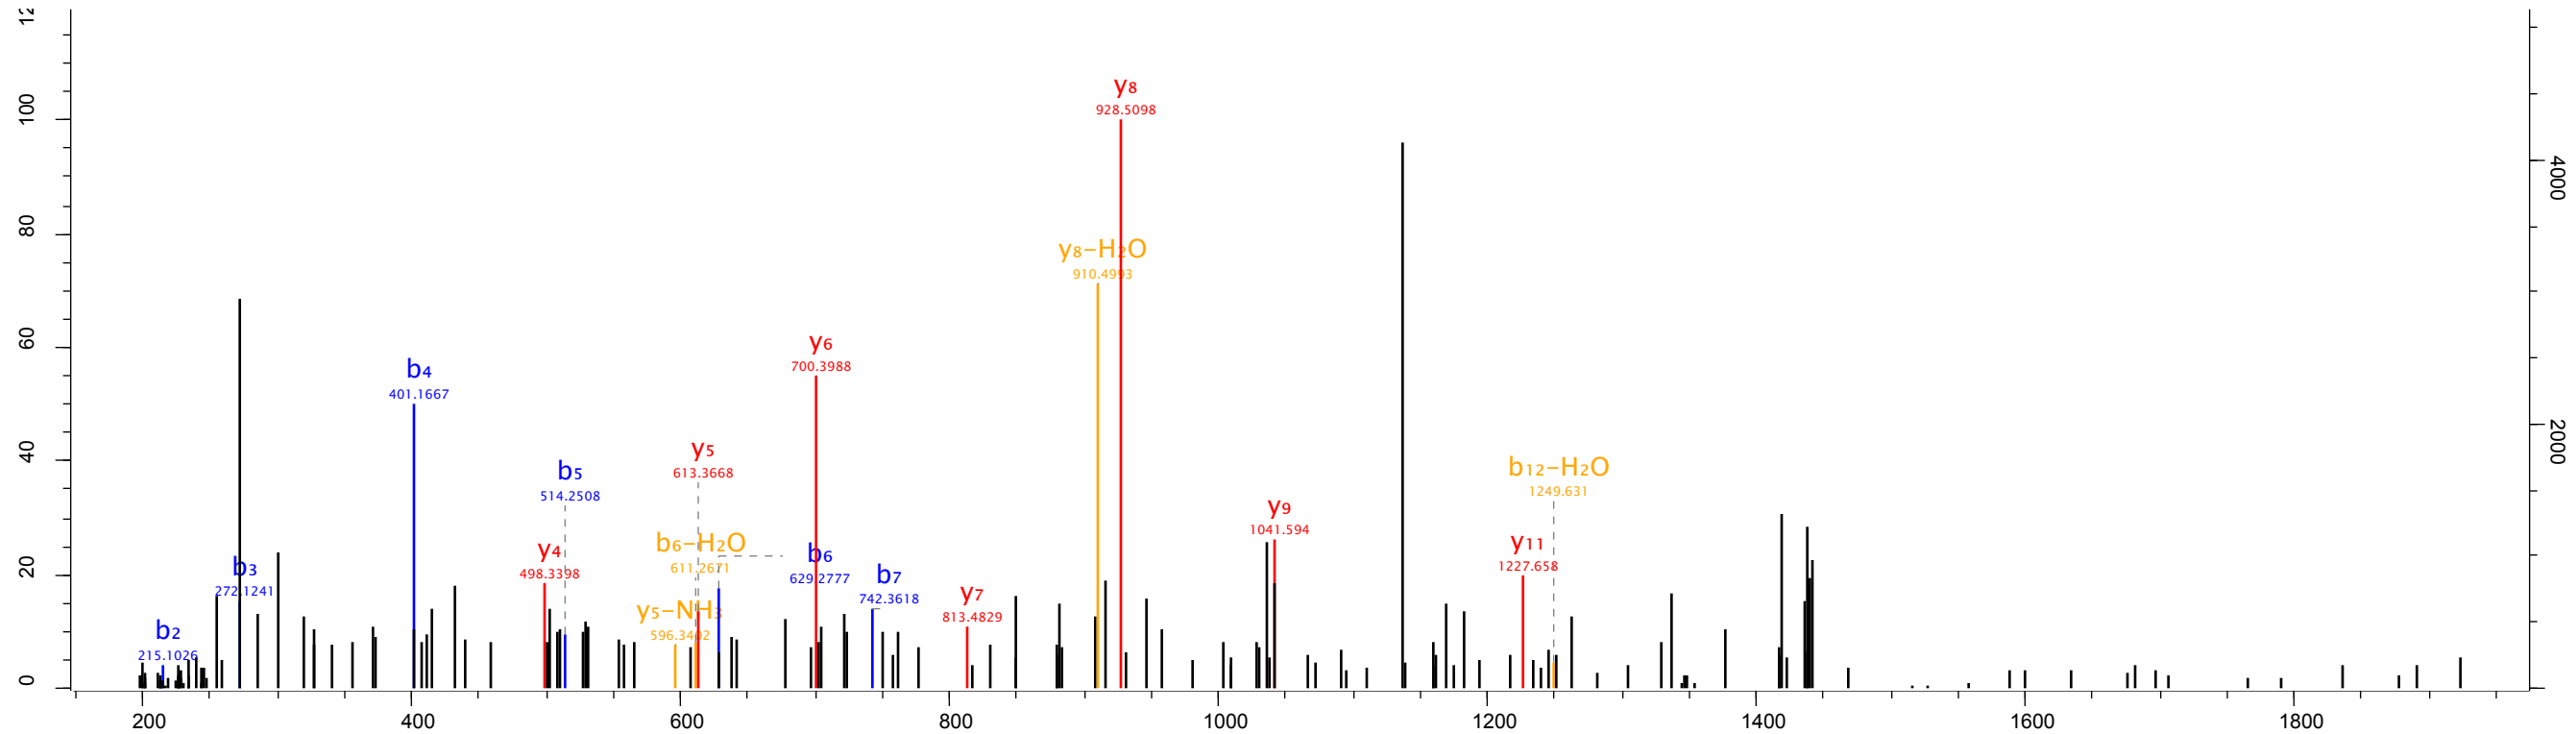

Raw file  
UPS1+500ngY\_90minTop17\_BC4\_01\_358

Scan: 58341  
Method: TOF; CID  
Score: 42.63  
Mass: 2053.02  
Gene names: NUP84

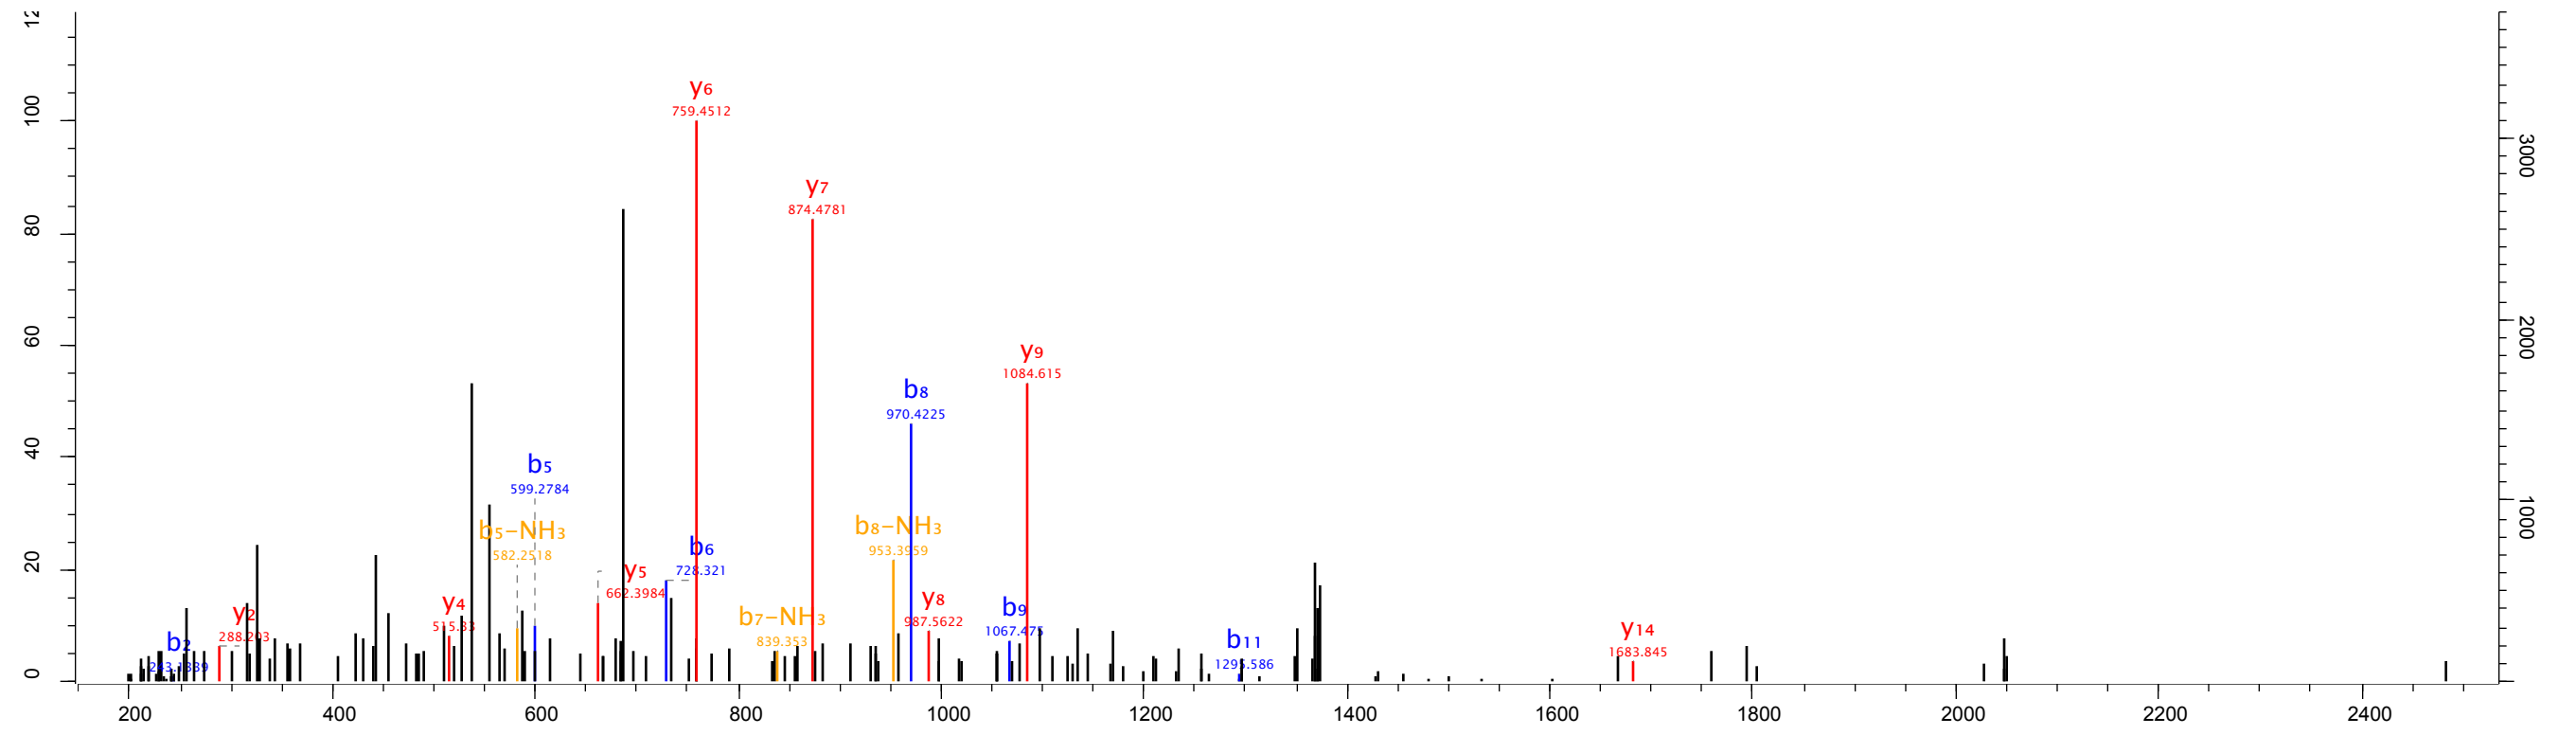

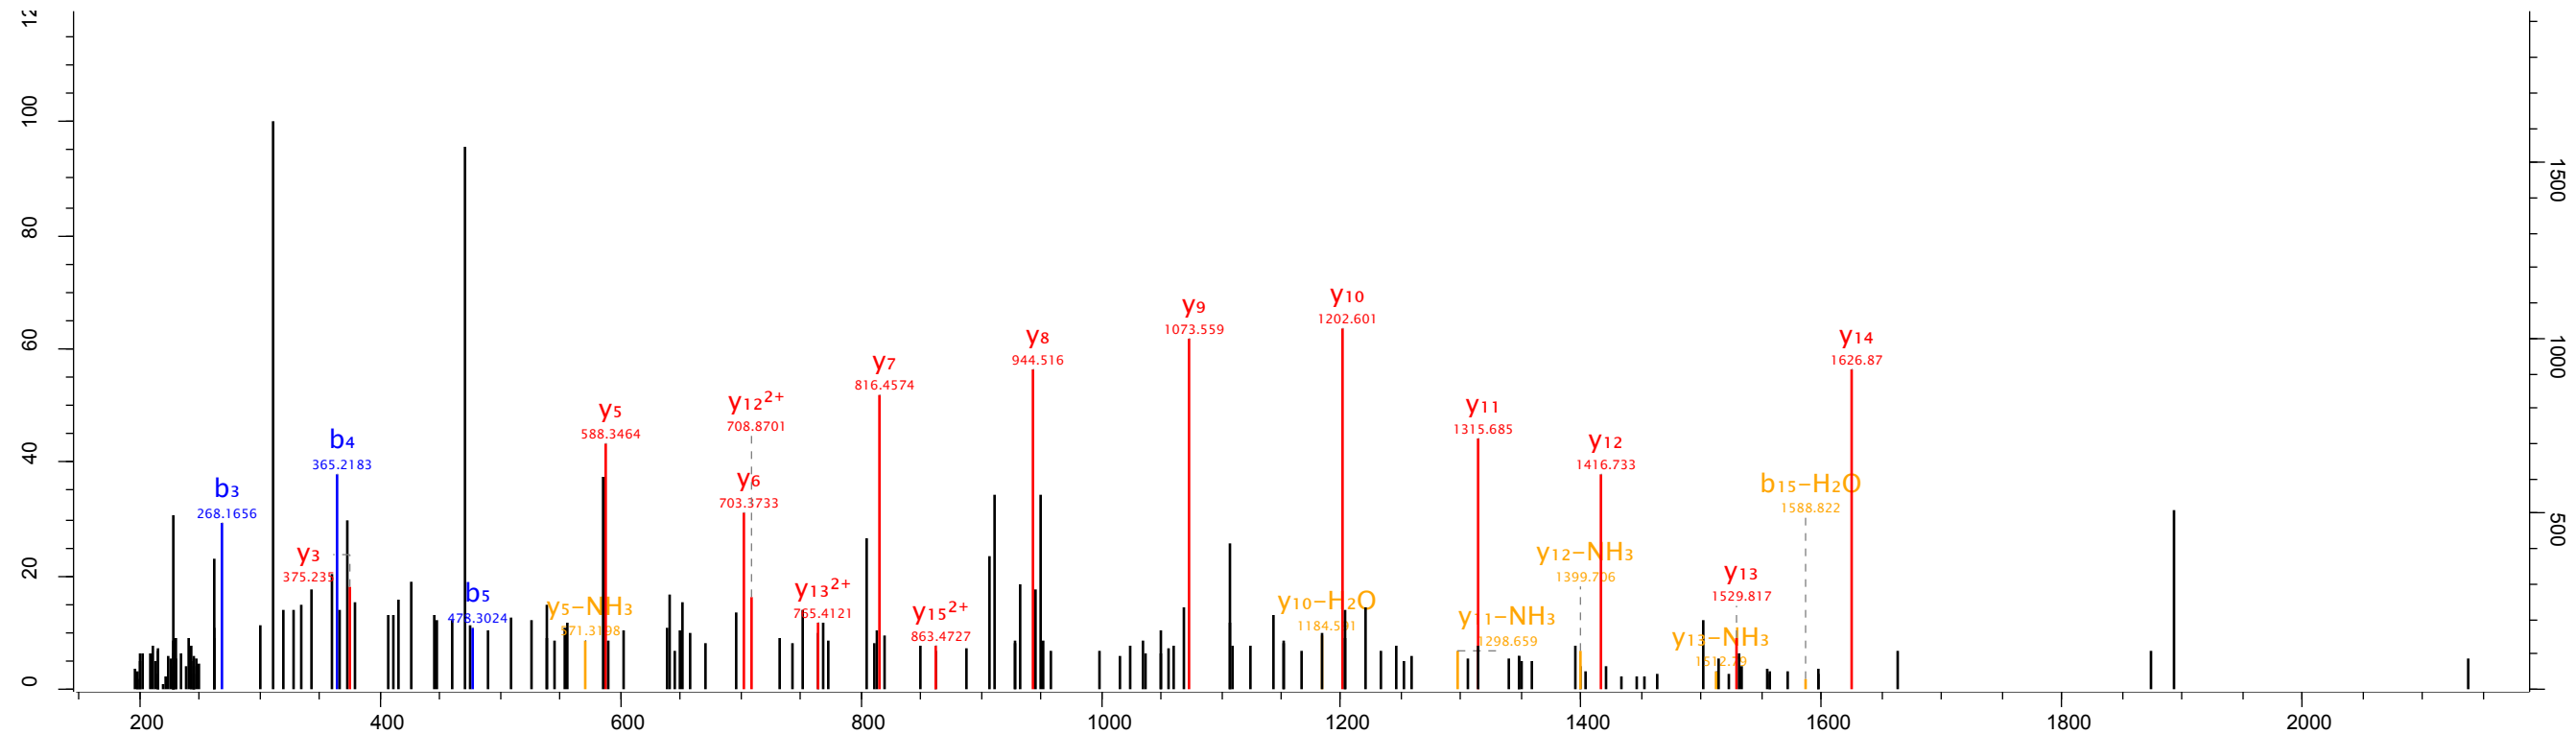

Raw file  
UPS1+500ngY\_90minTop17\_BC4\_01\_358

| Scan  | Method   | Score  | Mass    | Gene names |
|-------|----------|--------|---------|------------|
| 58763 | TOF; CID | 128.01 | 1303.71 | ERV14      |

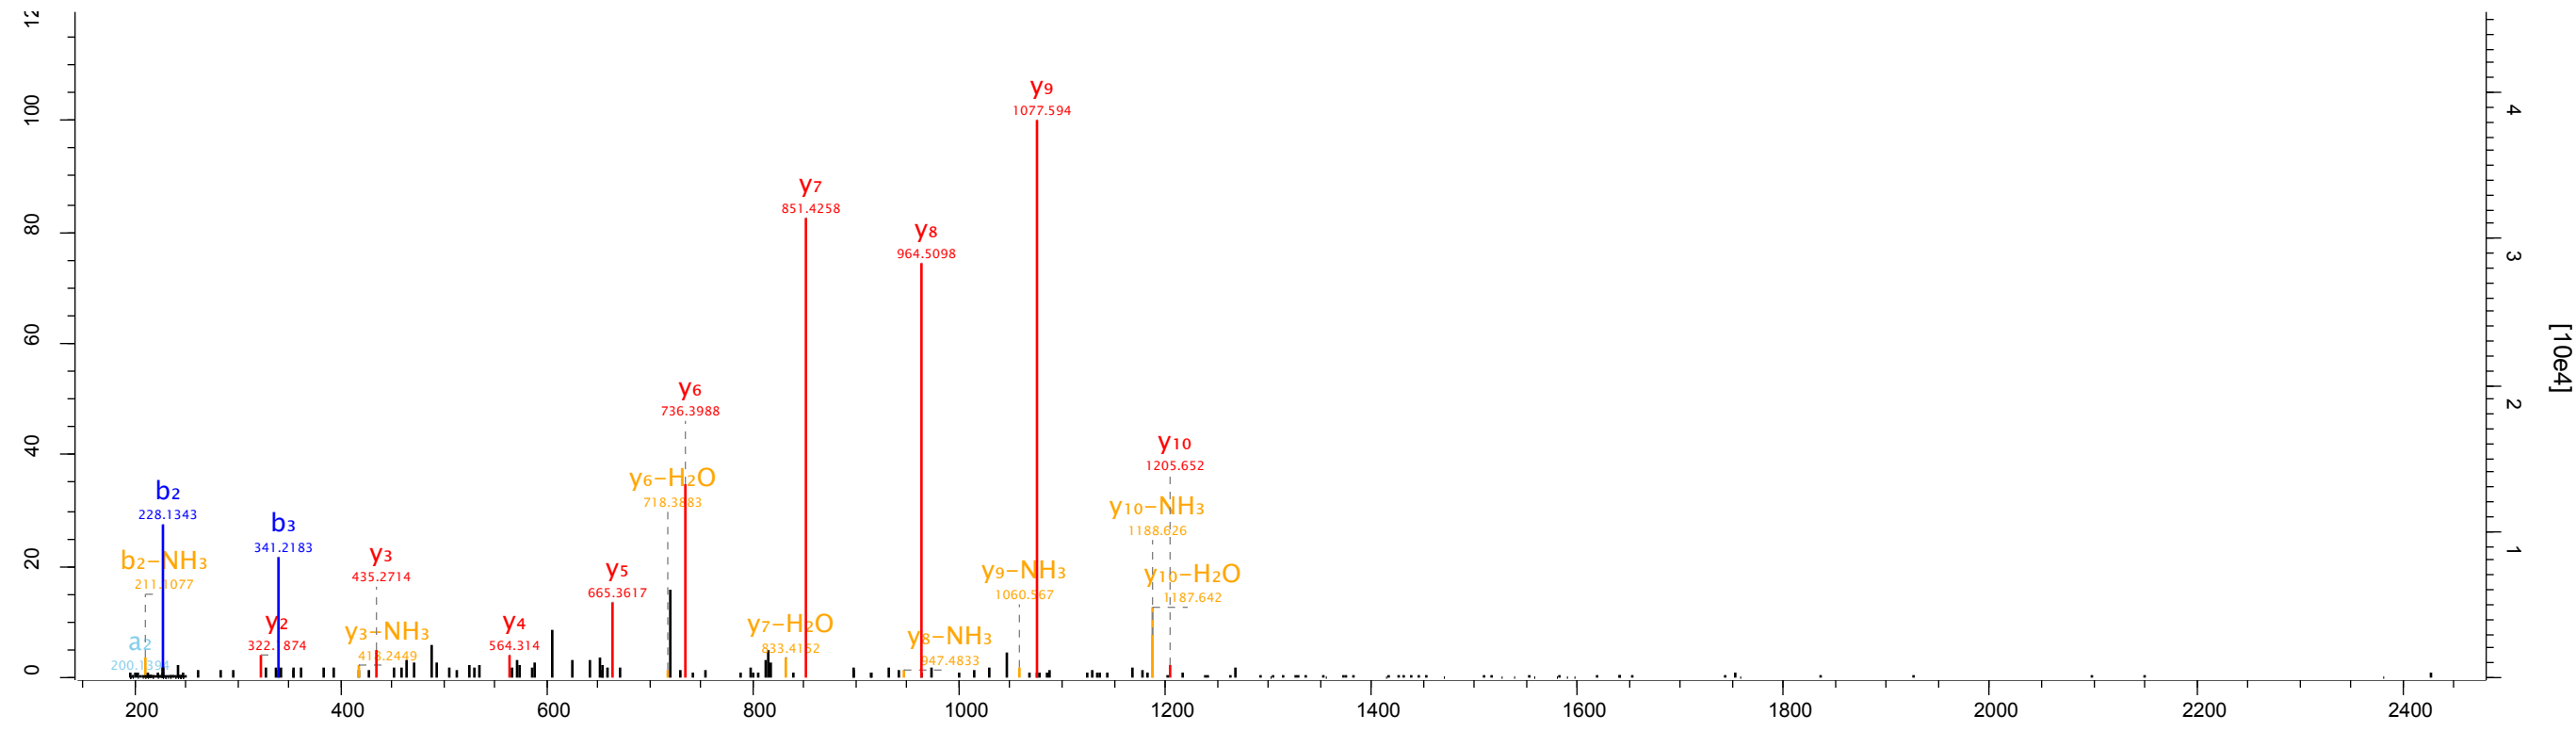

Raw file  
UPS1+500ngY\_90minTop17\_BC4\_01\_358

| Scan  | Method   | Score | Mass    | Gene names |
|-------|----------|-------|---------|------------|
| 59047 | TOF; CID | 70.2  | 1699.94 | PAM18      |

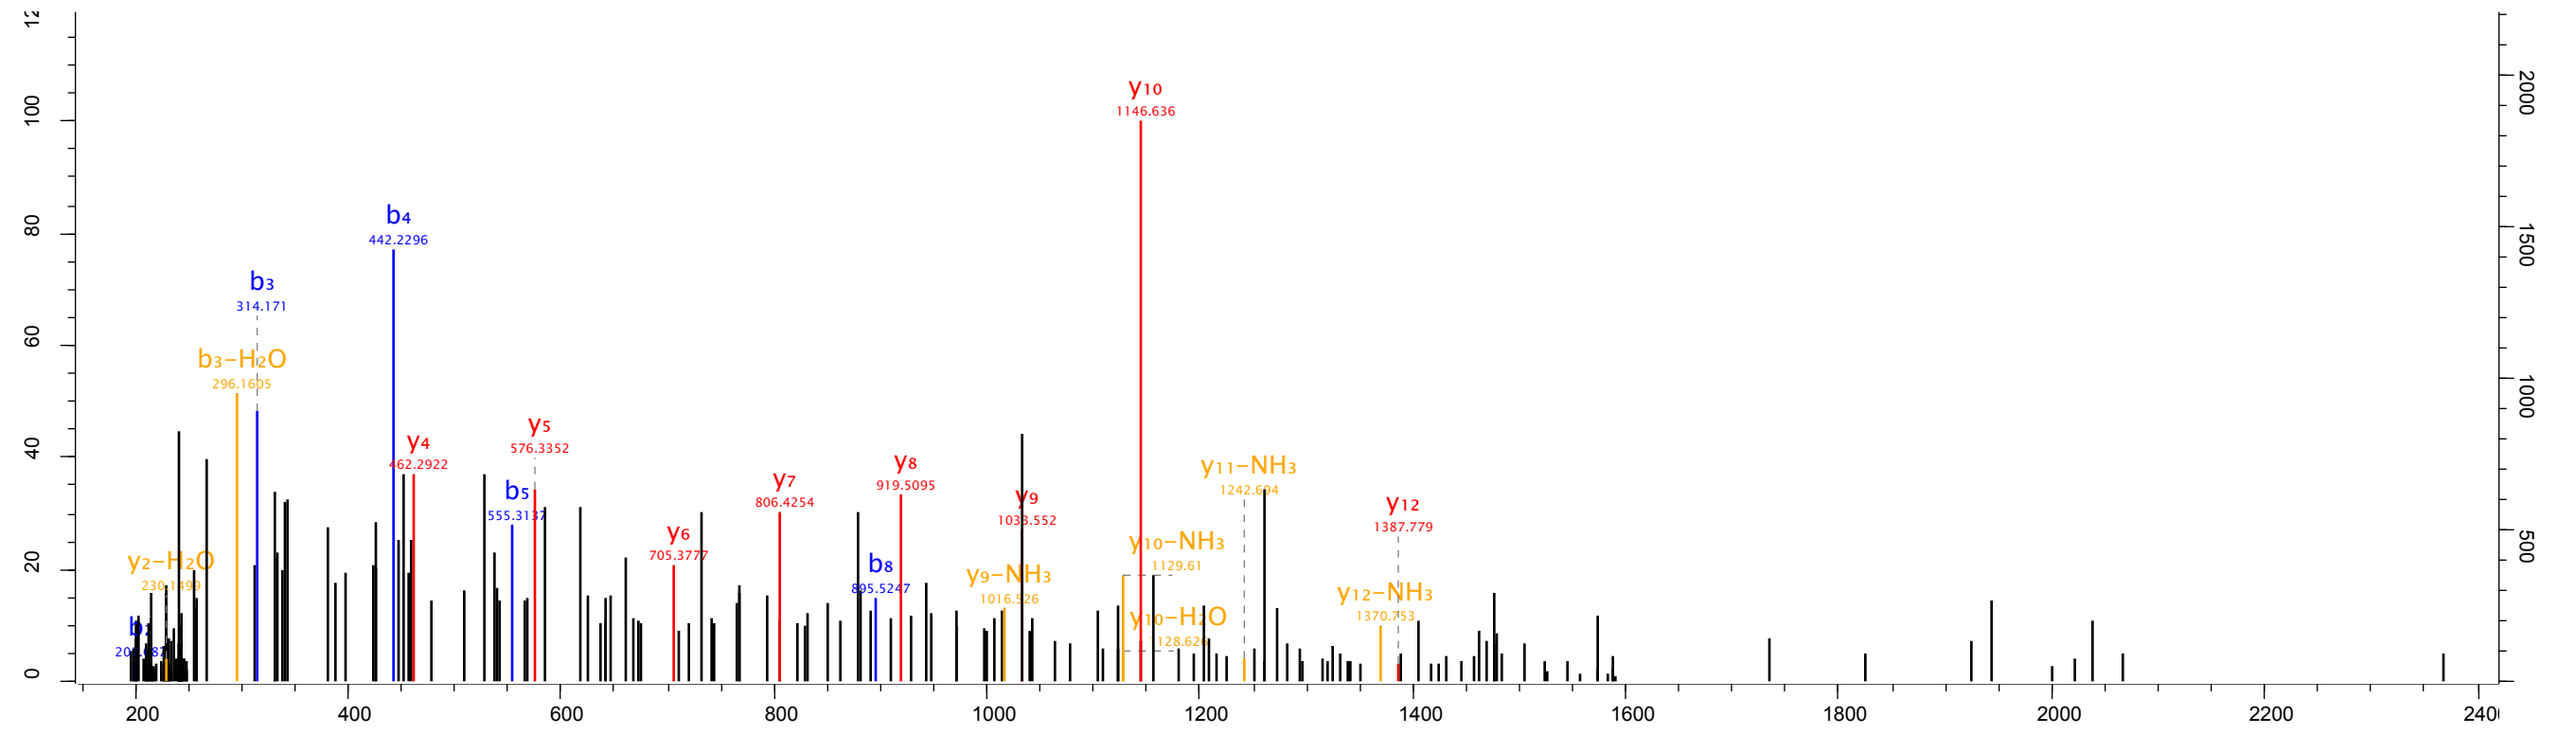

Raw file  
UPS1+500ngY\_90minTop17\_BC4\_01\_358

Scan 59778 Method TOF; CID Score 70.78 Mass 2023 Gene names ZTA1

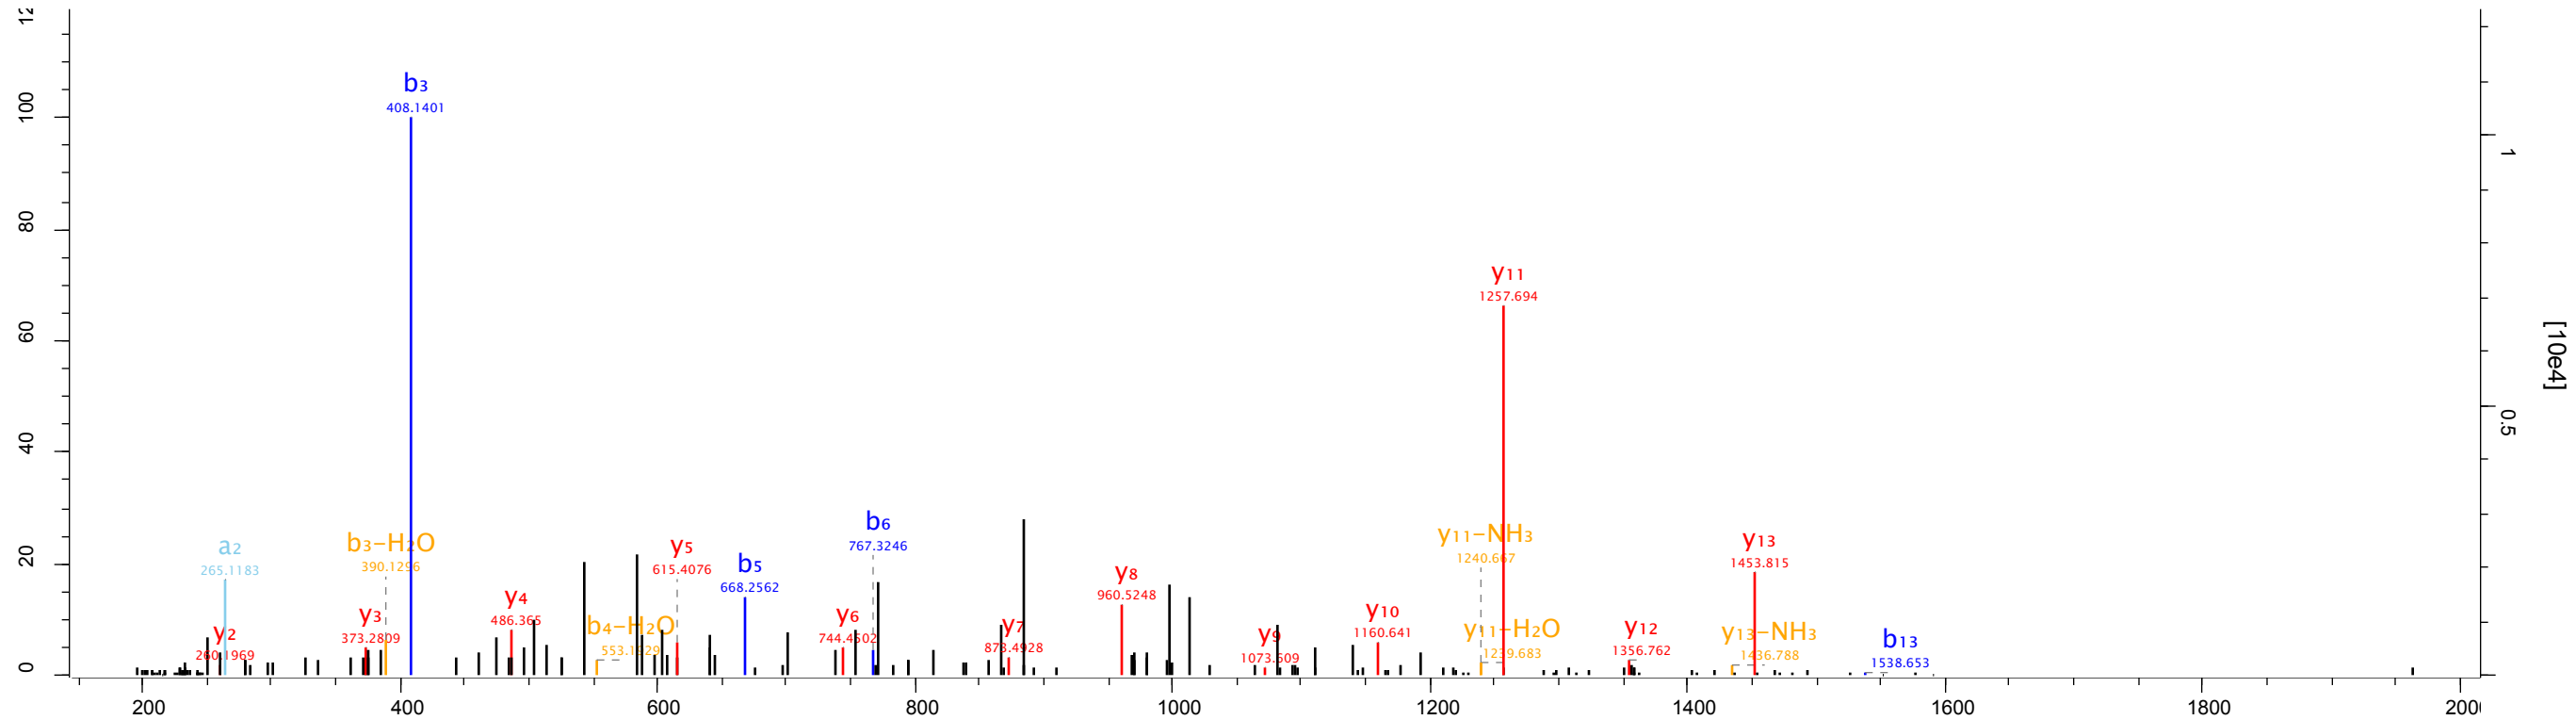

Raw file

UPS1+500ngY\_90minTop17\_BC4\_01\_358

| Scan  | Method   | Score | Mass    | Gene names |
|-------|----------|-------|---------|------------|
| 60194 | TOF; CID | 63.66 | 1321.69 | GIR2       |

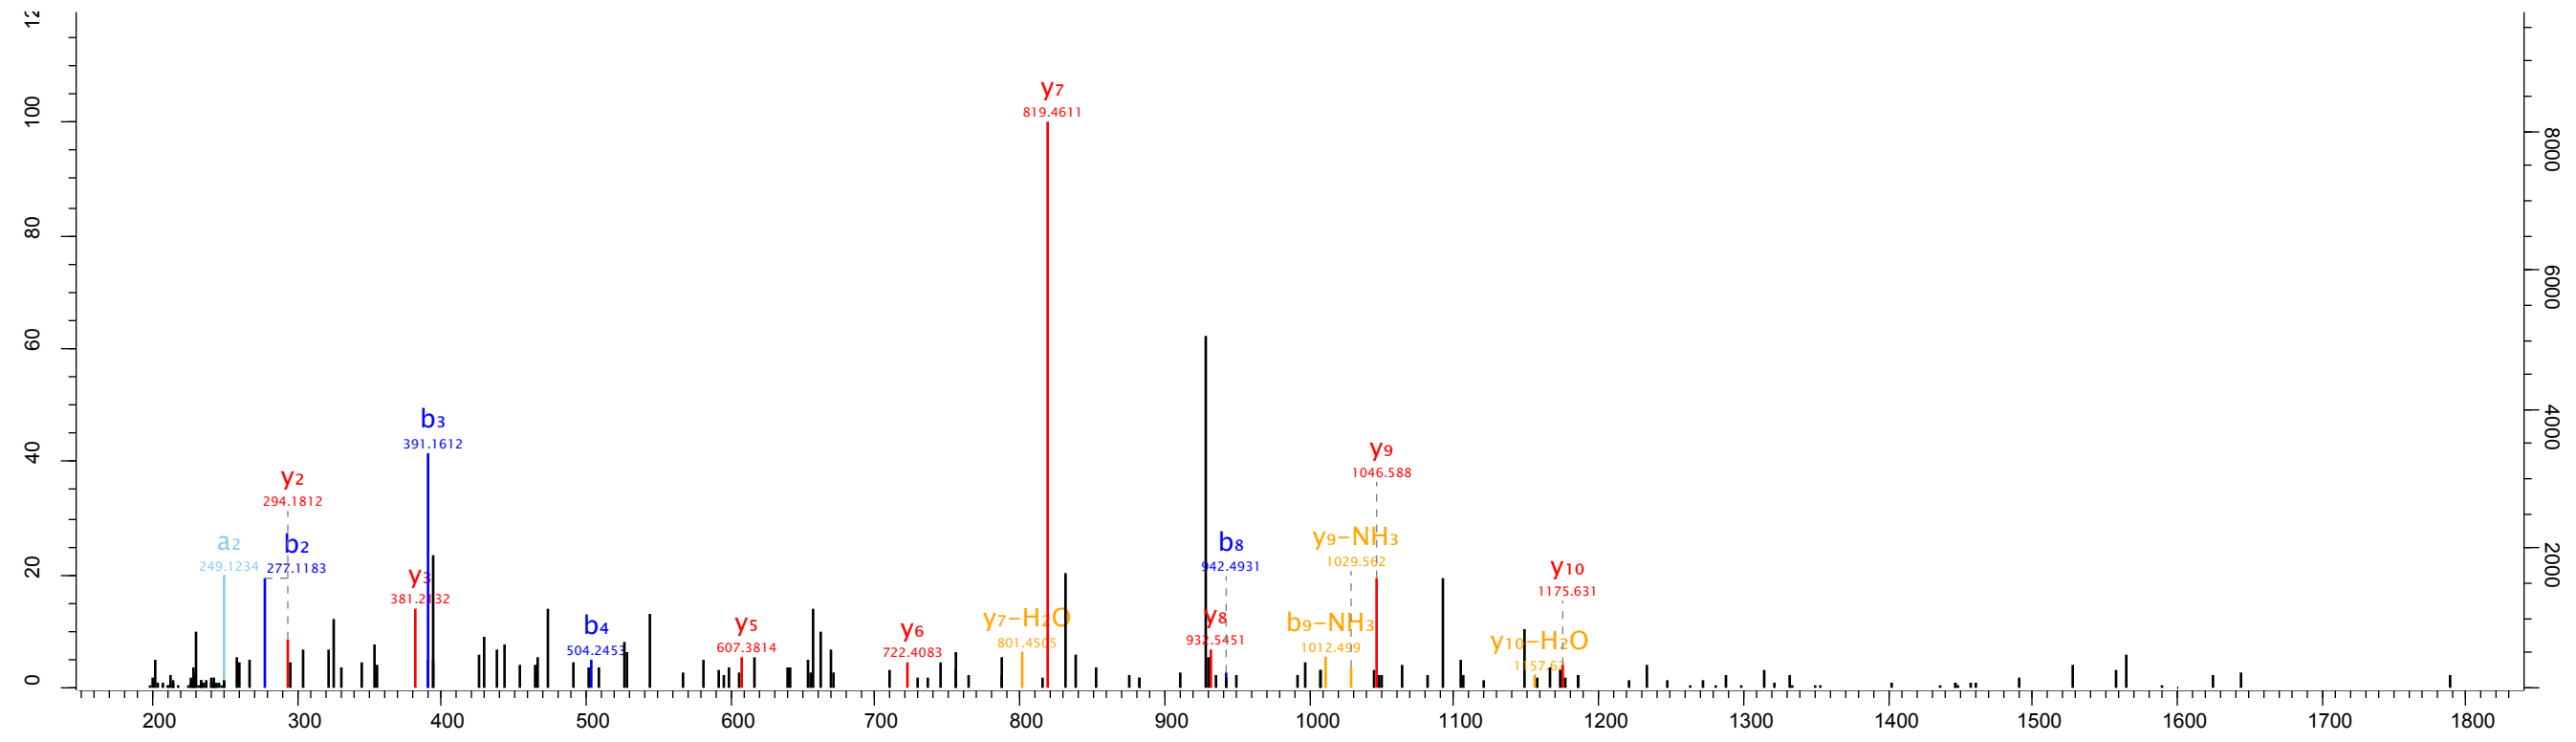



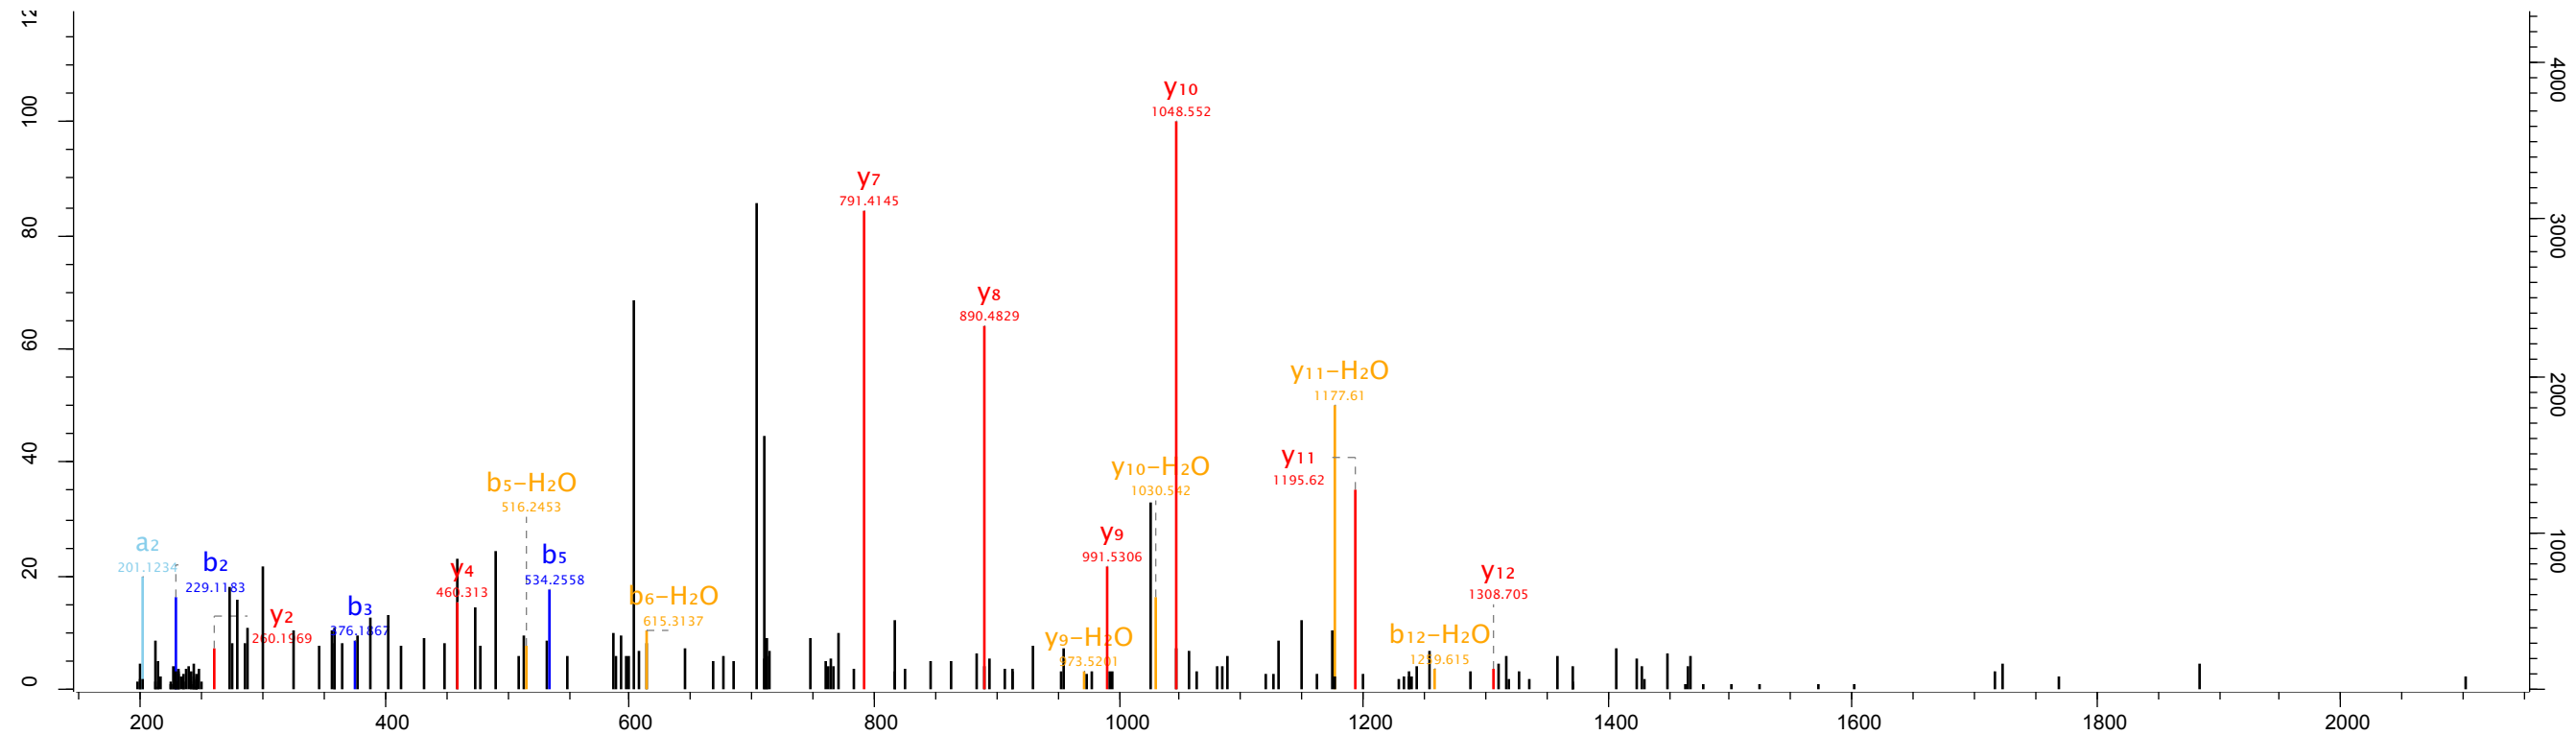

Raw file

UPS1+500ngY\_90minTop17\_BC4\_01\_358

| Scan  | Method   | Score | Mass    | Gene names |
|-------|----------|-------|---------|------------|
| 60833 | TOF; CID | 55.31 | 1327.77 | NOC2       |

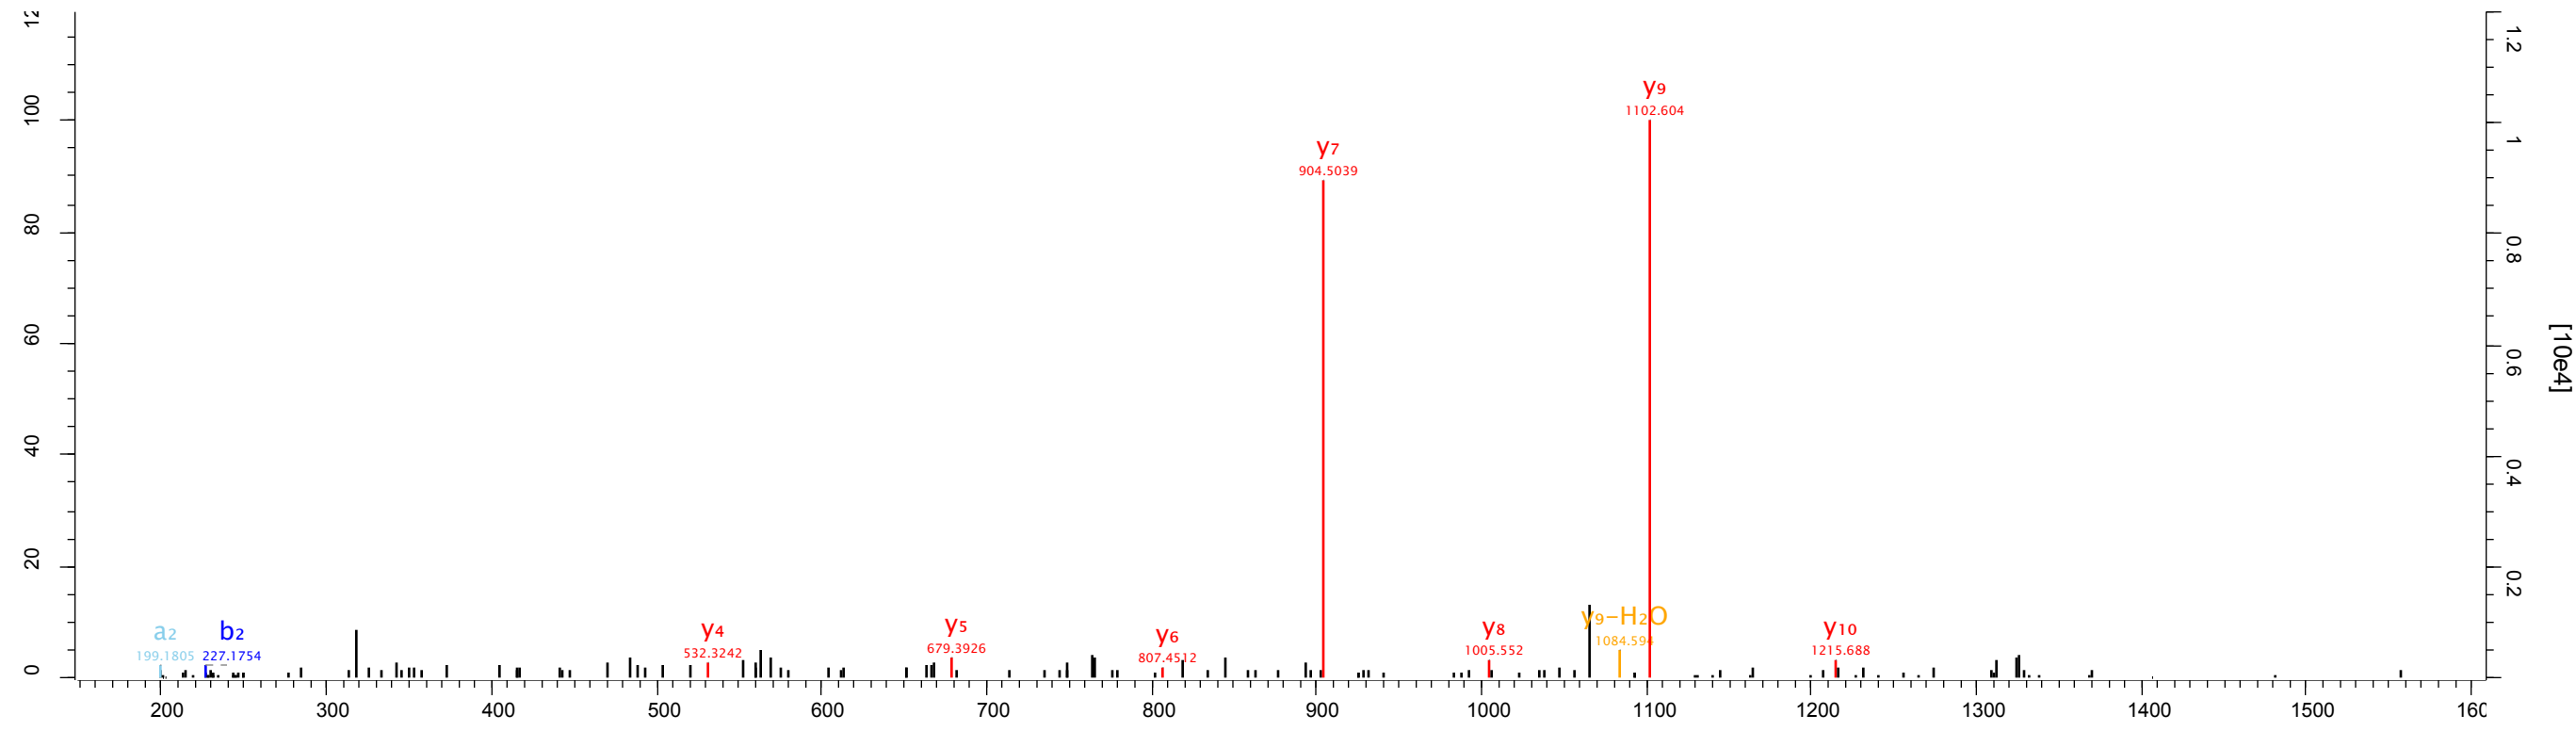

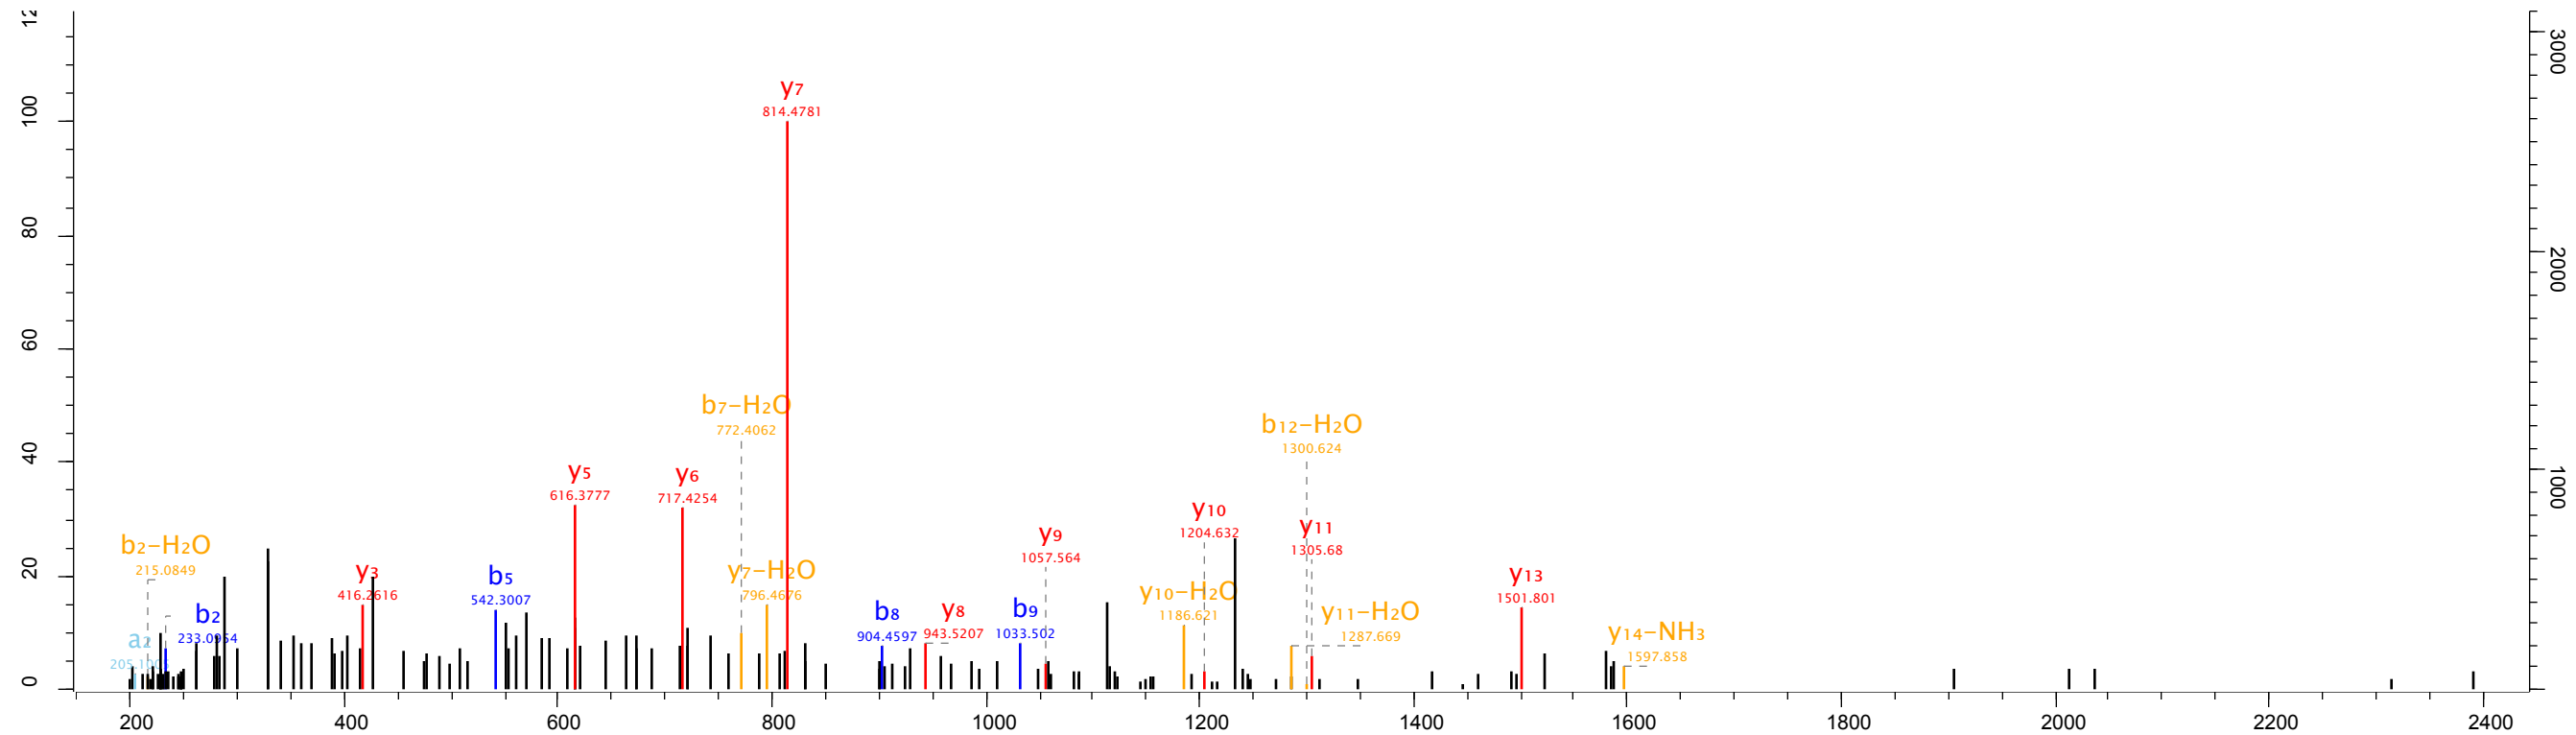

Raw file

UPS1+500ngY\_90minTop17\_BC4\_01\_358

| Scan  | Method   | Score | Mass    | Gene names |
|-------|----------|-------|---------|------------|
| 61086 | TOF; CID | 91.96 | 1329.74 | PHO86      |

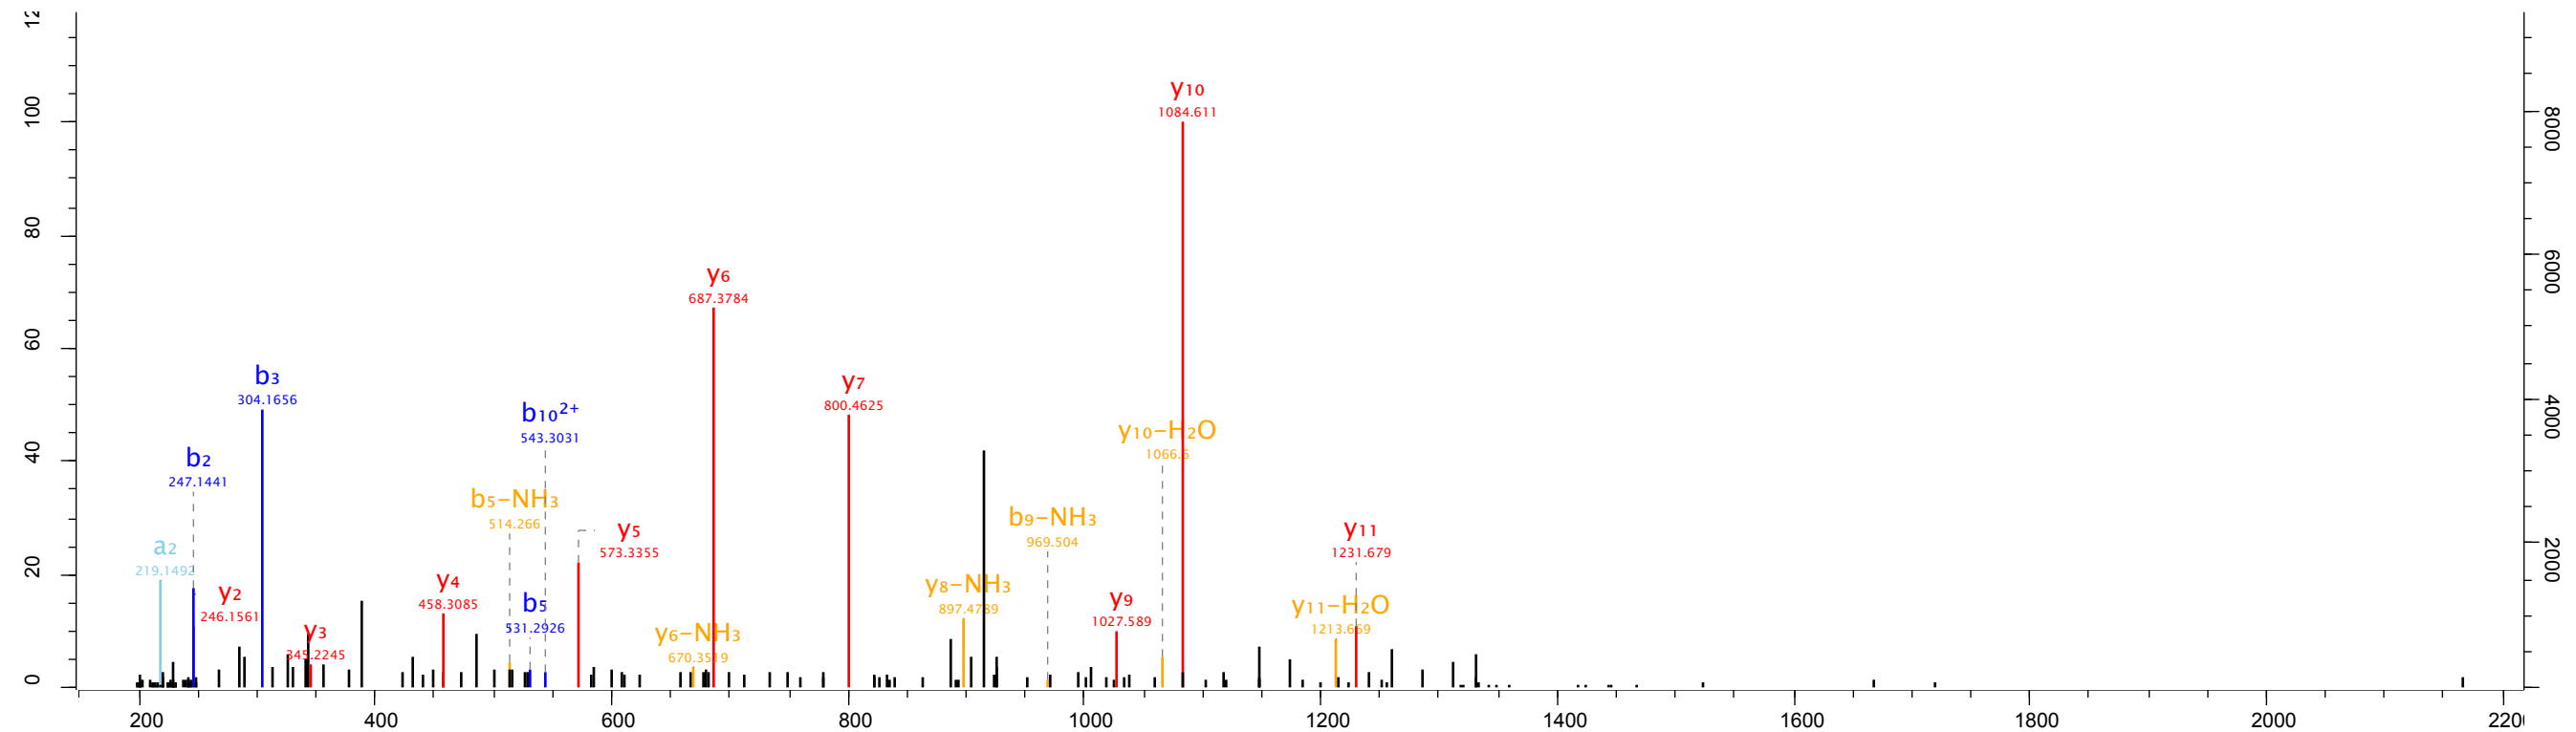

Raw file  
UPS1+500ngY\_90minTop17\_BC4\_01\_358  
Scan 61122 Method TOF; CID Score 44.79 Mass 2058.99

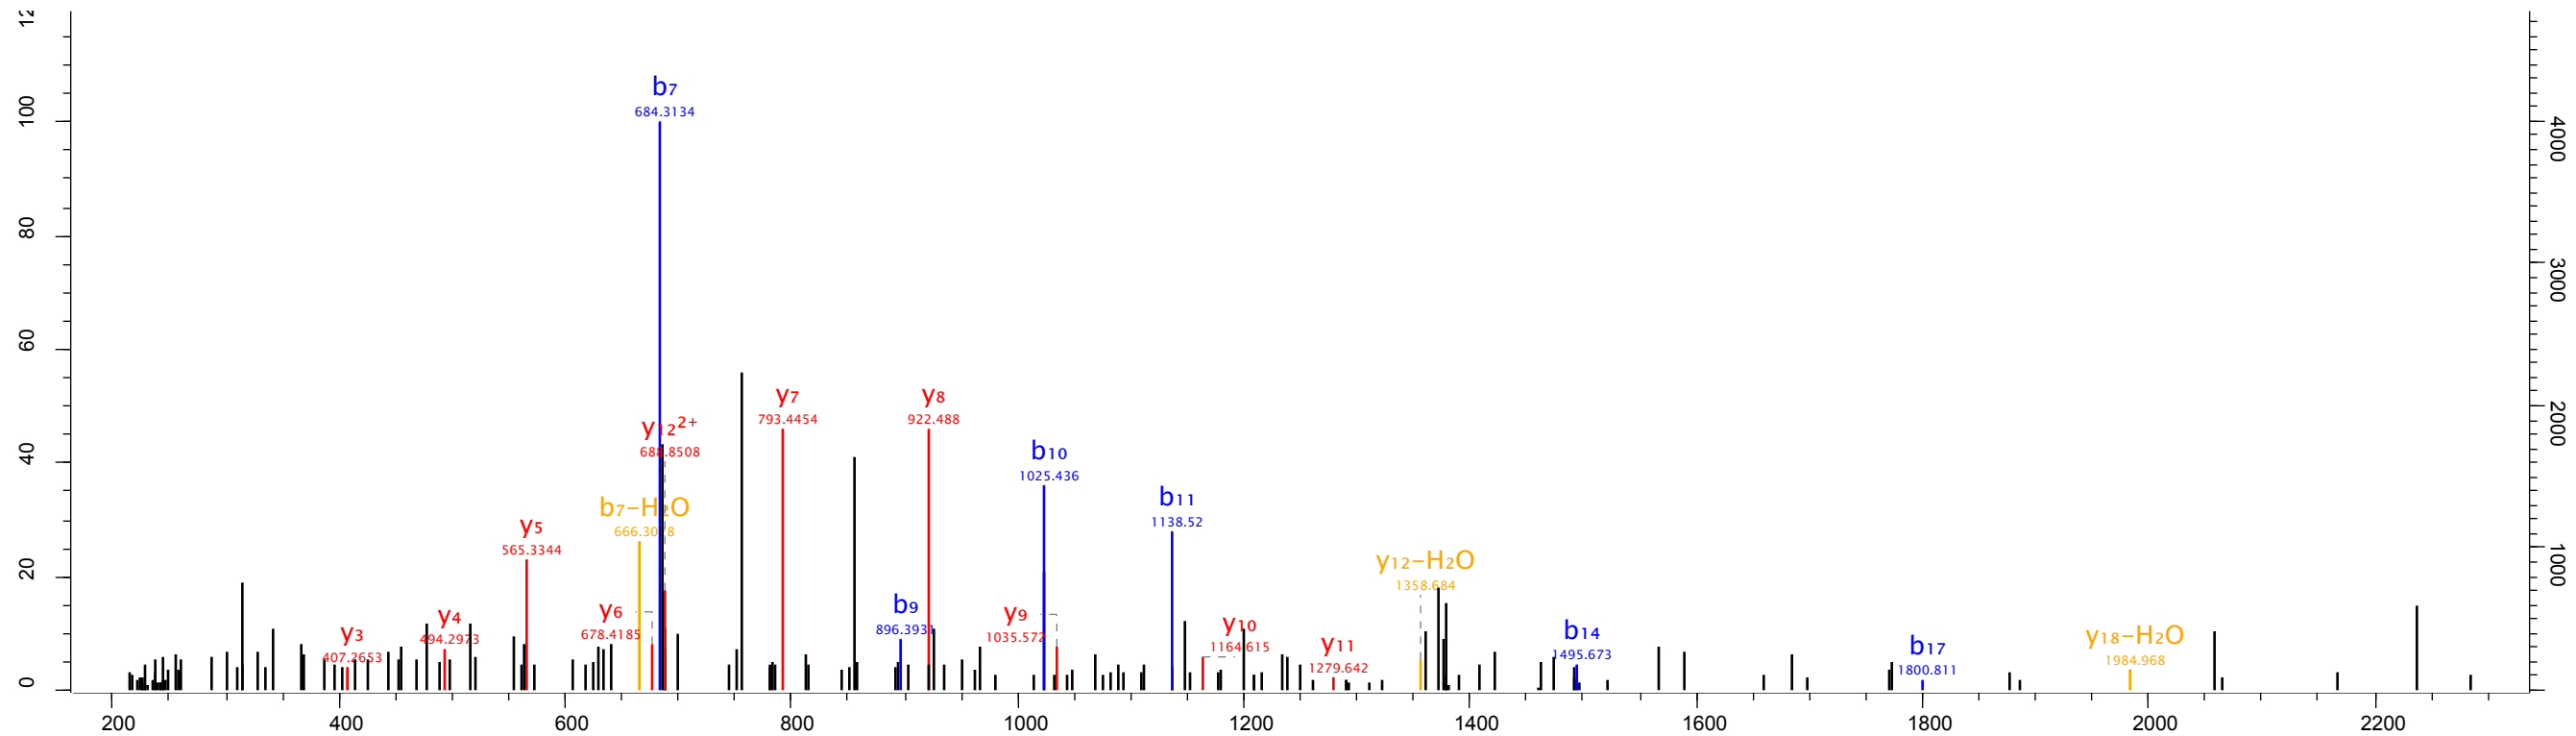

Raw file  
UPS1+500ngY\_90minTop17\_BC4\_01\_358

| Scan  | Method   | Score | Mass    |
|-------|----------|-------|---------|
| 61131 | TOF; CID | 44.16 | 2622.28 |

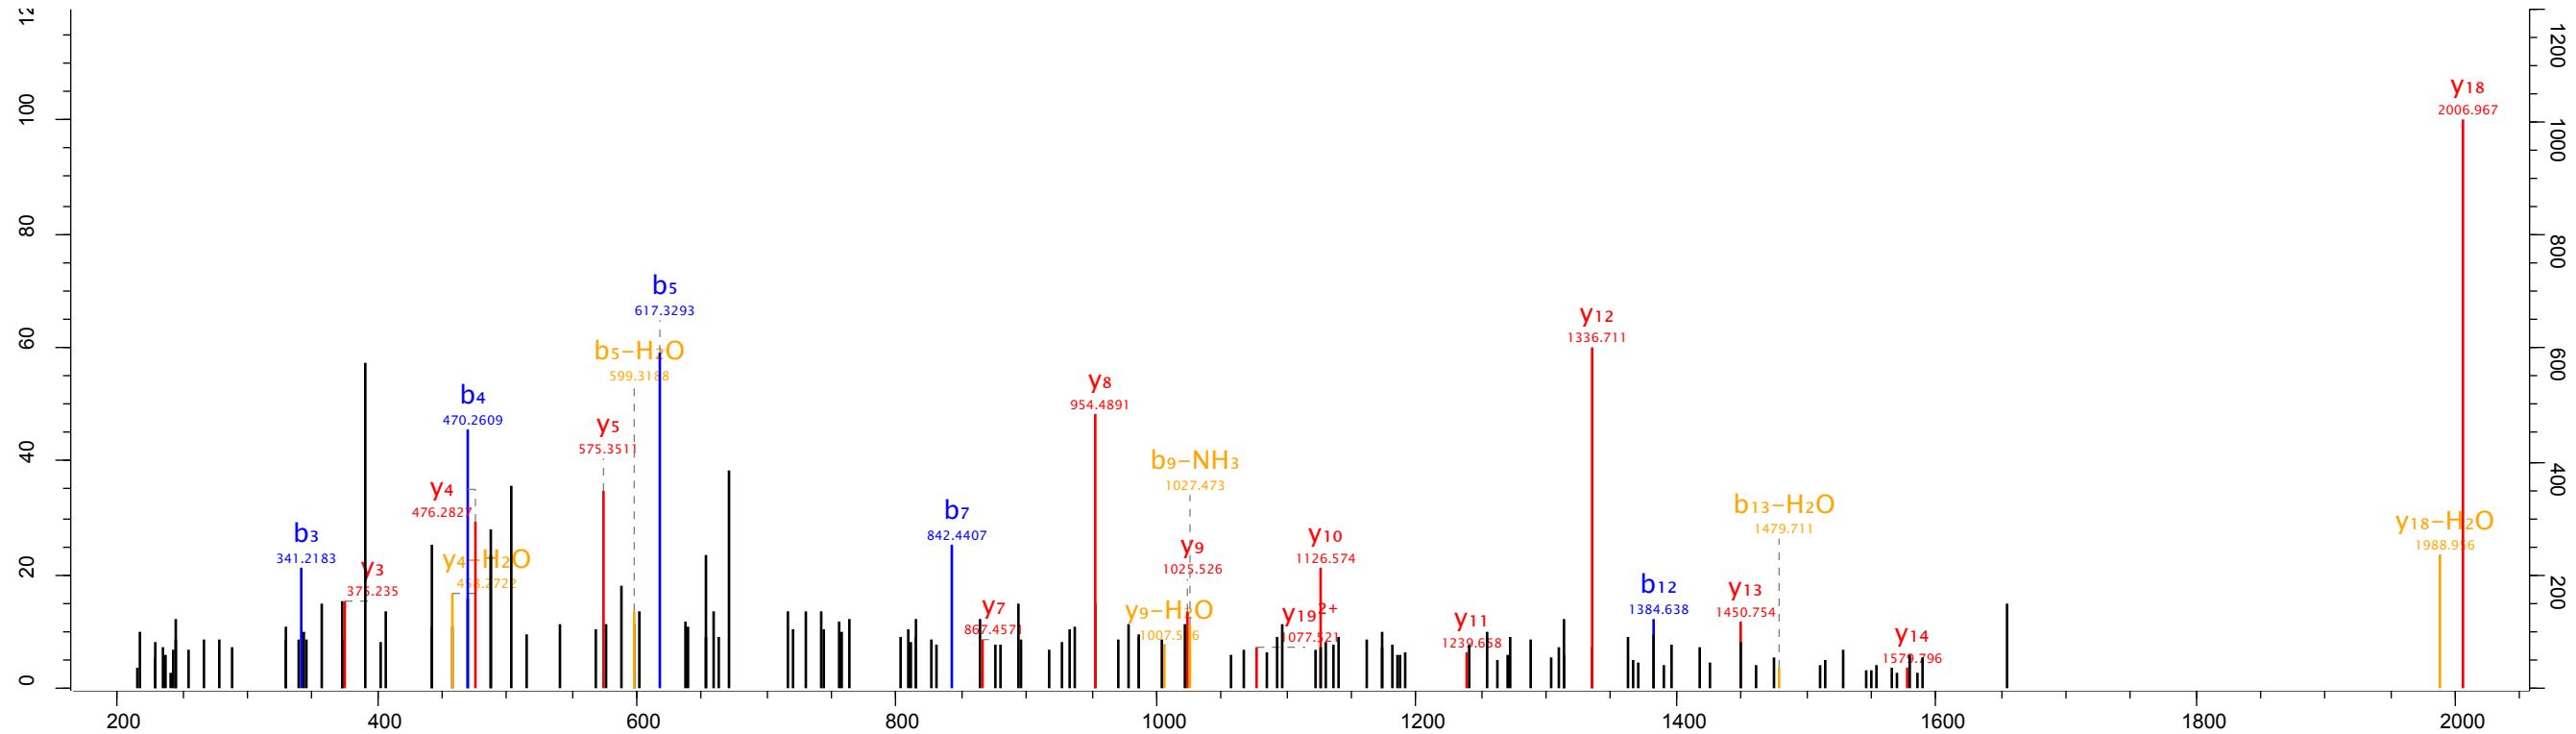

Raw file

UPS1+500ngY\_90minTop17\_BC4\_01\_358

Scan 61193 Method TOF; CID Score 60.06 Mass 2030.02 Gene names RIX7

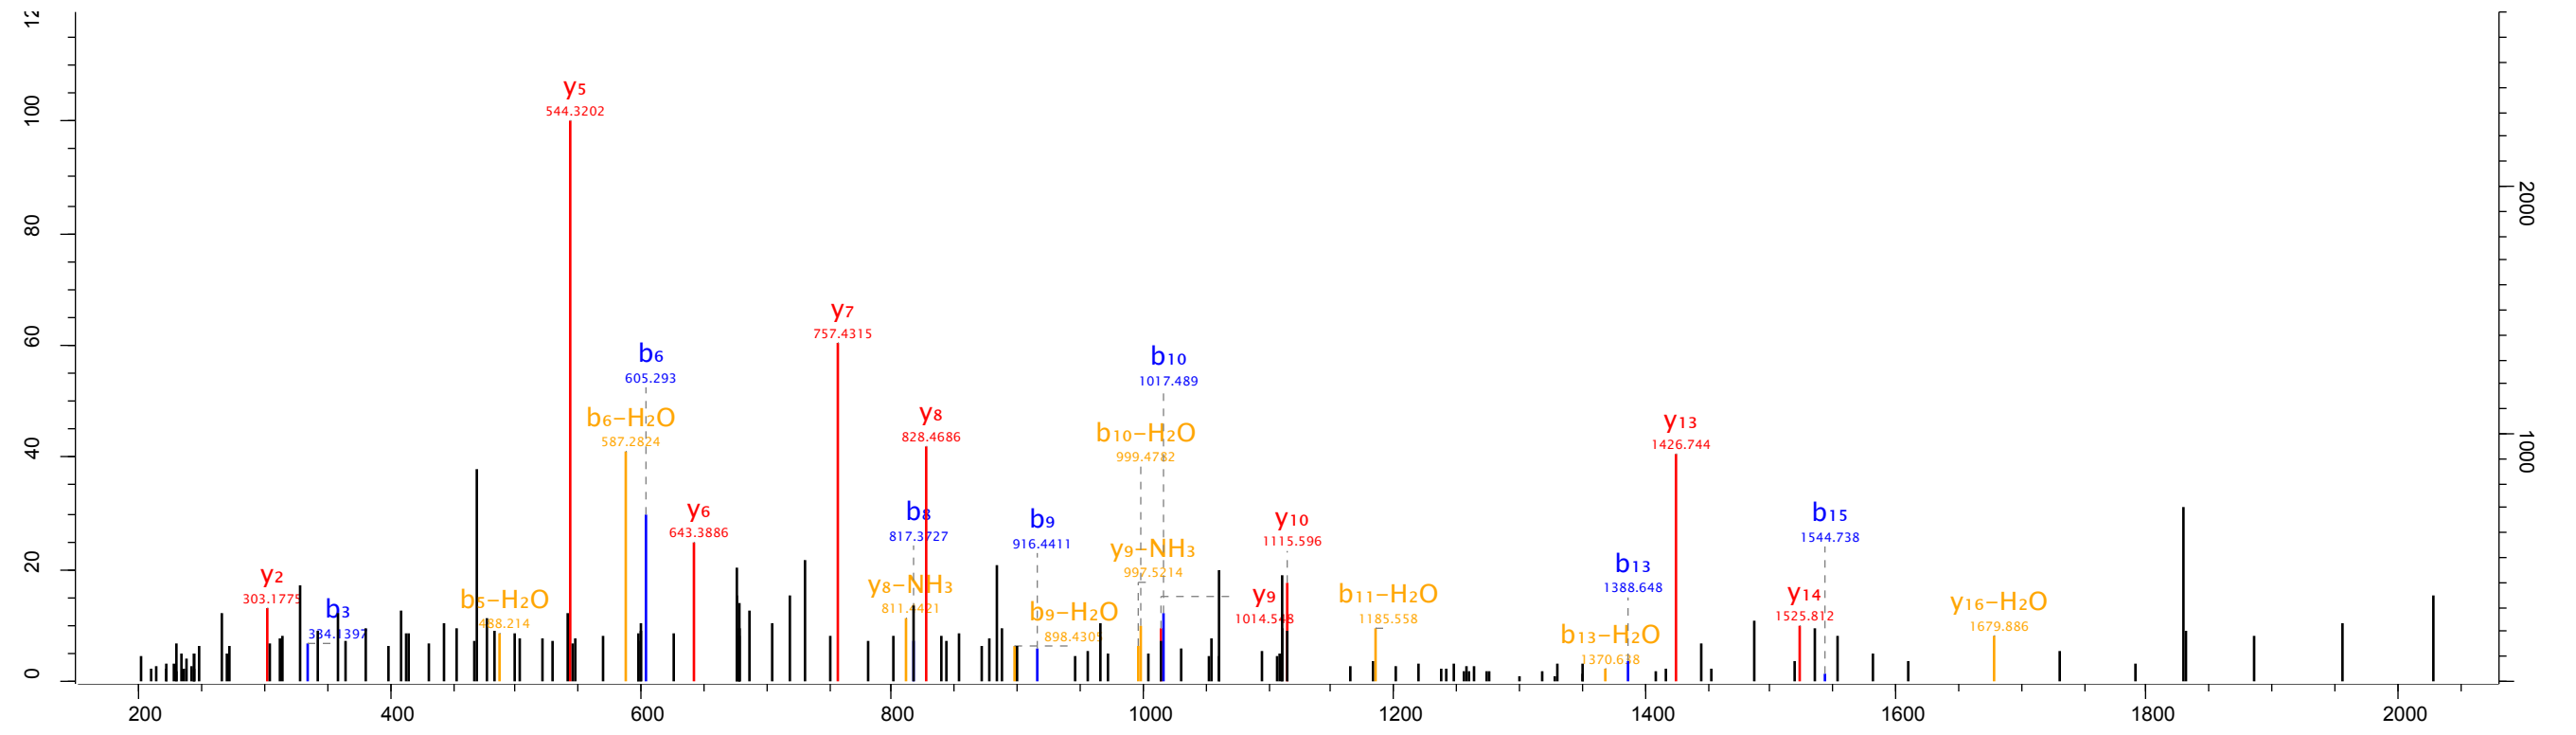

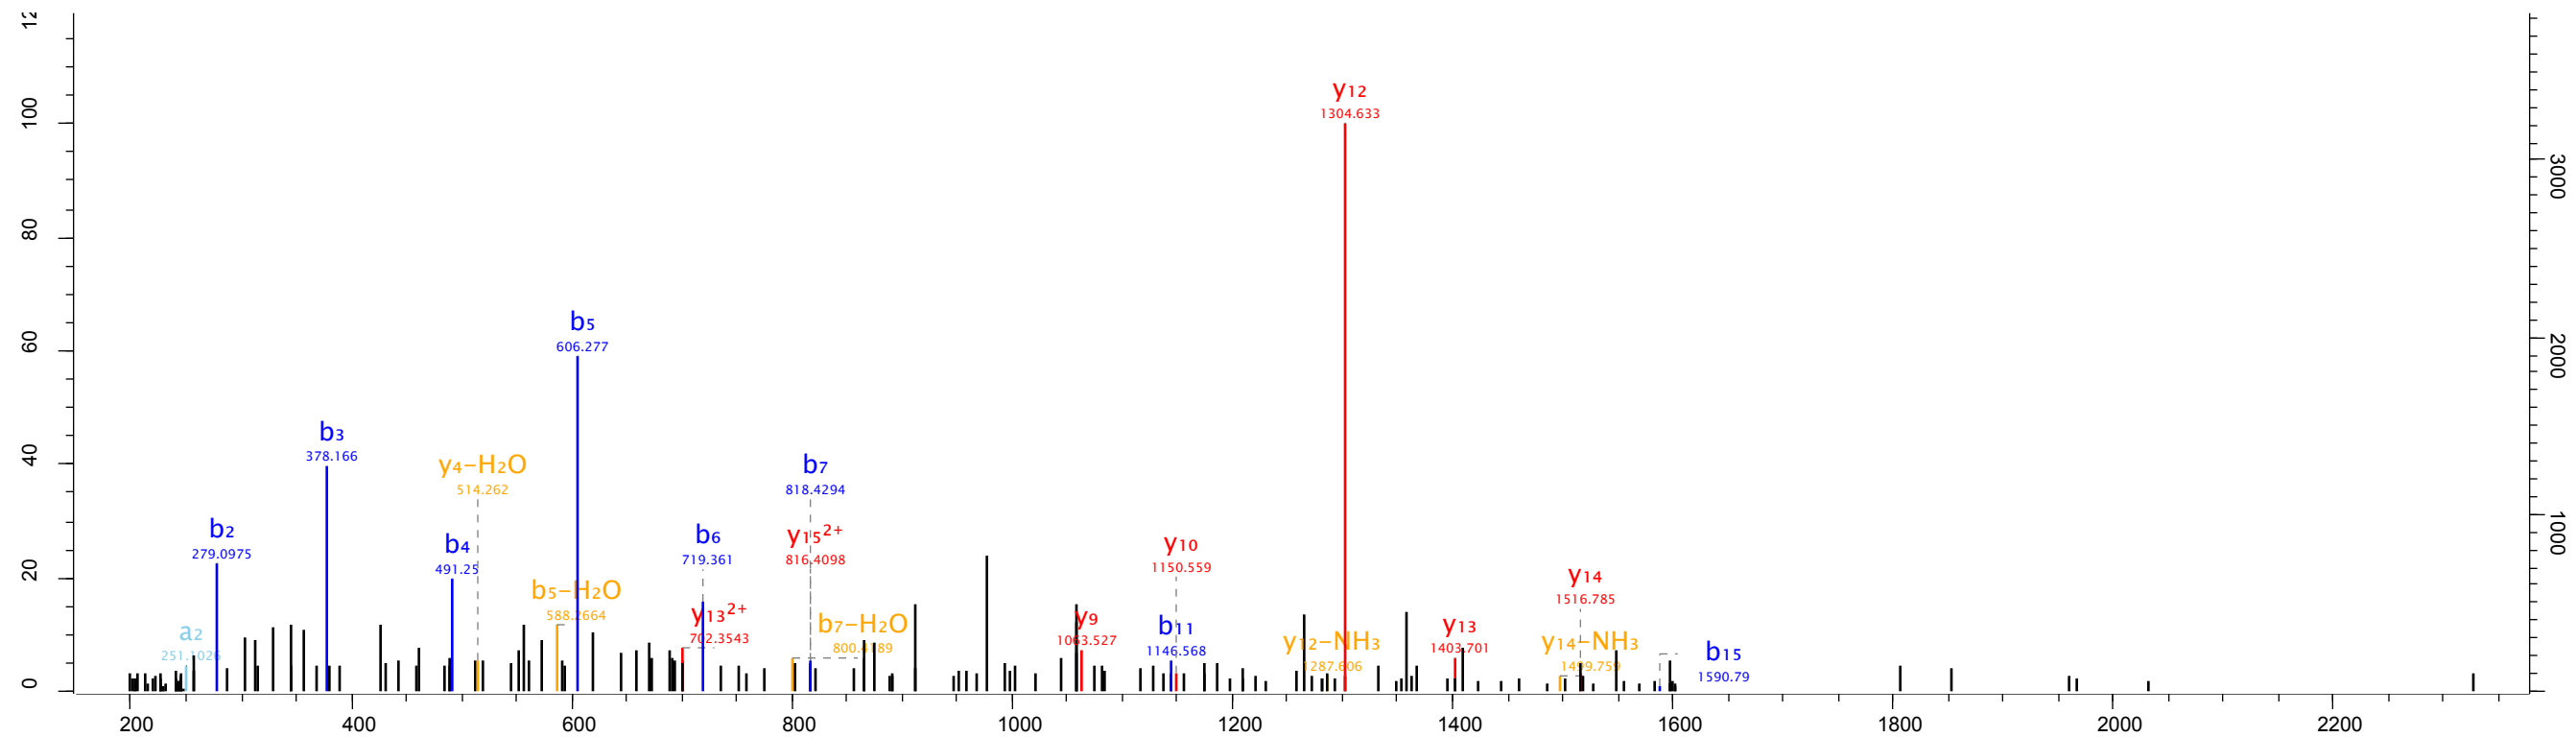



Raw file

UPS1+500ngY\_90minTop17\_BC4\_01\_358

| Scan  | Method   | Score | Mass    | Gene names |
|-------|----------|-------|---------|------------|
| 61330 | TOF; CID | 51.29 | 1181.68 | VPS29      |

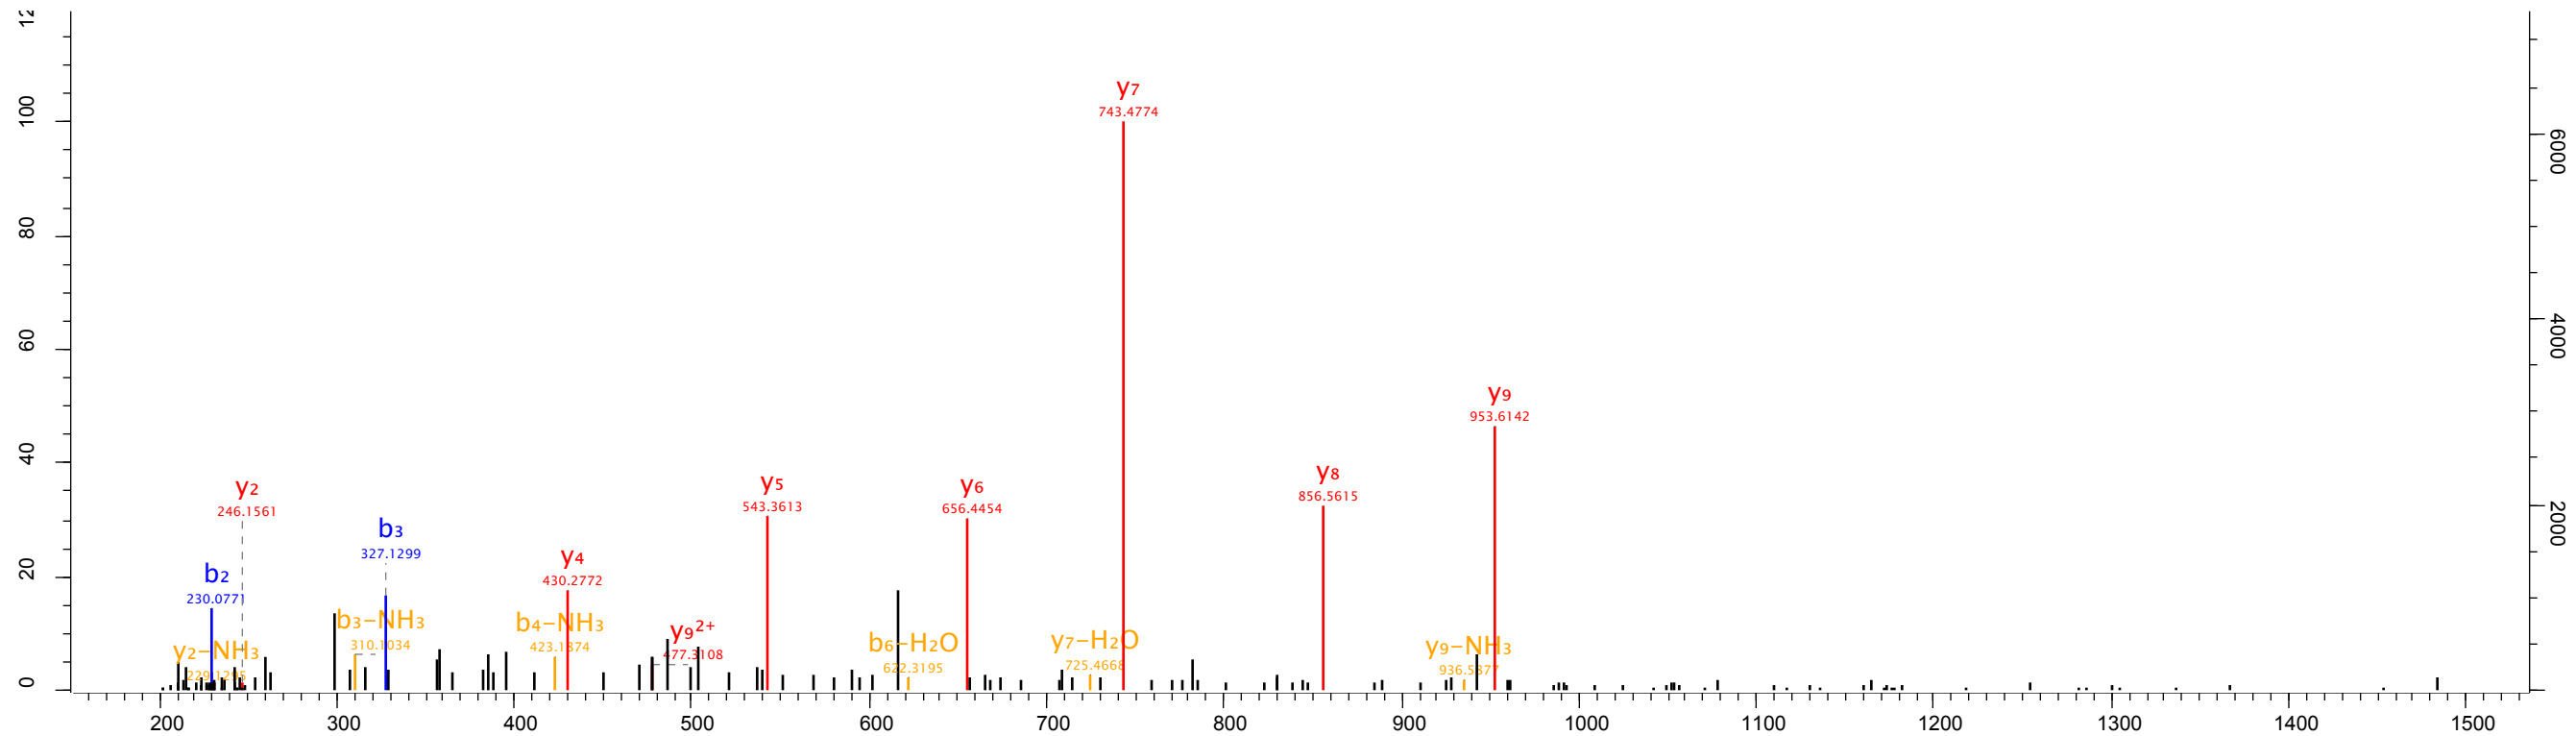

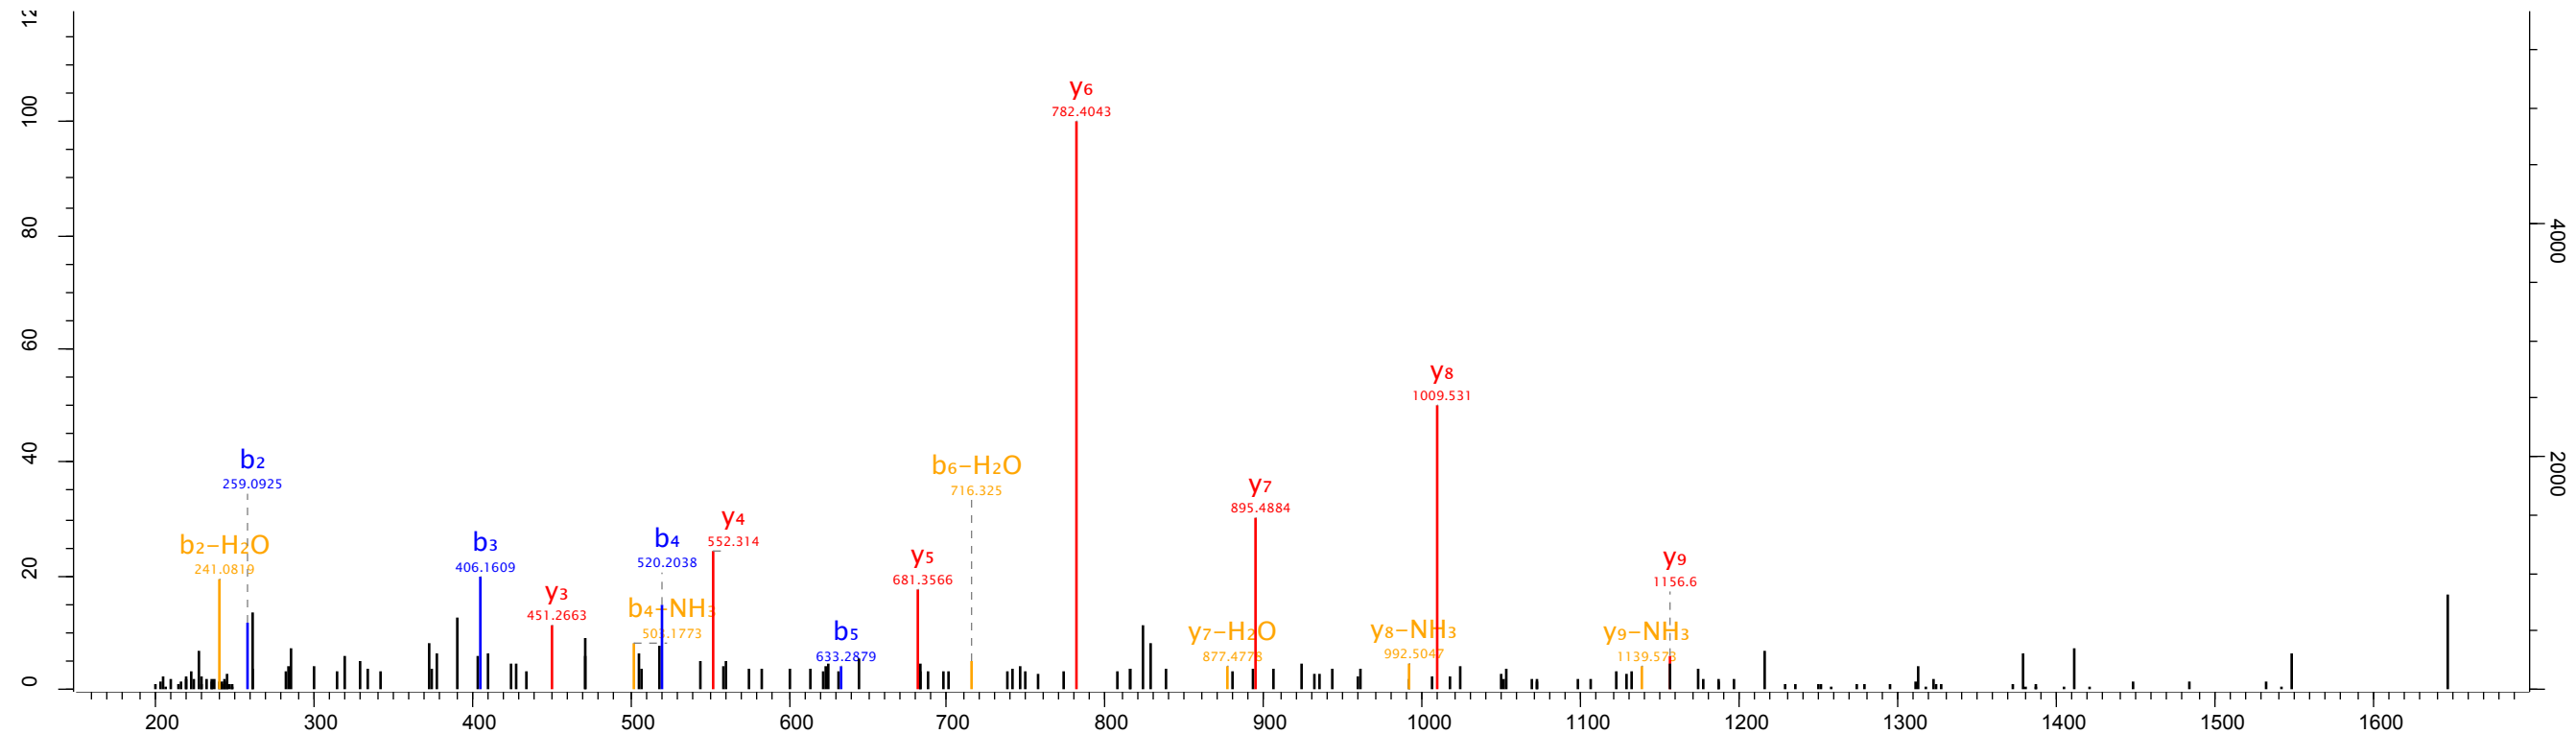

Raw file  
UPS1+500ngY\_90minTop17\_BC4\_01\_358

| Scan  | Method   | Score | Mass    | Gene names |
|-------|----------|-------|---------|------------|
| 62110 | TOF; CID | 67.7  | 1183.66 | APT2       |

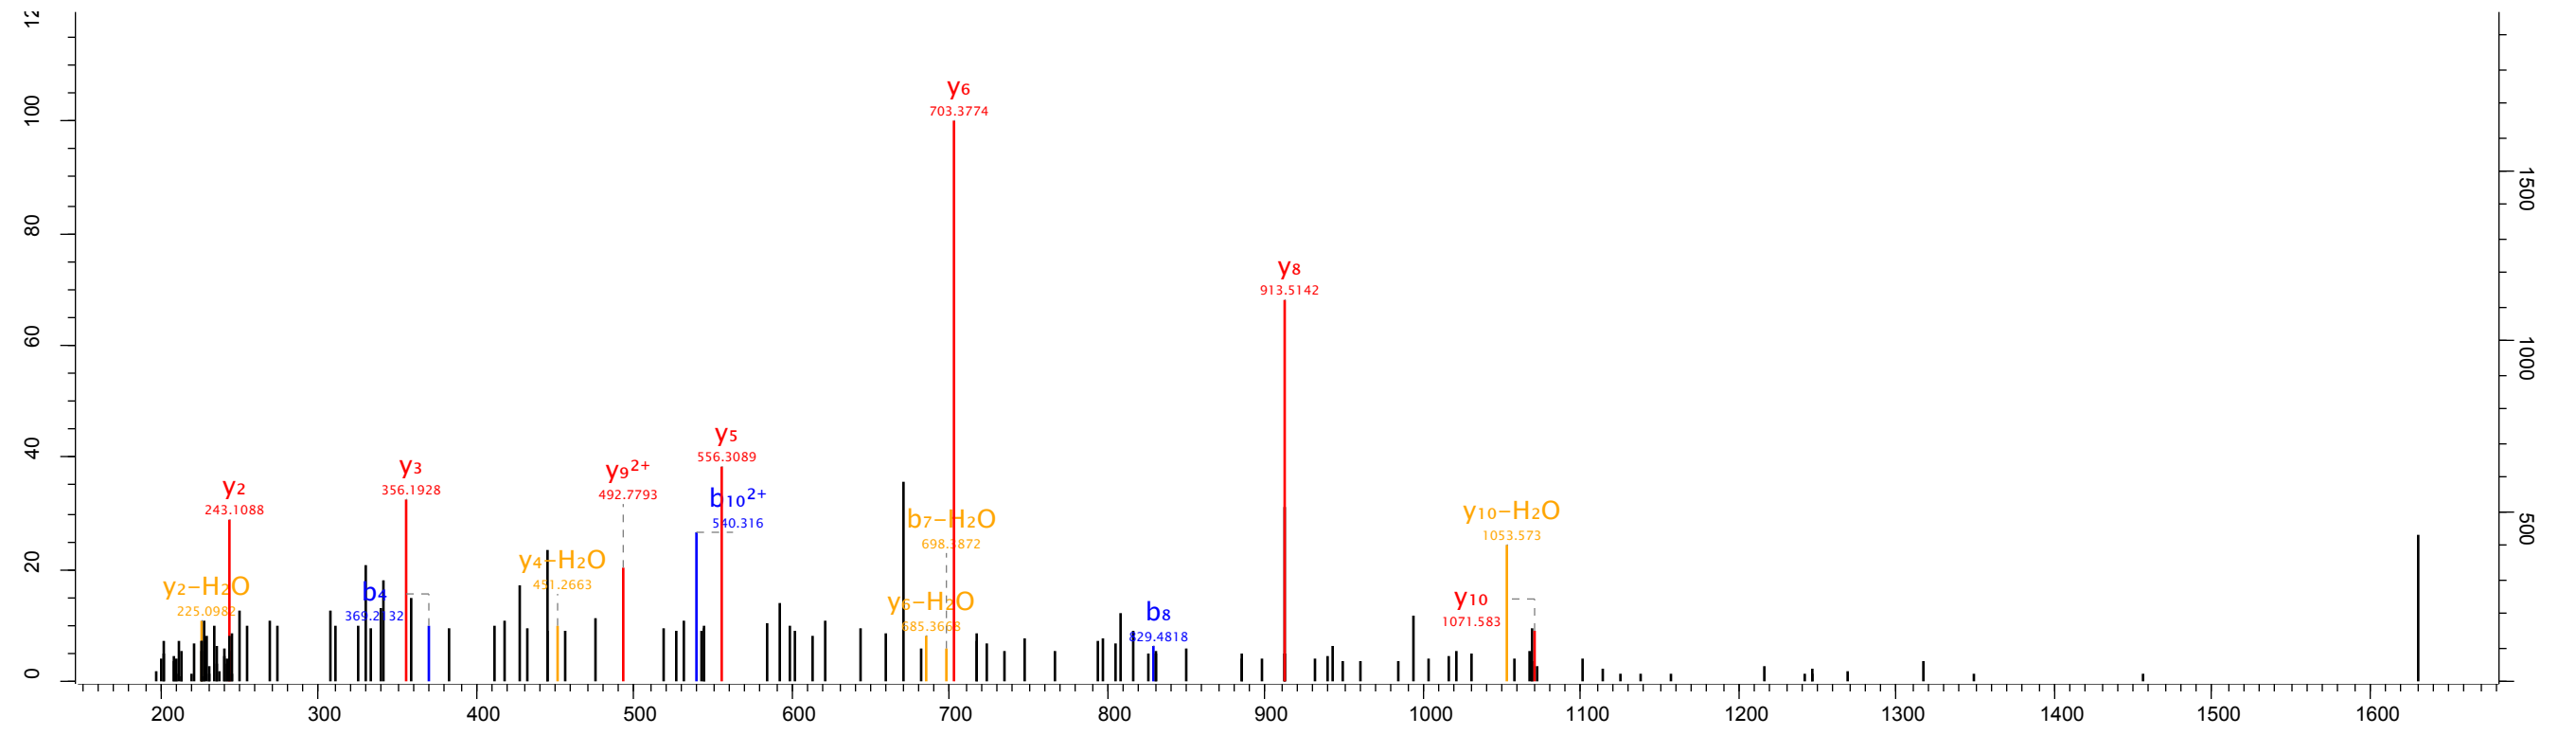

Raw file  
UPS1+500ngY\_90minTop17\_BC4\_01\_358

Scan 62770 Method TOF; CID Score 51.31 Mass 2369.07 Gene names RCL1

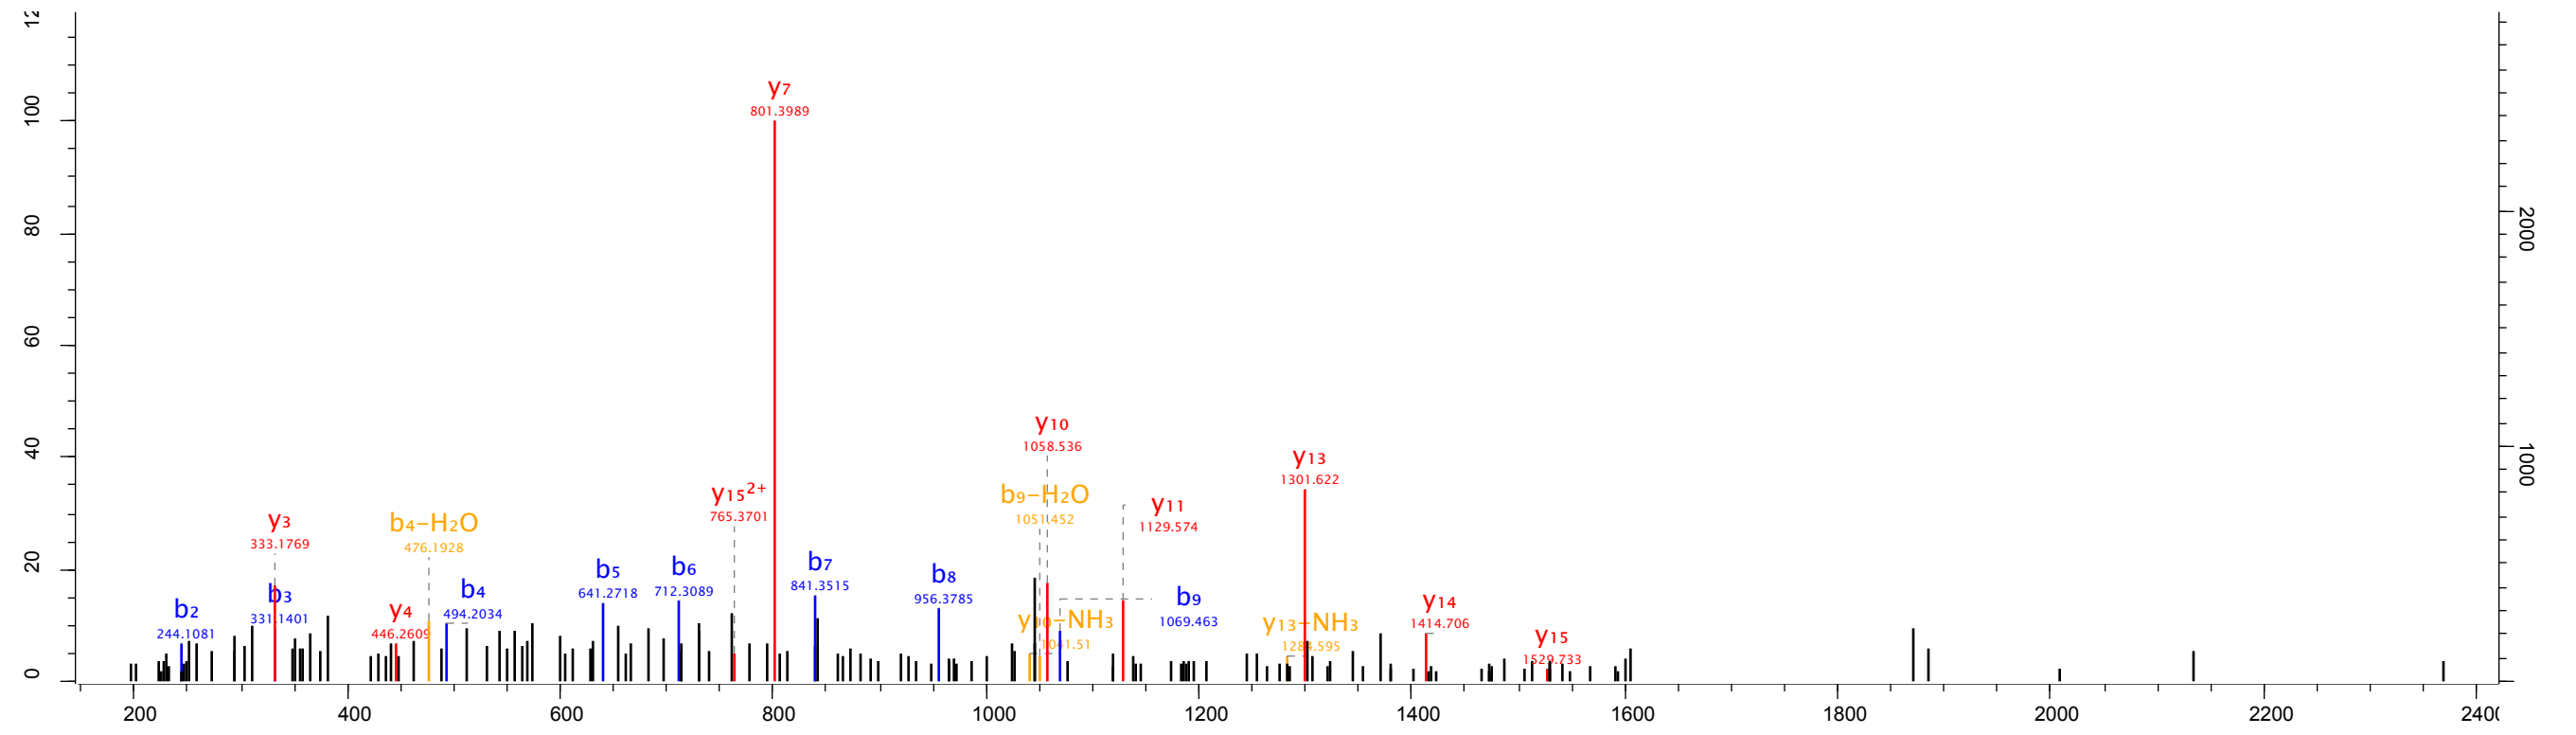

Raw file

UPS1+500ngY\_90minTop17\_BC4\_01\_358

| Scan  | Method   | Score | Mass    | Gene names |
|-------|----------|-------|---------|------------|
| 62827 | TOF; CID | 70.2  | 1796.92 | GIS1       |

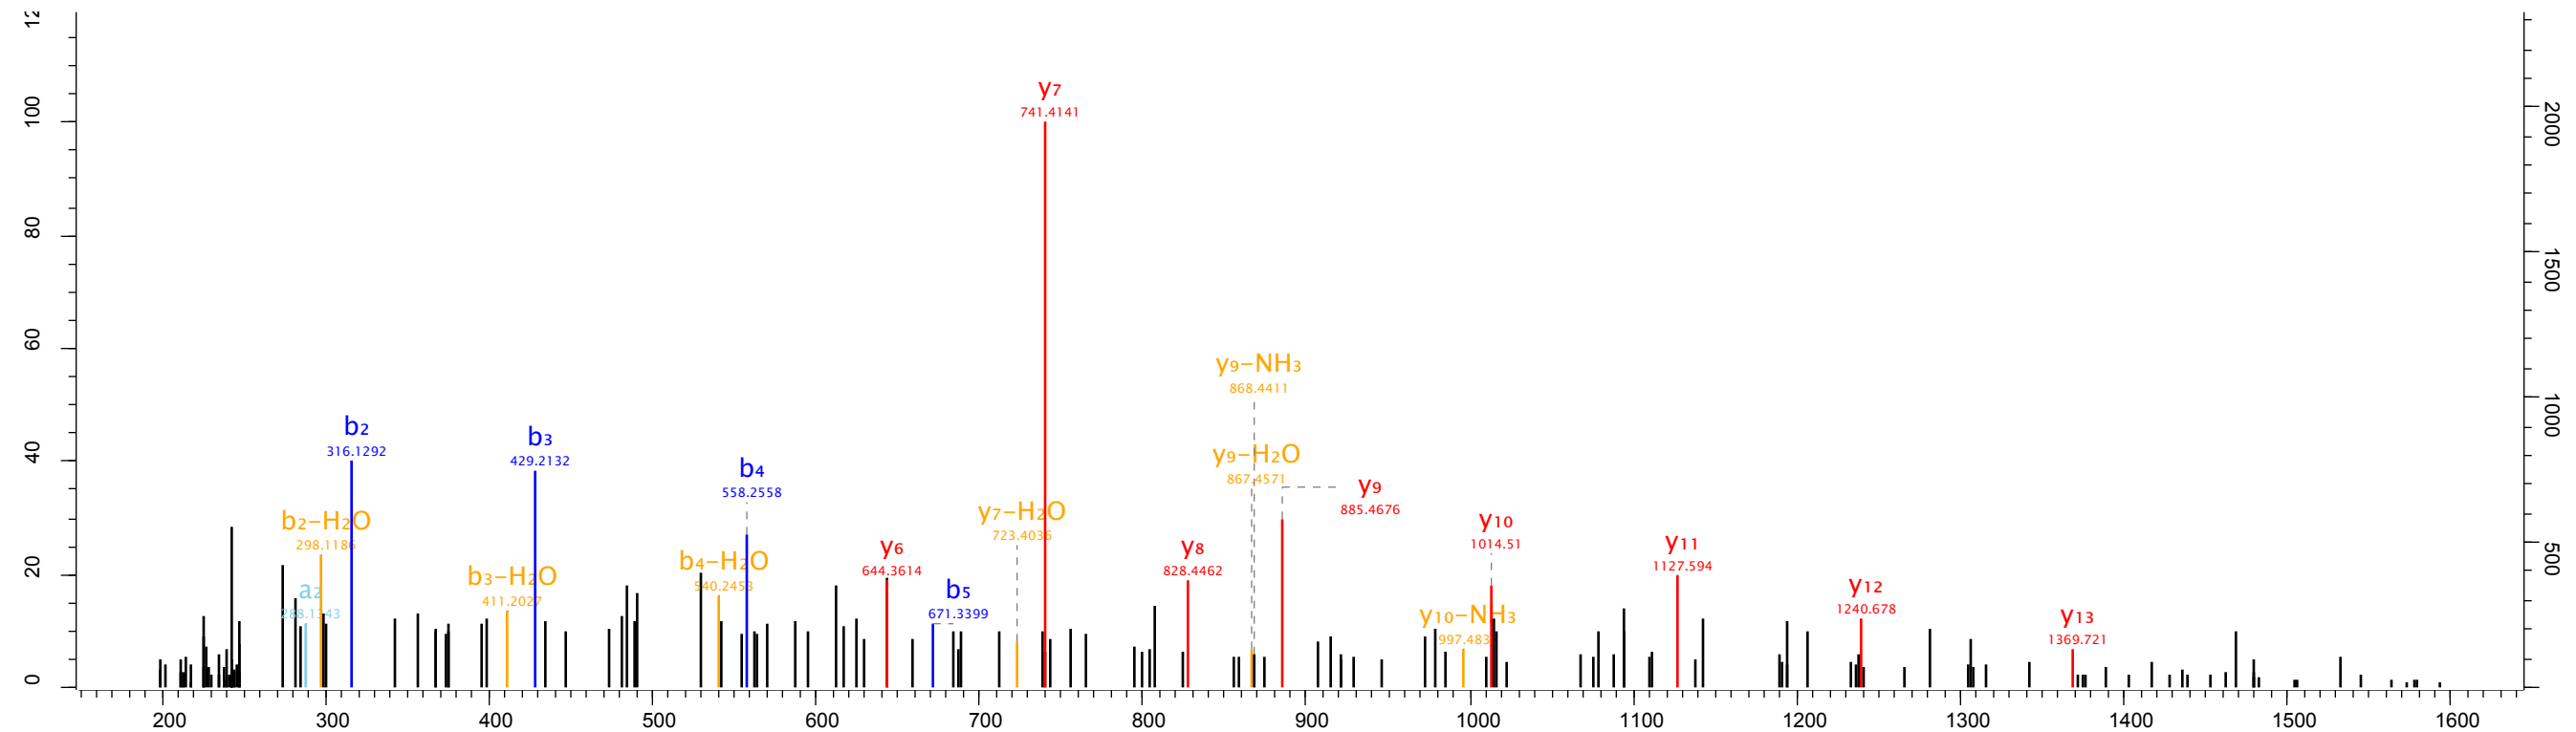

UPS1+500ngY\_90minTop17\_BC4\_01\_358

Scan: 62912  
Method: TOF; CID  
Score: 52.28  
Mass: 3631.66  
Gene names: YIP4

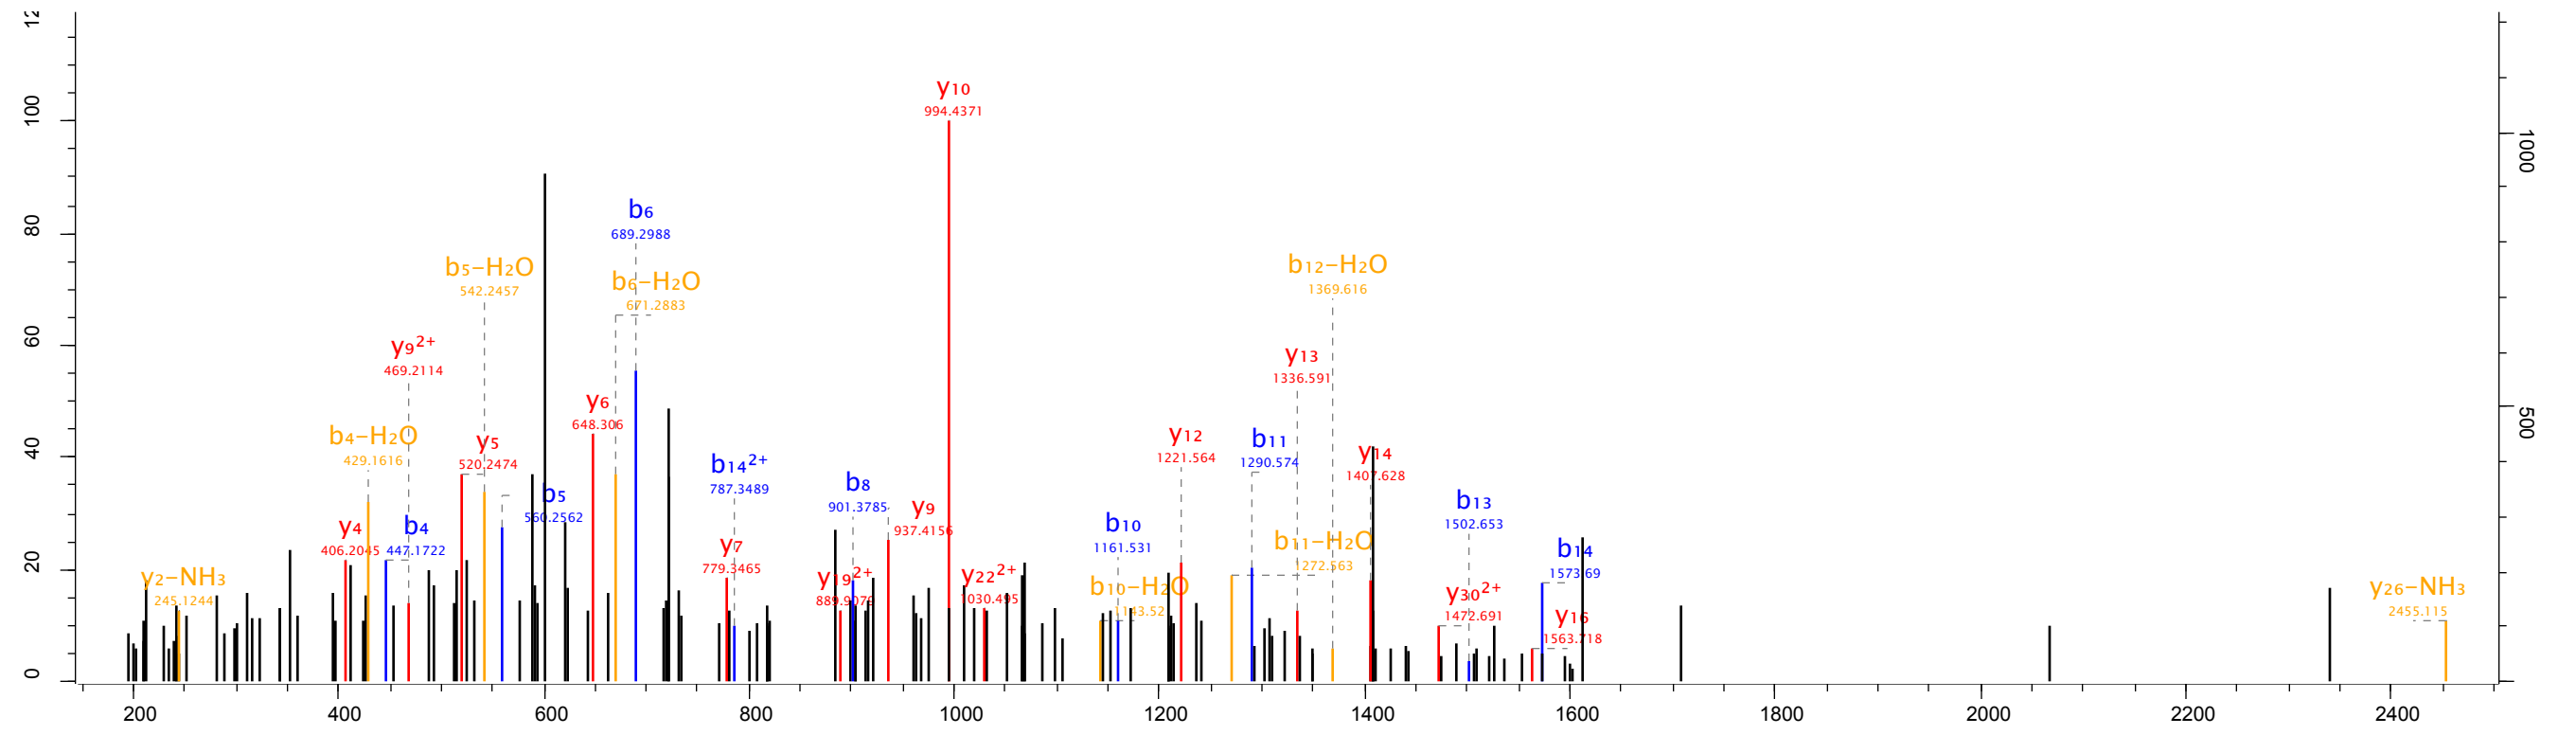

UPS1+500ngY\_90minTop17\_BC4\_01\_358

62936 TOF; CID 73.14 2330.97 UGO1

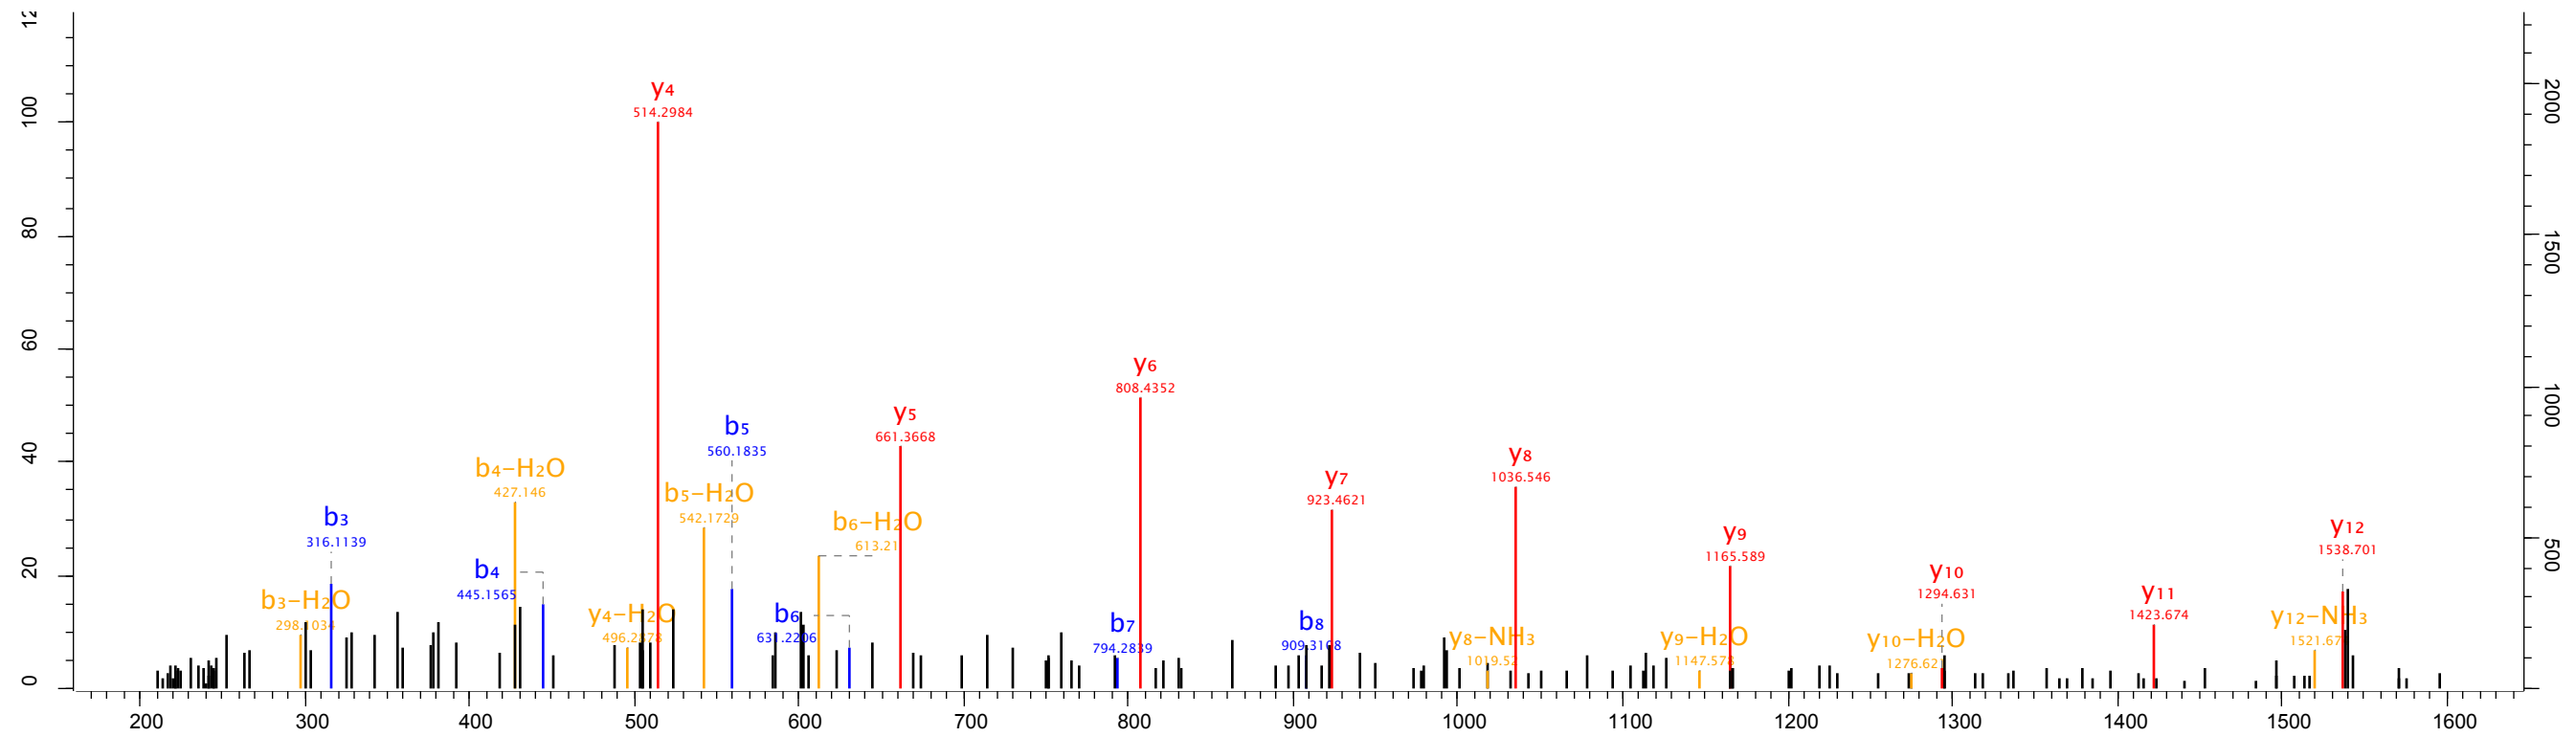

Raw file  
UPS1+500ngY\_90minTop17\_BC4\_01\_358

Scan 62998 Method TOF; CID Score 79.87 Mass 1385.78 Gene names PSK1

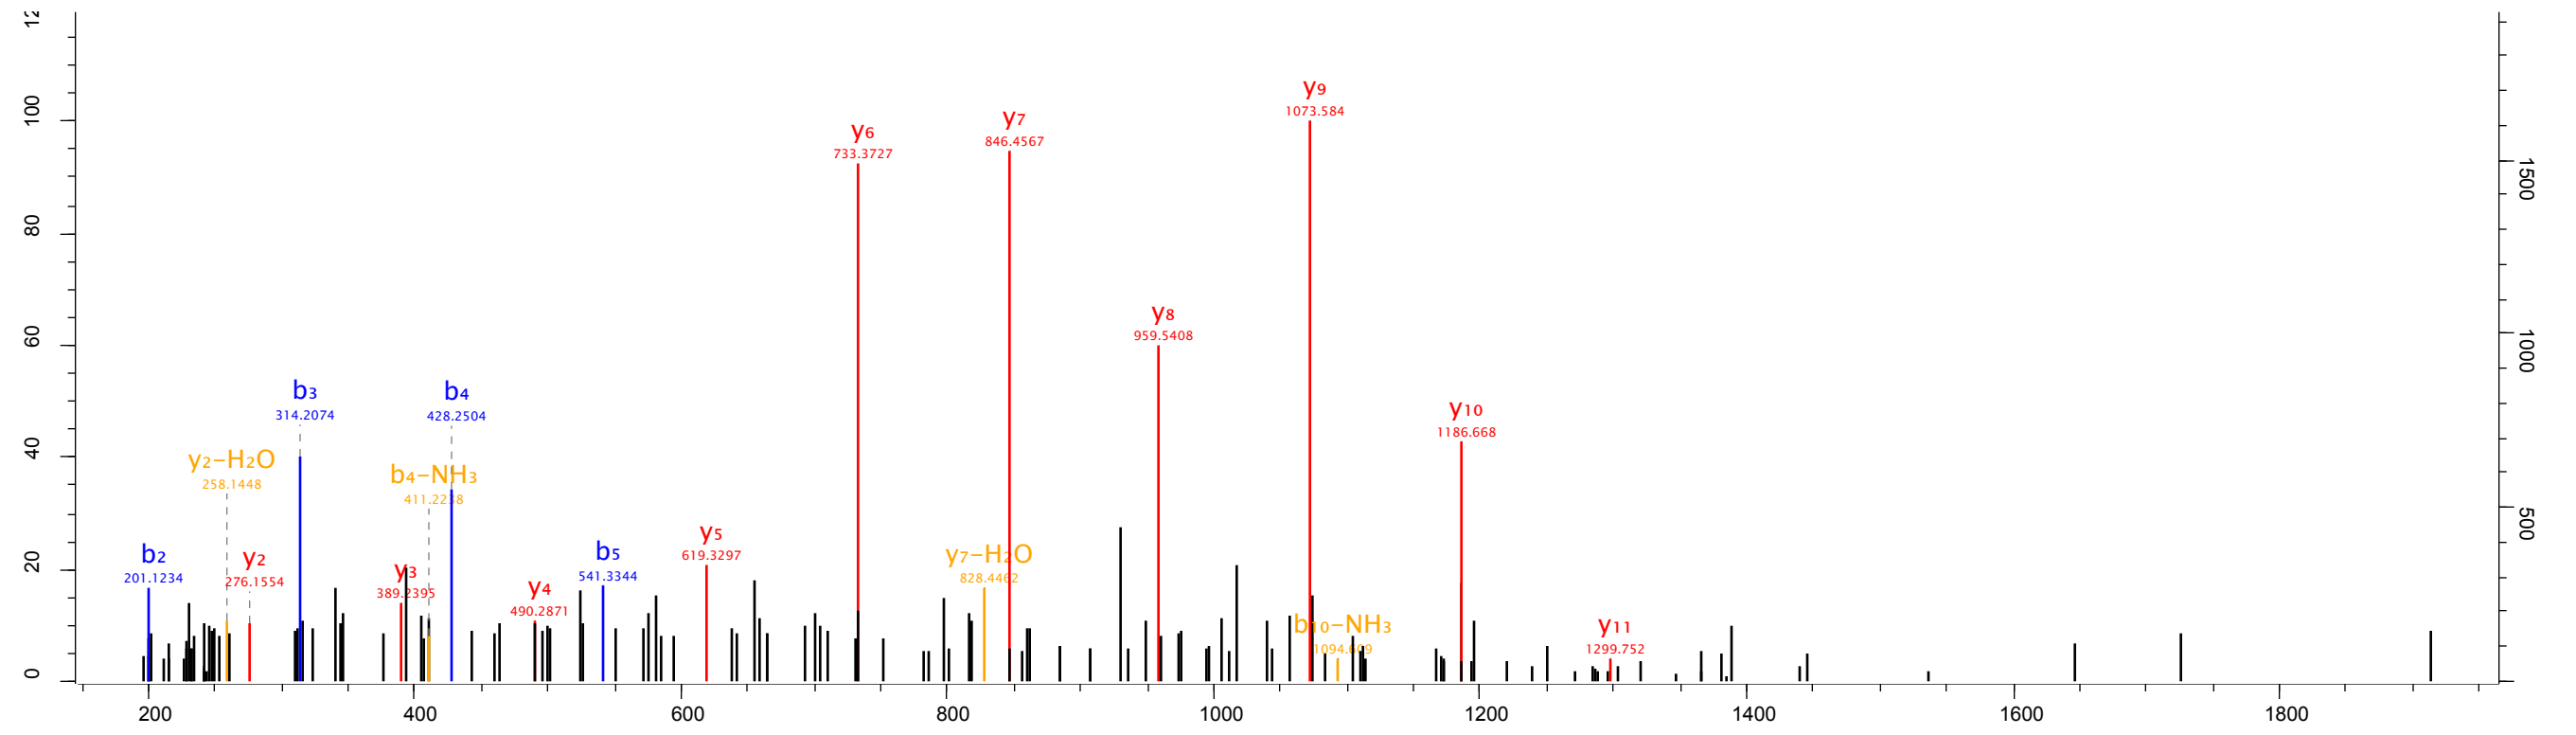



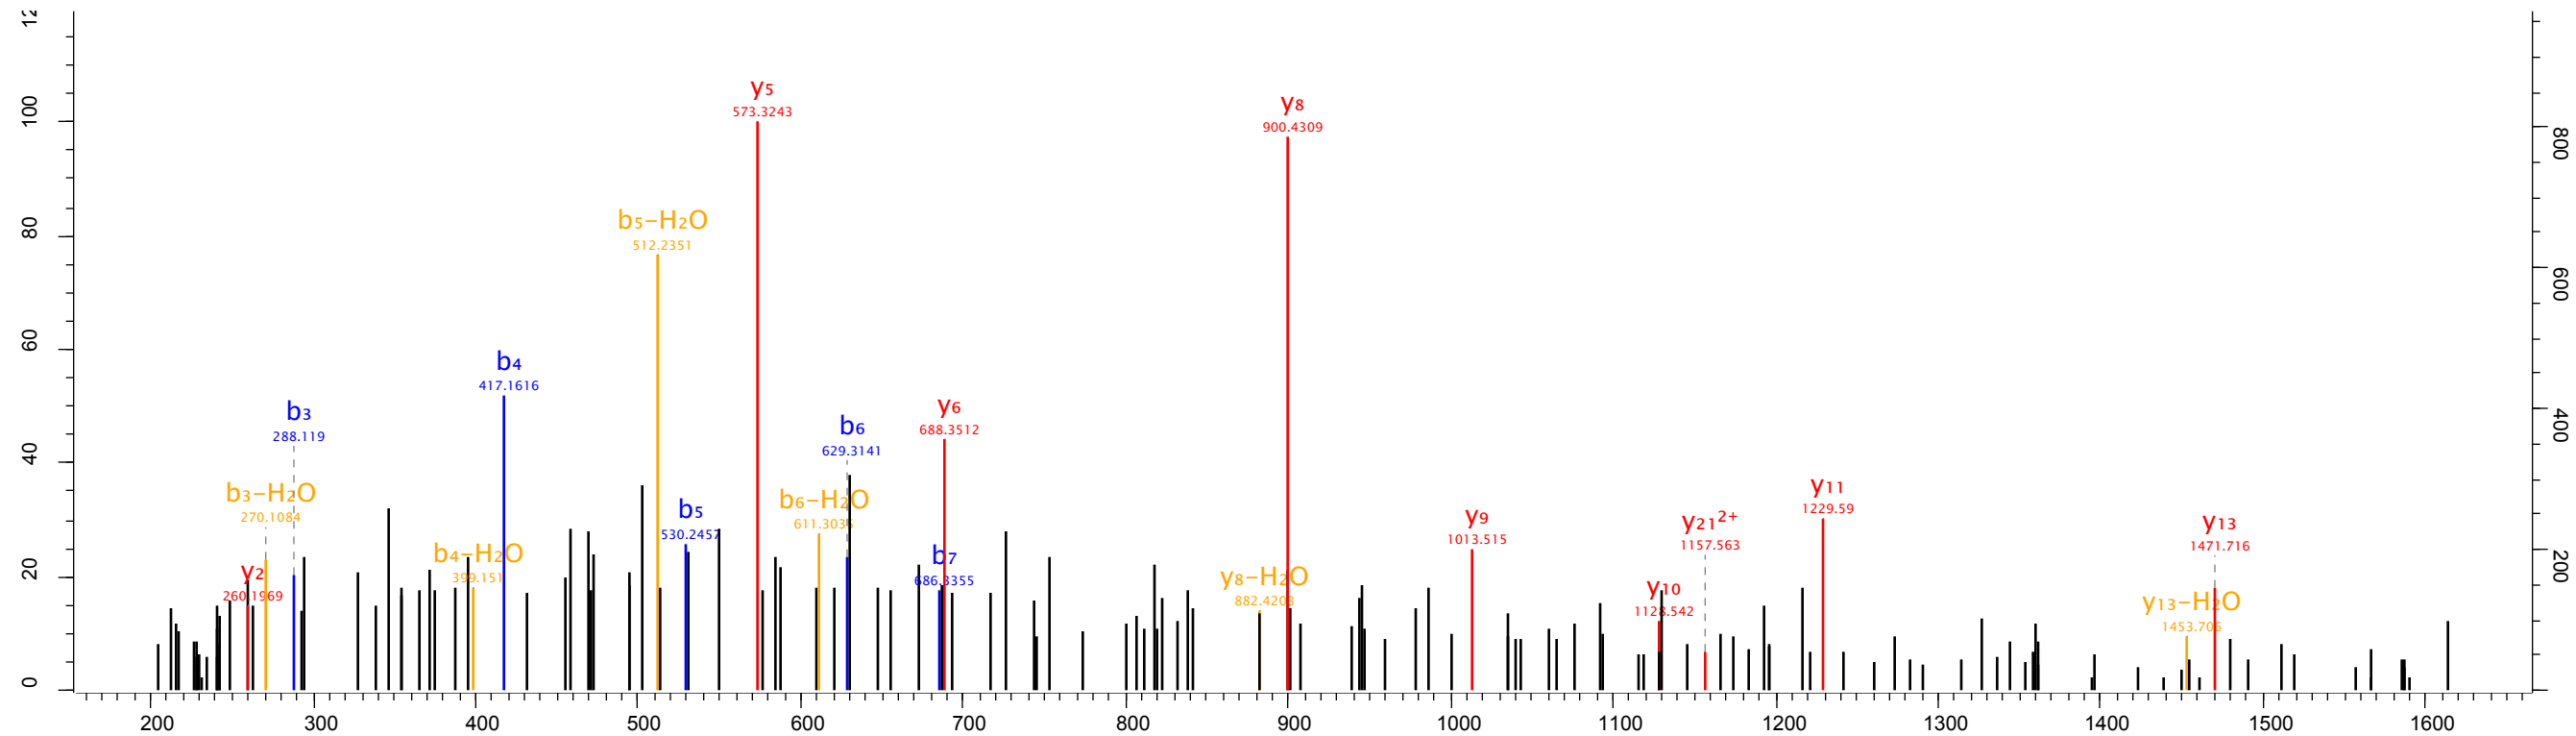

Raw file  
UPS1+500ngY\_90minTop17\_BC4\_01\_358

Scan 63471 Method TOF; CID Score 42.63 Mass 2032.93 Gene names LSM3

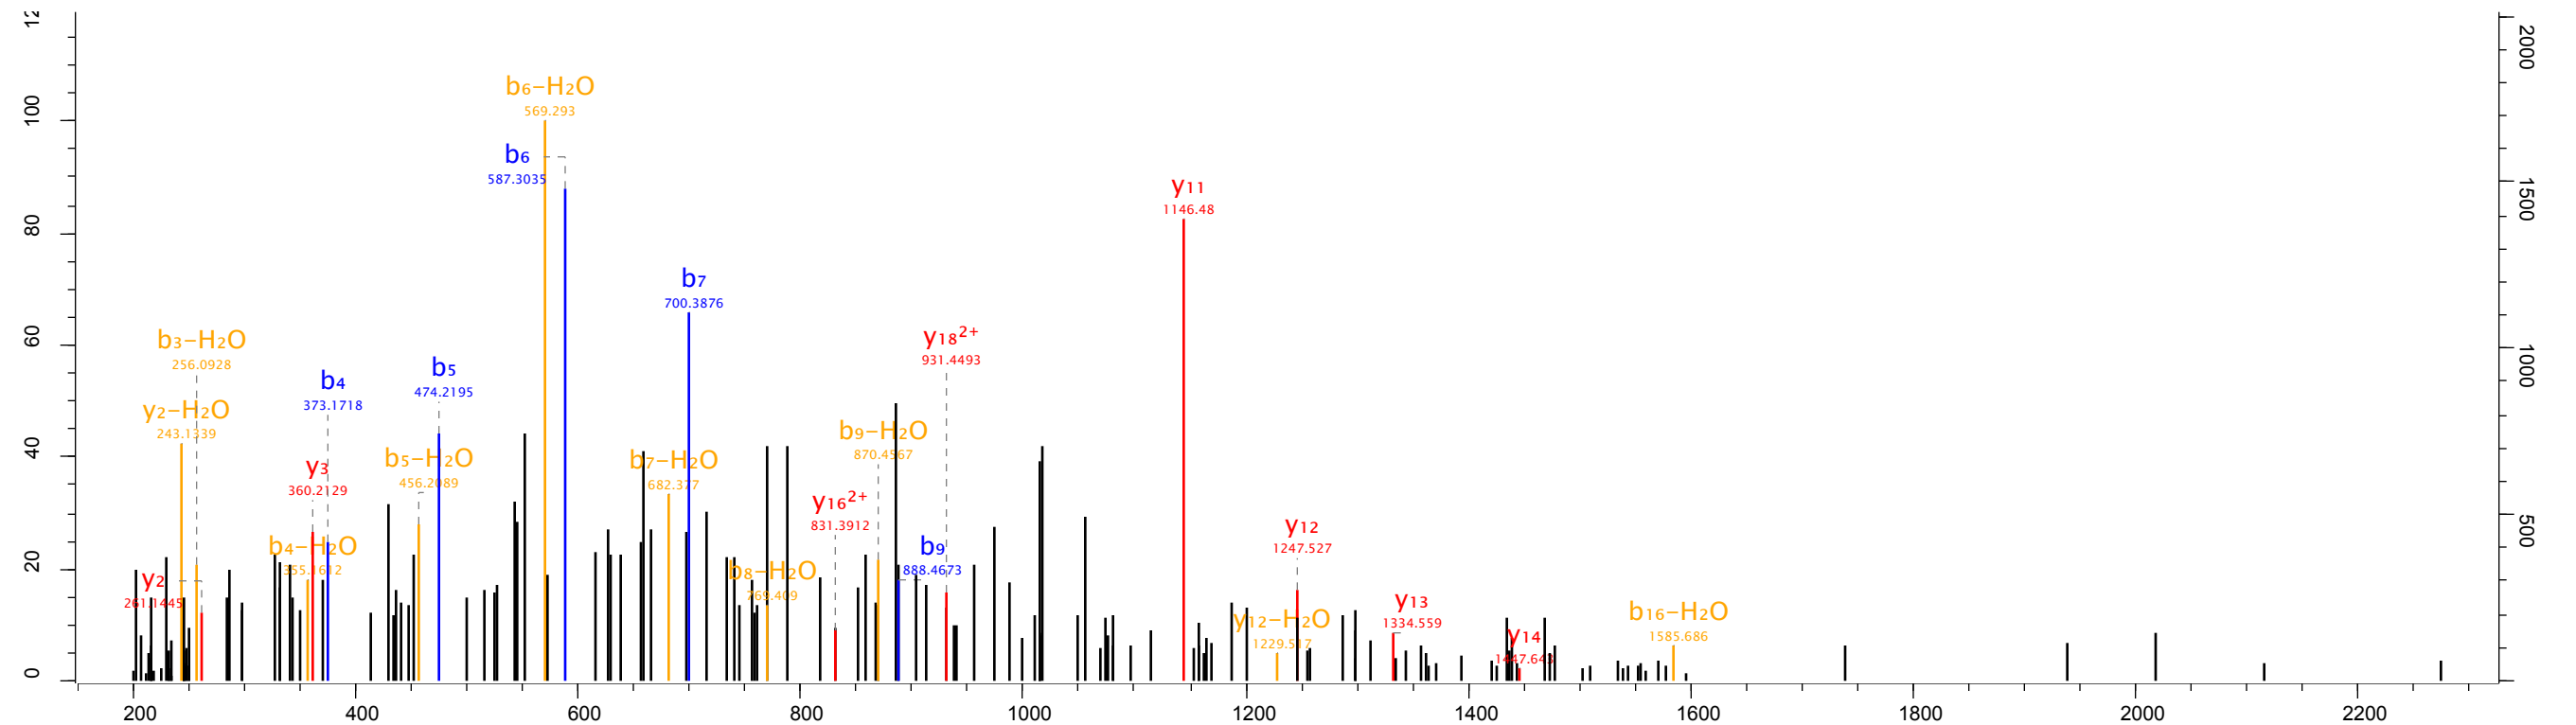

Raw file  
UPS1+500ngY\_90minTop17\_BC4\_01\_358

Scan 63480 Method TOF; CID Score 71.18 Mass 1359.7 Gene names YMR31

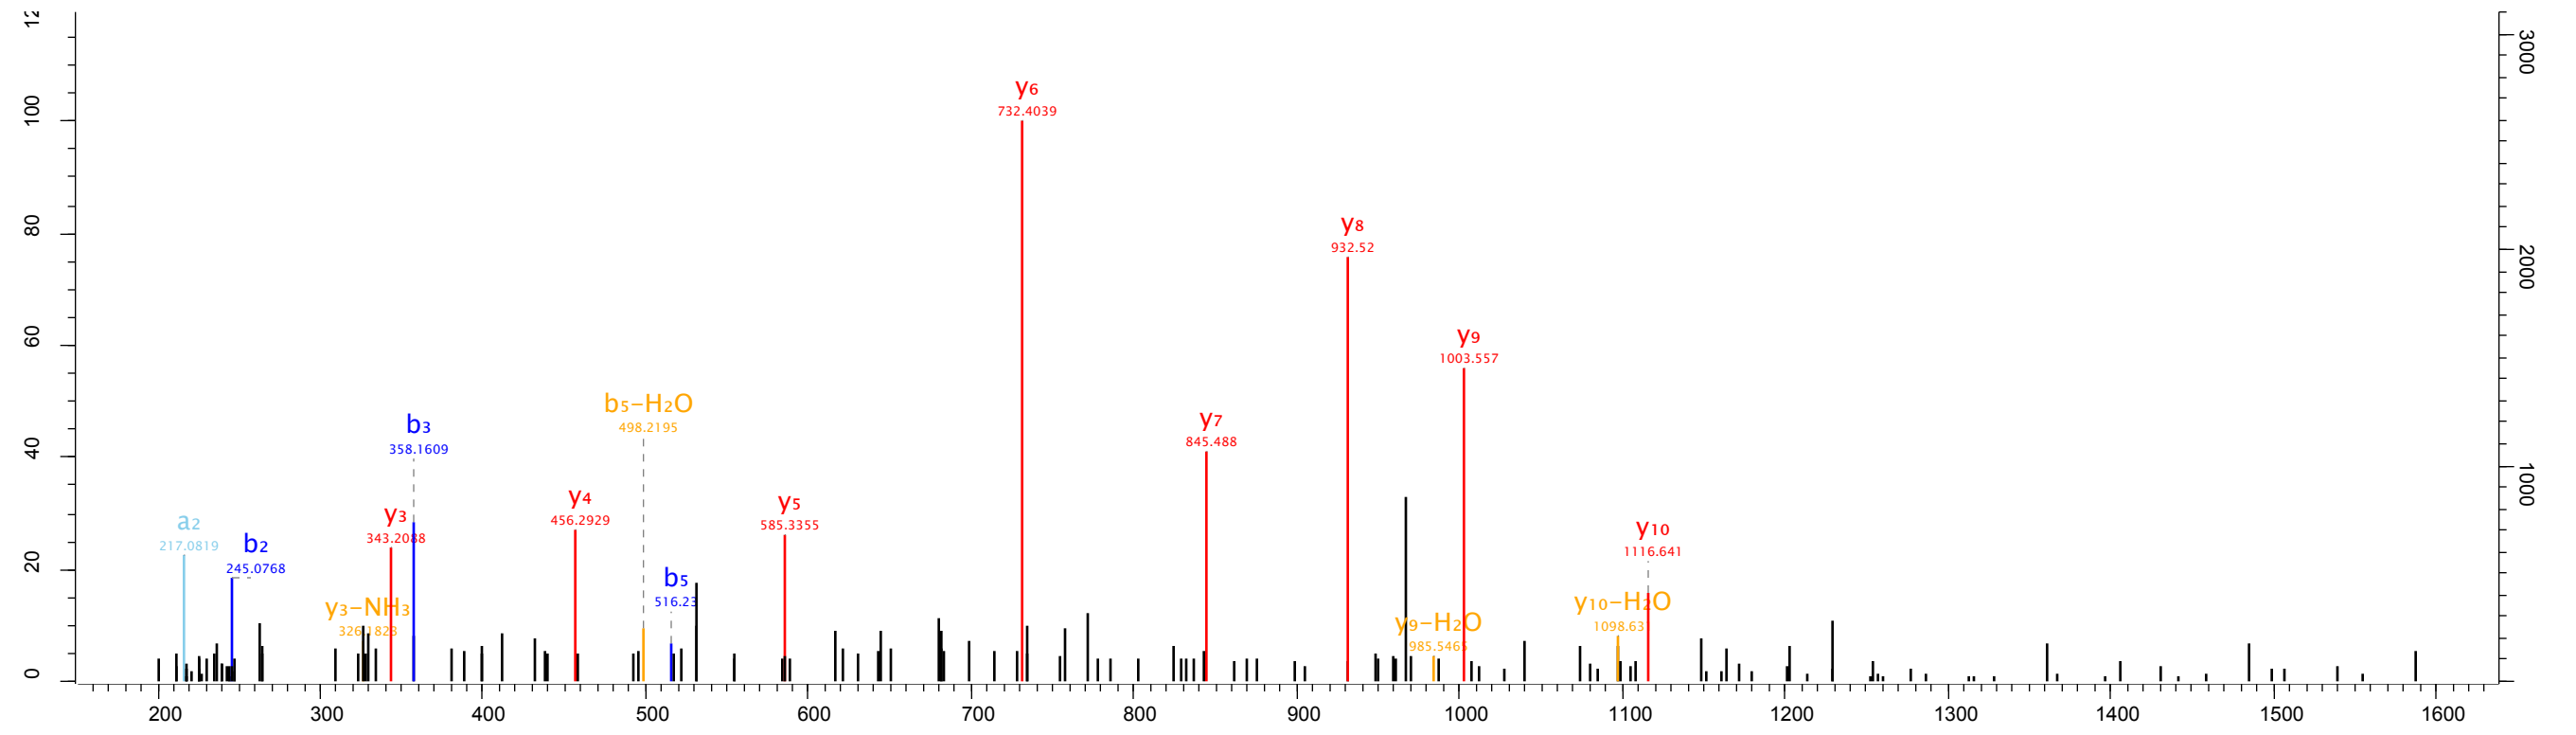

Raw file

UPS1+500ngY\_90minTop17\_BC4\_01\_358

Scan

Method

Score

Mass

Gene names

63566

TOF; CID

57.41

2260.02

MVP1

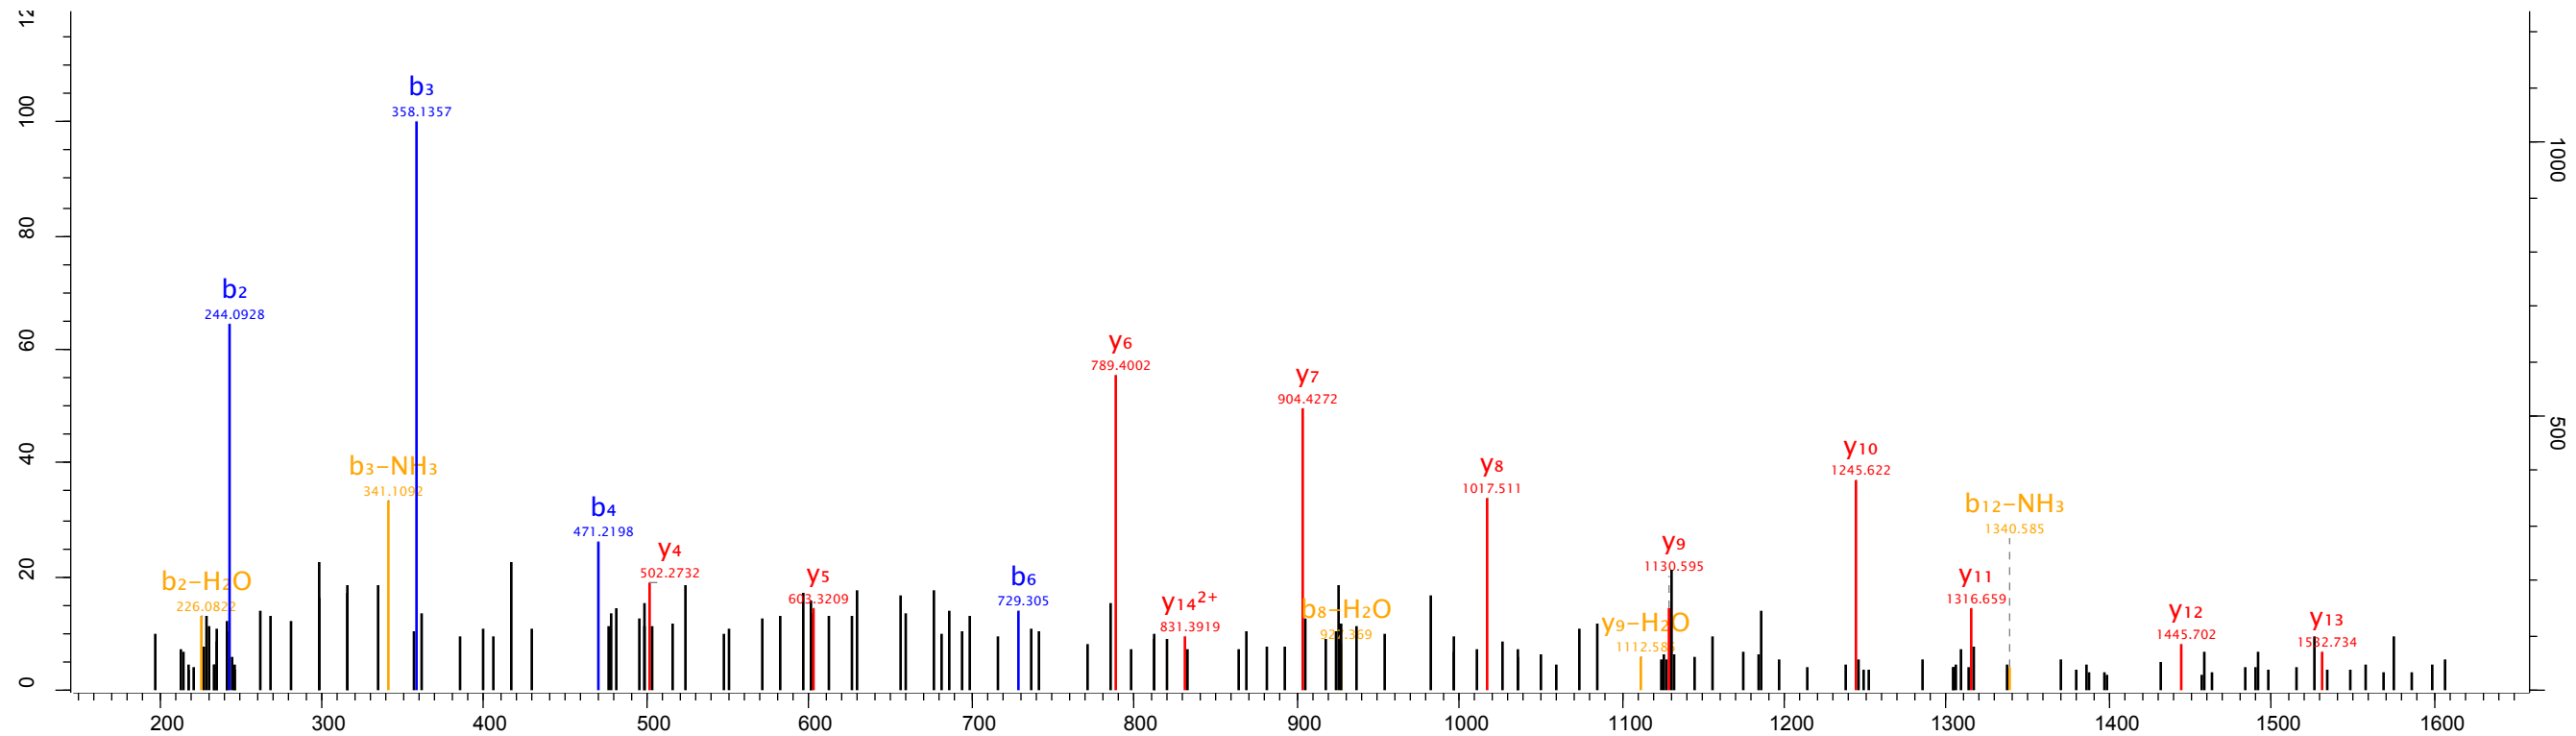

Raw file  
UPS1+500ngY\_90minTop17\_BC4\_01\_358

| Scan  | Method   | Score | Mass    | Gene names |
|-------|----------|-------|---------|------------|
| 64631 | TOF; CID | 45.62 | 1888.98 | RXT2       |

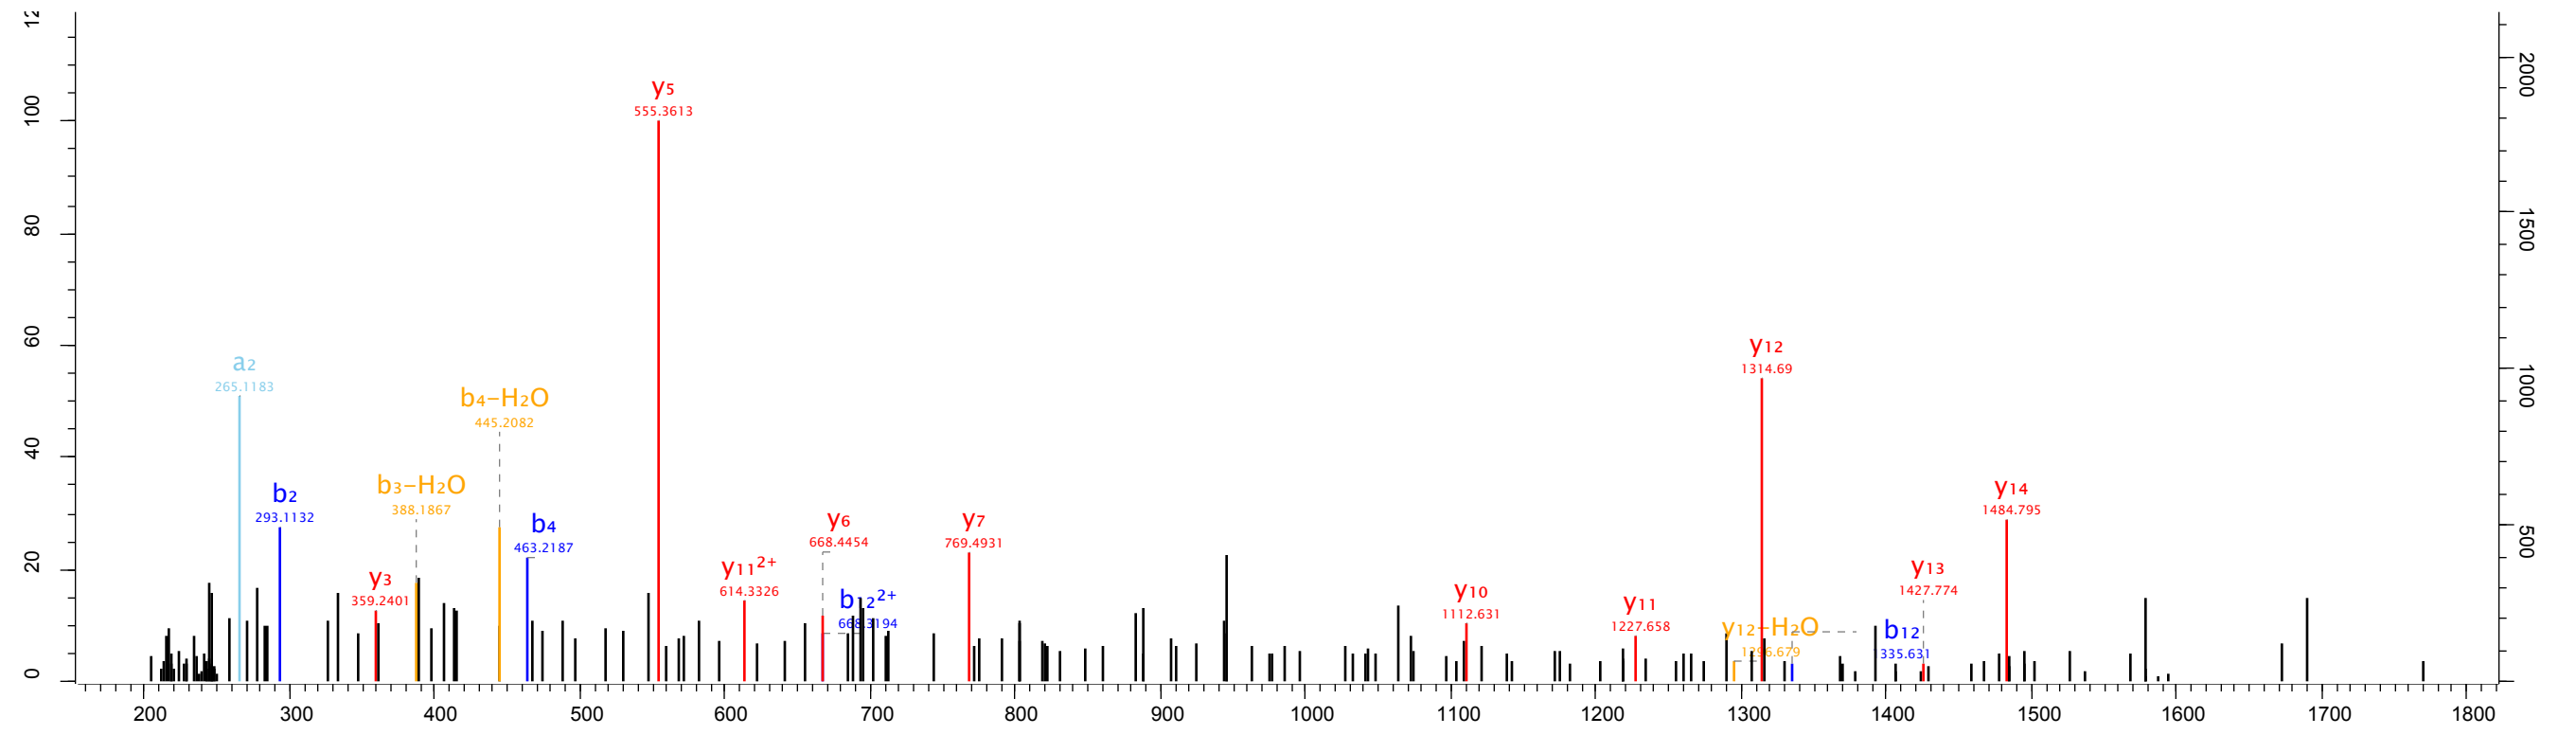

Raw file

UPS1+500ngY\_90minTop17\_BC4\_01\_358

Scan 65236 Method TOF; CID Score 55.44 Mass 1822.9 Gene names LAC1

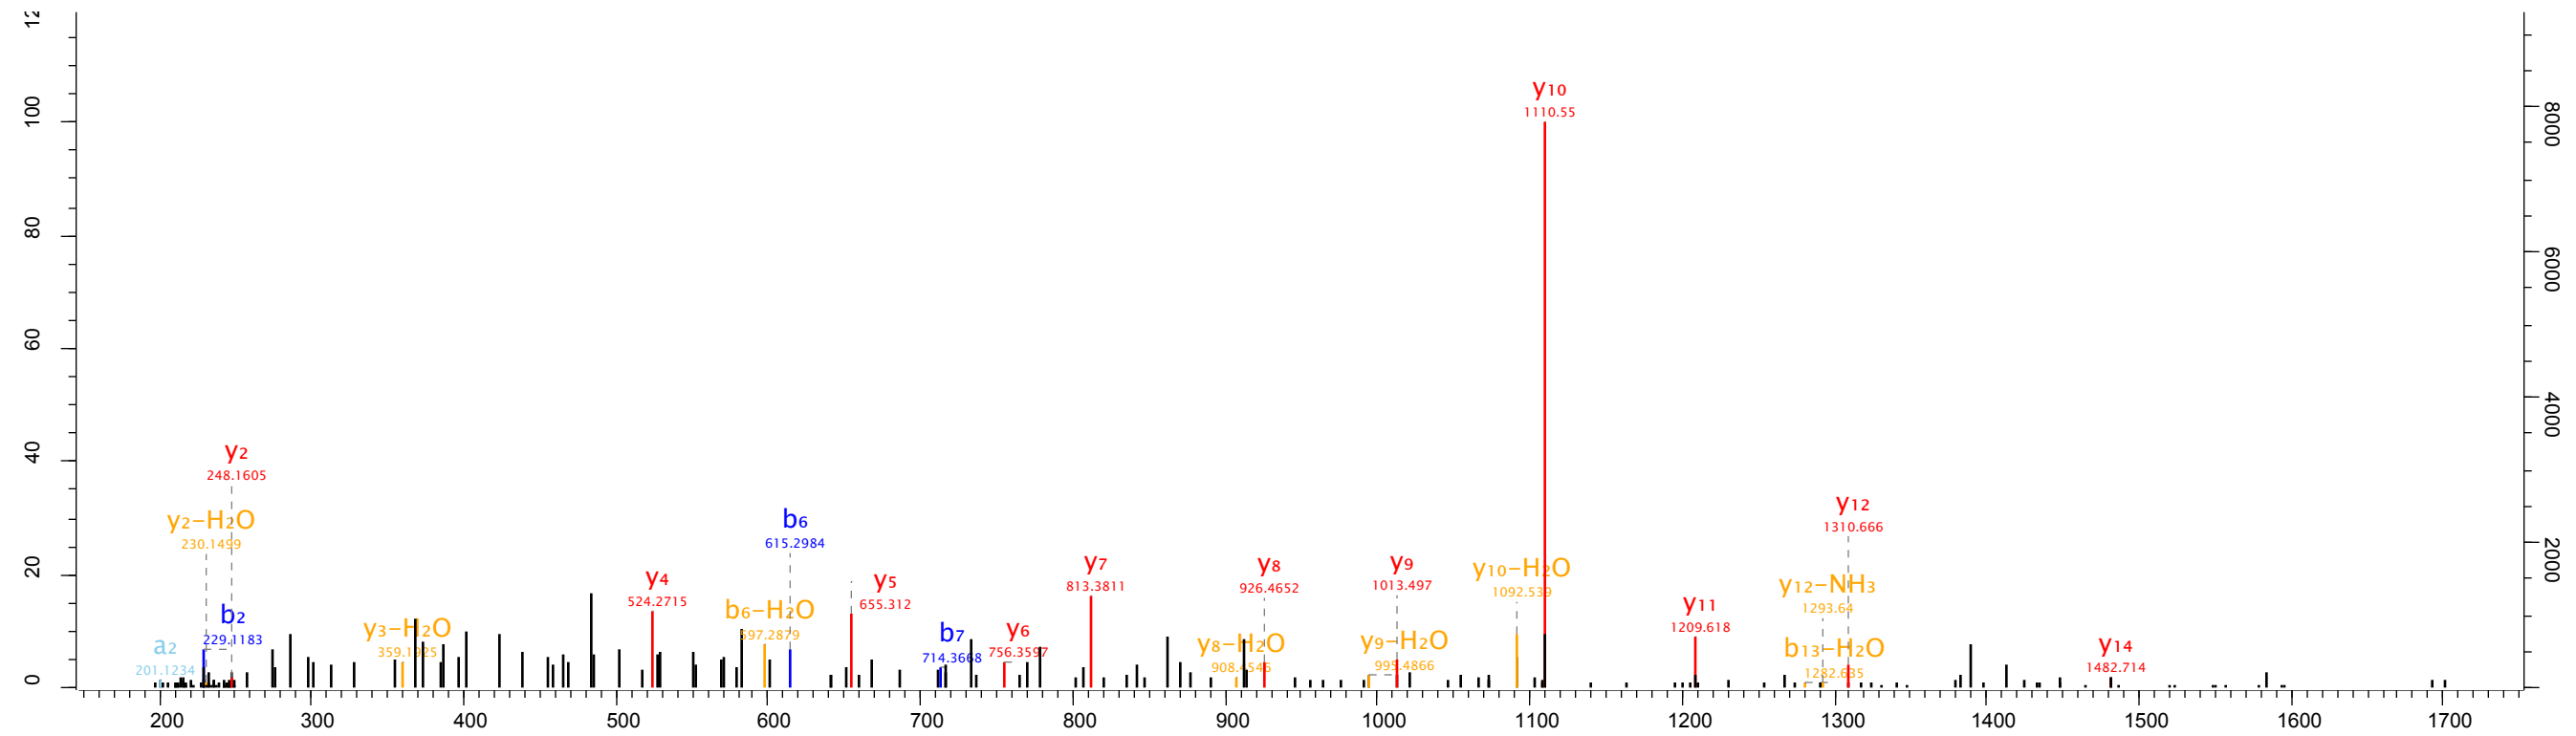

Raw file

UPS1+500ngY\_90minTop17\_BC4\_01\_358

Scan 65844 Method TOF; CID Score 45.99 Mass 2480.17 Gene names RPB10

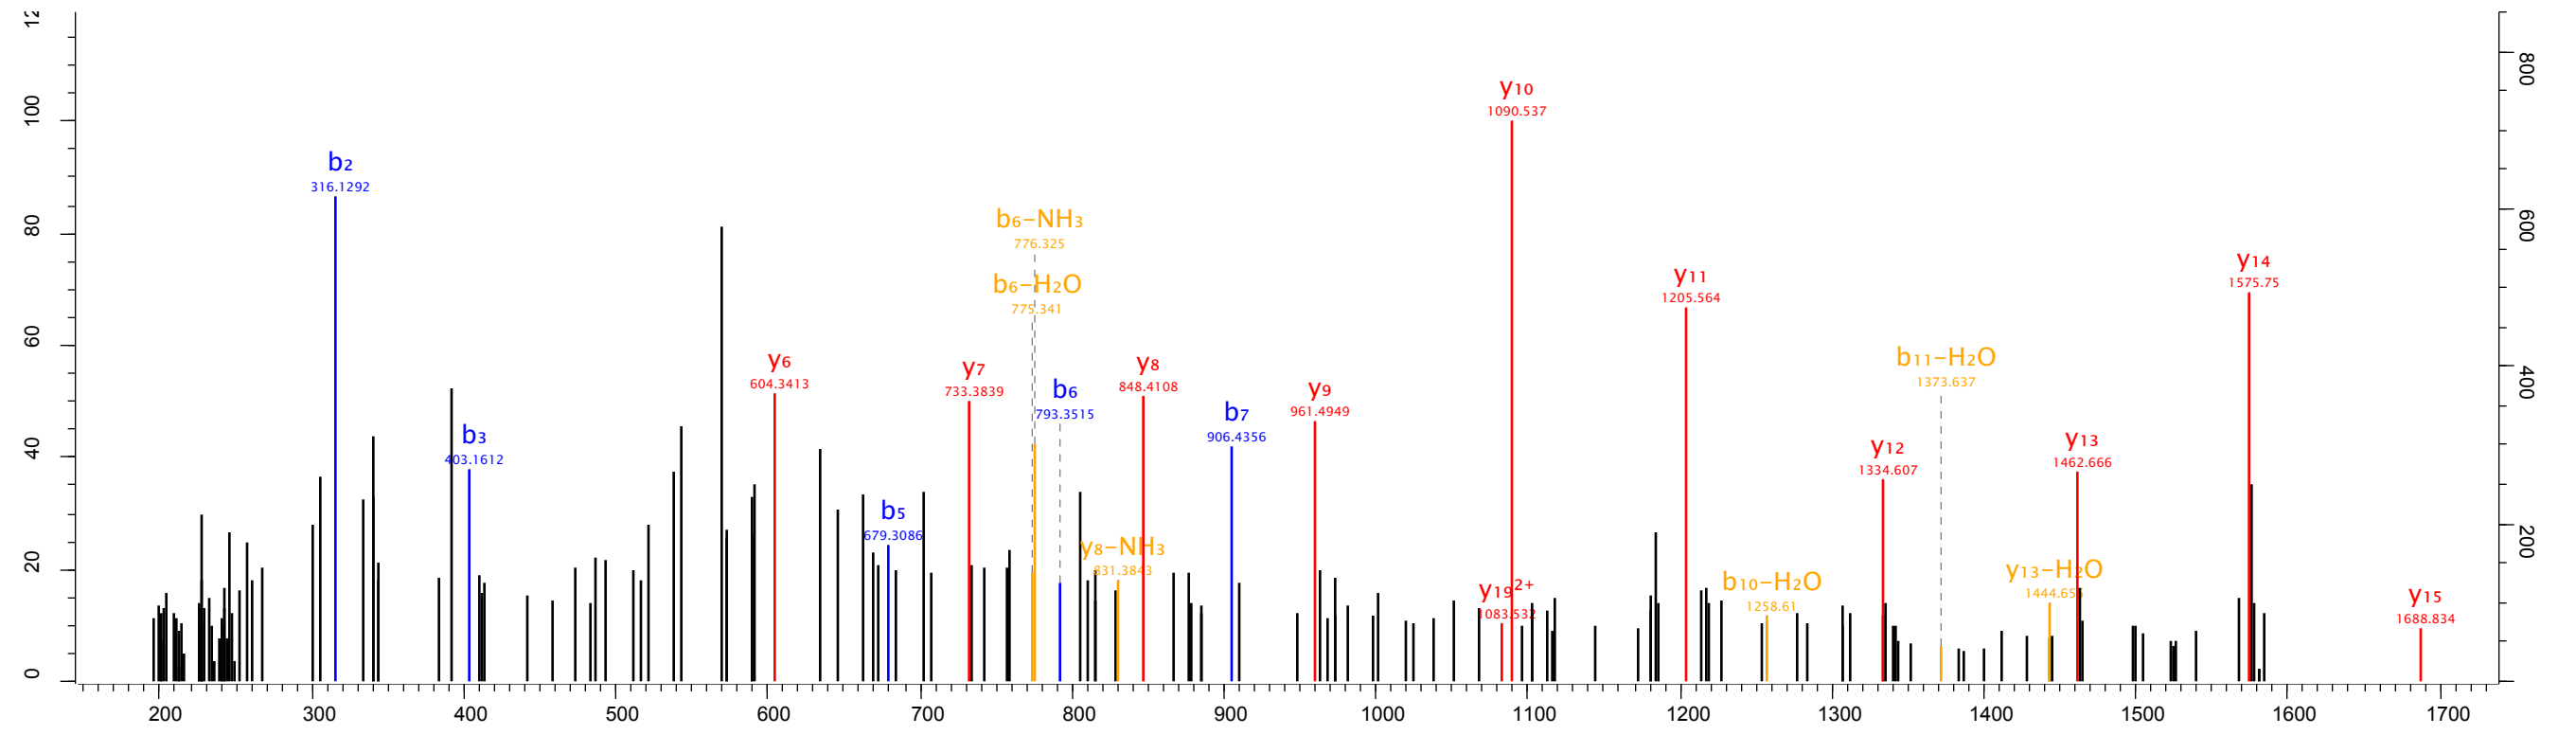

Raw file

UPS1+500ngY\_90minTop17\_BC4\_01\_358

Scan

Method

Score

Mass

Gene names

66164

TOF; CID

49.59

1688.88

BUD14

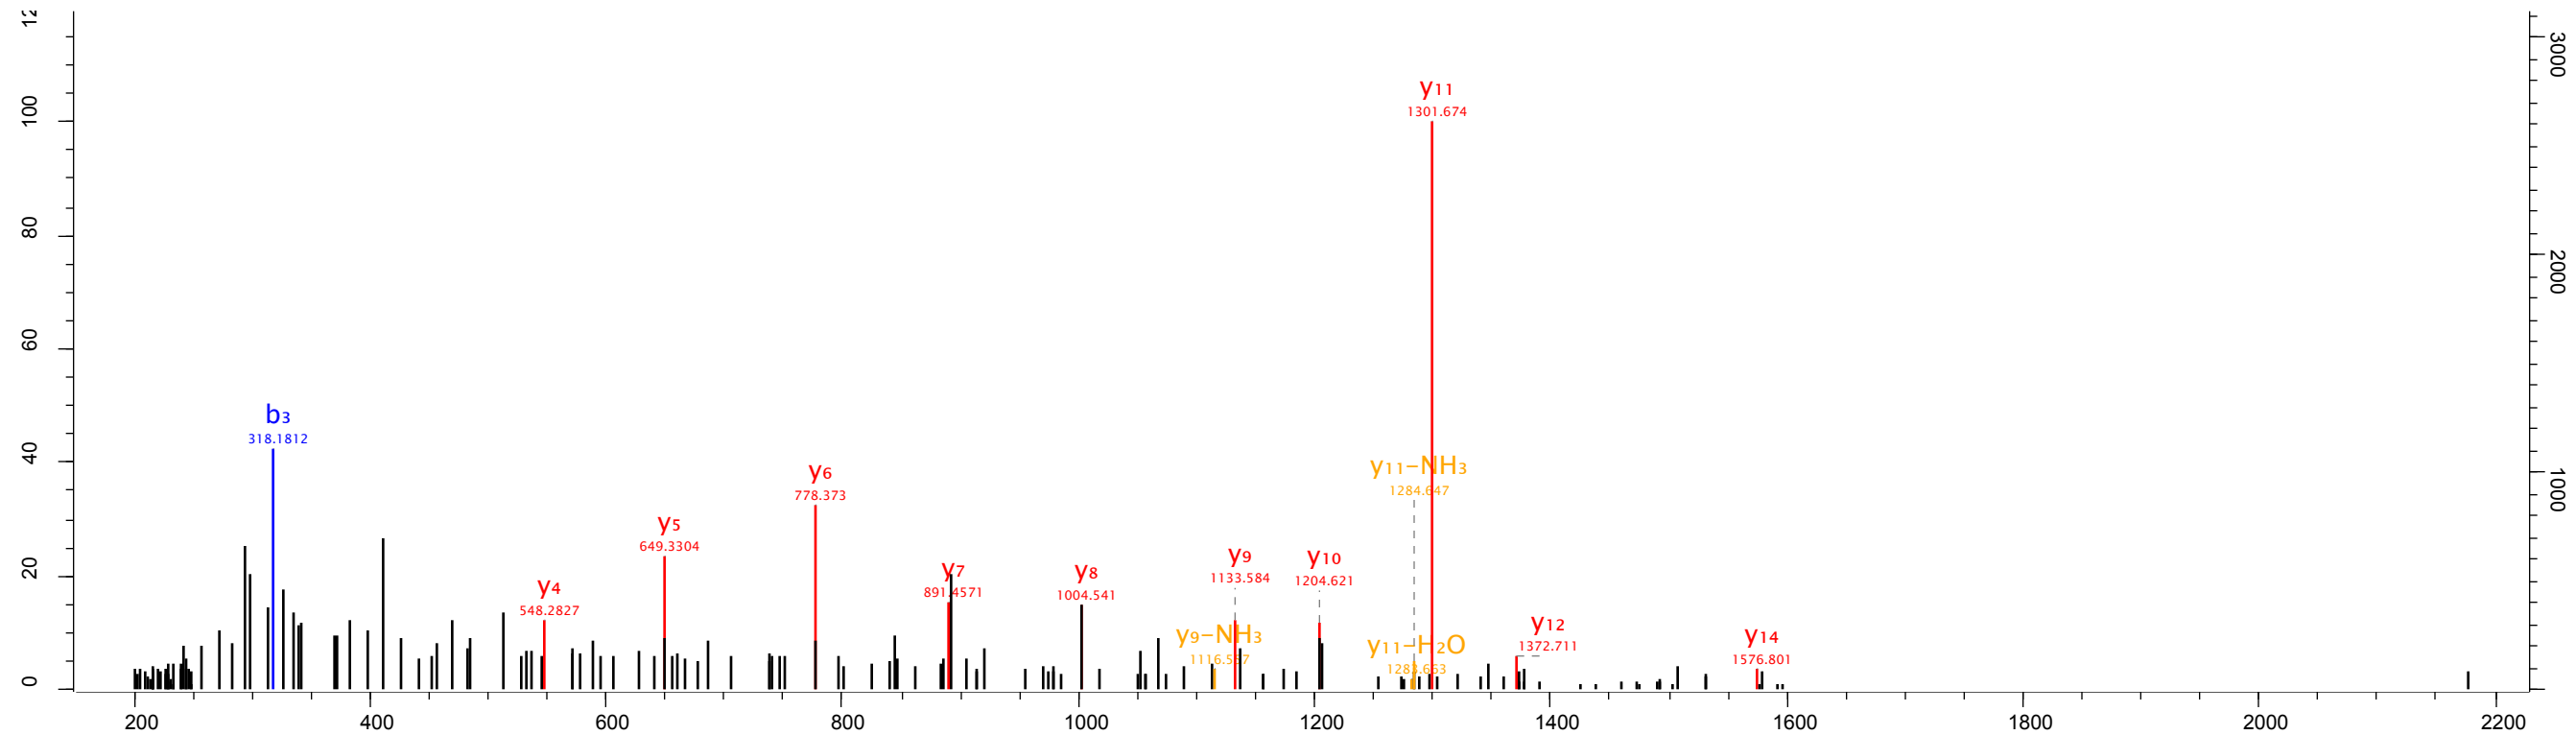



Raw file  
UPS1+500ngY\_90minTop17\_BC4\_01\_358

Scan 66172 Method TOF; CID Score 48.48 Mass 1977 Gene names CLP1

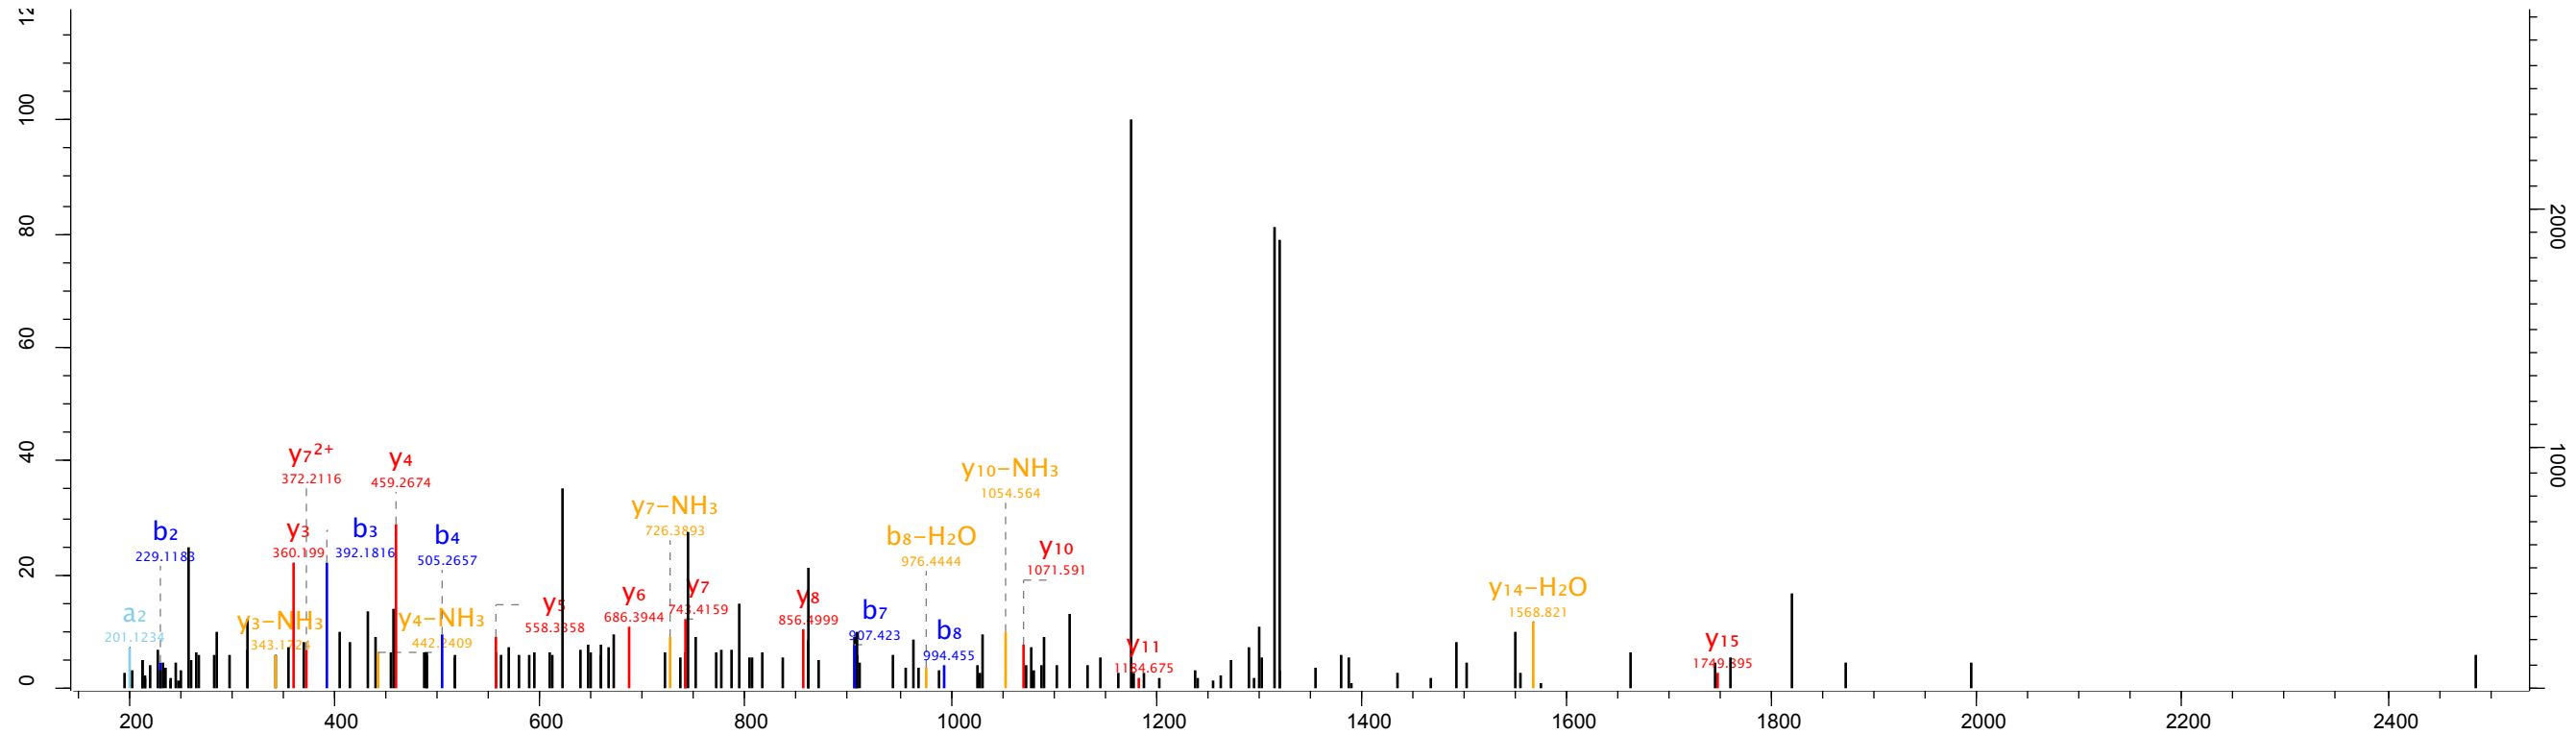

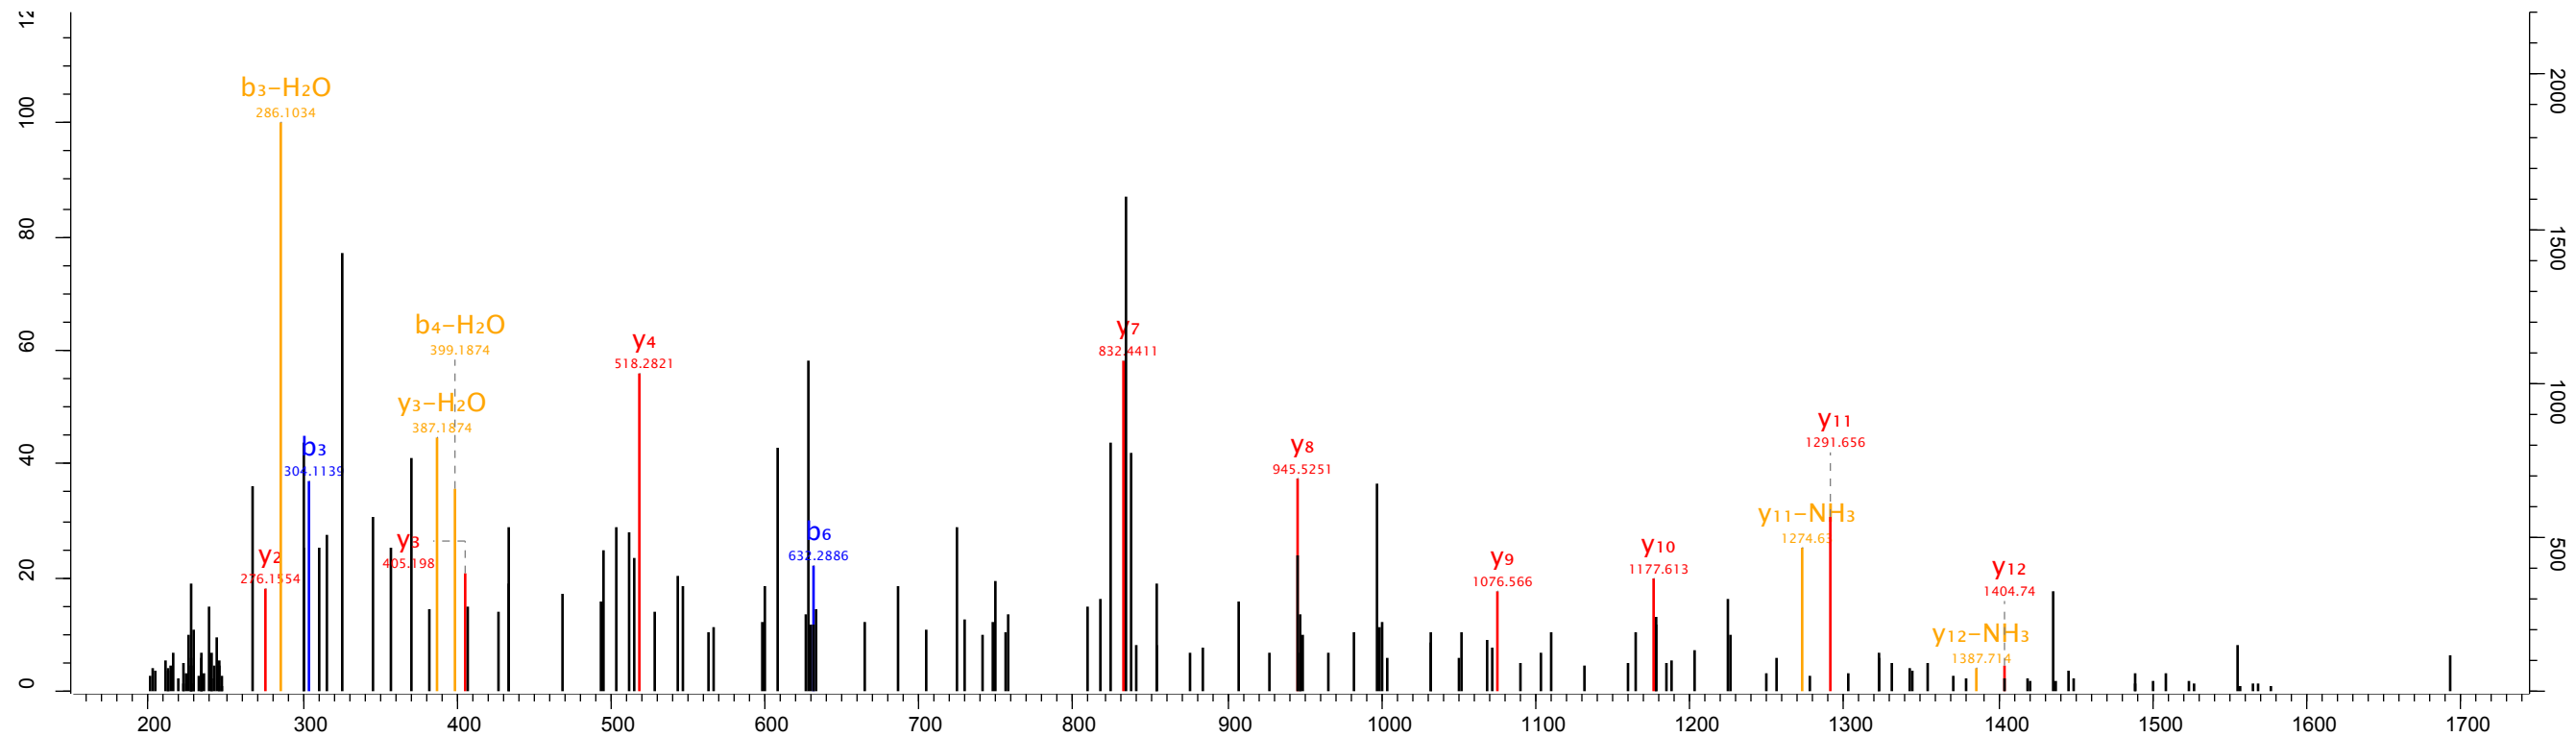

Raw file

UPS1+500ngY\_90minTop17\_BC4\_01\_358

66402

TOF; CID

Score  
42.71Mass  
2039.98Gene names  
MTQ2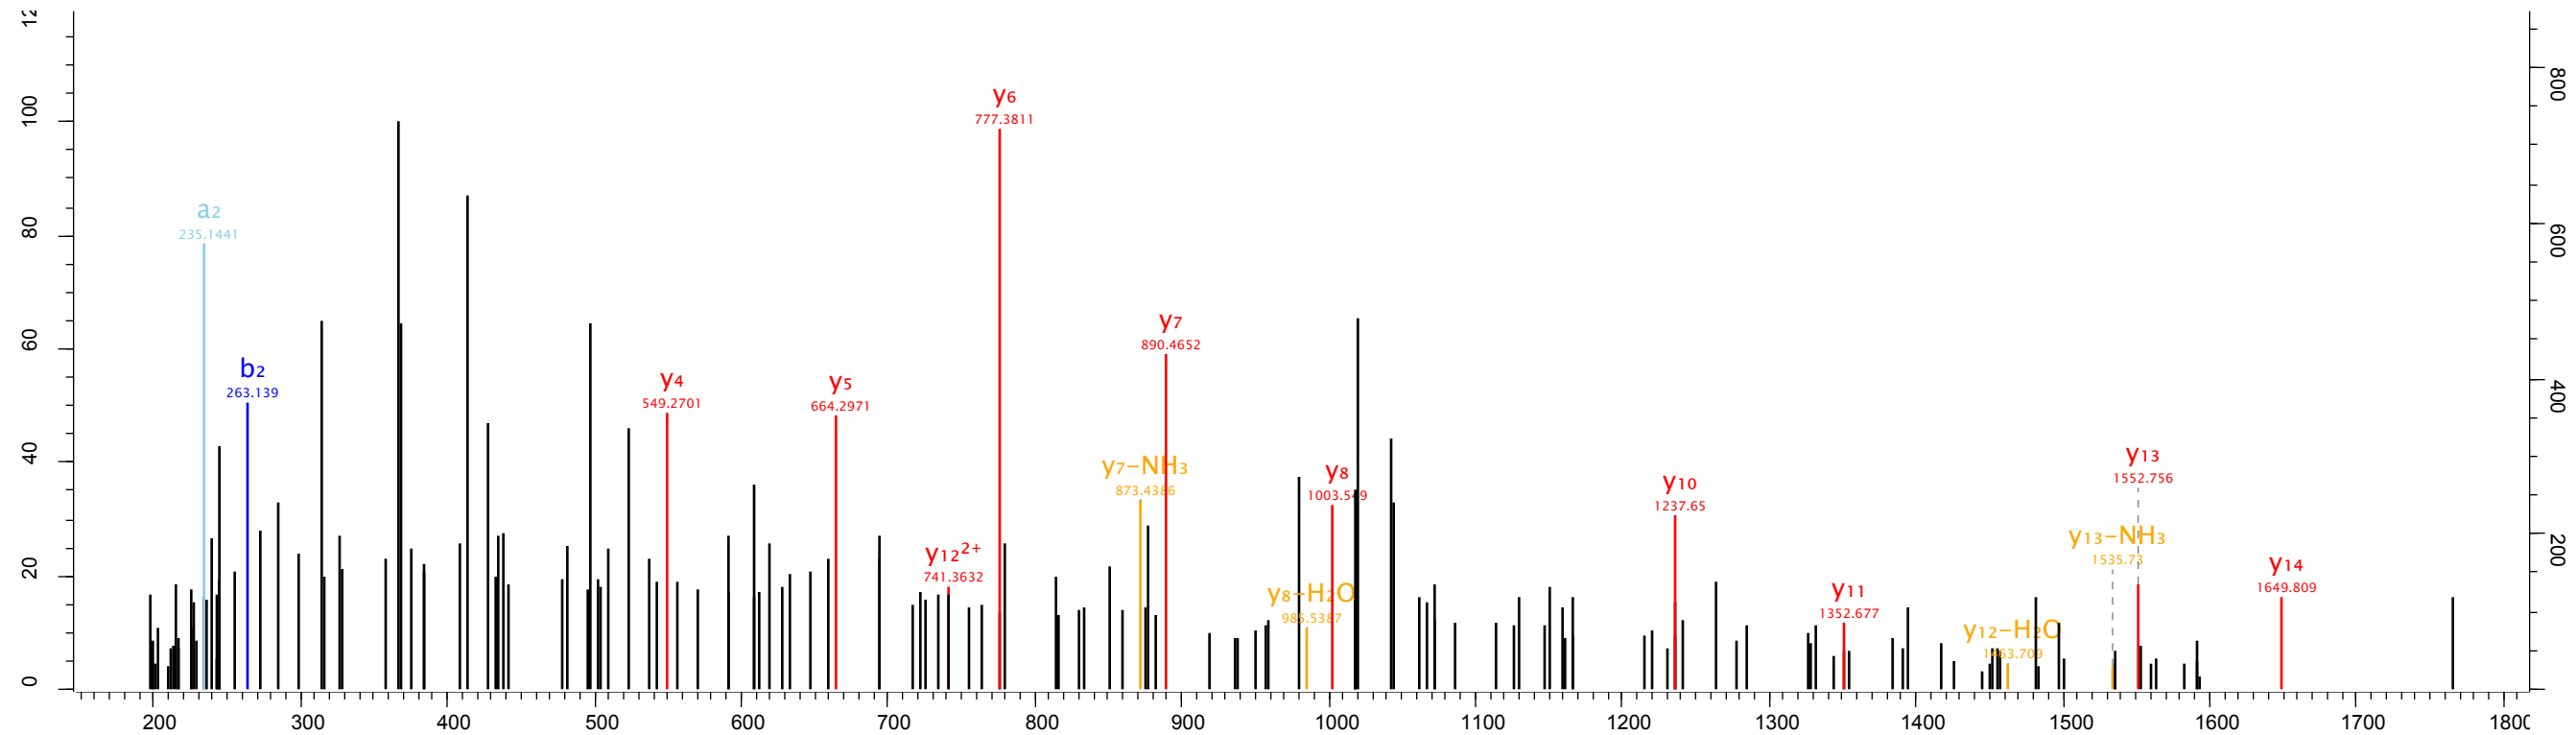

UPS1+500ngY\_90minTop17\_BC4\_01\_358

67029 TOF; CID 39.8 2881.47 TAH1

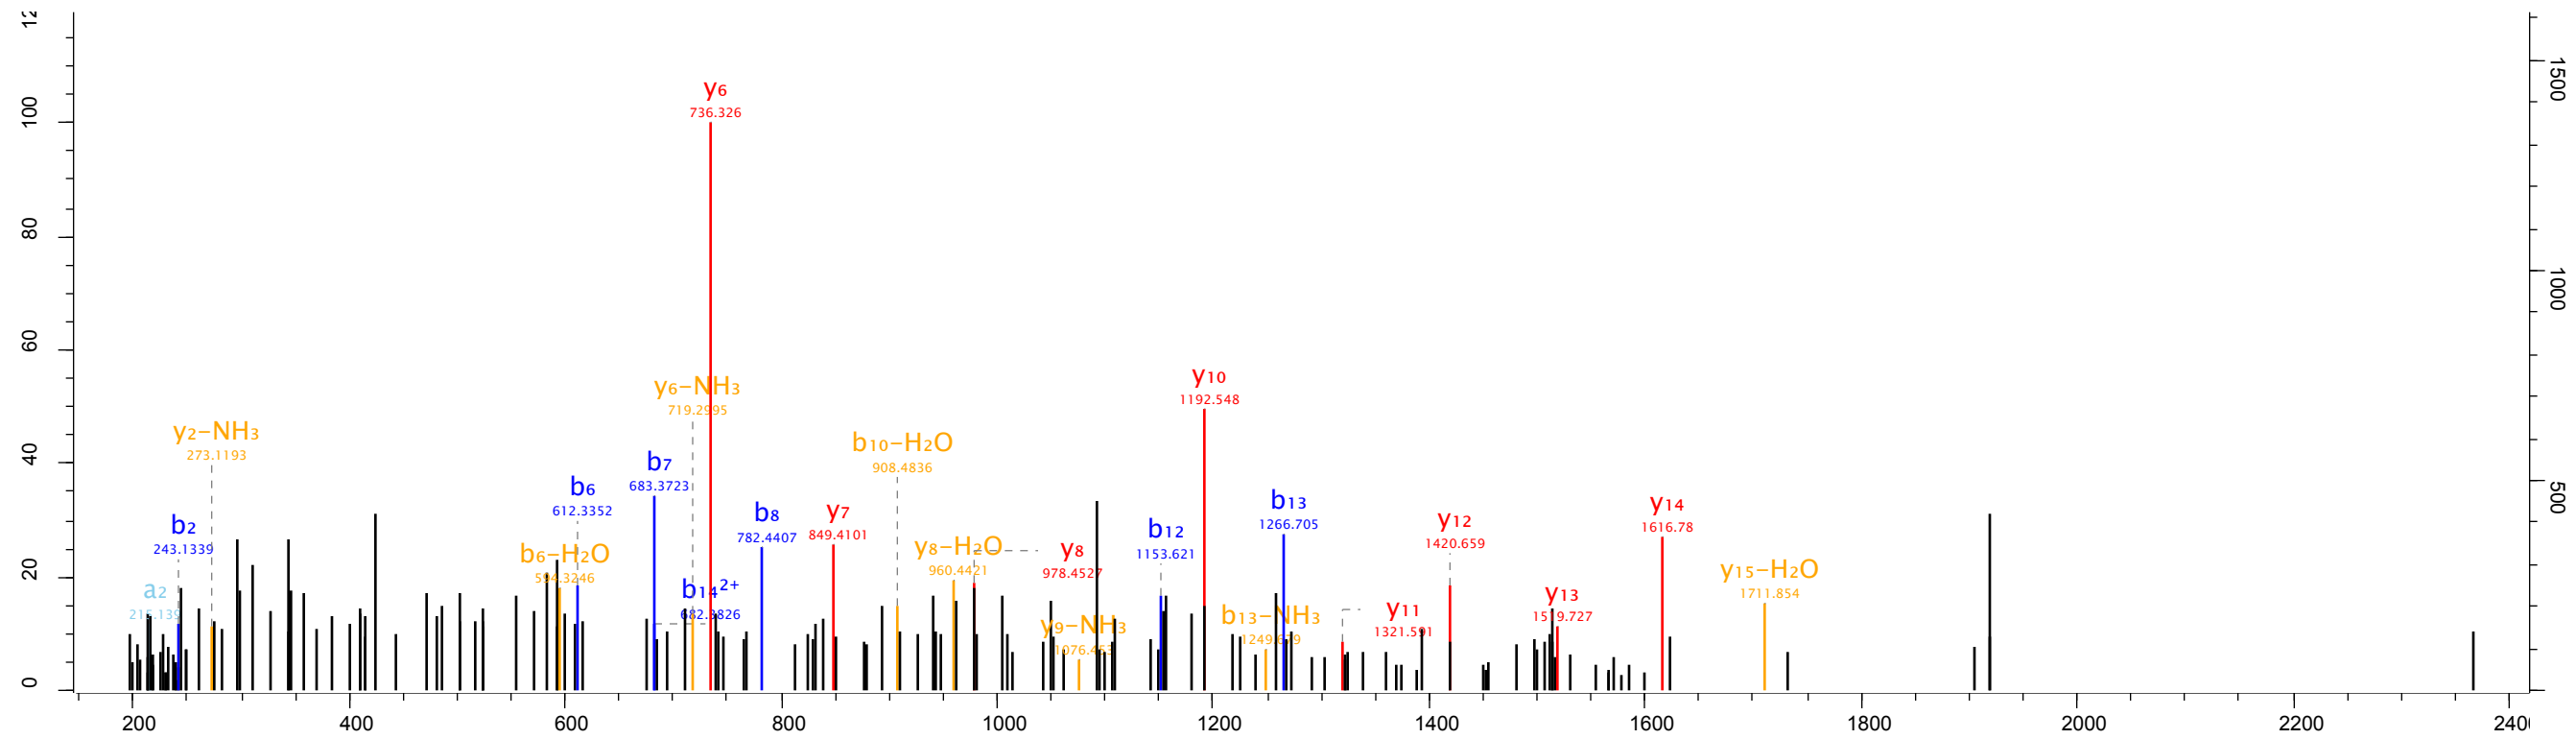

Raw file

UPS1+500ngY\_90minTop17\_BC4\_01\_358

Scan 67483 Method TOF; CID Score 62.2 Mass 1823.92 Gene names NOP14

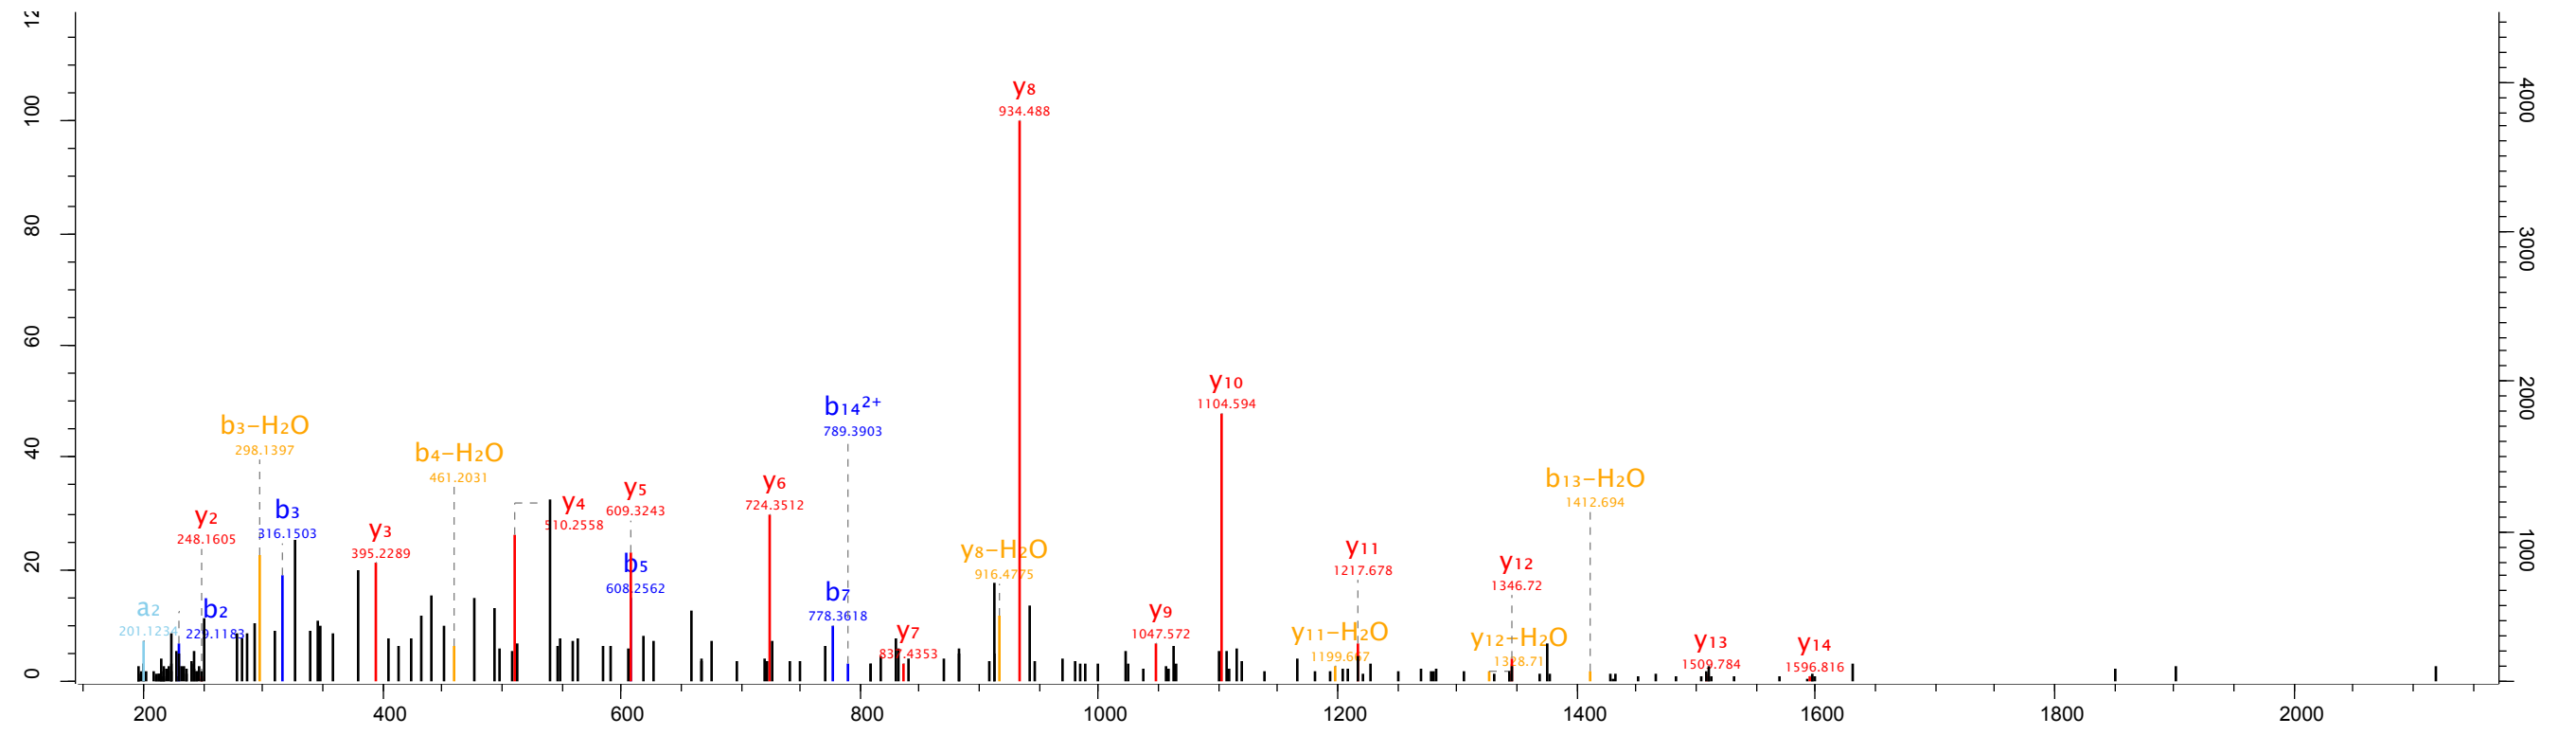

UPS1+500ngY\_90minTop17\_BC4\_01\_358

67587 TOF; CID 51.5 1817.88 HTL1

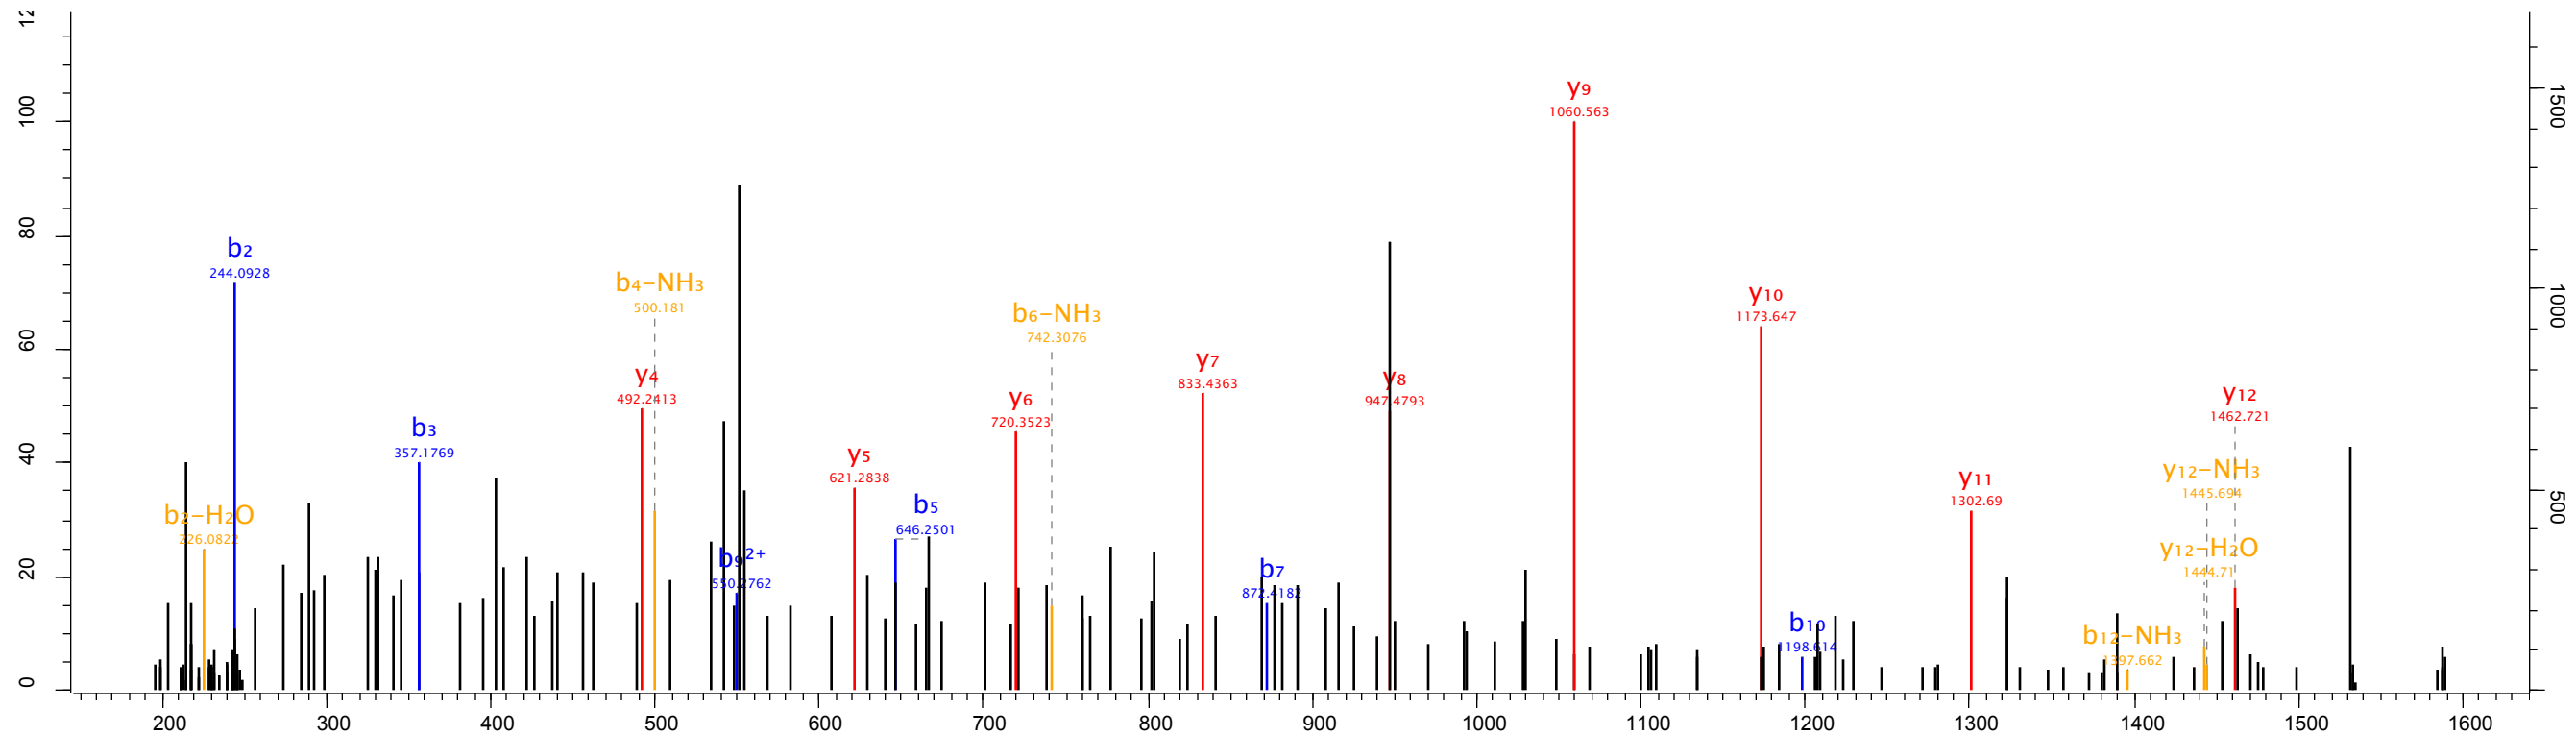

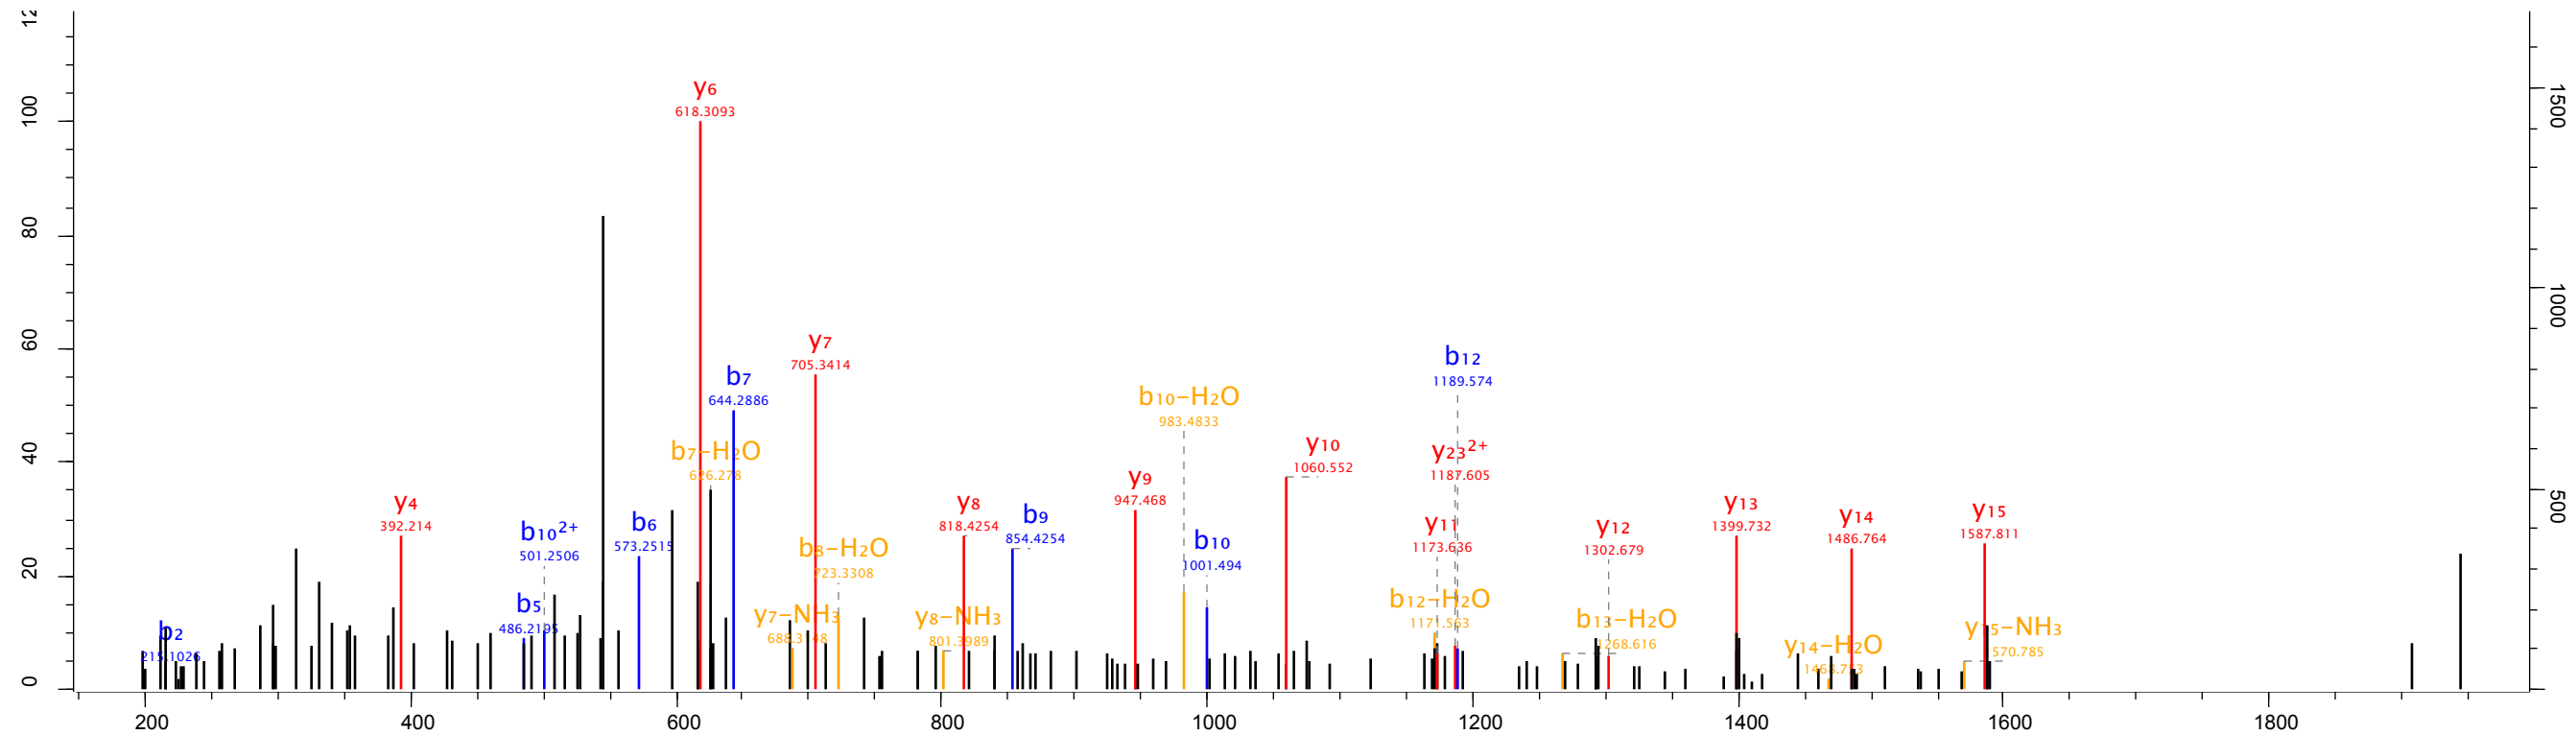

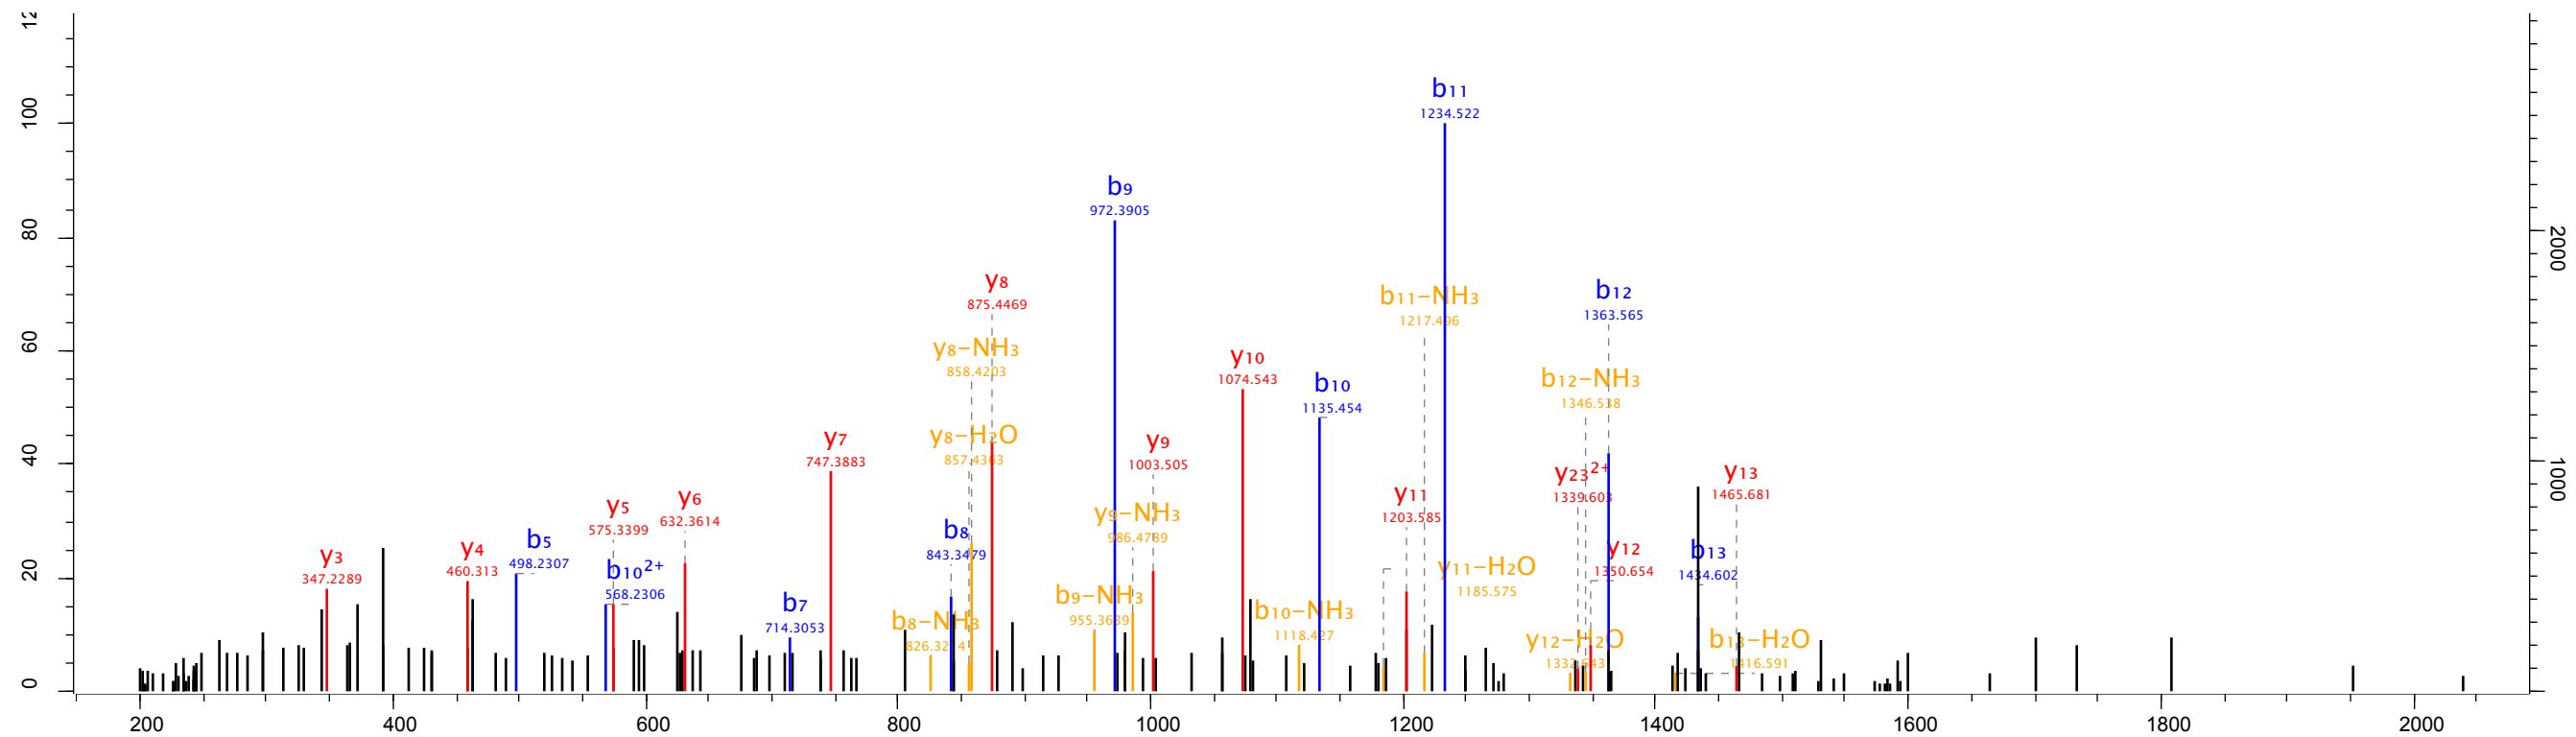



Raw file  
UPS1+500ngY\_90minTop17\_BC4\_01\_358

Scan 68271 Method TOF; CID Score 52.86 Mass 1798.87 Gene names TRM732

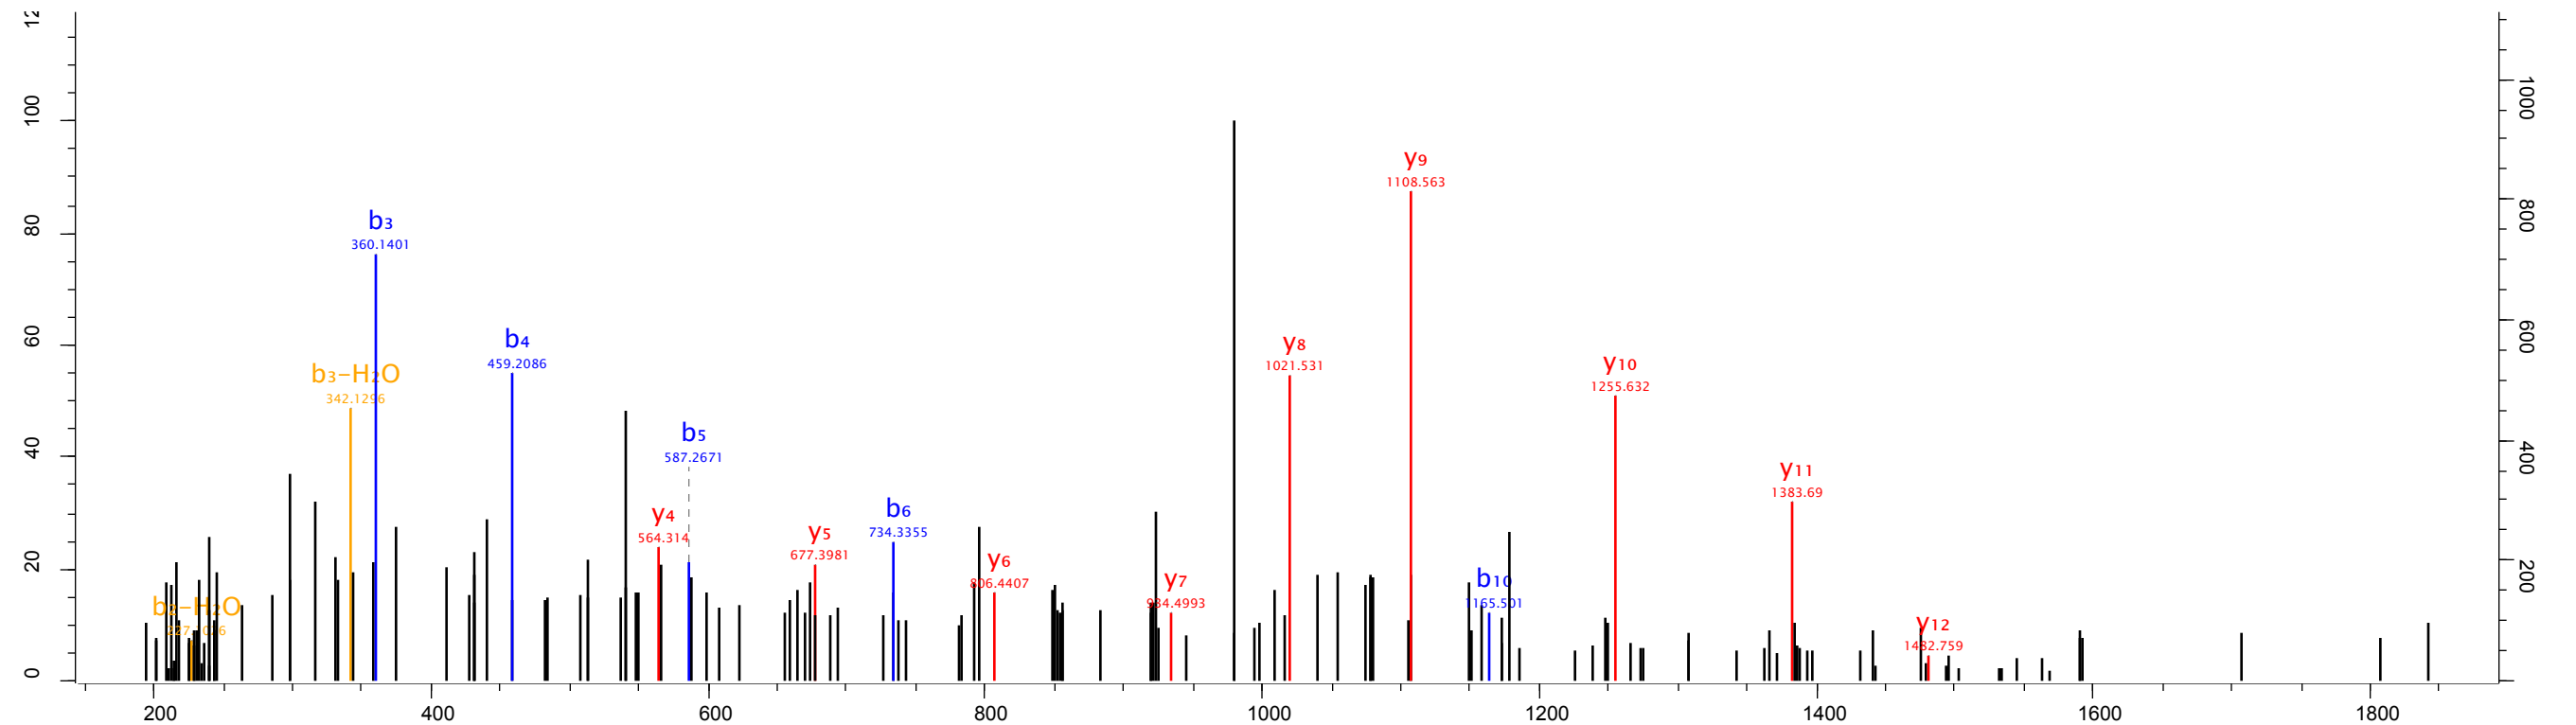

Raw file  
UPS1+500ngY\_90minTop17\_BC4\_01\_358

Scan 68534 Method TOF; CID Score 46.66 Mass 2582.38 Gene names APE4

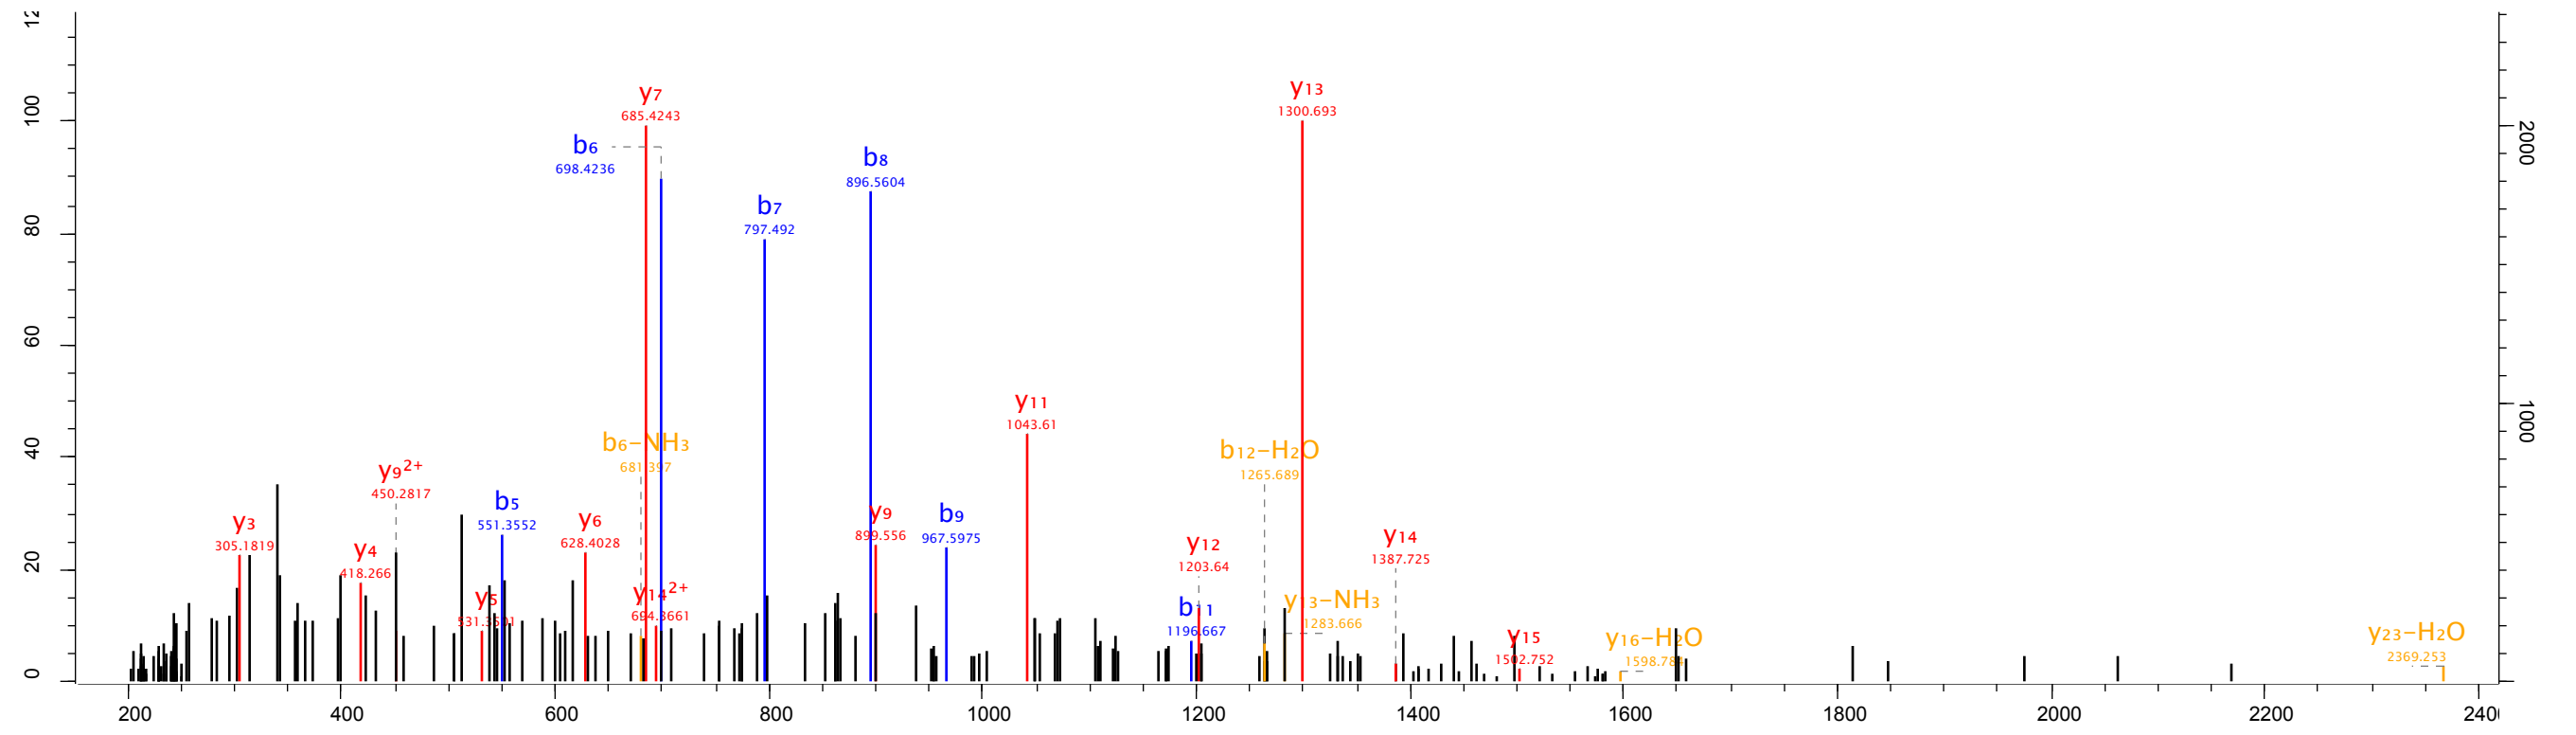

Raw file

UPS1+500ngY\_90minTop17\_BC4\_01\_358

| Scan  | Method   | Score | Mass    | Gene names |
|-------|----------|-------|---------|------------|
| 68541 | TOF; CID | 47.04 | 1586.85 | MSH6       |

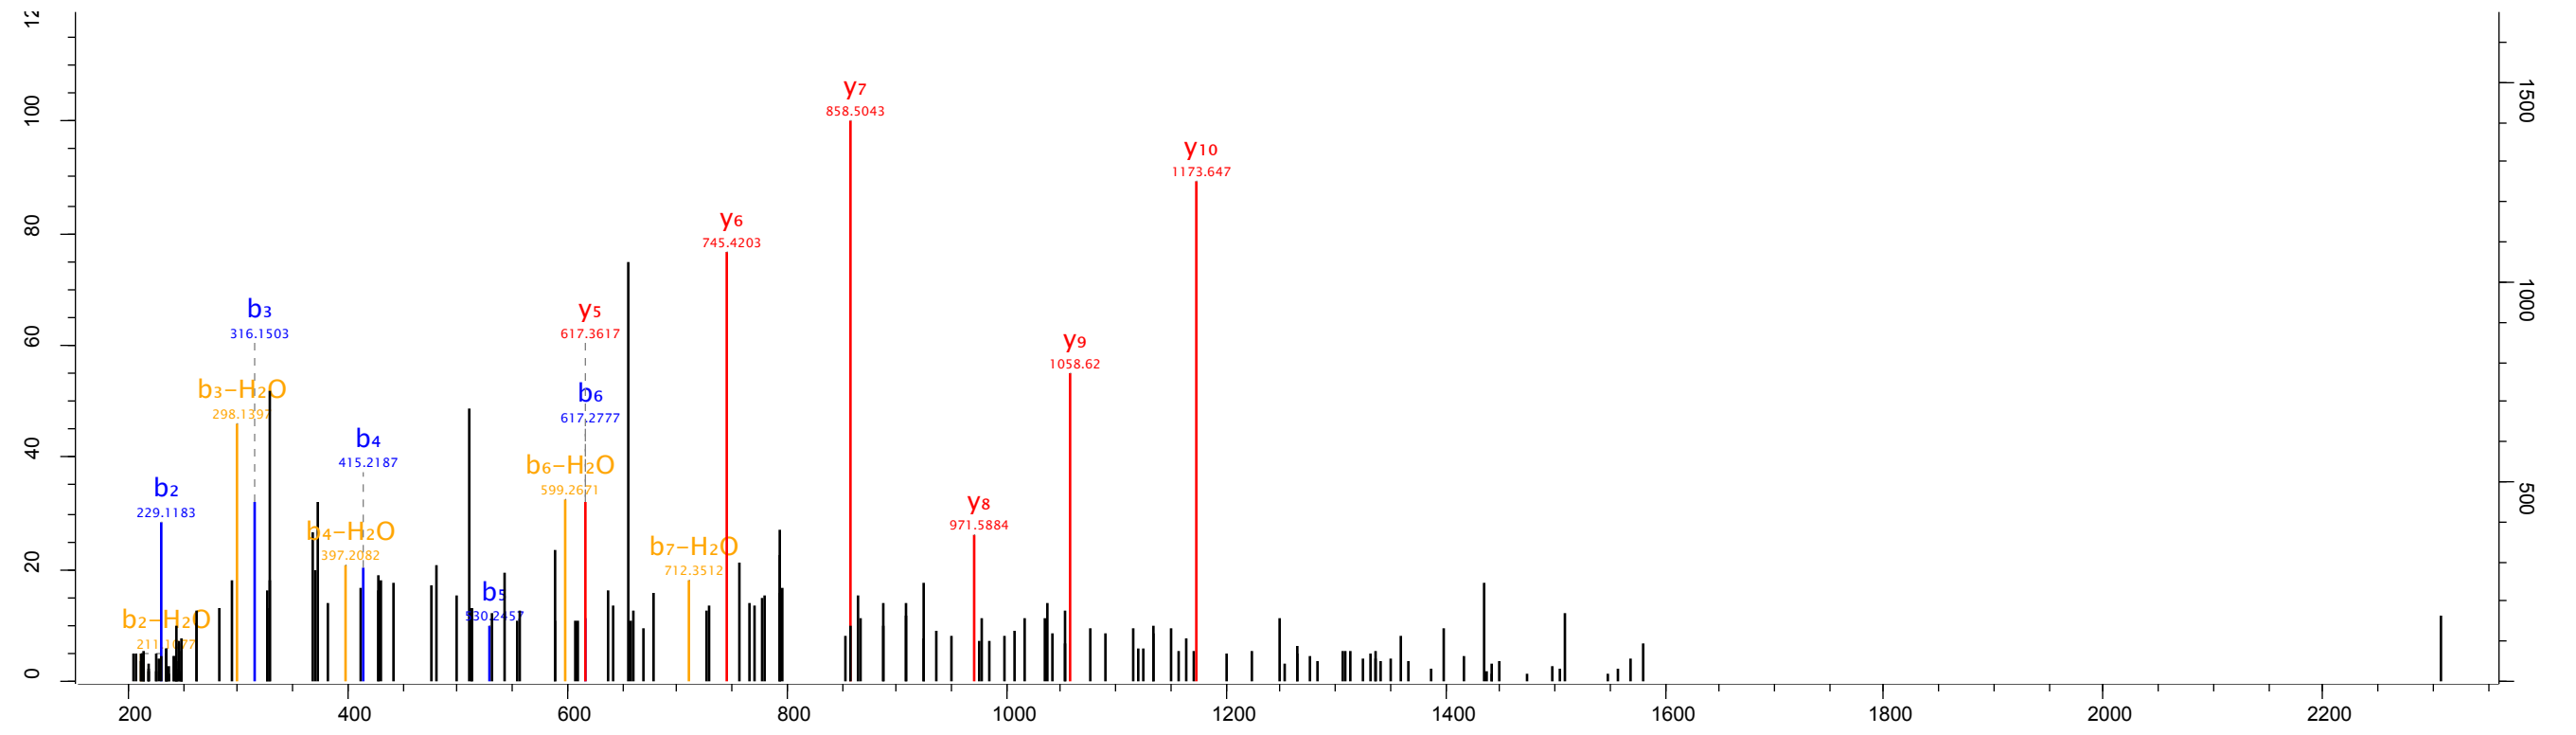

Raw file  
UPS1+500ngY\_90minTop17\_BC4\_01\_358

Scan 68662 Method TOF; CID Score 36.3 Mass 3302.48 Gene names HMT1

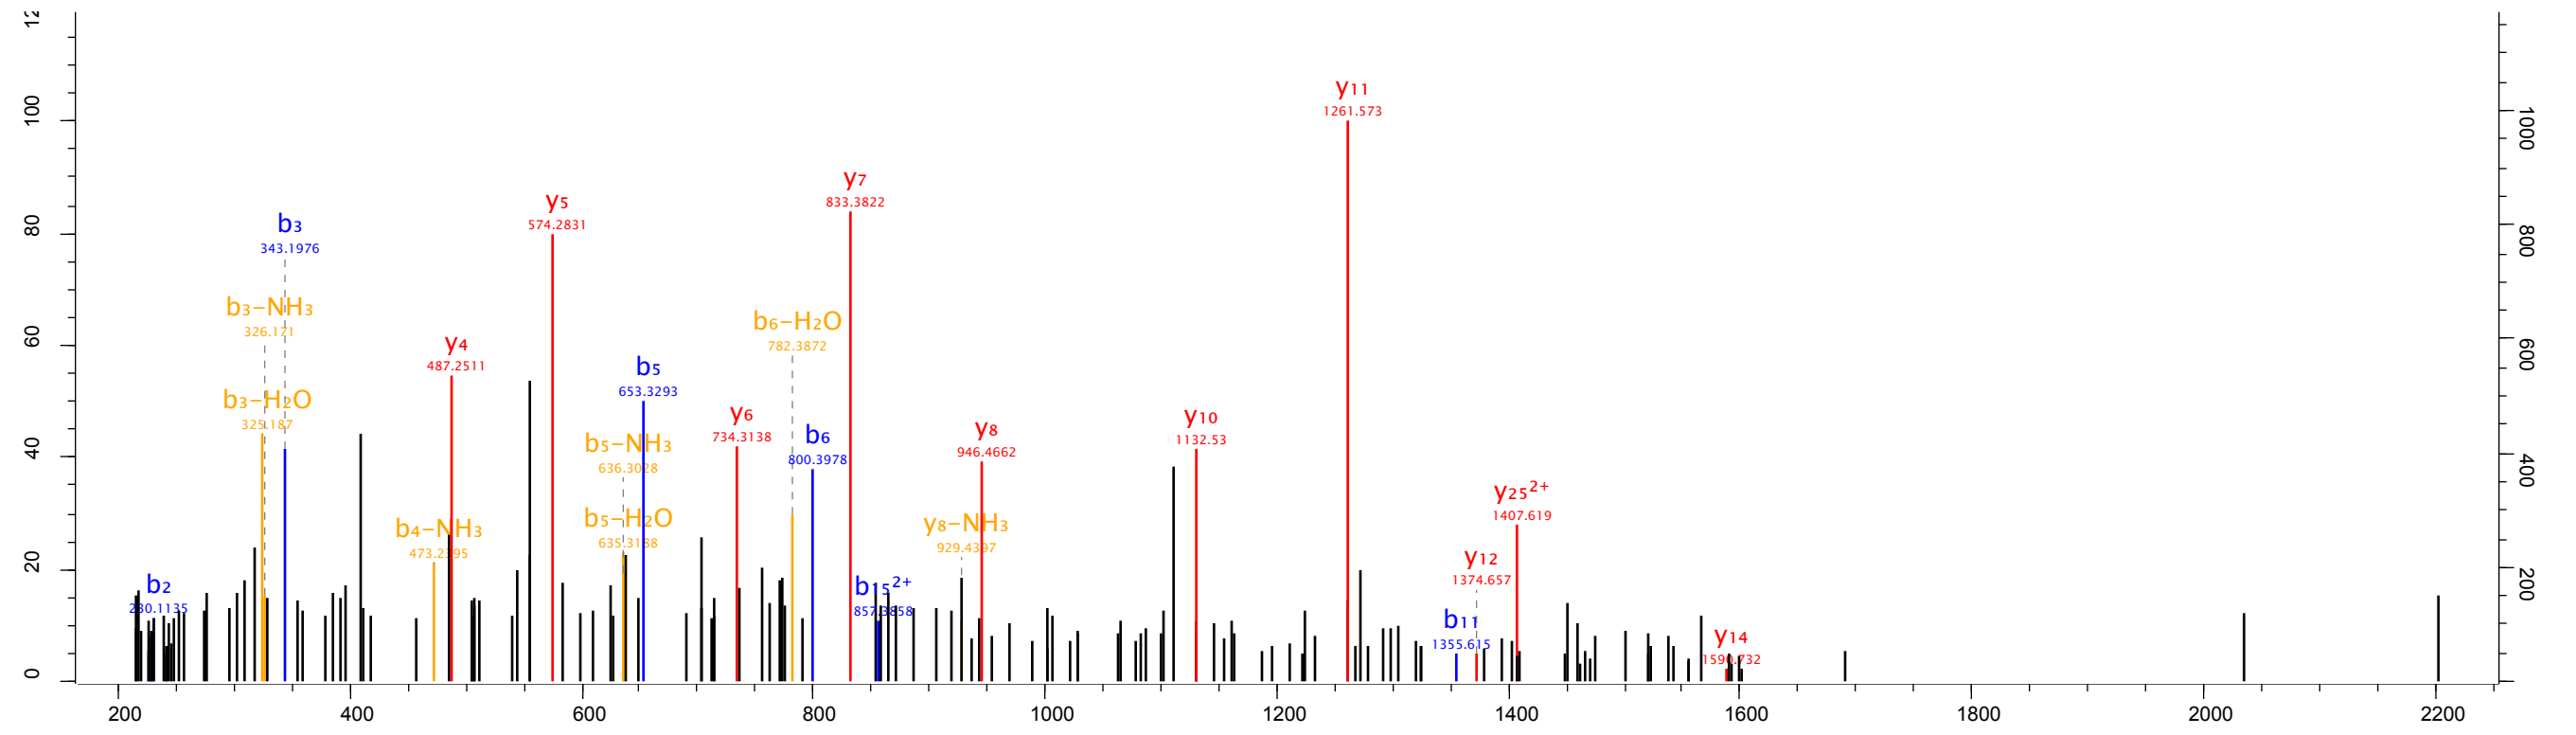

Raw file

UPS1+500ngY\_90minTop17\_BC4\_01\_358

| Scan  | Method   | Score | Mass    | Gene names |
|-------|----------|-------|---------|------------|
| 69317 | TOF; CID | 43.38 | 2469.21 | MNS1       |

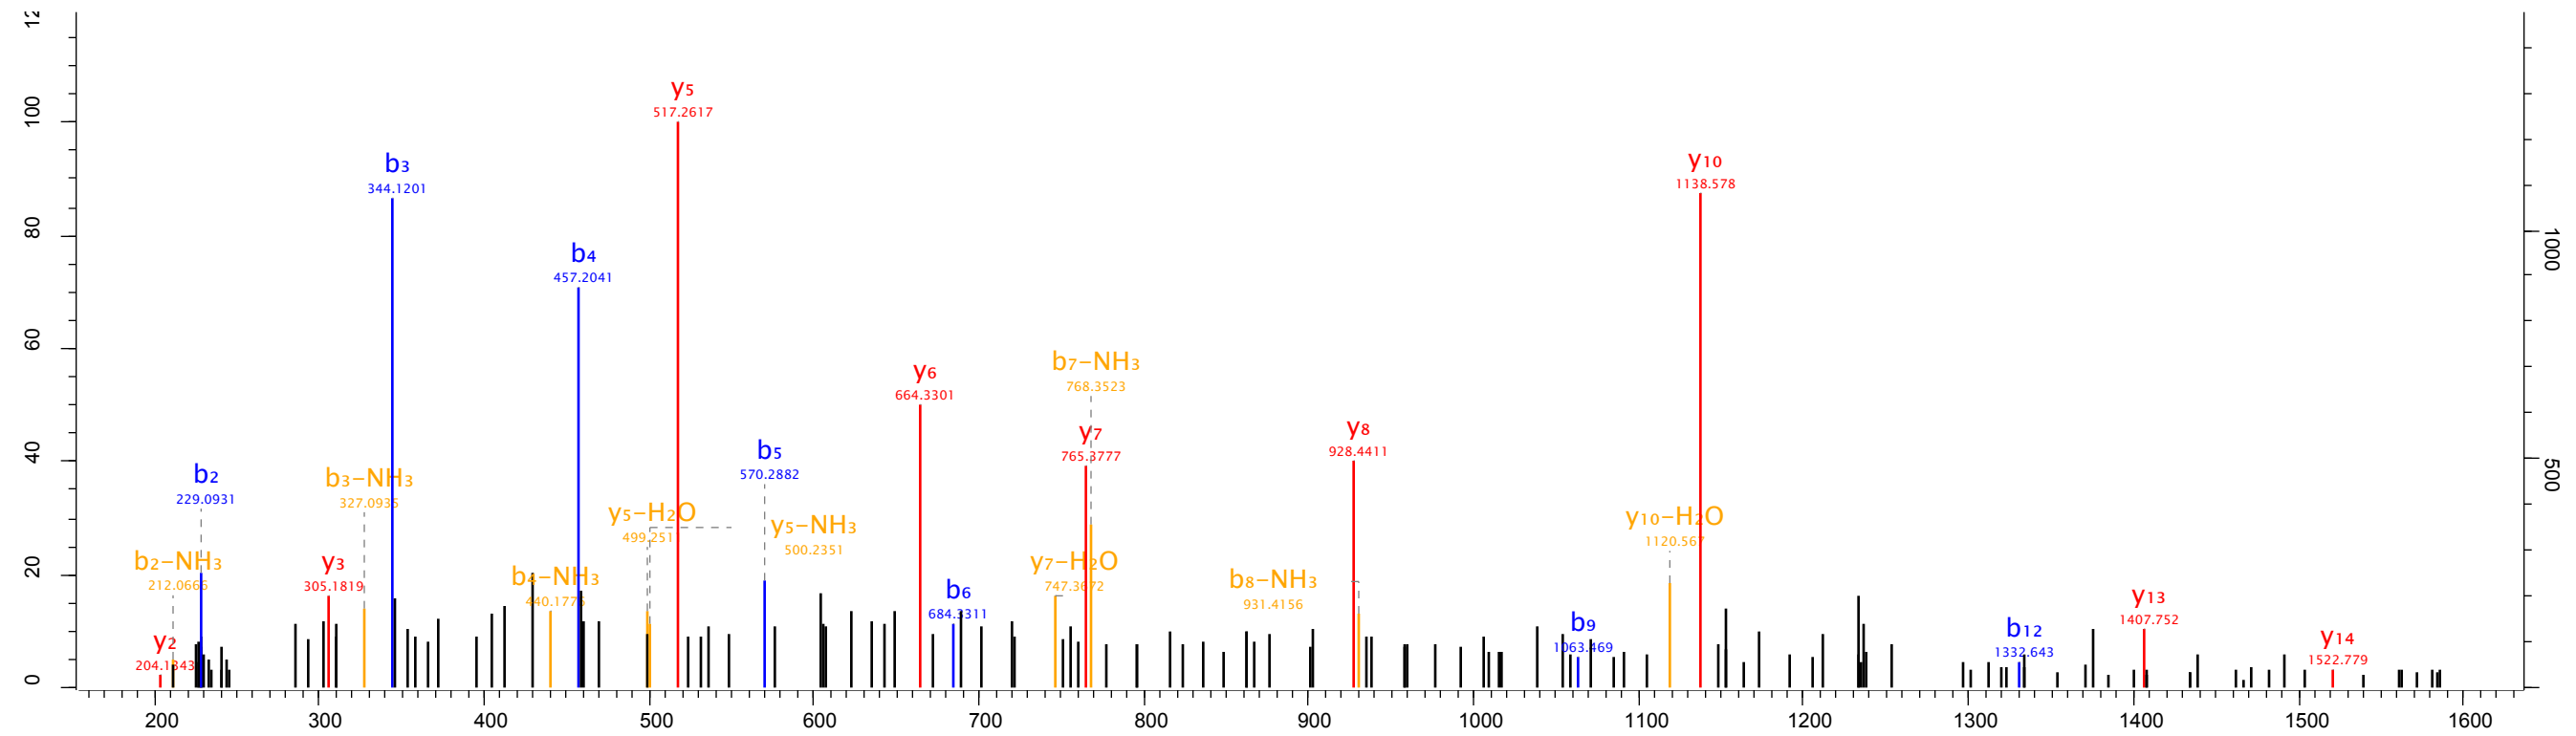

Raw file  
UPS1+500ngY\_90minTop17\_BC4\_01\_358

| Scan  | Method   | Score | Mass    | Gene names |
|-------|----------|-------|---------|------------|
| 69353 | TOF; CID | 42.06 | 2915.54 | ATP16      |

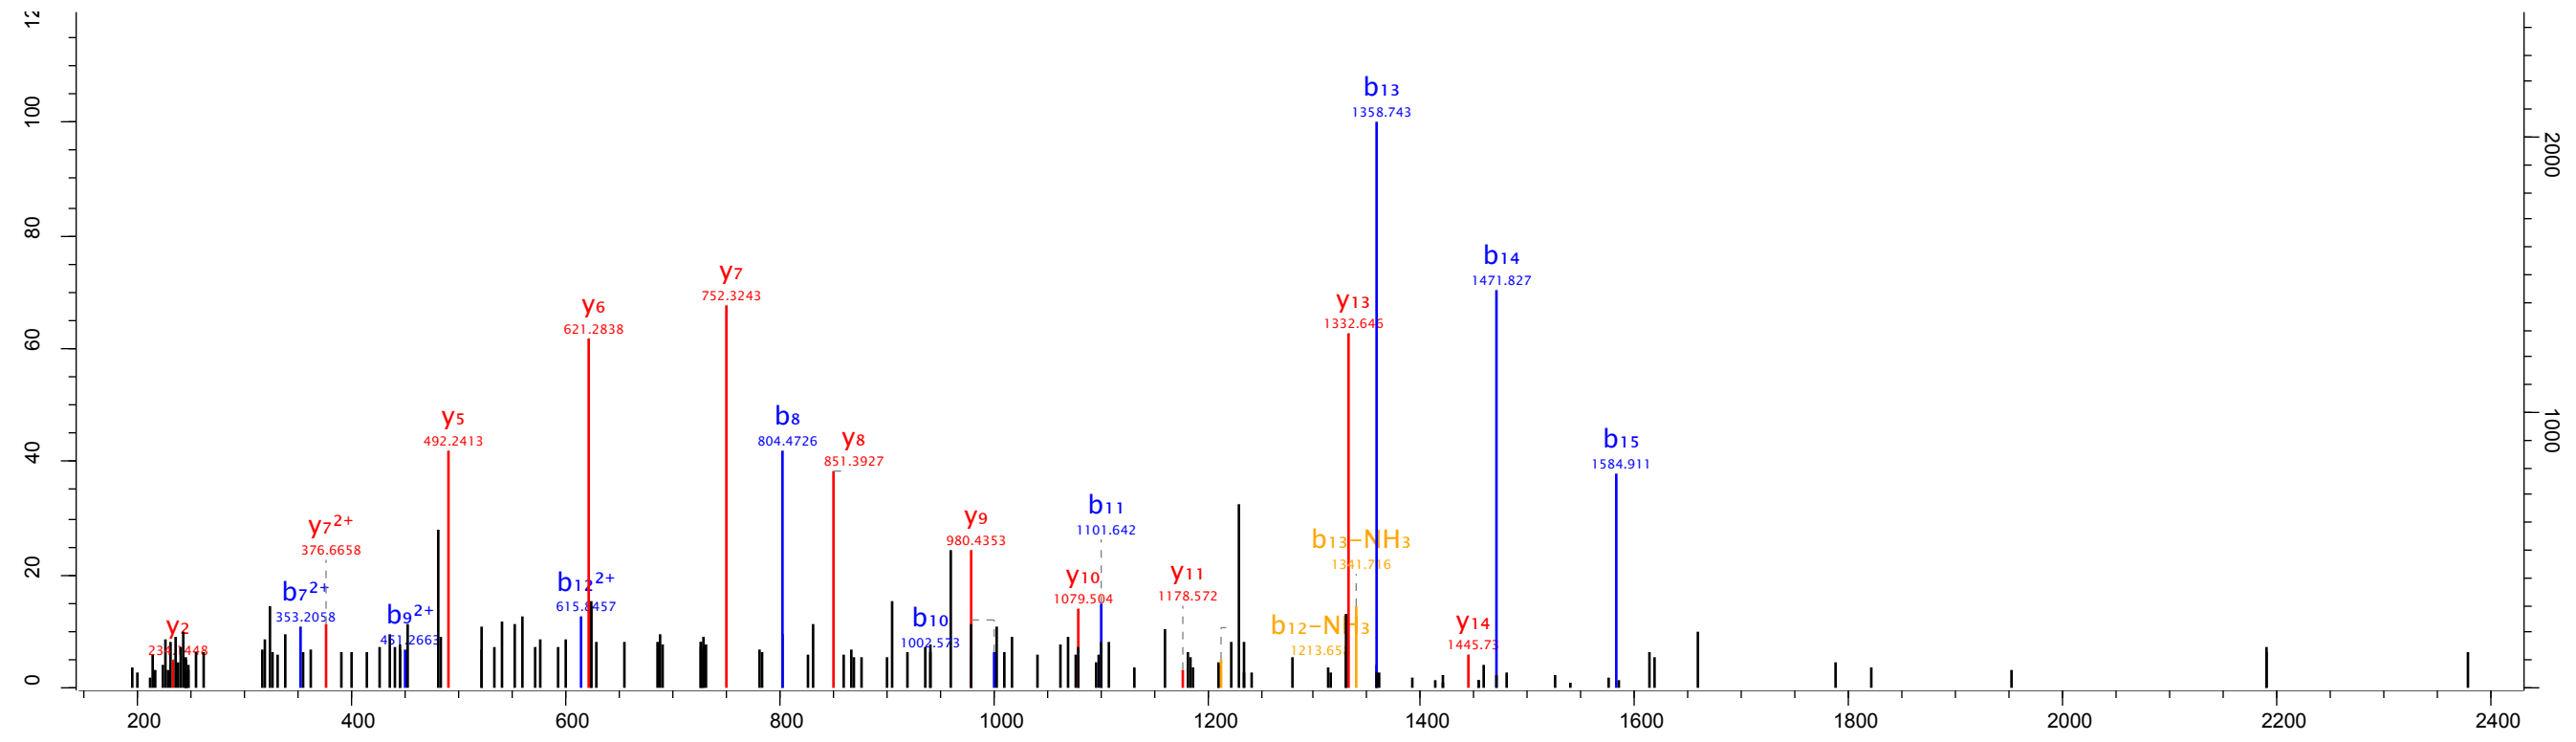

Raw file  
UPS1+500ngY\_90minTop17\_BC4\_01\_358

Scan: 69714  
Method: TOF; CID  
Score: 66.99  
Mass: 1417.74  
Gene names: FDC1

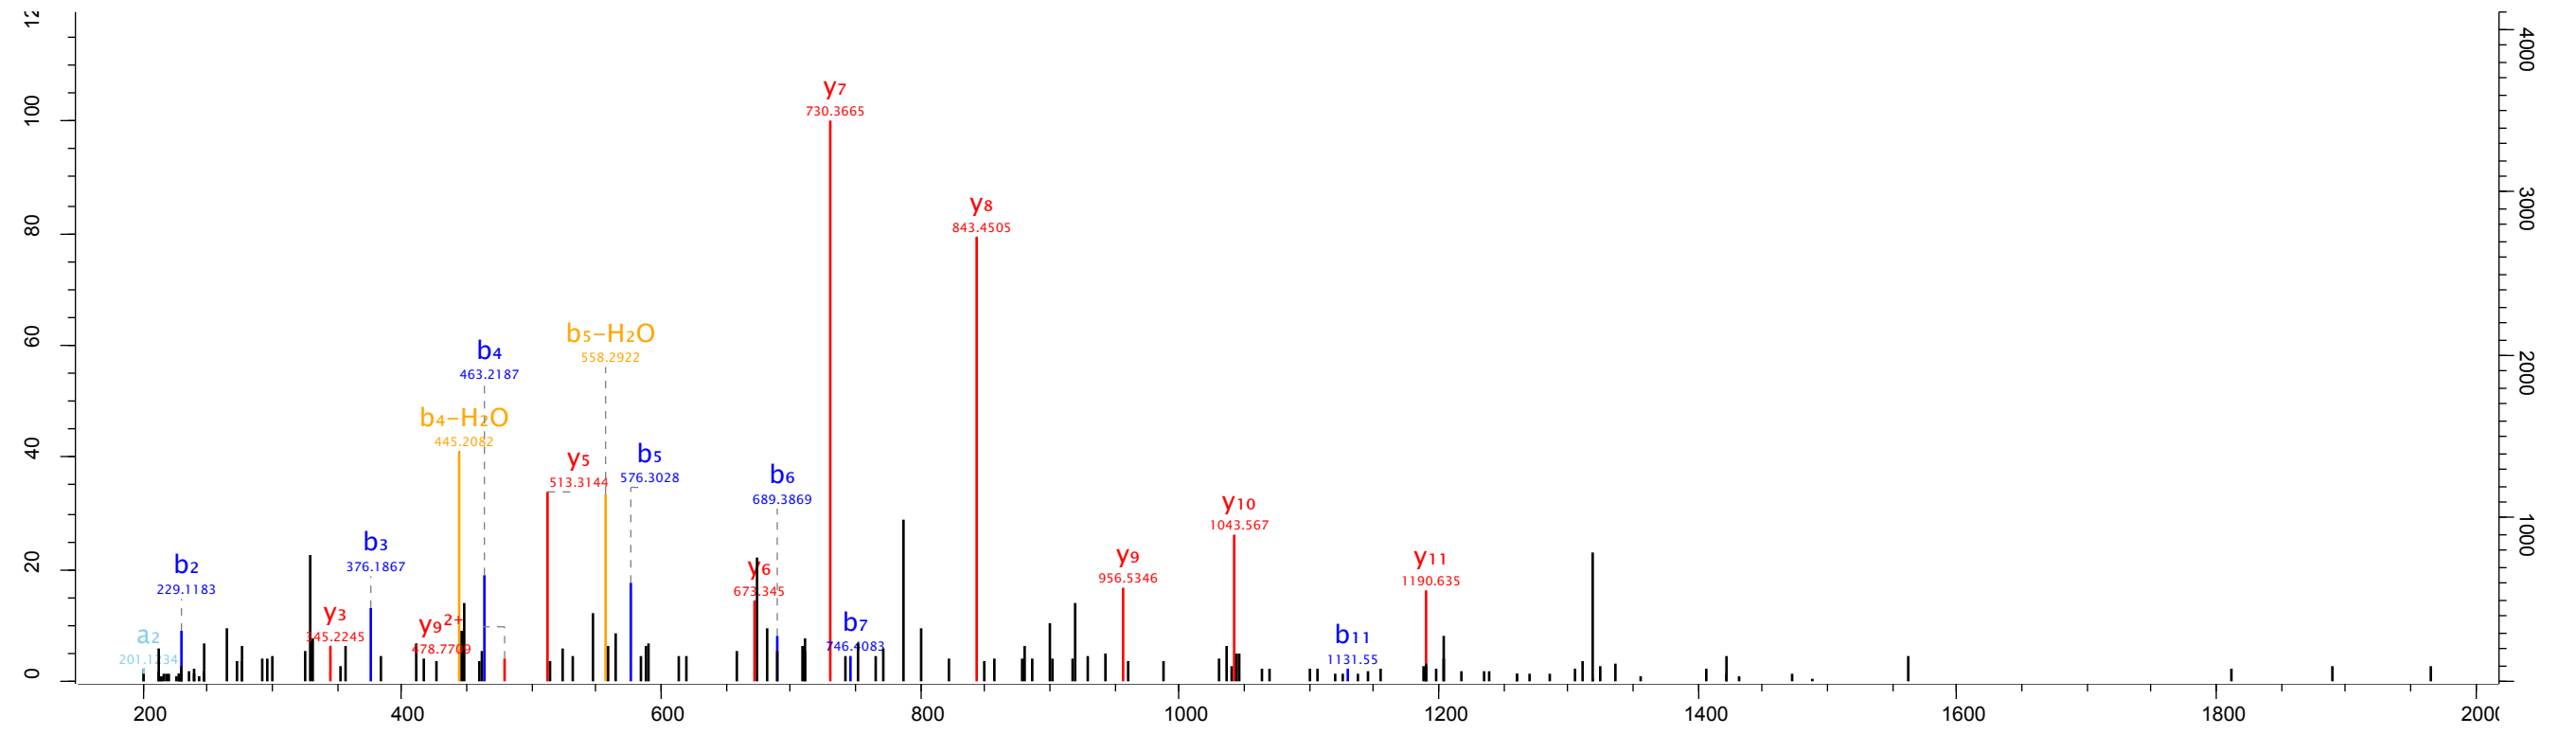

Raw file  
UPS1+500ngY\_90minTop17\_BC4\_01\_358

Scan 69814 Method TOF; CID Score 47.04 Mass 1594.8 Gene names POM152

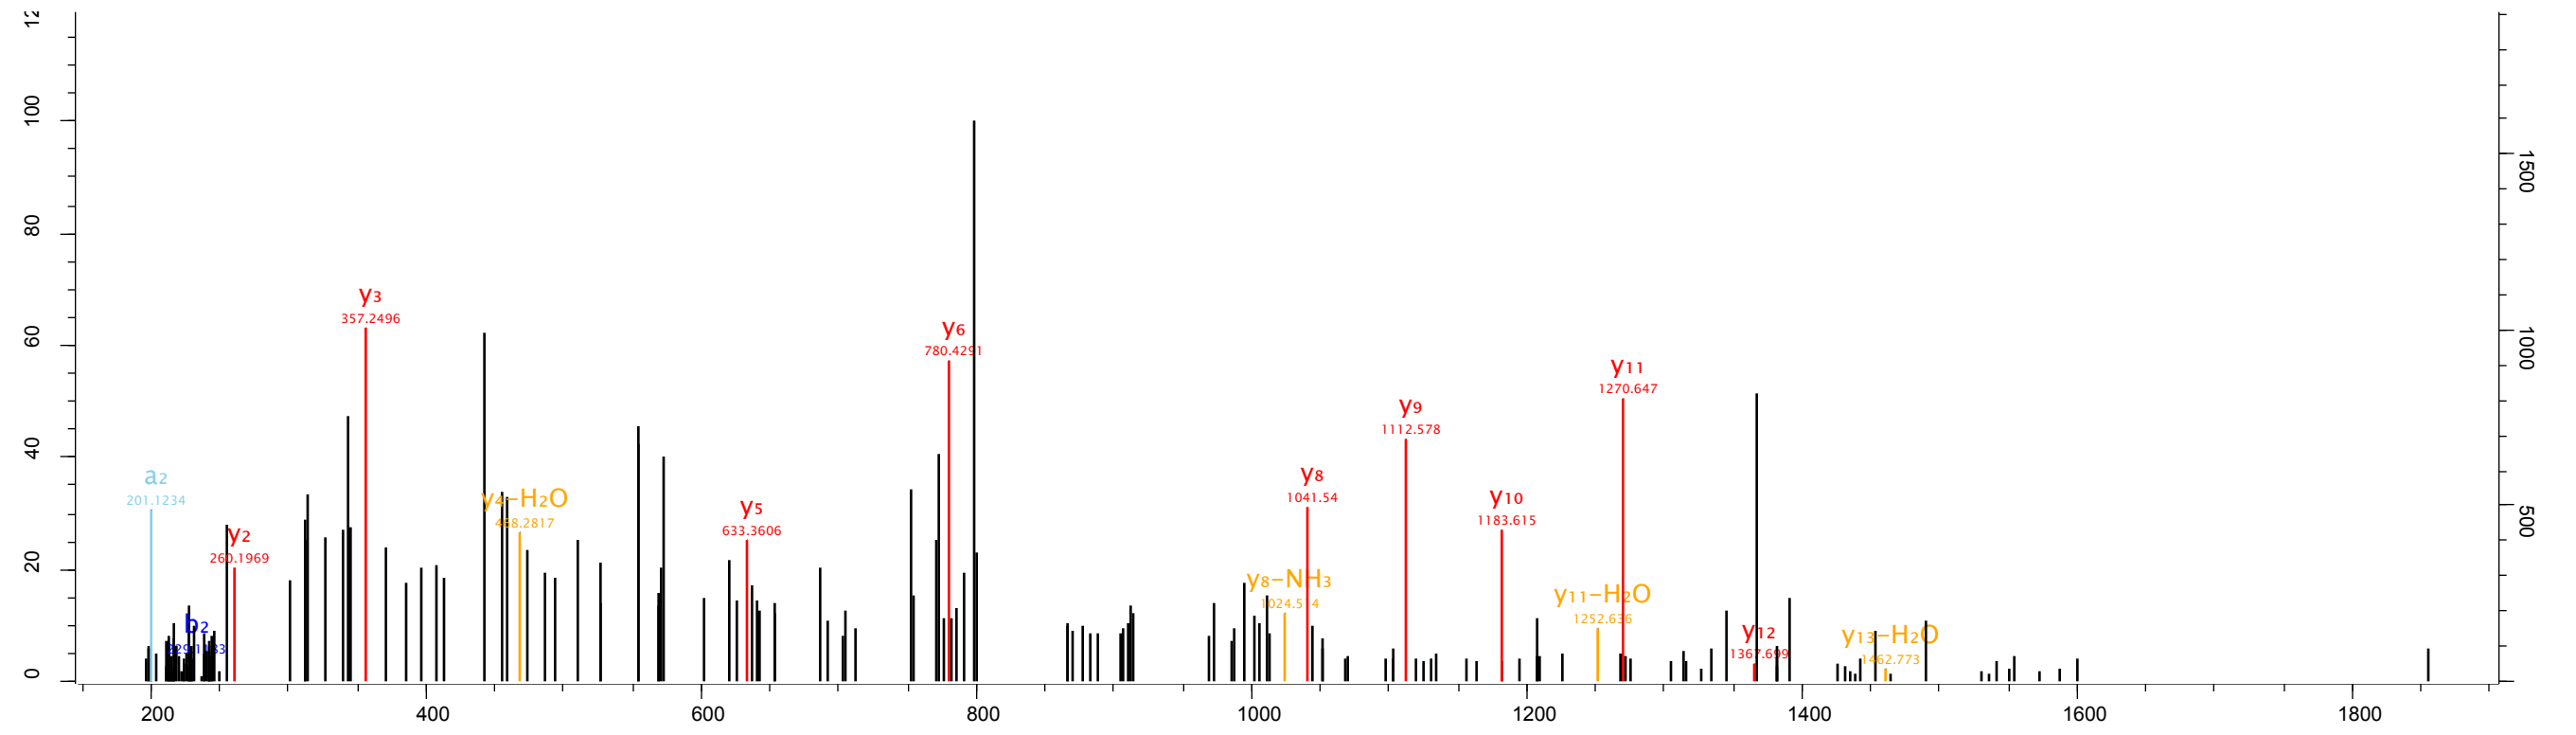



Raw file

UPS1+500ngY\_90minTop17\_BC4\_01\_358

Scan 70805 Method TOF; CID Score 46.89 Mass 1803.9 Gene names RSC9

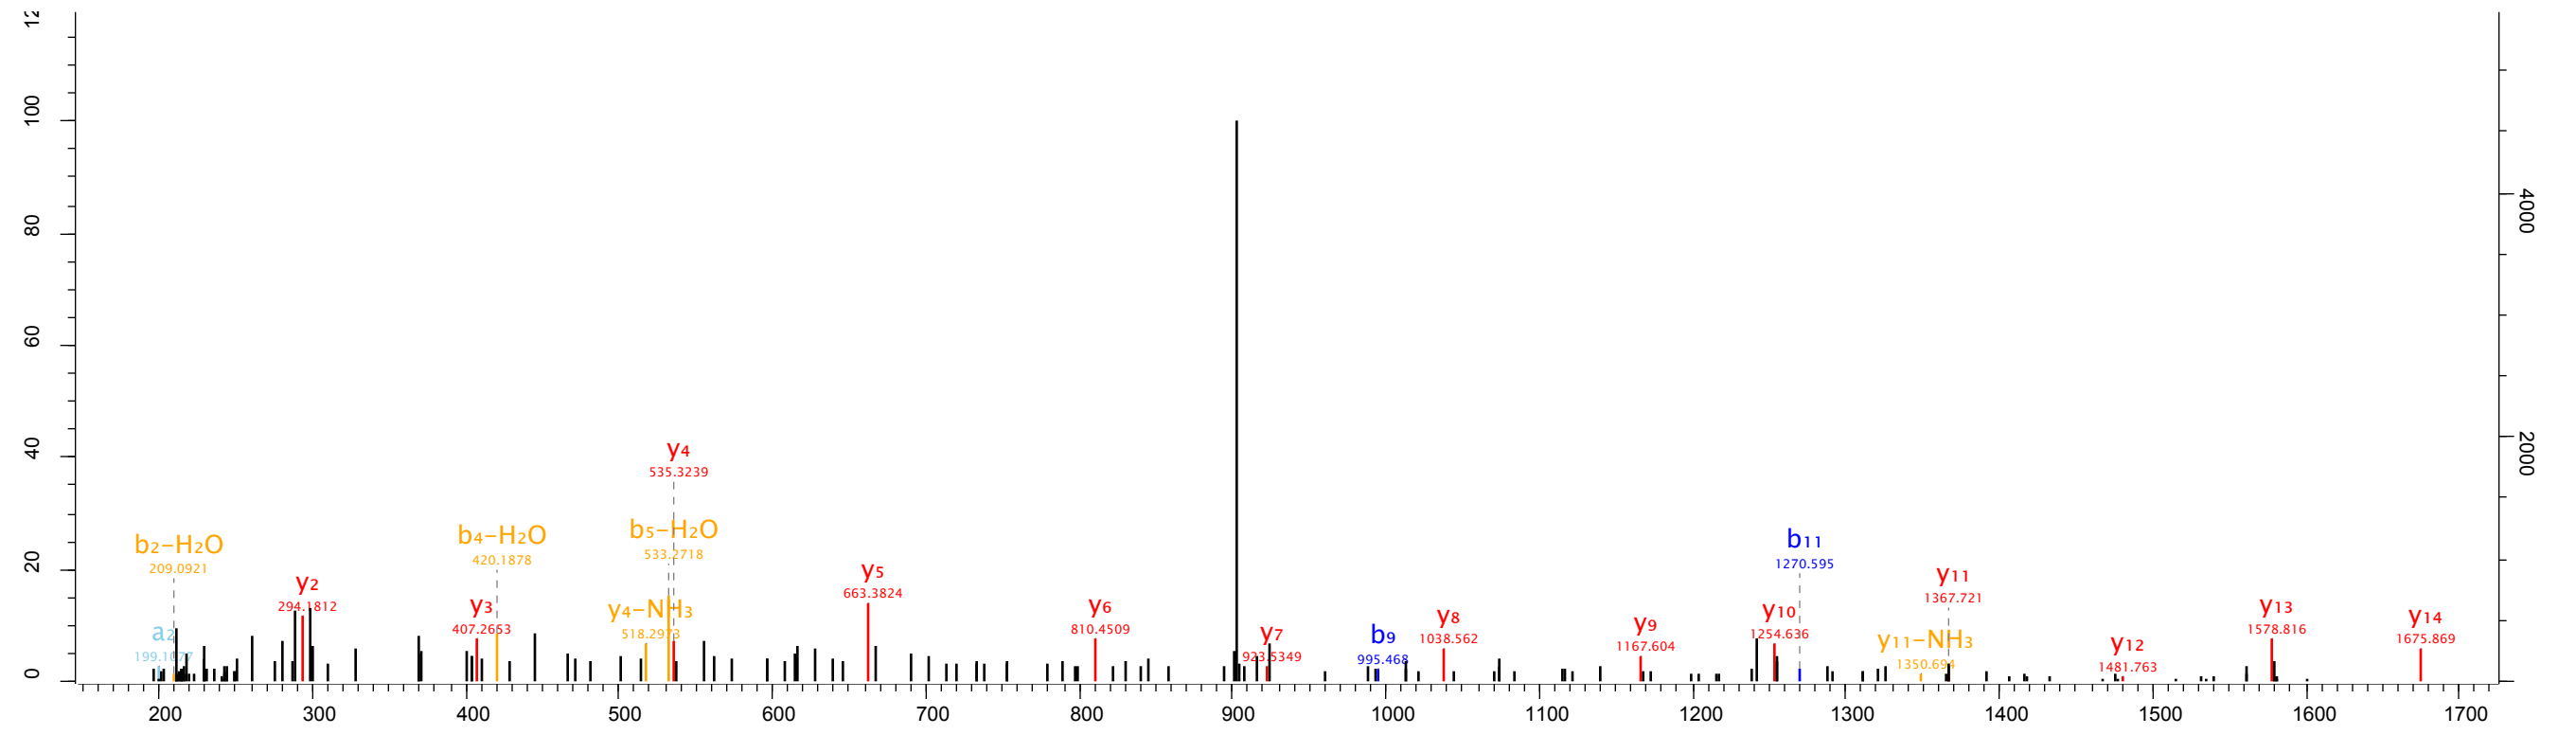

Raw file

UPS1+500ngY\_90minTop17\_BC4\_01\_358

Scan 70852 Method TOF; CID Score 59.37 Mass 2023.12 Gene names SMD1

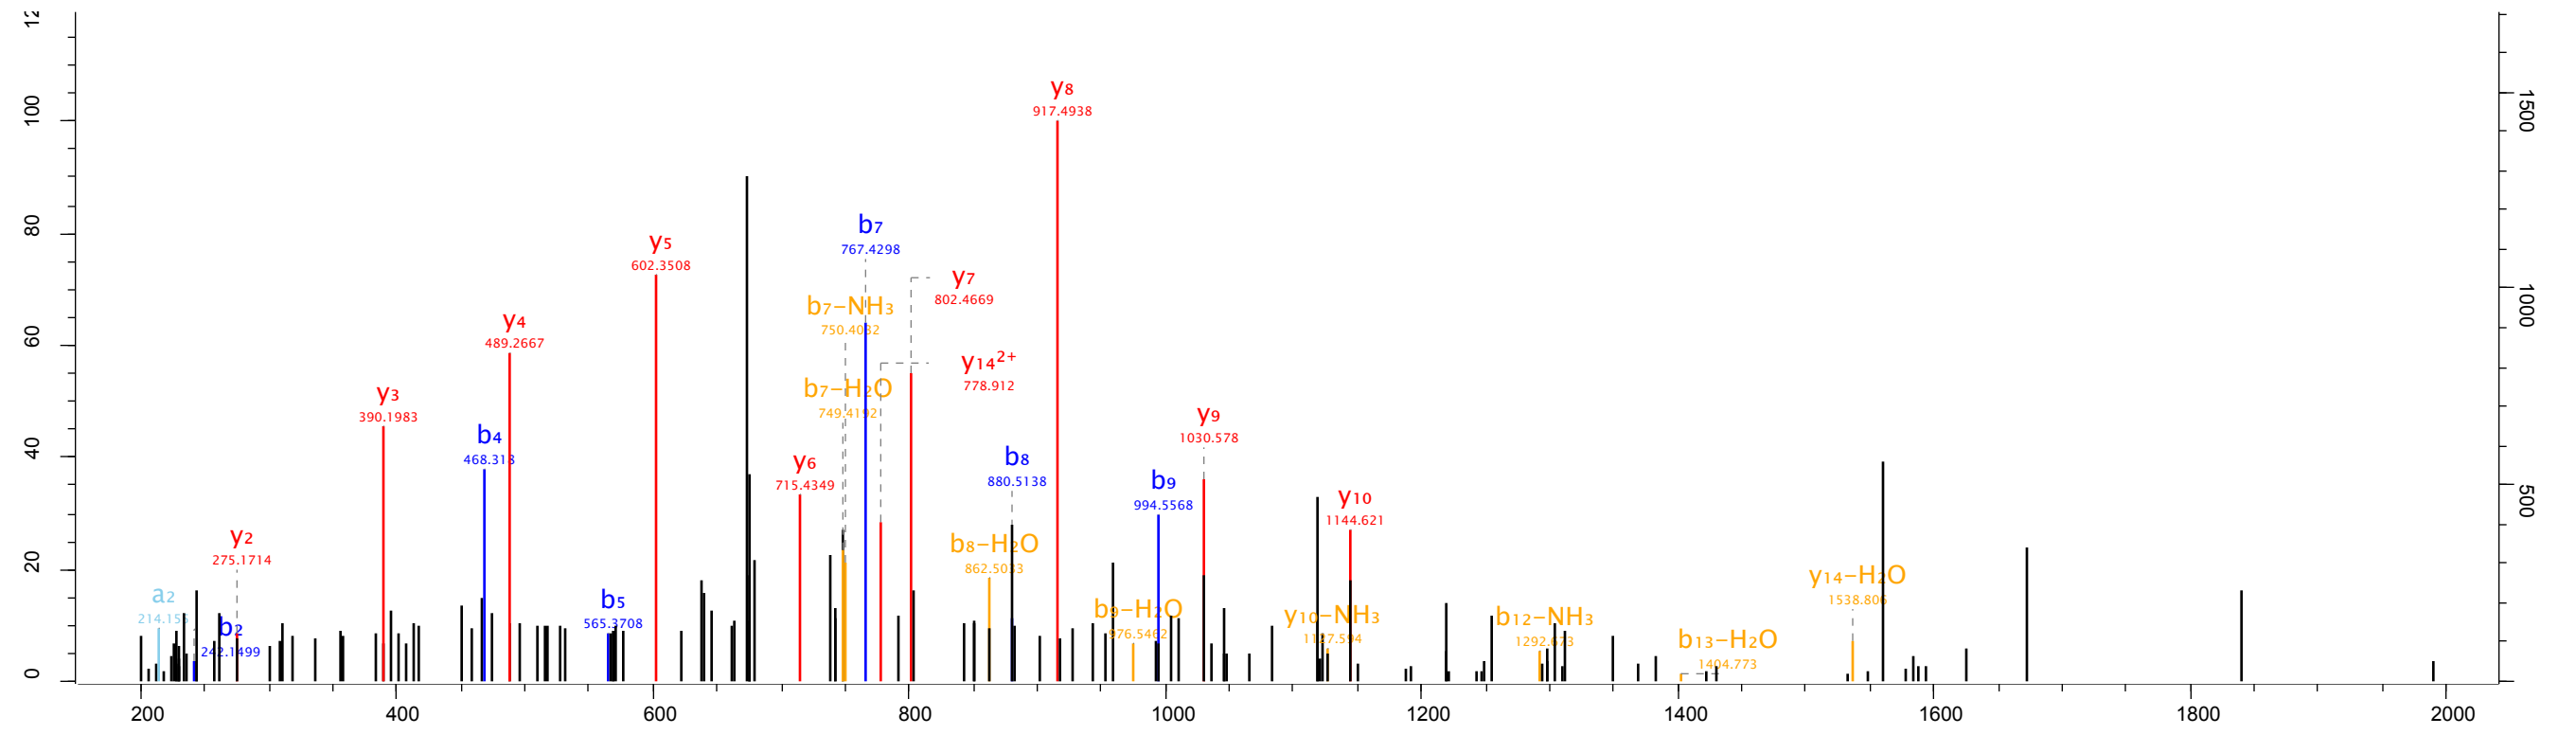

Raw file  
UPS1+500ngY\_90minTop17\_BC4\_01\_358

| Scan  | Method   | Score | Mass    | Gene names |
|-------|----------|-------|---------|------------|
| 72382 | TOF; CID | 35.68 | 2496.13 | YVH1       |

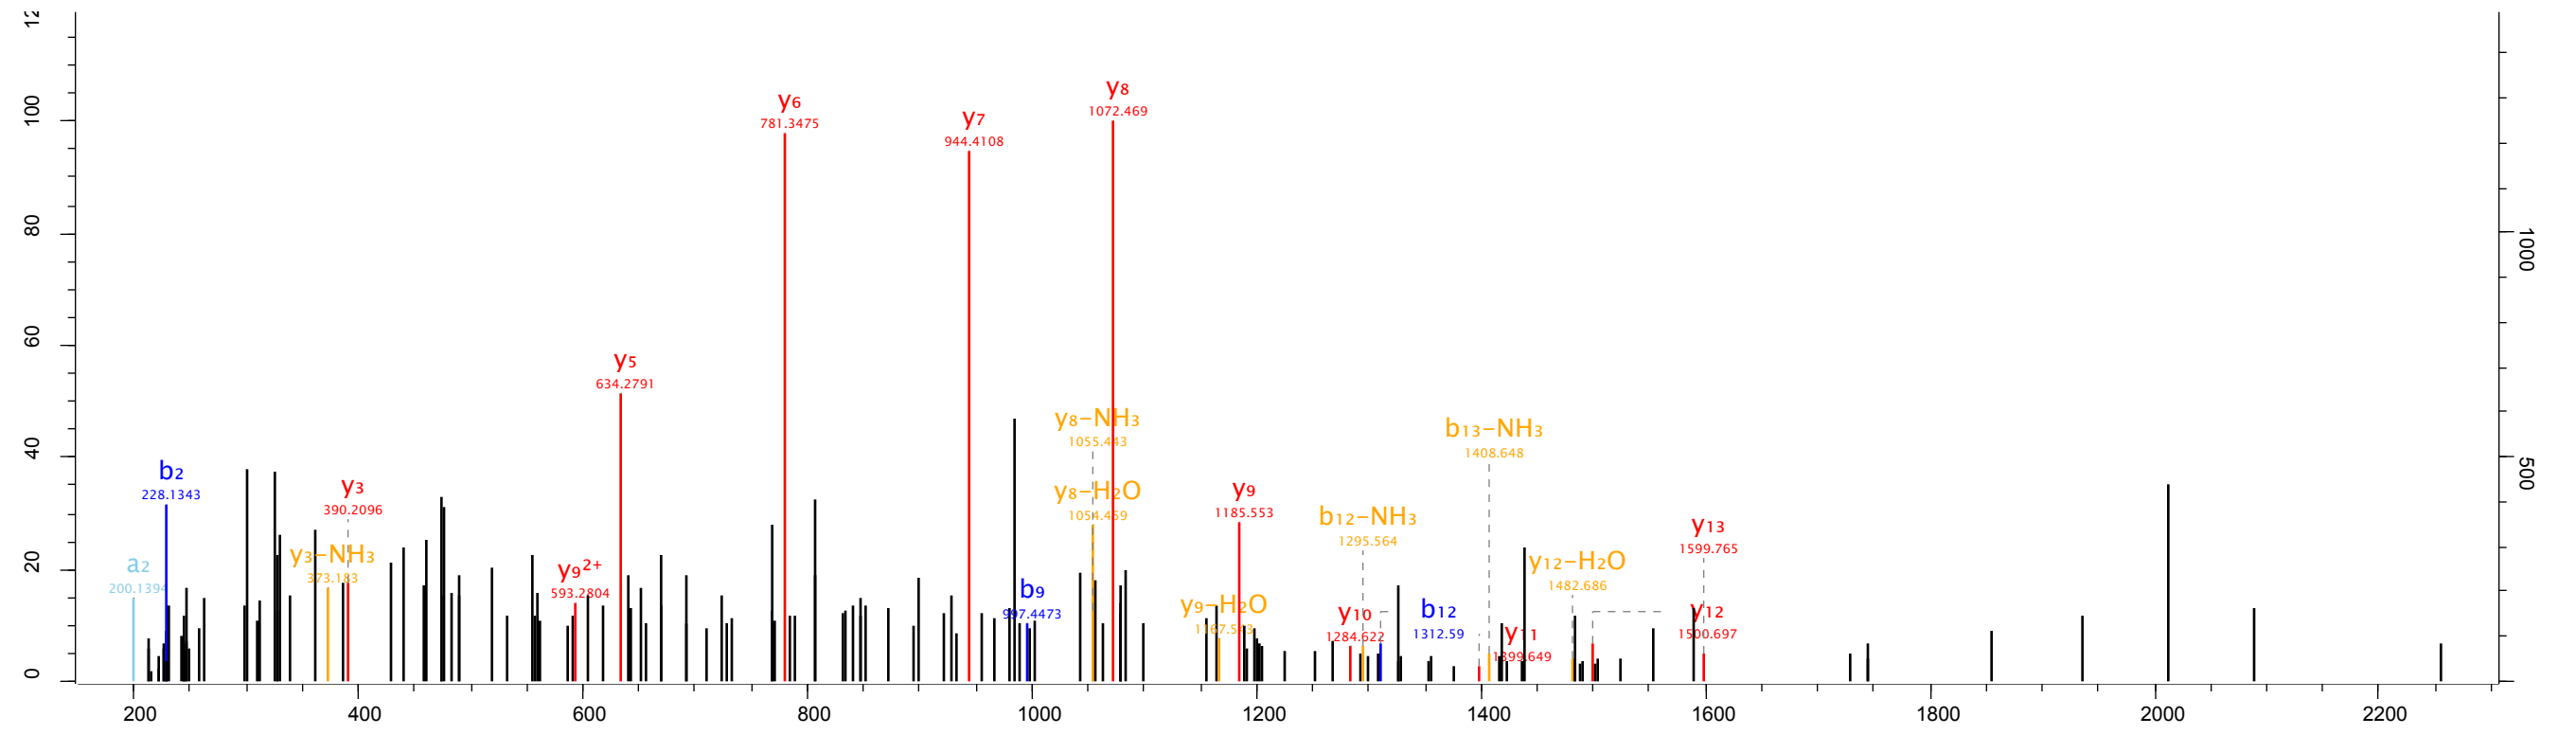

Raw file  
UPS1+500ngY\_90minTop17\_BC4\_01\_358

| Scan  | Method   | Score | Mass    | Gene names |
|-------|----------|-------|---------|------------|
| 72569 | TOF; CID | 43.79 | 1853.04 | RKM1       |

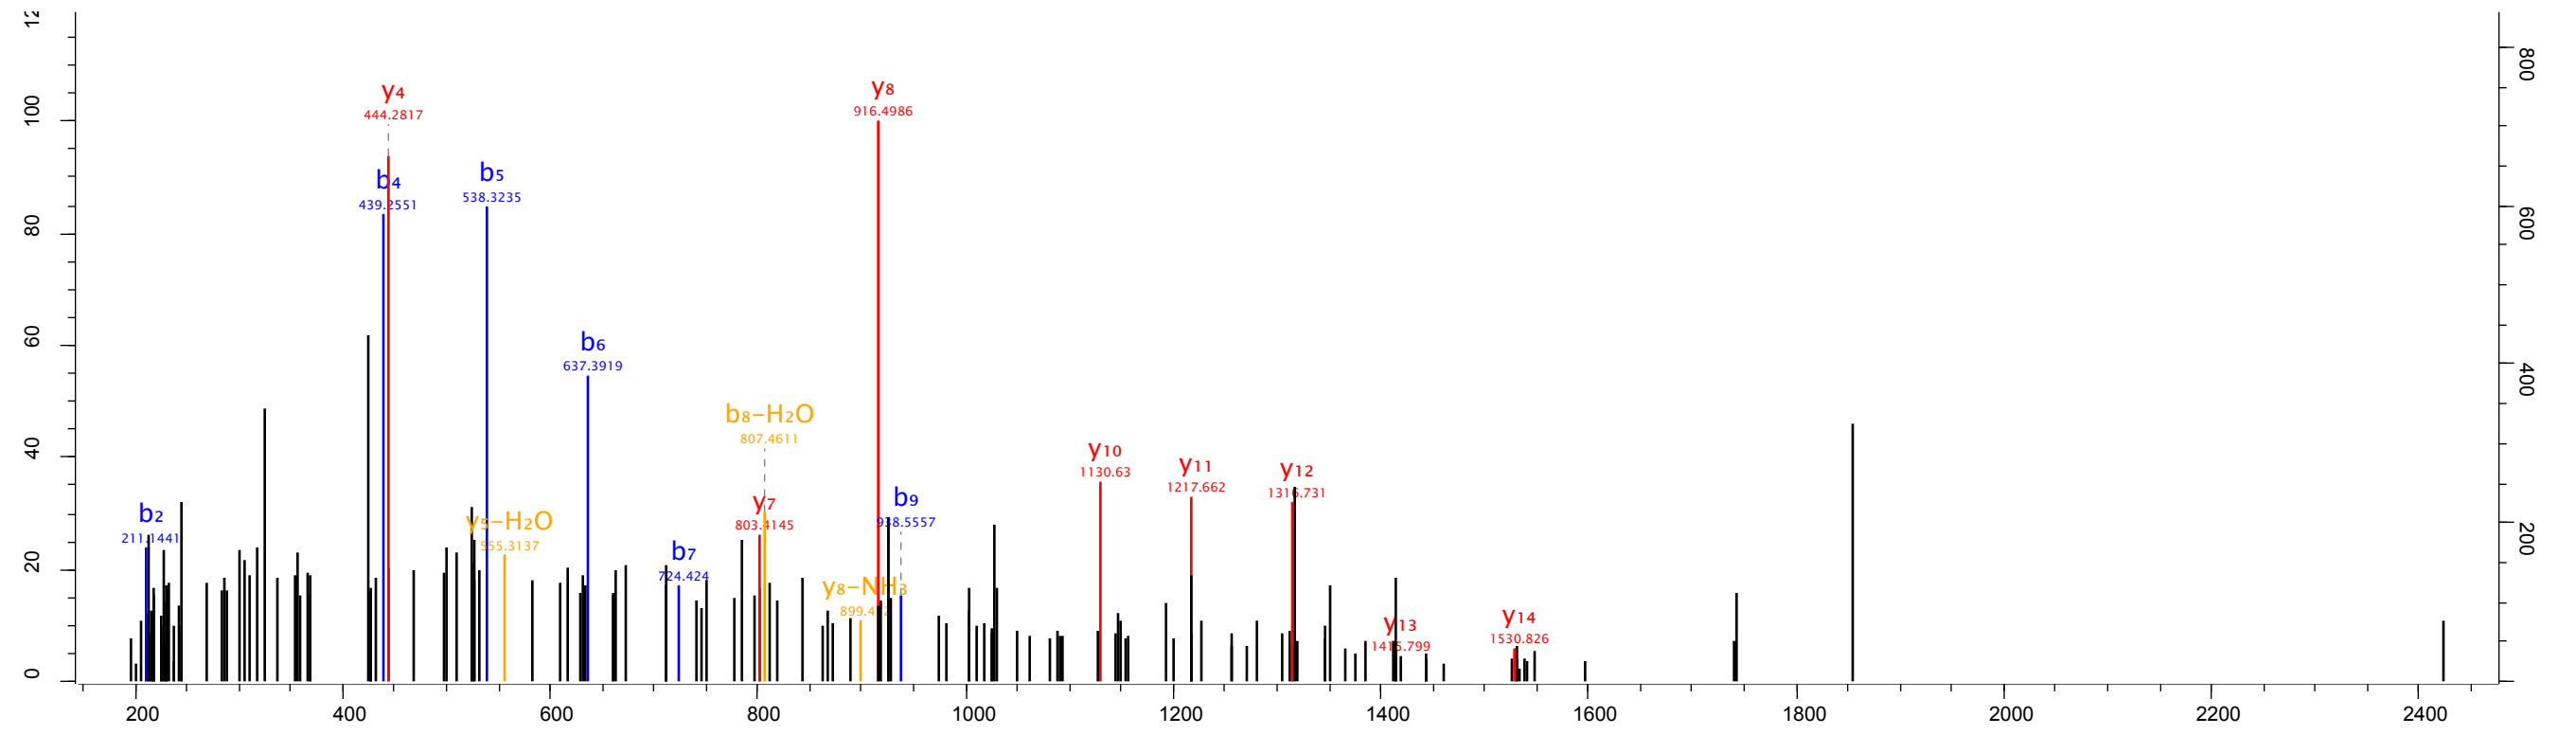

Raw file  
UPS1+500ngY\_90minTop17\_BC4\_01\_358  
Scan 73159 Method TOF; CID Score 40.62 Mass 1881.92 Gene names POF1

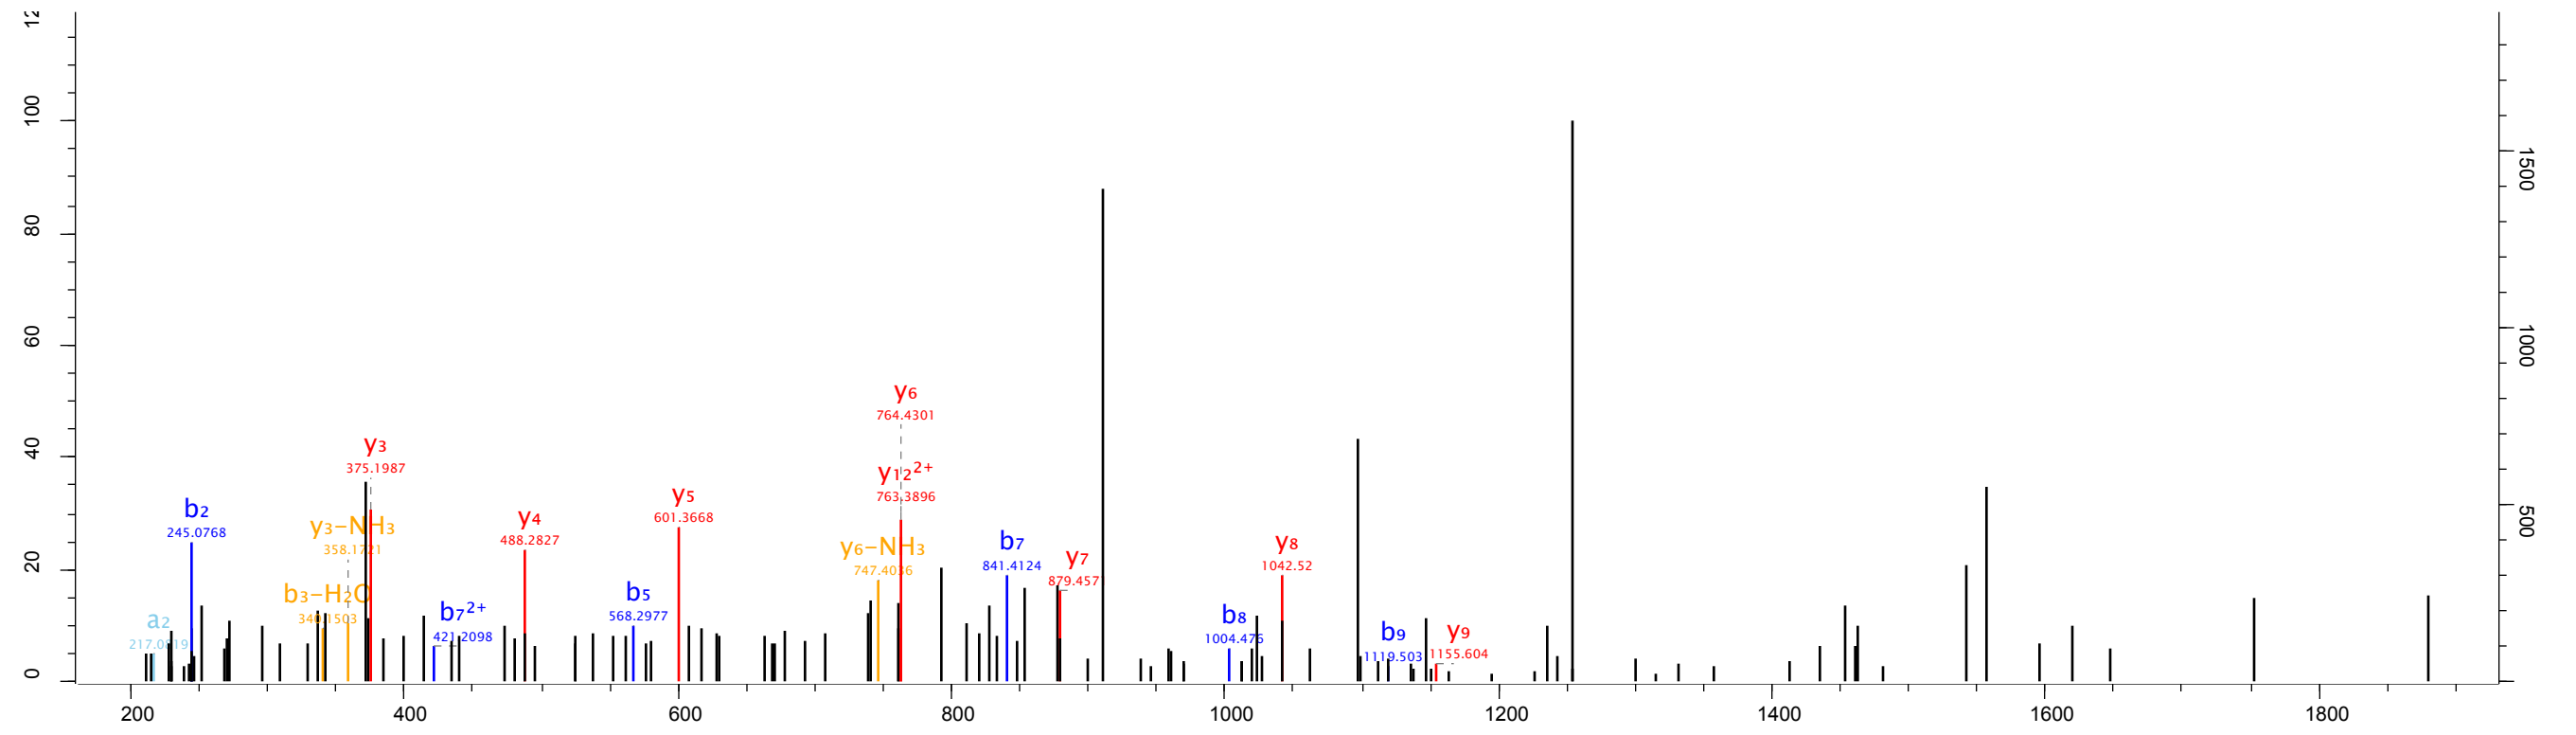

Raw file  
UPS1+500ngY\_90minTop17\_BC4\_01\_358  
Scan 73286 Method TOF; CID Score 74.73 Mass 2024.99 Gene names CDC9

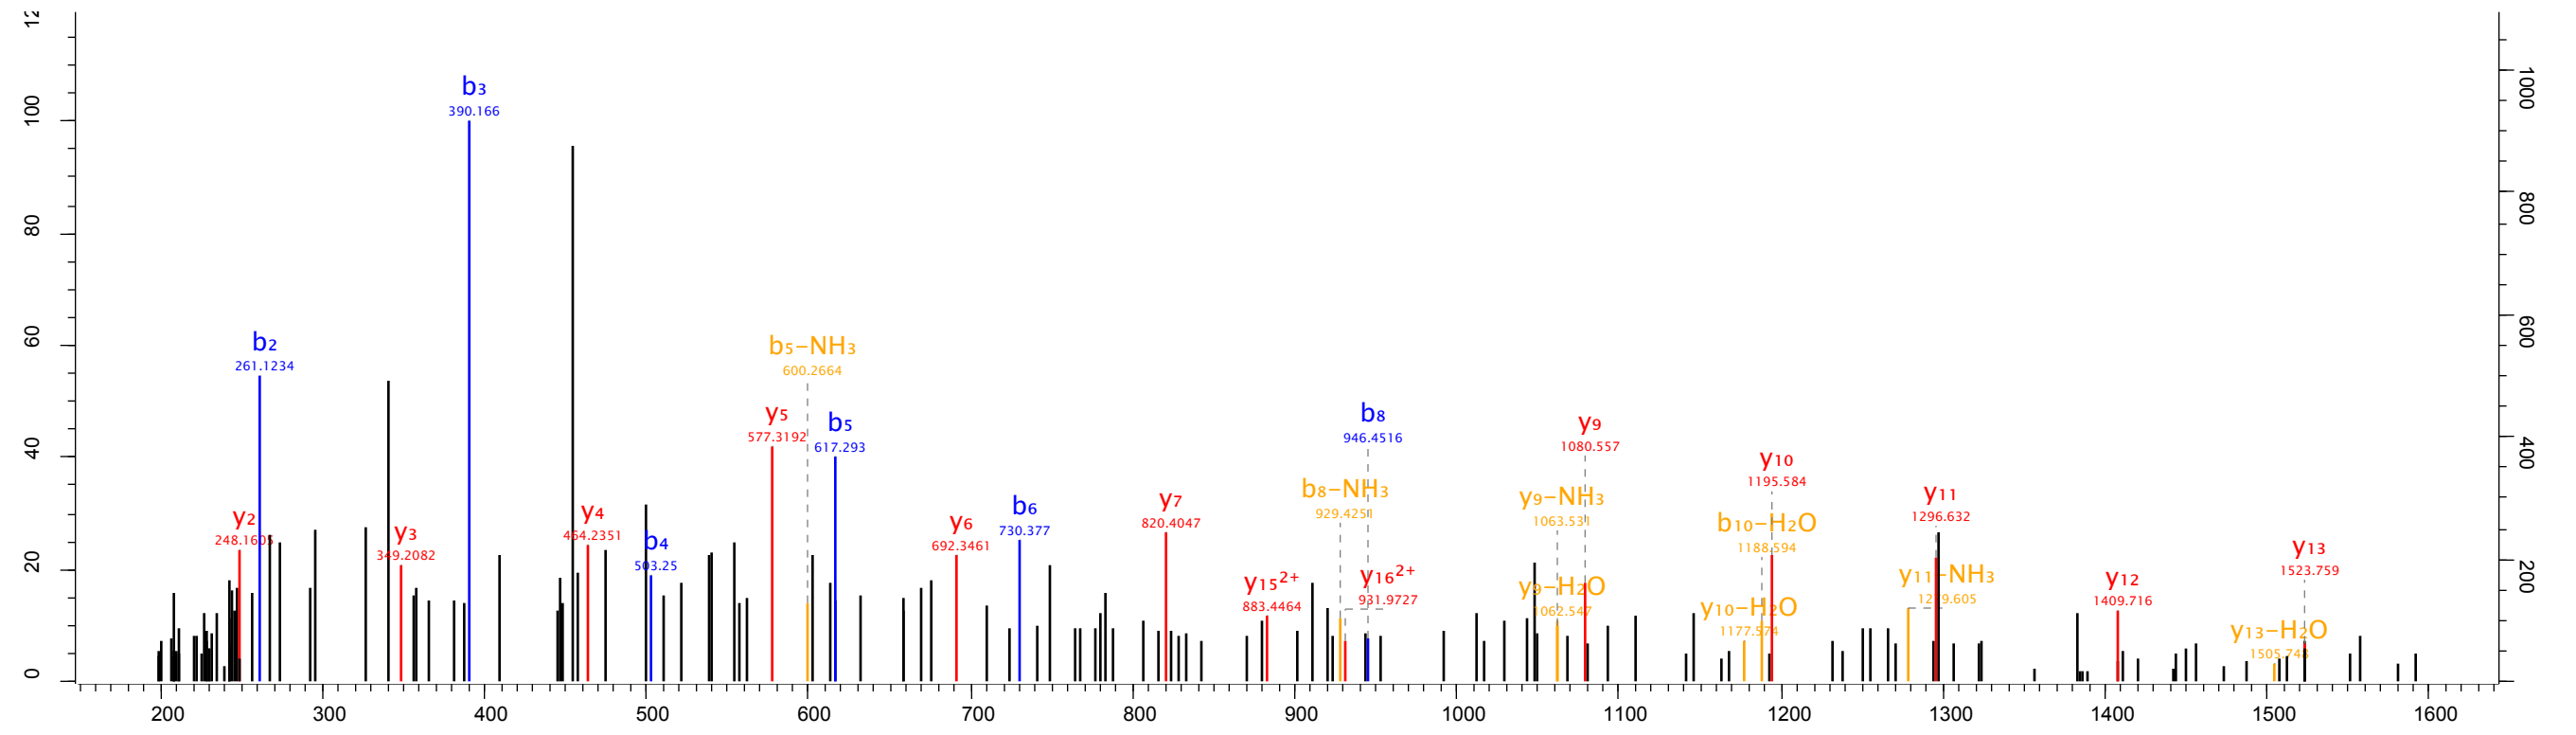

Raw file

UPS1+500ngY\_90minTop17\_BC4\_01\_358

| Scan  | Method   | Score | Mass    | Gene names |
|-------|----------|-------|---------|------------|
| 74727 | TOF; CID | 55.71 | 2559.34 | KAP120     |

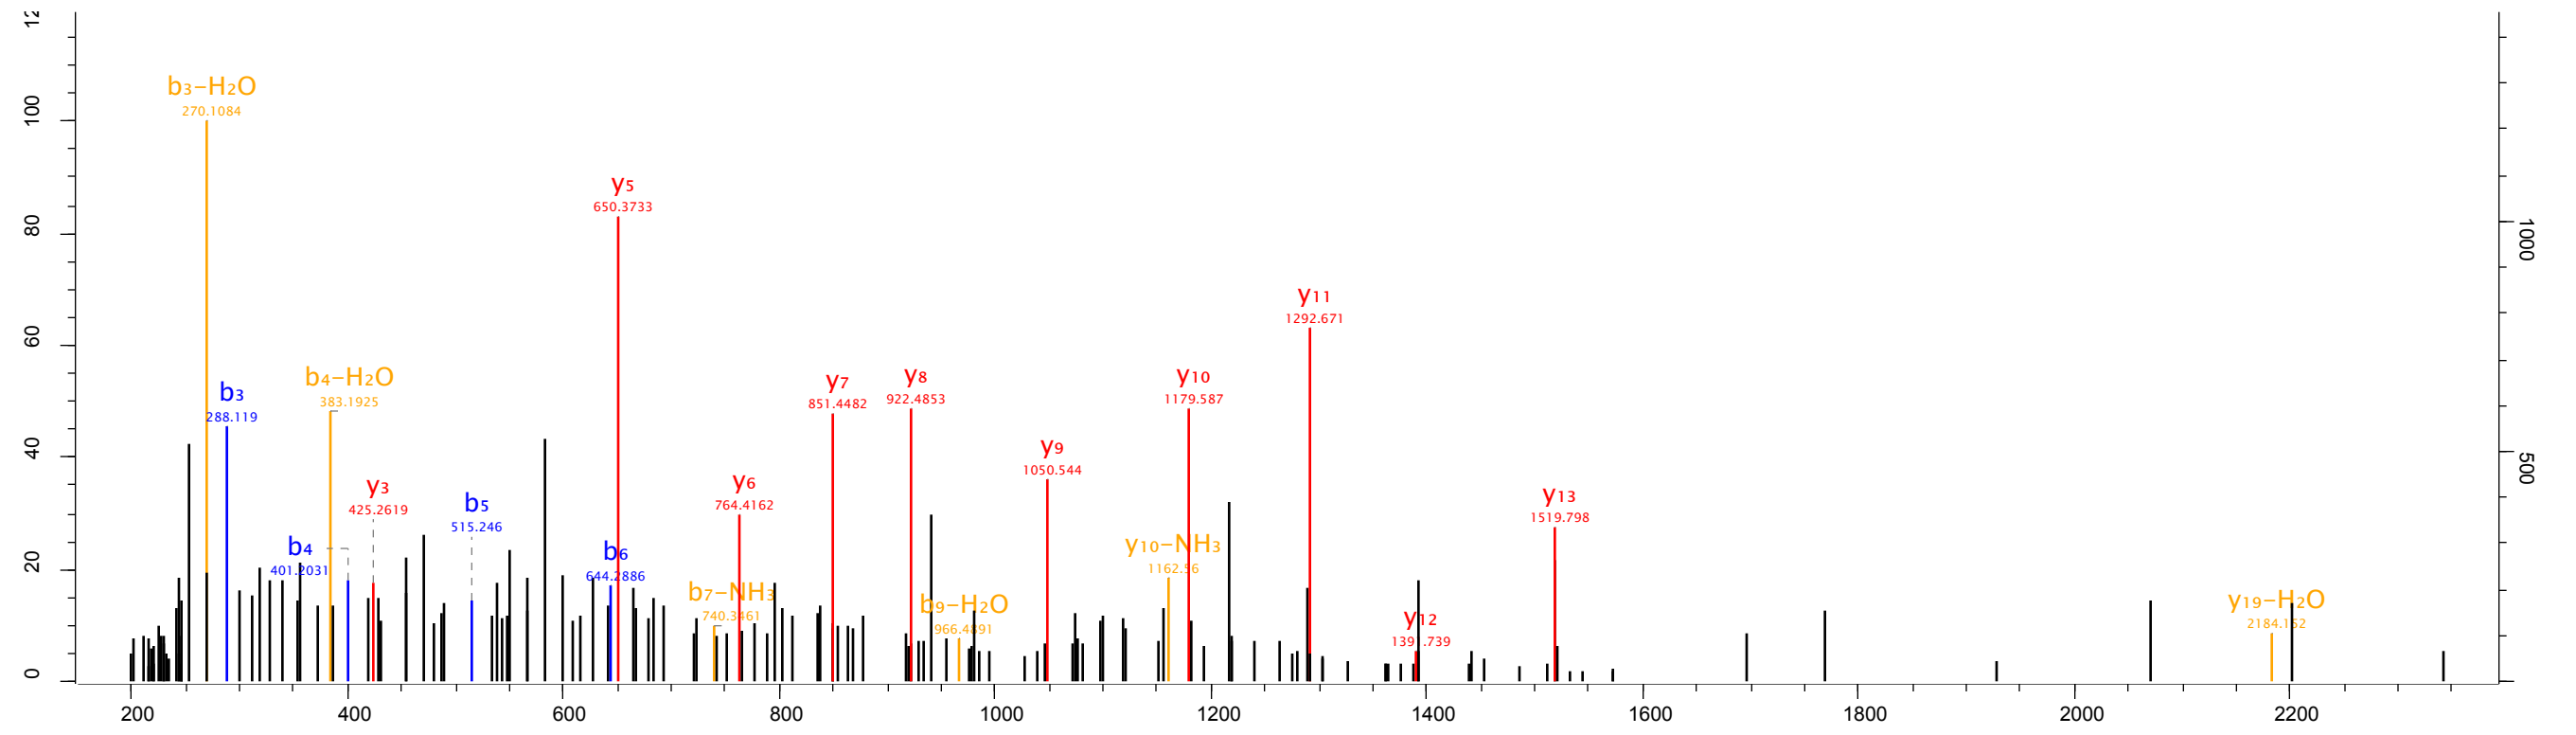

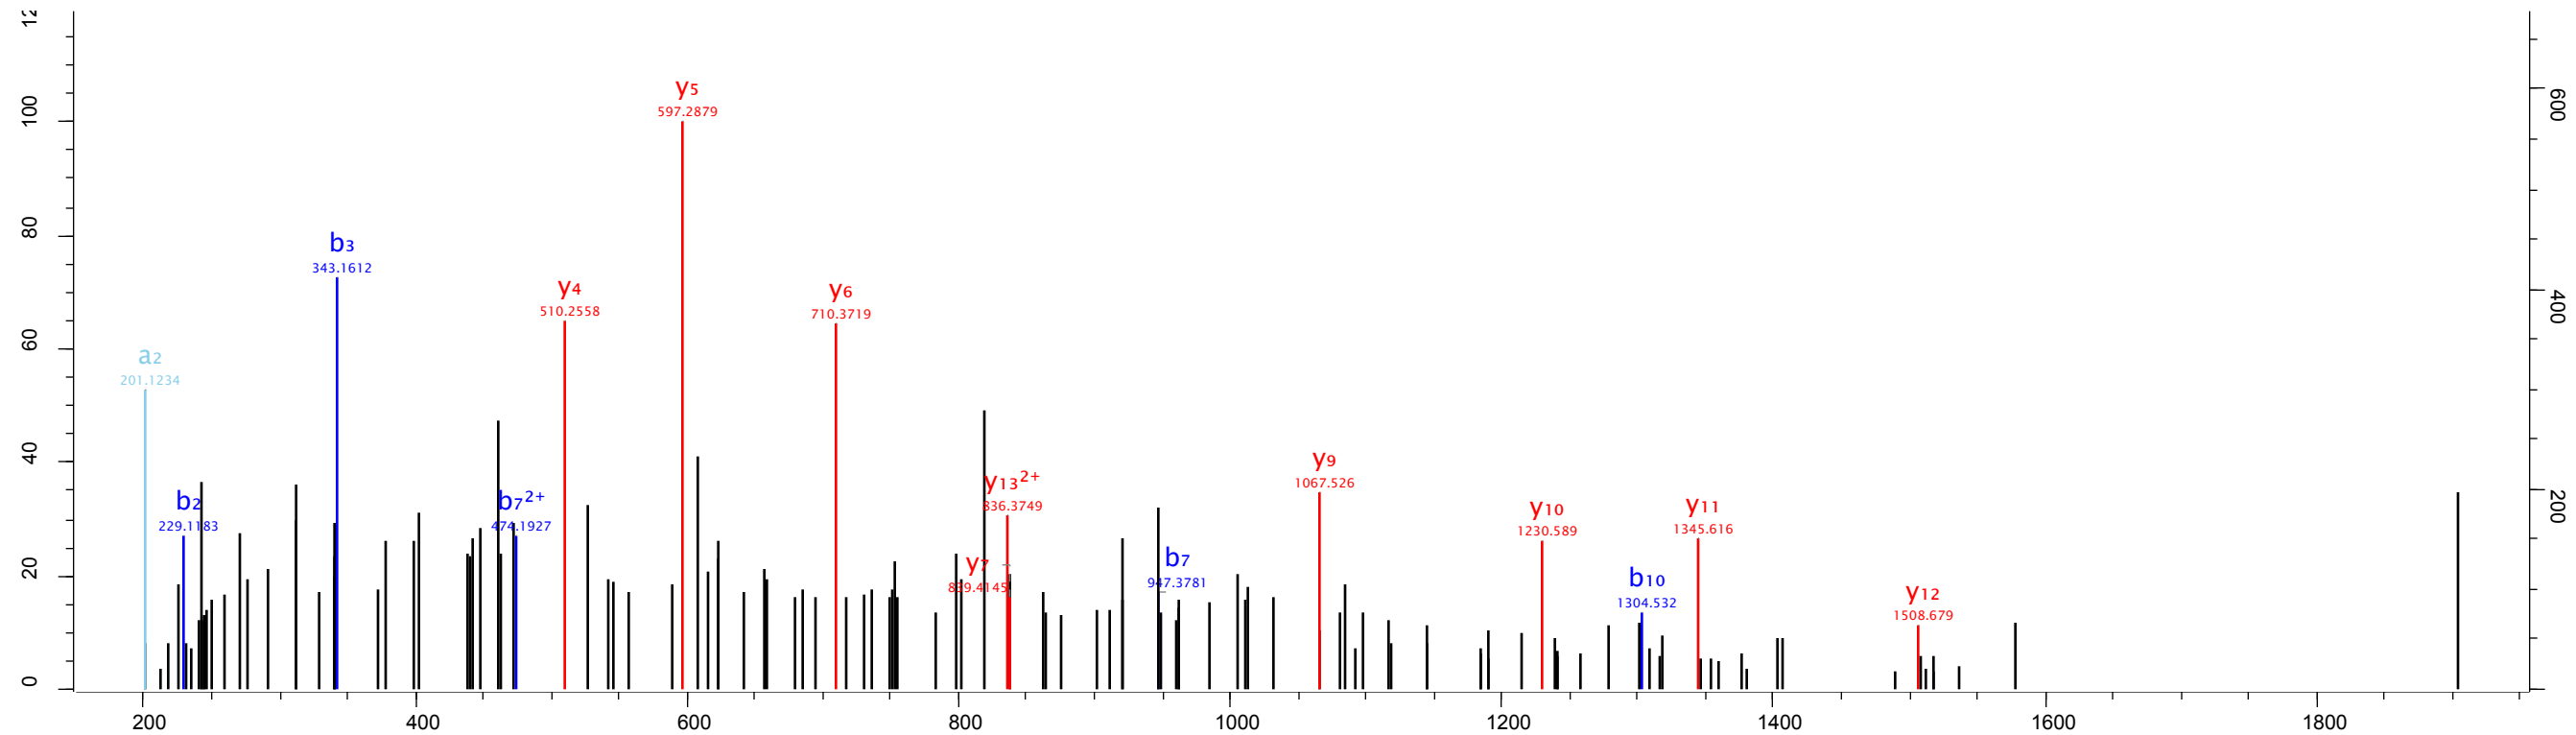



Raw file  
UPS1+500ngY\_90minTop17\_BC4\_01\_358

Scan 75480 Method TOF; CID Score 64.21 Mass 3412.62 Gene names VPS75

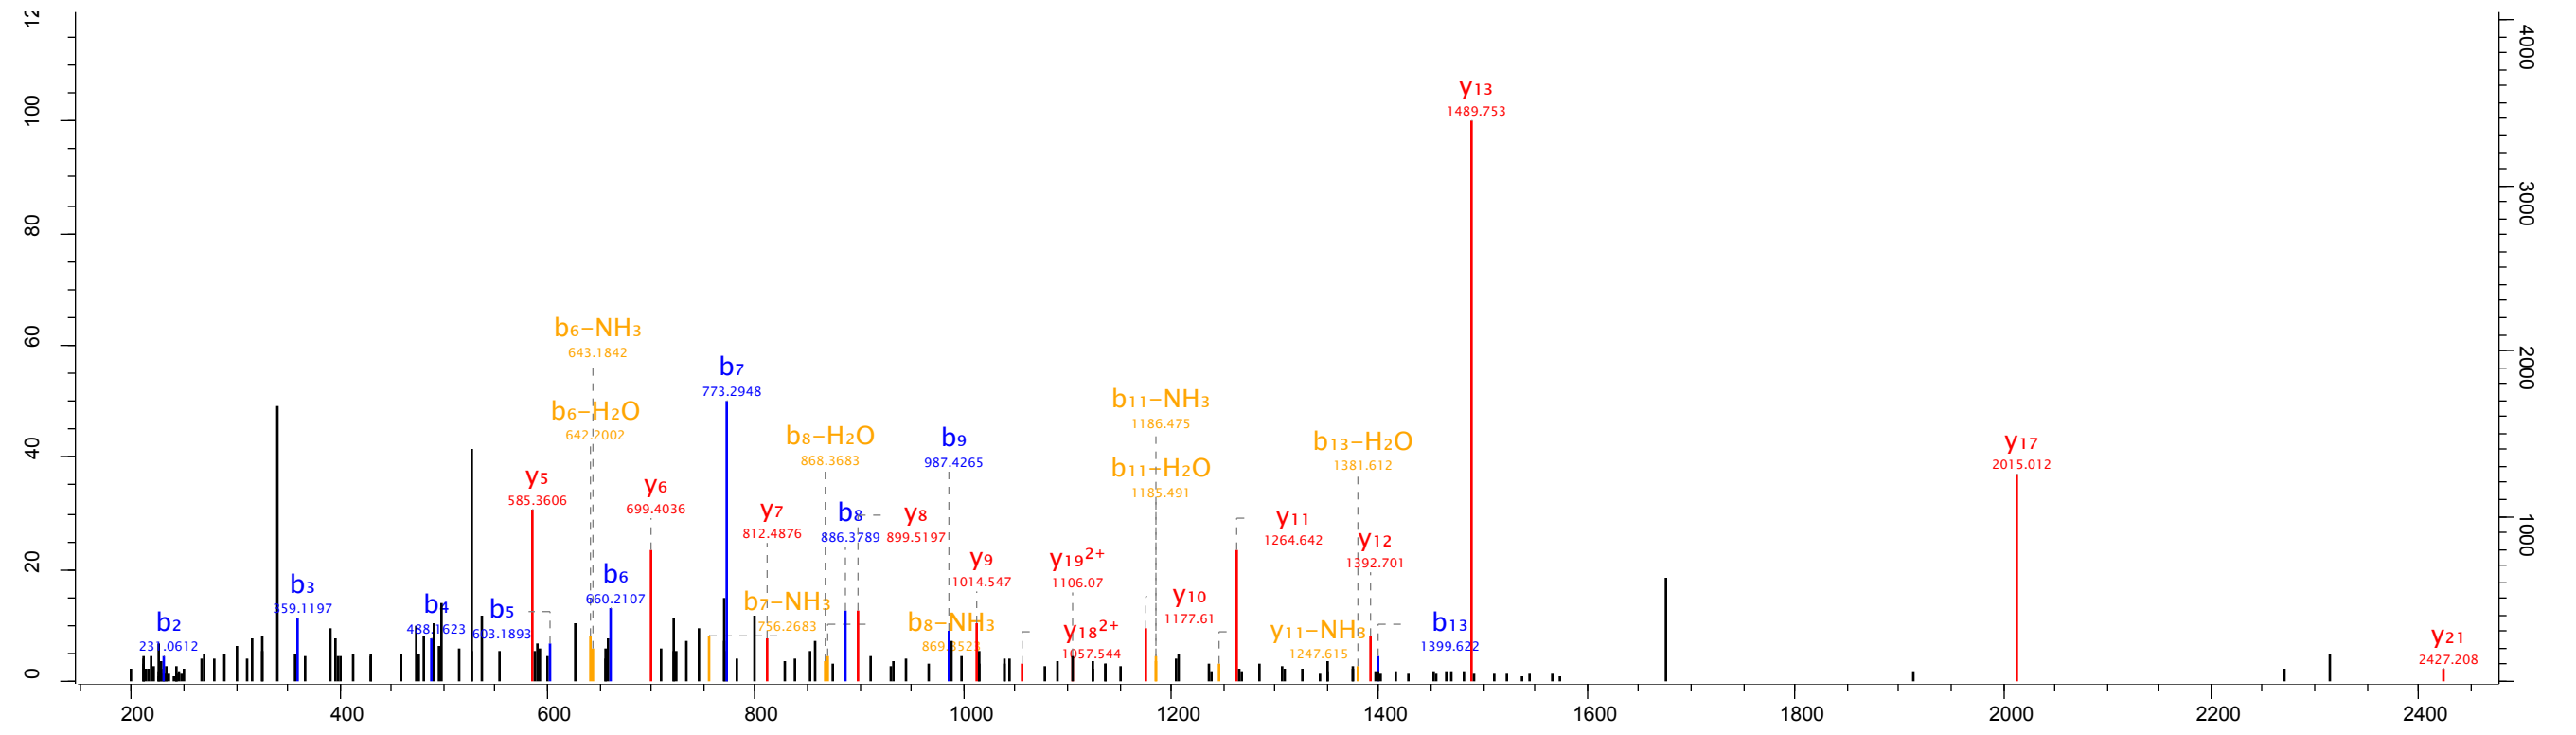

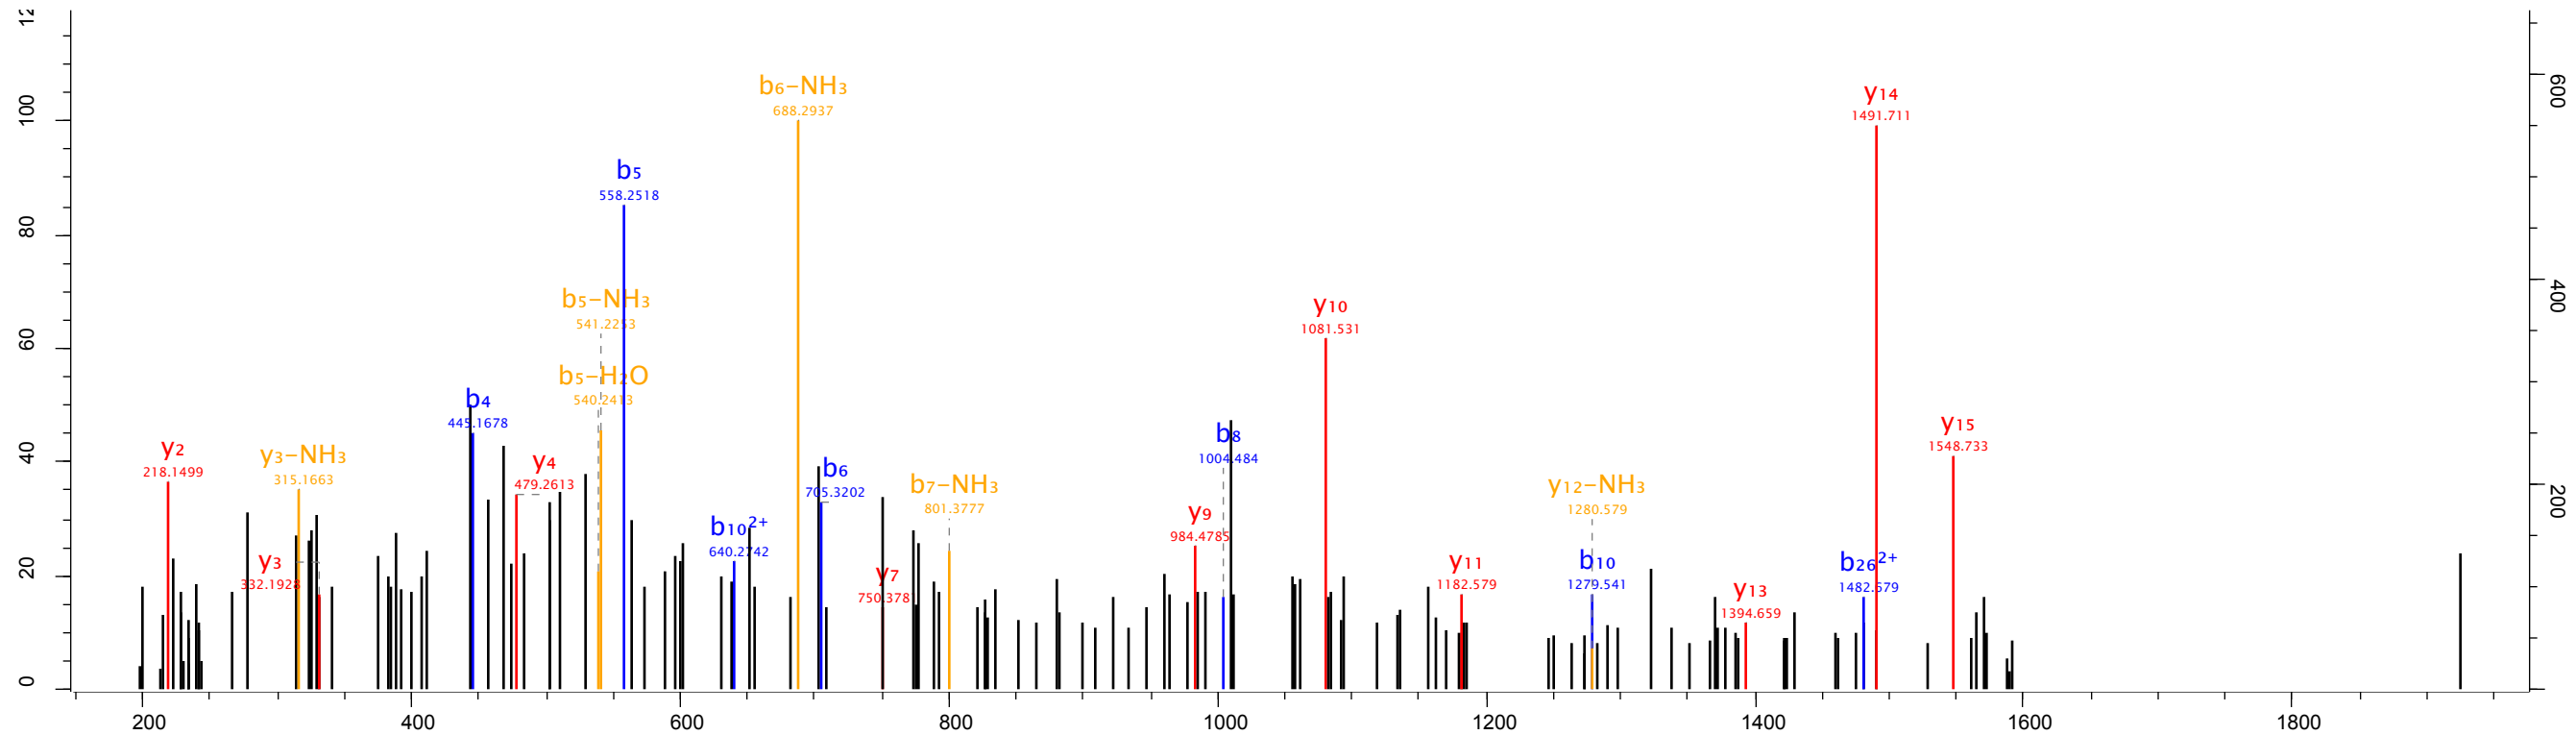

Raw file  
UPS1+500ngY\_90minTop17\_BC4\_01\_358

| Scan  | Method   | Score | Mass    | Gene names |
|-------|----------|-------|---------|------------|
| 75631 | TOF; CID | 59.98 | 2335.16 | COA3       |

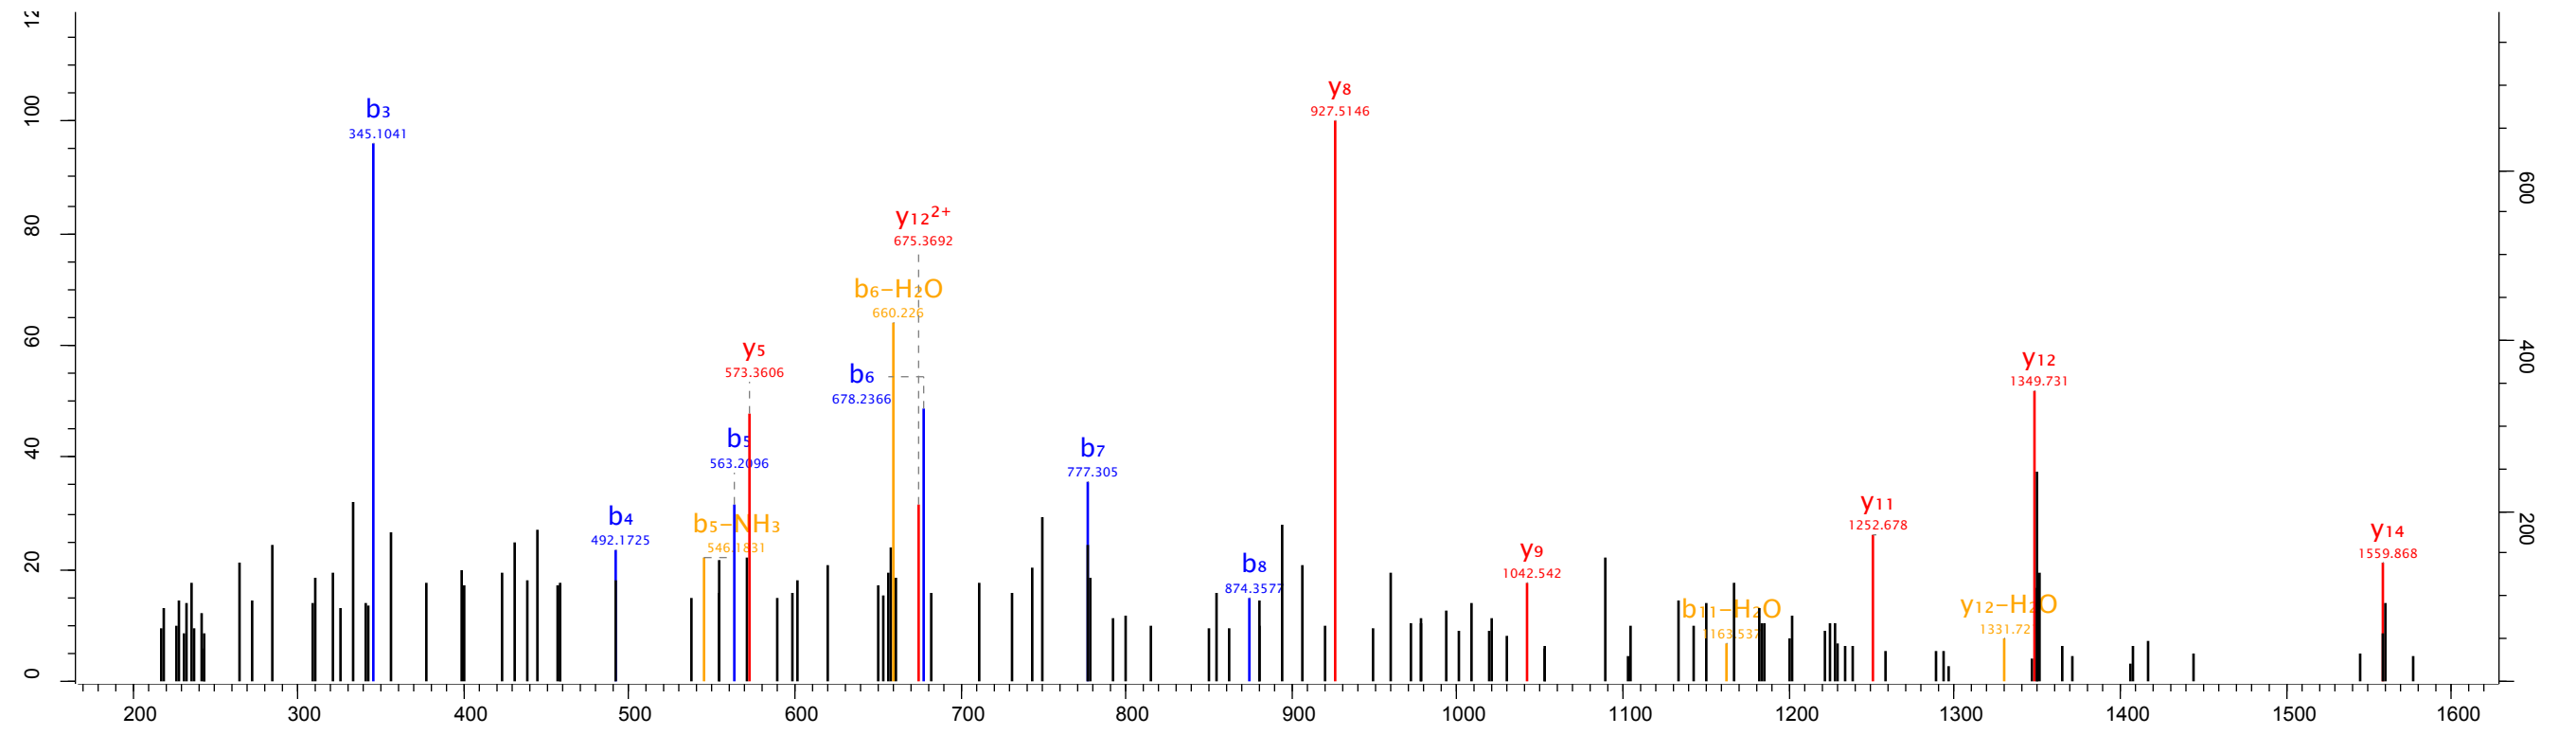

Raw file  
UPS1+500ngY\_90minTop17\_BC4\_01\_358

Method: TOF; CID  
Scan: 77943  
Score: 30.78  
Mass: 2397.17  
Gene names: BZZ1

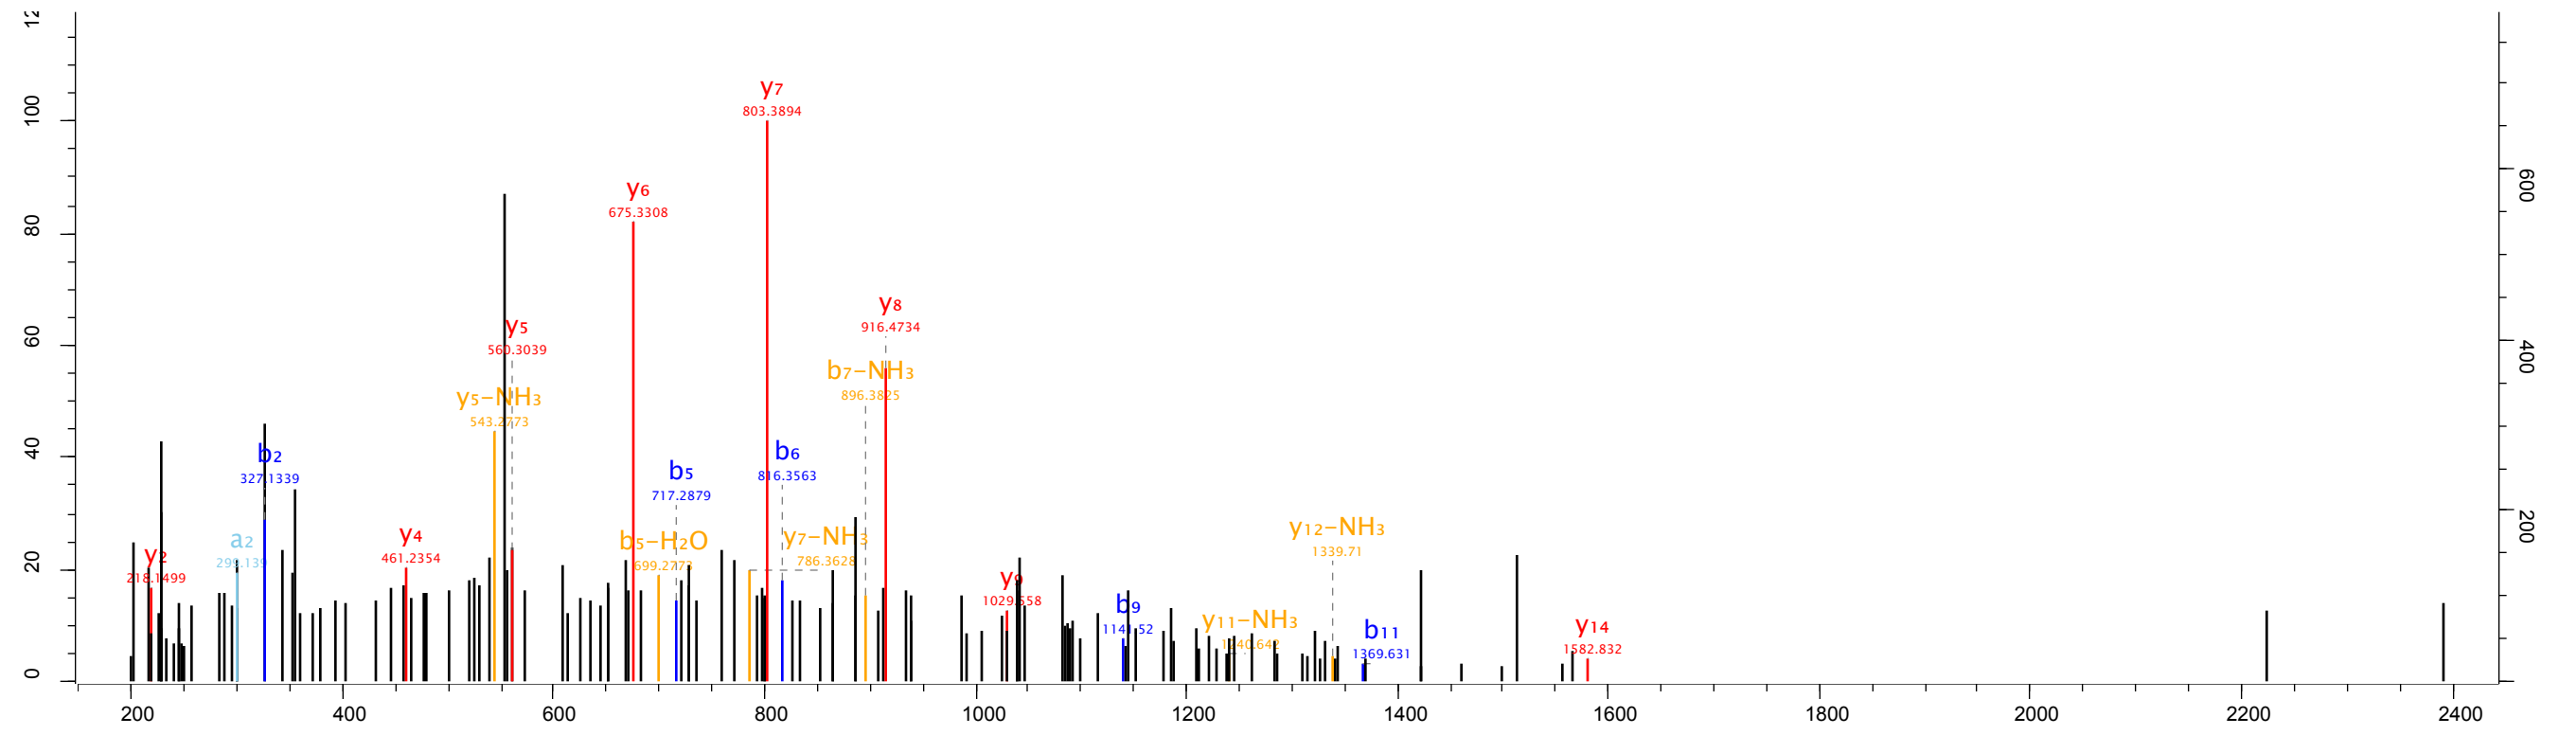

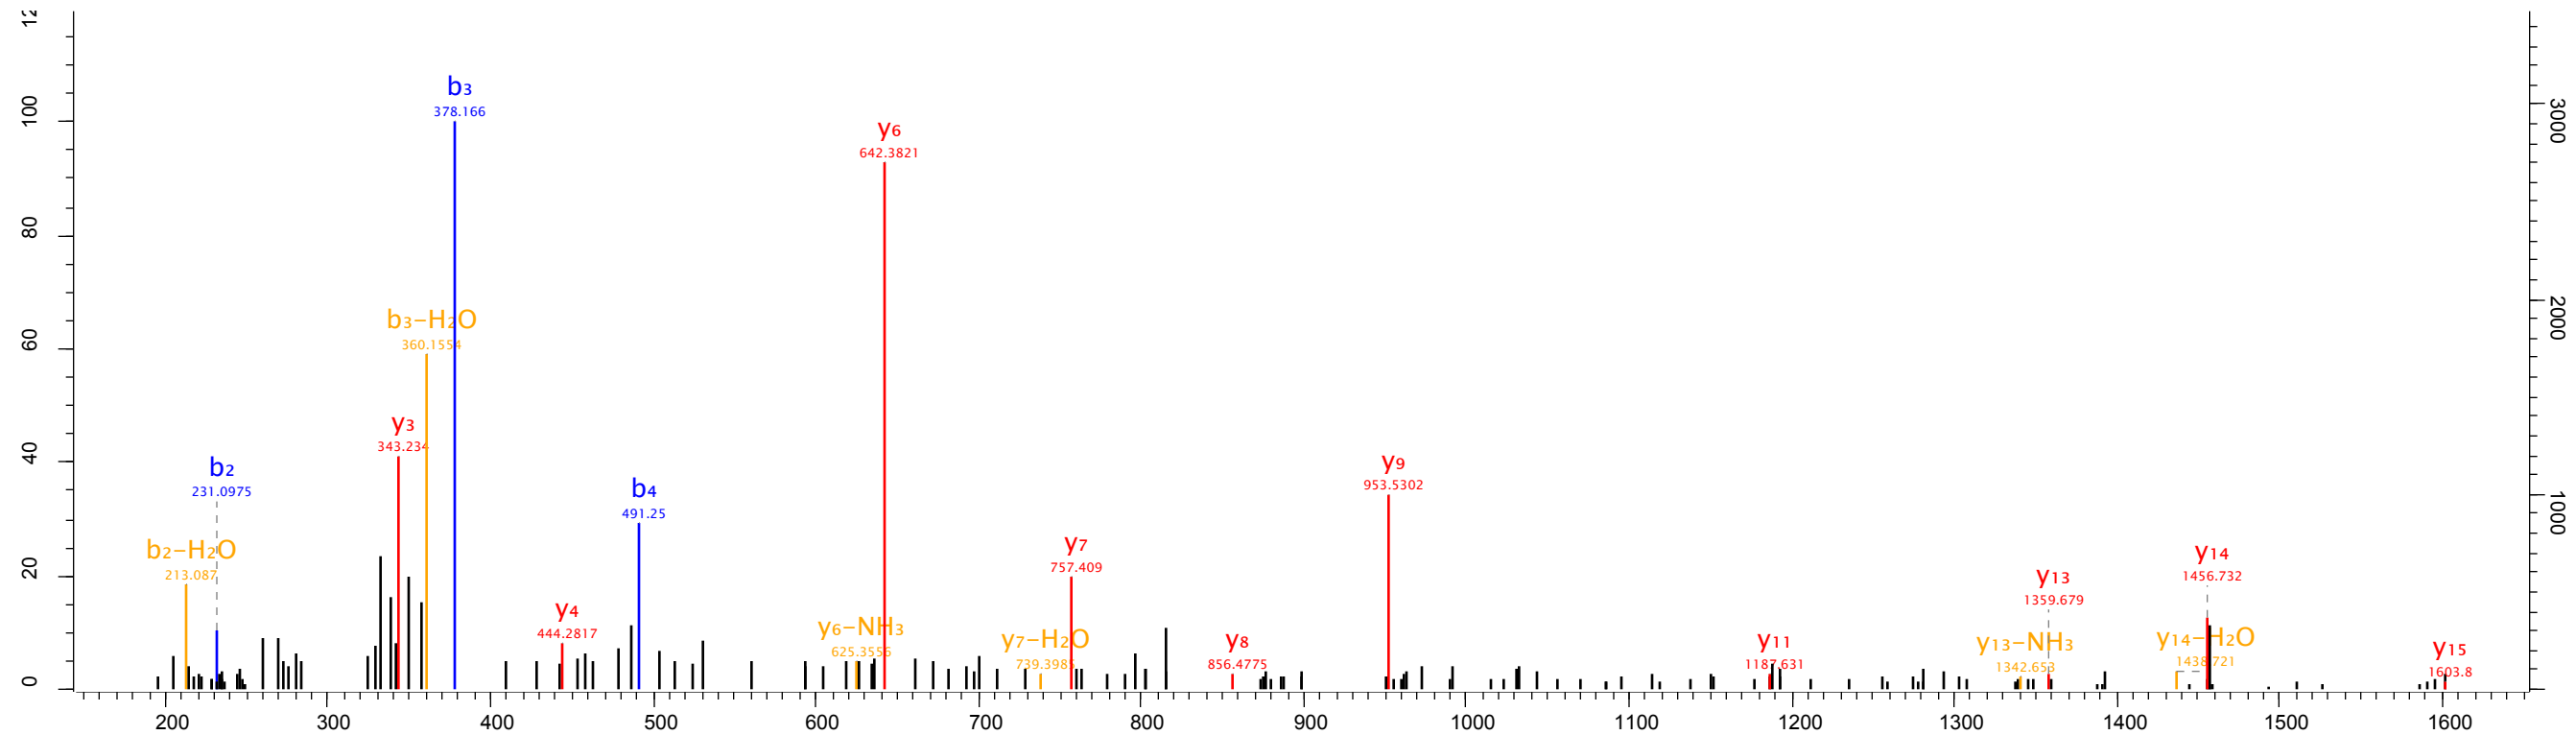

UPS1+500ngY\_90minTop17\_BC4\_01\_358

78380

TOF; CID

82.61

2345.27

SEC61

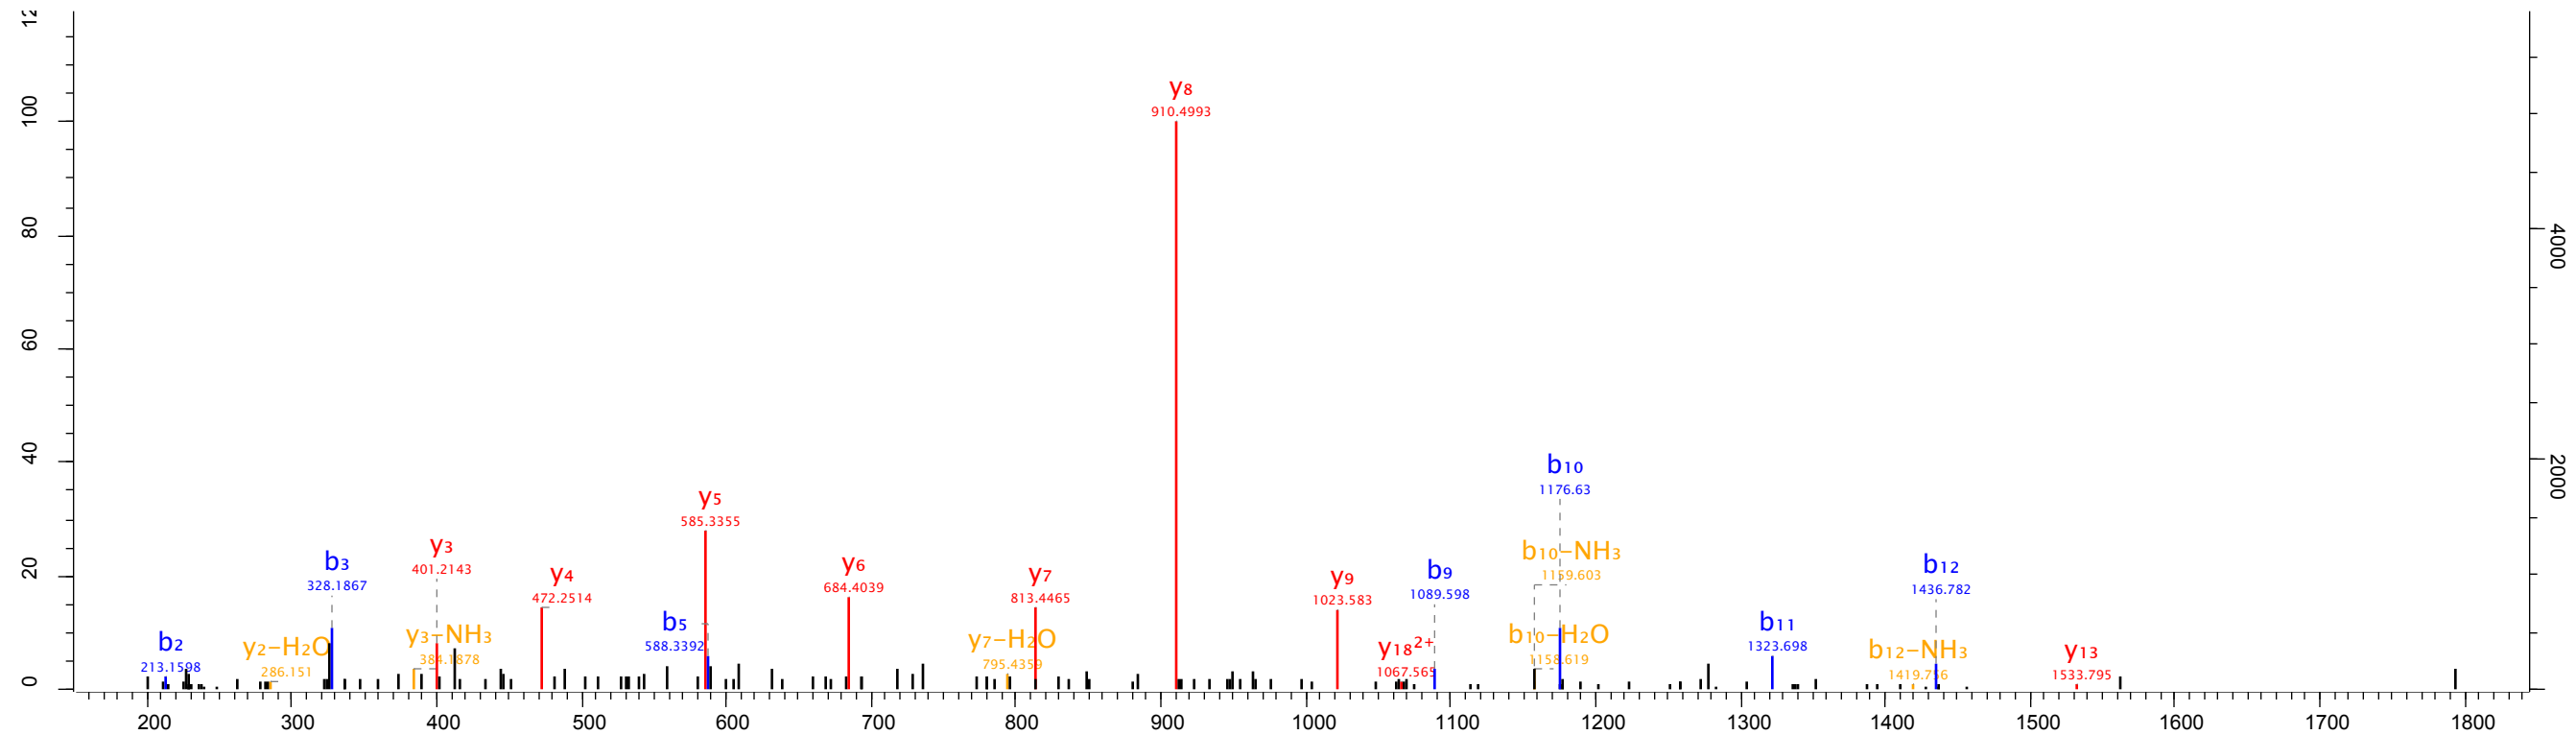

Raw file  
UPS1+500ngY\_90minTop17\_BC4\_01\_358

Scan 84073 Method TOF; CID Score 90.39 Mass 2166.26 Gene names TSR1

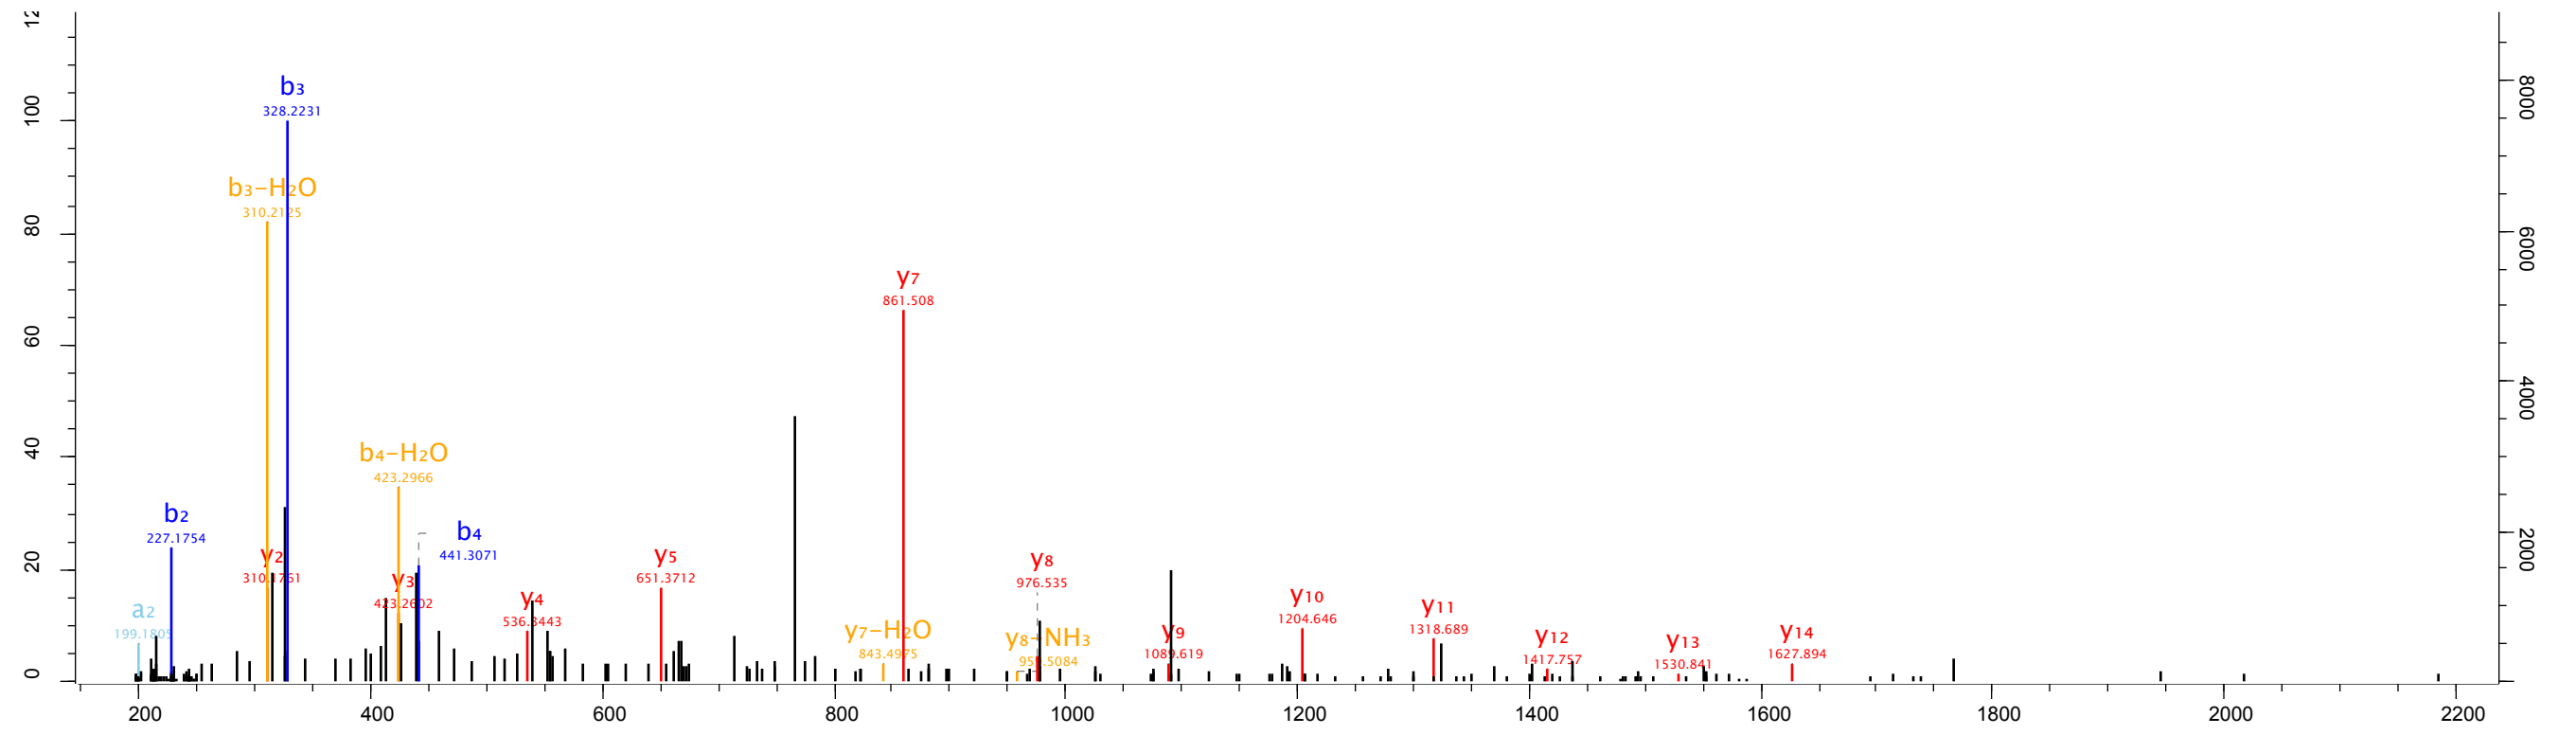

Raw file

UPS1+500ngY\_90minTop17\_BC4\_01\_358

| Scan  | Method   | Score | Mass    | Gene names |
|-------|----------|-------|---------|------------|
| 84517 | TOF; CID | 71.45 | 1111.57 | DID4       |

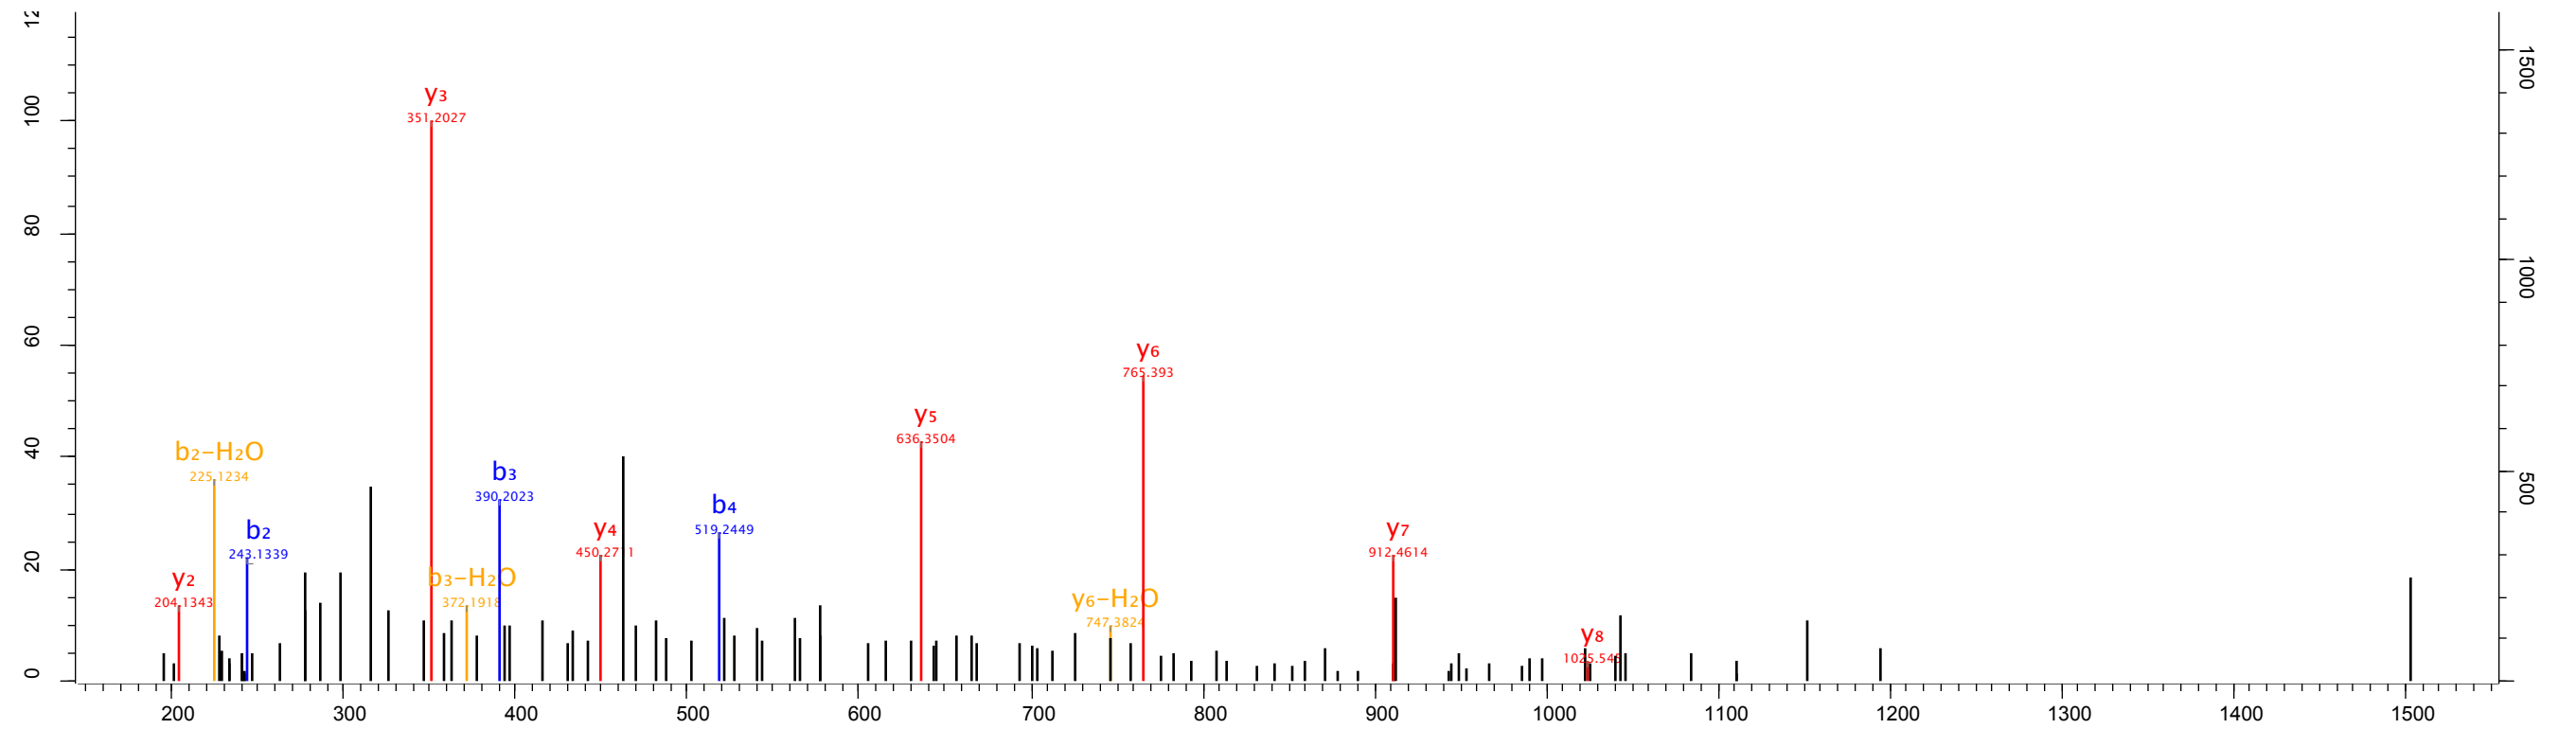

Supplement: supp_M114.047407_mcp.M114.047407-7.pdf [file supp_M114.047407_mcp.M114.047407-7.pdf]
