# Supplementary material for: The Impact II, a Very High-Resolution Quadrupole Time-of-Flight Instrument (QTOF) for Deep Shotgun Proteomics
Source: PubMed Central journal article supplement (PMC4587313; doi:10.1074/mcp.m114.047407), 2015-05-19

Raw file 20150307\_Hepa1\_Top\_opt\_D1\_01\_1671 Scan 24207 Method TOF; CID Score 89.23 m/z 688.34 Gene names Procr

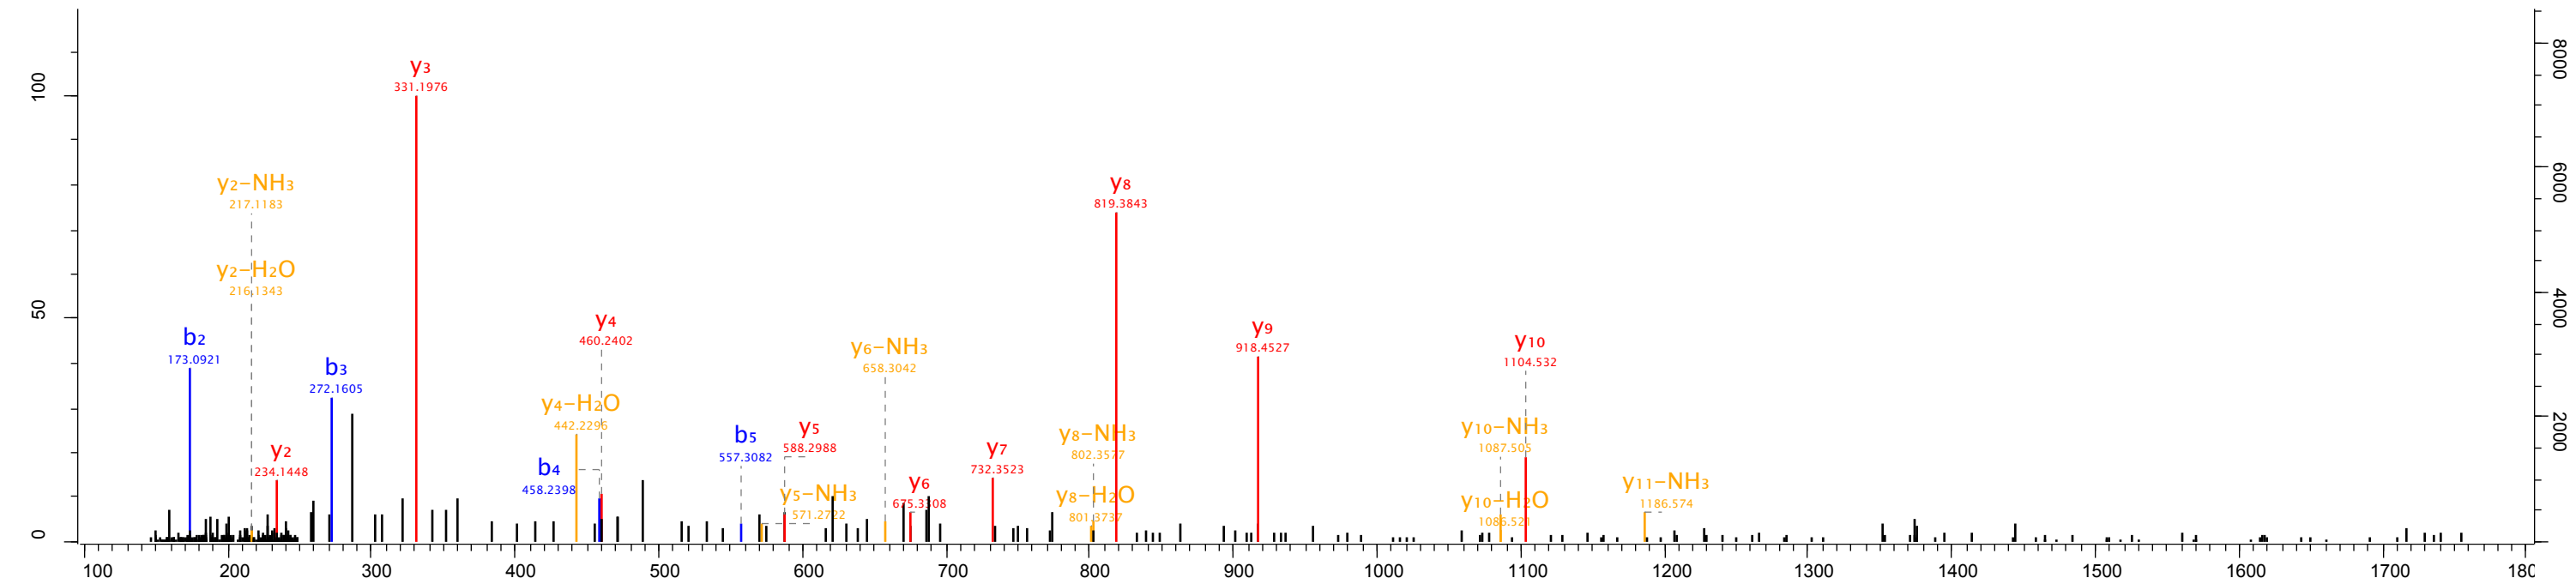

- T A V W V S G S Q E P S K -

Fragmentation mapping (b and y ions):

- b<sub>2</sub> (A)
- b<sub>3</sub> (V)
- b<sub>4</sub> (W)
- b<sub>5</sub> (V)
- y<sub>2</sub> (S)
- y<sub>3</sub> (P)
- y<sub>4</sub> (E)
- y<sub>5</sub> (Q)
- y<sub>6</sub> (S)
- y<sub>7</sub> (G)
- y<sub>8</sub> (S)
- y<sub>9</sub> (V)
- y<sub>10</sub> (W)

Raw file 20150307\_Hepa1\_Top\_opt\_D1\_01\_1671 Scan 28943 Method TOF; CID Score 83.42 m/z 682.65 Gene names Chchd7

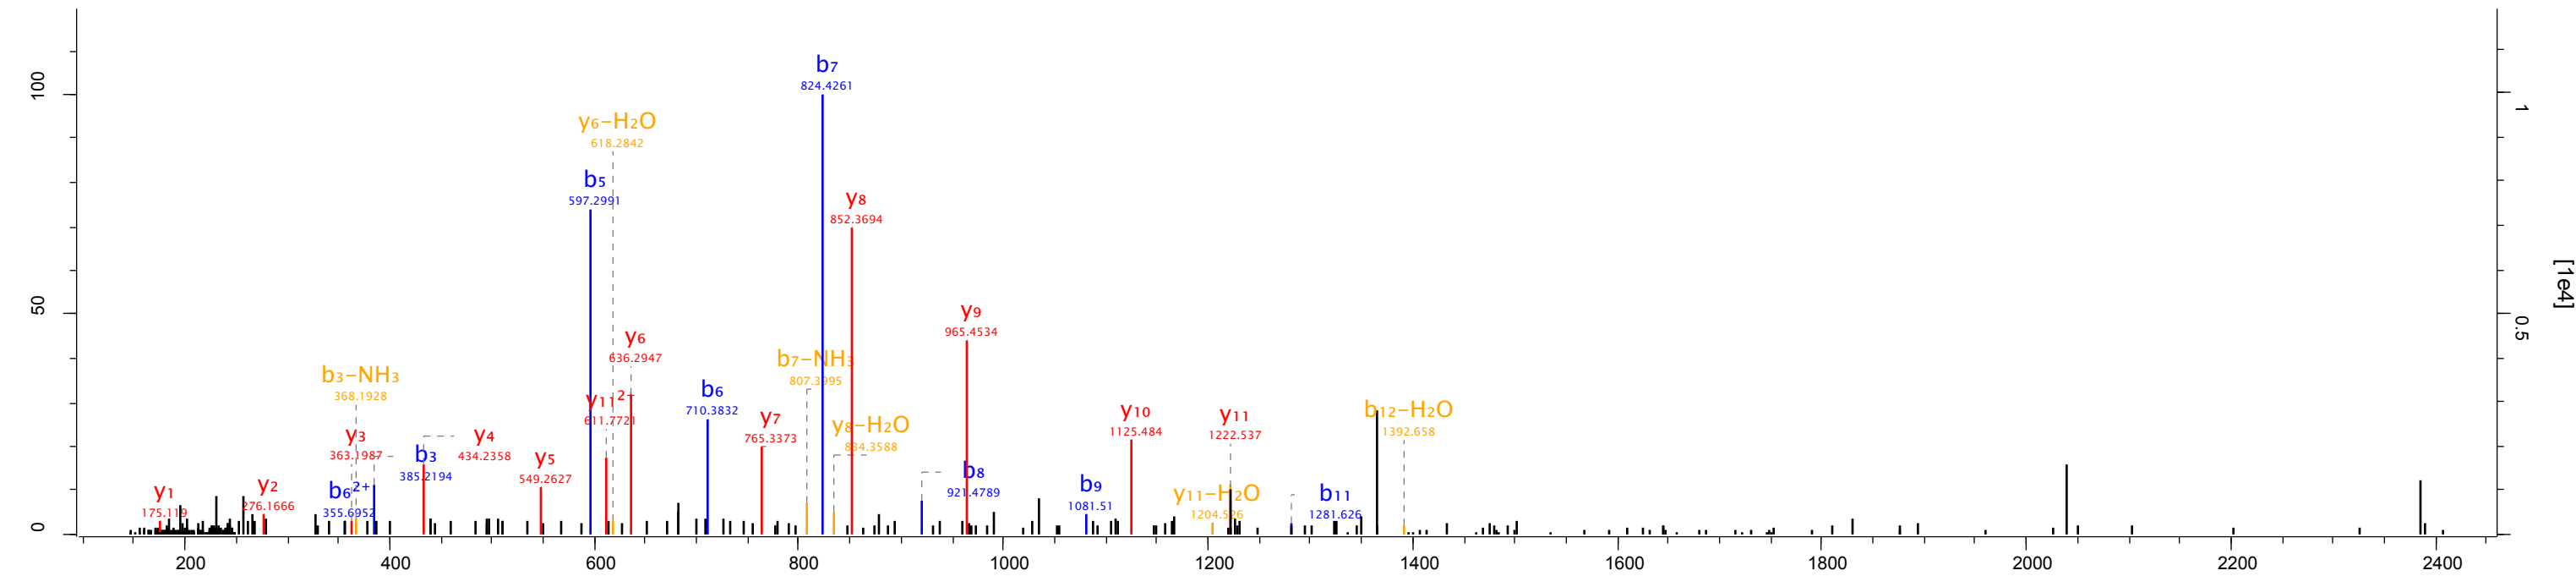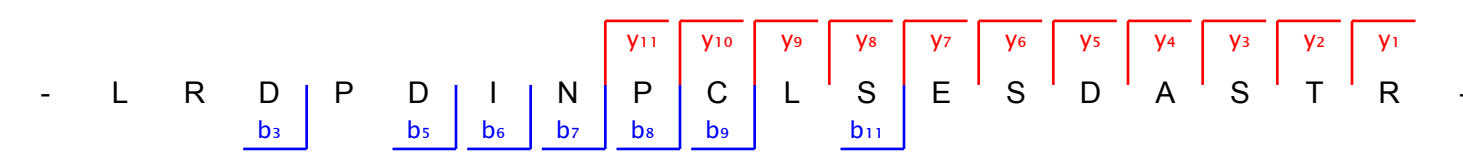

Raw file 20150307\_Hepa1\_Top\_opt\_D1\_01\_1671 Scan 40501 Method TOF; CID Score 82.48 m/z 891.08 Gene names Igfbp1

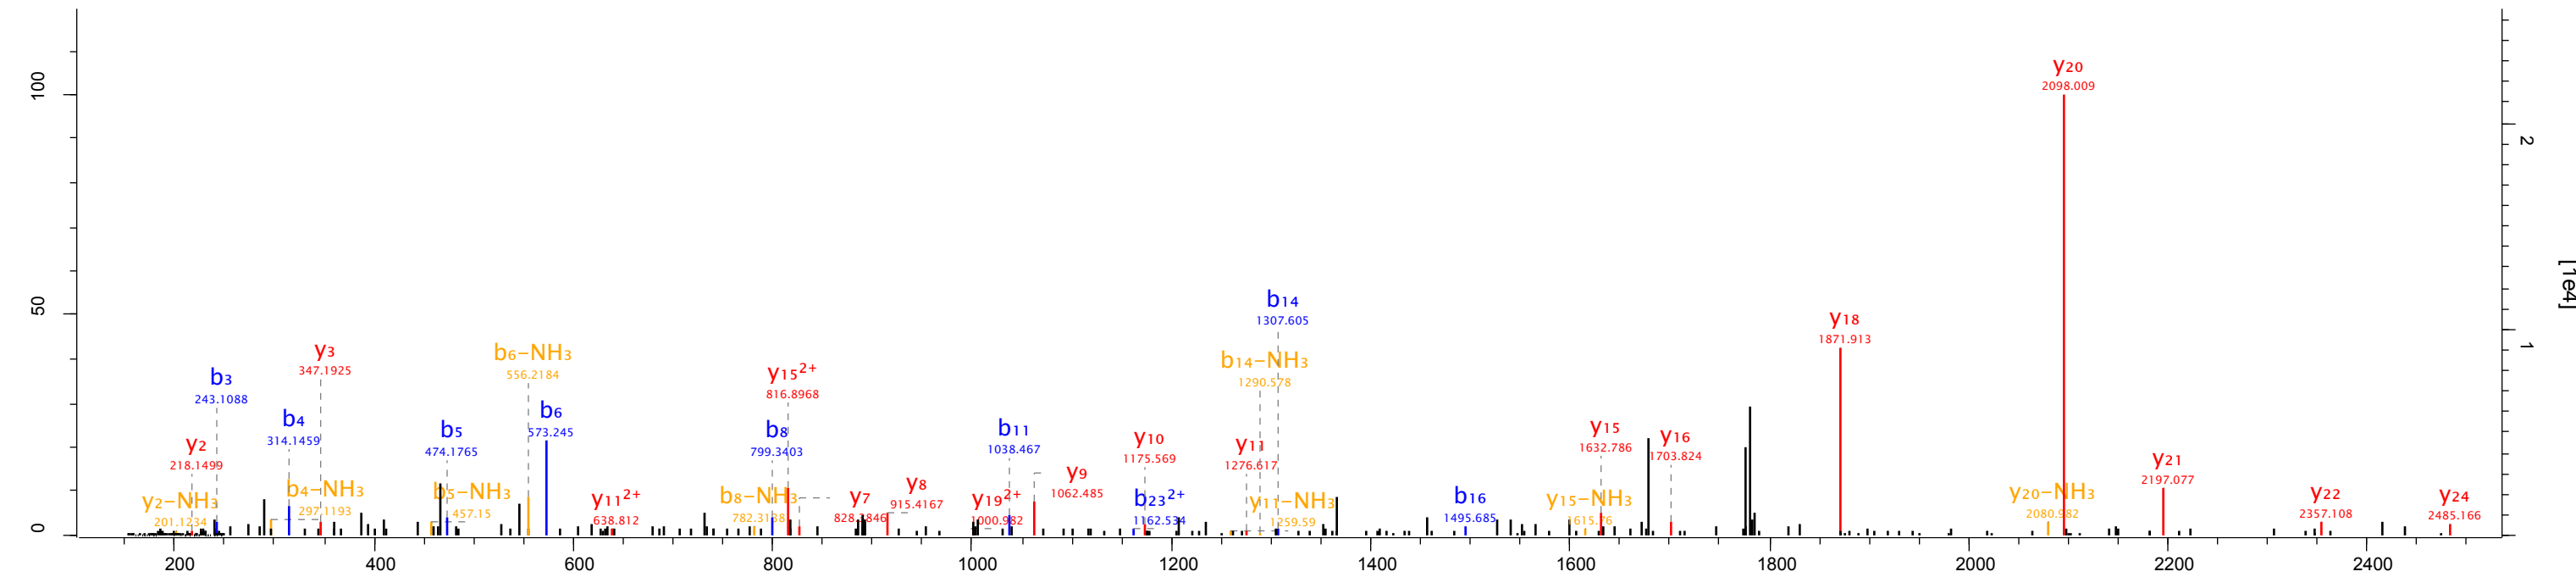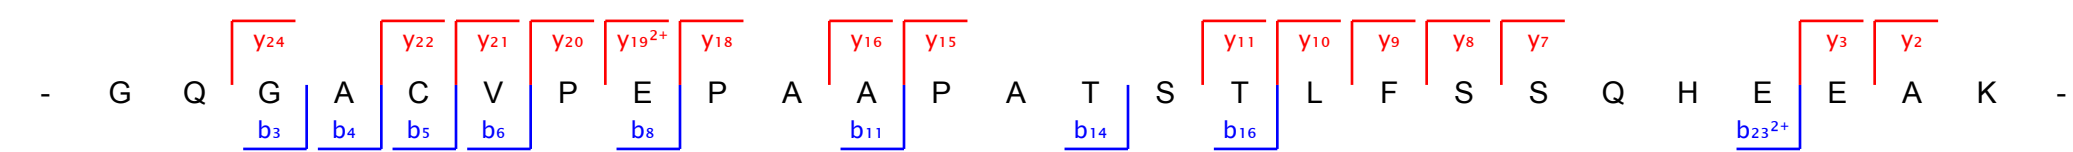

Raw file 20150307\_Hepa1\_Top\_opt\_D1\_01\_1671 Scan 45109 Method TOF; CID Score 62.69 m/z 638.33 Gene names Myd88

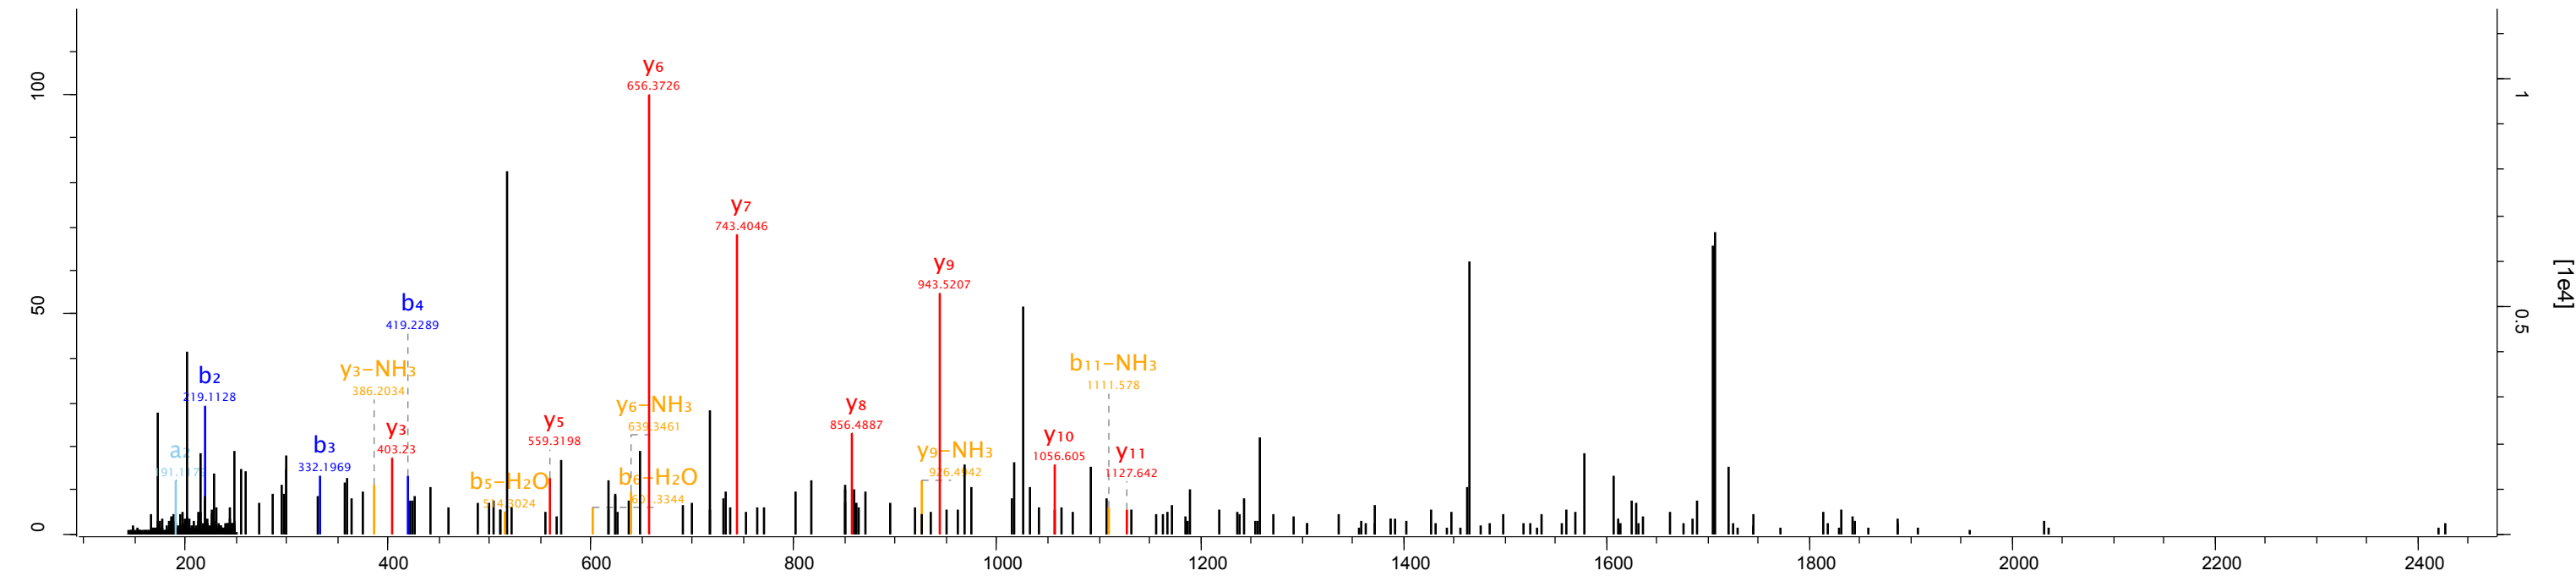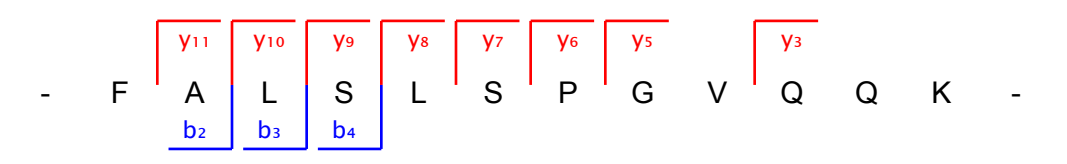

Raw file 20150307\_Hepa1\_Top\_opt\_D1\_01\_1671 Scan 46372 Method TOF; CID Score 150.22 m/z 881.4 Gene names Ly6e

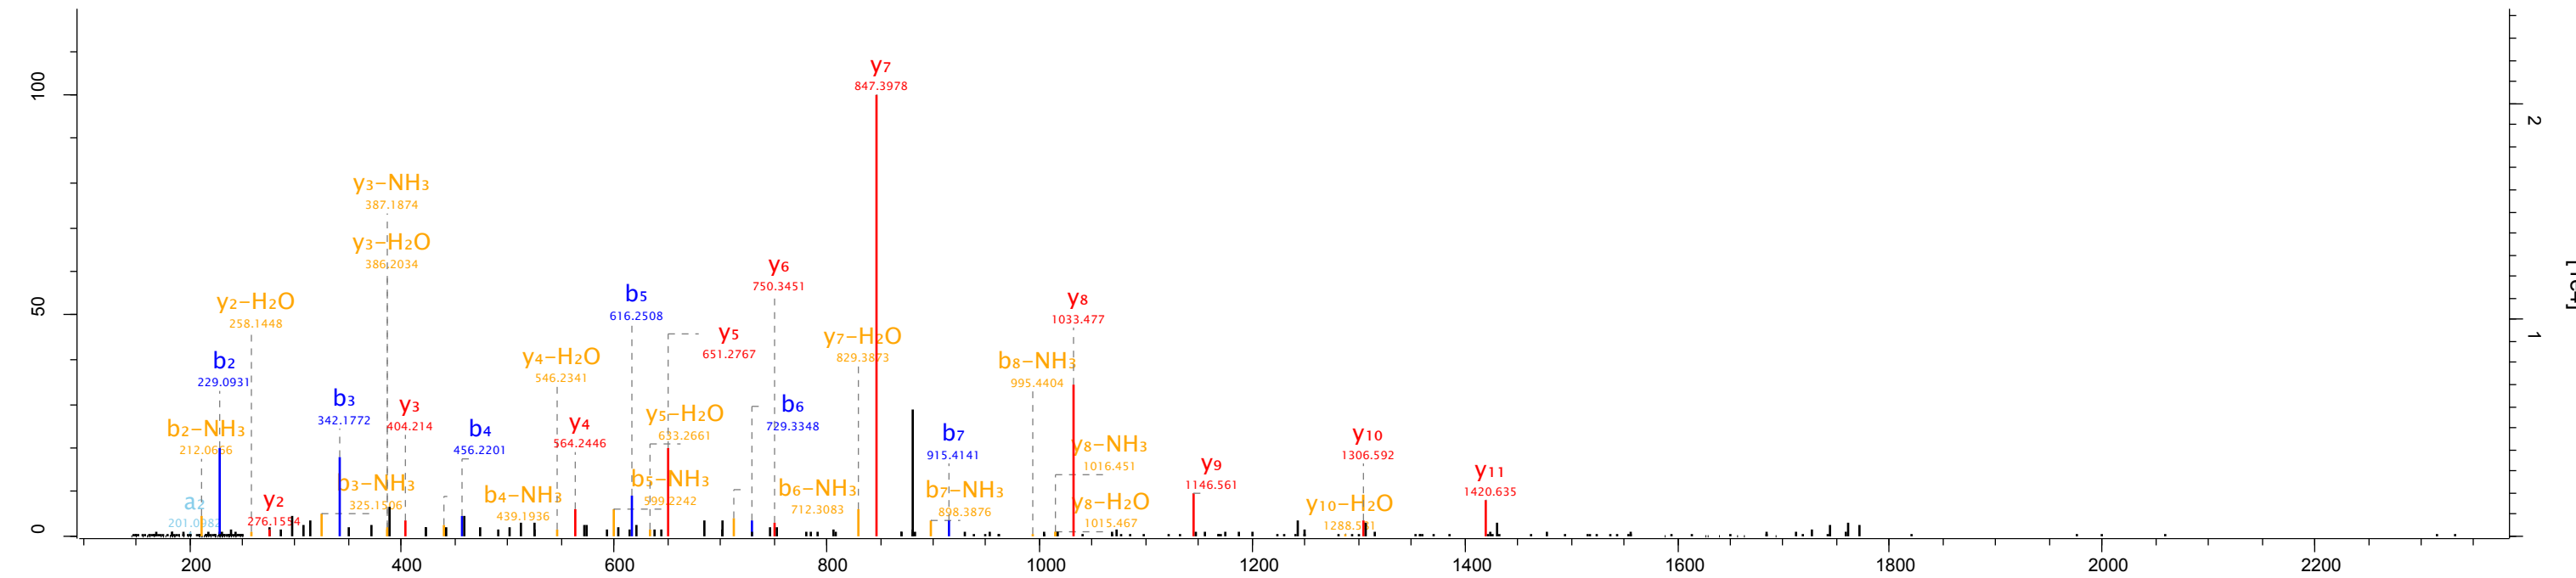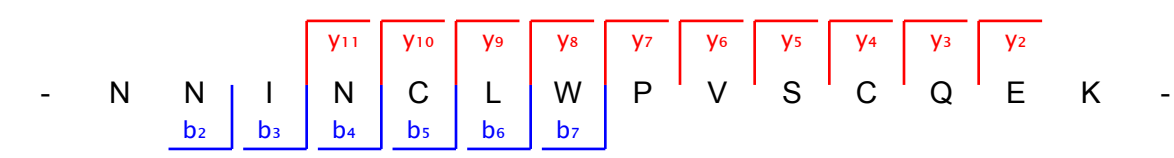

Raw file 20150307\_Hepa1\_Top\_opt\_D1\_01\_1671 Scan 47165 Method TOF; CID Score 50.3 m/z 619.31 Gene names Lgals3bp

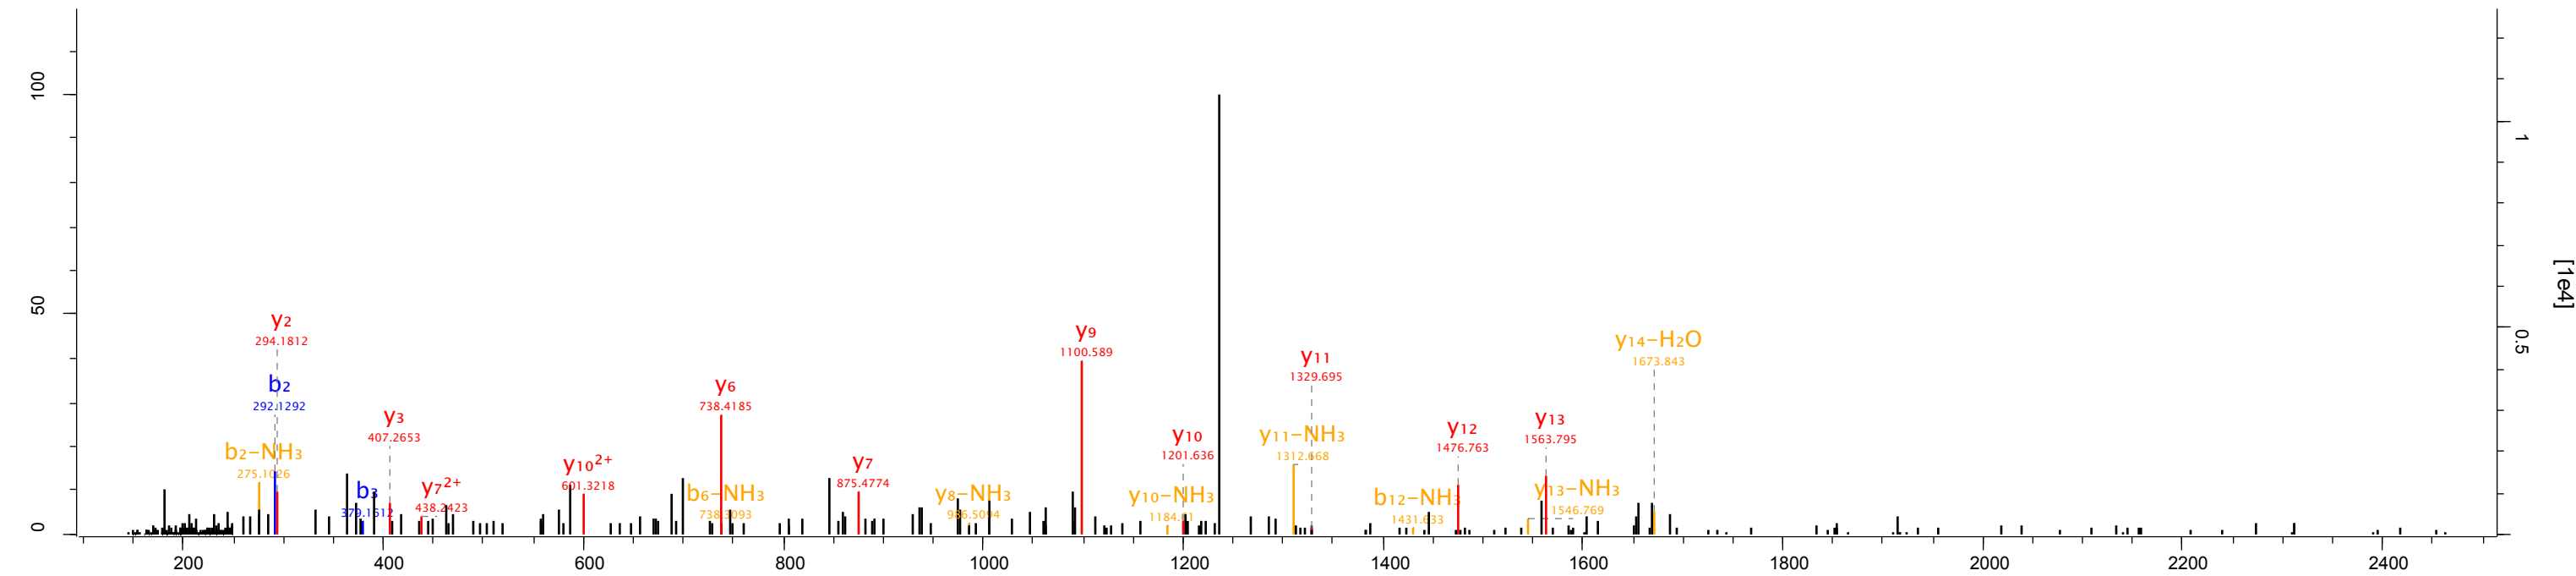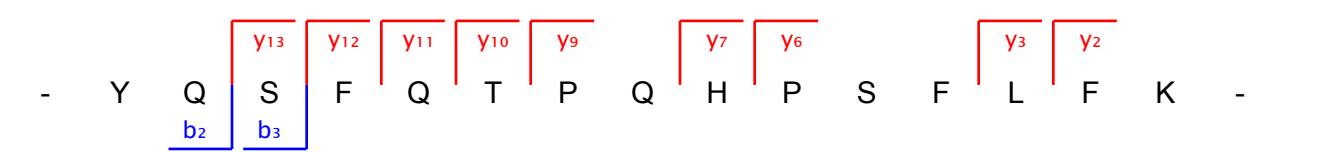

Raw file 20150307\_Hepa1\_Top\_opt\_D1\_01\_1671 Scan 50486 Method TOF; CID Score 45.21 m/z 559.6 Gene names Asb7

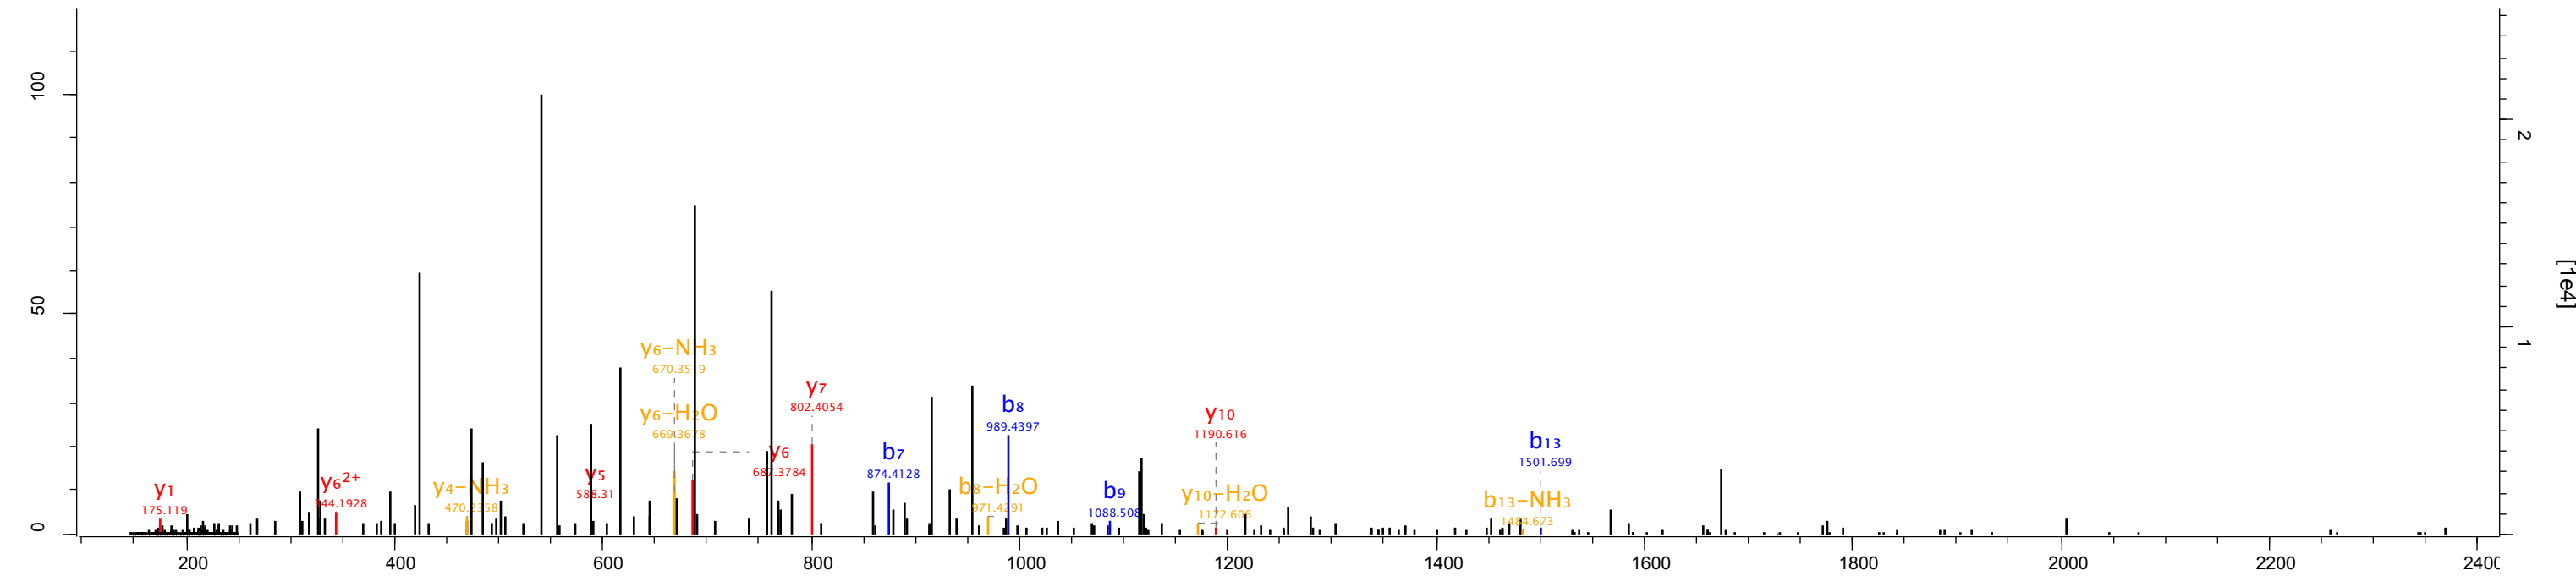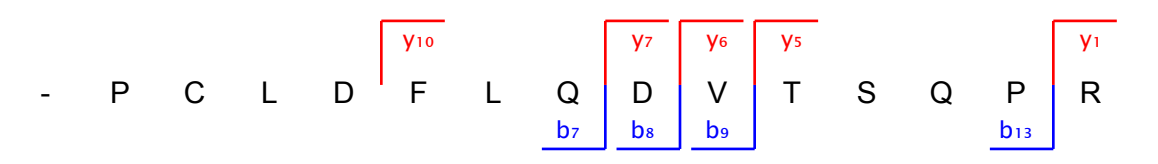

Raw file Scan Method Score m/z Gene names  
 20150307\_Hepa1\_Top\_opt\_D1\_01\_1671 58244 TOF; CID 76.3 781.37 Stc1

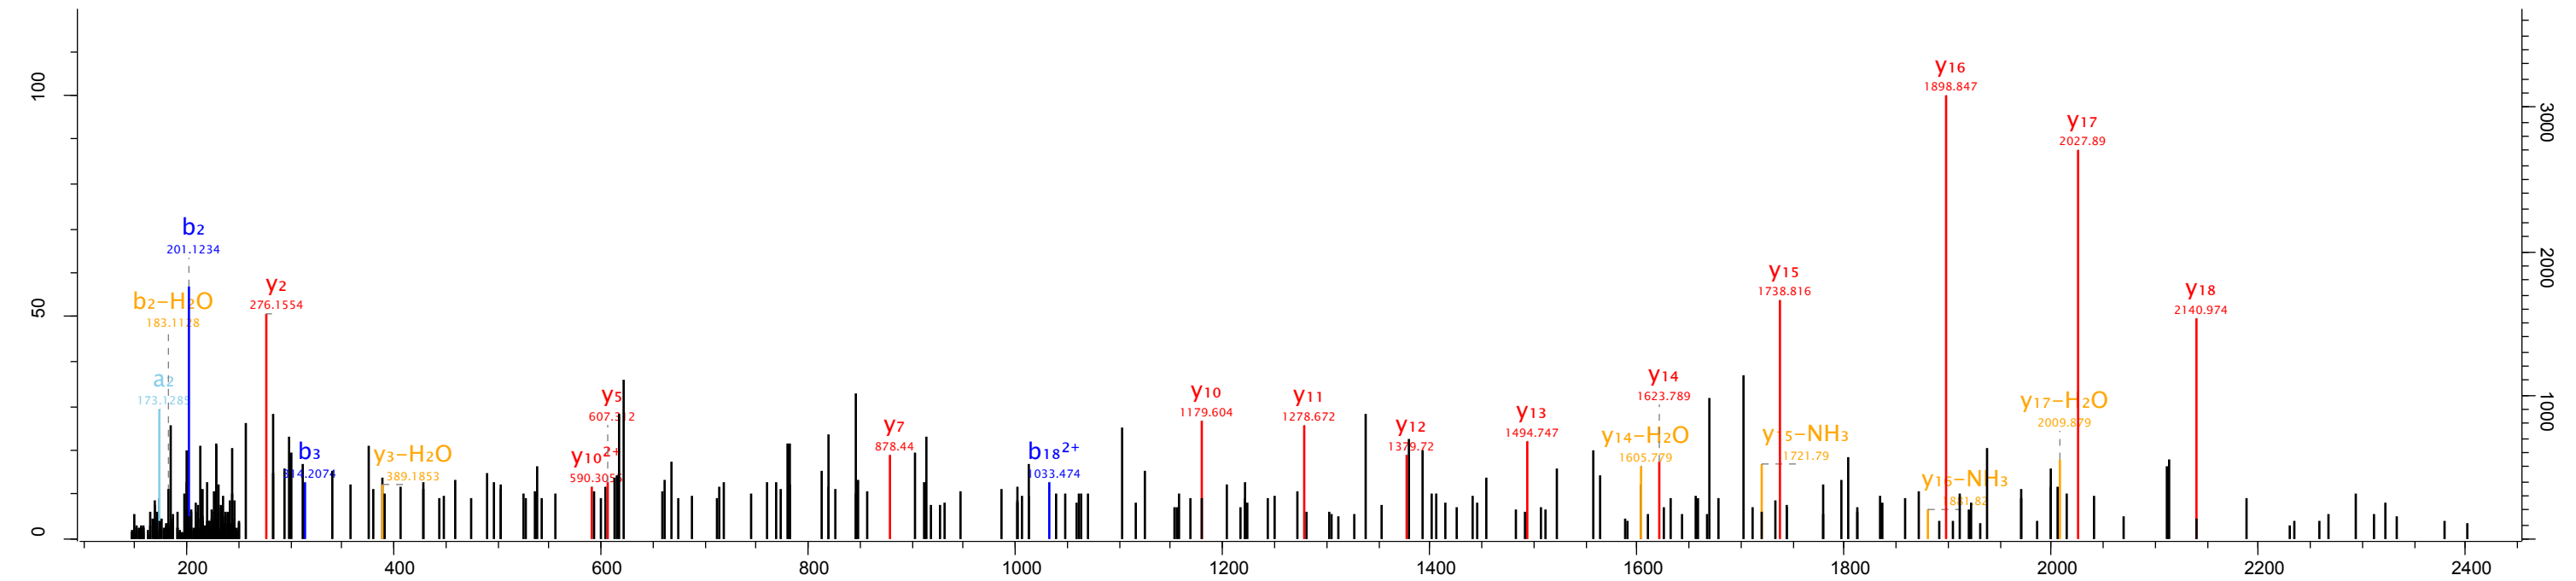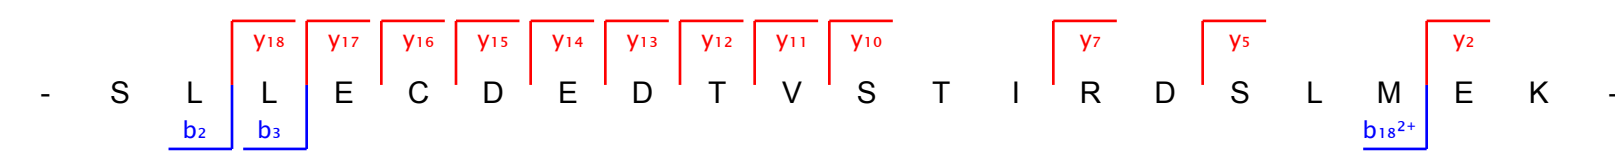



Raw file 20150307\_Hepa1\_Top\_opt\_D1\_01\_1671 Scan 69497 Method TOF; CID Score 91.4 m/z 698.38 Gene names Scoc

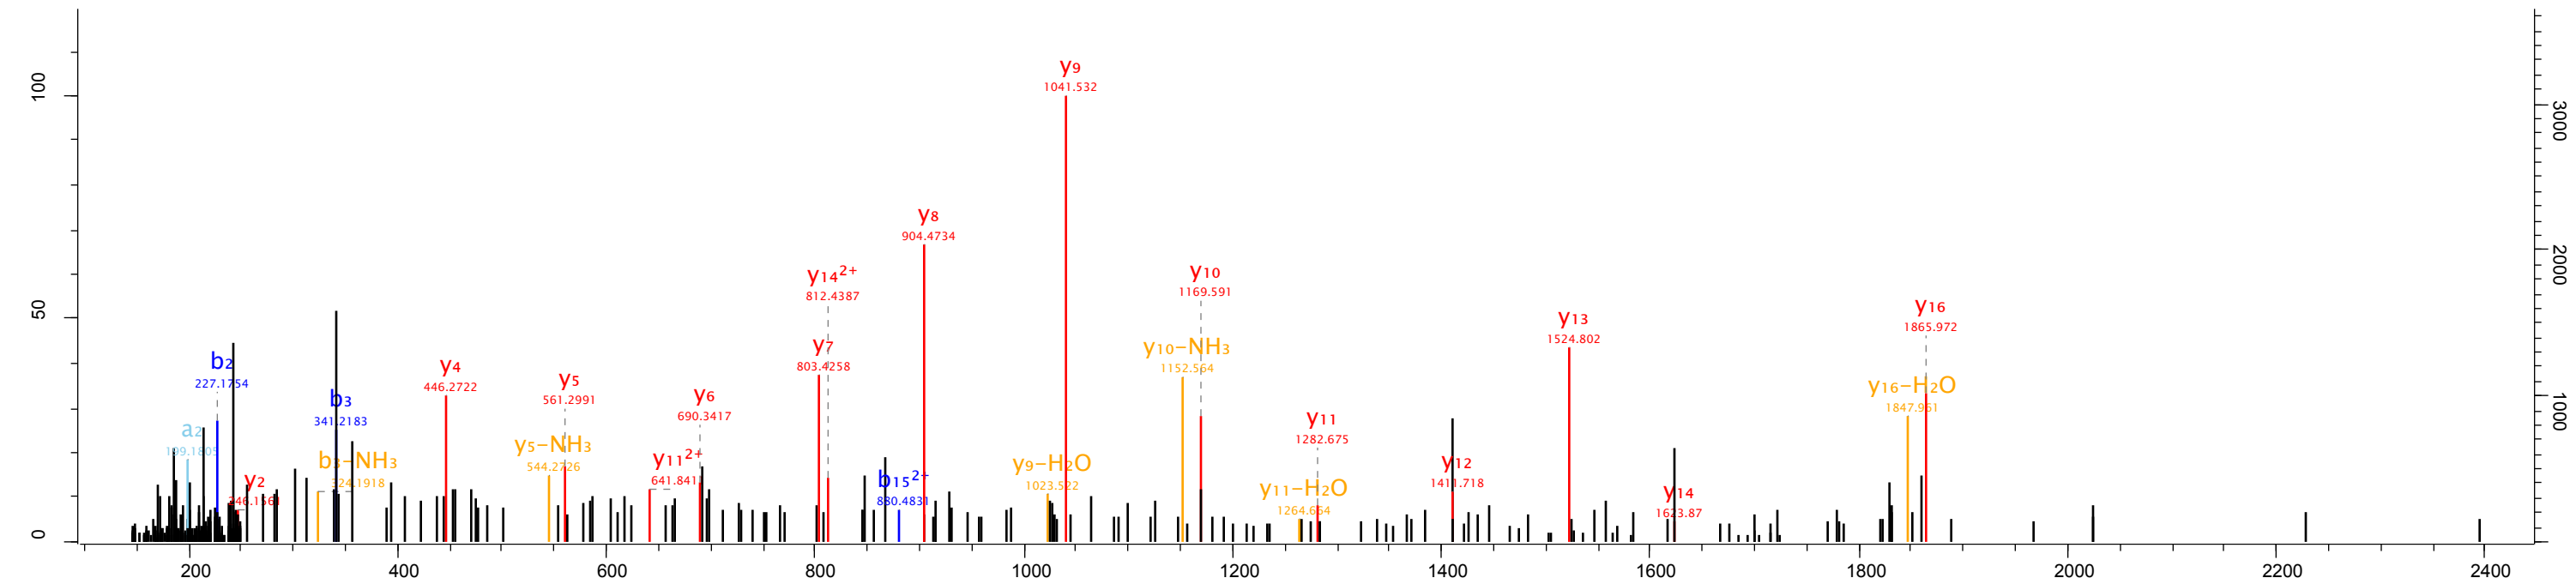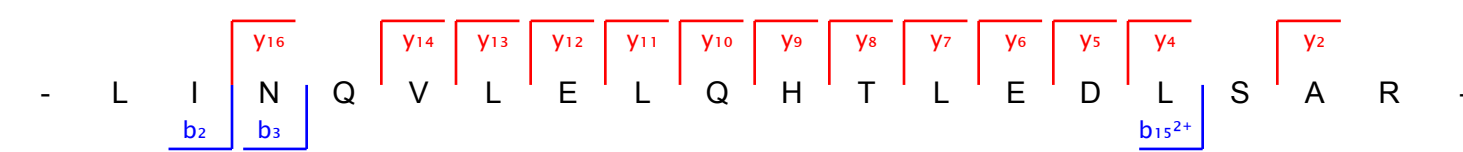

Raw file  
20150307\_Hepa1\_Top\_opt\_D1\_01\_1683

Scan Method Score m/z Gene names  
5405 TOF; CID 72.32 825.37 Papd5

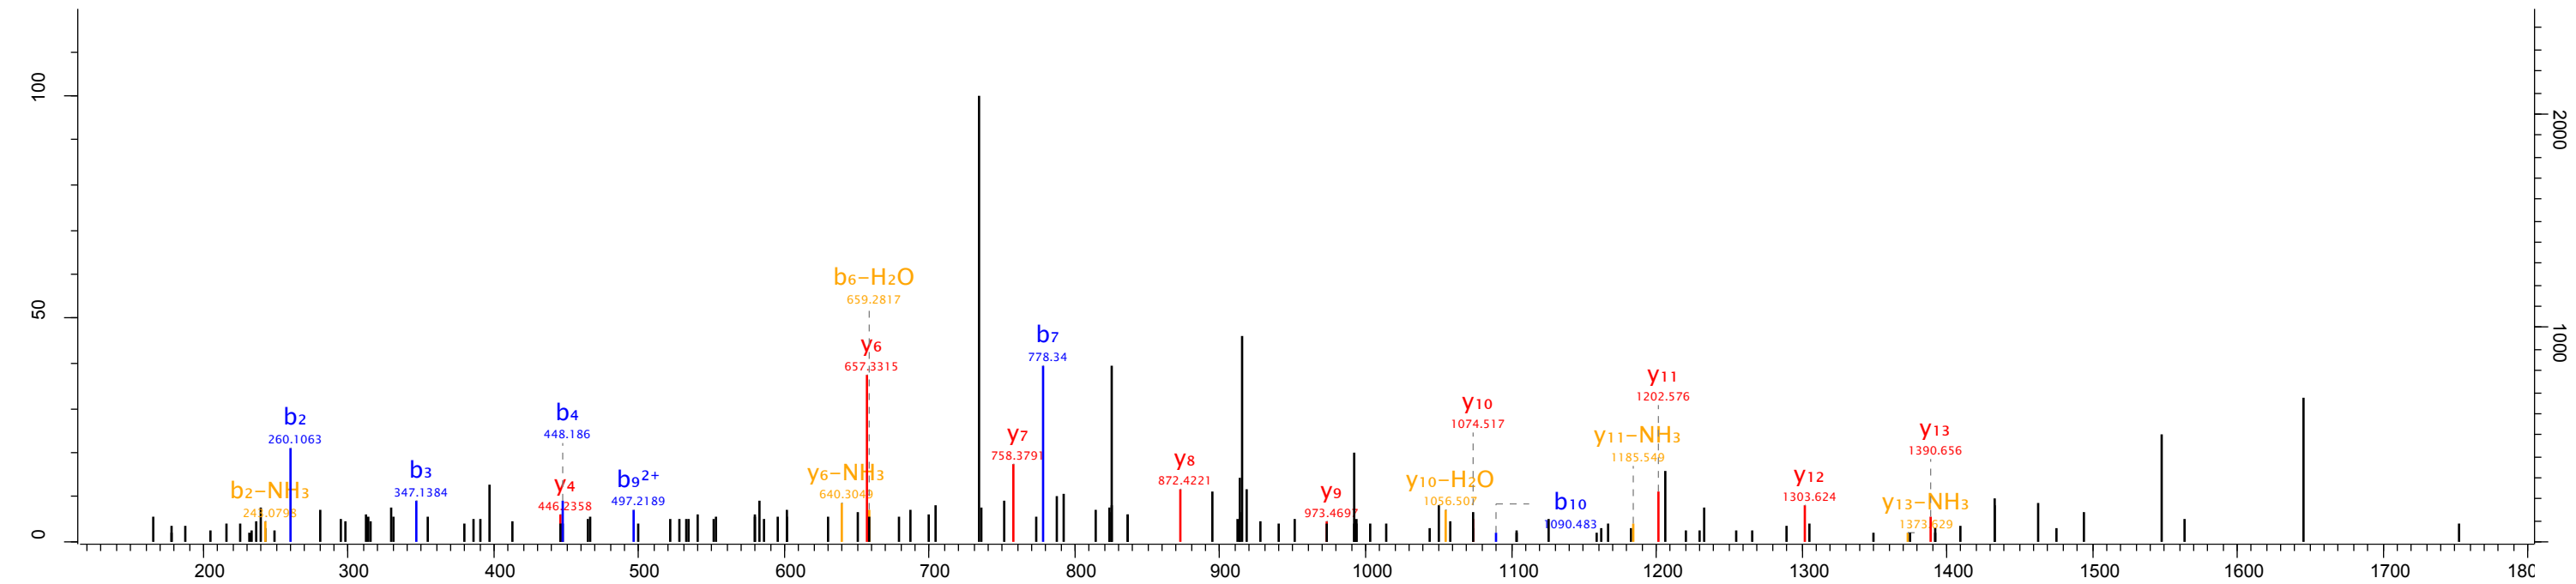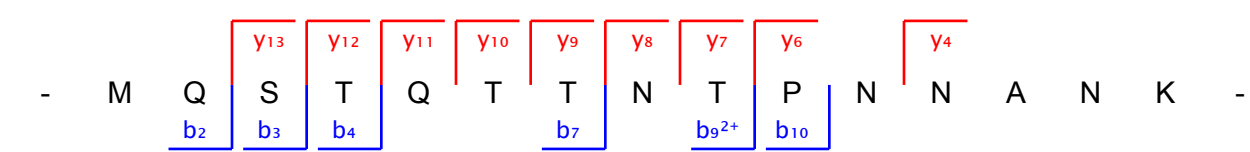

Raw file  
20150307\_Hepa1\_Top\_opt\_D1\_01\_1683

Scan 8227 Method TOF; CID Score 54.25 m/z 565.6 Gene names Fam76b

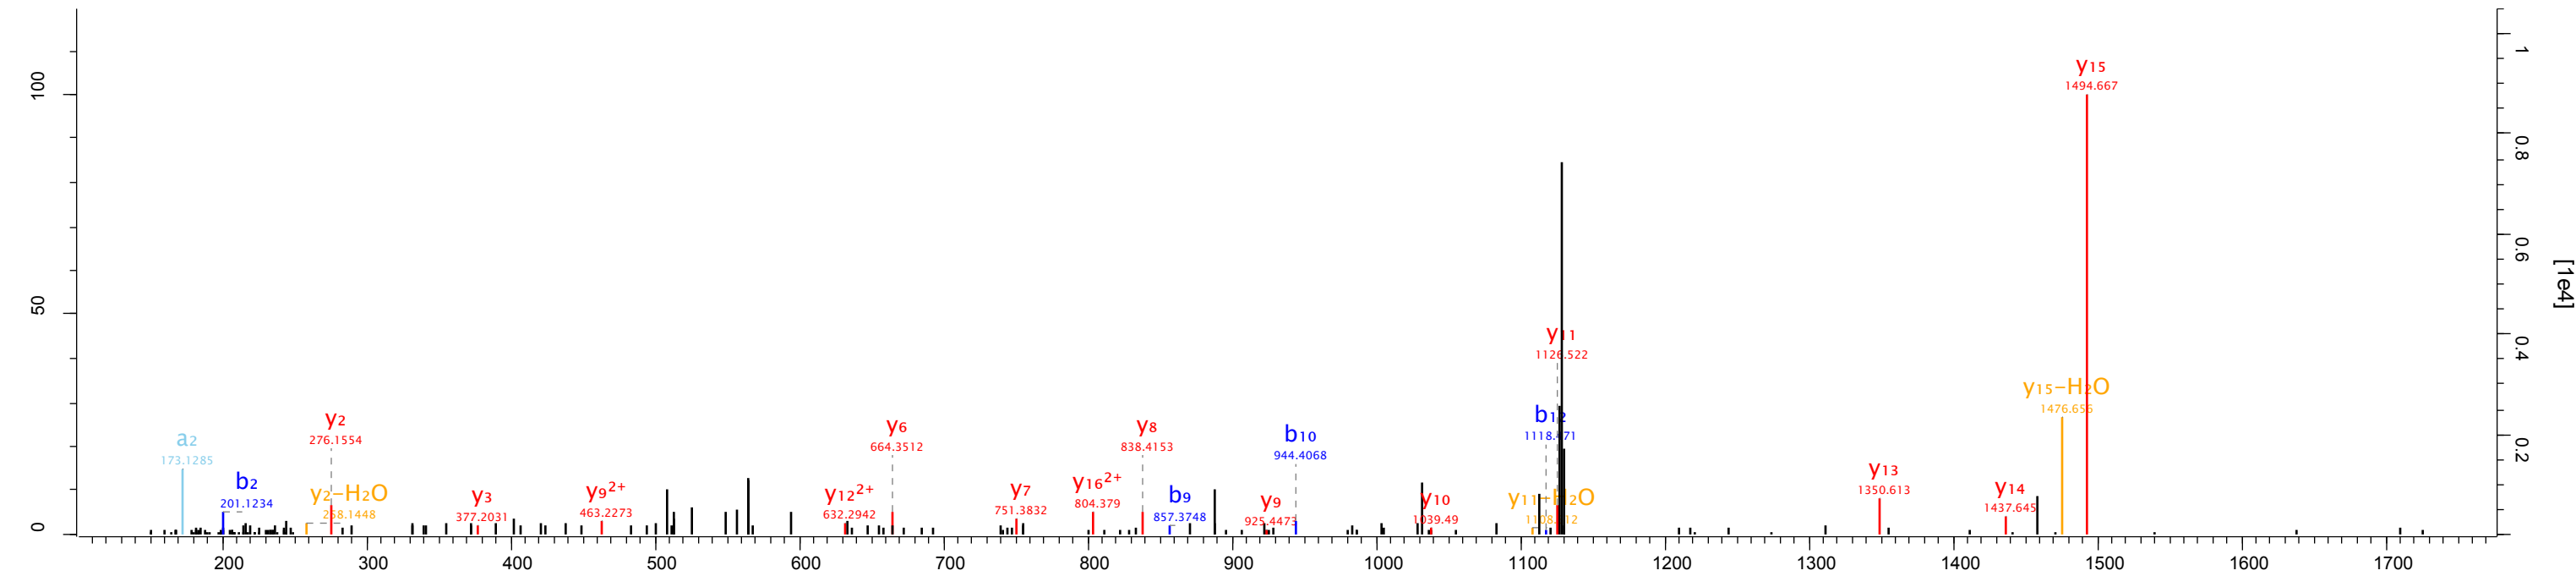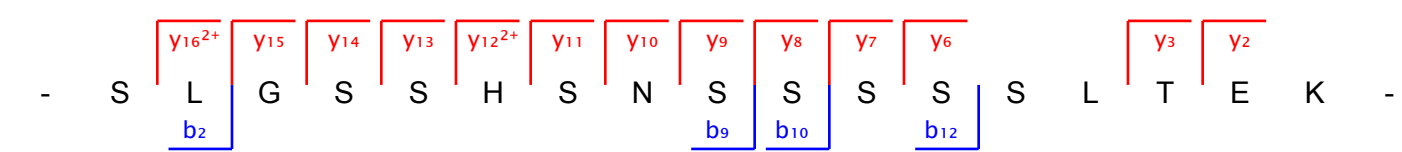

Raw file 20150307\_Hepa1\_Top\_opt\_D1\_01\_1683 Scan 13304 Method TOF; CID Score 73.44 m/z 625.26 Gene names Coa6

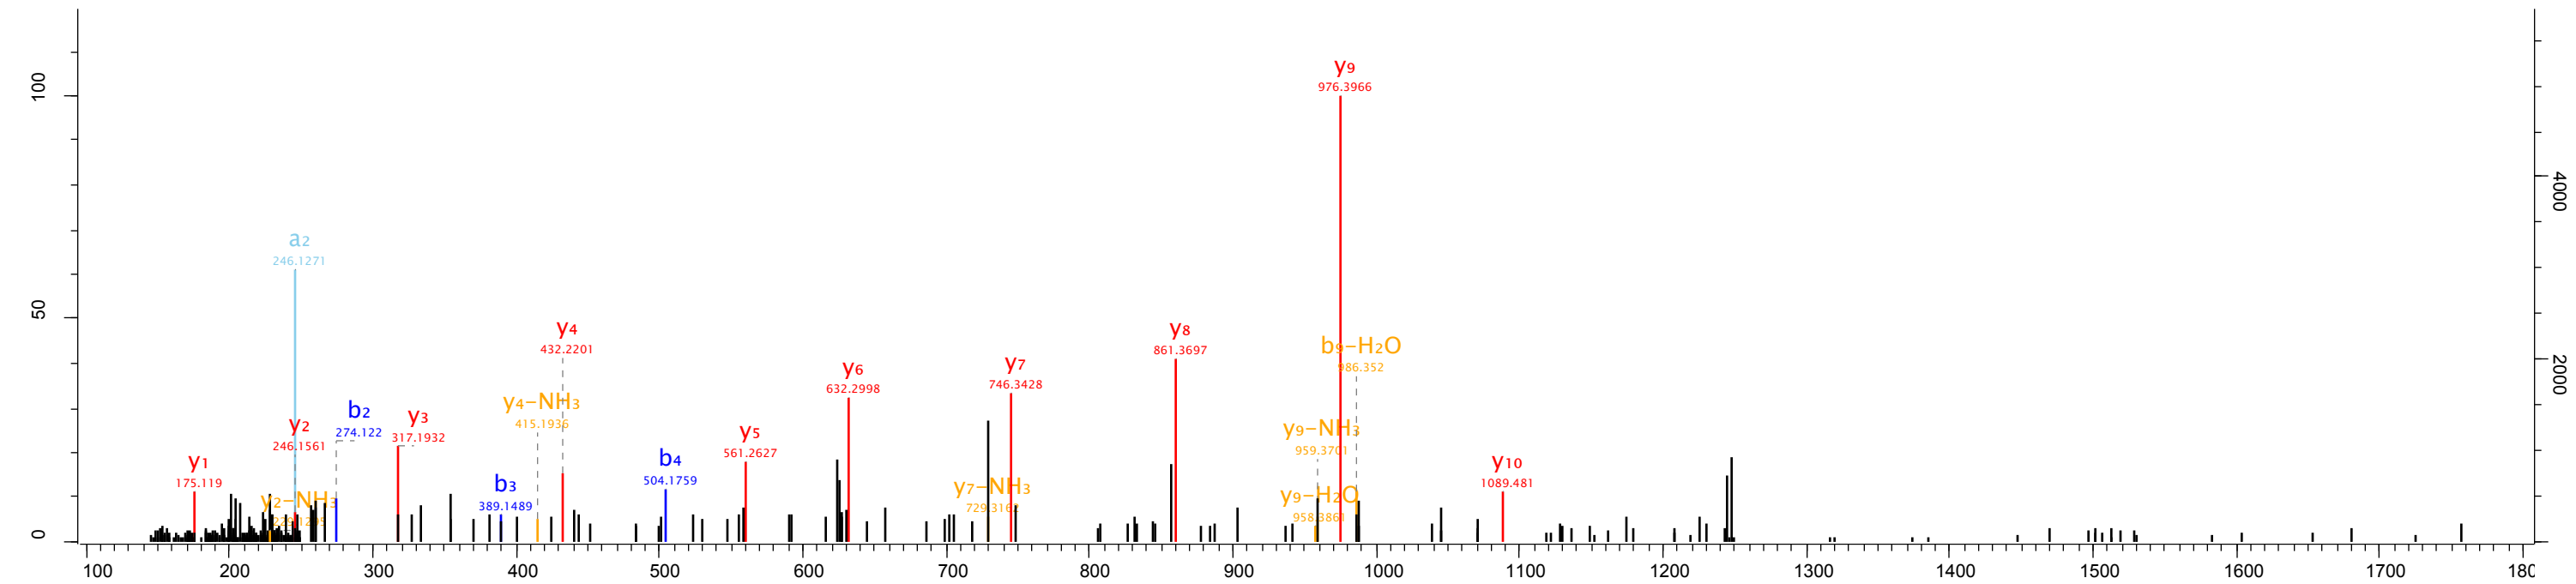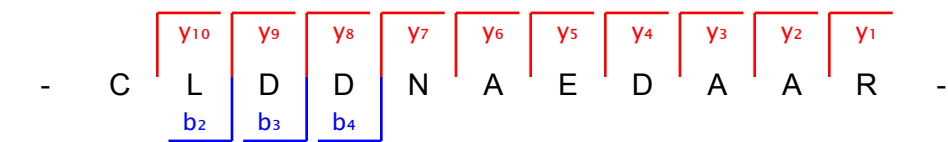

Raw file 20150307\_Hepa1\_Top\_opt\_D1\_01\_1683 Scan 22974 Method TOF; CID Score 54.34 m/z 635.32 Gene names Dnajb2

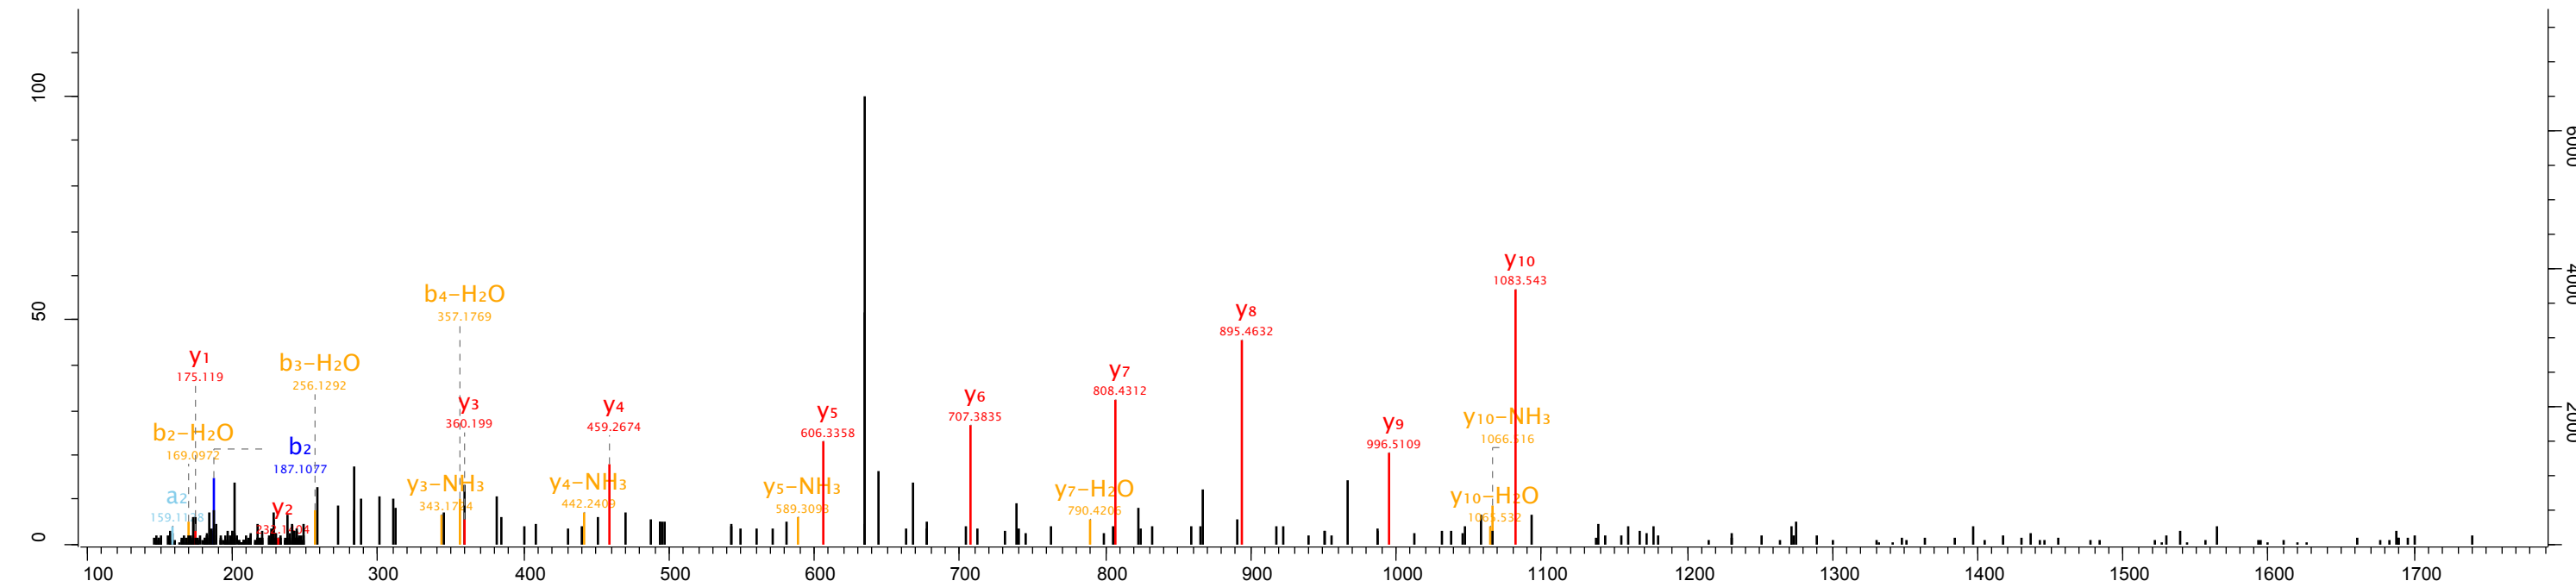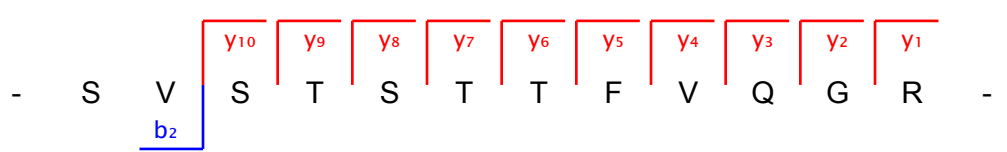

Raw file: 20150307\_Hepa1\_Top\_opt\_D1\_01\_1683  
 Scan: 31253 Method: TOF; CID Score: 77.28 m/z: 705.33 Gene names: Vkorc1

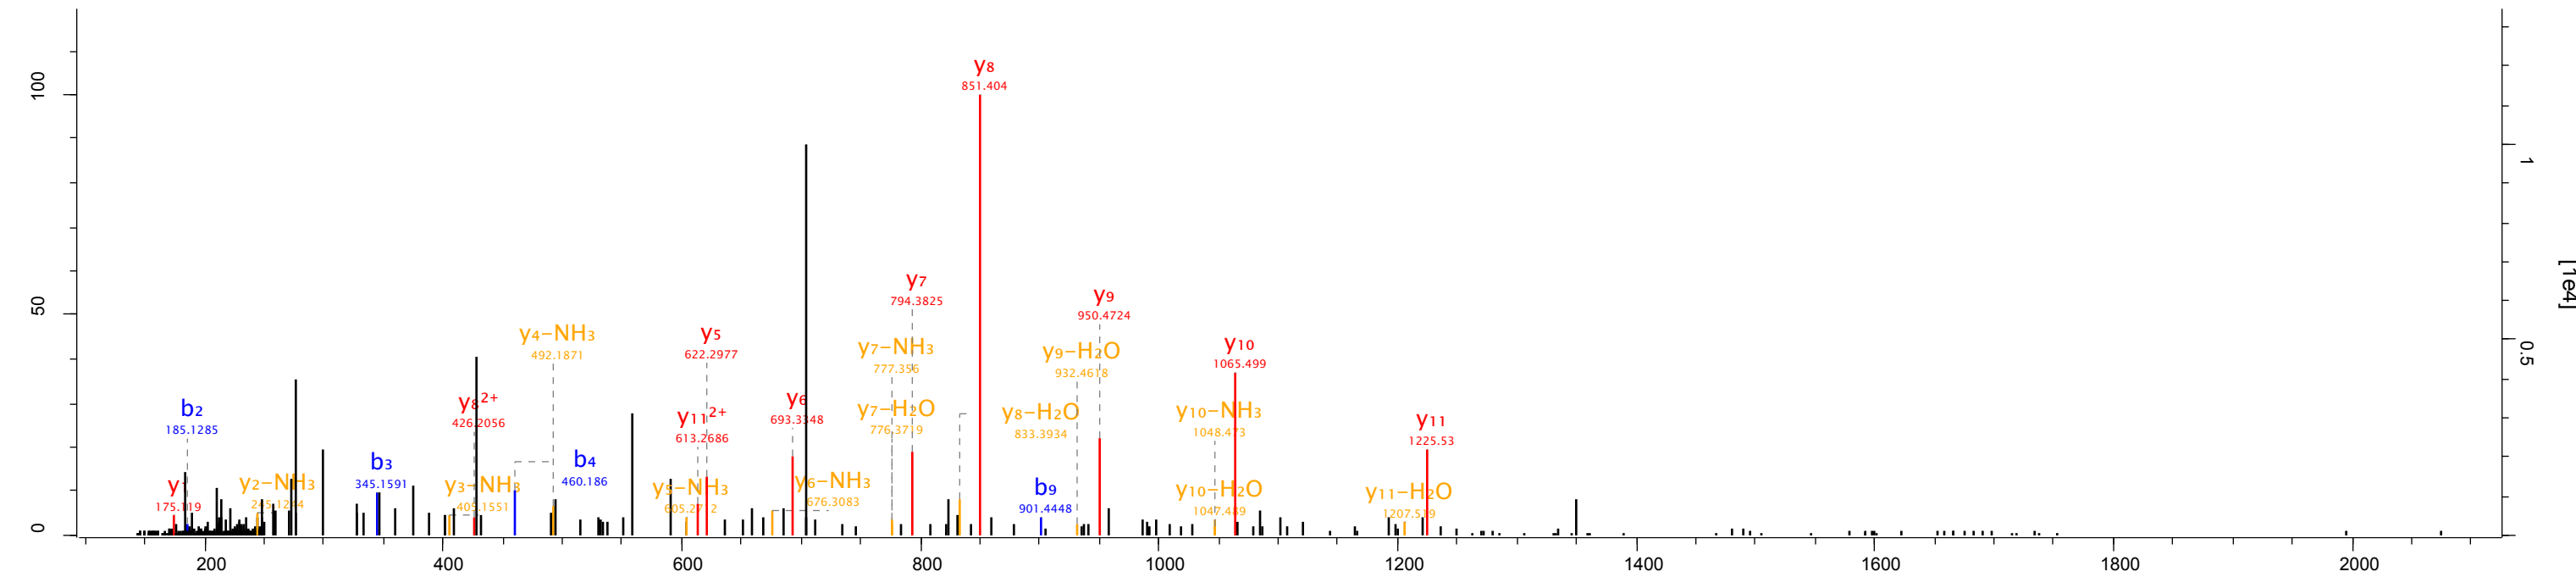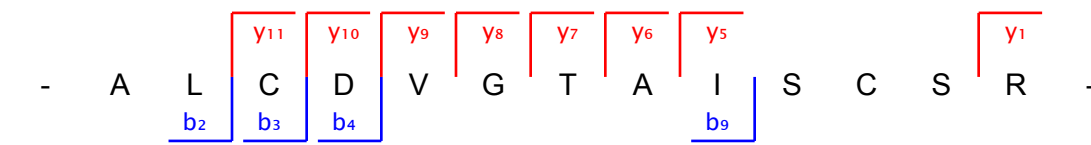

Raw file: 20150307\_Hepa1\_Top\_opt\_D1\_01\_1683  
 Scan: 35469 Method: TOF; CID Score: 161.11 m/z: 476.24 Gene names: Mapk15

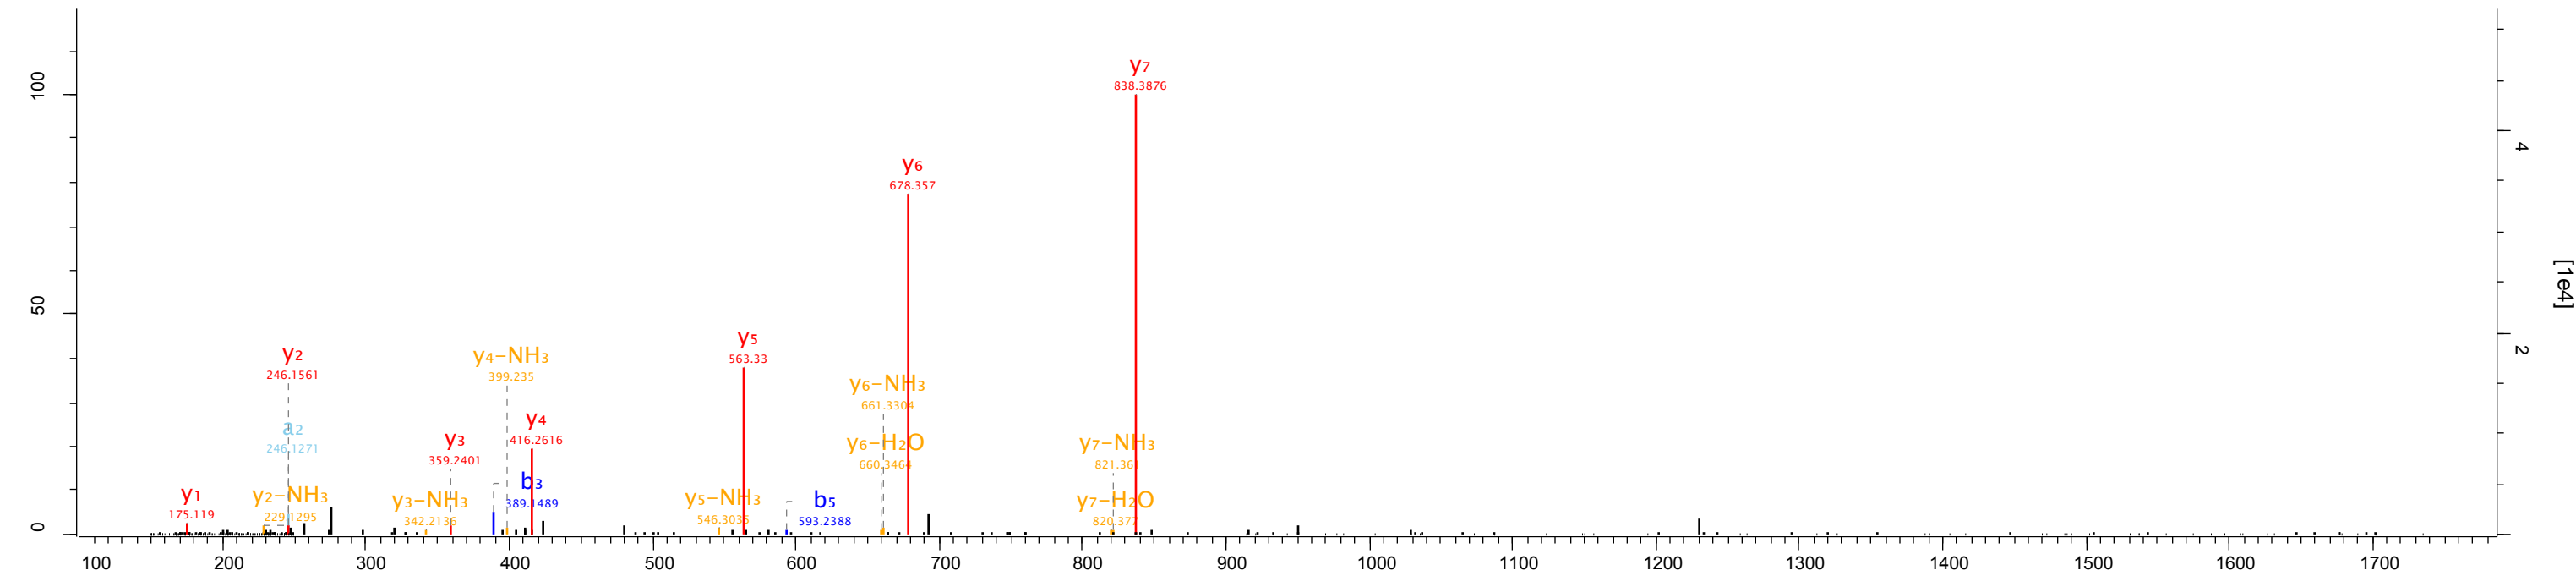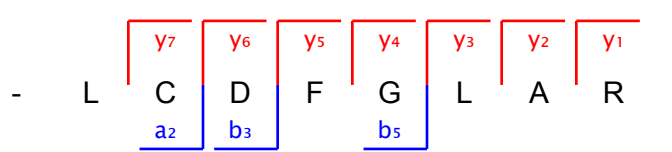

Raw file 20150307\_Hepa1\_Top\_opt\_D1\_01\_1683 Scan 46496 Method TOF; CID Score 75.68 m/z 1052.49 Gene names Lifr

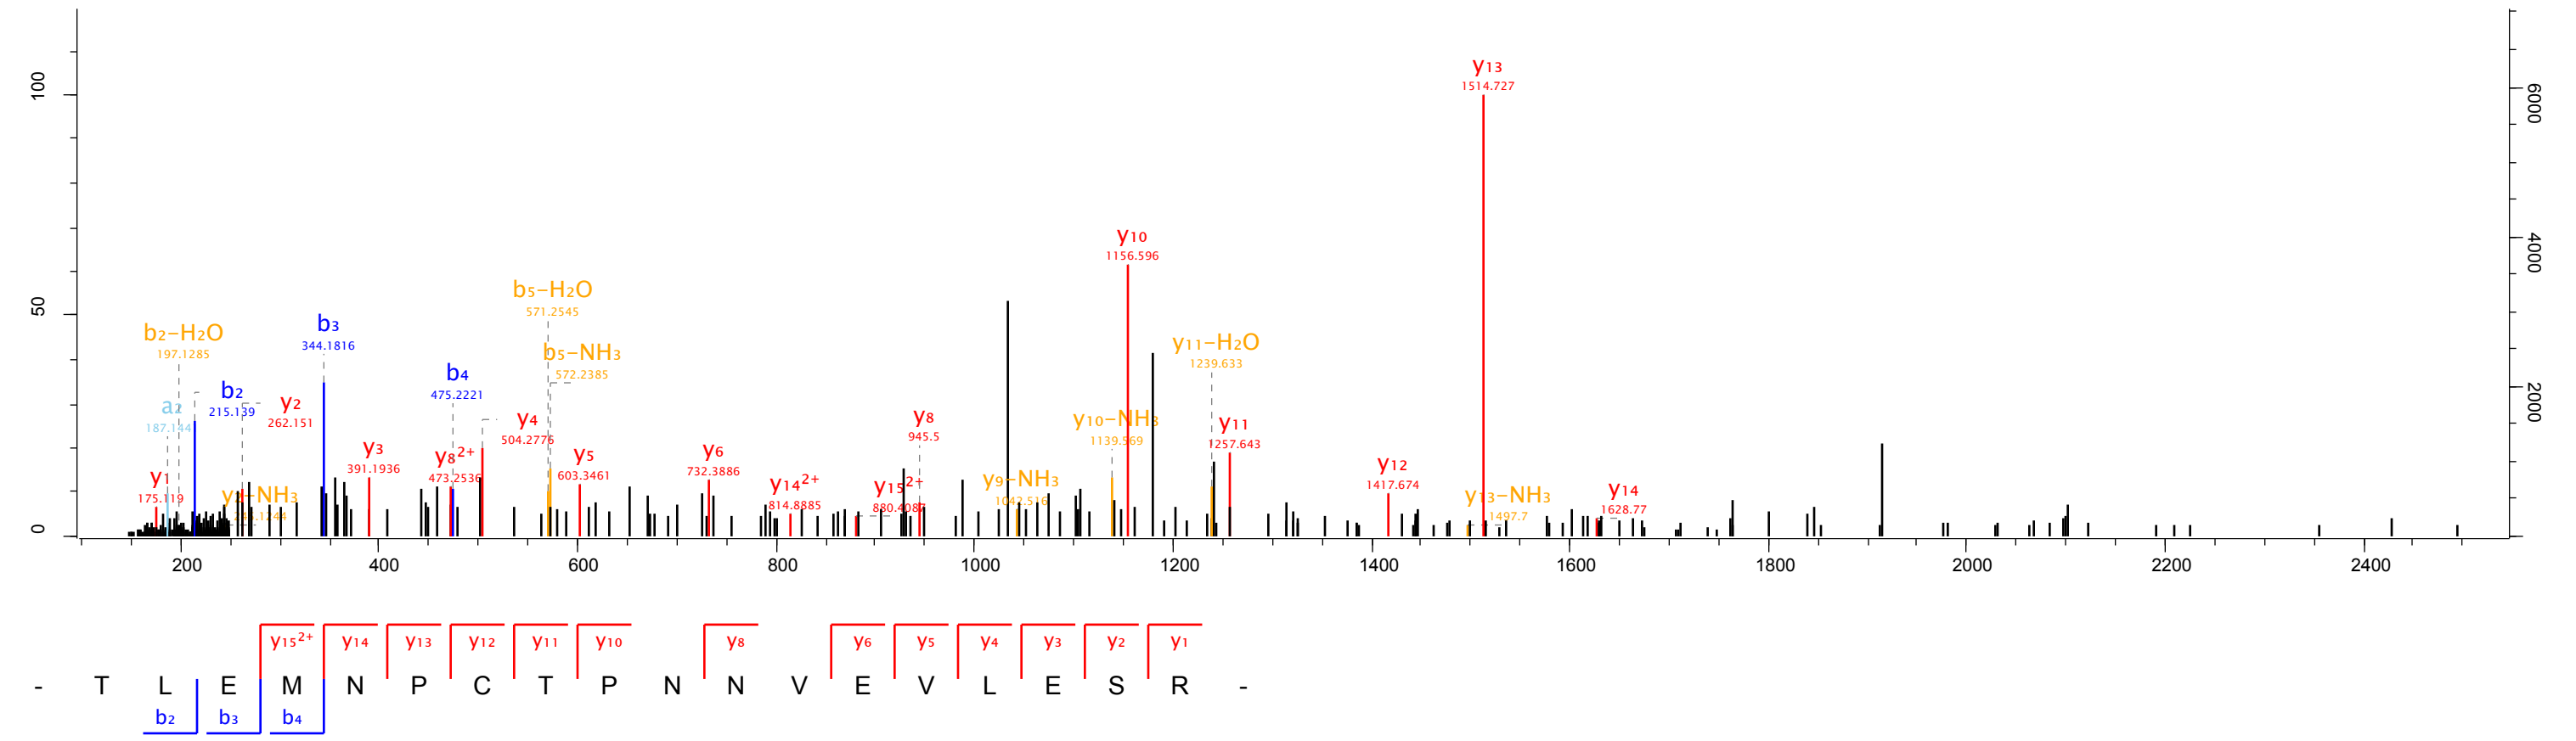



Raw file  
20150307\_Hepa1\_Top\_opt\_D1\_01\_1683

Scan 47202 Method TOF; CID Score 84.75 m/z 782.41 Gene names N6amt1

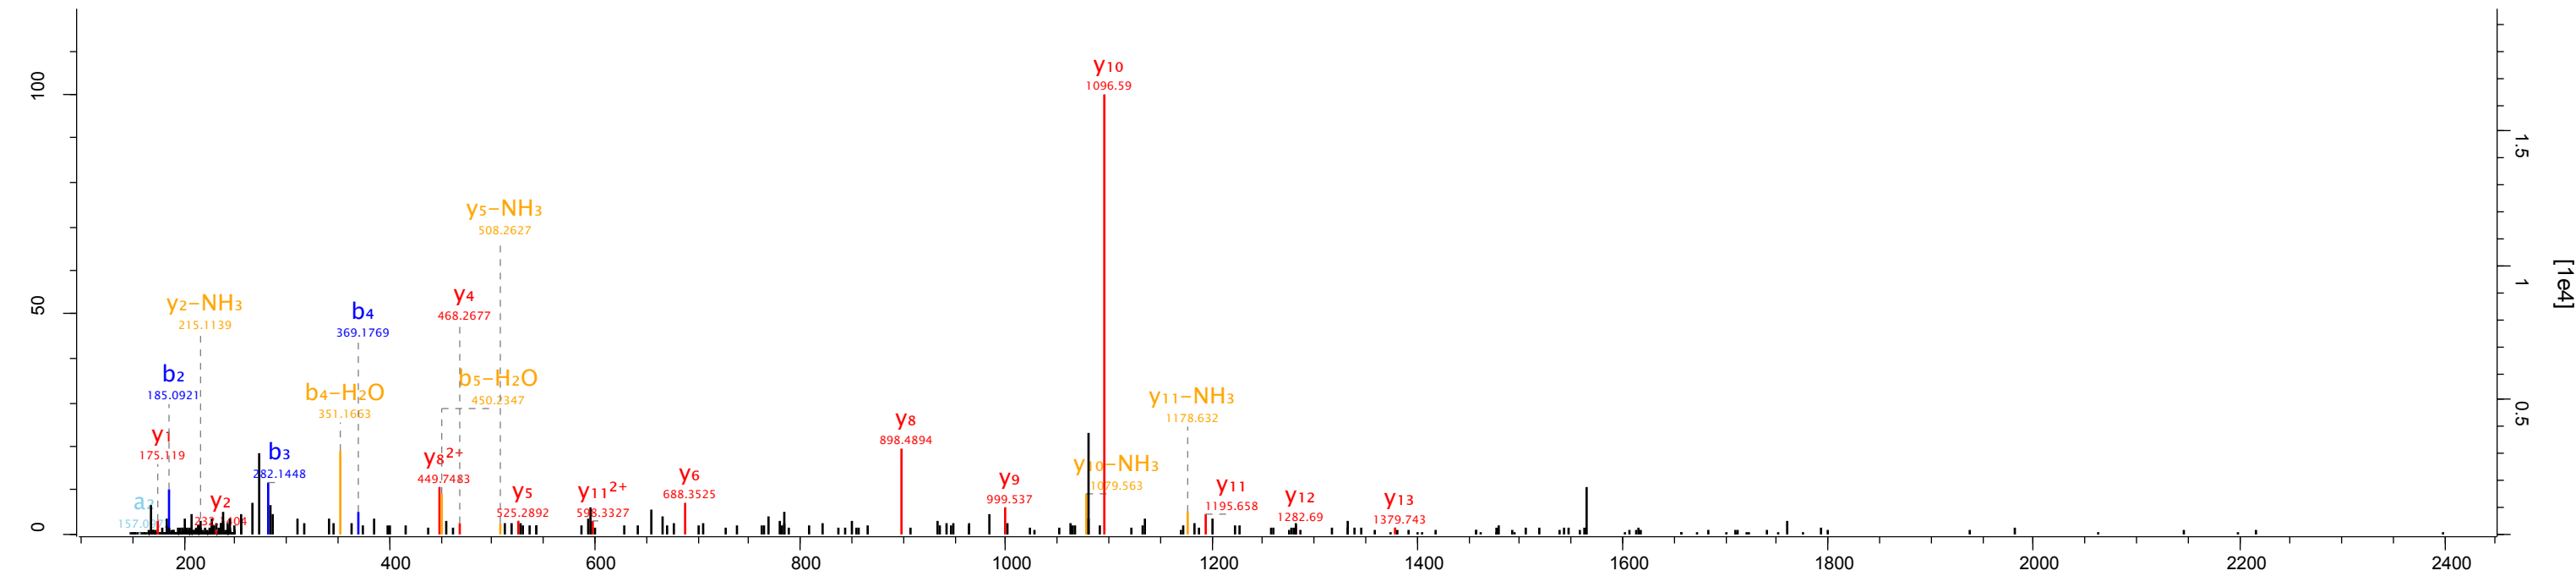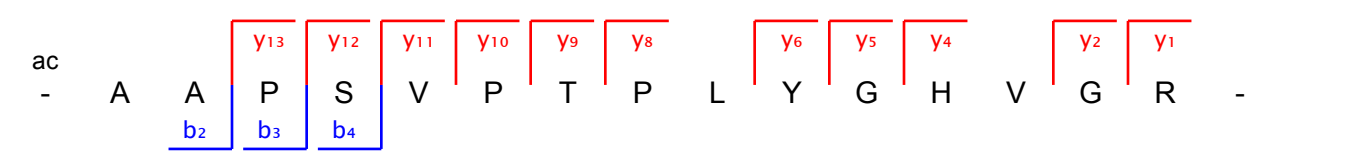

Raw file 20150307\_Hepa1\_Top\_opt\_D1\_01\_1683 Scan 54707 Method TOF; CID Score 120.7 m/z 594.33 Gene names Mboat7

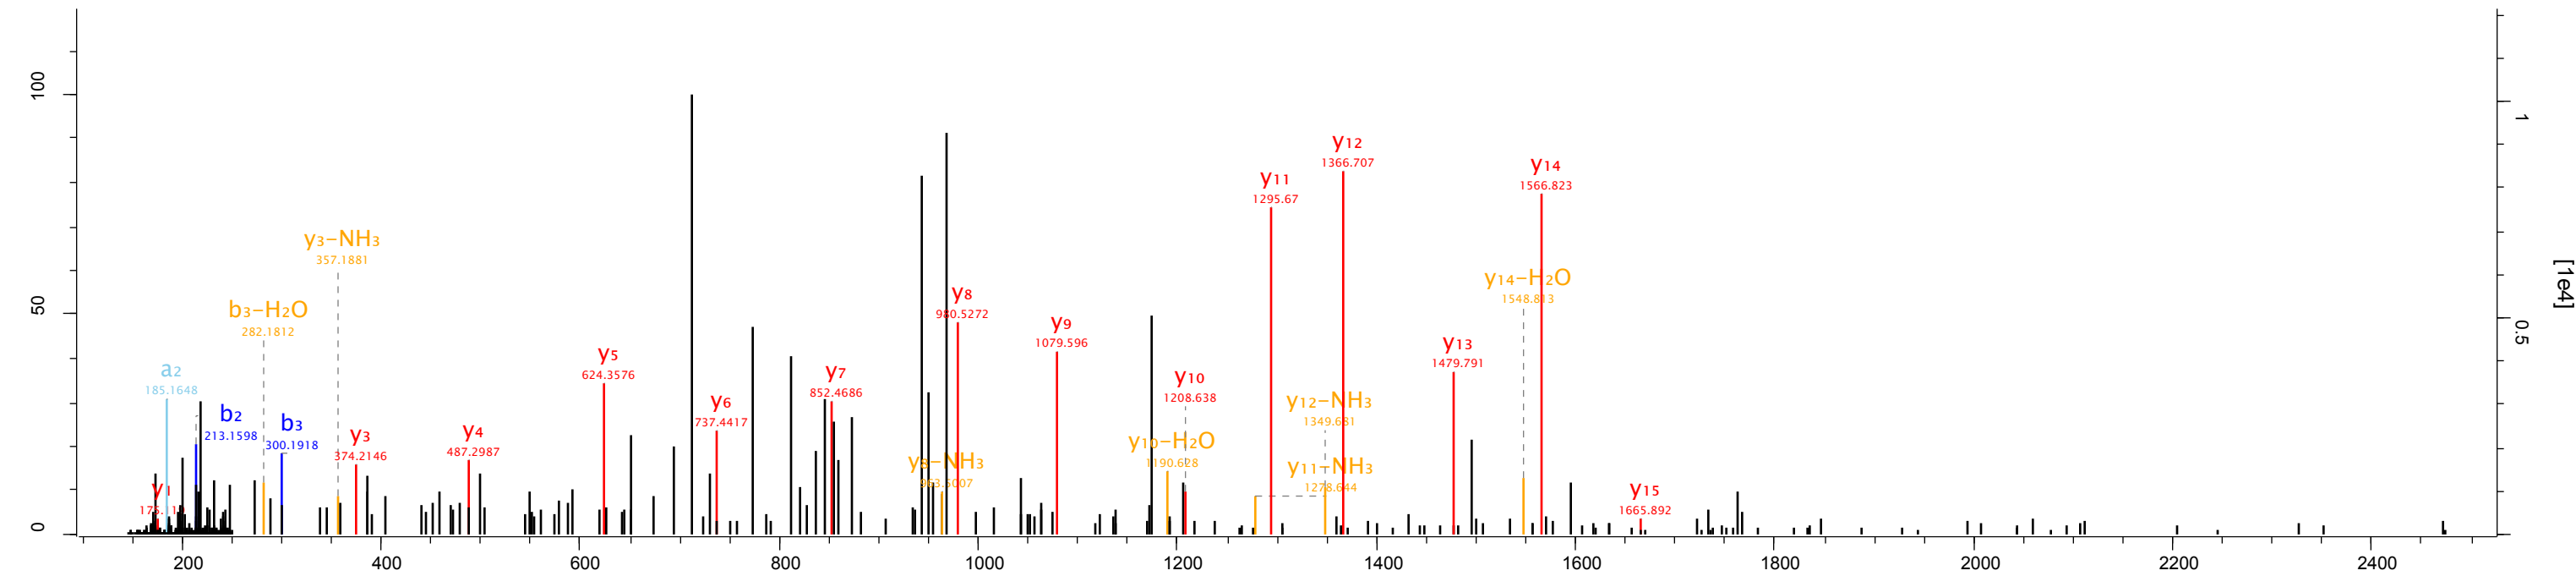

- L V S L A S E V Q D L H L A Q R -  
 b2 b3

Raw file 20150307\_Hepa1\_Top\_opt\_D1\_01\_1683 Scan 61410 Method TOF; CID Score 72.3 m/z 911.12 Gene names Rpp25l

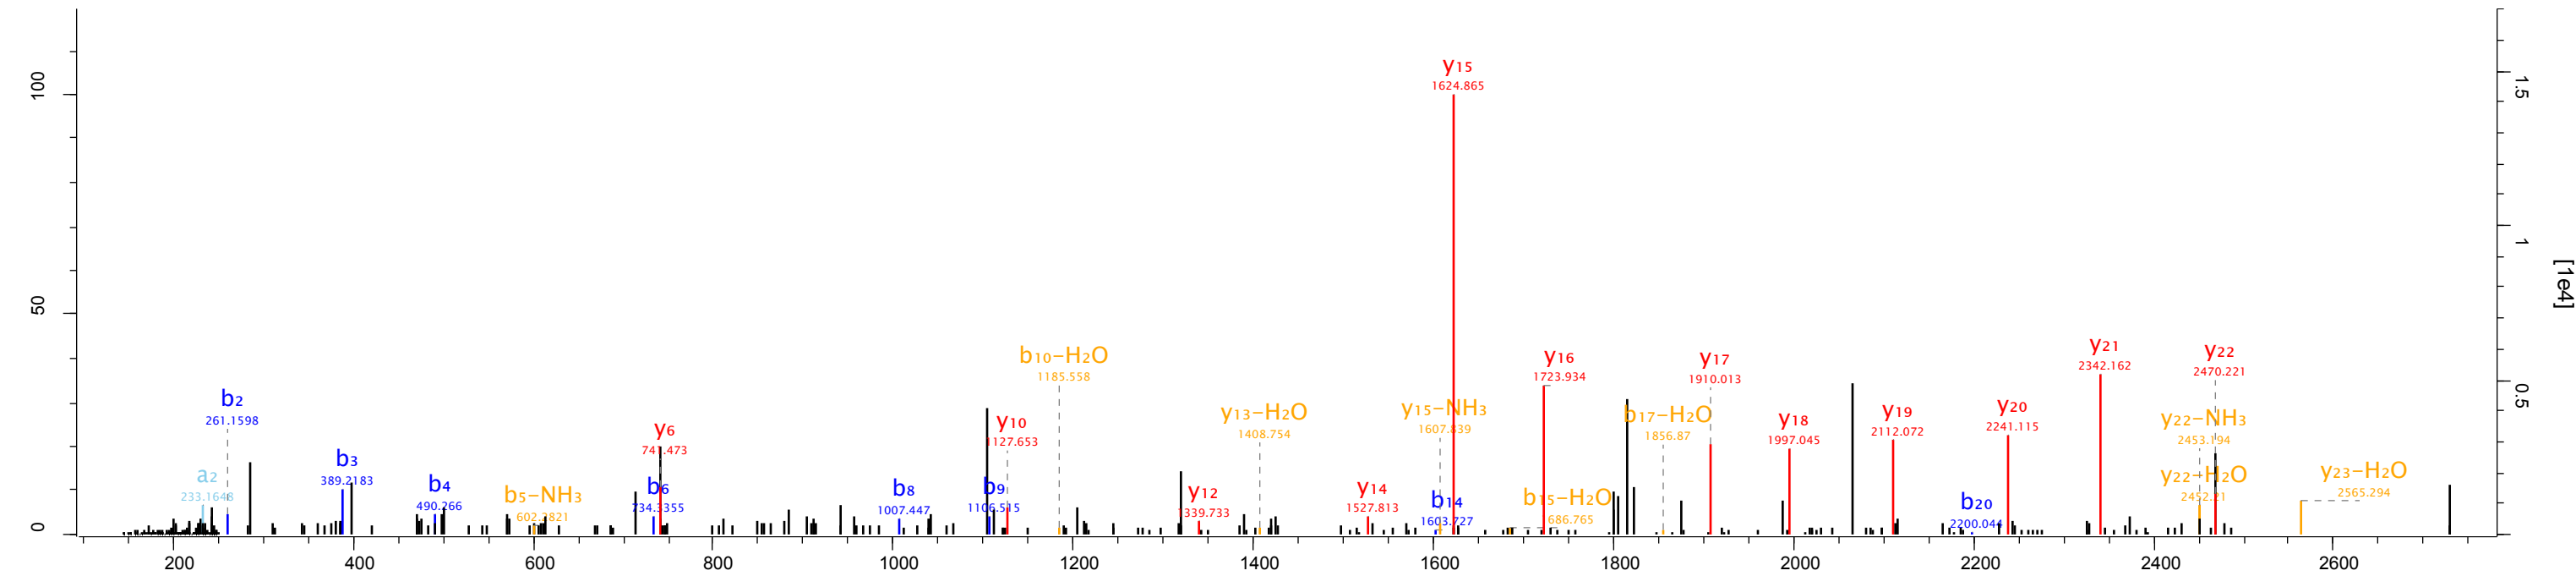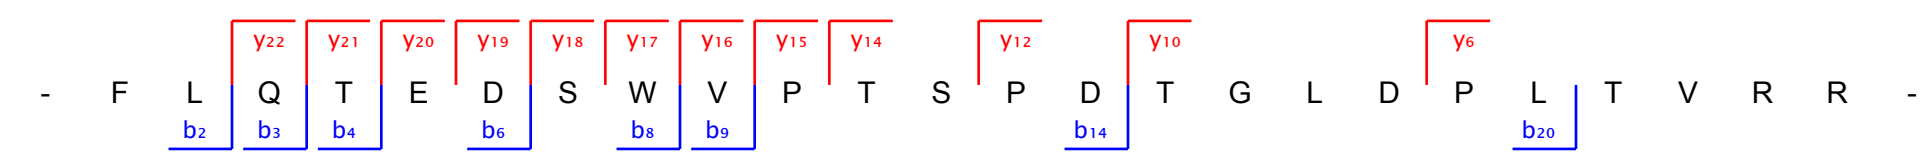

Raw file 20150307\_Hepa1\_Top\_opt\_D1\_01\_1683 Scan 63543 Method TOF; CID Score 94.28 m/z 1084.01 Gene names Ly6c2;Ly6c1

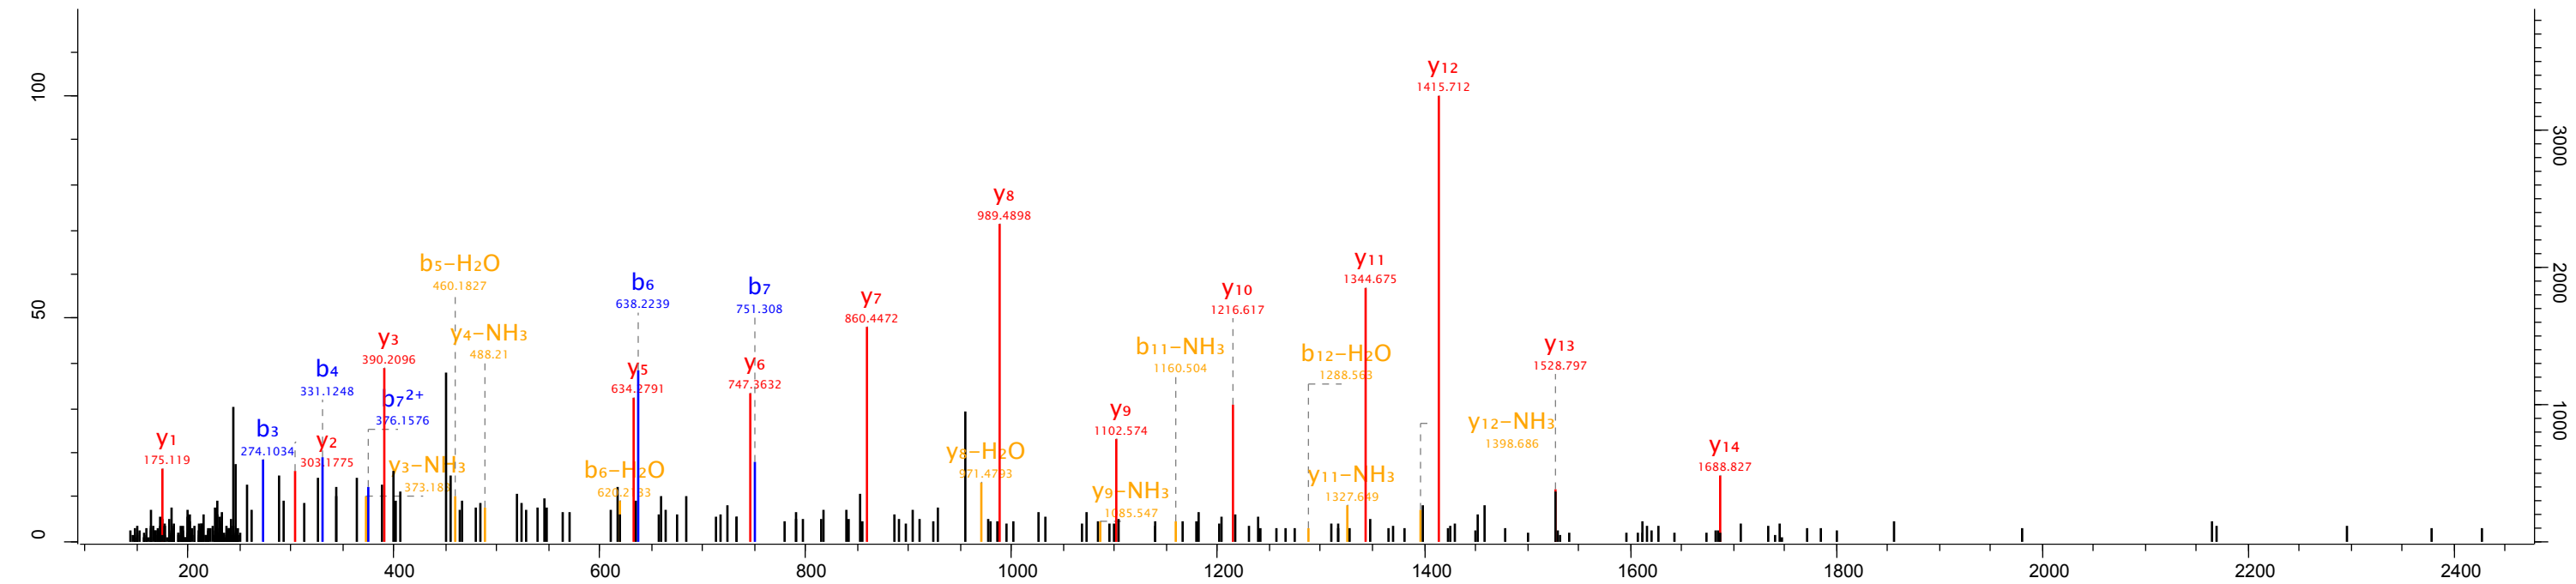

- A S D G F C I A Q N I E L I E D S Q R -

Fragmentation mapping (b and y ions):

- b<sub>3</sub> (D), b<sub>4</sub> (G)
- b<sub>6</sub> (C), b<sub>7</sub> (I)
- y<sub>1</sub> (R), y<sub>2</sub> (Q), y<sub>3</sub> (S)
- y<sub>5</sub> (E), y<sub>6</sub> (I), y<sub>7</sub> (L), y<sub>8</sub> (E), y<sub>9</sub> (I), y<sub>10</sub> (N), y<sub>11</sub> (Q), y<sub>12</sub> (A), y<sub>13</sub> (I), y<sub>14</sub> (C)

Raw file 20150307\_Hepa1\_Top\_opt\_D1\_01\_1683 Scan 64066 Method TOF; CID Score 69.03 m/z 660.36 Gene names Ptpa

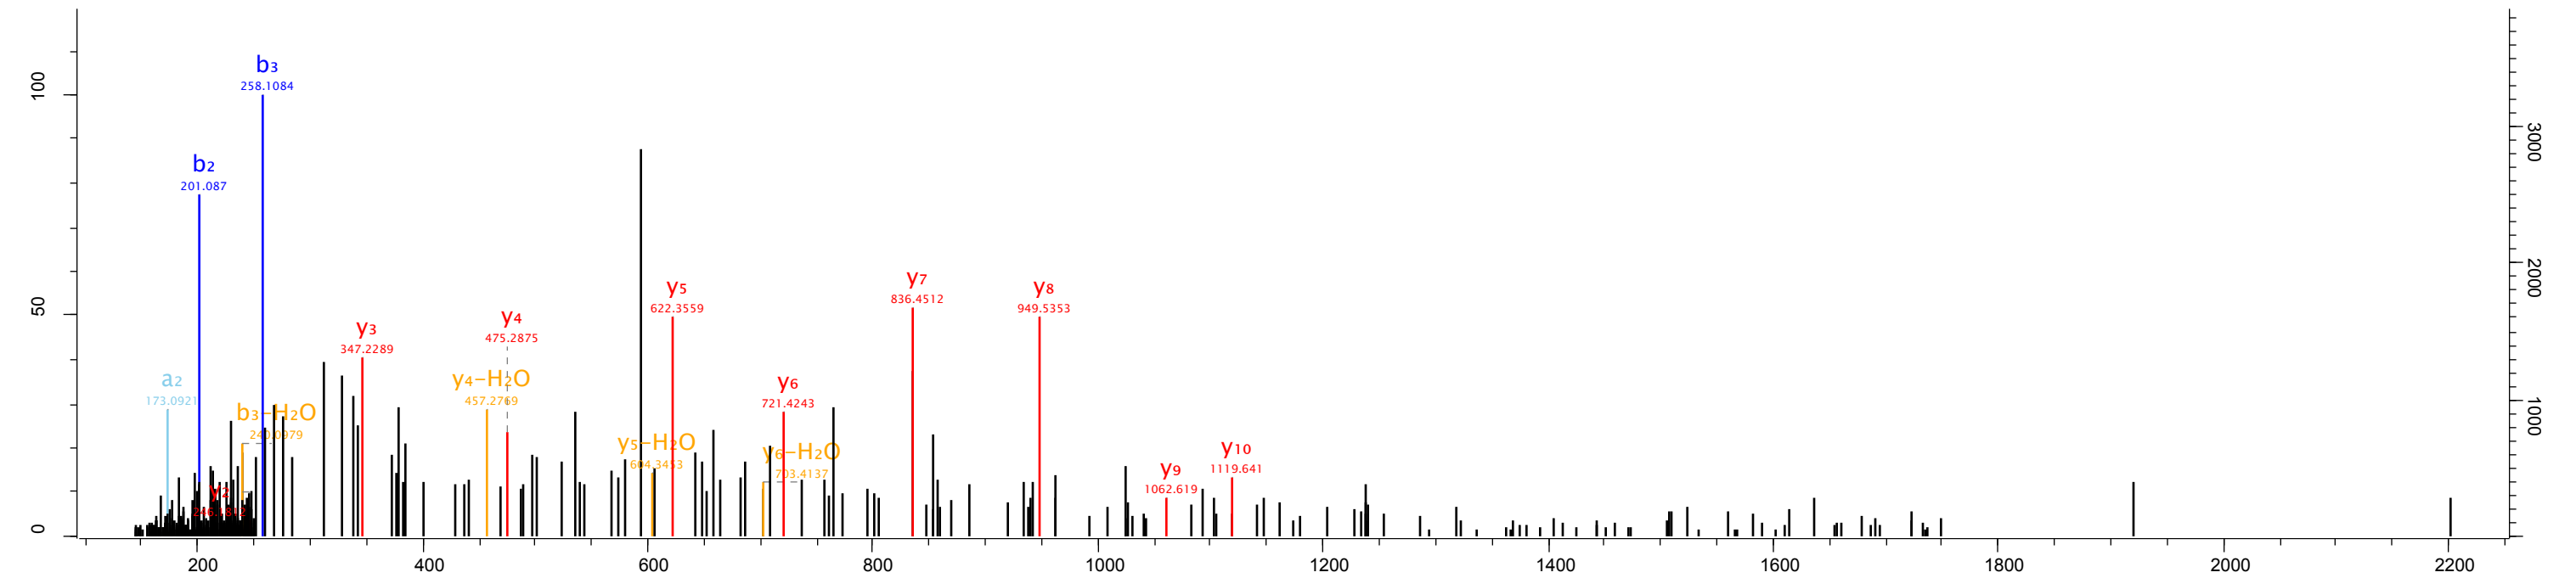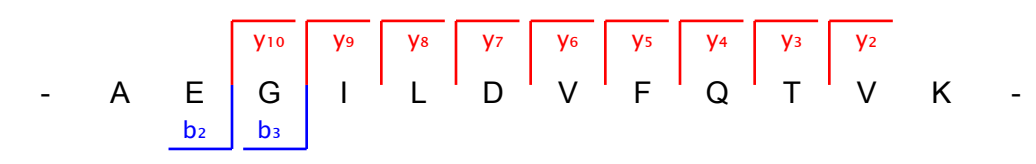

Raw file 20150307\_Hepa1\_Top\_opt\_D1\_01\_1683 Scan 64551 Method TOF; CID Score 47.69 m/z 687.4 Gene names Hpgds

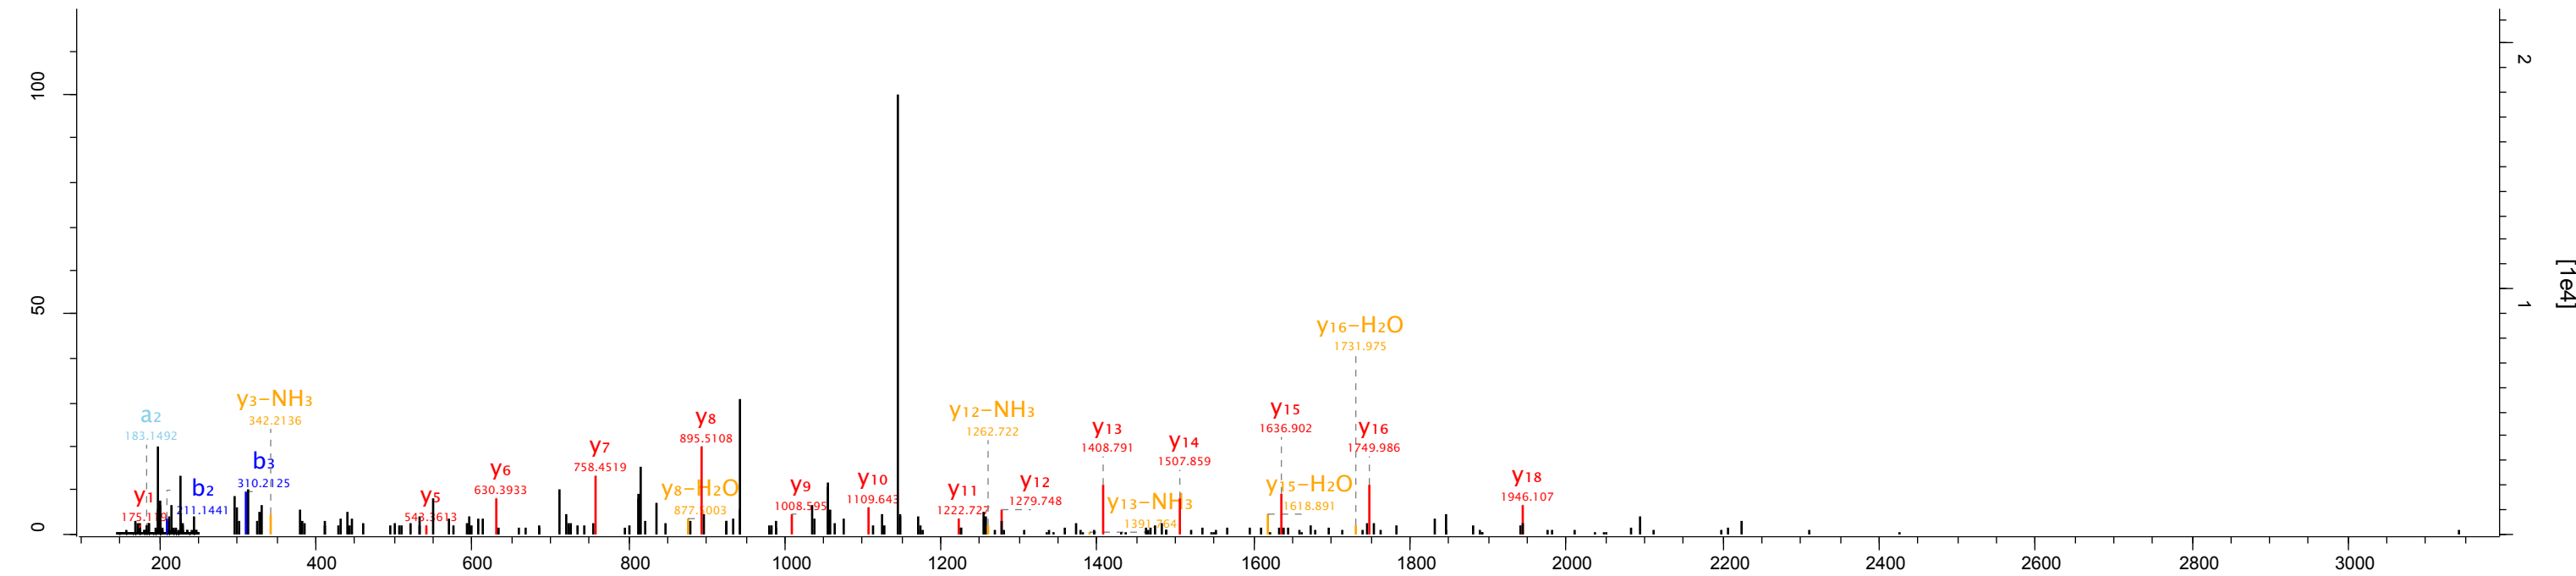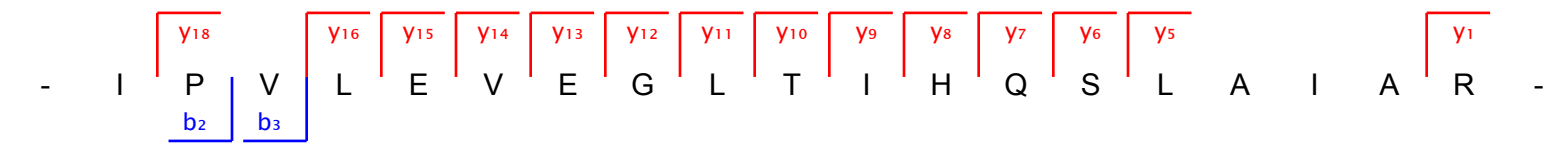

Raw file  
20150307\_Hepa1\_Top\_opt\_D1\_01\_1683

Scan 64751 Method TOF; CID Score 38.27 m/z 869.44 Gene names Als2

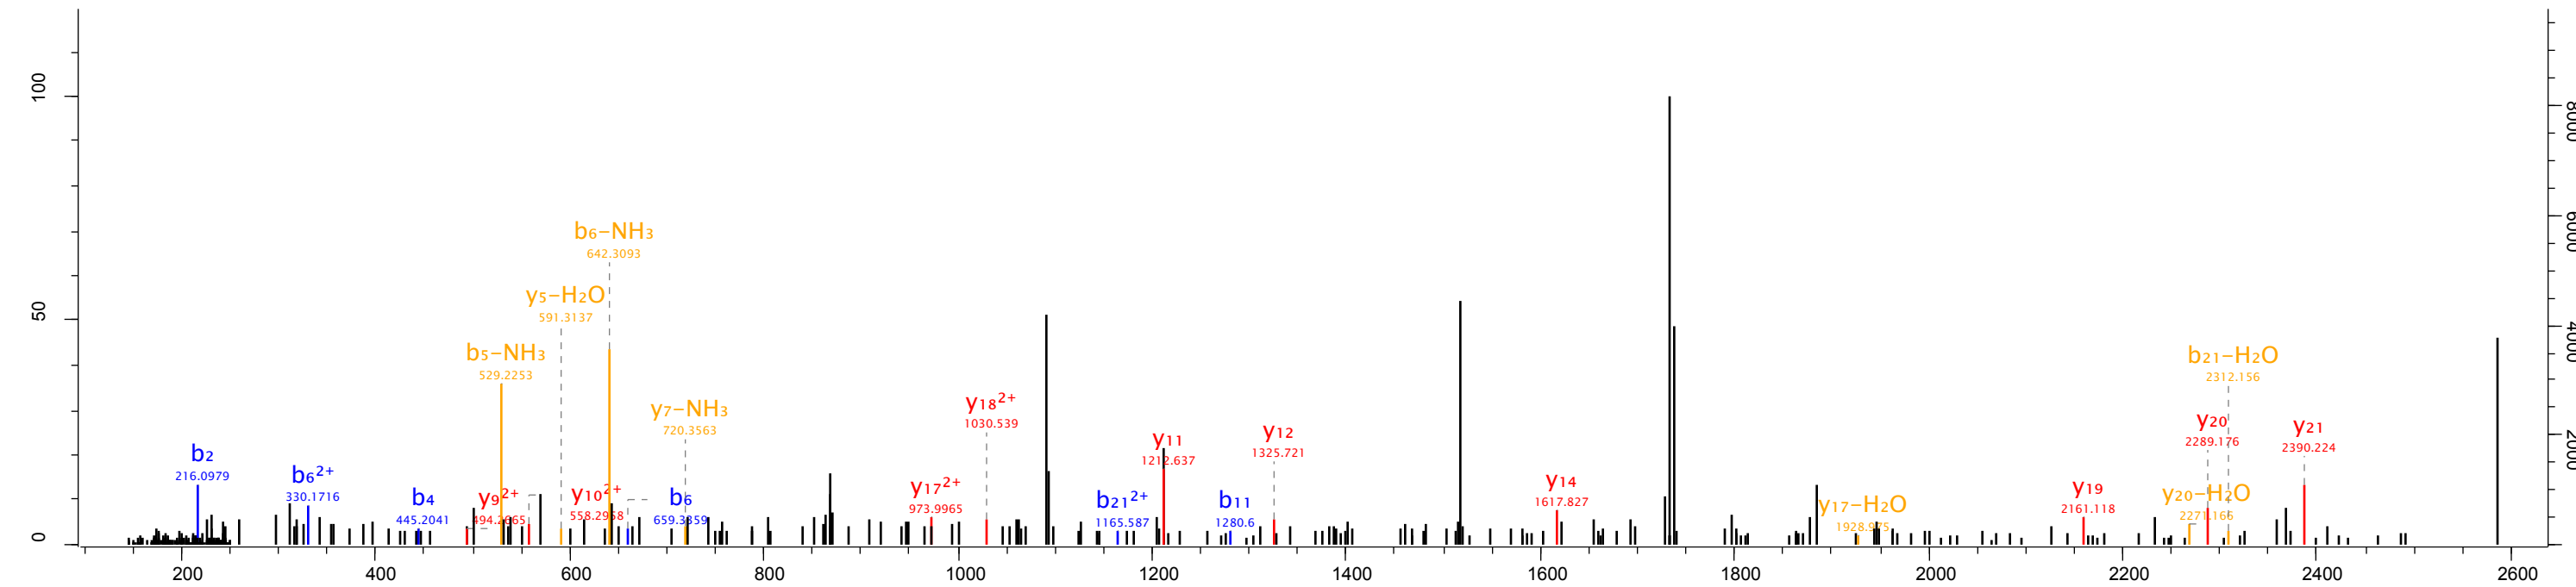

- S Q T Q T L E S L E Y I P Q H I G A F S V E K -

Fragmentation scheme showing b-ions (blue) and y-ions (red) corresponding to the peptide sequence. Brackets indicate the charge state of the ions.

- b<sub>2</sub> (Q-T)
- b<sub>4</sub> (Q-T)
- b<sub>6</sub> (L-E)
- b<sub>11</sub> (Y-I)
- b<sub>21</sub><sup>2+</sup> (V-E)
- y<sub>9</sub><sup>2+</sup> (T-L)
- y<sub>10</sub><sup>2+</sup> (L-E)
- y<sub>12</sub> (I-P)
- y<sub>11</sub> (P-Q)
- y<sub>14</sub> (L-E)
- y<sub>17</sub><sup>2+</sup> (T-L)
- y<sub>18</sub><sup>2+</sup> (L-E)
- y<sub>19</sub> (T-L)
- y<sub>20</sub> (Q-T)
- y<sub>21</sub> (S-Q)

Raw file 20150307\_Hepa1\_Top\_opt\_D1\_01\_1683 Scan 65230 Method TOF; CID Score 91.4 m/z 672.05 Gene names Tsen54

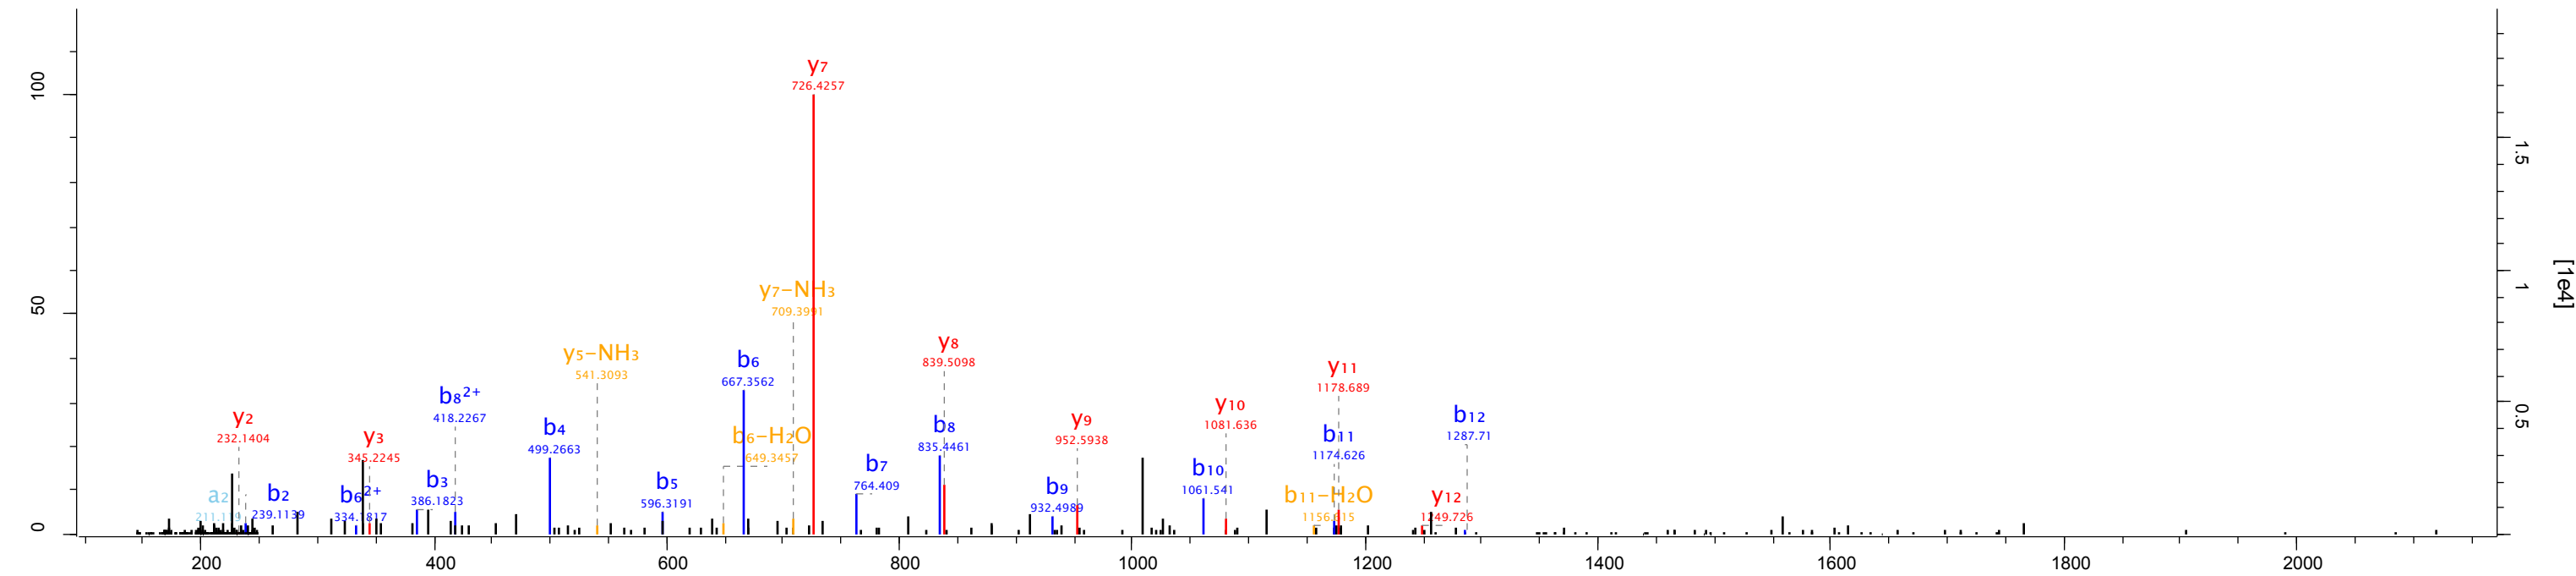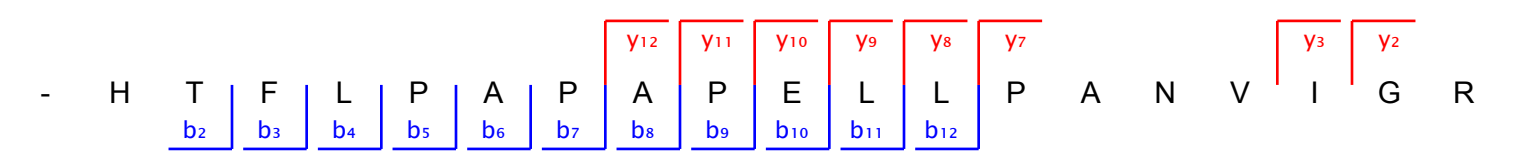



Raw file 20150307\_Hepa1\_Top\_opt\_D1\_01\_1683 Scan 65233 Method TOF; CID Score 34.99 m/z 973.47 Gene names Ndufa3

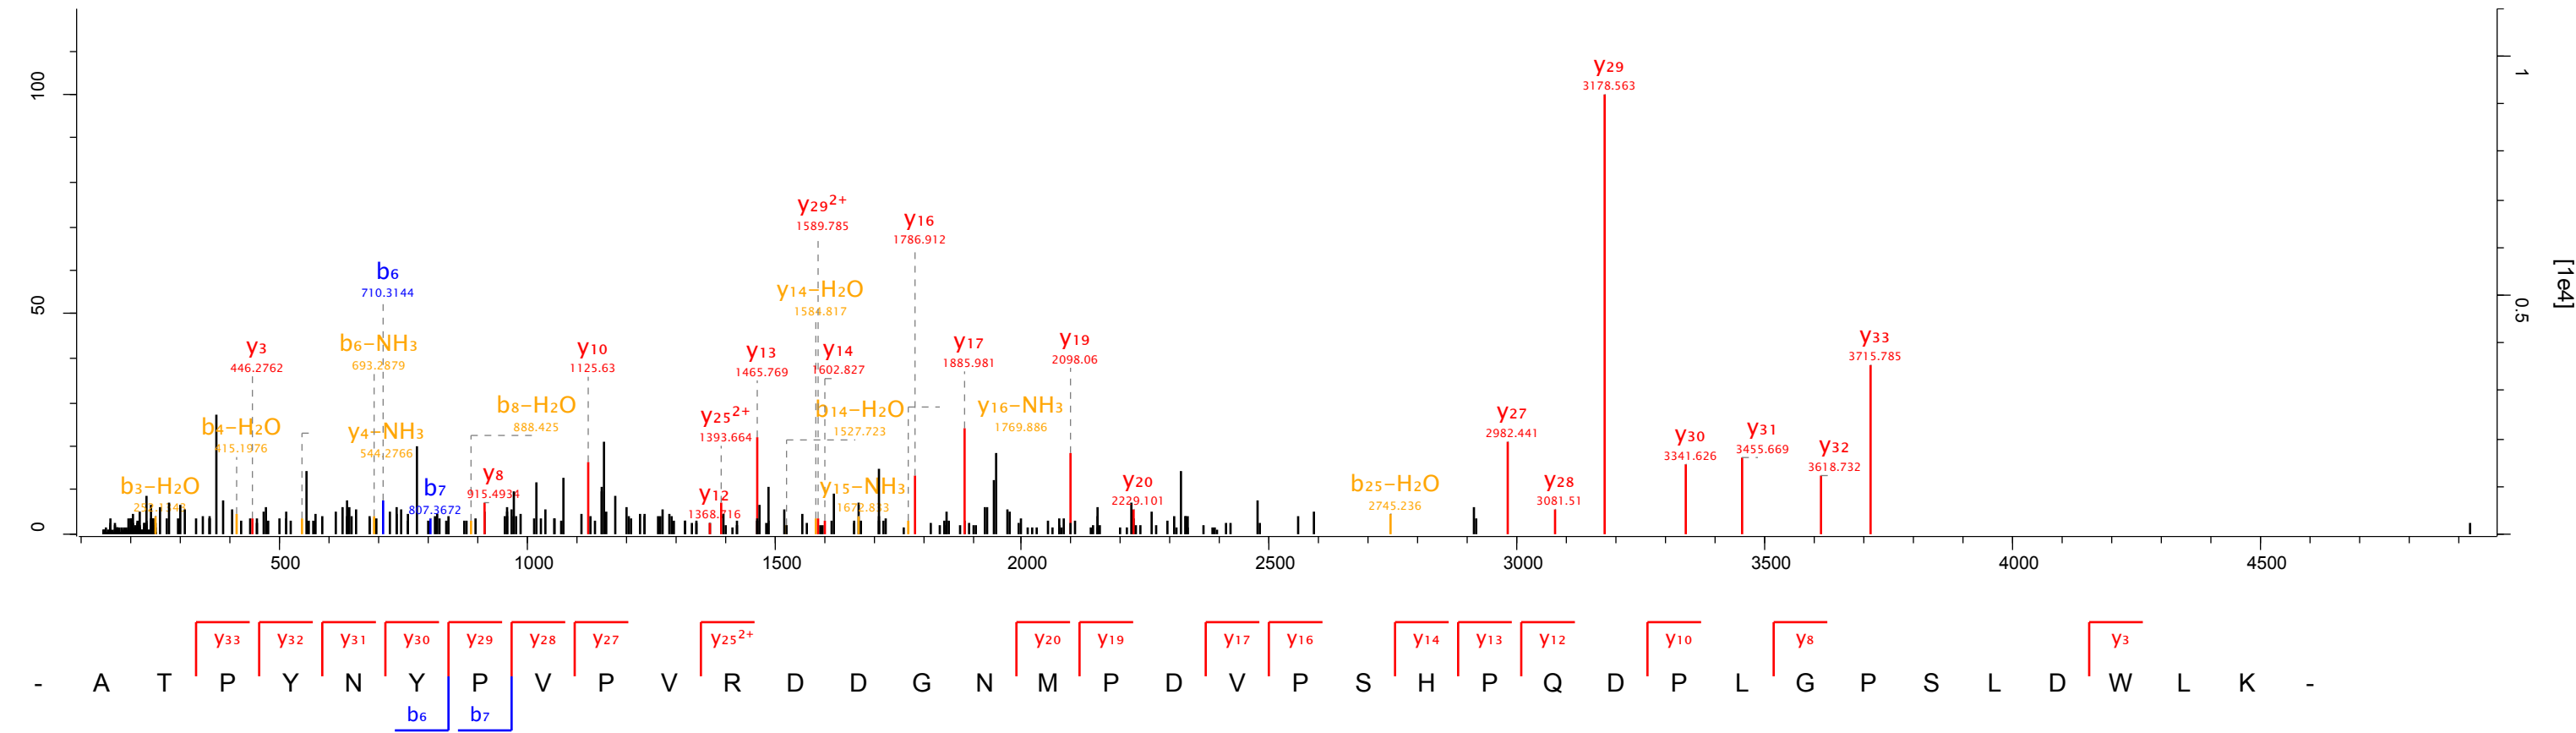

Raw file 20150307\_Hepa1\_Top\_opt\_D1\_01\_1683 Scan 66257 Method TOF; CID Score 86.49 m/z 969.47 Gene names Enpep

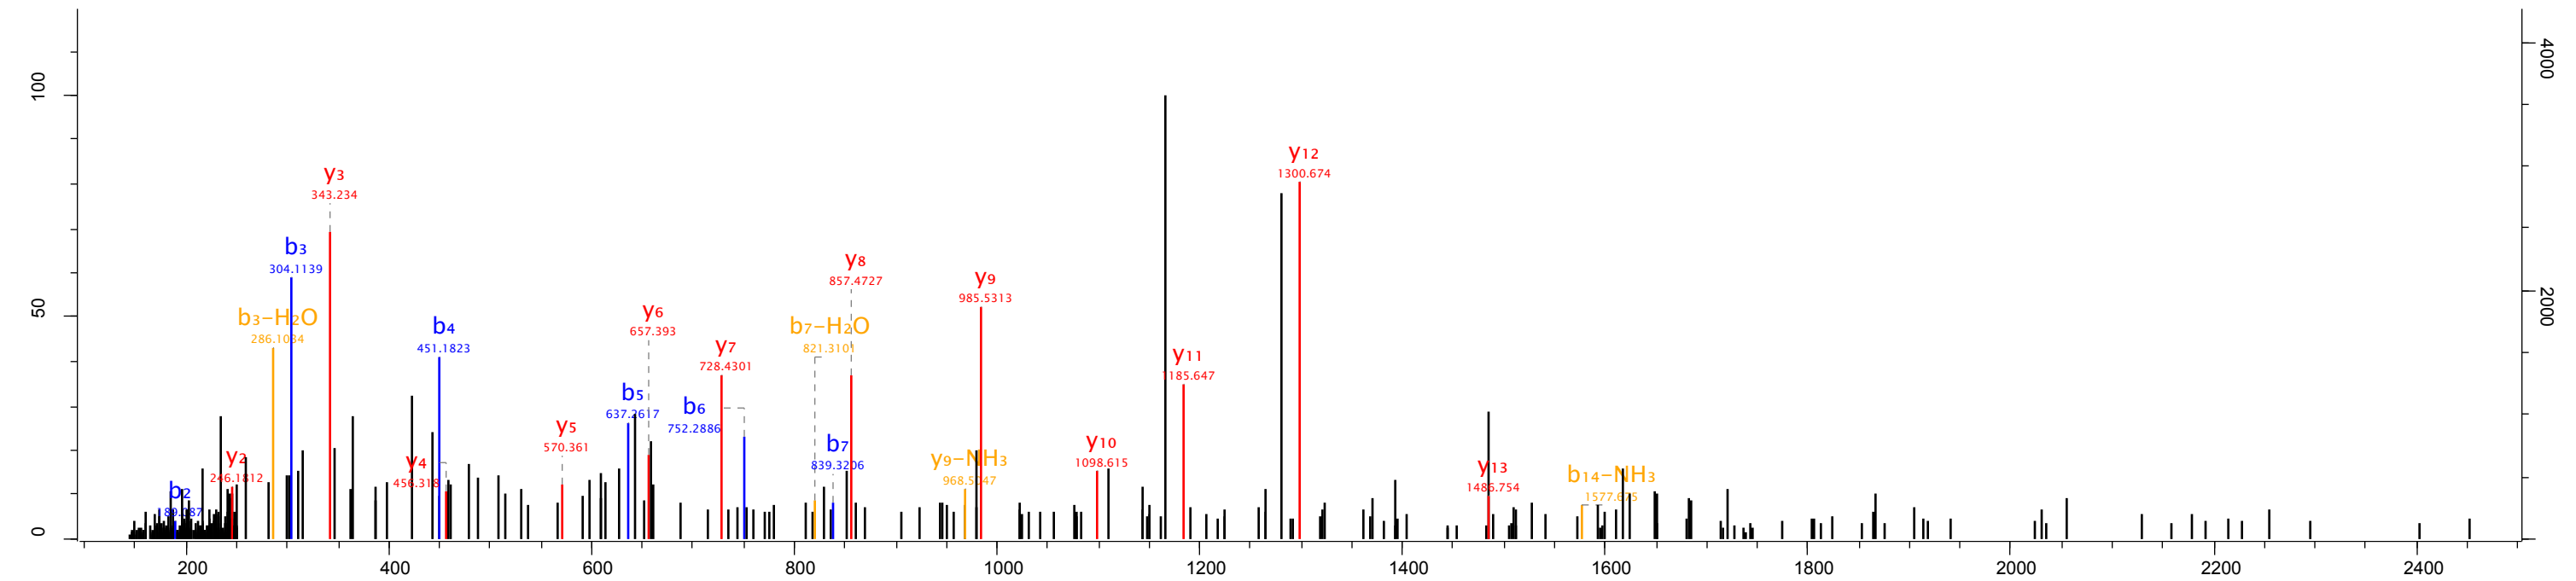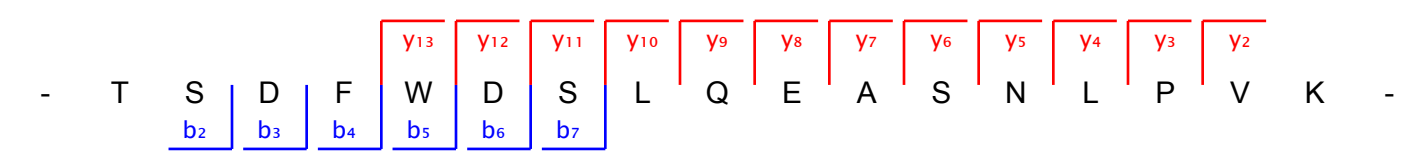

Raw file 20150307\_Hepa1\_Top\_opt\_D1\_01\_1683 Scan 67304 Method TOF; CID Score 56.82 m/z 960.47 Gene names Bcar3

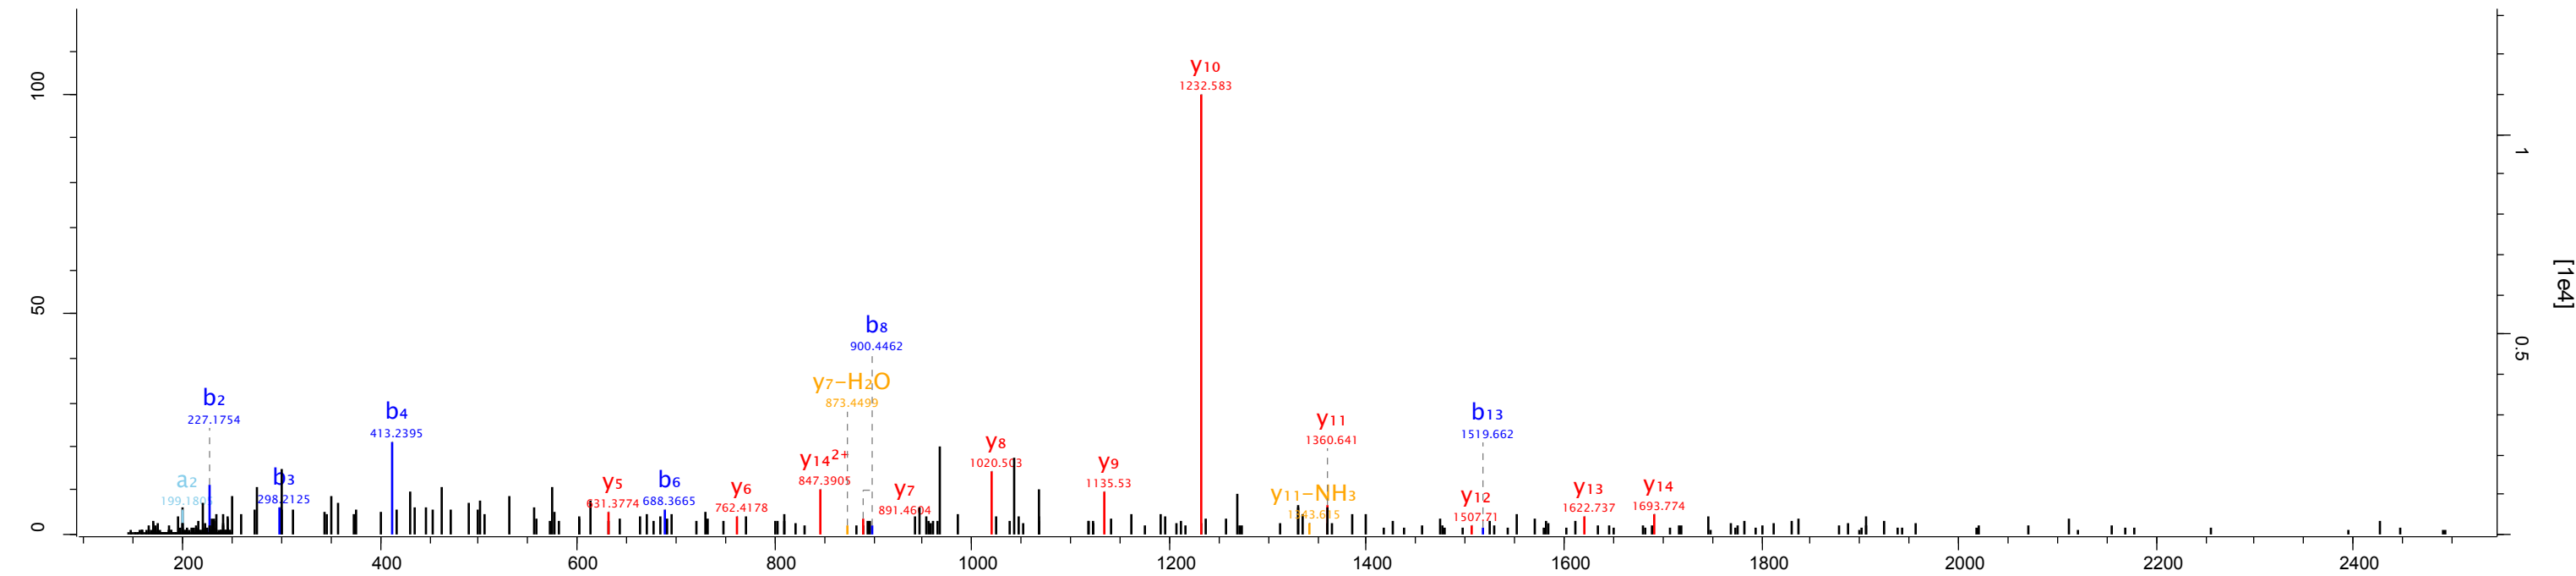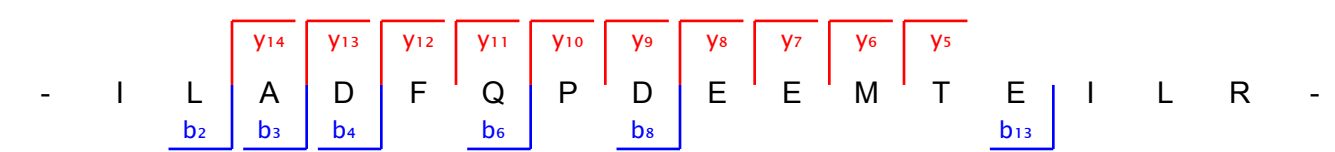

Raw file: 20150307\_Hepa1\_Top\_opt\_D1\_01\_1683  
 Scan: 68708 Method: TOF; CID Score: 62.06 m/z: 843.98 Gene names: Slc25a30;Slc25a14

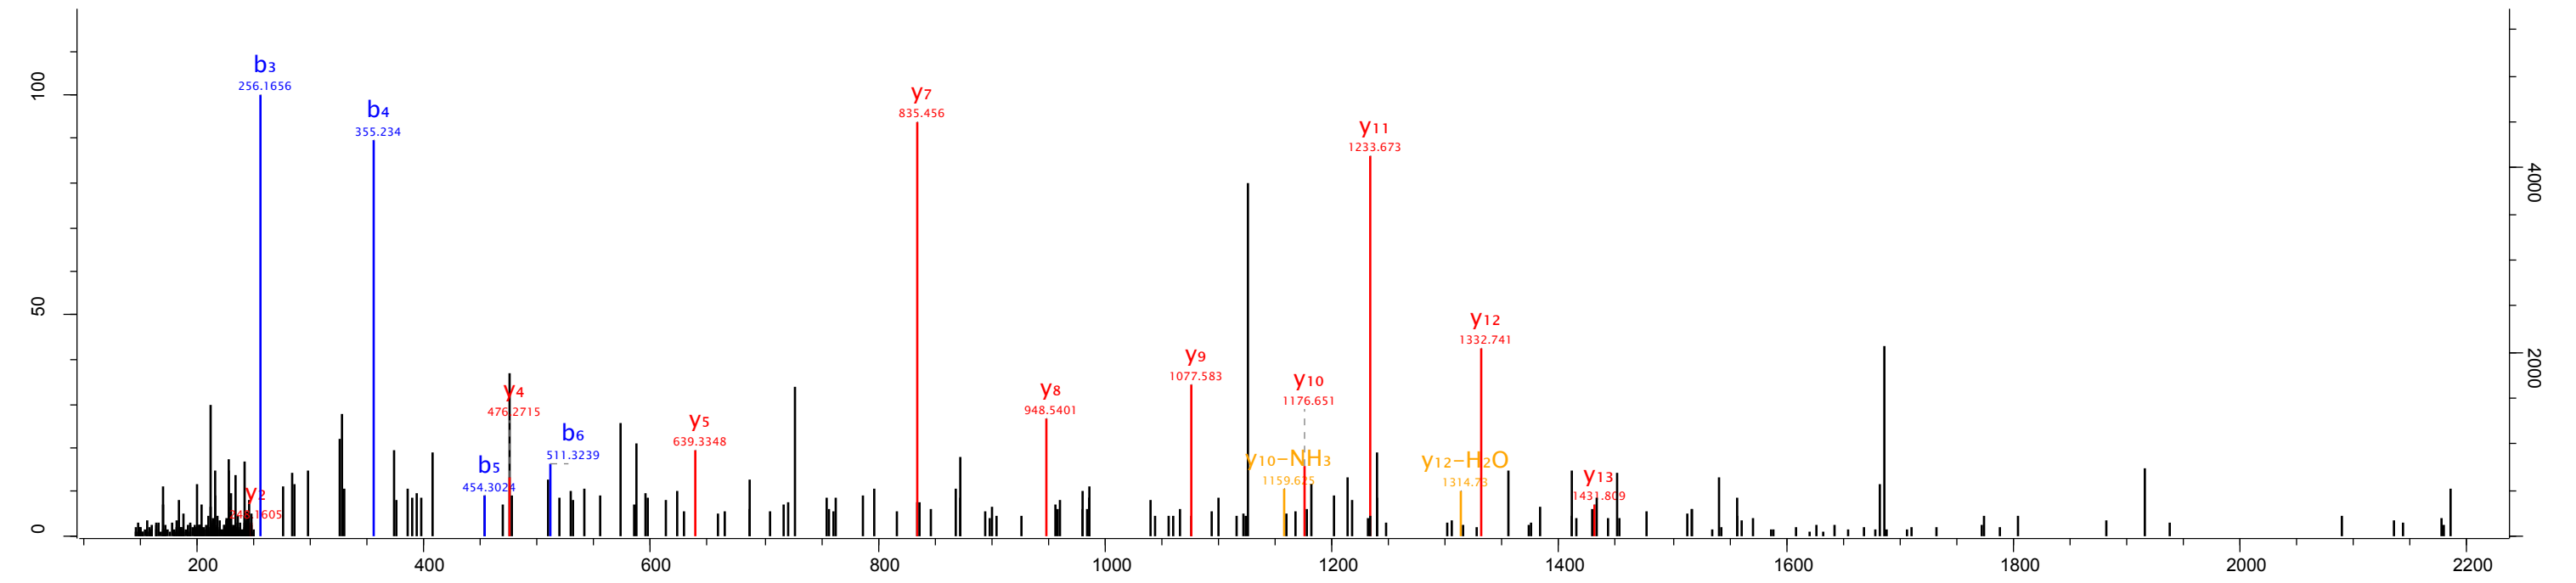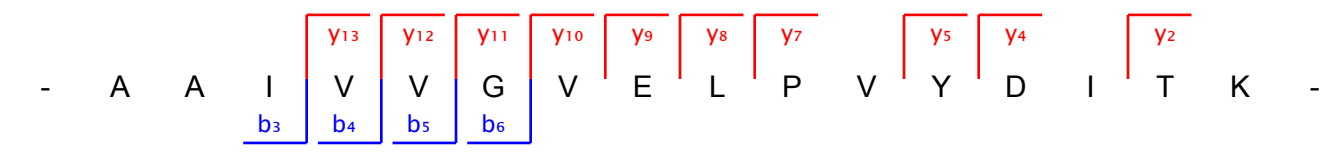

Raw file 20150307\_Hepa1\_Top\_opt\_D1\_01\_1683 Scan 68775 Method TOF; CID Score 52.17 m/z 837.41 Gene names Mmp13

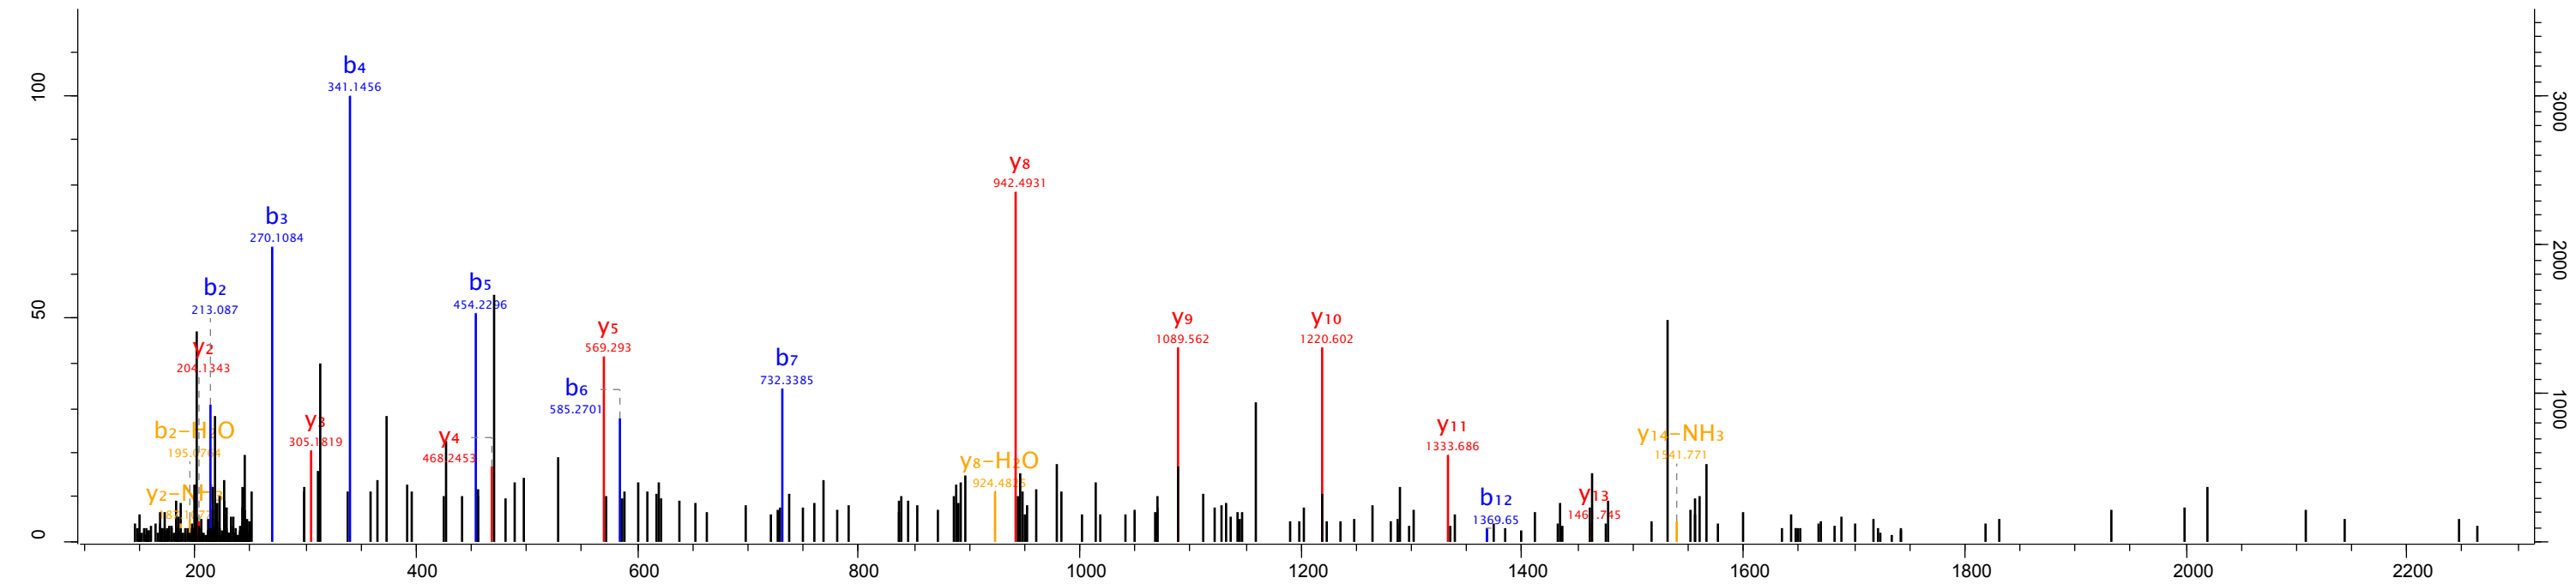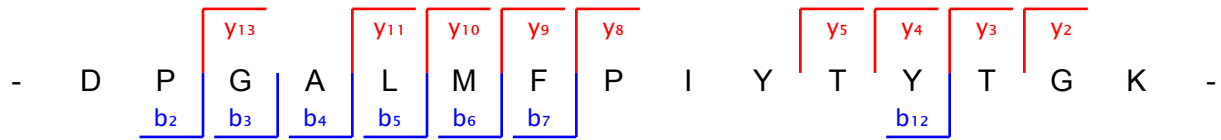

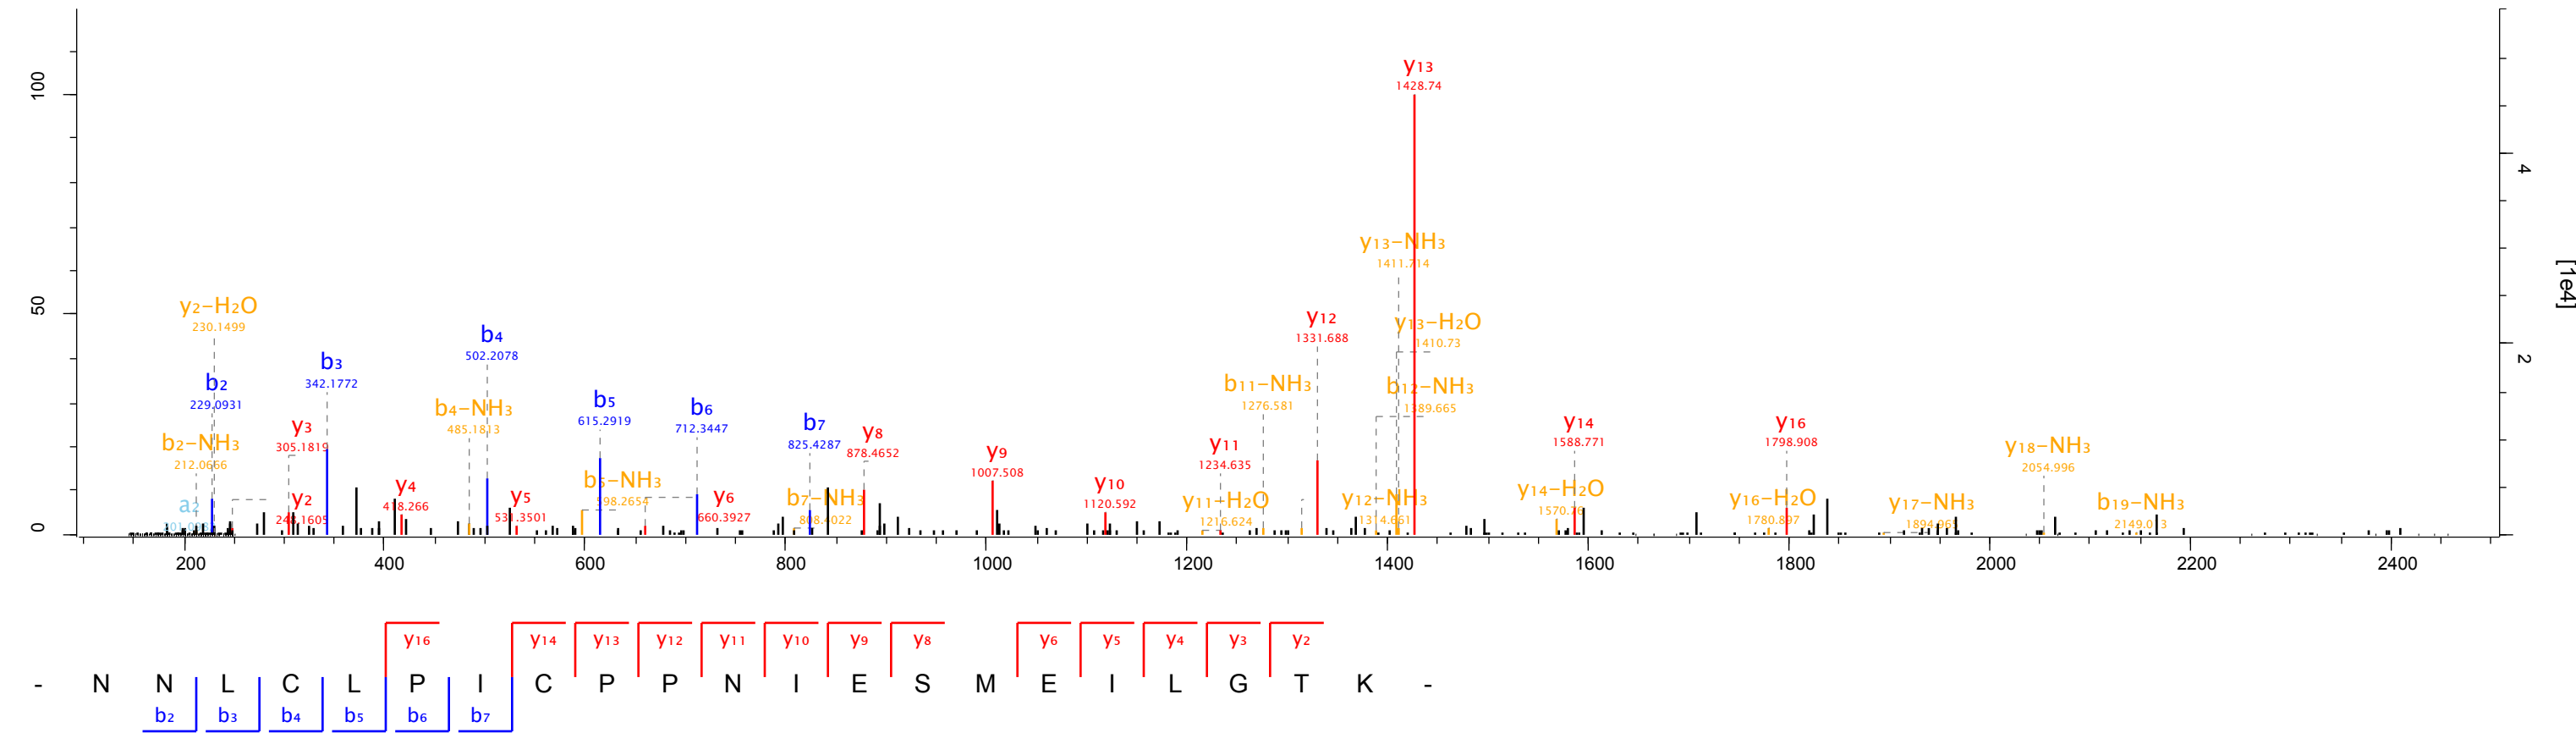

Raw file 20150307\_Hepa1\_Top\_opt\_D1\_01\_1683 Scan 71086 Method TOF; CID Score 65.02 m/z 1042.54 Gene names Gpnmb

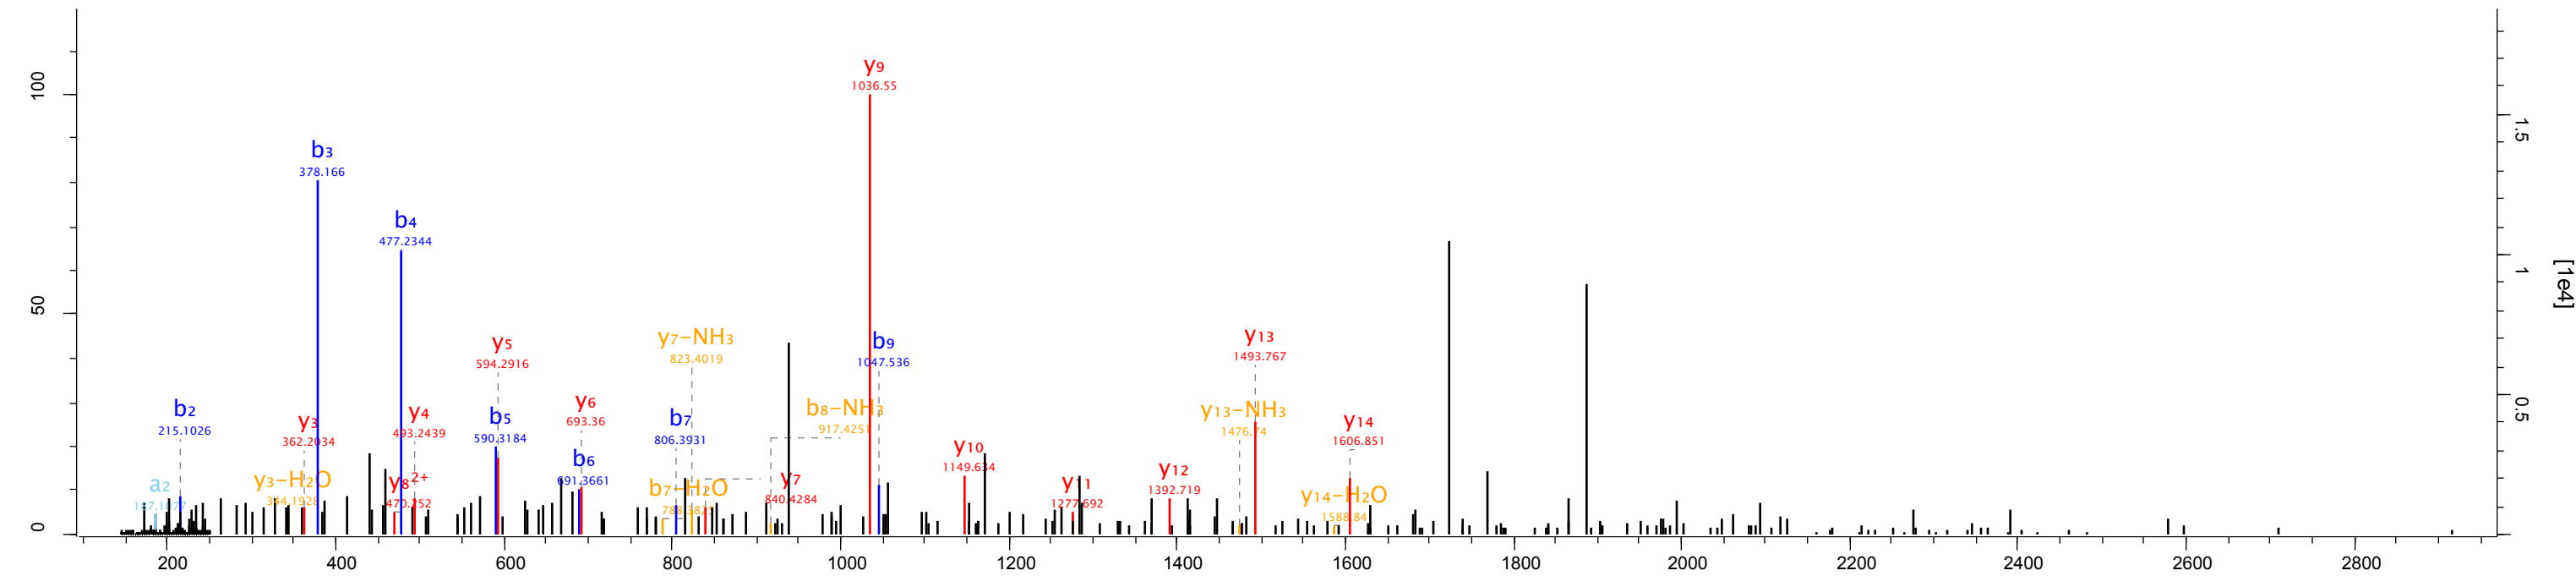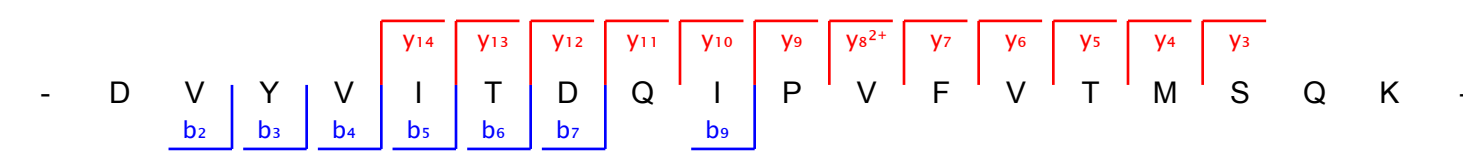

Raw file 20150307\_Hepa1\_Top\_opt\_D1\_01\_1683 Scan 71898 Method TOF; CID Score 62.03 m/z 948.48 Gene names Polr2f

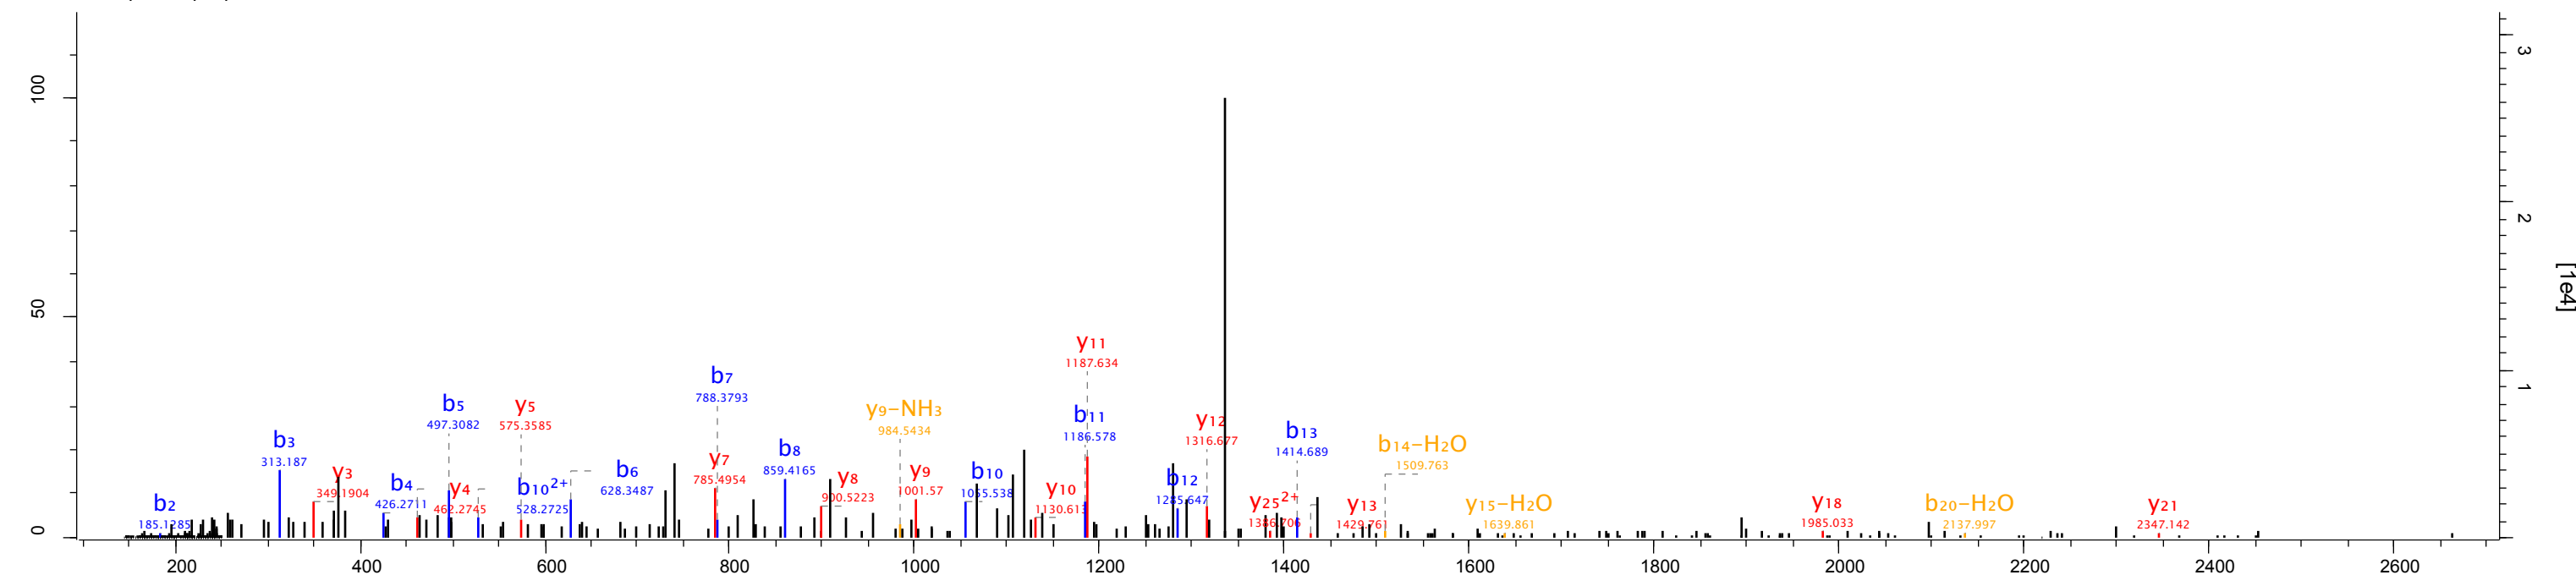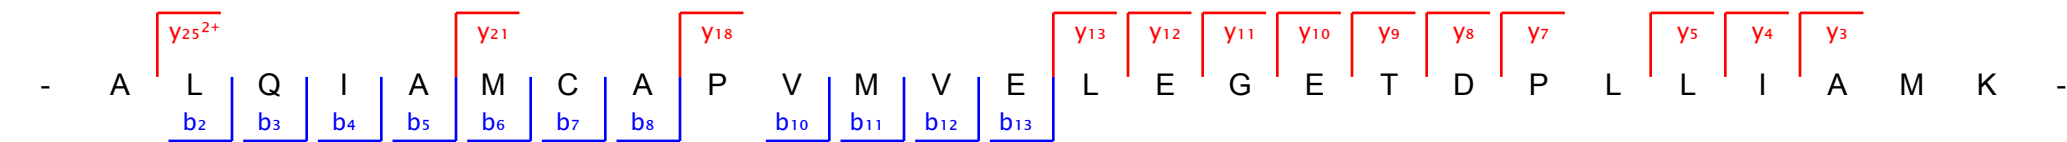



Raw file: 20150307\_Hepa1\_Top\_opt\_D1\_01\_1683  
 Scan: 72128 Method: TOF; CID Score: 68.64 m/z: 693.35 Gene names: Ninj1

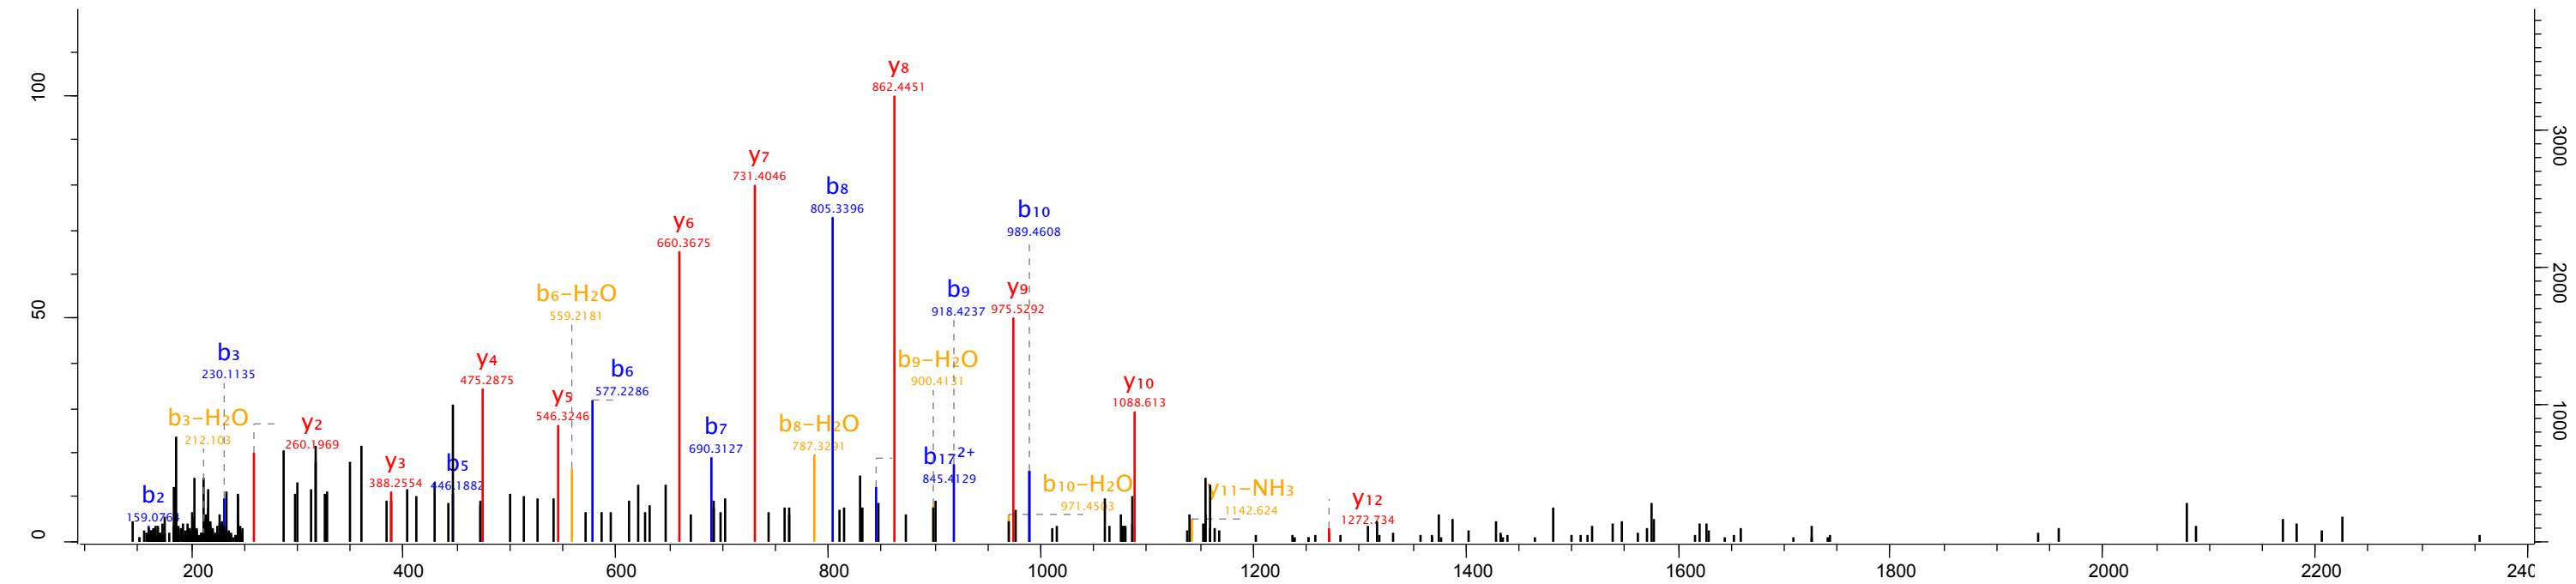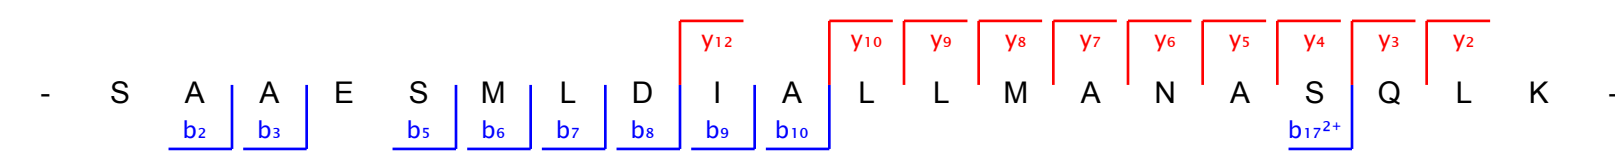

Raw file 20150307\_Hepa2\_Top\_opt\_D2\_01\_1673 Scan 6252 Method TOF; CID Score 73.5 m/z 605.74 Gene names Fst

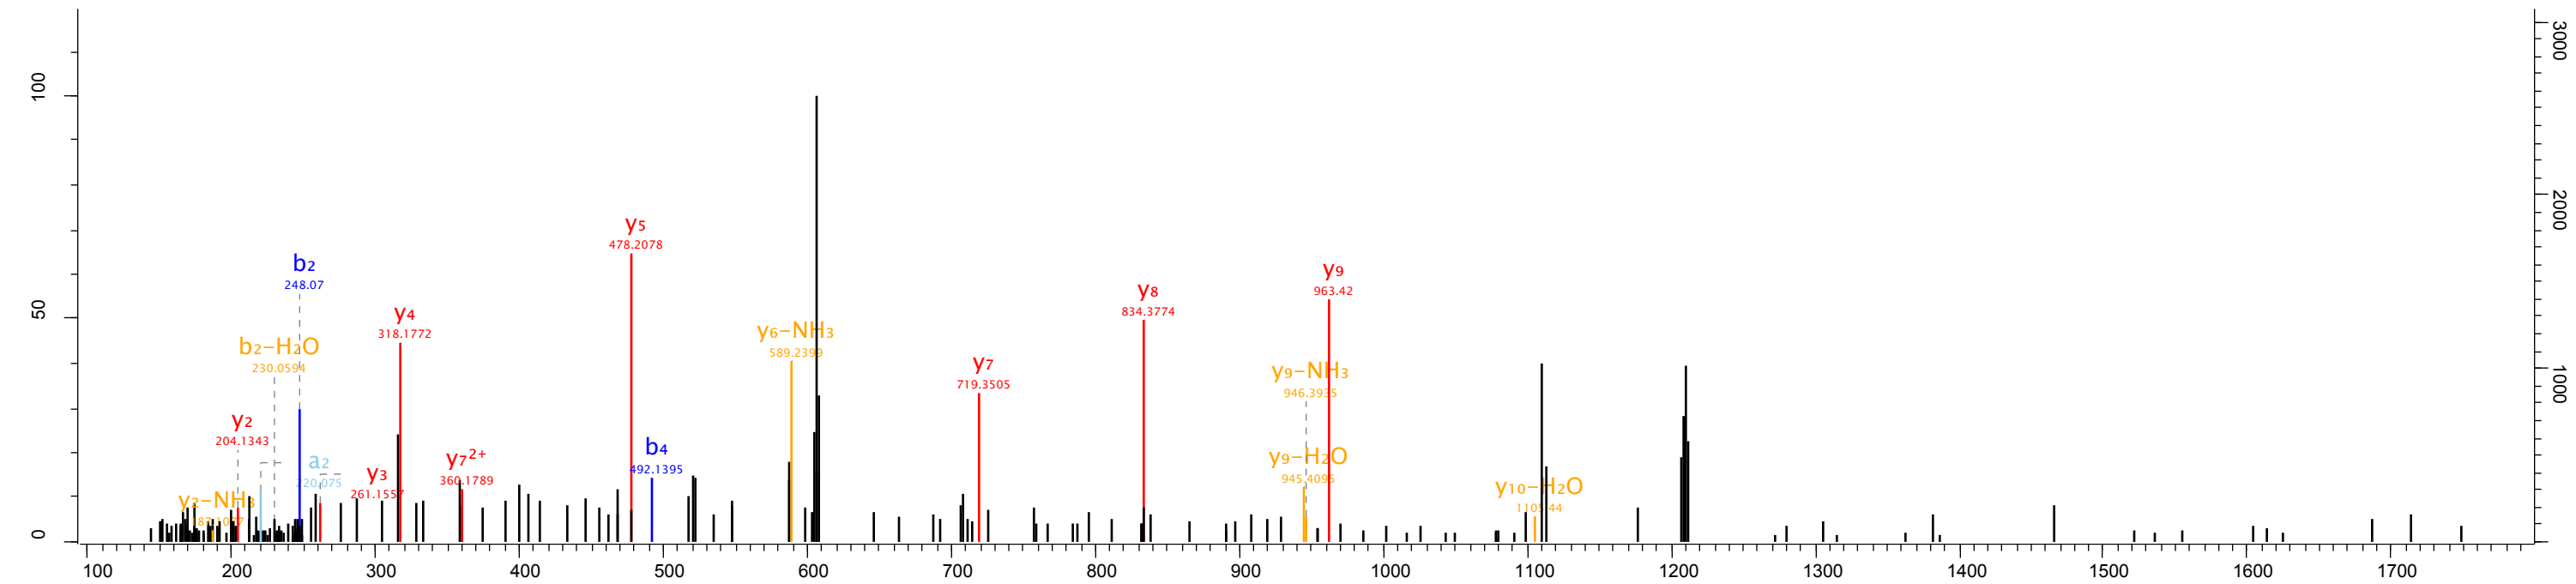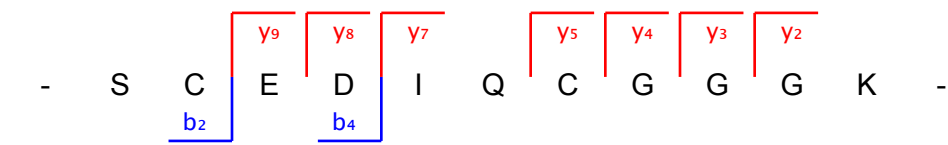

Raw file: 20150307\_Hepa2\_Top\_opt\_D2\_01\_1673  
 Scan: 10356 Method: TOF; CID Score: 83.95 m/z: 541.74 Gene names: Sprr2k;Sprr2b;Sprr2g;Sprr2d;Sprr2h

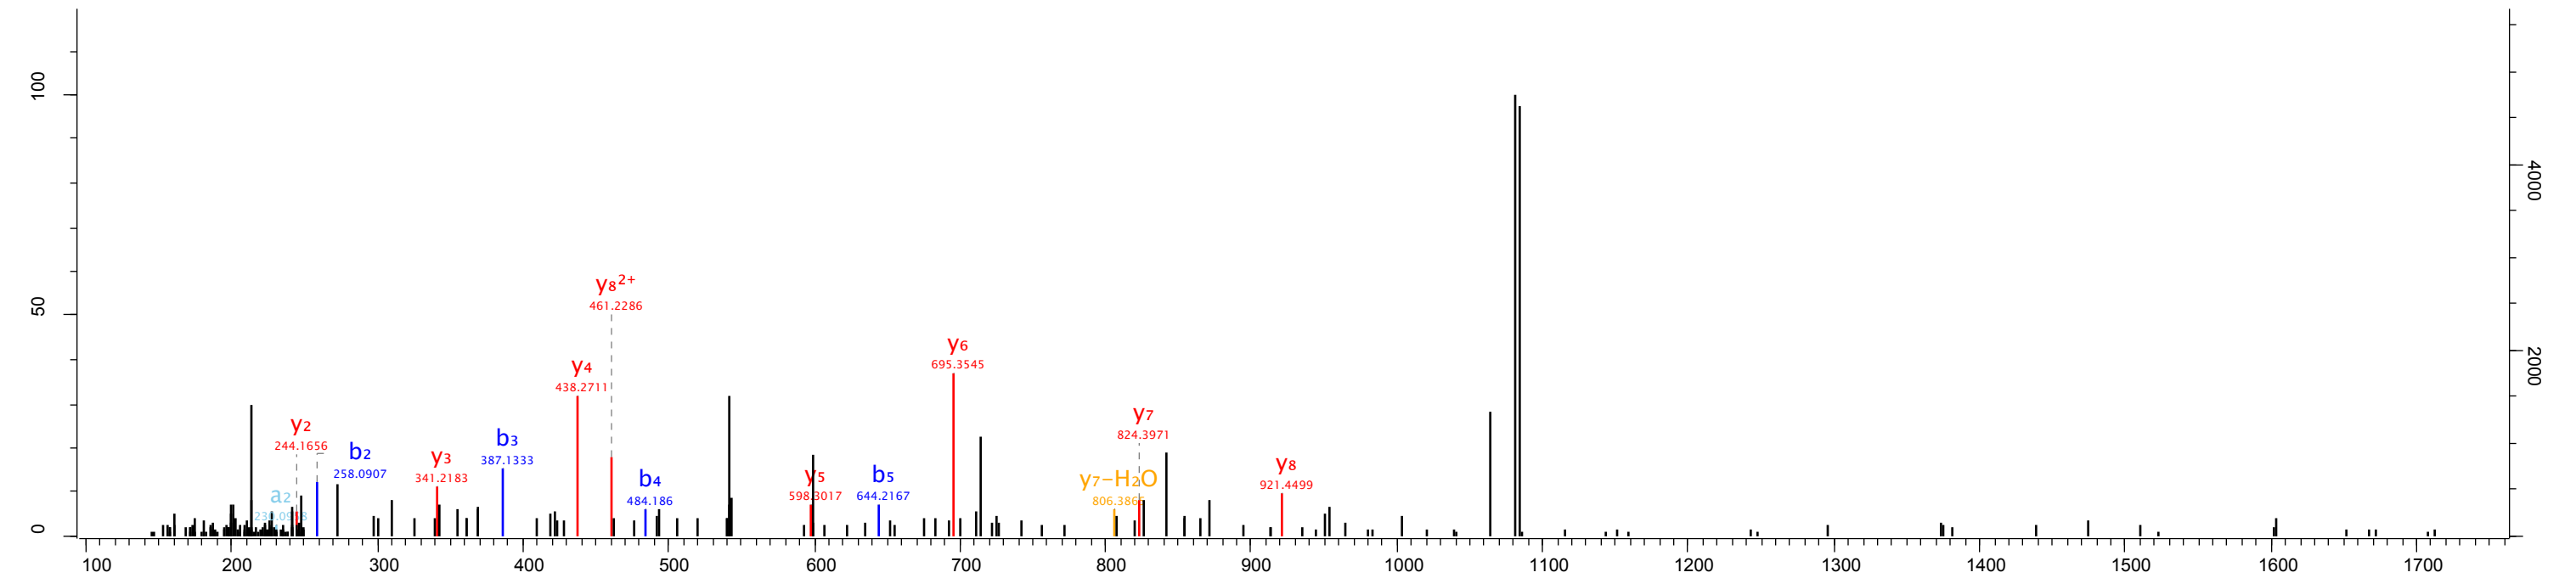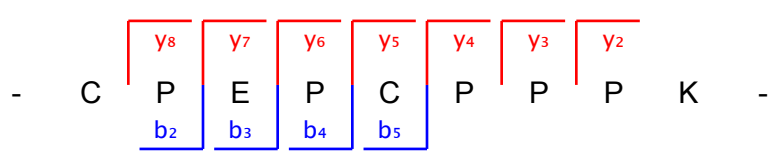

Raw file 20150307\_Hepa2\_Top\_opt\_D2\_01\_1673 Scan 13469 Method TOF; CID Score 67.42 m/z 576.28 Gene names Gm17296

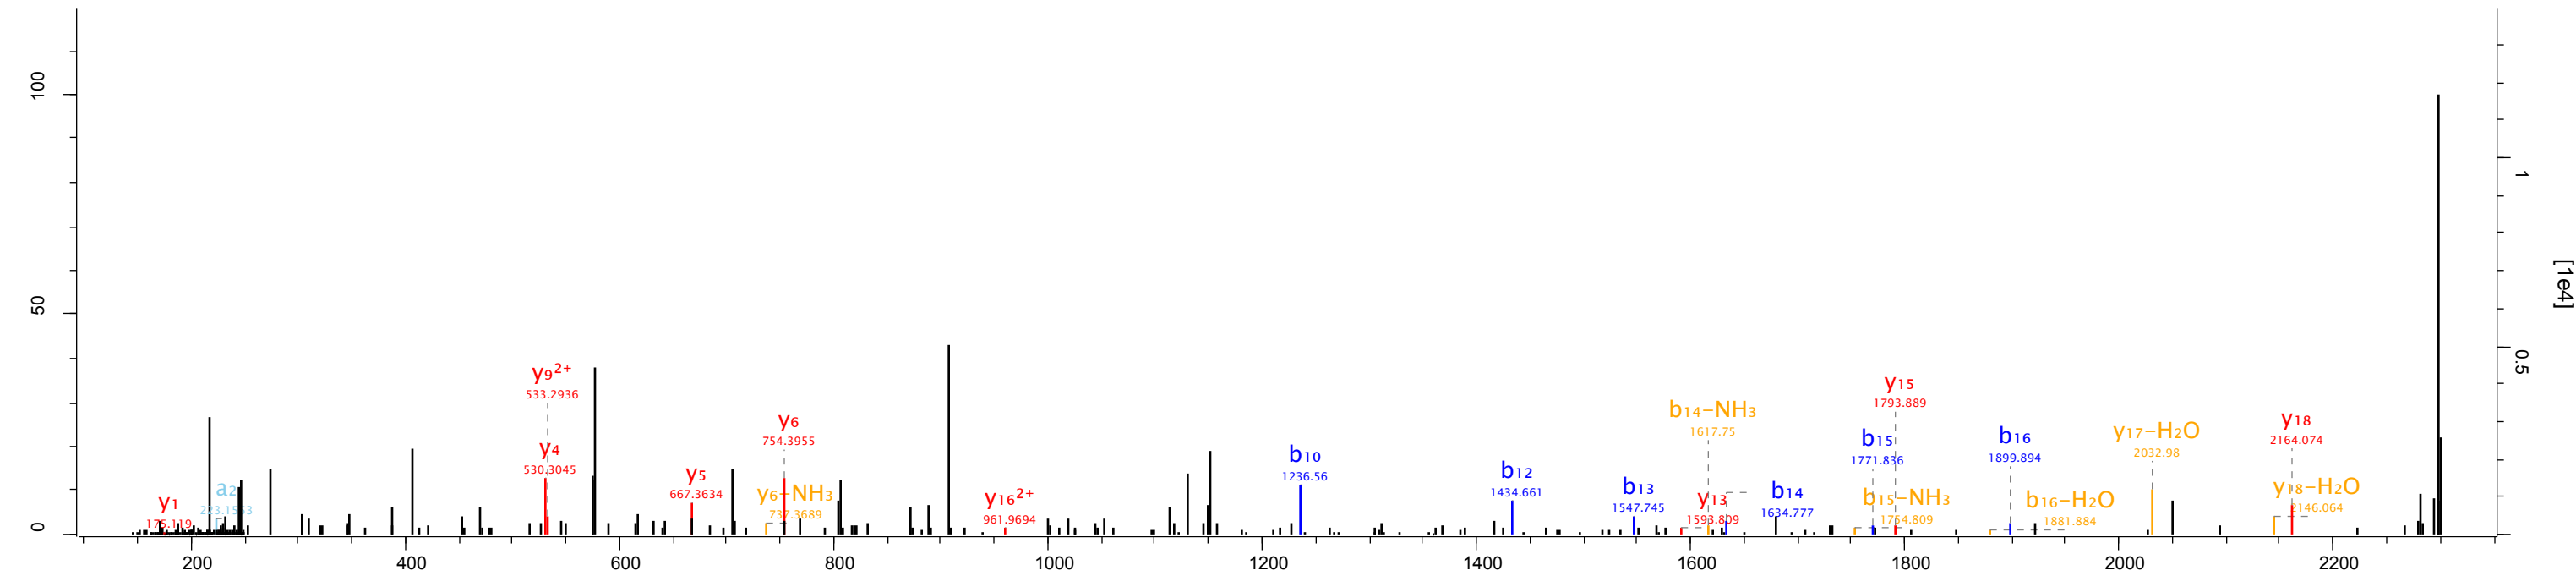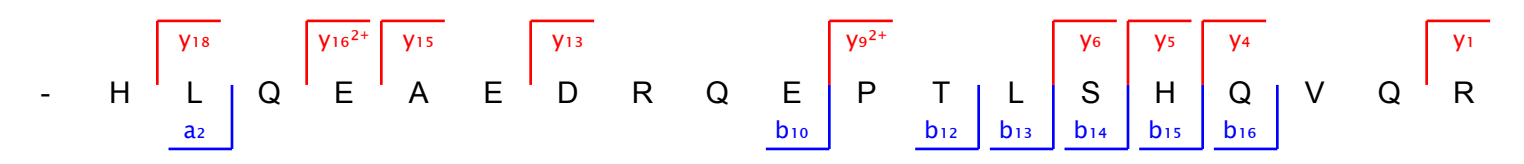

Raw file 20150307\_Hepa2\_Top\_opt\_D2\_01\_1673 Scan 13493 Method TOF; CID Score 85.92 m/z 647.3 Gene names Polr3e

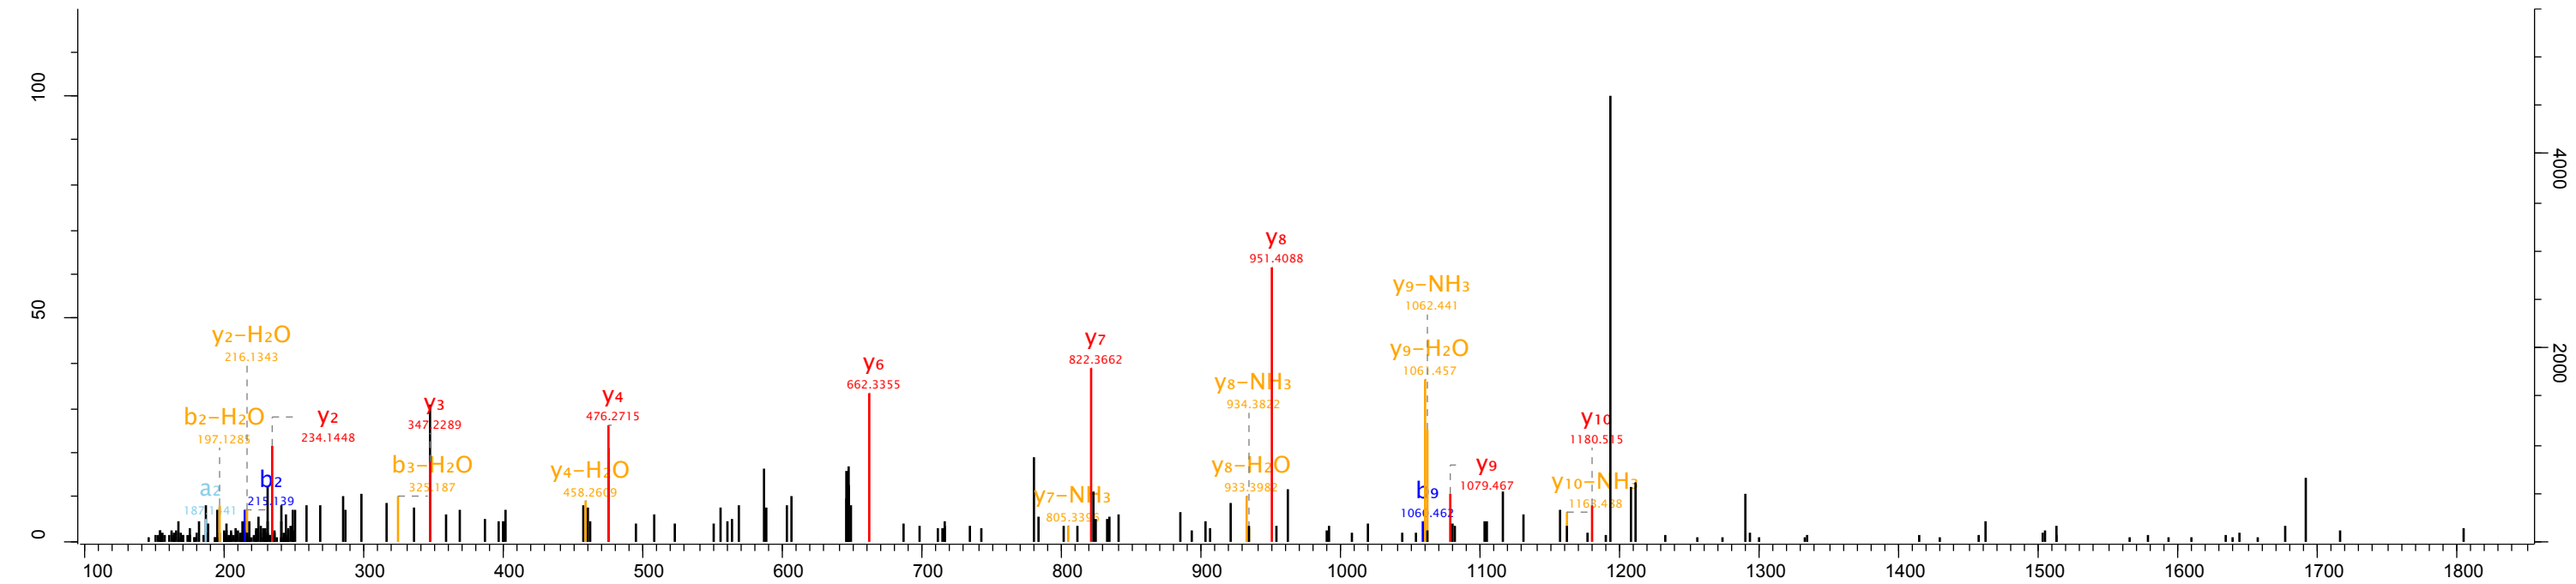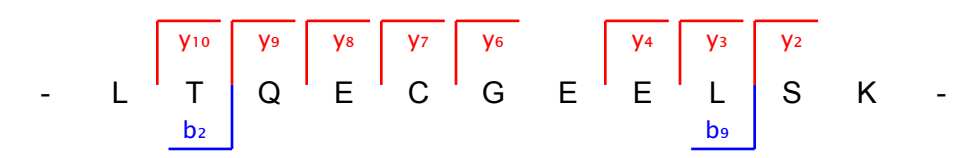

Raw file  
20150307\_Hepa2\_Top\_opt\_D2\_01\_1673

Scan 18476 Method TOF; CID Score 83.5 m/z 664.79 Gene names Mrpl32

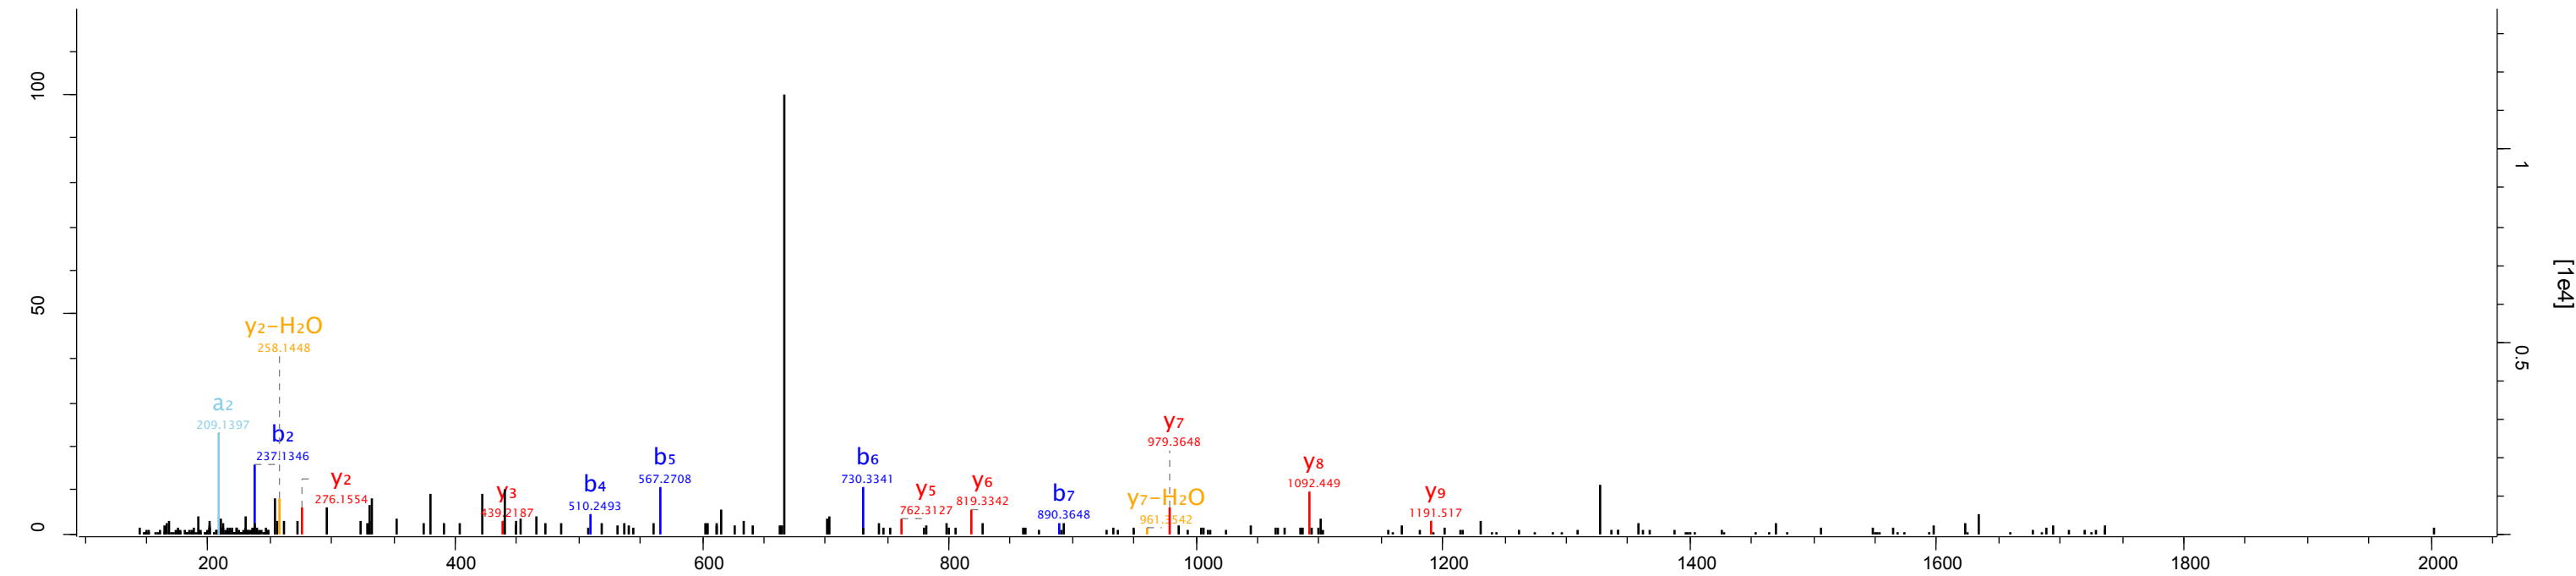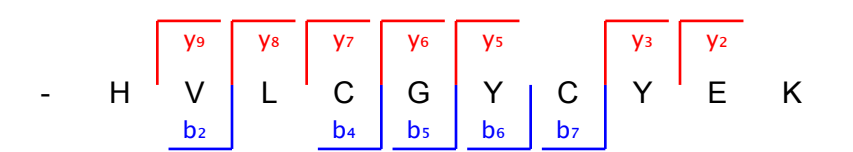

Raw file  
20150307\_Hepa2\_Top\_opt\_D2\_01\_1673

Scan 18658 Method TOF; CID Score 73.5 m/z 551.27 Gene names Fam168a

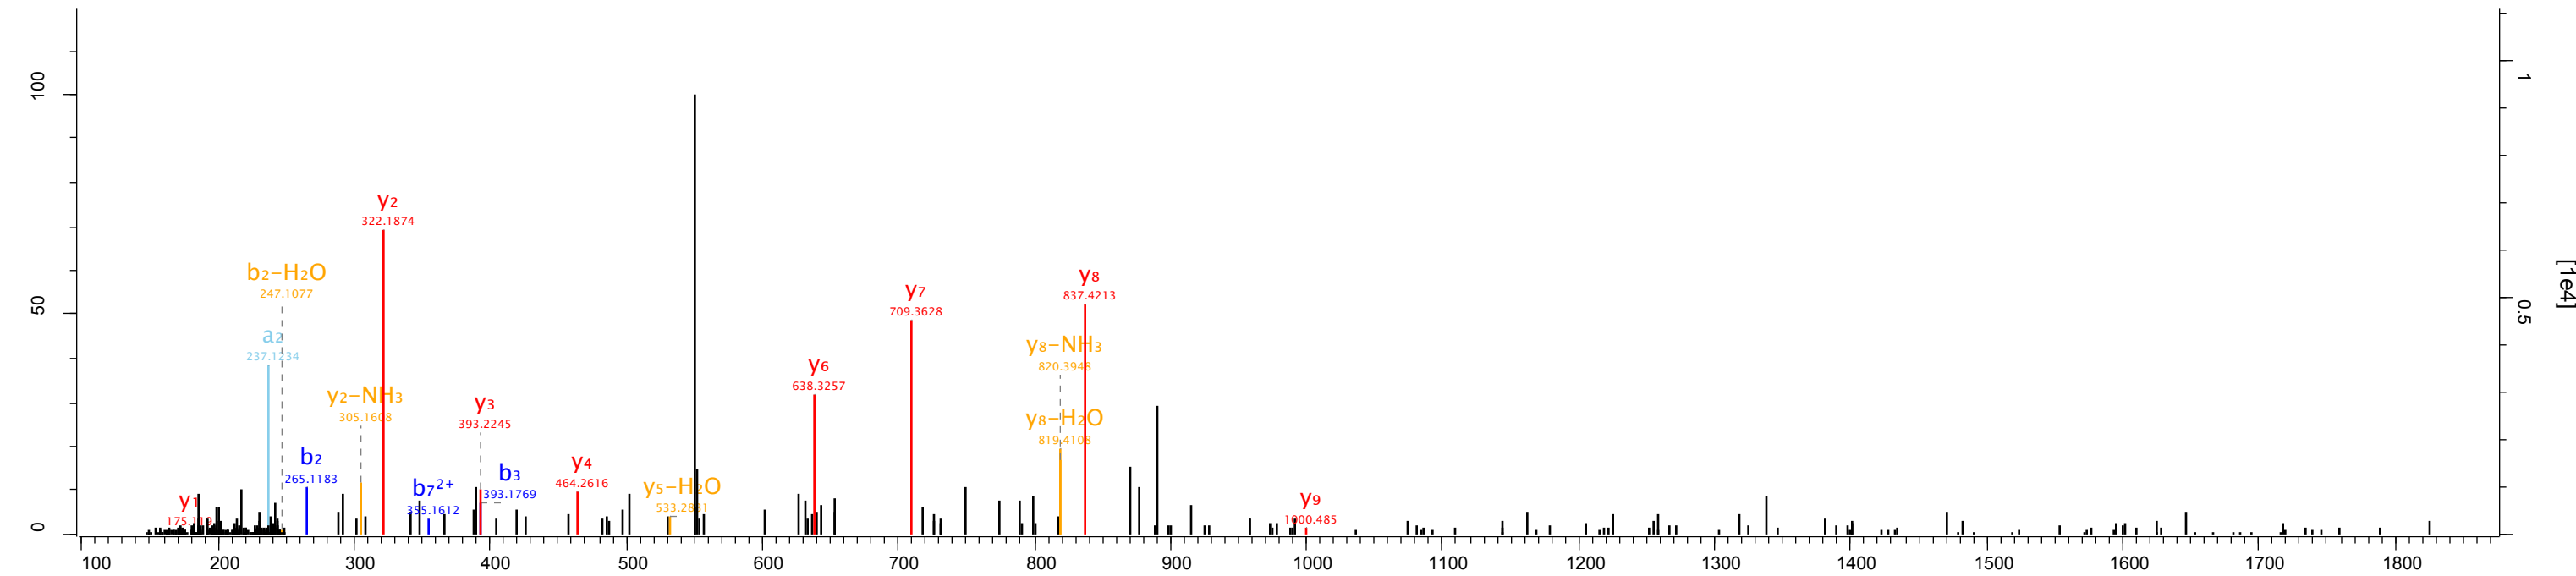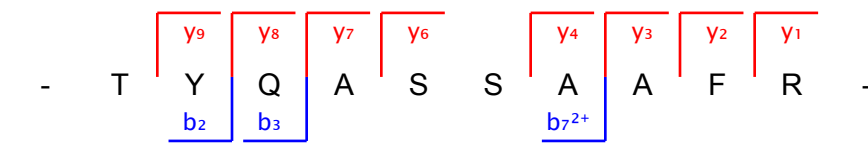

Raw file: 20150307\_Hepa2\_Top\_opt\_D2\_01\_1673  
 Scan: 20411 Method: TOF; CID Score: 44.93 m/z: 579.96 Gene names: Cdh16

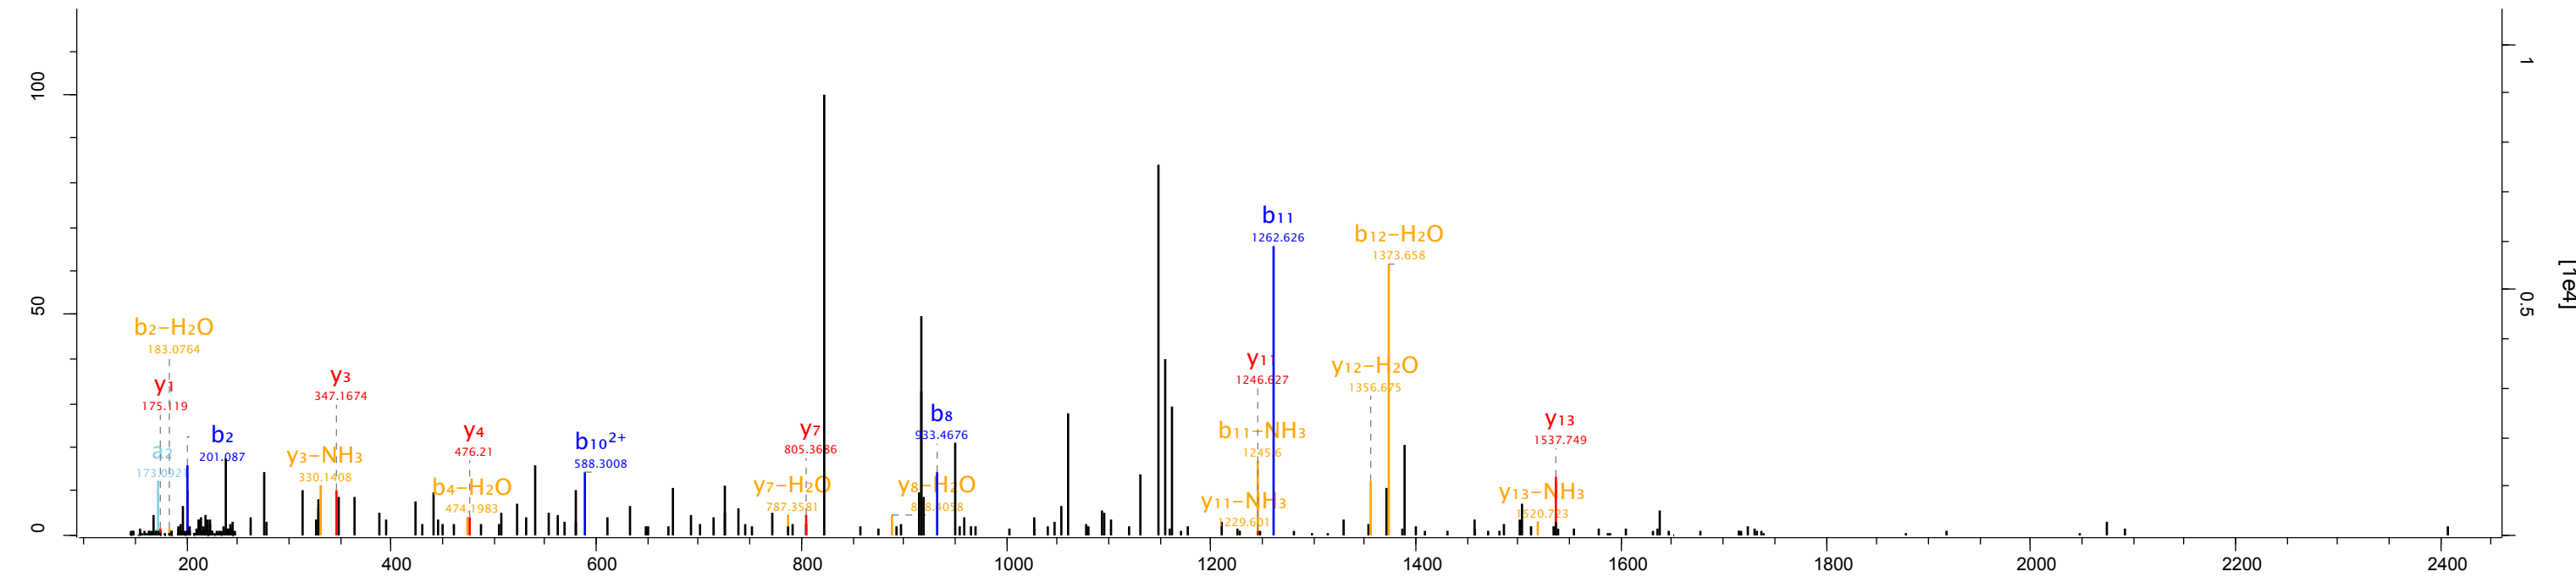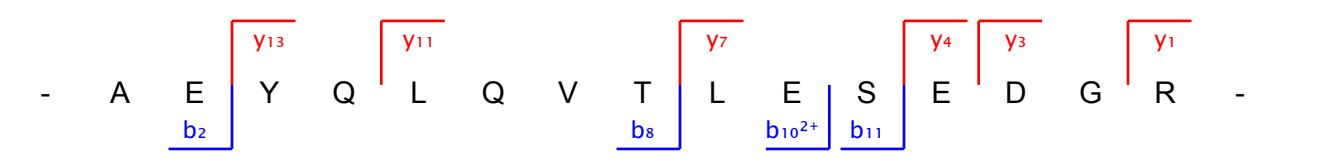



Raw file  
20150307\_Hepa2\_Top\_opt\_D2\_01\_1673

Scan 23176 Method TOF; CID Score 60.55 m/z 634.33 Gene names Ndfip2

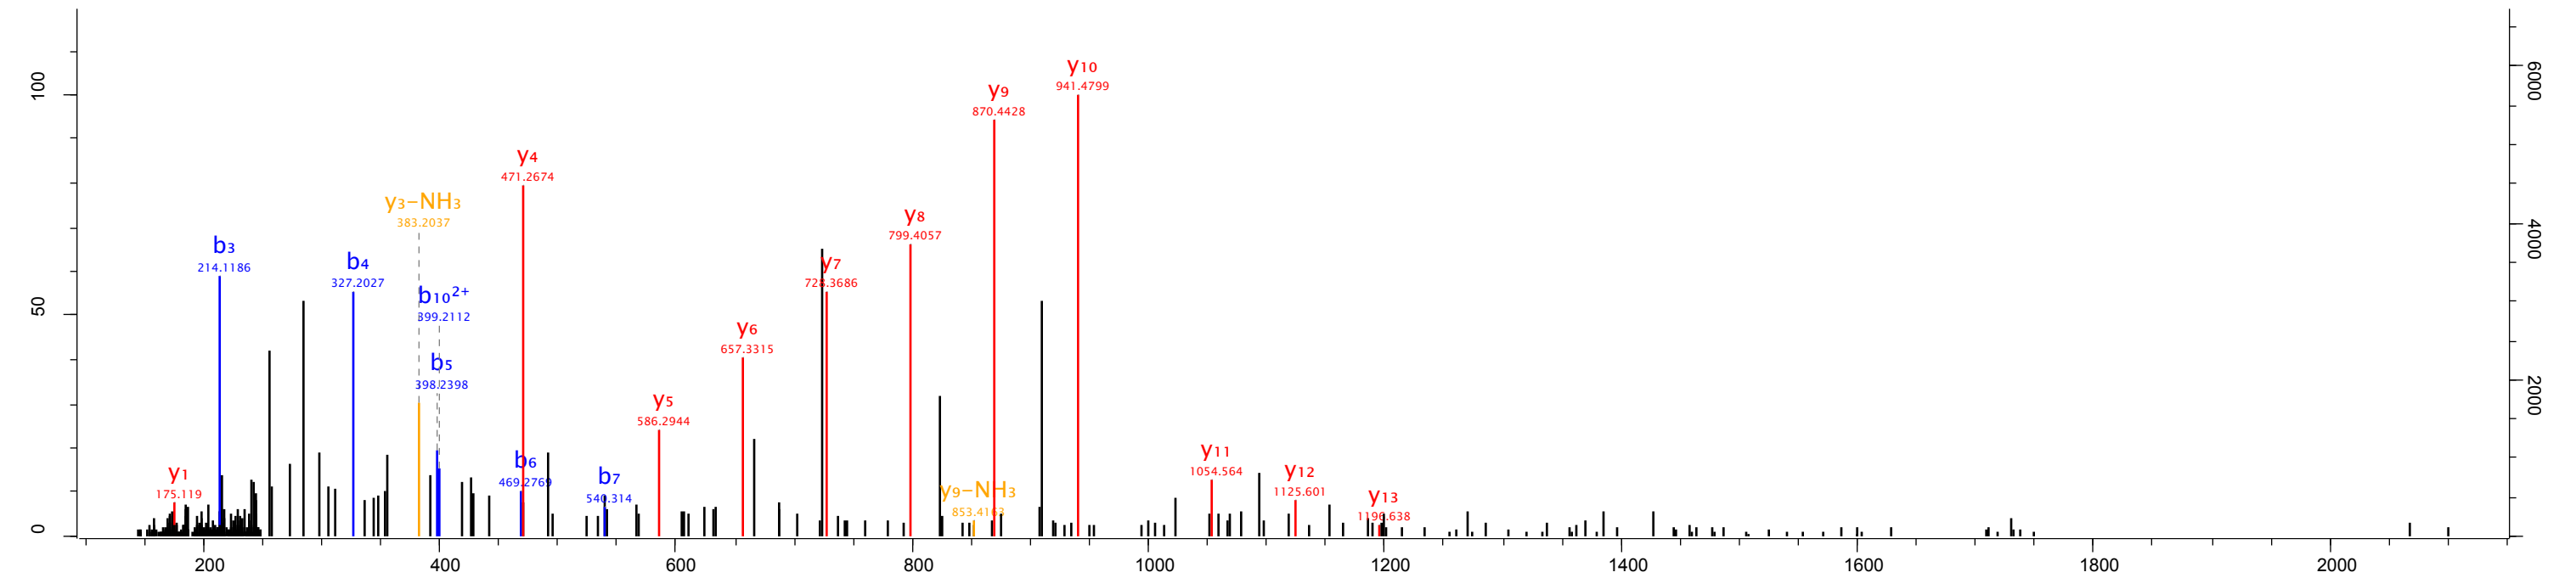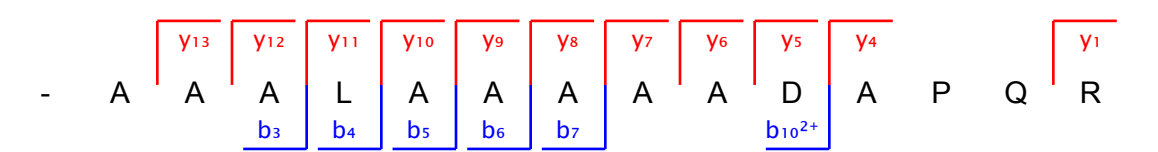

Raw file  
20150307\_Hepa2\_Top\_opt\_D2\_01\_1673

Scan 30900 Method TOF; CID Score 130.29 m/z 834.4 Gene names Ormdl2;Ormdl1

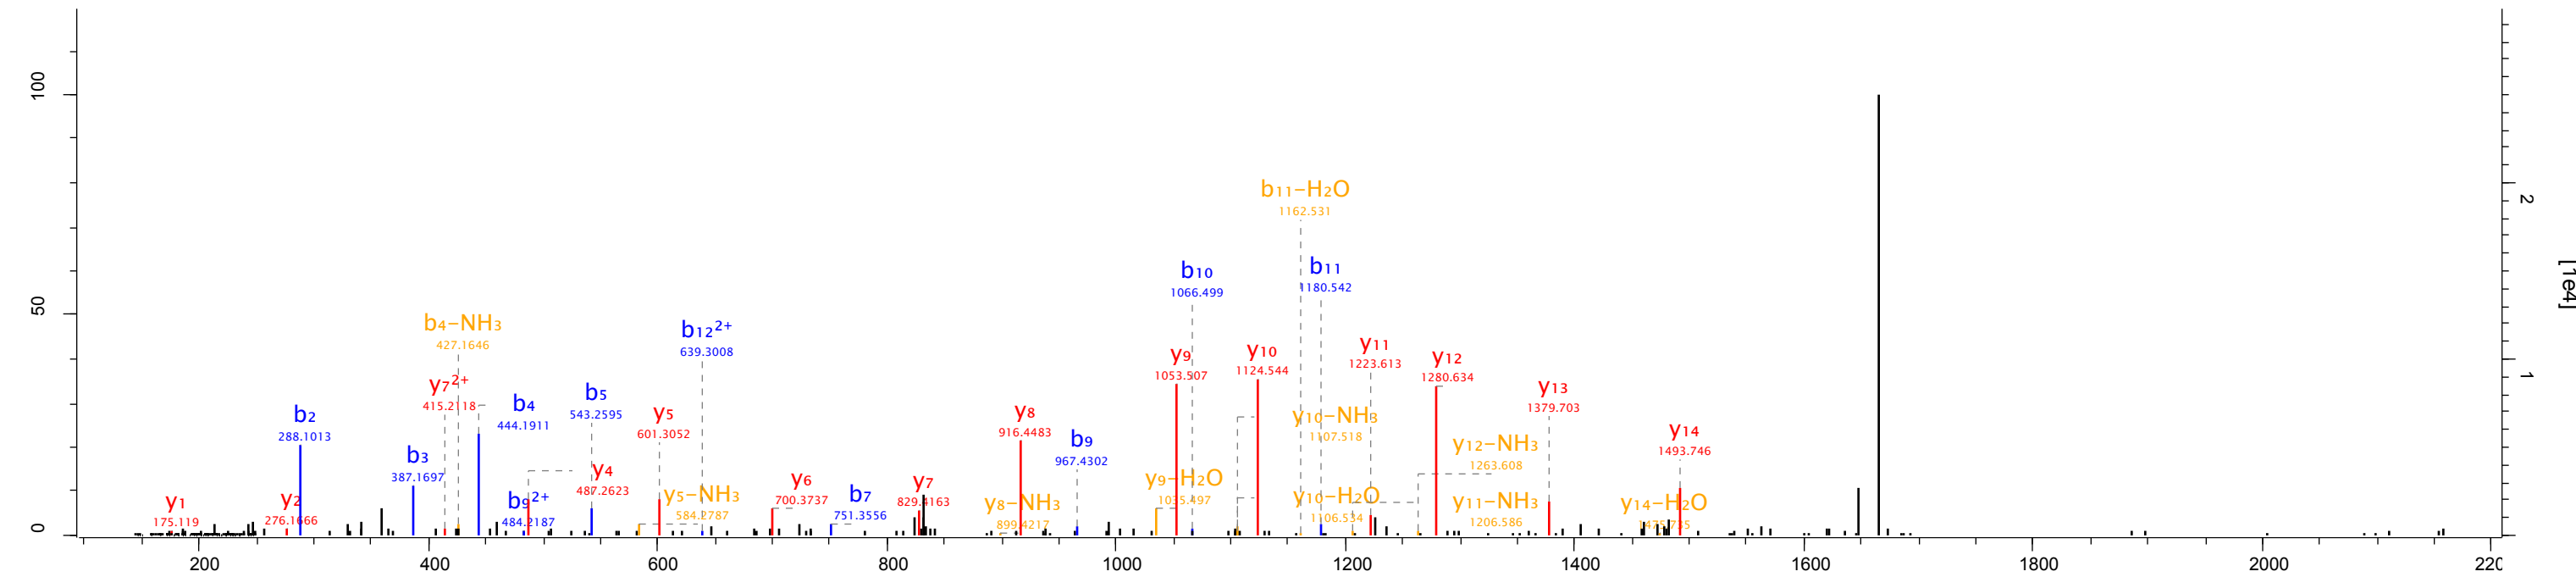

ac  
- M N V G V A H S E V N P N T R -  
b<sub>2</sub> b<sub>3</sub> b<sub>4</sub> b<sub>5</sub> b<sub>7</sub> b<sub>9</sub> b<sub>10</sub> b<sub>11</sub> b<sub>12</sub><sup>2+</sup>

Raw file 20150307\_Hepa2\_Top\_opt\_D2\_01\_1673 Scan 31870 Method TOF; CID Score 72.43 m/z 634.77 Gene names Slc11a2

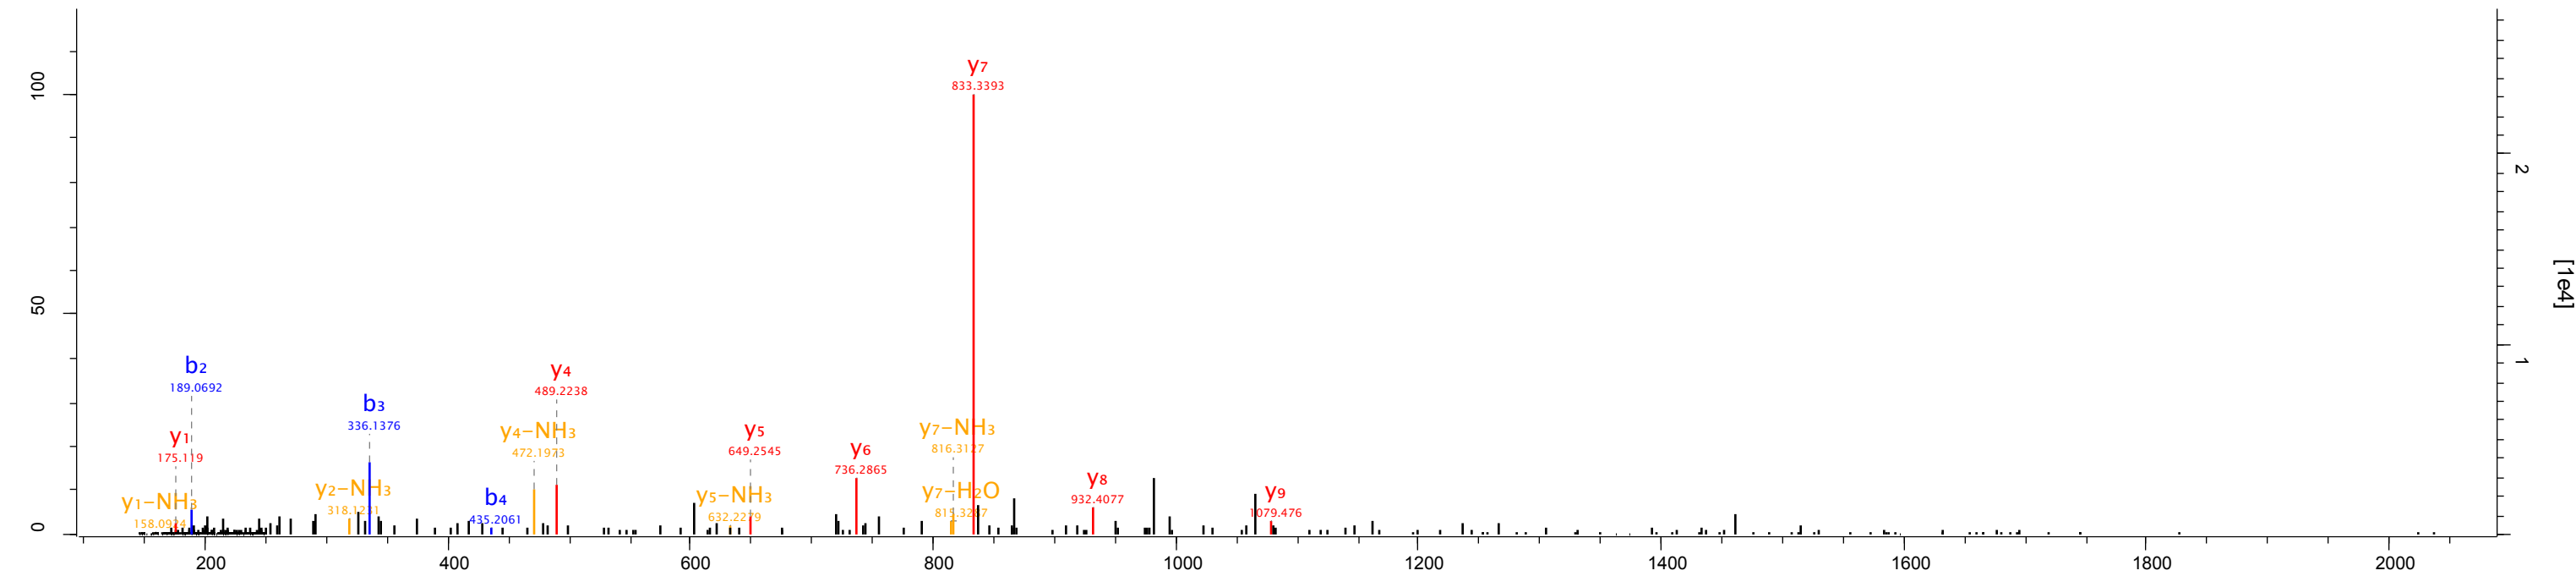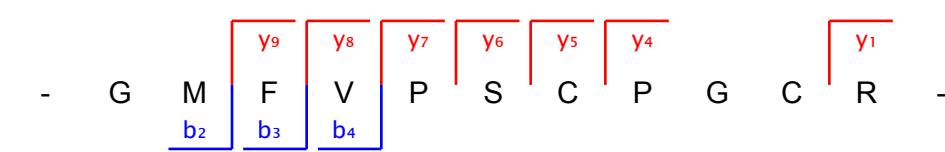

Raw file 20150307\_Hepa2\_Top\_opt\_D2\_01\_1673 Scan 33326 Method TOF; CID Score 73.88 m/z 706.31 Gene names Mgst1

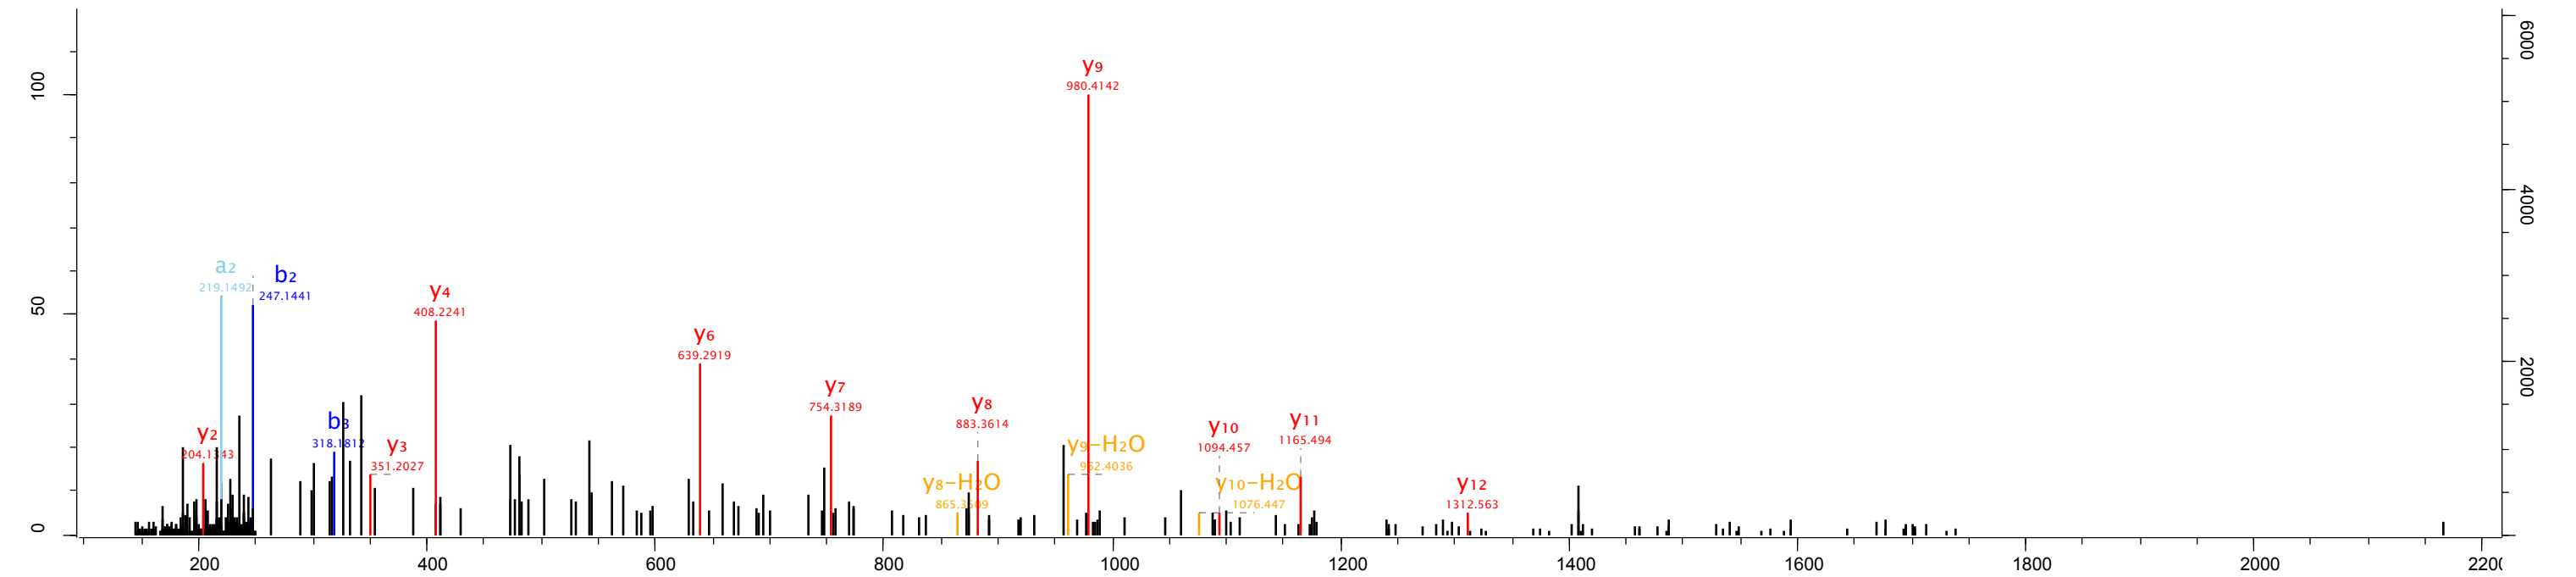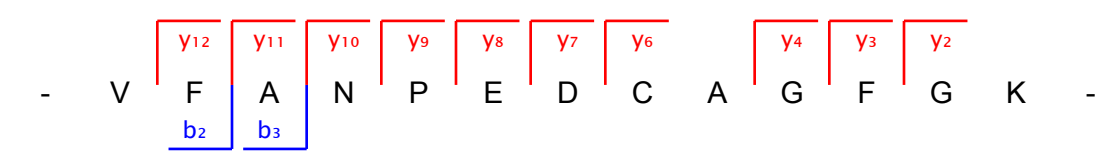

Raw file: 20150307\_Hepa2\_Top\_opt\_D2\_01\_1673  
 Scan: 37446 Method: TOF; CID Score: 61.65 m/z: 736.39 Gene names: St6gal1

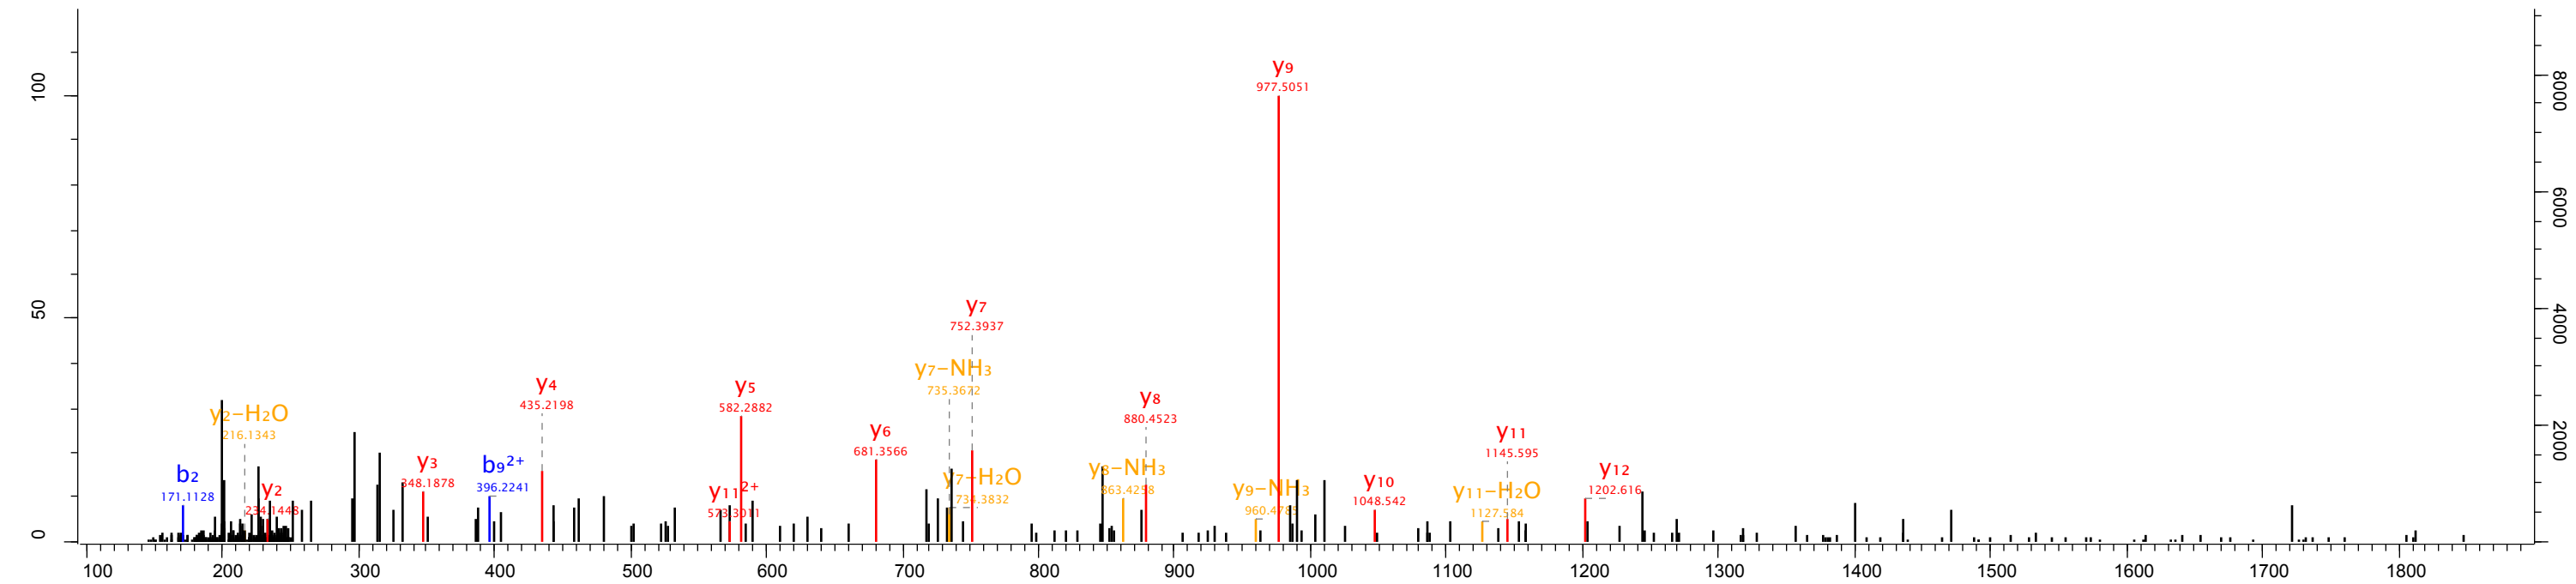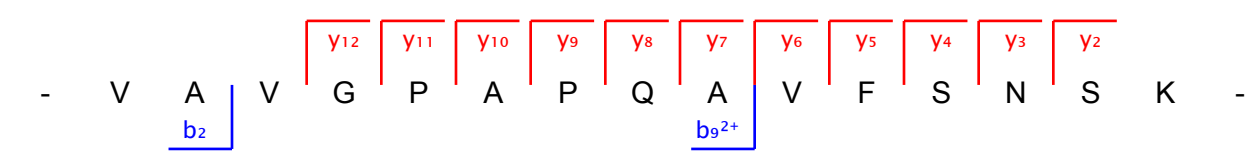

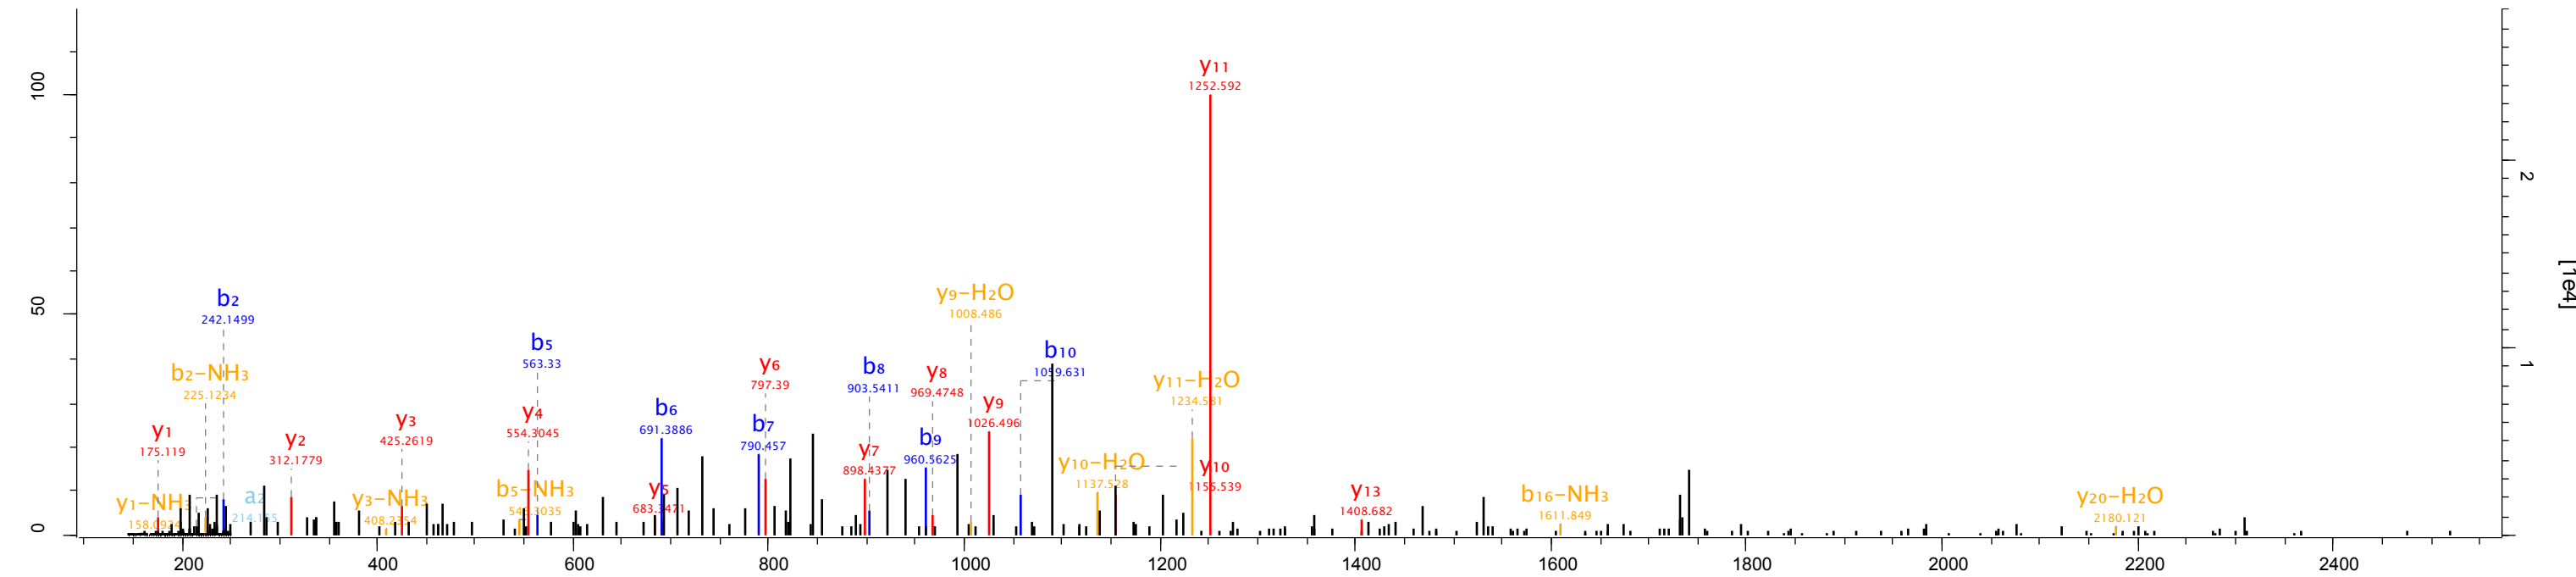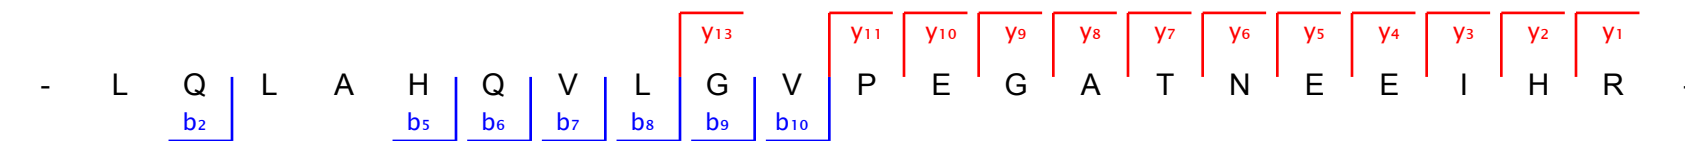

Raw file 20150307\_Hepa2\_Top\_opt\_D2\_01\_1673 Scan 42094 Method TOF; CID Score 62.83 m/z 965.79 Gene names Trim44

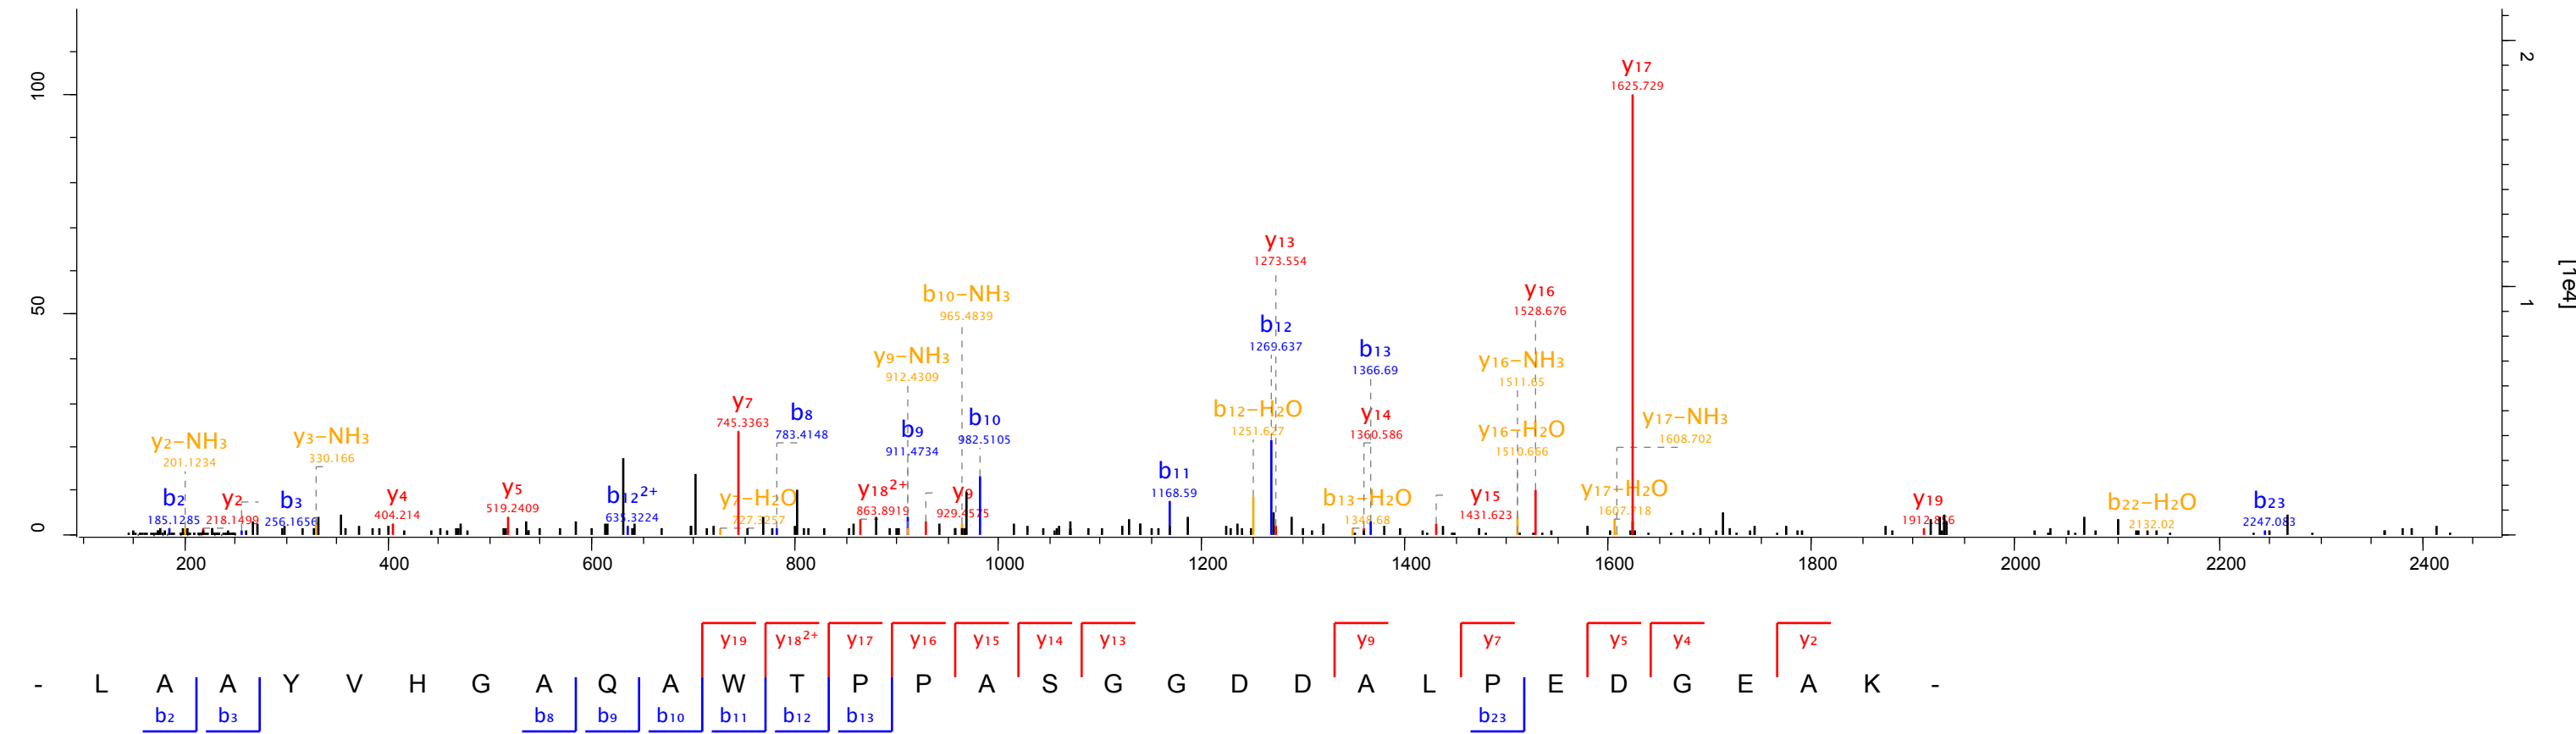

Raw file 20150307\_Hepa2\_Top\_opt\_D2\_01\_1673 Scan 43113 Method TOF; CID Score 56.78 m/z 942.1 Gene names Polr3h

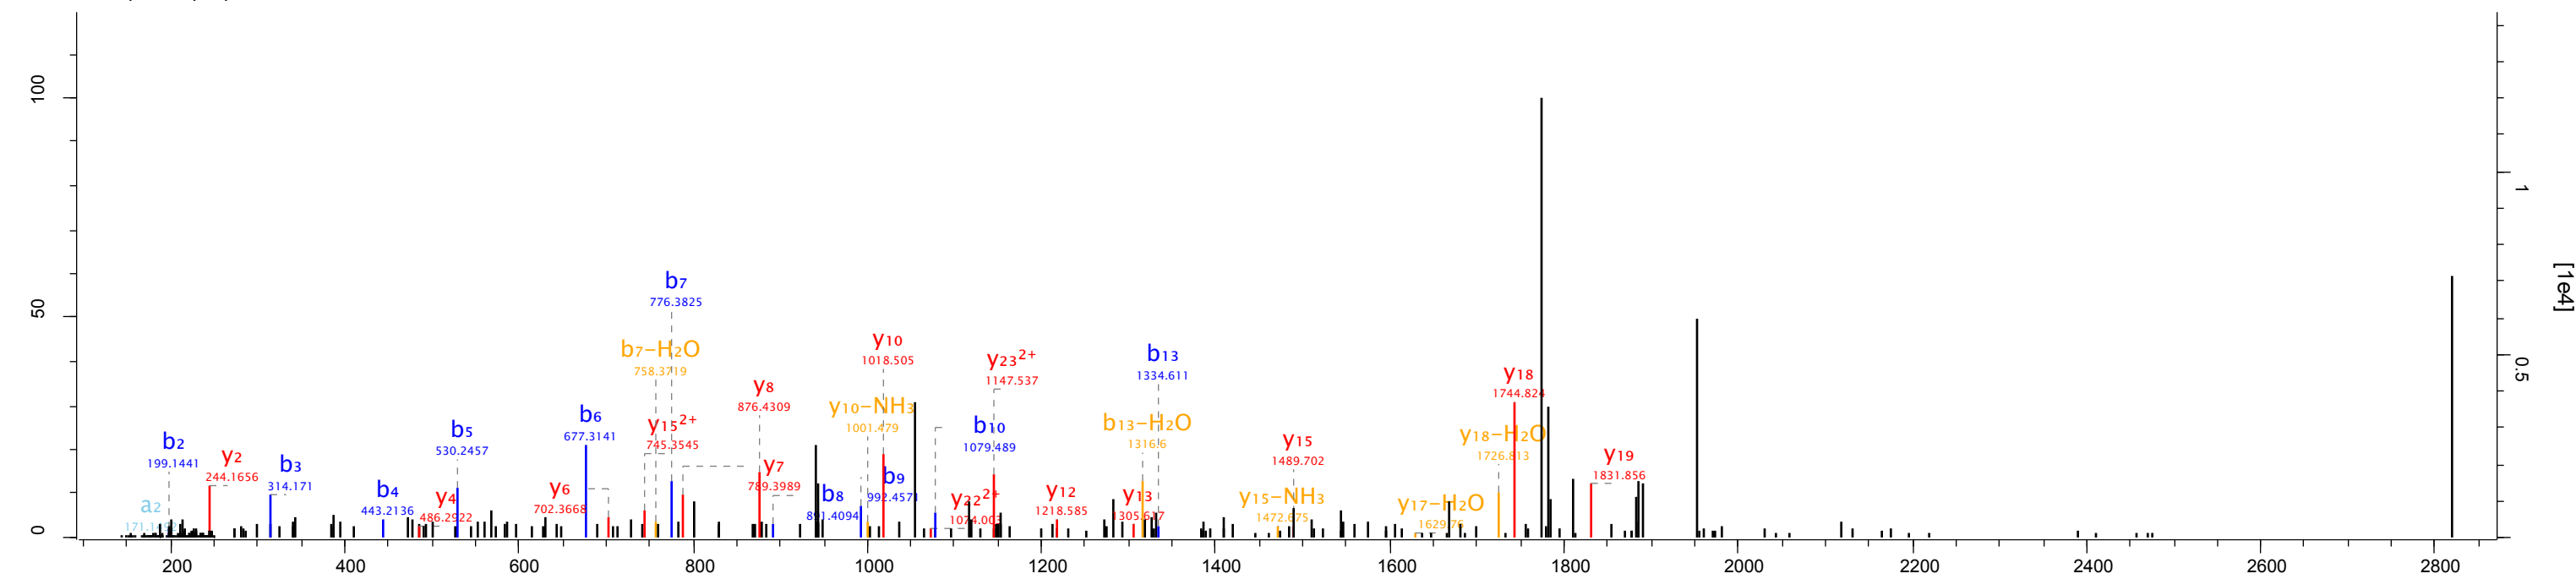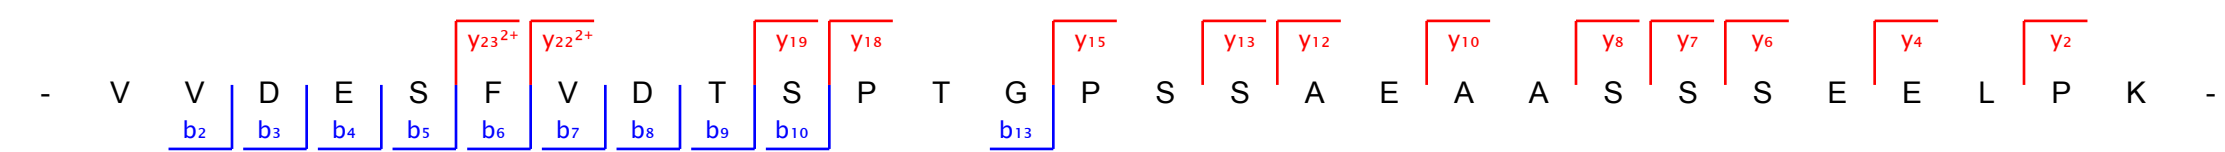



Raw file 20150307\_Hepa2\_Top\_opt\_D2\_01\_1673 Scan 44228 Method TOF; CID Score 57.29 m/z 587.34 Gene names Slc30a6

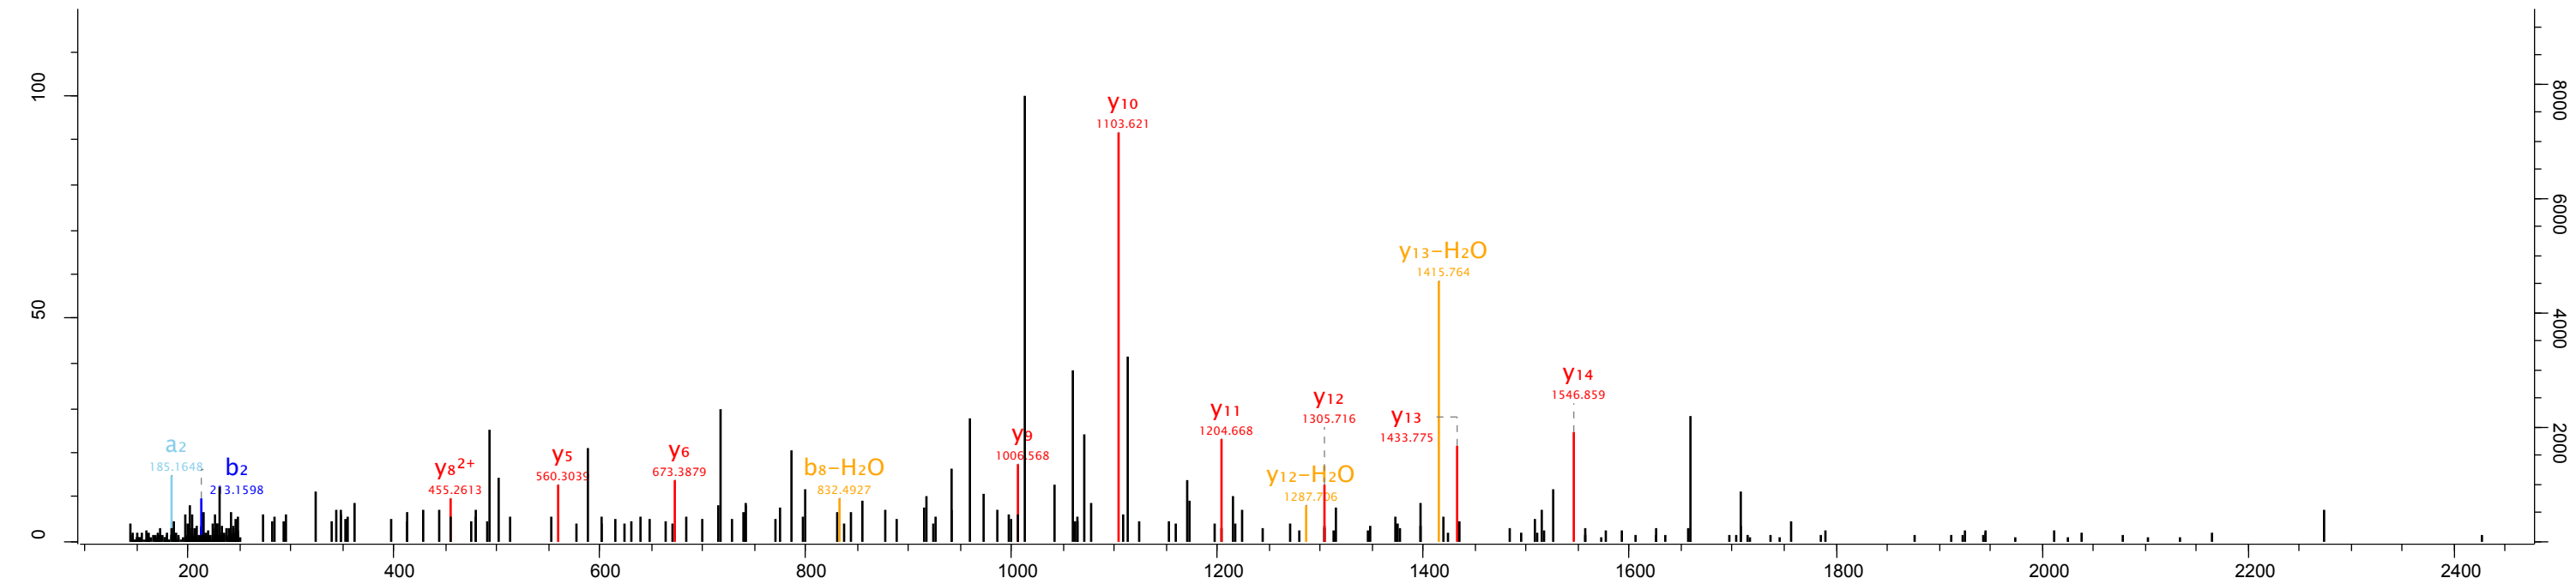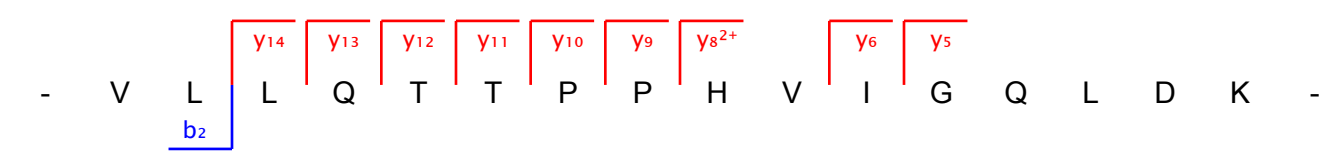

Raw file 20150307\_Hepa2\_Top\_opt\_D2\_01\_1673 Scan 44592 Method TOF; CID Score 49.66 m/z 780.15 Gene names Hyal2

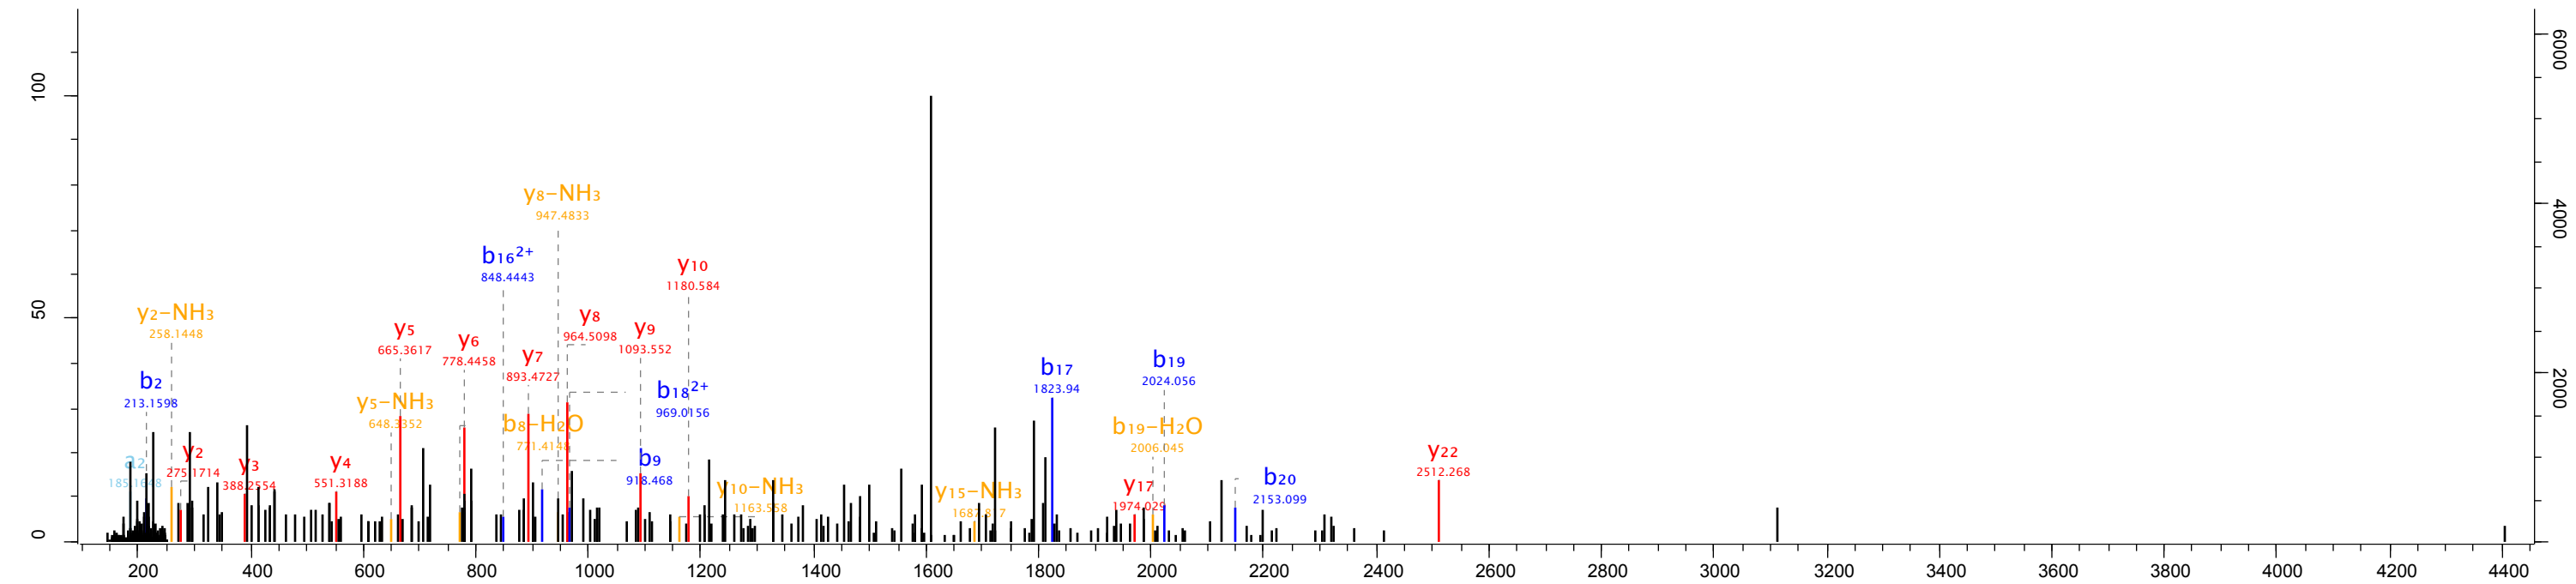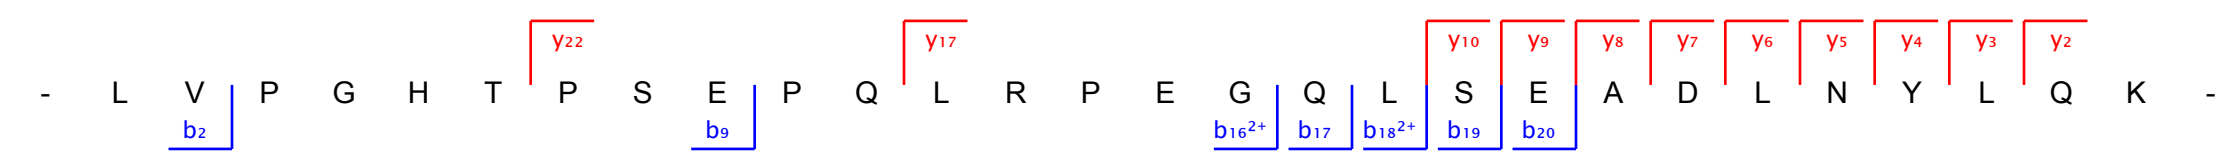

Raw file  
20150307\_Hepa2\_Top\_opt\_D2\_01\_1673

Scan 47037 Method TOF; CID Score 69.07 m/z 902.46 Gene names Phrf1

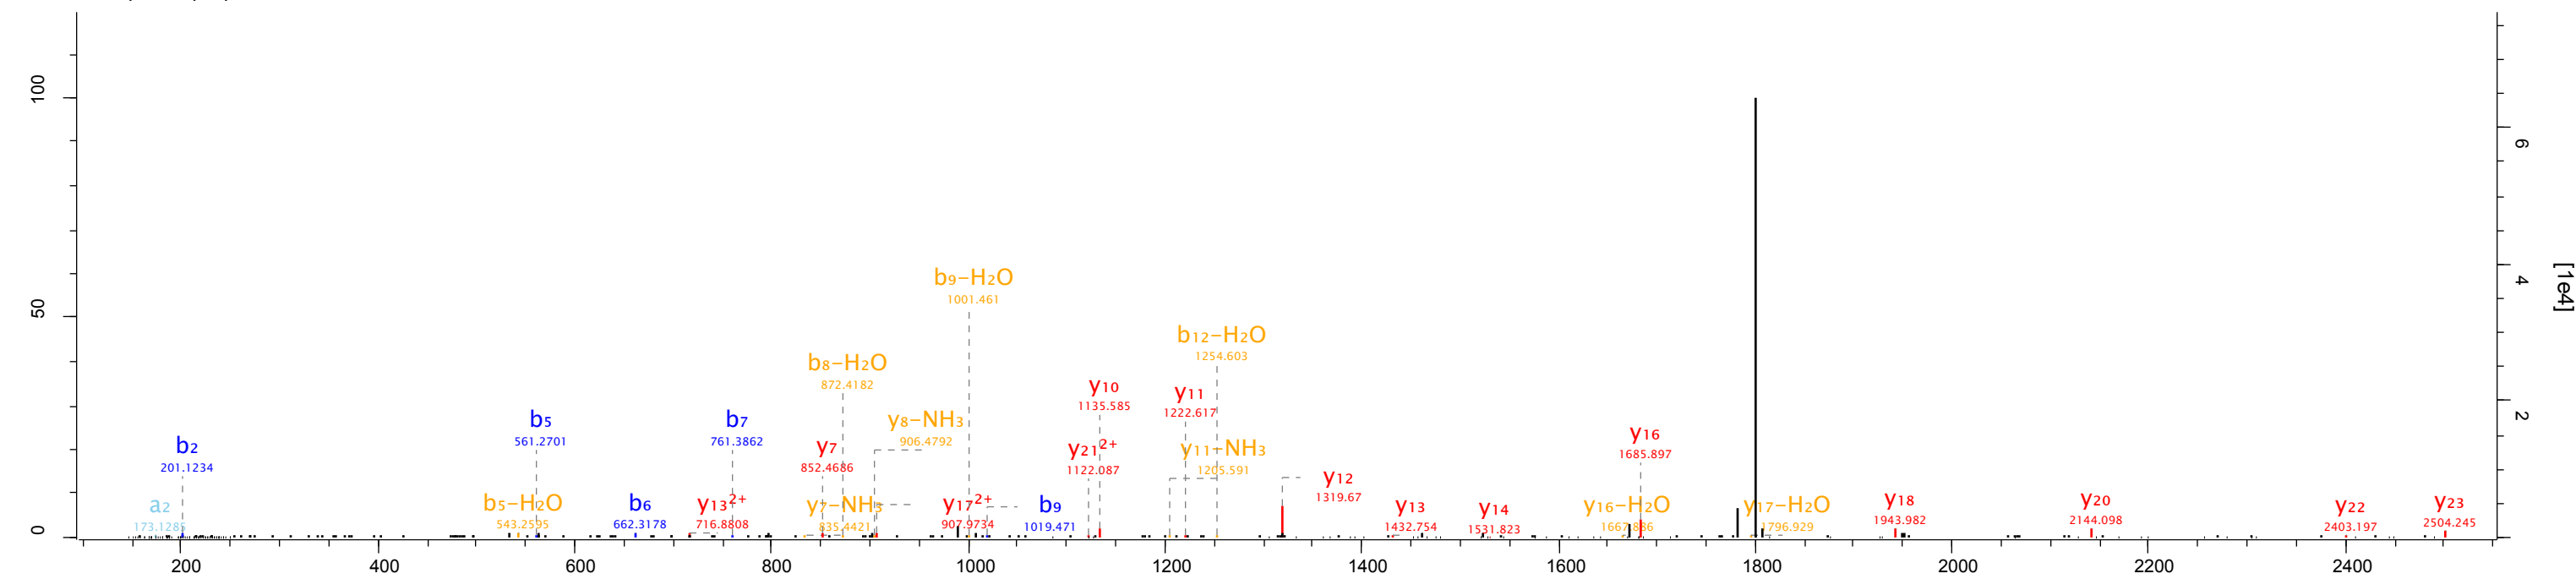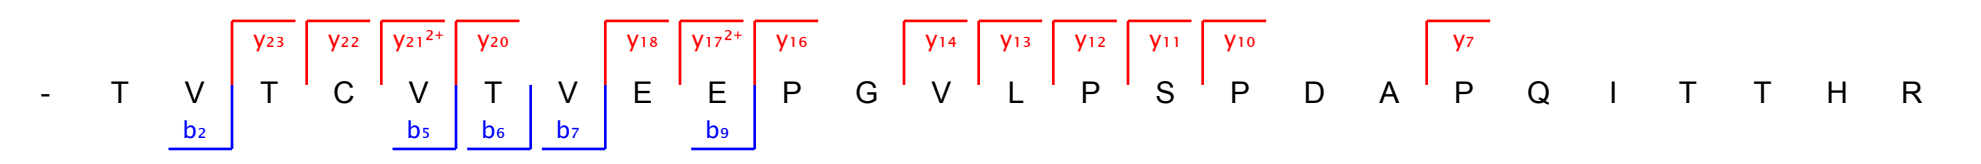

Raw file 20150307\_Hepa2\_Top\_opt\_D2\_01\_1673 Scan 50610 Method TOF; CID Score 51.03 m/z 828.42 Gene names Nme7

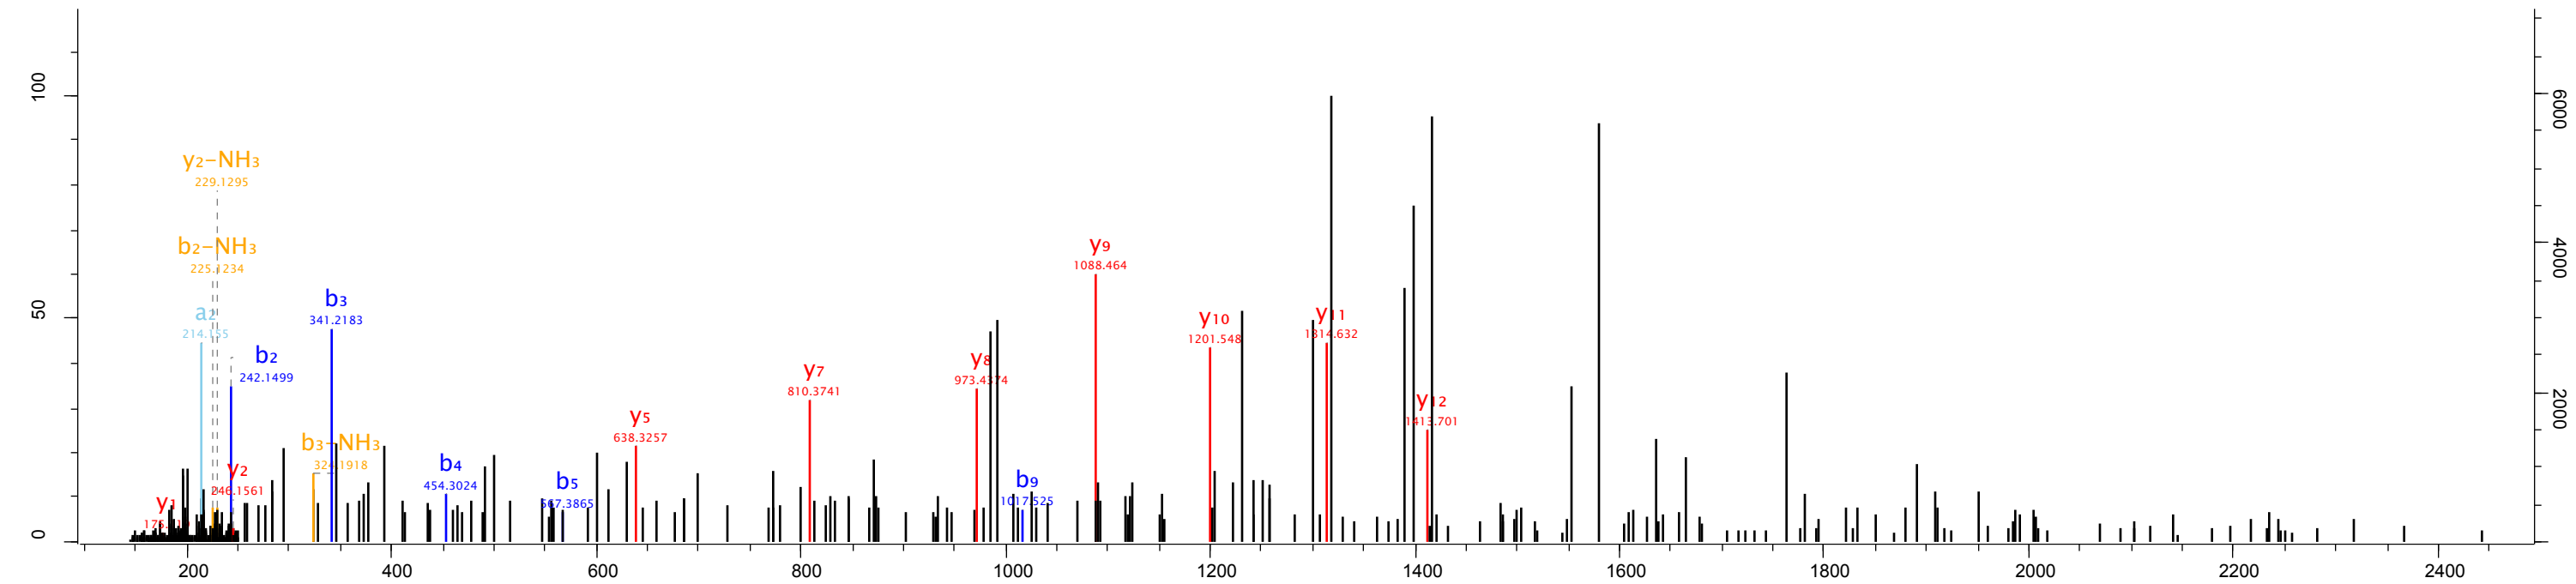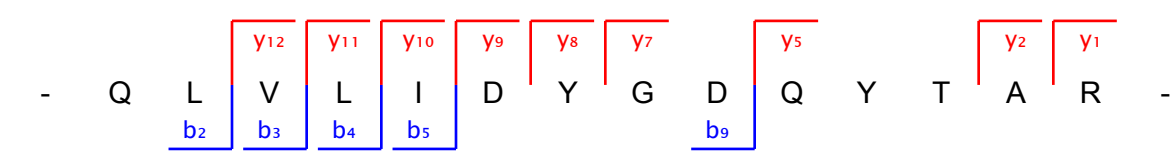

Raw file 20150307\_Hepa2\_Top\_opt\_D2\_01\_1673 Scan 52325 Method TOF; CID Score 51.77 m/z 748.9 Gene names Mgst2

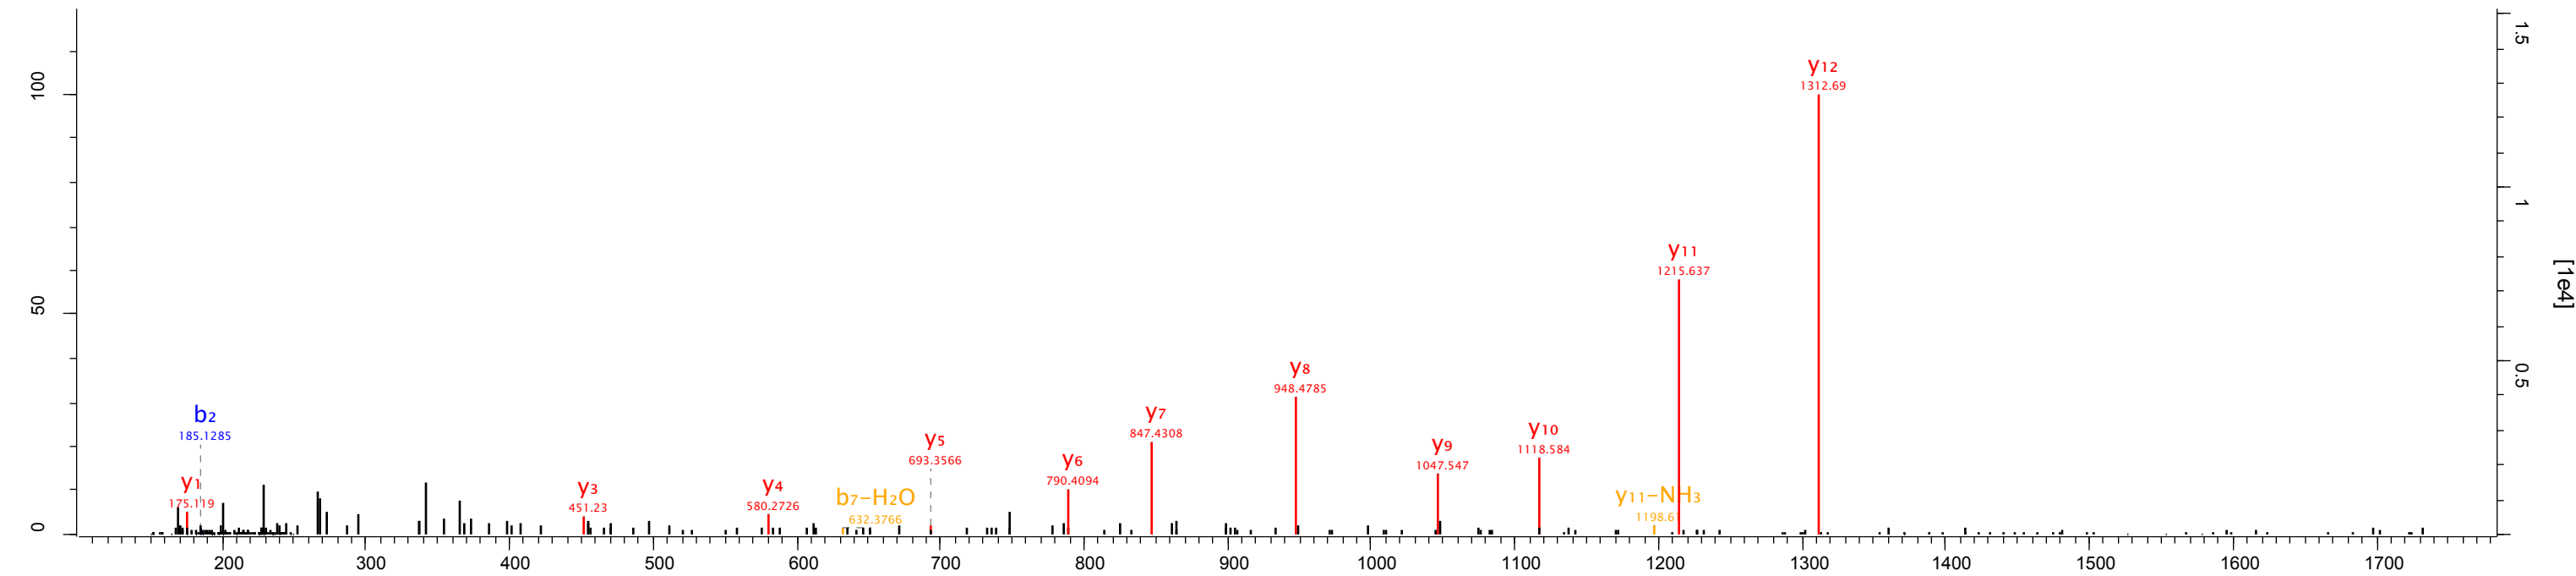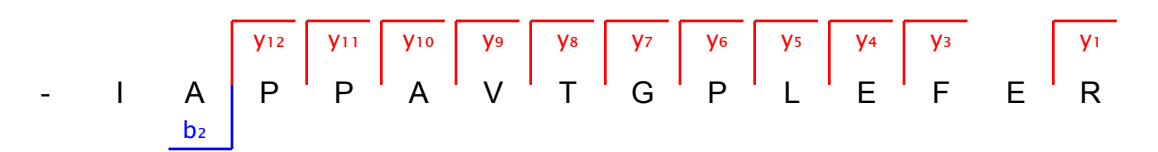

Raw file  
20150307\_Hepa2\_Top\_opt\_D2\_01\_1673

Scan 52801 Method TOF; CID Score 57.21 m/z 799.38 Gene names Ndfip1

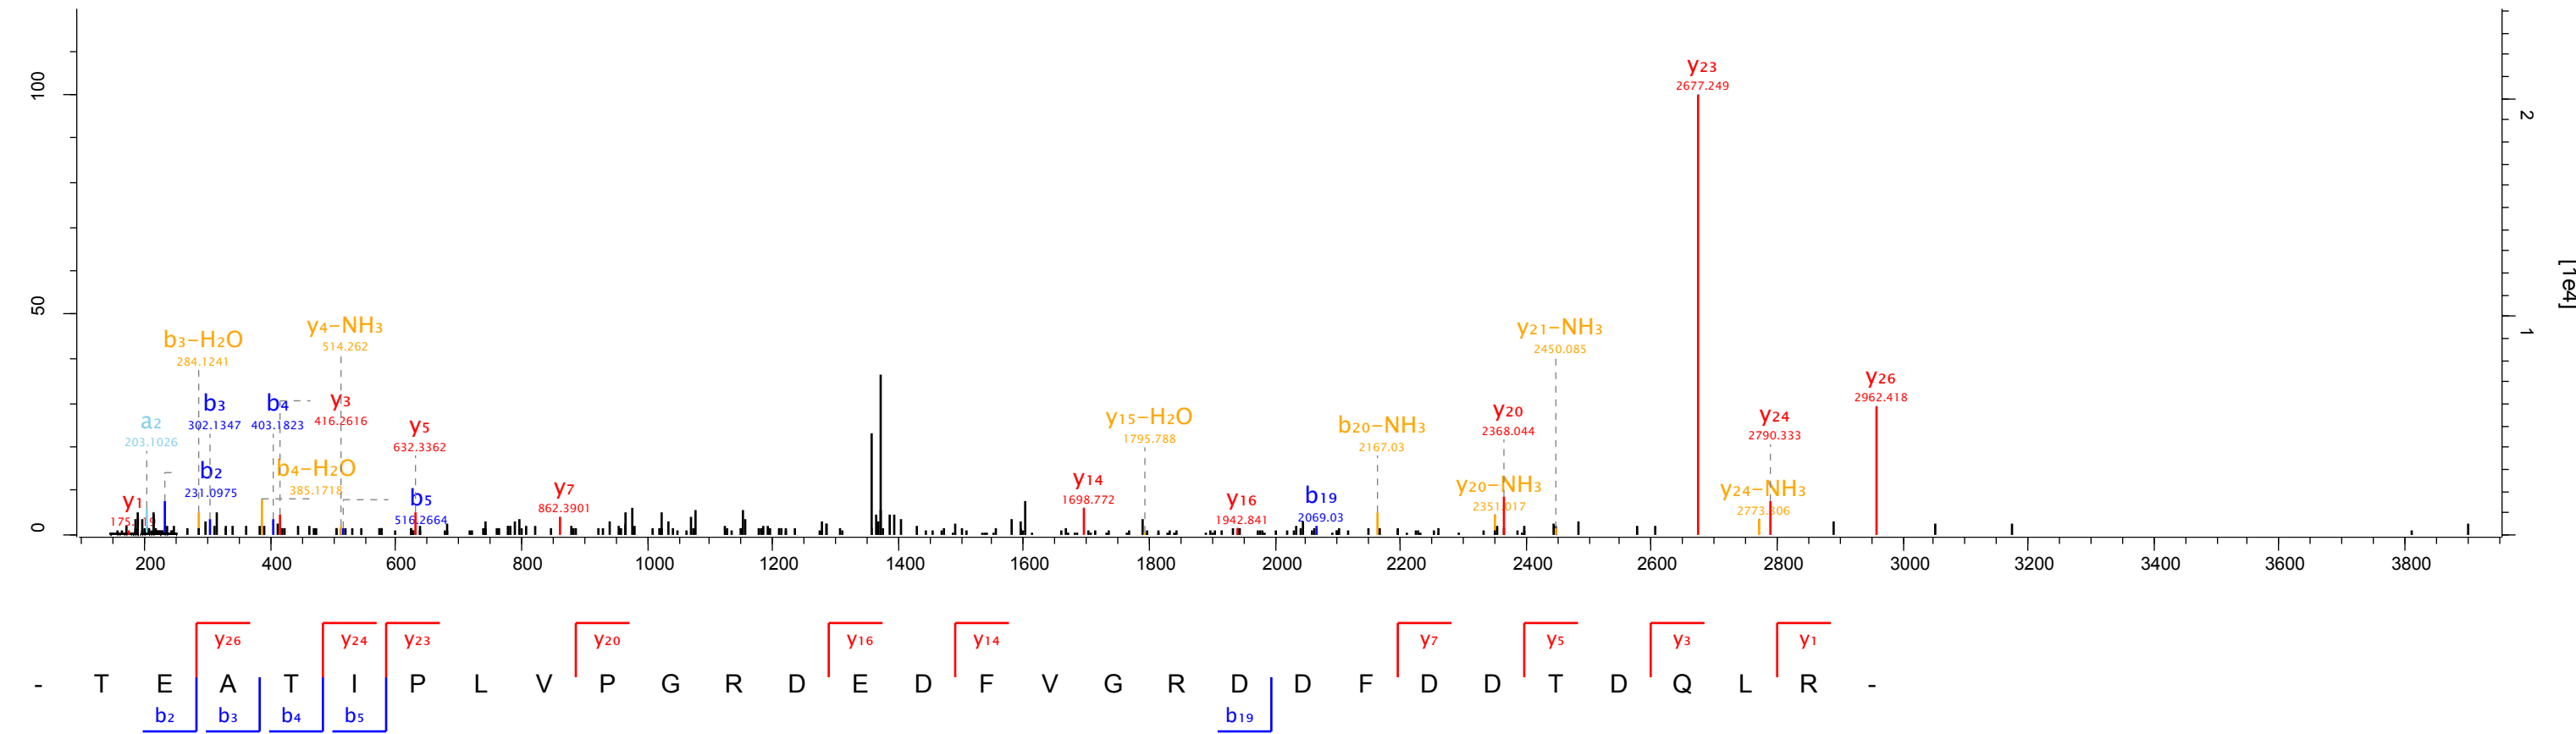

Raw file: 20150307\_Hepa2\_Top\_opt\_D2\_01\_1673  
 Scan: 54029 Method: TOF; CID Score: 56.12 m/z: 659.35 Gene names: Ngly1

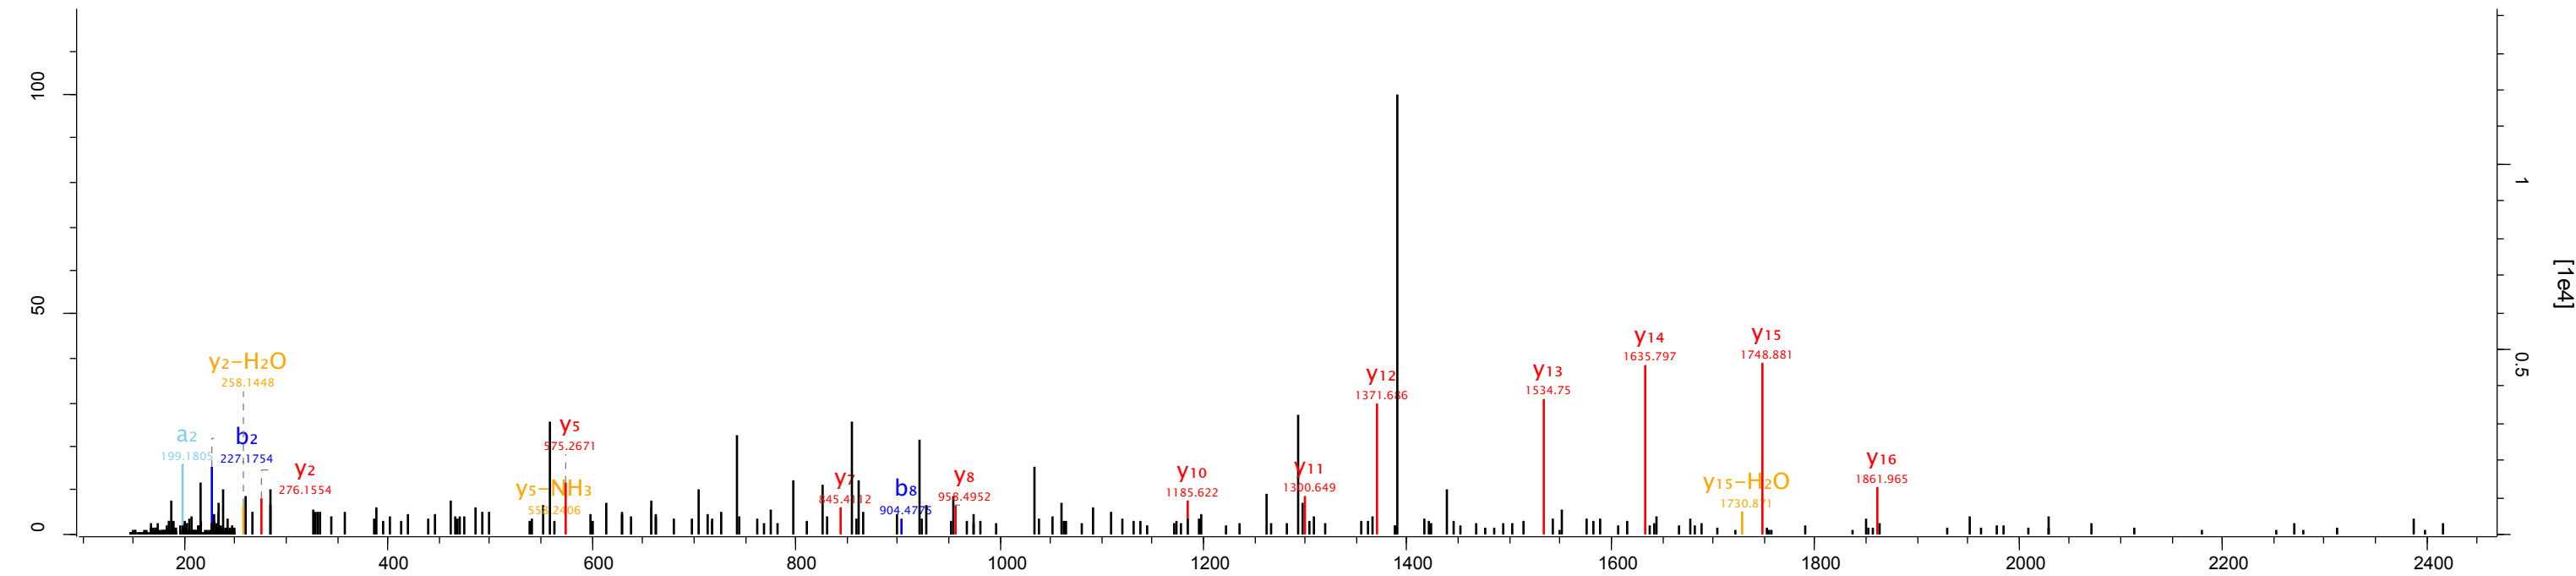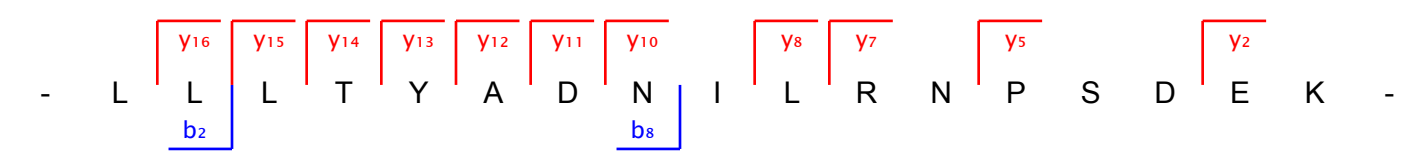

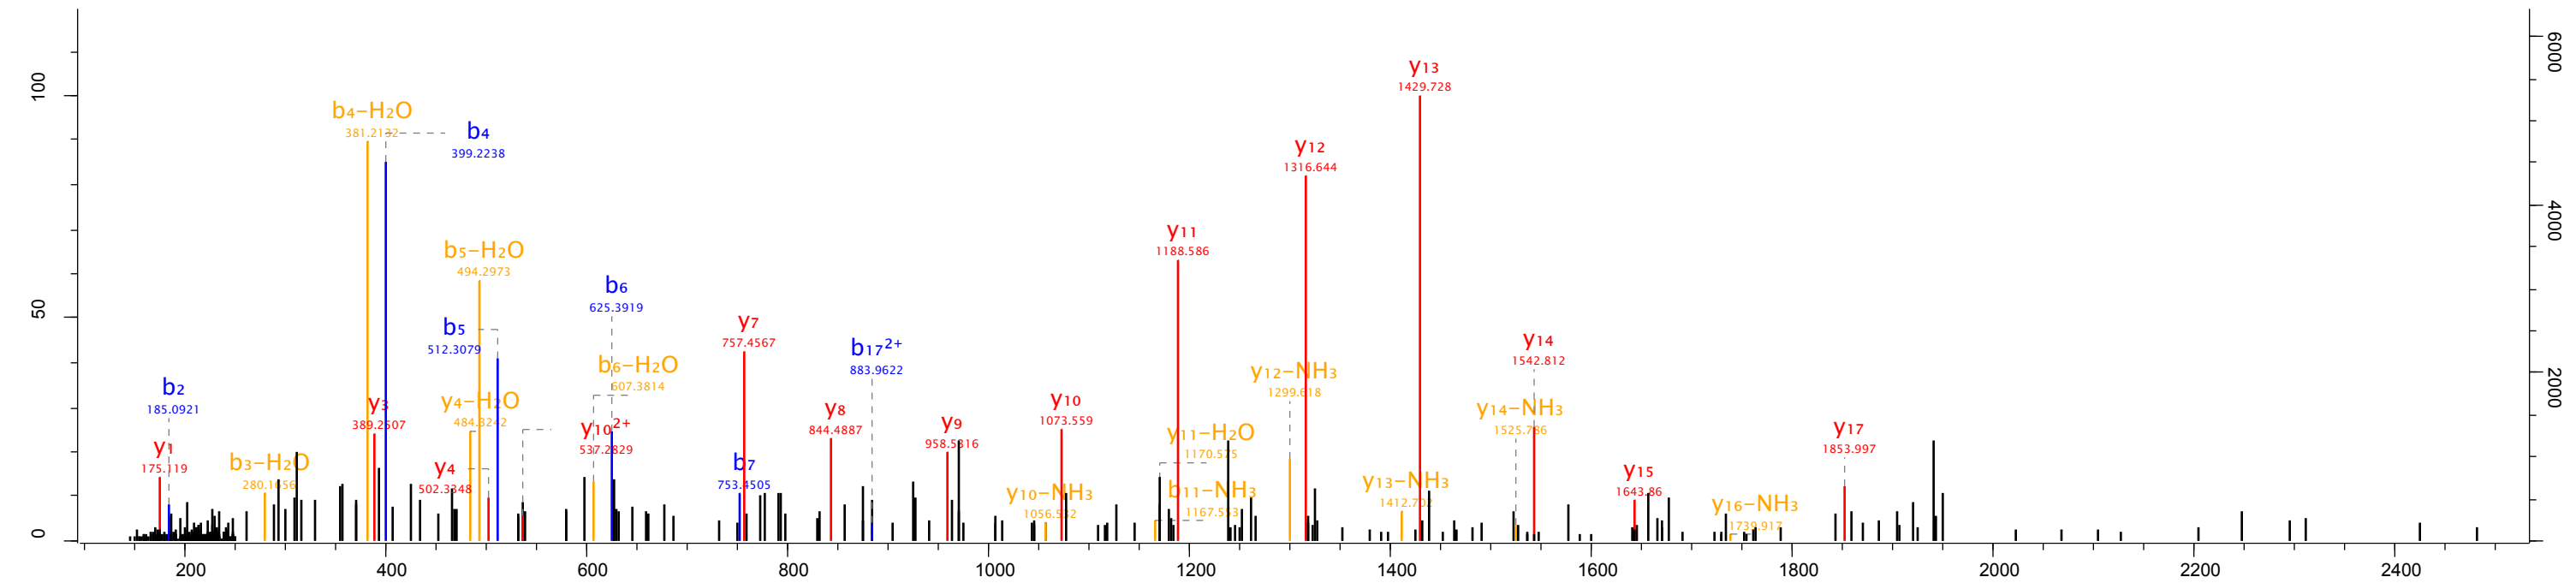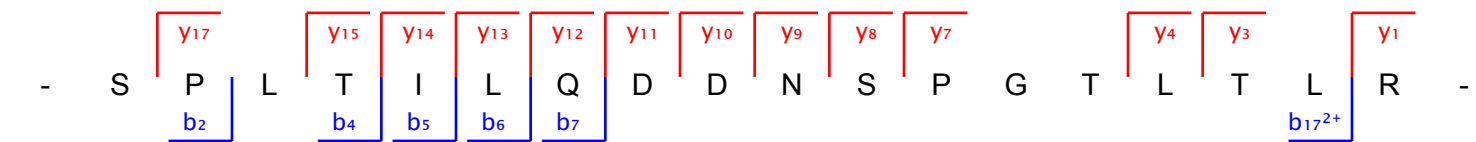



Raw file 20150307\_Hepa2\_Top\_opt\_D2\_01\_1673 Scan 59212 Method TOF; CID Score 47.92 m/z 917.46 Gene names Nth1

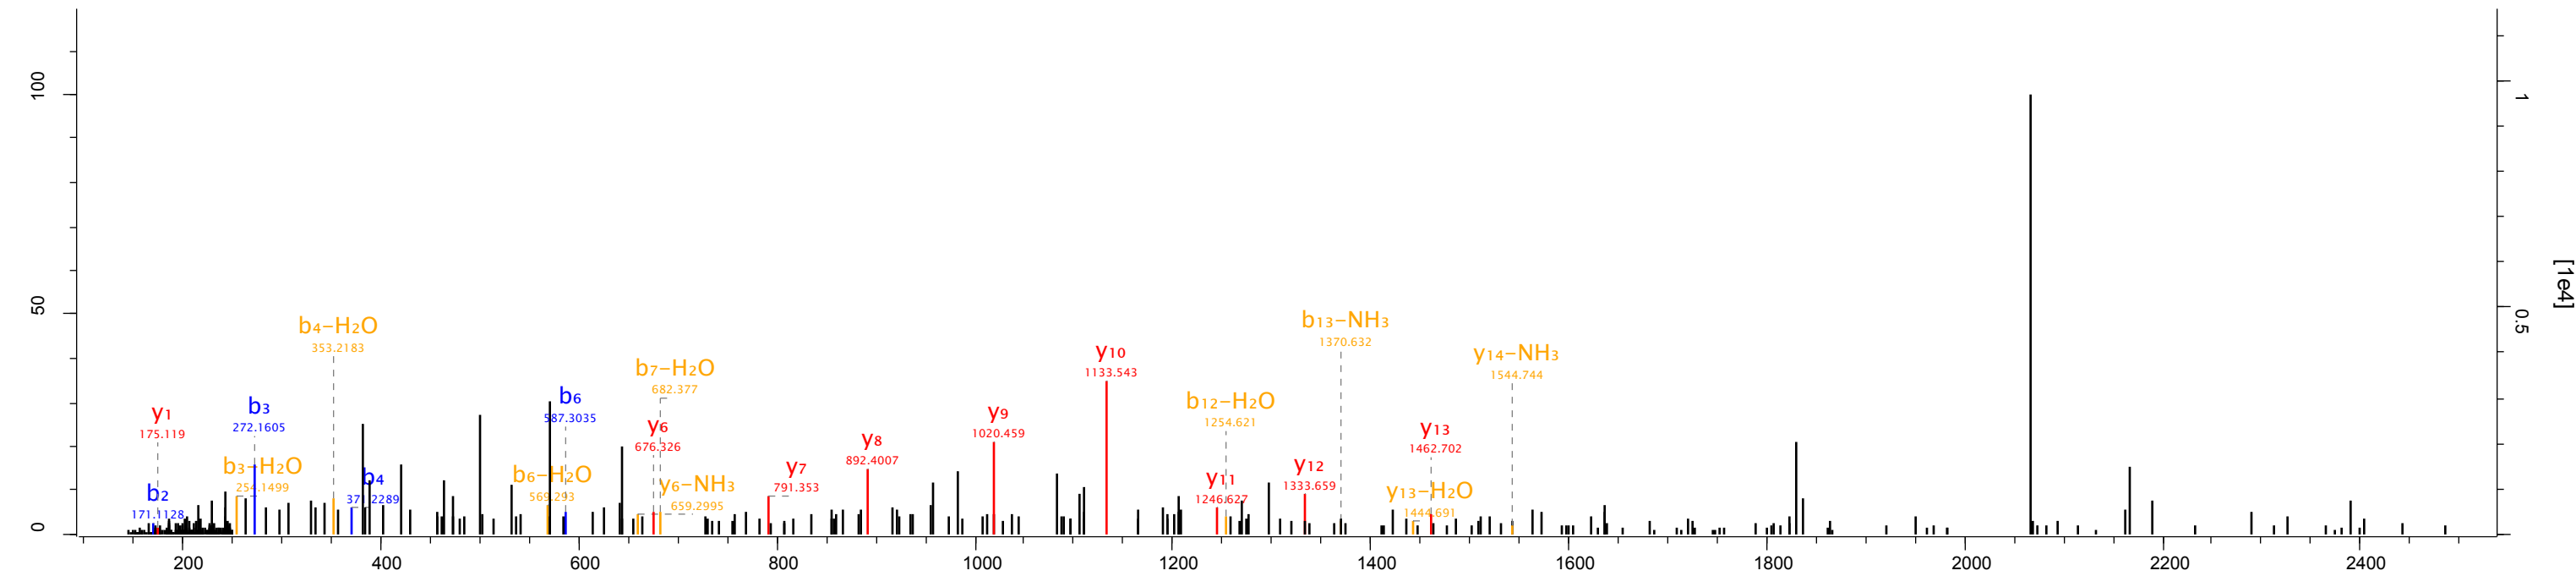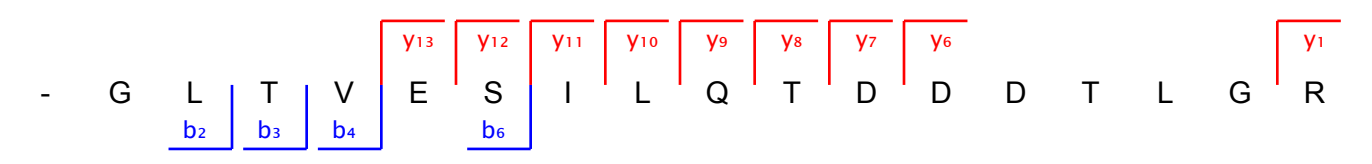

Raw file 20150307\_Hepa2\_Top\_opt\_D2\_01\_1673 Scan 59859 Method TOF; CID Score 51.77 m/z 783.41 Gene names Gemin8

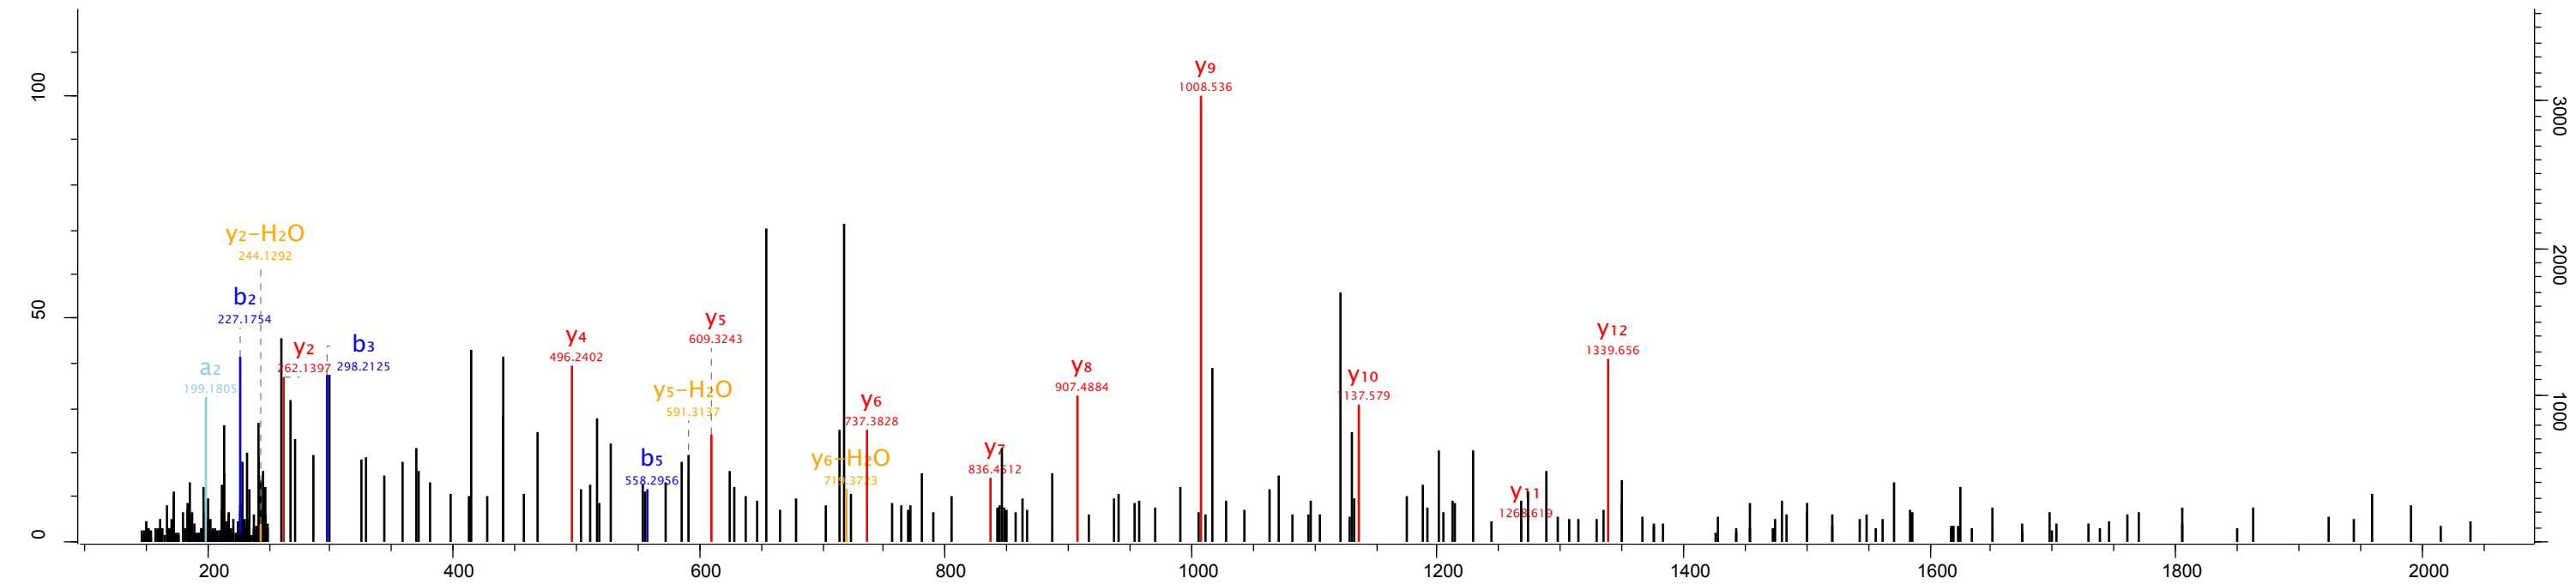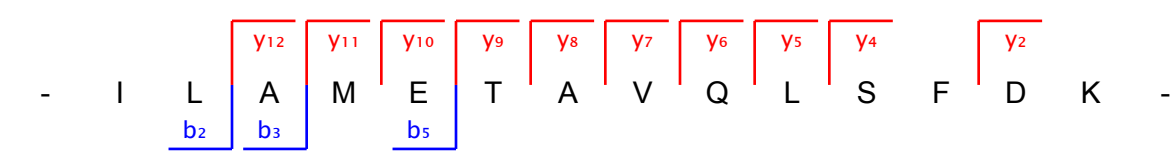

Raw file 20150307\_Hepa2\_Top\_opt\_D2\_01\_1673 Scan 61370 Method TOF; CID Score 82.26 m/z 567.33 Gene names Rp2

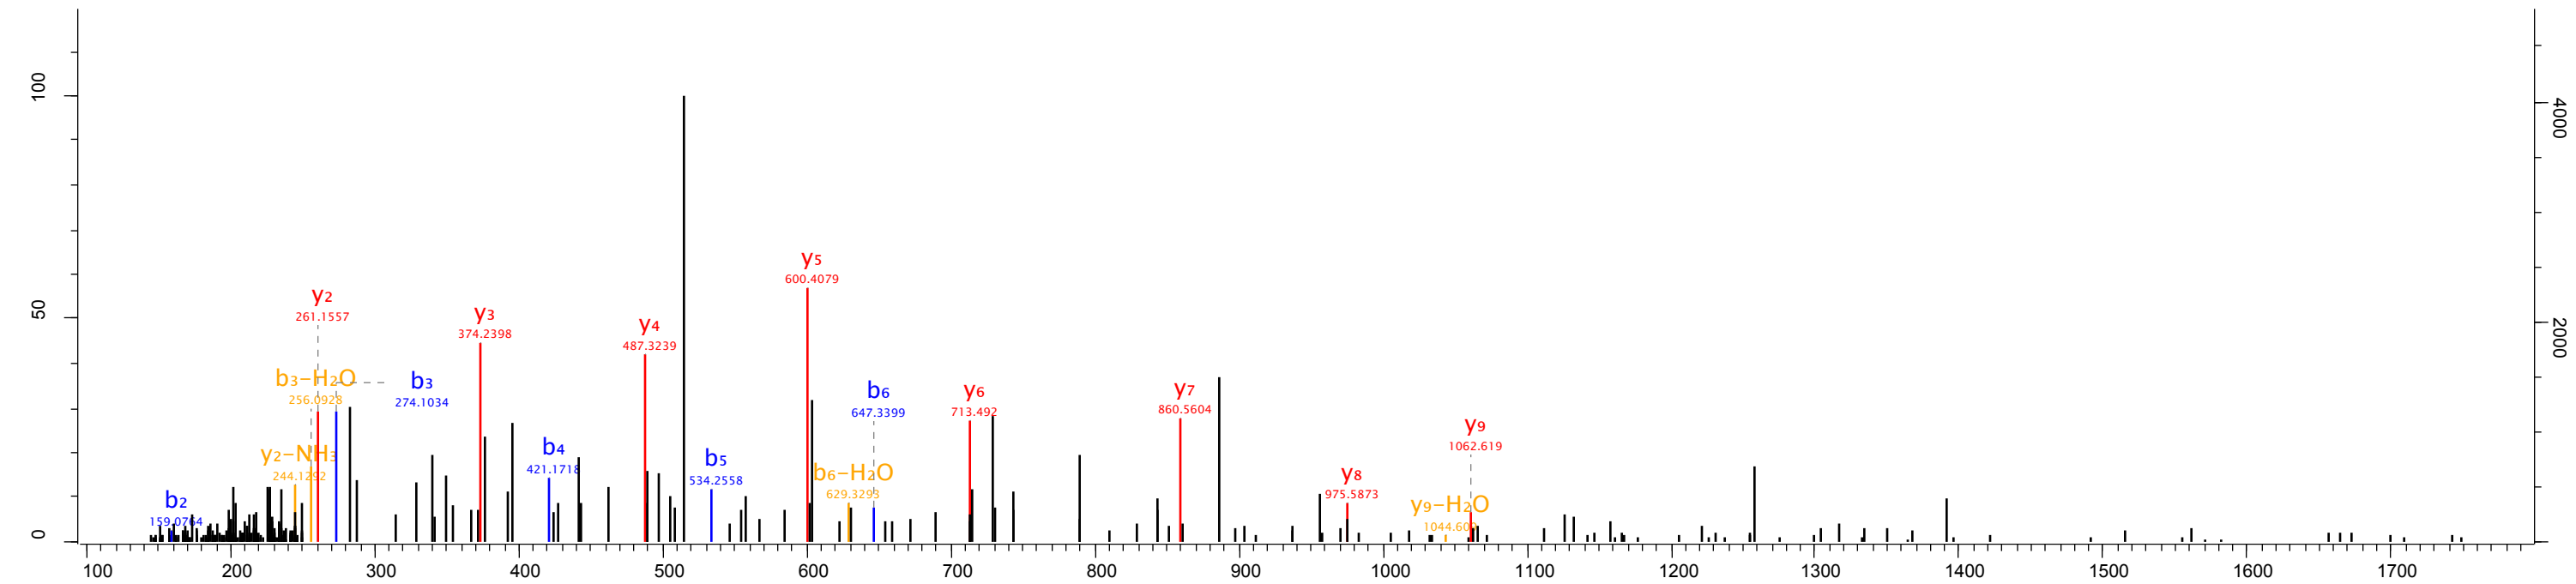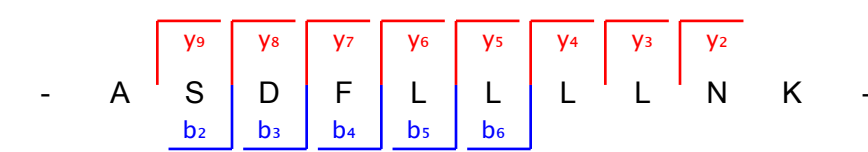

Raw file 20150307\_Hepa2\_Top\_opt\_D2\_01\_1673 Scan 63388 Method TOF; CID Score 33.49 m/z 858.43 Gene names Rnpc3

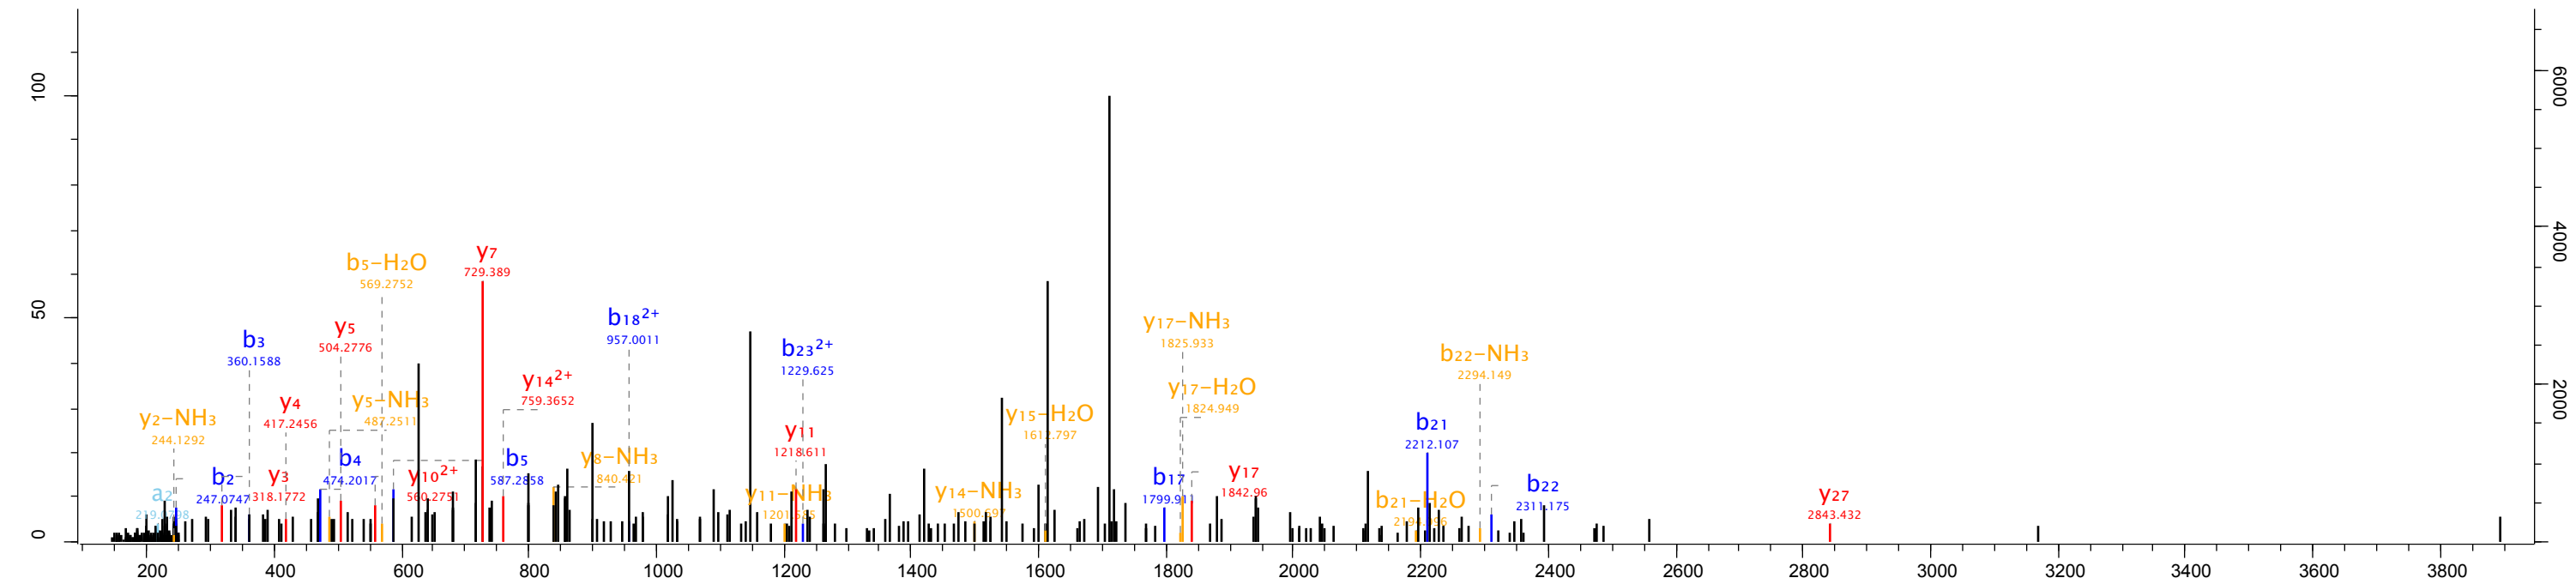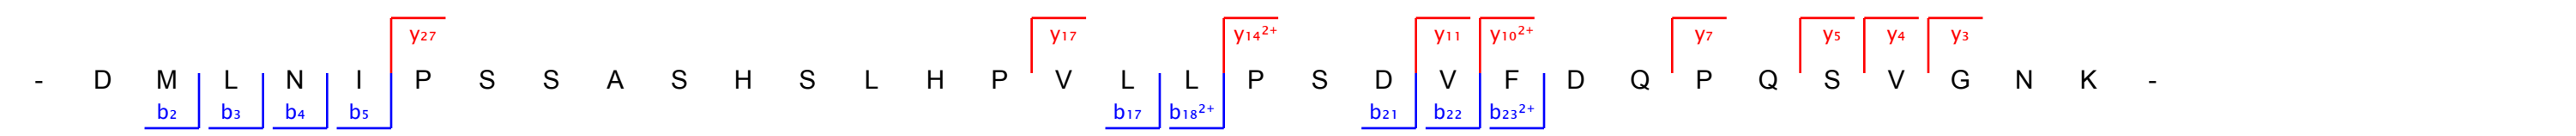

Raw file 20150307\_Hepa2\_Top\_opt\_D2\_01\_1673 Scan 63495 Method TOF; CID Score 76.15 m/z 967.49 Gene names Cox11

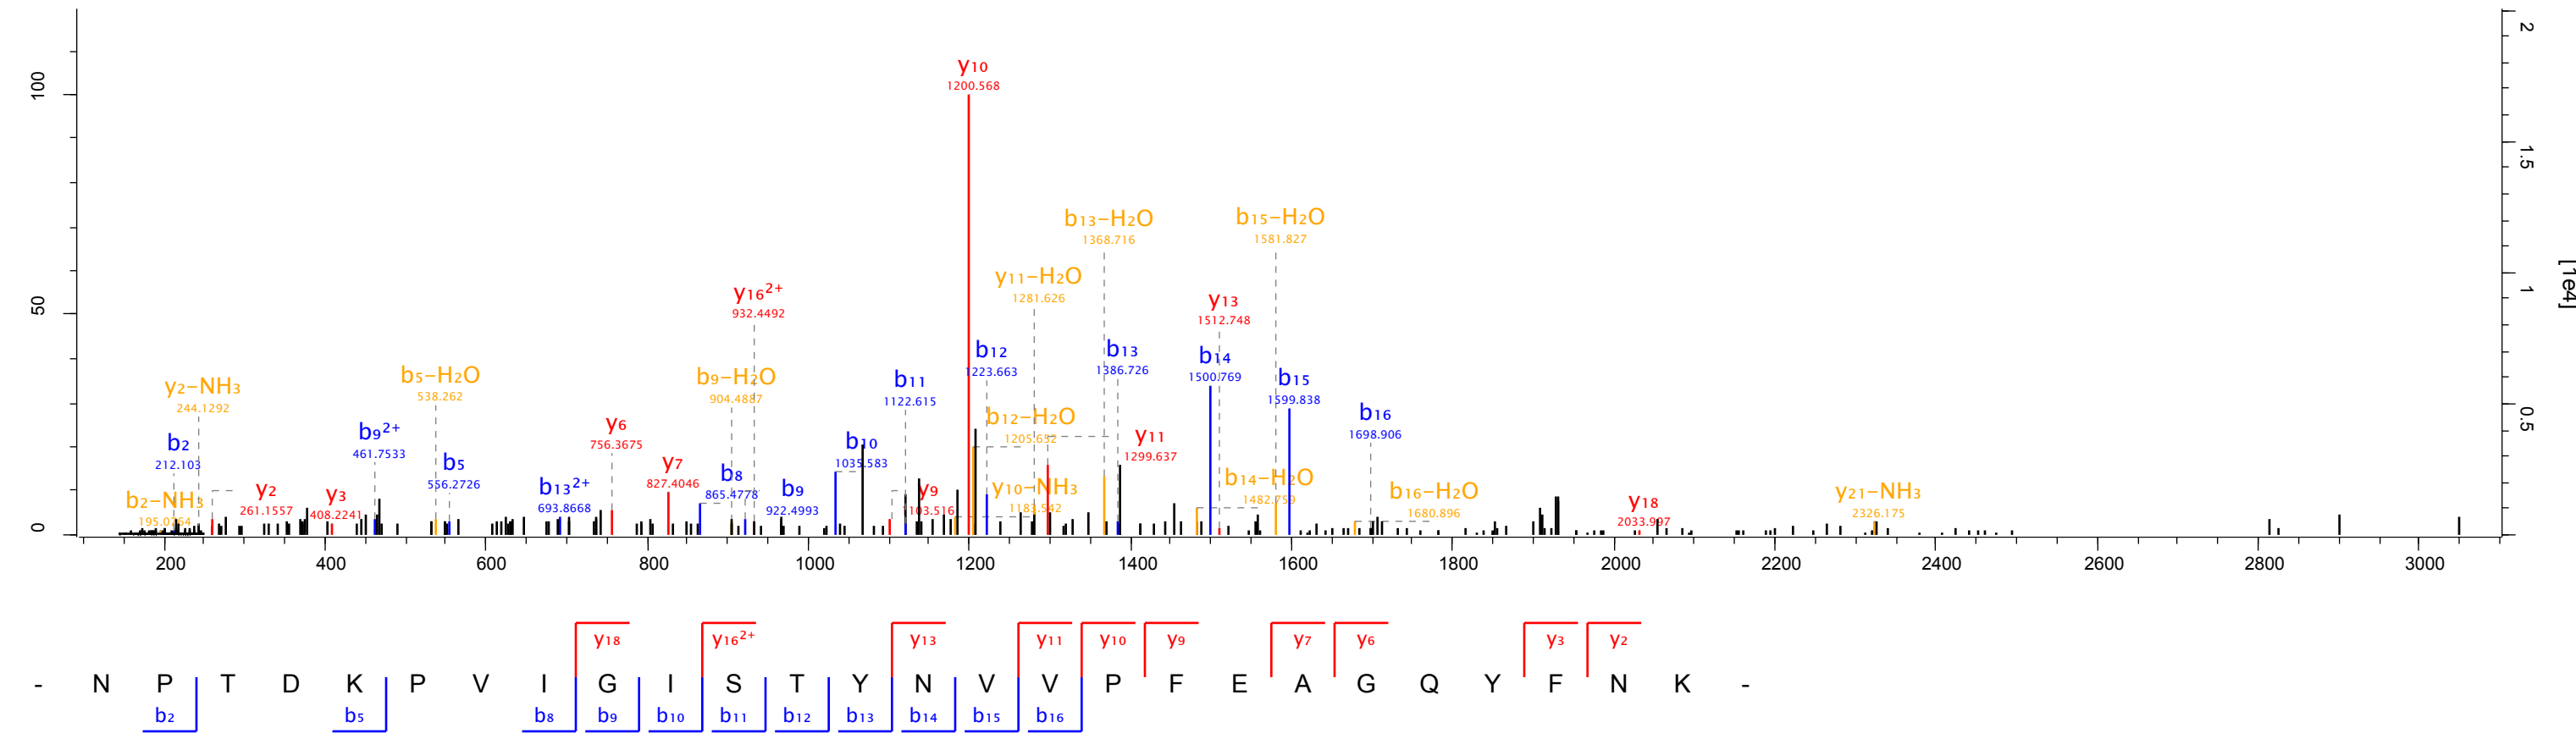

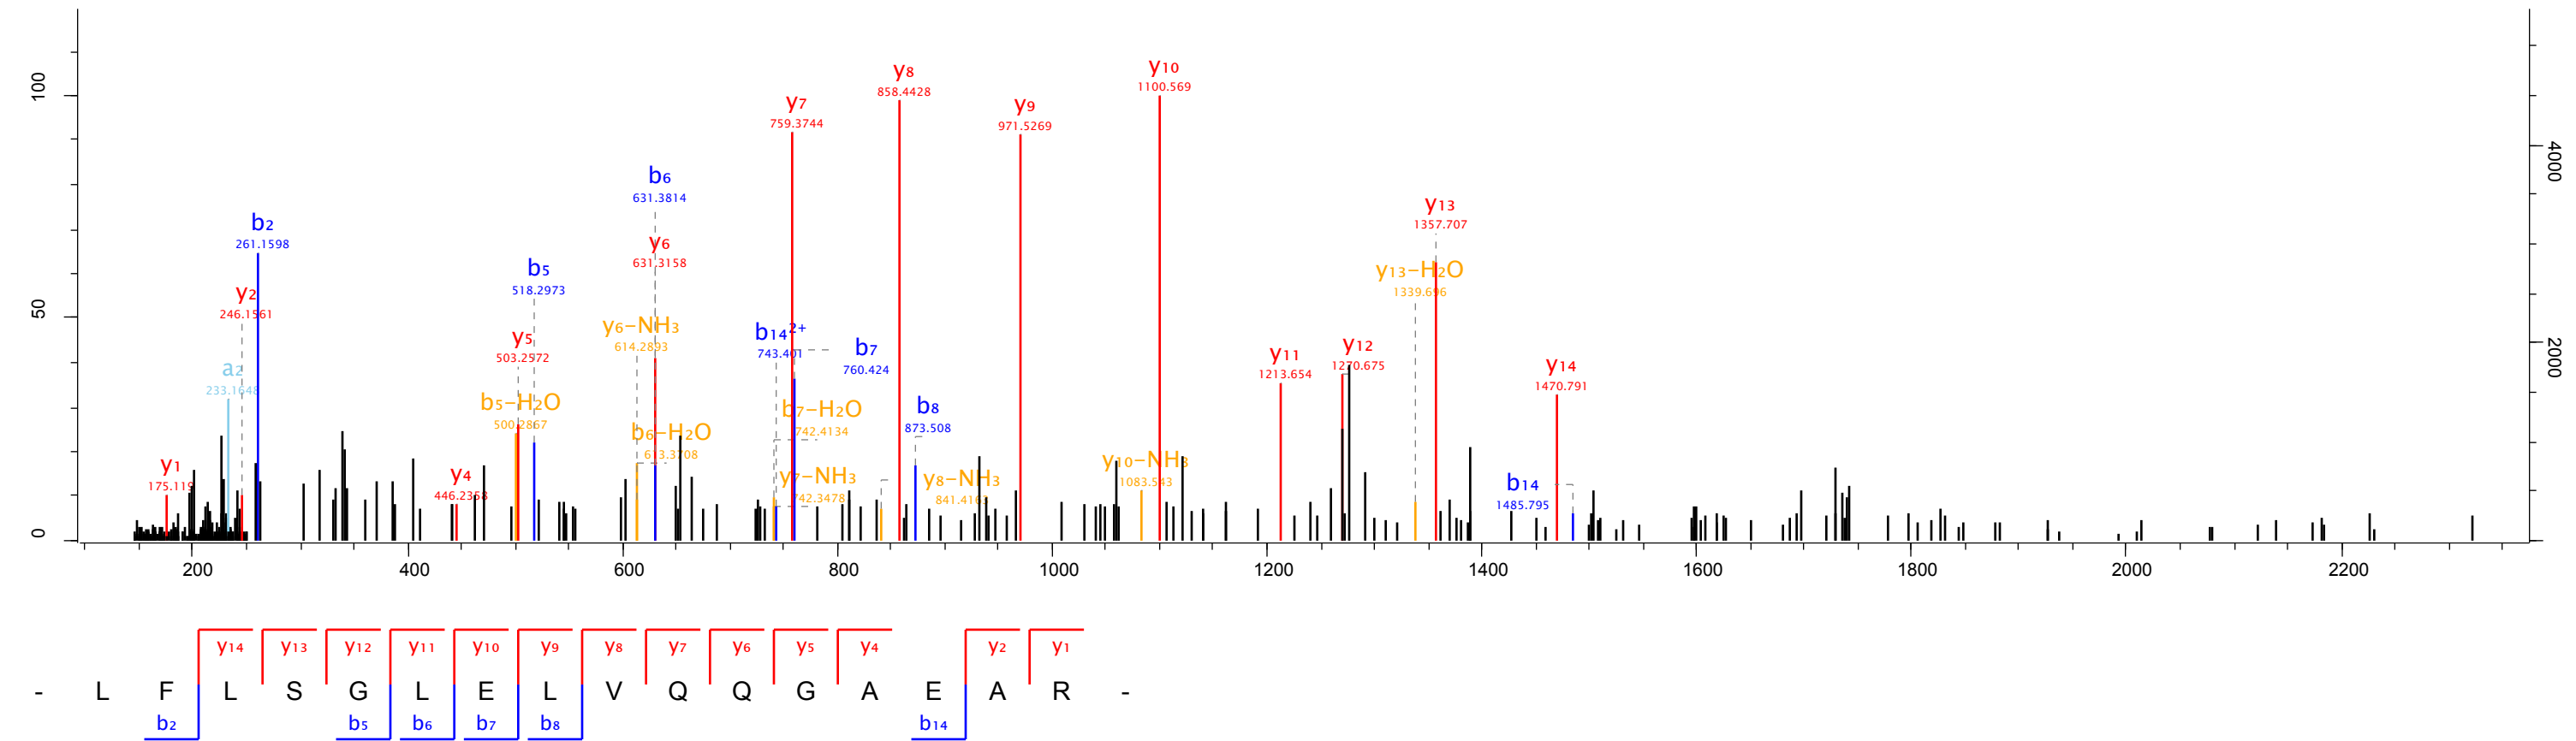

Raw file 20150307\_Hepa2\_Top\_opt\_D2\_01\_1673 Scan 64371 Method TOF; CID Score 70.84 m/z 695.36 Gene names Mcee

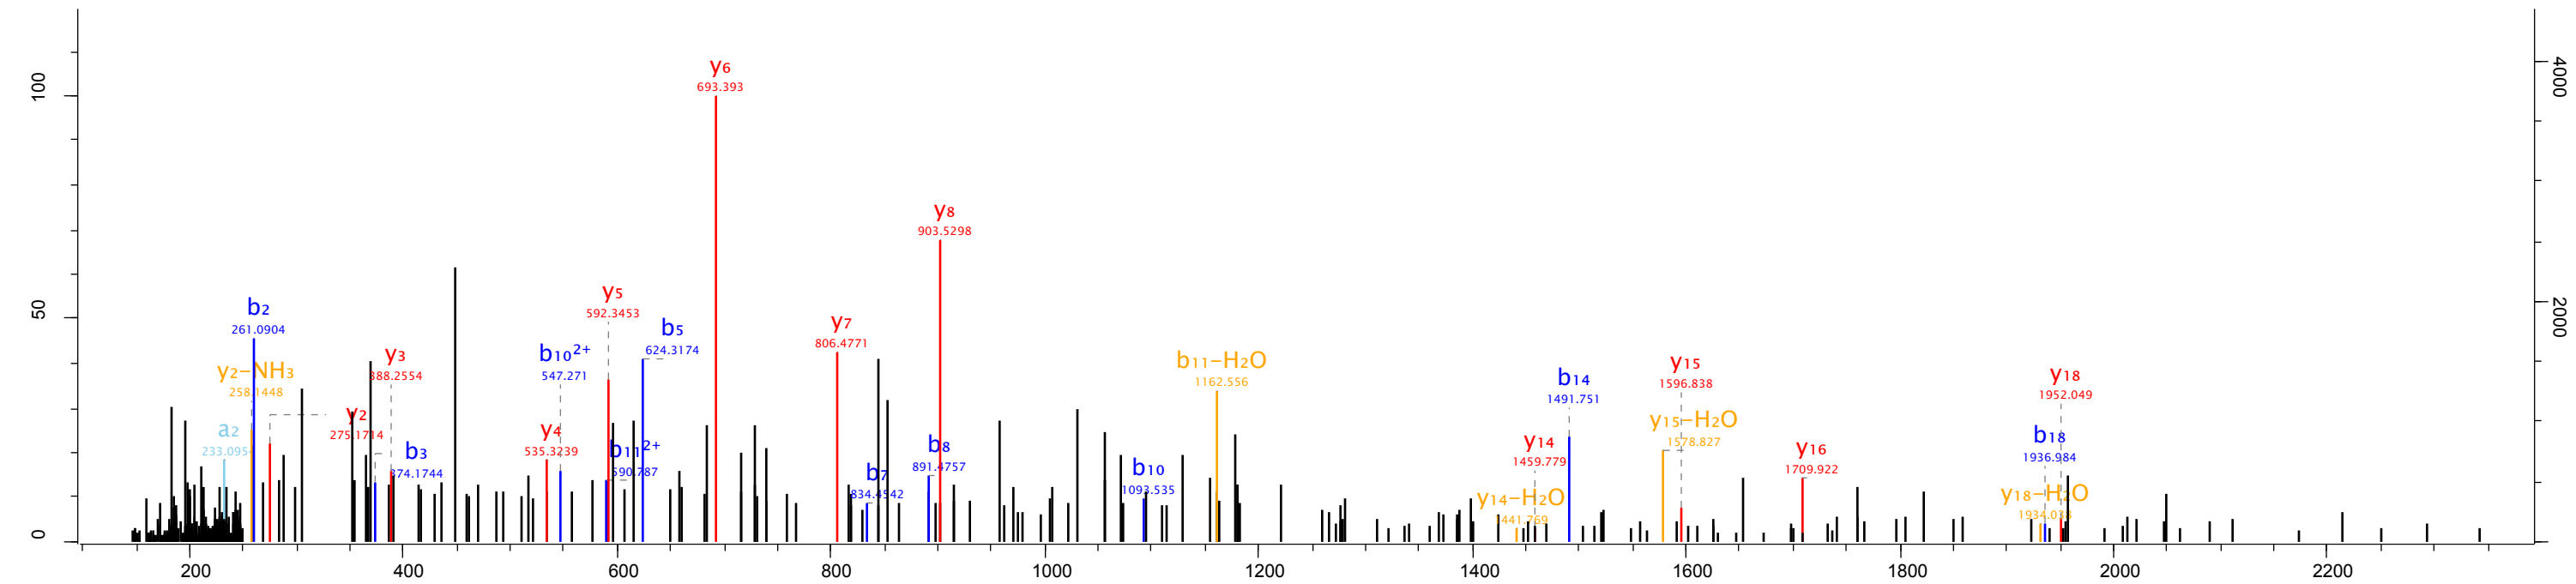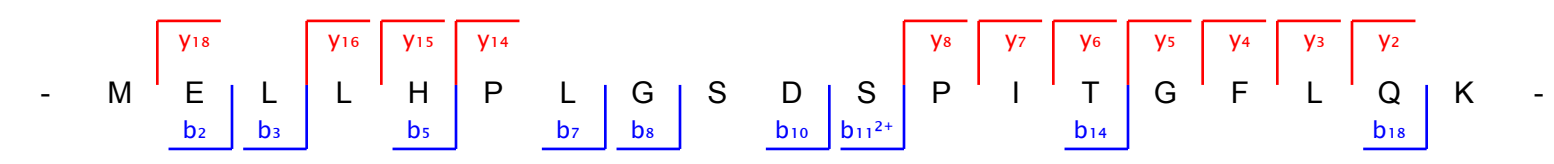

Raw file 20150307\_Hepa2\_Top\_opt\_D2\_01\_1673 Scan 65602 Method TOF; CID Score 57.15 m/z 884.45 Gene names Adat3

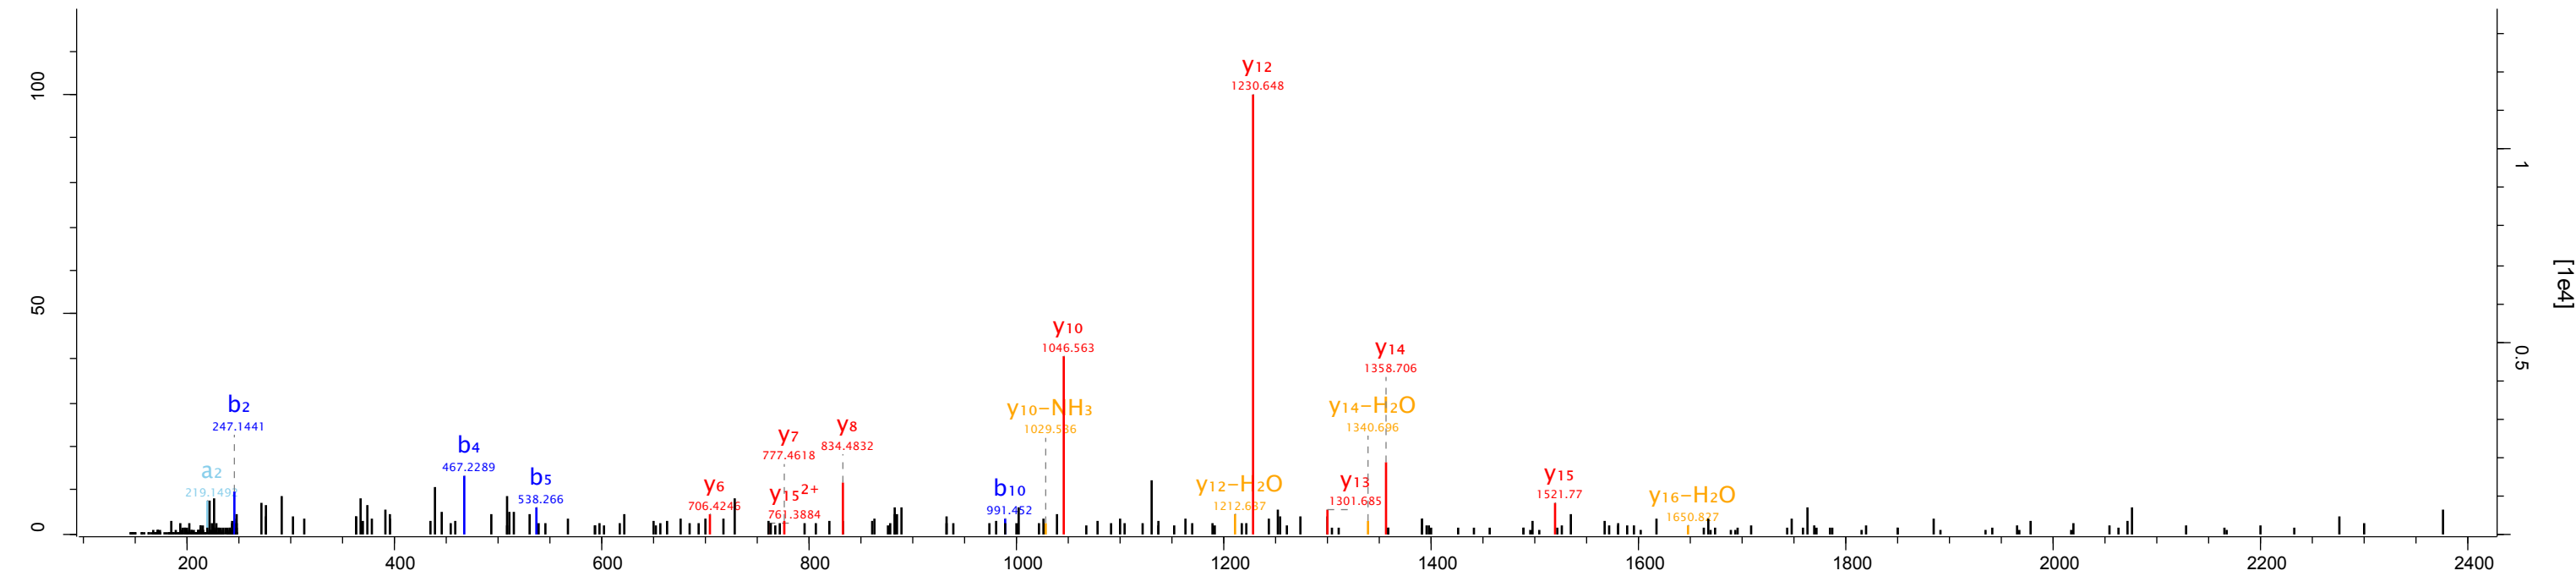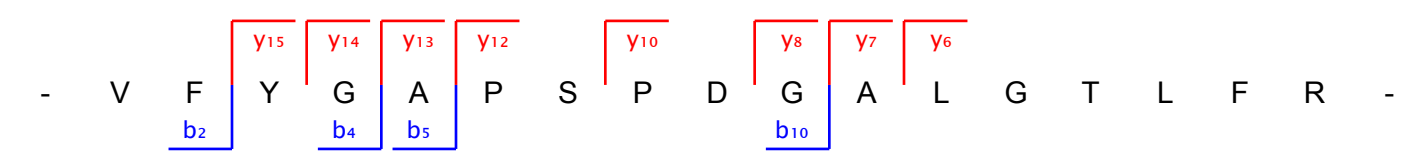



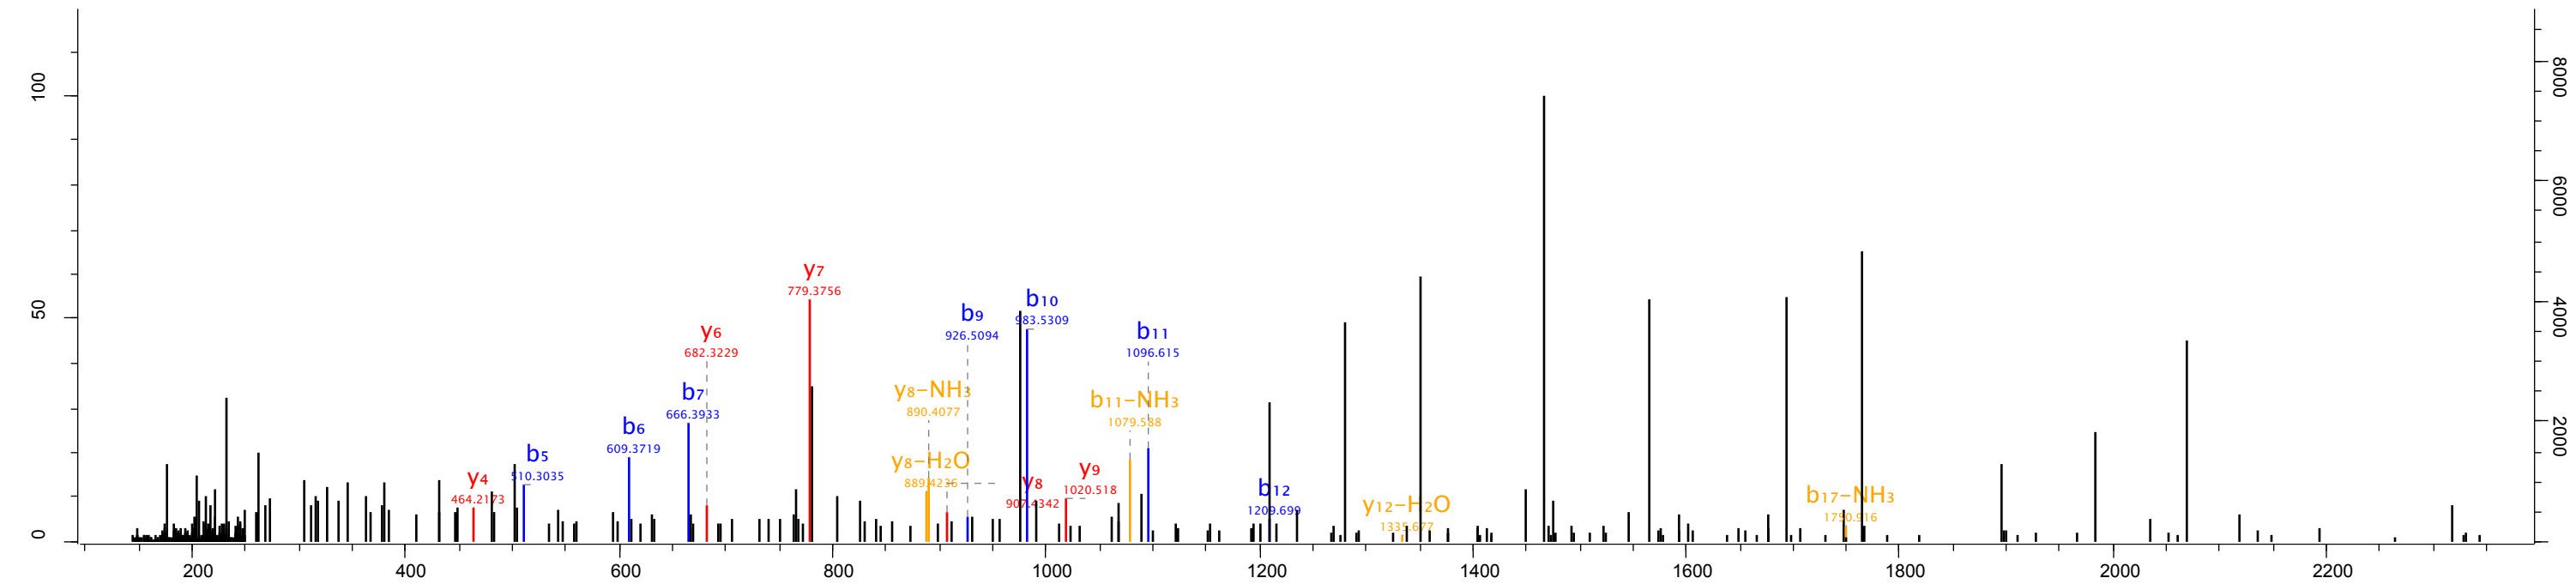

- K G P N I V G P Y G I L Q P F A D A M K -

Fragmentation sites are indicated by brackets below the sequence:

- Blue brackets (b-series): I-V, V-G, G-P, Y-G, G-I, I-L, L-Q, Q-P, P-F, F-A, A-D, D-A, A-M, M-K.
- Red brackets (y-series): I-L, L-Q, Q-P, P-F, F-A, A-D.

Raw file 20150307\_Hepa2\_Top\_opt\_D2\_01\_1673 Scan 67886 Method TOF; CID Score 37.53 m/z 865.45 Gene names Med28

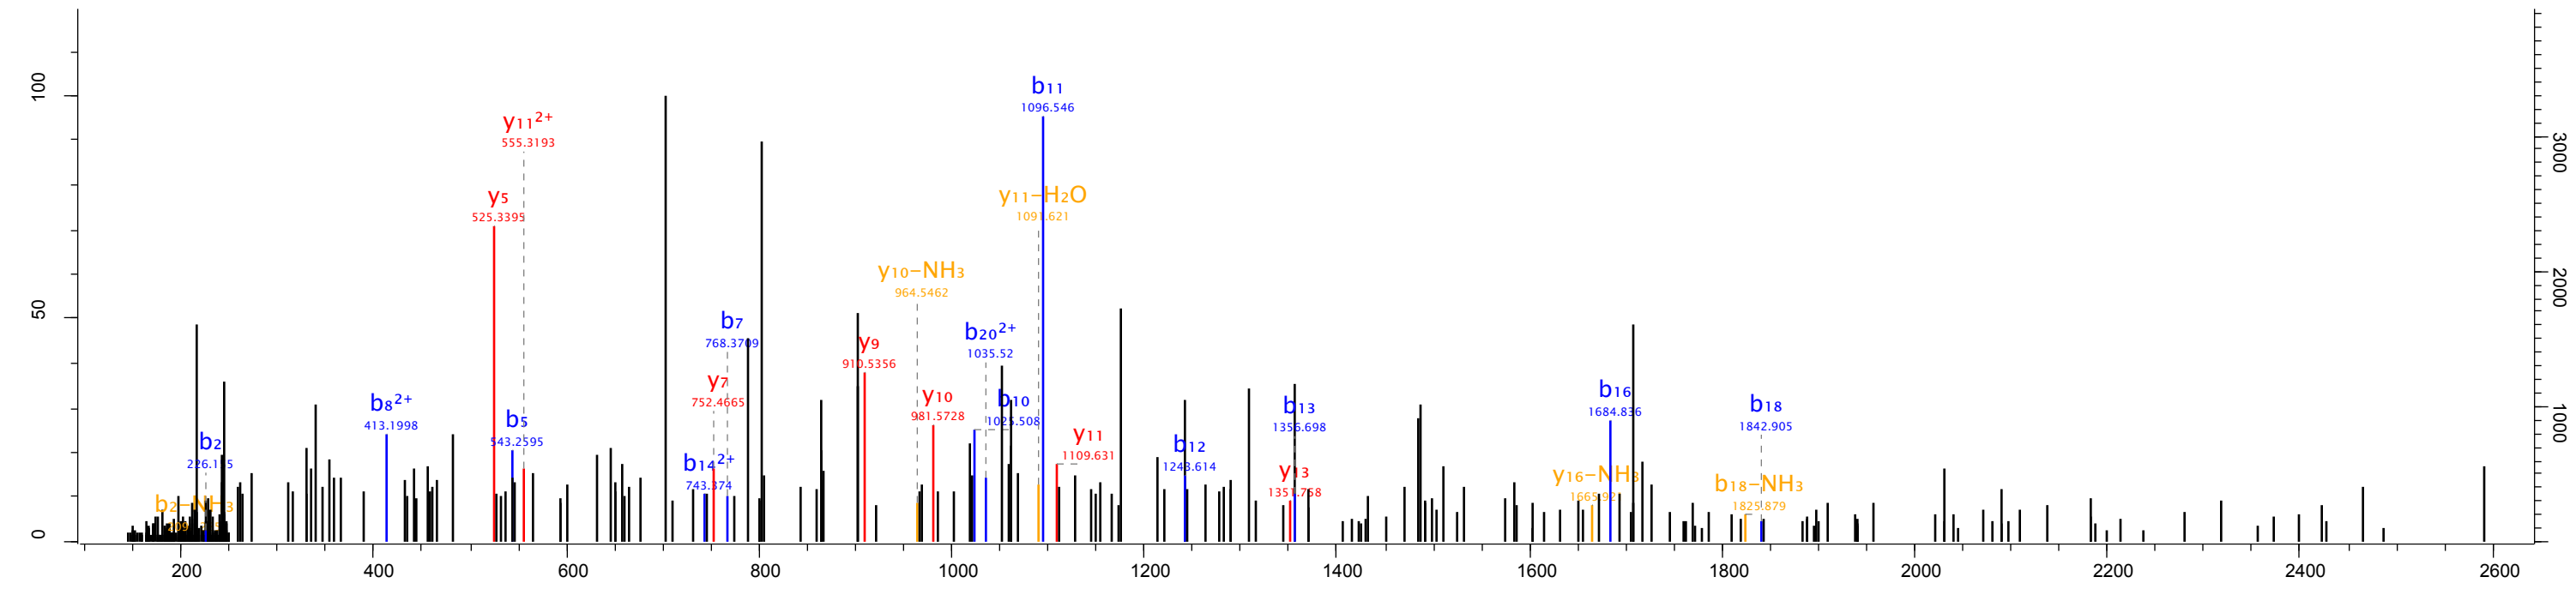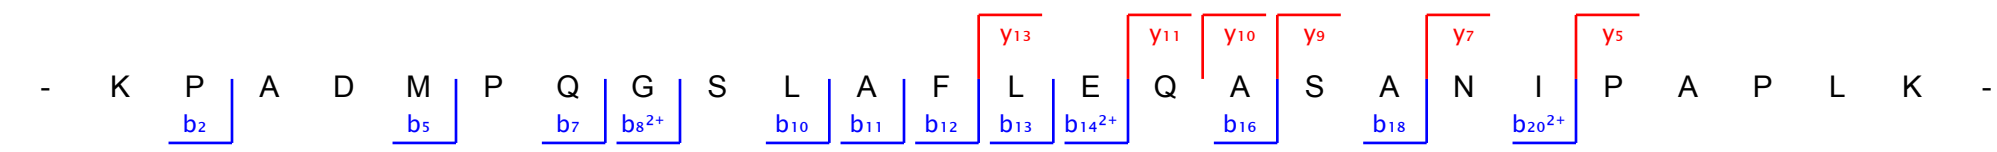

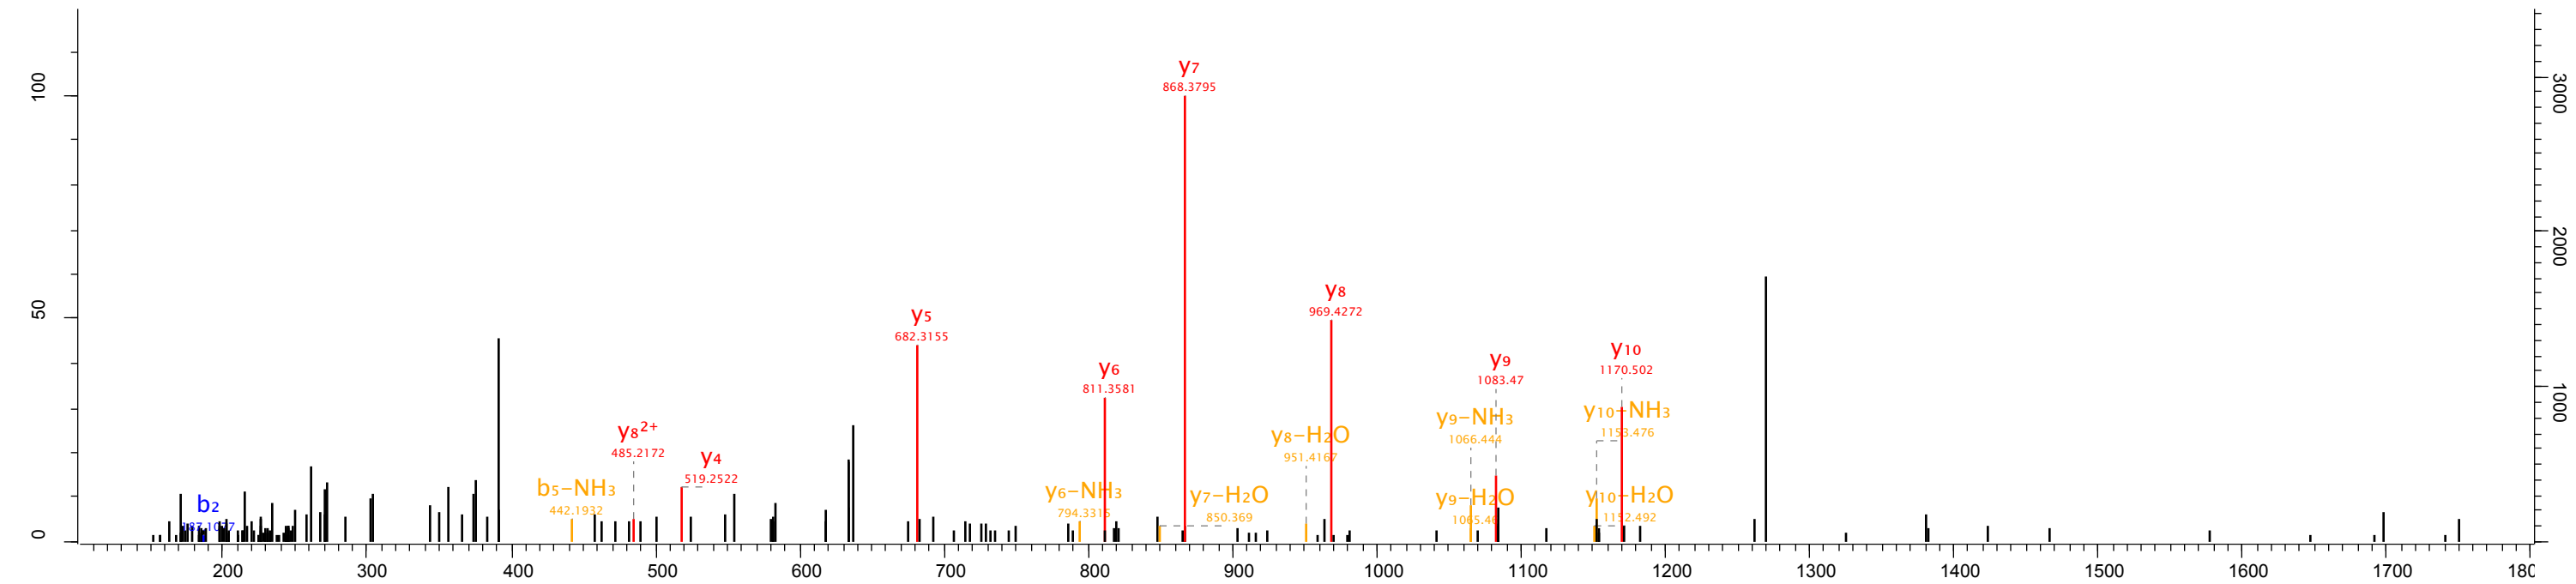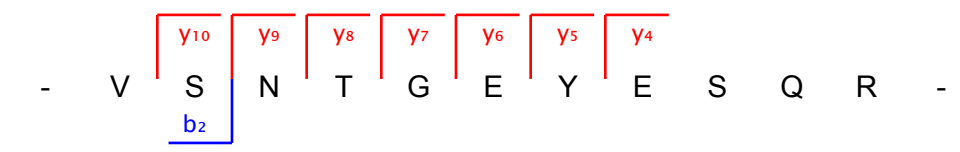

Raw file 20150307\_Hepa2\_Top\_opt\_D2\_01\_1686 Scan 10335 Method TOF; CID Score 86.9 m/z 538.76 Gene names Med22

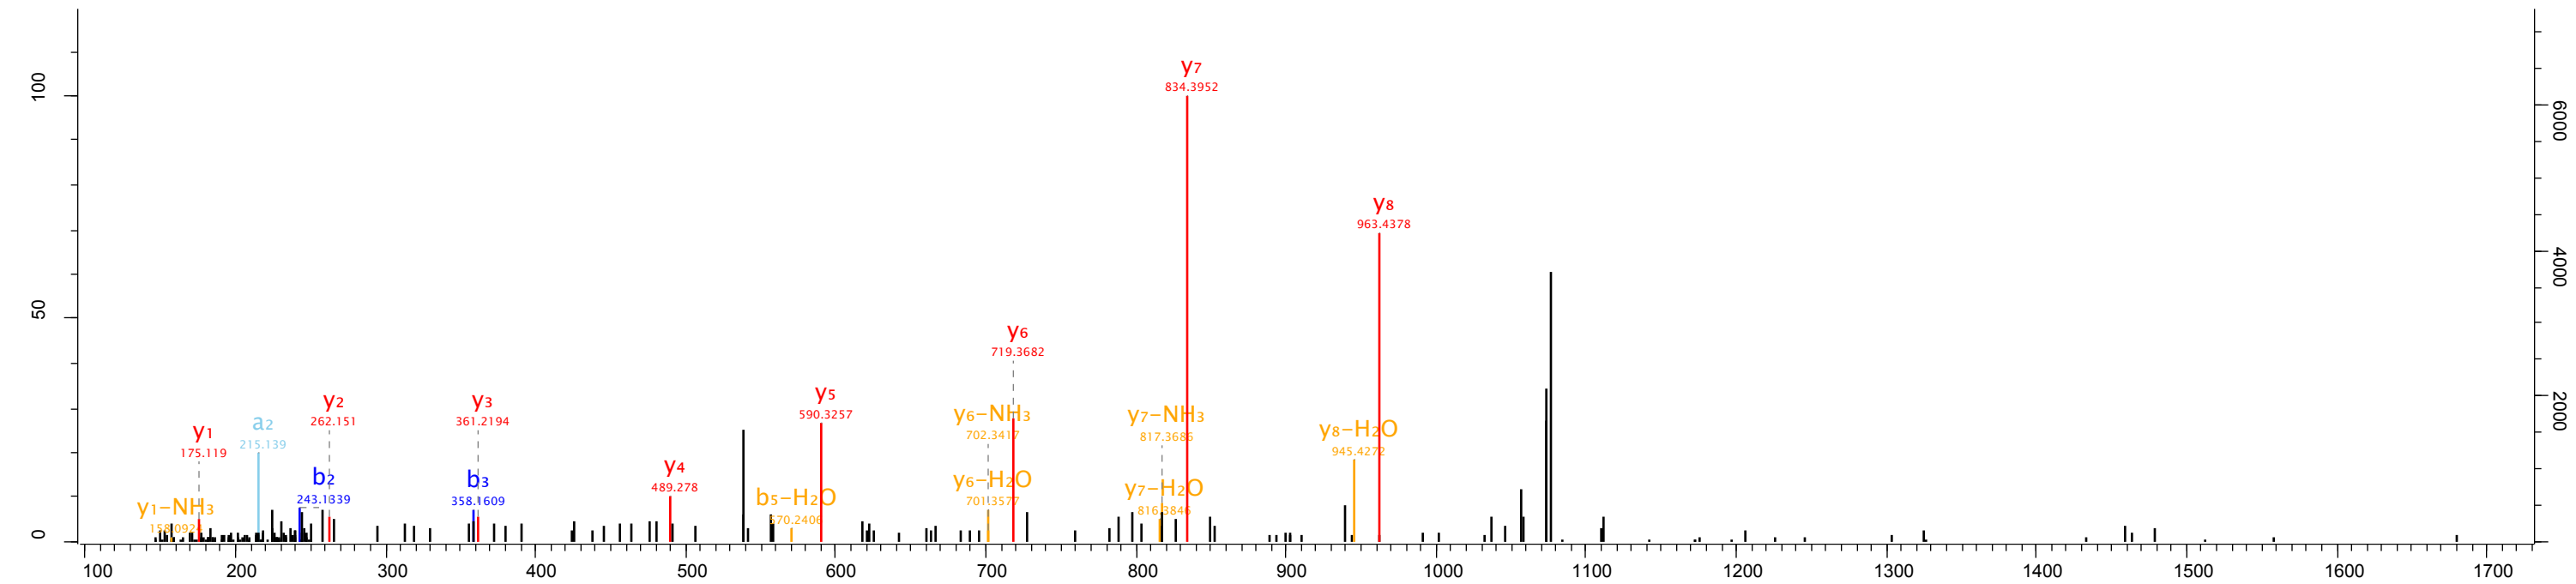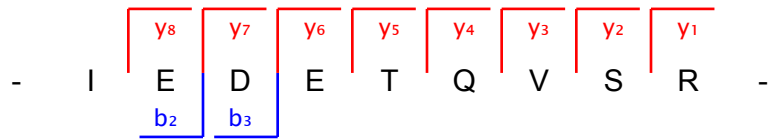

Raw file  
20150307\_Hepa2\_Top\_opt\_D2\_01\_1686

Scan 13137 Method TOF; CID Score 76.34 m/z 860.41 Gene names Sgol2

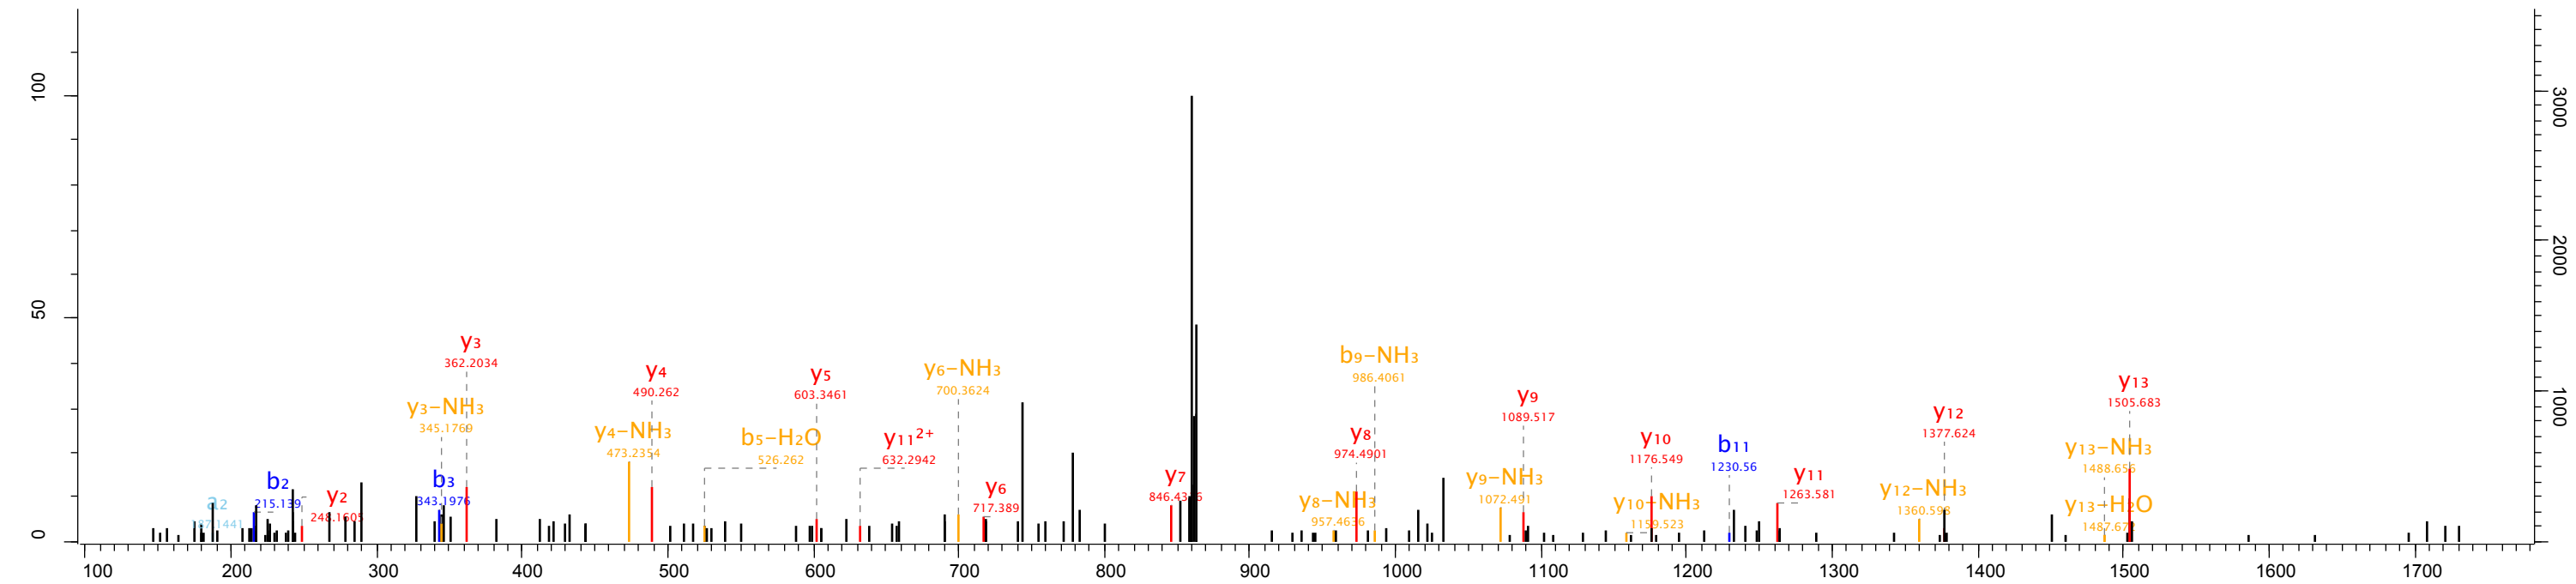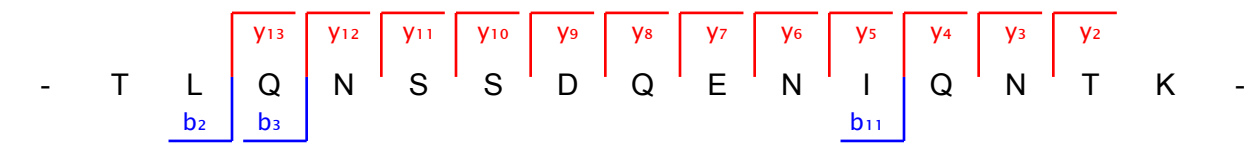

Raw file 20150307\_Hepa2\_Top\_opt\_D2\_01\_1686 Scan 15685 Method TOF; CID Score 78.14 m/z 510.27

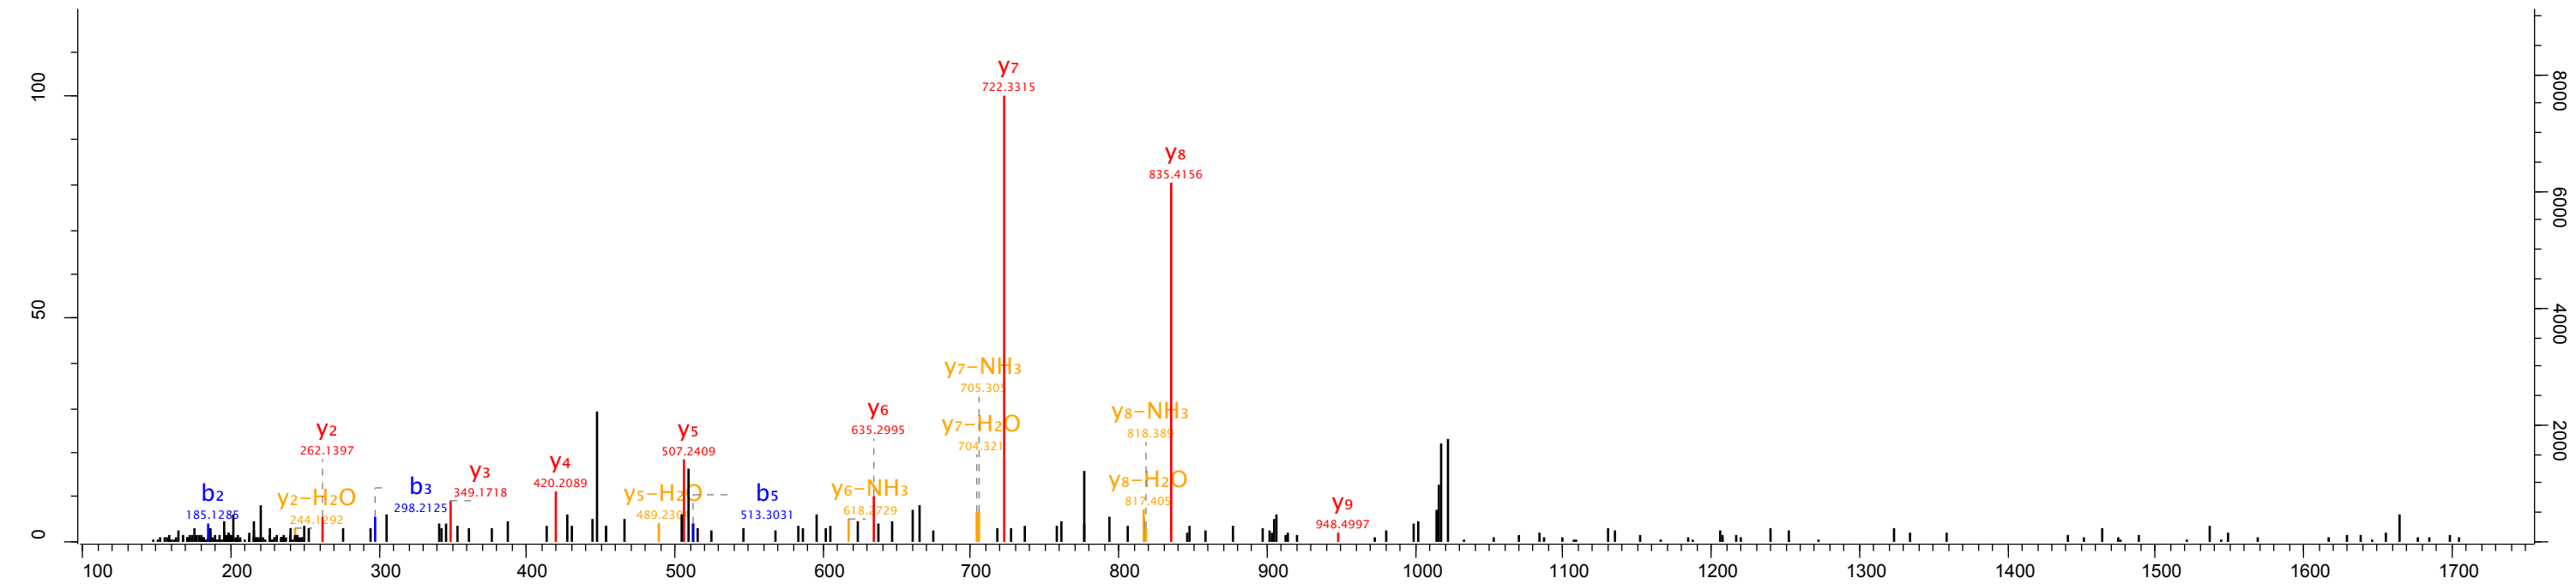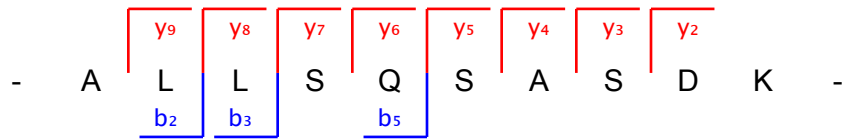

Raw file 20150307\_Hepa2\_Top\_opt\_D2\_01\_1686 Scan 17330 Method TOF; CID Score 68.48 m/z 548.27 Gene names Tdp2

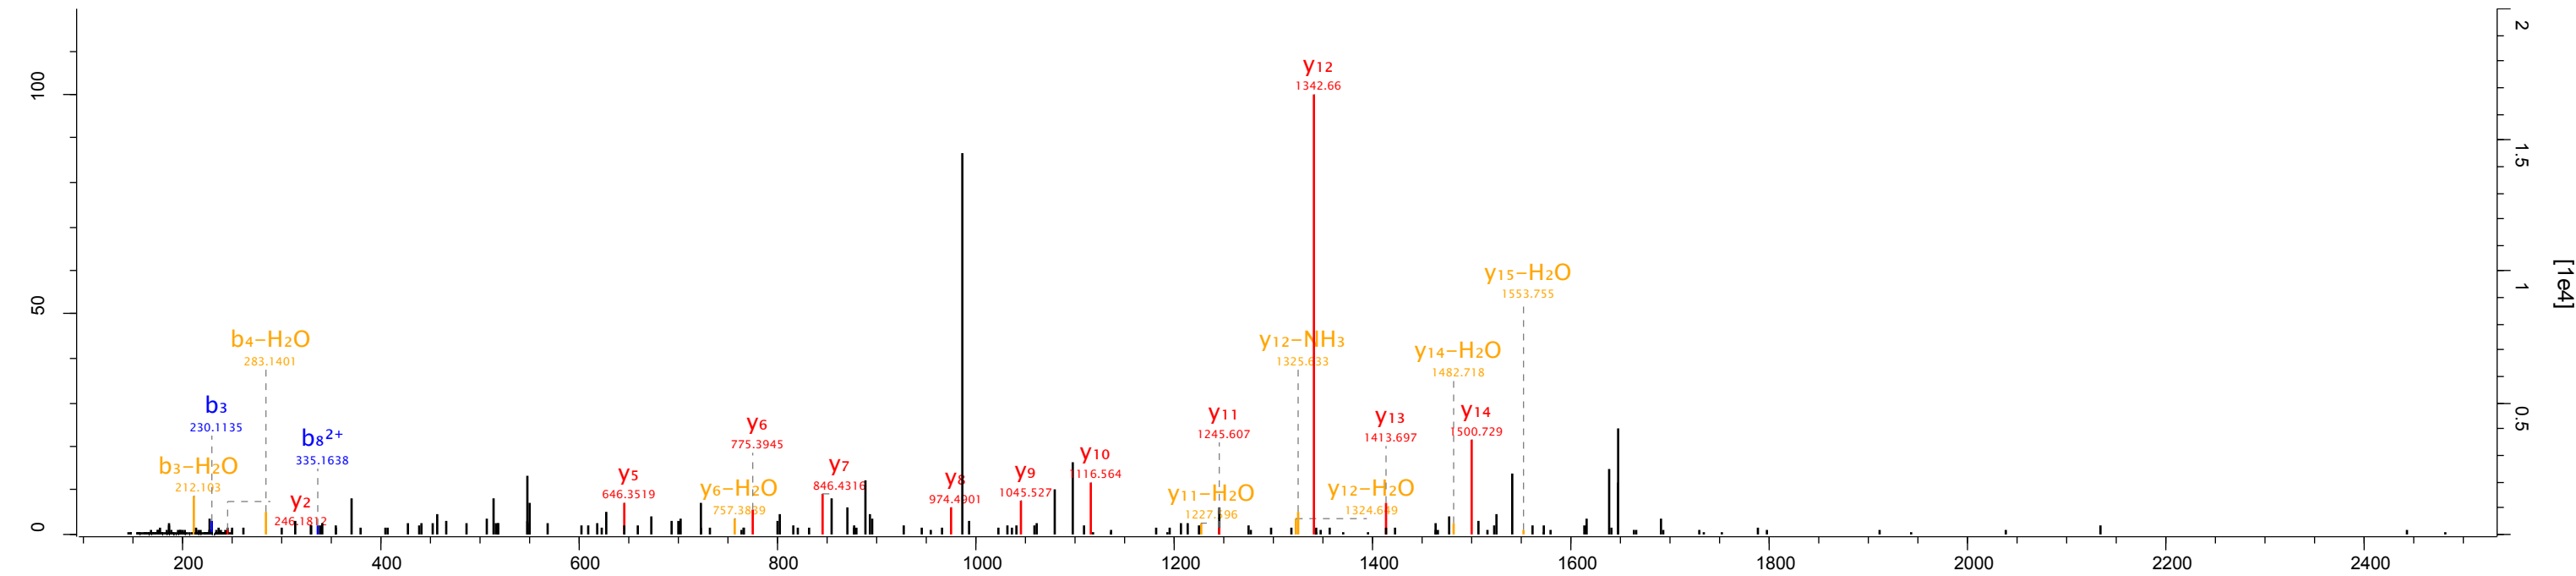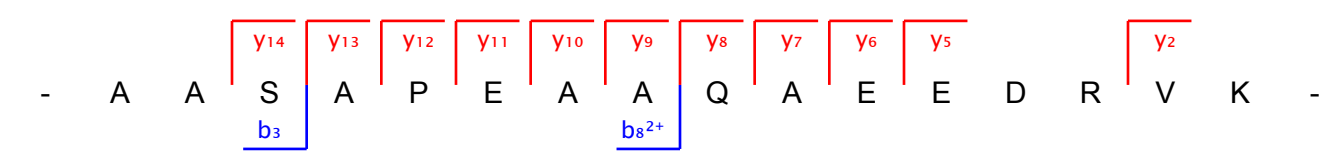

Raw file 20150307\_Hepa2\_Top\_opt\_D2\_01\_1686 Scan 18805 Method TOF; CID Score 104.2 m/z 810.9 Gene names 2310022A10Rik

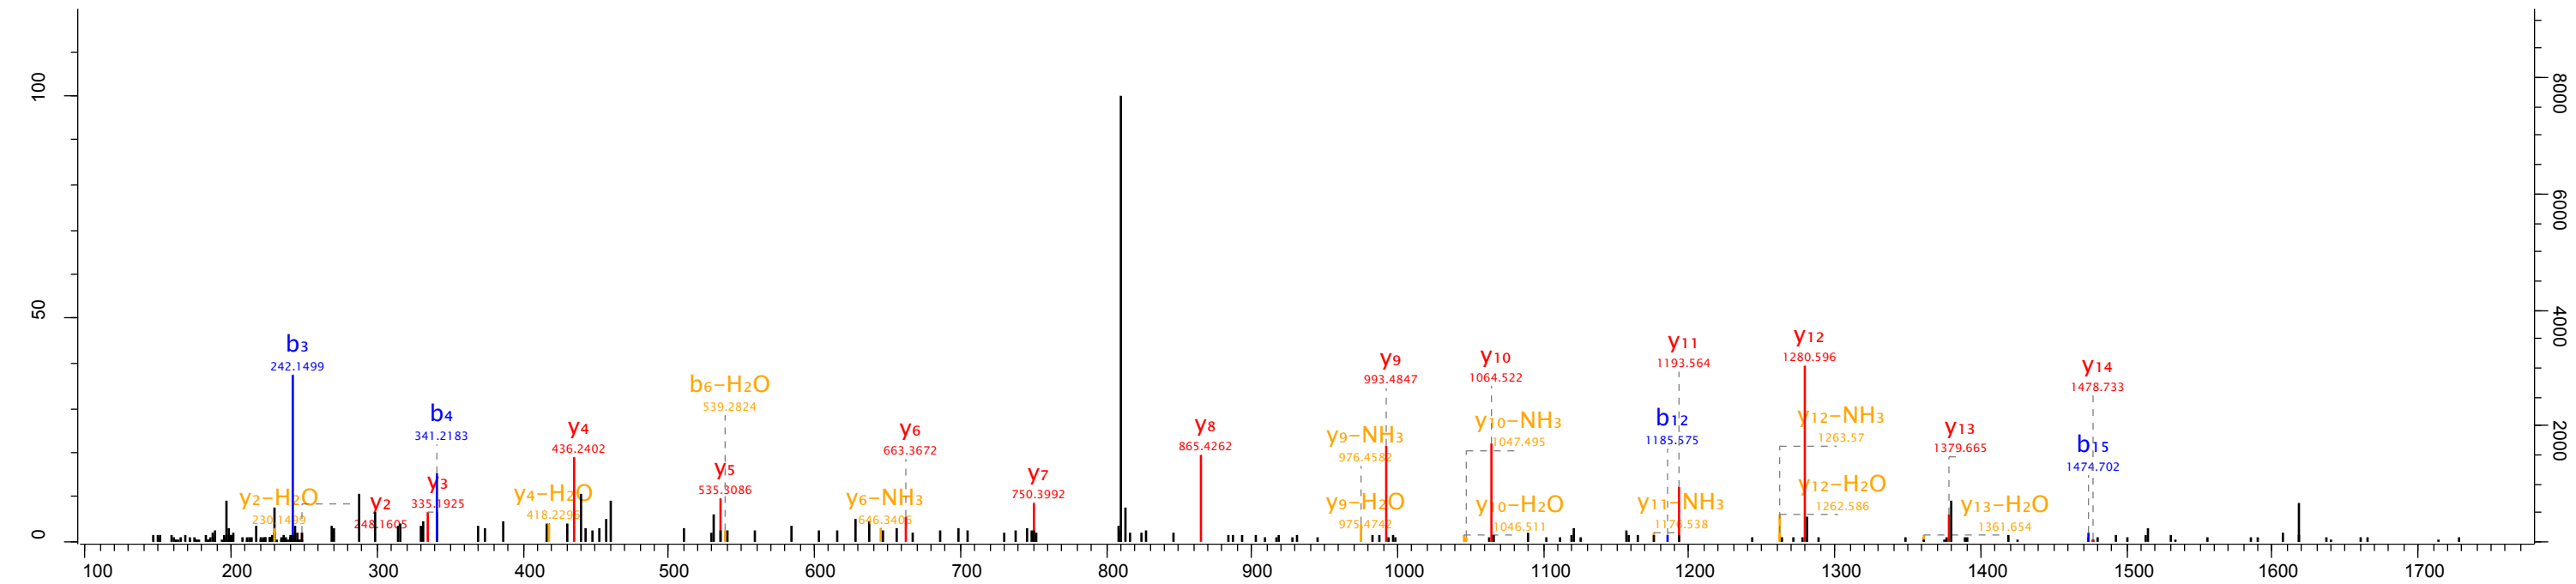

- A A V V S E A Q D S Q V T S T K -

b<sub>3</sub> b<sub>4</sub> b<sub>12</sub> b<sub>15</sub>

y<sub>14</sub> y<sub>13</sub> y<sub>12</sub> y<sub>11</sub> y<sub>10</sub> y<sub>9</sub> y<sub>8</sub> y<sub>7</sub> y<sub>6</sub> y<sub>5</sub> y<sub>4</sub> y<sub>3</sub> y<sub>2</sub>



Raw file 20150307\_Hepa2\_Top\_opt\_D2\_01\_1686 Scan 21715 Method TOF; CID Score 79.66 m/z 599.82 Gene names Psmb10

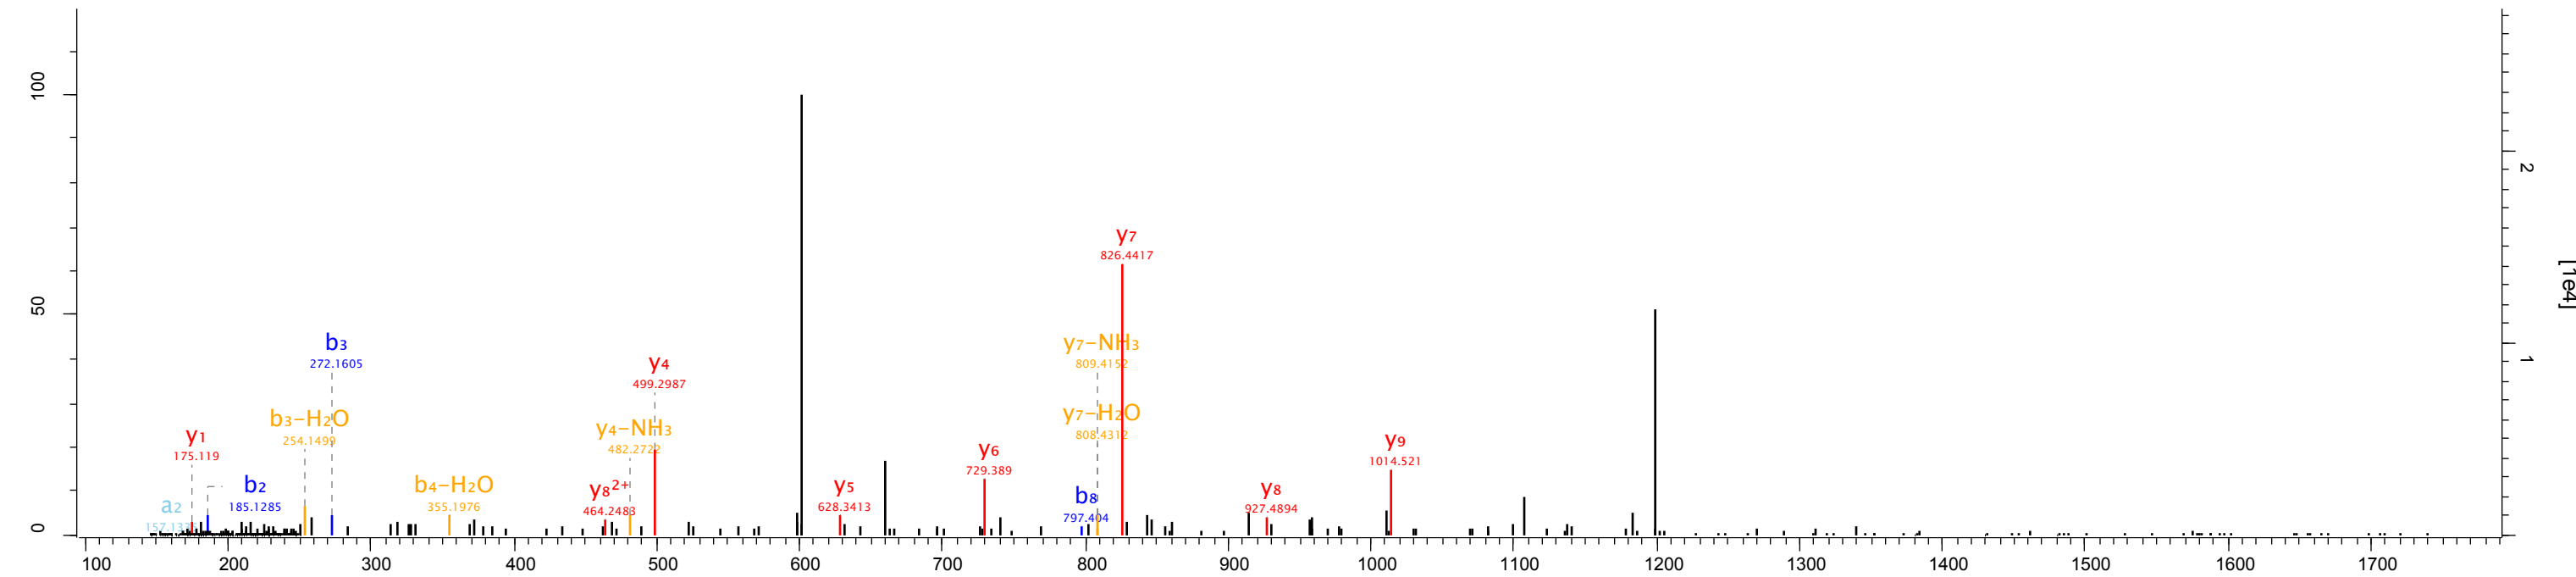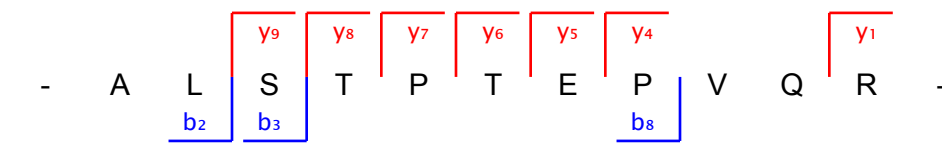

Raw file 20150307\_Hepa2\_Top\_opt\_D2\_01\_1686 Scan 26563 Method TOF; CID Score 60.26 m/z 453.24 Gene names Nsun4

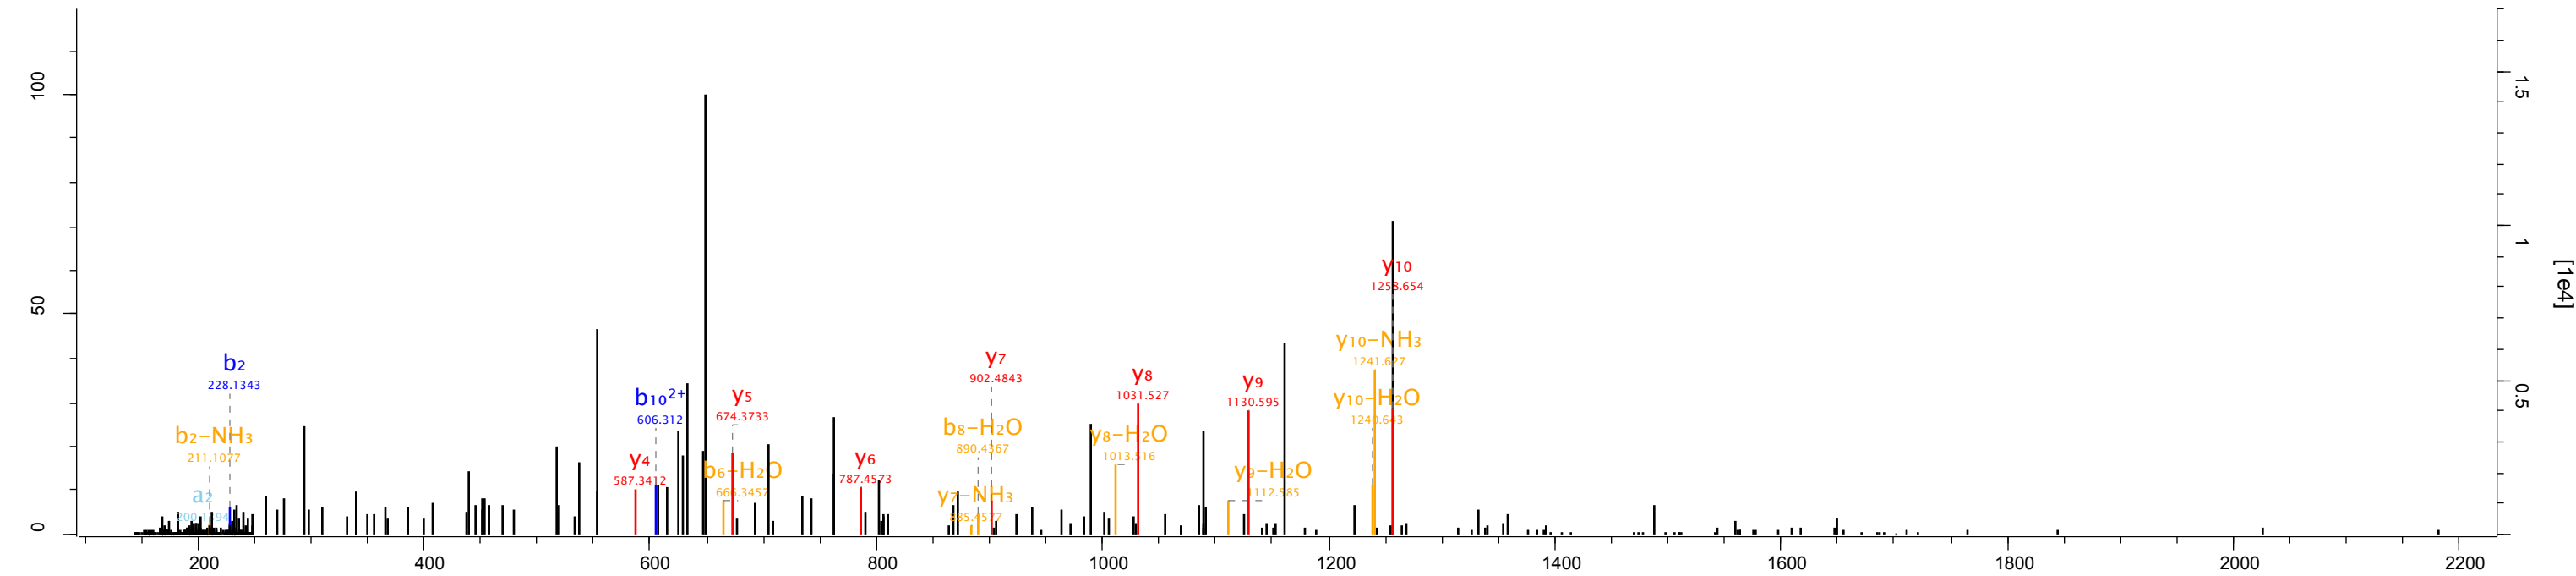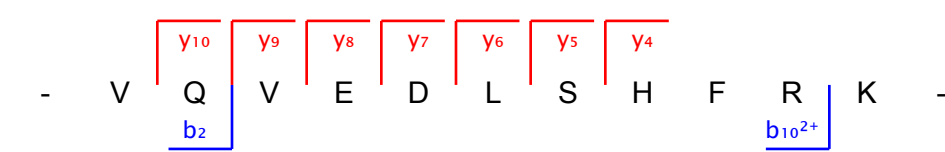

Raw file  
20150307\_Hepa2\_Top\_opt\_D2\_01\_1686

Scan Method Score m/z Gene names  
30992 TOF; CID 76.82 569.64 KIH142

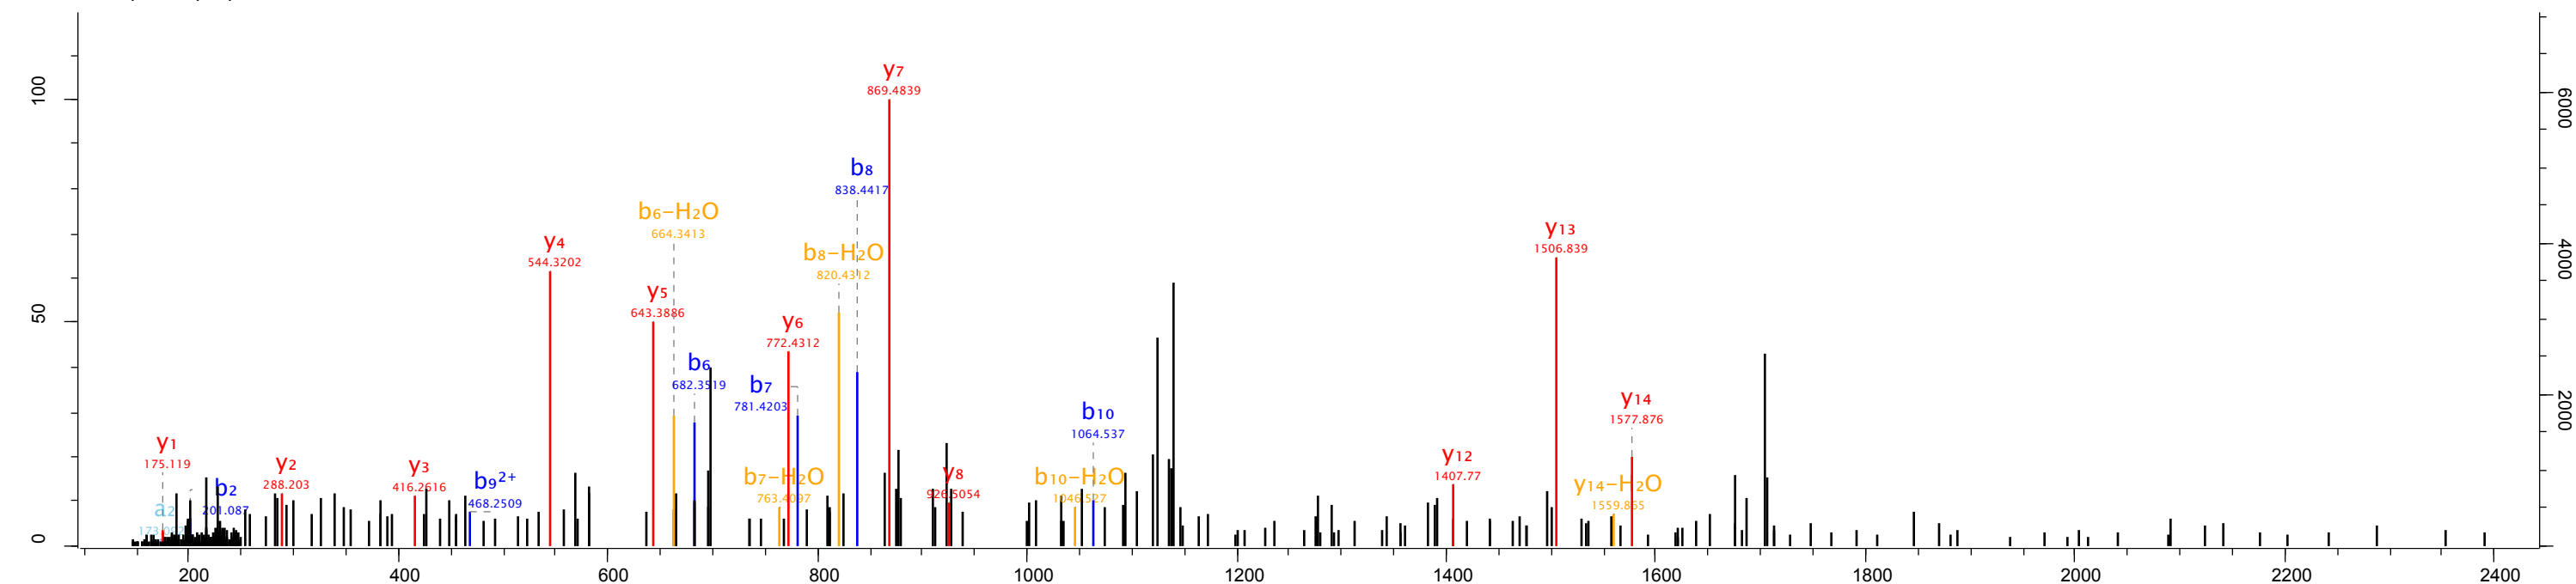

- E A V R P E V G P E V Q Q L R -

Fragmentation mapping (b and y ions):

- Red boxes (y ions): y14 (A-V), y13 (V-R), y12 (R), y8 (G-P), y7 (P-E), y6 (E-V), y5 (V-Q), y4 (Q-Q), y3 (Q-L), y2 (L-R), y1 (R)
- Blue boxes (b ions): b2 (A), b6 (E-V), b7 (V-G), b8 (G-P), b9<sup>2+</sup> (P-E), b10 (E-V)

Raw file 20150307\_Hepa2\_Top\_opt\_D2\_01\_1686 Scan 39518 Method TOF; CID Score 50.3 m/z 777.39 Gene names Suv39h1

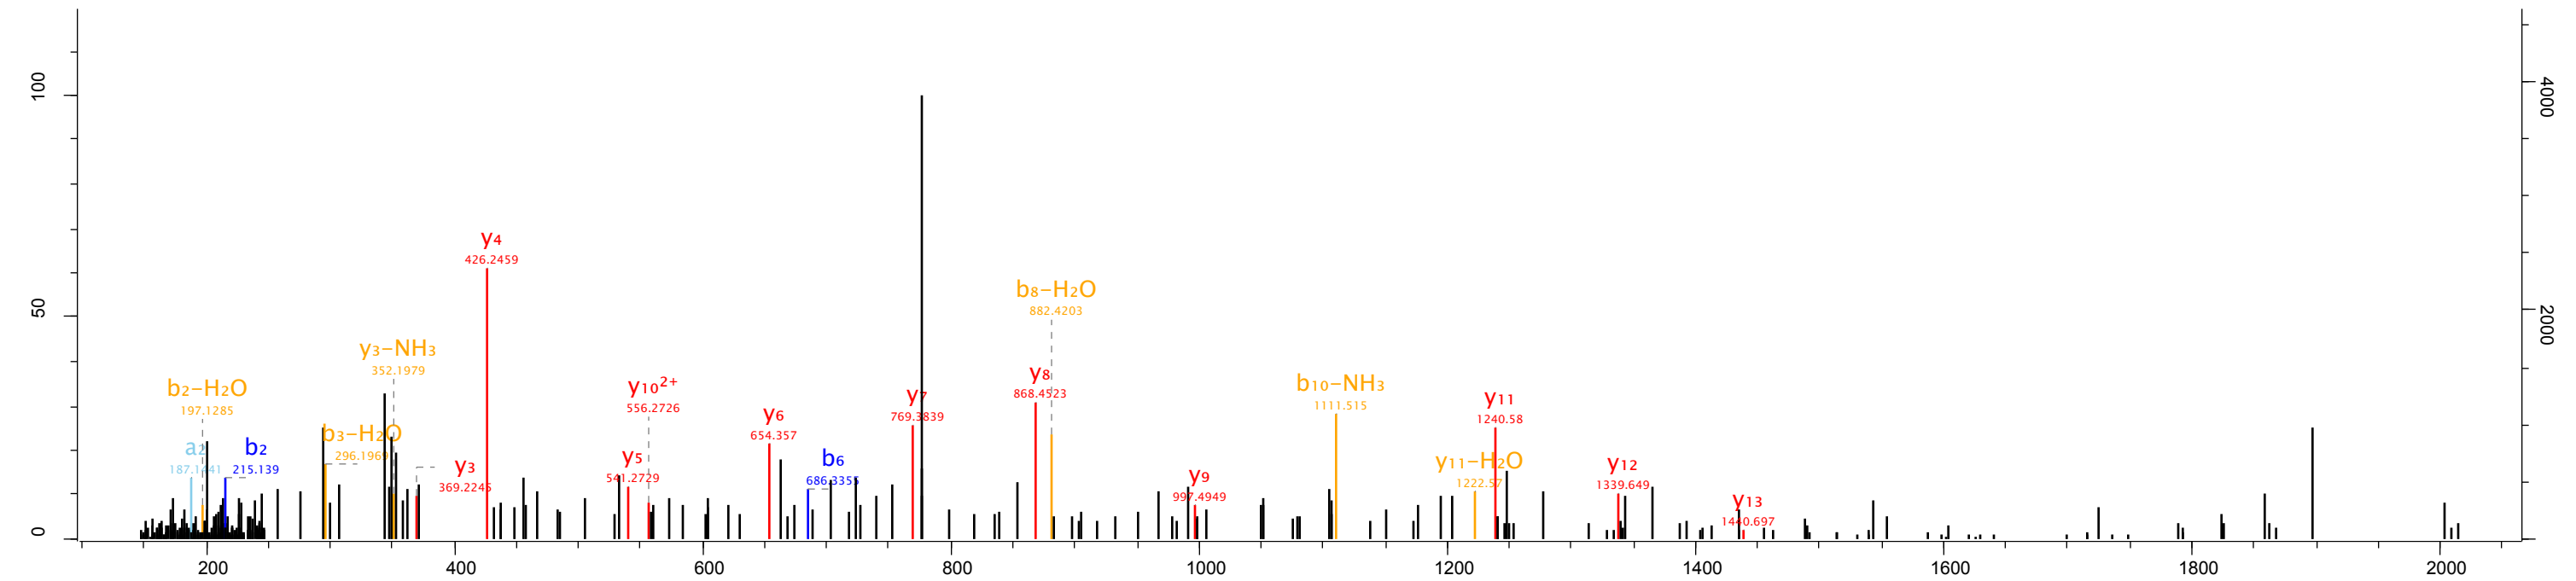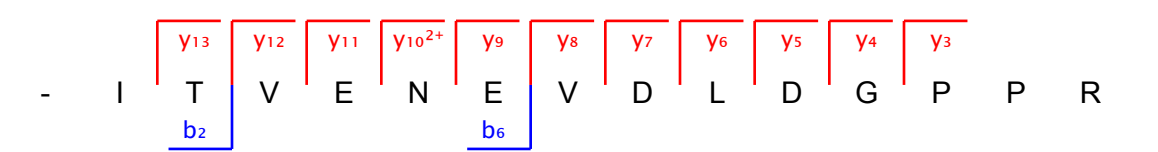

Raw file  
20150307\_Hepa2\_Top\_opt\_D2\_01\_1686

Scan 40103 Method TOF; CID Score 43.03 m/z 438.74 Gene names Grik5

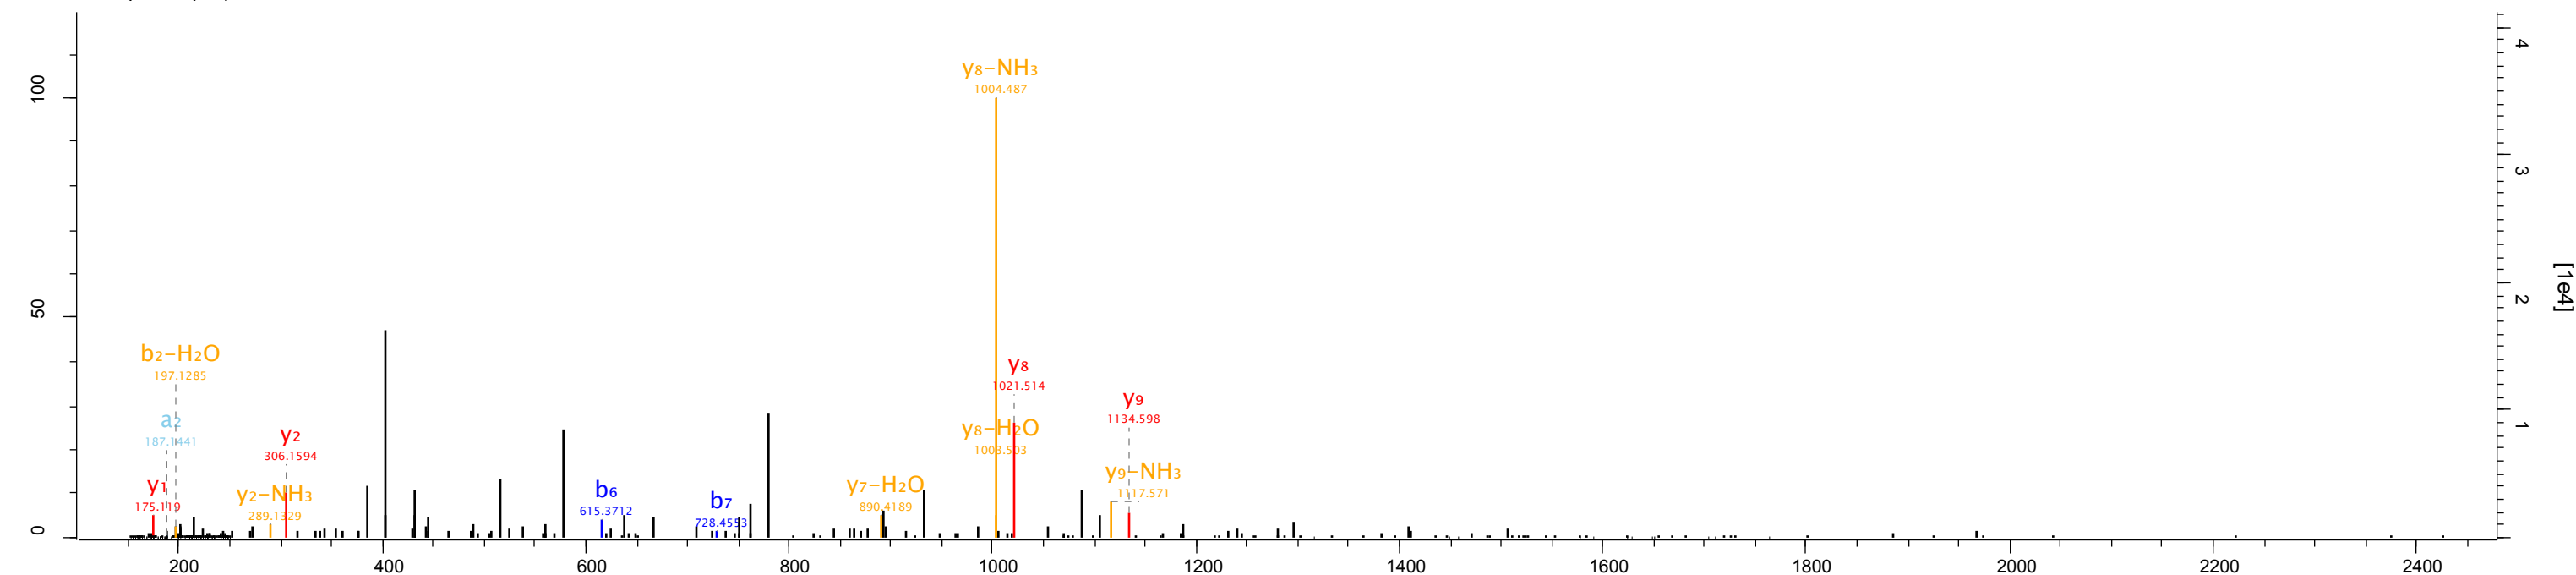

- T L V V T T I L E N P Y V M R -

Fragmentation mapping:  
-  $a_2$  (L)  
-  $b_6$  (T) -  $b_7$  (I)  
-  $y_9$  (I) -  $y_8$  (L)  
-  $y_2$  (M) -  $y_1$  (R)

Raw file  
20150307\_Hepa2\_Top\_opt\_D2\_01\_1686

Scan 42293 Method TOF; CID Score 66.99 m/z 503.26 Gene names Slc35e1

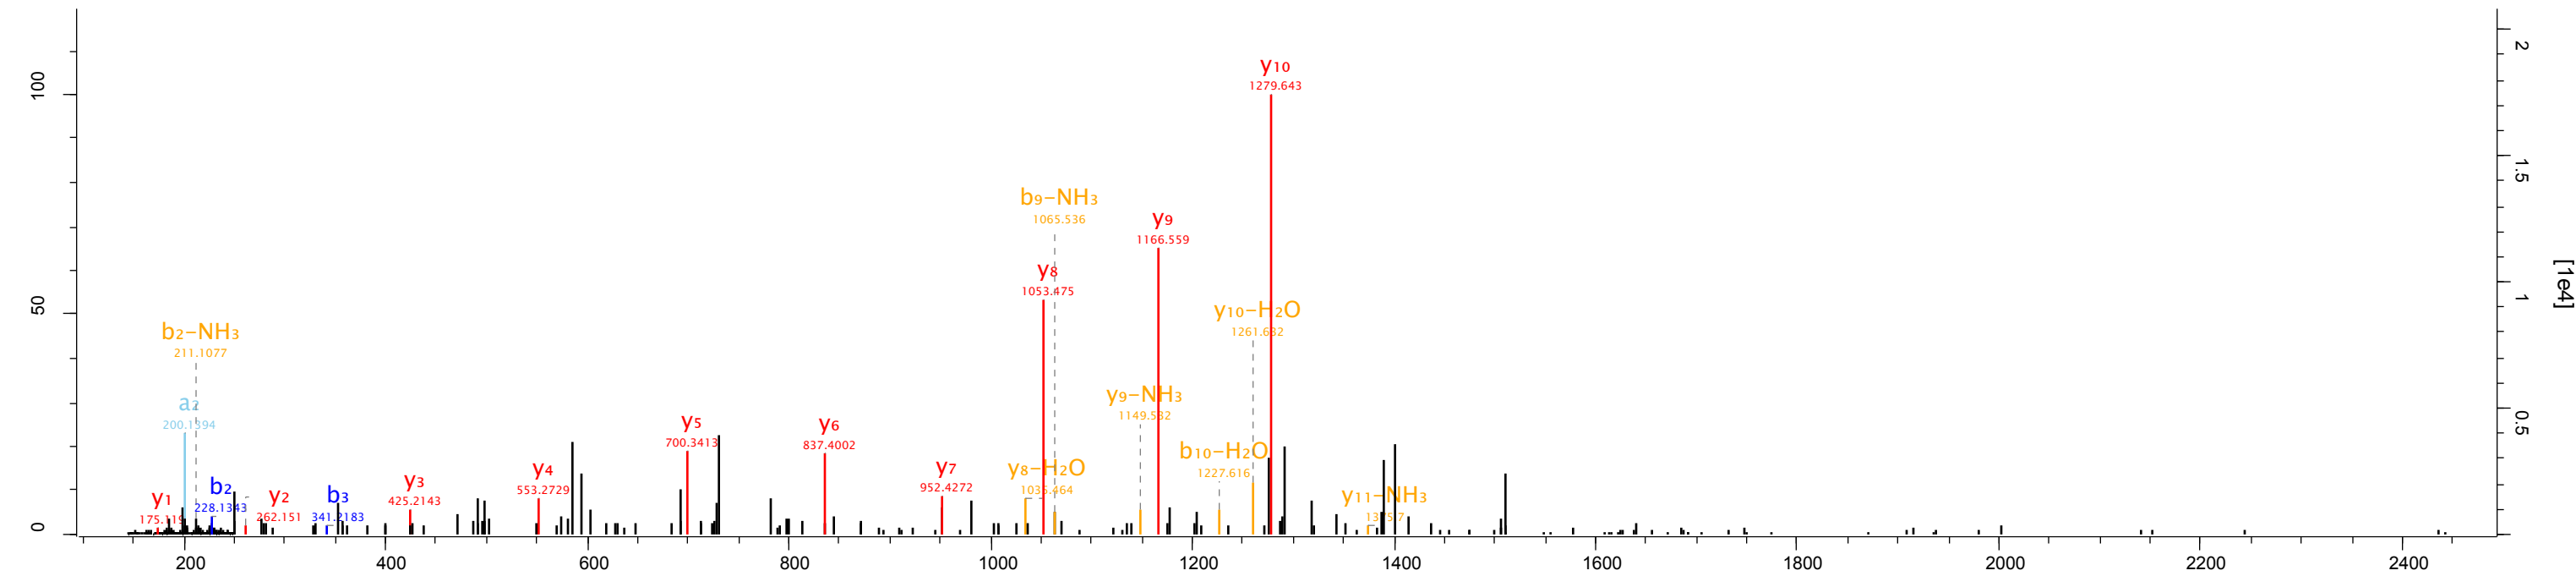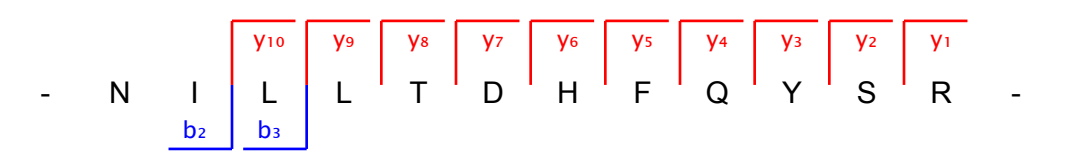

Raw file  
20150307\_Hepa2\_Top\_opt\_D2\_01\_1686

Scan 47373 Method TOF; CID Score 48.22 m/z 596.31 Gene names Vps72

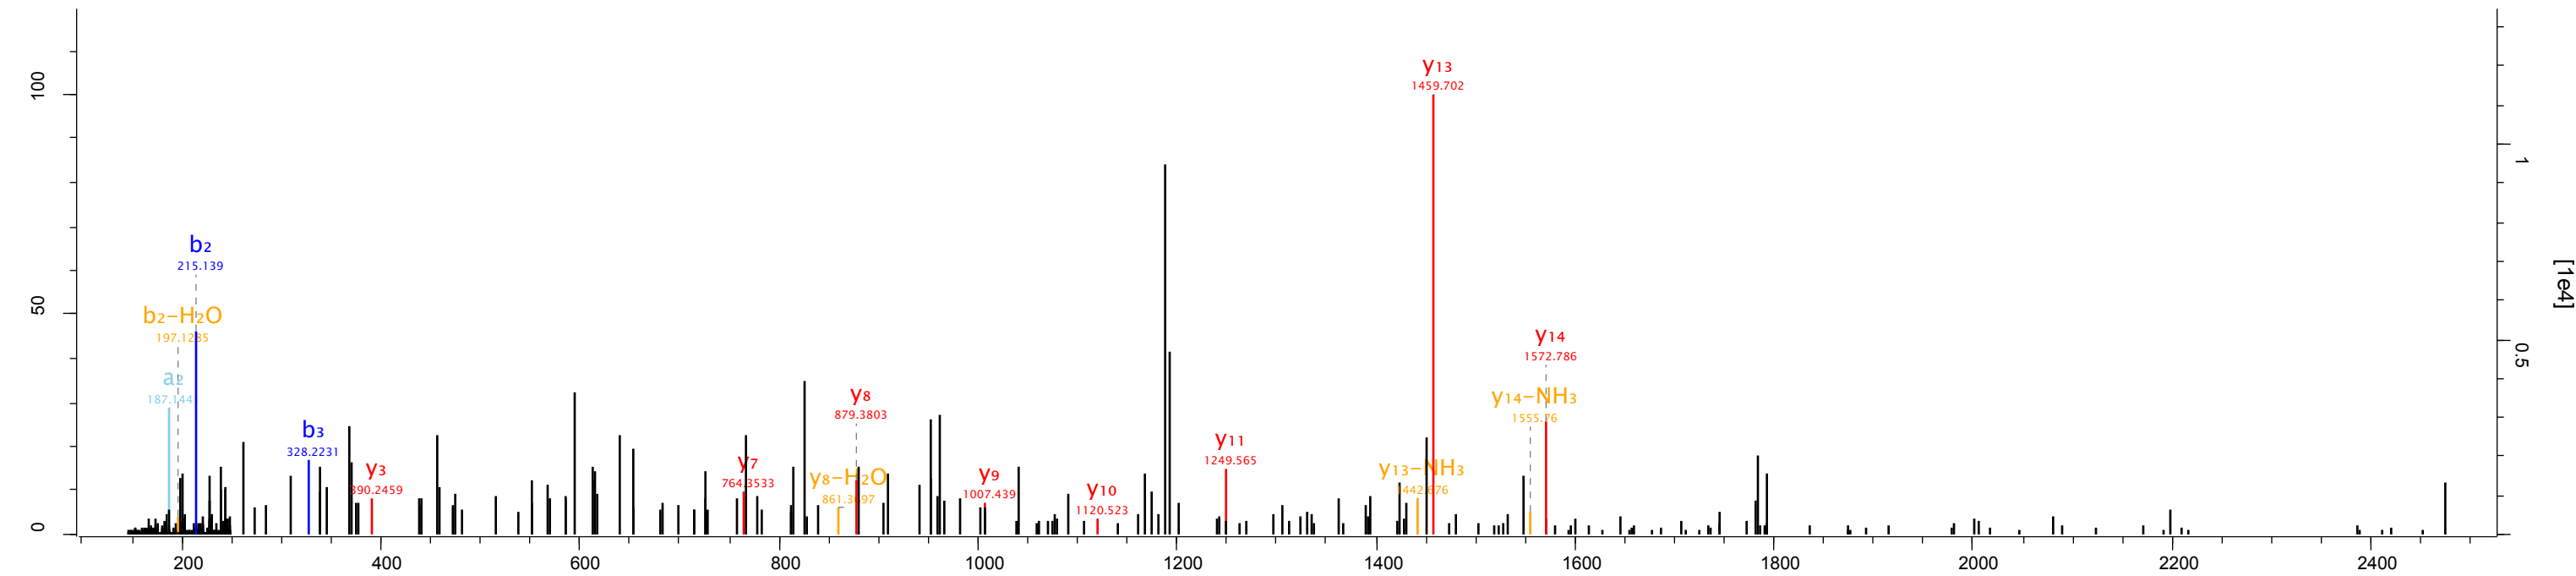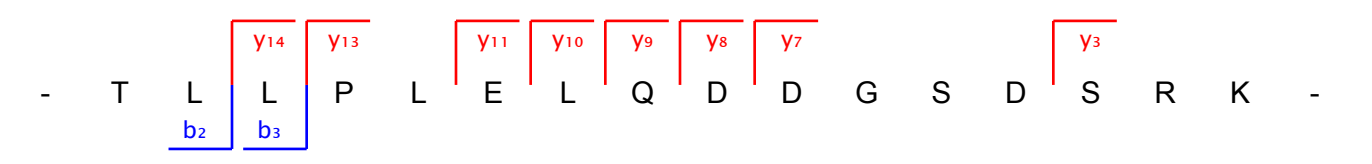

Raw file 20150307\_Hepa2\_Top\_opt\_D2\_01\_1686 Scan 47636 Method TOF; CID Score 109.72 m/z 1008.46 Gene names Rhbdd1

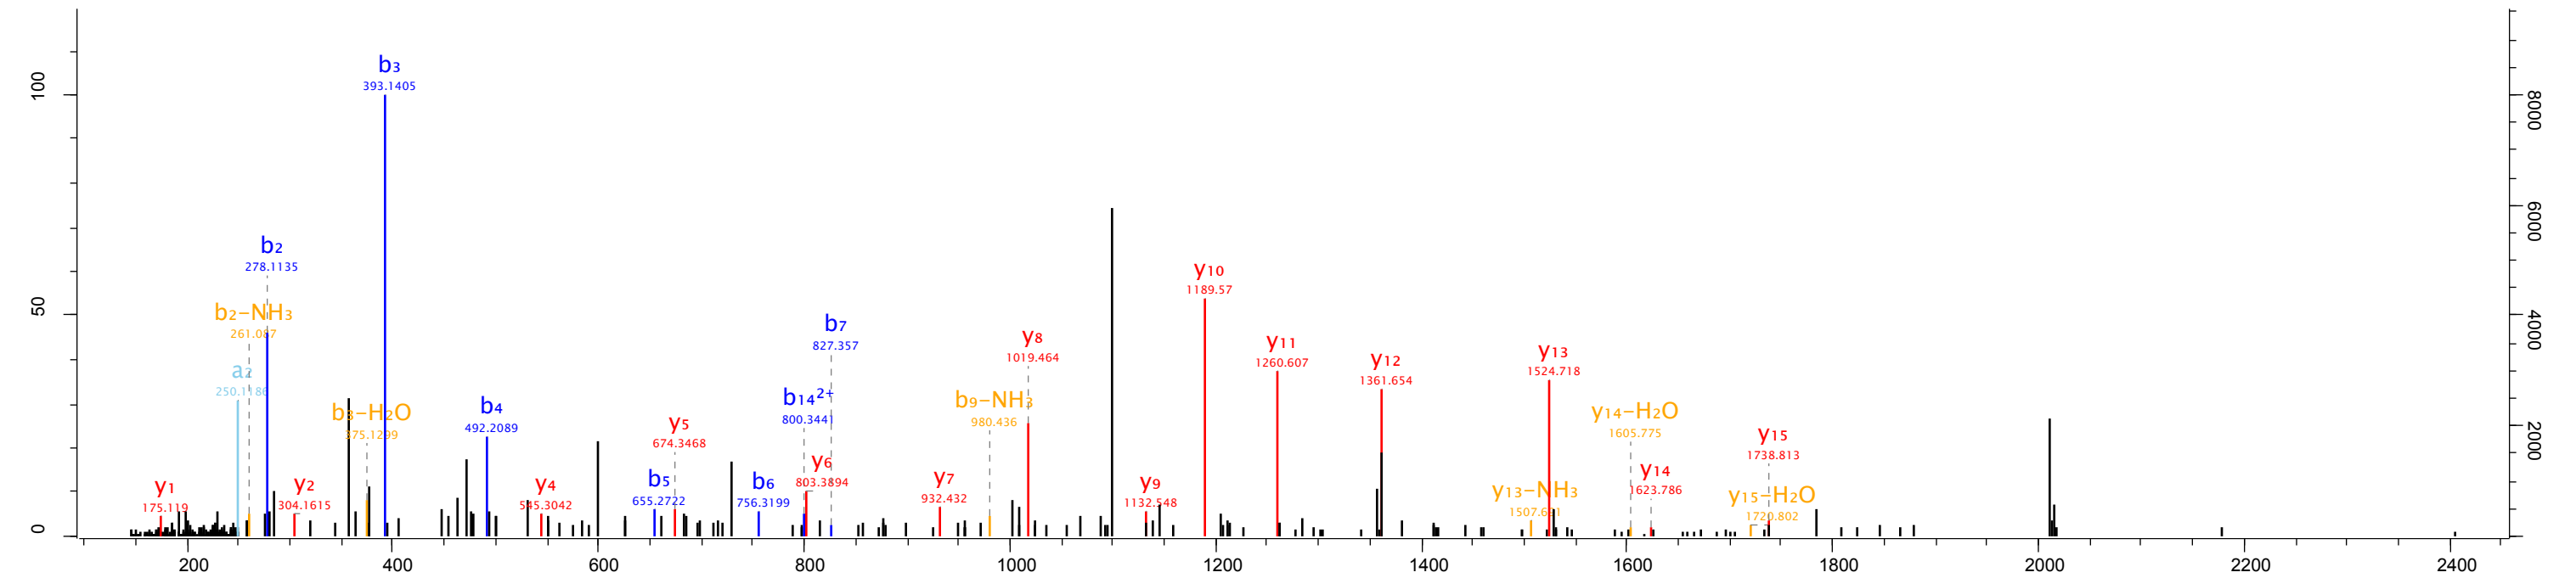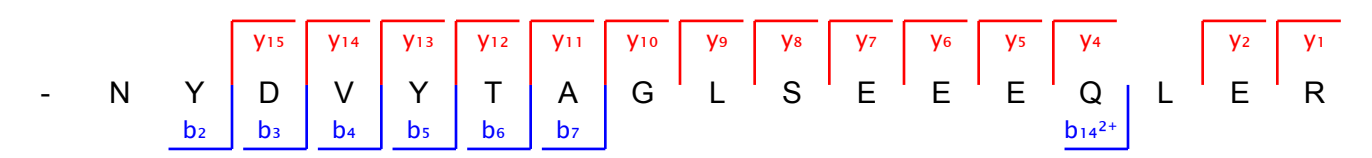



Raw file: 20150307\_Hepa2\_Top\_opt\_D2\_01\_1686  
 Scan: 47760 Method: TOF; CID Score: 65.92 m/z: 725.35 Gene names: Stard4

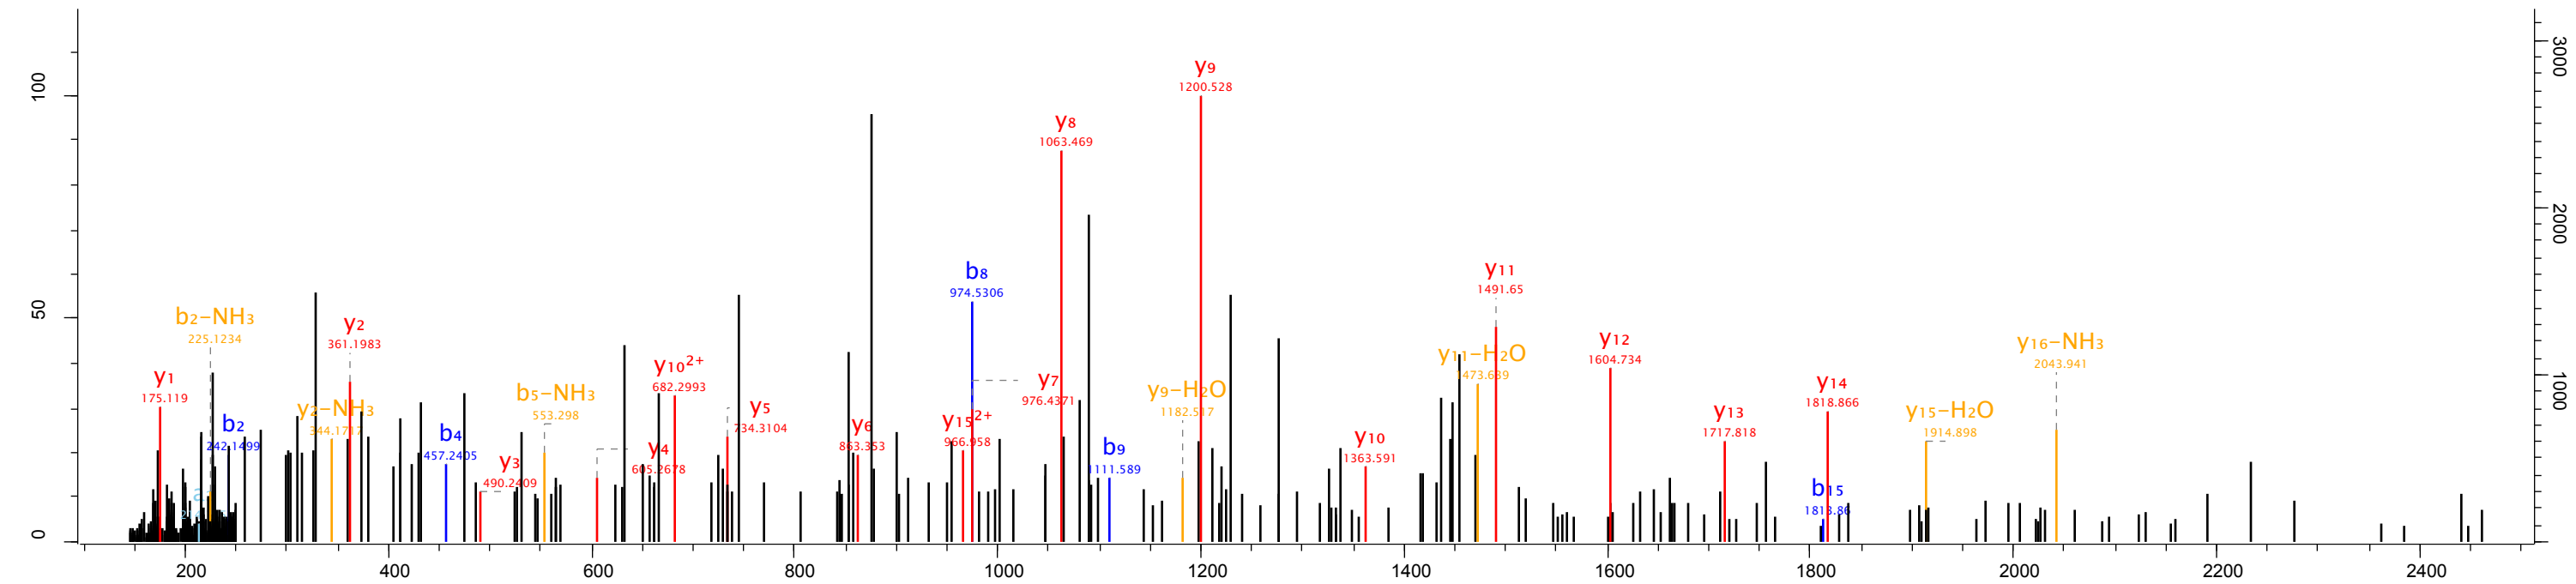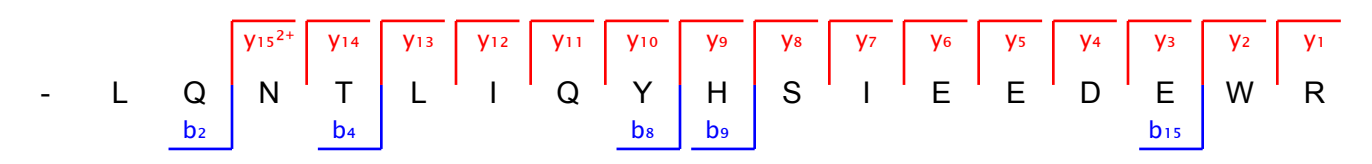

Raw file  
20150307\_Hepa2\_Top\_opt\_D2\_01\_1686

Scan 47804 Method TOF; CID Score 77.51 m/z 894.46 Gene names Biccl1

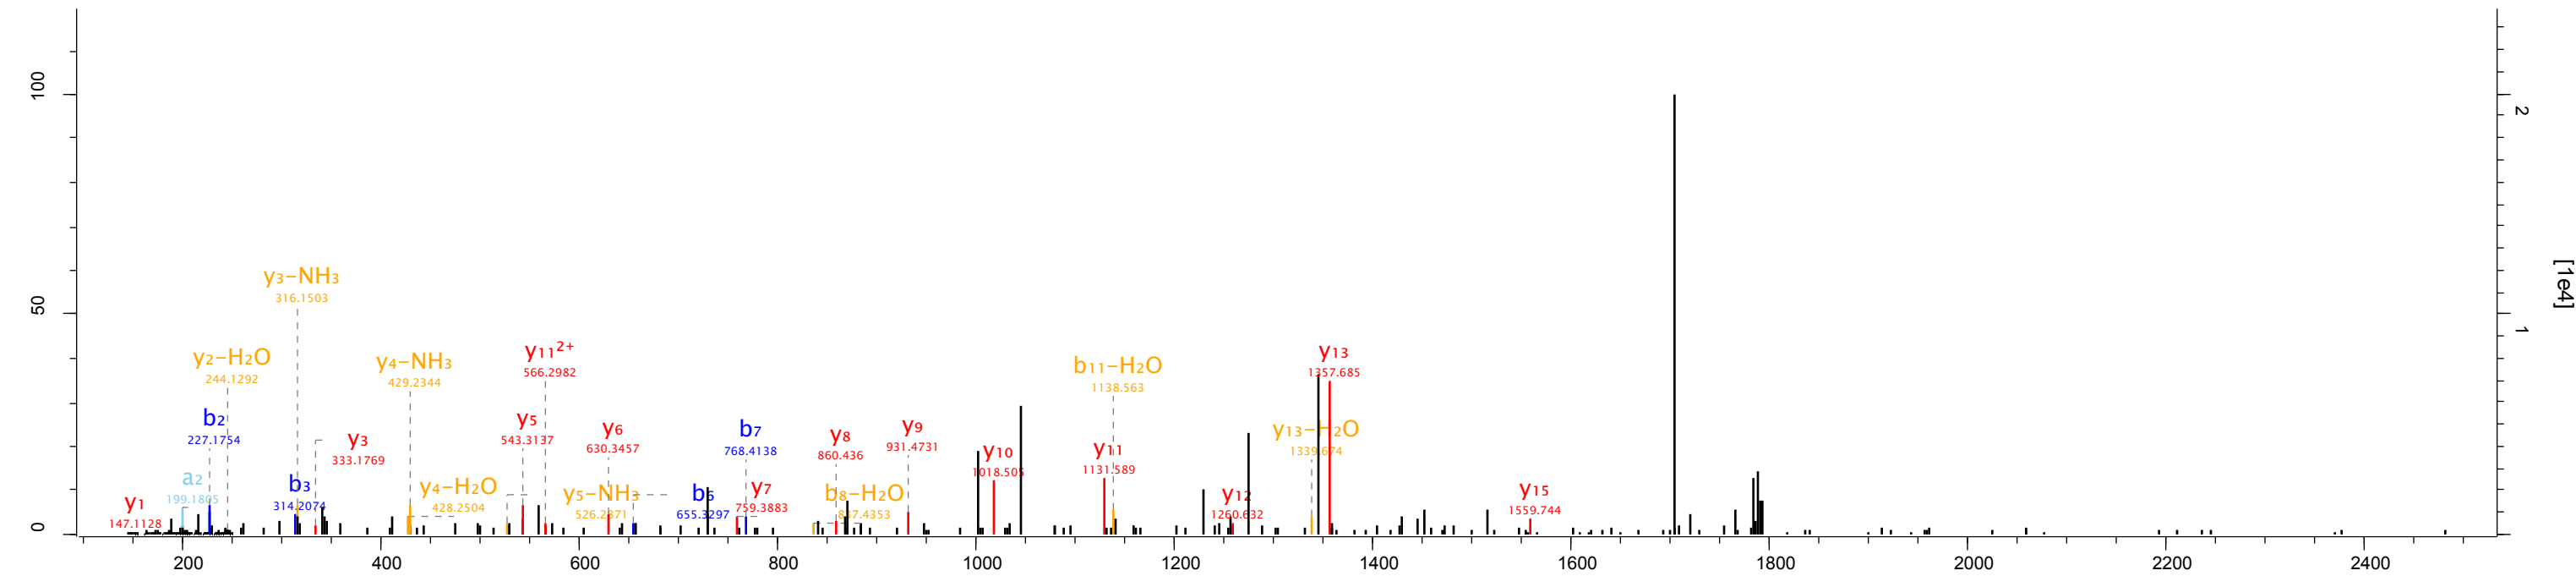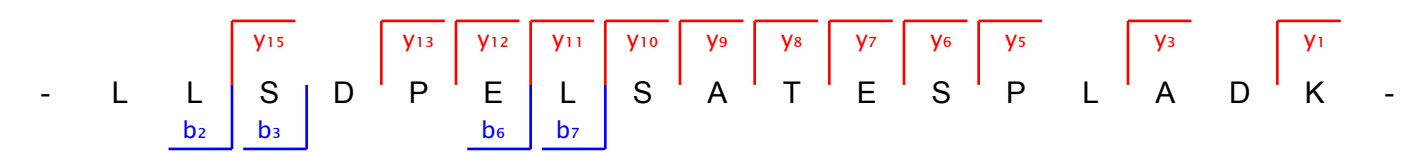

Raw file 20150307\_Hepa2\_Top\_opt\_D2\_01\_1686 Scan 51692 Method TOF; CID Score 70.45 m/z 764.39 Gene names Tmppe

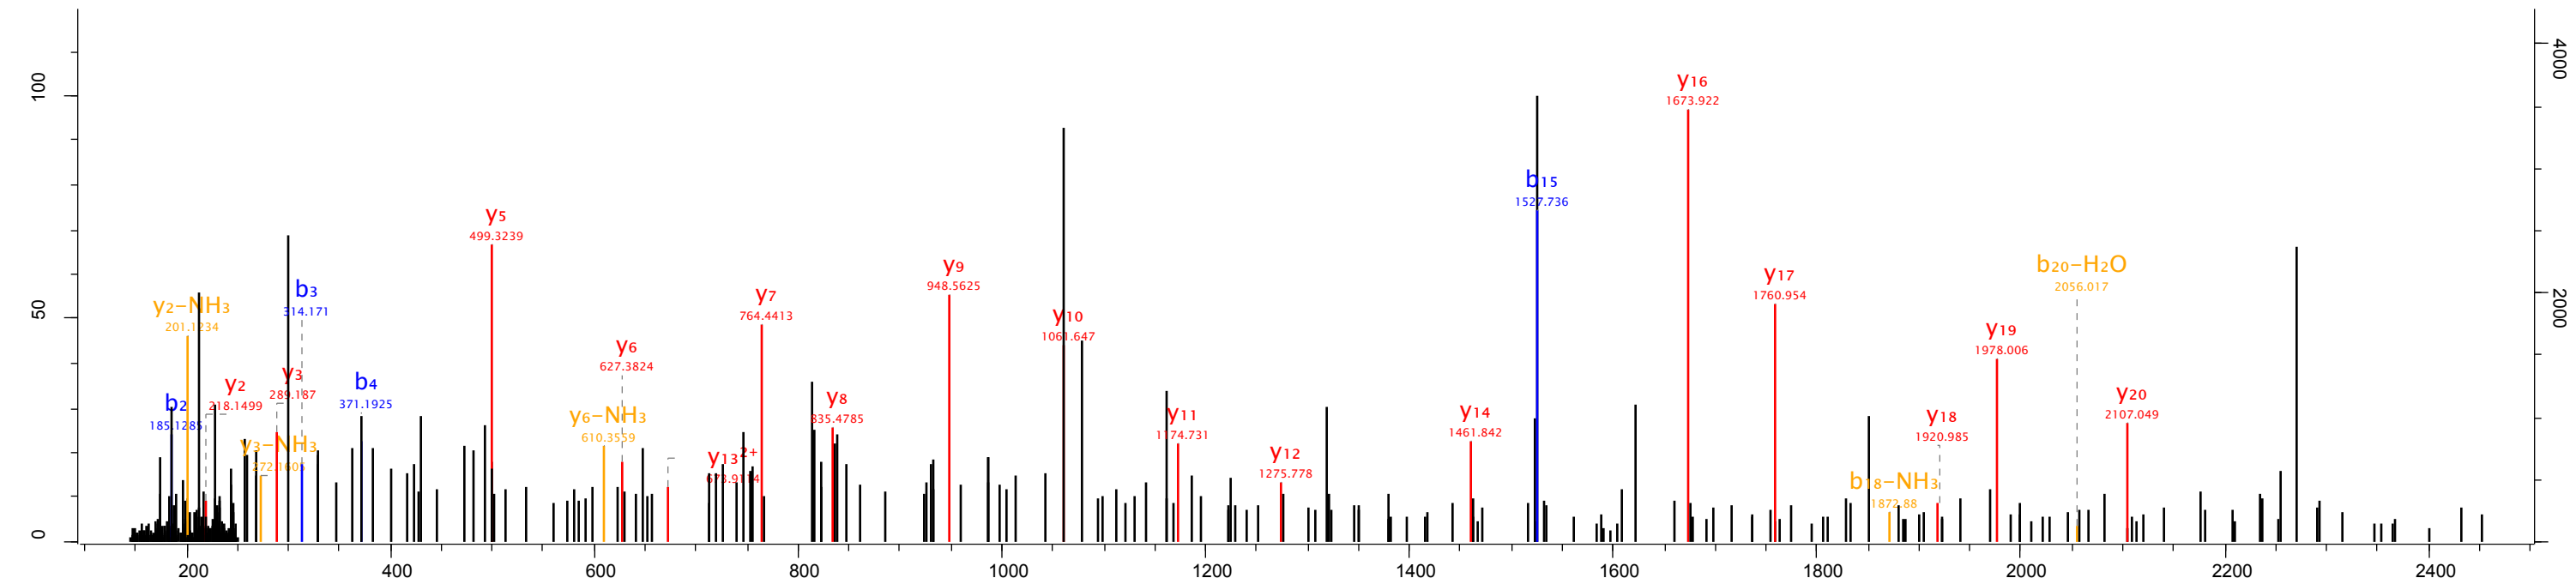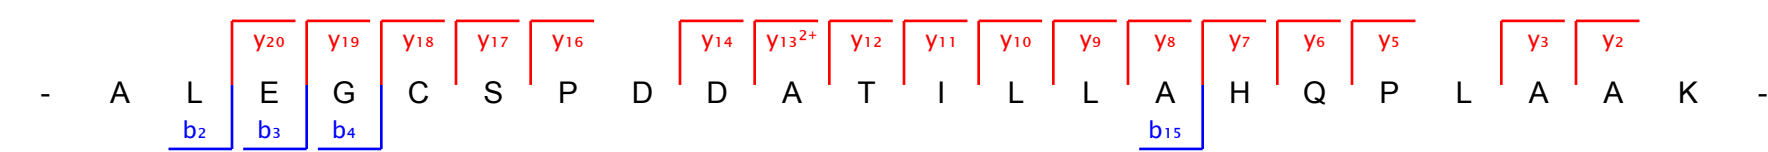

Raw file 20150307\_Hepa2\_Top\_opt\_D2\_01\_1686 Scan 53274 Method TOF; CID Score 76.23 m/z 595.83 Gene names Ggact

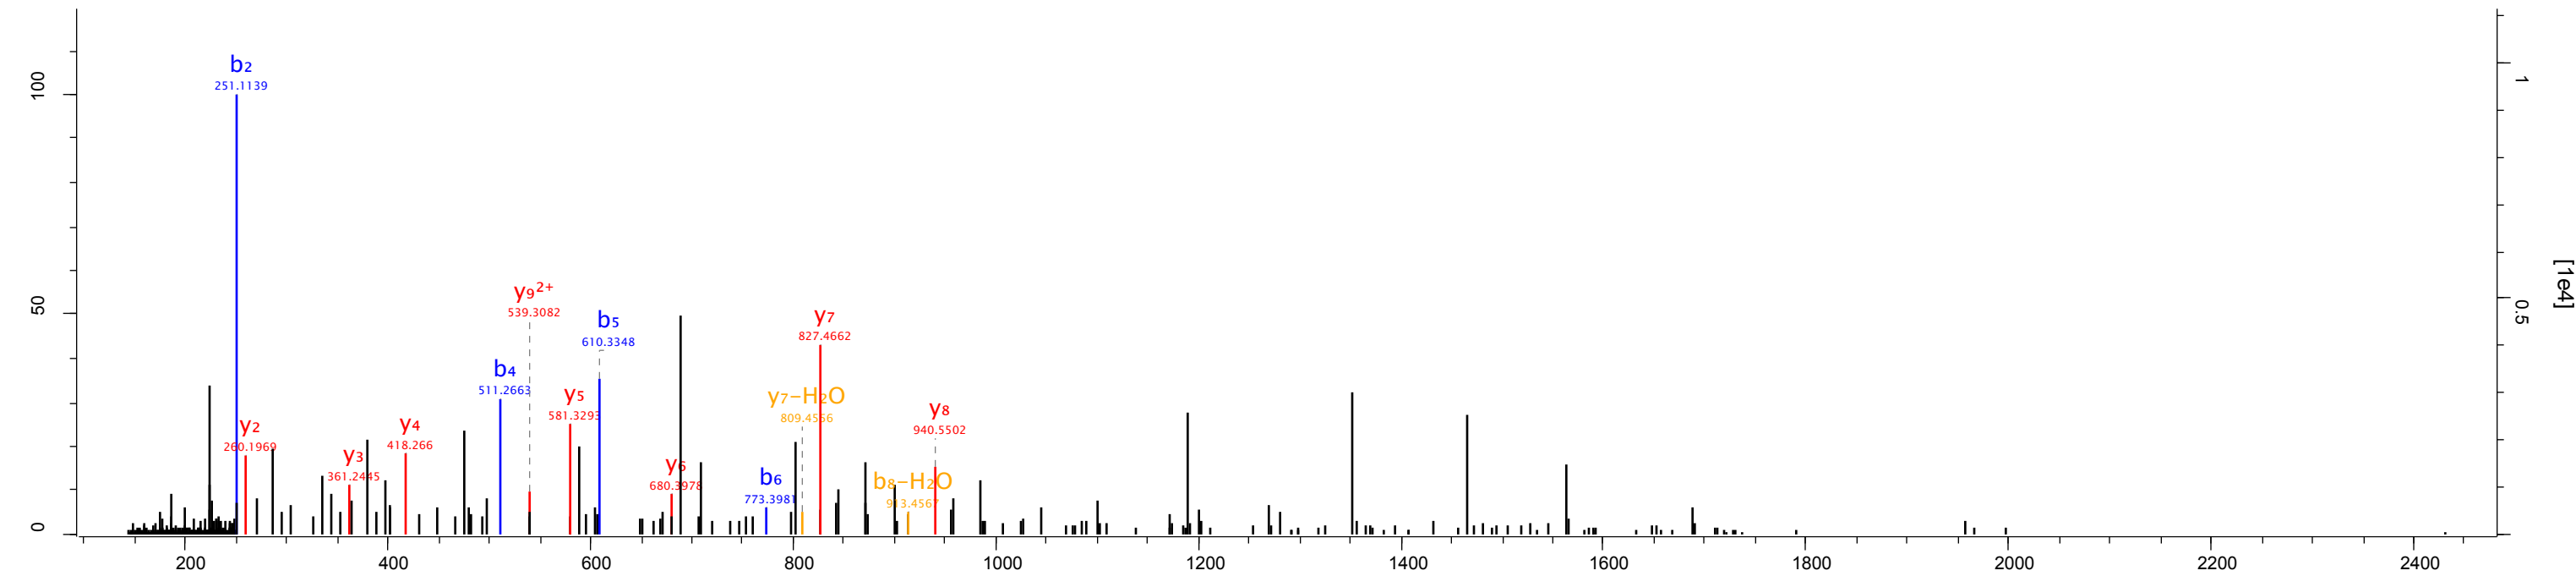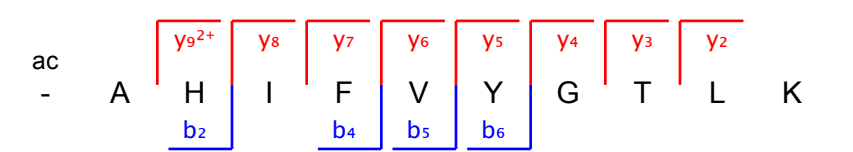

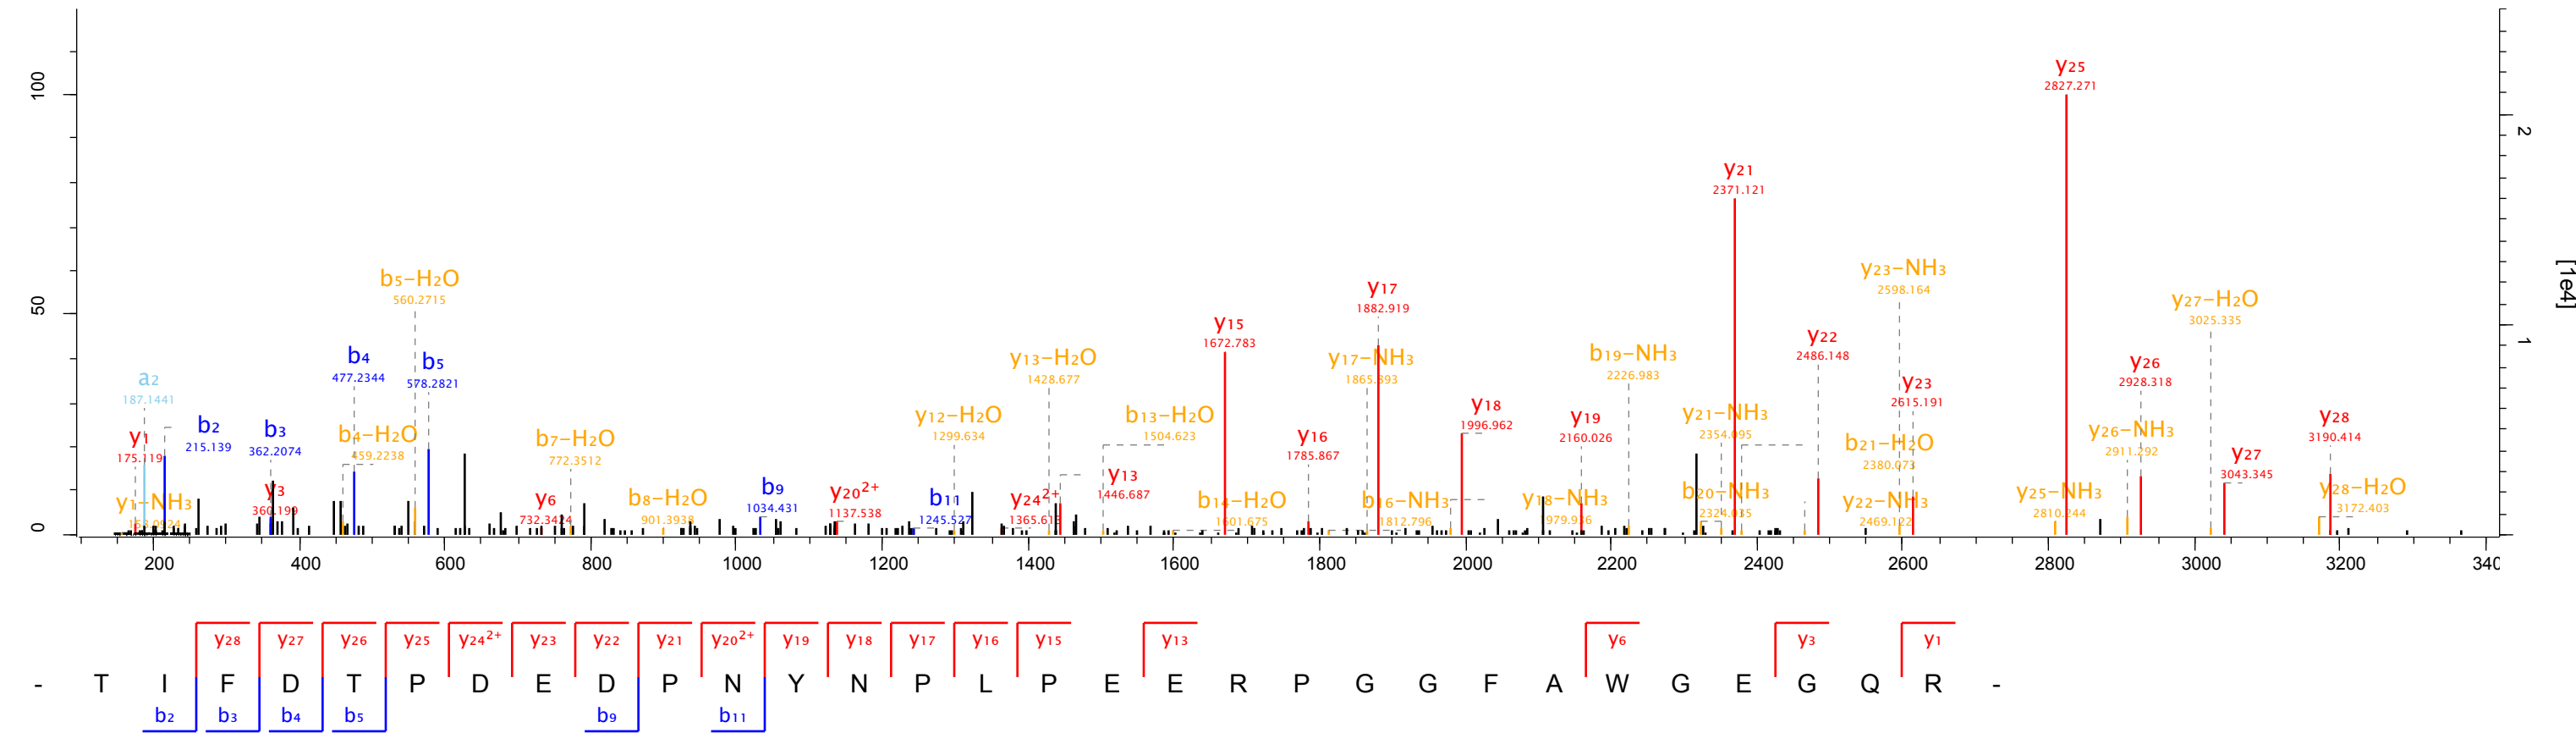

Raw file  
20150307\_Hepa2\_Top\_opt\_D2\_01\_1686

Scan 61589 Method TOF; CID Score 77.47 m/z 762.4 Gene names Mthfsd

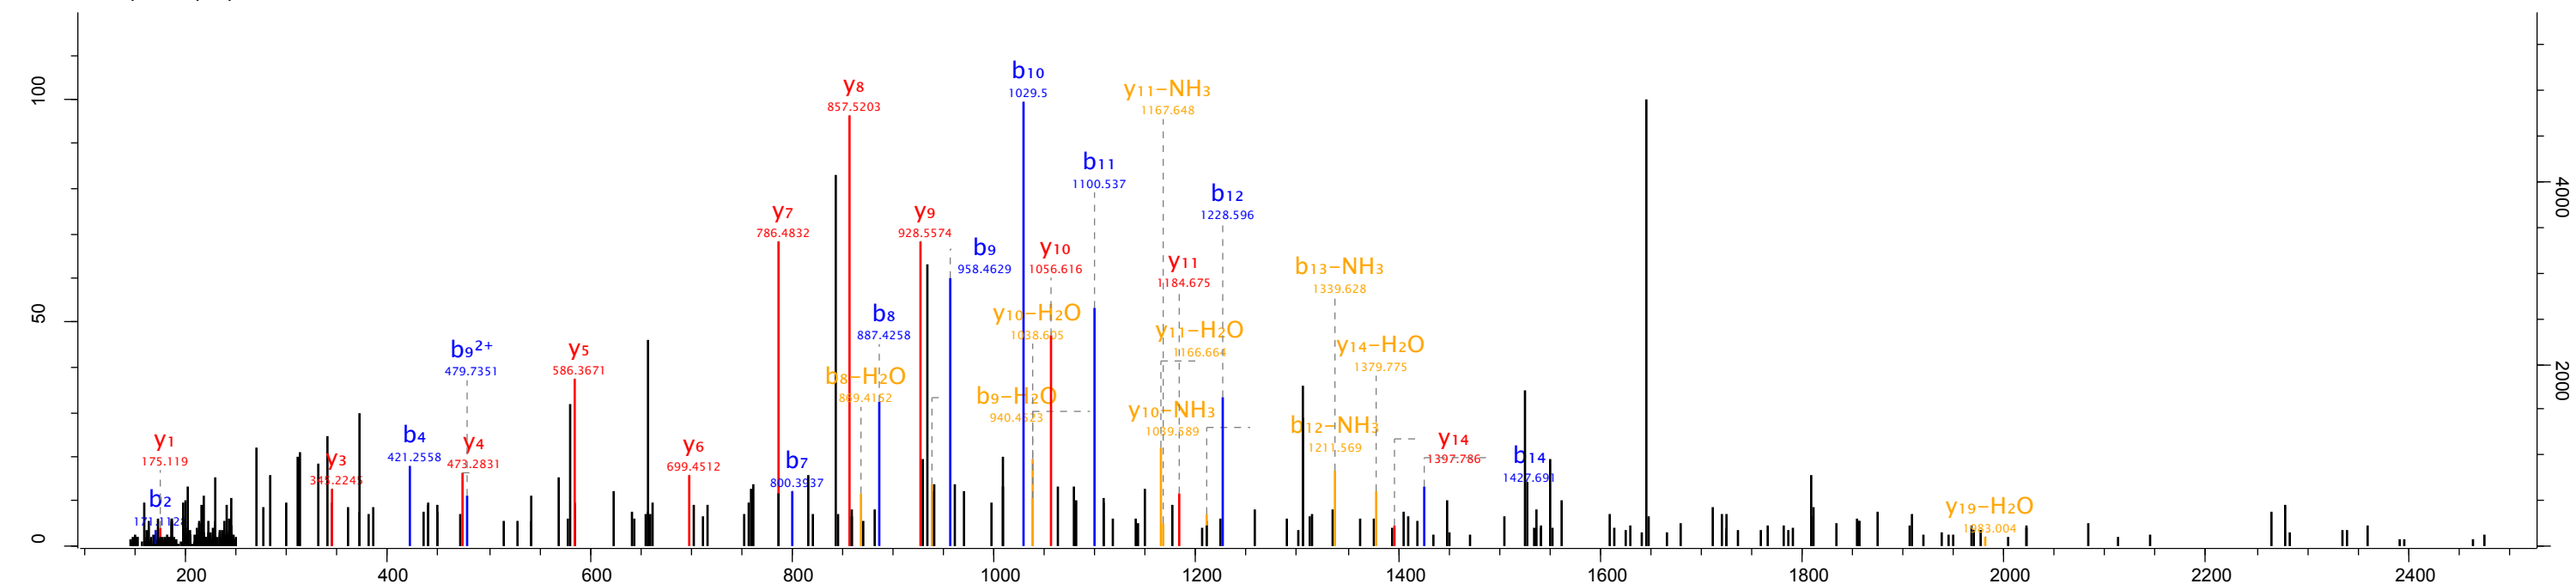

- A V L H Y T D S A A A Q Q A A S L L Q G L R -  
          **b<sub>2</sub>**          **b<sub>4</sub>**          **b<sub>7</sub>** **b<sub>8</sub>** **b<sub>9</sub>** **b<sub>10</sub>** **b<sub>11</sub>** **b<sub>12</sub>**          **b<sub>14</sub>**  
                          **y<sub>14</sub>**          **y<sub>11</sub>** **y<sub>10</sub>** **y<sub>9</sub>** **y<sub>8</sub>** **y<sub>7</sub>** **y<sub>6</sub>** **y<sub>5</sub>** **y<sub>4</sub>** **y<sub>3</sub>**          **y<sub>1</sub>**

Raw file: 20150307\_Hepa2\_Top\_opt\_D2\_01\_1686  
 Scan: 62047 Method: TOF; CID Score: 135.38 m/z: 754.69 Gene names: Cnih4

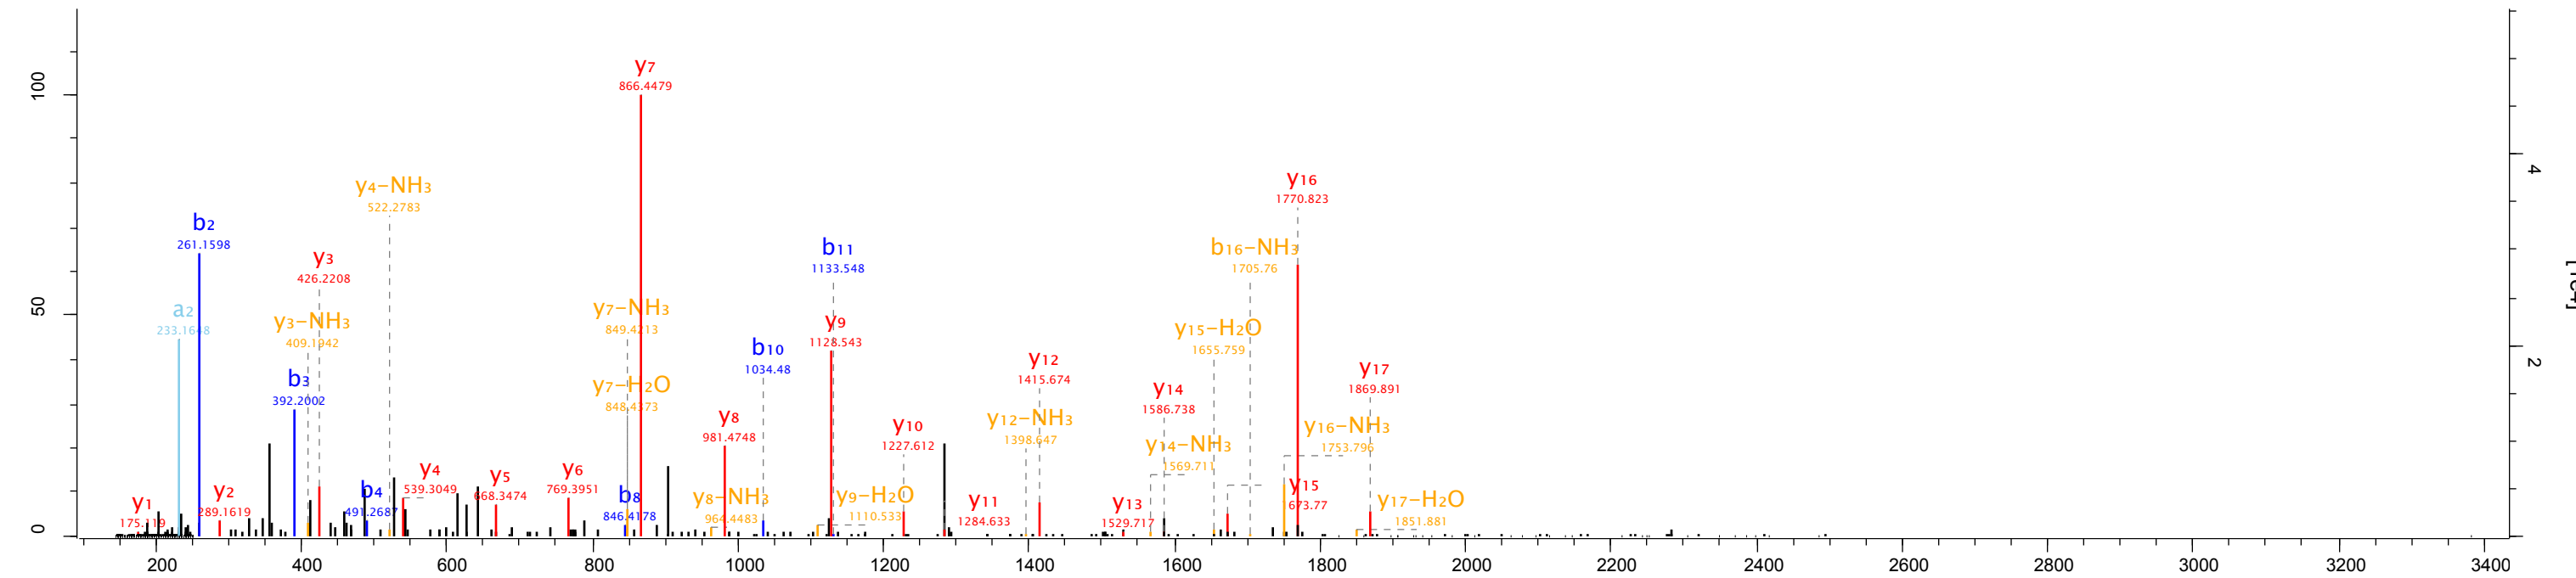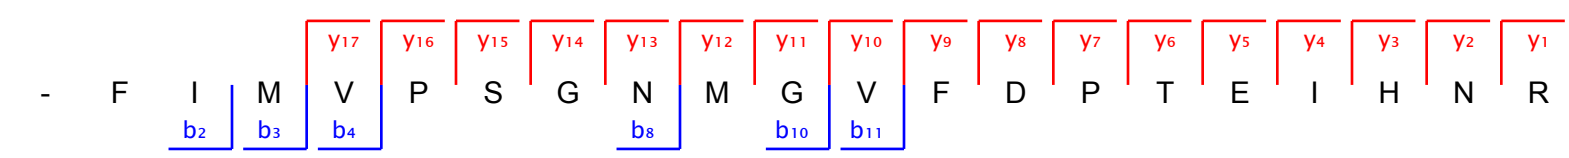

Raw file  
20150307\_Hepa2\_Top\_opt\_D2\_01\_1686

Scan 62069 Method TOF; CID Score 88.39 m/z 642.32 Gene names Slc4a4

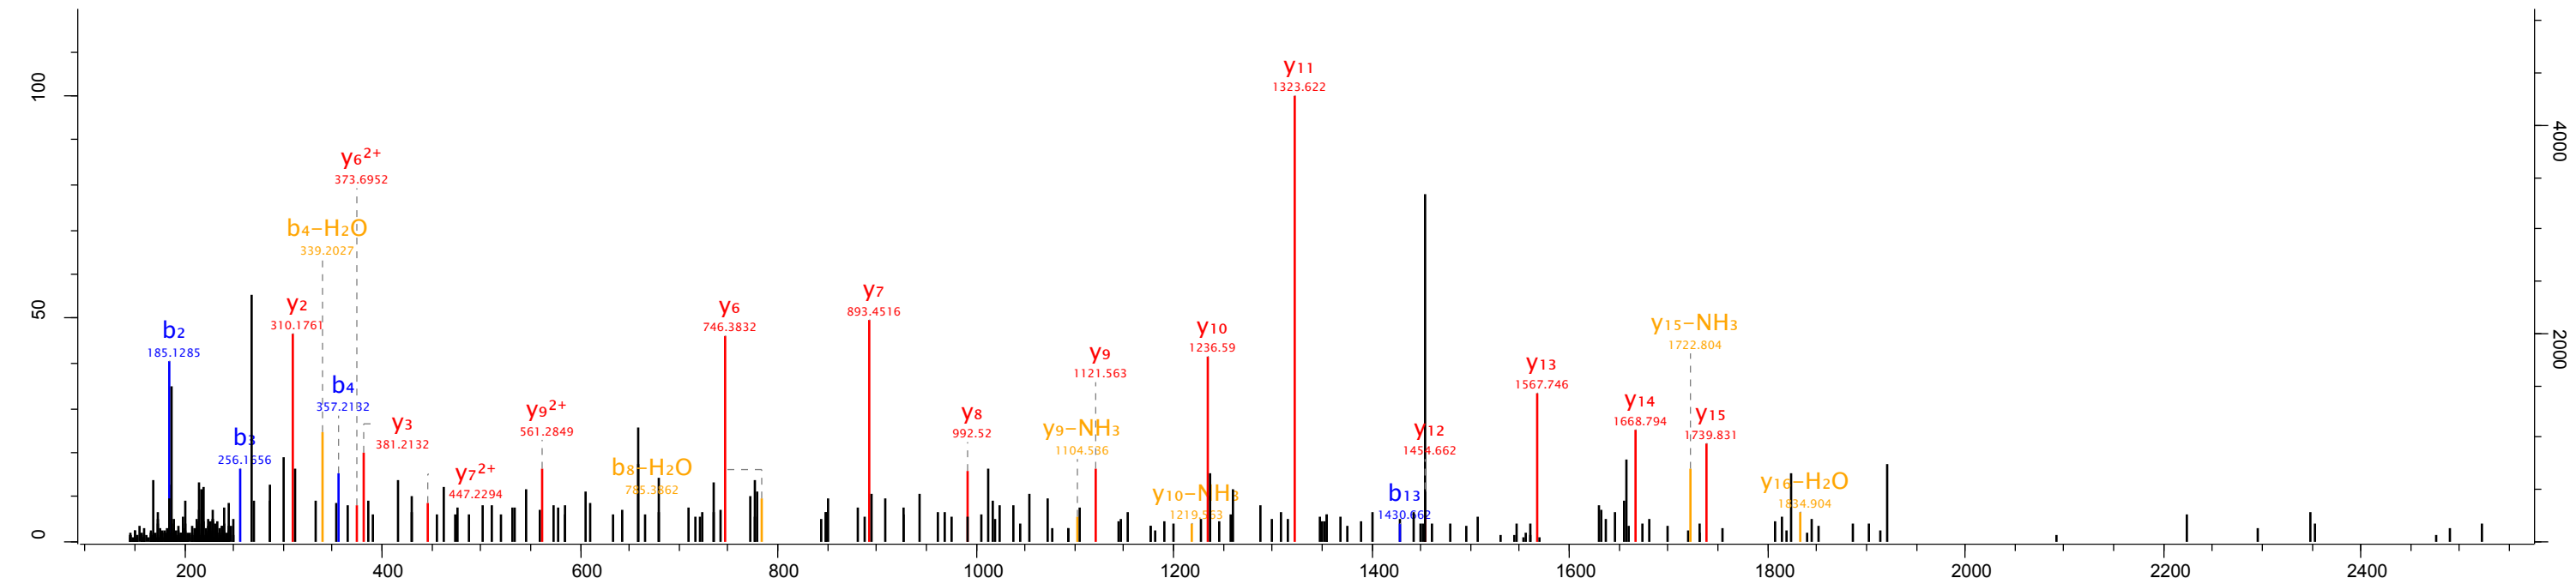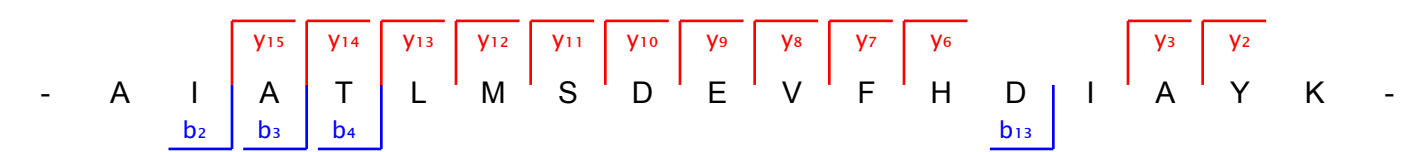



Raw file 20150307\_Hepa2\_Top\_opt\_D2\_01\_1686 Scan 62533 Method TOF; CID Score 66.66 m/z 590.35 Gene names Ryr1

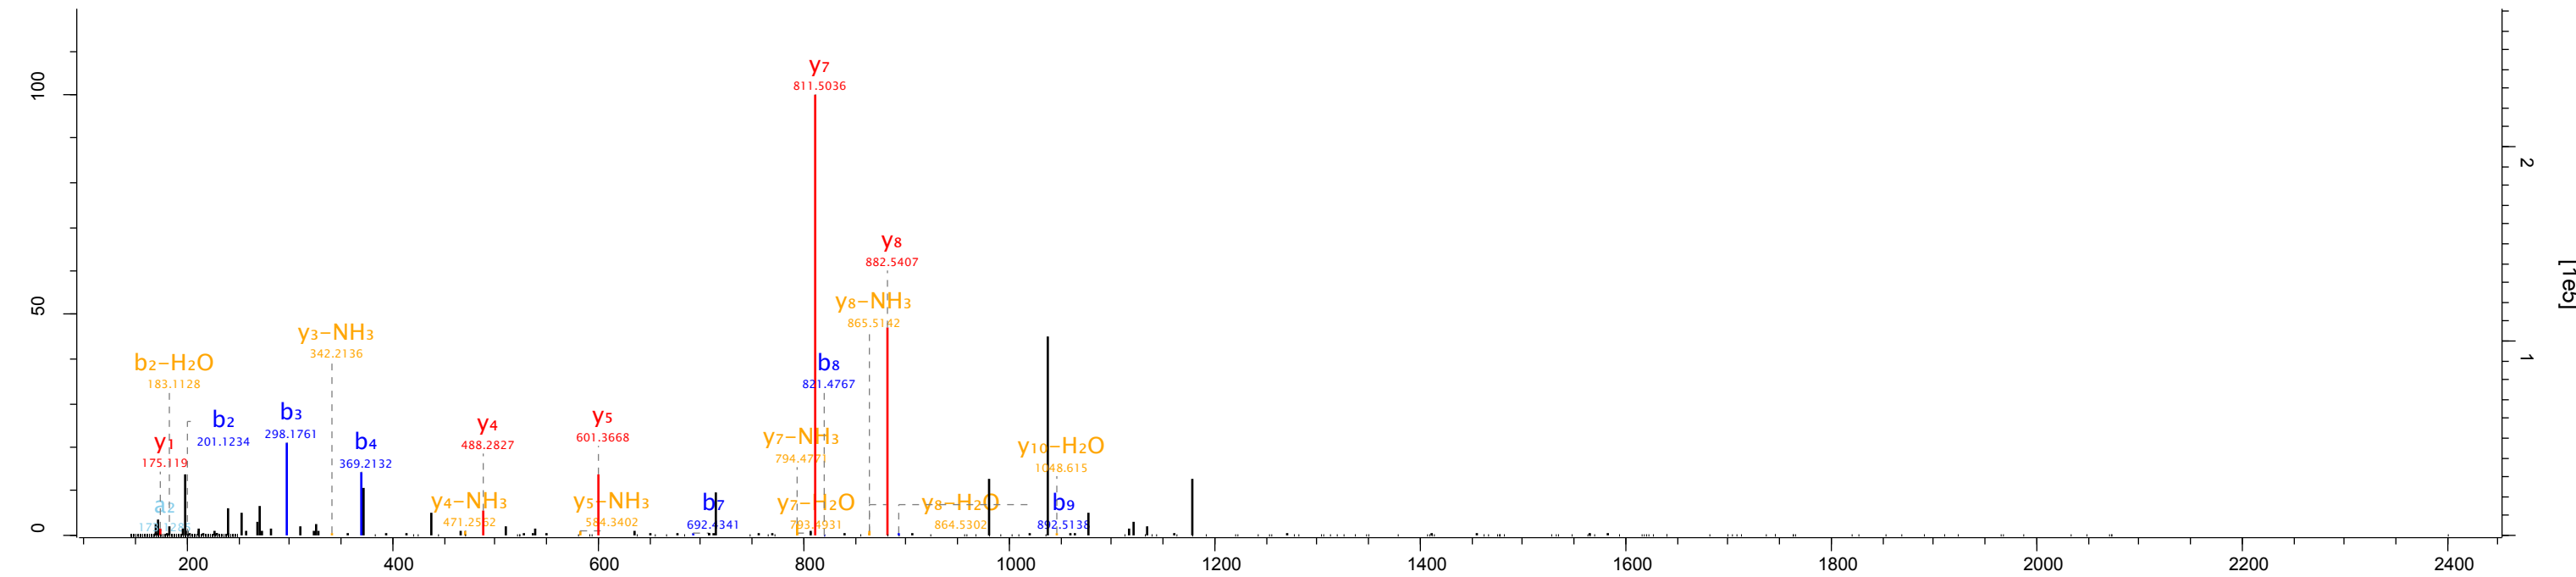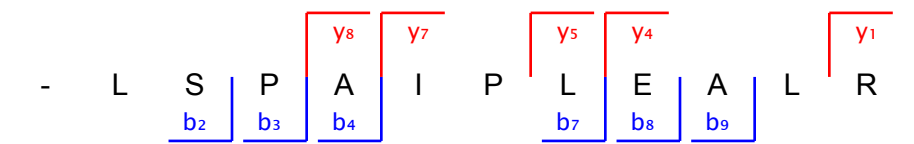

Raw file 20150307\_Hepa2\_Top\_opt\_D2\_01\_1686 Scan 62725 Method TOF; CID Score 72.57 m/z 1083.03 Gene names Aar2

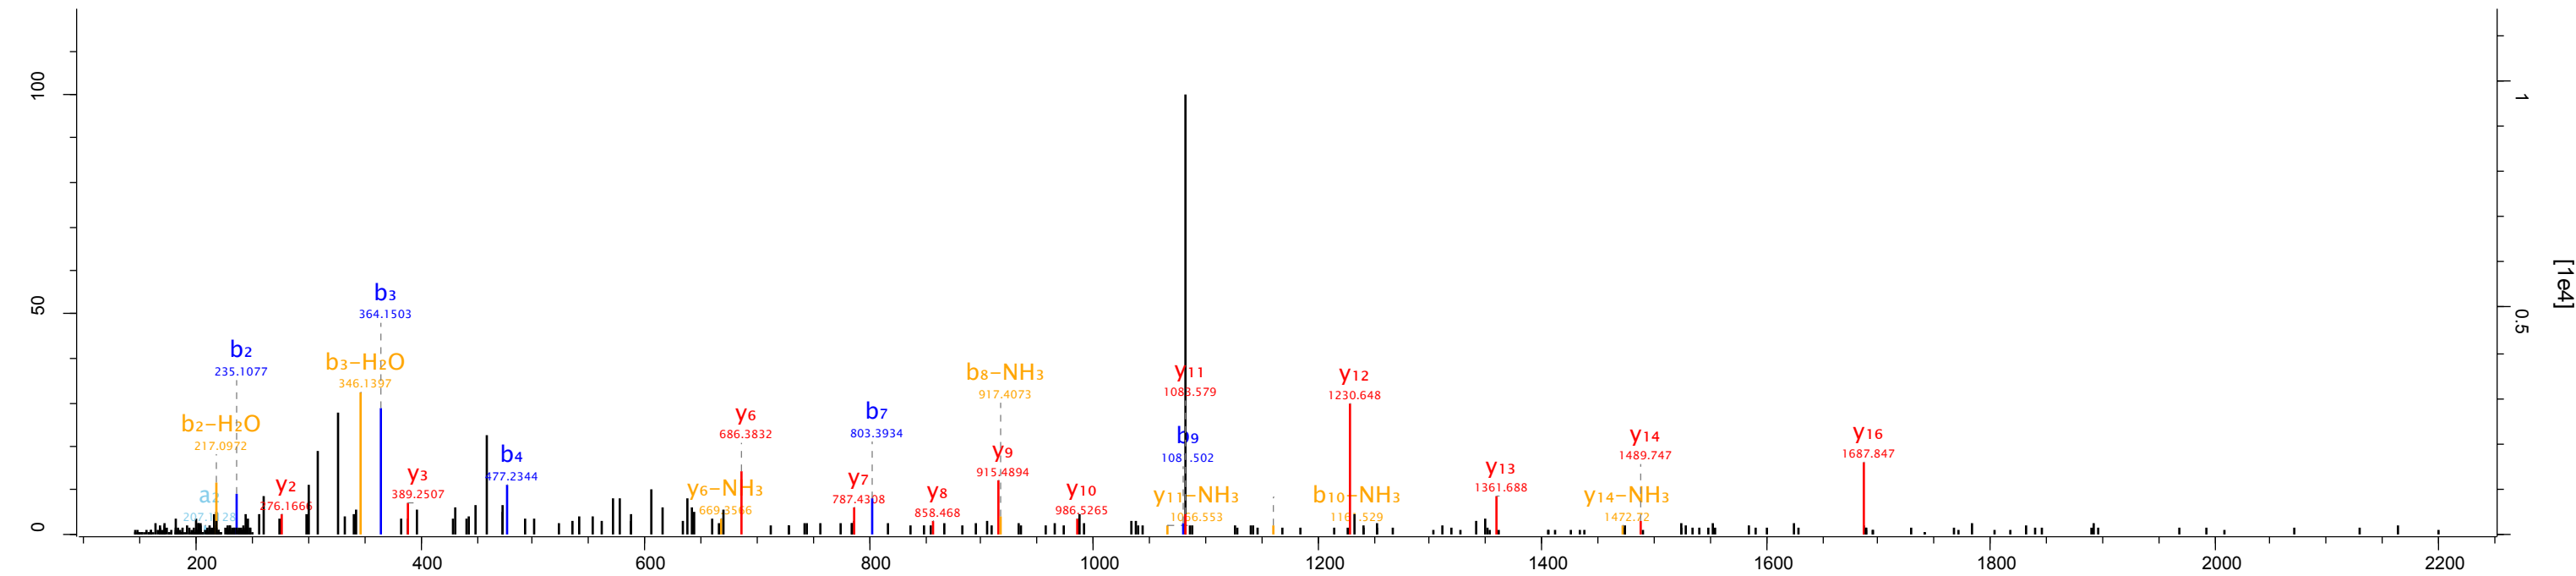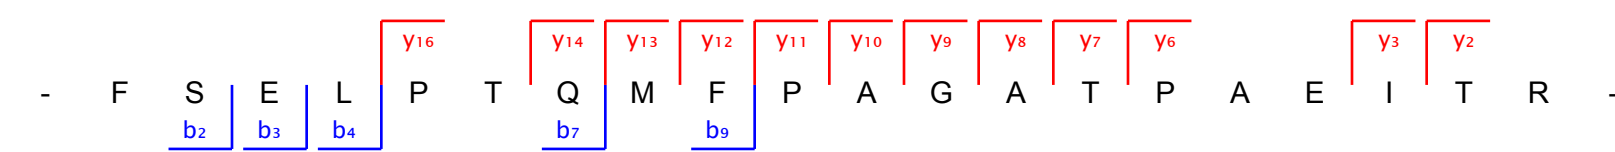

Raw file 20150307\_Hepa2\_Top\_opt\_D2\_01\_1686 Scan 64601 Method TOF; CID Score 50.3 m/z 792.44 Gene names Slc7a11

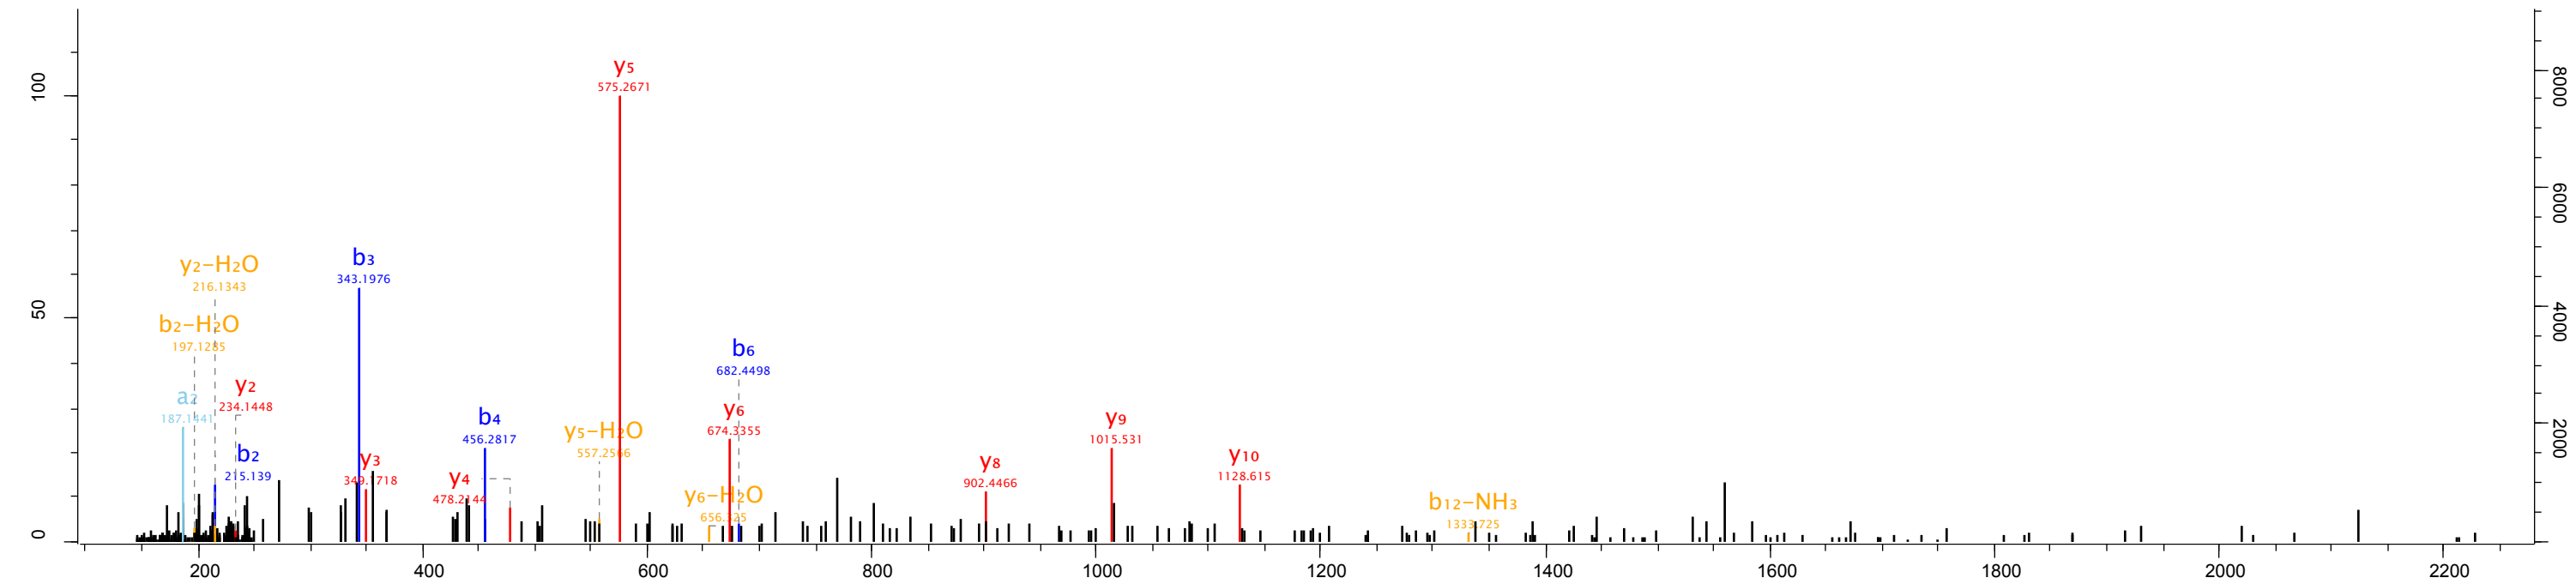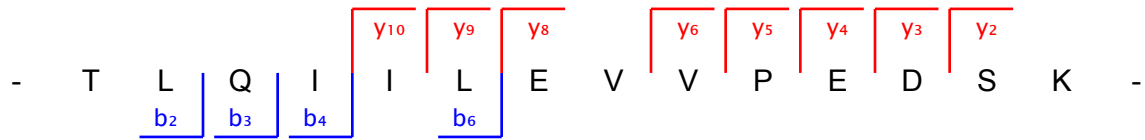

Raw file  
20150307\_Hepa2\_Top\_opt\_D2\_01\_1686

Scan 66815 Method TOF; CID Score 90.15 m/z 521.83 Gene names Pik3ca

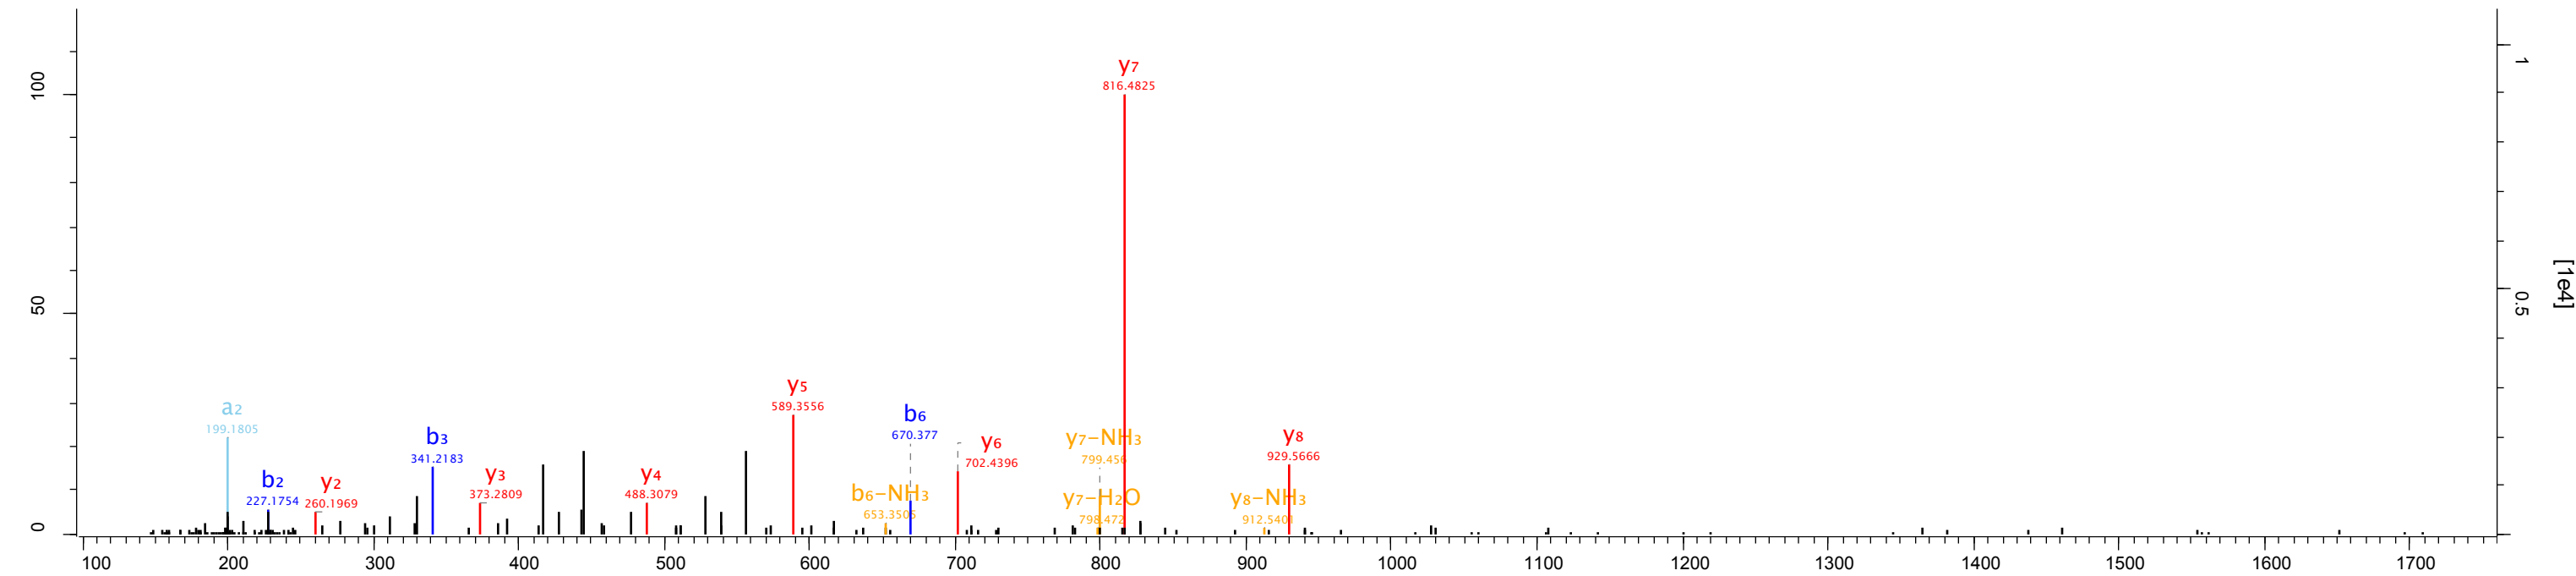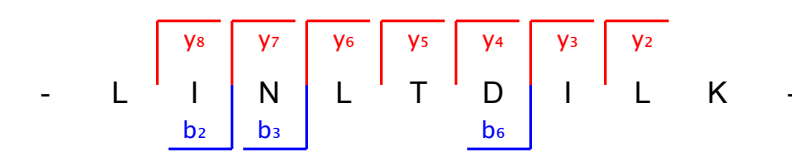

Raw file  
20150307\_Hepa2\_Top\_opt\_D2\_01\_1686

Scan 69259 Method TOF; CID Score 54.28 m/z 835.41 Gene names Cdca7

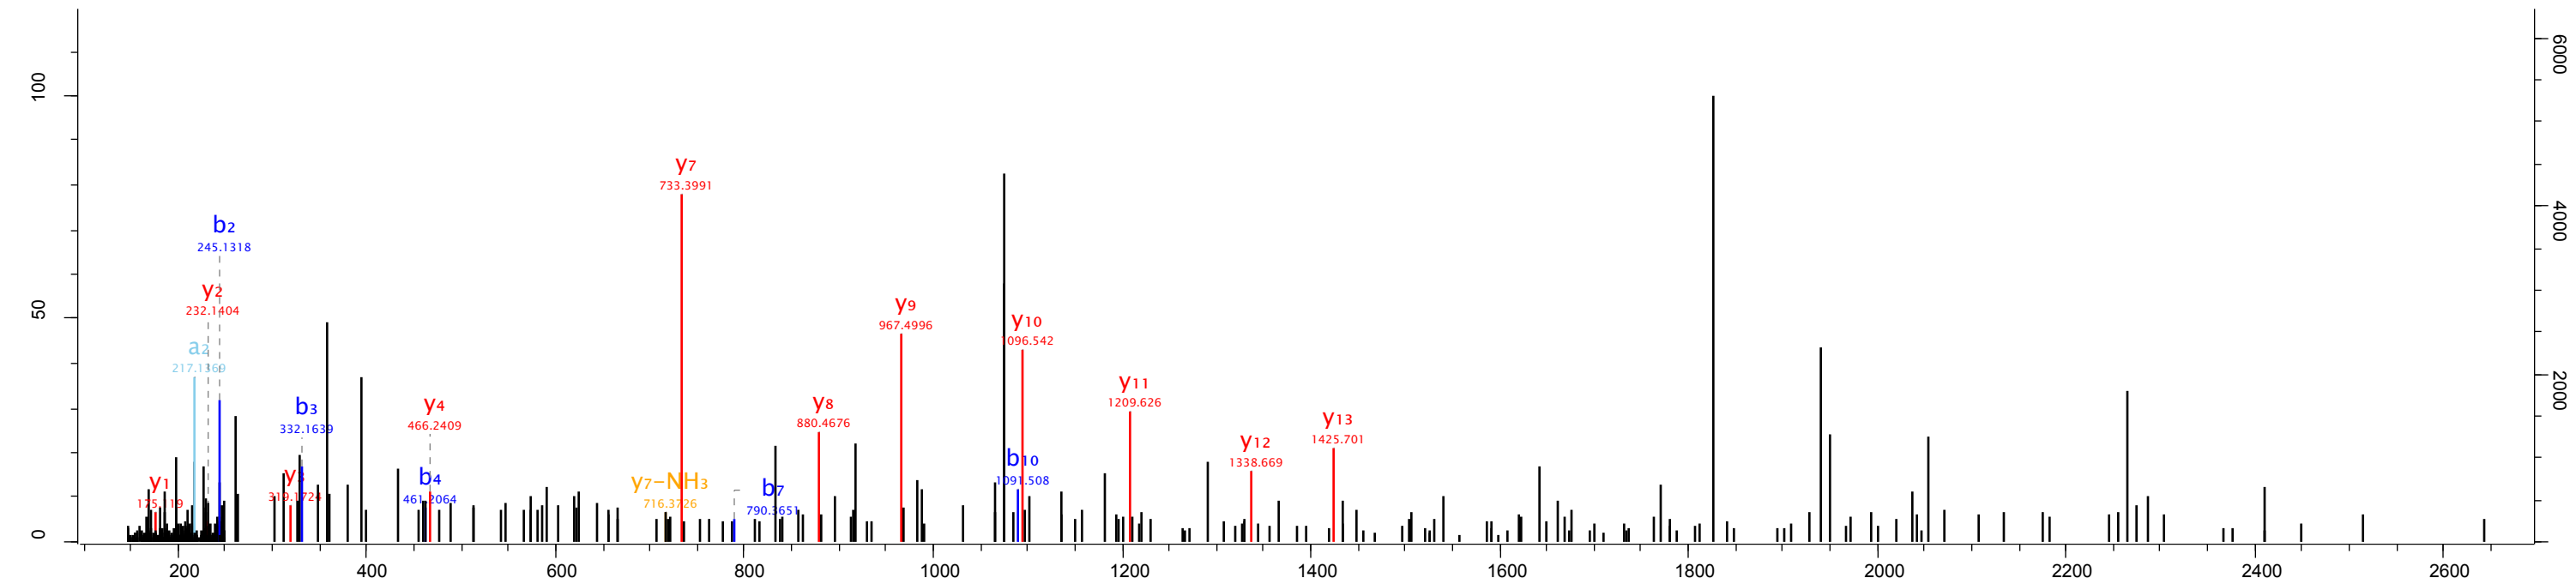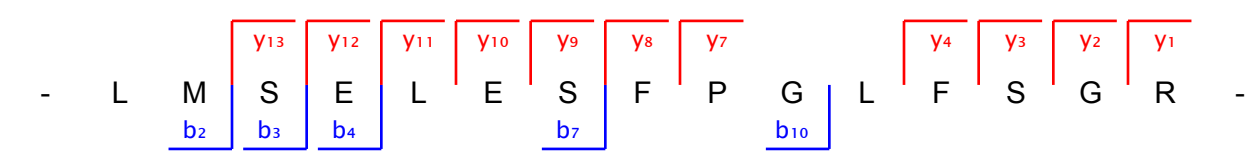

Raw file  
20150307\_Hepa2\_Top\_opt\_D2\_01\_1686

Scan 70480 Method TOF; CID Score 61.96 m/z 1051.24 Gene names Tmem184b

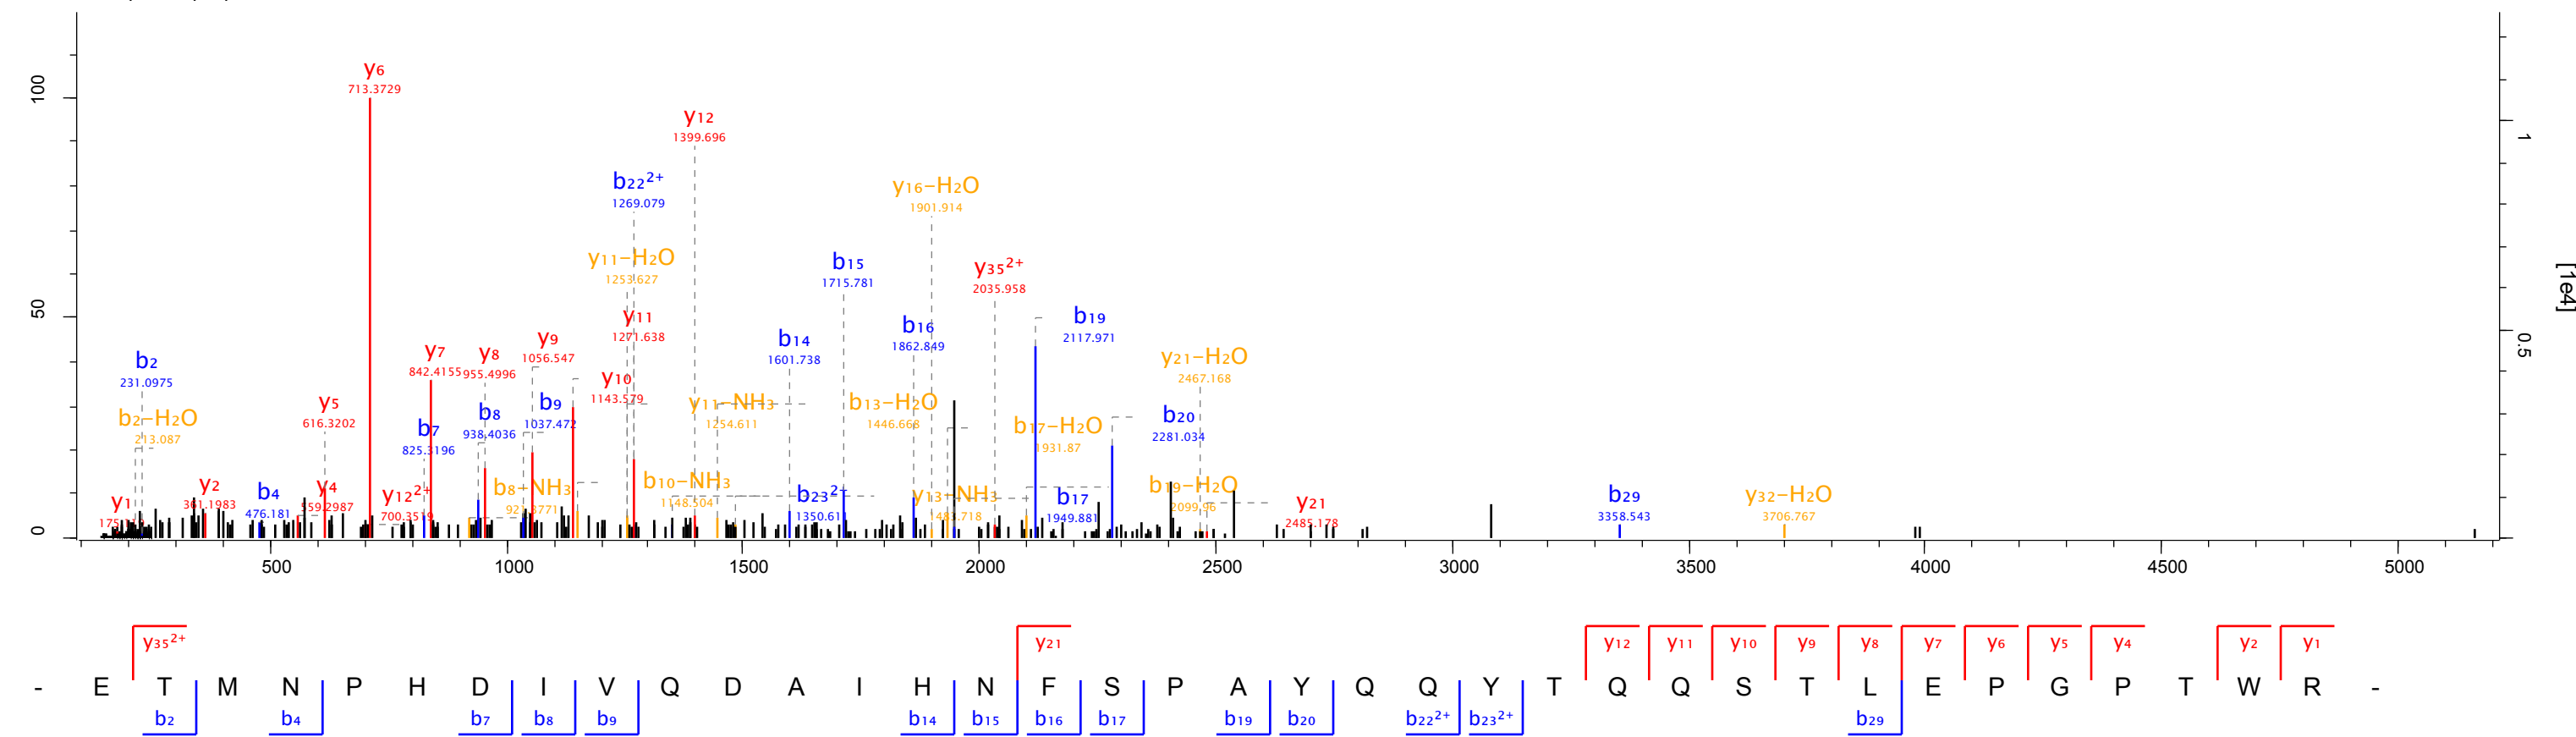

Raw file Scan Method Score m/z Gene names  
 20150307\_Hepa2\_Top\_opt\_D2\_01\_1686 72844 TOF; CID 51.5 913.5 Lacc1

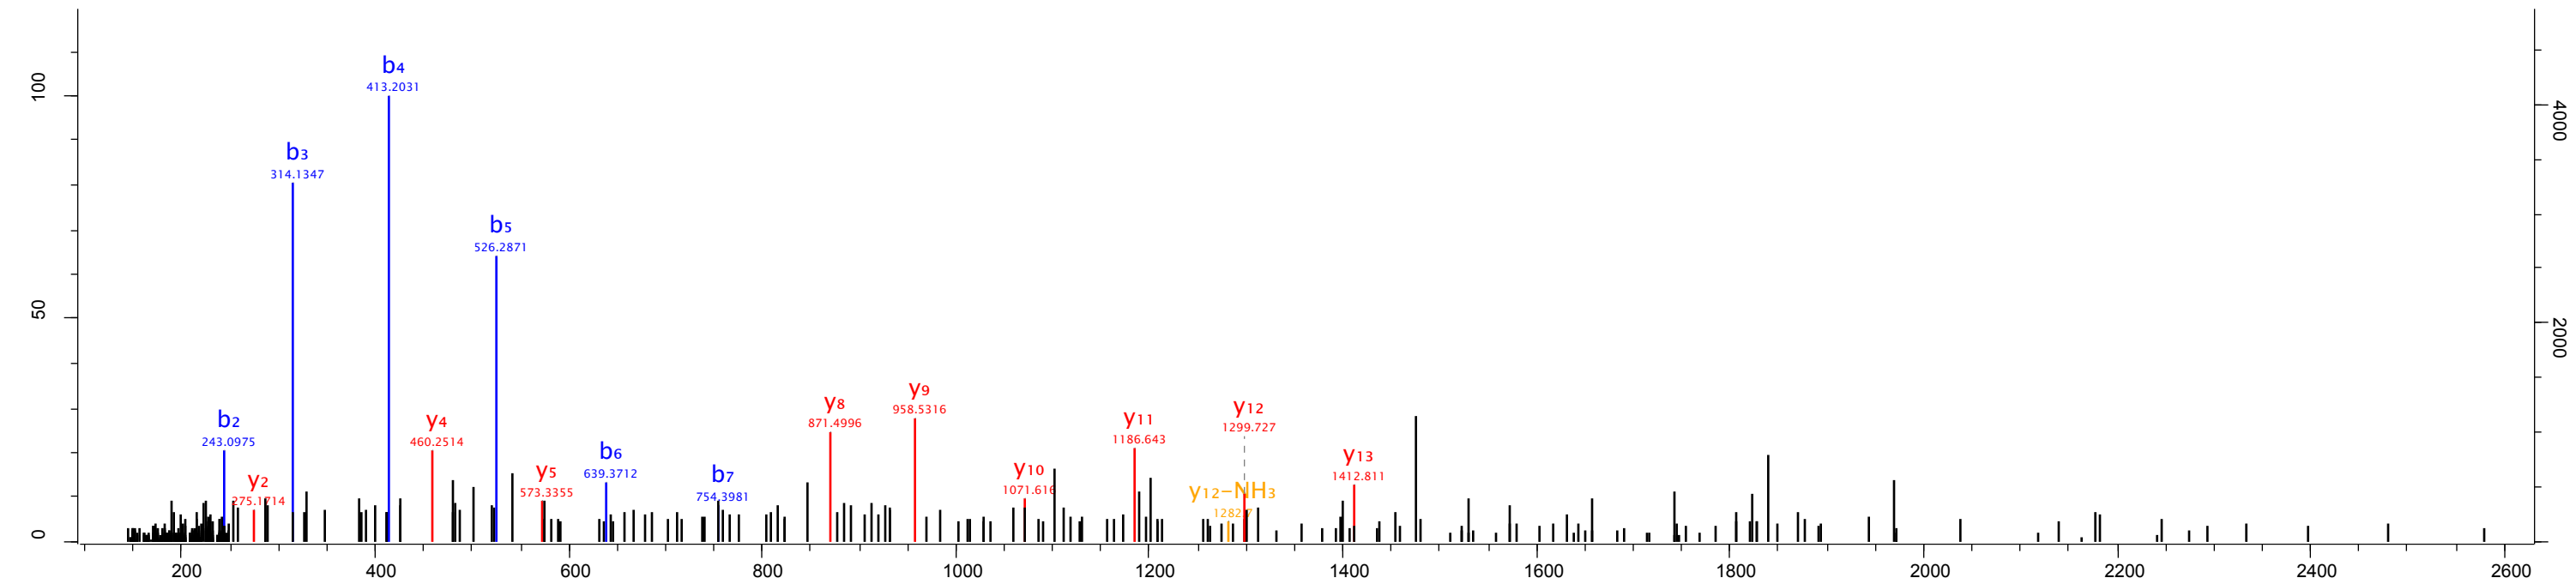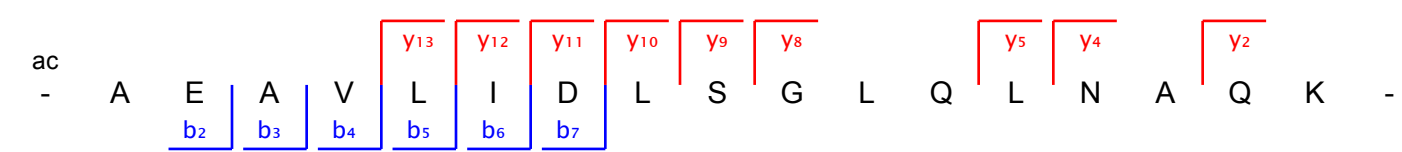

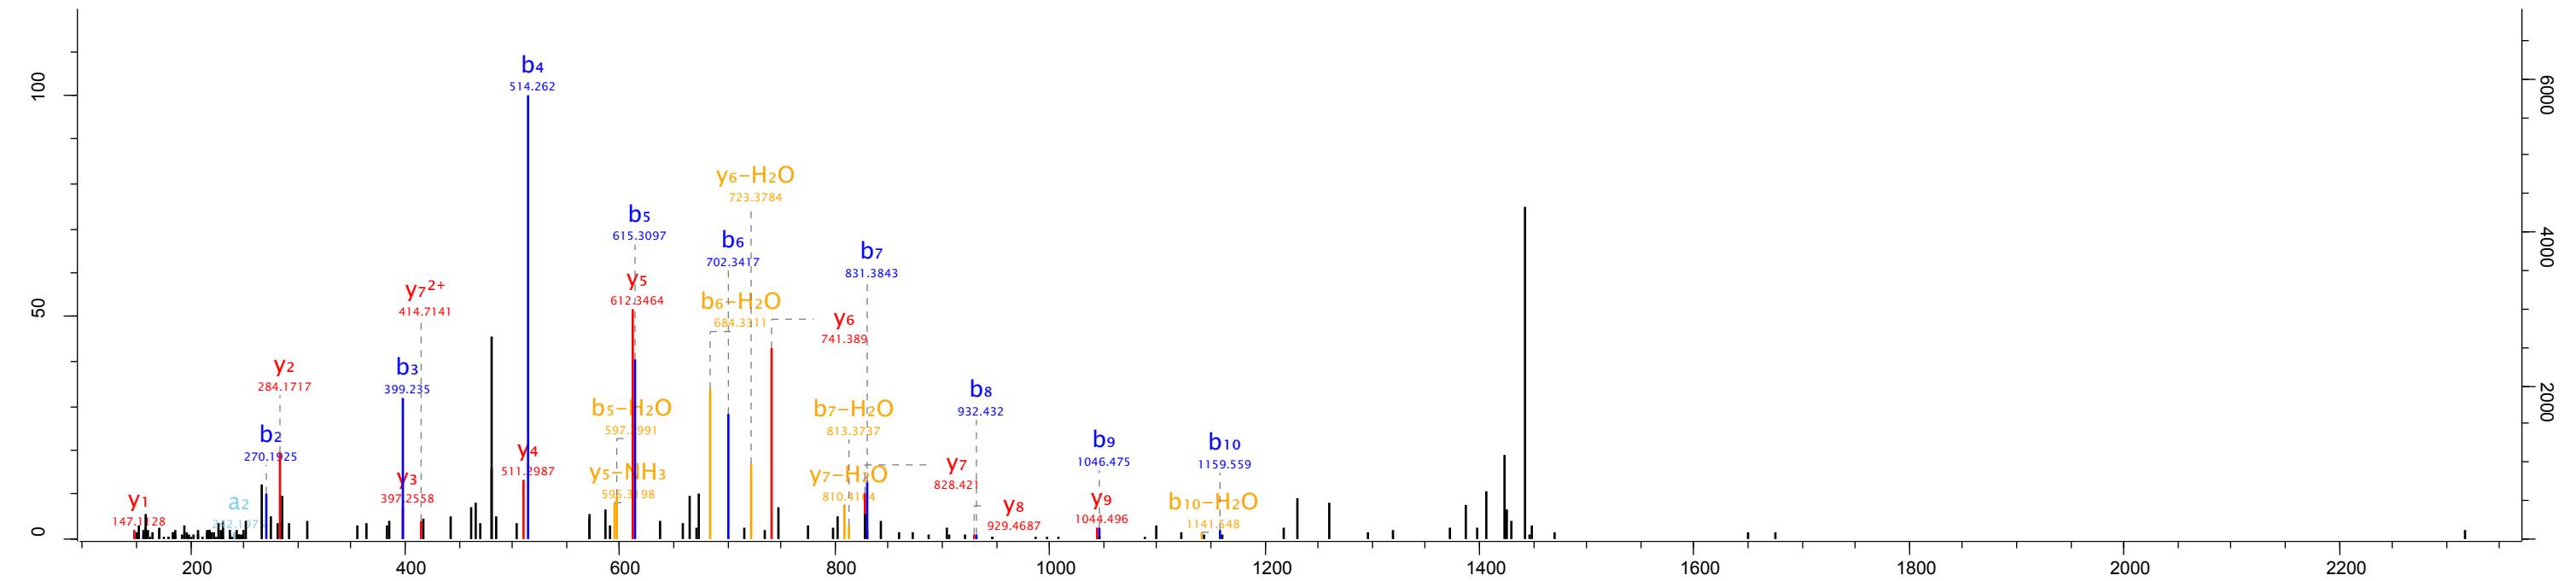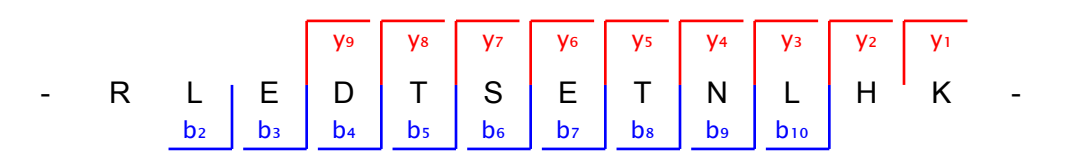



Raw file  
20150307\_Hepa3\_Top\_opt\_D3\_01\_1675

Scan 20342 Method TOF; CID Score 61.11 m/z 482.58 Gene names Foxred1

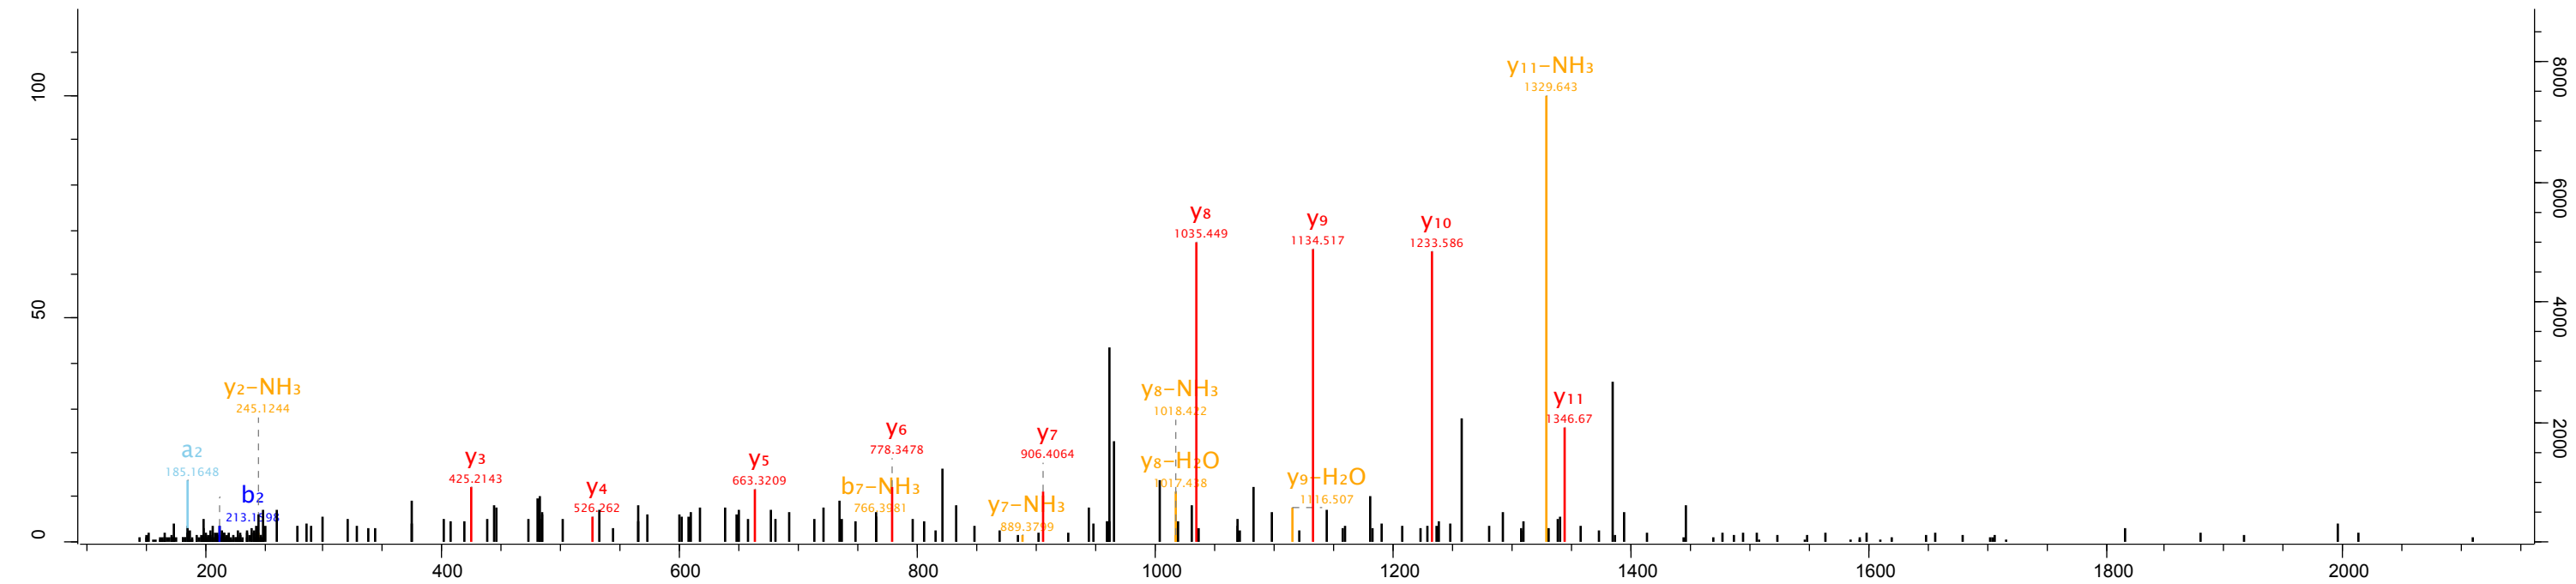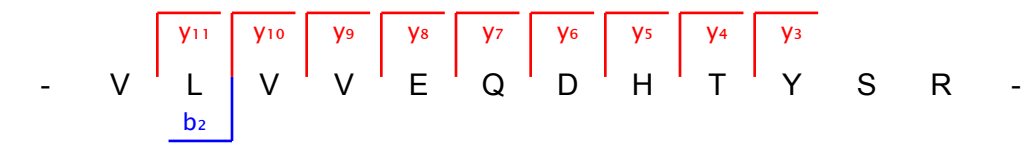

Raw file  
20150307\_Hepa3\_Top\_opt\_D3\_01\_1675

Scan 22570 Method TOF; CID Score 58.32 m/z 683.83 Gene names Esam

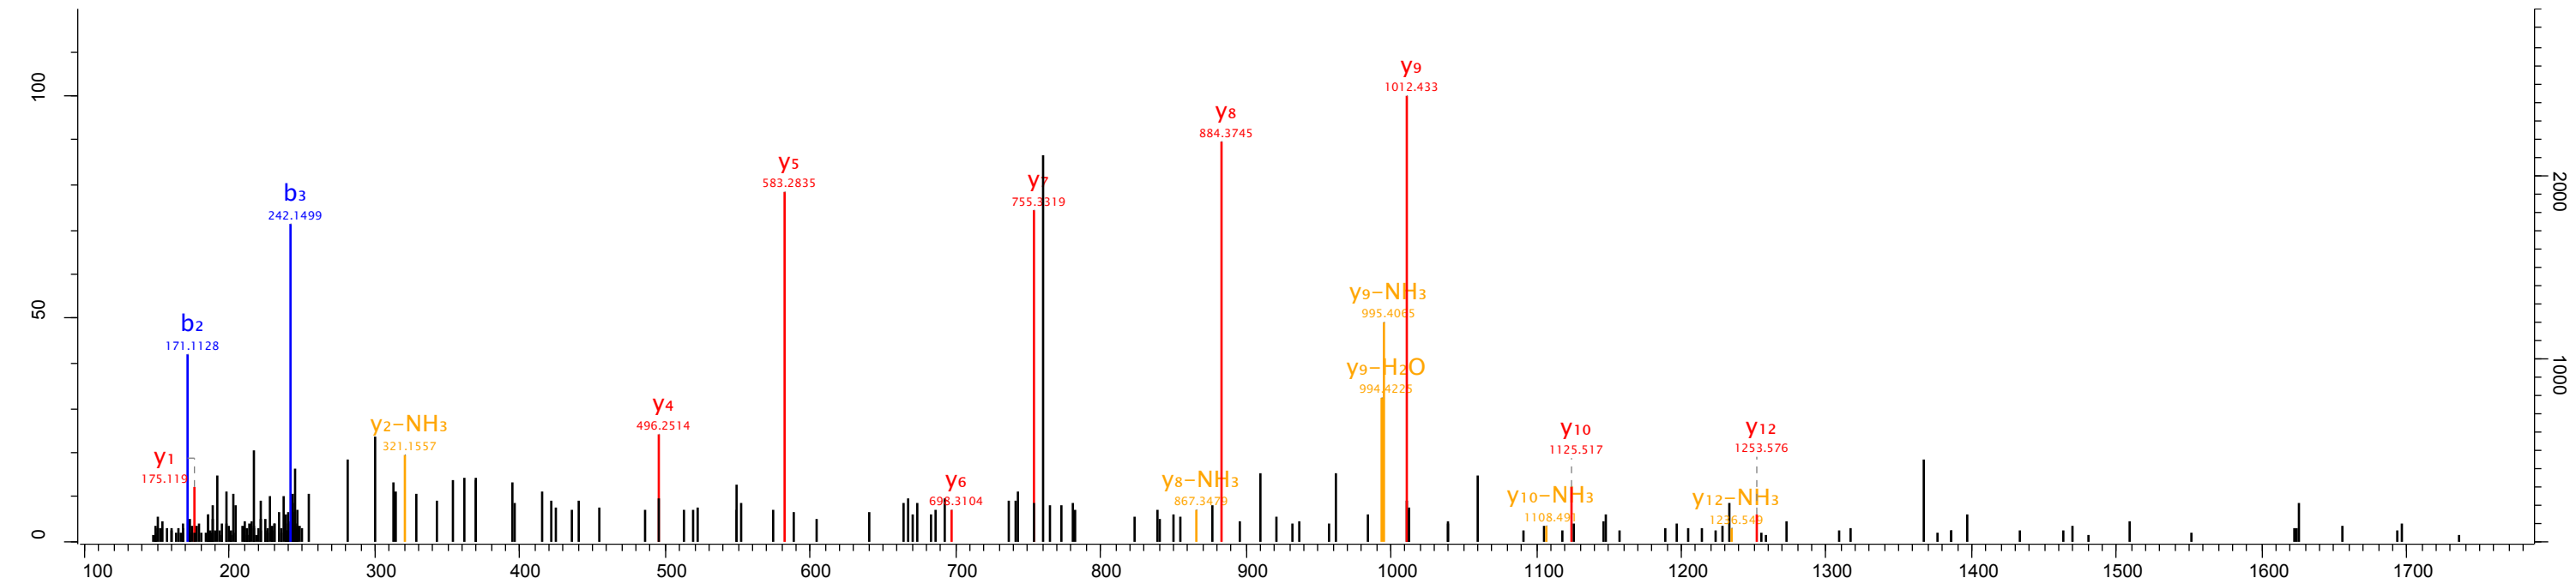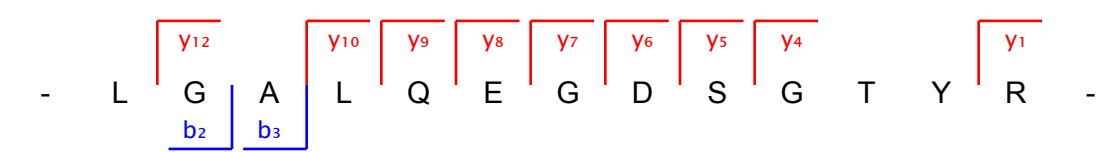

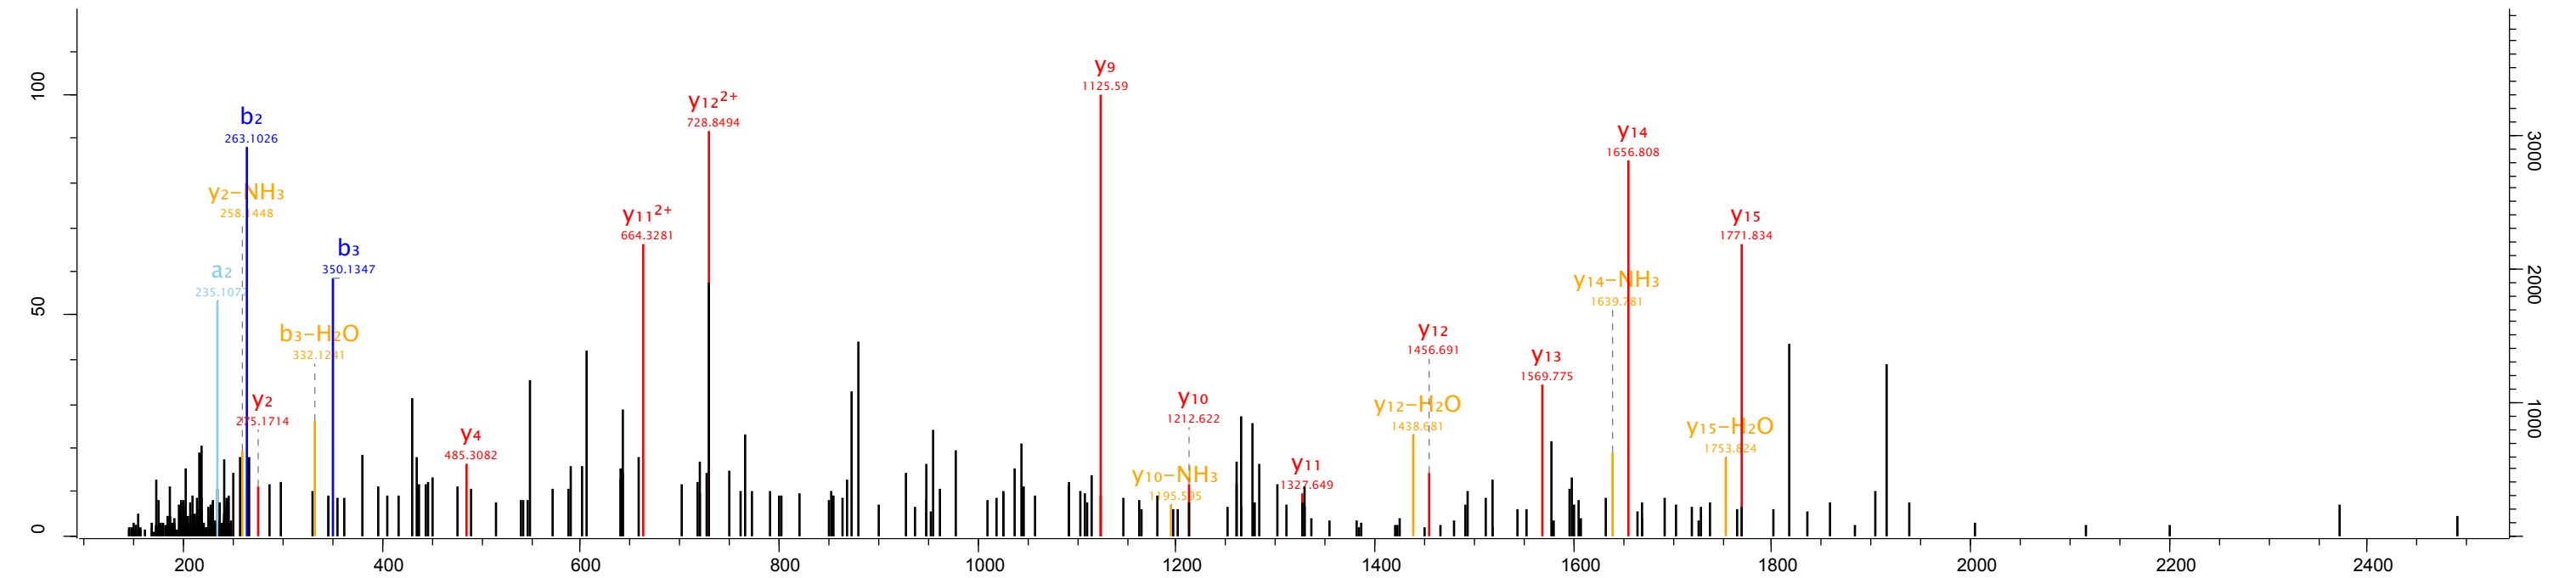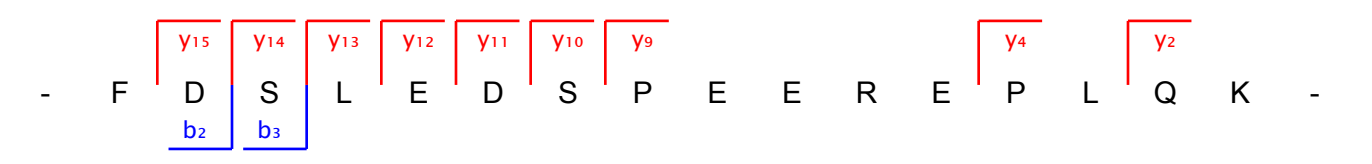

Raw file 20150307\_Hepa3\_Top\_opt\_D3\_01\_1675 Scan 37532 Method TOF; CID Score 46.84 m/z 678.3 Gene names Cd59a

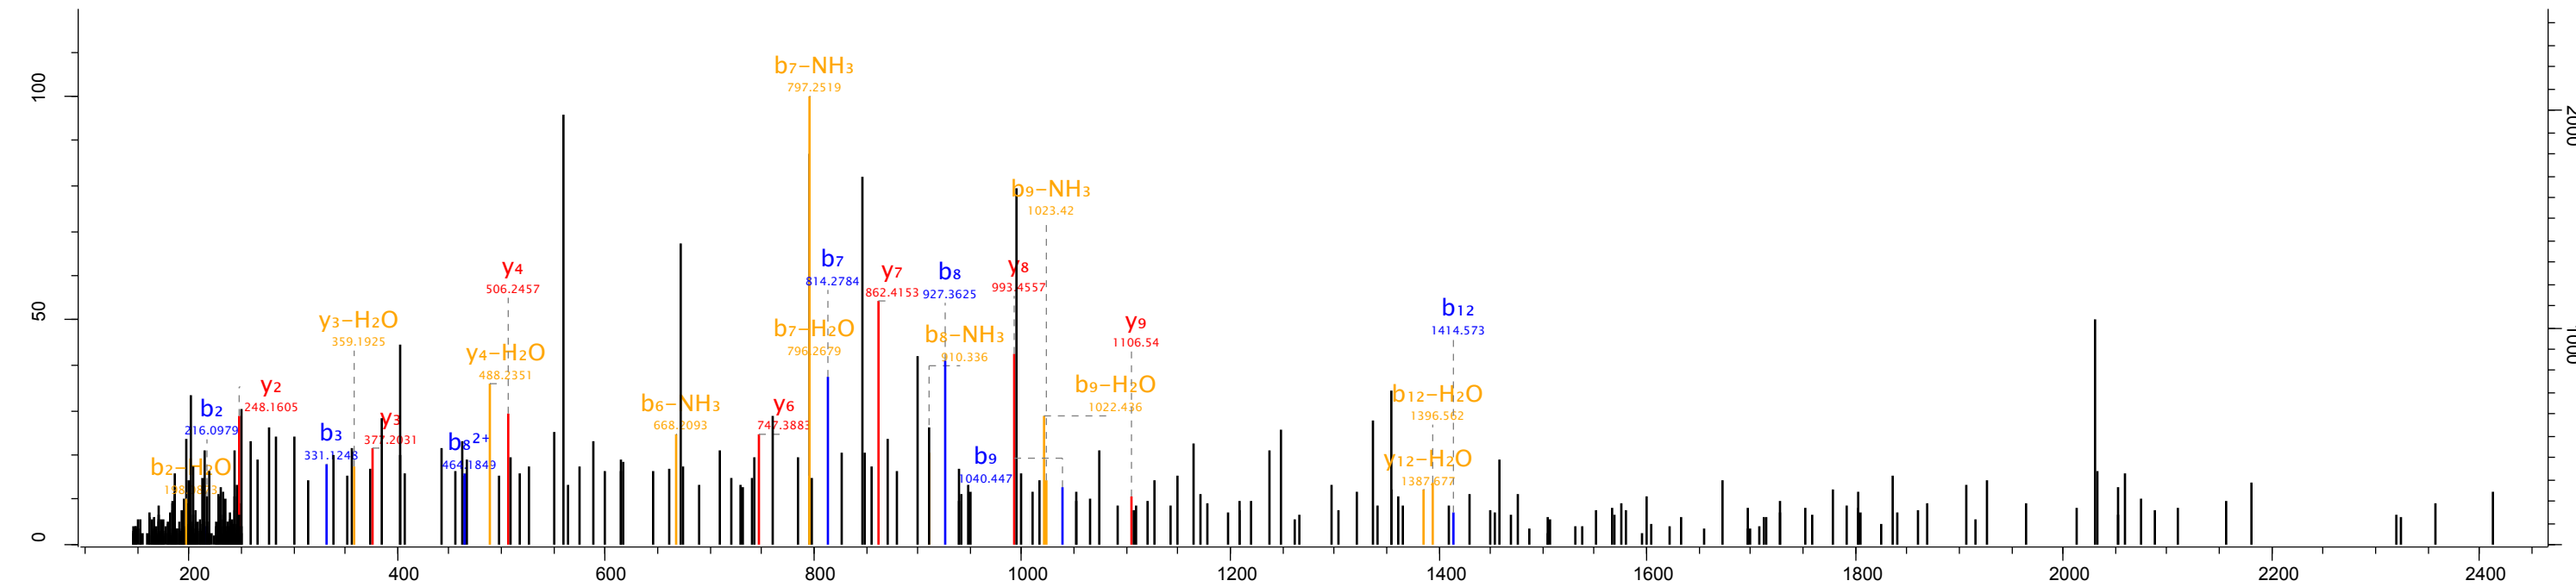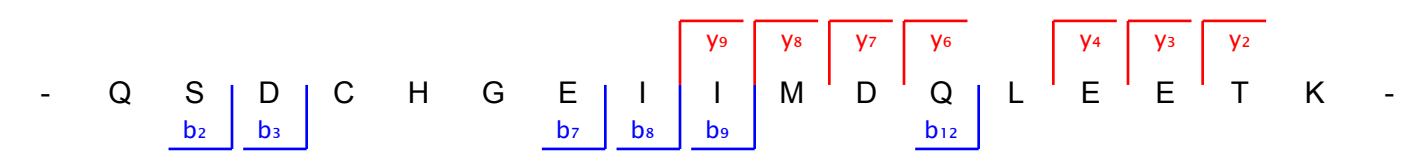

Raw file Scan Method Score m/z Gene names  
 20150307\_Hepa3\_Top\_opt\_D3\_01\_1675 42656 TOF; CID 47.09 734.65 Elof1

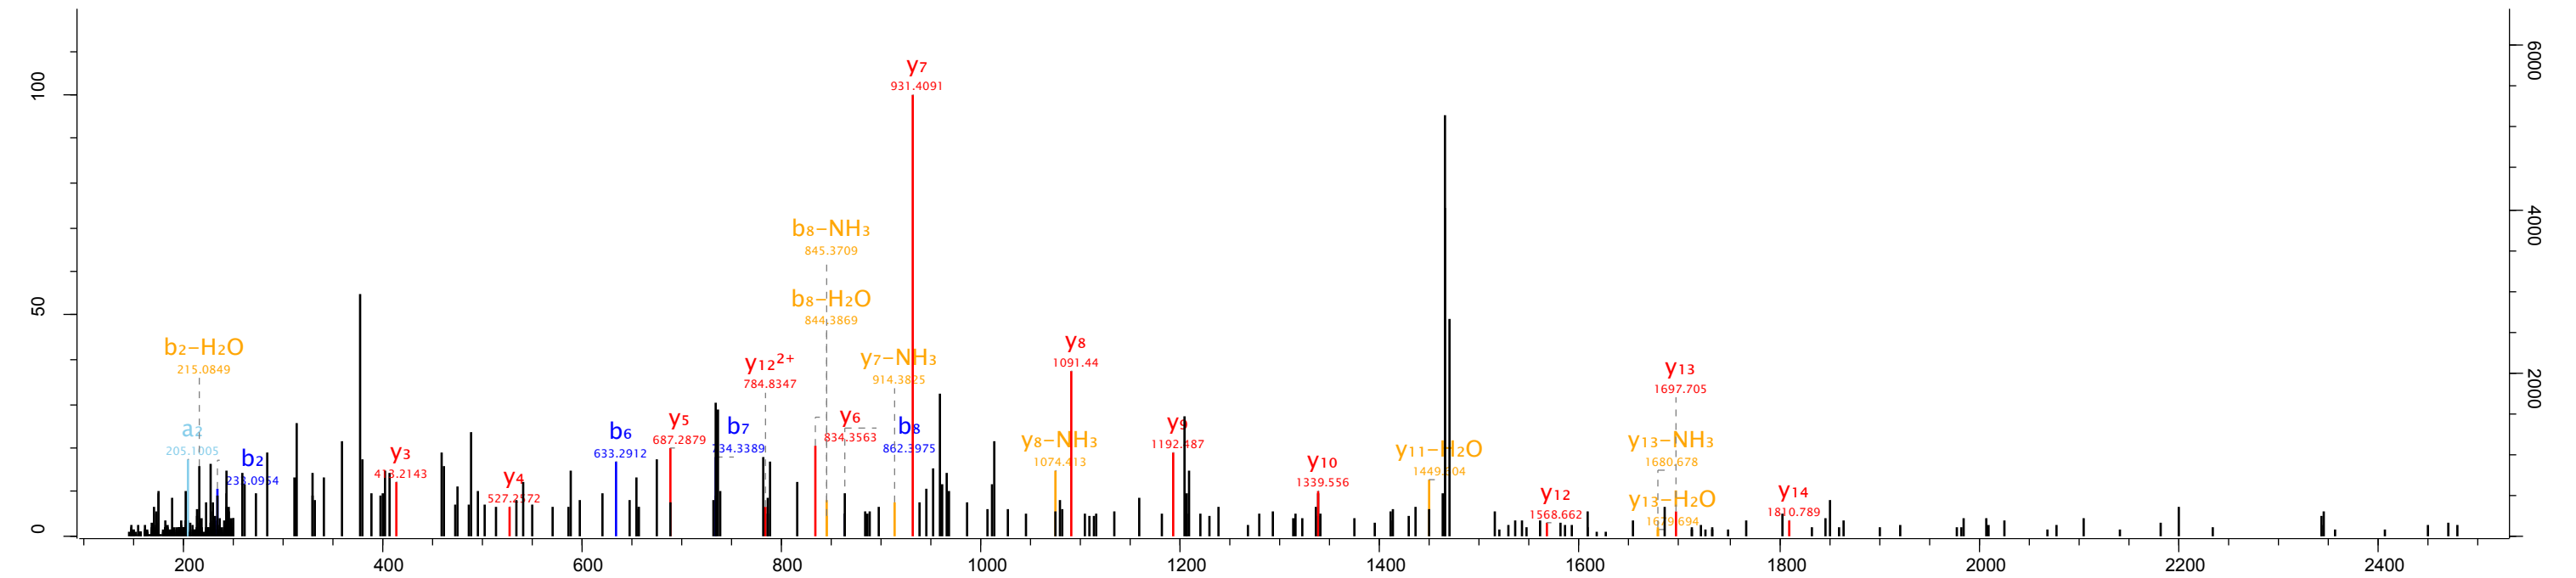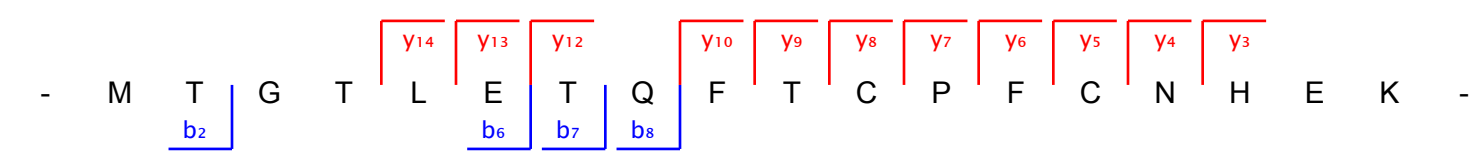

Raw file  
20150307\_Hepa3\_Top\_opt\_D3\_01\_1675

Scan 46744 Method TOF; CID Score 71.56 m/z 730.41 Gene names Zcchc10

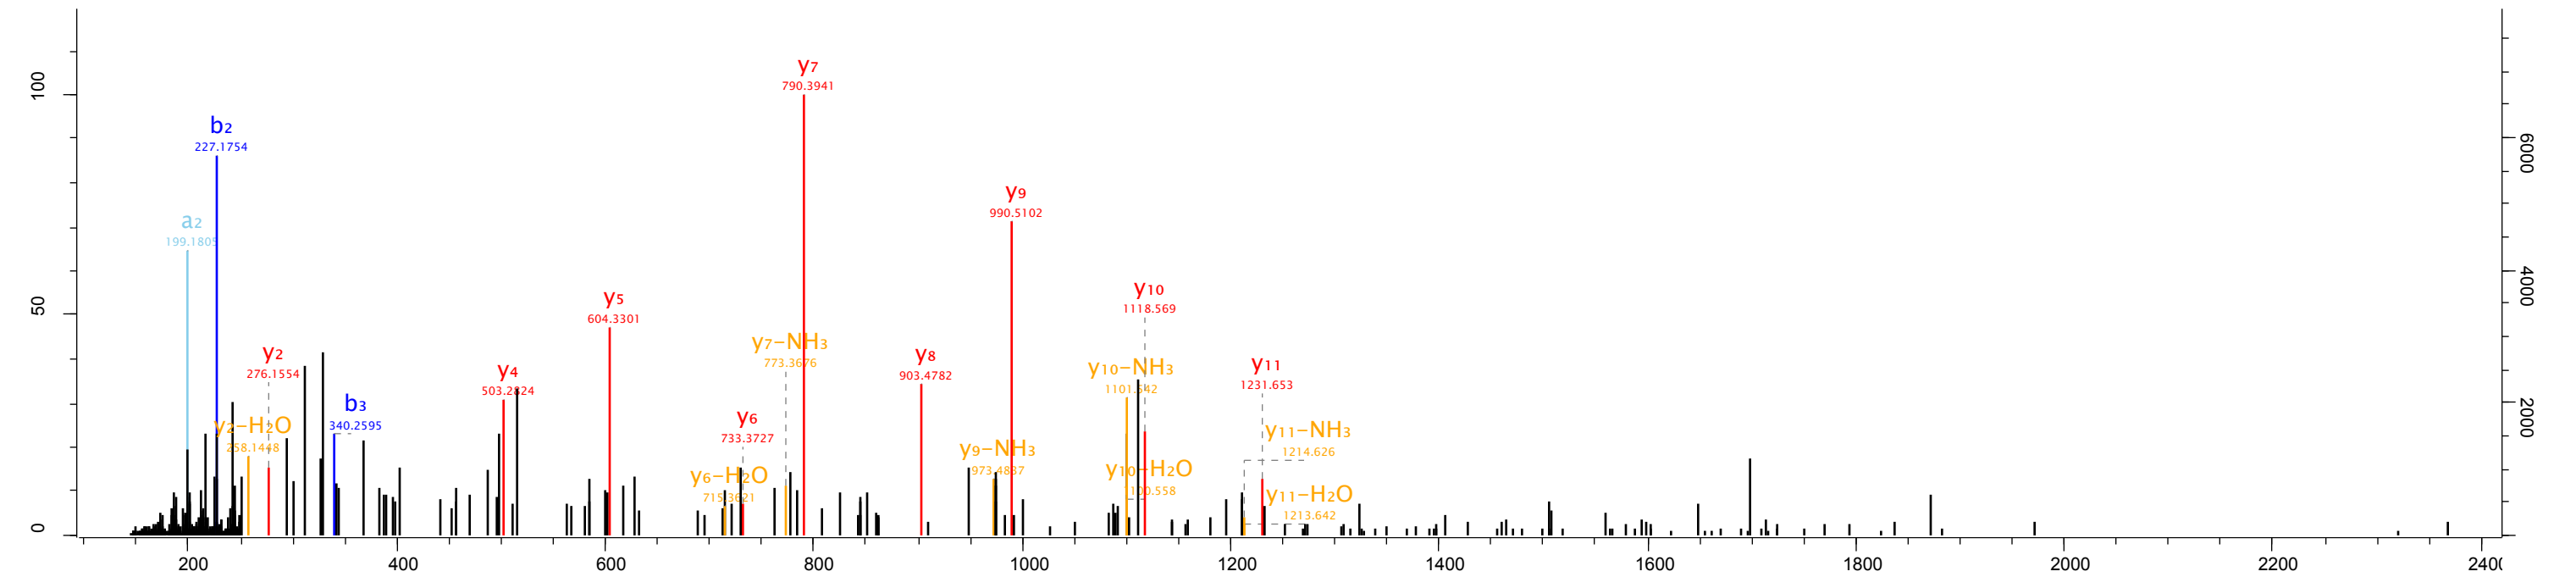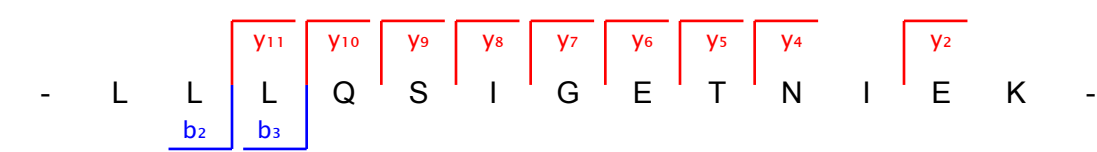

Raw file: 20150307\_Hepa3\_Top\_opt\_D3\_01\_1675  
 Scan: 49767 Method: TOF; CID Score: 62.2 m/z: 624.01 Gene names: Echdc3

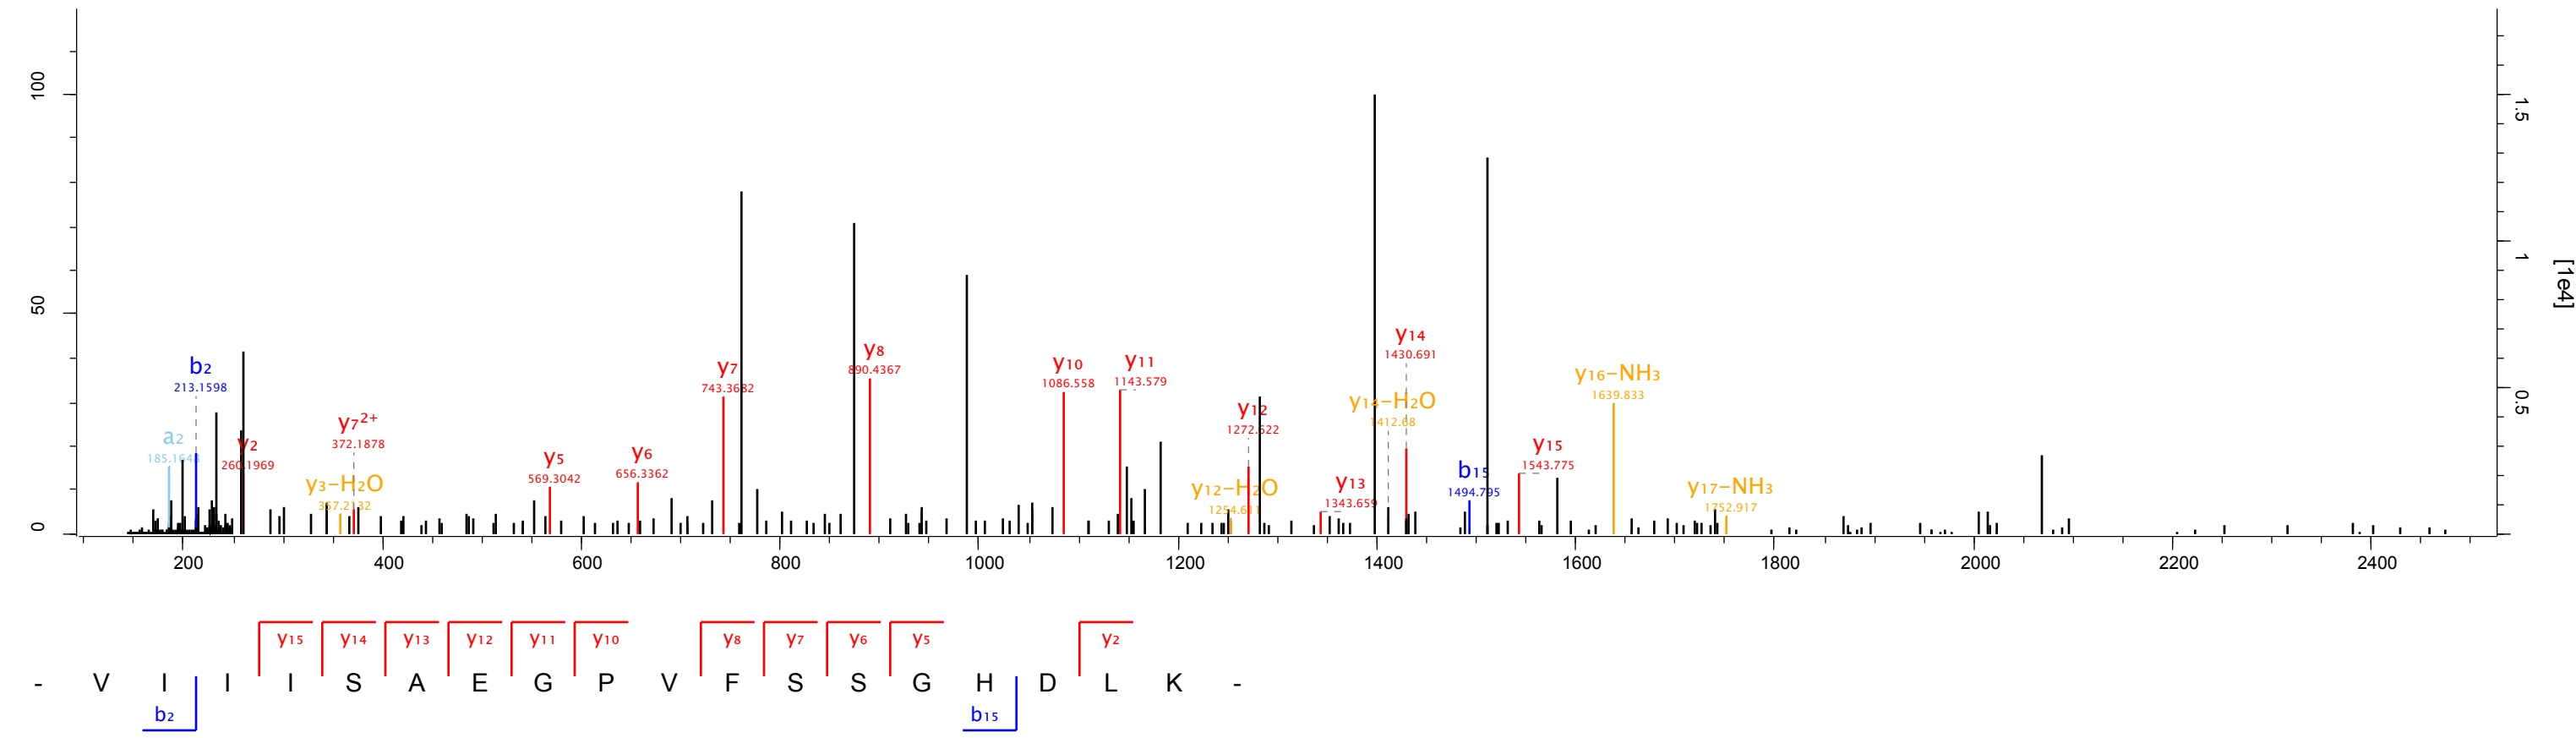

Raw file 20150307\_Hepa3\_Top\_opt\_D3\_01\_1675 Scan 49832 Method TOF; CID Score 80.51 m/z 578.68 Gene names Tmem11

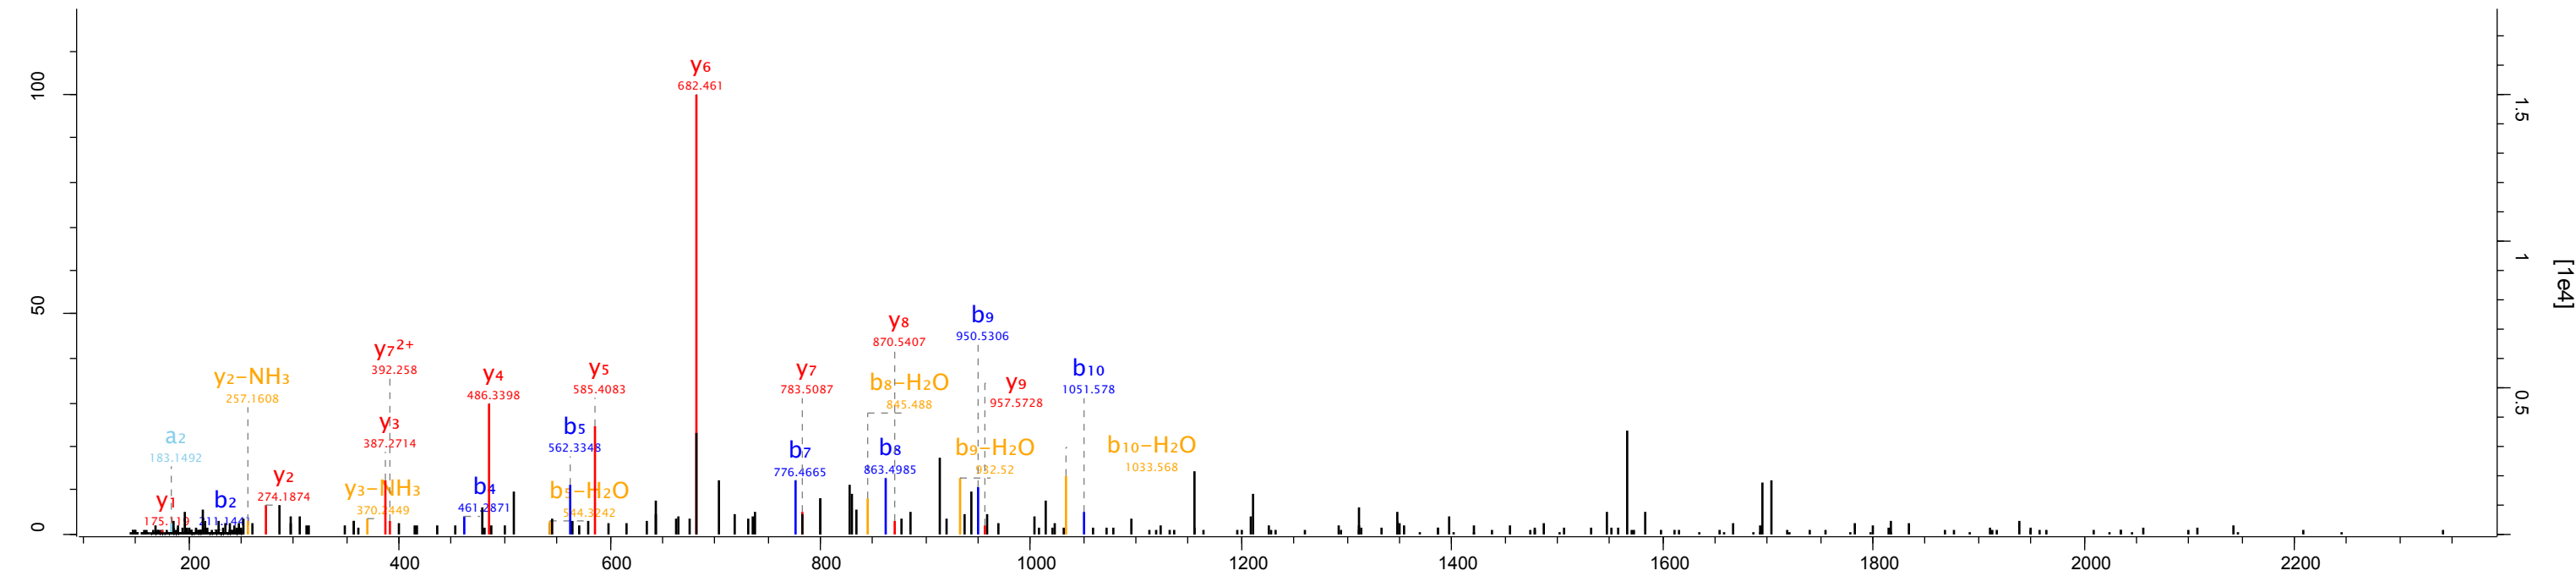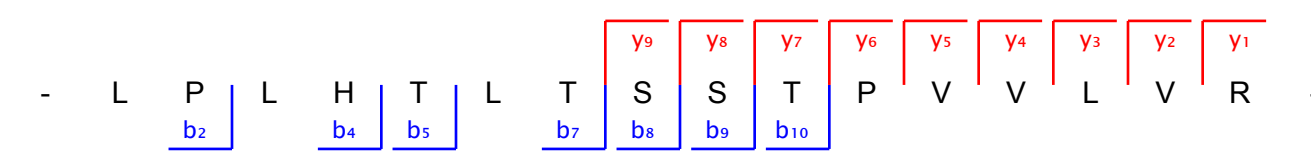



Raw file 20150307\_Hepa3\_Top\_opt\_D3\_01\_1675 Scan 51464 Method TOF; CID Score 49.66 m/z 1059.51 Gene names Gm20604

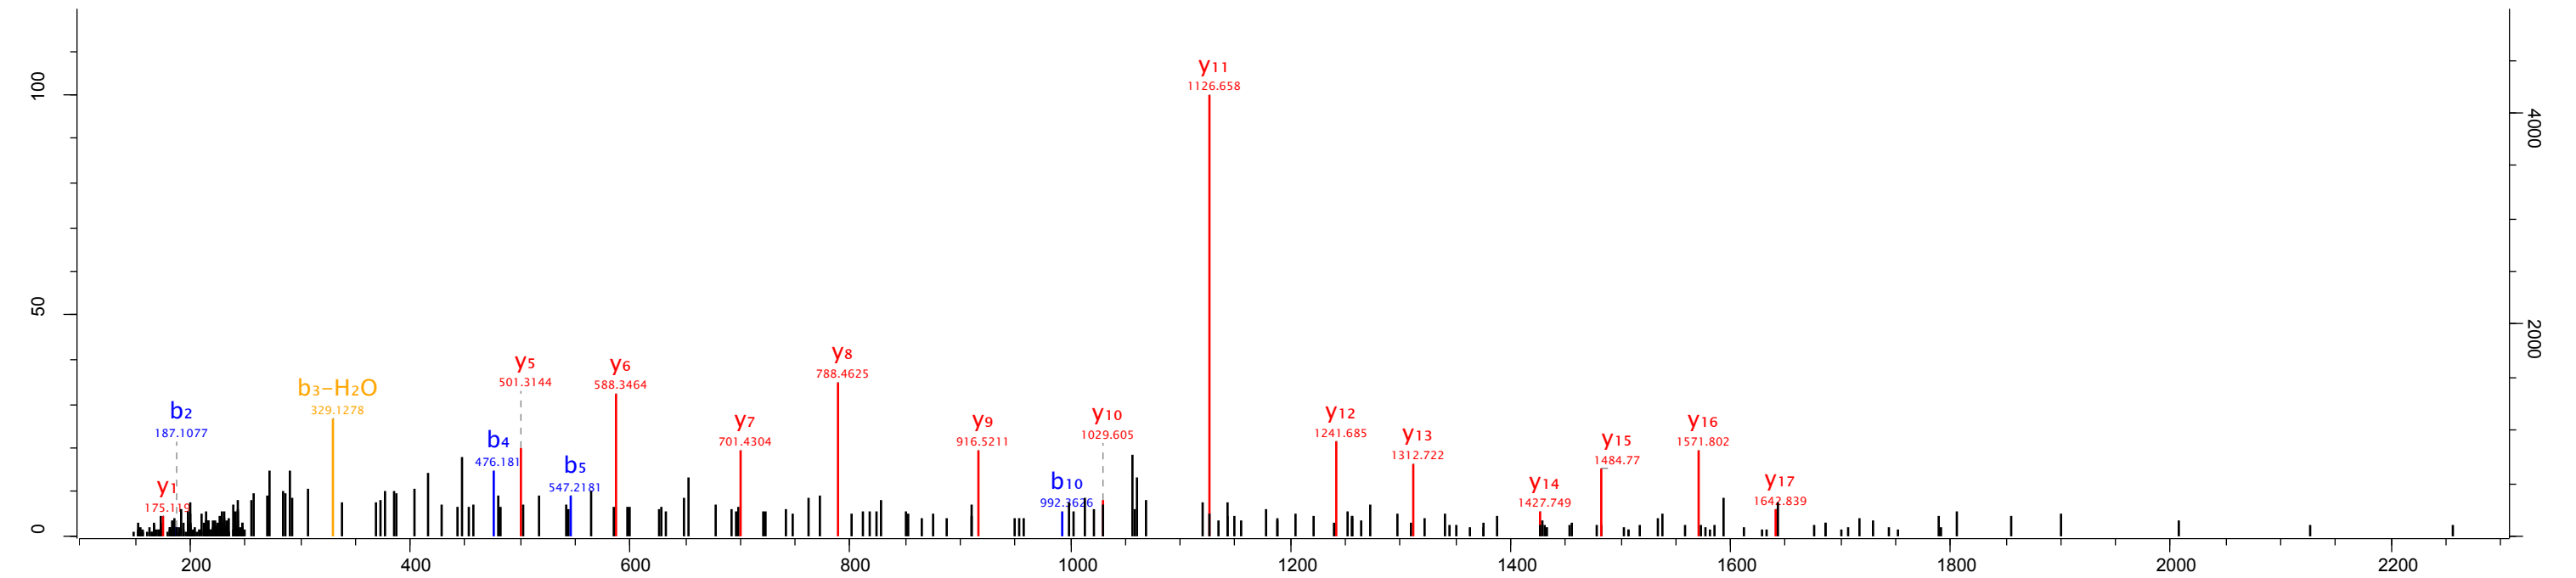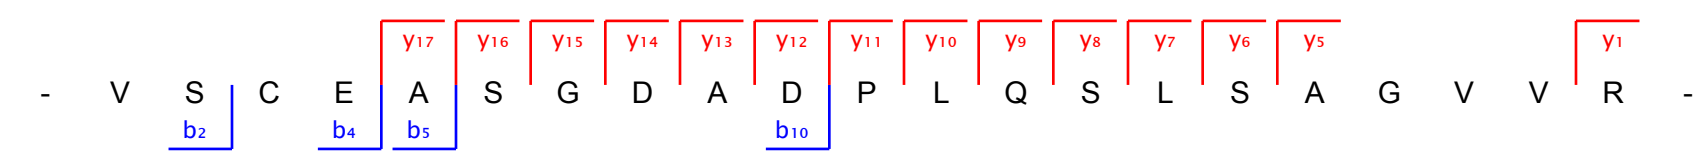

Raw file 20150307\_Hepa3\_Top\_opt\_D3\_01\_1675 Scan 54737 Method TOF; CID Score 78.95 m/z 675.32 Gene names FosI1

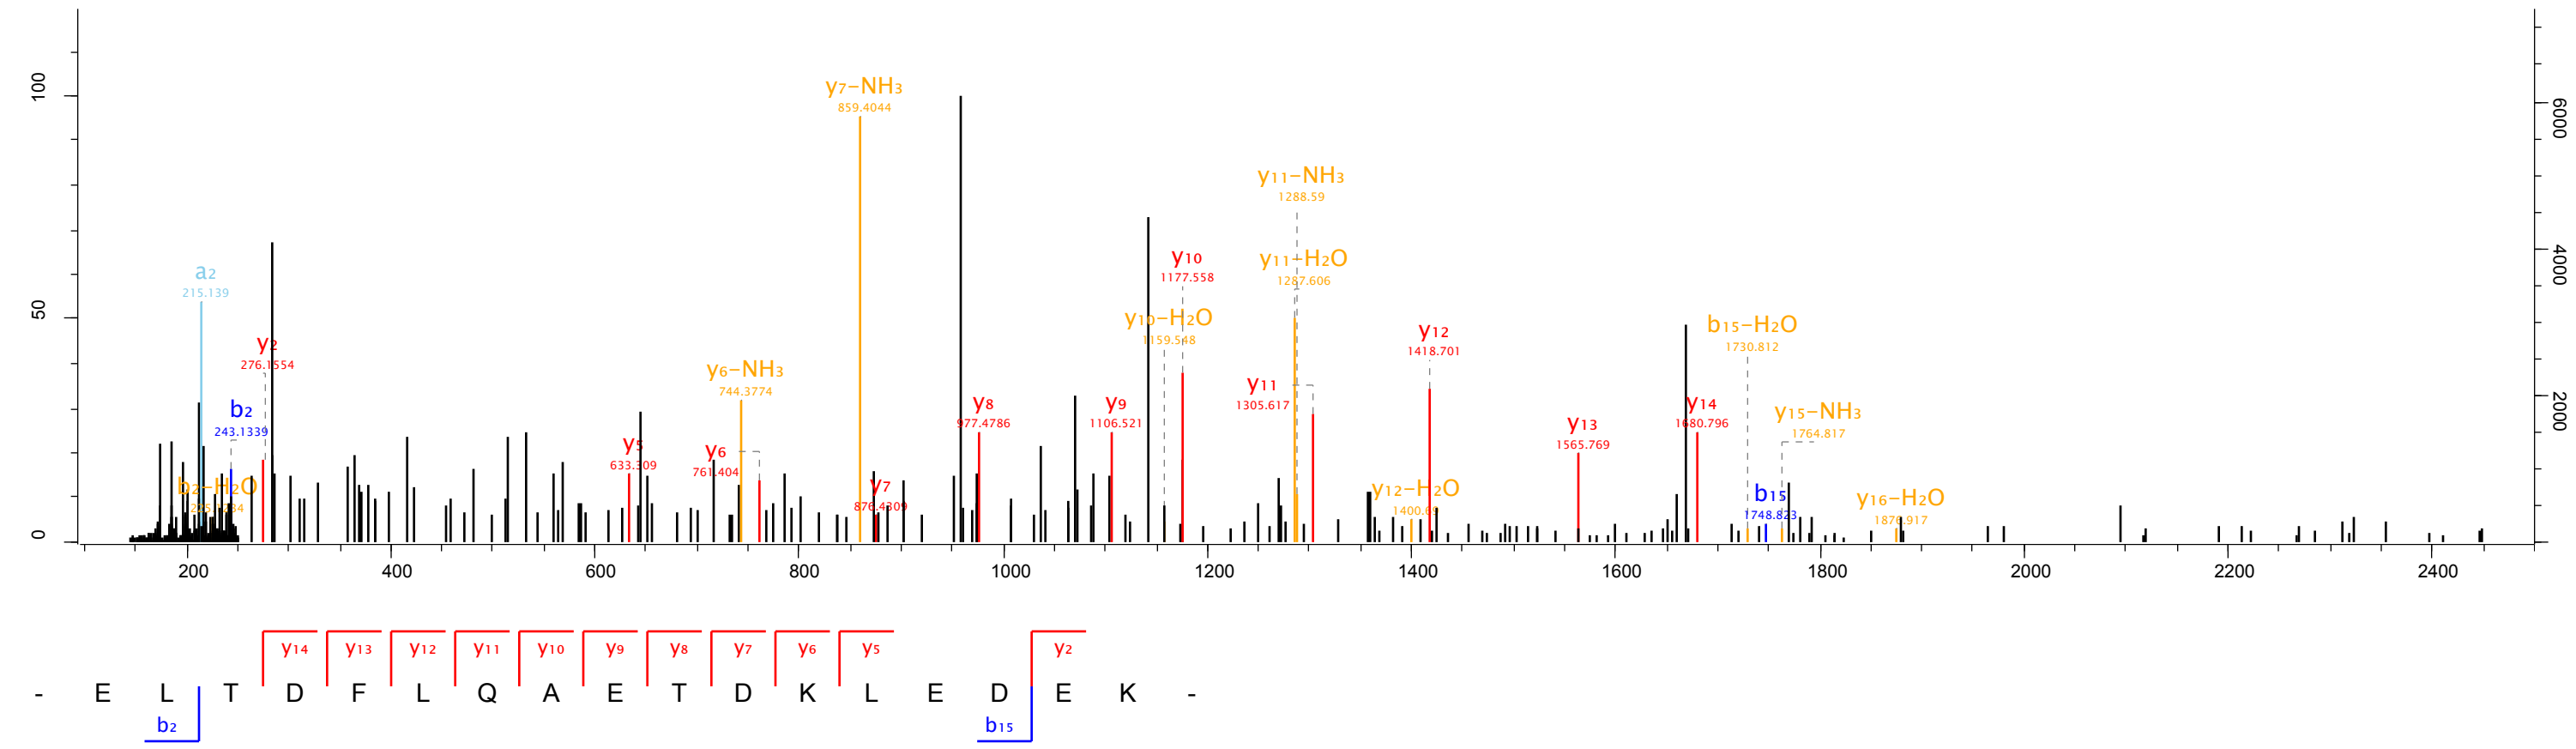

Raw file: 20150307\_Hepa3\_Top\_opt\_D3\_01\_1675  
 Scan: 56508 Method: TOF; CID Score: 57.29 m/z: 813.45 Gene names: Plac8

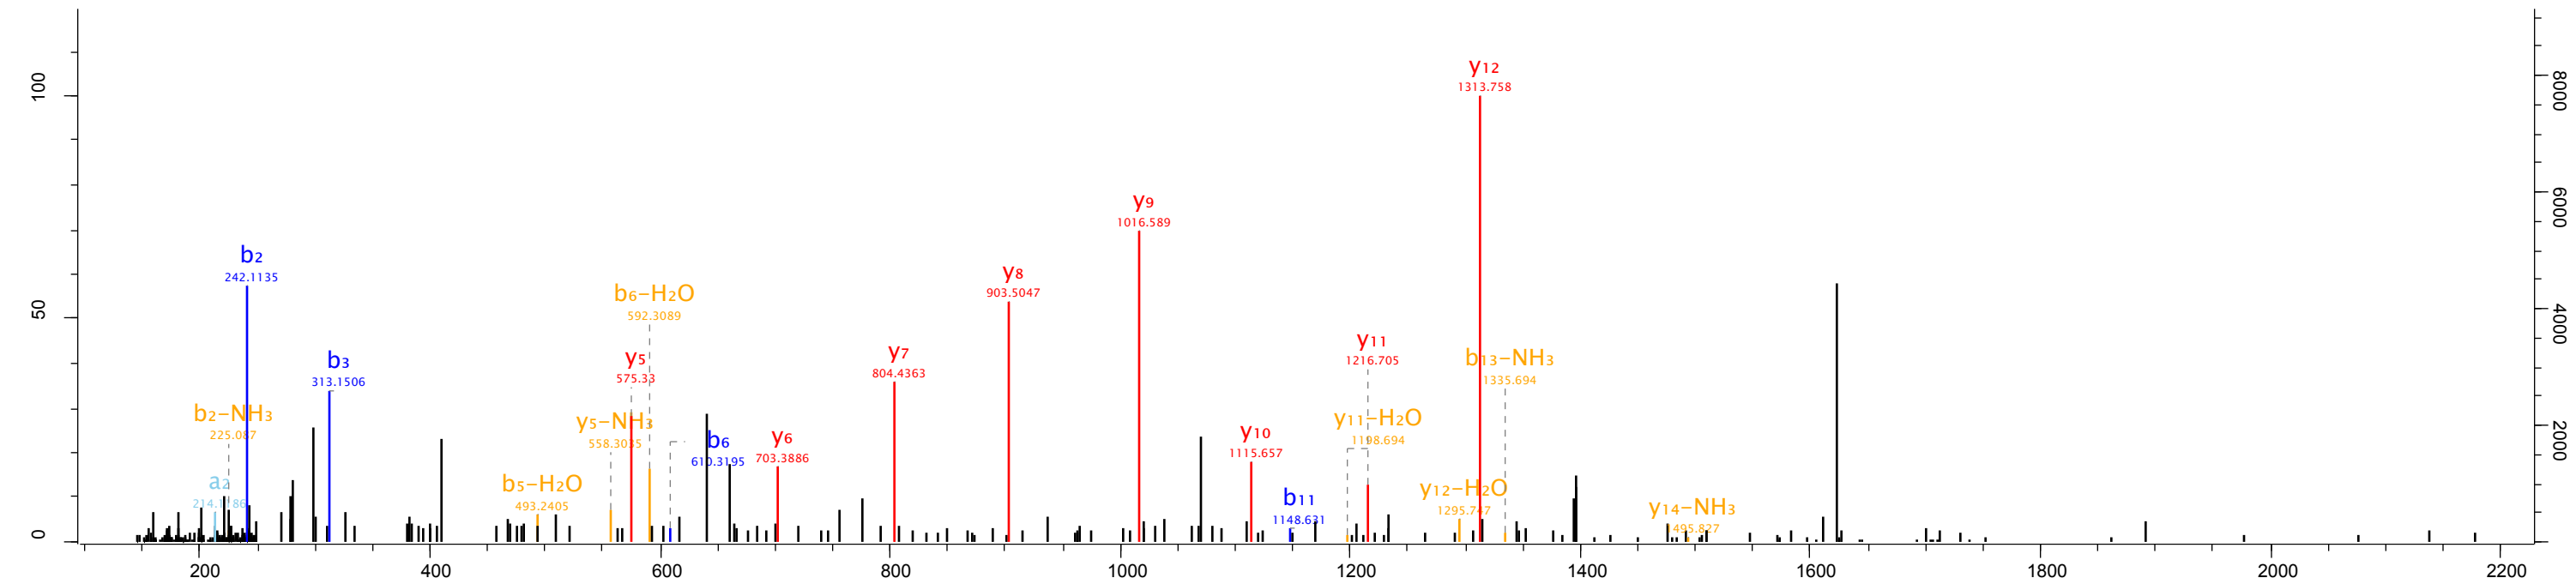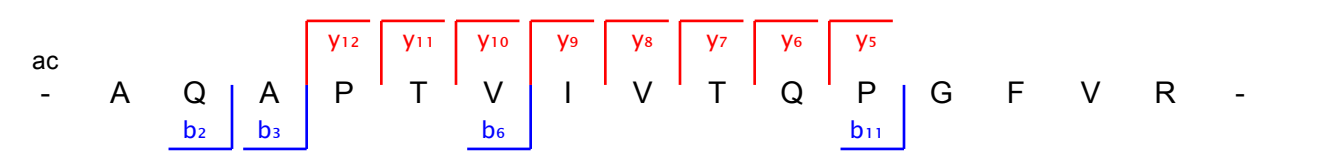

Raw file 20150307\_Hepa3\_Top\_opt\_D3\_01\_1675 Scan 58653 Method TOF; CID Score 45.35 m/z 1038.5 Gene names Tnfrsf12a

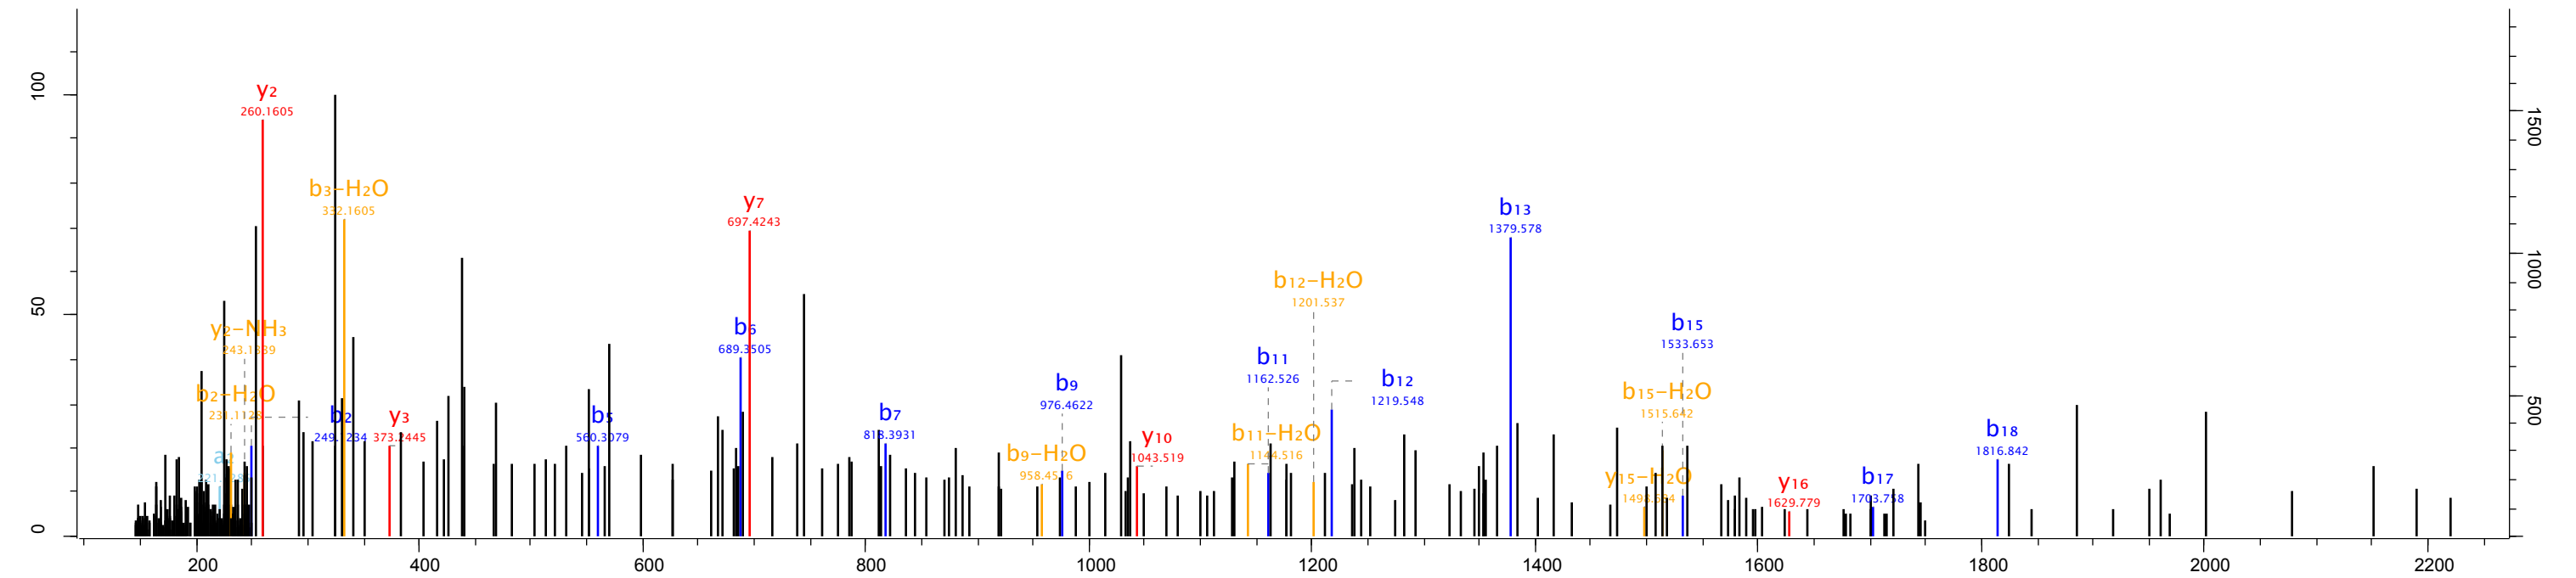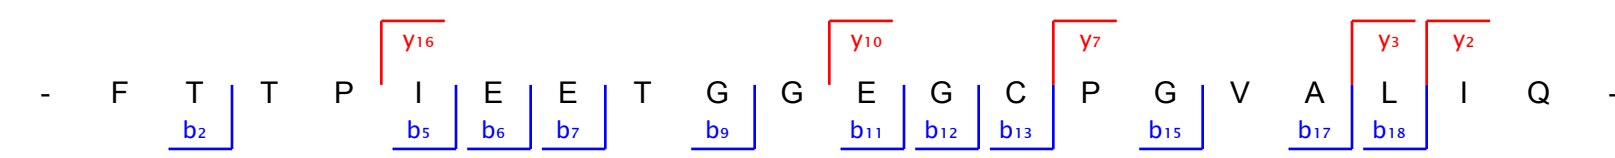

Raw file 20150307\_Hepa3\_Top\_opt\_D3\_01\_1675 Scan 69382 Method TOF; CID Score 184.48 m/z 597.37 Gene names Kdelr2

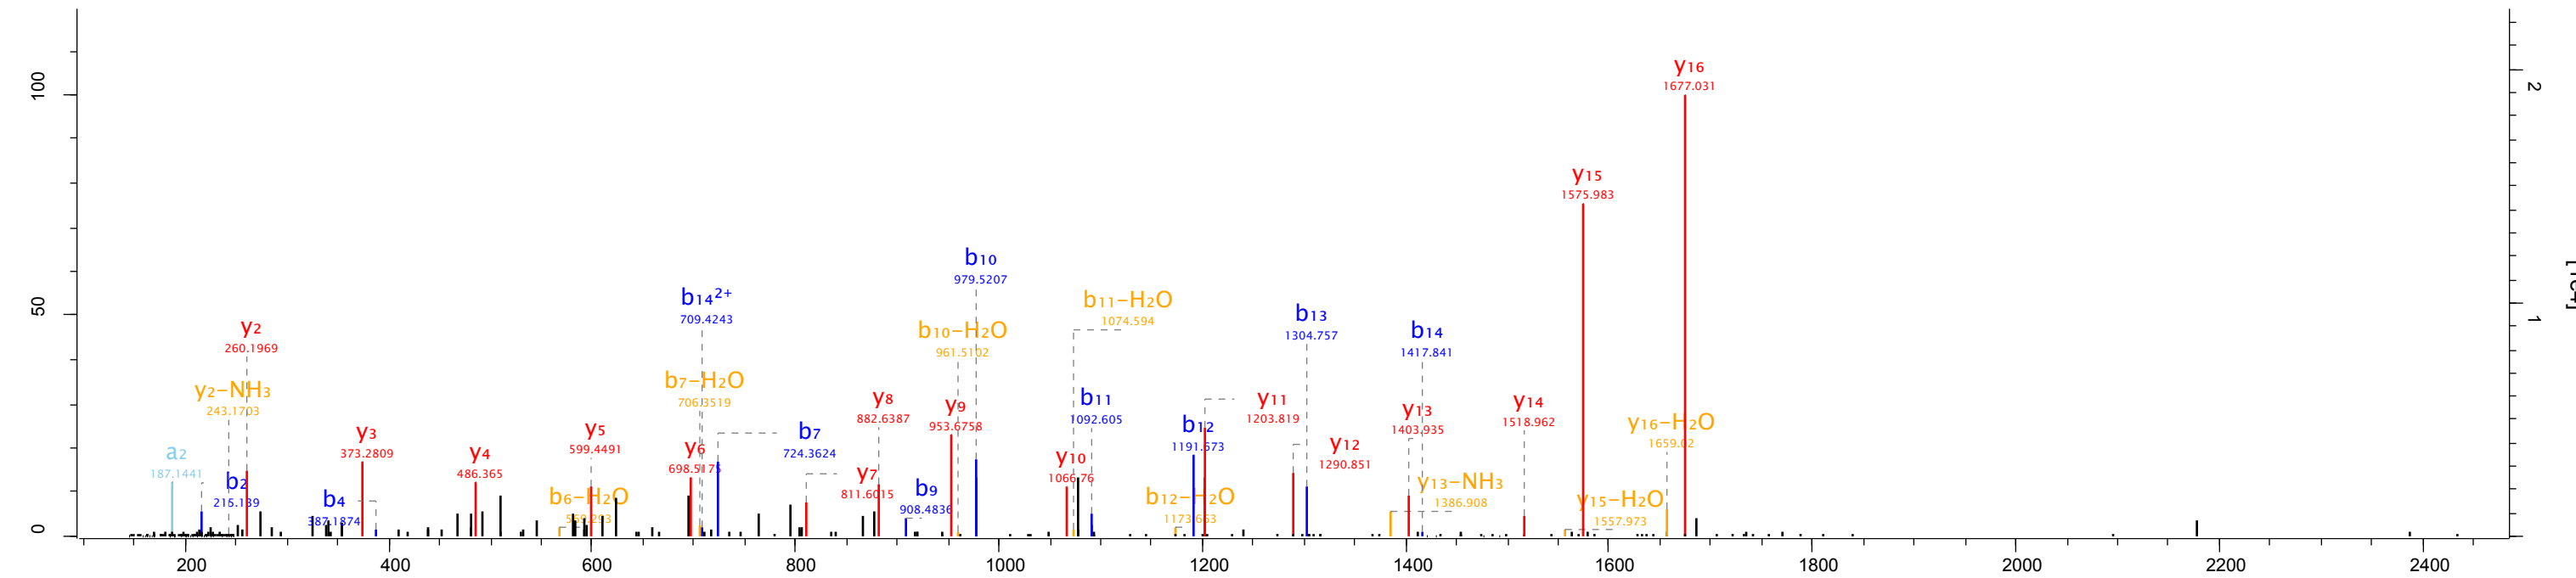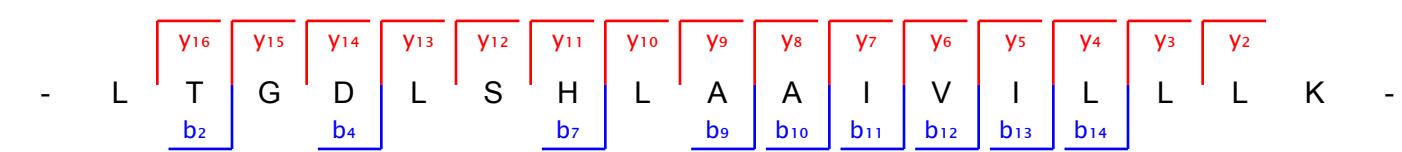

Raw file  
20150307\_Hepa3\_Top\_opt\_D3\_01\_1675

Scan 69431 Method TOF; CID Score 90.3 m/z 1132.59 Gene names Ssr2

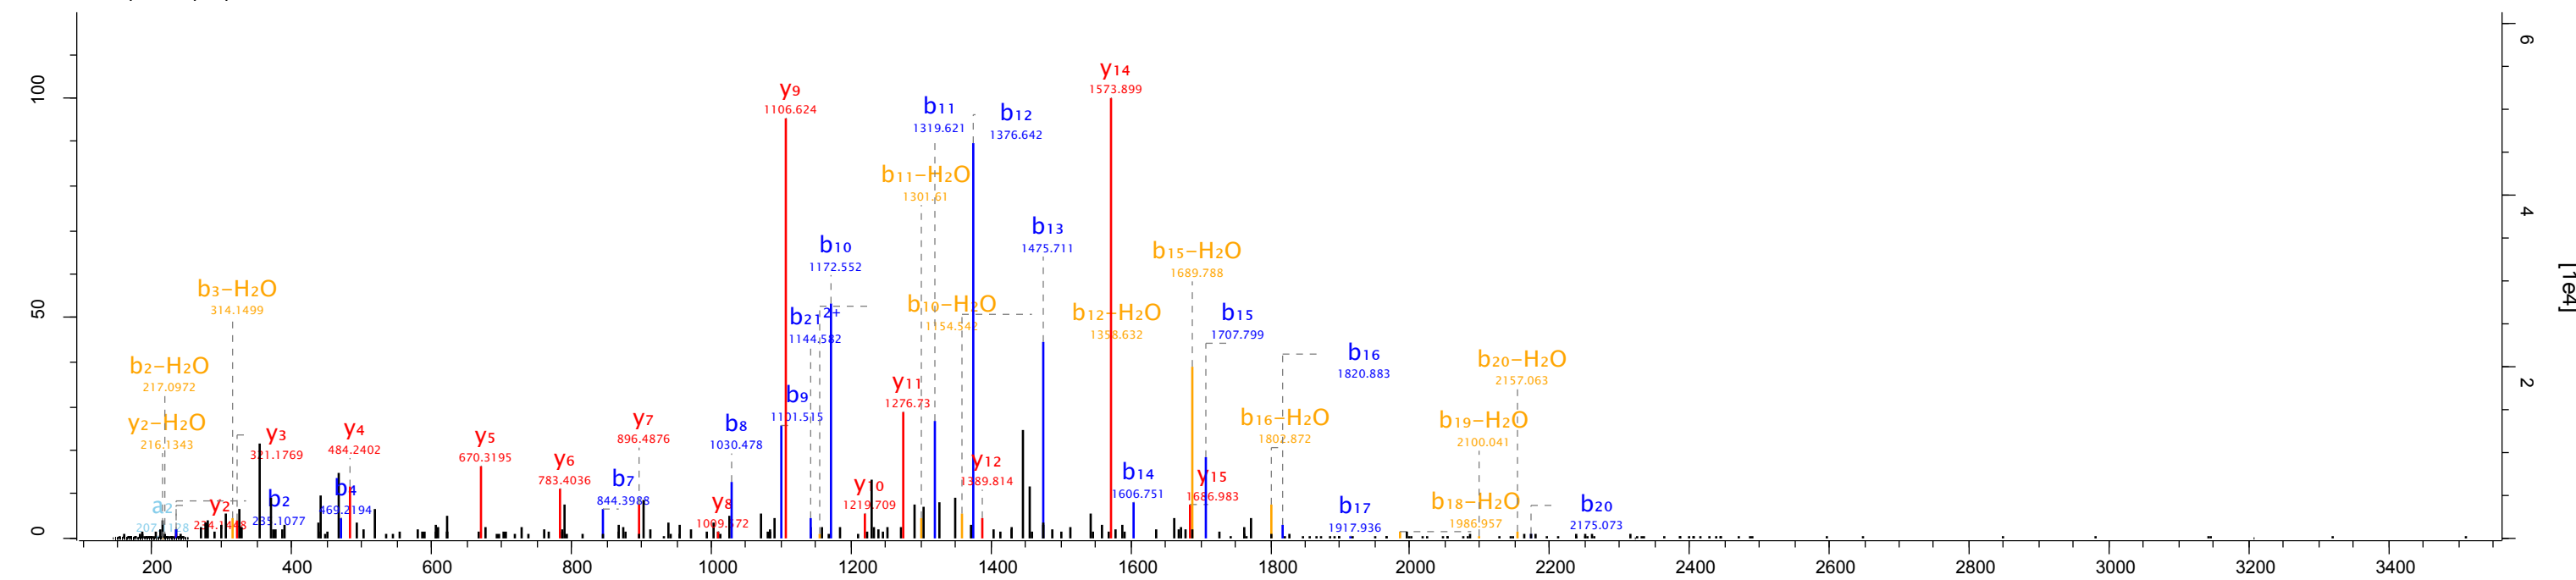

- F S P H F L D W A A F G V M T L P S I G I P L L L W Y S S K -

b<sub>2</sub> b<sub>4</sub> b<sub>7</sub> b<sub>8</sub> b<sub>9</sub> b<sub>10</sub> b<sub>11</sub> b<sub>12</sub> b<sub>13</sub> b<sub>14</sub> b<sub>15</sub> b<sub>16</sub> b<sub>17</sub> b<sub>20</sub> b<sub>21</sub><sup>2+</sup> y<sub>2</sub> y<sub>3</sub> y<sub>4</sub> y<sub>5</sub> y<sub>6</sub> y<sub>7</sub> y<sub>8</sub> y<sub>9</sub> y<sub>10</sub> y<sub>11</sub> y<sub>12</sub> y<sub>14</sub> y<sub>15</sub>

Raw file 20150307\_Hepa3\_Top\_opt\_D3\_01\_1675 Scan 69437 Method TOF; CID Score 94.18 m/z 1294.63 Gene names Cox8a

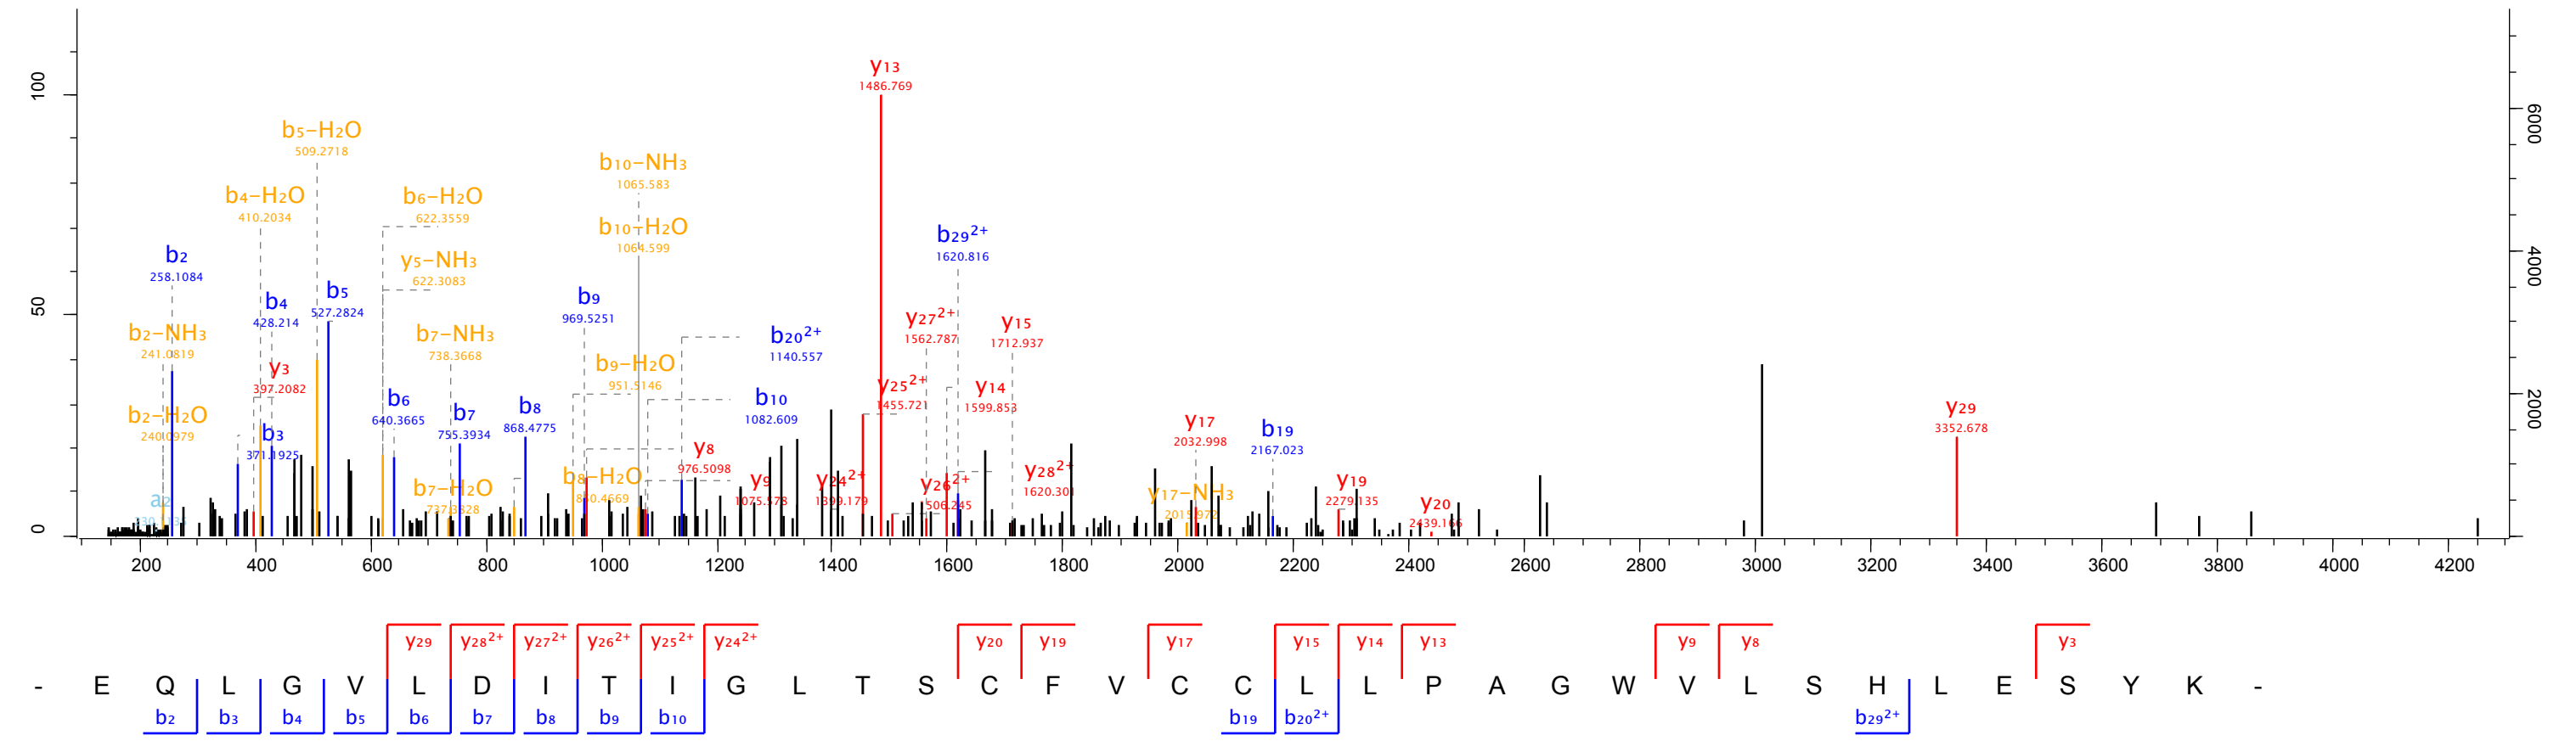

Raw file  
20150307\_Hepa3\_Top\_opt\_D3\_01\_1689

Scan 6594 Method TOF; CID Score 166.69 m/z 555.27 Gene names Mfsd1

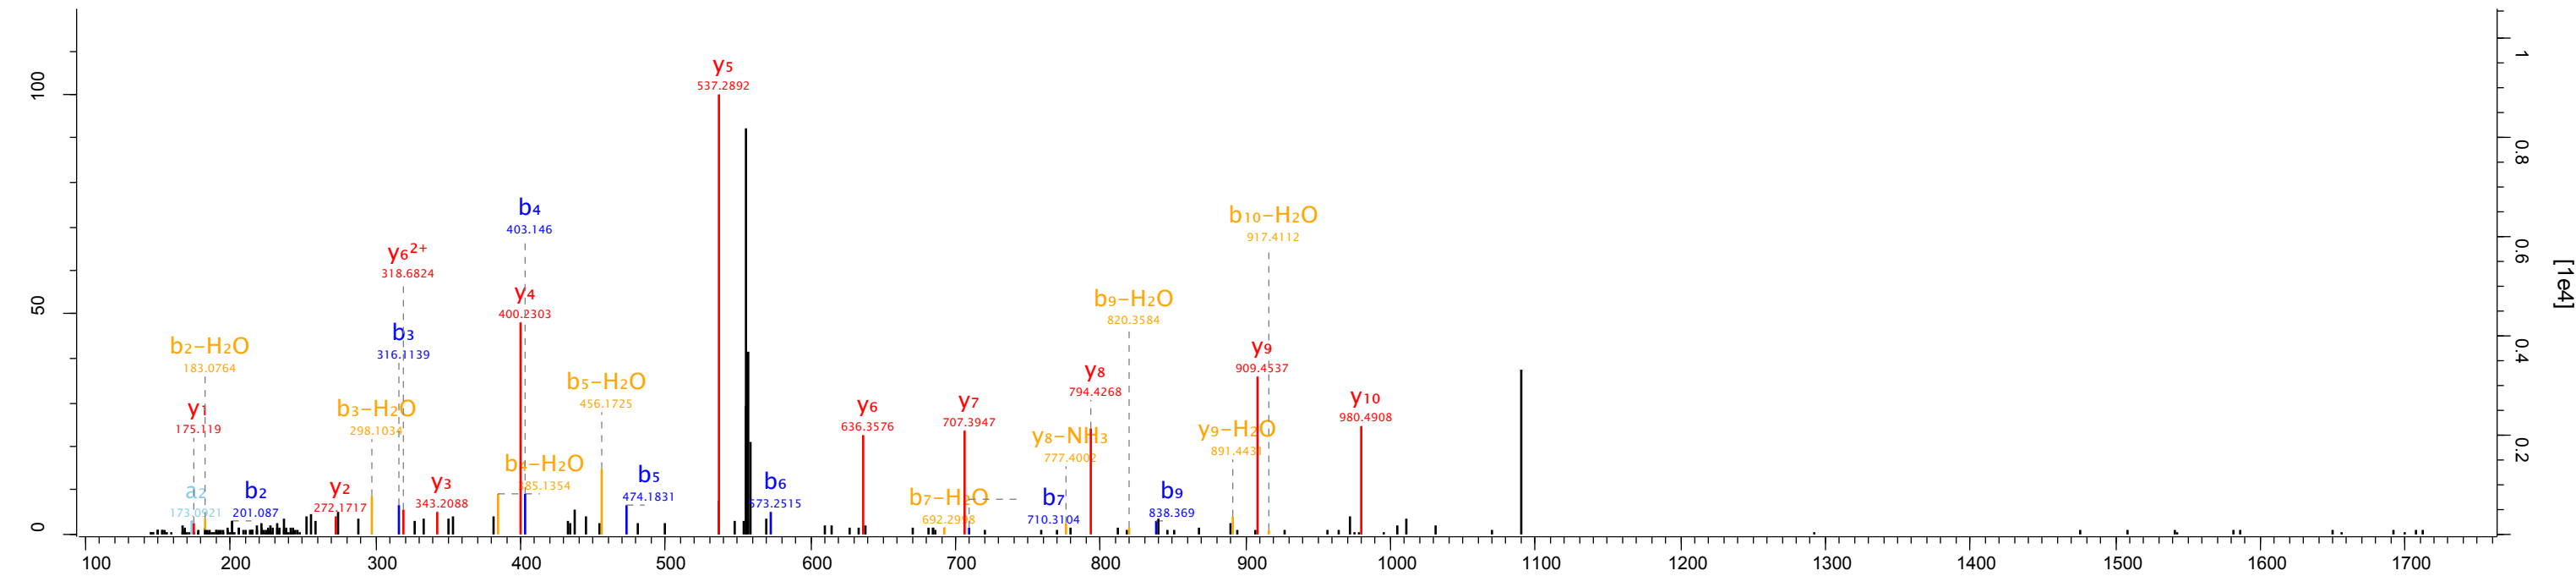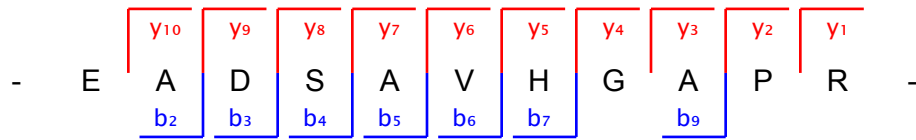



Raw file  
20150307\_Hepa3\_Top\_opt\_D3\_01\_1689

Scan 11454 Method TOF; CID Score 83.87 m/z 544.27 Gene names EglN1

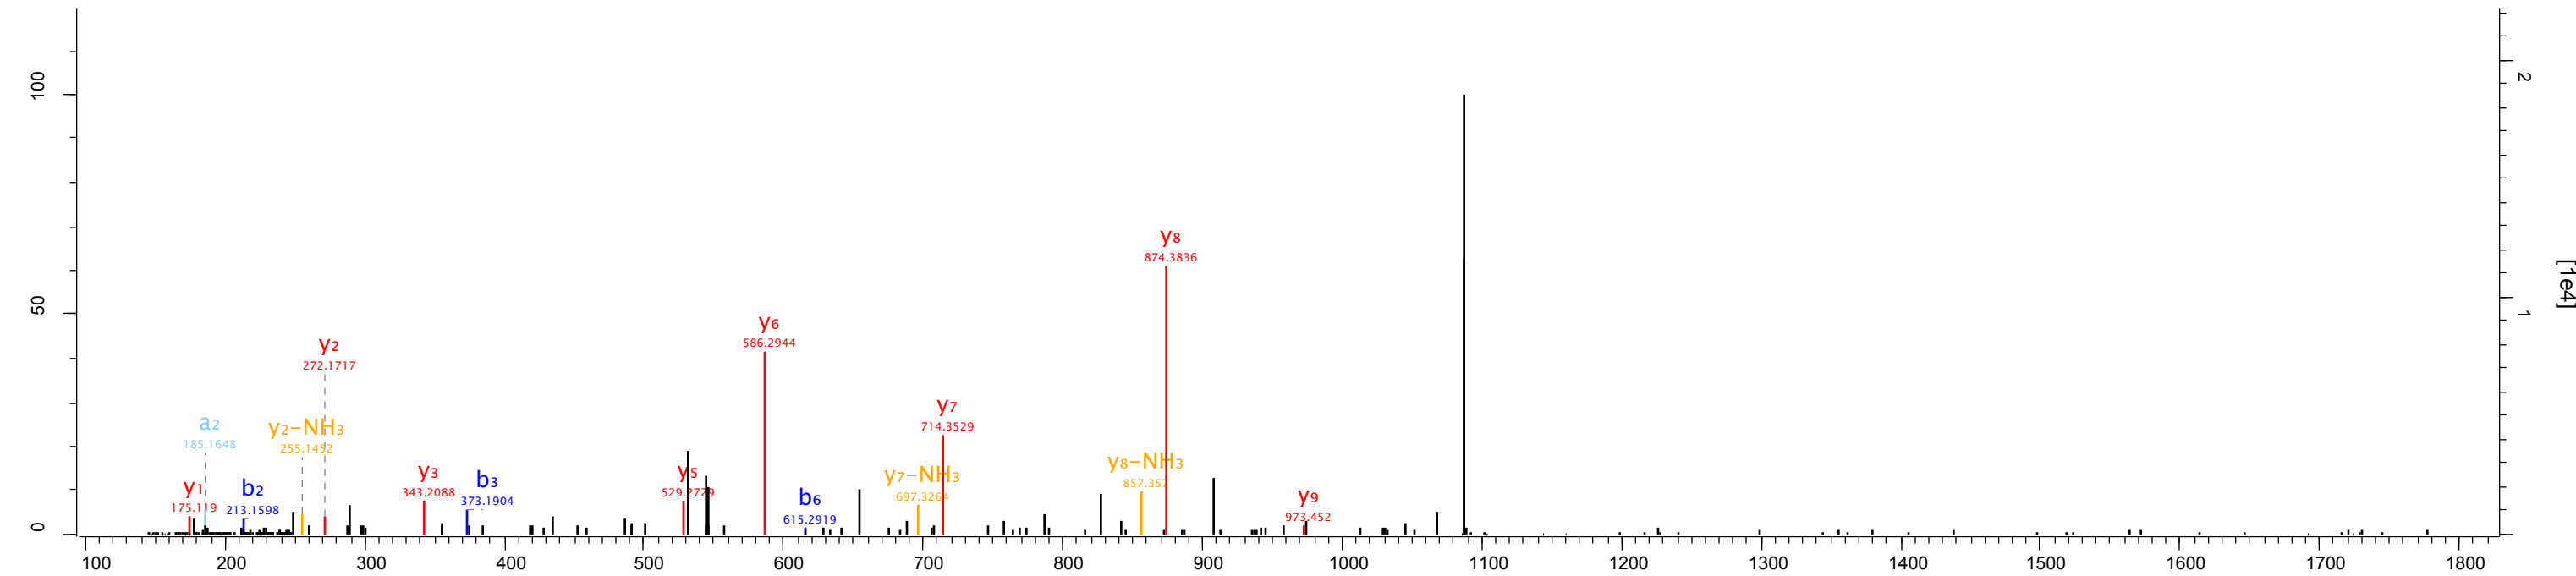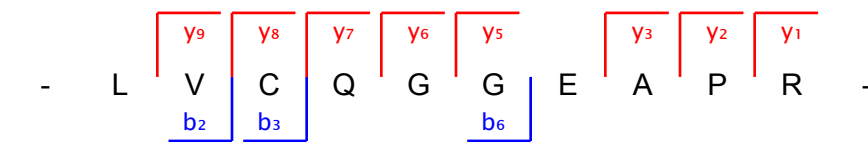

Raw file 20150307\_Hepa3\_Top\_opt\_D3\_01\_1689 Scan 11714 Method TOF; CID Score 74.61 m/z 695.32 Gene names Tspan2

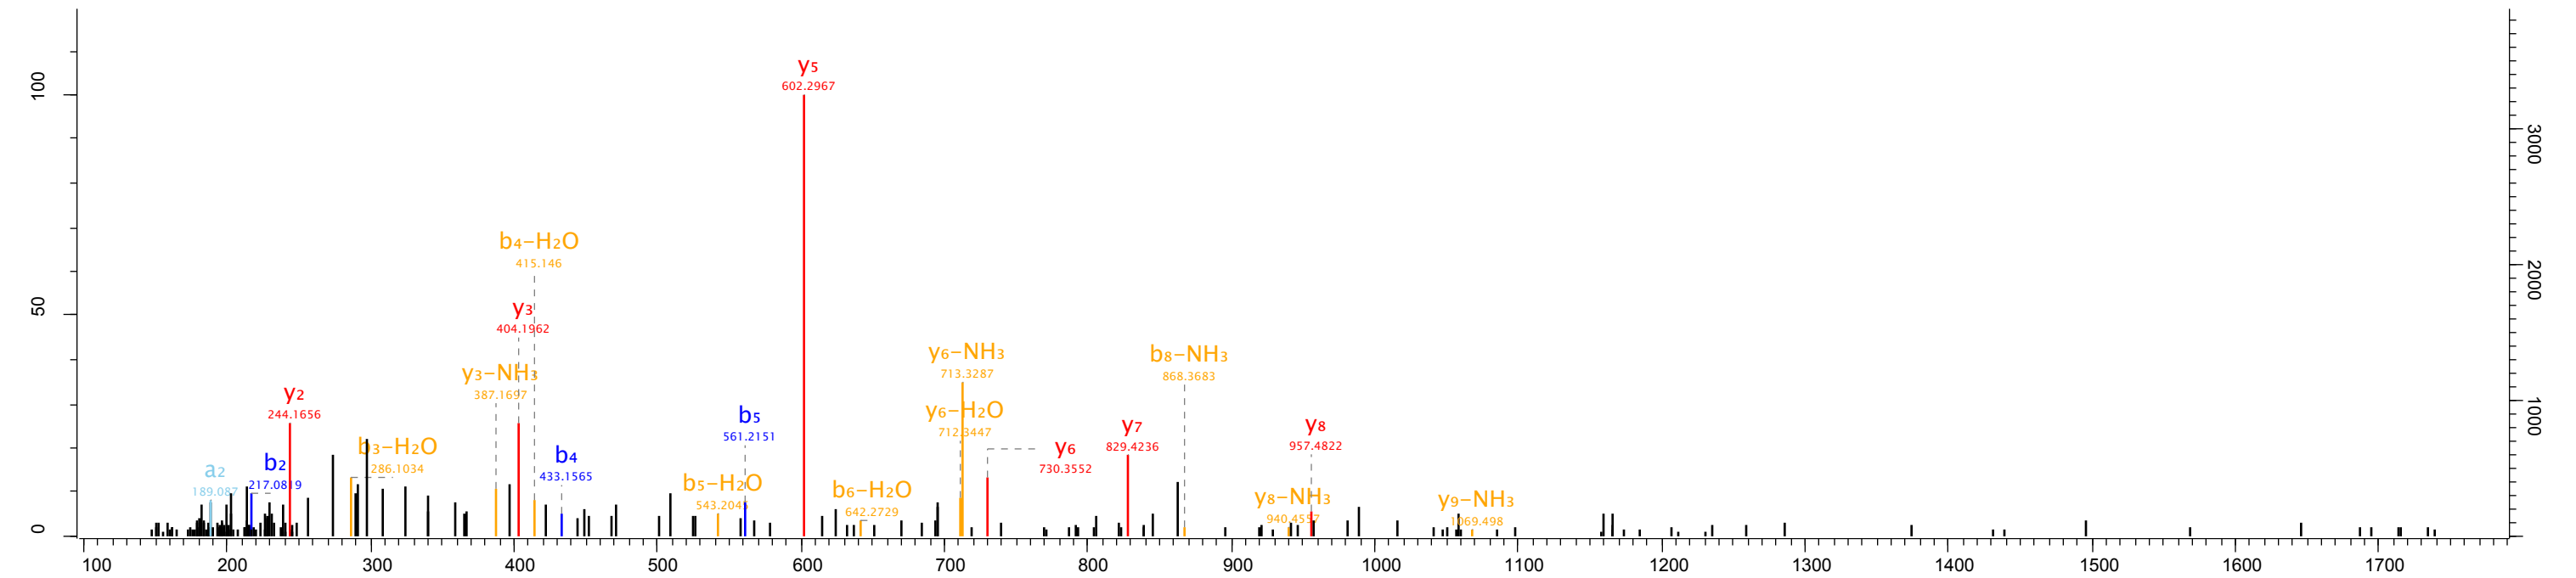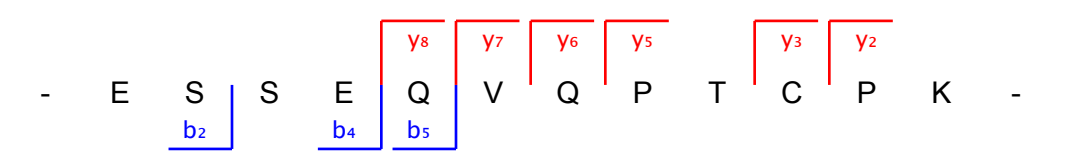

Raw file: 20150307\_Hepa3\_Top\_opt\_D3\_01\_1689  
 Scan: 14054 Method: TOF; CID Score: 84.17 m/z: 638.3 Gene names: Nudt1

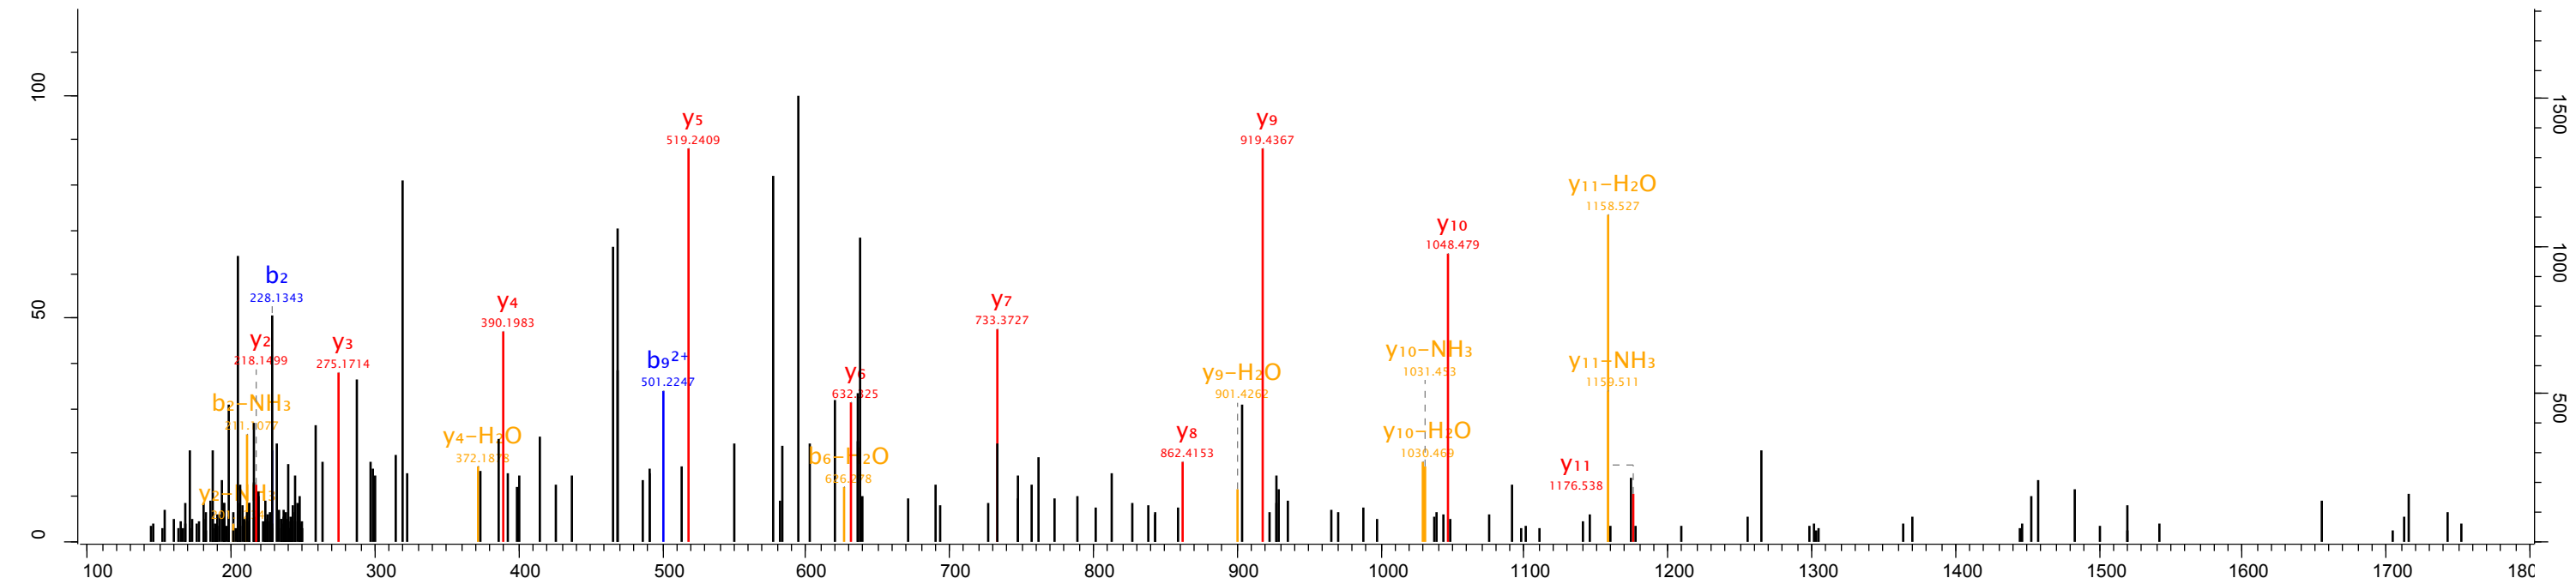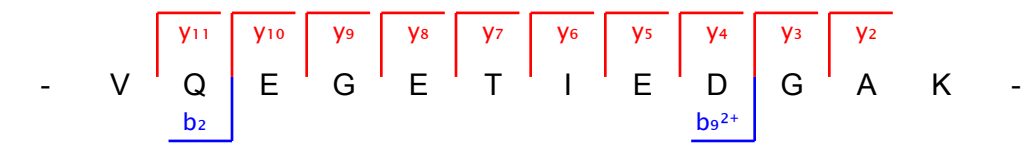

Raw file 20150307\_Hepa3\_Top\_opt\_D3\_01\_1689 Scan 18676 Method TOF; CID Score 40.72 m/z 685.33 Gene names Kmt2d

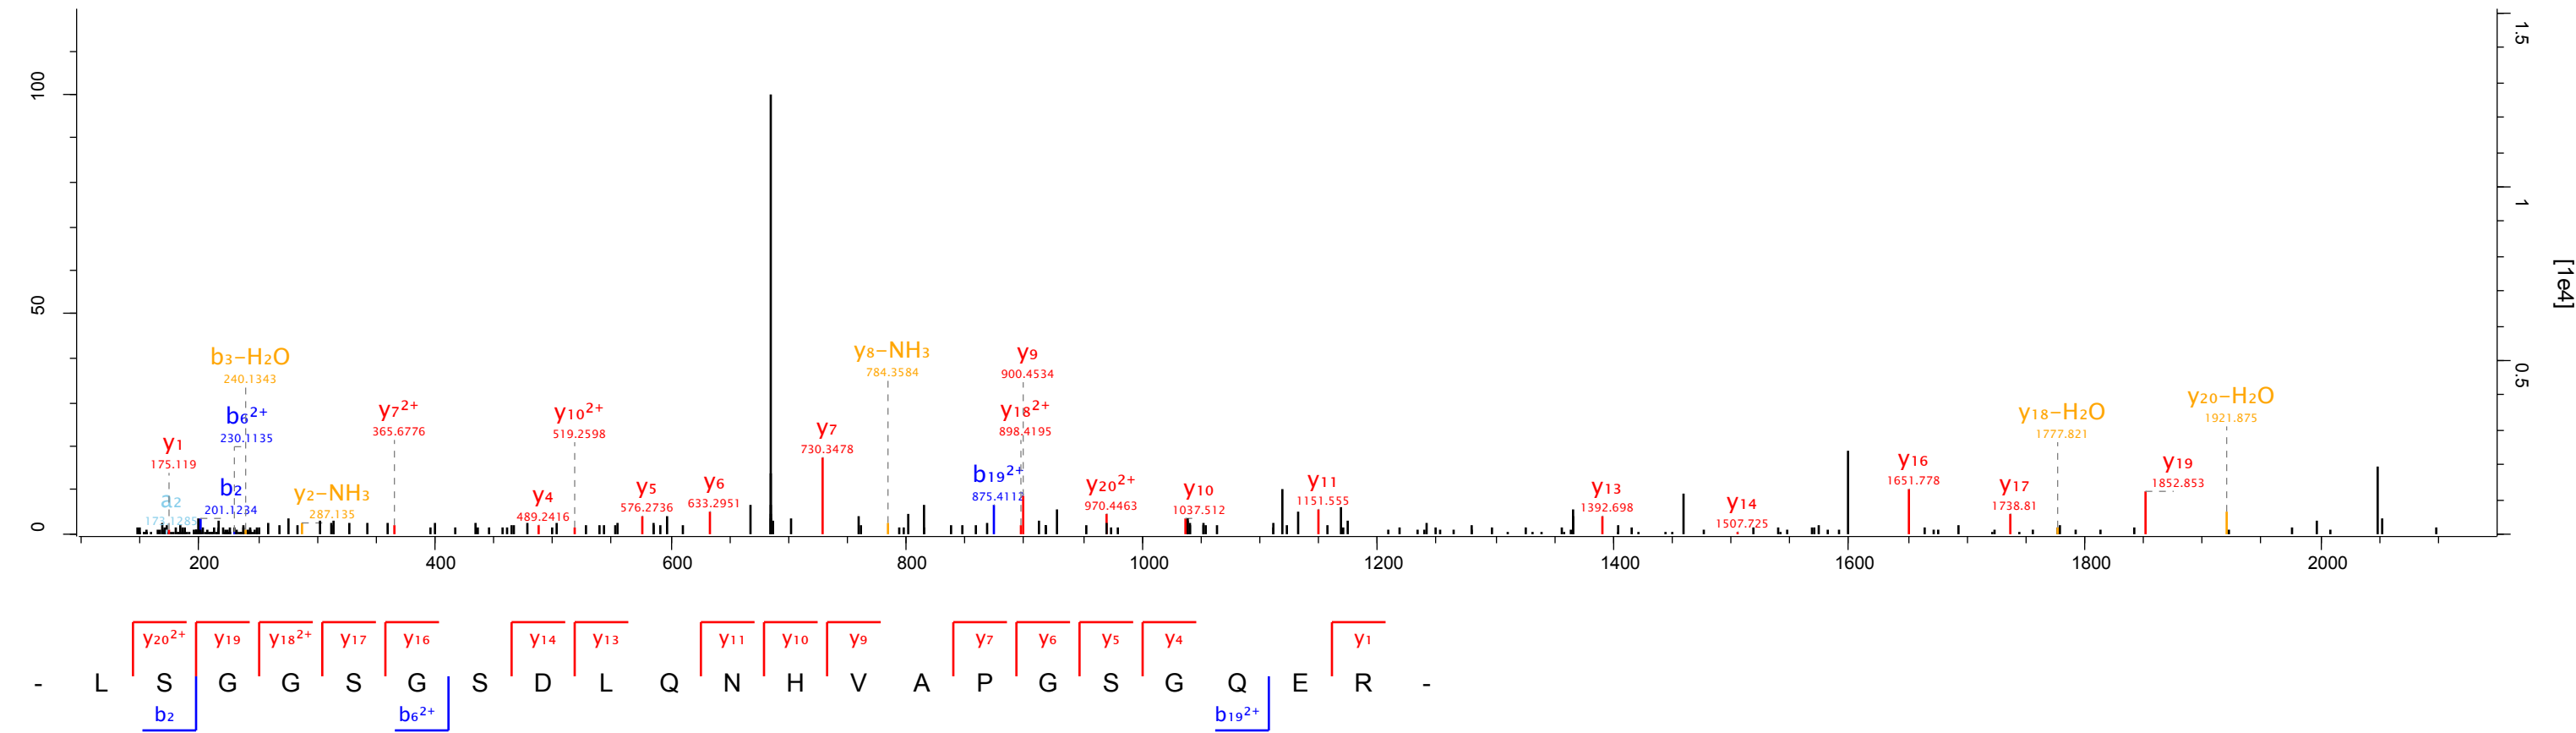

Raw file 20150307\_Hepa3\_Top\_opt\_D3\_01\_1689 Scan 20387 Method TOF; CID Score 56.57 m/z 658.84 Gene names Banp

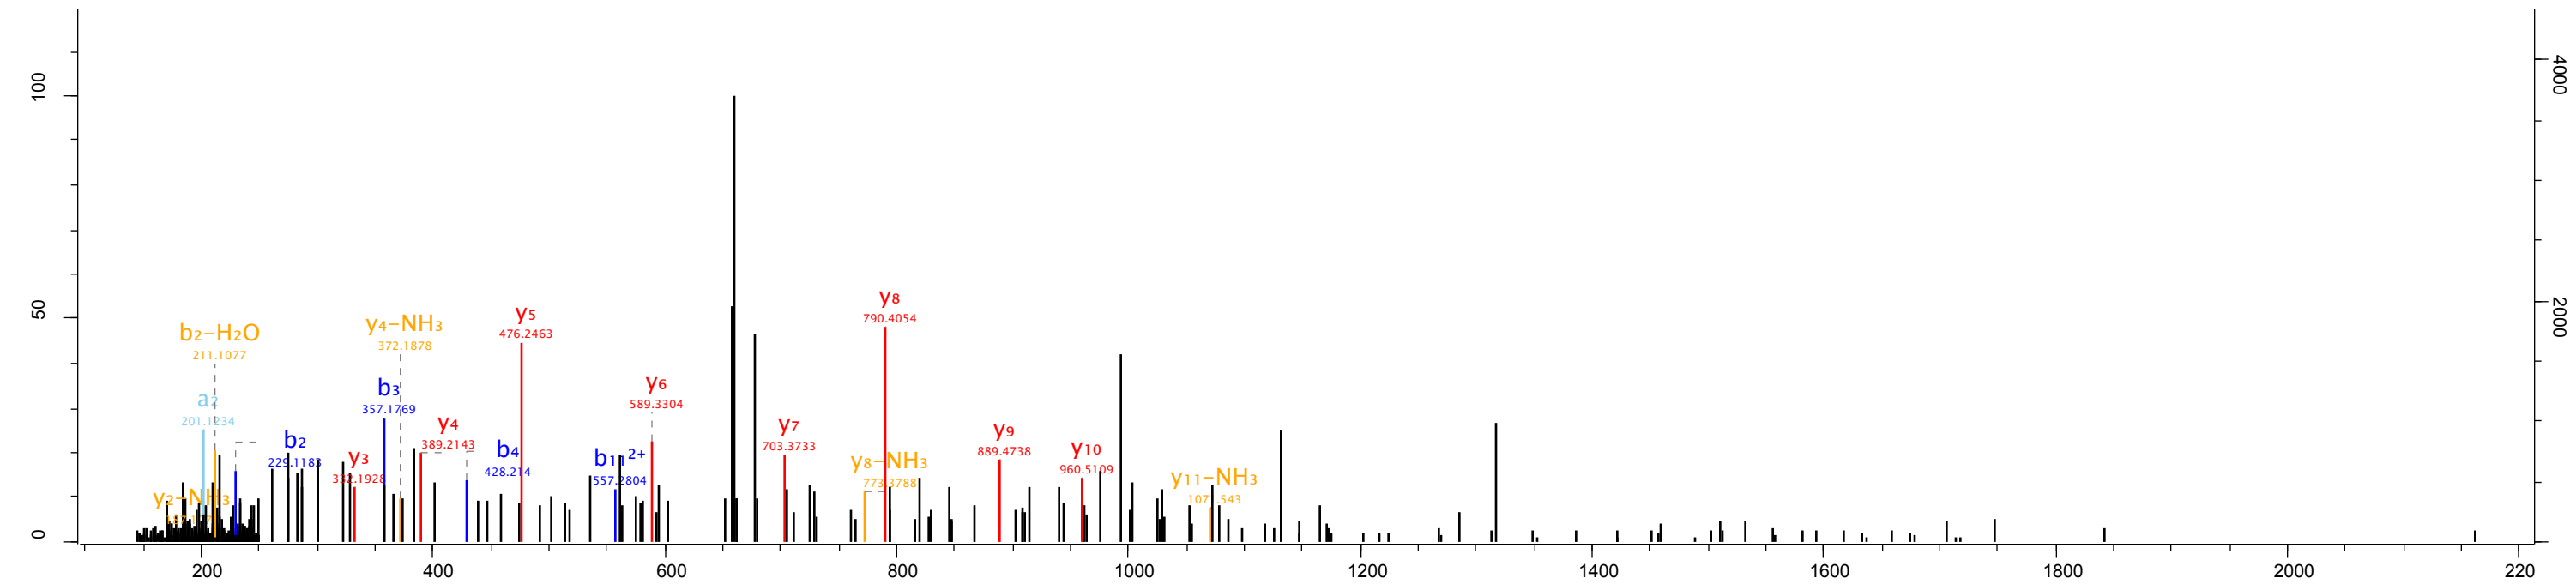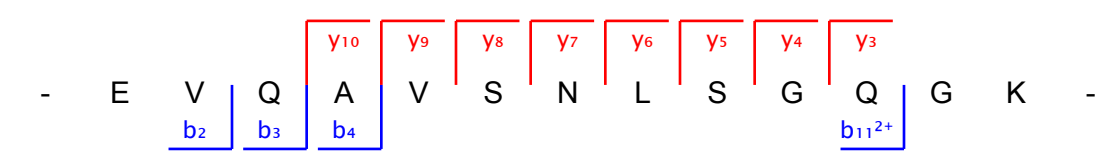

Raw file 20150307\_Hepa3\_Top\_opt\_D3\_01\_1689 Scan 45529 Method TOF; CID Score 42.56 m/z 692 Gene names Cd99

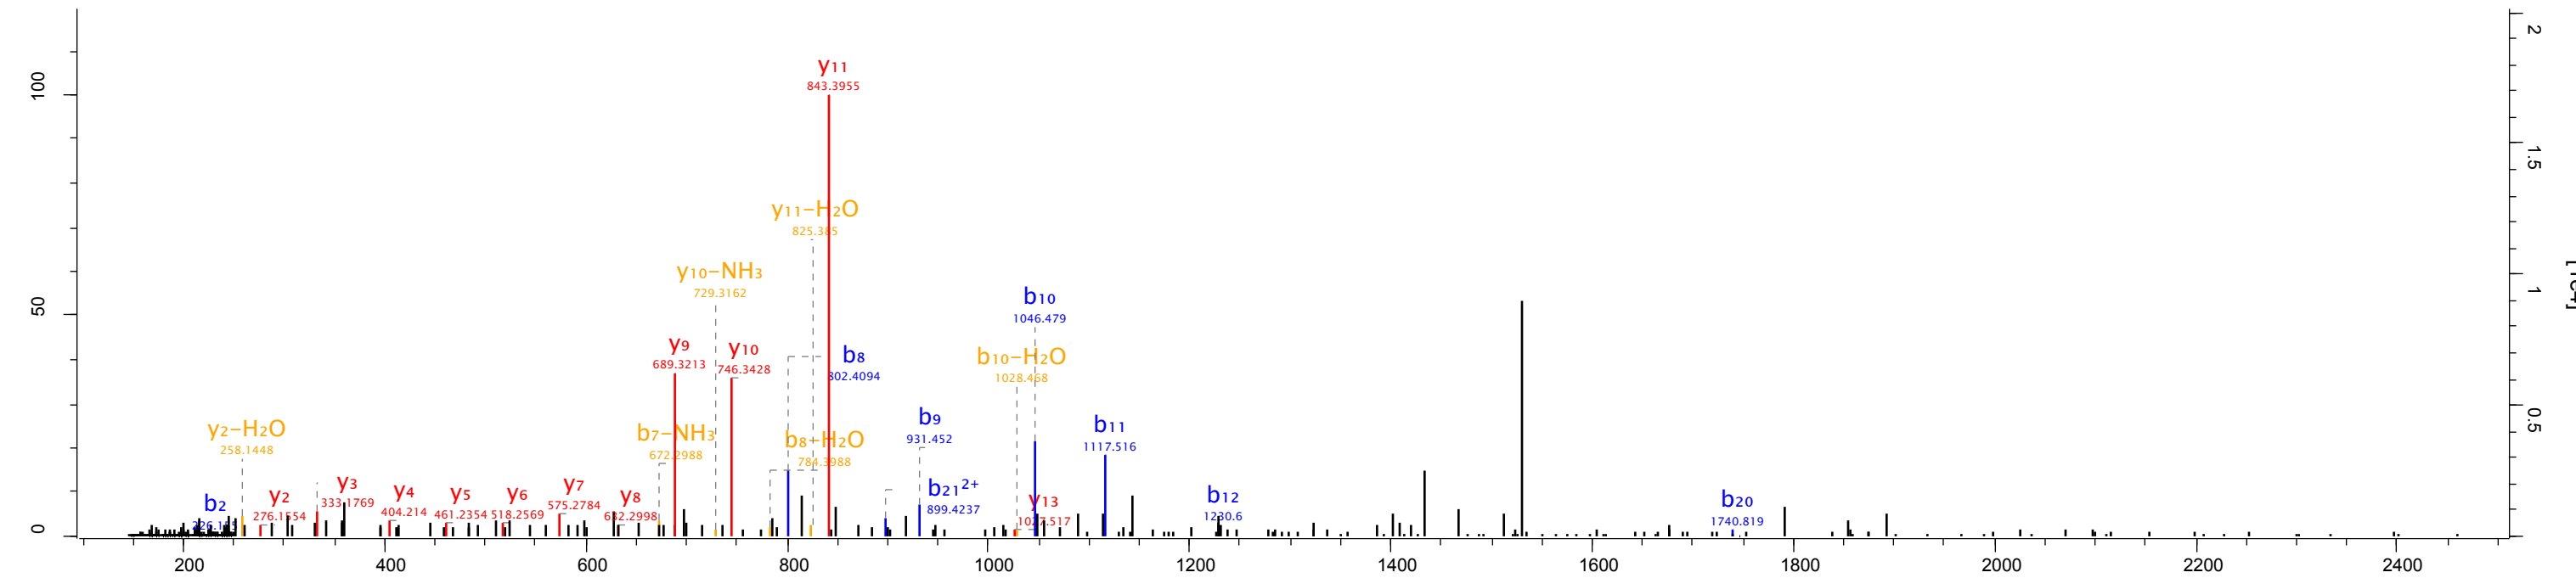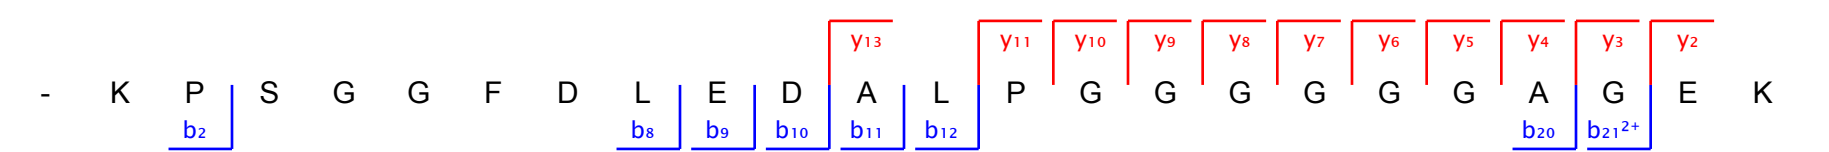

Raw file  
20150307\_Hepa3\_Top\_opt\_D3\_01\_1689

Scan 48369 Method TOF; CID Score 72.89 m/z 738.88 Gene names Fitm2

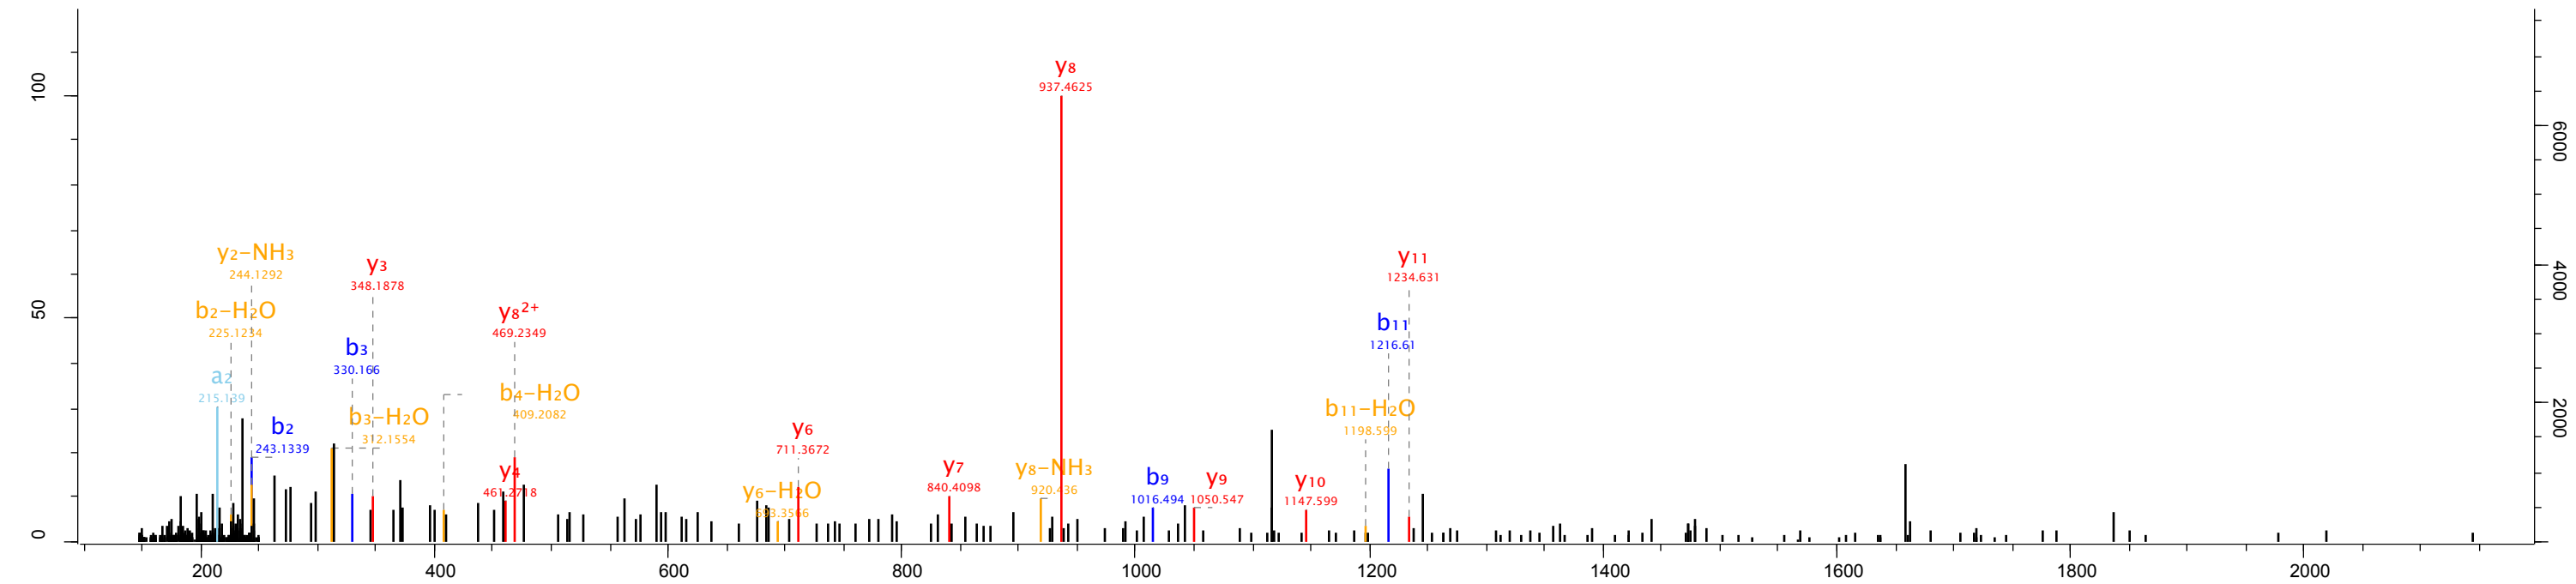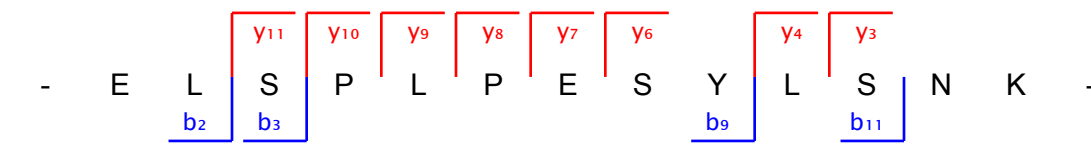

Raw file: 20150307\_Hepa3\_Top\_opt\_D3\_01\_1689  
 Scan: 49165 Method: TOF; CID Score: 99.44 m/z: 504.72 Gene names: Tmem258

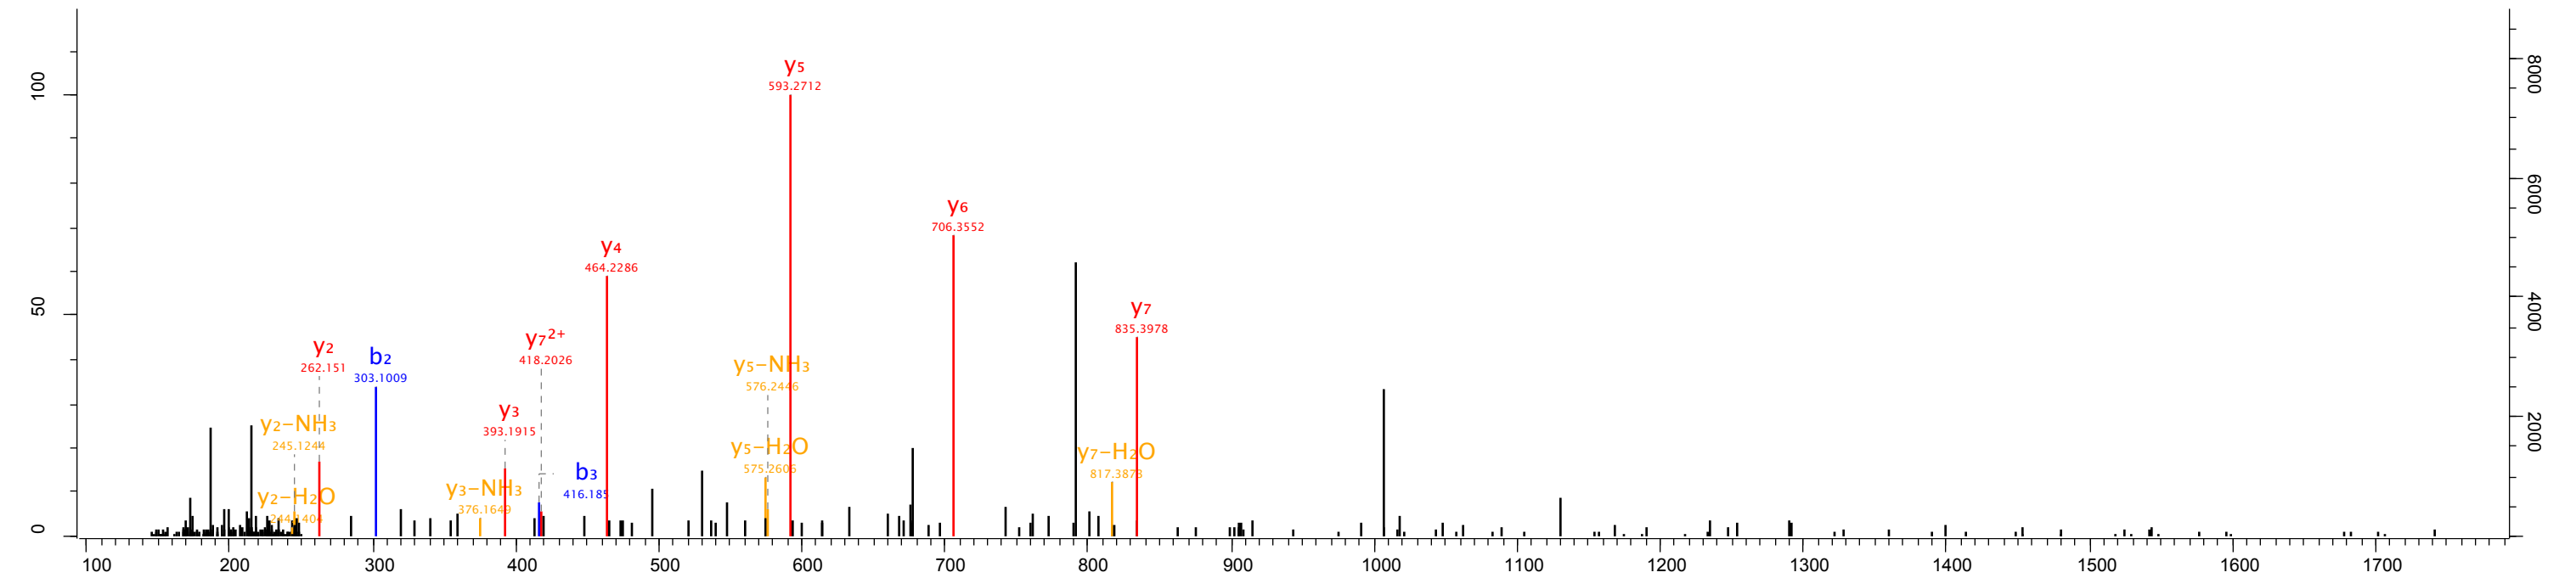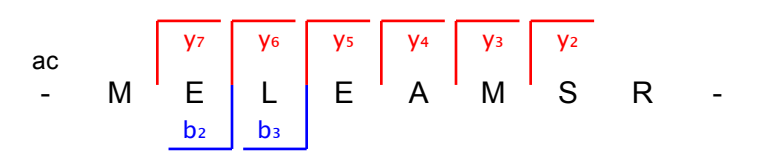



Raw file 20150307\_Hepa3\_Top\_opt\_D3\_01\_1689 Scan 51662 Method TOF; CID Score 66.22 m/z 775.89 Gene names Mbd1

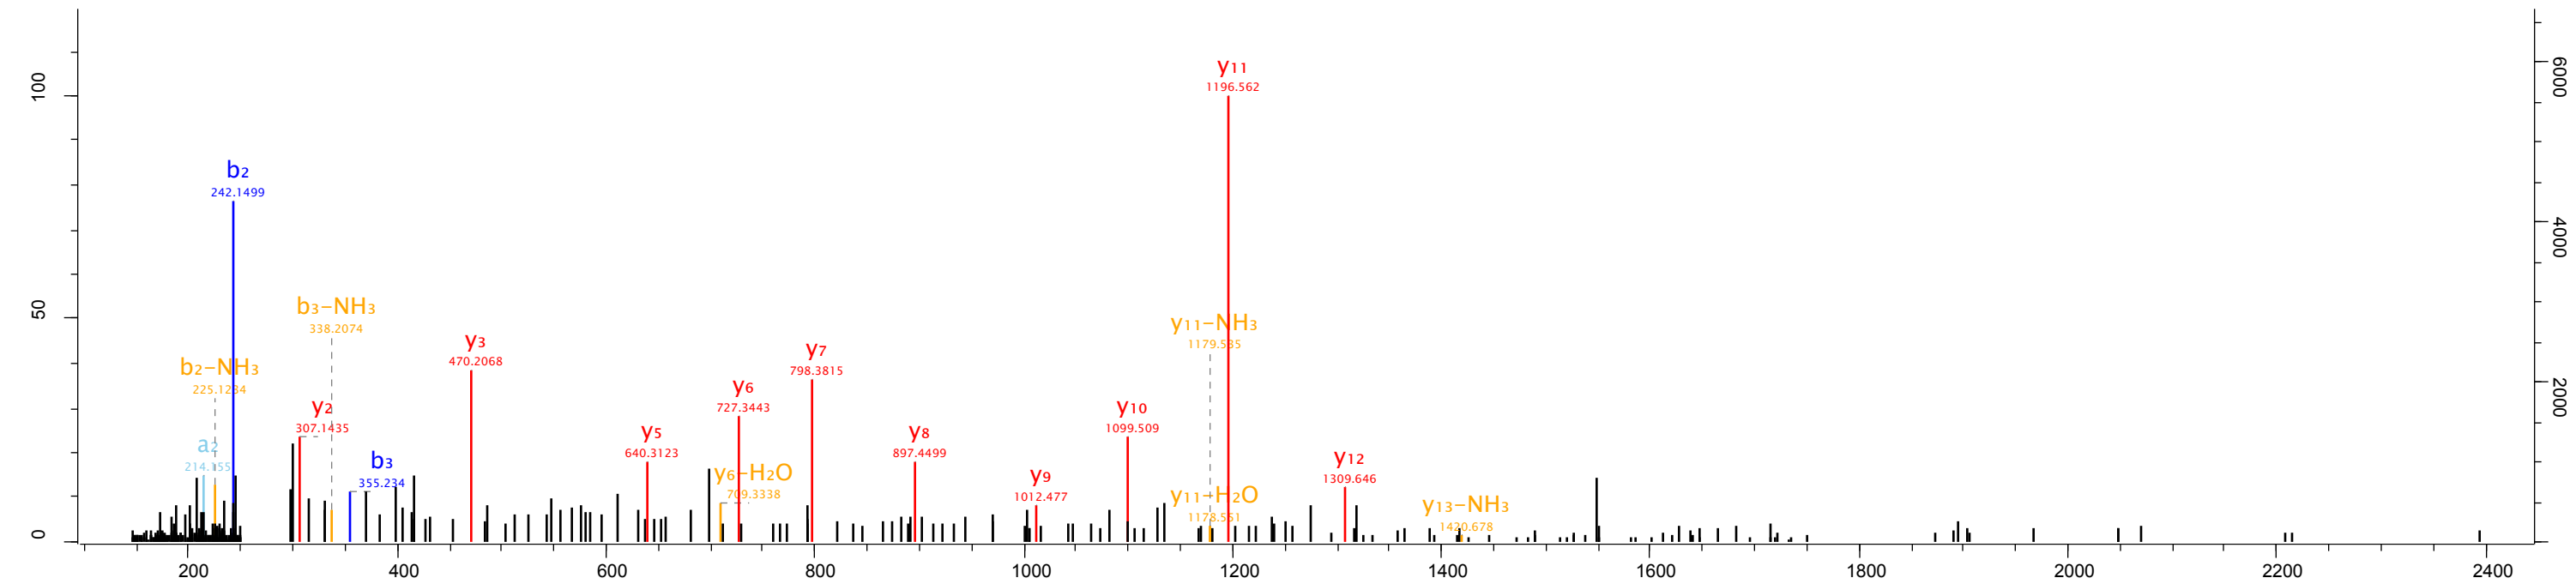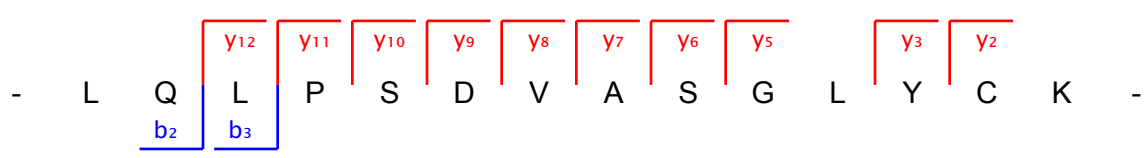

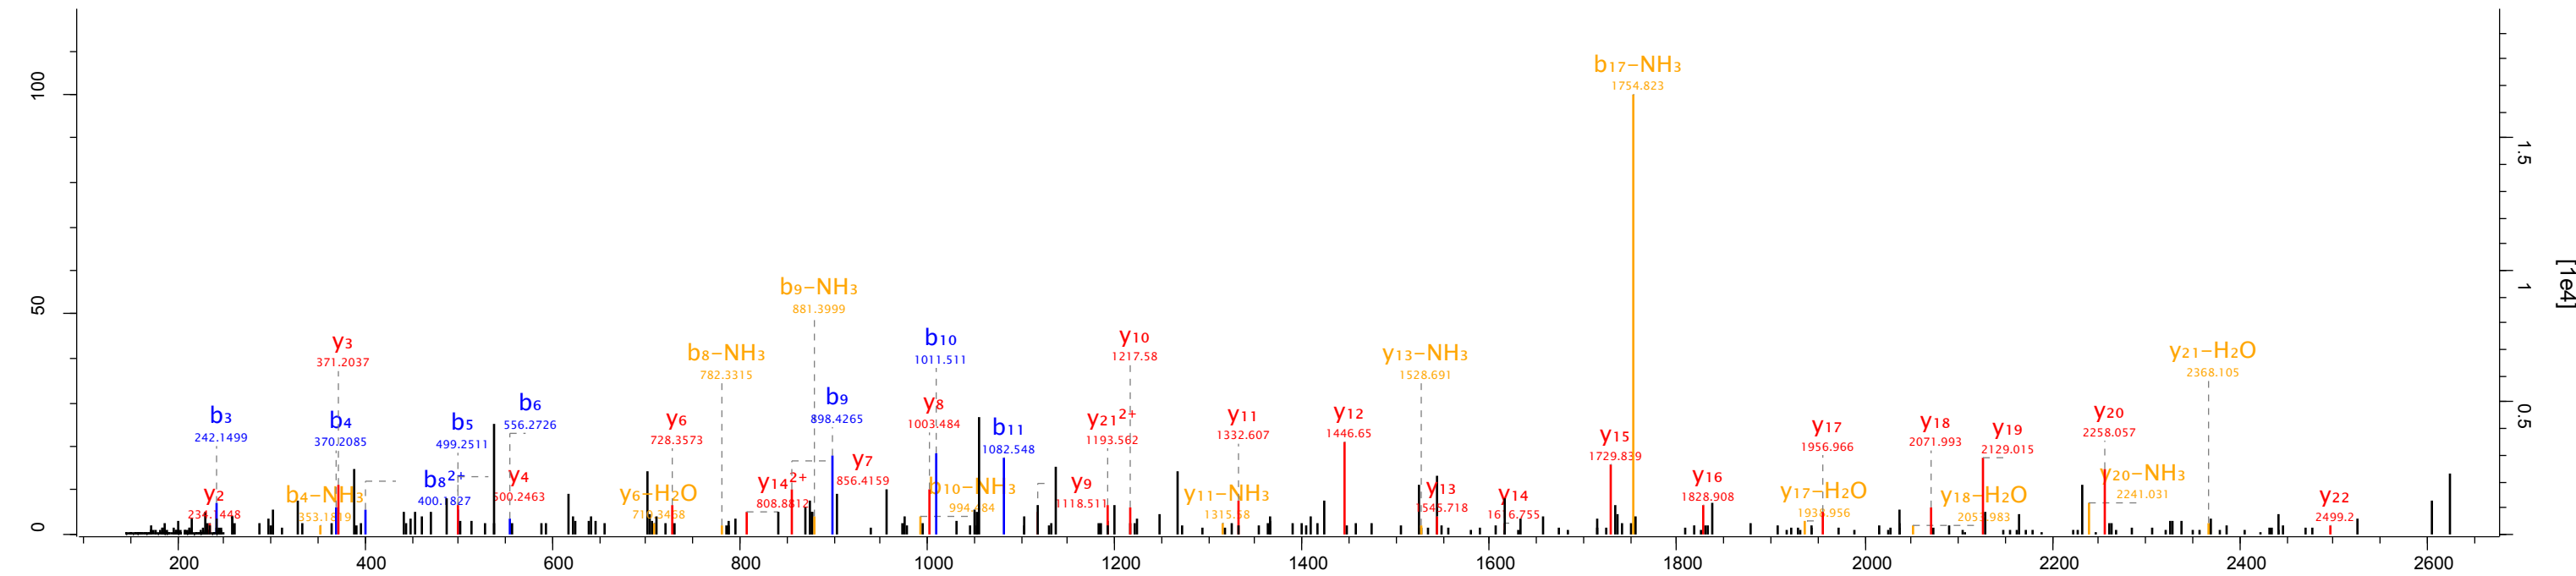

- A G L Q E G D Q V L A V N D V D F Q D I E H S K -

b3 b4 b5 b6 b8-2+ b9 b10 b11

y22 y21-2+ y20 y19 y18 y17 y16 y15 y14 y13 y12 y11 y10 y9 y8 y7 y6 y4 y3 y2

Raw file: 20150307\_Hepa3\_Top\_opt\_D3\_01\_1689  
 Scan: 54983 Method: TOF; CID Score: 80.17 m/z: 471.8 Gene names: Rhebl1

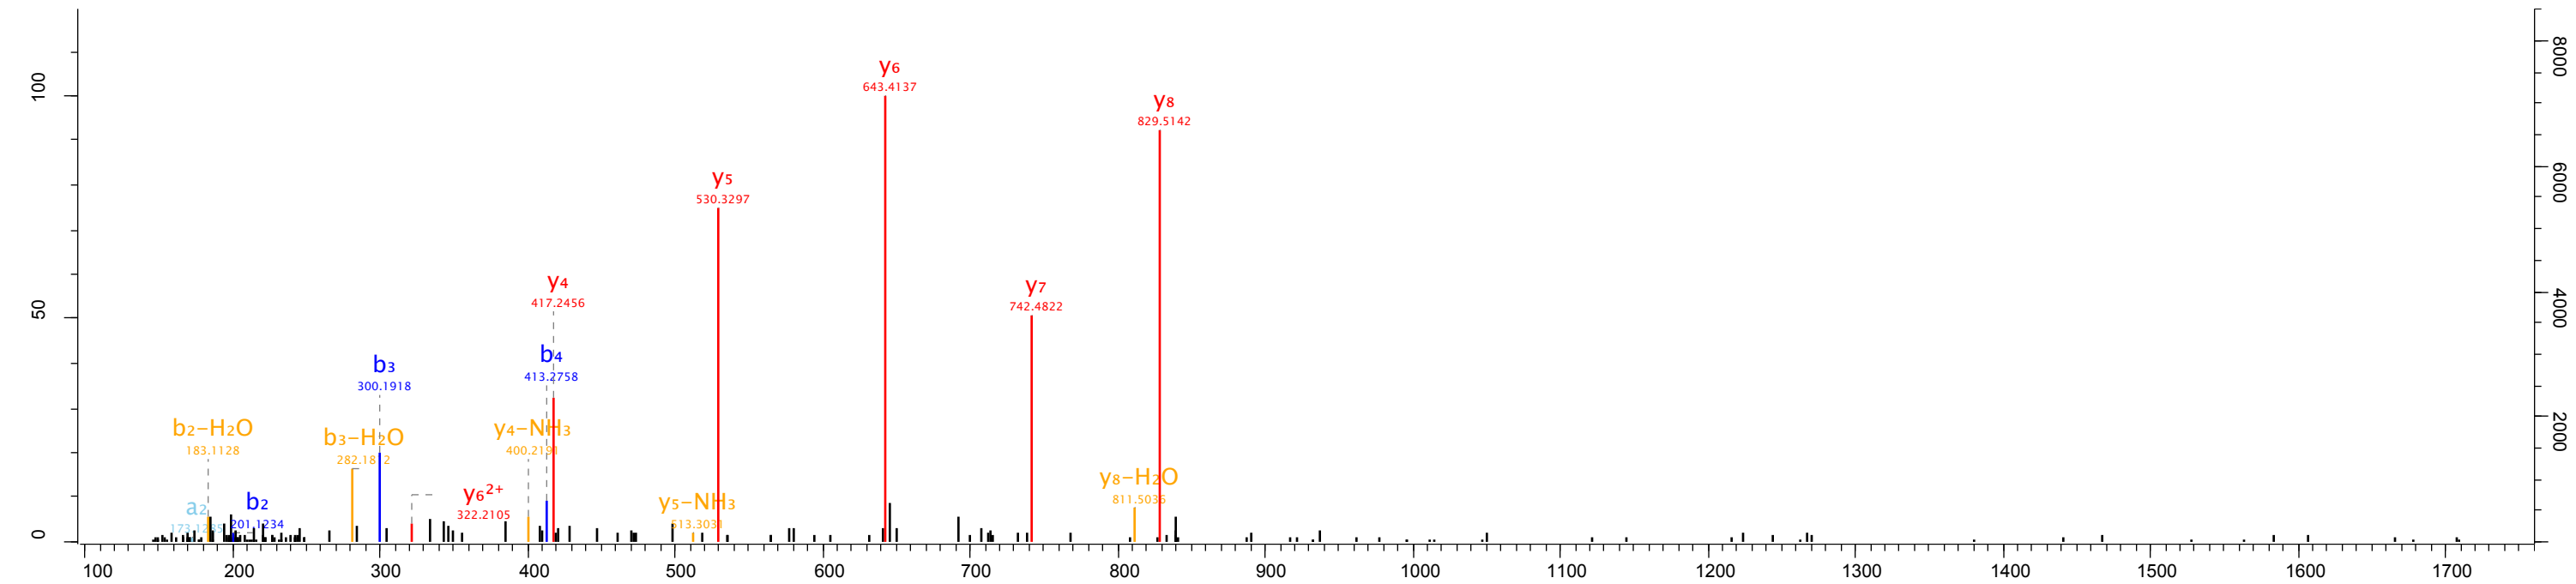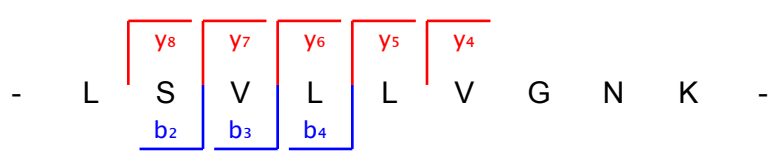

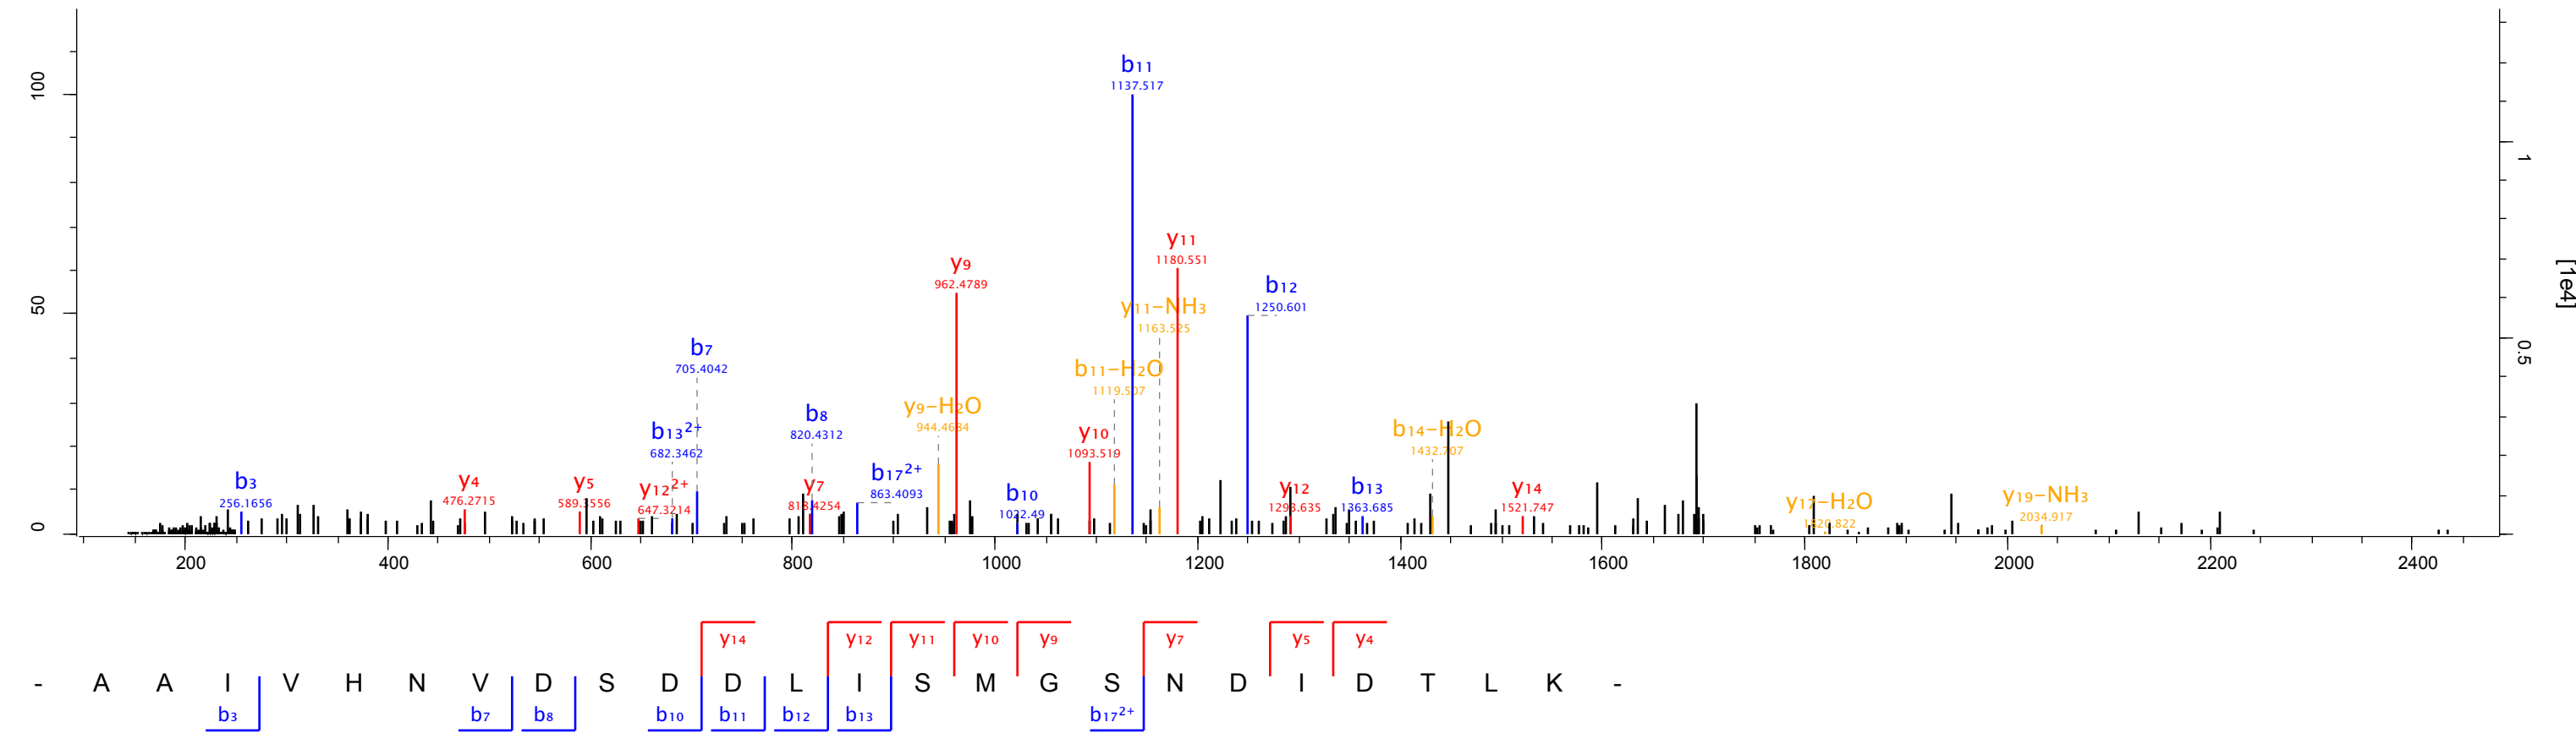

Raw file 20150307\_Hepa3\_Top\_opt\_D3\_01\_1689 Scan 57246 Method TOF; CID Score 147.56 m/z 854.91 Gene names Ssr3

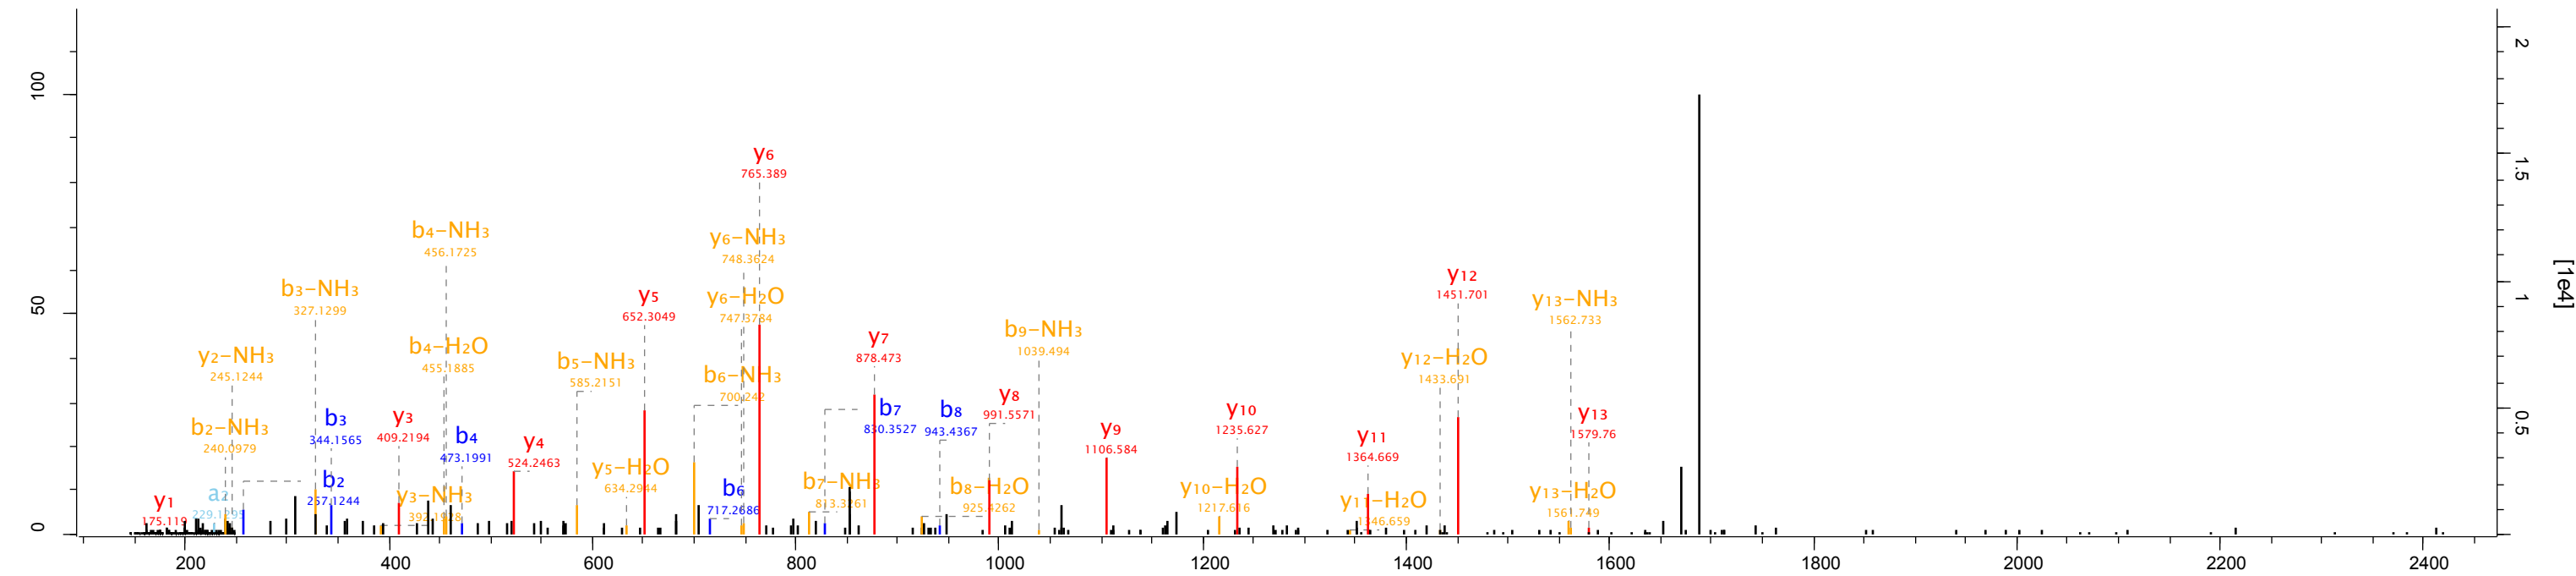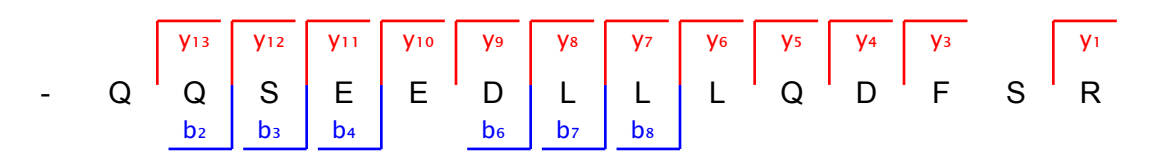

Raw file  
20150307\_Hepa3\_Top\_opt\_D3\_01\_1689

Scan 58866 Method TOF; CID Score 76.73 m/z 842.4 Gene names Trappc2;0610009B22Rik

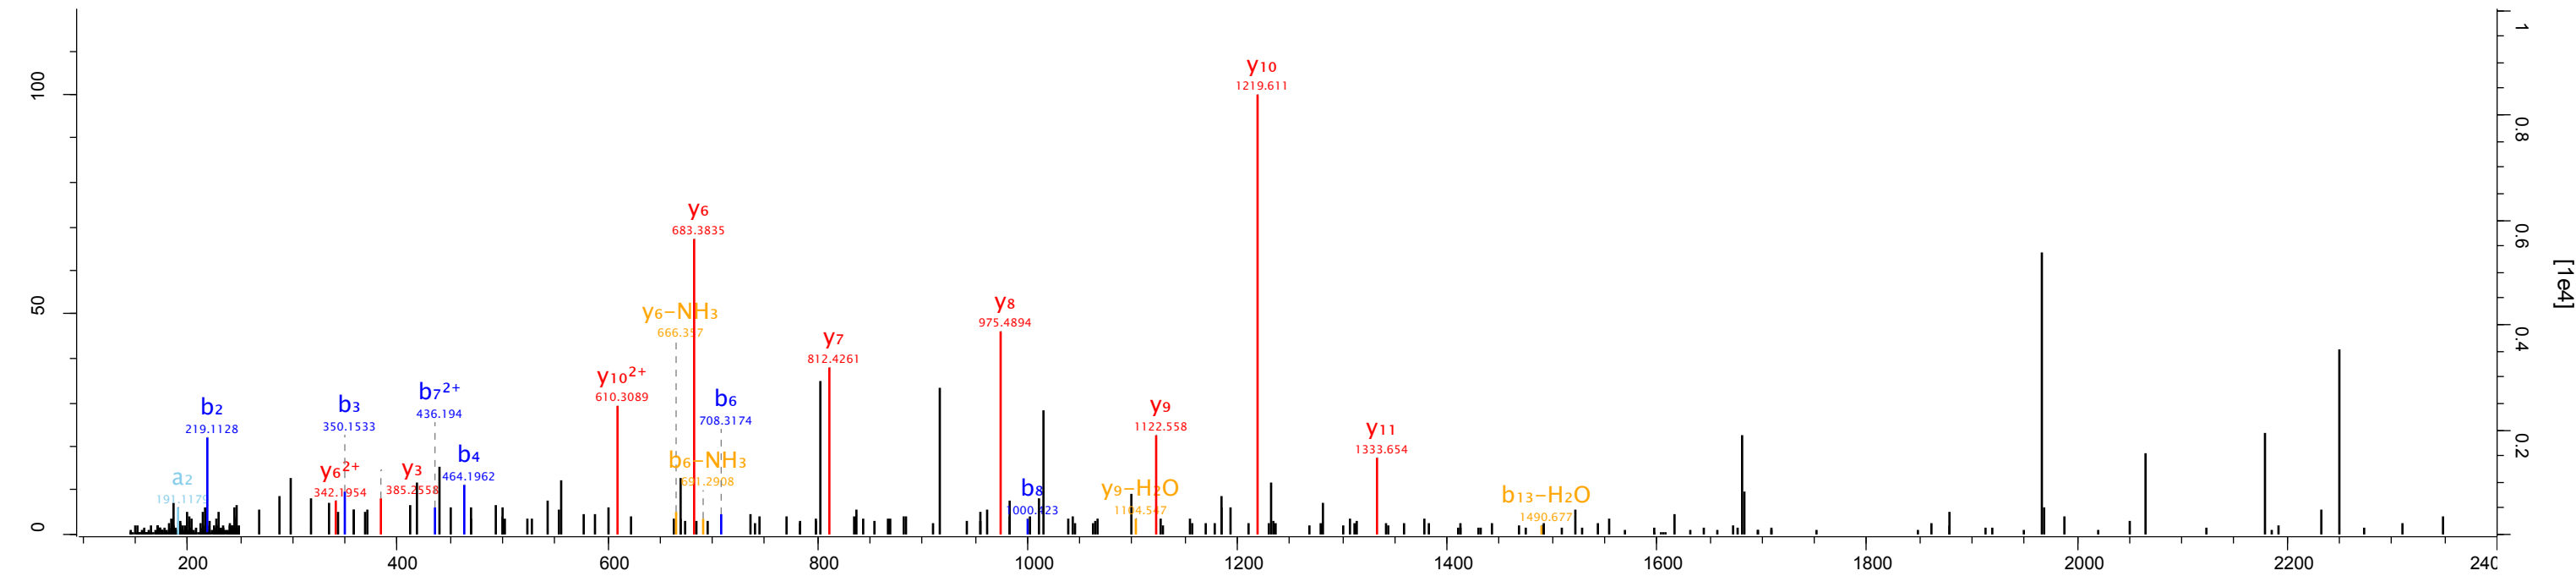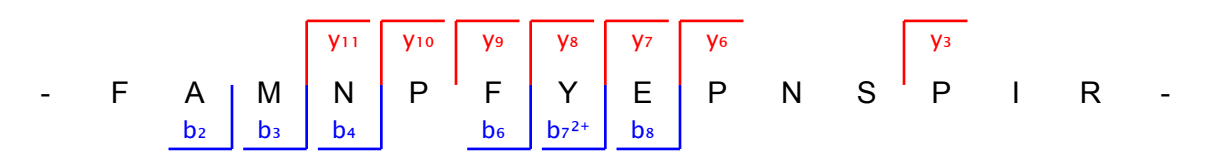

Raw file  
20150307\_Hepa3\_Top\_opt\_D3\_01\_1689

Scan 61263 Method TOF; CID Score 79.49 m/z 648.37 Gene names Tmem186

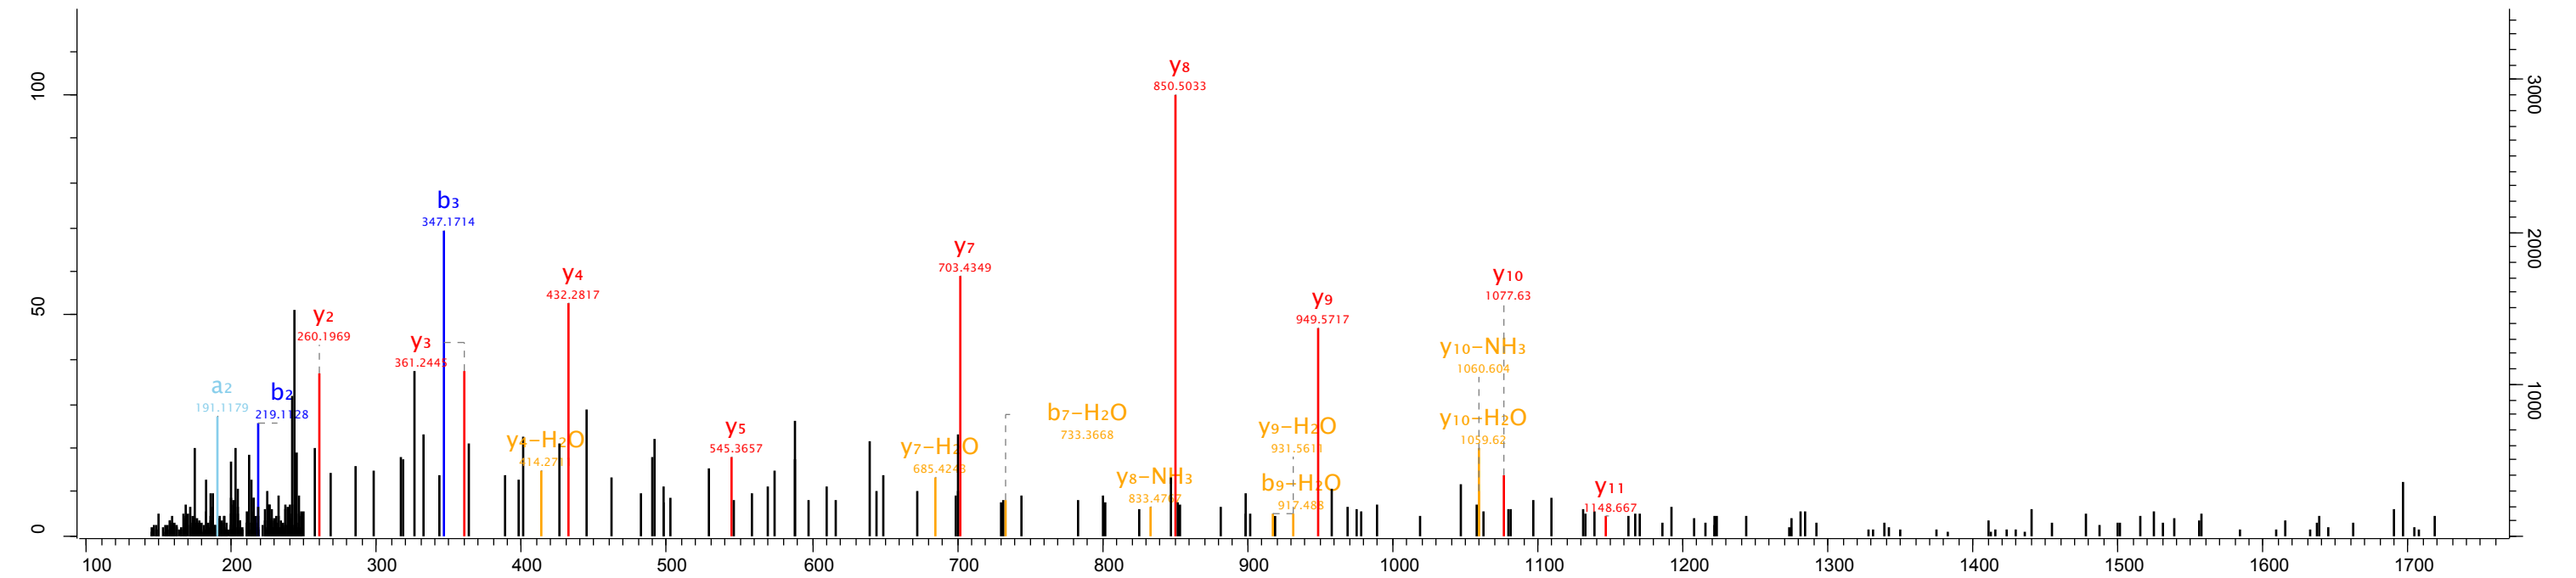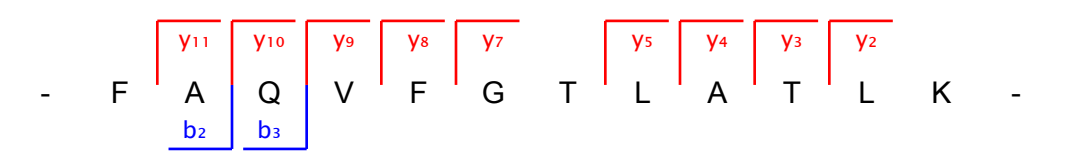

Raw file 20150307\_Hepa3\_Top\_opt\_D3\_01\_1689 Scan 63337 Method TOF; CID Score 58.04 m/z 699.39 Gene names Lpcat4

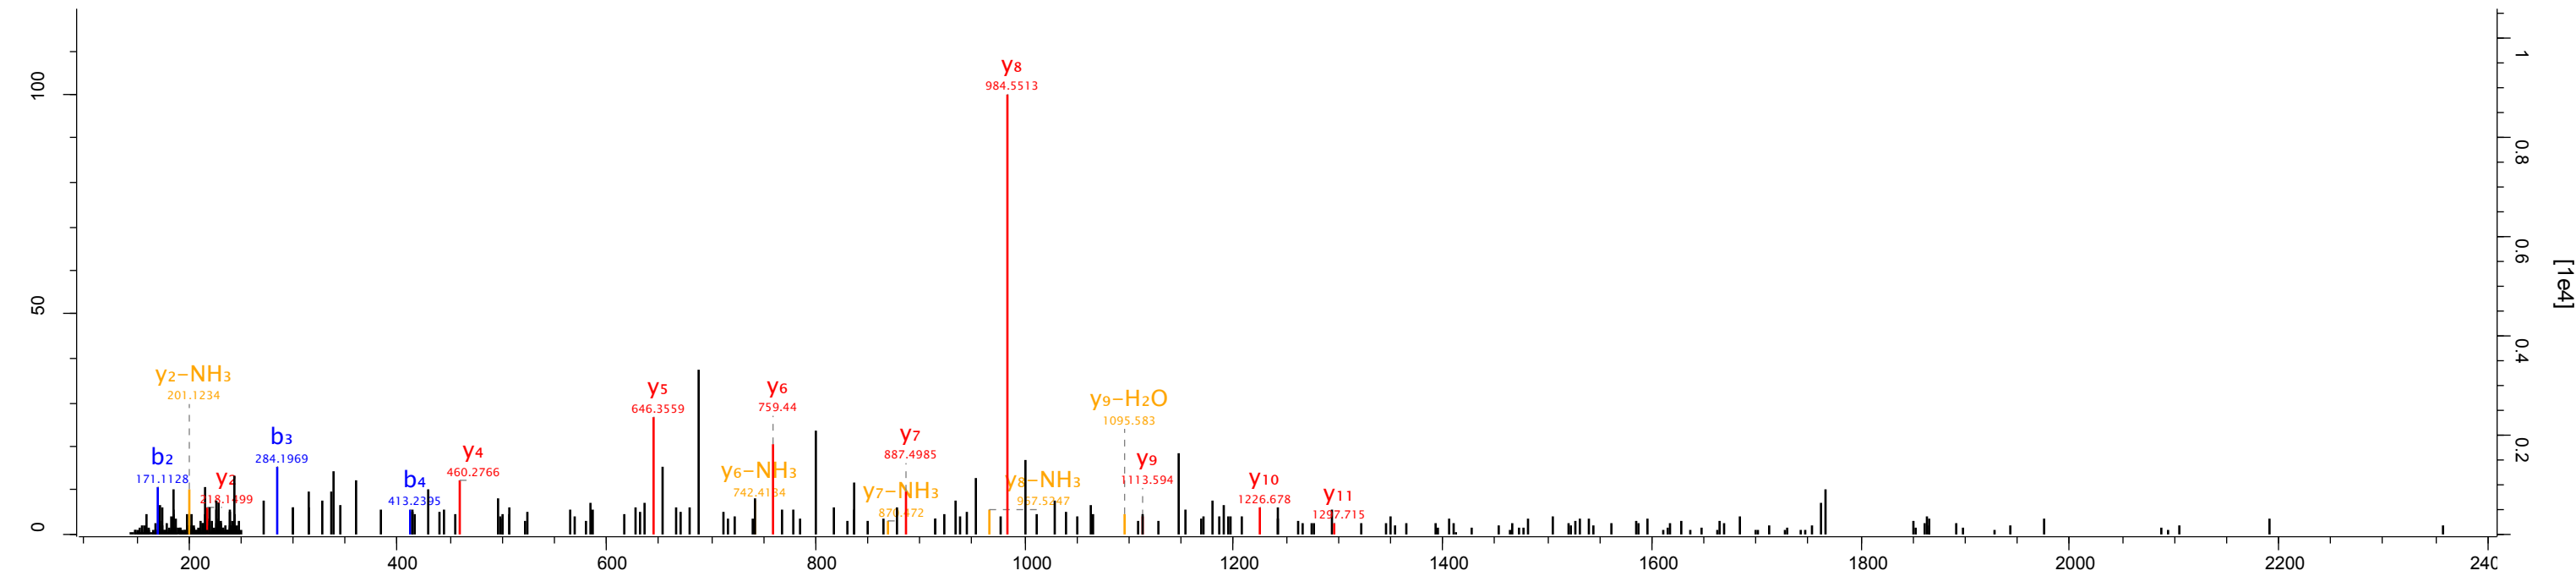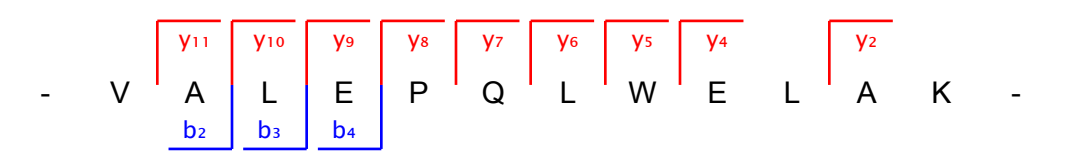



Raw file: 20150307\_Hepa3\_Top\_opt\_D3\_01\_1689  
 Scan: 63733 Method: TOF; CID Score: 64.52 m/z: 850.47 Gene names: Golga7

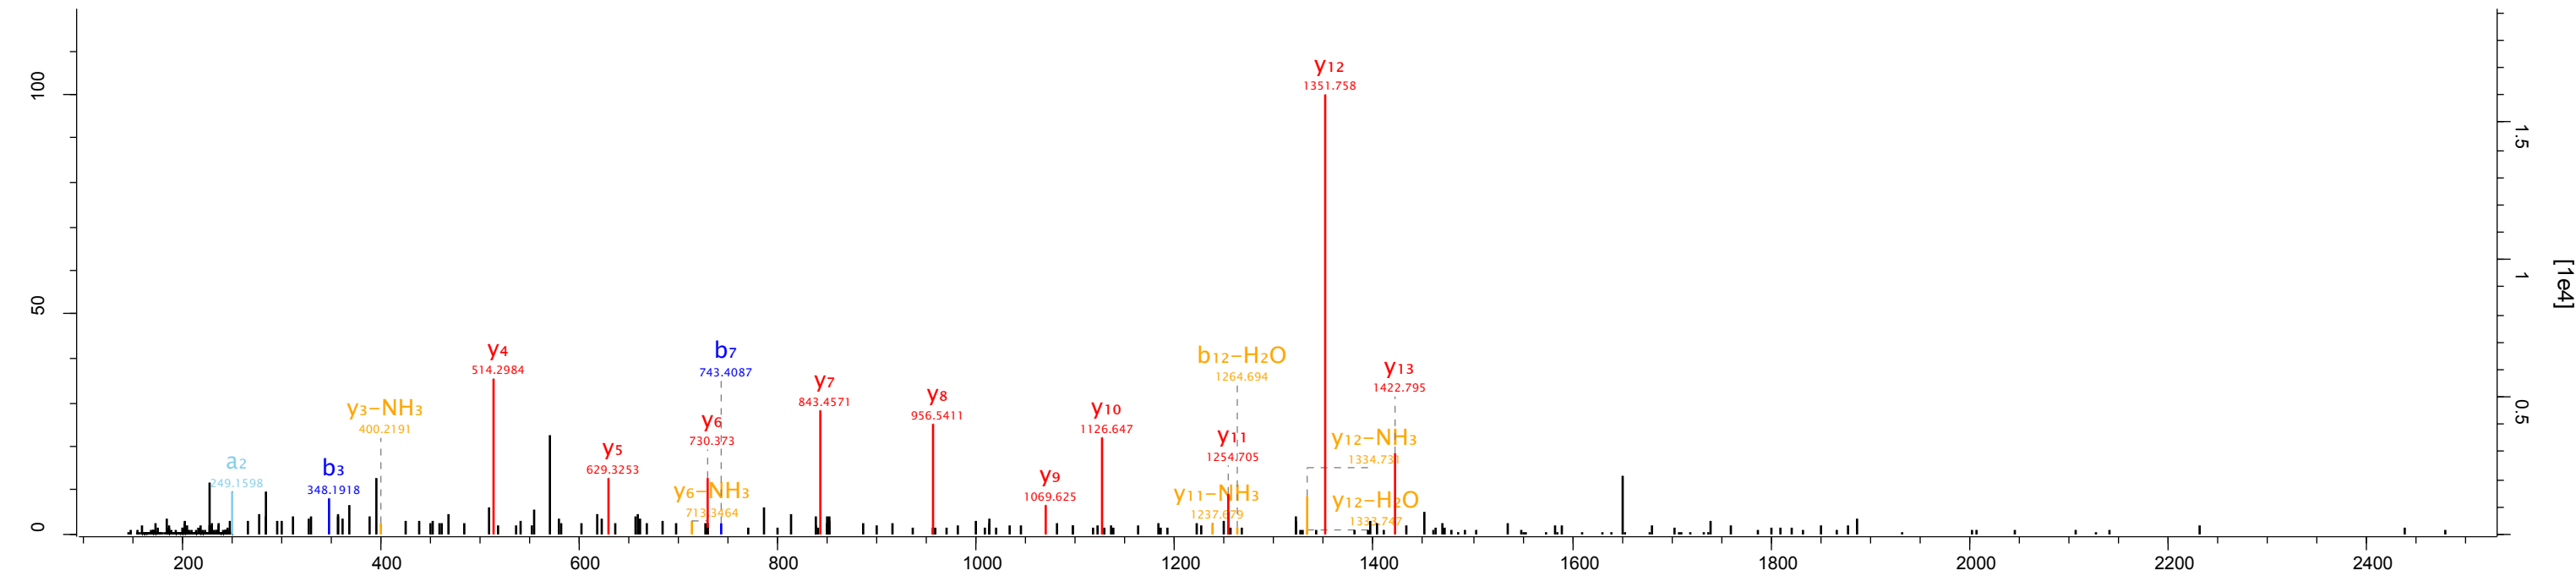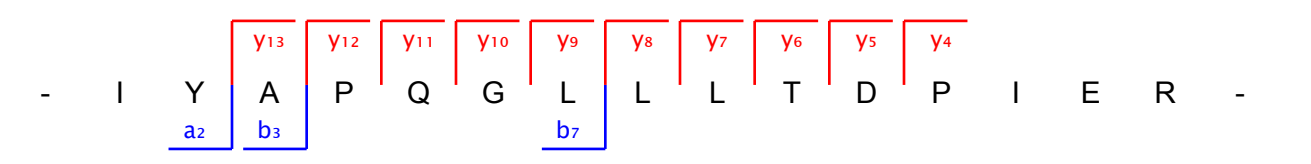

Raw file 20150307\_Hepa3\_Top\_opt\_D3\_01\_1689 Scan 68743 Method TOF; CID Score 54.76 m/z 794.74 Gene names Nlrp1

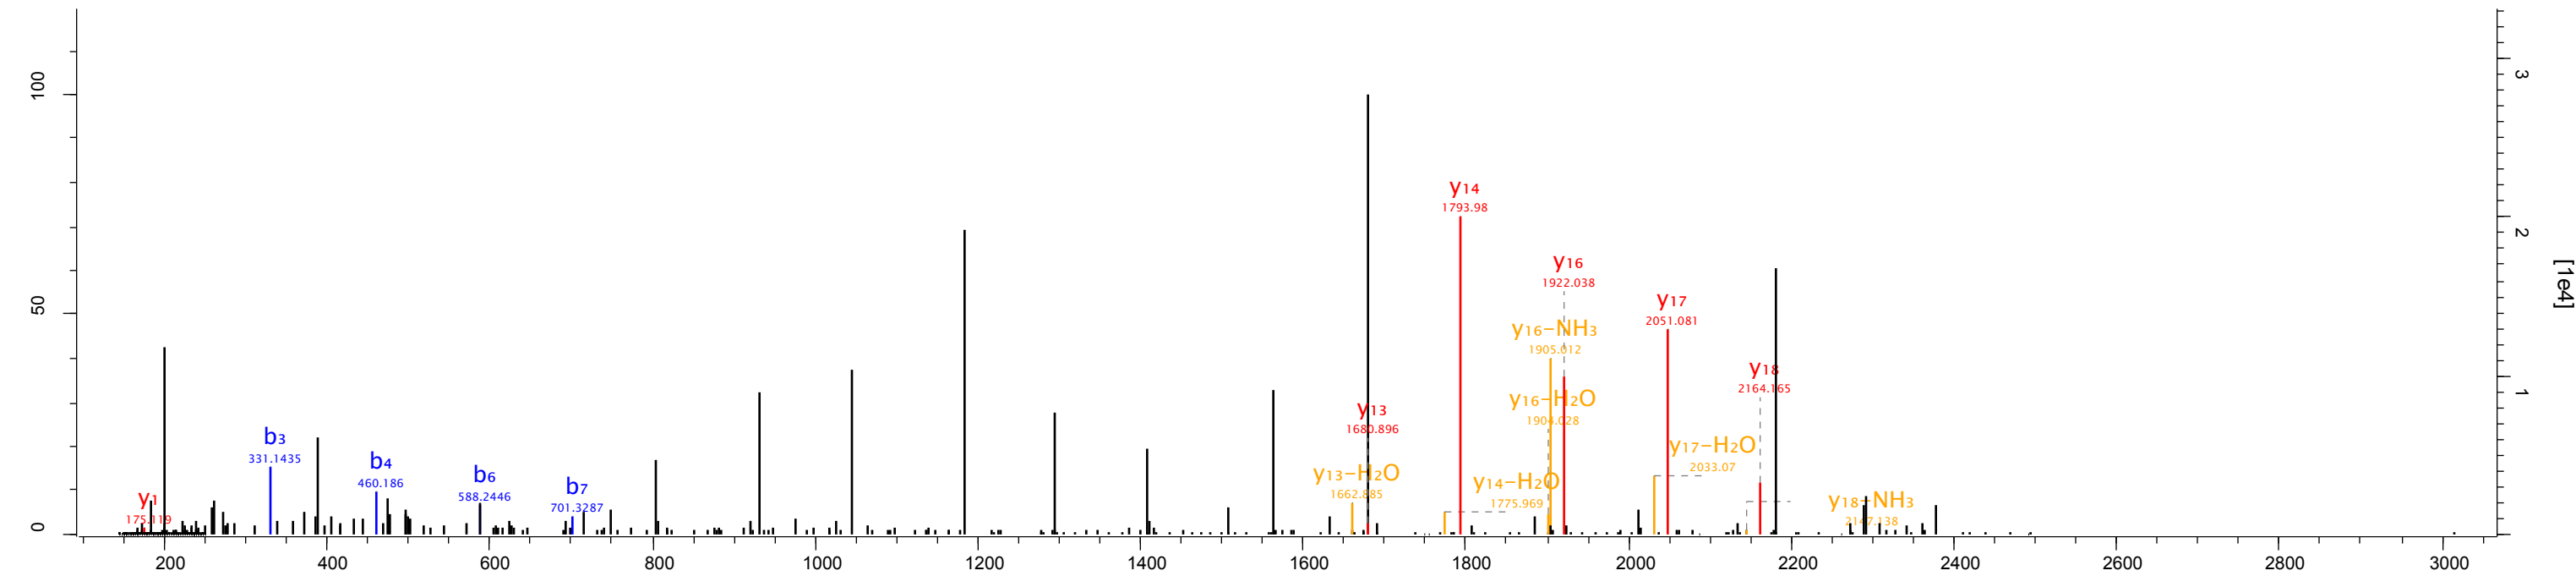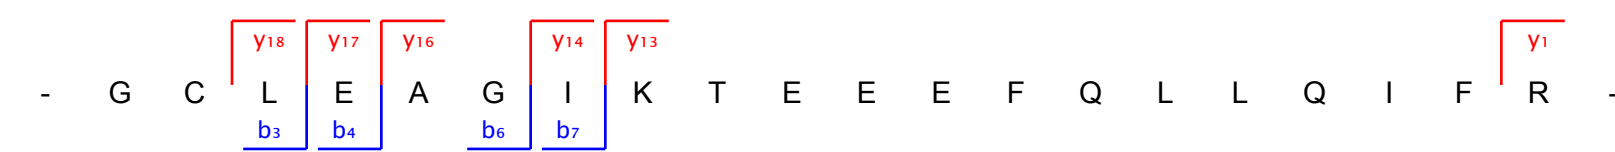

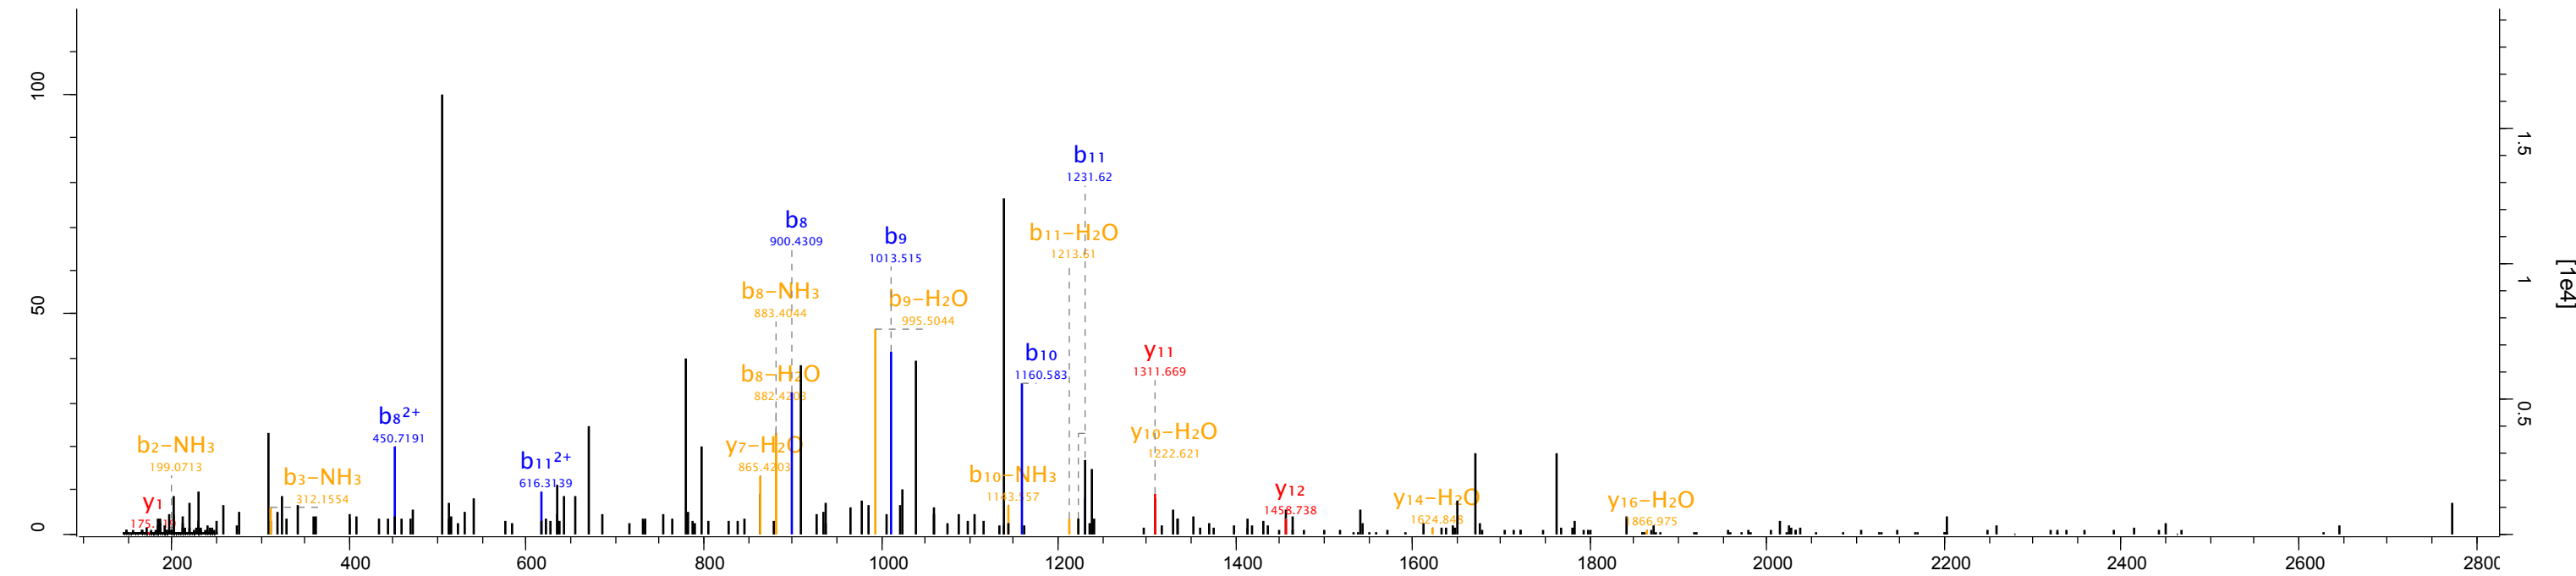

- S Q L E E L E A L F A K T Q Y P D V Y A R -

Fragmentation mapping:

- b8: A
- b9: L
- b10: F
- b11: A
- y12: F
- y11: A
- y1: R

Raw file 20150307\_MEF1\_Top\_opt\_E1\_01\_1677 Scan 38213 Method TOF; CID Score 39.9 m/z 646.97 Gene names Icmt

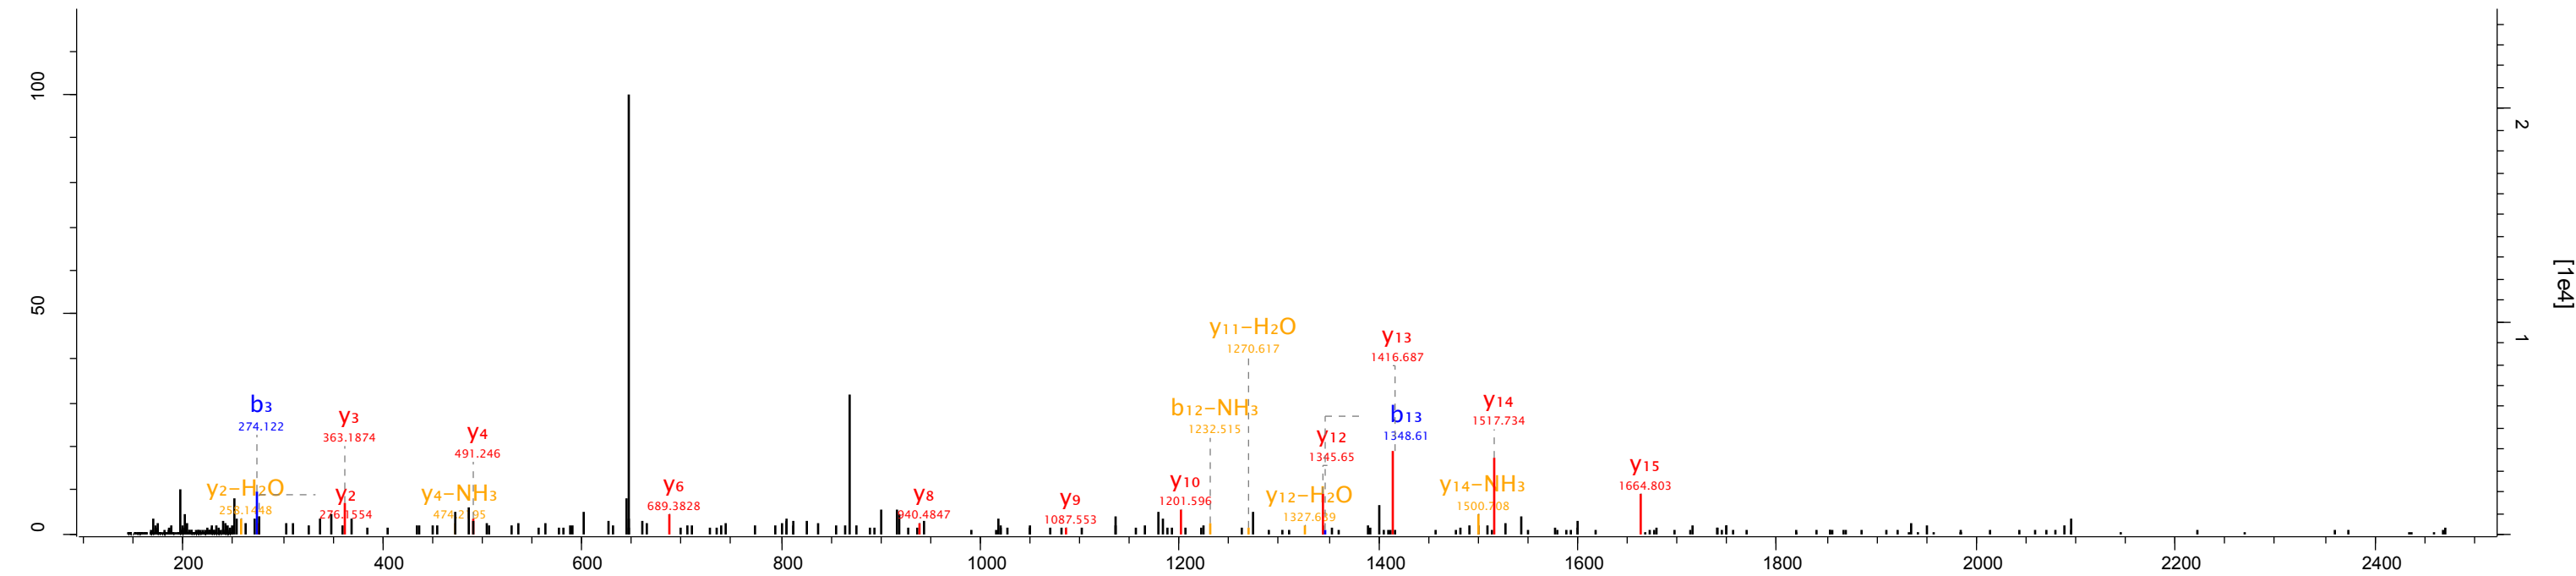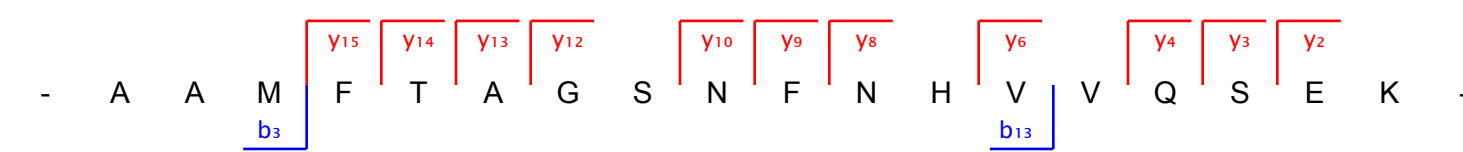

Raw file 20150307\_MEF1\_Top\_opt\_E1\_01\_1677 Scan 42047 Method TOF; CID Score 73.39 m/z 510.6 Gene names Mrpl57

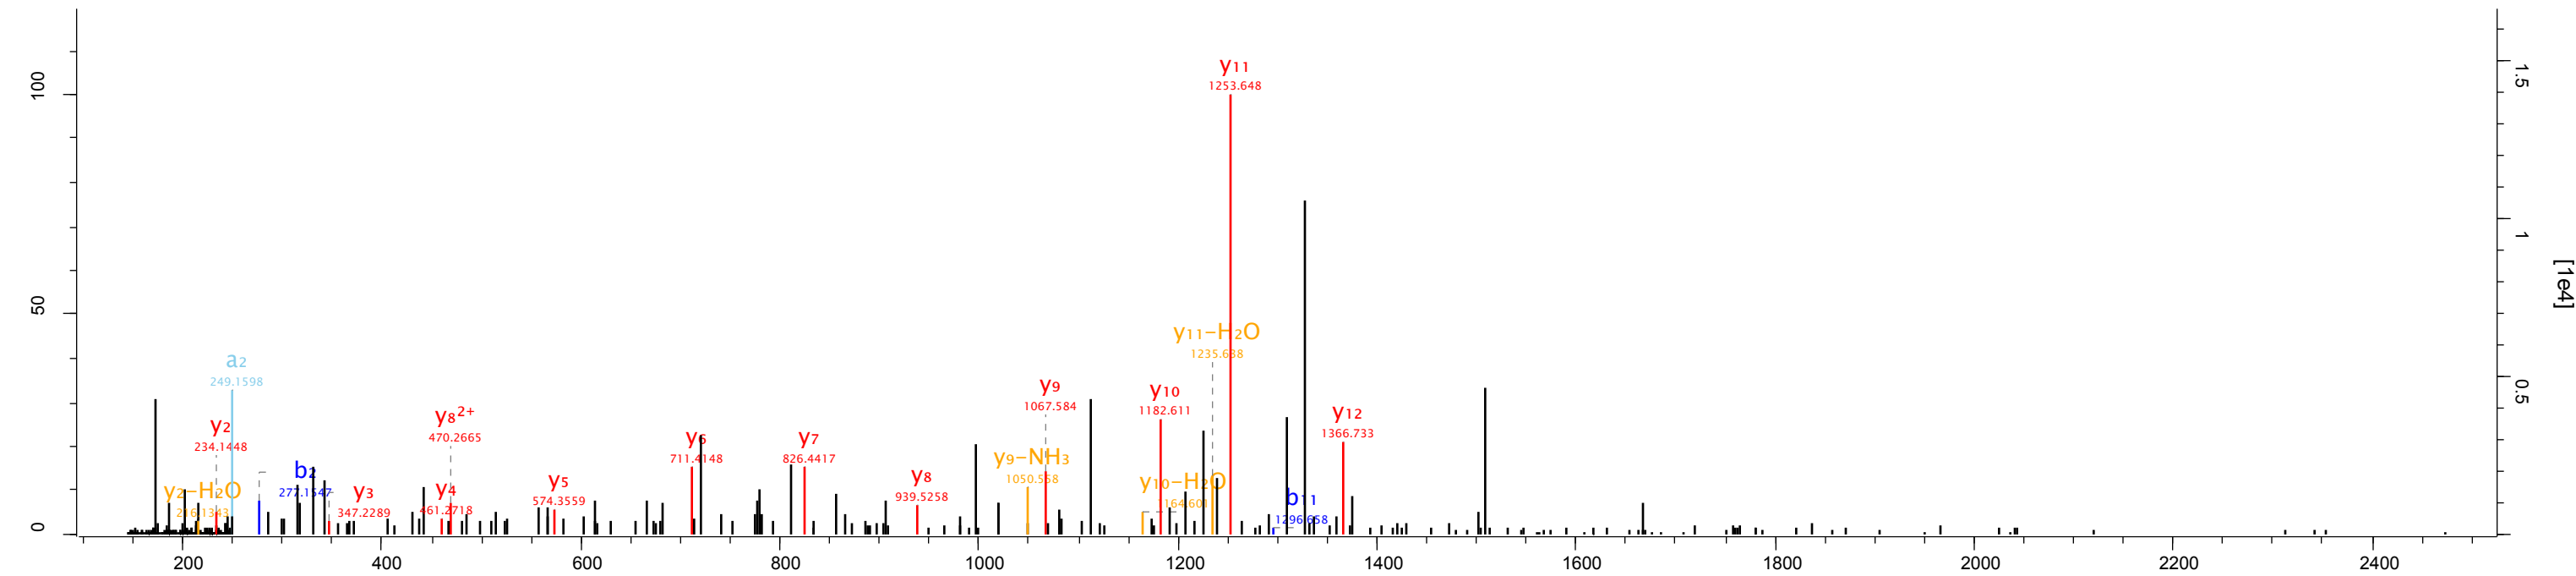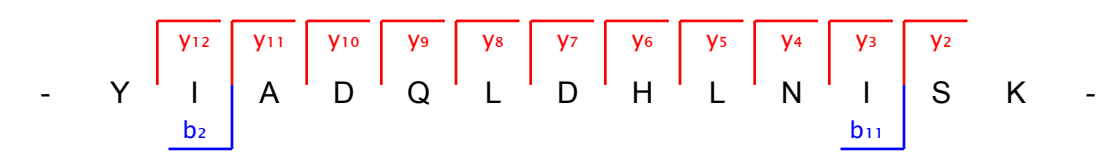

Raw file  
20150307\_MEF1\_Top\_opt\_E1\_01\_1677

Scan 45288 Method TOF; CID Score 93.23 m/z 524.27 Gene names Ripk2

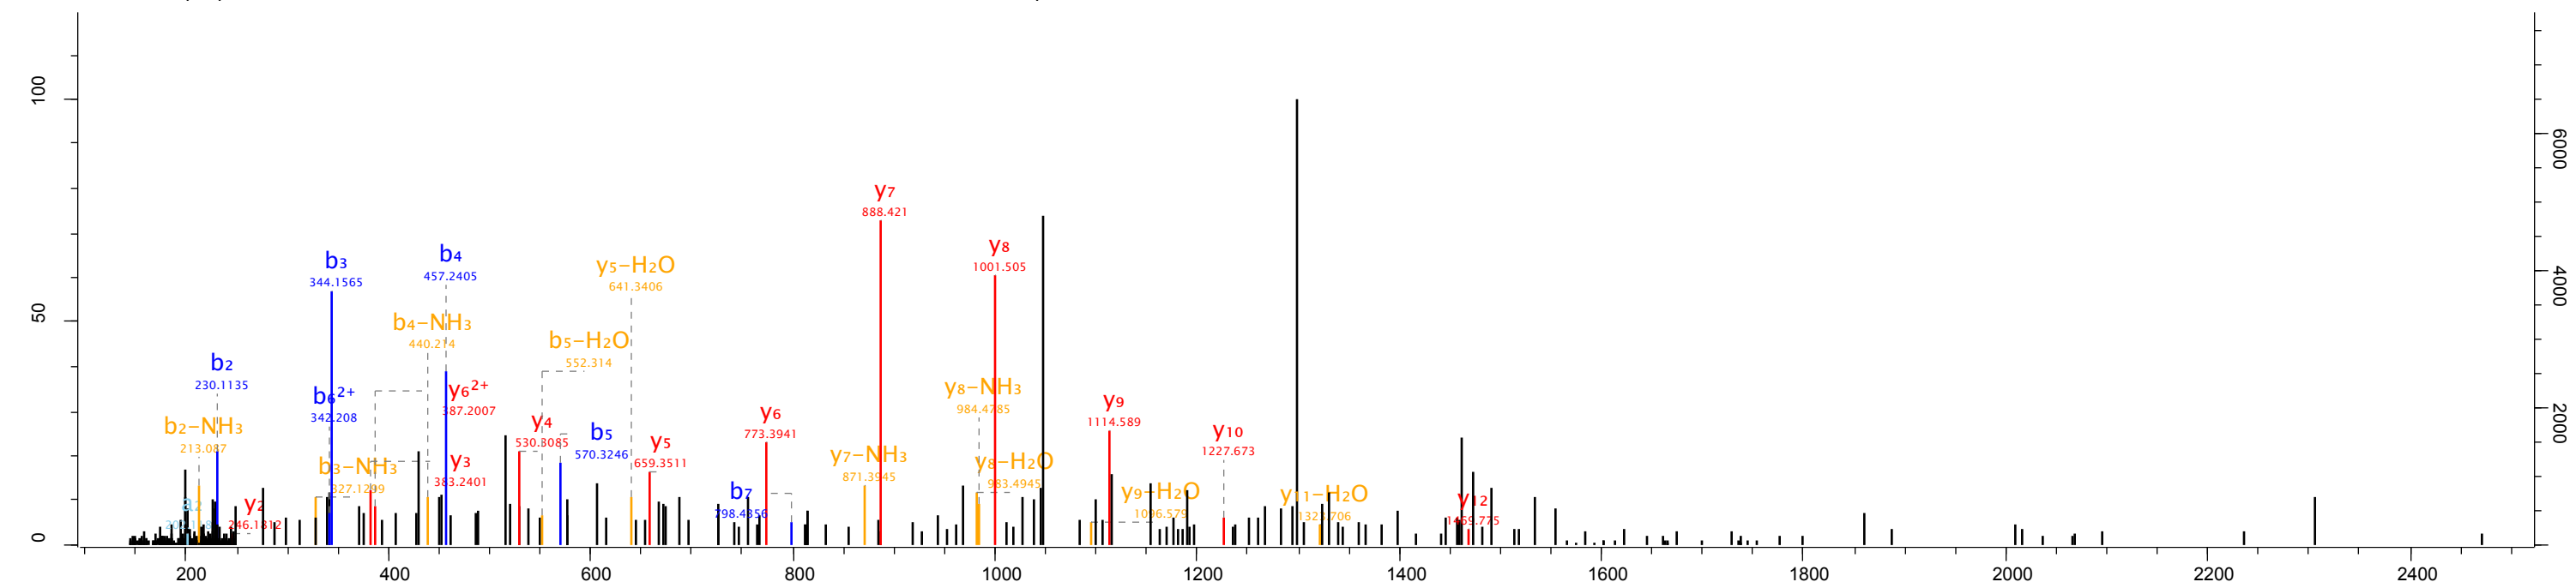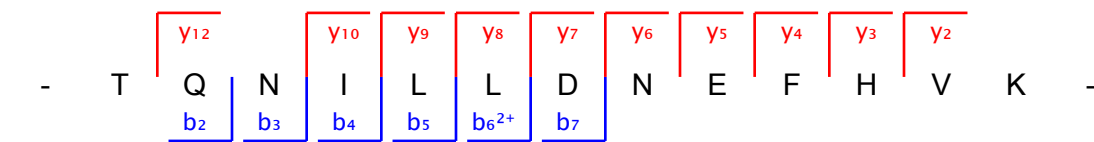

Raw file 20150307\_MEF1\_Top\_opt\_E1\_01\_1677 Scan 51804 Method TOF; CID Score 59.71 m/z 909.45 Gene names Tsr3

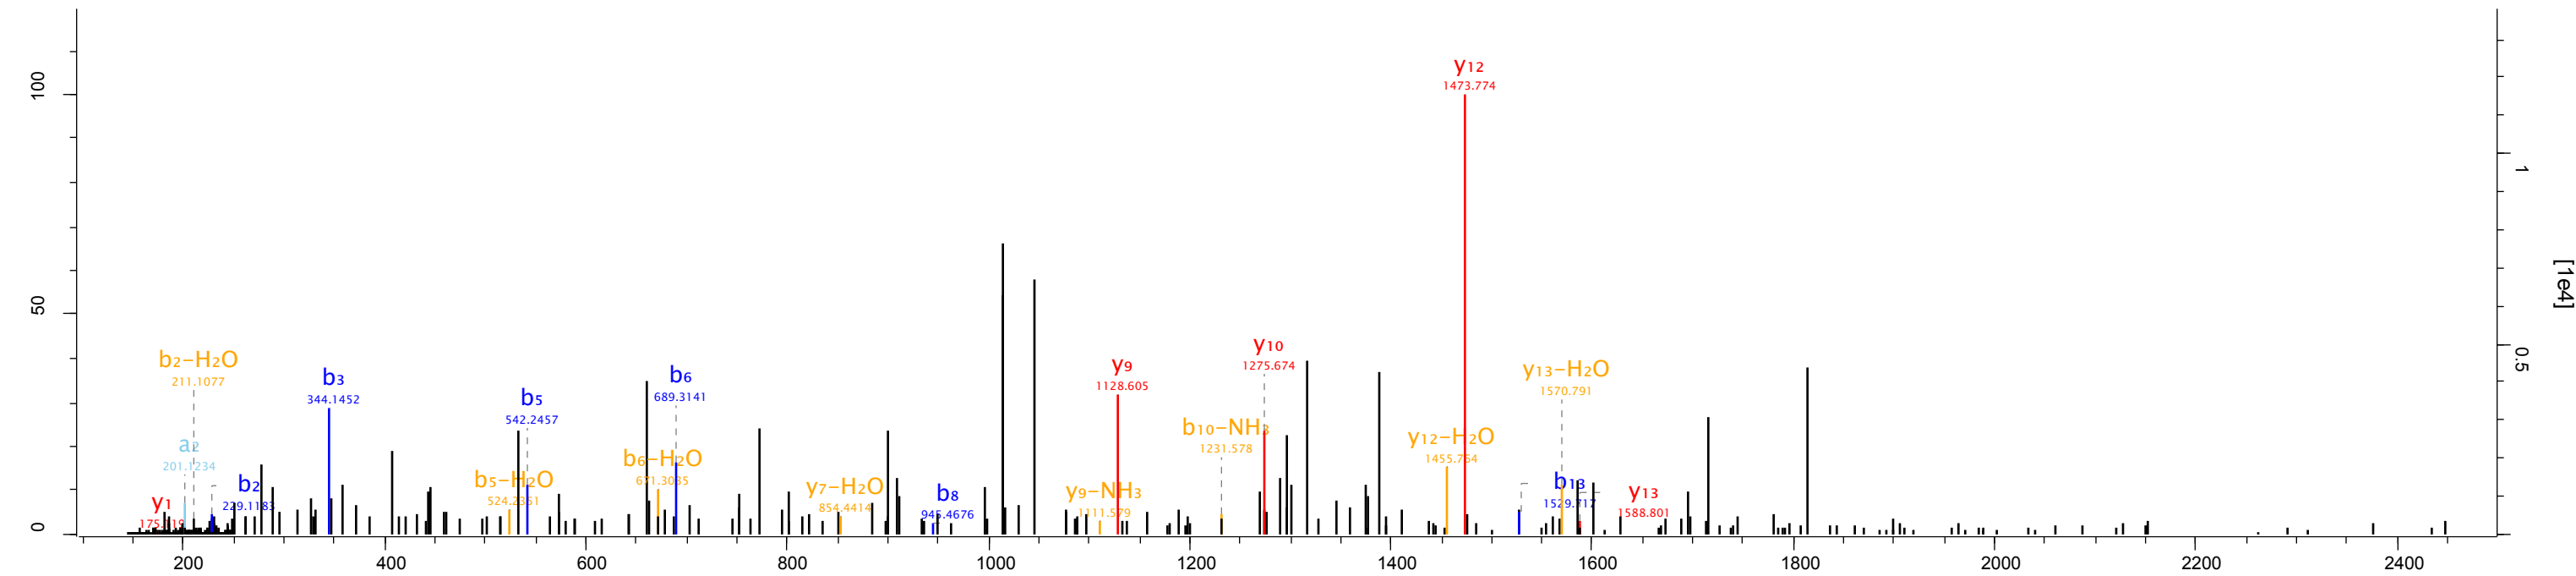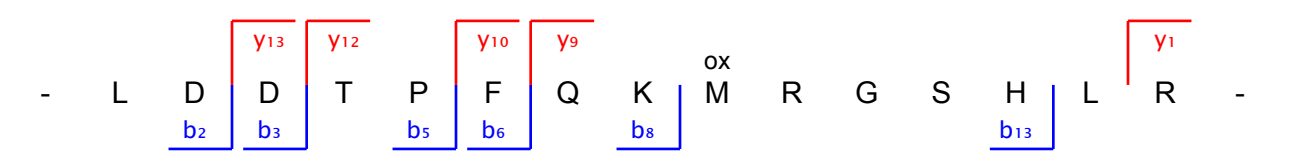

Raw file 20150307\_MEF1\_Top\_opt\_E1\_01\_1677 Scan 57749 Method TOF; CID Score 123.03 m/z 874.44 Gene names Tmem256

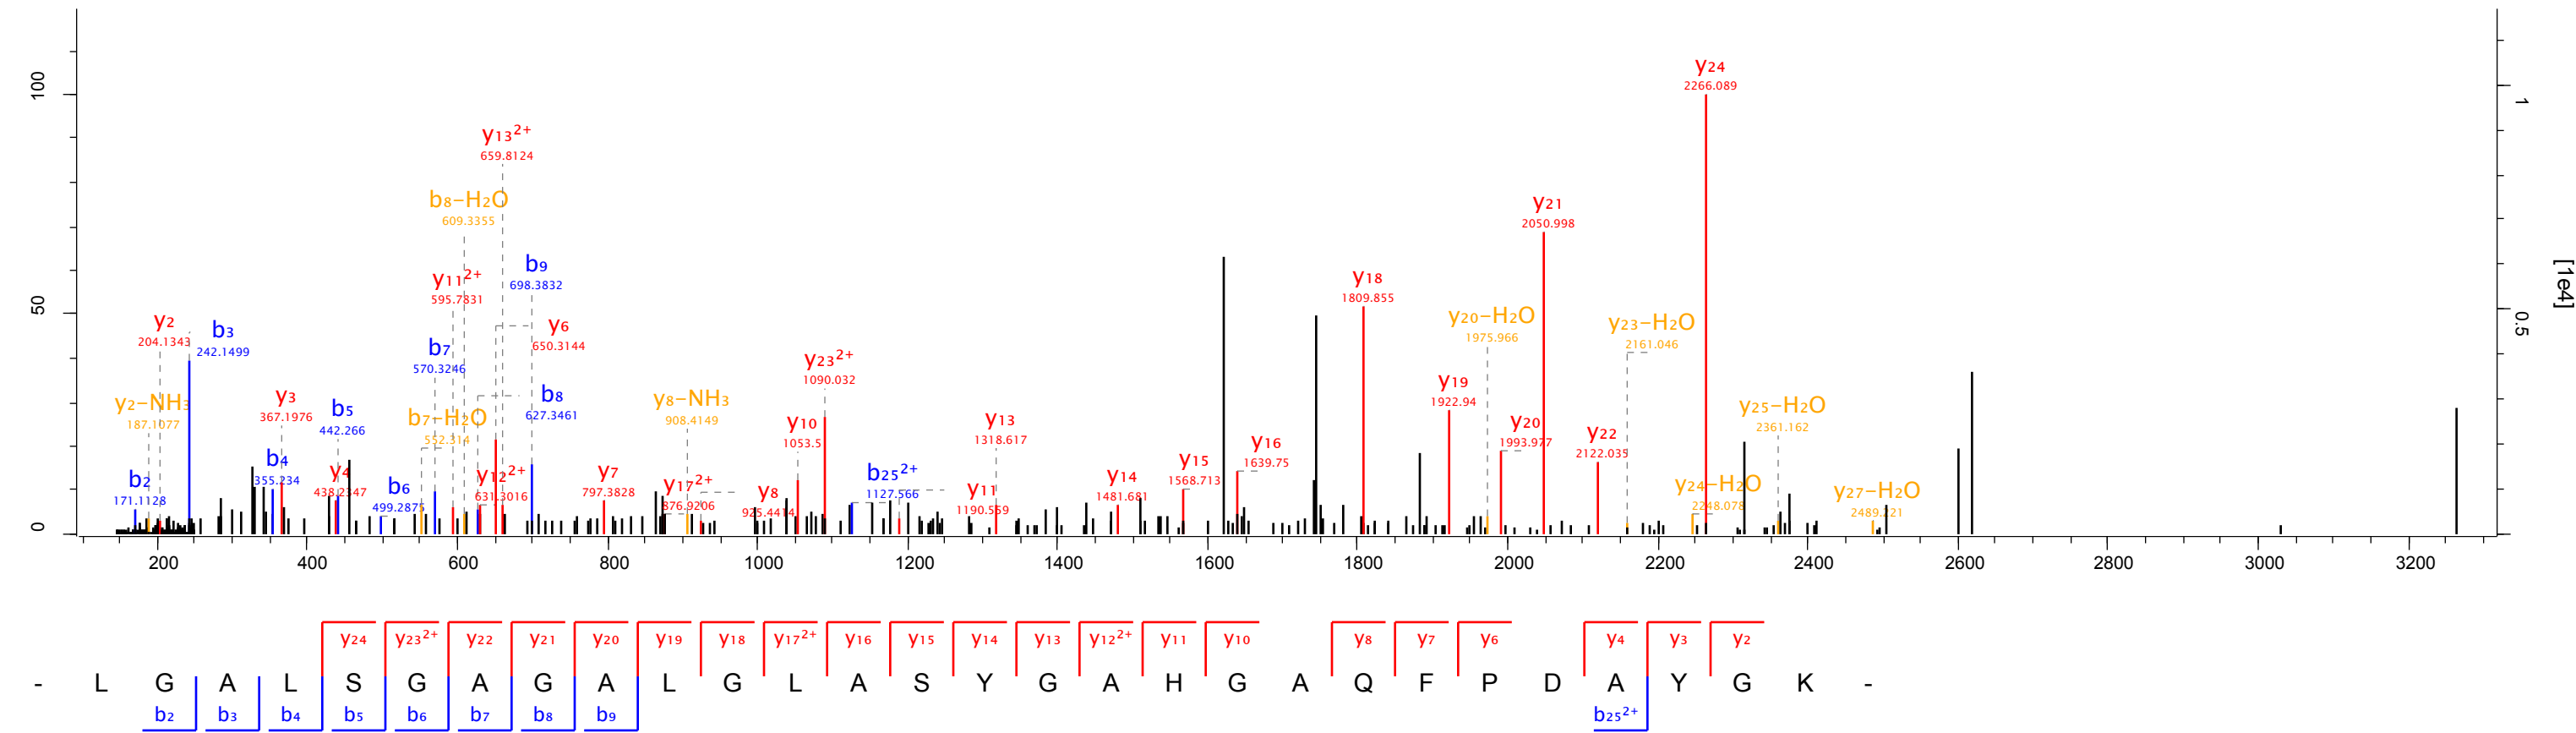



Raw file  
20150307\_MEF1\_Top\_opt\_E1\_01\_1677

Scan 60484 Method TOF; CID Score 41.26 m/z 717.38 Gene names 0610031J06Rik

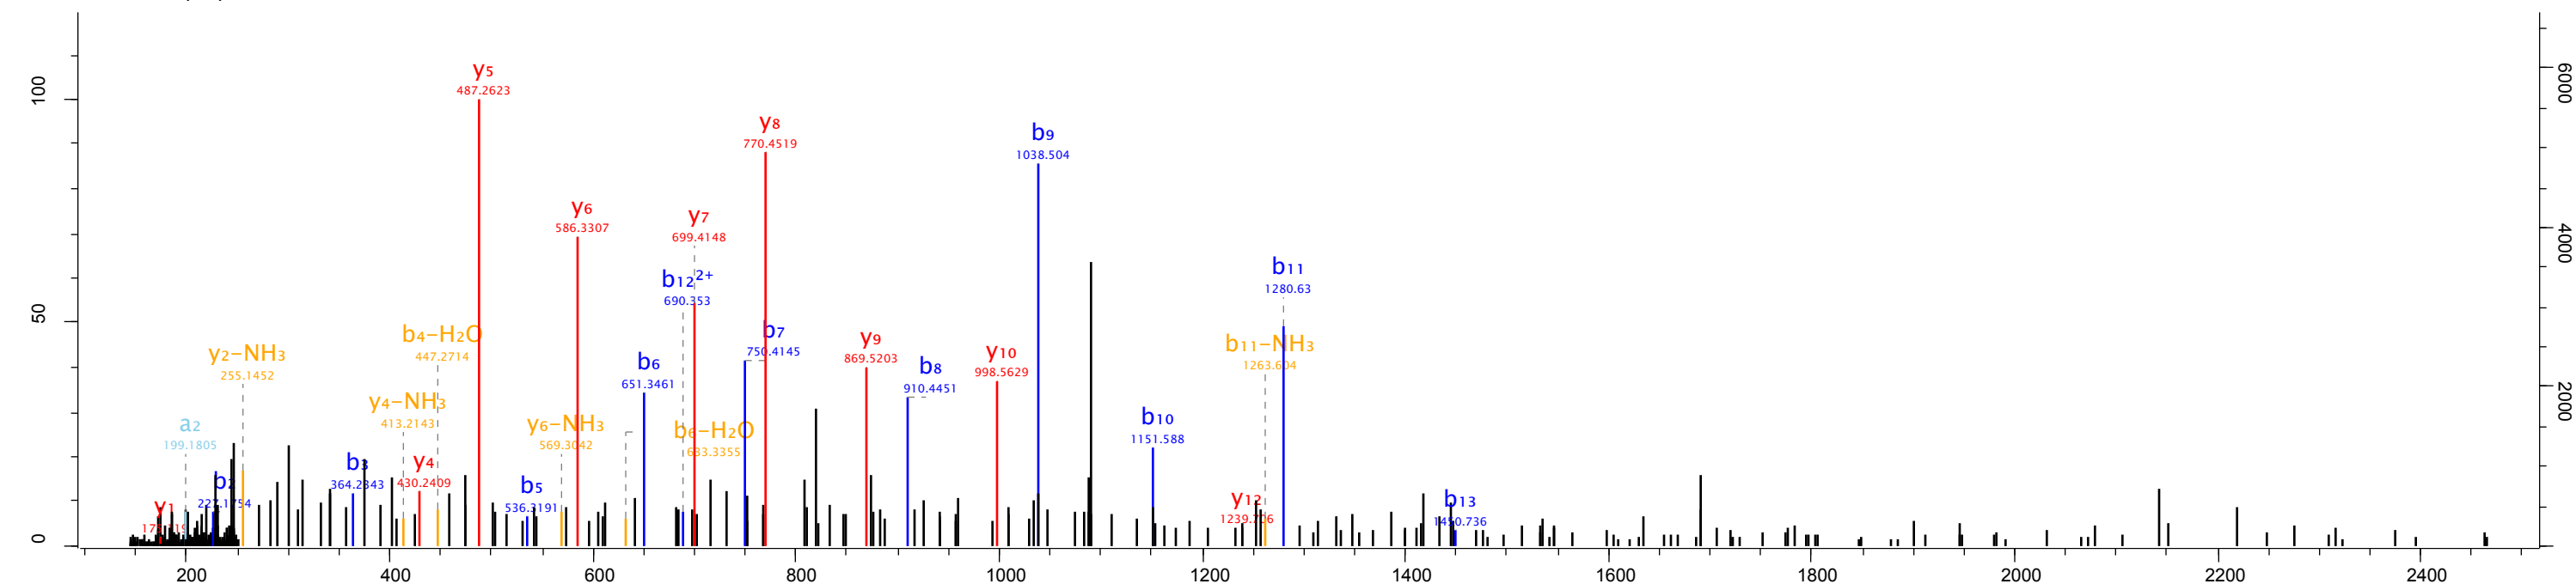

- L L H T A D V C Q L E V A L V G A S P R -

Fragmentation mapping (b and y ions):

- b2: L-L
- b3: L-H
- b5: A-D
- b6: D-V
- b7: V-C
- b8: C-Q
- b9: Q-L
- b10: L-E
- b11: E-V
- b12<sup>2+</sup>: V-A
- b13: A-L
- y1: R
- y4: A
- y5: G
- y6: V
- y7: L
- y8: A
- y9: V
- y10: E
- y12: P

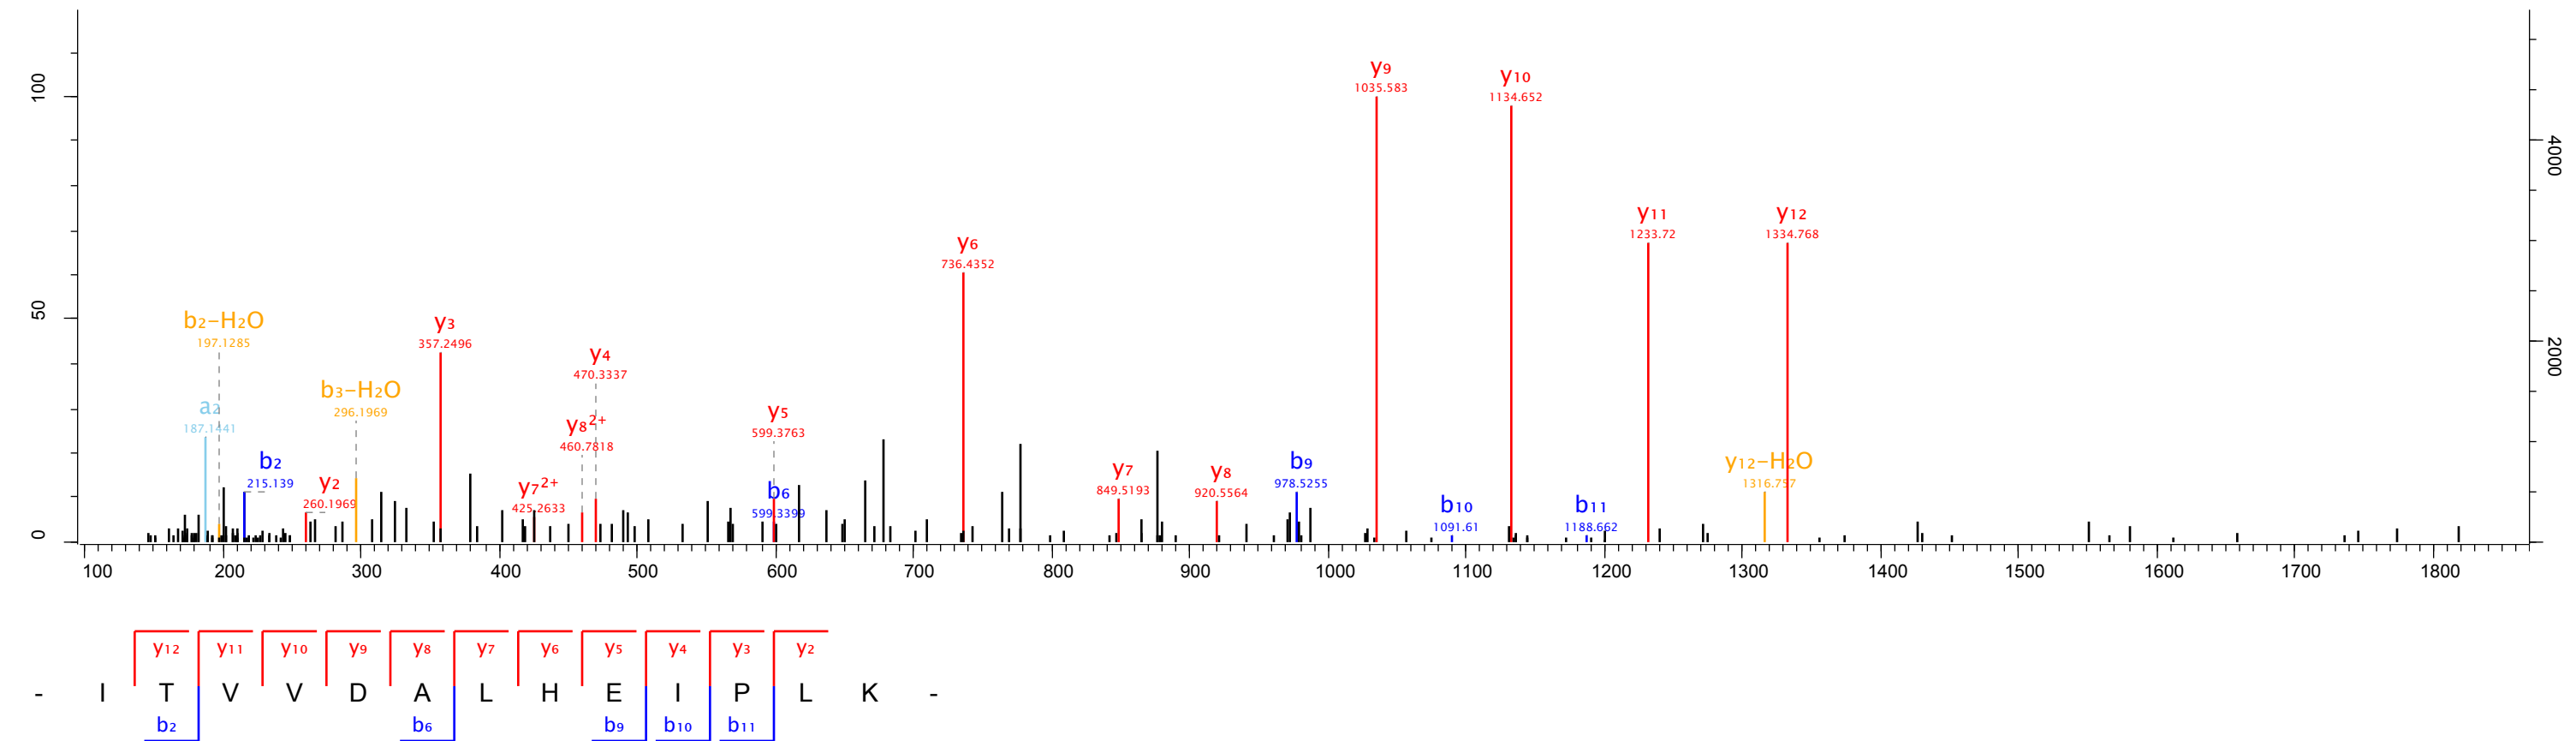

Raw file 20150307\_MEF1\_Top\_opt\_E1\_01\_1677 Scan 65338 Method TOF; CID Score 84.89 m/z 960.45 Gene names Aebp1

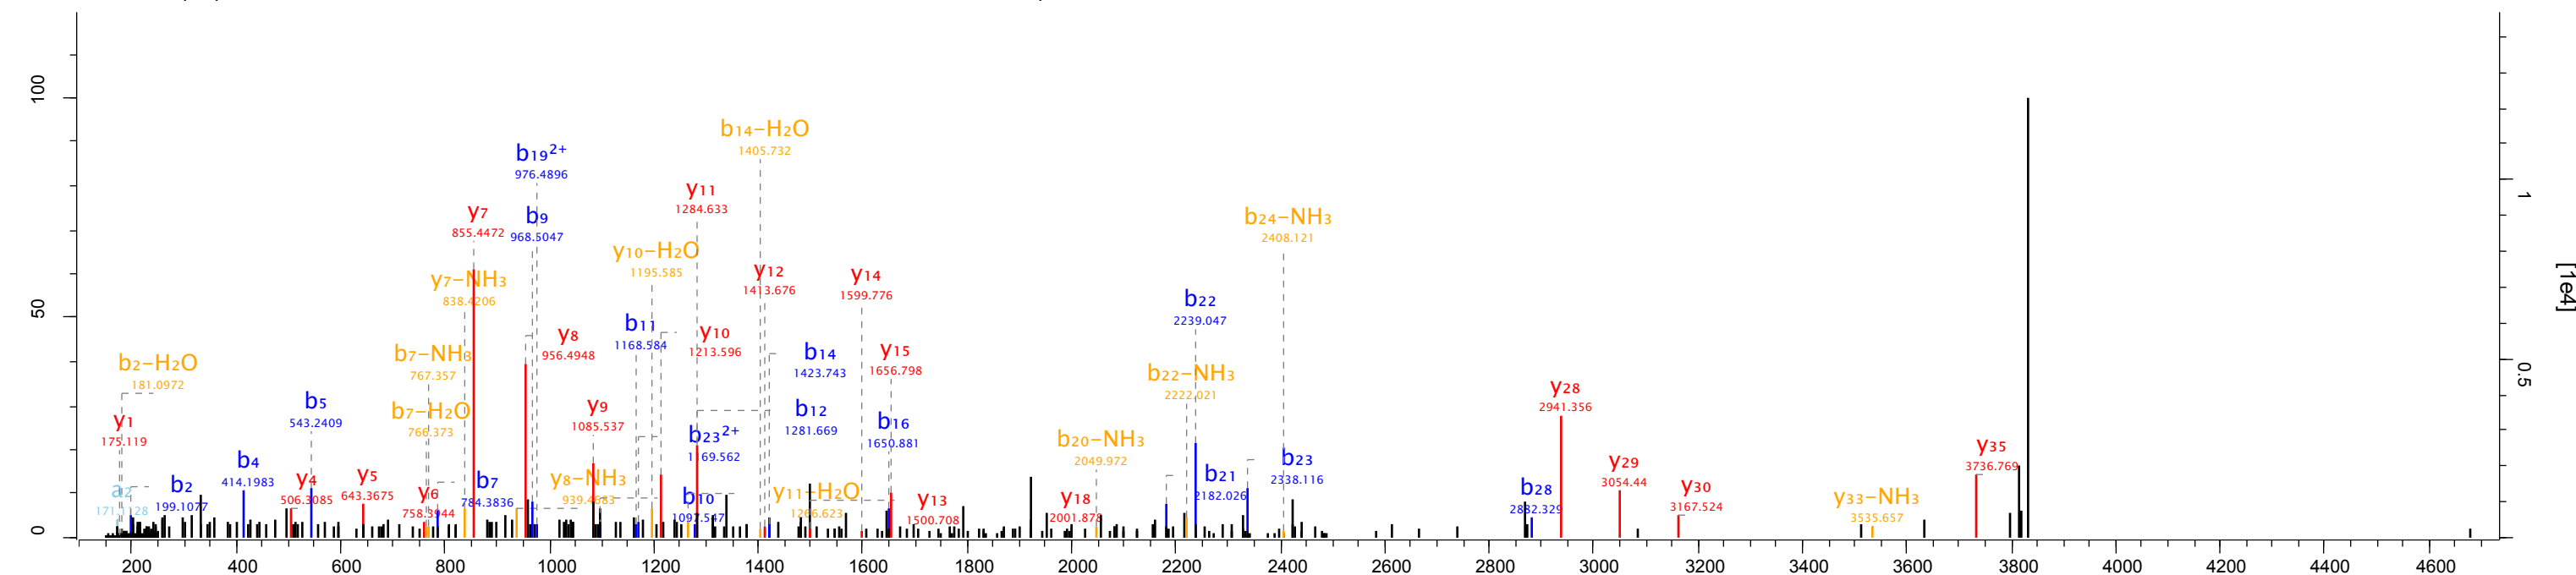

- T P S Q E Q L L A E A L A A A R G E D D D G V S E A Q E T P D H A I F R -

Fragmentation mapping: b<sub>2</sub> (P), b<sub>4</sub> (Q), b<sub>5</sub> (E), b<sub>7</sub> (L), b<sub>9</sub> (A), b<sub>10</sub> (E), b<sub>11</sub> (A), b<sub>12</sub> (L), b<sub>14</sub> (A), b<sub>16</sub> (R), b<sub>19</sub><sup>2+</sup> (D), b<sub>21</sub> (D), b<sub>22</sub> (G), b<sub>23</sub> (V), b<sub>28</sub> (E), y<sub>1</sub> (R), y<sub>4</sub> (Q), y<sub>5</sub> (D), y<sub>6</sub> (H), y<sub>7</sub> (P), y<sub>8</sub> (T), y<sub>9</sub> (E), y<sub>10</sub> (A), y<sub>11</sub> (S), y<sub>12</sub> (E), y<sub>13</sub> (V), y<sub>14</sub> (G), y<sub>15</sub> (D), y<sub>18</sub> (E), y<sub>28</sub> (A), y<sub>29</sub> (L), y<sub>30</sub> (L), y<sub>35</sub> (P).

Raw file  
20150307\_MEF1\_Top\_opt\_E1\_01\_1677

Scan 65612 Method TOF; CID Score 81.02 m/z 857.43 Gene names Rasa4

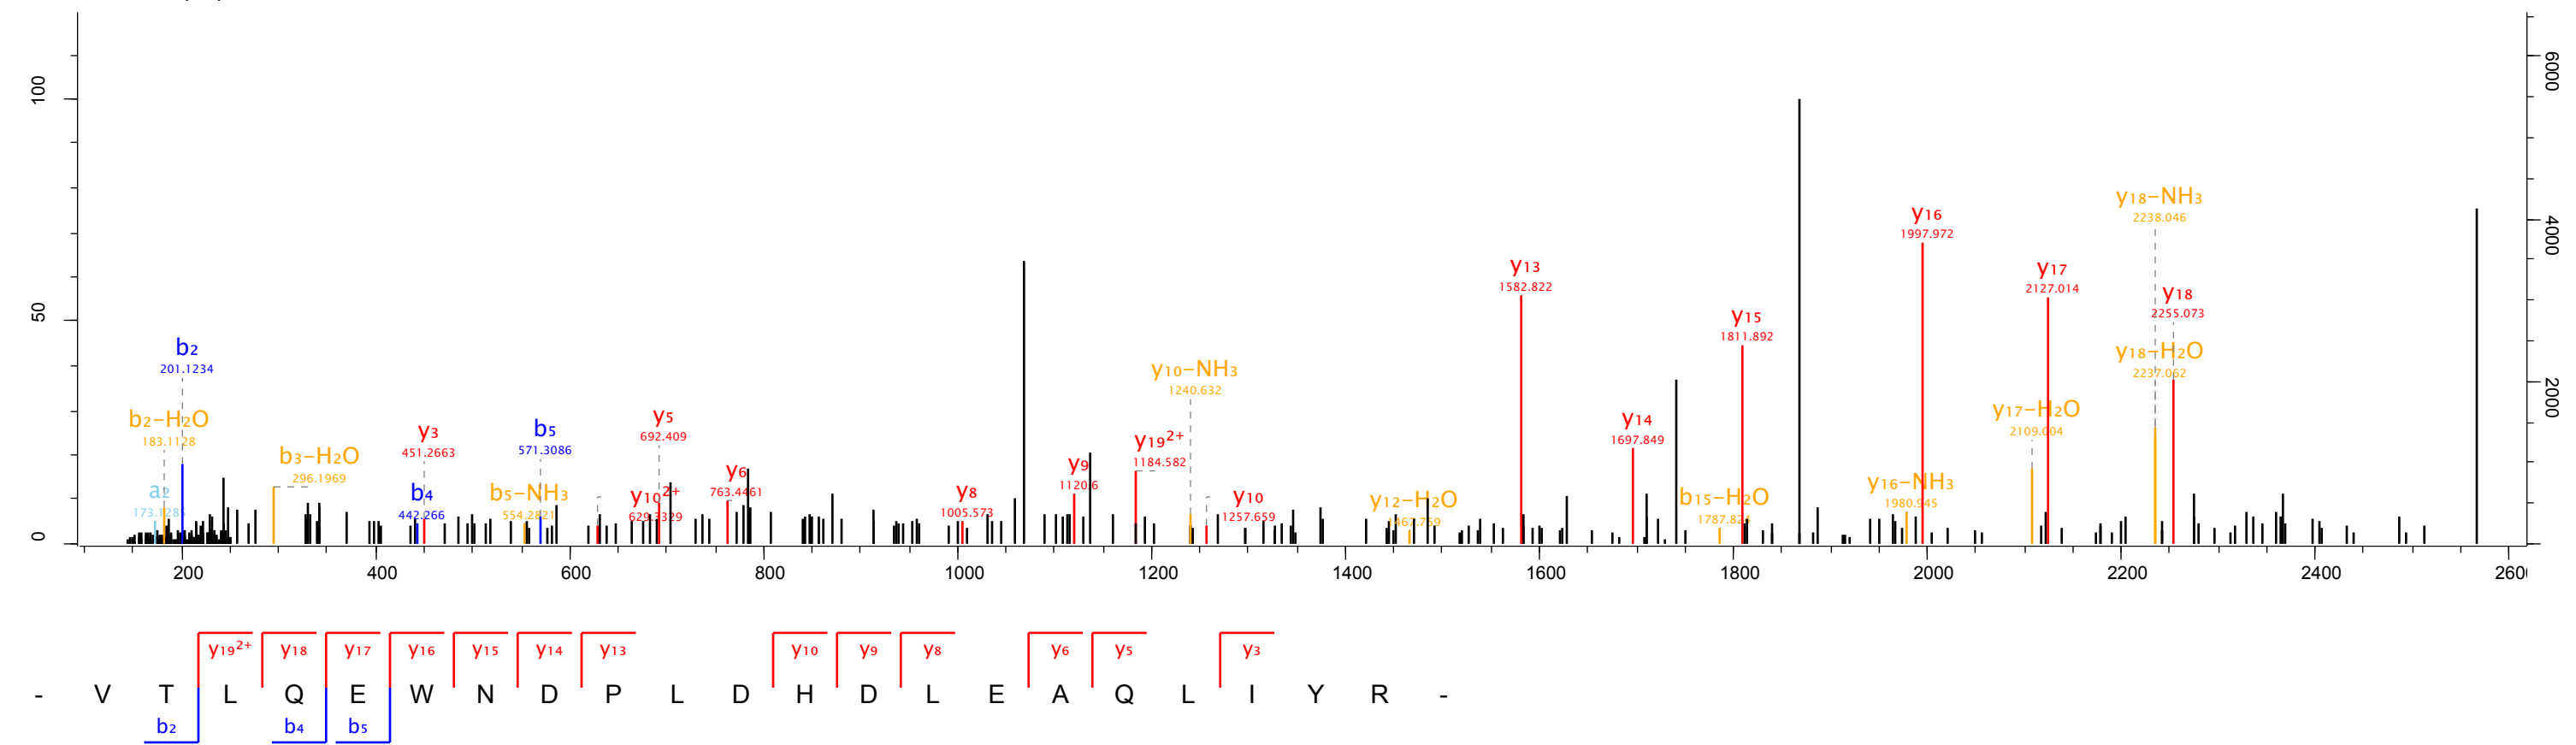

Raw file  
20150307\_MEF1\_Top\_opt\_E1\_01\_1677

Scan 66367 Method TOF; CID Score 88.6 m/z 631.87 Gene names Casp6

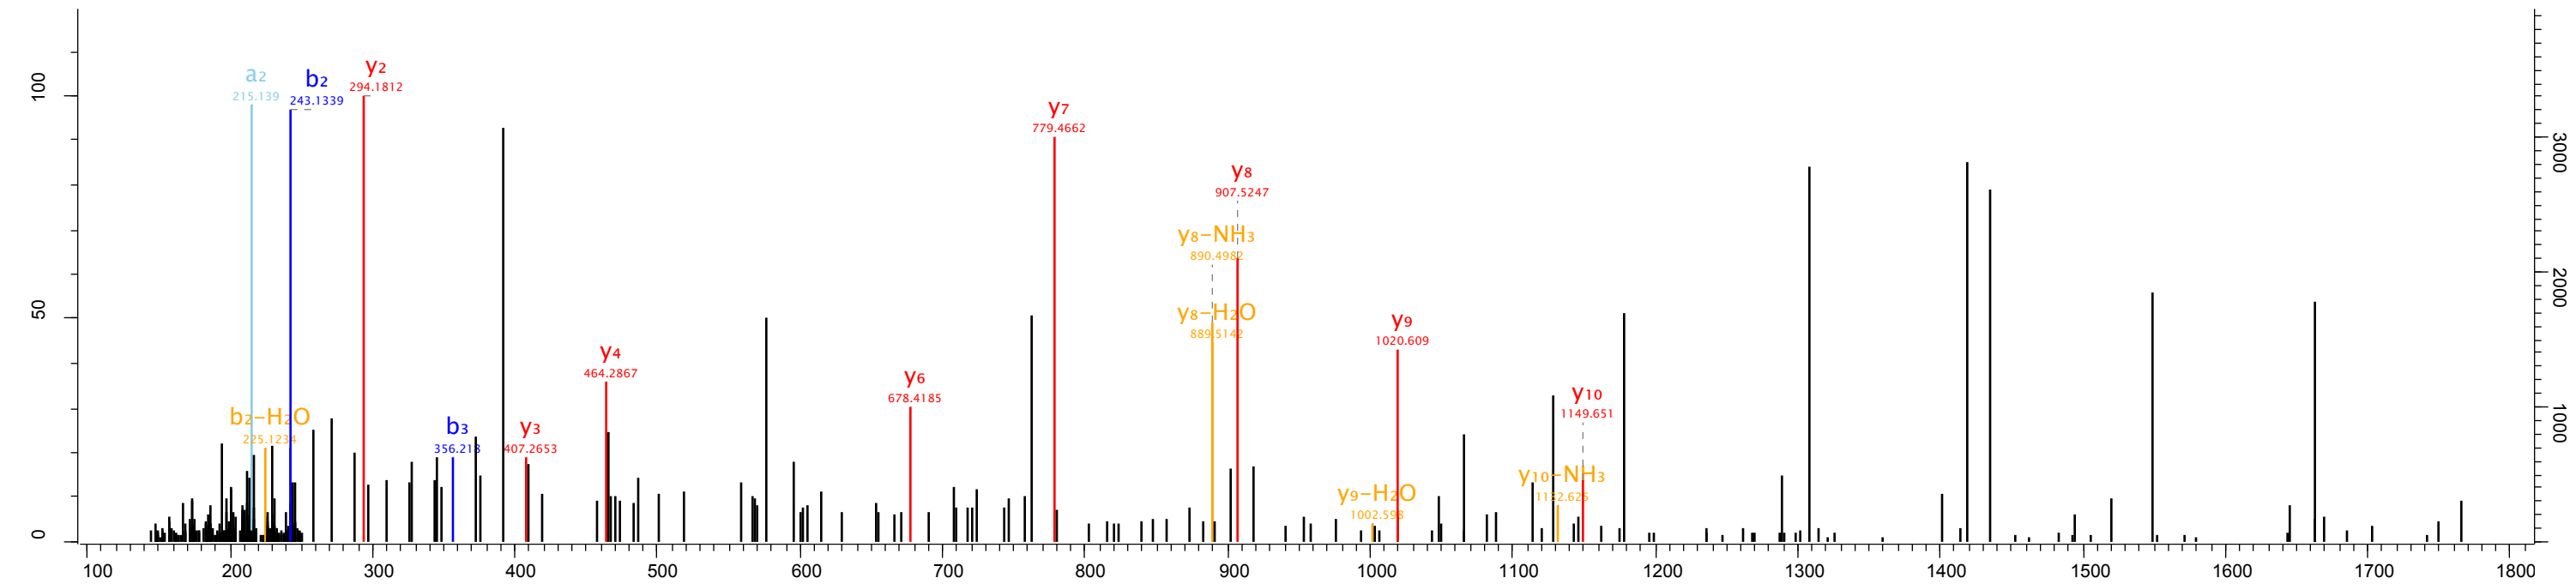

- I E I Q T L T G L F K -  
b<sub>2</sub> b<sub>3</sub> y<sub>10</sub> y<sub>9</sub> y<sub>8</sub> y<sub>7</sub> y<sub>6</sub> y<sub>4</sub> y<sub>3</sub> y<sub>2</sub>

Raw file  
20150307\_MEF1\_Top\_opt\_E1\_01\_1677

Scan 68185 Method TOF; CID Score 53.03 m/z 785.39 Gene names Tm9sf1

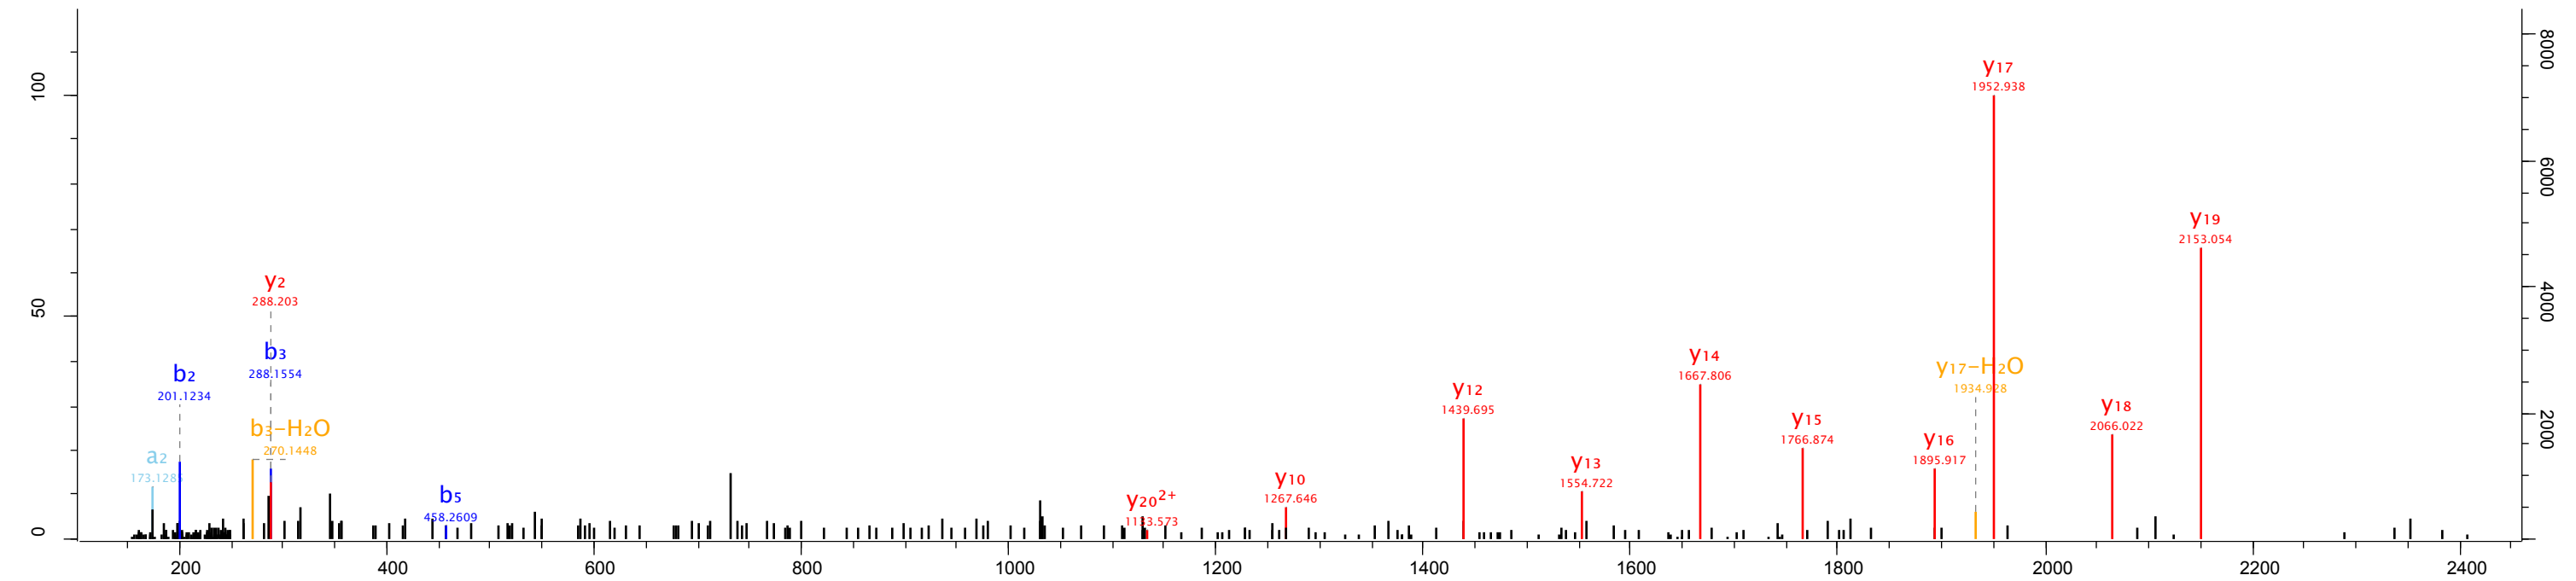

- S L S L G E V L D G D R M A E S L Y E I R -  
b2 b3 b5 y20<sup>2+</sup> y19 y18 y17 y16 y15 y14 y13 y12 y10 y2

Raw file 20150307\_MEF1\_Top\_opt\_E1\_01\_1684 Scan 8950 Method TOF; CID Score 71.61 m/z 364.51 Gene names Tm4sf1

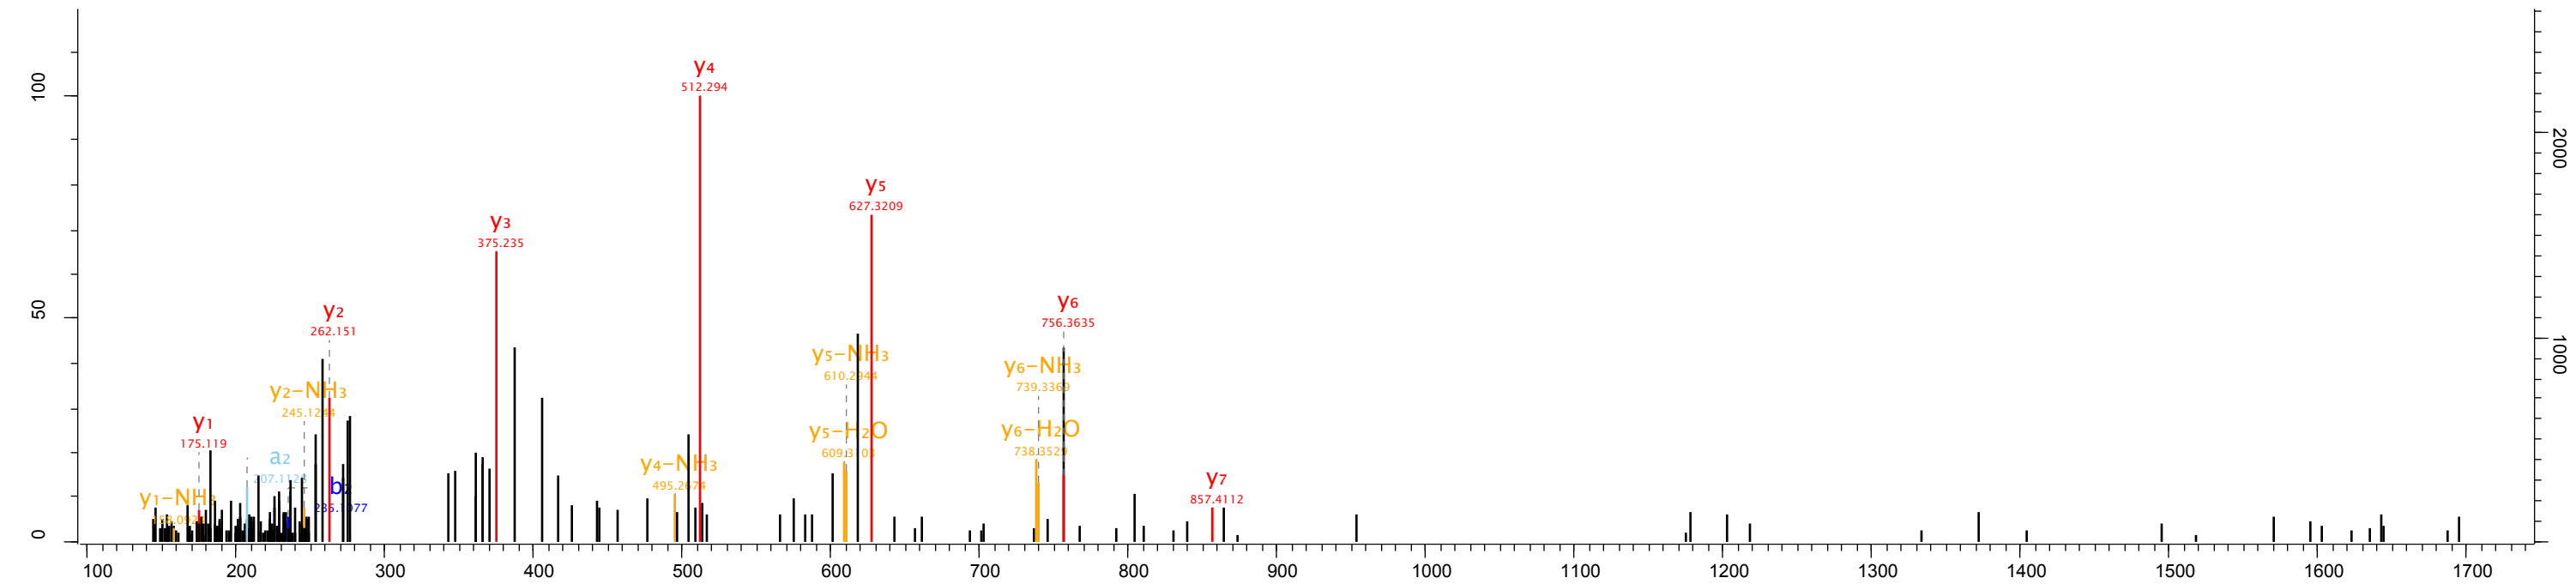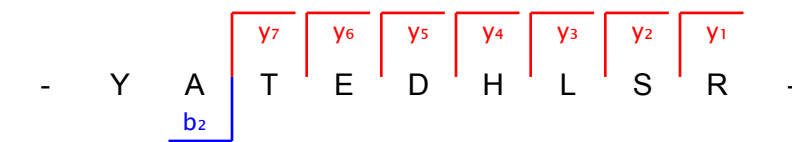

Raw file  
20150307\_MEF1\_Top\_opt\_E1\_01\_1684

Scan 21987 Method TOF; CID Score 60.26 m/z 461.23 Gene names Gsdma3

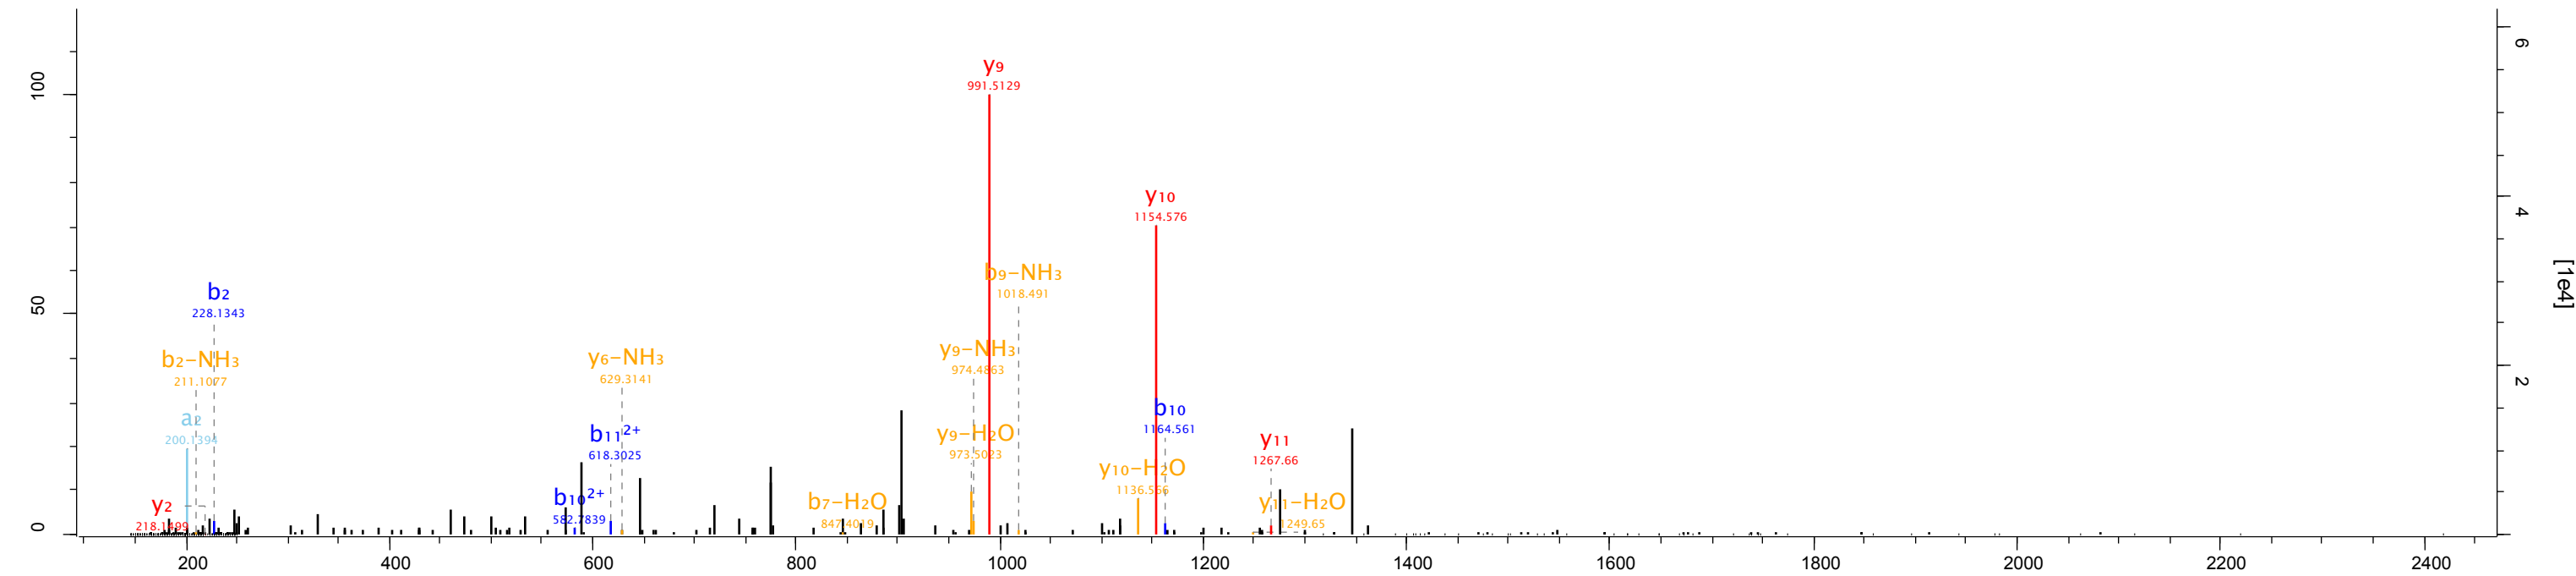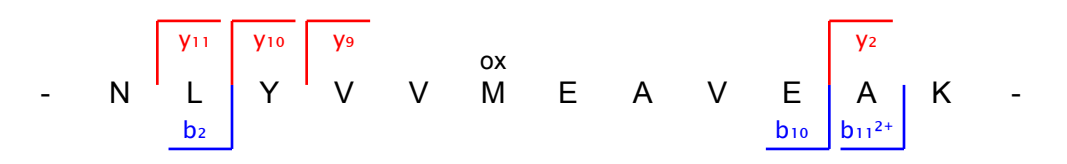



Raw file  
20150307\_MEF1\_Top\_opt\_E1\_01\_1684

Scan 47497 Method TOF; CID Score 100.04 m/z 880.99 Gene names Krtcap2

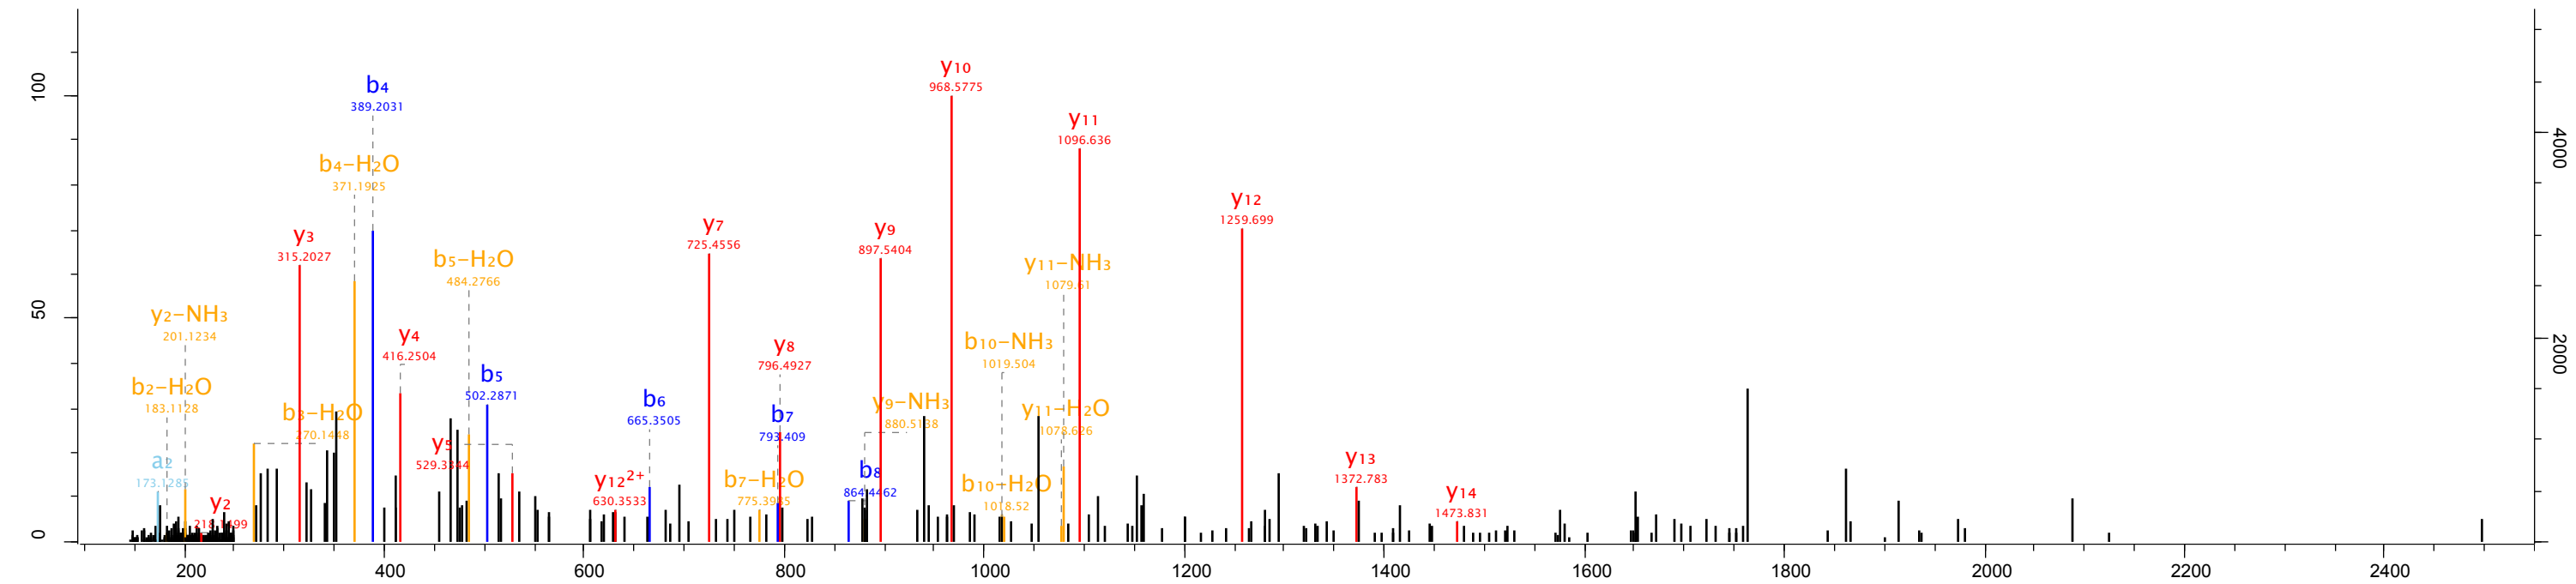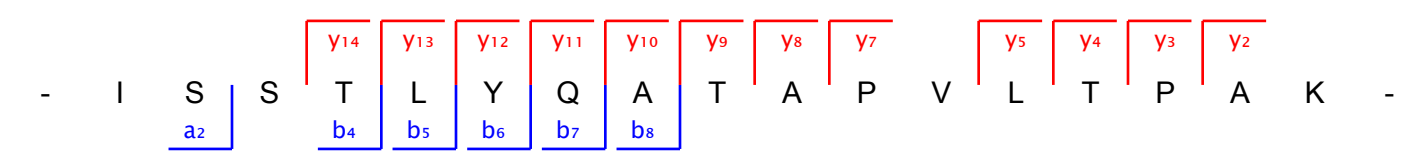

Raw file  
20150307\_MEF1\_Top\_opt\_E1\_01\_1684

| Scan  | Method   | Score | m/z    | Gene names |
|-------|----------|-------|--------|------------|
| 51804 | TOF; CID | 35.81 | 750.08 | Pcdh19     |

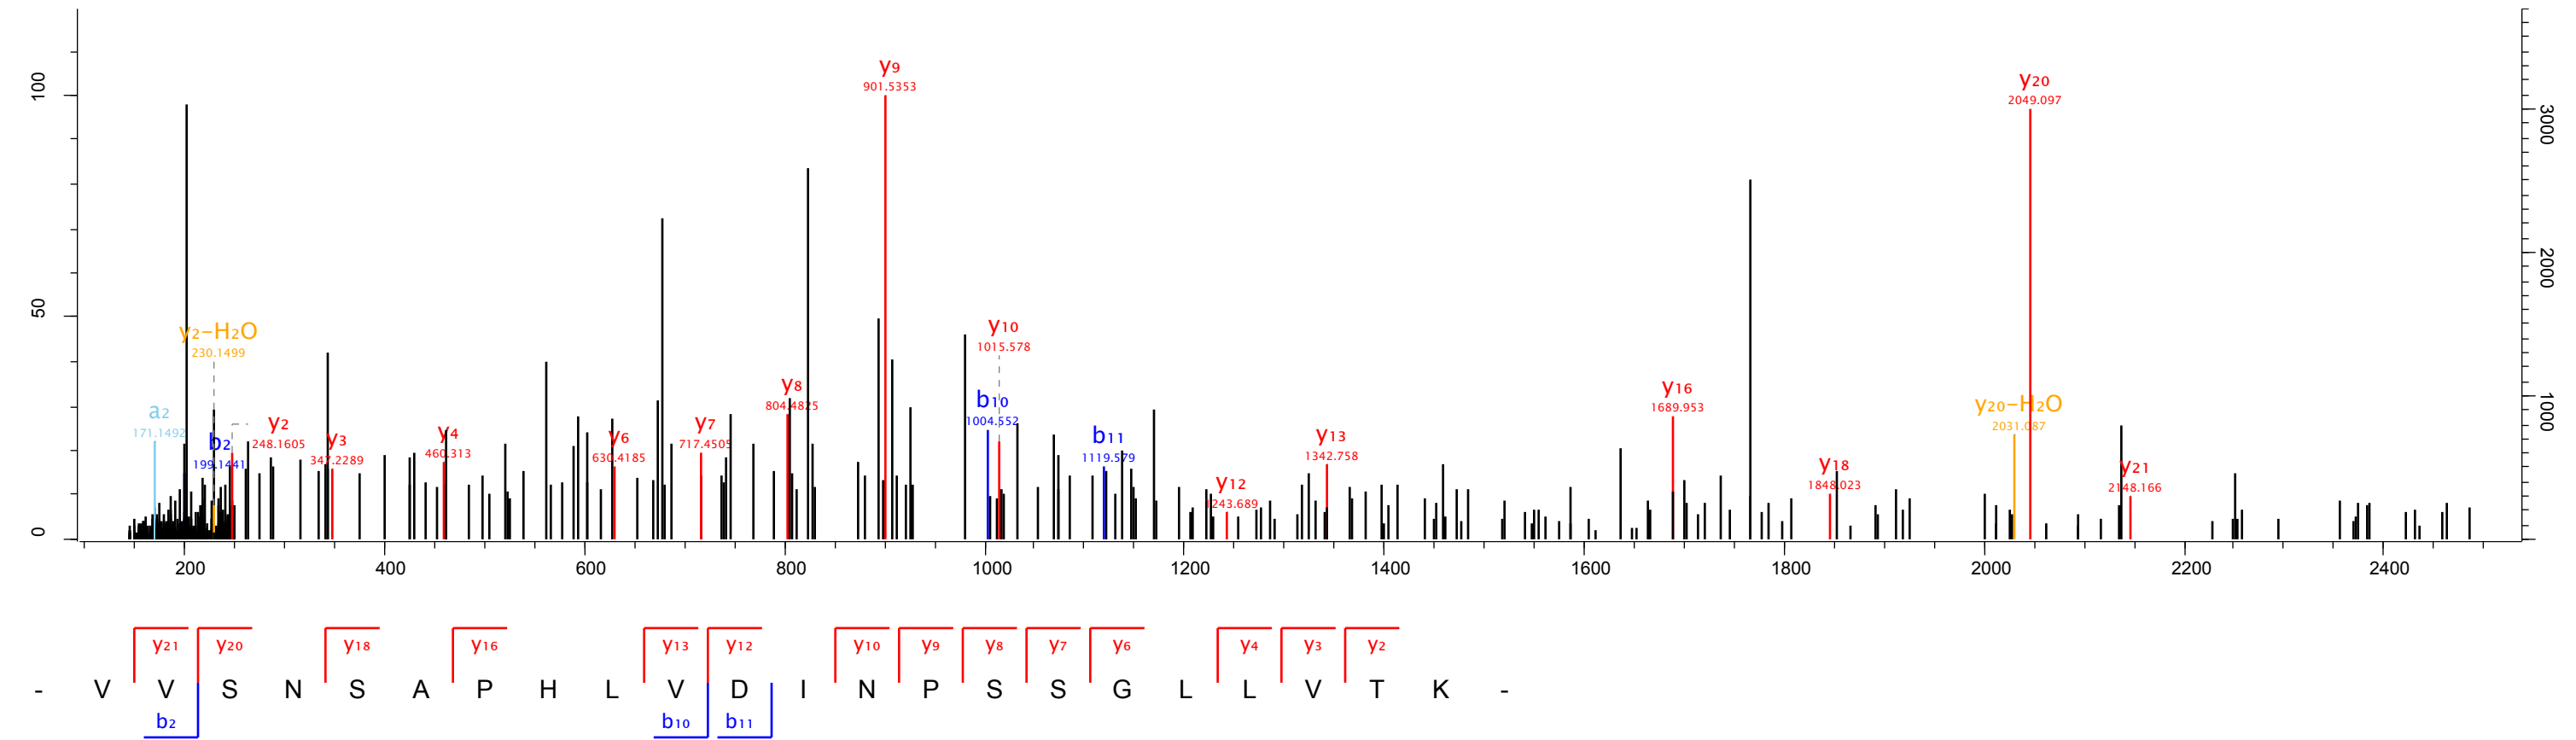

Raw file 20150307\_MEF1\_Top\_opt\_E1\_01\_1684 Scan 54948 Method TOF; CID Score 158.37 m/z 882.77 Gene names Mapk1ip1l

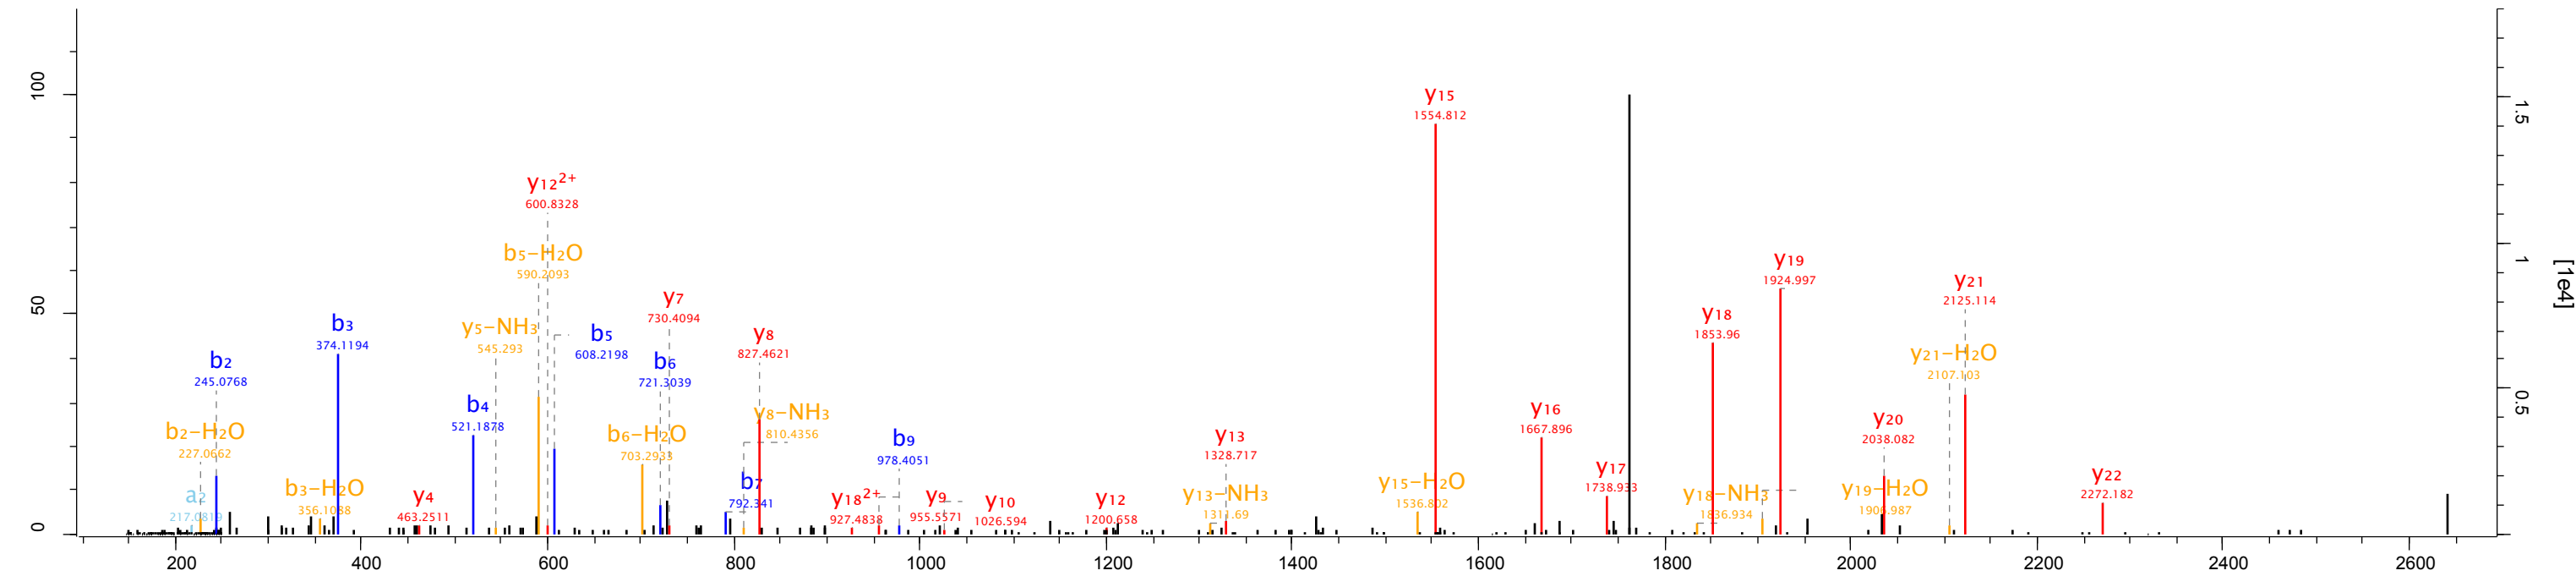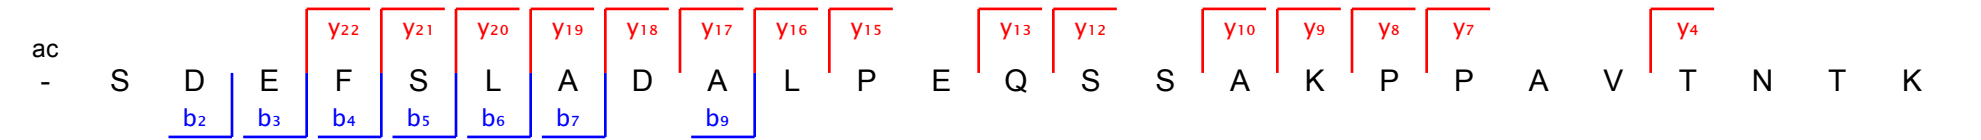

Raw file  
20150307\_MEF1\_Top\_opt\_E1\_01\_1684

Scan 62588 Method TOF; CID Score 52.01 m/z 815.4 Gene names Anapc16

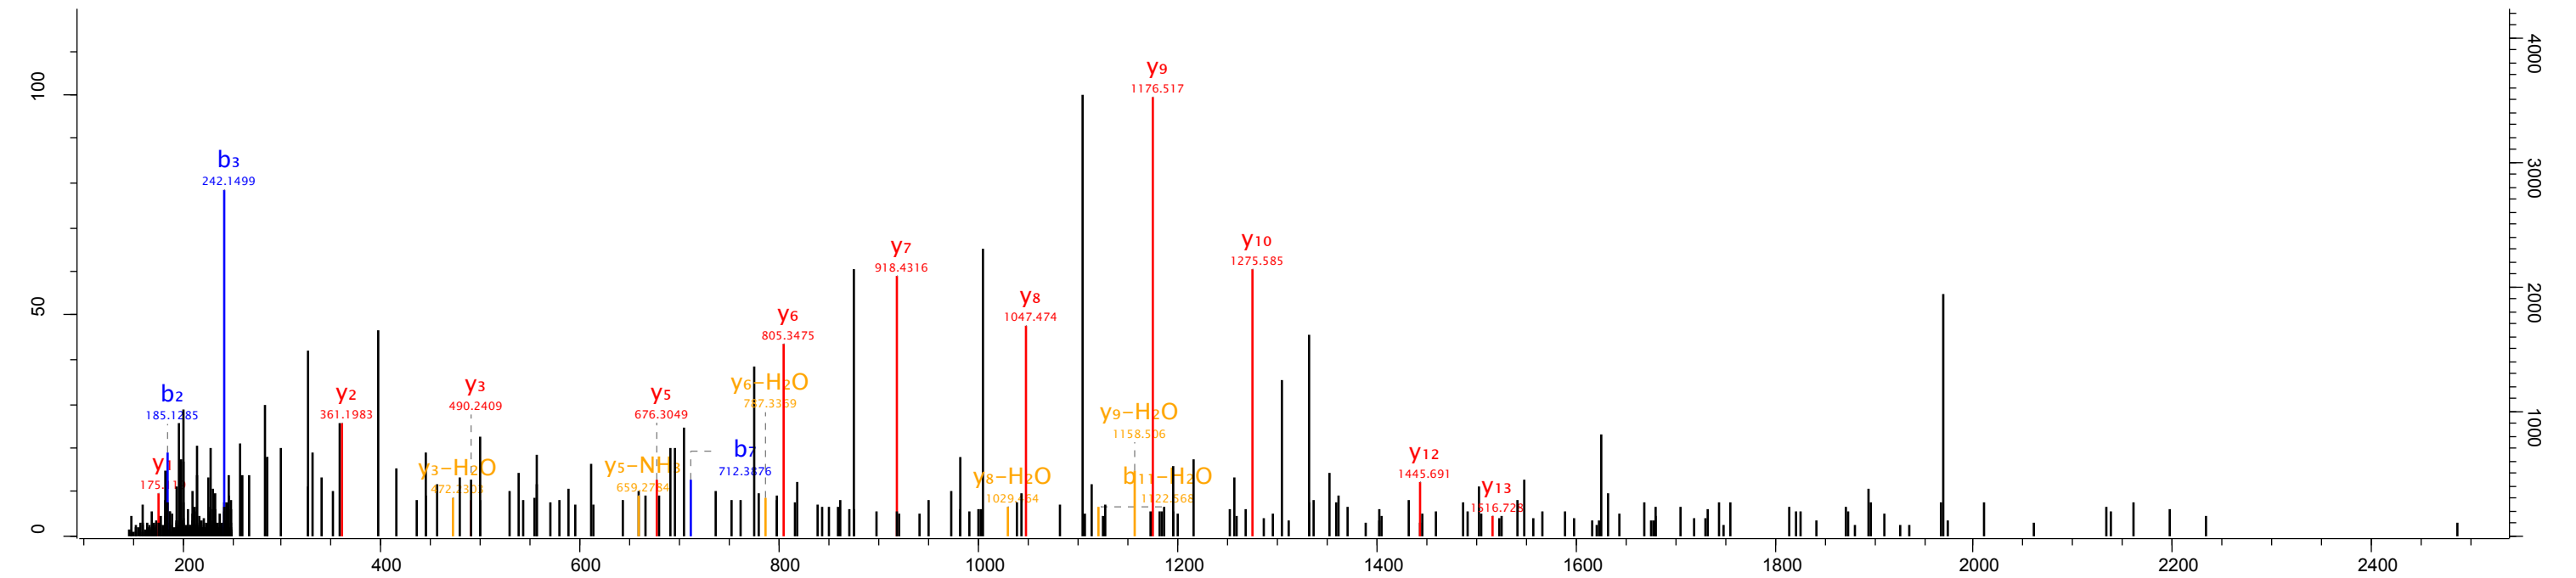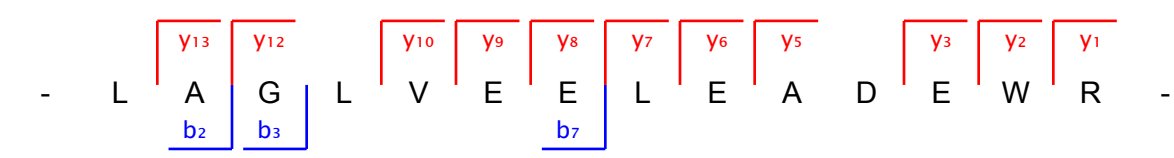

Raw file  
20150307\_MEF1\_Top\_opt\_E1\_01\_1684

Scan 63743 Method TOF; CID Score 79.68 m/z 737.03 Gene names Eri3

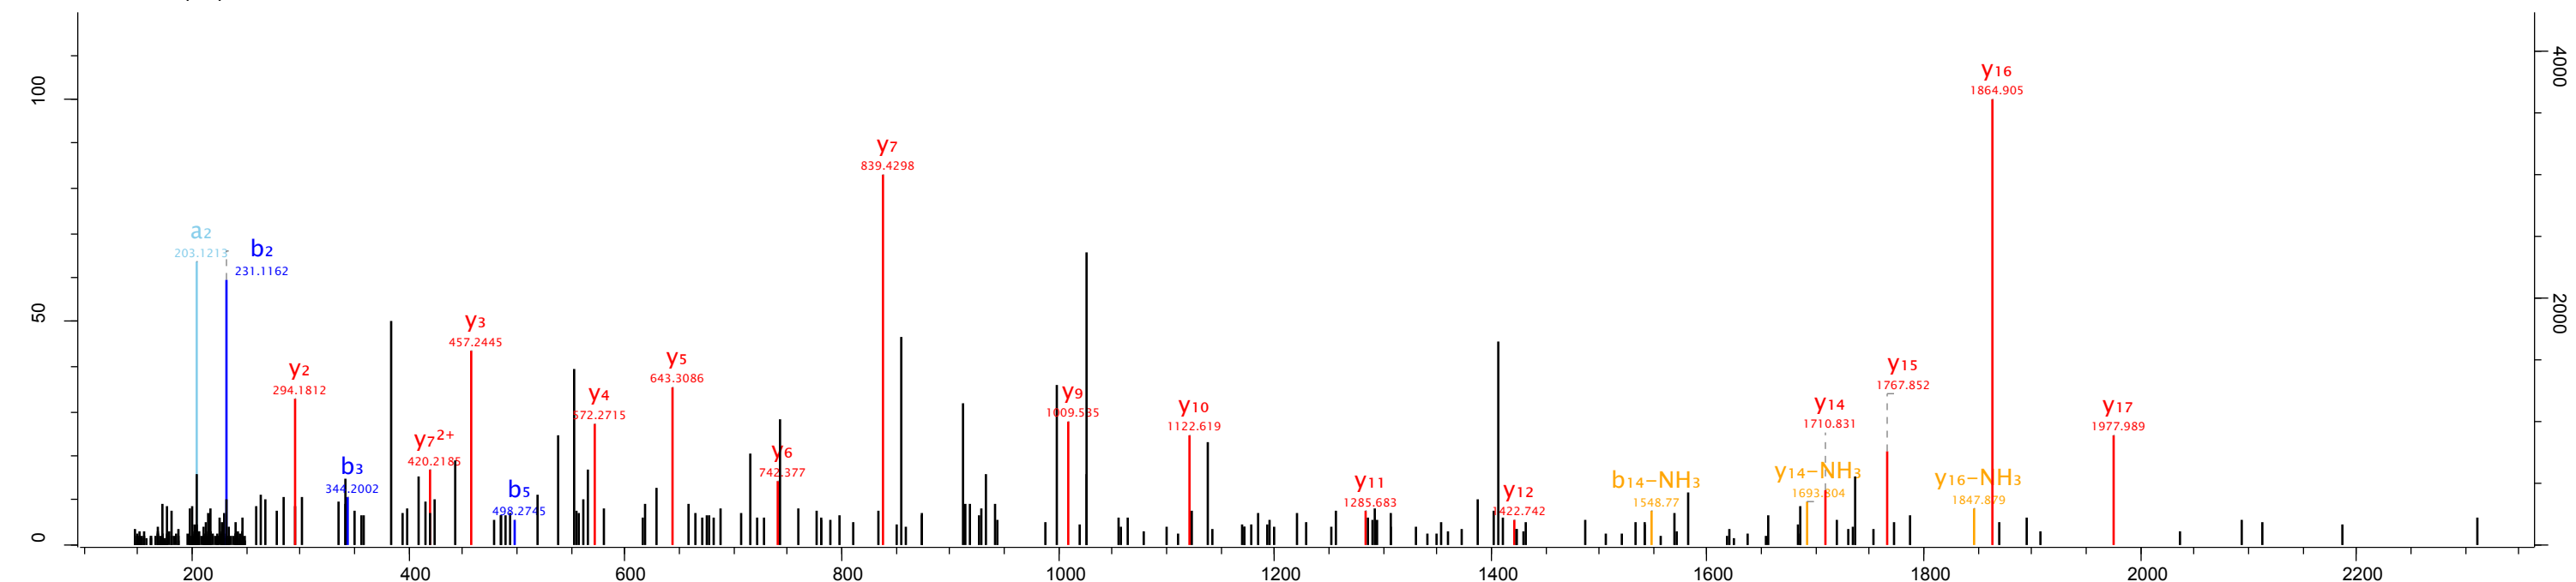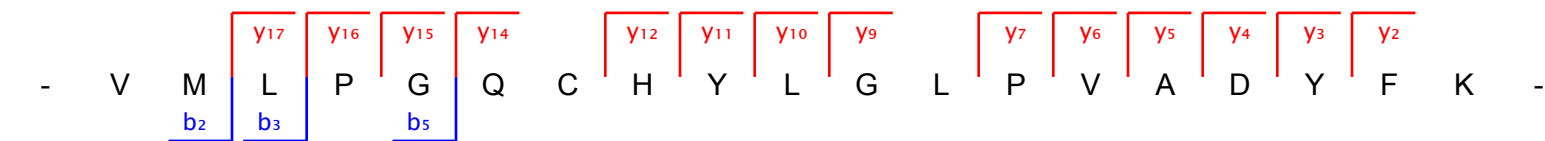

Raw file 20150307\_MEF1\_Top\_opt\_E1\_01\_1684 Scan 66442 Method TOF; CID Score 42.73 m/z 1161.24 Gene names Mrpl52

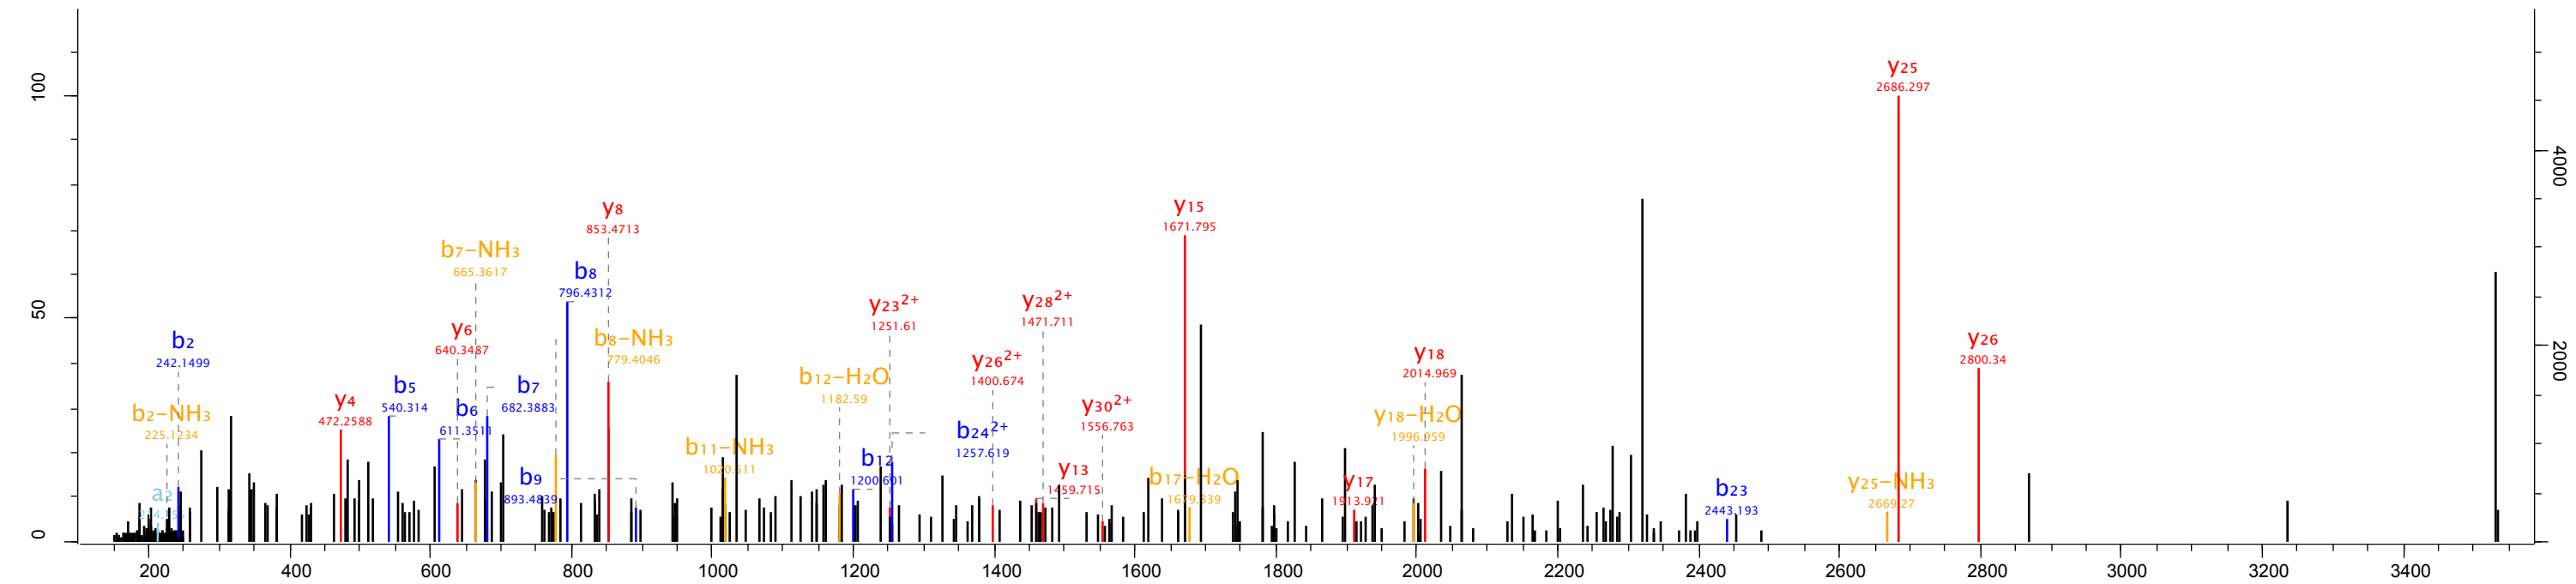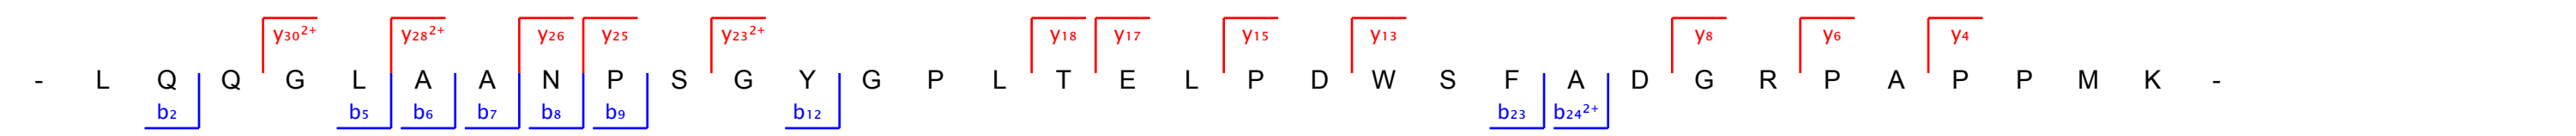

Raw file 20150307\_MEF2\_Top\_opt\_E2\_01\_1679 Scan 15449 Method TOF; CID Score 40.24 m/z 486.23 Gene names 1700034J04Rik

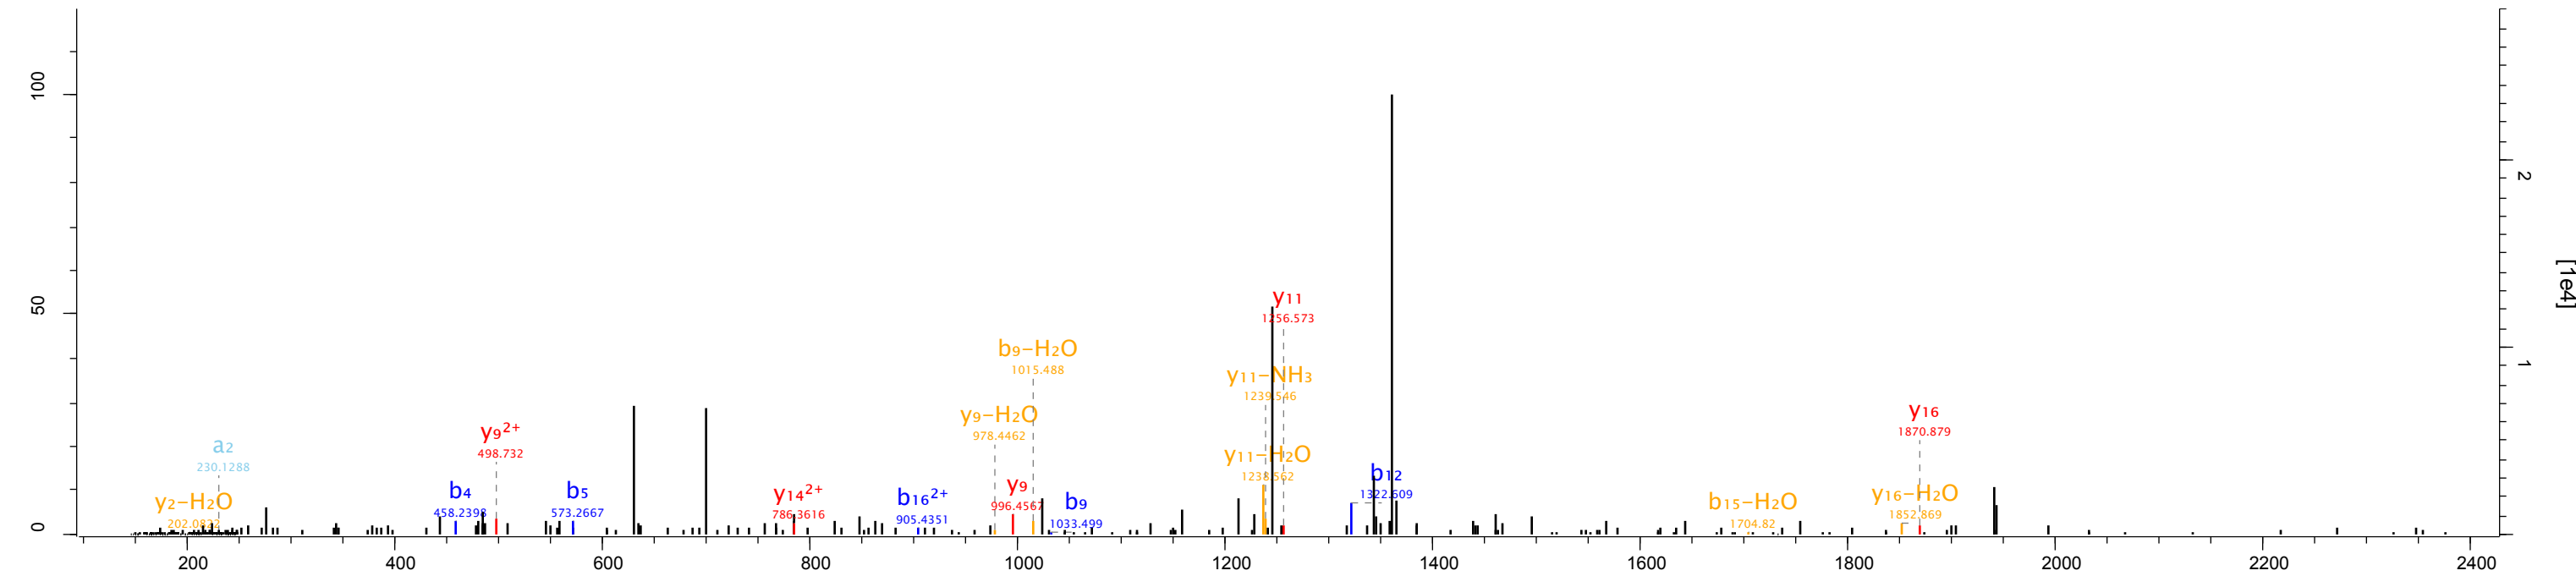

- A W L S D L Y P S S M A F P R S N -

Fragmentation mapping (red boxes): y16 (W), y14<sup>2+</sup> (S), y11 (Y), y9 (S)

Fragmentation mapping (blue boxes): a2 (W), b4 (S), b5 (D), b9 (S), b12 (A), b16<sup>2+</sup> (R)

Raw file  
20150307\_MEF2\_Top\_opt\_E2\_01\_1679

Scan 48023 Method TOF; CID Score 81.68 m/z 659.37 Gene names Mrps33

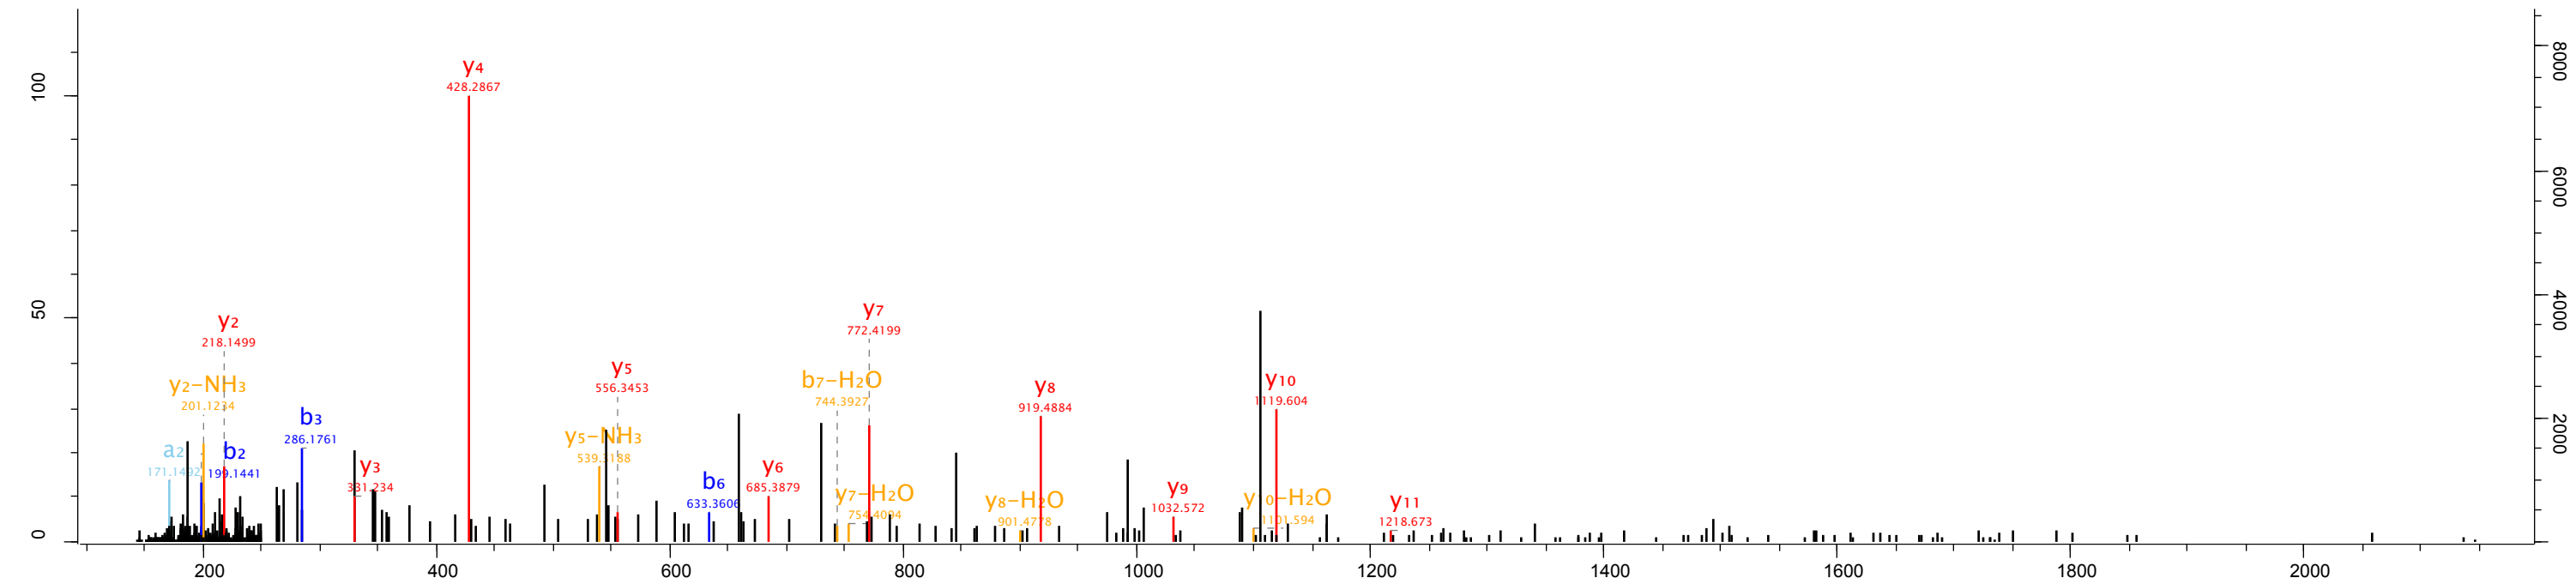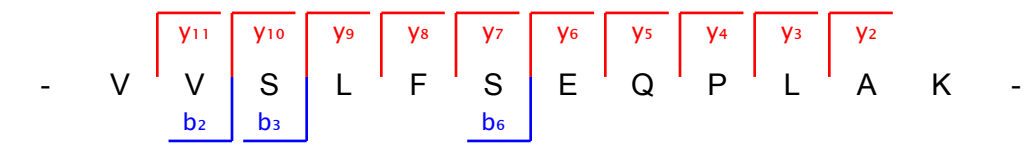



Raw file 20150307\_MEF2\_Top\_opt\_E2\_01\_1679 Scan 61671 Method TOF; CID Score 58.09 m/z 820.42 Gene names Ctdnep1

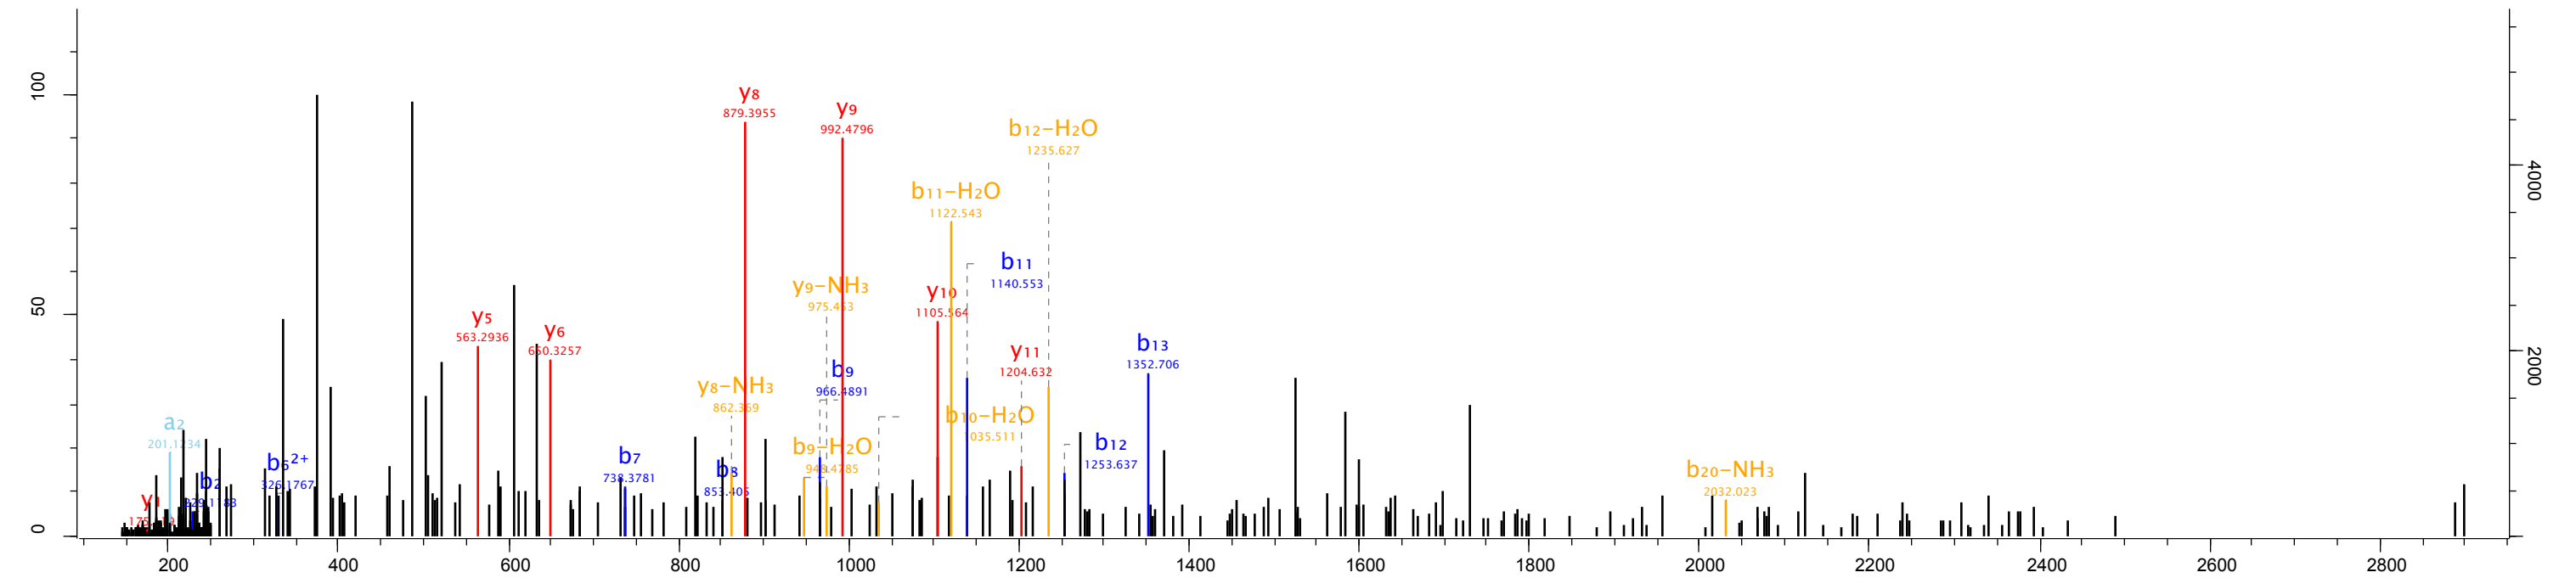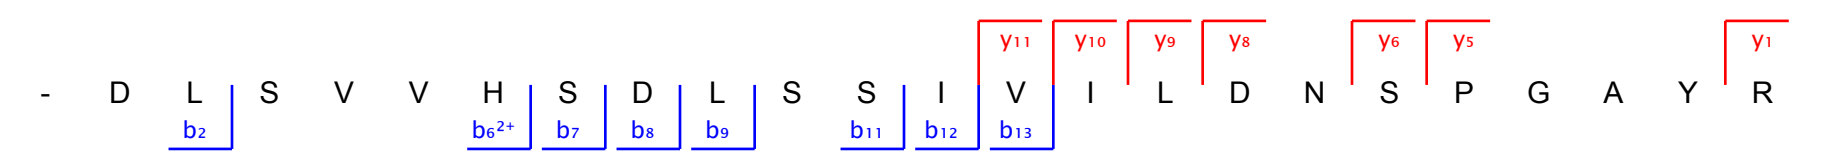

Raw file 20150307\_MEF2\_Top\_opt\_E2\_01\_1687 Scan 9922 Method TOF; CID Score 79.88 m/z 622.97 Gene names Cgref1

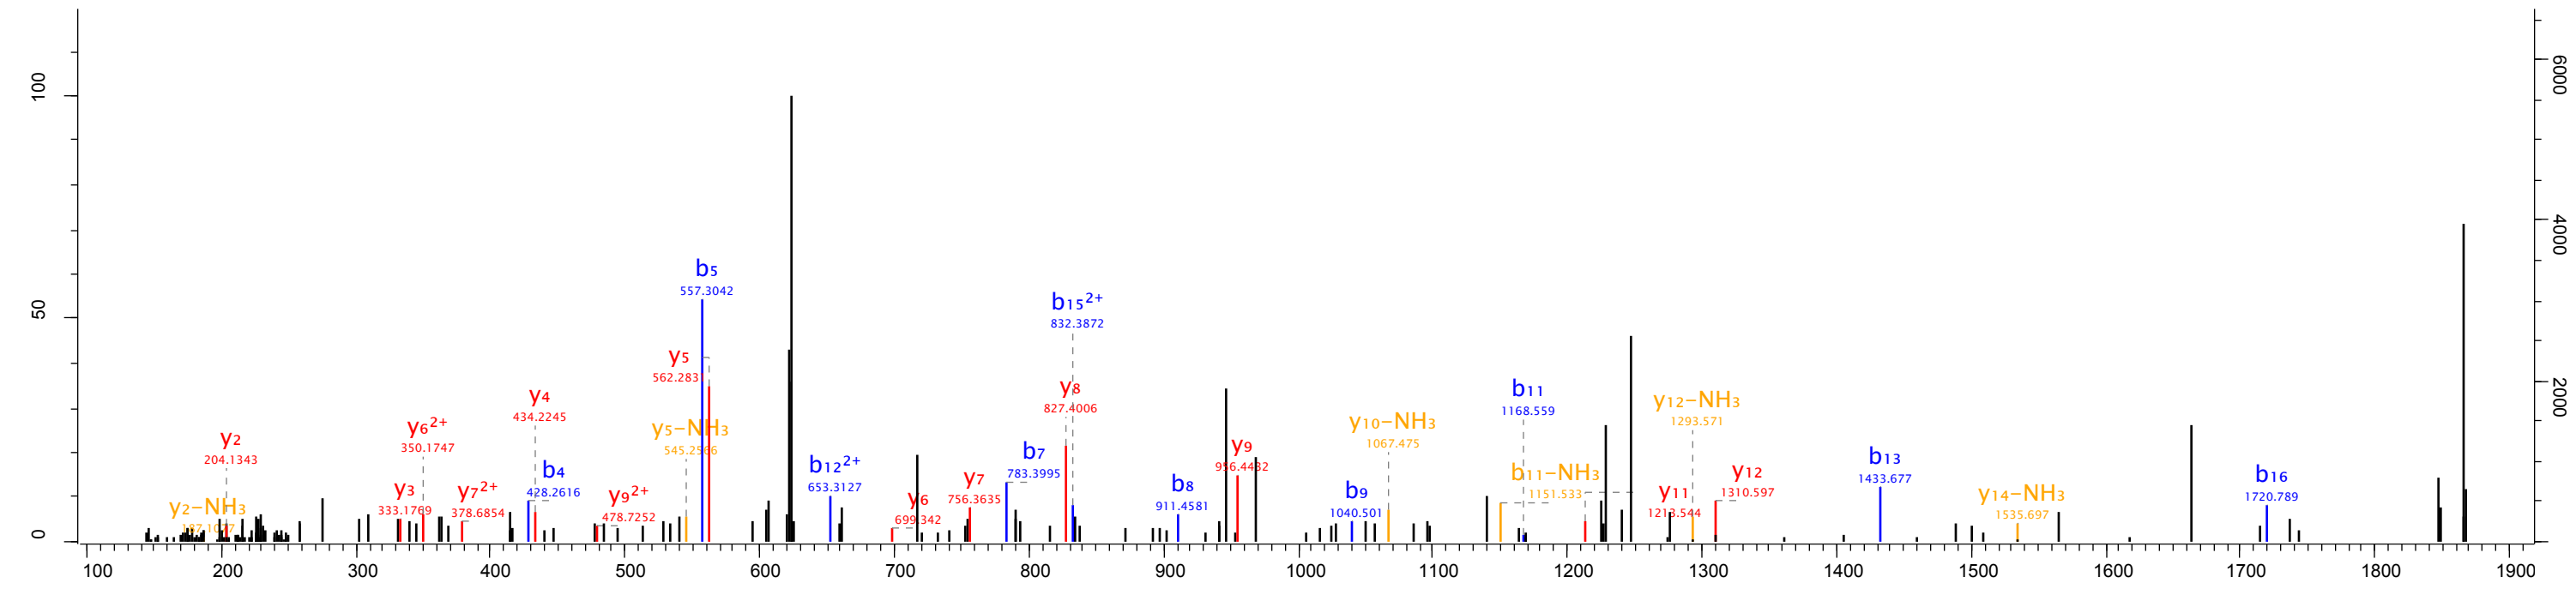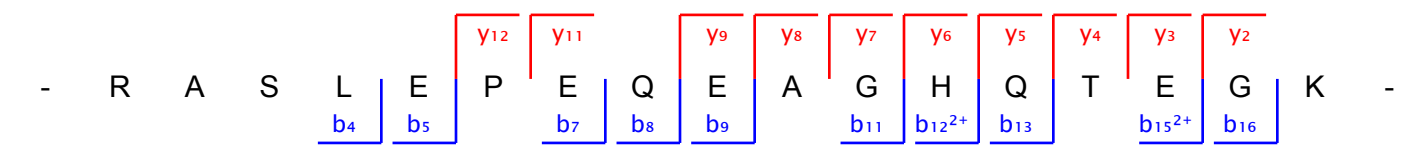

Raw file 20150307\_MEF2\_Top\_opt\_E2\_01\_1687 Scan 13121 Method TOF; CID Score 83.14 m/z 609.31 Gene names Armcx2

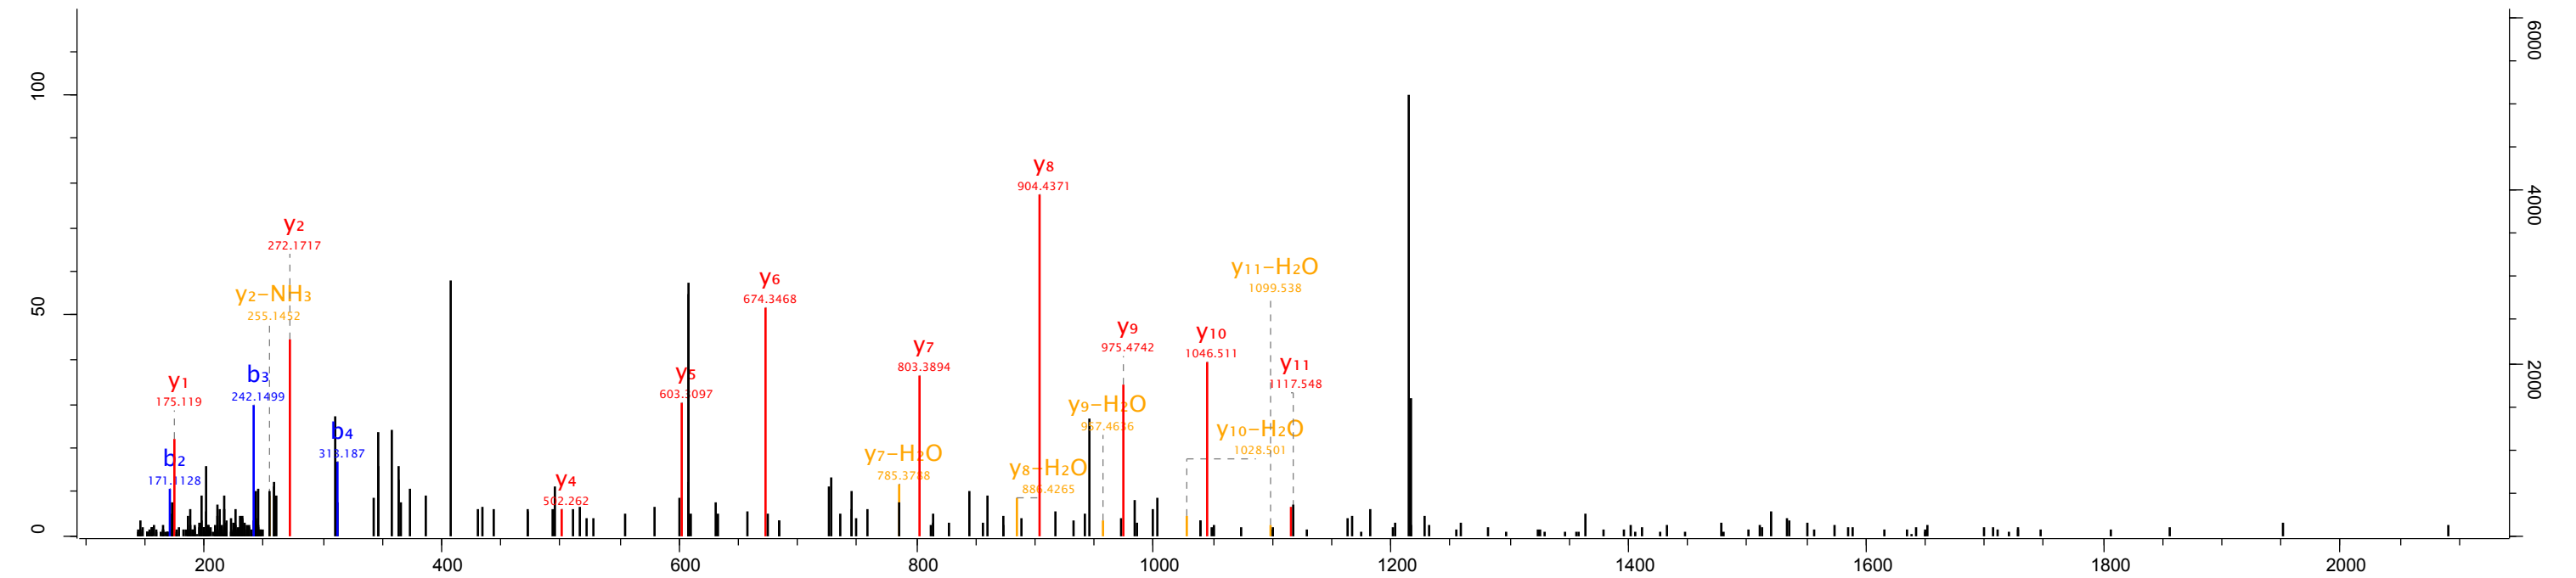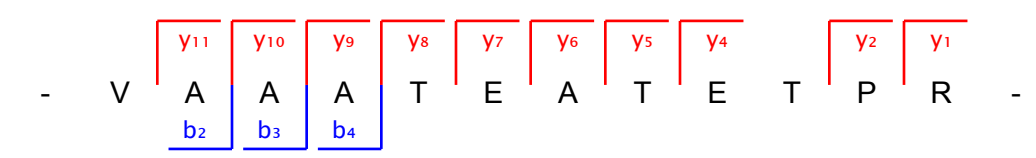

Raw file  
20150307\_MEF2\_Top\_opt\_E2\_01\_1687

Scan 14173 Method TOF; CID Score 48.42 m/z 483.5 Gene names Wfikkn1

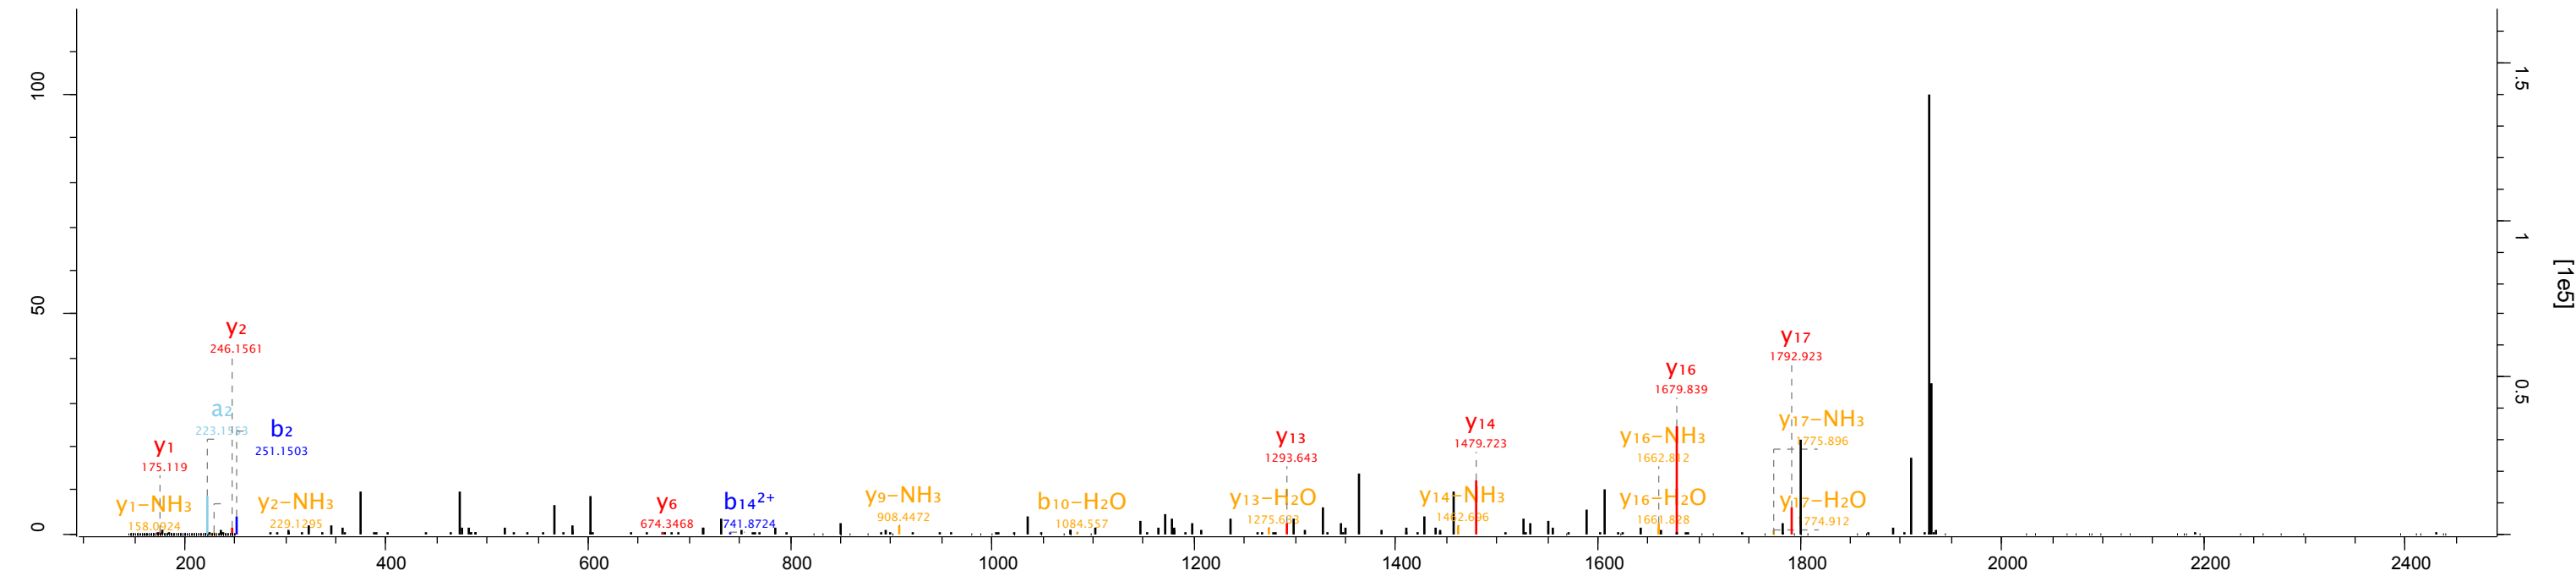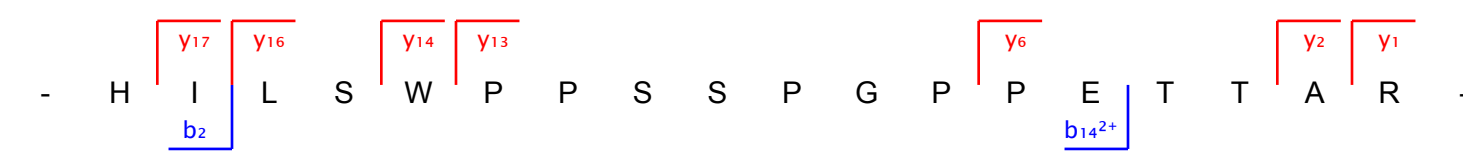

Raw file  
20150307\_MEF2\_Top\_opt\_E2\_01\_1687

Scan 14537 Method TOF; CID Score 65.84 m/z 641.29 Gene names Ndufv3

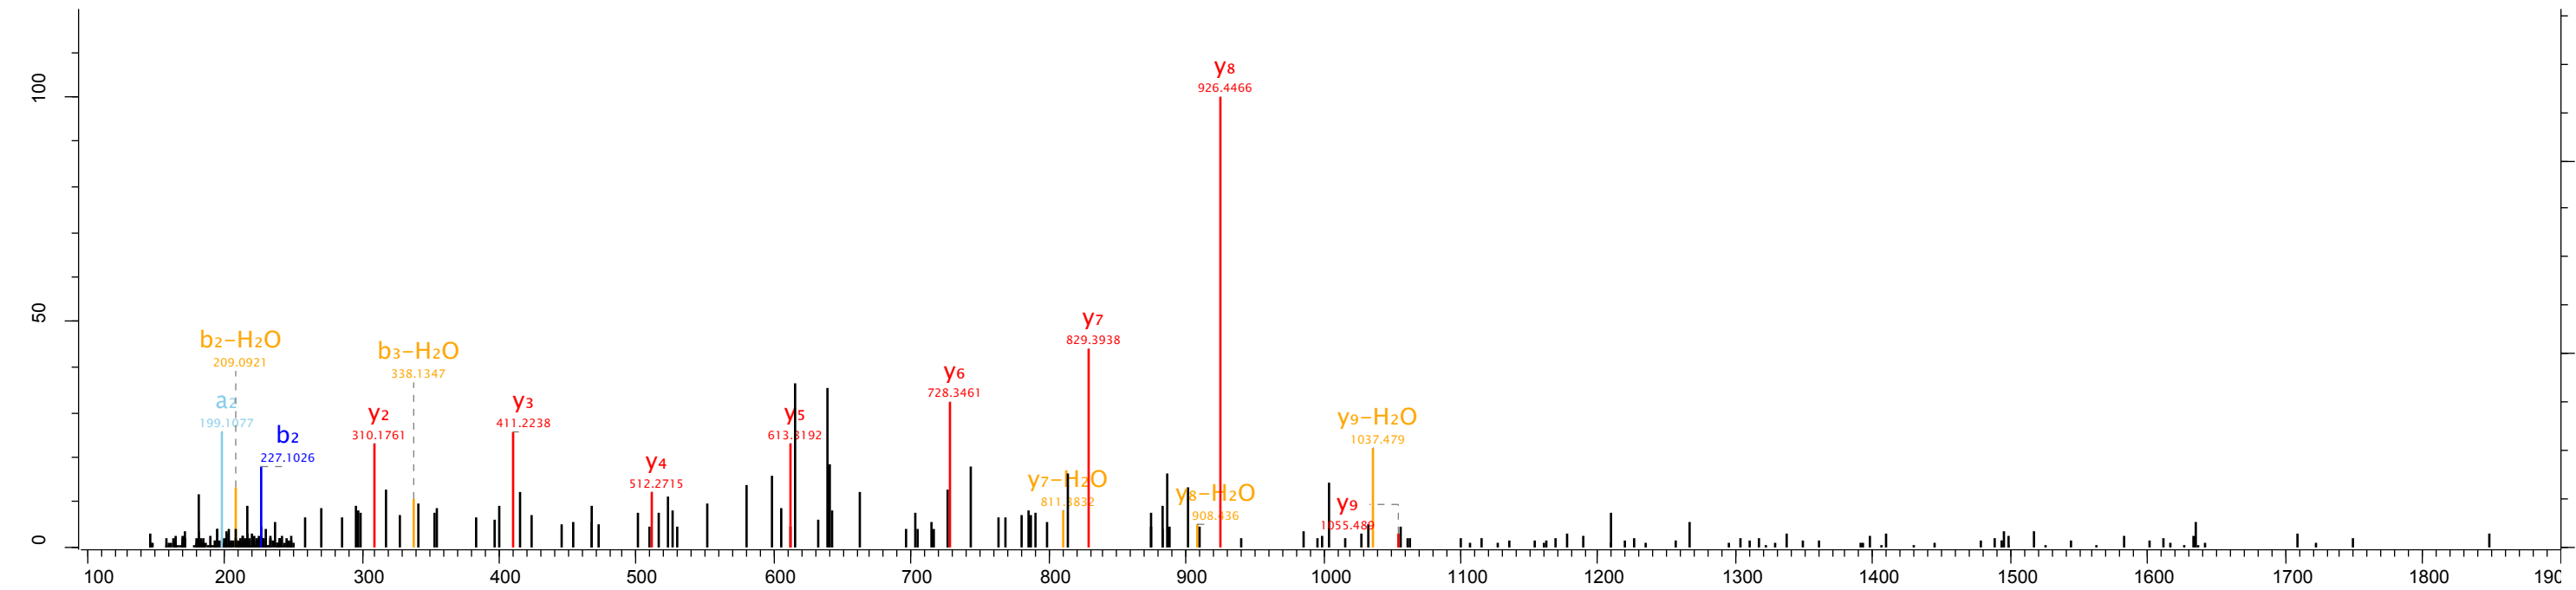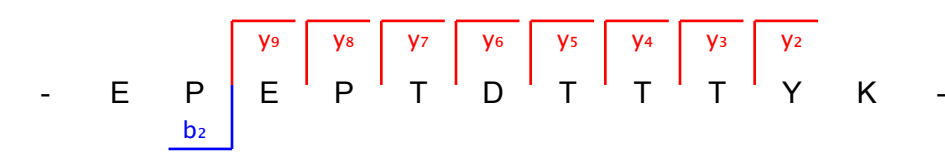

Raw file 20150307\_MEF2\_Top\_opt\_E2\_01\_1687 Scan 15716 Method TOF; CID Score 79.15 m/z 568.78 Gene names Dyrk1a;Dyrk1b

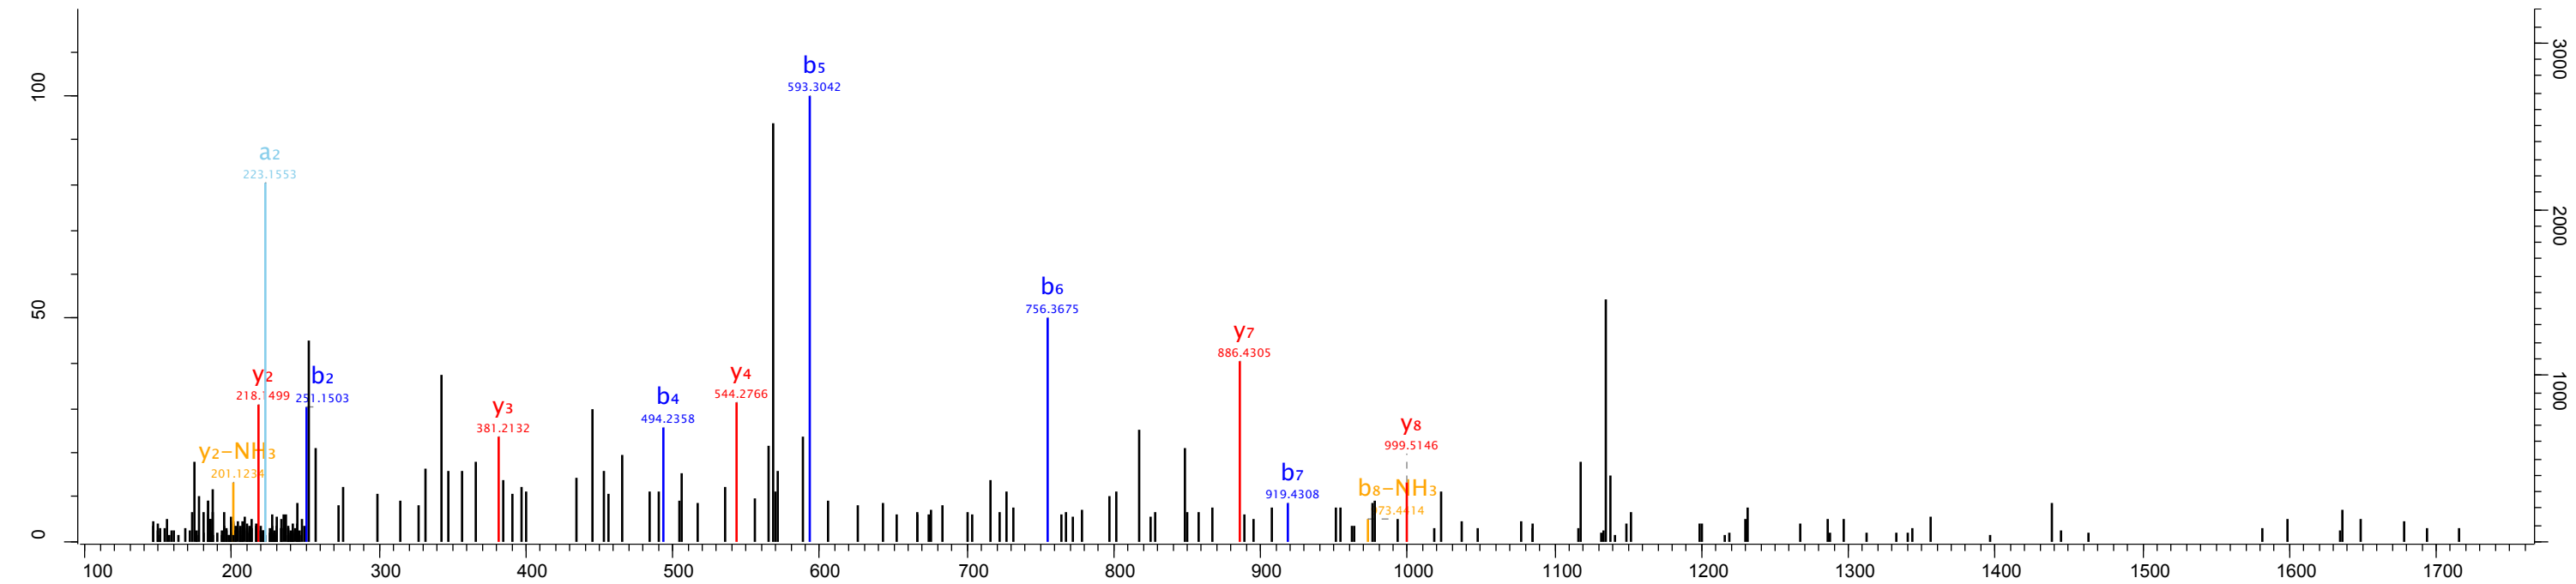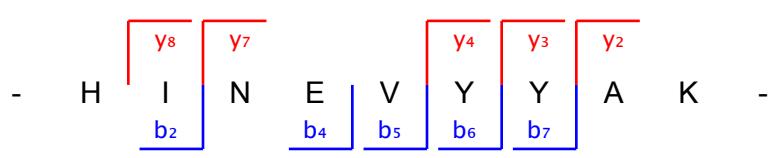

Raw file  
20150307\_MEF2\_Top\_opt\_E2\_01\_1687

Scan 37855 Method TOF; CID Score 50.9 m/z 786.42 Gene names Endod1

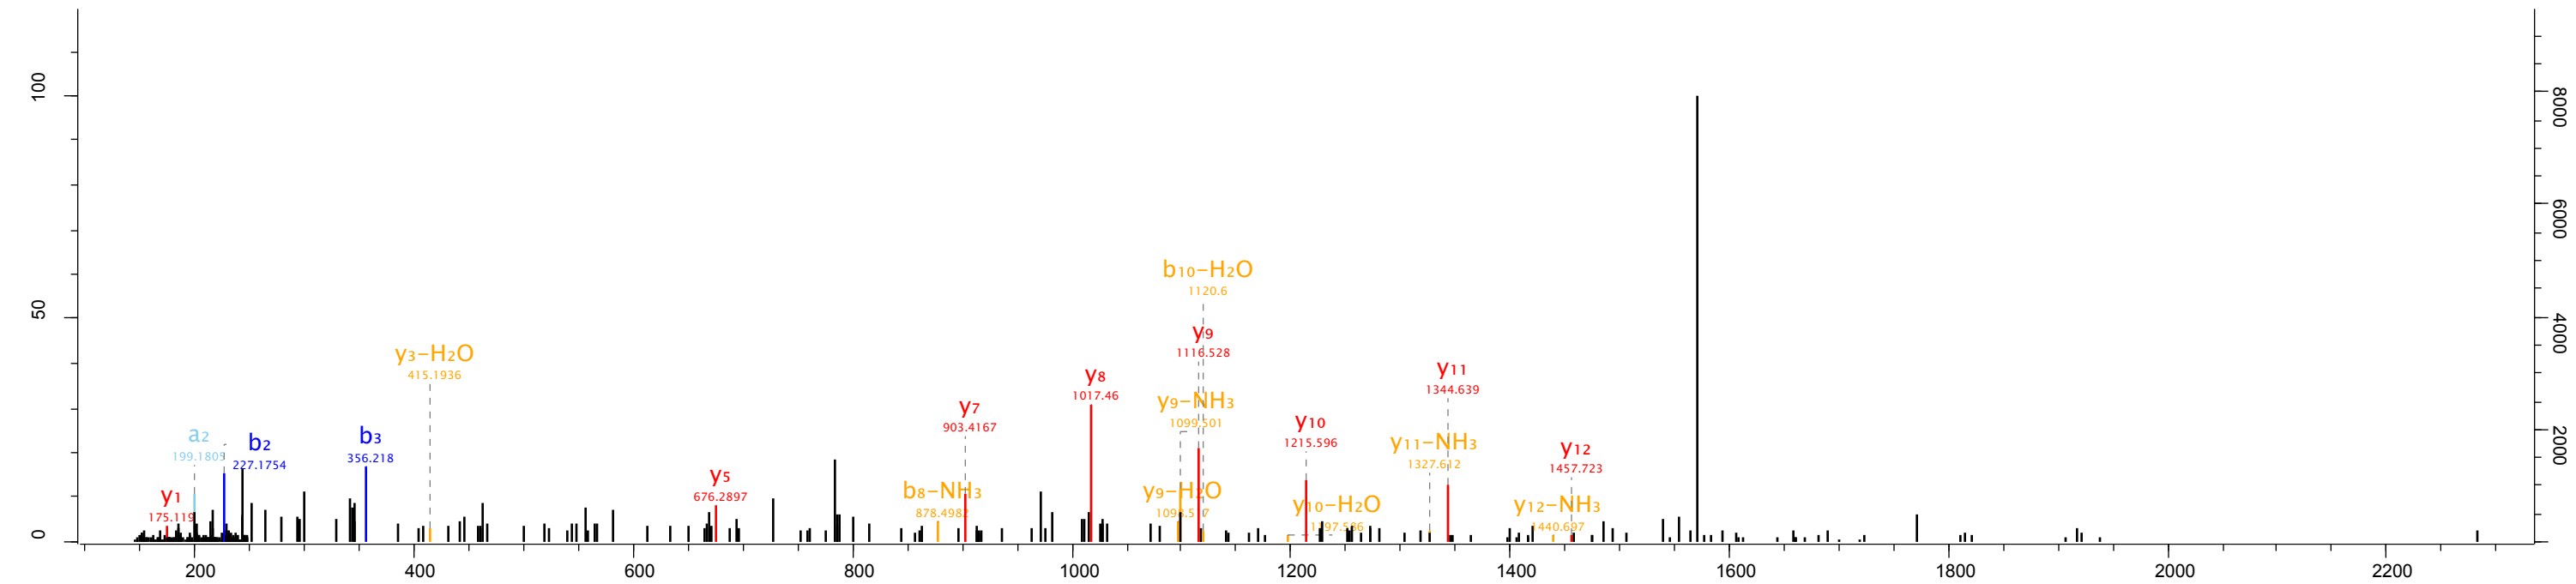

- I L E V V N Q V Q D E E R -  
b<sub>2</sub> b<sub>3</sub>

Raw file 20150307\_MEF2\_Top\_opt\_E2\_01\_1687 Scan 39813 Method TOF; CID Score 60.97 m/z 577.29 Gene names Akt1s1

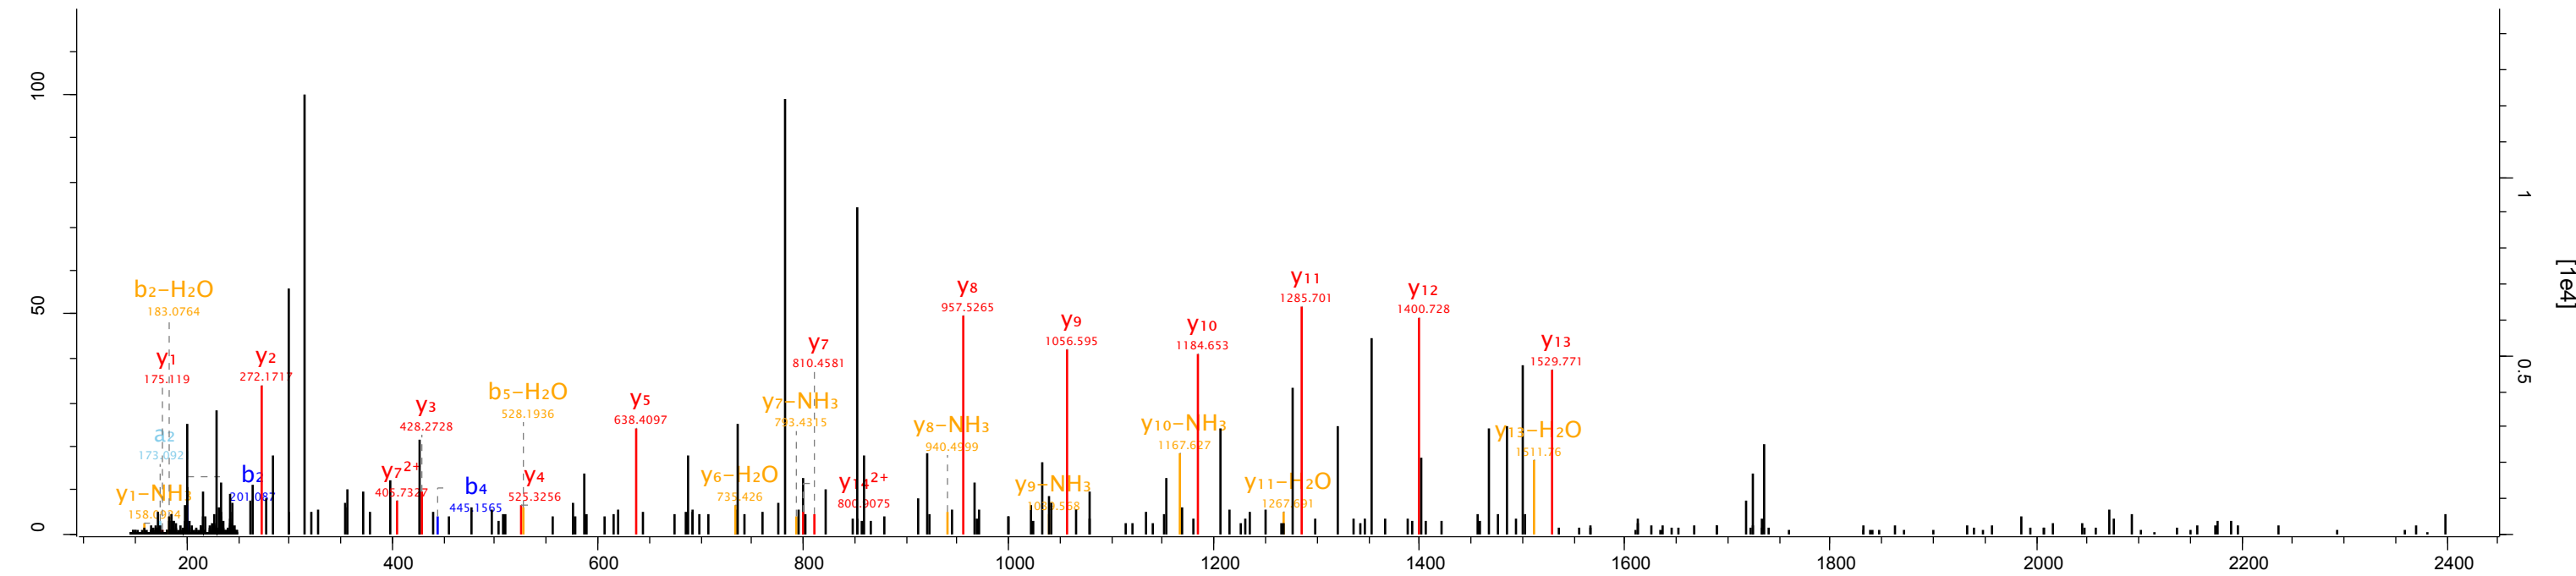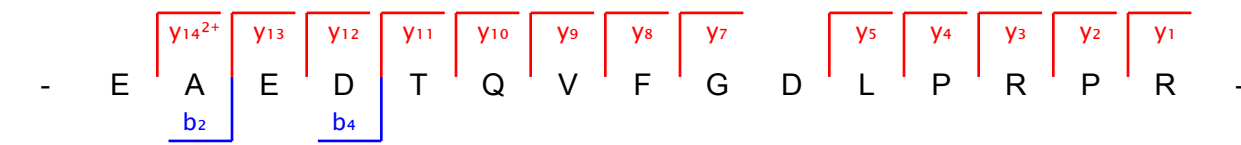



Raw file 20150307\_MEF2\_Top\_opt\_E2\_01\_1687 Scan 41202 Method TOF; CID Score 56.96 m/z 600.86 Gene names Gmeb2

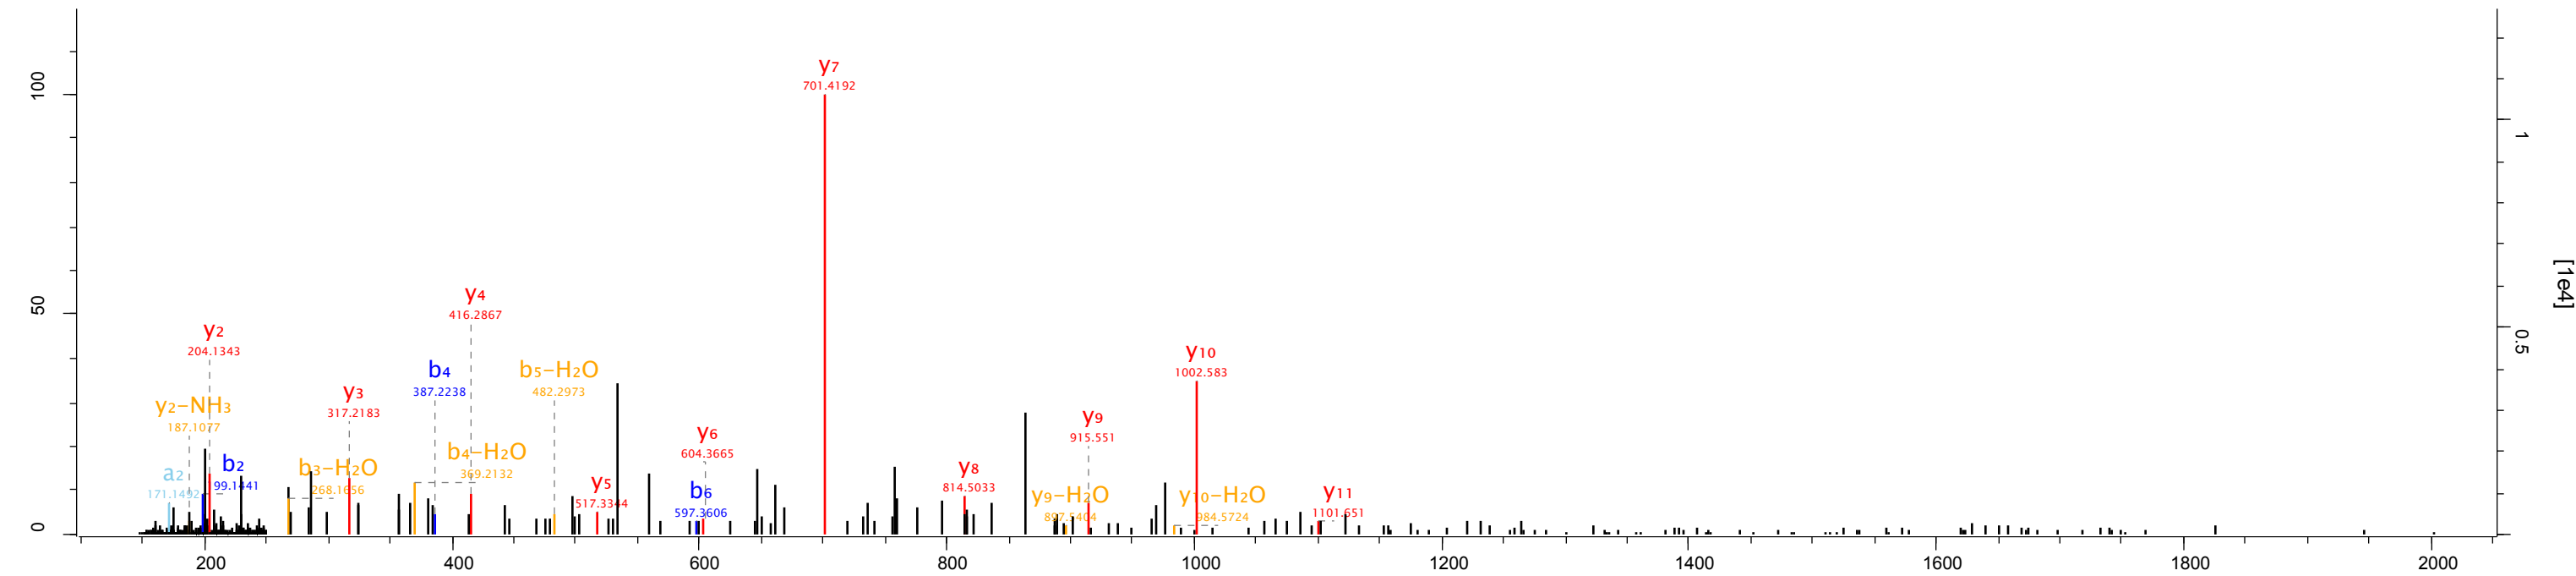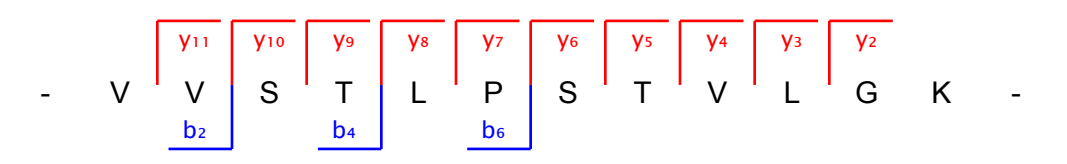

Raw file  
20150307\_MEF2\_Top\_opt\_E2\_01\_1687

Scan 46351 Method TOF; CID Score 43.95 m/z 579.29 Gene names Napepld

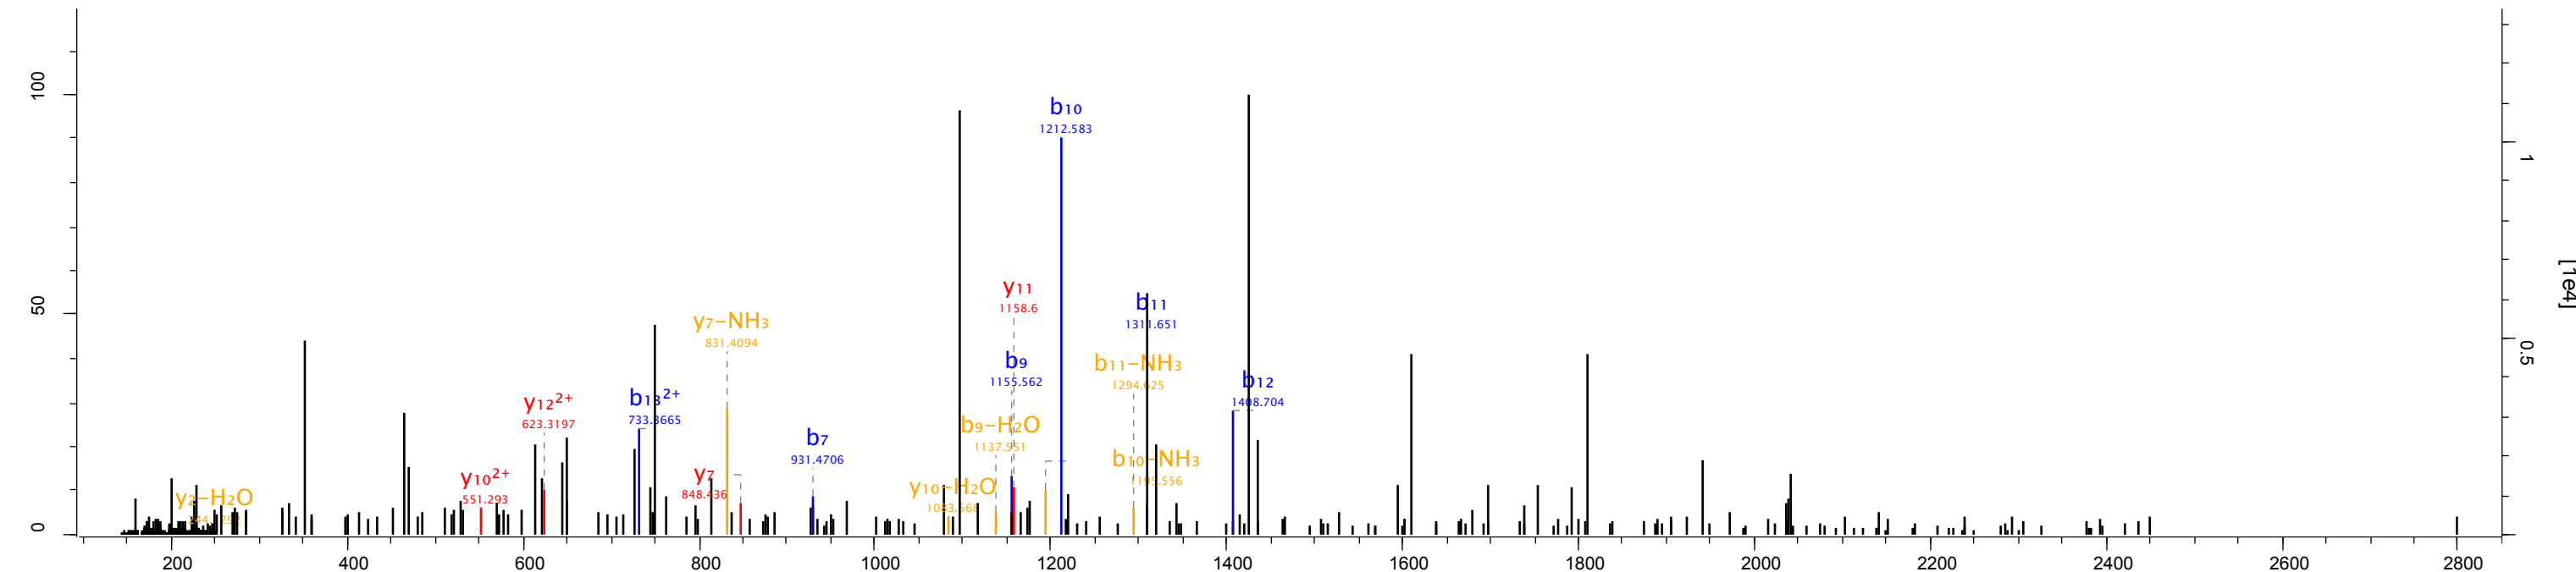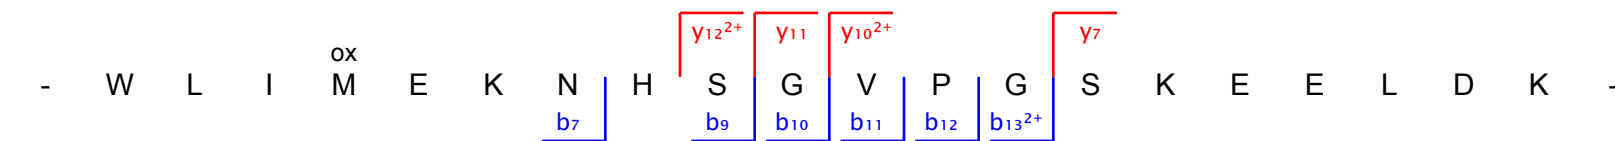

Raw file 20150307\_MEF2\_Top\_opt\_E2\_01\_1687 Scan 55276 Method TOF; CID Score 100.62 m/z 882.44 Gene names Rpe

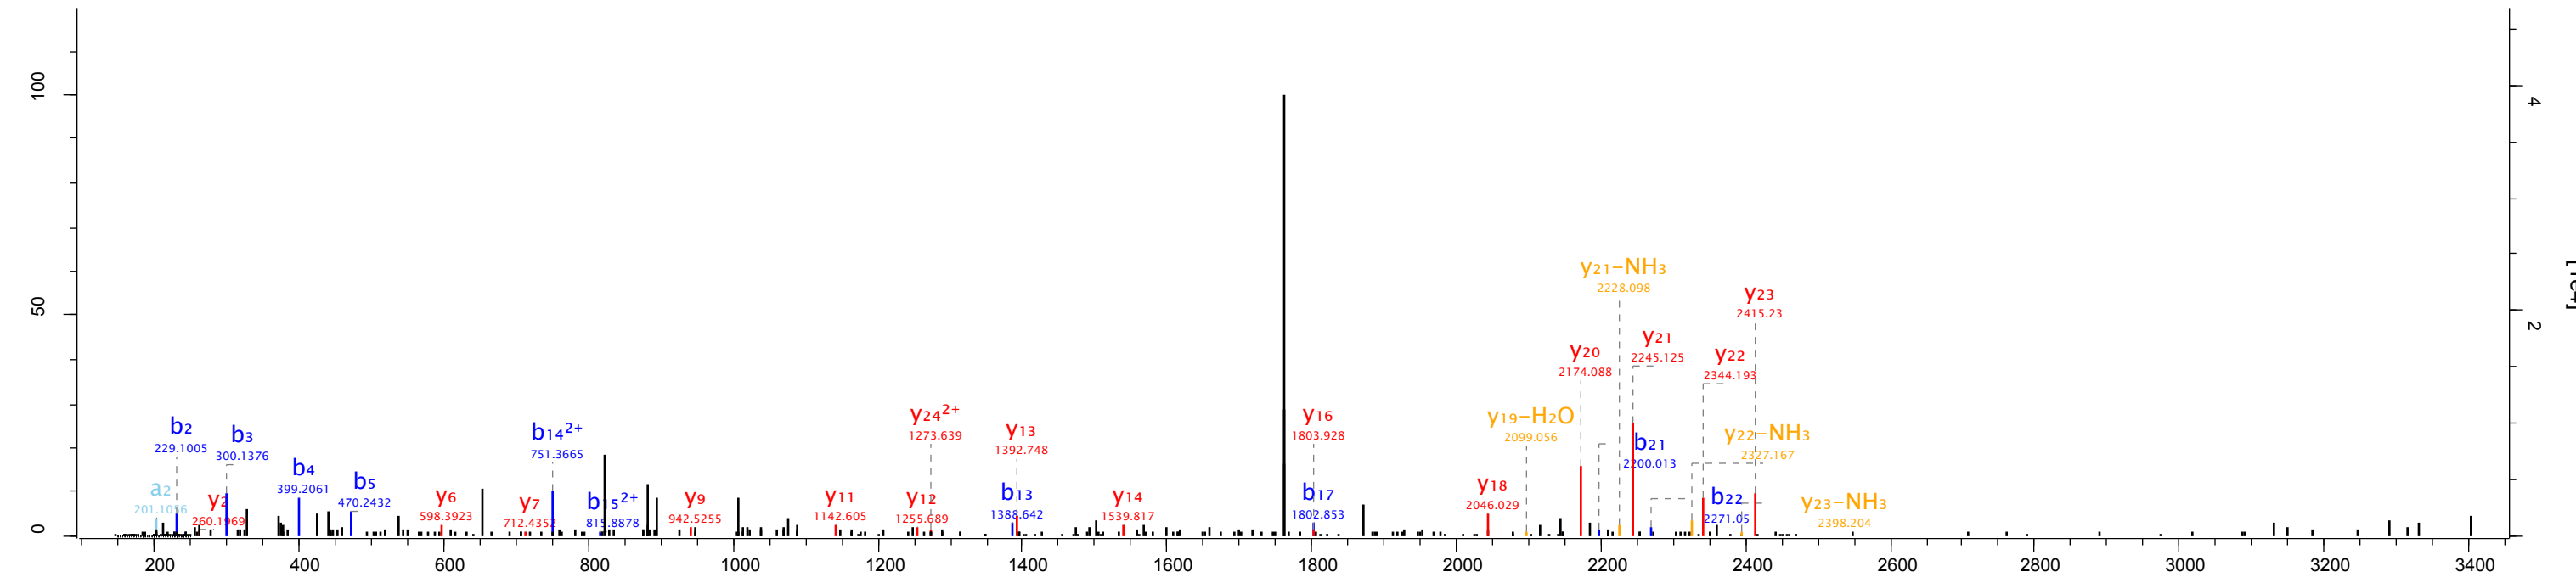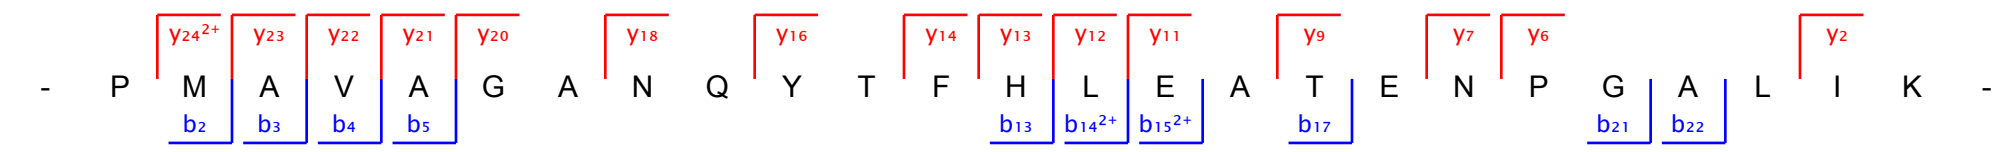

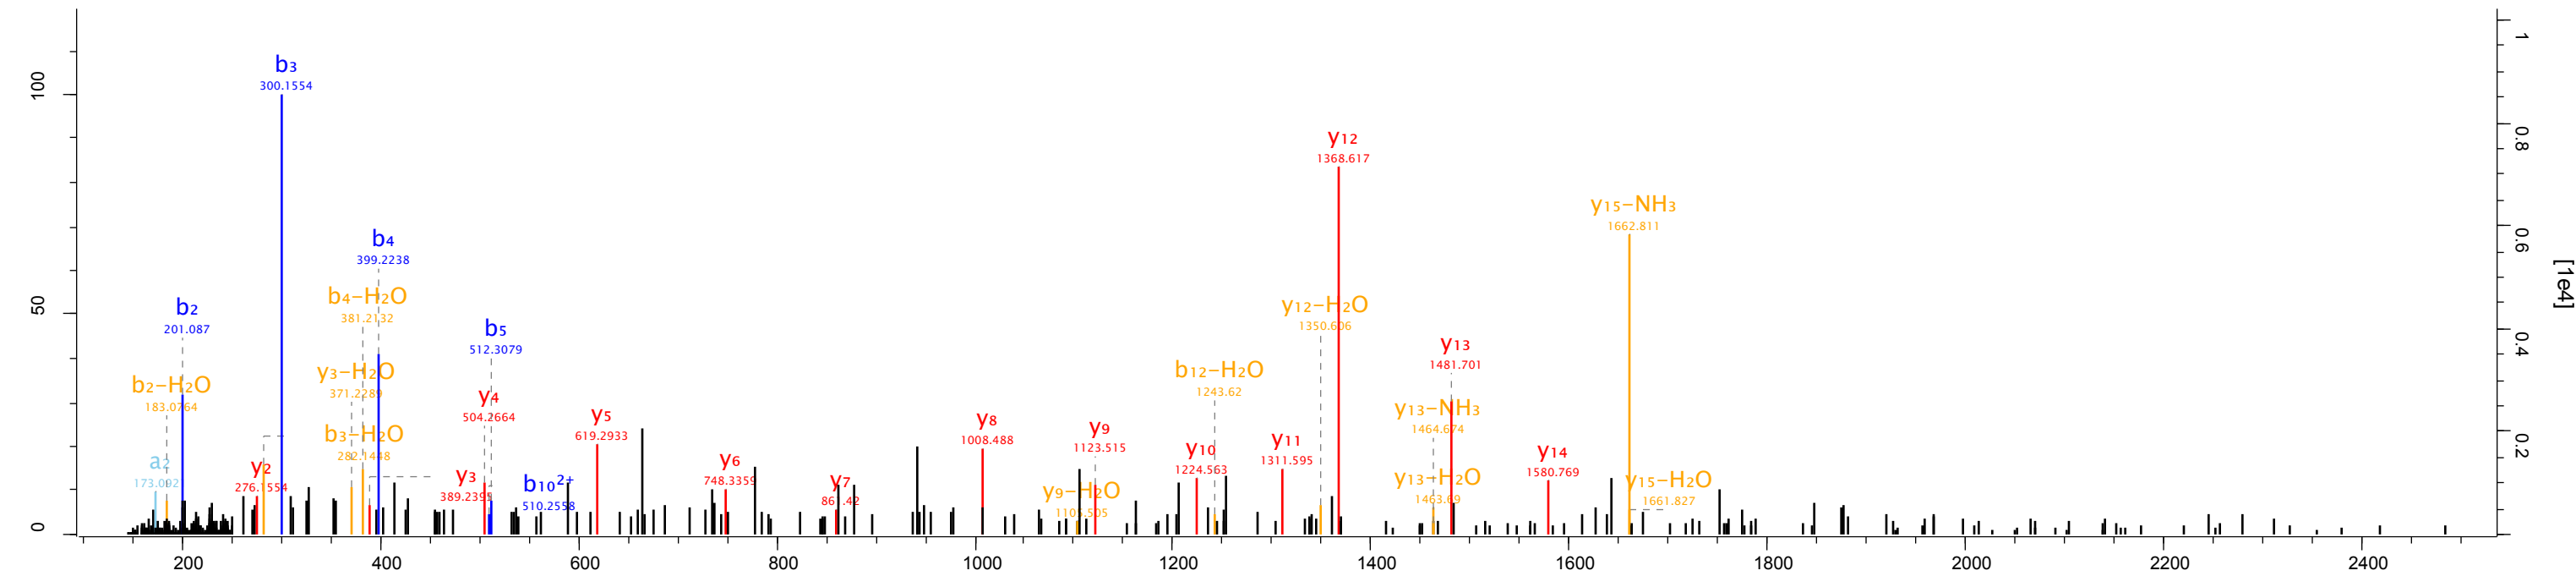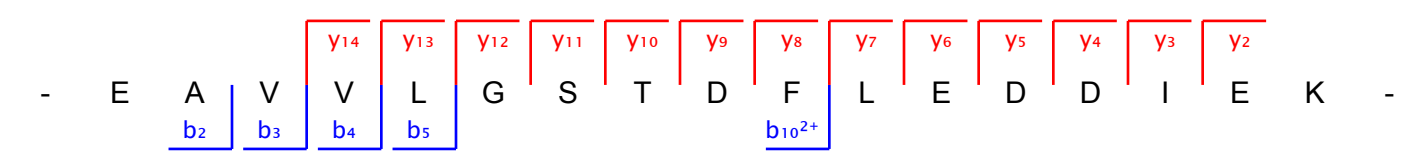

Raw file 20150307\_MEF2\_Top\_opt\_E2\_01\_1687 Scan 59996 Method TOF; CID Score 49.66 m/z 829.08 Gene names Fdx1l

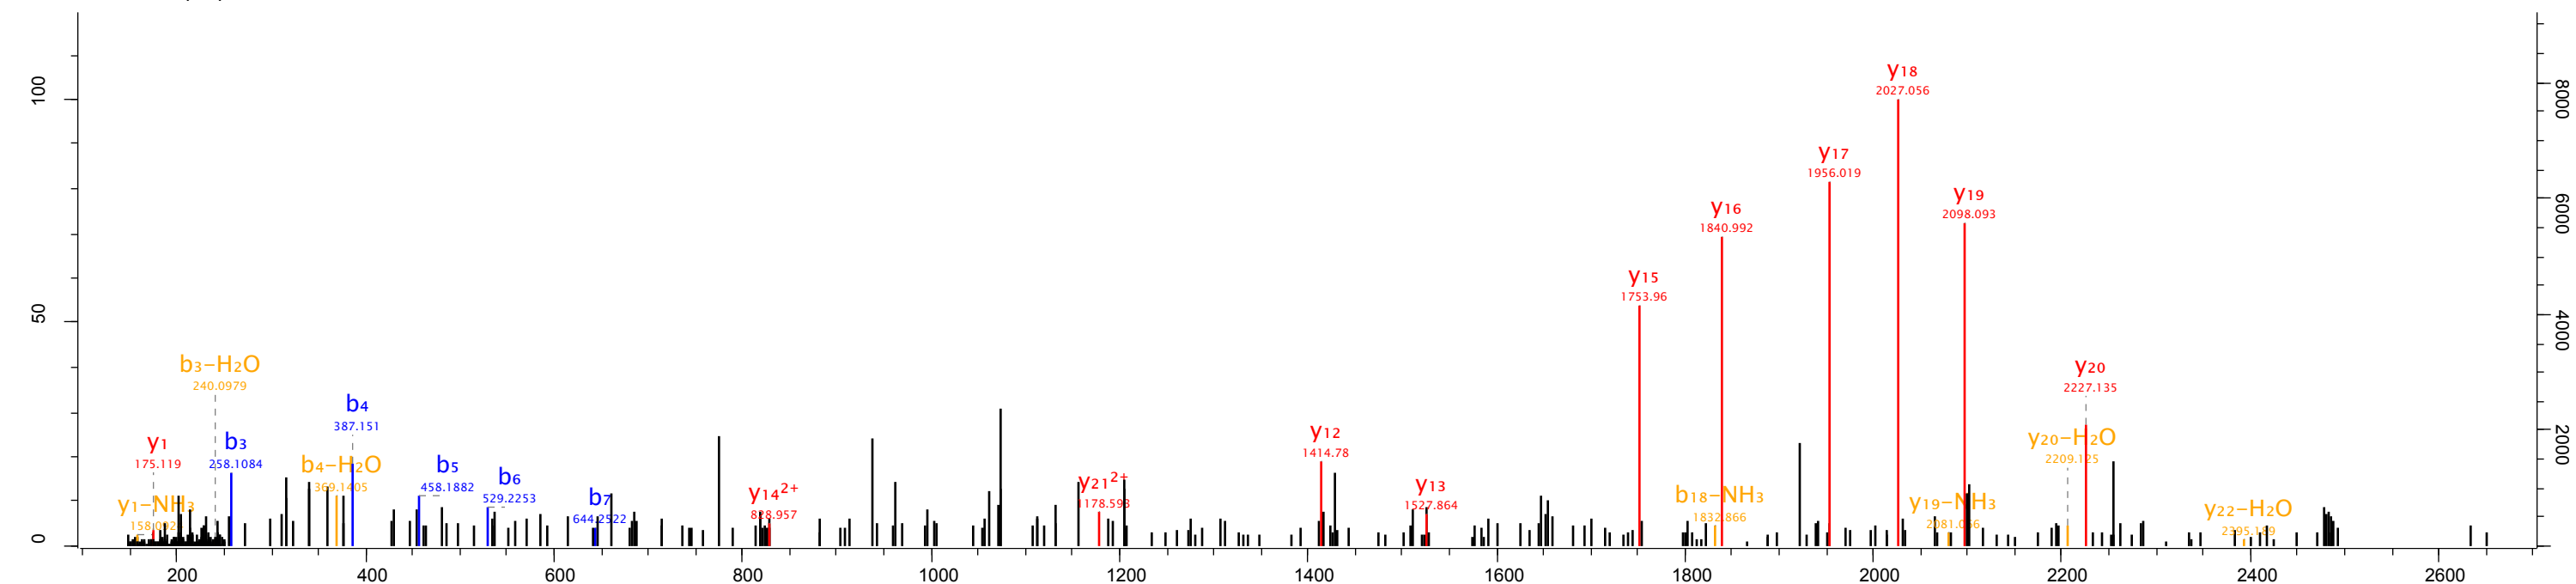

- A G E E A A D S P E L P R D V V N V V F V D R -

y<sub>21</sub><sup>2+</sup>
y<sub>20</sub>
y<sub>19</sub>
y<sub>18</sub>
y<sub>17</sub>
y<sub>16</sub>
y<sub>15</sub>
y<sub>14</sub><sup>2+</sup>
y<sub>13</sub>
y<sub>12</sub>
y<sub>1</sub>

b<sub>3</sub>
b<sub>4</sub>
b<sub>5</sub>
b<sub>6</sub>
b<sub>7</sub>

Raw file 20150307\_MEF2\_Top\_opt\_E2\_01\_1687 Scan 65933 Method TOF; CID Score 69.77 m/z 740.38 Gene names Txndc15

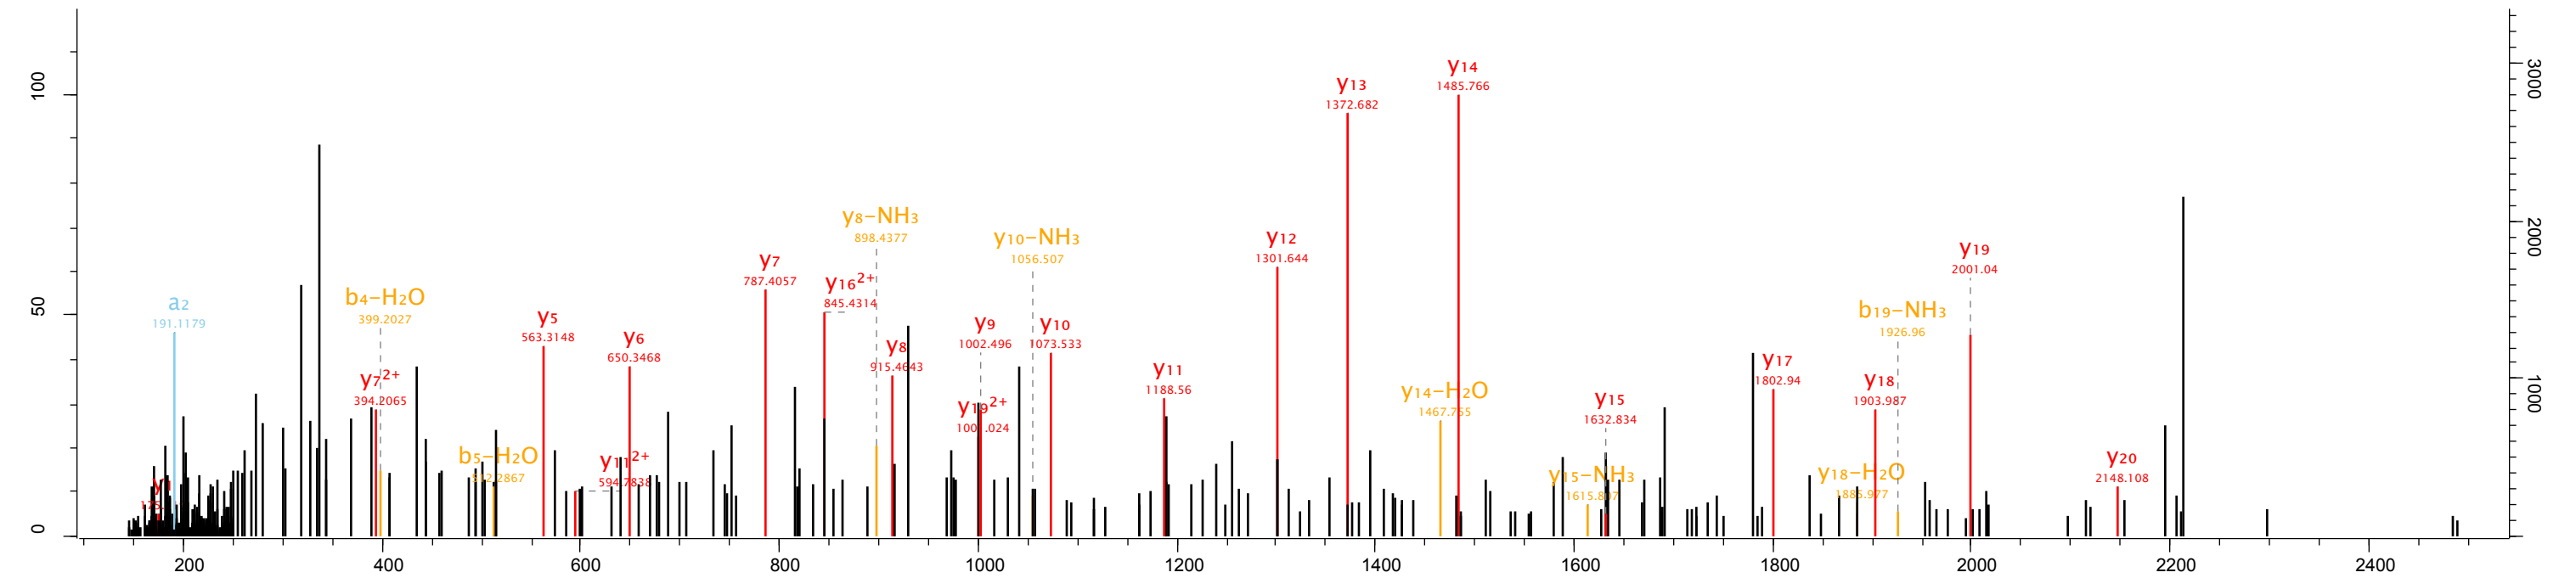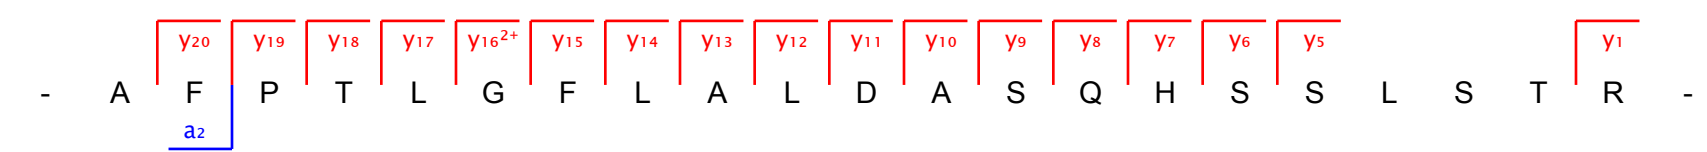

Raw file  
20150307\_MEF2\_Top\_opt\_E2\_01\_1687

Scan 70556 Method TOF; CID Score 85.47 m/z 814.95 Gene names Grk5;Grk6

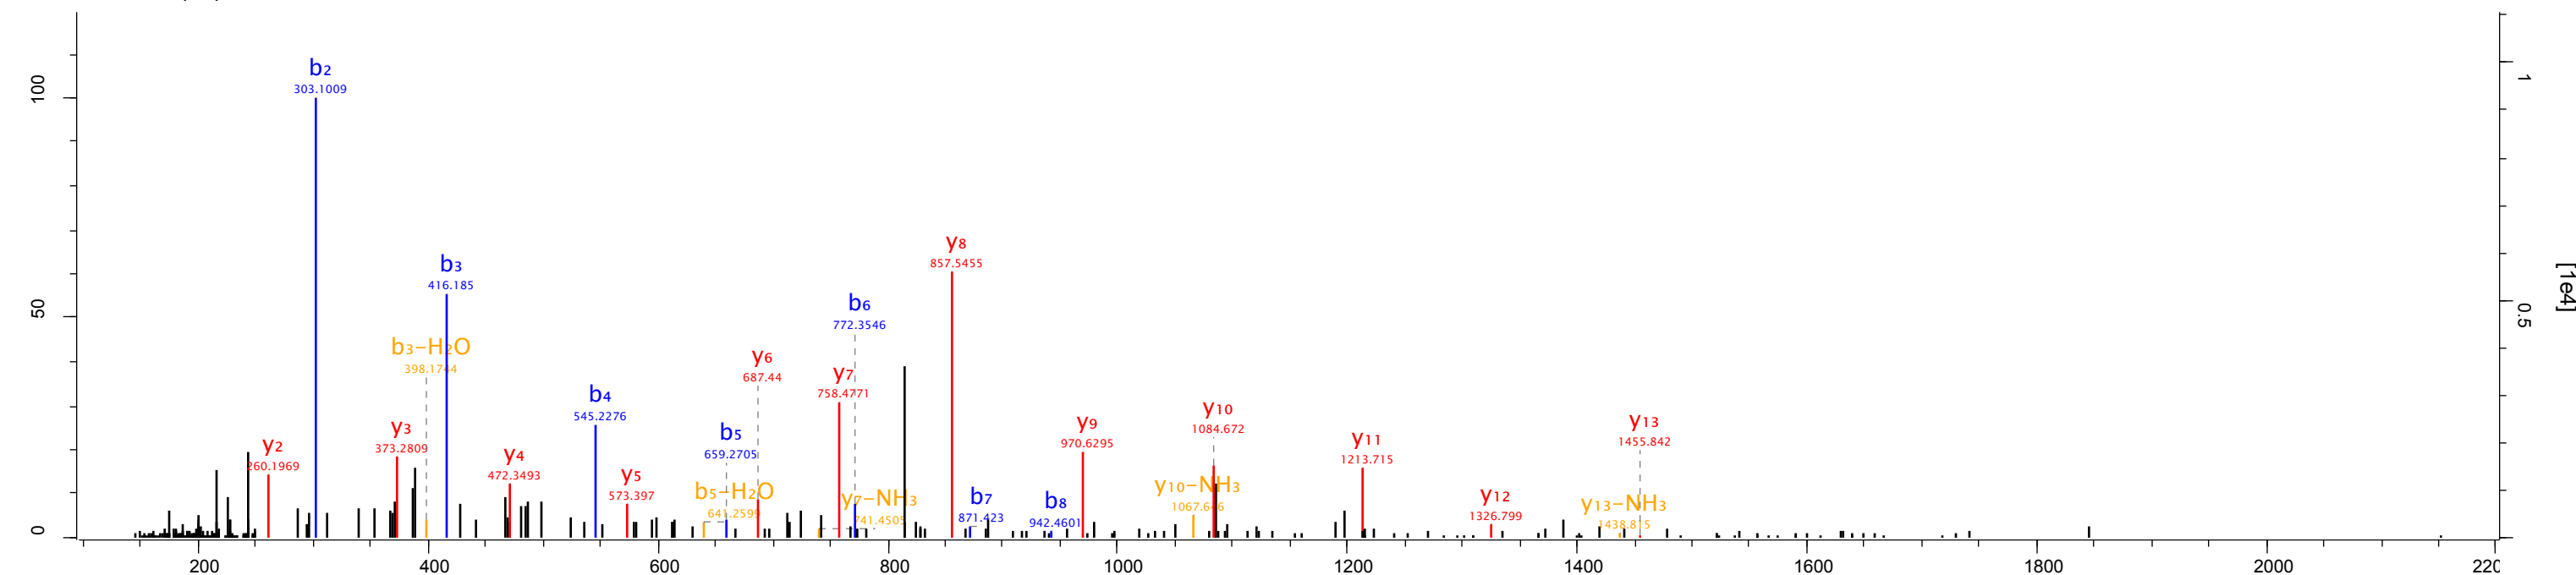

ac  
- M E L E N I V A N T V L L K -  
b<sub>2</sub> b<sub>3</sub> b<sub>4</sub> b<sub>5</sub> b<sub>6</sub> b<sub>7</sub> b<sub>8</sub> y<sub>13</sub> y<sub>12</sub> y<sub>11</sub> y<sub>10</sub> y<sub>9</sub> y<sub>8</sub> y<sub>7</sub> y<sub>6</sub> y<sub>5</sub> y<sub>4</sub> y<sub>3</sub> y<sub>2</sub>

Raw file  
20150307\_MEF3\_Top\_opt\_E3\_01\_1681

Scan 10911 Method TOF; CID Score 58.7 m/z 406.21 Gene names Lrrcc1

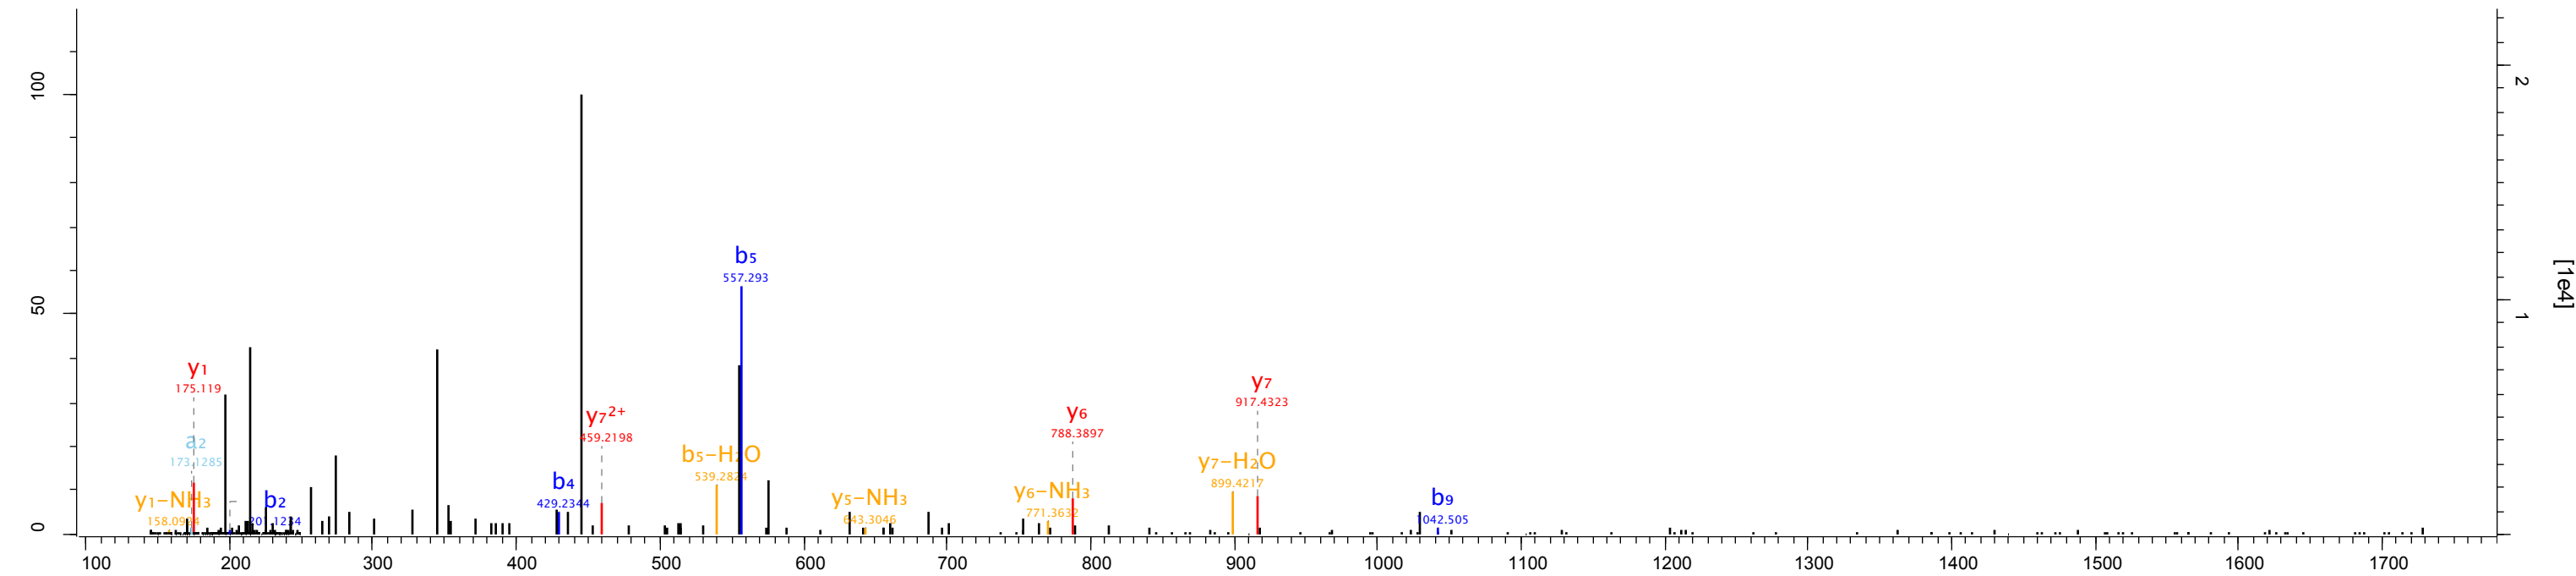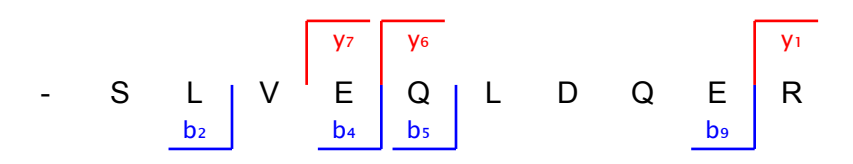



Raw file  
20150307\_MEF3\_Top\_opt\_E3\_01\_1681

Scan 12589 Method TOF; CID Score 83.87 m/z 407.2 Gene names Tmed3

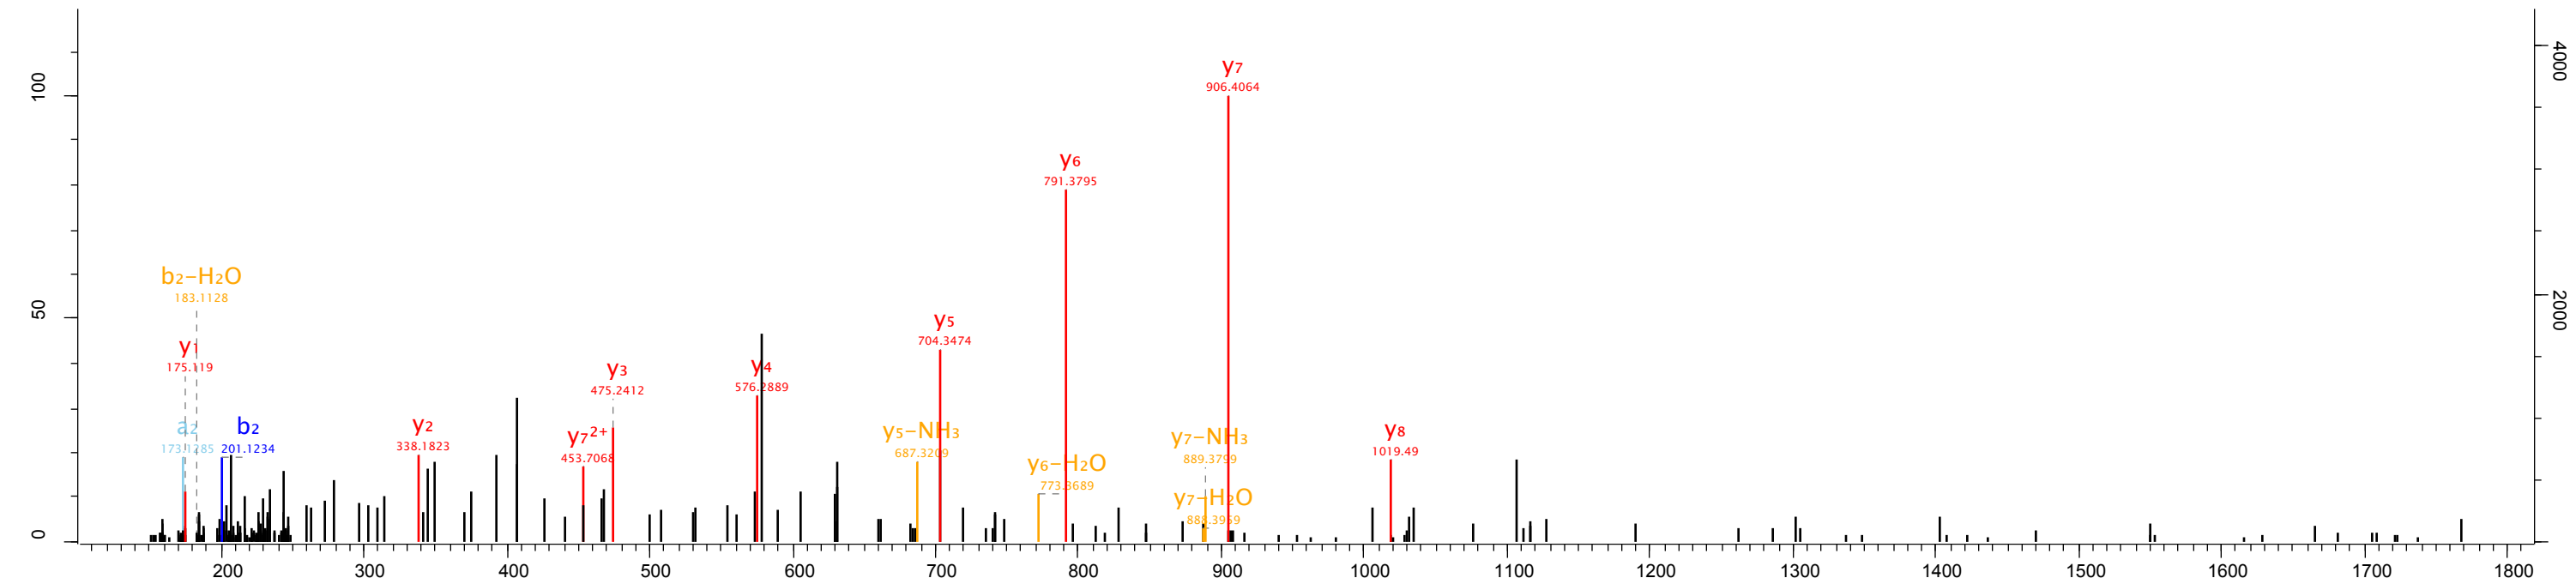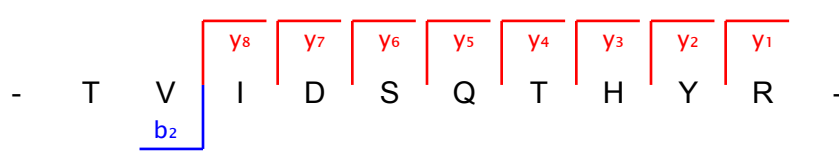

Raw file 20150307\_MEF3\_Top\_opt\_E3\_01\_1681 Scan 16487 Method TOF; CID Score 49.3 m/z 609.92 Gene names Gpr55

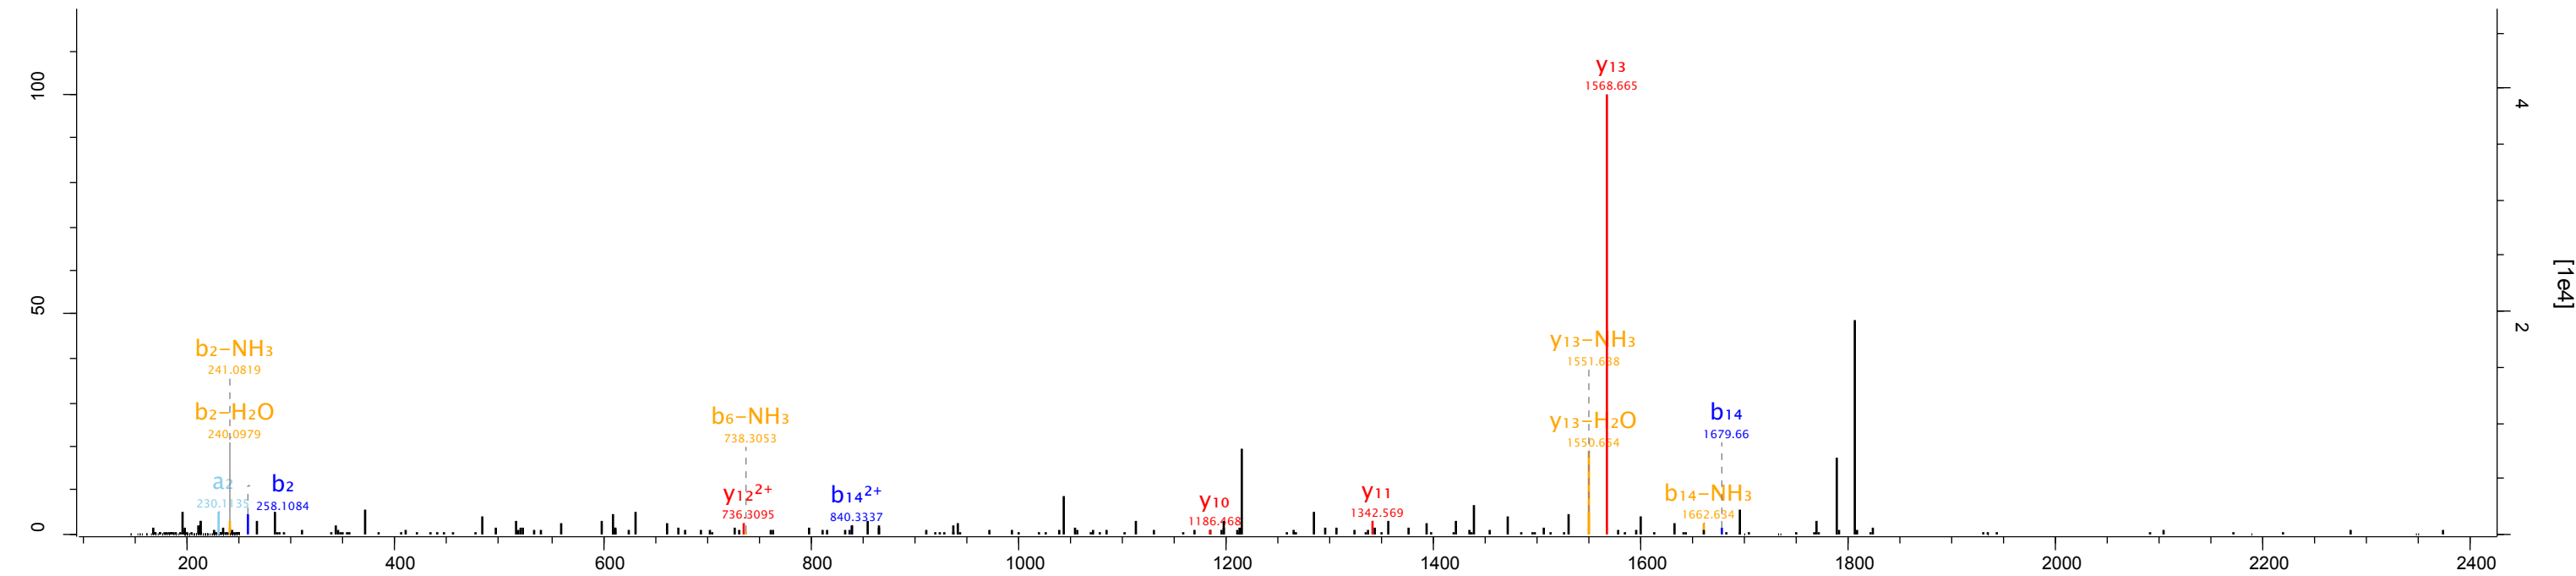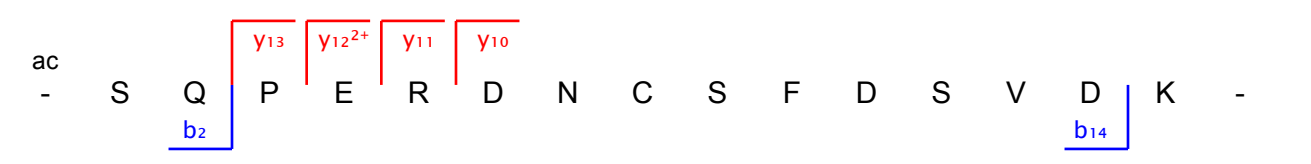

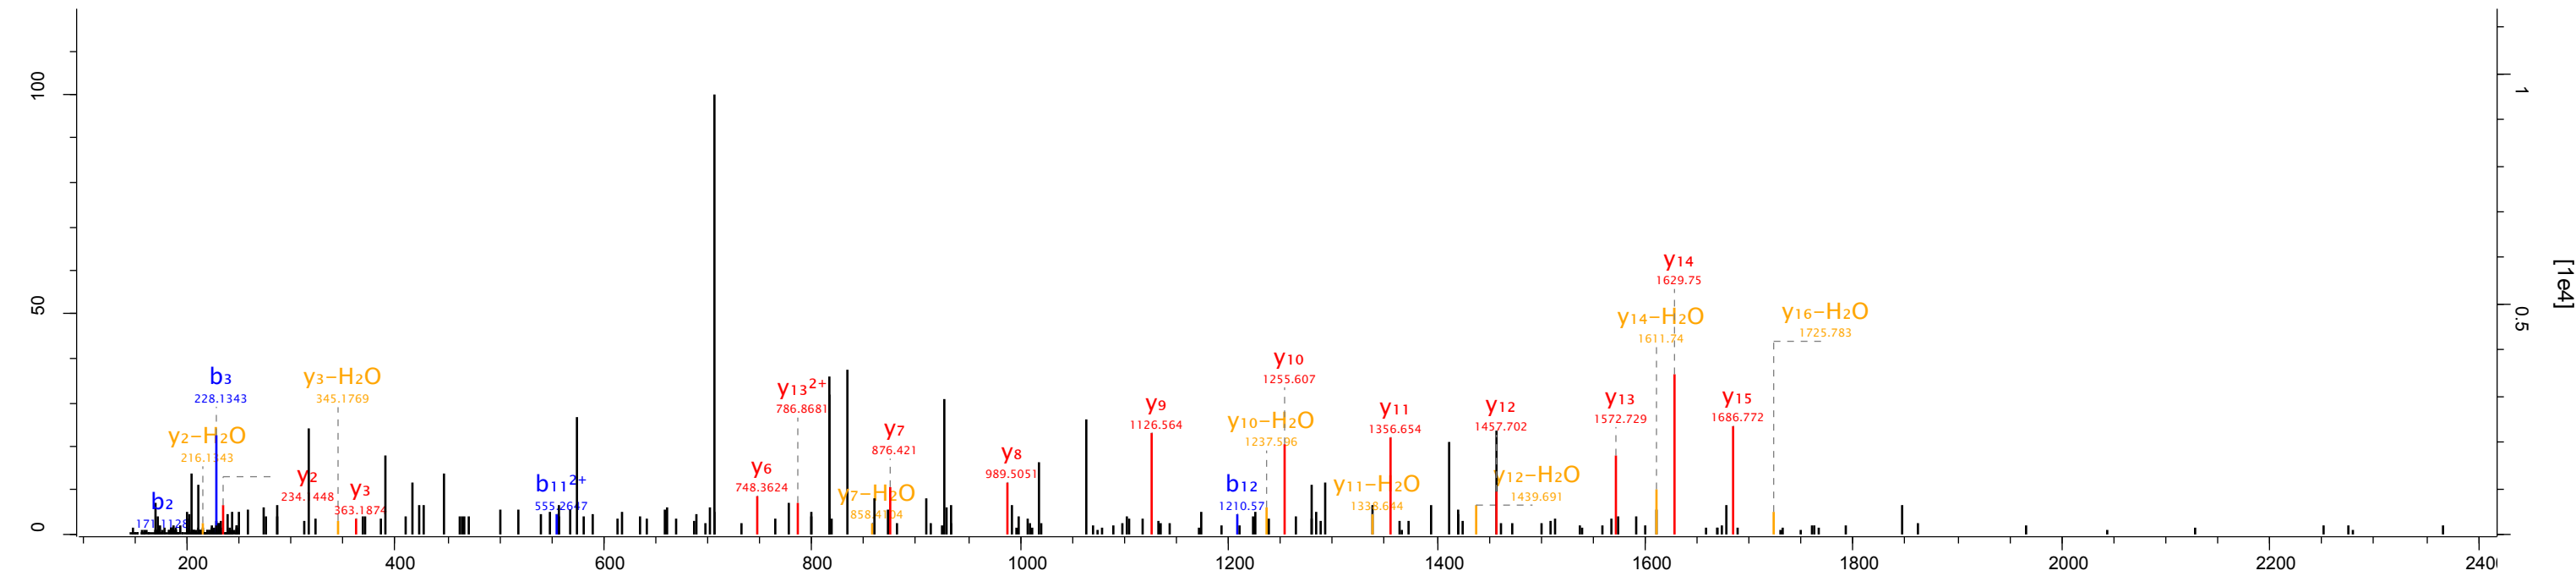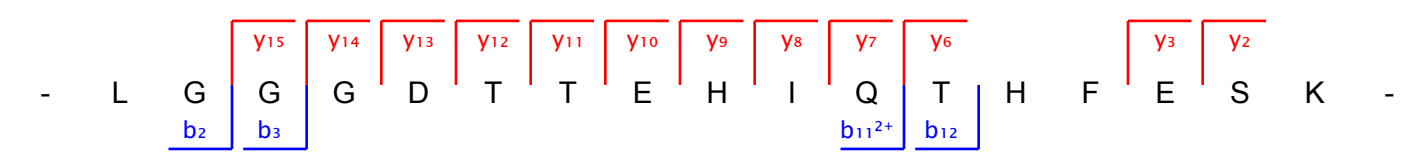

Raw file  
20150307\_MEF3\_Top\_opt\_E3\_01\_1681

Scan 25118 Method TOF; CID Score 46.25 m/z 642.36 Gene names Tfp4

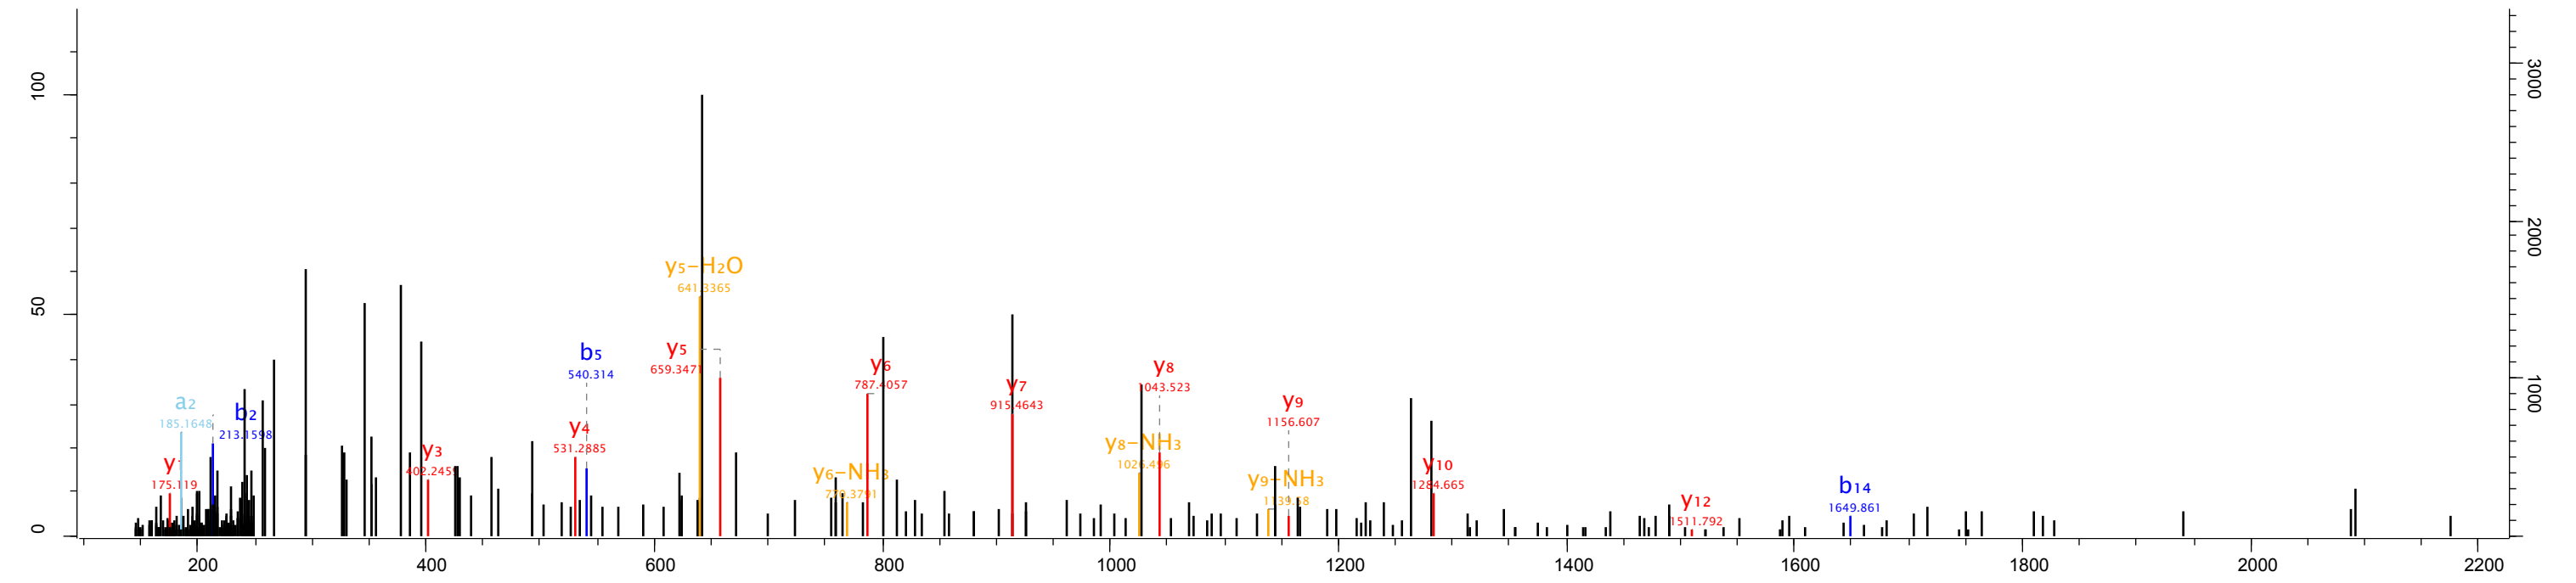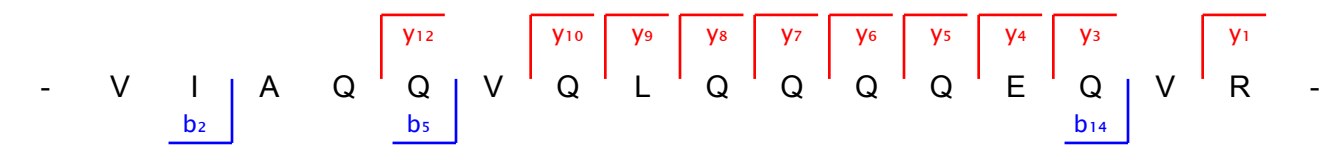

Raw file 20150307\_MEF3\_Top\_opt\_E3\_01\_1681 Scan 50096 Method TOF; CID Score 45.28 m/z 981.95 Gene names Cdc42se2

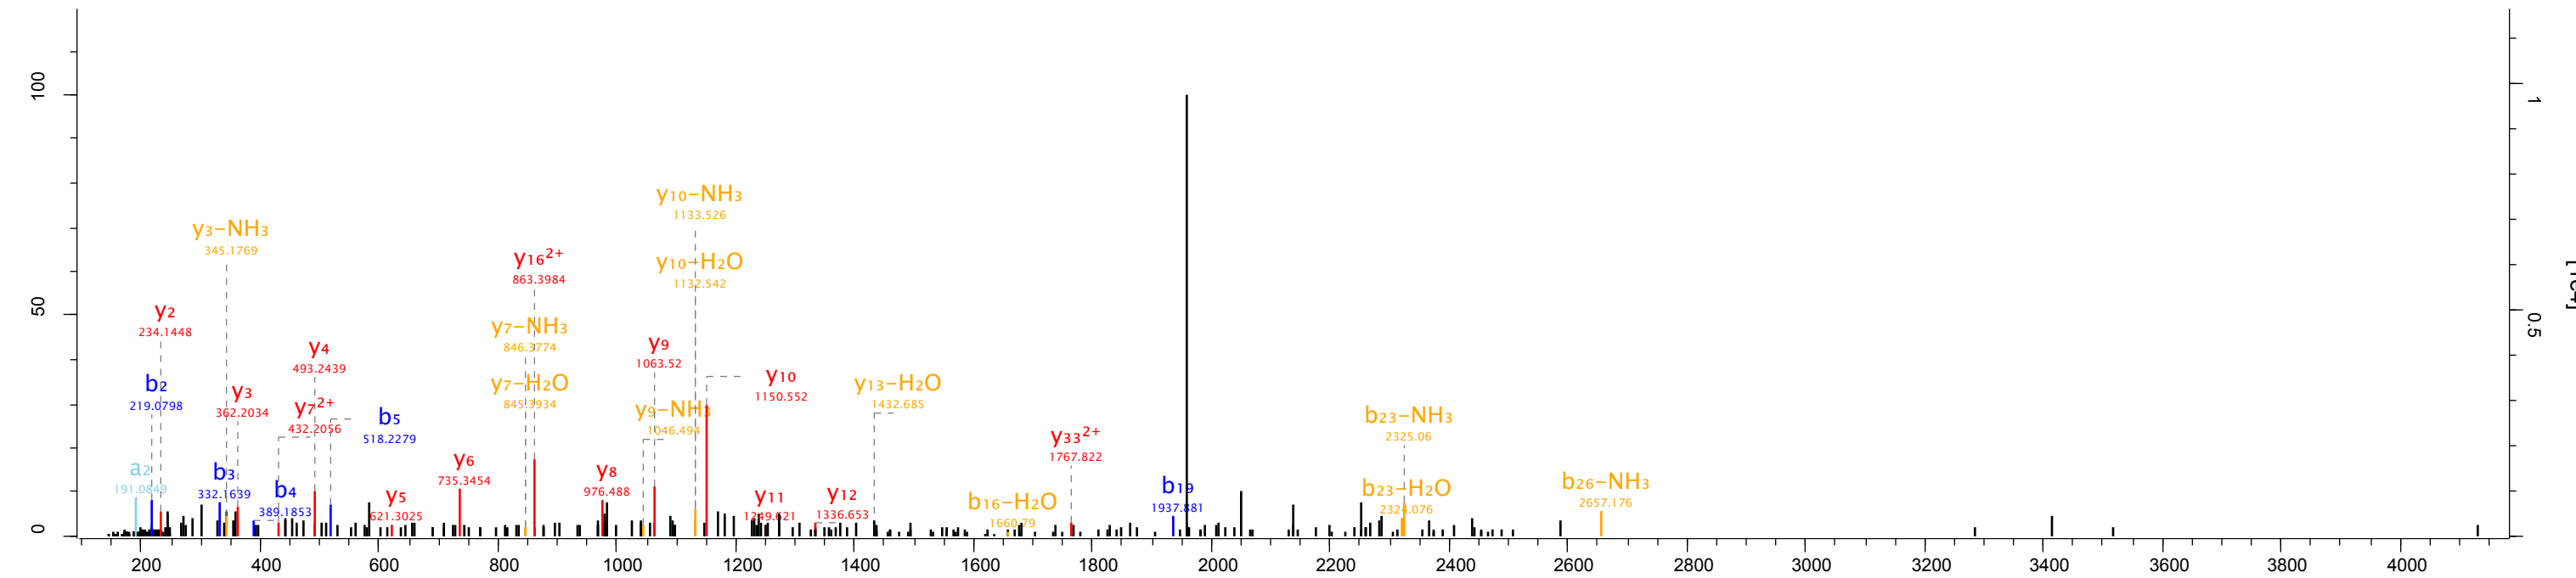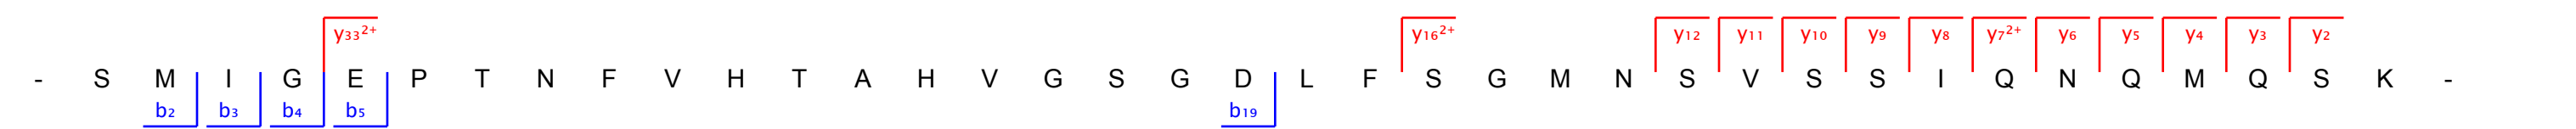

Raw file 20150307\_MEF3\_Top\_opt\_E3\_01\_1681 Scan 58007 Method TOF; CID Score 31.17 m/z 730.36 Gene names Med16

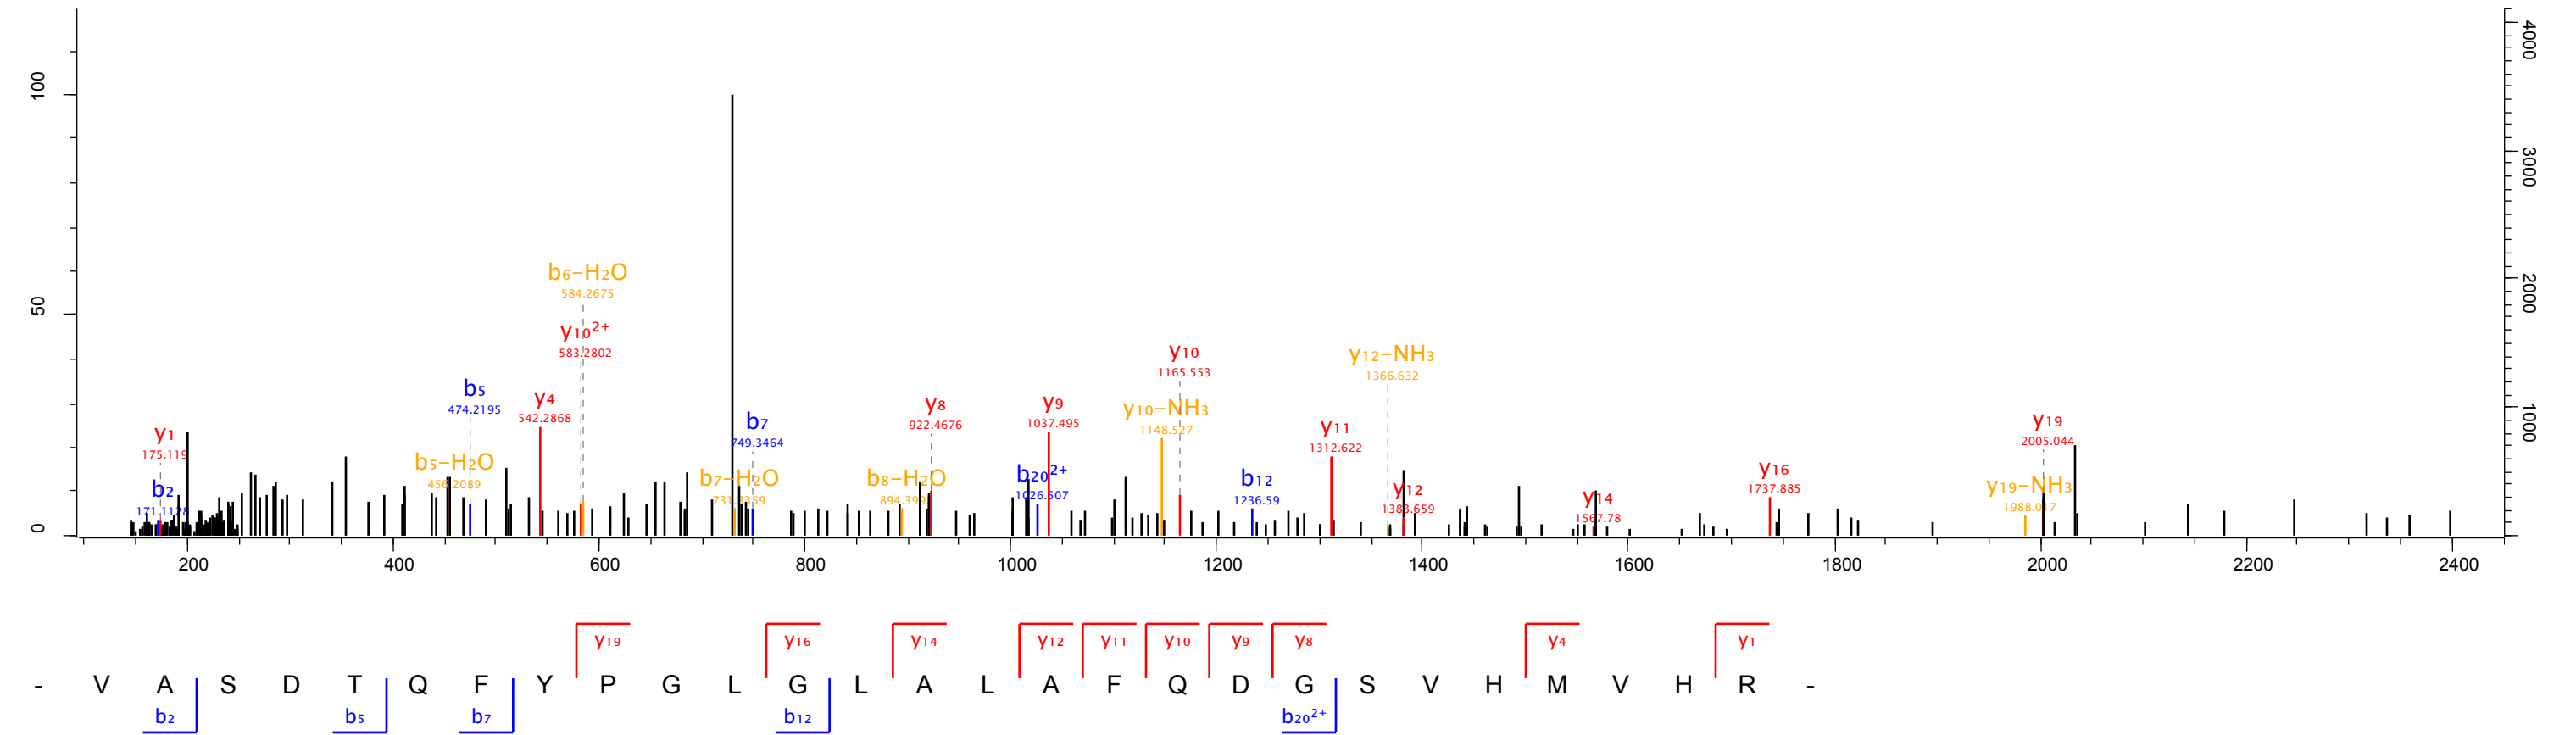

Raw file 20150307\_MEF3\_Top\_opt\_E3\_01\_1690 Scan 13882 Method TOF; CID Score 69.26 m/z 666.81 Gene names Tmf1

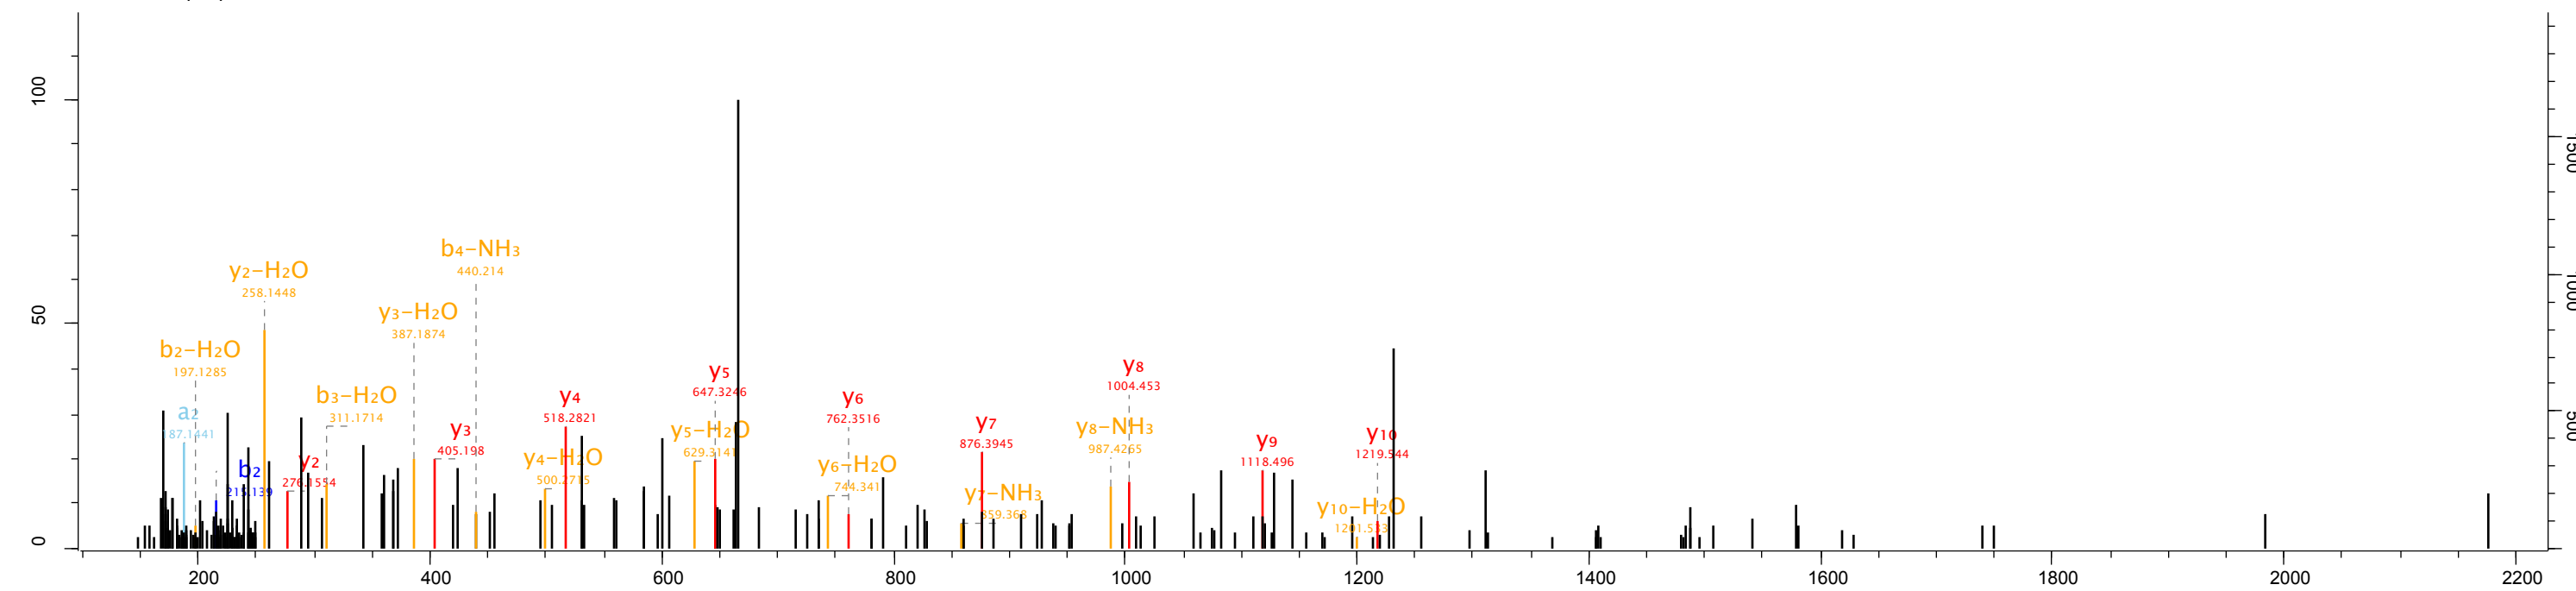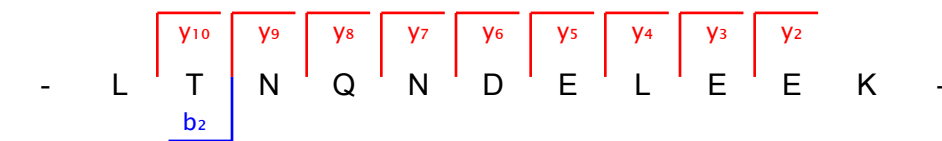

Raw file  
20150307\_MEF3\_Top\_opt\_E3\_01\_1690

Scan 25122 Method TOF; CID Score 68 m/z 696.33 Gene names Mmp2

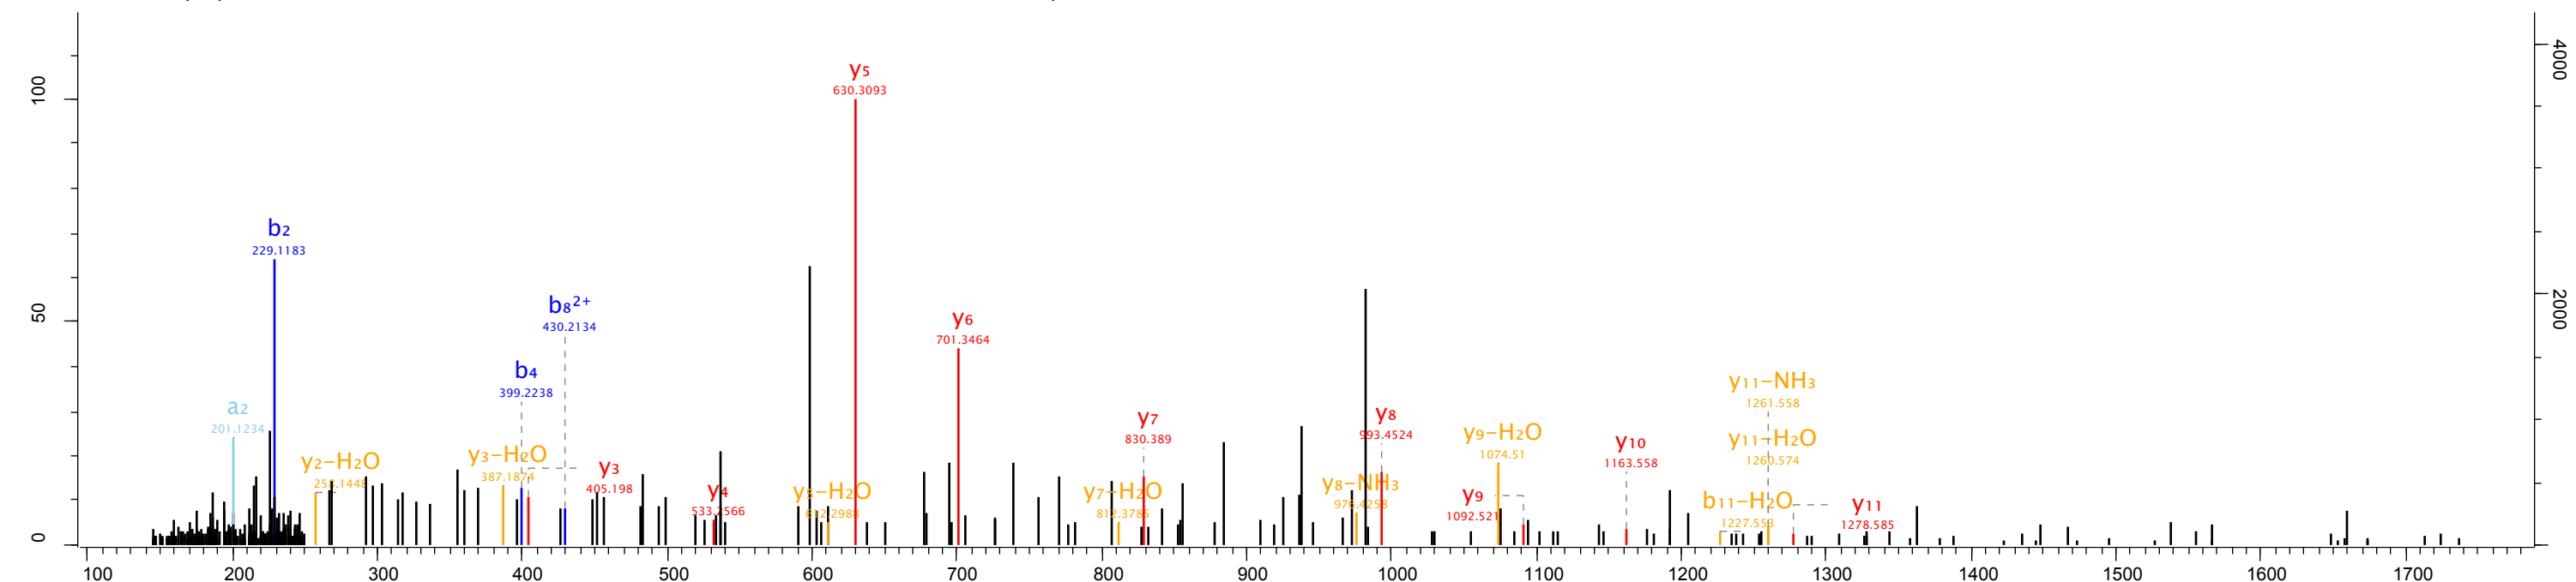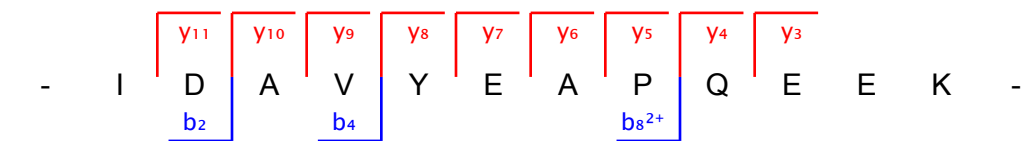



Raw file  
20150307\_MEF3\_Top\_opt\_E3\_01\_1690

Scan 27887 Method TOF; CID Score 78.33 m/z 791.37 Gene names Sumf1

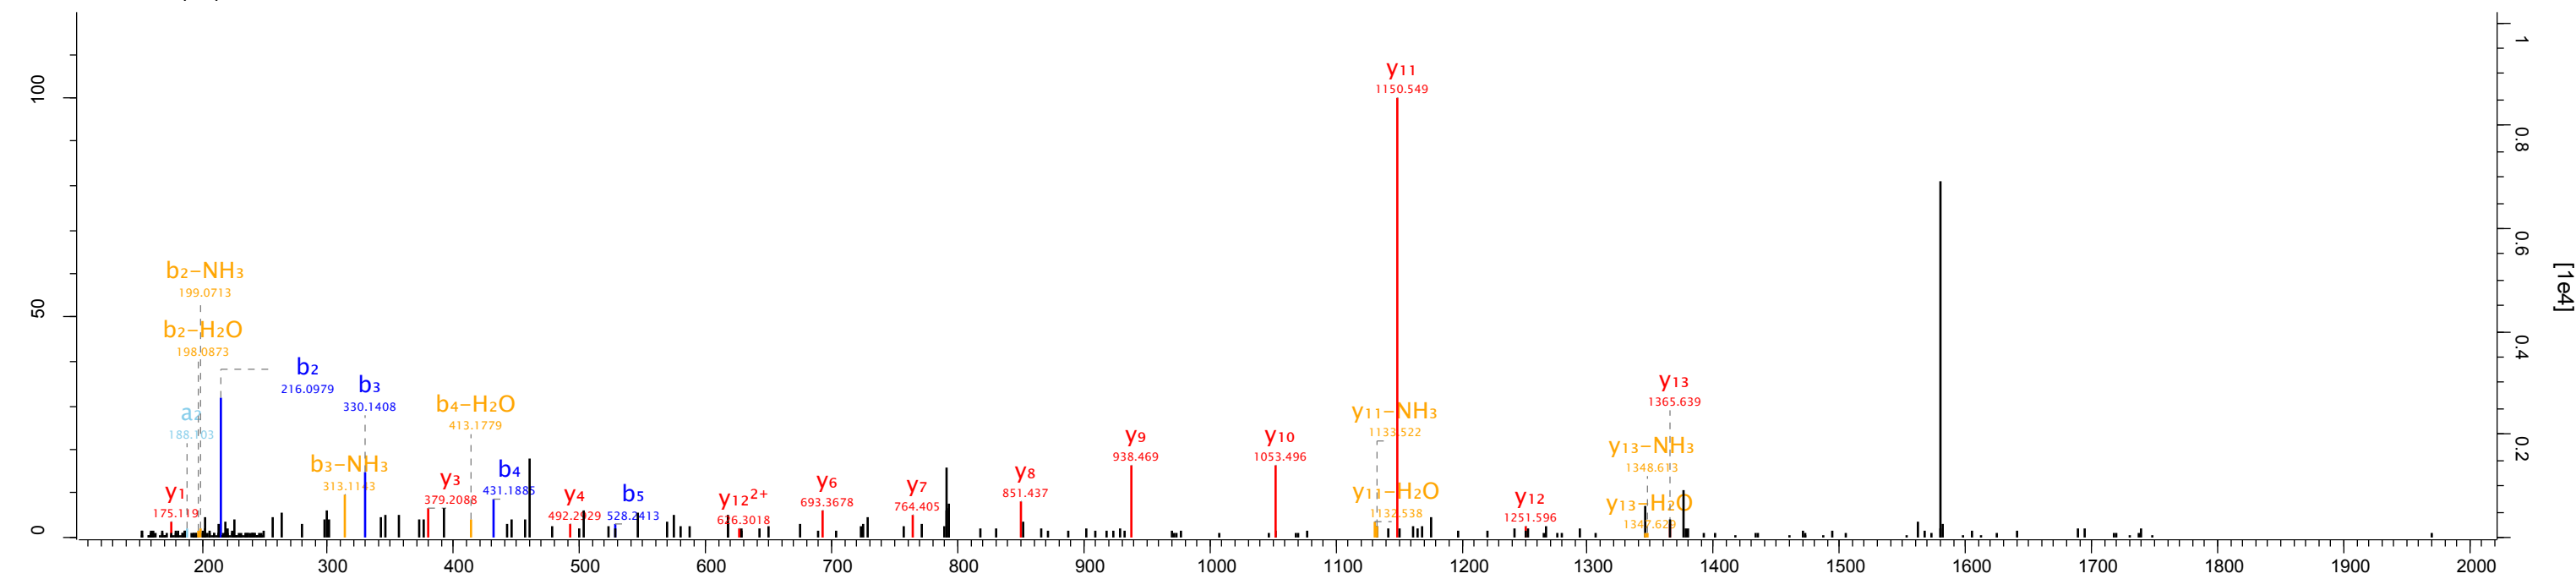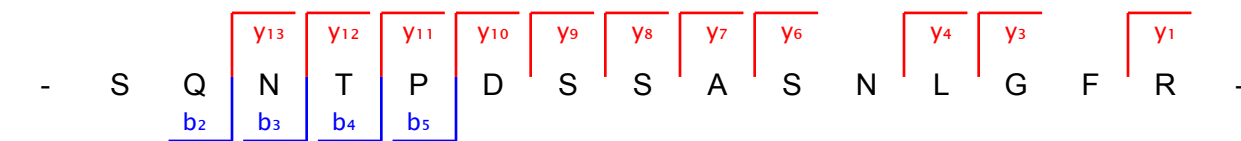

Raw file 20150307\_MEF3\_Top\_opt\_E3\_01\_1690 Scan 35500 Method TOF; CID Score 73.5 m/z 404.22 Gene names Orc6

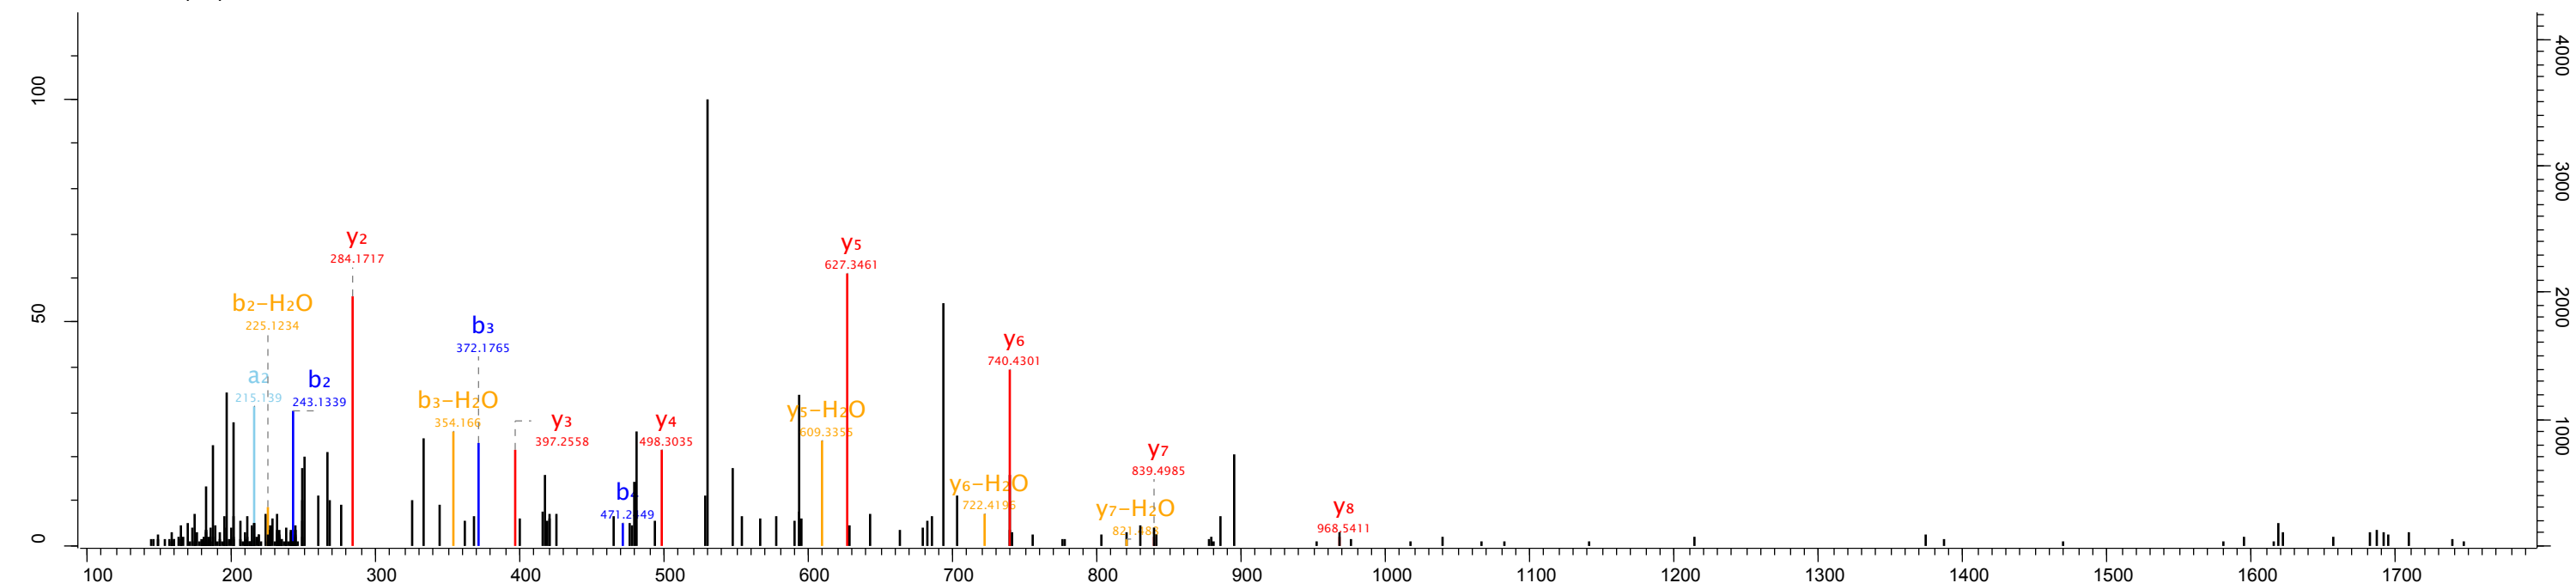

- E I E V I E T L H K -  
b<sub>2</sub> b<sub>3</sub> b<sub>4</sub> y<sub>8</sub> y<sub>7</sub> y<sub>6</sub> y<sub>5</sub> y<sub>4</sub> y<sub>3</sub> y<sub>2</sub>

Raw file  
20150307\_MEF3\_Top\_opt\_E3\_01\_1690

Scan 36627 Method TOF; CID Score 68.66 m/z 602.32 Gene names Rnf180

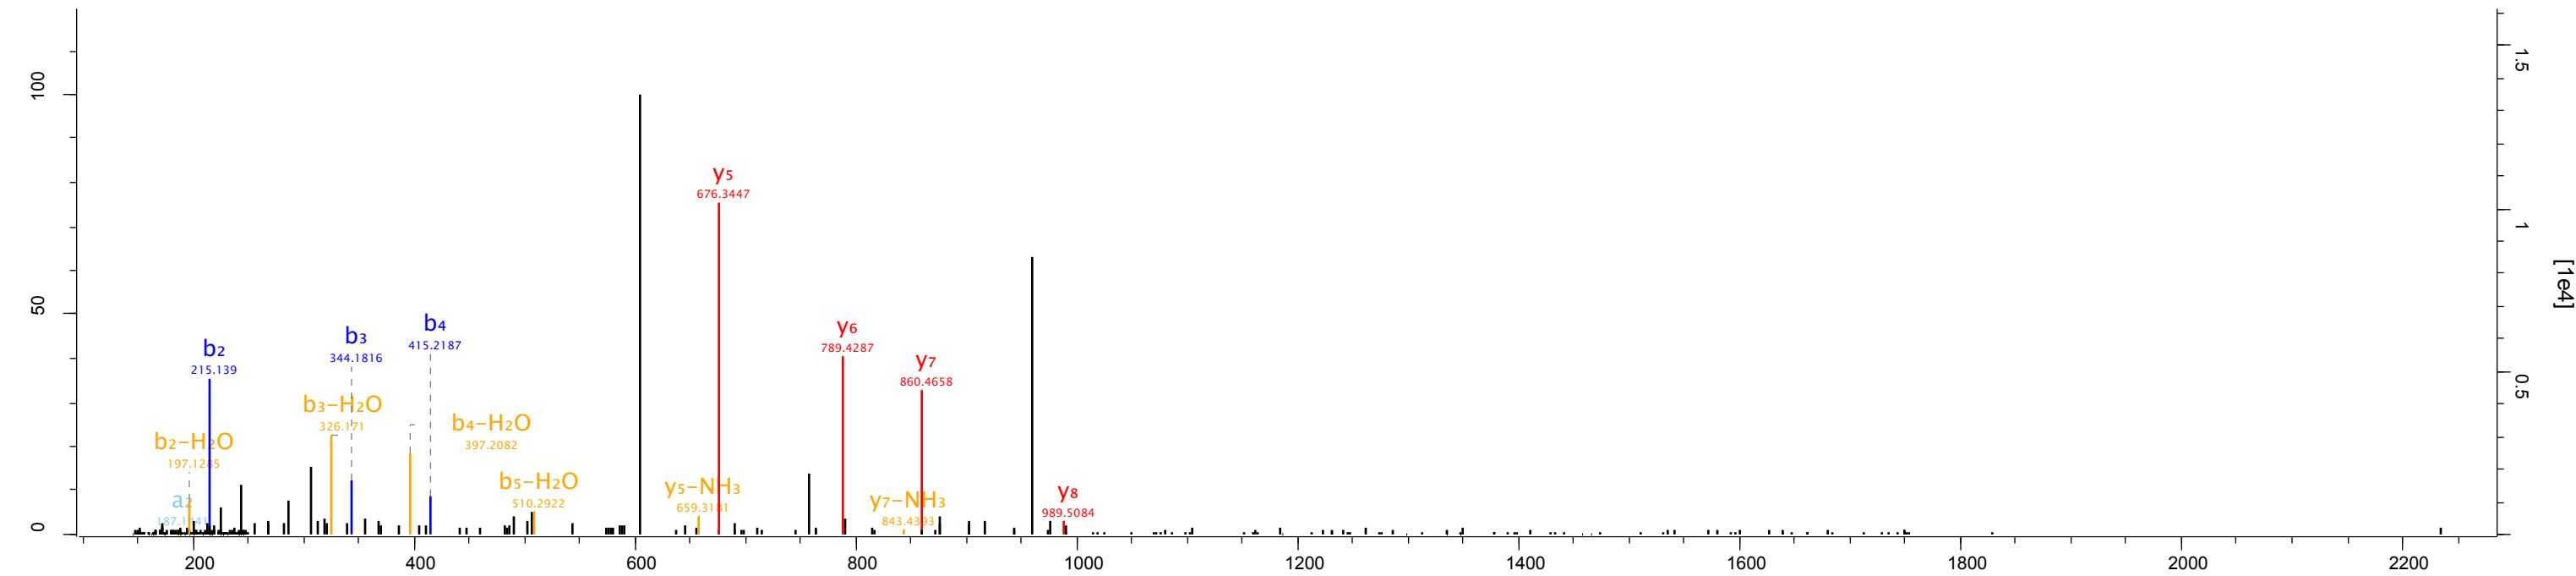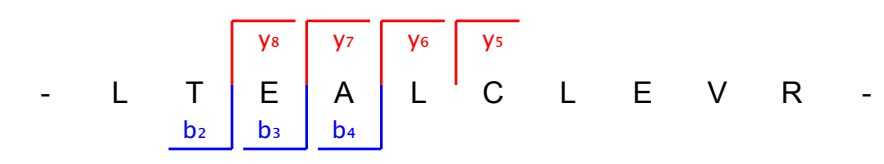

Raw file 20150307\_MEF3\_Top\_opt\_E3\_01\_1690 Scan 37133 Method TOF; CID Score 68.22 m/z 373.87 Gene names Olfr622

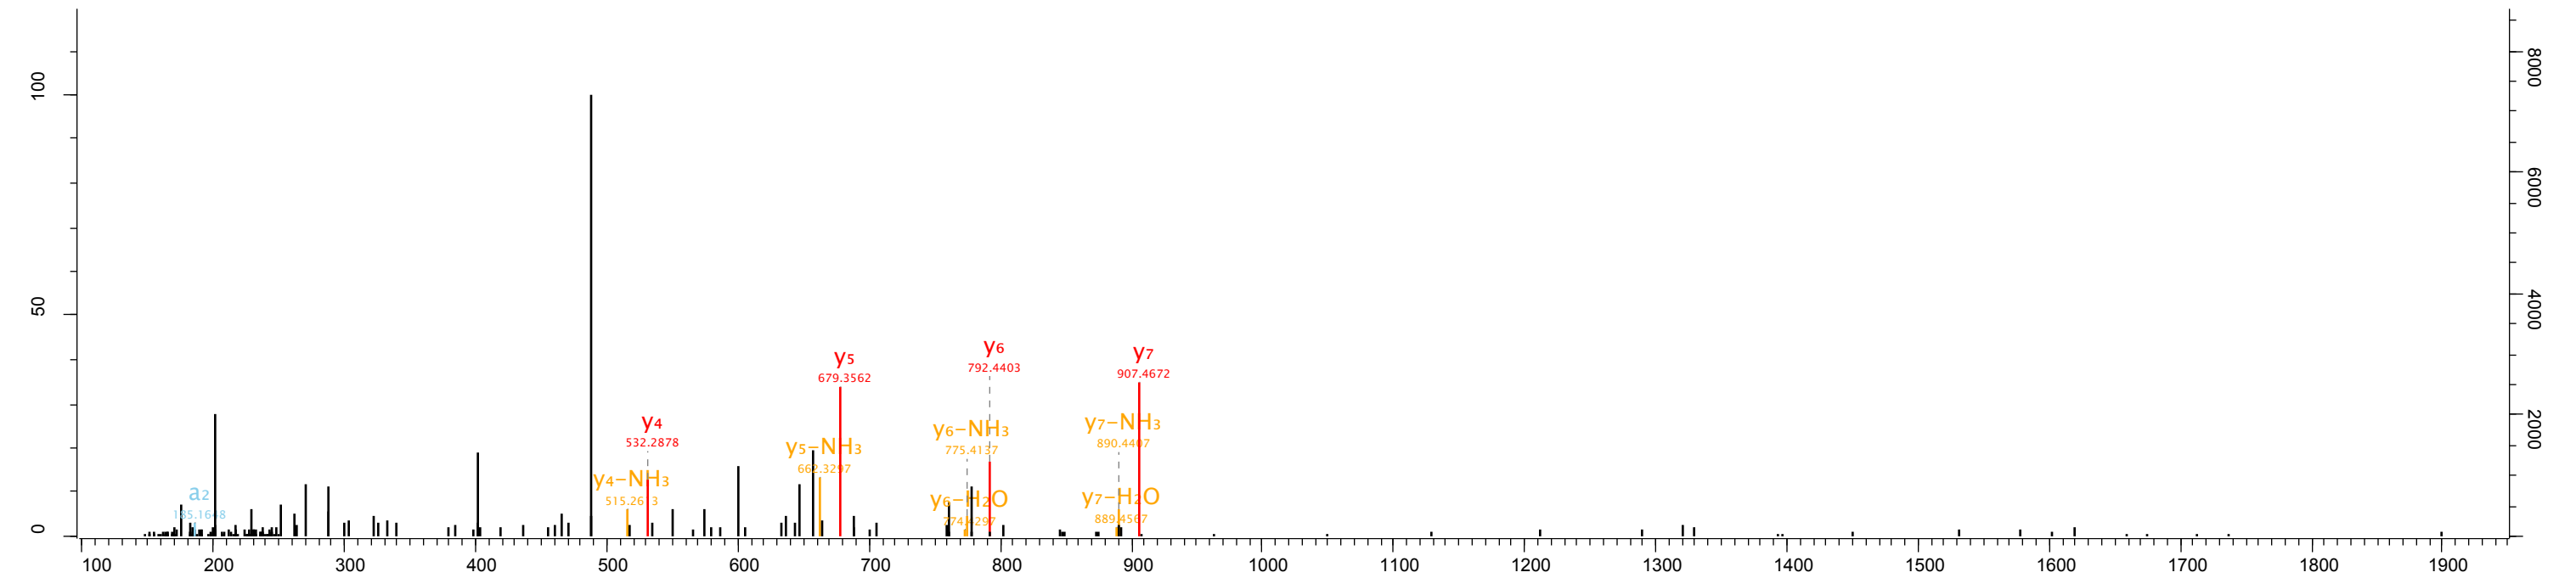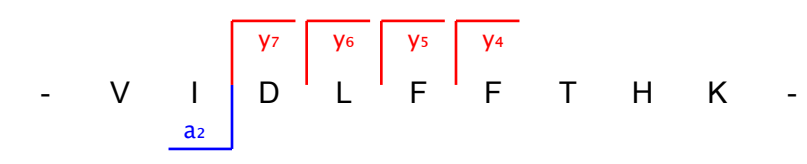

Raw file 20150307\_MEF3\_Top\_opt\_E3\_01\_1690 Scan 37917 Method TOF; CID Score 53.3 m/z 688.36 Gene names Kifap3

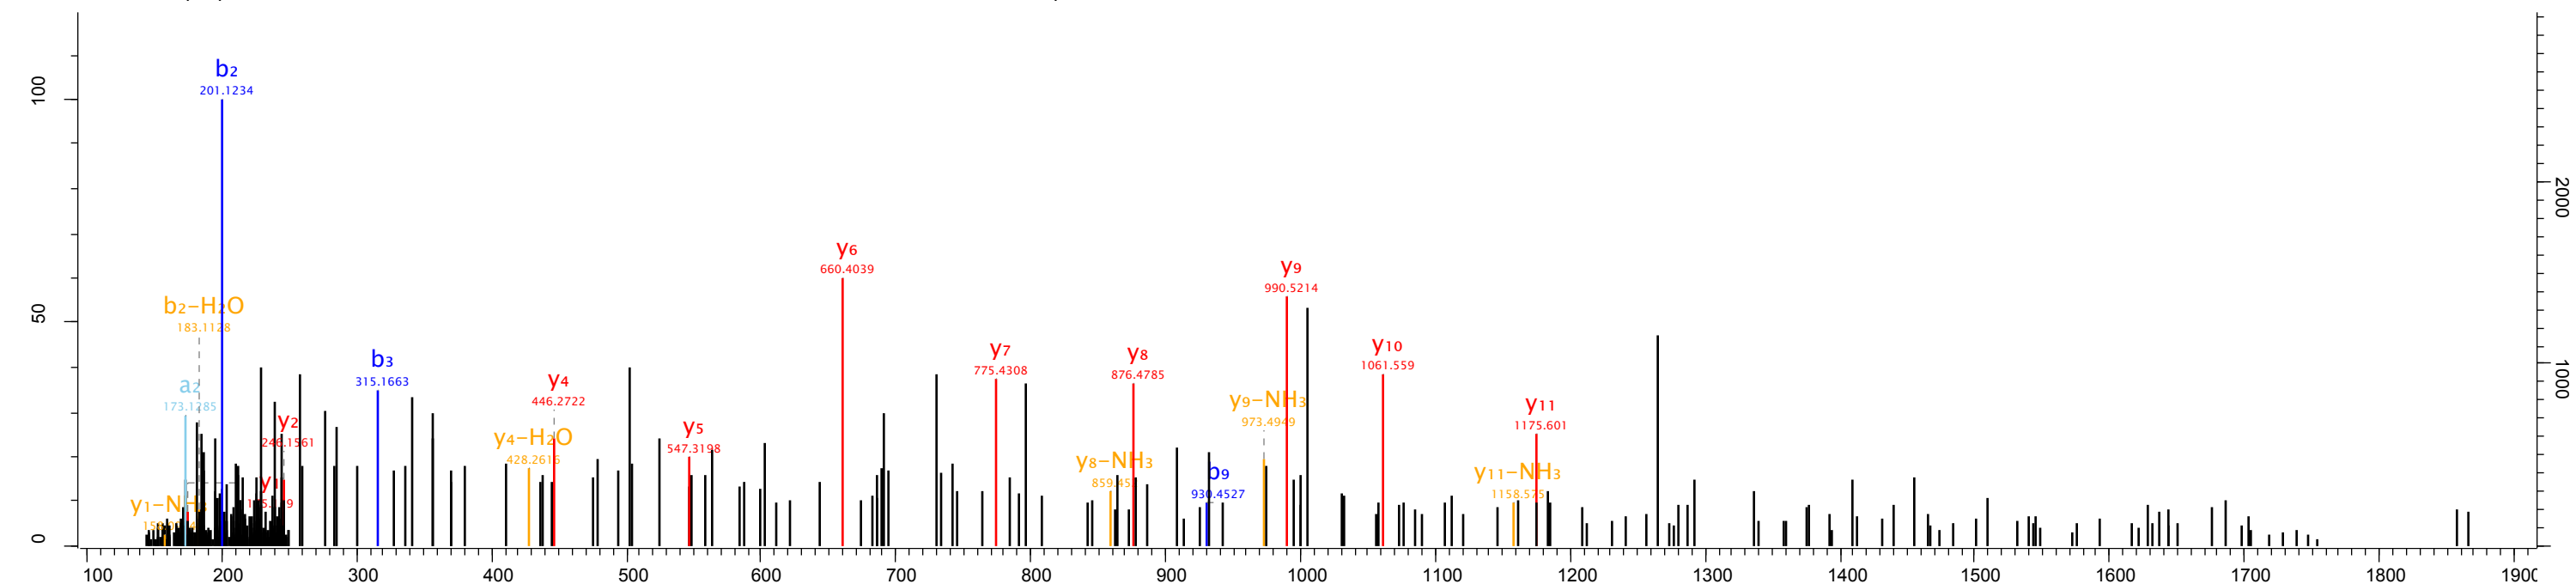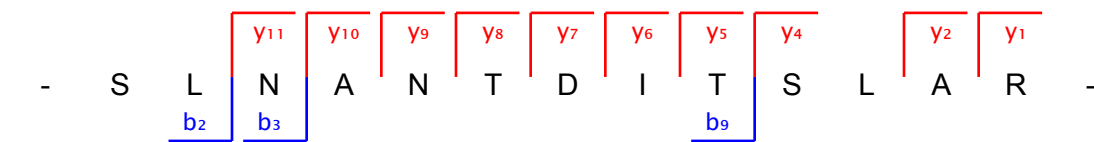

Raw file  
20150307\_MEF3\_Top\_opt\_E3\_01\_1690

Scan 47348 Method TOF; CID Score 102.08 m/z 623 Gene names Rcbtb2

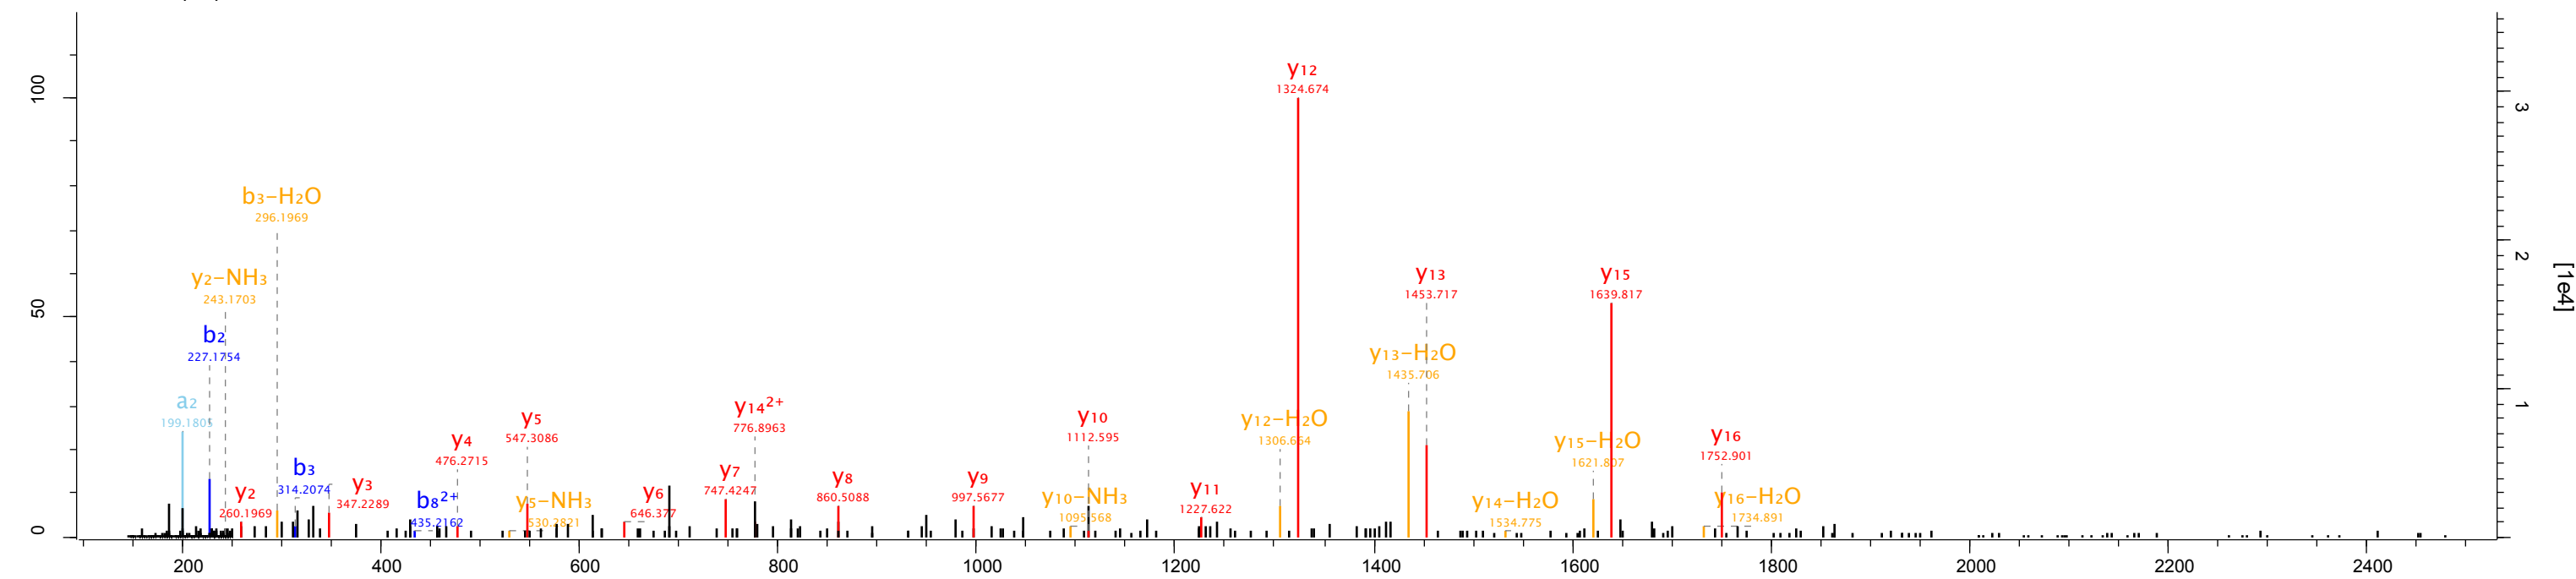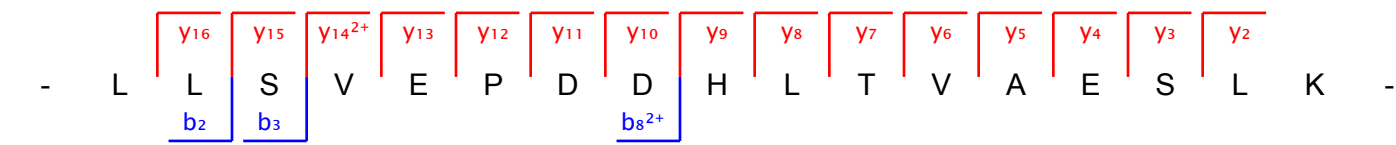

Raw file 20150307\_MEF3\_Top\_opt\_E3\_01\_1690 Scan 55704 Method TOF; CID Score 48.29 m/z 965.47 Gene names Med19

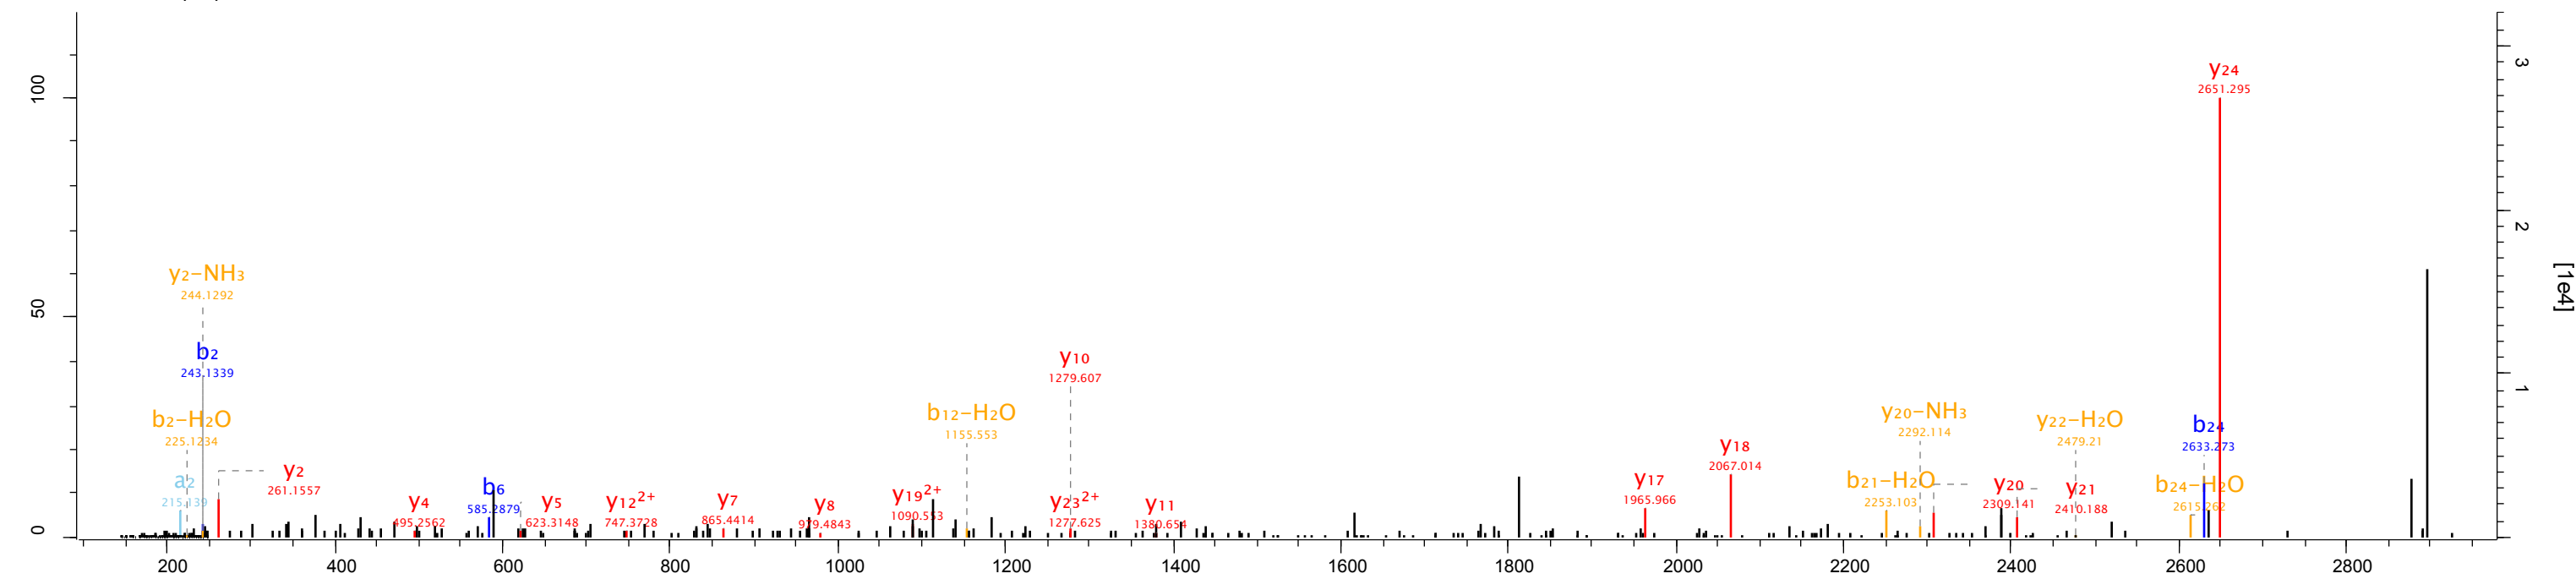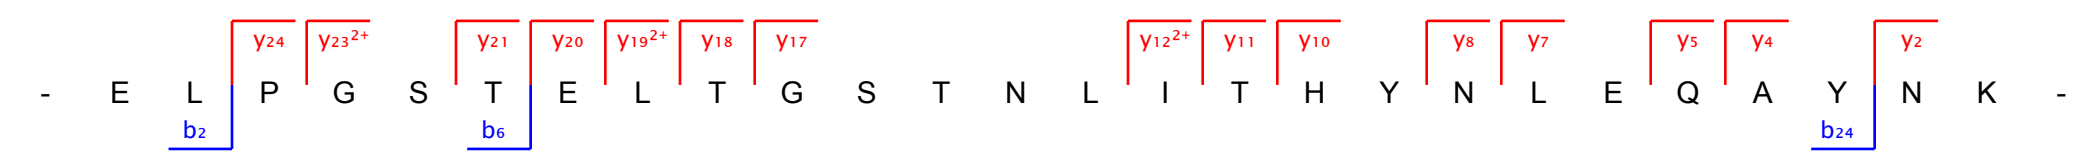

Raw file  
20150307\_MEF3\_Top\_opt\_E3\_01\_1690

Scan 55963 Method TOF; CID Score 61.34 m/z 811.77 Gene names Znrd1

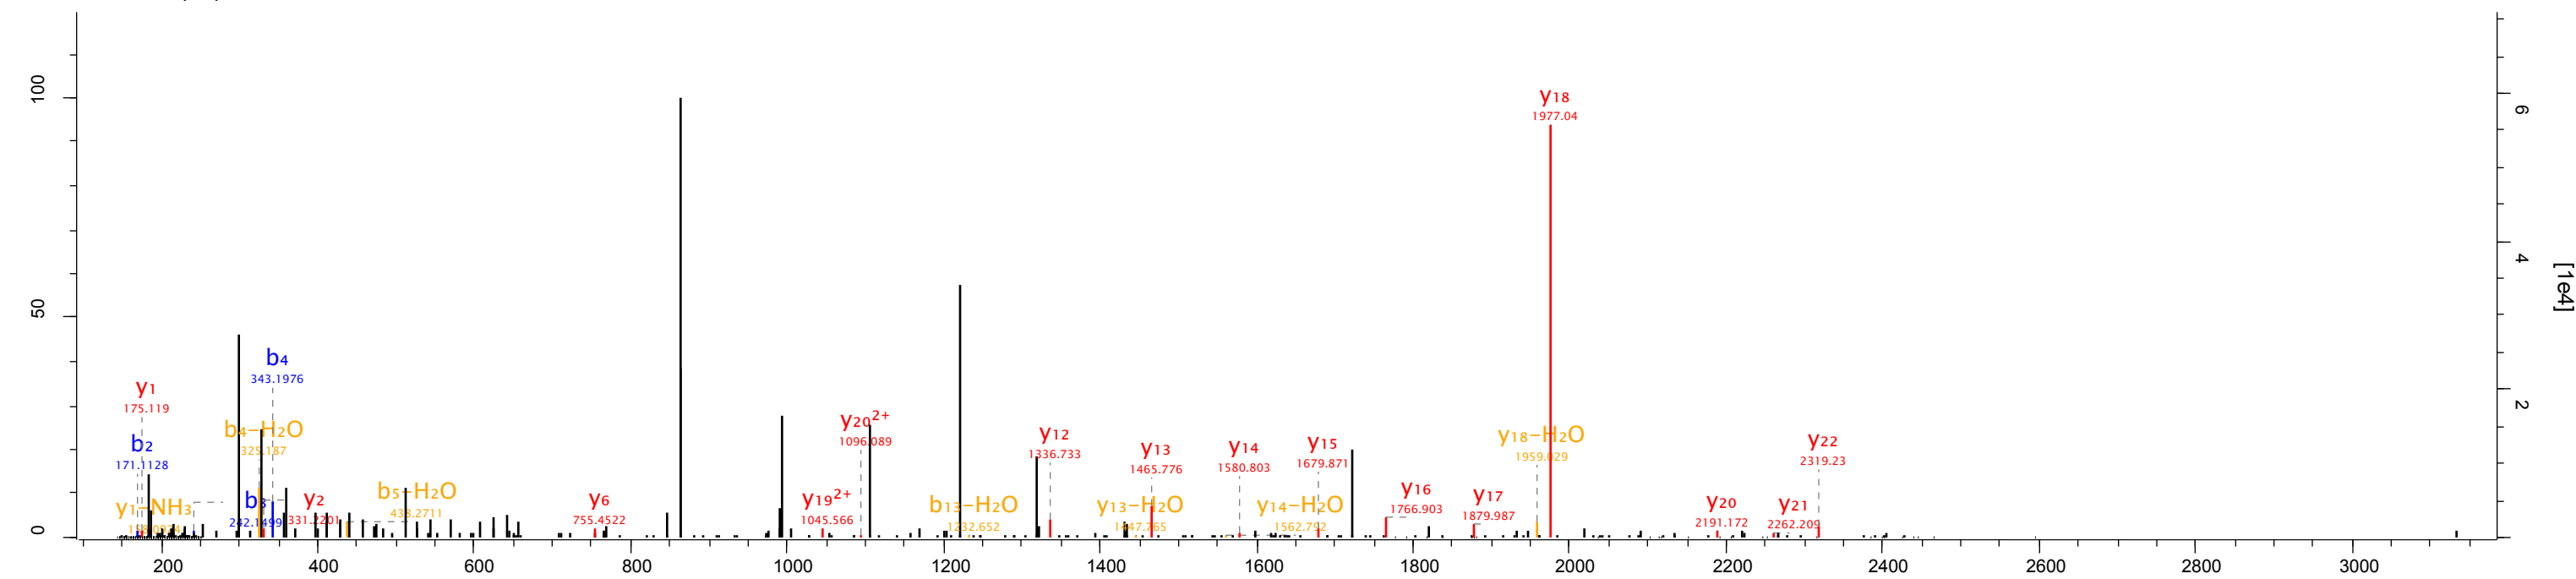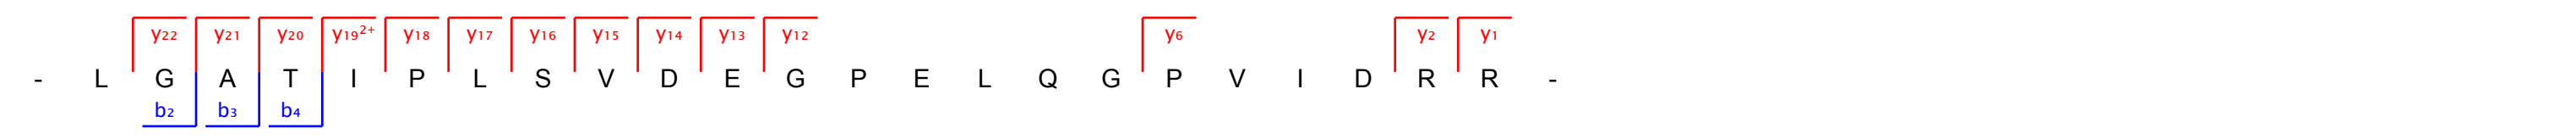



Raw file 20150307\_MEF3\_Top\_opt\_E3\_01\_1690 Scan 62757 Method TOF; CID Score 50.18 m/z 943.46 Gene names Glce

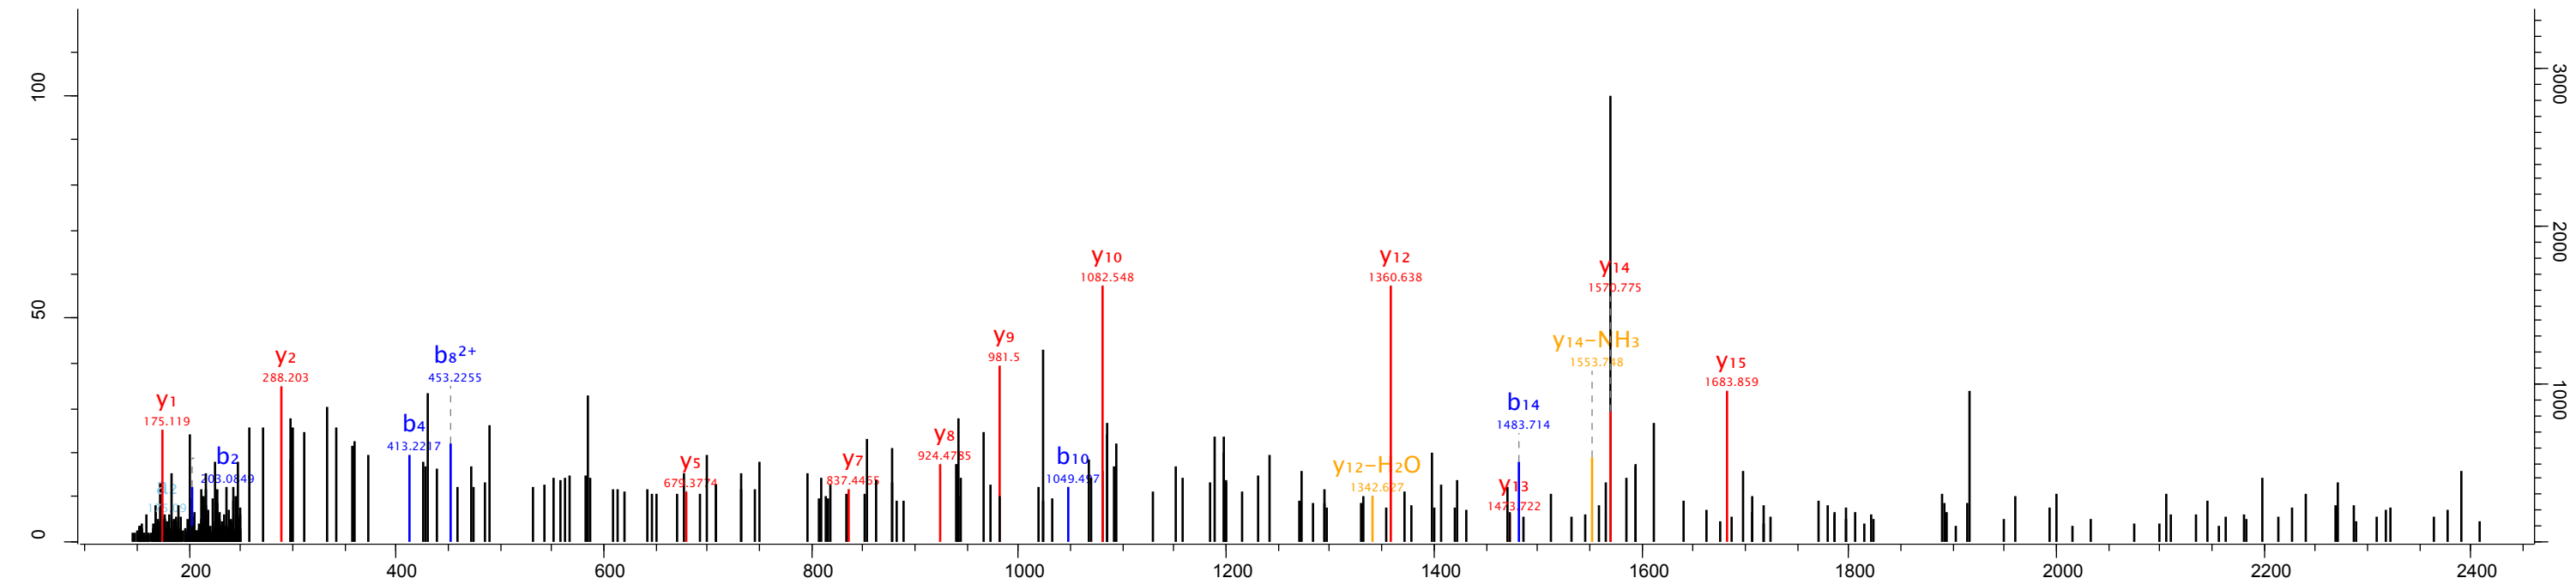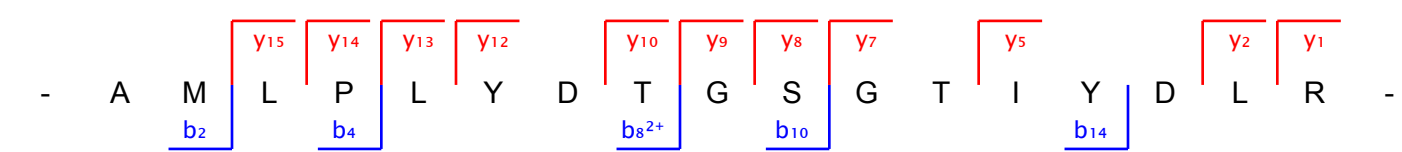

Raw file  
20150307\_MEF3\_Top\_opt\_E3\_01\_1690

Scan Method Score m/z Gene names  
64017 TOF; CID 76.21 756.37 Hoxd13

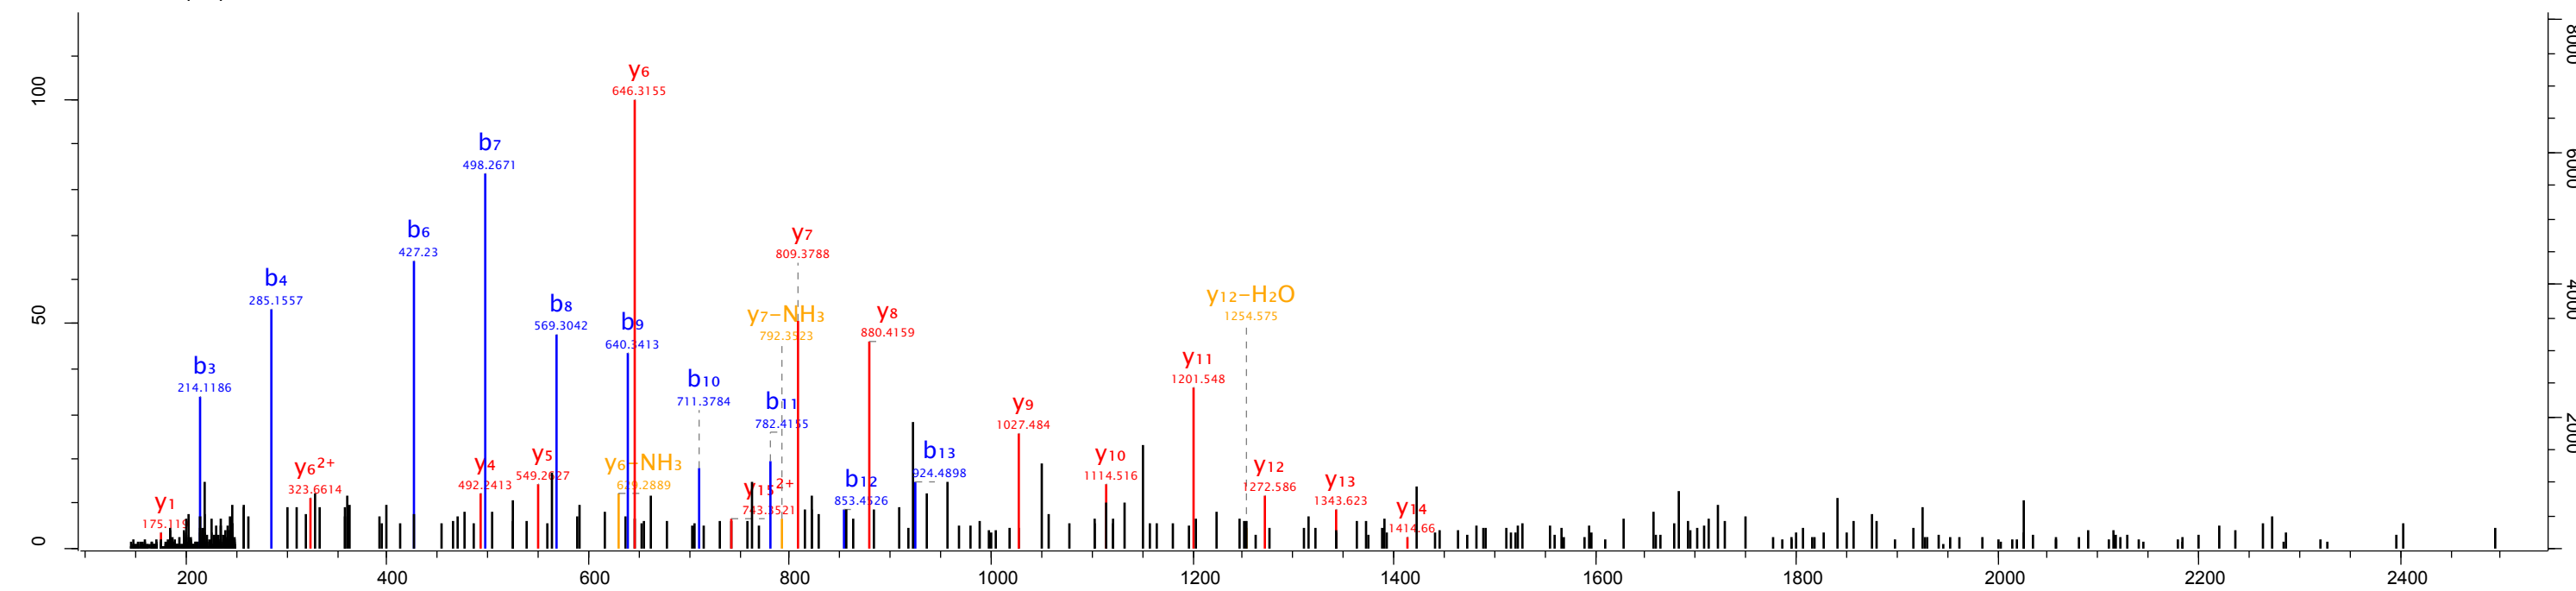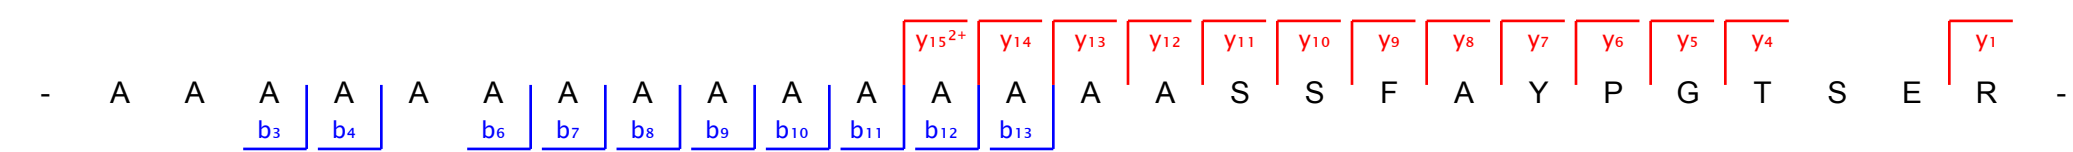

Raw file  
20150307\_NSC1\_Top\_opt\_F1\_01\_1678

Scan 6806 Method TOF; CID Score 59.71 m/z 788.83 Gene names Tceal8

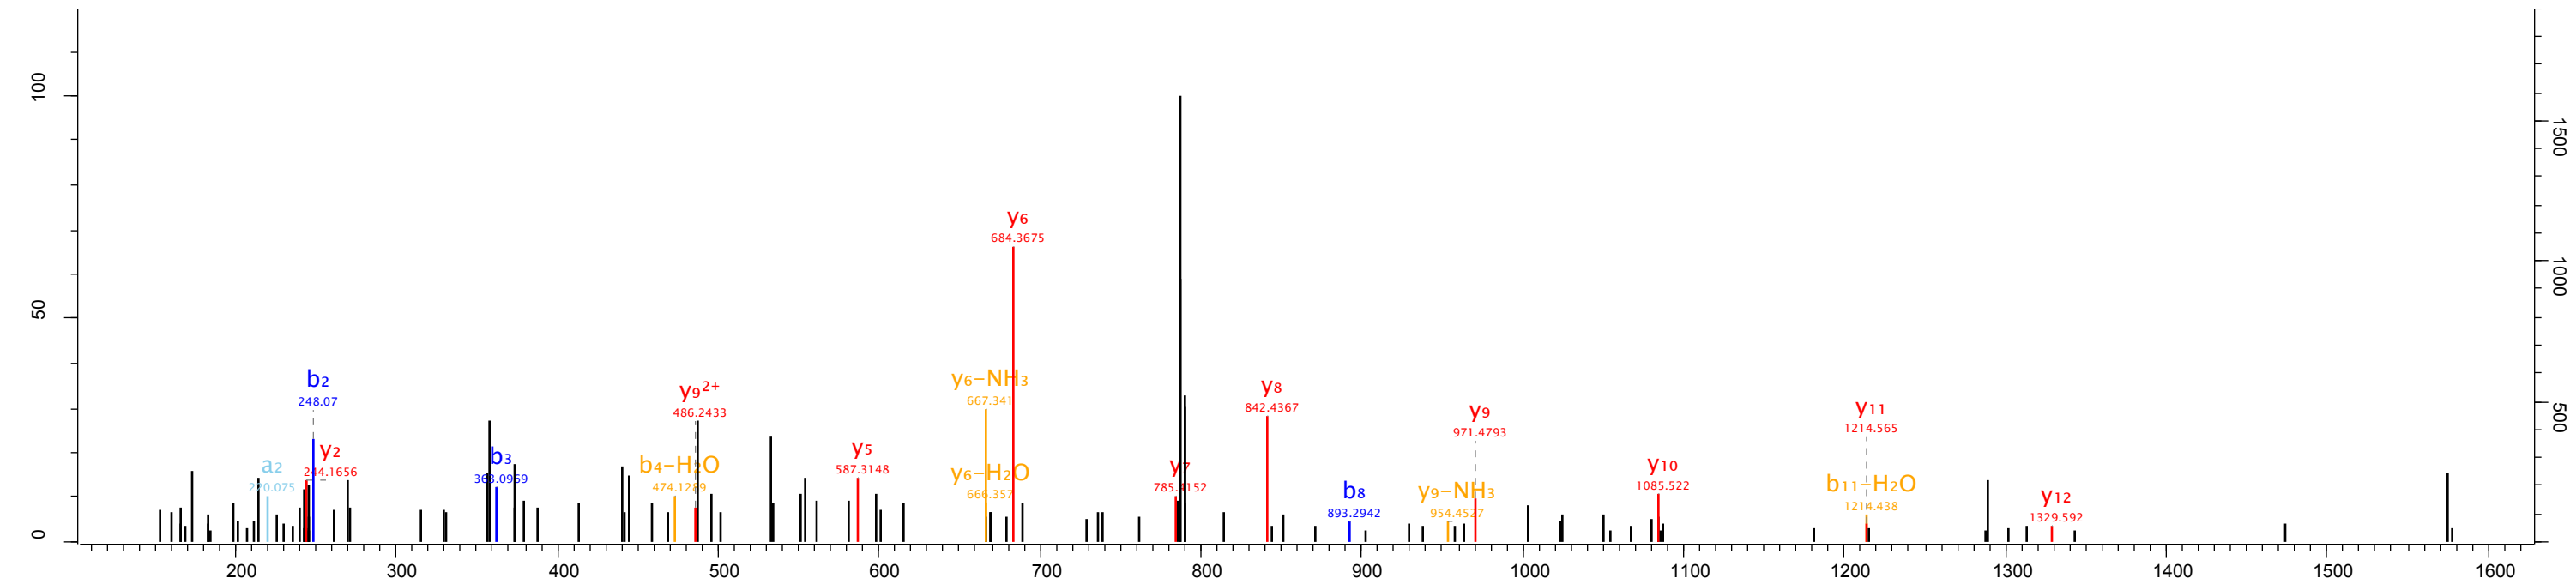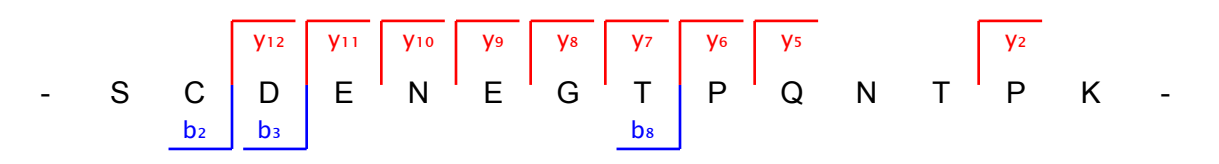

Raw file  
20150307\_NSC1\_Top\_opt\_F1\_01\_1678

Scan 9914 Method TOF; CID Score 80.44 m/z 551.78 Gene names Tdrd12

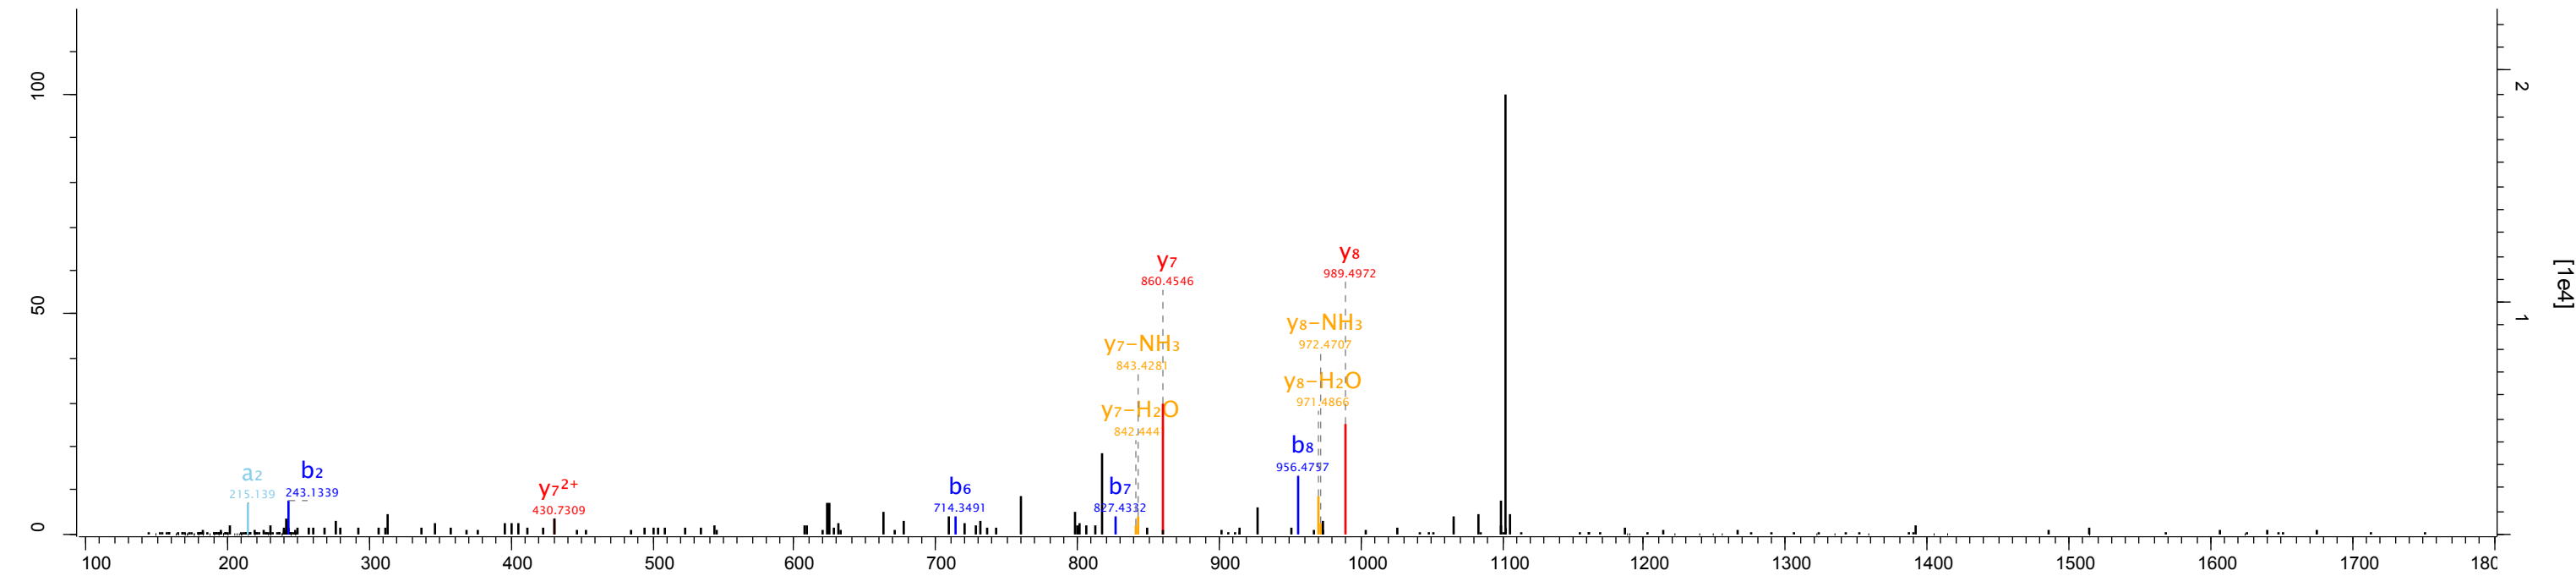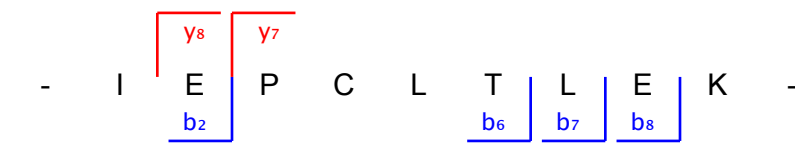

Raw file: 20150307\_NSC1\_Top\_opt\_F1\_01\_1678  
 Scan: 10494 Method: TOF; CID Score: 66.06 m/z: 572.78 Gene names: Nipa1

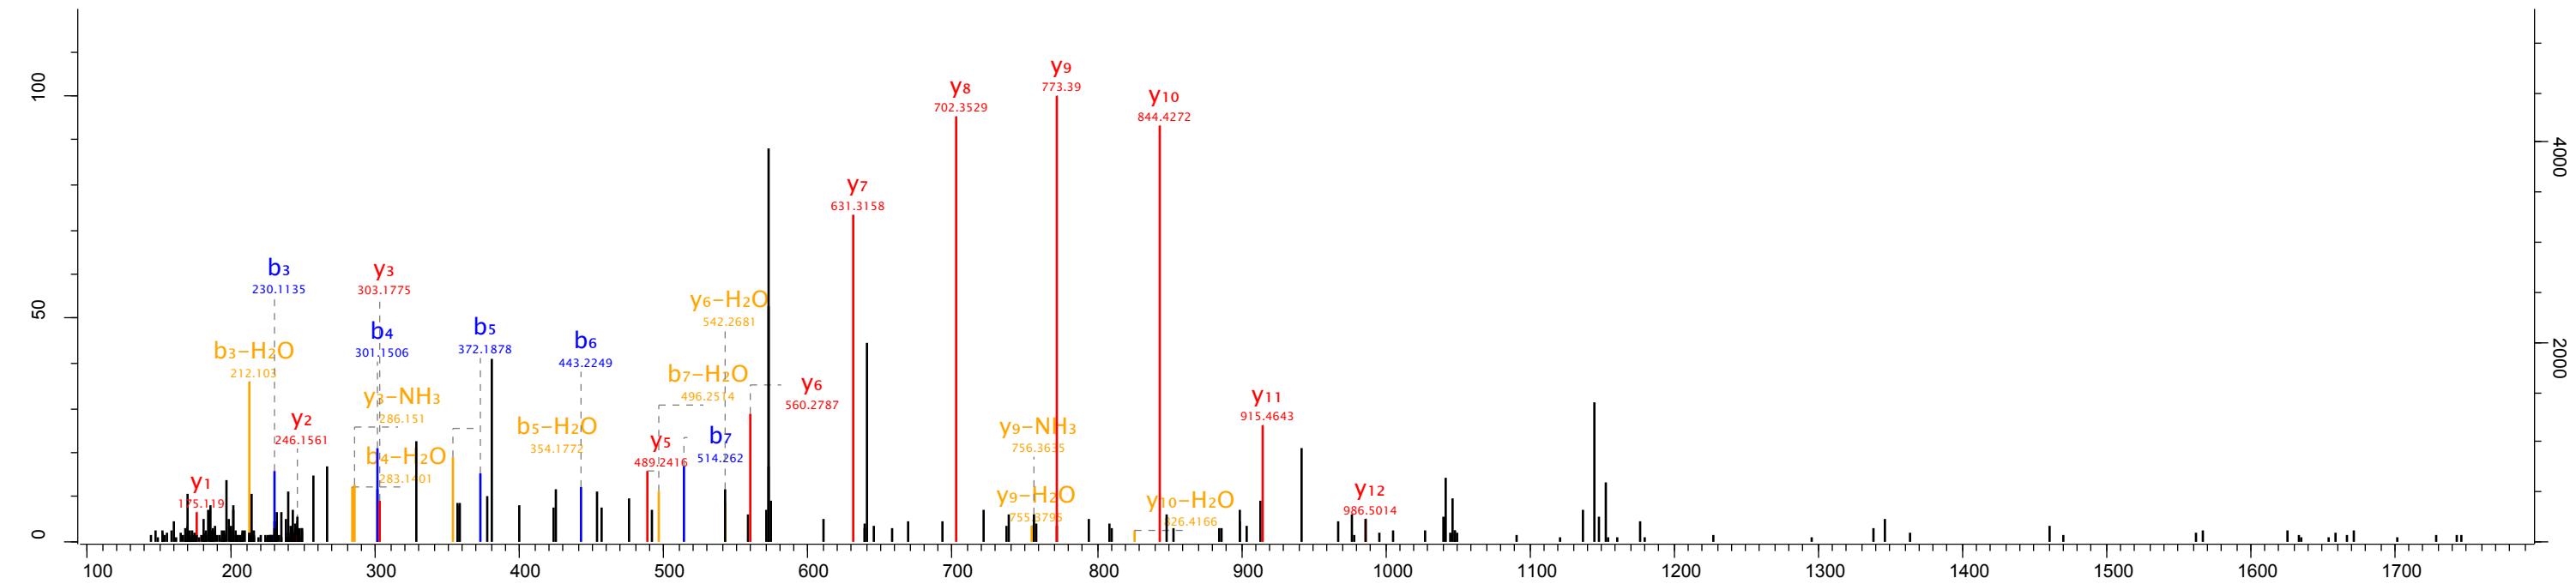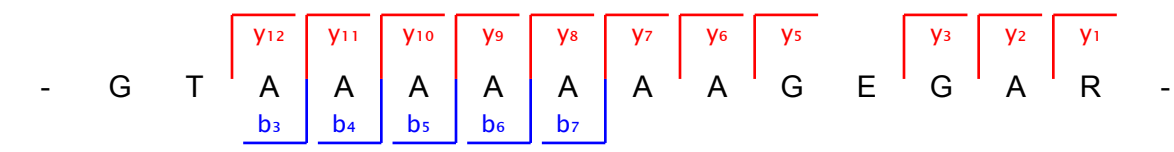

Raw file  
20150307\_NSC1\_Top\_opt\_F1\_01\_1678

Scan 10696 Method TOF; CID Score 47.65 m/z 884.71 Gene names Fiz1

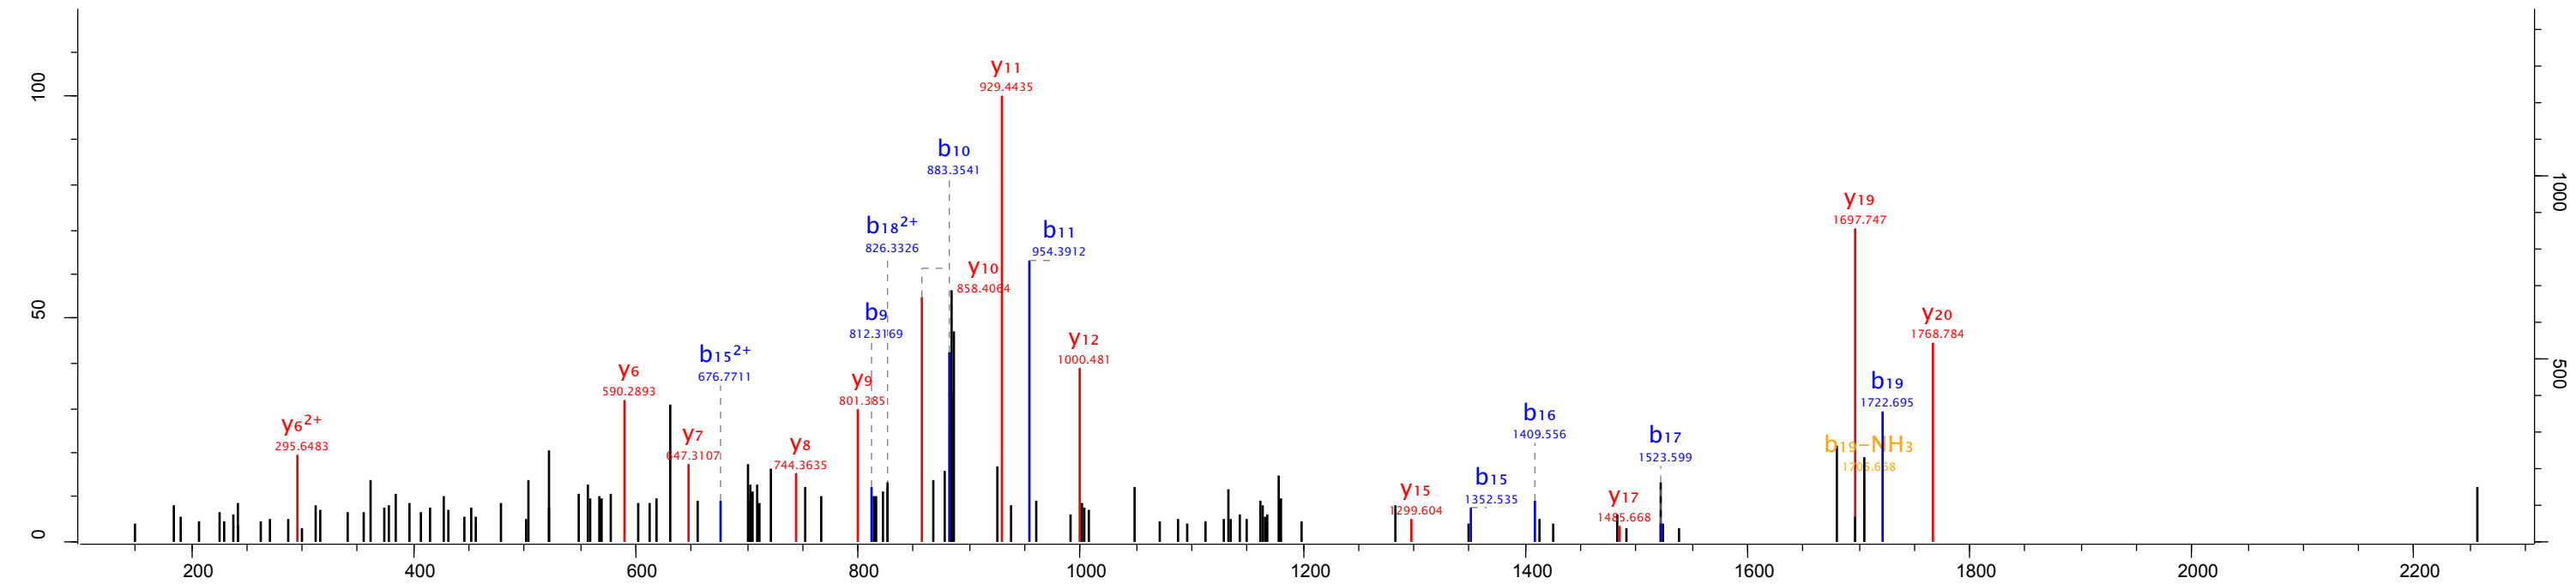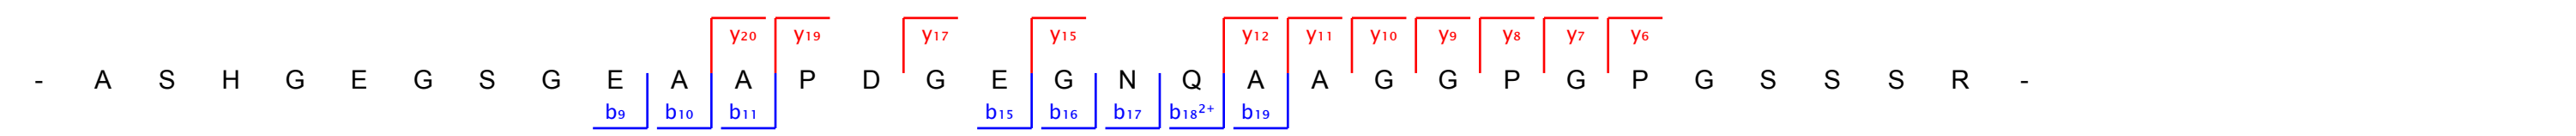

Raw file 20150307\_NSC1\_Top\_opt\_F1\_01\_1678 Scan 14329 Method TOF; CID Score 100.39 m/z 511.26 Gene names Dolpp1

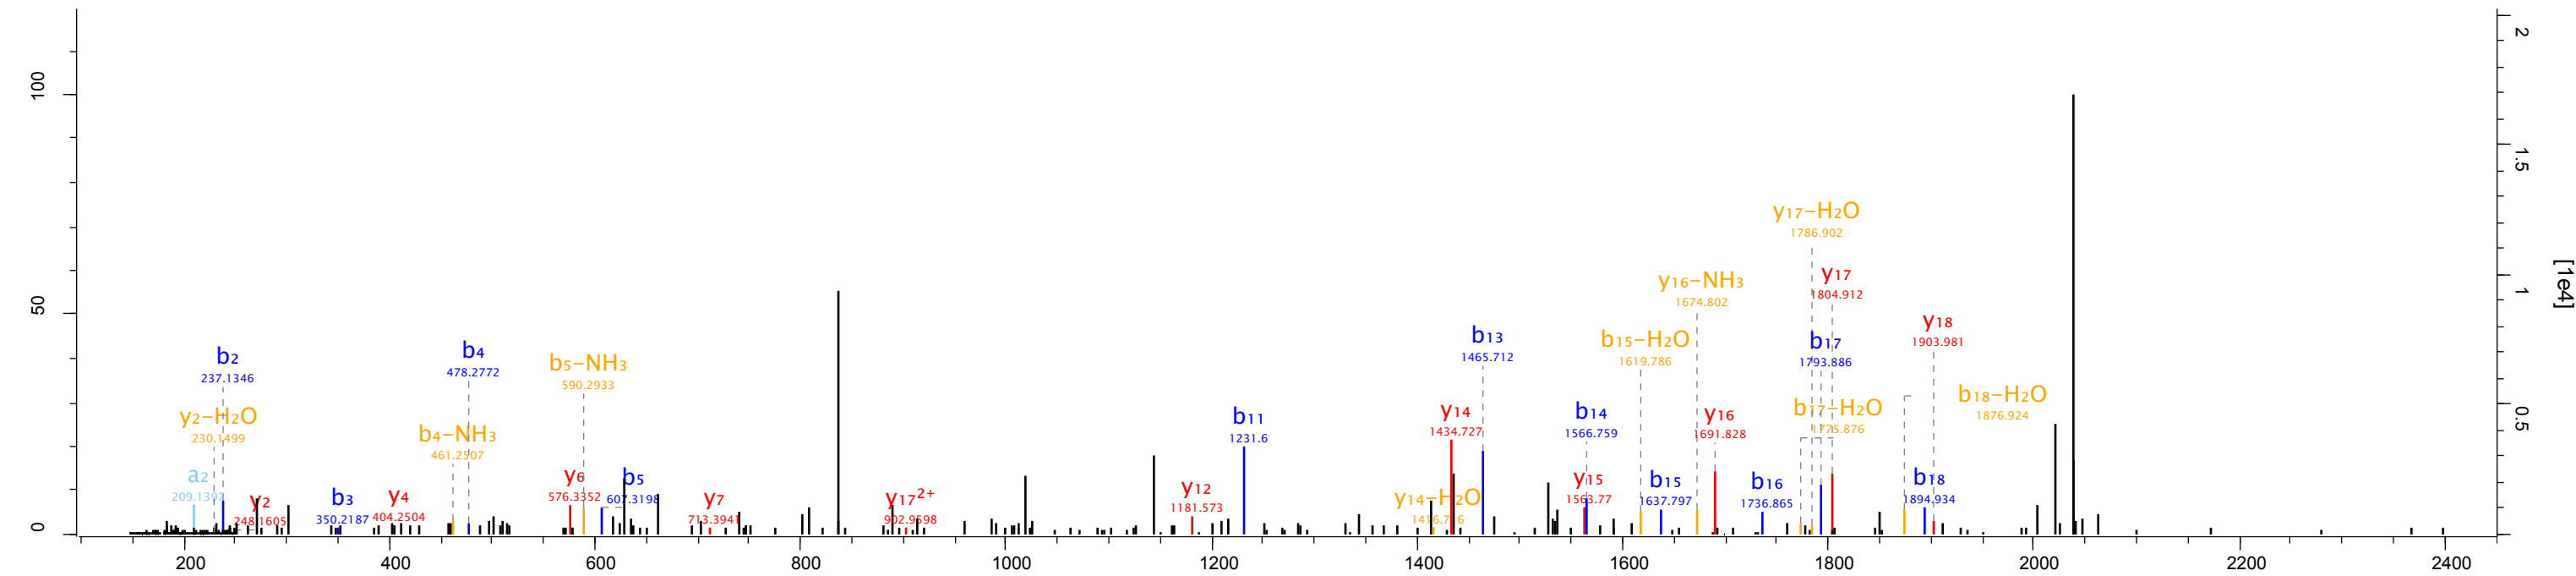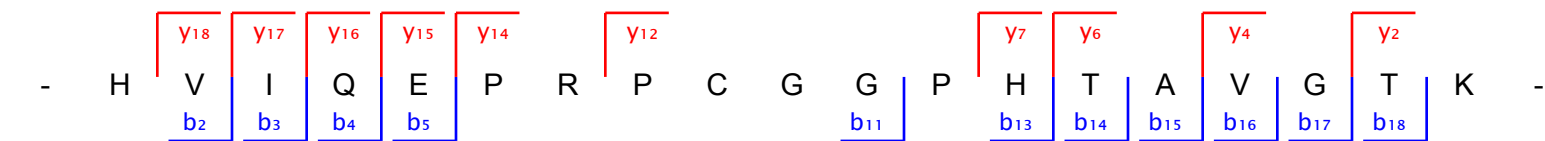

Raw file 20150307\_NSC1\_Top\_opt\_F1\_01\_1678 Scan 17315 Method TOF; CID Score 84.82 m/z 633.29 Gene names Astn1

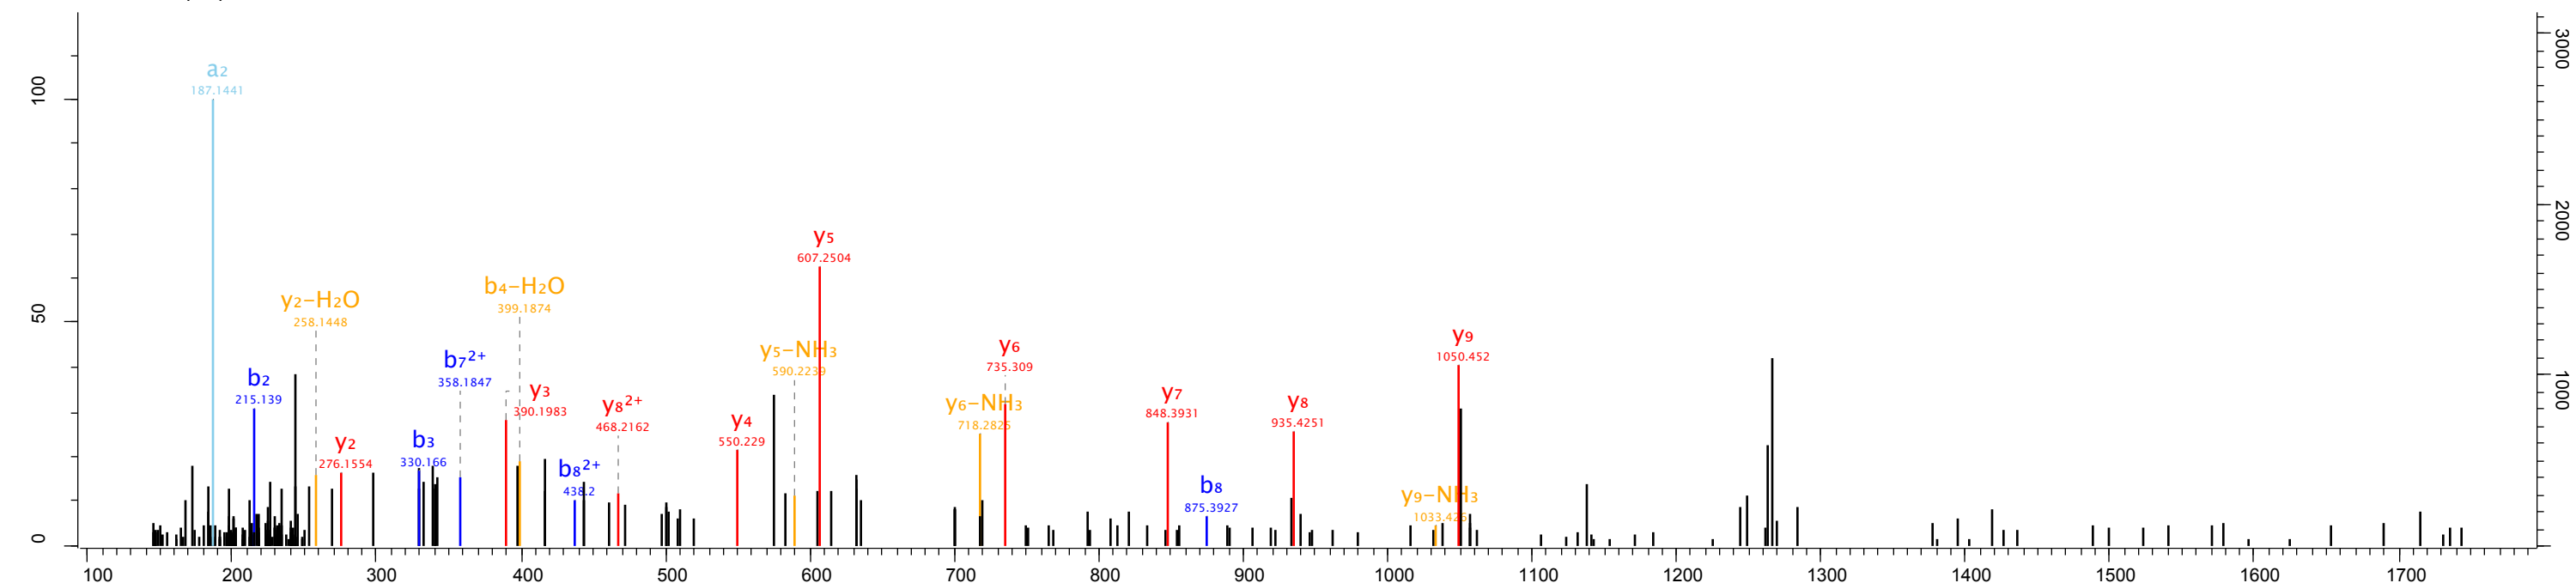

- T L D S L Q G C N E K -

Fragmentation mapping (b and y ions):

- b<sub>2</sub> (L), b<sub>3</sub> (LD)
- y<sub>2</sub> (E), y<sub>3</sub> (EN), y<sub>4</sub> (CGN), y<sub>5</sub> (G), y<sub>6</sub> (Q), y<sub>7</sub> (SL), y<sub>8</sub> (SD), y<sub>9</sub> (LD)



Raw file 20150307\_NSC1\_Top\_opt\_F1\_01\_1678 Scan 19391 Method TOF; CID Score 41.51 m/z 695.34 Gene names Traf3ip2

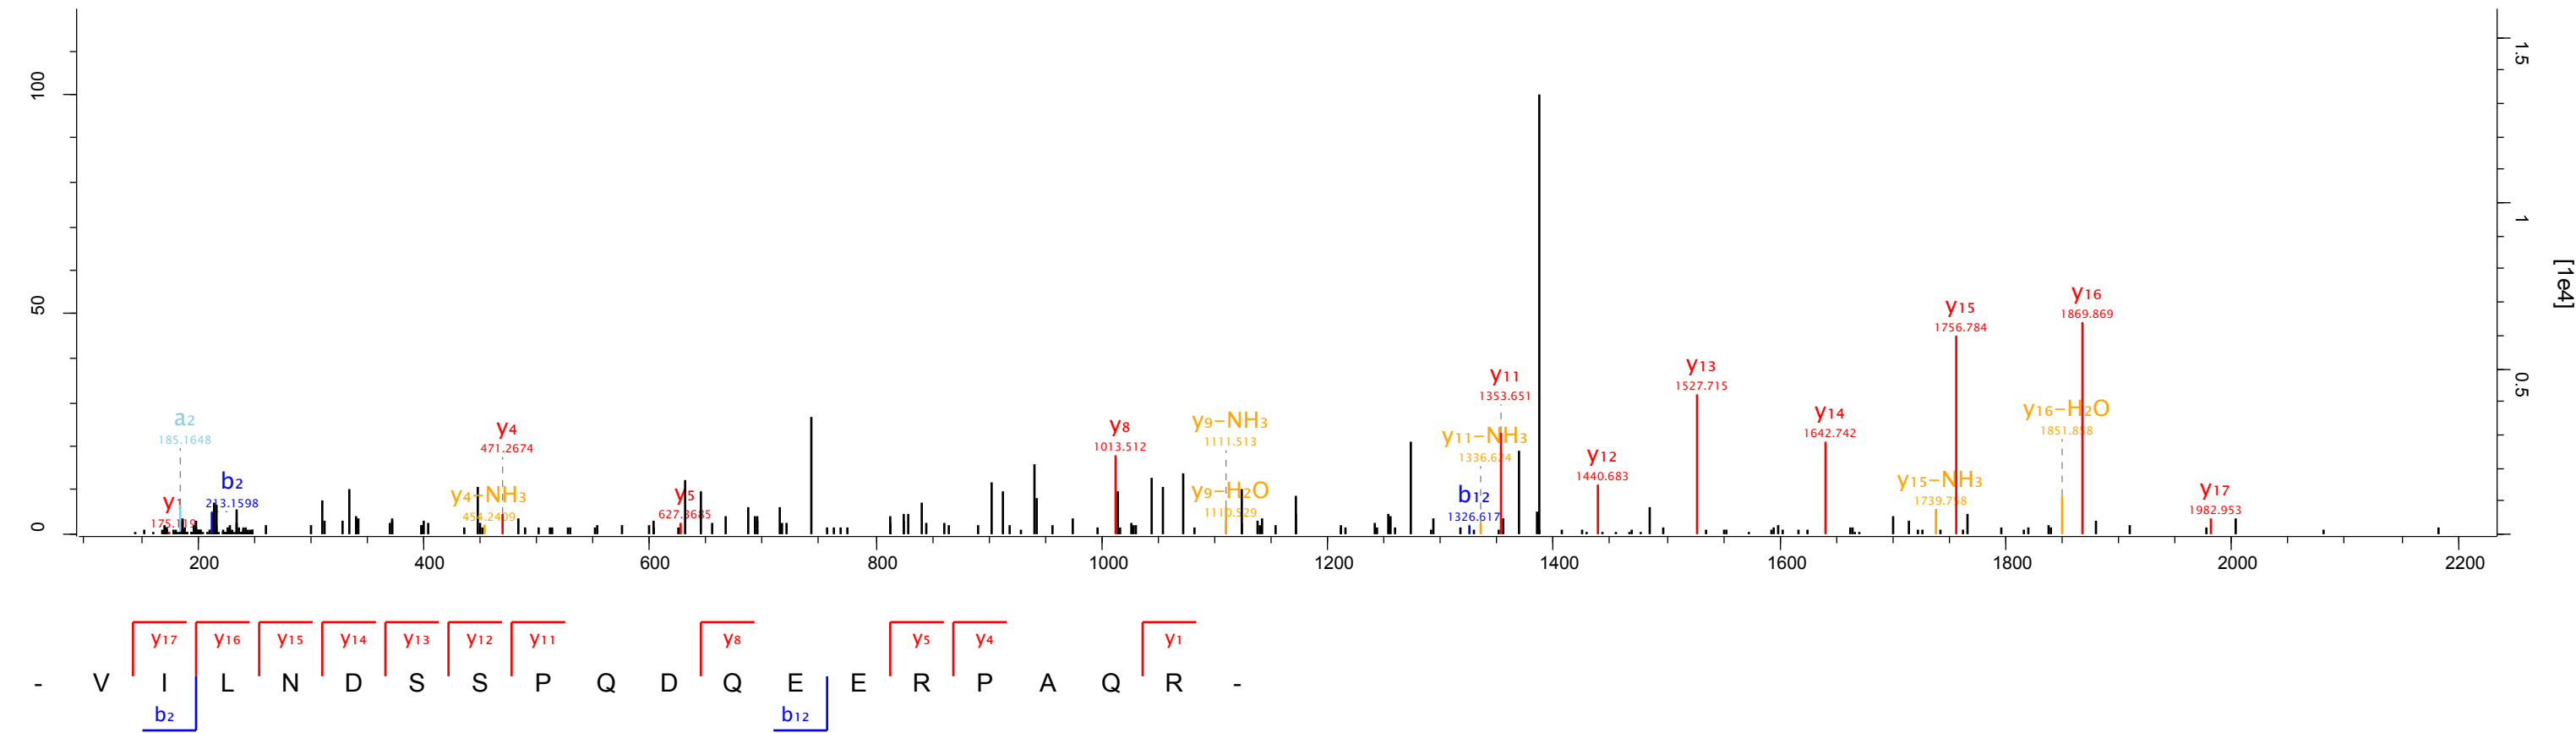

Raw file 20150307\_NSC1\_Top\_opt\_F1\_01\_1678 Scan 21887 Method TOF; CID Score 110.35 m/z 746.85 Gene names Cdyl

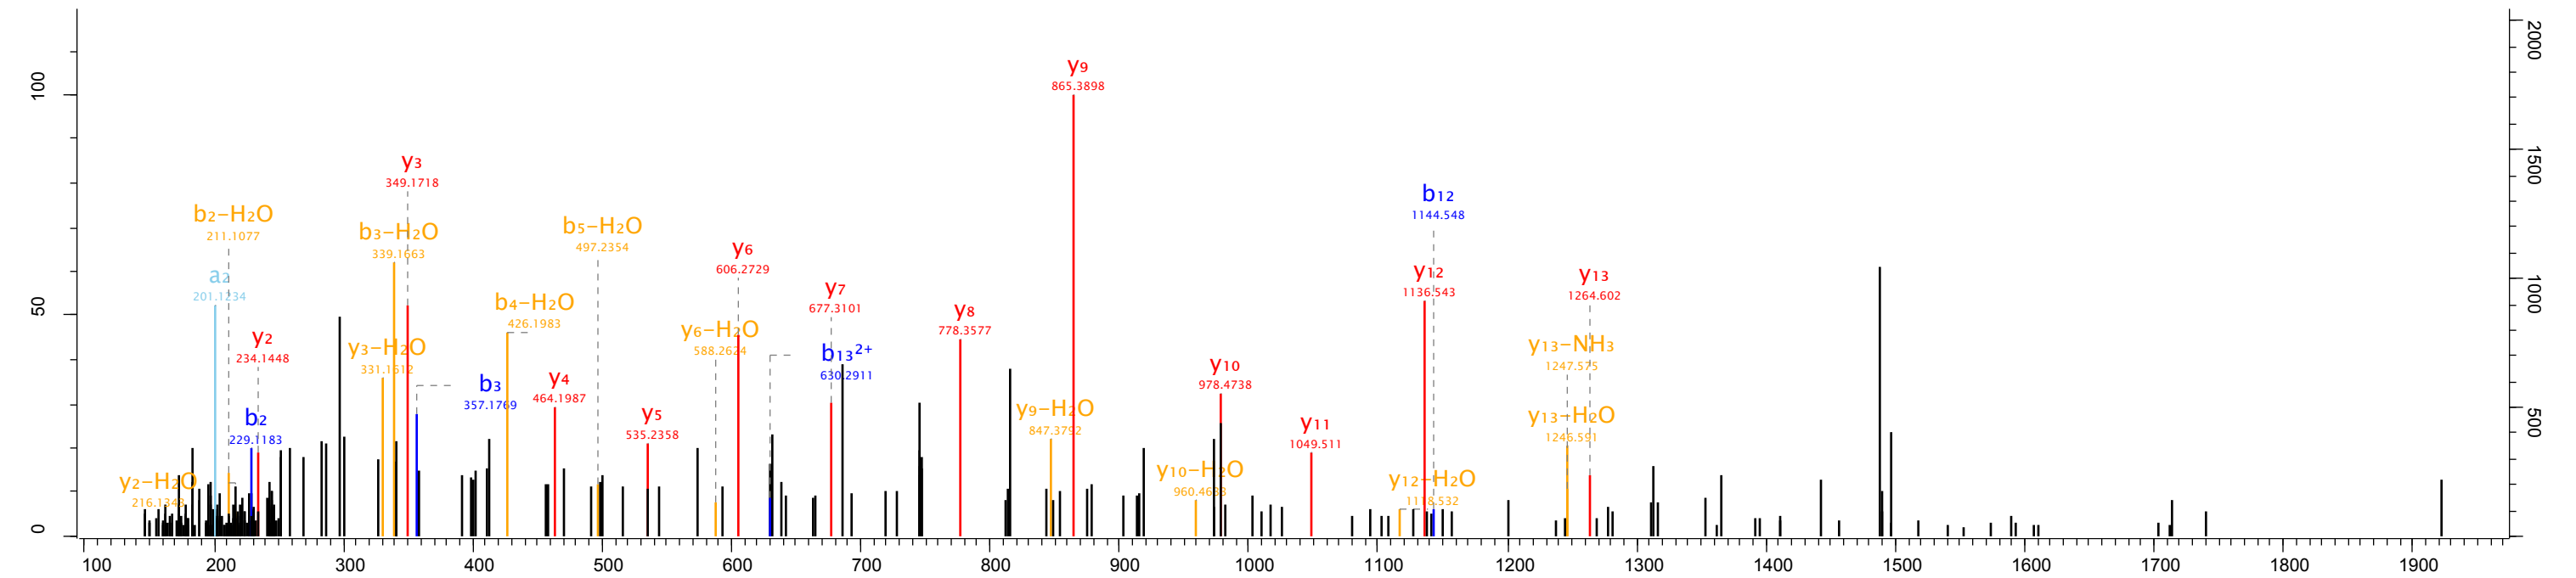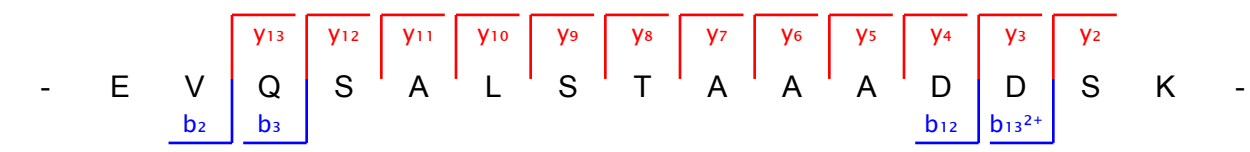

Raw file 20150307\_NSC1\_Top\_opt\_F1\_01\_1678 Scan 27146 Method TOF; CID Score 51.03 m/z 673.35 Gene names R3hdm1

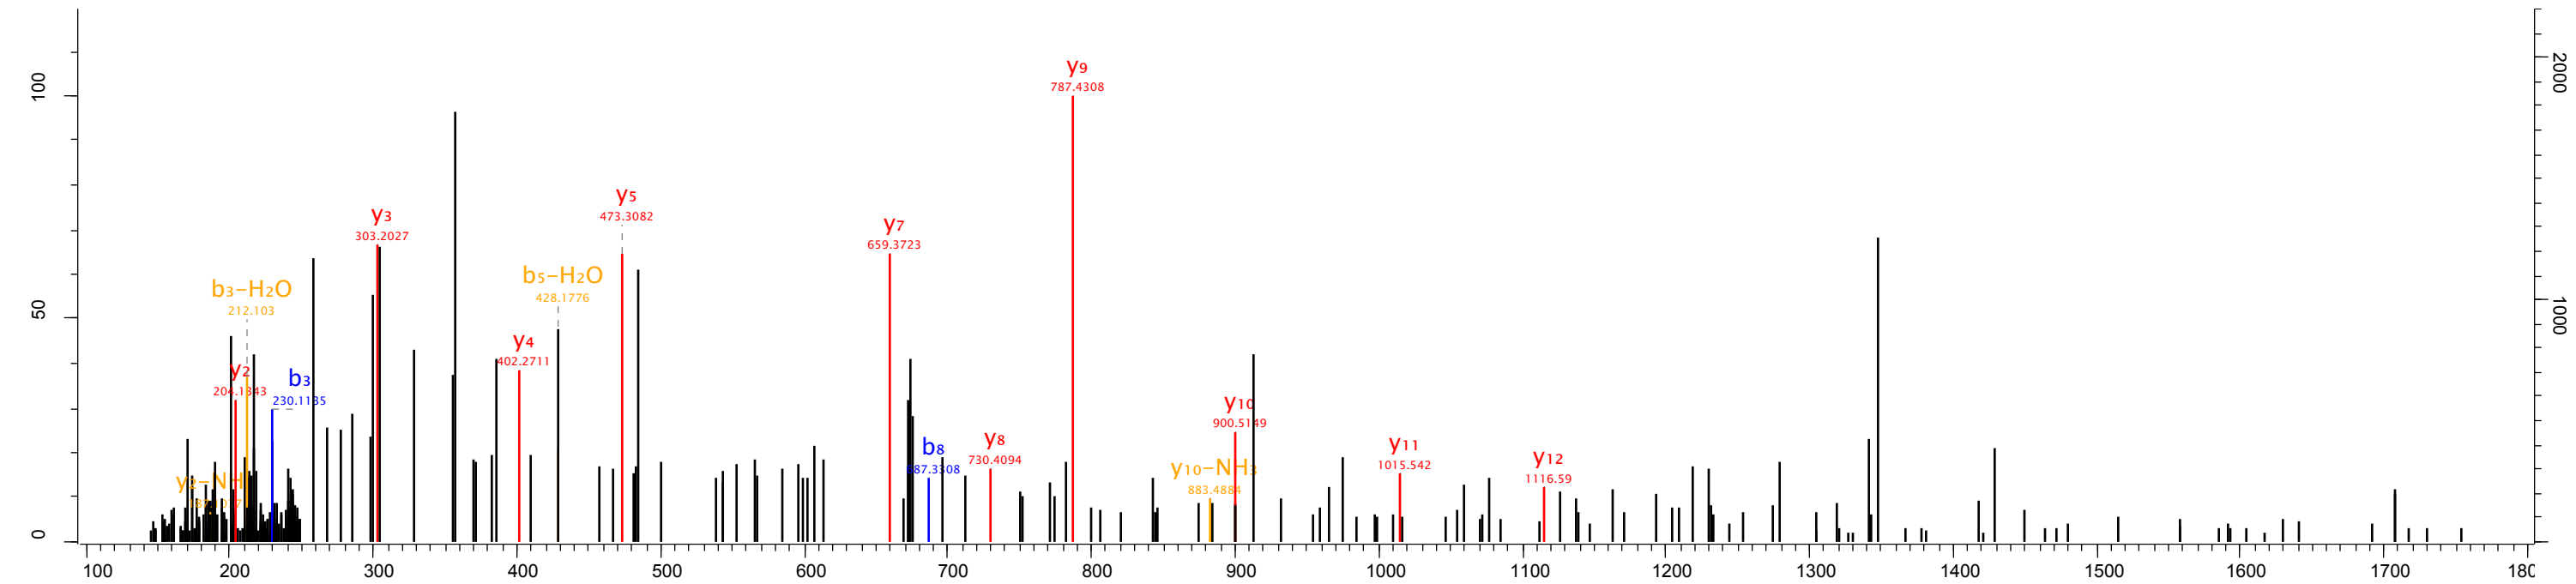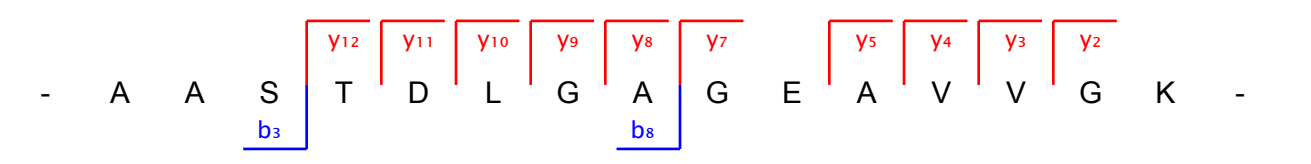

Raw file 20150307\_NSC1\_Top\_opt\_F1\_01\_1678 Scan 39262 Method TOF; CID Score 69.19 m/z 960.47

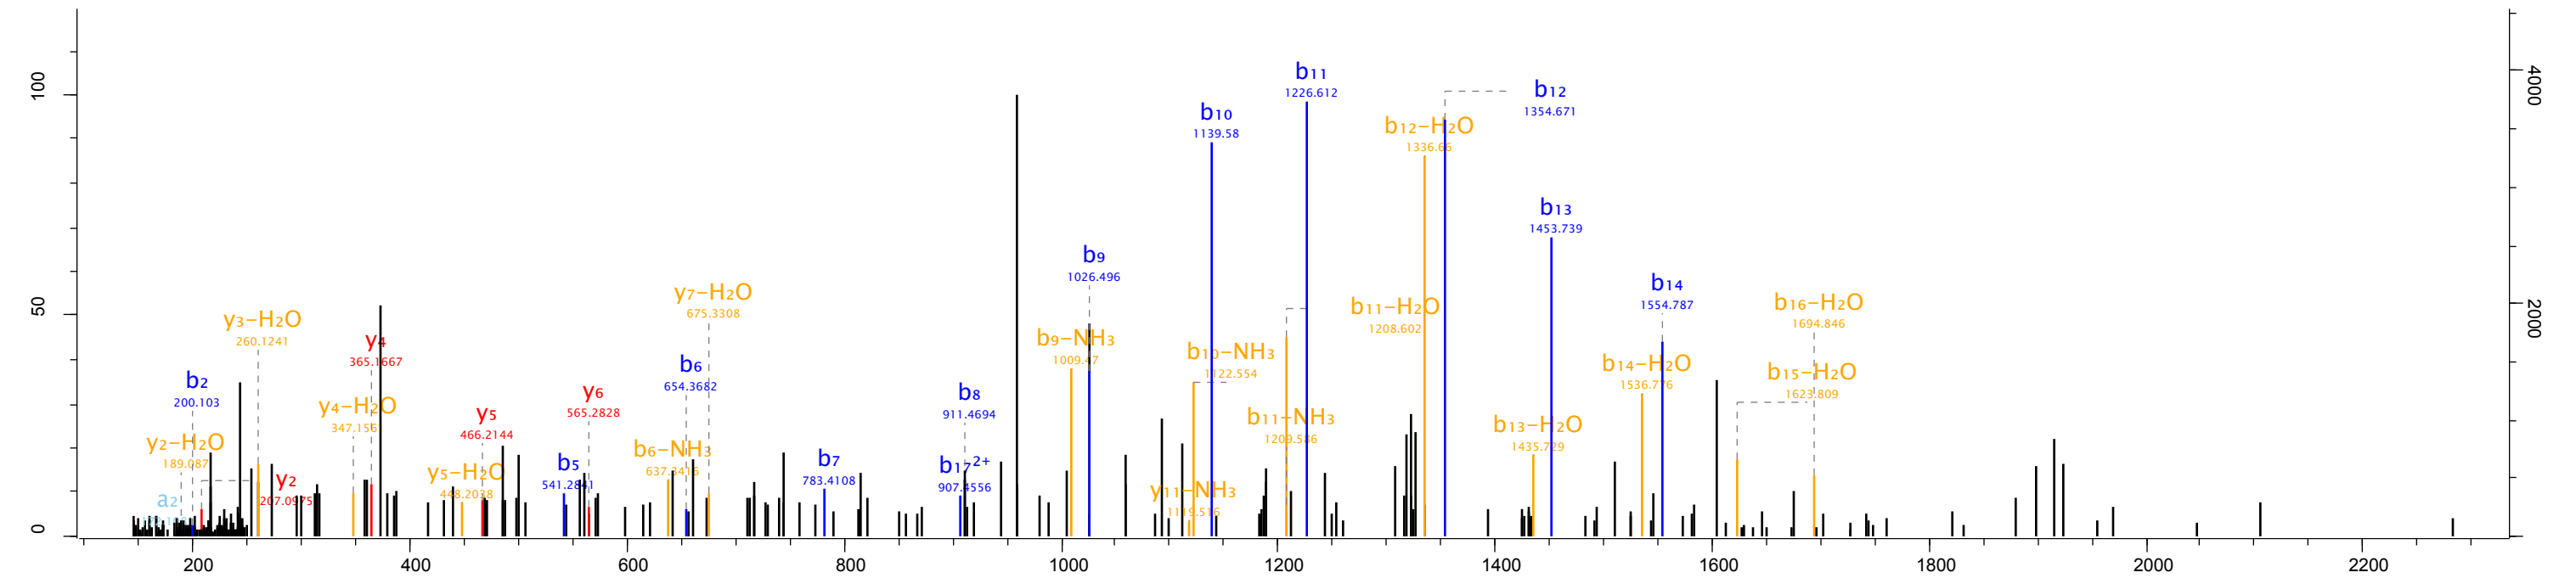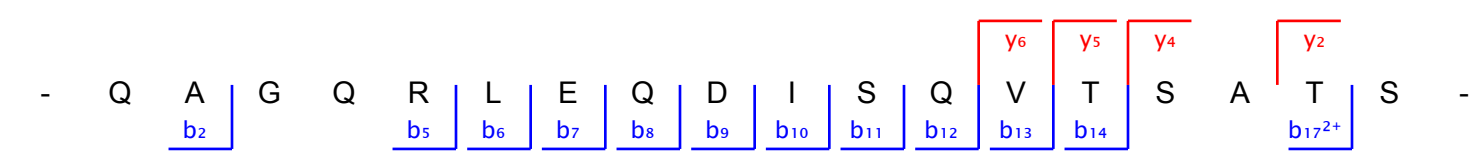

Raw file  
20150307\_NSC1\_Top\_opt\_F1\_01\_1678

Scan 40040 Method TOF; CID Score 76.22 m/z 598.32 Gene names Mtatp8;mt-Atp8

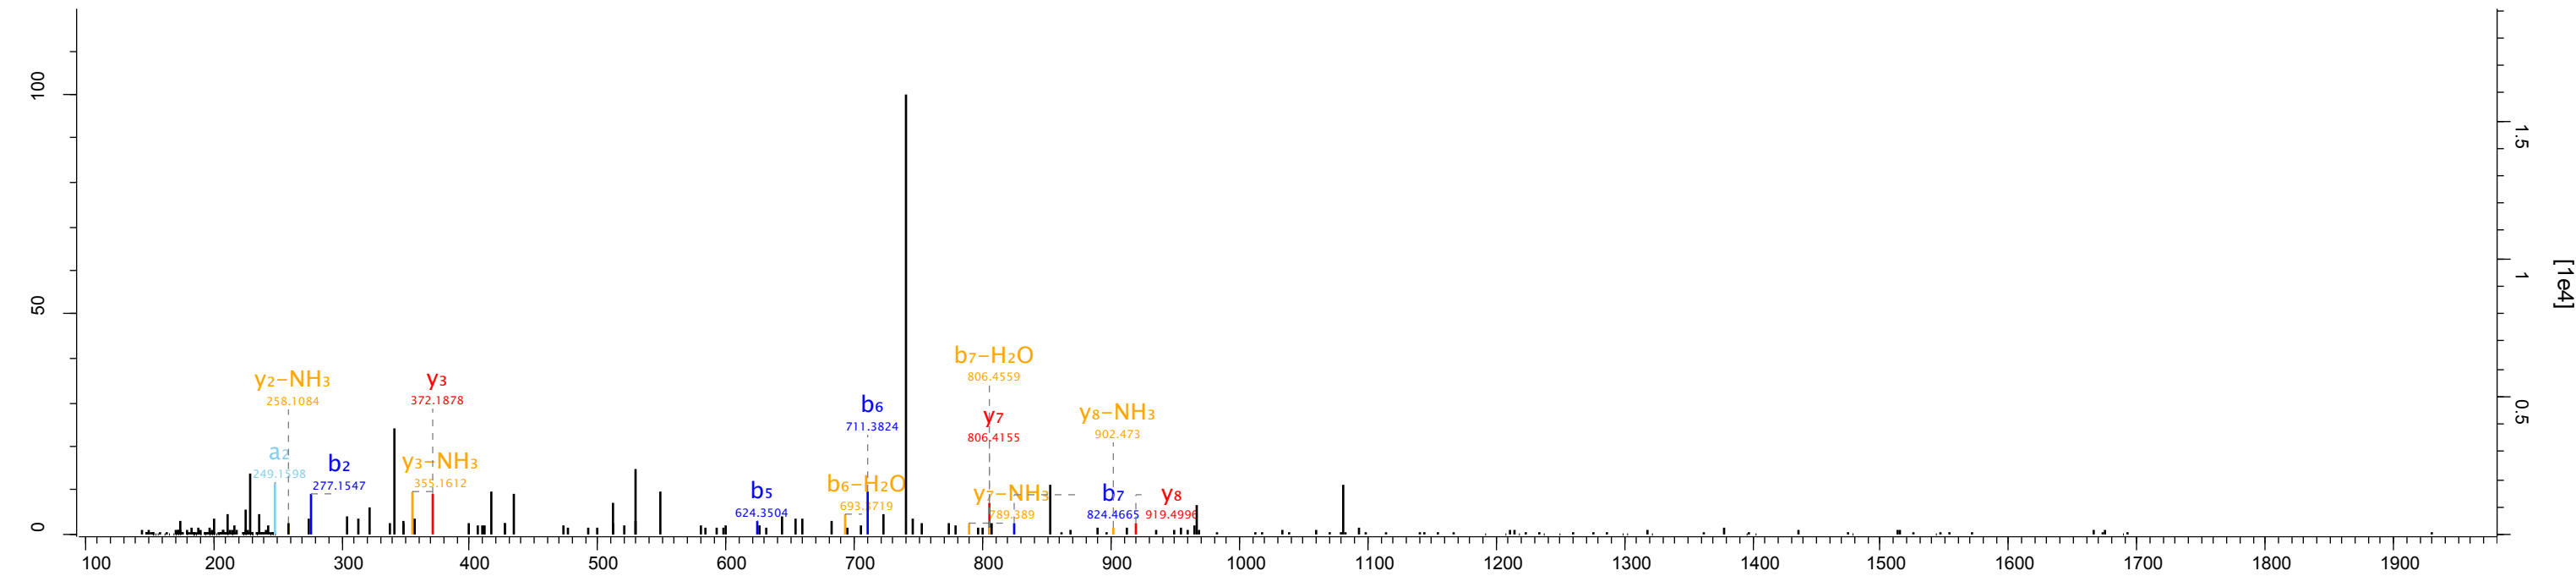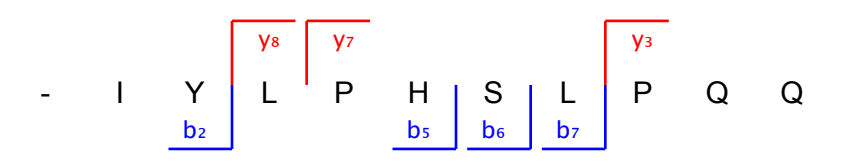

Raw file 20150307\_NSC1\_Top\_opt\_F1\_01\_1678 Scan 41055 Method TOF; CID Score 80.74 m/z 949.41 Gene names Slc36a1

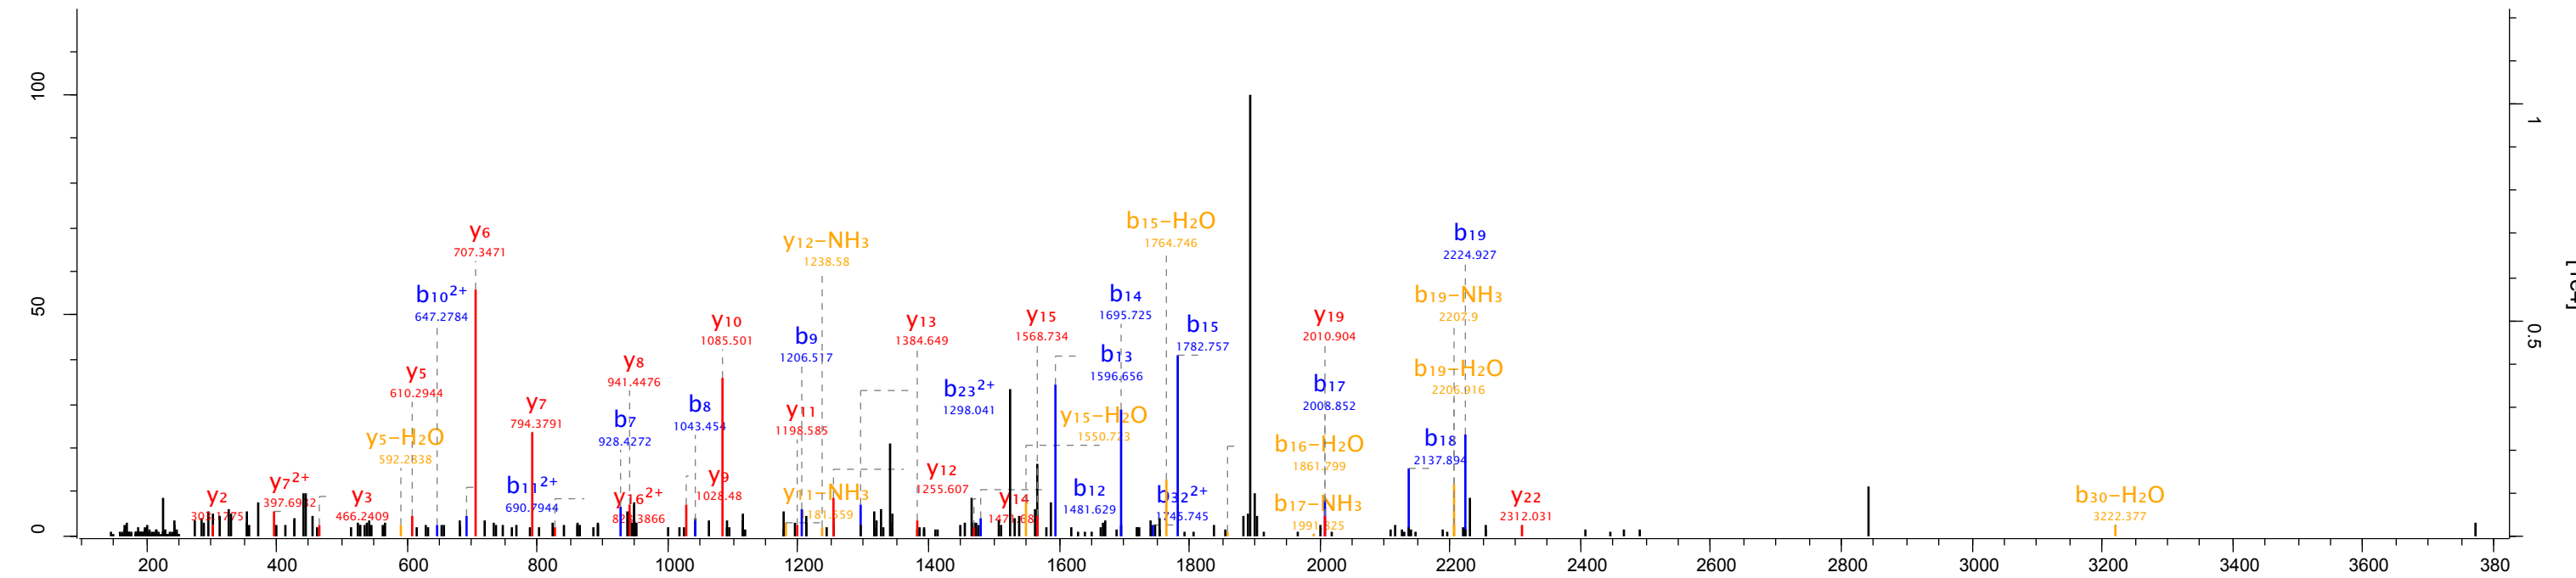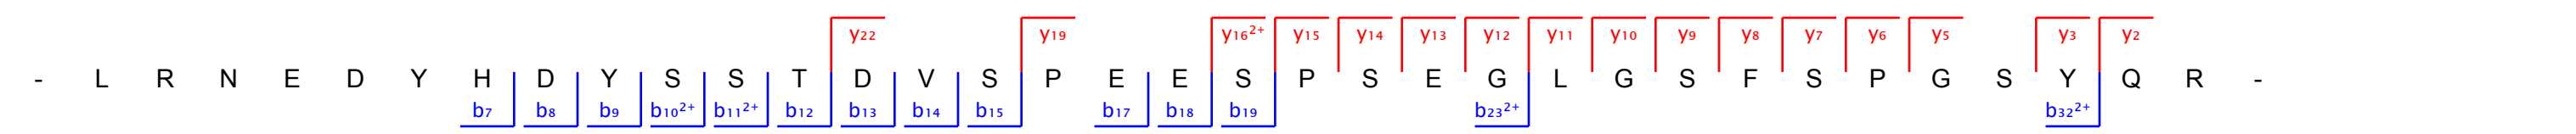

Raw file 20150307\_NSC1\_Top\_opt\_F1\_01\_1678 Scan 43340 Method TOF; CID Score 105.06 m/z 809.39 Gene names Ccdc97

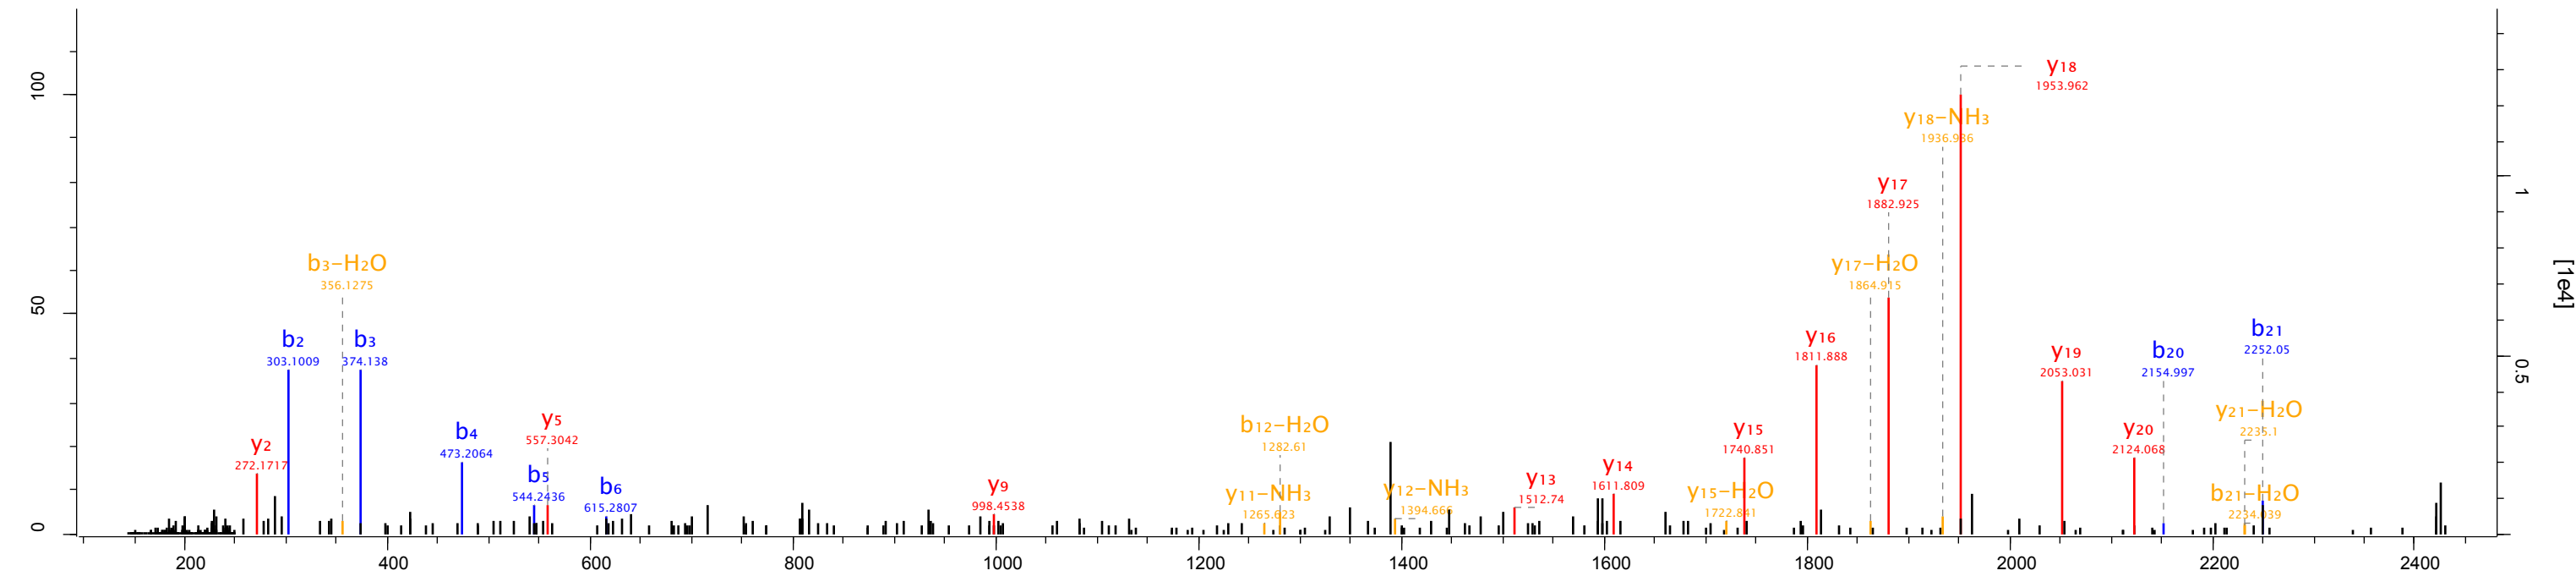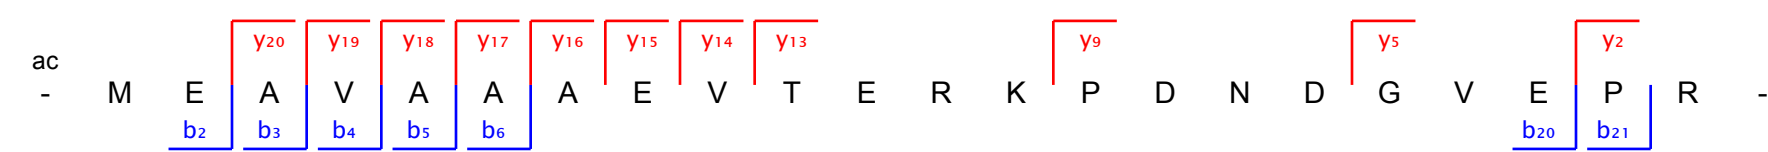

Raw file 20150307\_NSC1\_Top\_opt\_F1\_01\_1678 Scan 46955 Method TOF; CID Score 72.2 m/z 583.33 Gene names Mab2112;Mab2111

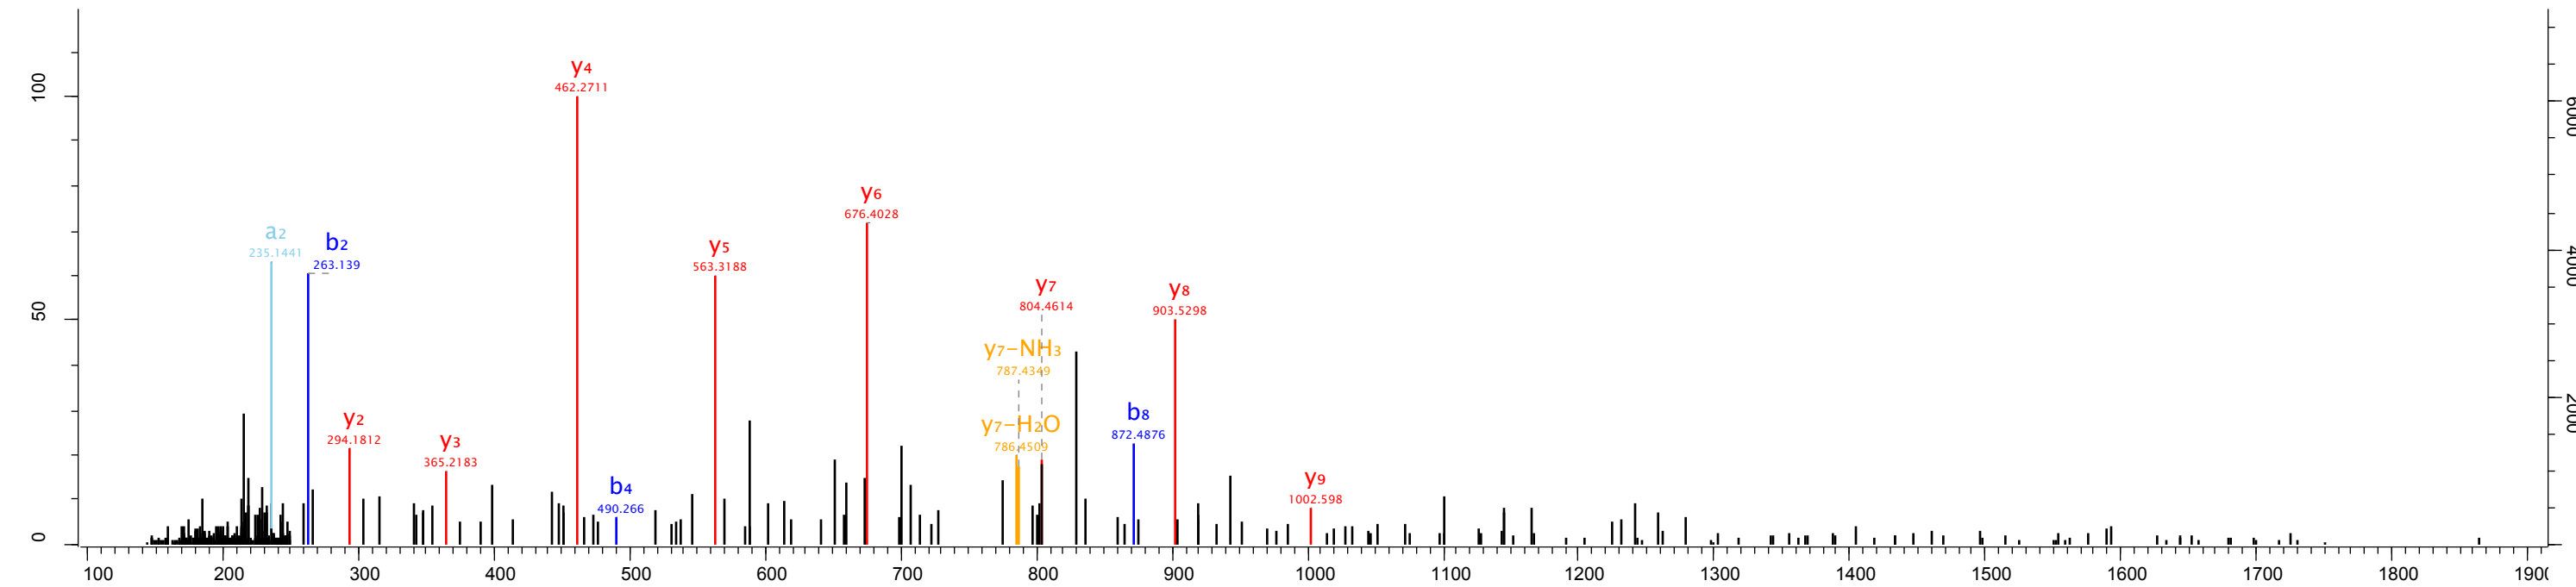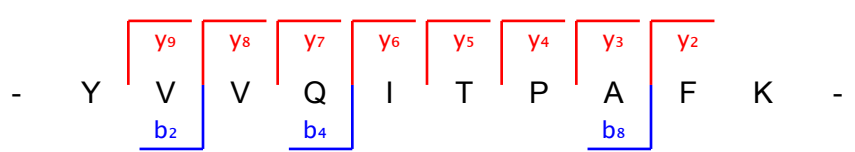



Raw file 20150307\_NSC1\_Top\_opt\_F1\_01\_1678 Scan 50279 Method TOF; CID Score 58.69 m/z 687.37 Gene names Hmgxb4

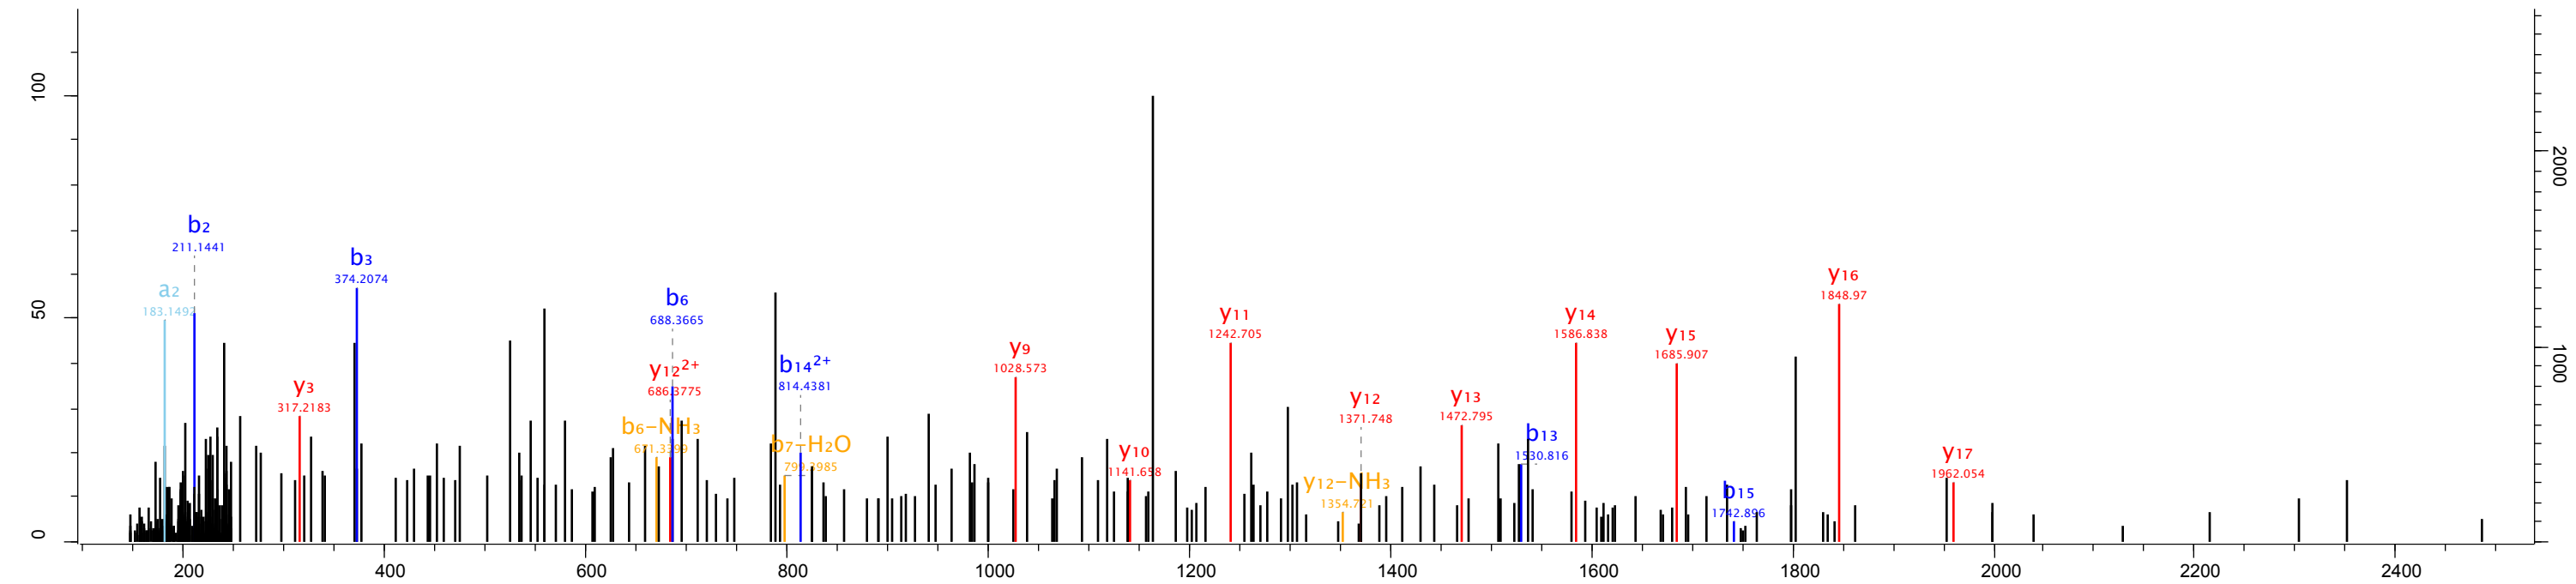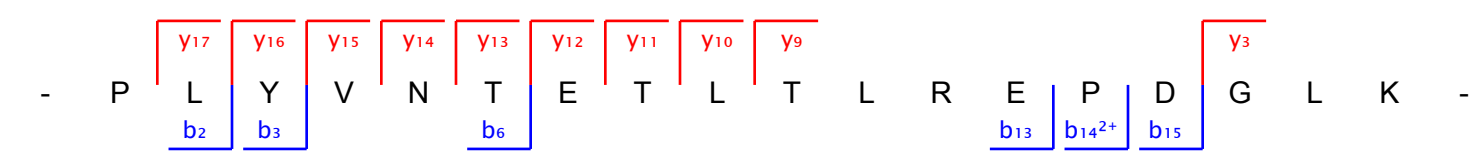

Raw file 20150307\_NSC1\_Top\_opt\_F1\_01\_1678 Scan 50405 Method TOF; CID Score 71.6 m/z 915.46 Gene names Nadk

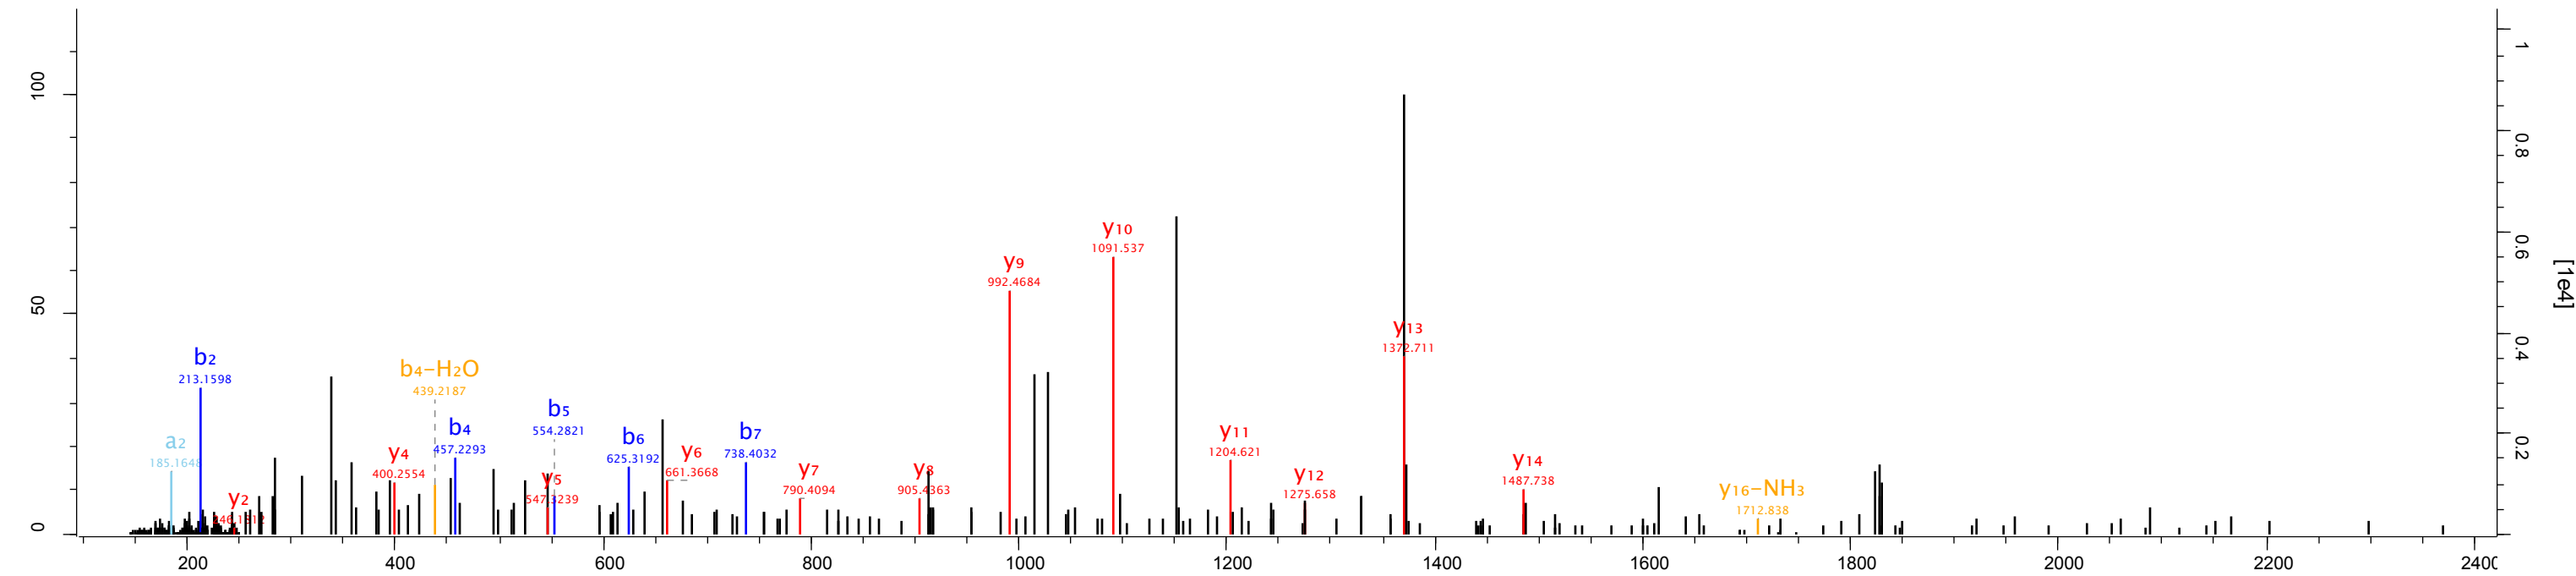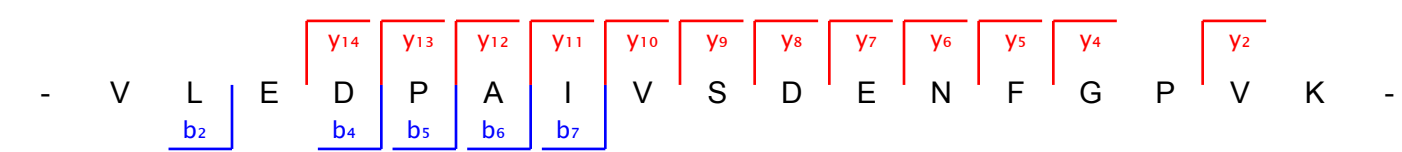

Raw file: 20150307\_NSC1\_Top\_opt\_F1\_01\_1678  
 Scan: 52349 Method: TOF; CID Score: 55.44 m/z: 991.5 Gene names: Ube2w

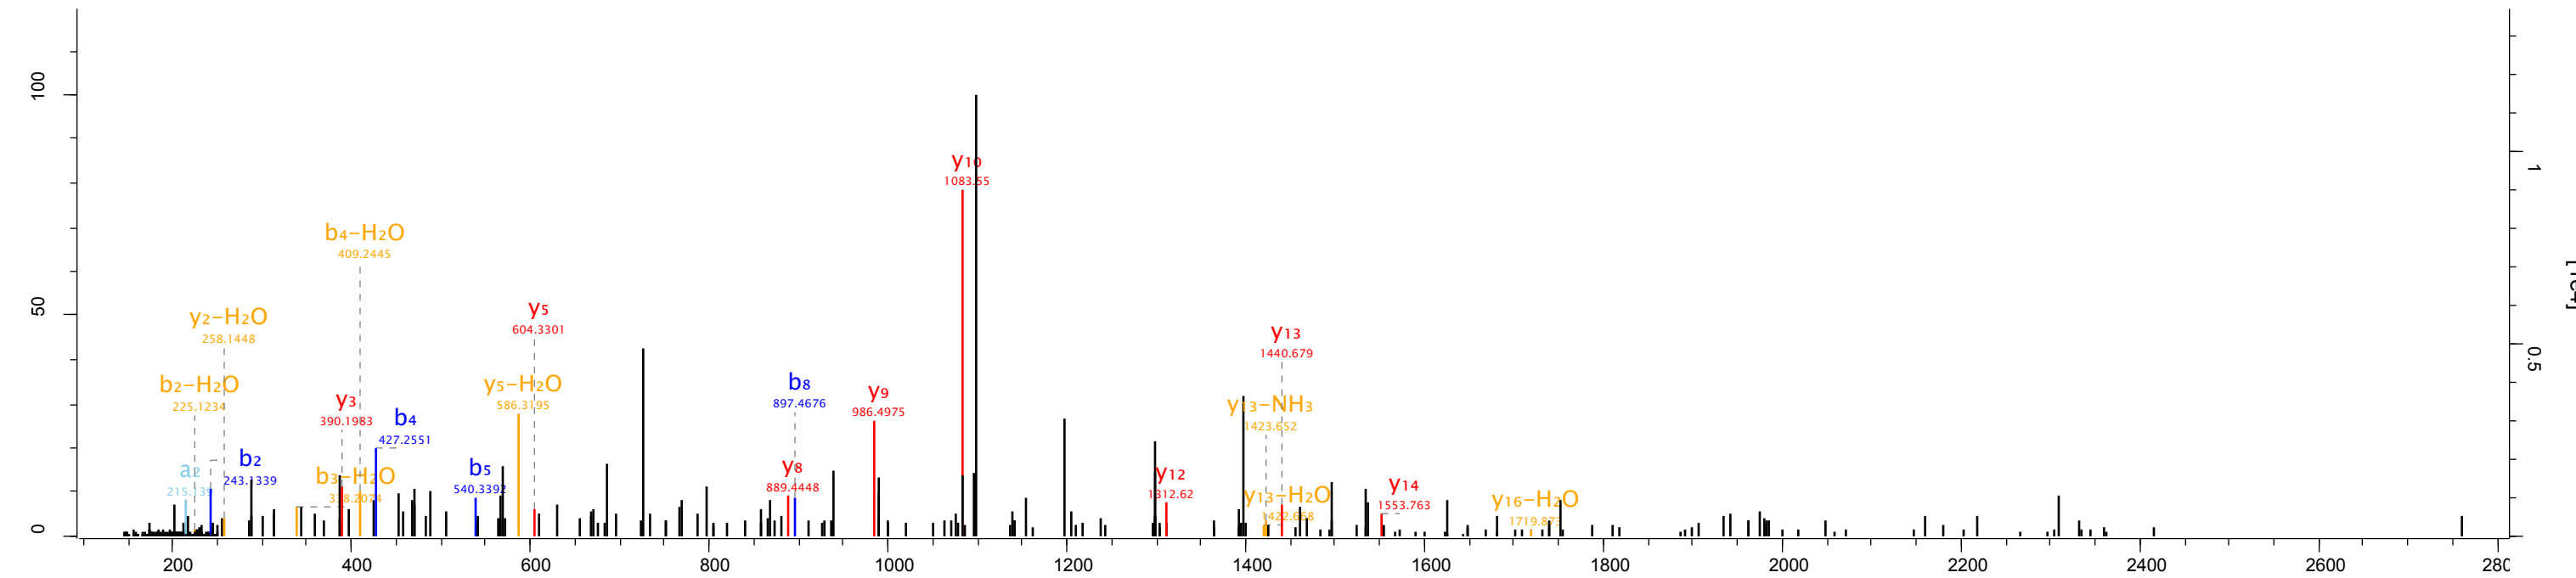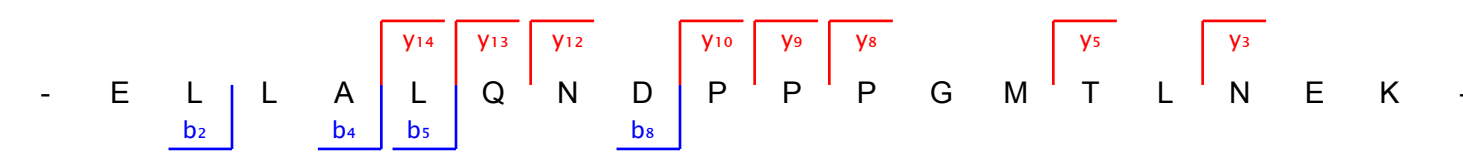

Raw file 20150307\_NSC1\_Top\_opt\_F1\_01\_1678 Scan 52580 Method TOF; CID Score 62.36 m/z 541.3 Gene names Mterf2

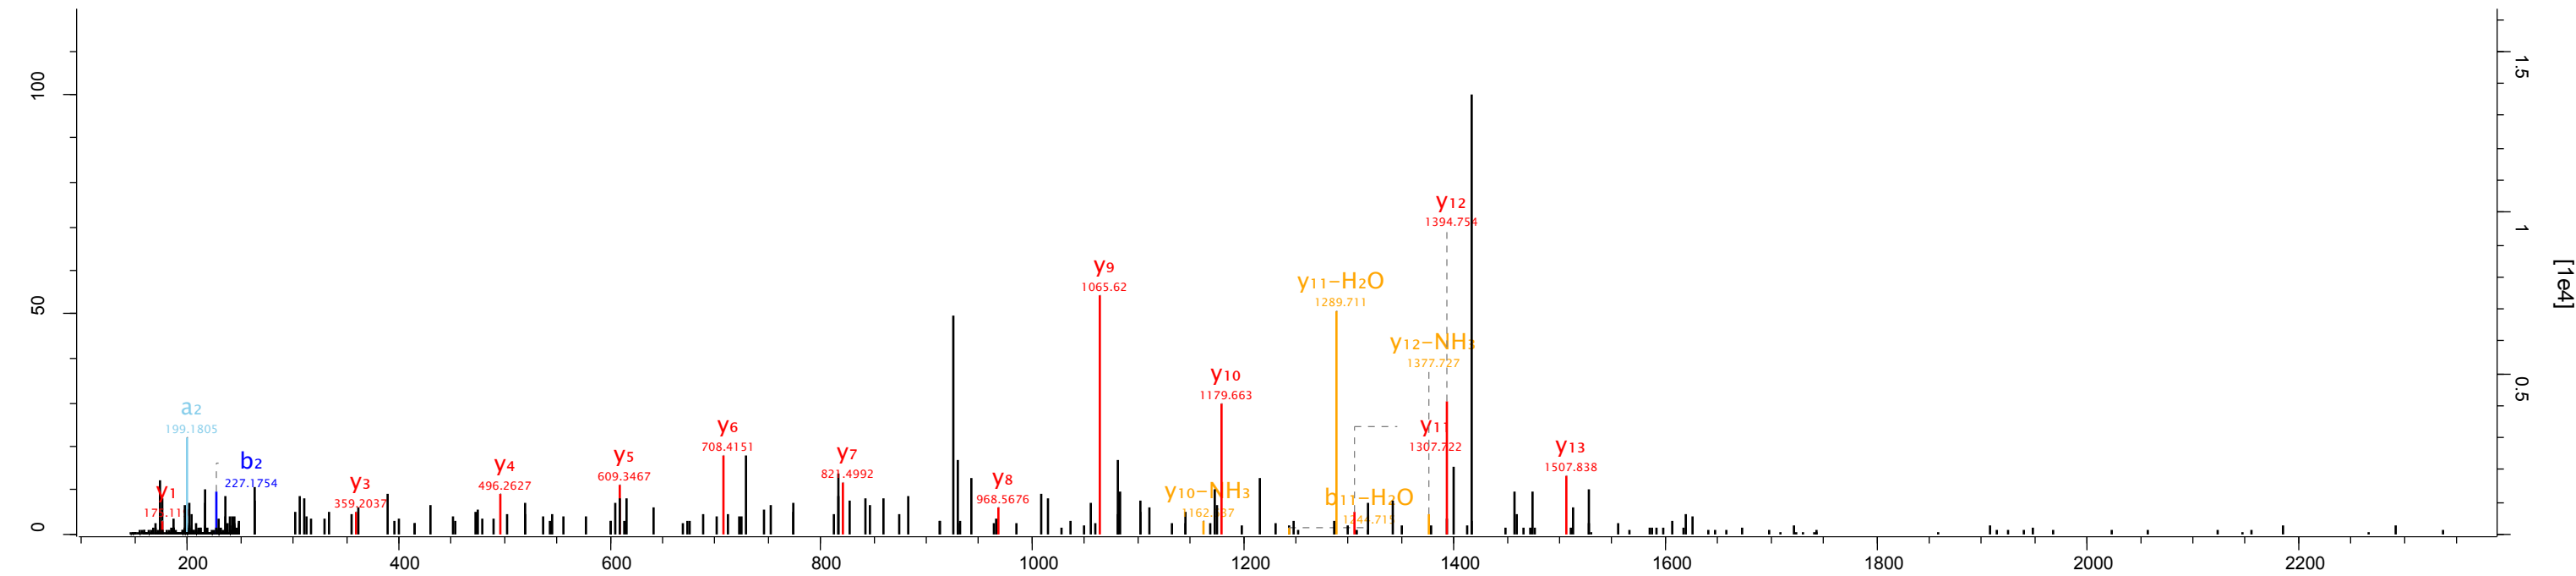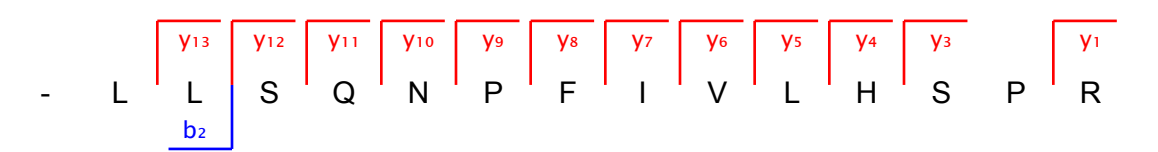

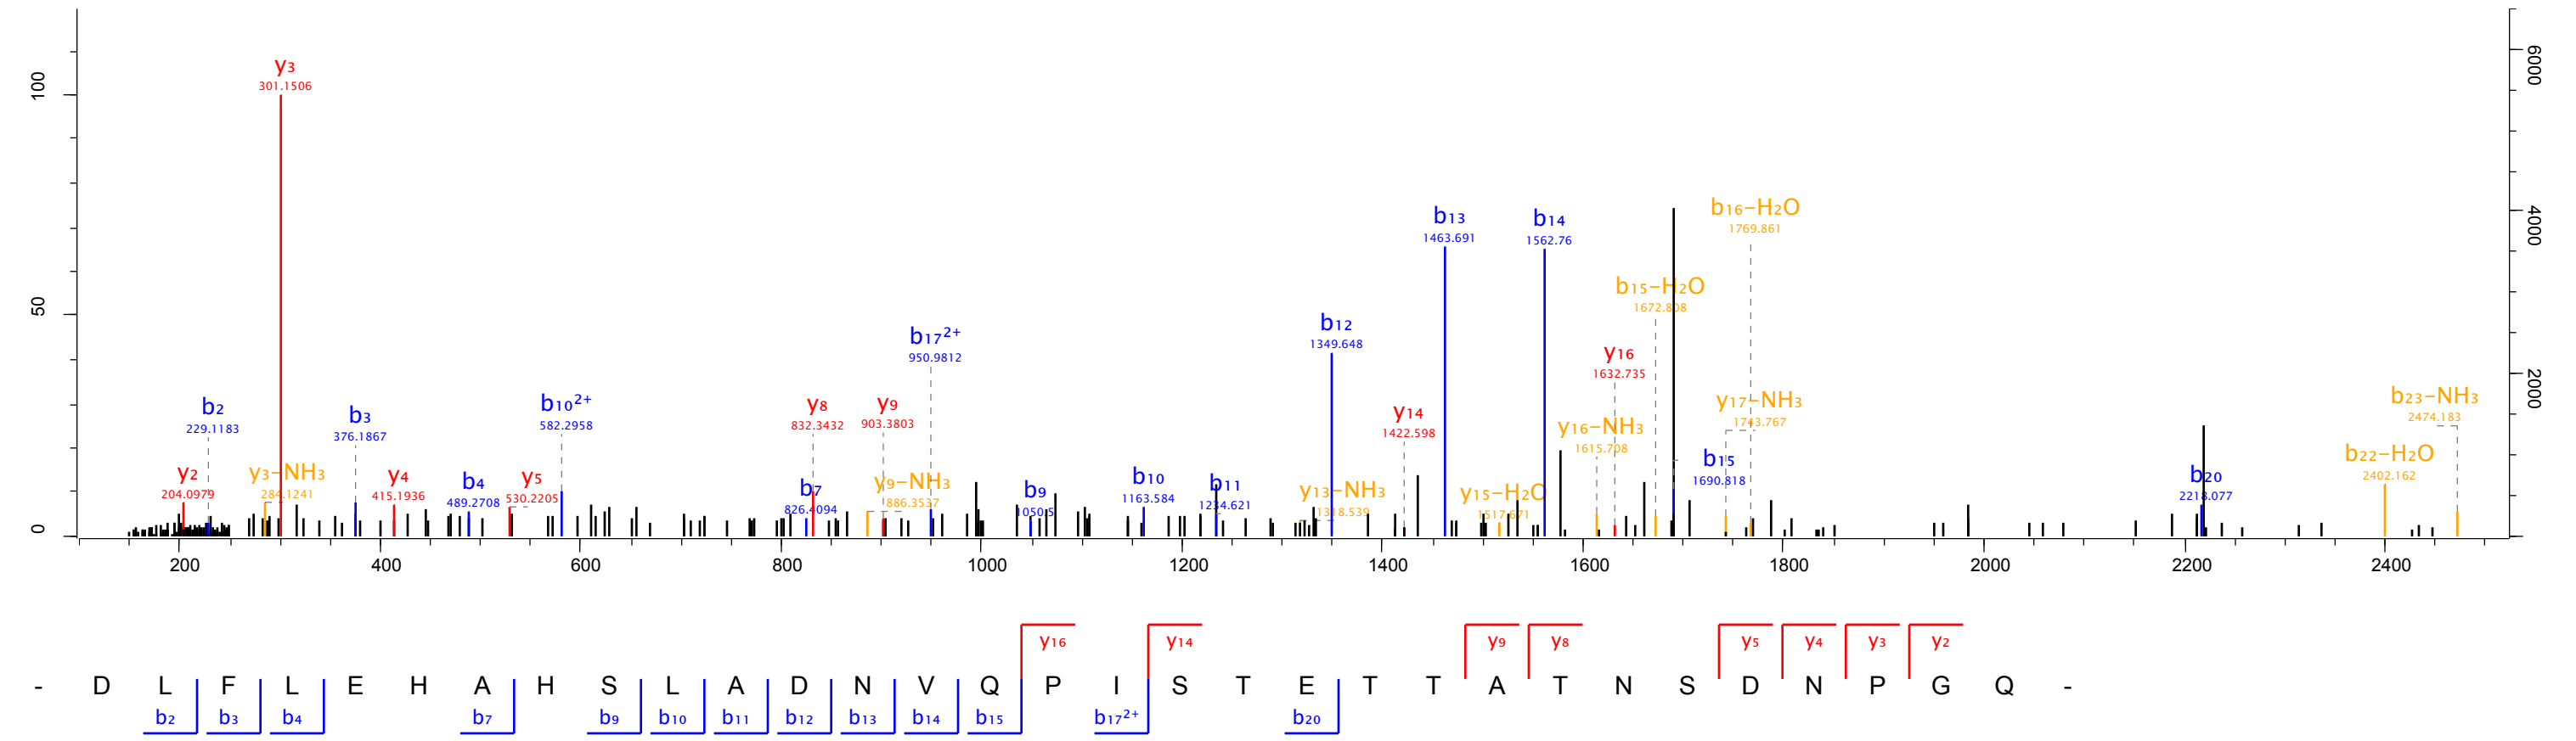

Raw file 20150307\_NSC1\_Top\_opt\_F1\_01\_1678 Scan 54856 Method TOF; CID Score 101.74 m/z 1016.99 Gene names Hdhd2;Ier3ip1

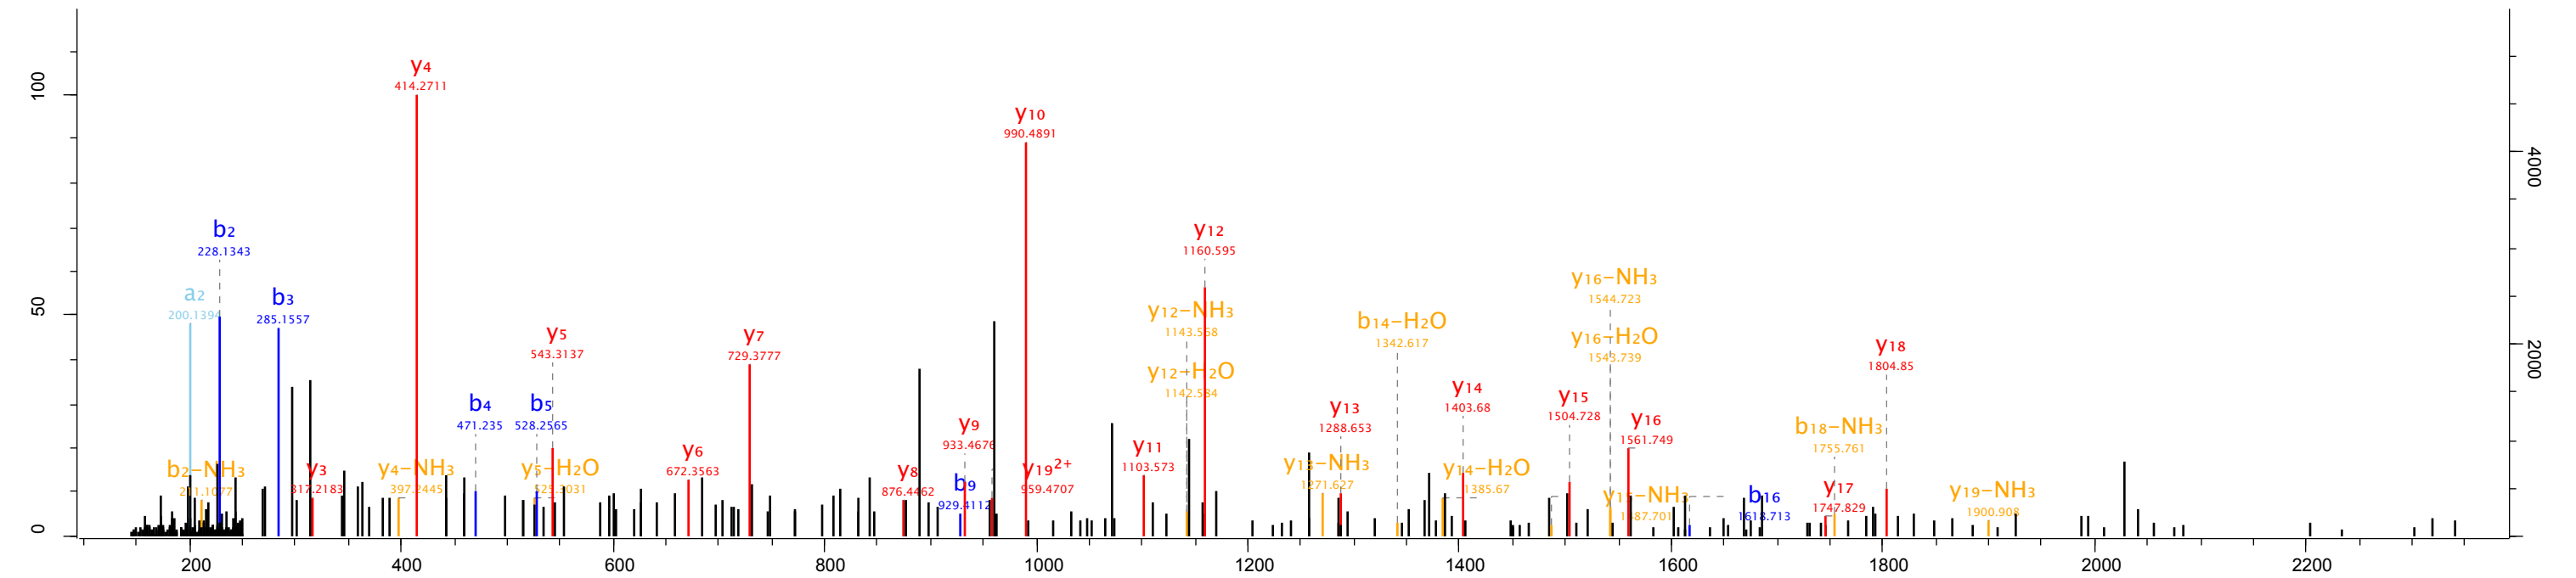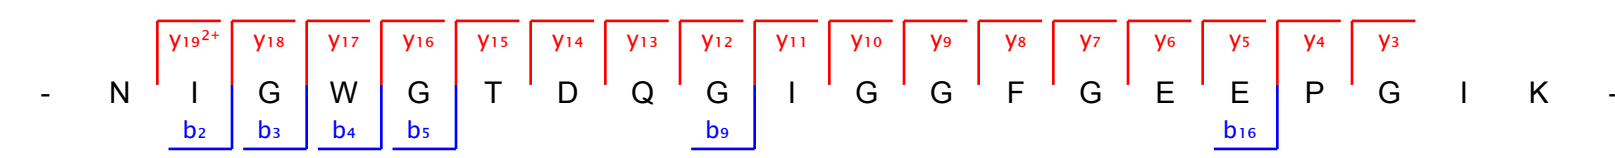

Raw file 20150307\_NSC1\_Top\_opt\_F1\_01\_1678 Scan 55459 Method TOF; CID Score 49.12 m/z 882.45 Gene names Sema4b

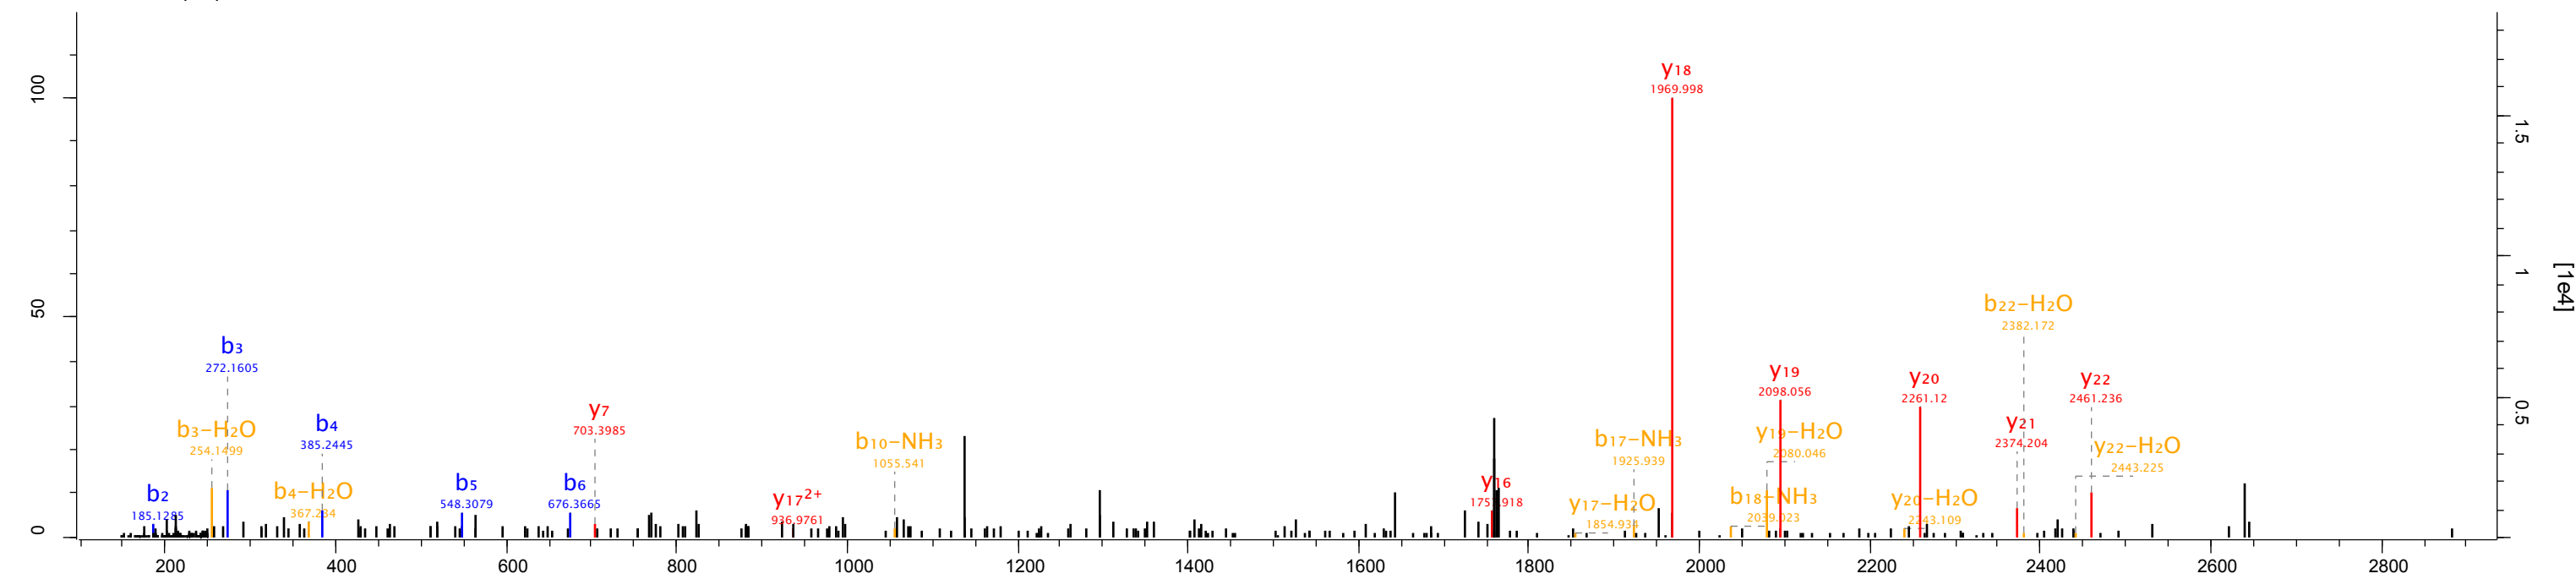

- L A S L Y Q P D L A S R P W T Q D I E G A S V K -

Fragmentation mapping:  
b2: A-S  
b3: S-L  
b4: L-Y  
b5: Y-Q  
b6: Q-P  
y7: D-I  
y16: L-E  
y17<sup>2+</sup>: D-E  
y18: P-I  
y19: Q-L  
y20: Y-L  
y21: L-S  
y22: S-A

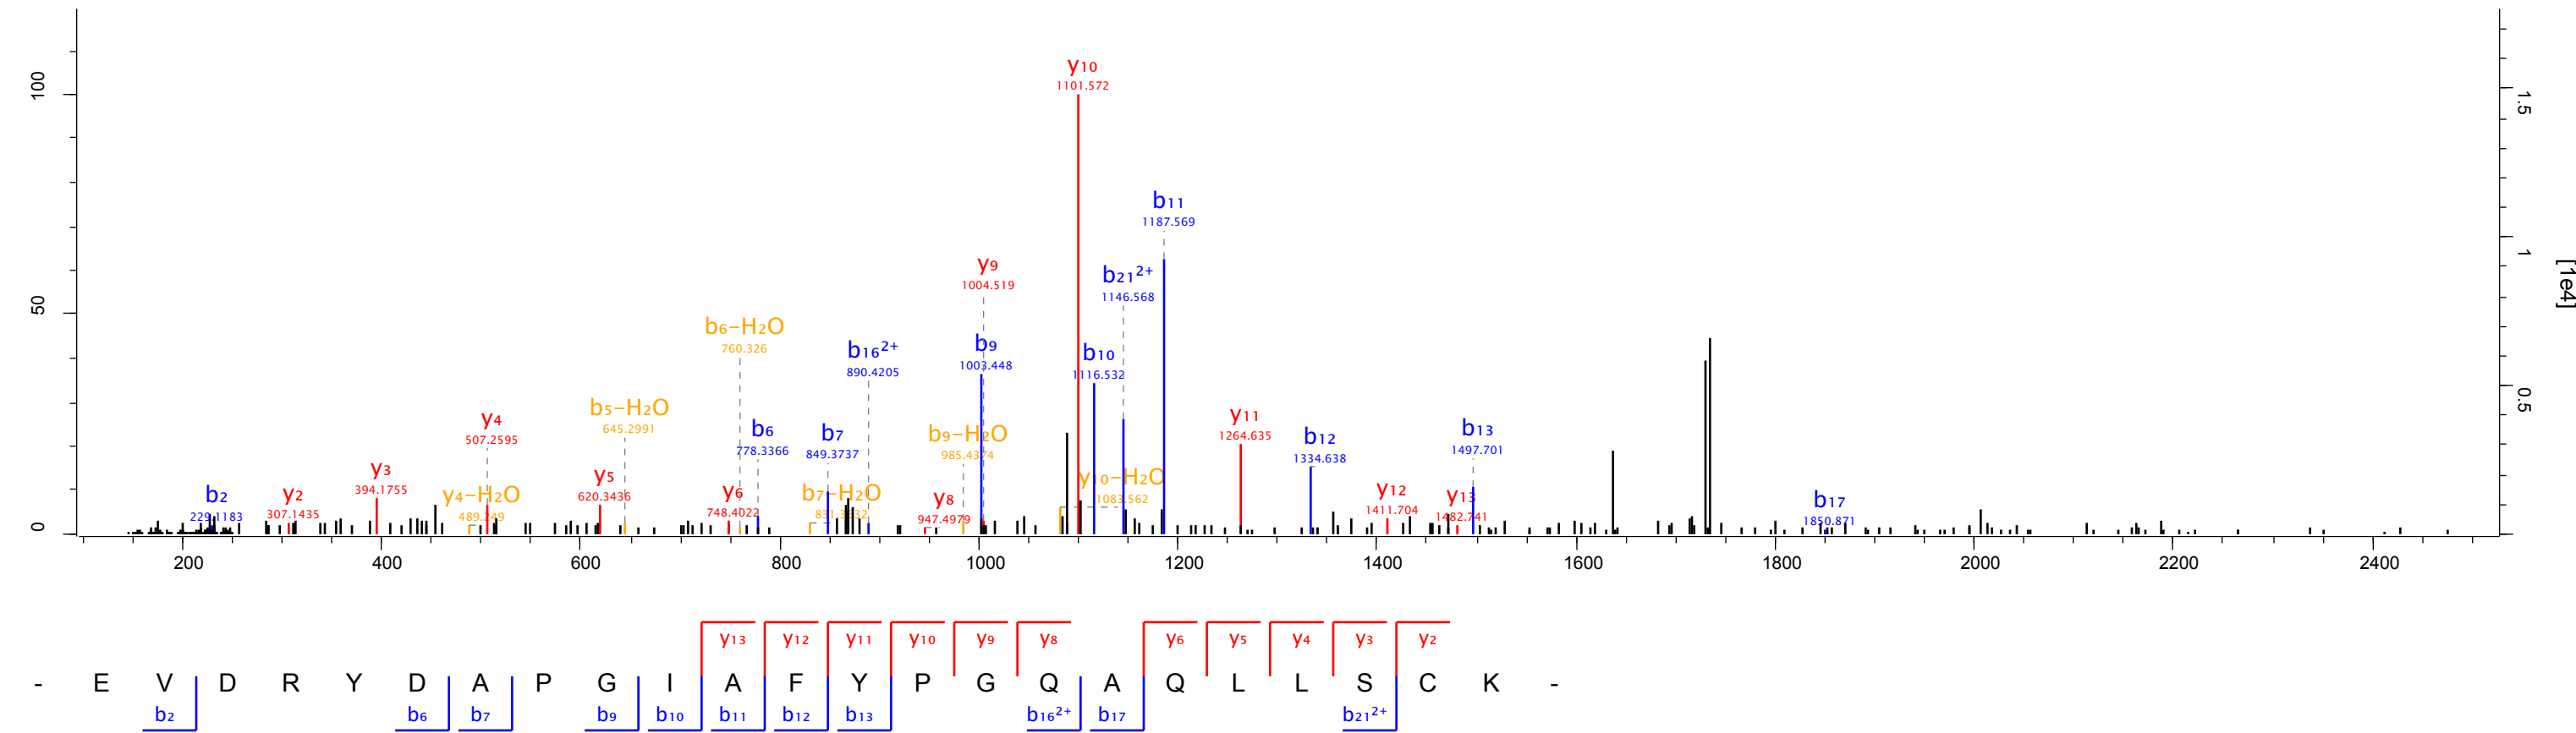



Raw file 20150307\_NSC1\_Top\_opt\_F1\_01\_1678 Scan 56985 Method TOF; CID Score 46.89 m/z 621.99 Gene names Pcif1

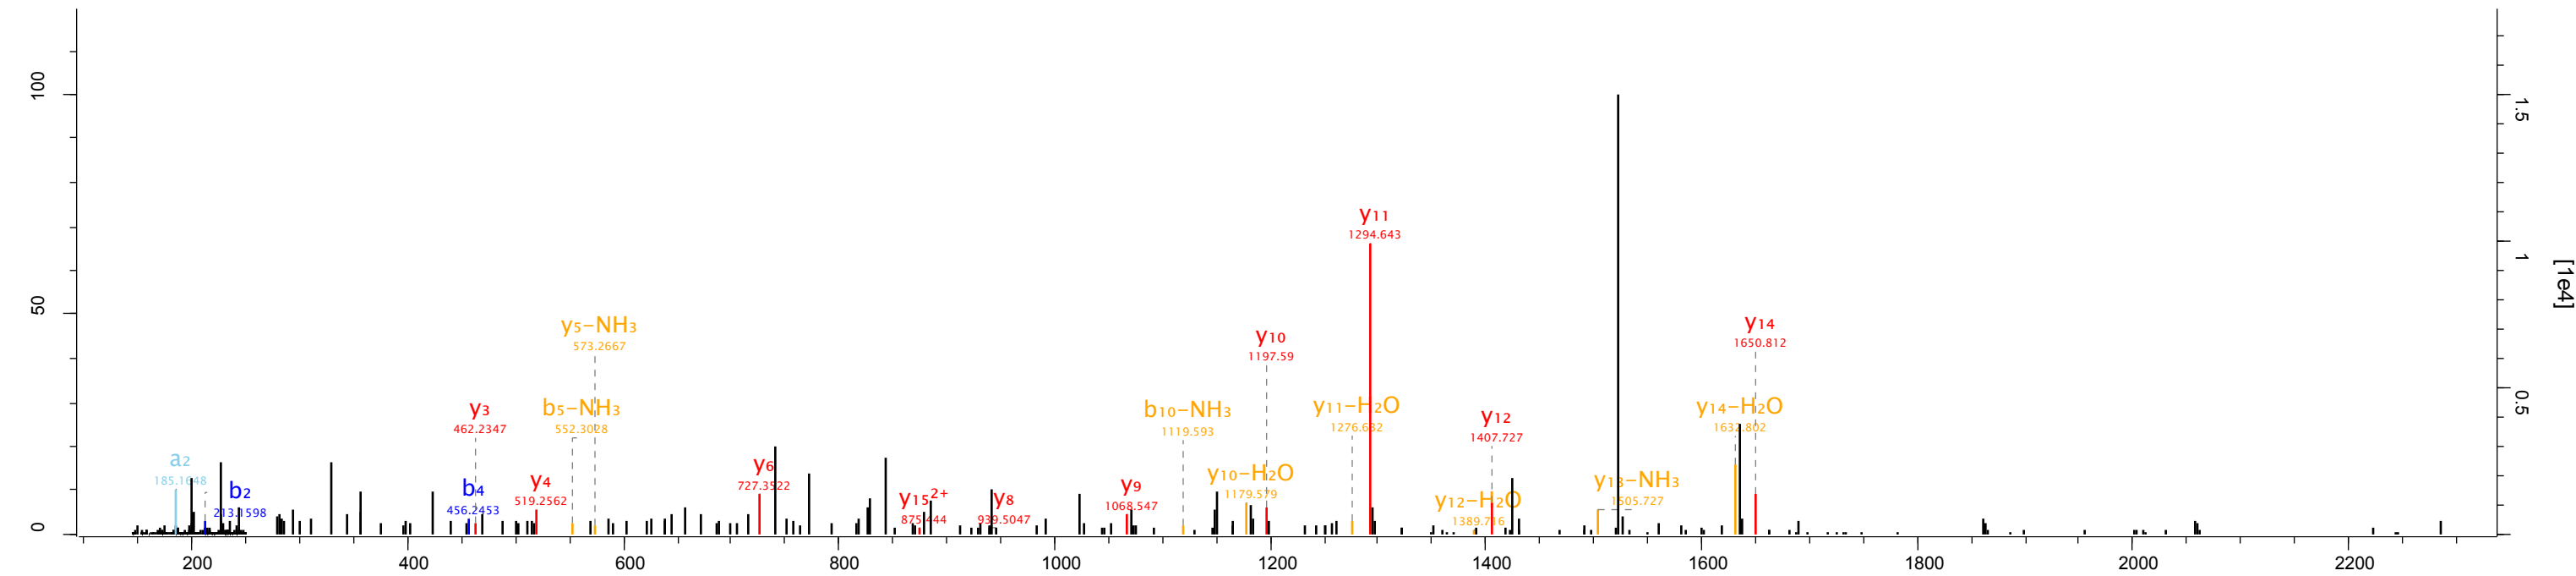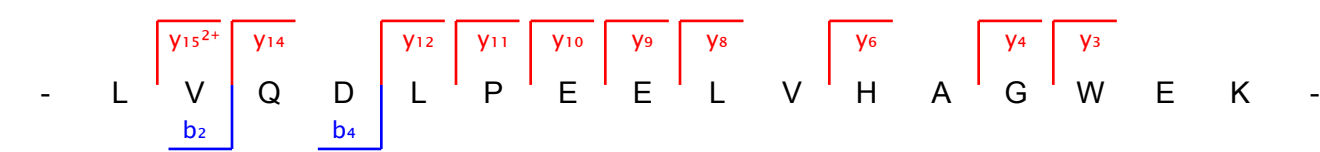

Raw file  
20150307\_NSC1\_Top\_opt\_F1\_01\_1678

Scan 61347 Method TOF; CID Score 68.68 m/z 715.34 Gene names Tmem55b

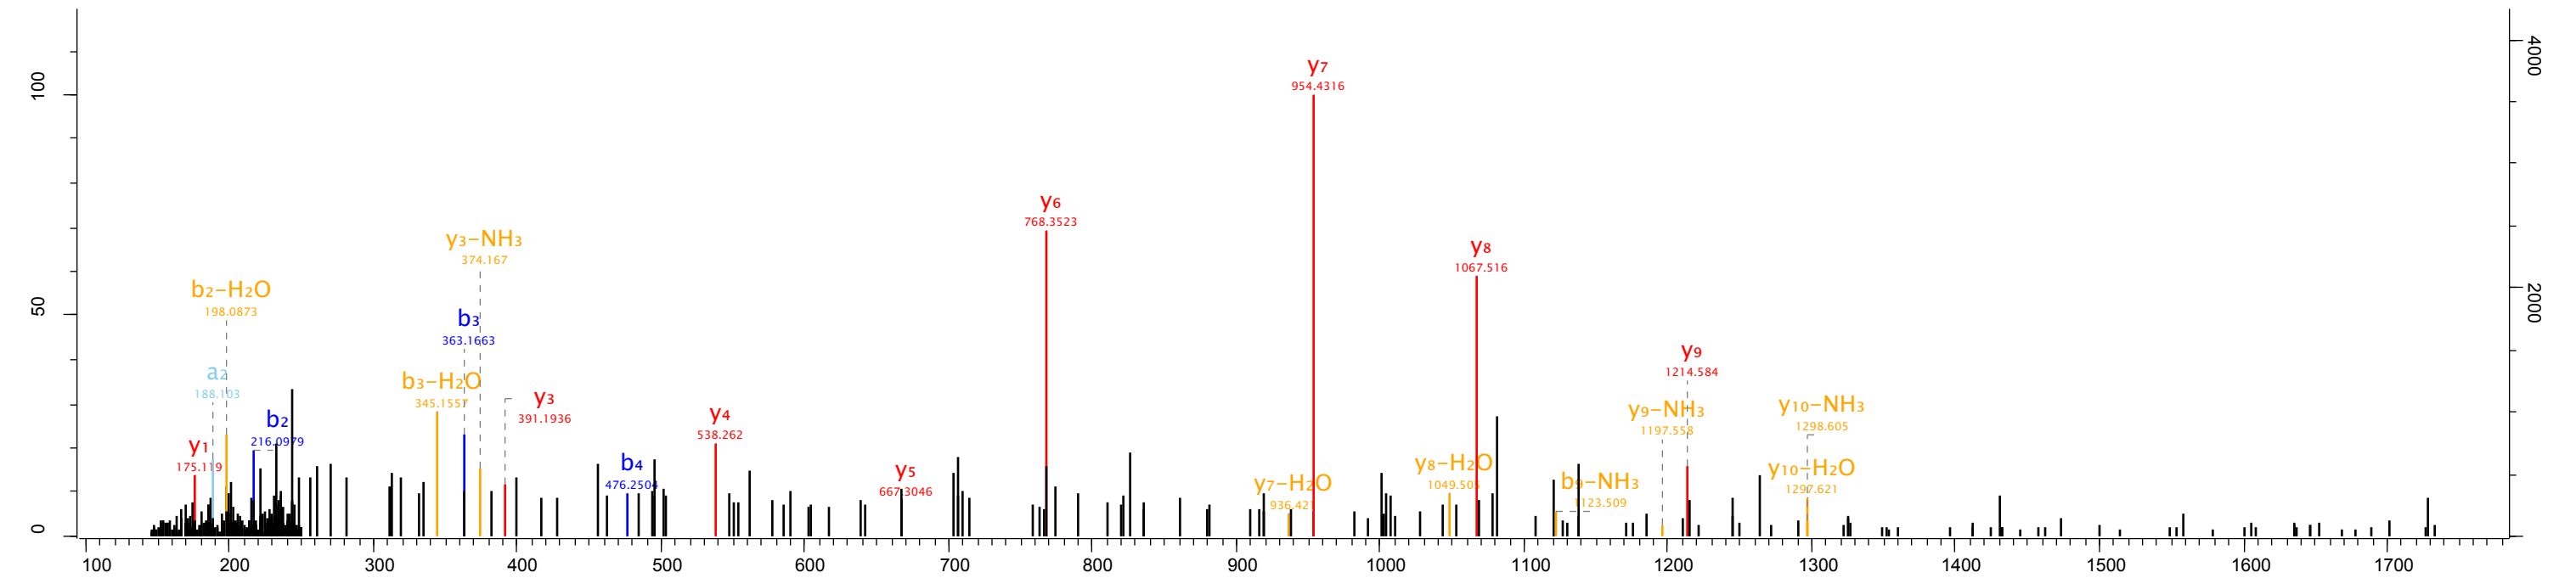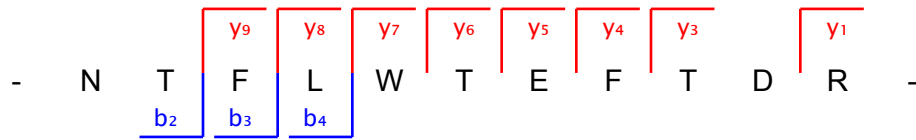

Raw file 20150307\_NSC1\_Top\_opt\_F1\_01\_1678 Scan 61742 Method TOF; CID Score 83.65 m/z 531.32 Gene names Stx16

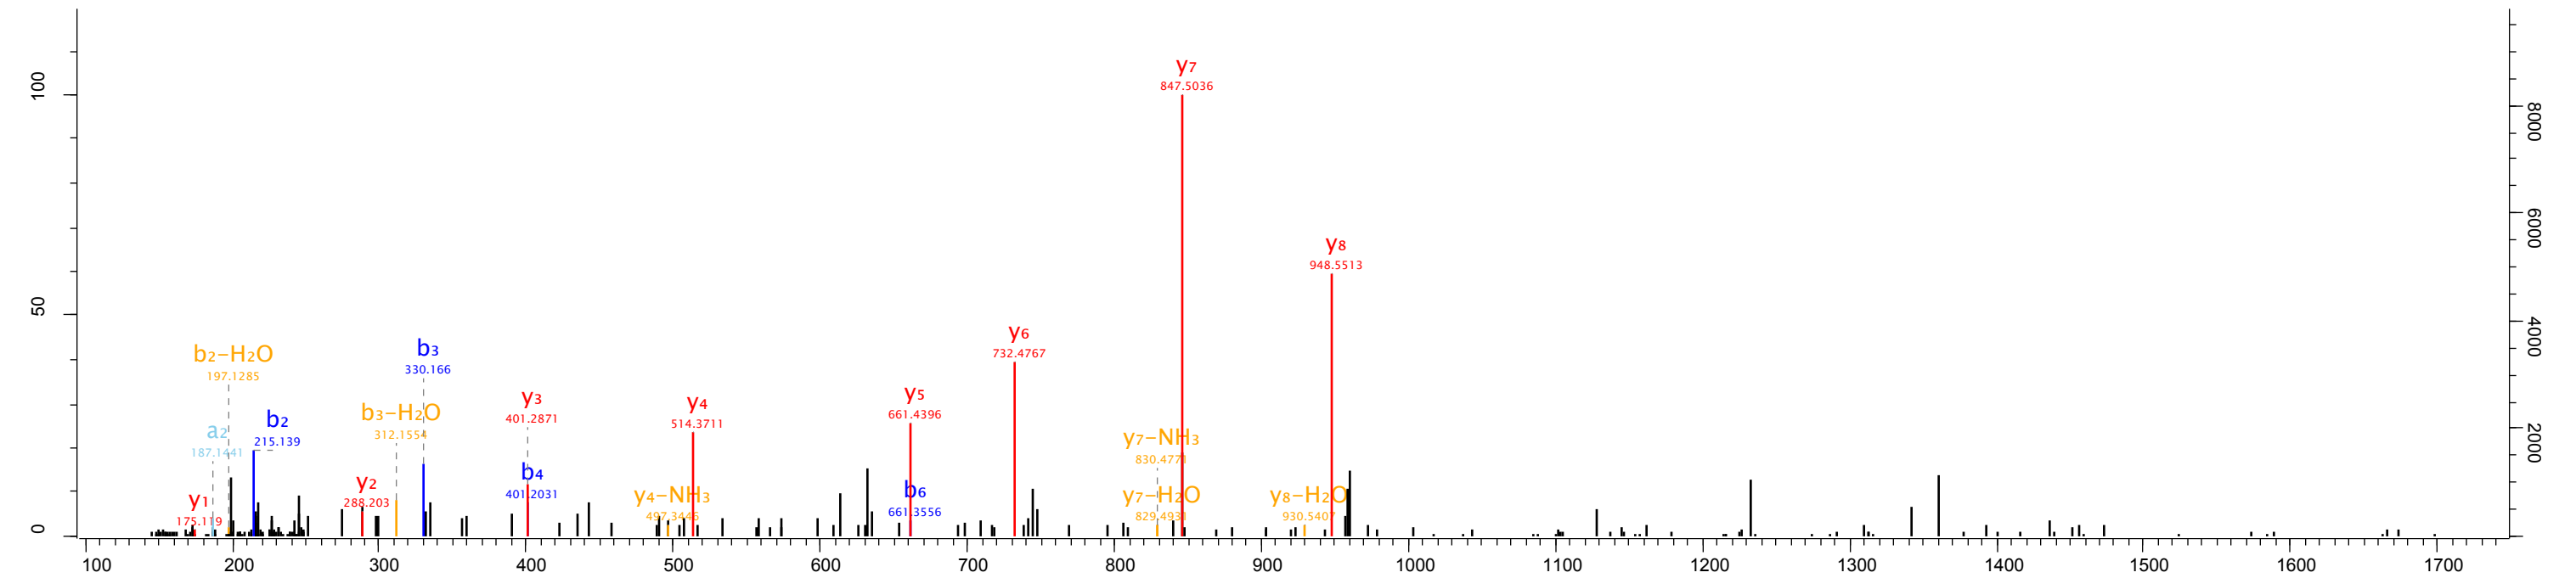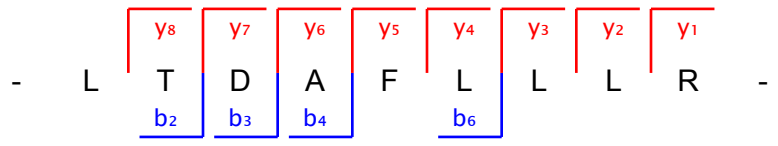

Raw file 20150307\_NSC1\_Top\_opt\_F1\_01\_1678 Scan 62123 Method TOF; CID Score 75.44 m/z 1038.86 Gene names Mrpl2

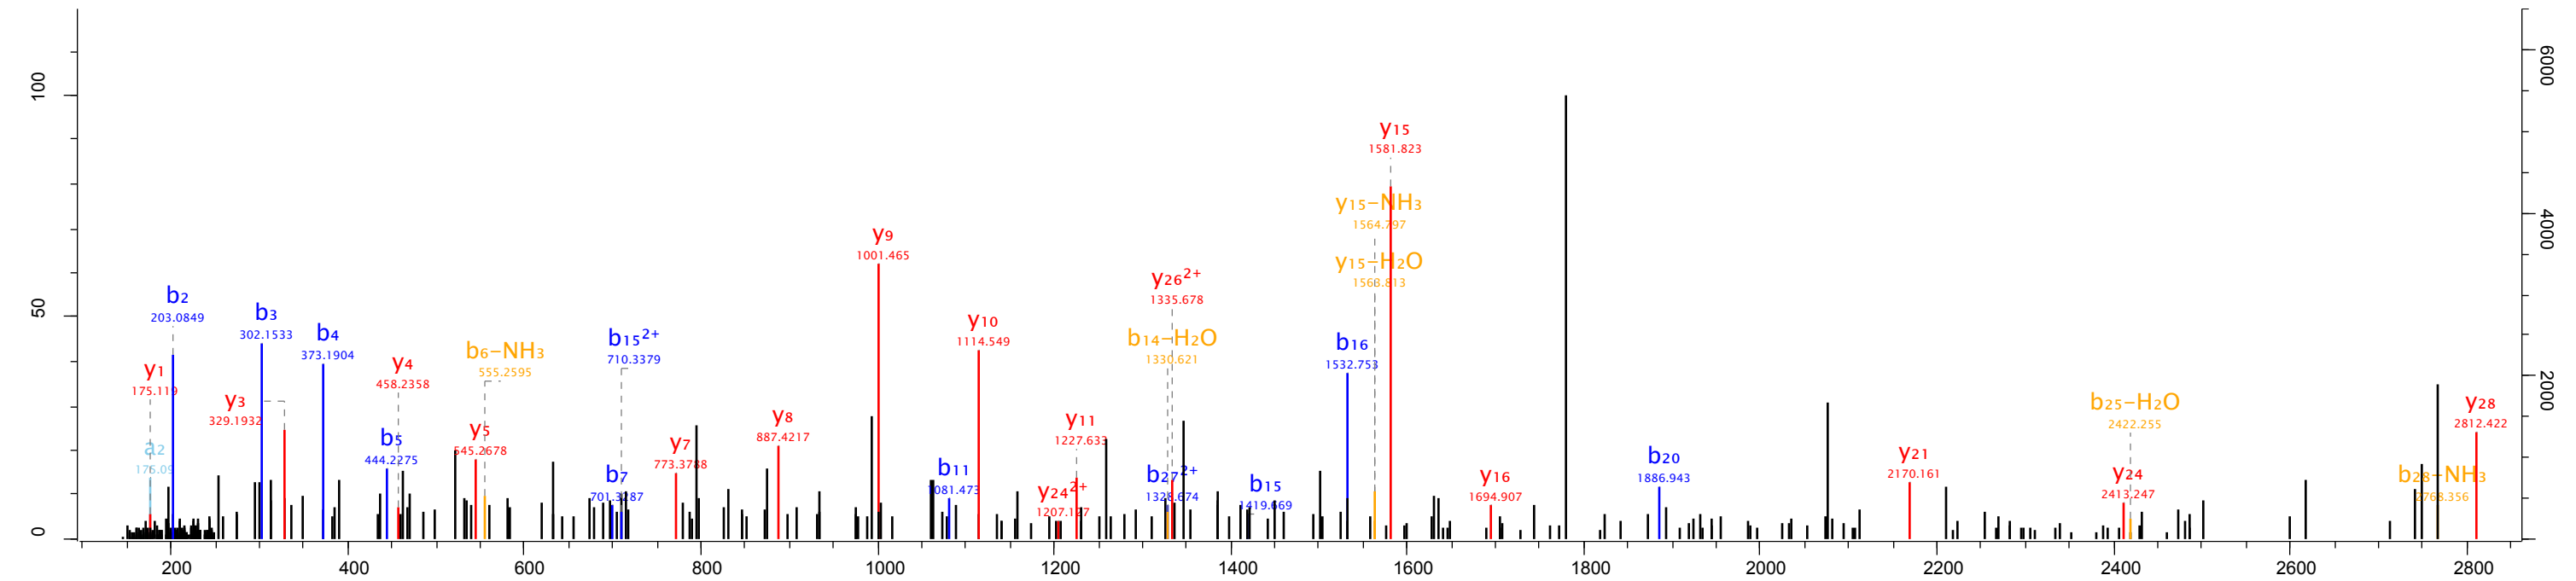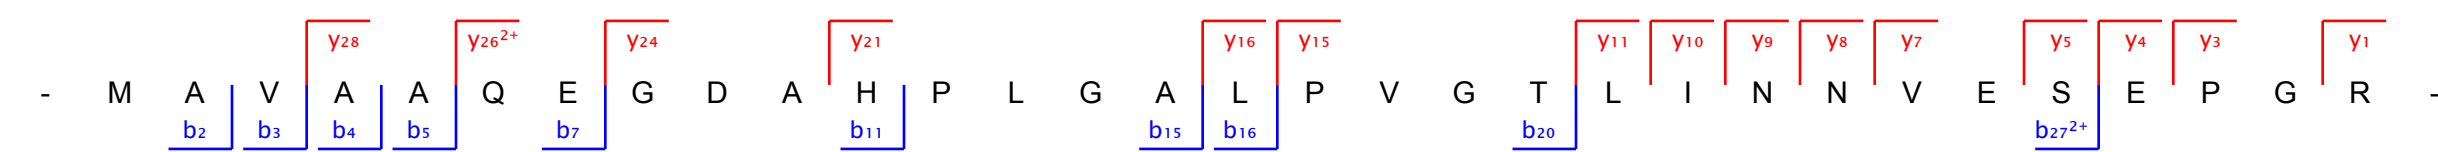

Raw file 20150307\_NSC1\_Top\_opt\_F1\_01\_1678 Scan 62249 Method TOF; CID Score 63.38 m/z 884.4 Gene names Chchd10

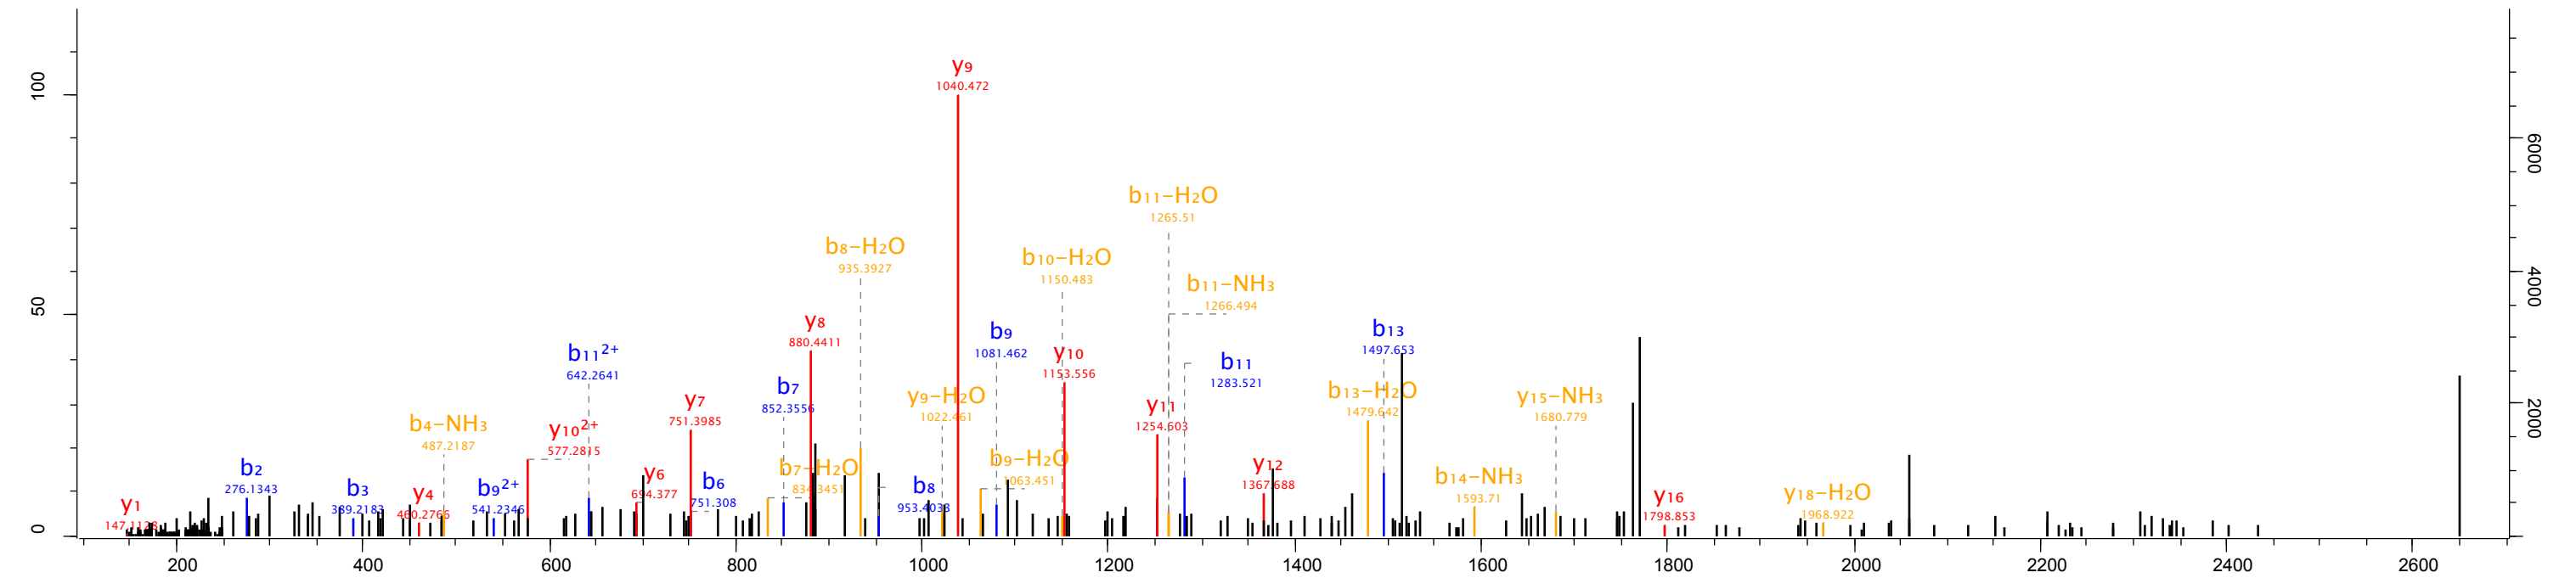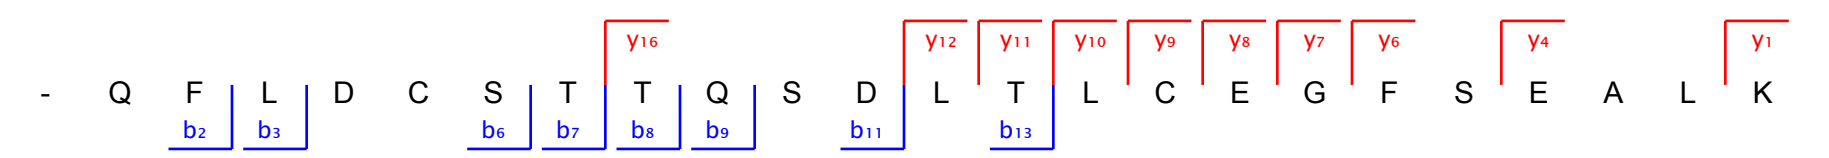

Raw file  
20150307\_NSC1\_Top\_opt\_F1\_01\_1678

Scan 66028 Method TOF; CID Score 78.98 m/z 868.1 Gene names Xpr1

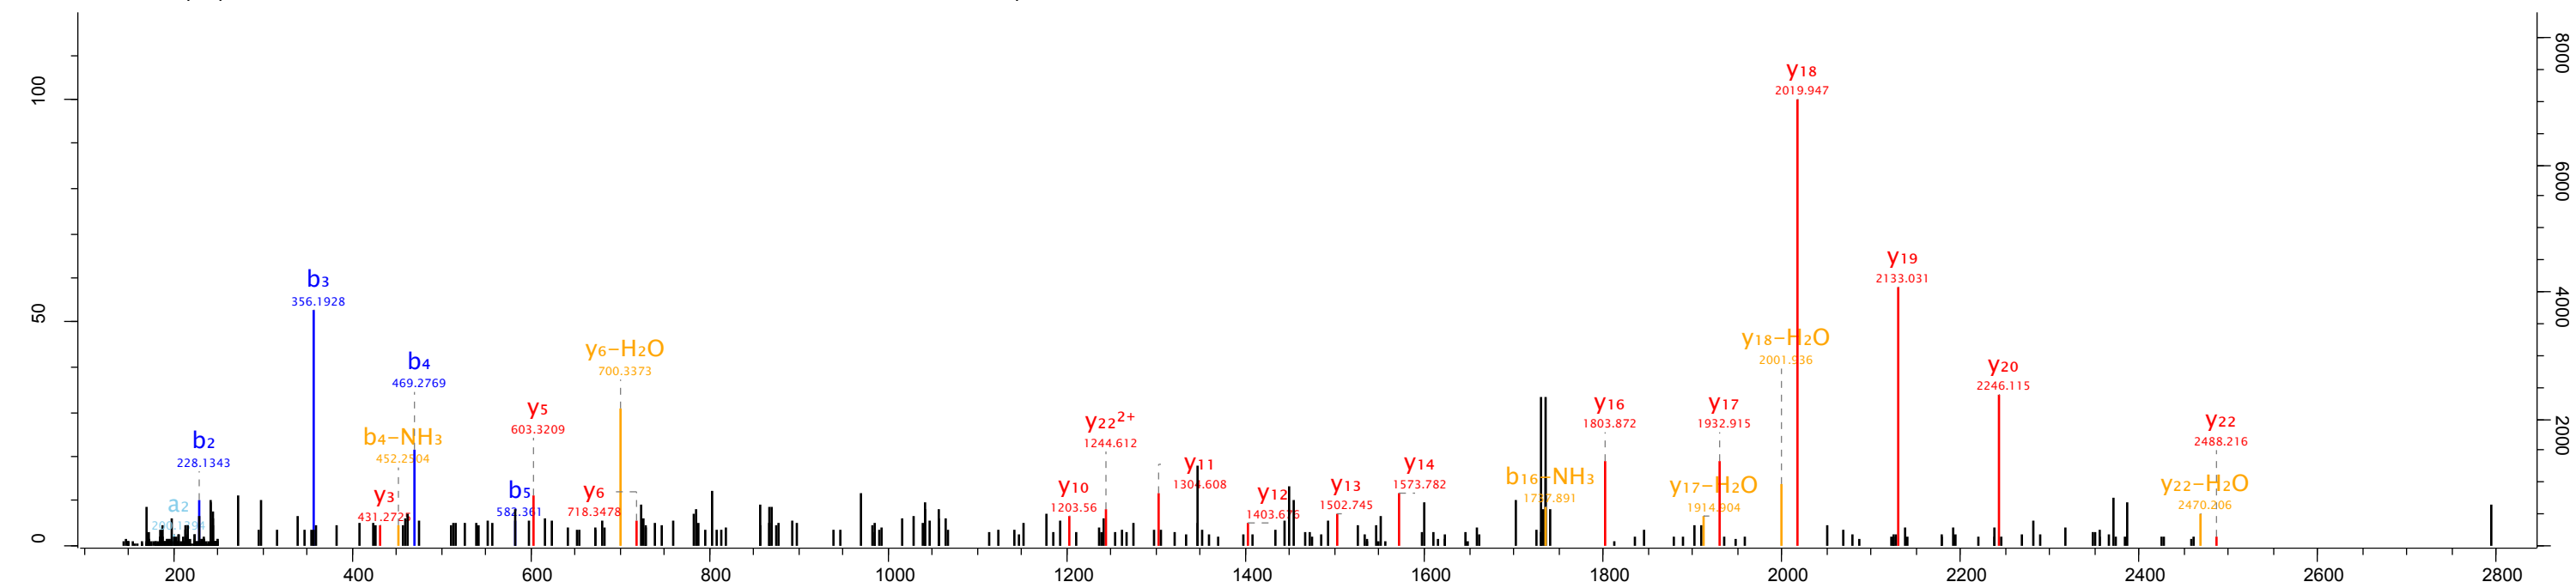

- I N Q L I S E T E A V V T N E L E D G D R Q K -

Fragmentation mapping:  
b2: N  
b3: Q  
b4: L  
b5: I  
y3: I  
y5: E  
y6: V  
y10: N  
y11: T  
y12: V  
y13: V  
y14: A  
y16: T  
y17: S  
y18: I  
y19: L  
y20: Q  
y22: D

Raw file  
20150307\_NSC1\_Top\_opt\_F1\_01\_1678

Scan 69983 Method TOF; CID Score 108.66 m/z 809.9 Gene names Elovl1

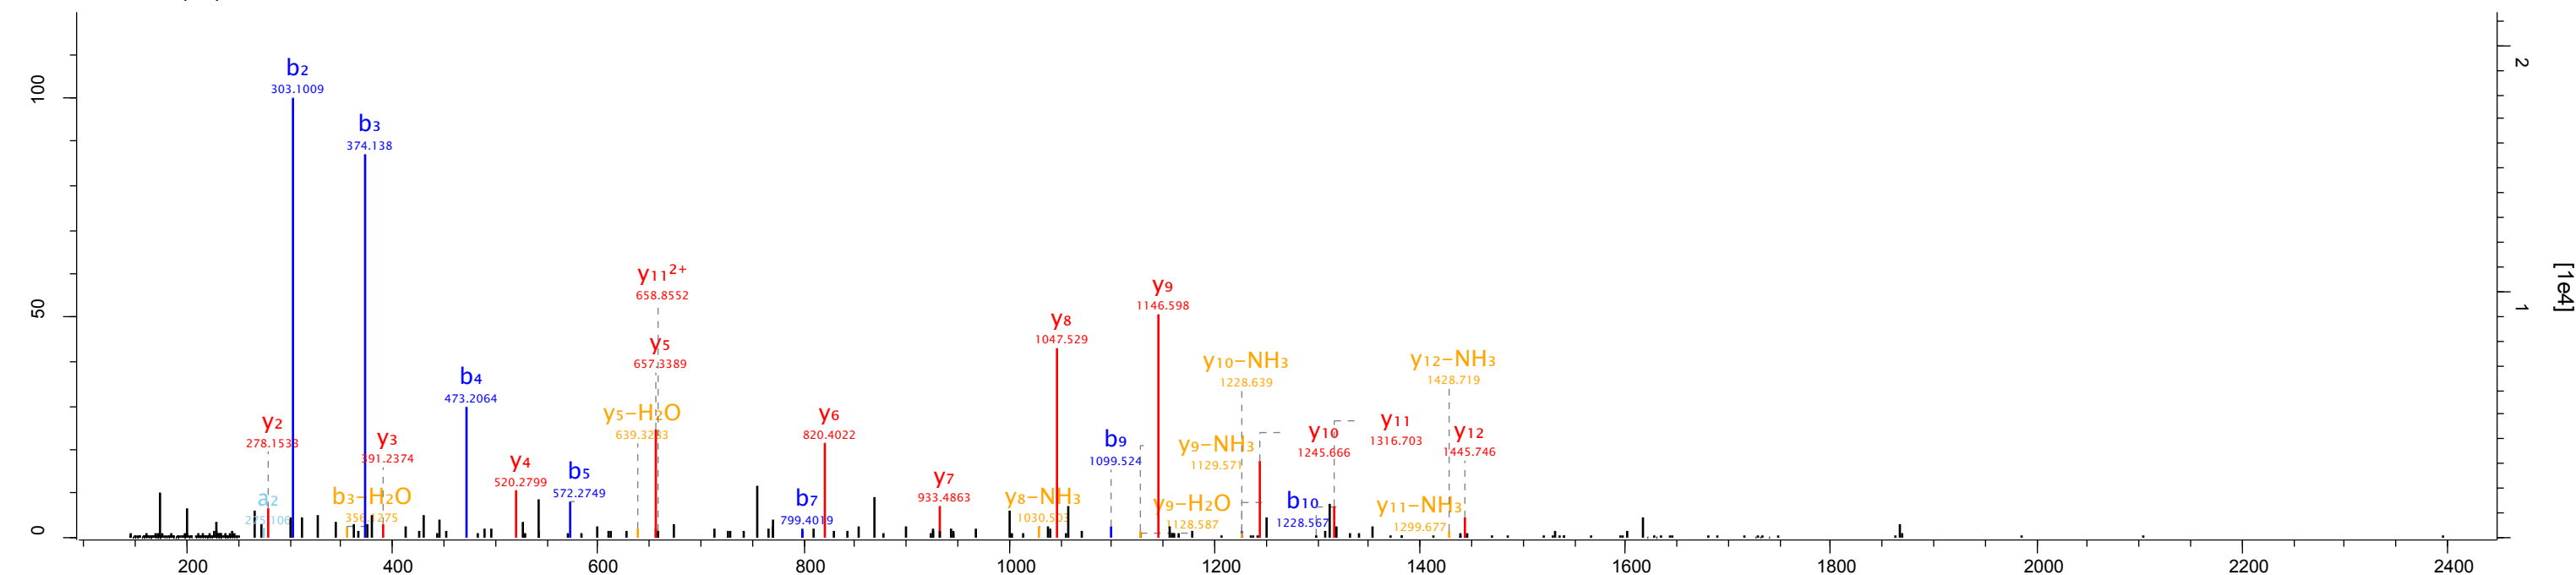

ac  
- M E A V V N L Y H E L M K -

Fragmentation scheme diagram showing amino acid sequence: M E A V V N L Y H E L M K. The sequence is divided into segments by brackets, with b-ions (blue) and y-ions (red) labeled above and below the segments. The b-ions are labeled b<sub>2</sub> through b<sub>10</sub>, and the y-ions are labeled y<sub>2</sub> through y<sub>12</sub>.

Raw file 20150307\_NSC1\_Top\_opt\_F1\_01\_1685 Scan 10683 Method TOF; CID Score 55.58 m/z 433.54 Gene names Sfl

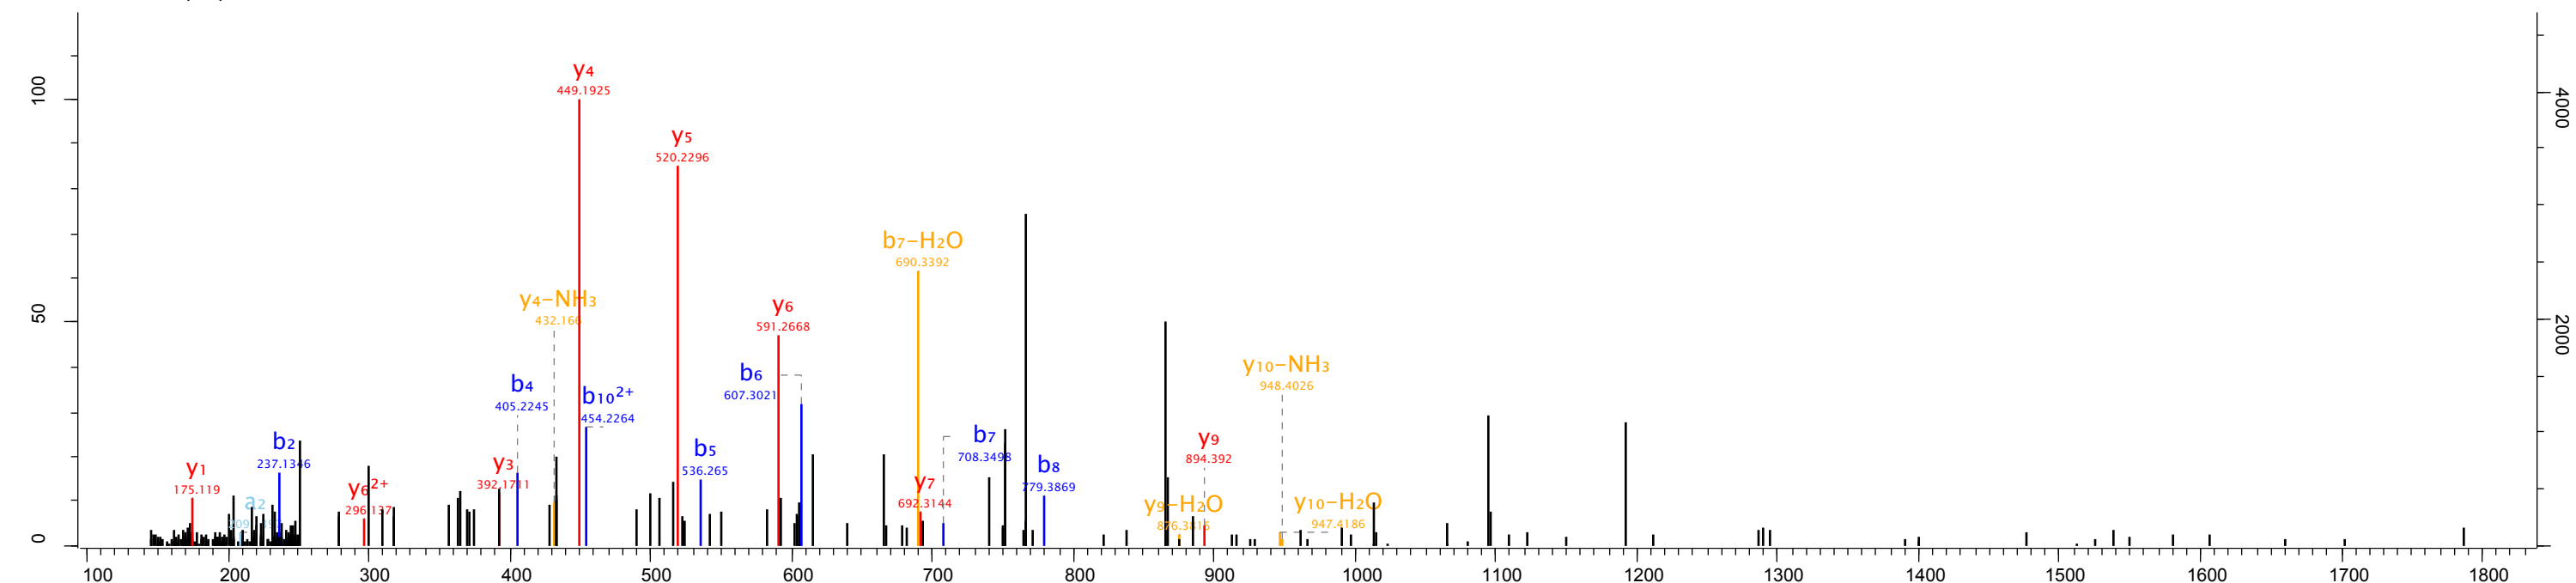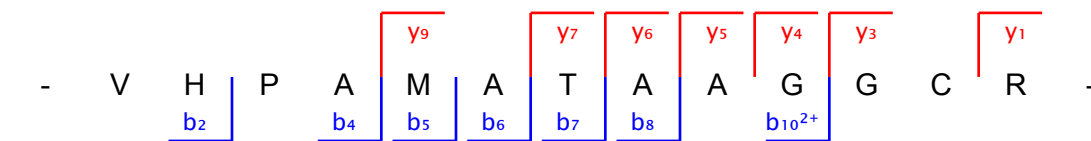



Raw file 20150307\_NSC1\_Top\_opt\_F1\_01\_1685 Scan 13401 Method TOF; CID Score 54.9 m/z 590.28 Gene names Tmem56

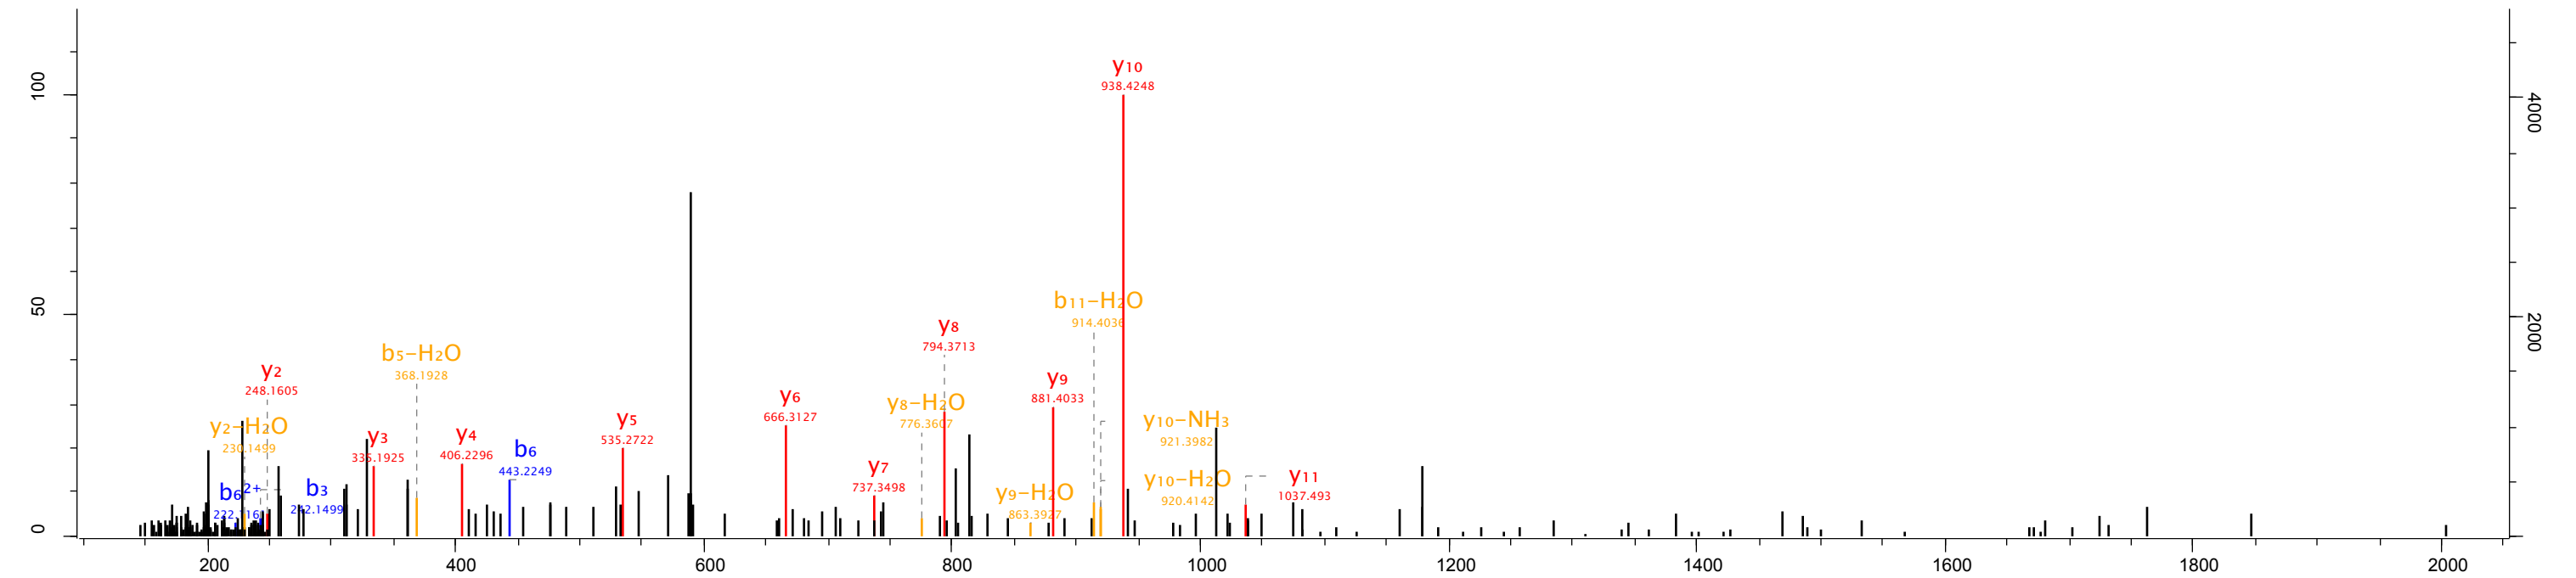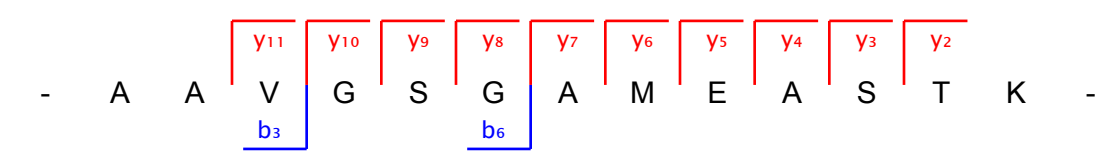

Raw file 20150307\_NSC1\_Top\_opt\_F1\_01\_1685 Scan 15799 Method TOF; CID Score 100.28 m/z 839.41 Gene names Crls1

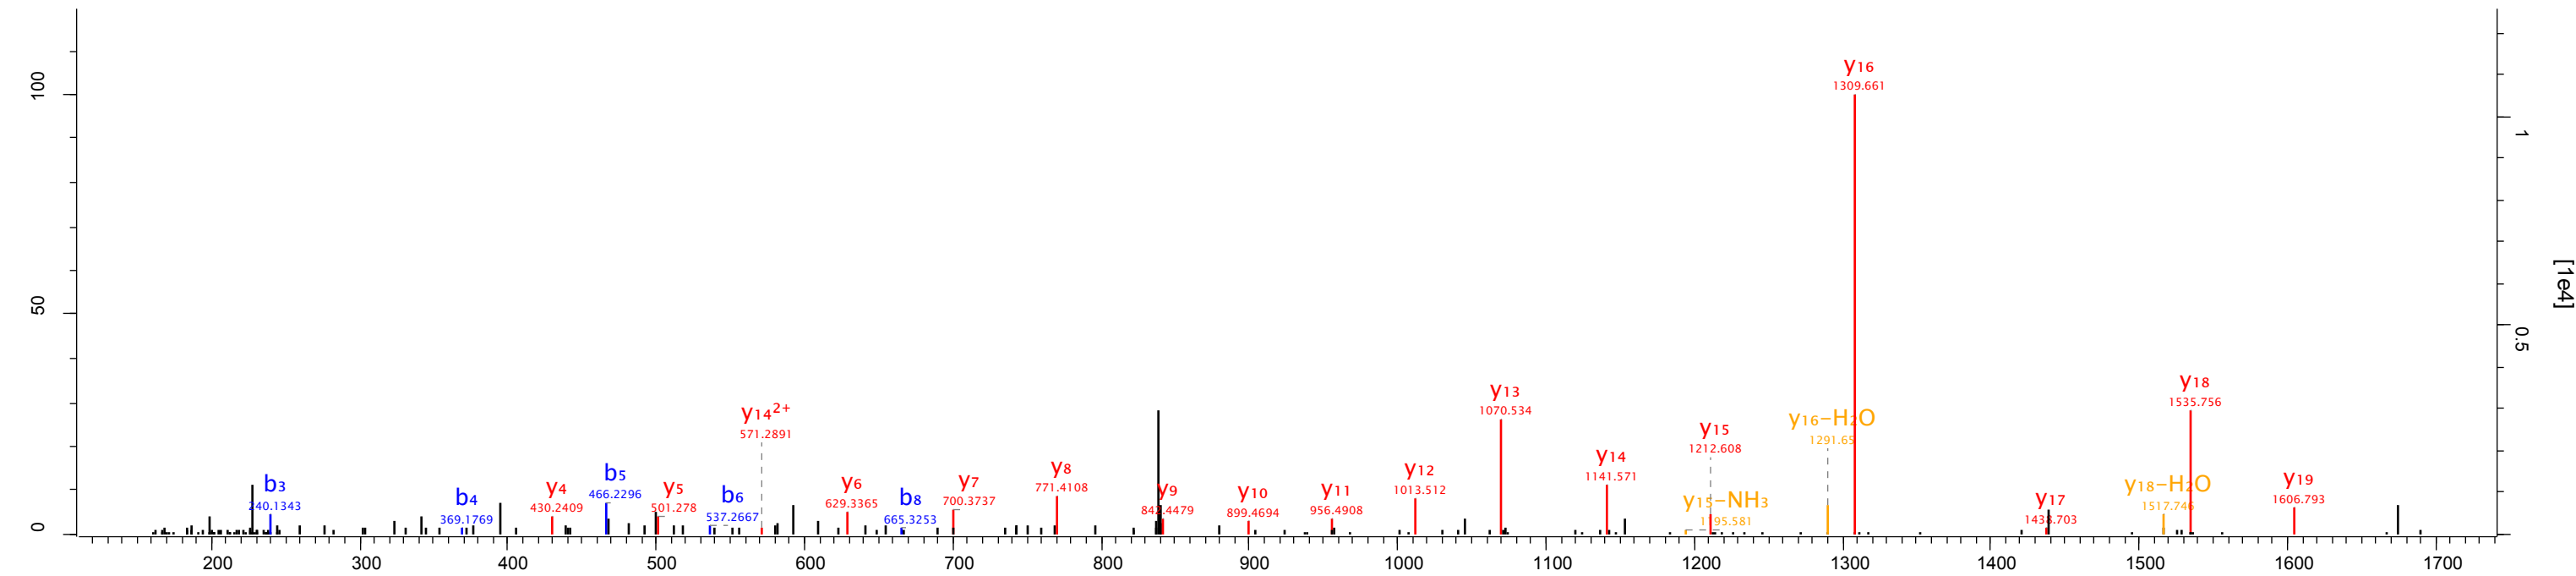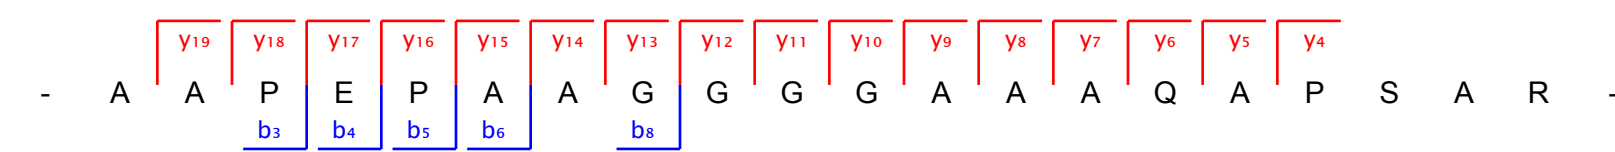

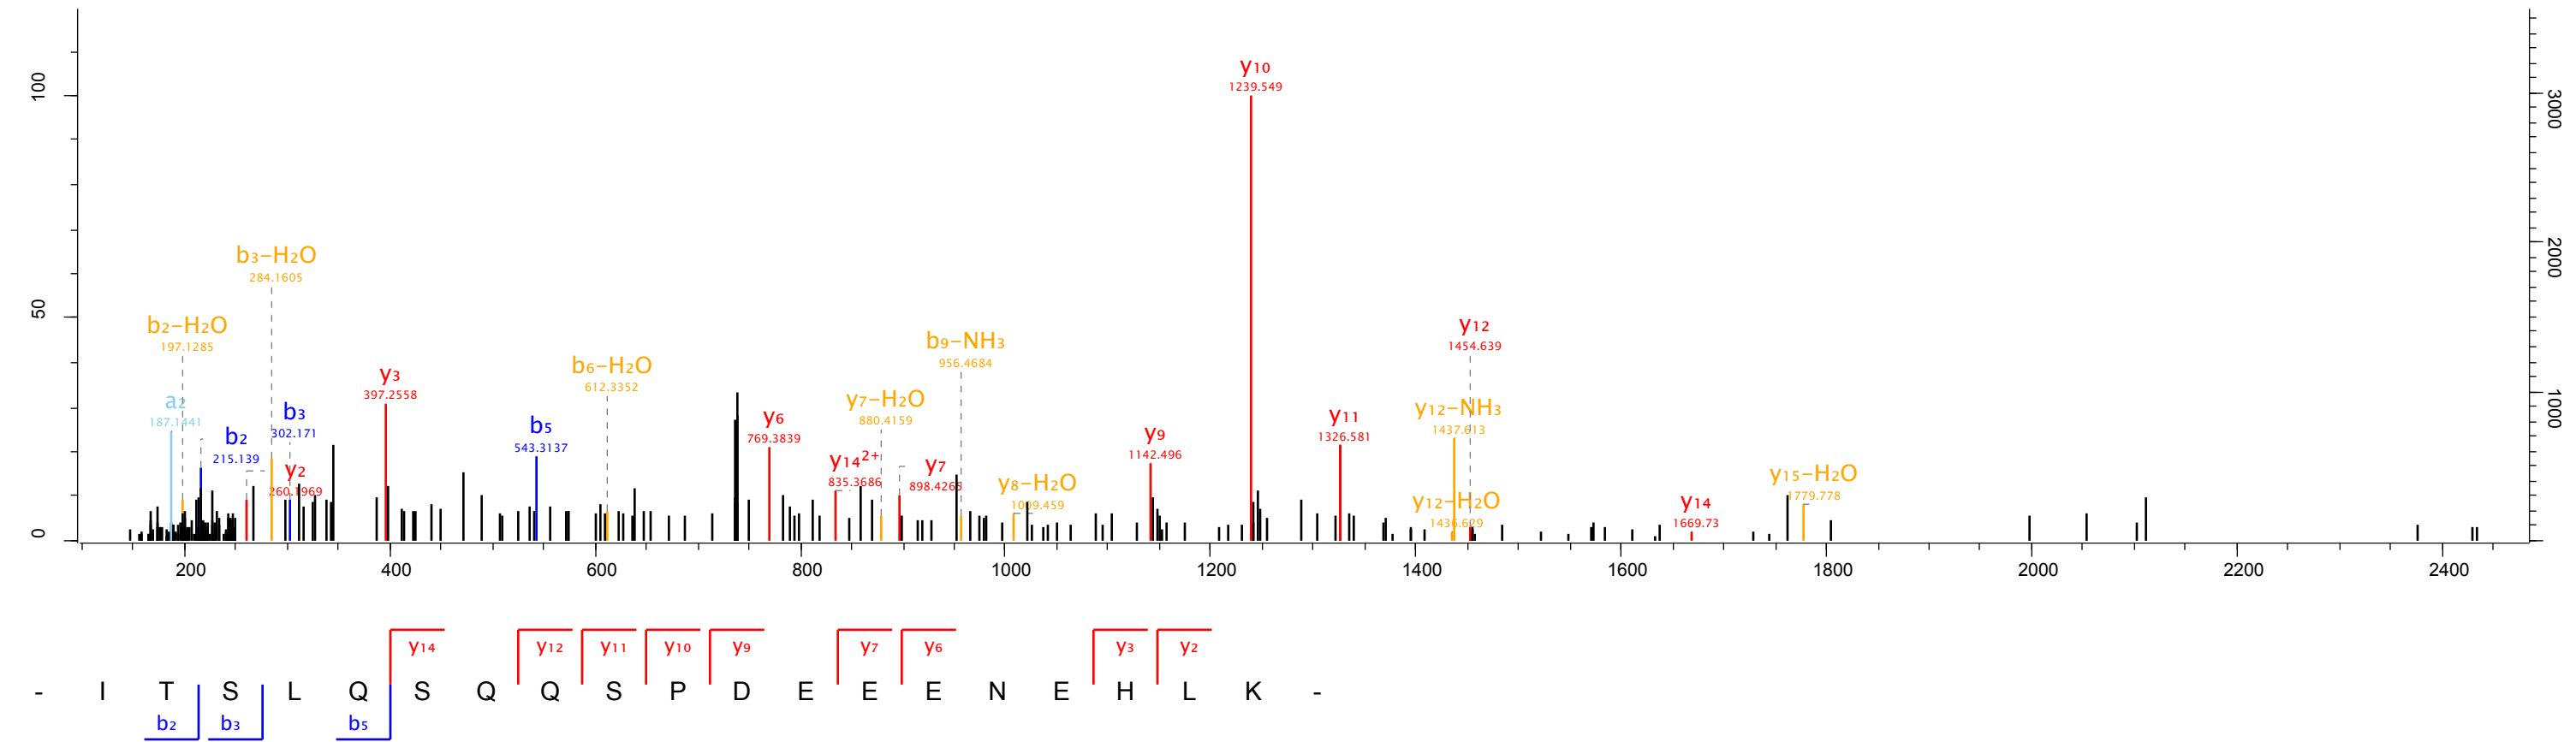

Raw file 20150307\_NSC1\_Top\_opt\_F1\_01\_1685 Scan 24586 Method TOF; CID Score 93.16 m/z 672.36 Gene names Sh3bp5l

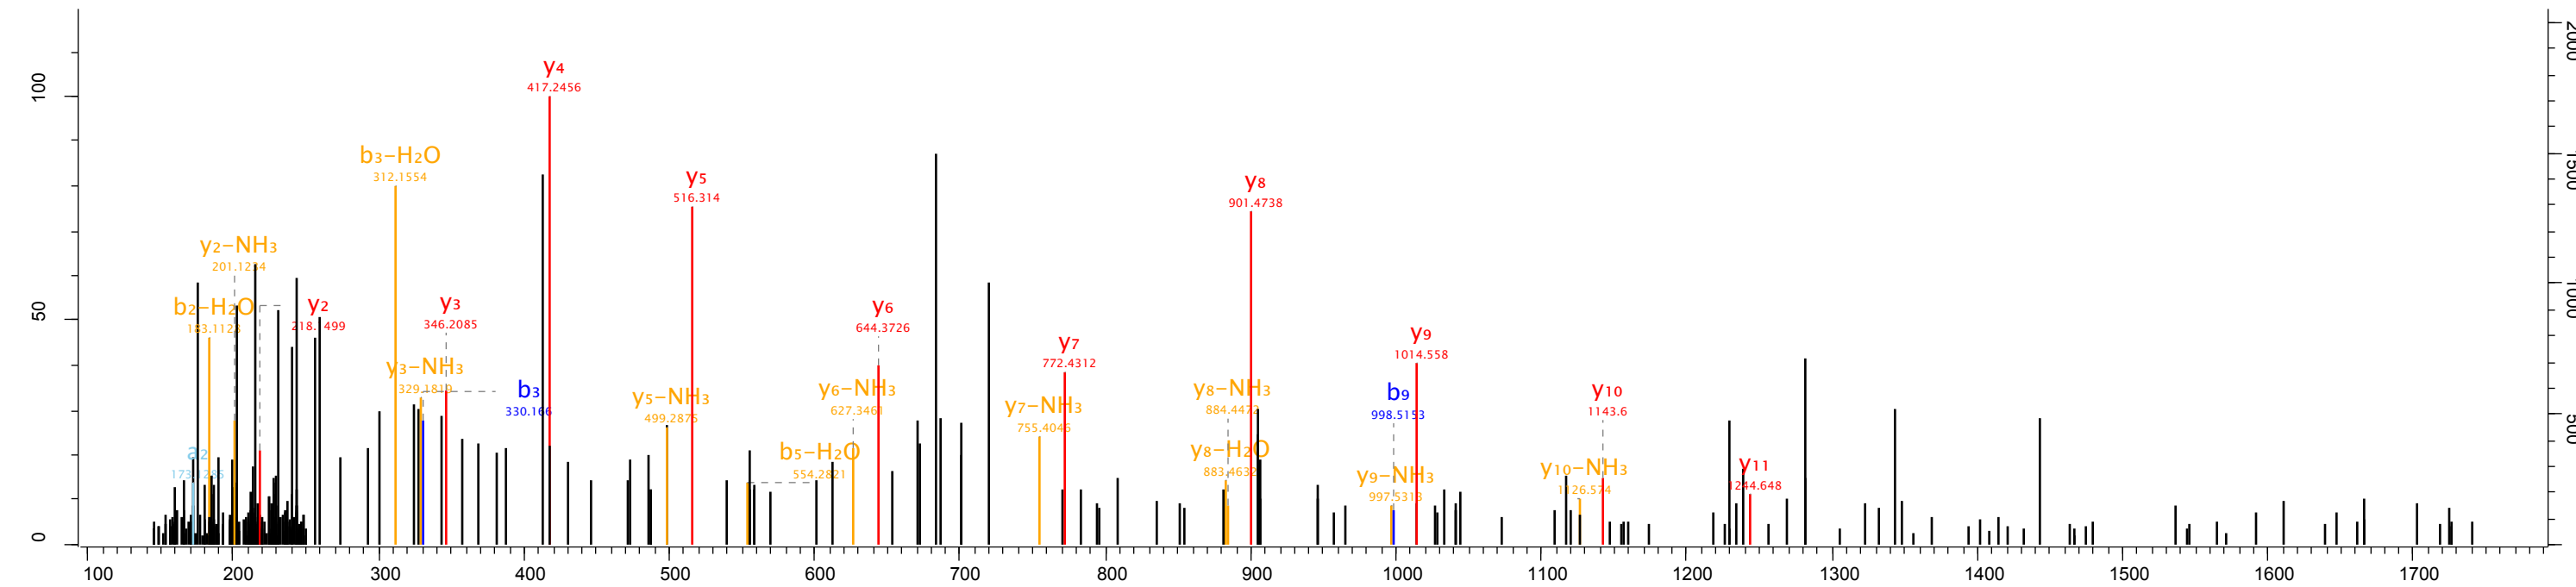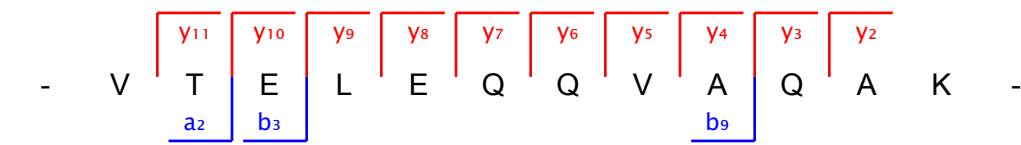

Raw file  
20150307\_NSC1\_Top\_opt\_F1\_01\_1685

Scan 31535 Method TOF; CID Score 43.95 m/z 661.32 Gene names Atrnl1

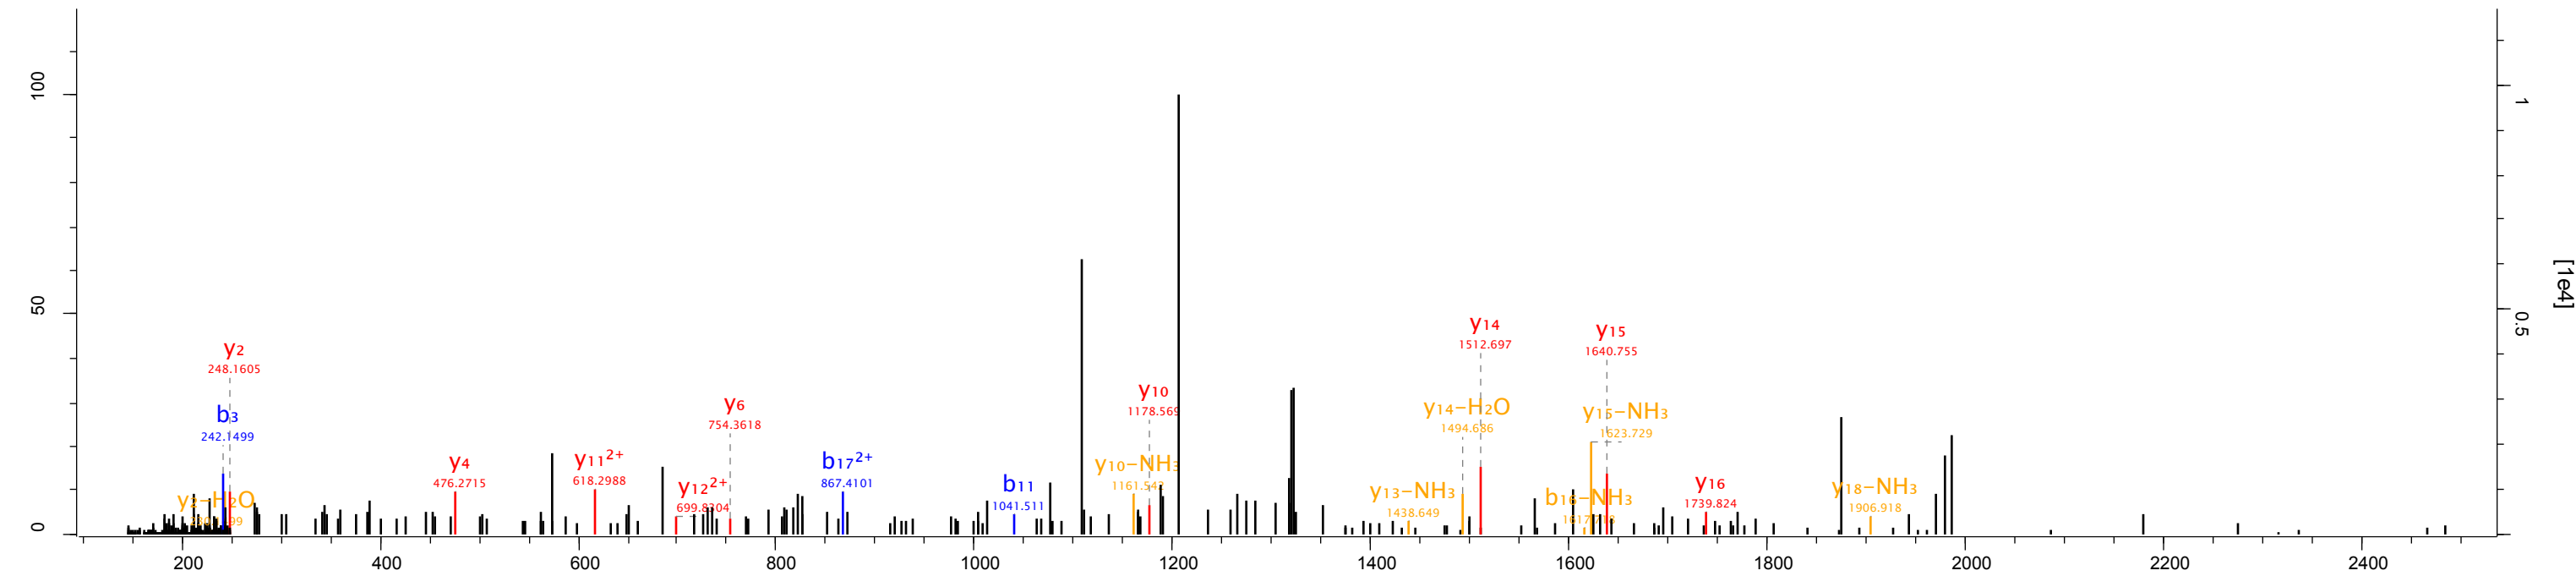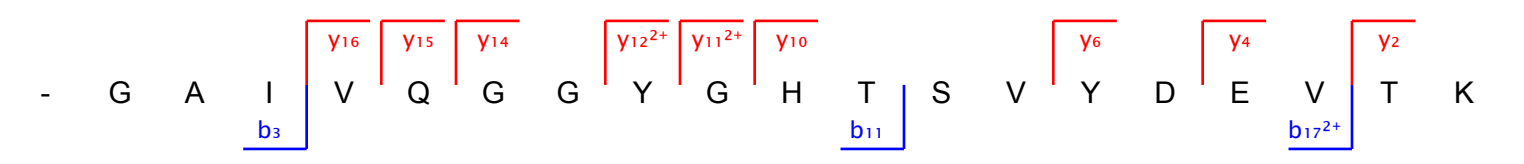

Raw file 20150307\_NSC1\_Top\_opt\_F1\_01\_1685 Scan 32424 Method TOF; CID Score 58.98 m/z 577.95 Gene names Bet11

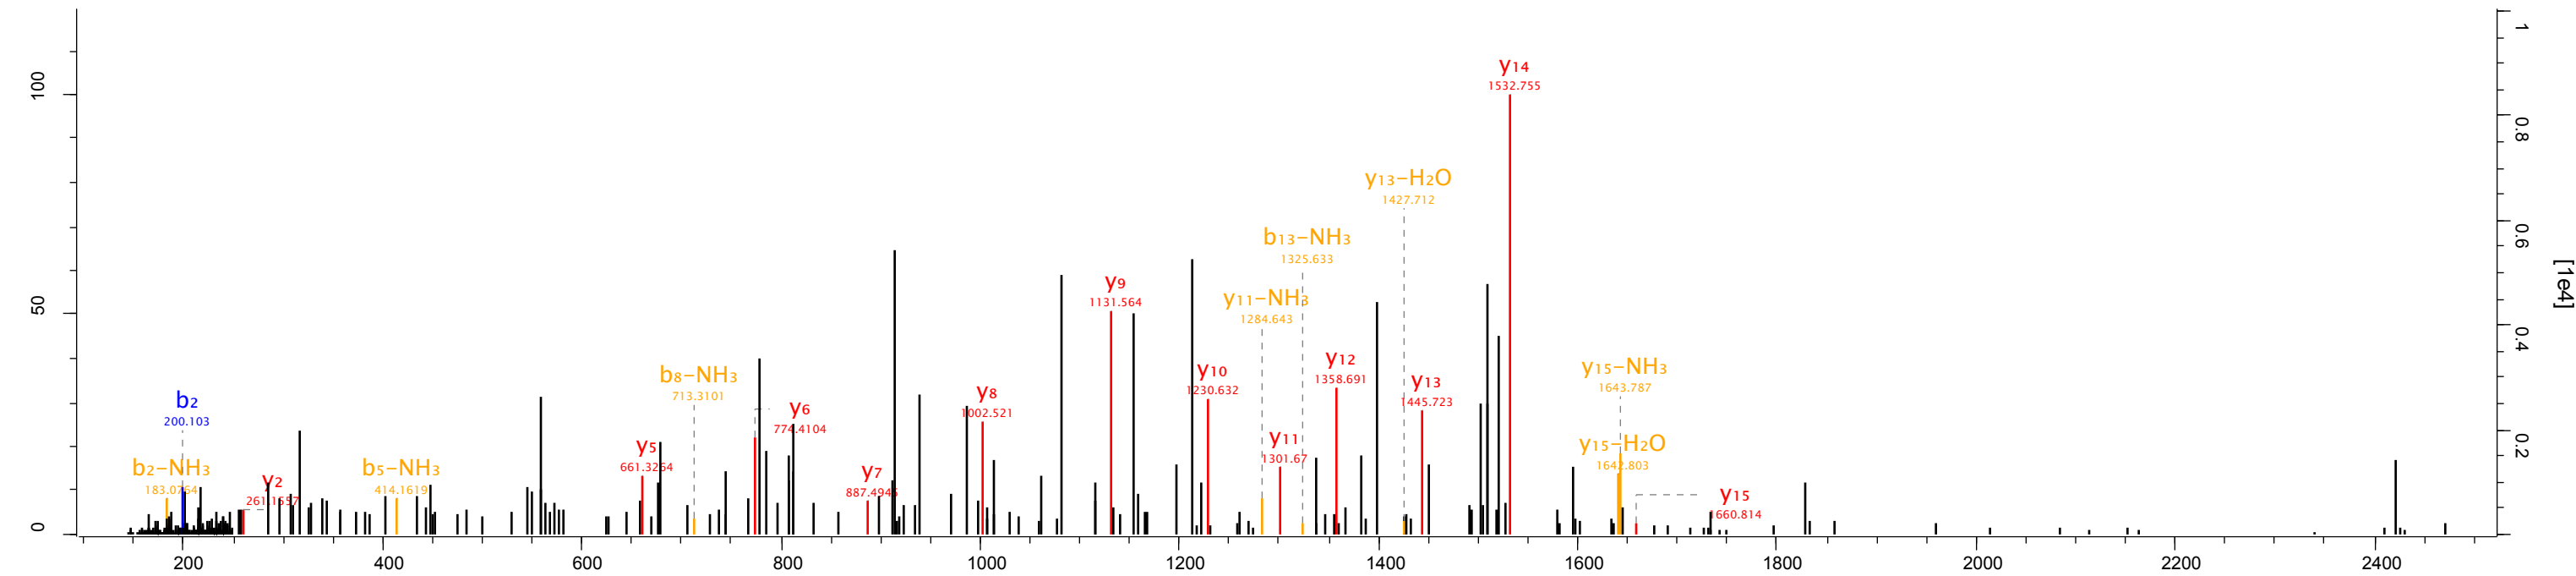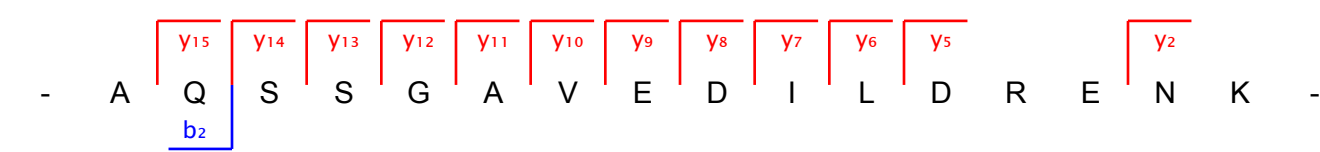

Raw file  
20150307\_NSC1\_Top\_opt\_F1\_01\_1685

Scan 34103 Method TOF; CID Score 91.48 m/z 872.41 Gene names Scyl3

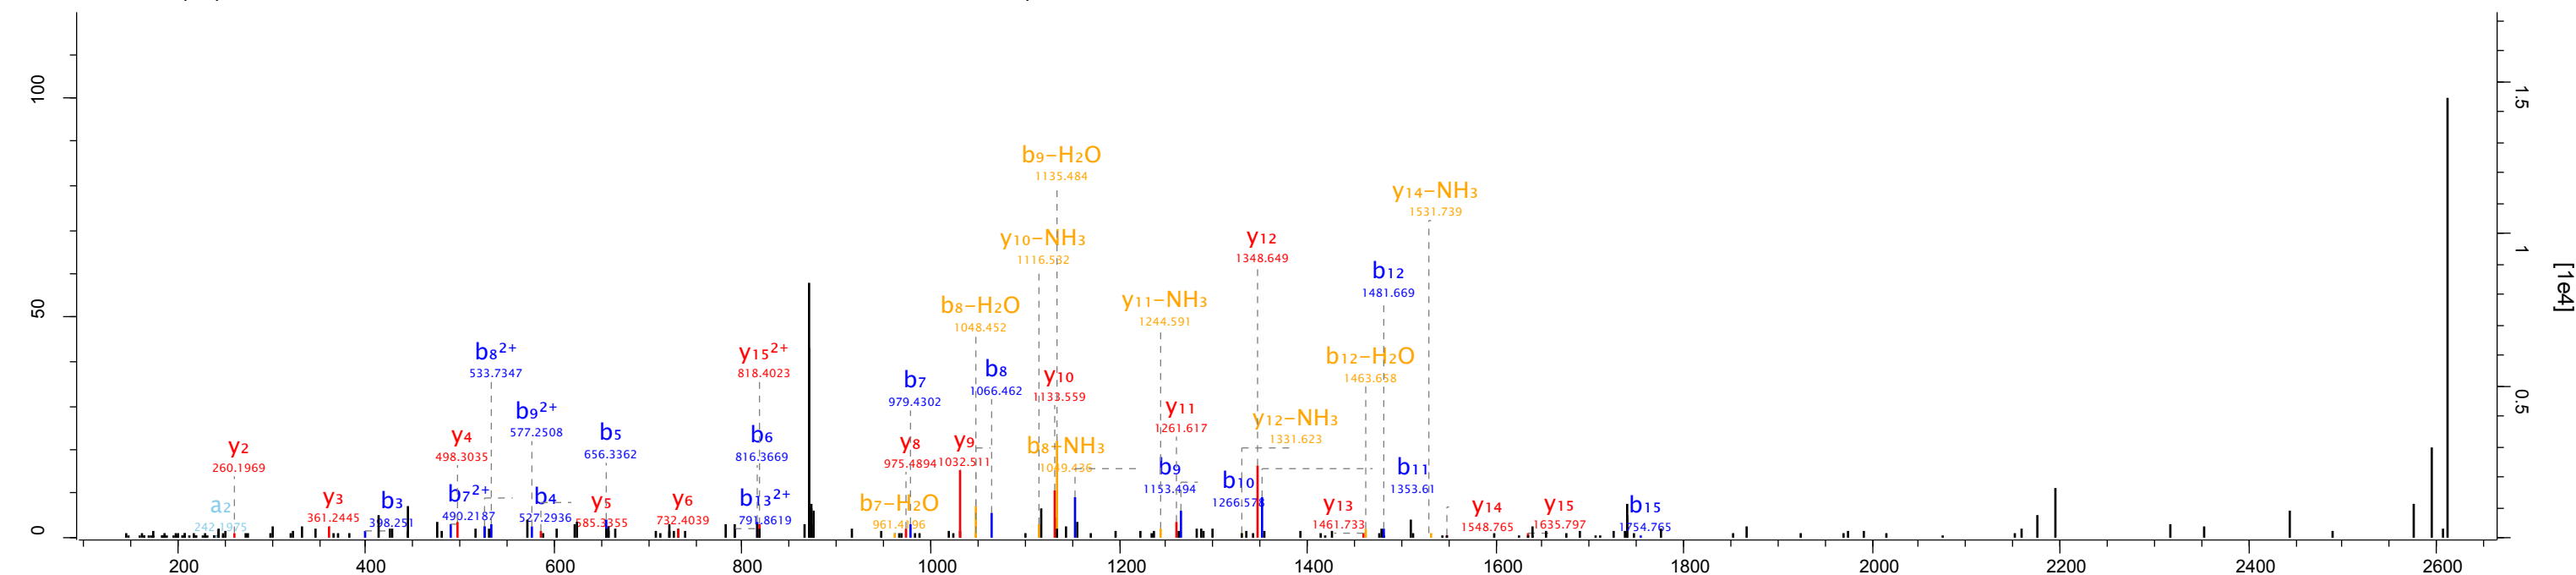

- R I Q E E C Y S S L S Q T G D Q F S H T I K -

Fragmentation mapping:  
a<sub>2</sub> (I), b<sub>3</sub> (Q), b<sub>4</sub> (E), b<sub>5</sub> (E), b<sub>6</sub> (C), b<sub>7</sub> (Y), b<sub>8</sub> (S), b<sub>9</sub> (S), b<sub>10</sub> (L), b<sub>11</sub> (S), b<sub>12</sub> (Q), b<sub>13</sub><sup>2+</sup> (T), b<sub>15</sub> (D), y<sub>2</sub> (I), y<sub>3</sub> (T), y<sub>4</sub> (H), y<sub>5</sub> (S), y<sub>6</sub> (F), y<sub>8</sub> (D), y<sub>9</sub> (G), y<sub>10</sub> (T), y<sub>11</sub> (Q), y<sub>12</sub> (S), y<sub>13</sub> (L), y<sub>14</sub> (S), y<sub>15</sub> (S)

Raw file 20150307\_NSC1\_Top\_opt\_F1\_01\_1685 Scan 35132 Method TOF; CID Score 53.45 m/z 614.34 Gene names Adarb1

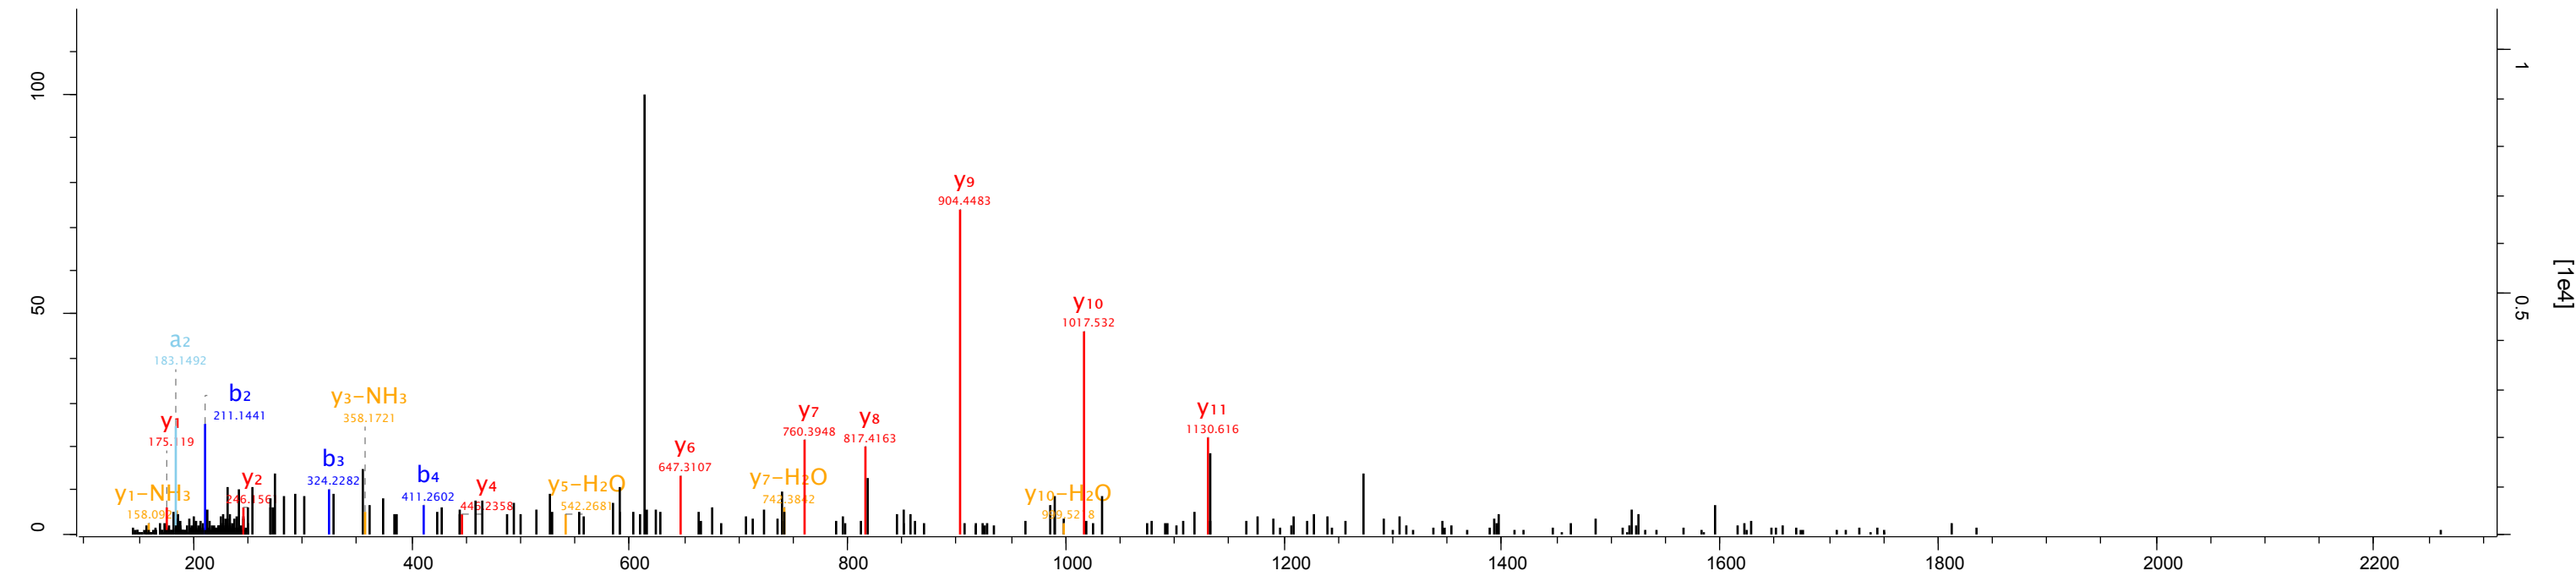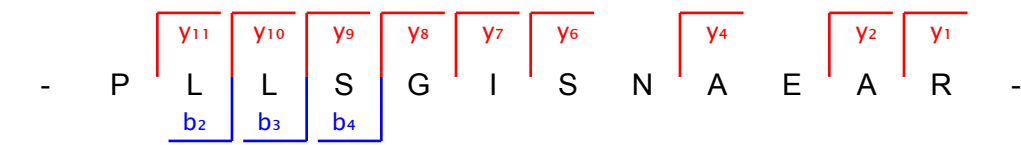



Raw file: 20150307\_NSC1\_Top\_opt\_F1\_01\_1685  
 Scan: 35978 Method: TOF; CID Score: 52.9 m/z: 846.4 Gene names: Pja2

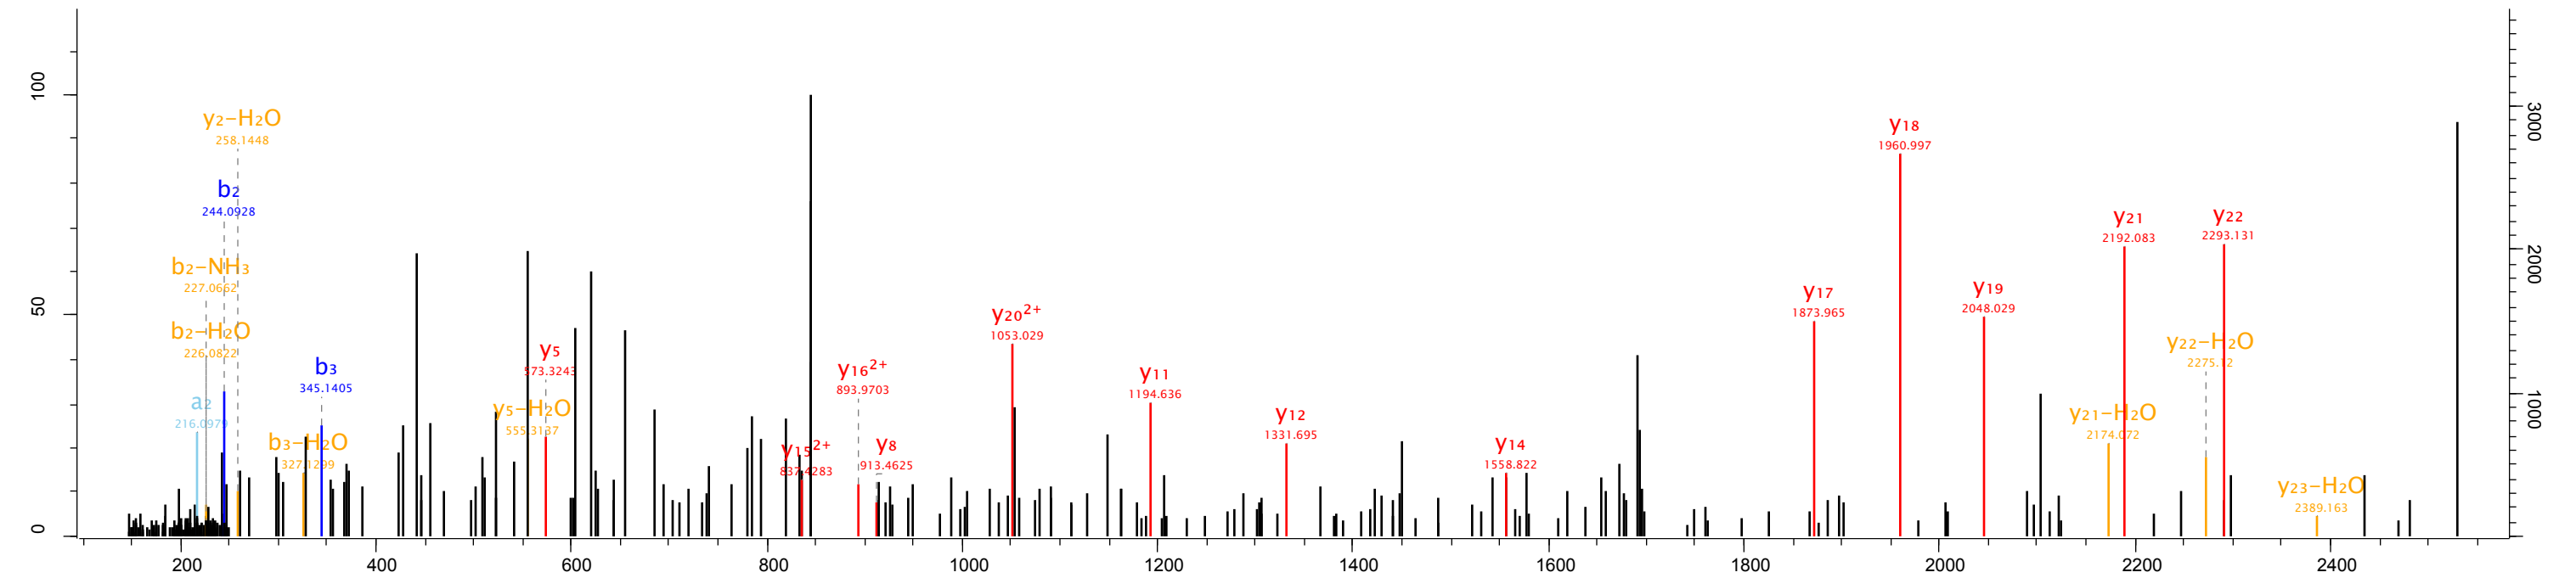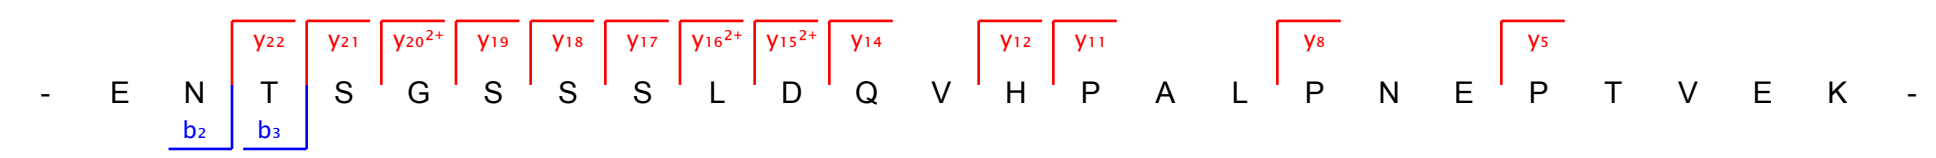

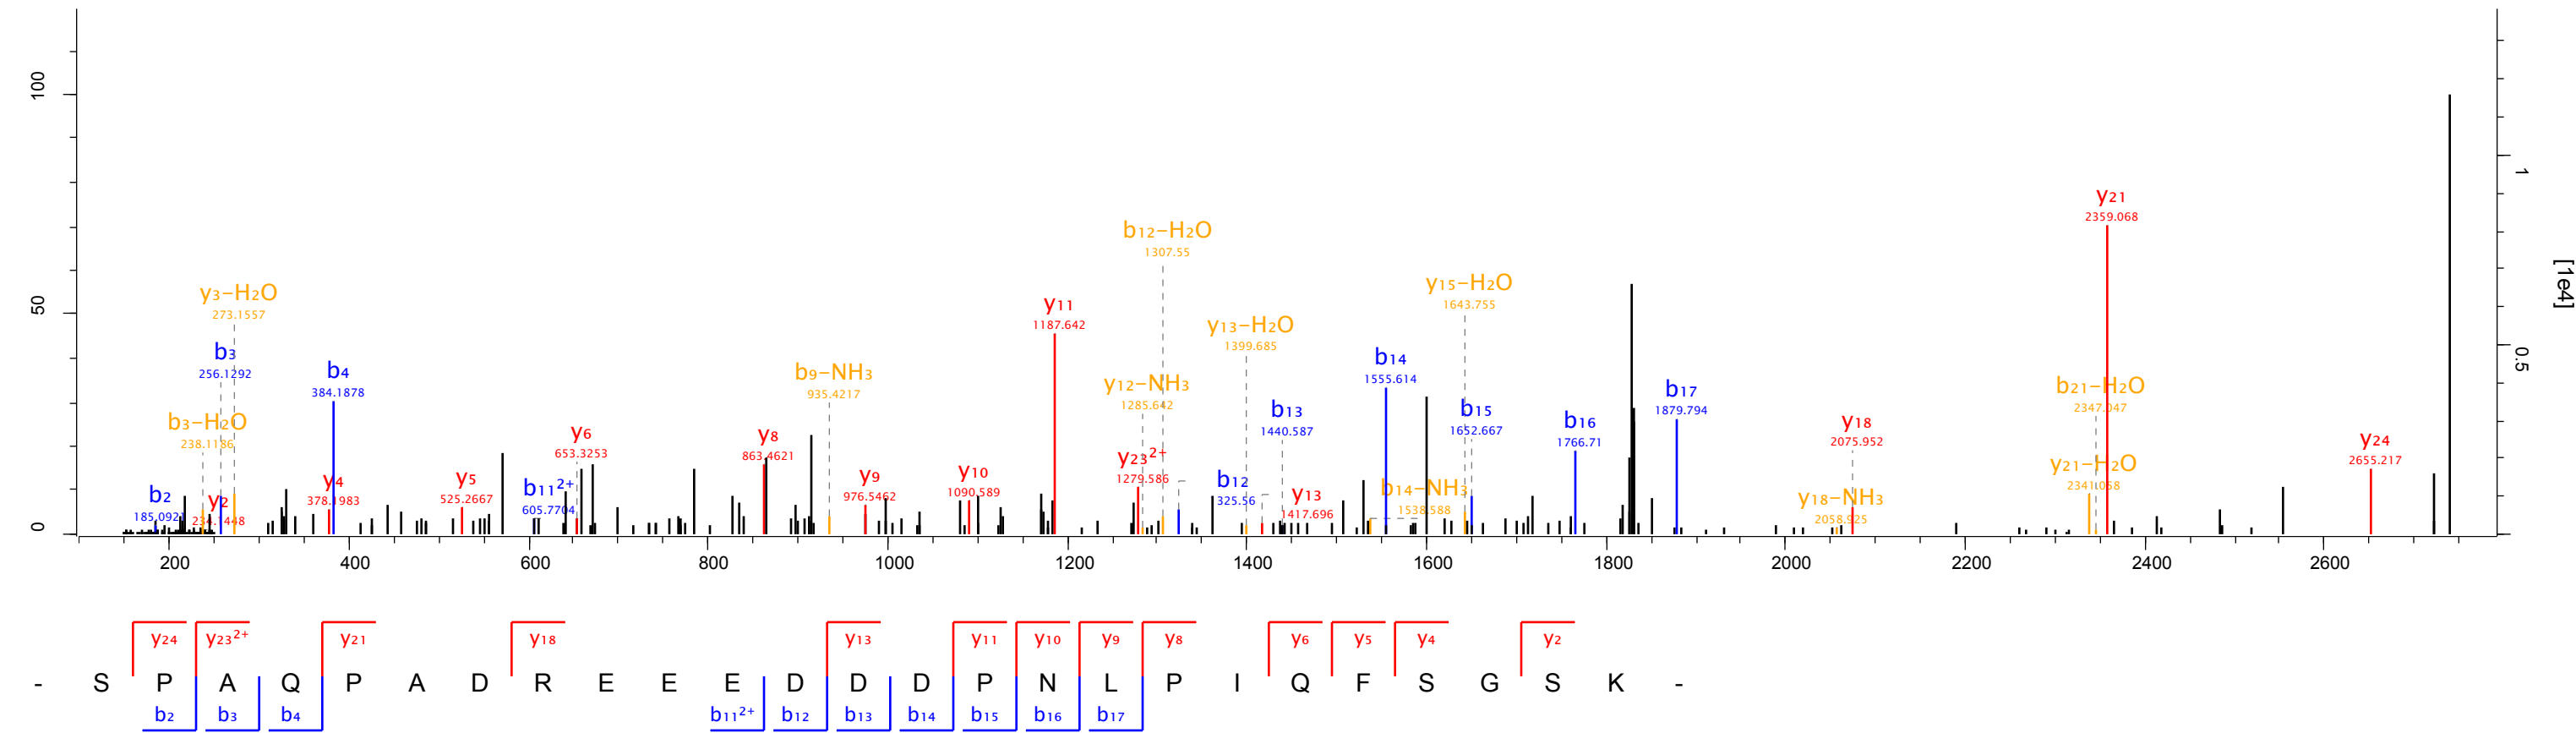

Raw file 20150307\_NSC1\_Top\_opt\_F1\_01\_1685 Scan 41578 Method TOF; CID Score 71.03 m/z 458.56 Gene names Mrpl51

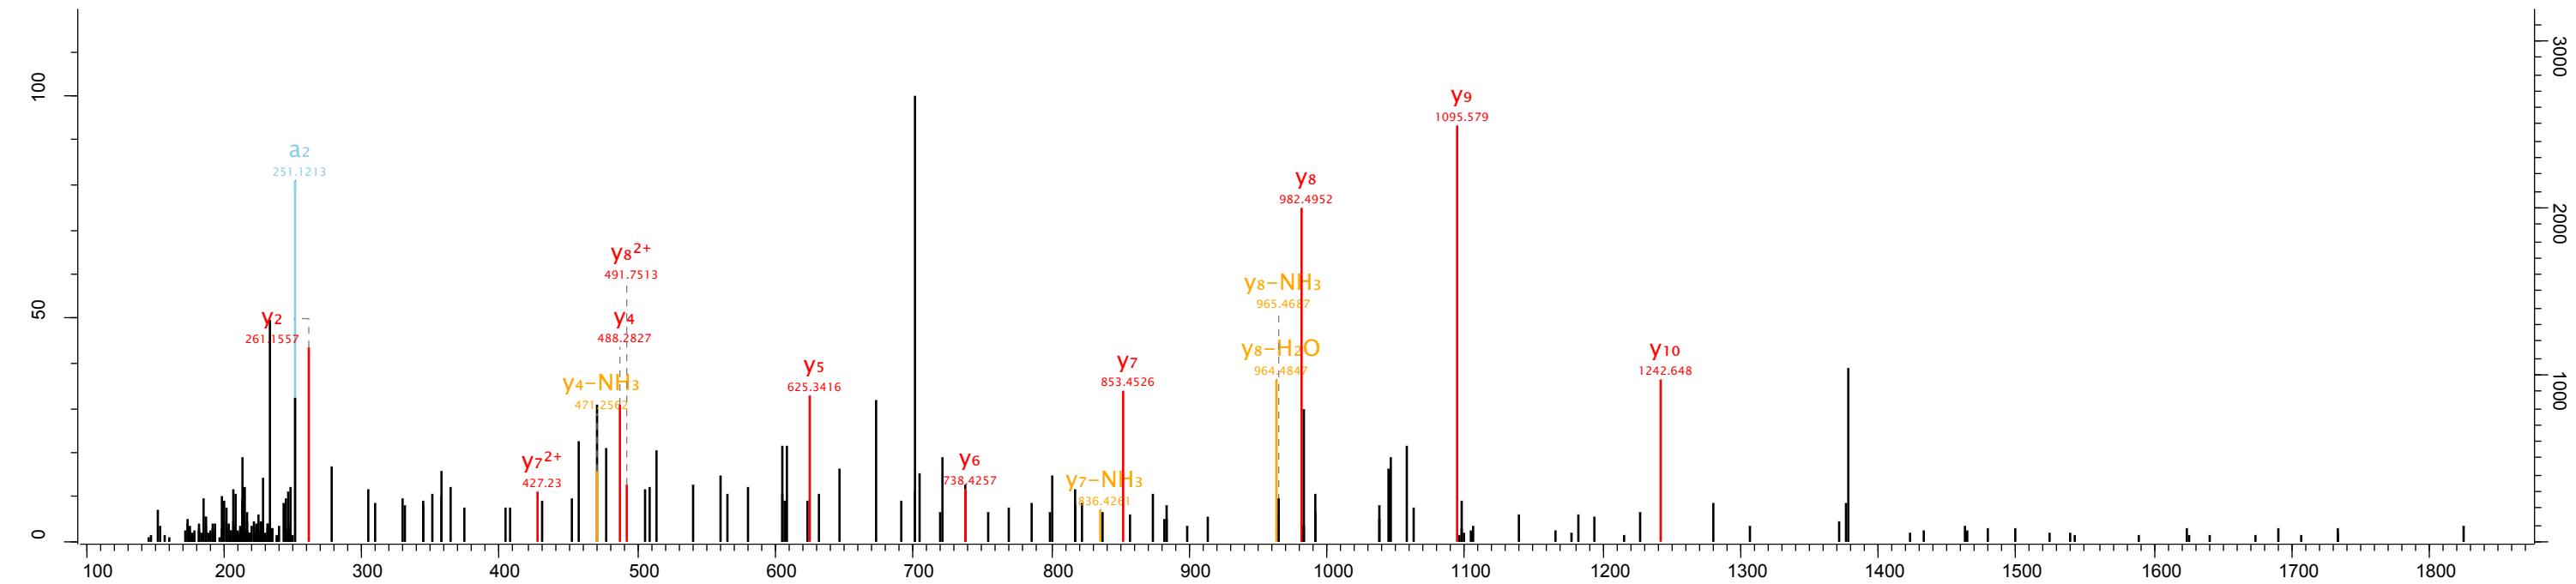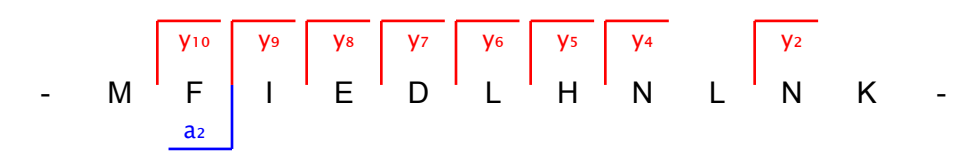

Raw file 20150307\_NSC1\_Top\_opt\_F1\_01\_1685 Scan 42510 Method TOF; CID Score 61.34 m/z 559.29 Gene names Lamtor4

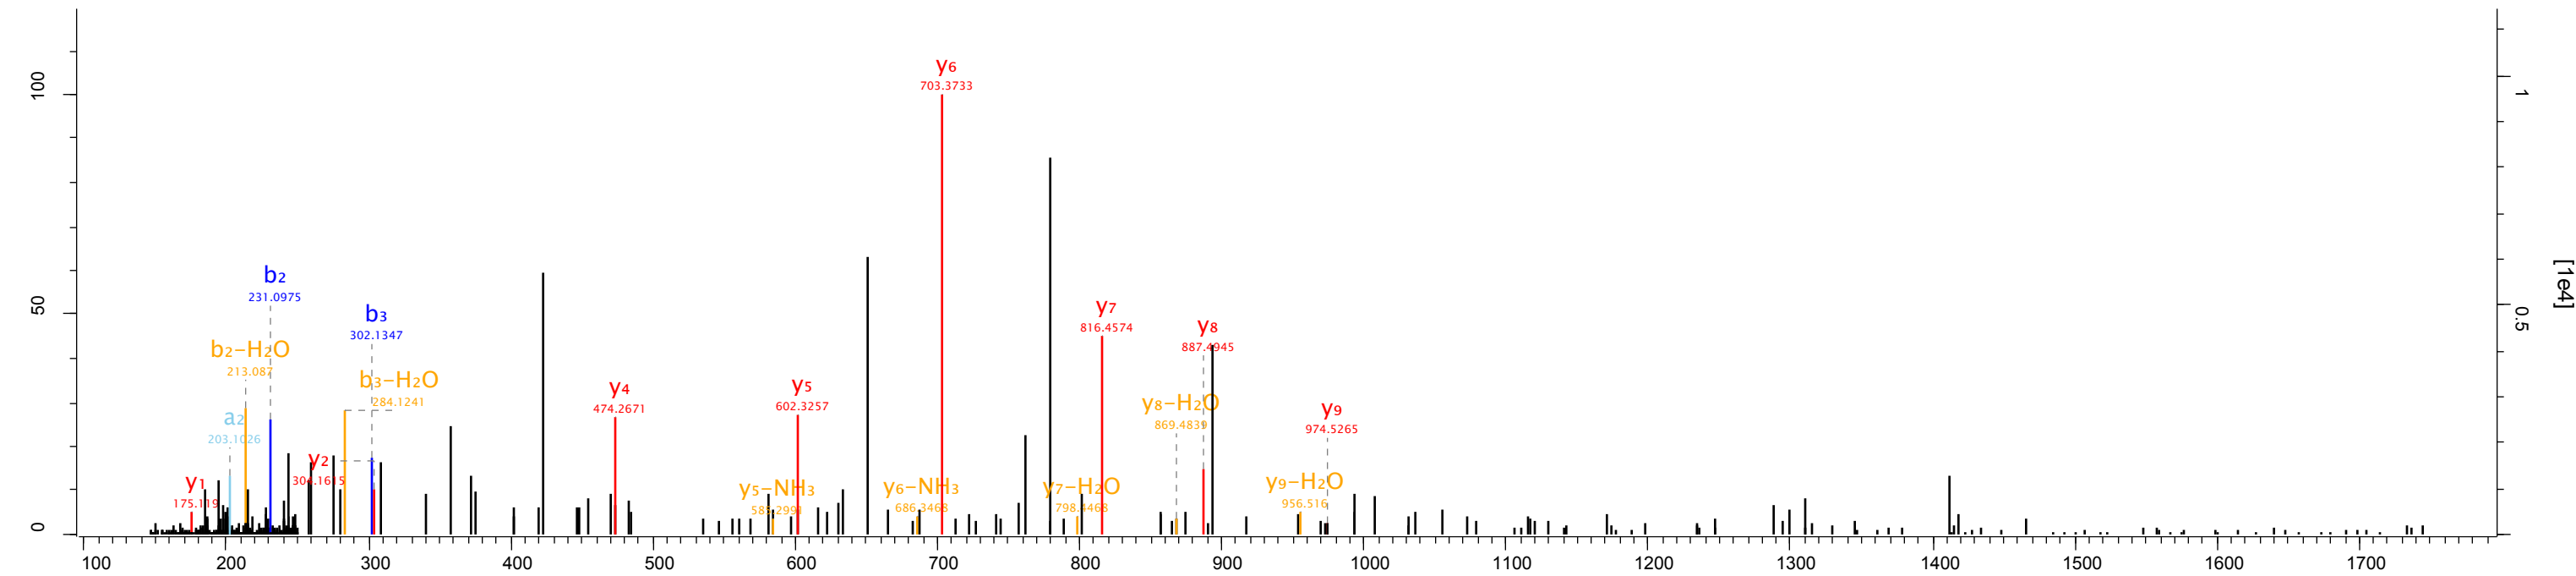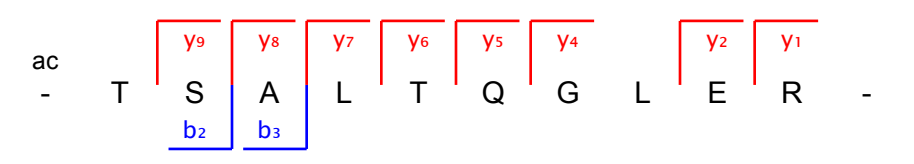

Raw file  
20150307\_NSC1\_Top\_opt\_F1\_01\_1685

Scan 44871 Method TOF; CID Score 54.56 m/z 771.07 Gene names Aagab

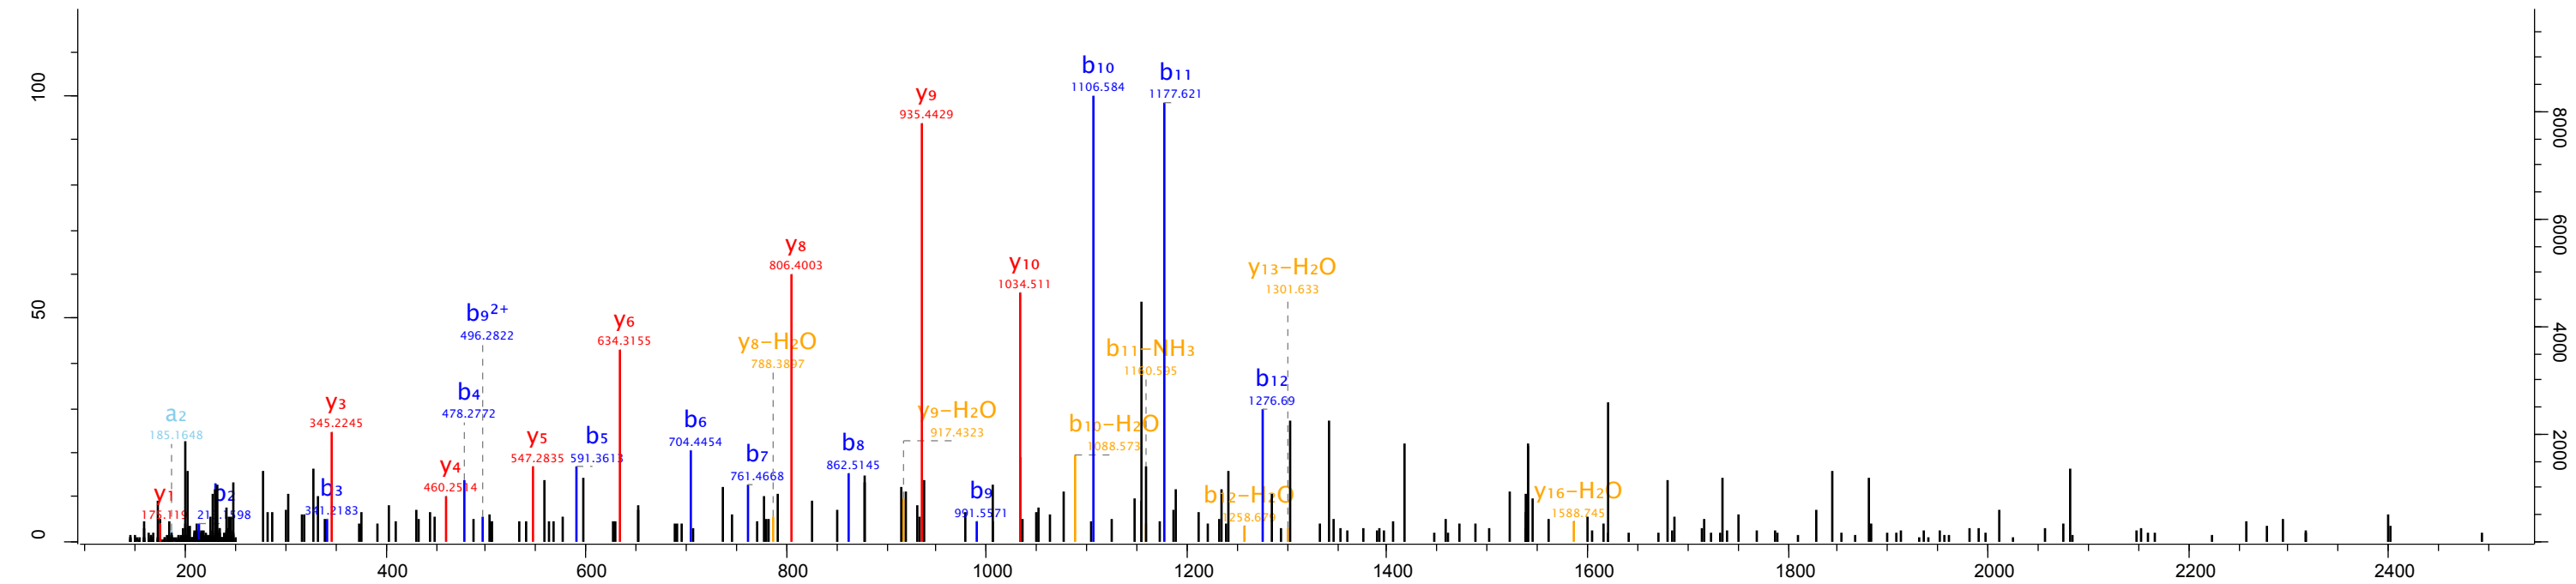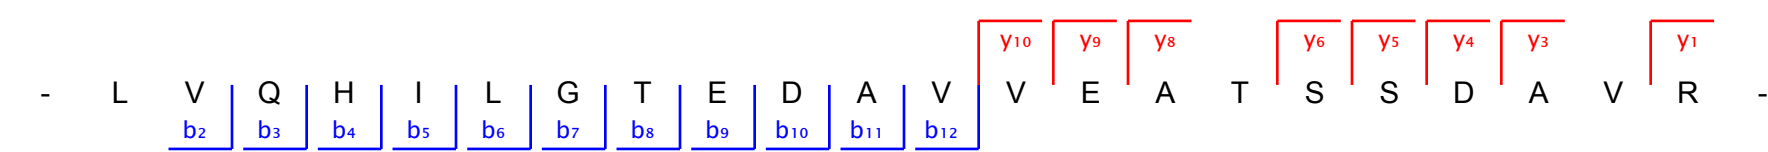

Raw file 20150307\_NSC1\_Top\_opt\_F1\_01\_1685 Scan 49980 Method TOF; CID Score 55.2 m/z 689.36 Gene names Tarbp2

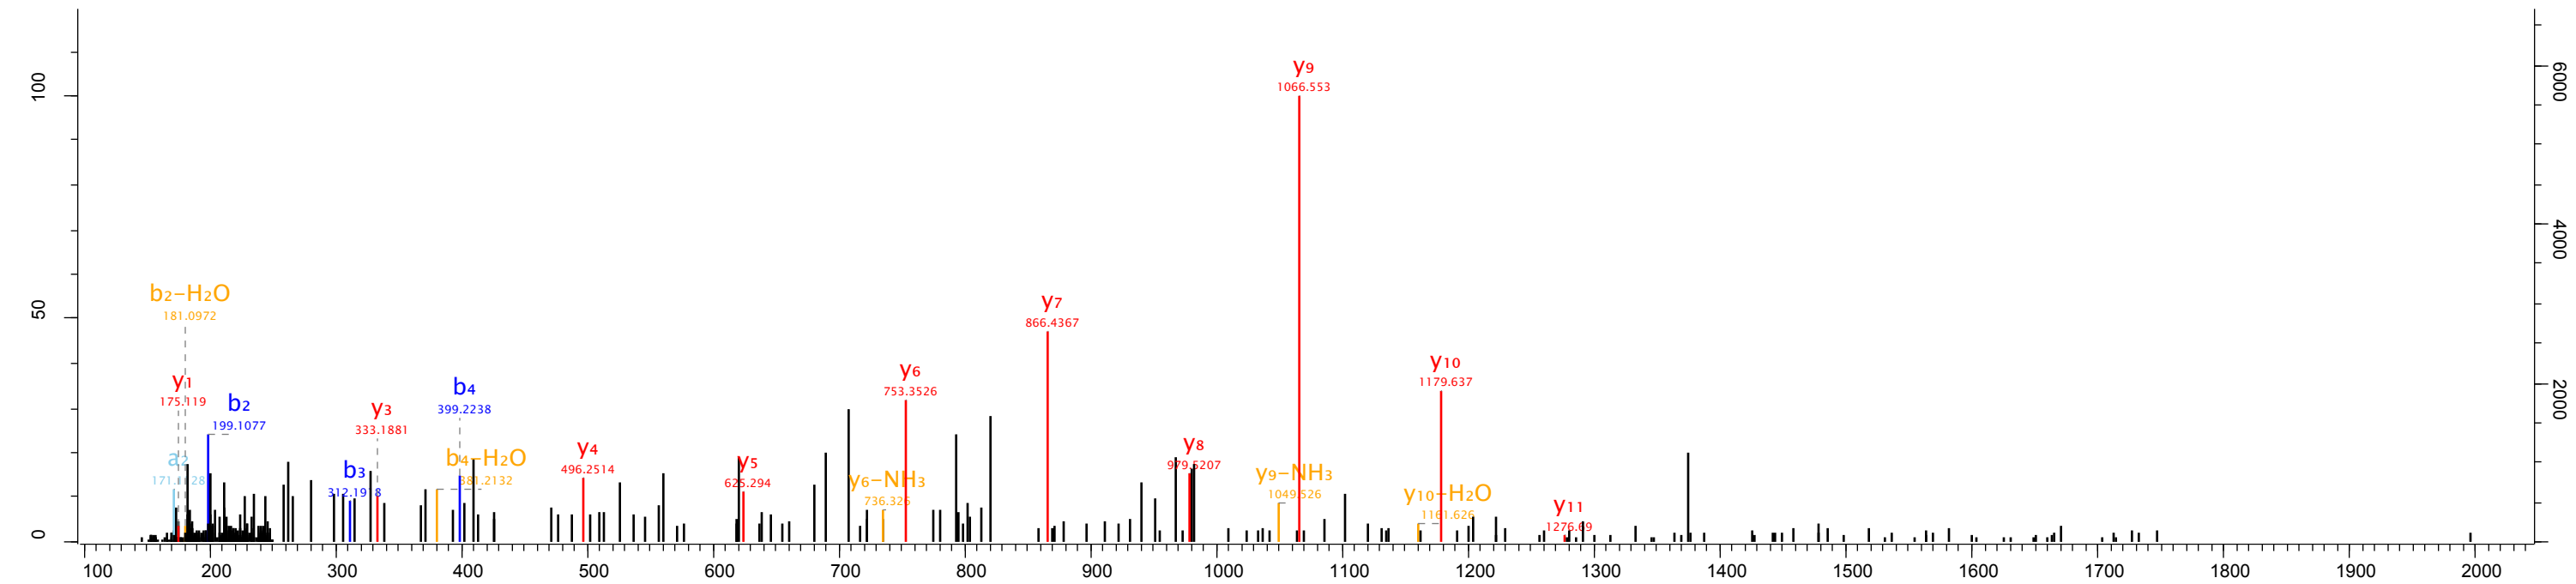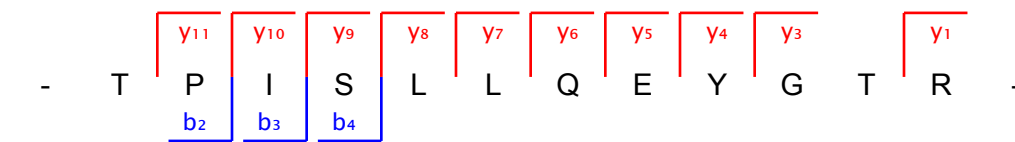

Raw file 20150307\_NSC1\_Top\_opt\_F1\_01\_1685 Scan 52937 Method TOF; CID Score 54.09 m/z 836.4 Gene names Tfb2m;Gm1818

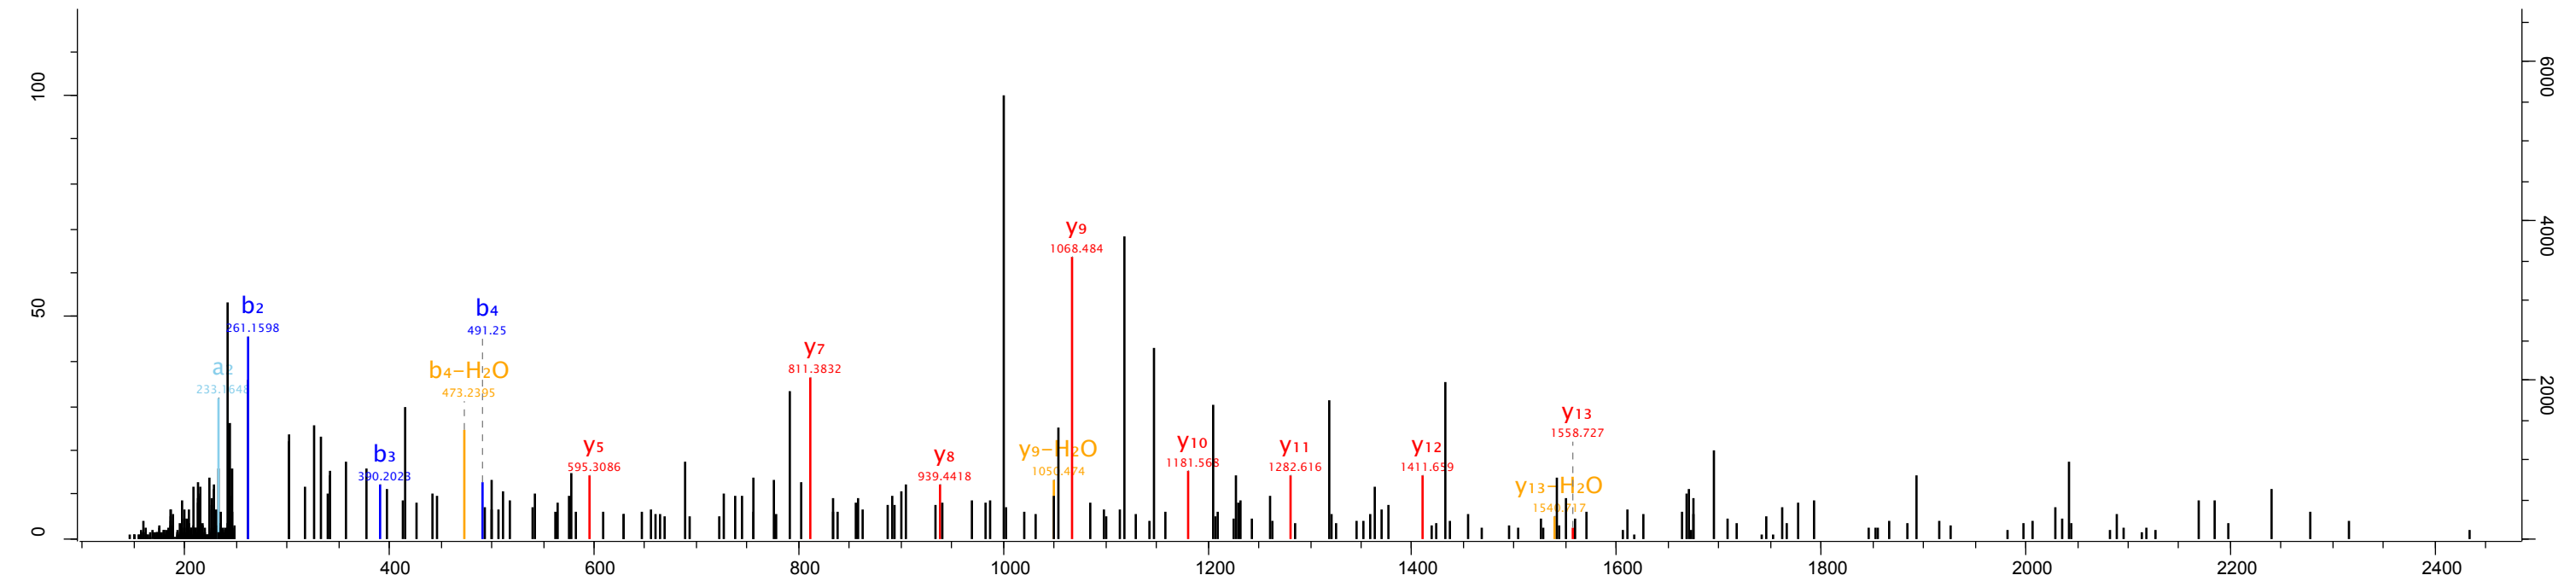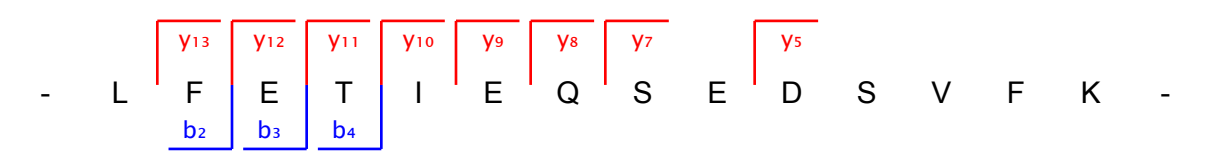

Raw file: 20150307\_NSC1\_Top\_opt\_F1\_01\_1685  
 Scan: 53359 Method: TOF; CID Score: 83.2 m/z: 705.39 Gene names: Rundc3a

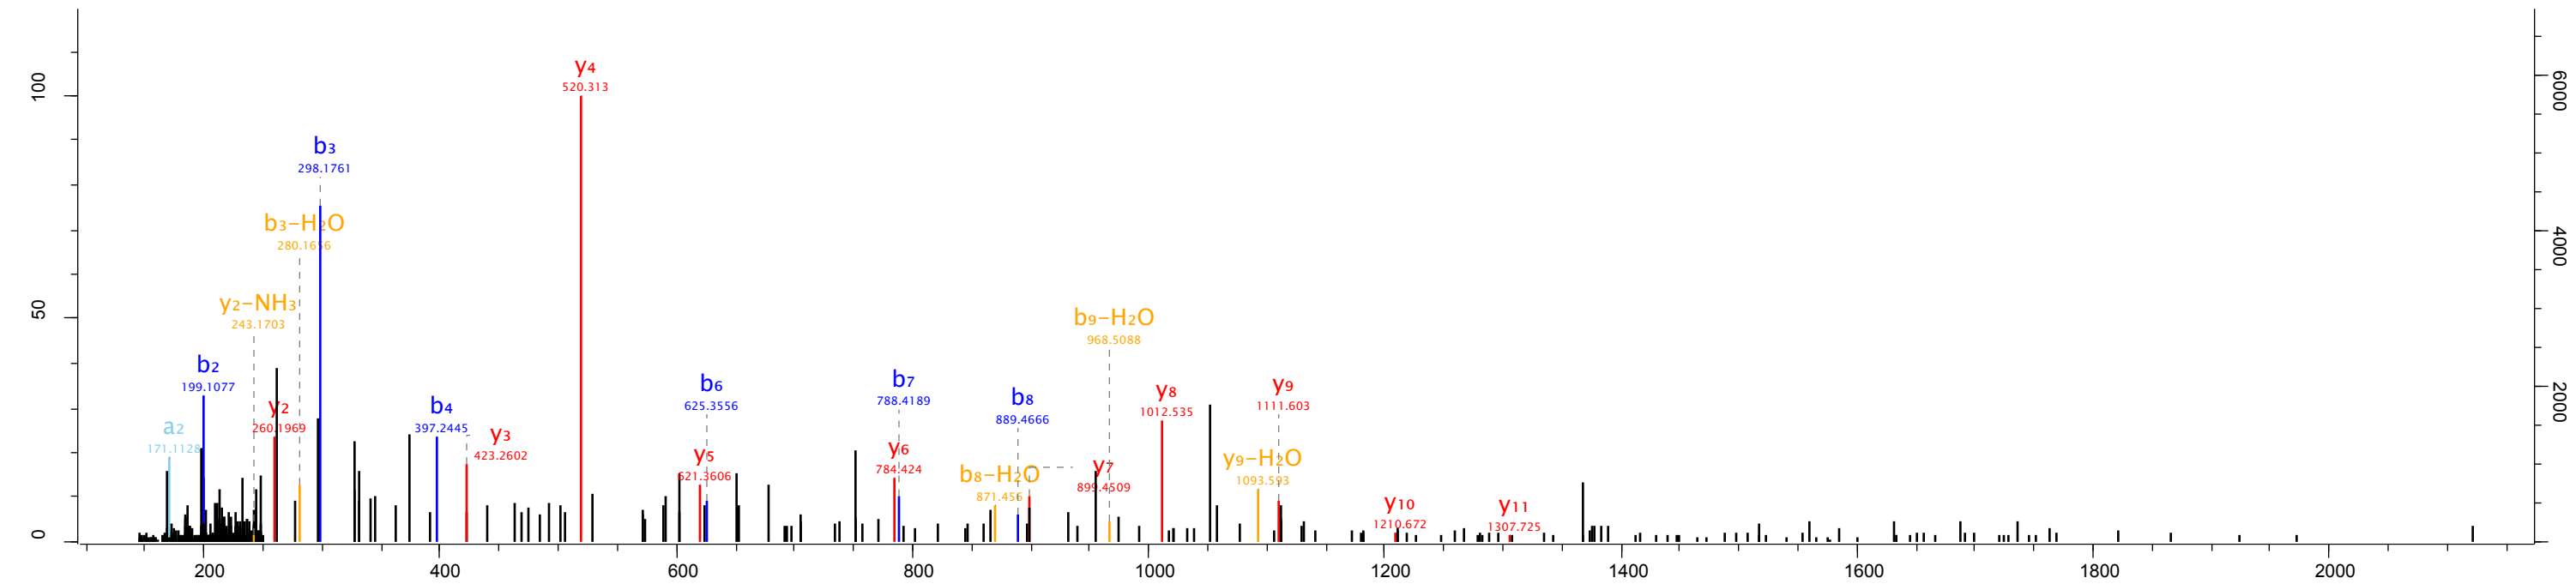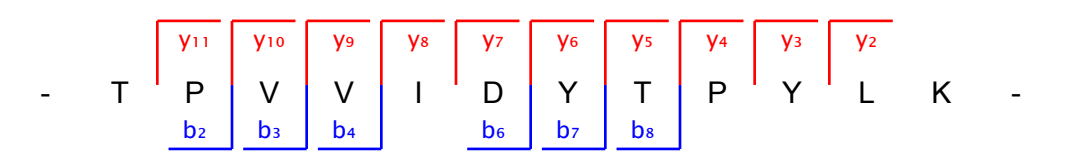



Raw file 20150307\_NSC1\_Top\_opt\_F1\_01\_1685 Scan 56442 Method TOF; CID Score 64.45 m/z 918.47 Gene names Pex10

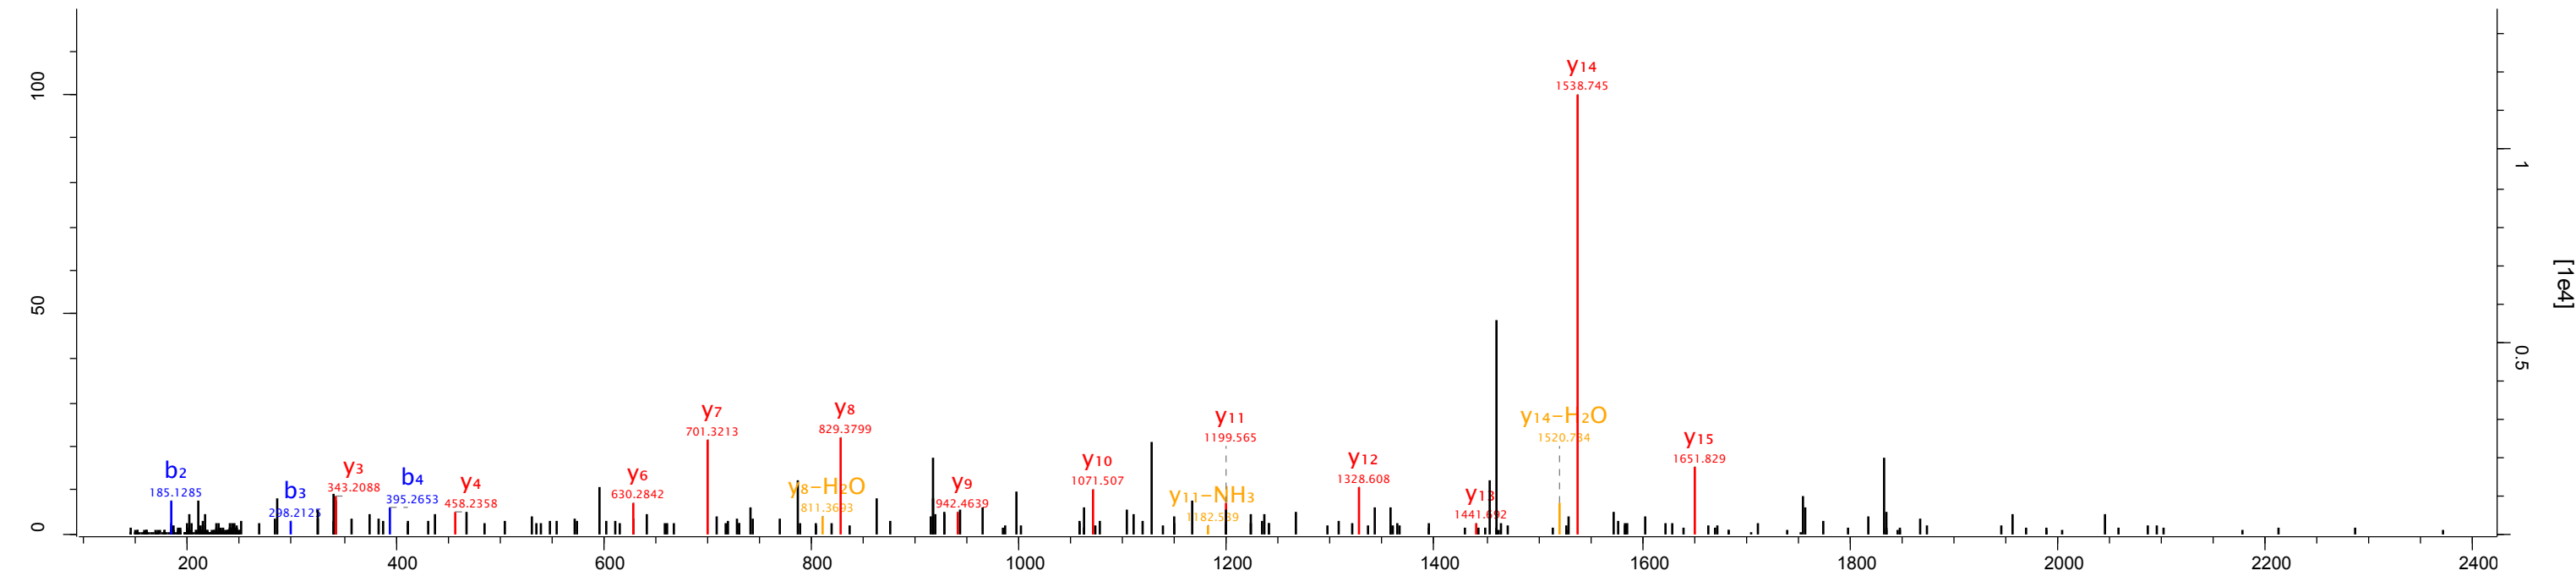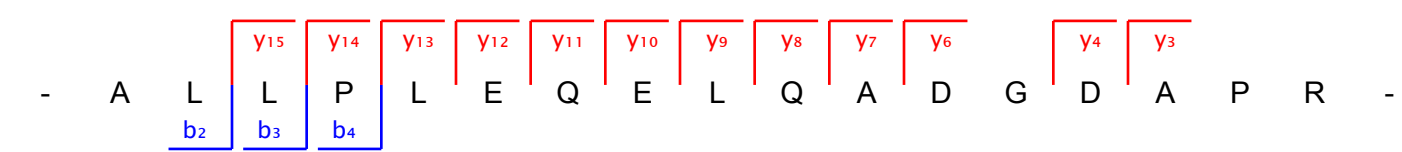

Raw file  
20150307\_NSC1\_Top\_opt\_F1\_01\_1685

Scan 57125 Method TOF; CID Score 112.26 m/z 967.74 Gene names Tmem208

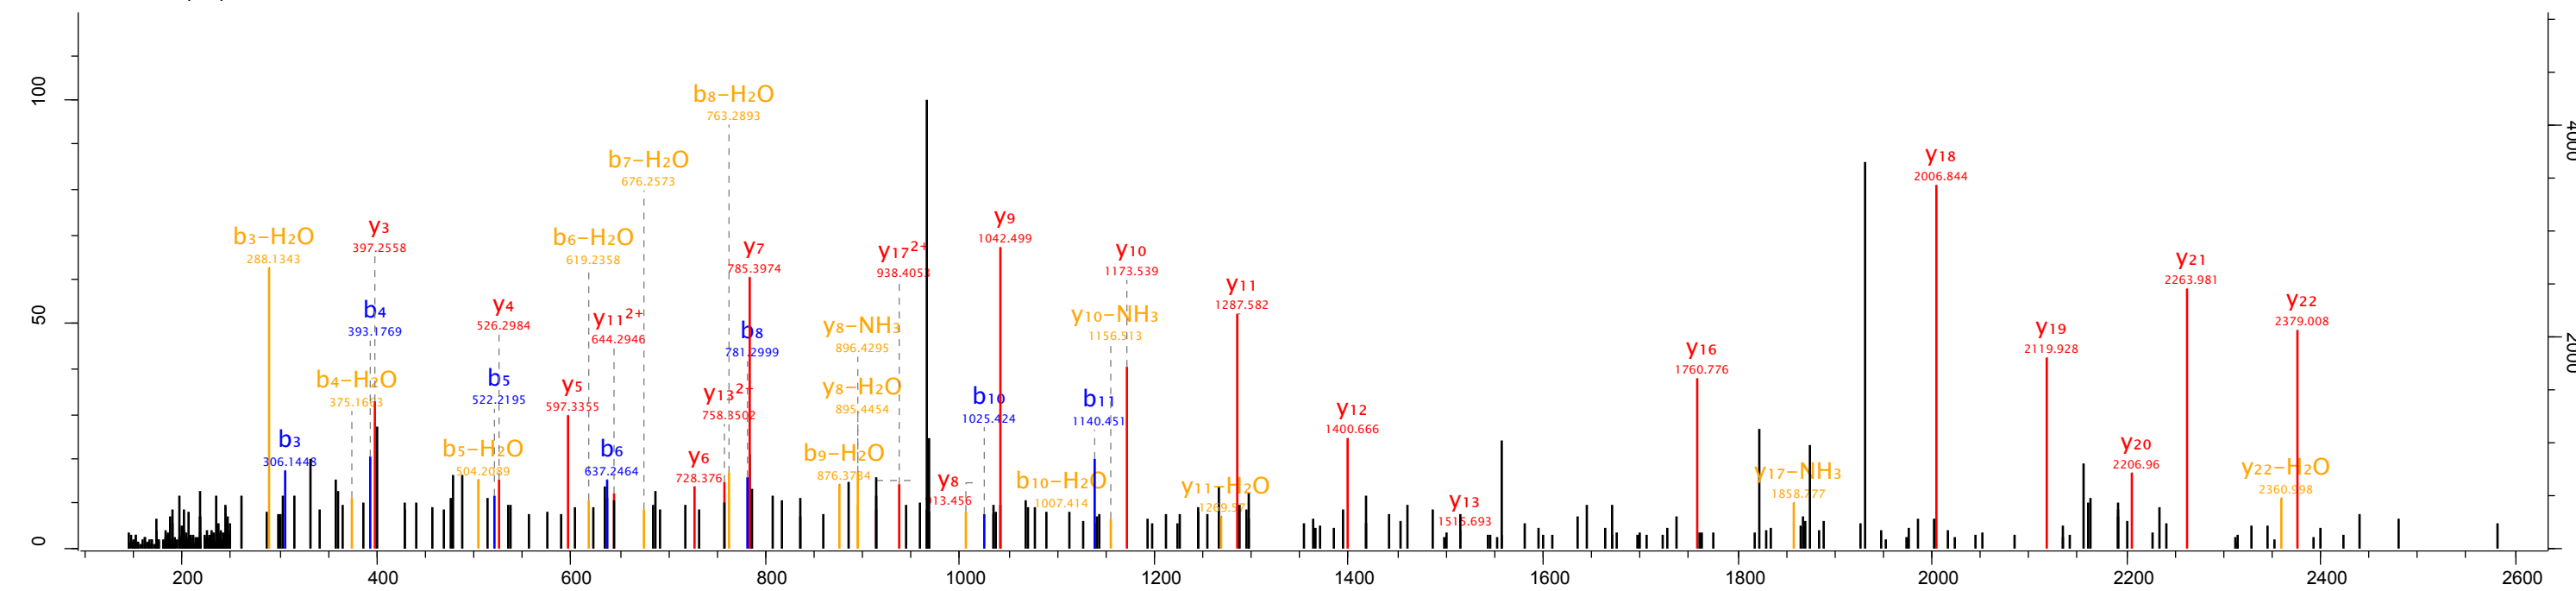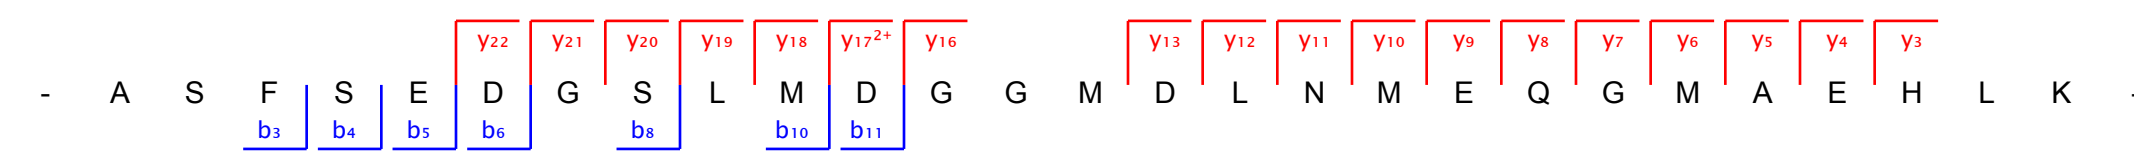

Raw file 20150307\_NSC1\_Top\_opt\_F1\_01\_1685 Scan 58294 Method TOF; CID Score 57.48 m/z 1163.53 Gene names Zfyve27

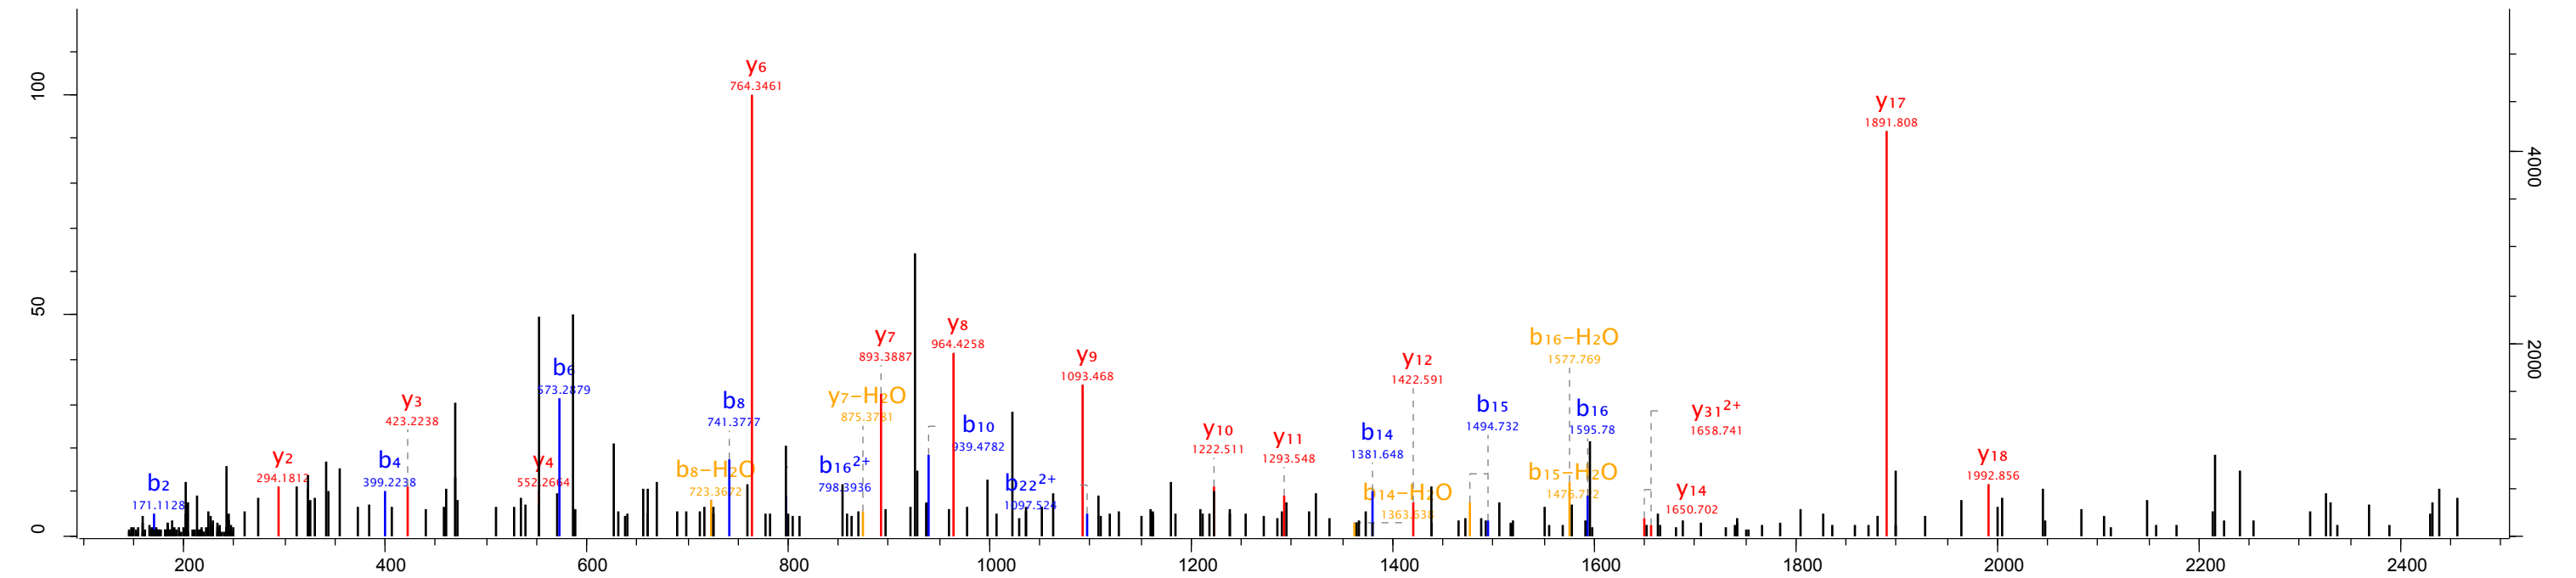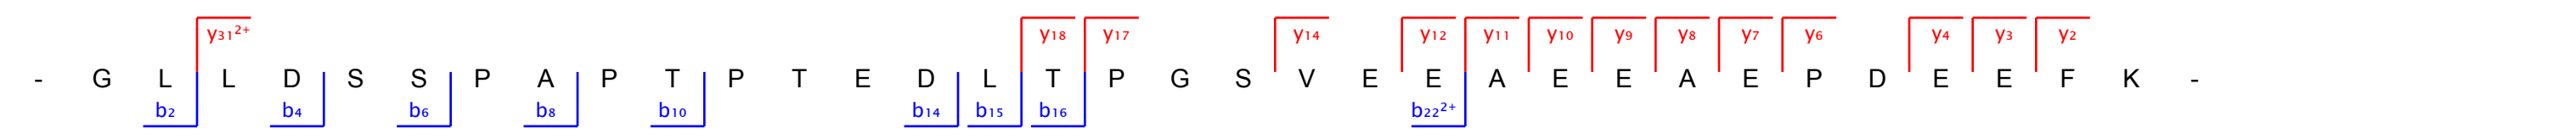

Raw file 20150307\_NSC1\_Top\_opt\_F1\_01\_1685 Scan 58332 Method TOF; CID Score 113.47 m/z 913.44 Gene names Isca1;AK157302

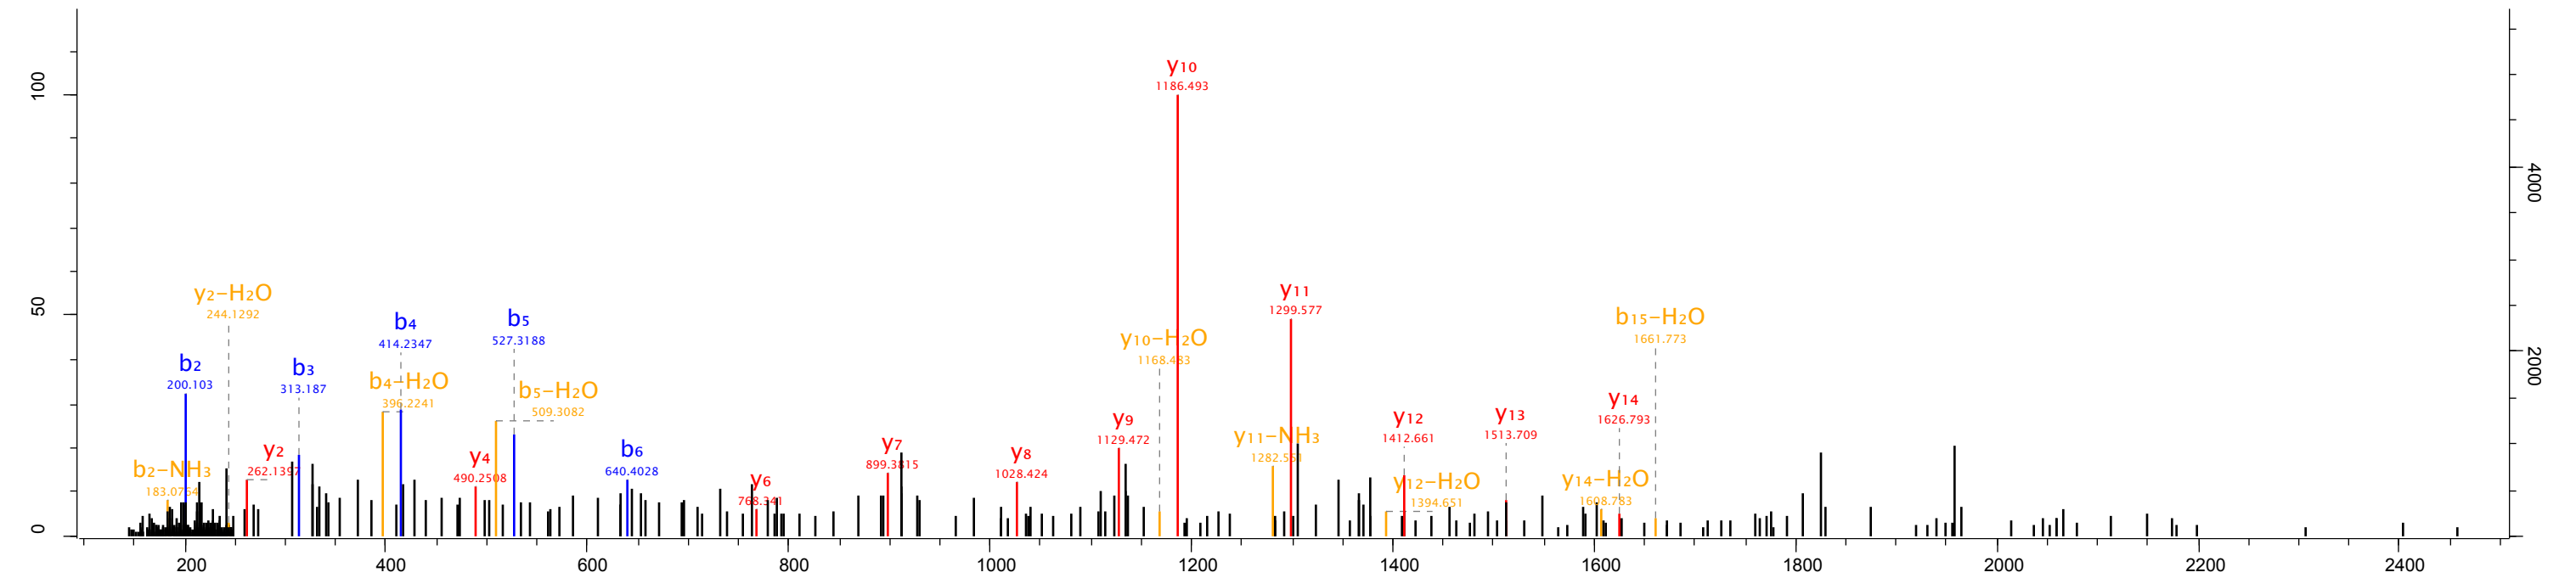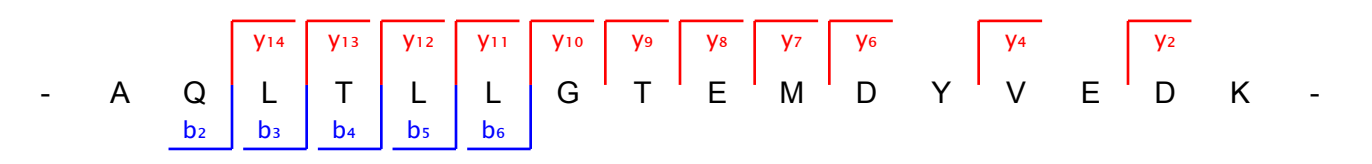

Raw file  
20150307\_NSC1\_Top\_opt\_F1\_01\_1685

Scan 61453 Method TOF; CID Score 120.86 m/z 714.89 Gene names Ostc

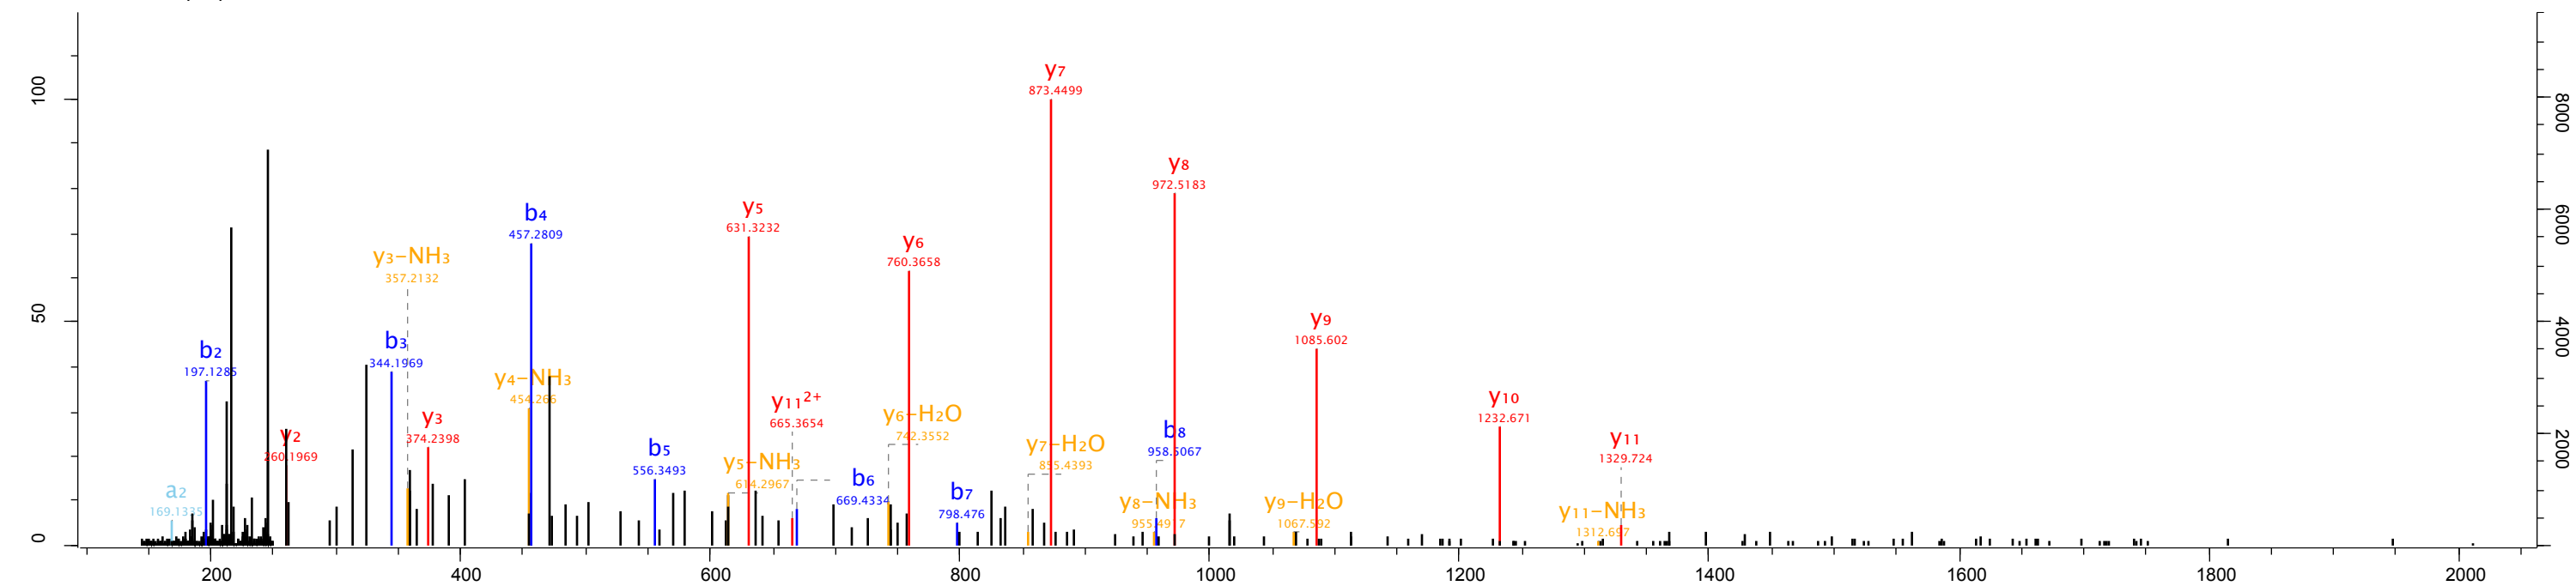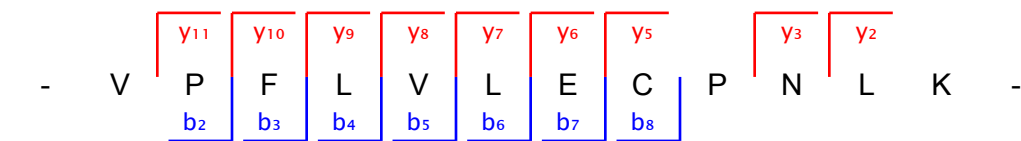

Raw file 20150307\_NSC1\_Top\_opt\_F1\_01\_1685 Scan 61809 Method TOF; CID Score 62.29 m/z 783.41

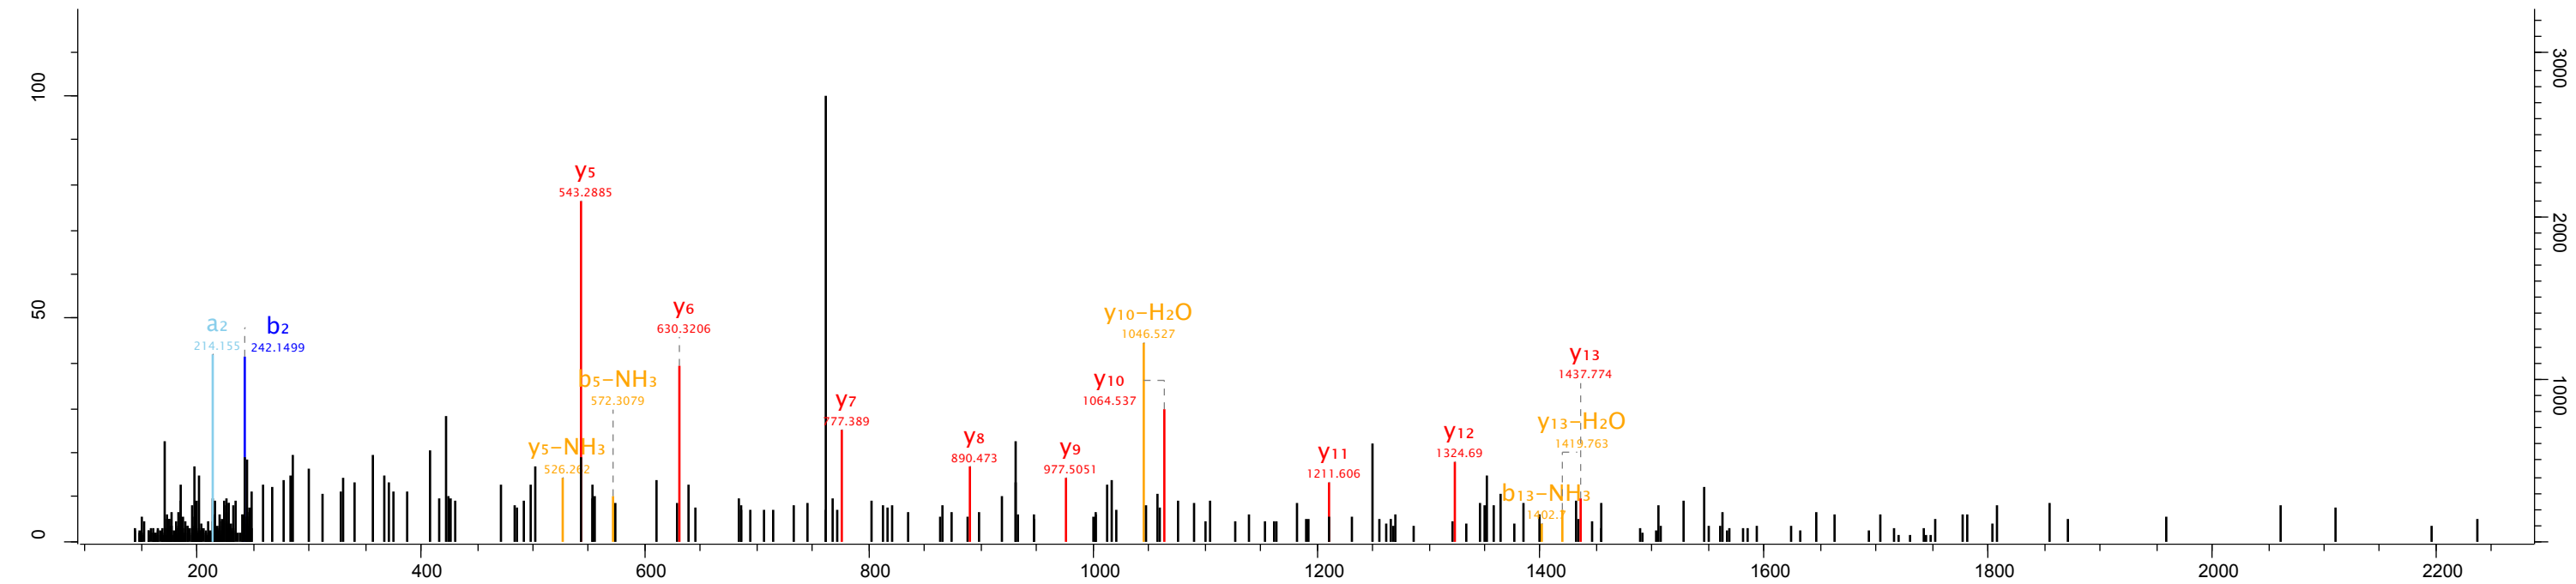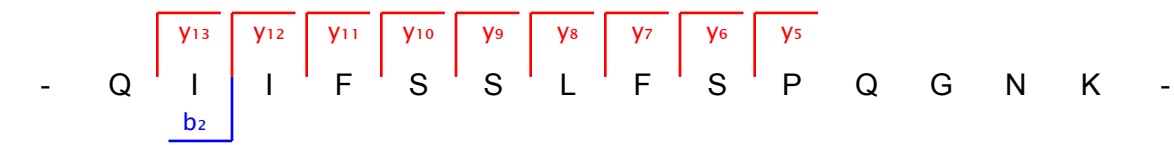

Raw file 20150307\_NSC1\_Top\_opt\_F1\_01\_1685 Scan 63012 Method TOF; CID Score 61.19 m/z 895.45 Gene names Taf5

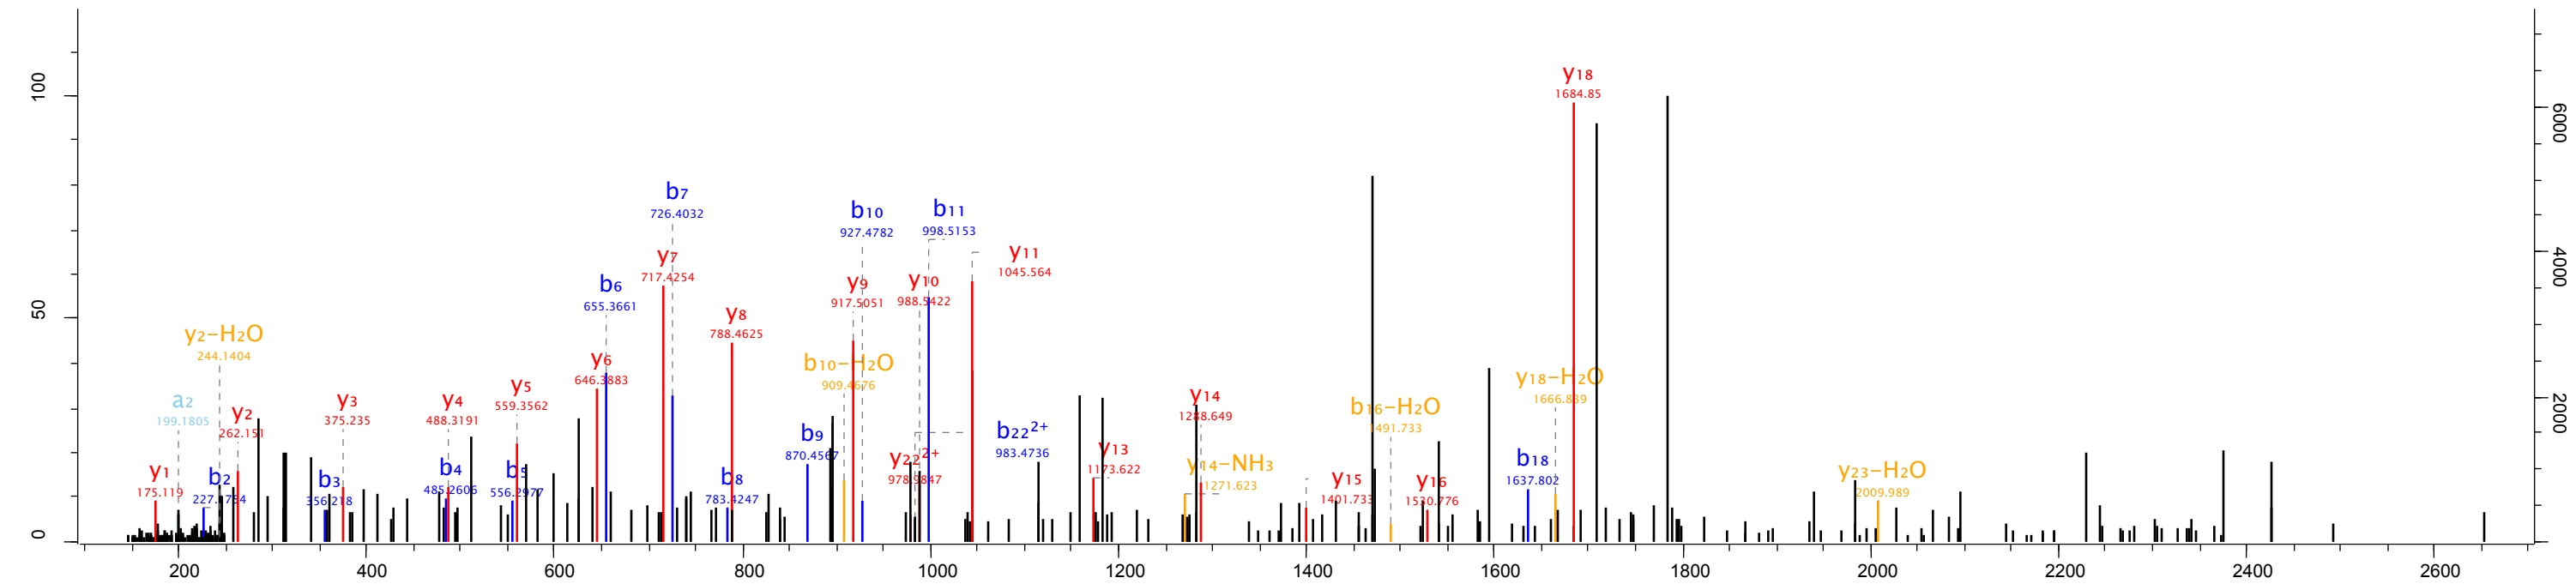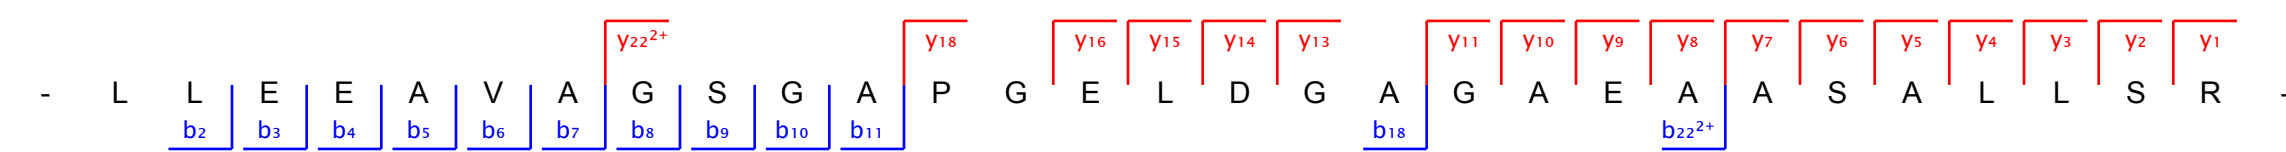

Raw file  
20150307\_NSC1\_Top\_opt\_F1\_01\_1685

Scan 69185 Method TOF; CID Score 63.7 m/z 971.12 Gene names Snrpe

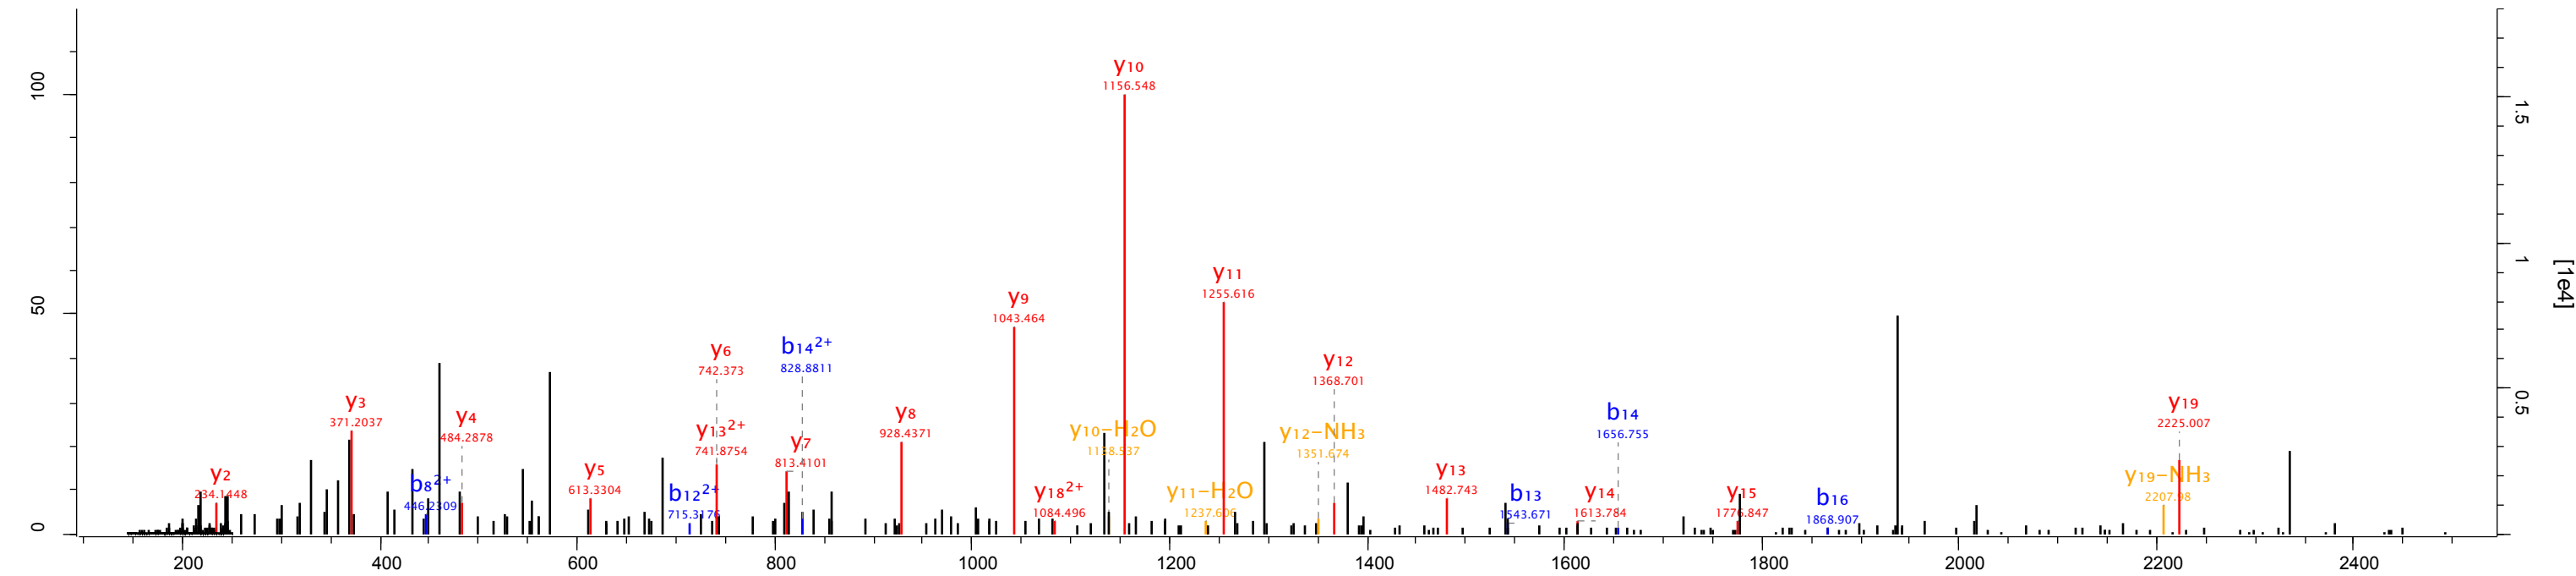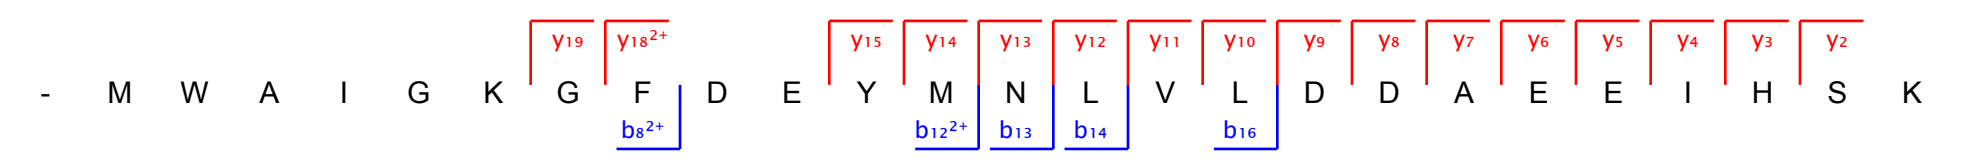



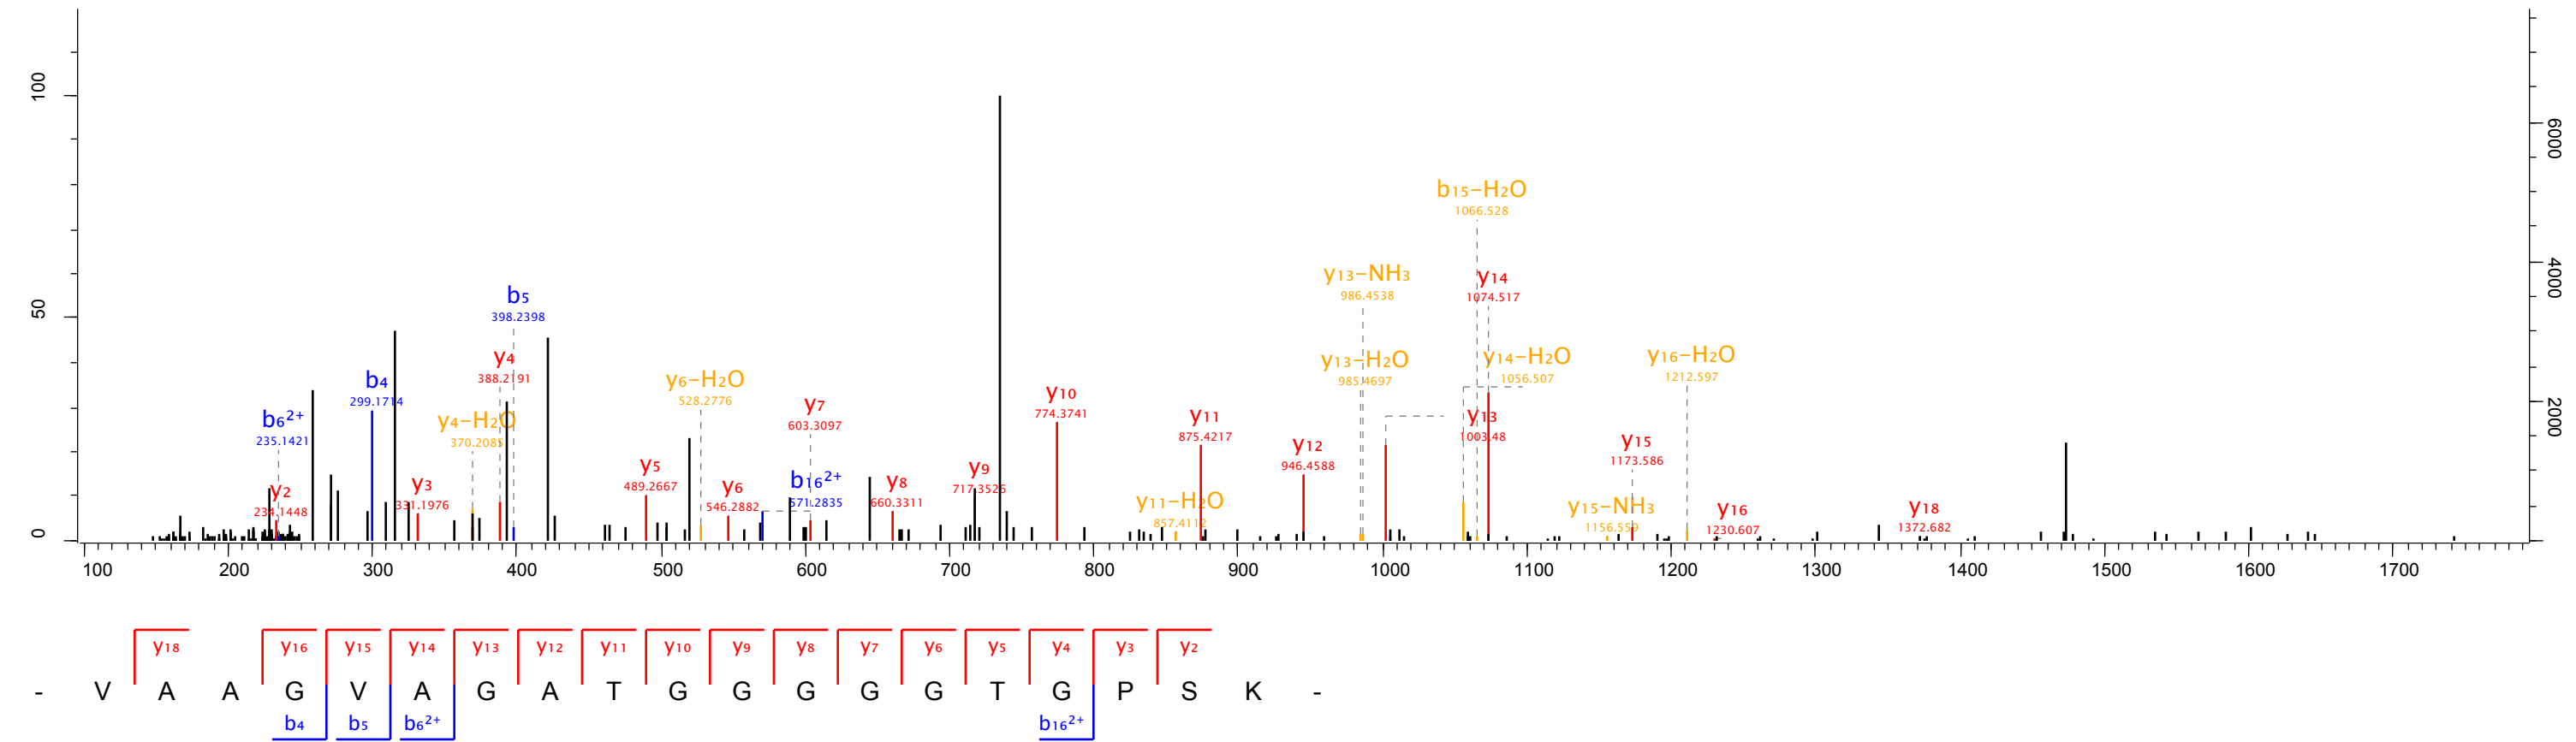

Raw file  
20150307\_NSC2\_Top\_opt\_F2\_01\_1688

Scan 20810  
Method TOF; CID  
Score 69.03  
m/z 660.82  
Gene names Prkg1

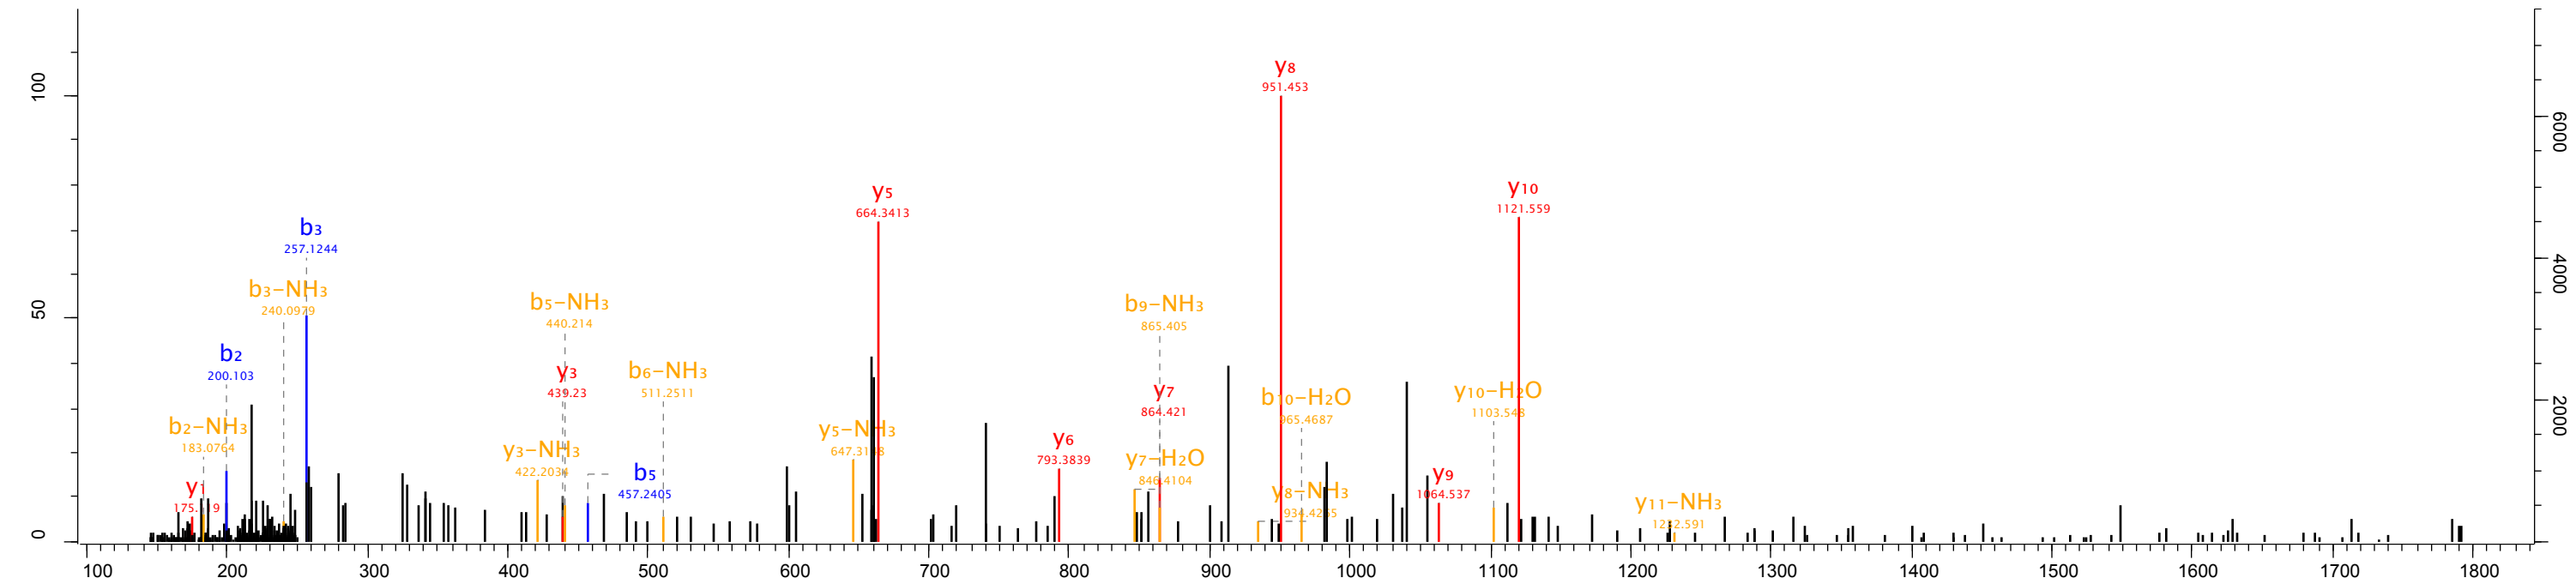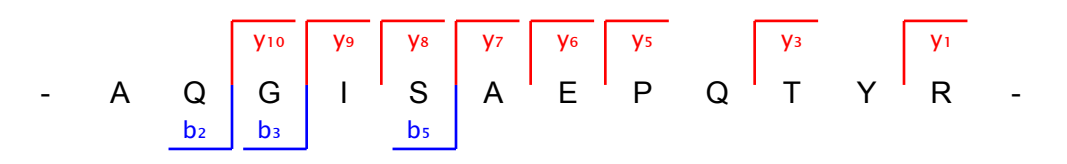

Raw file 20150307\_NSC2\_Top\_opt\_F2\_01\_1688 Scan 26007 Method TOF; CID Score 70.54 m/z 468.27 Gene names Znf423;Zfp423

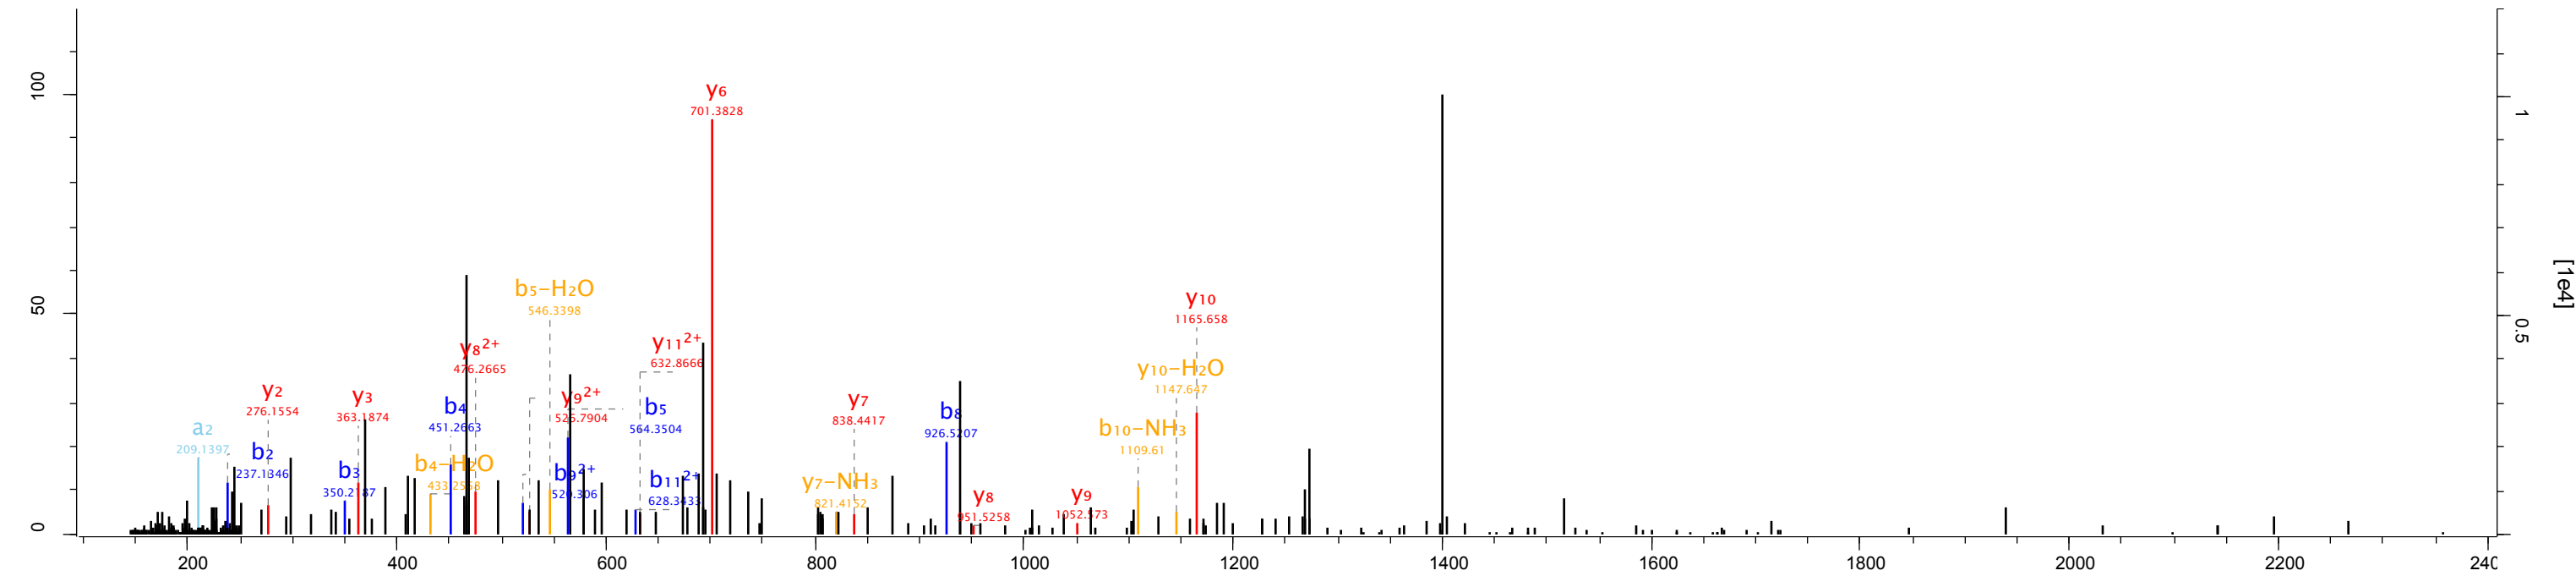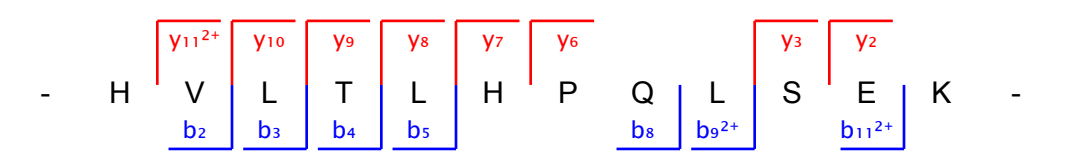

Raw file 20150307\_NSC2\_Top\_opt\_F2\_01\_1688 Scan 28982 Method TOF; CID Score 66.83 m/z 580.3 Gene names Slain2

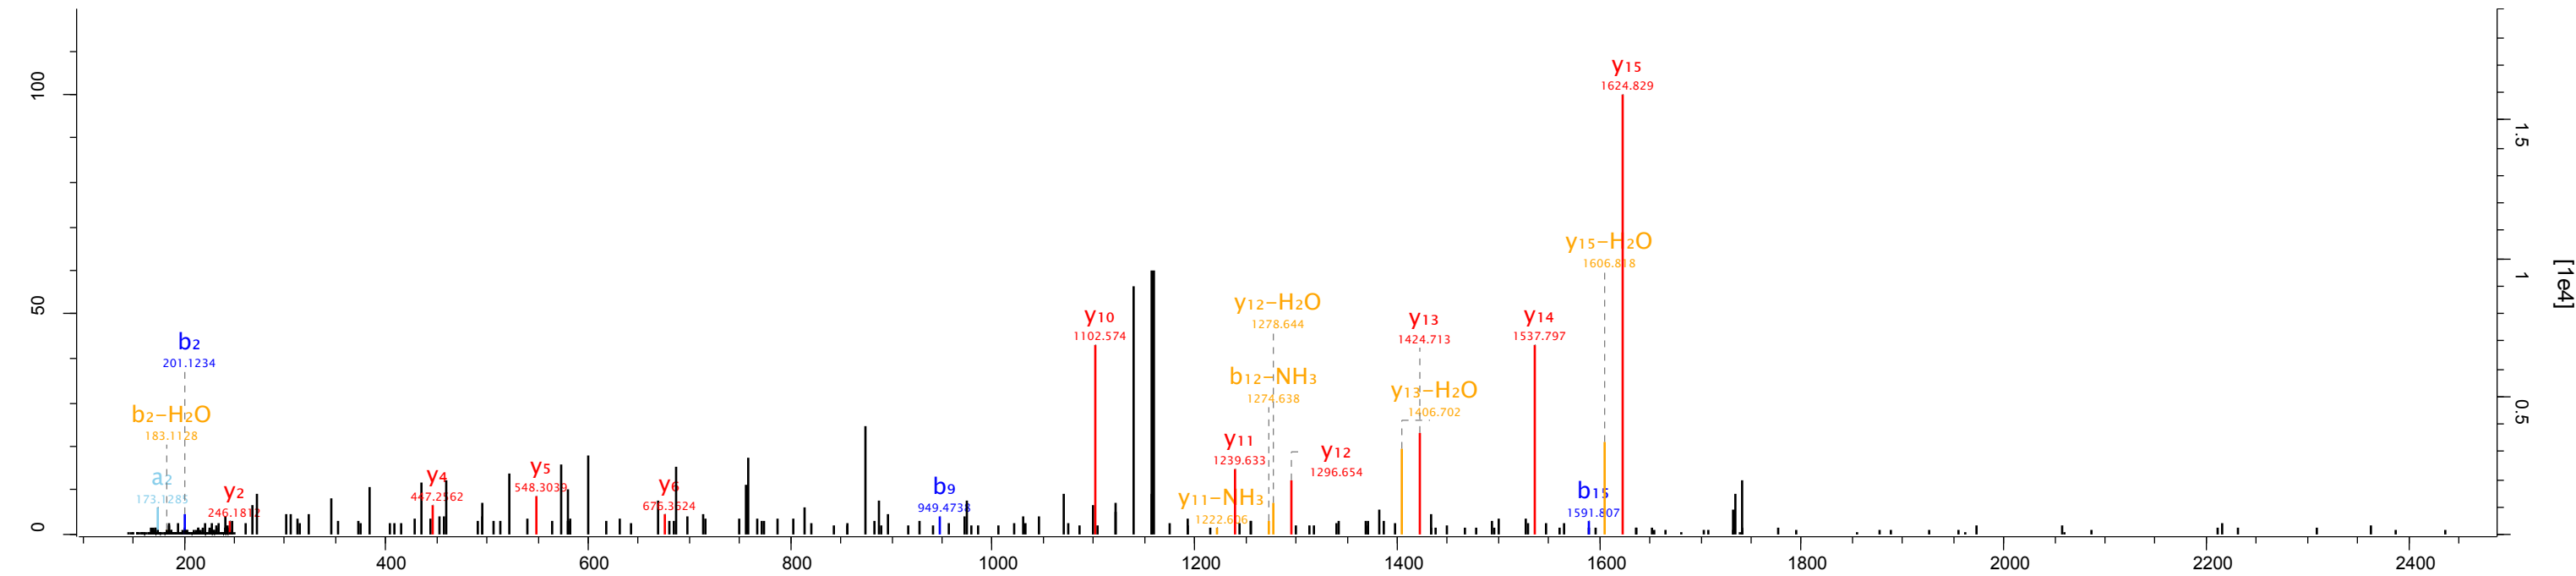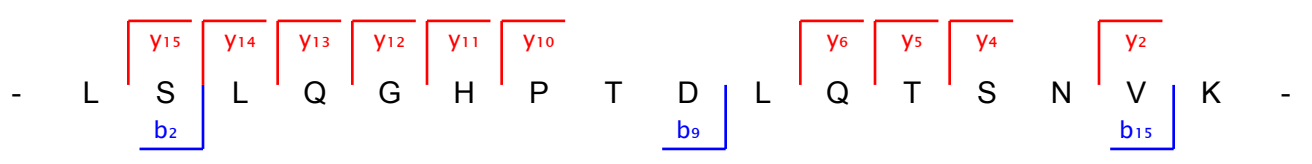

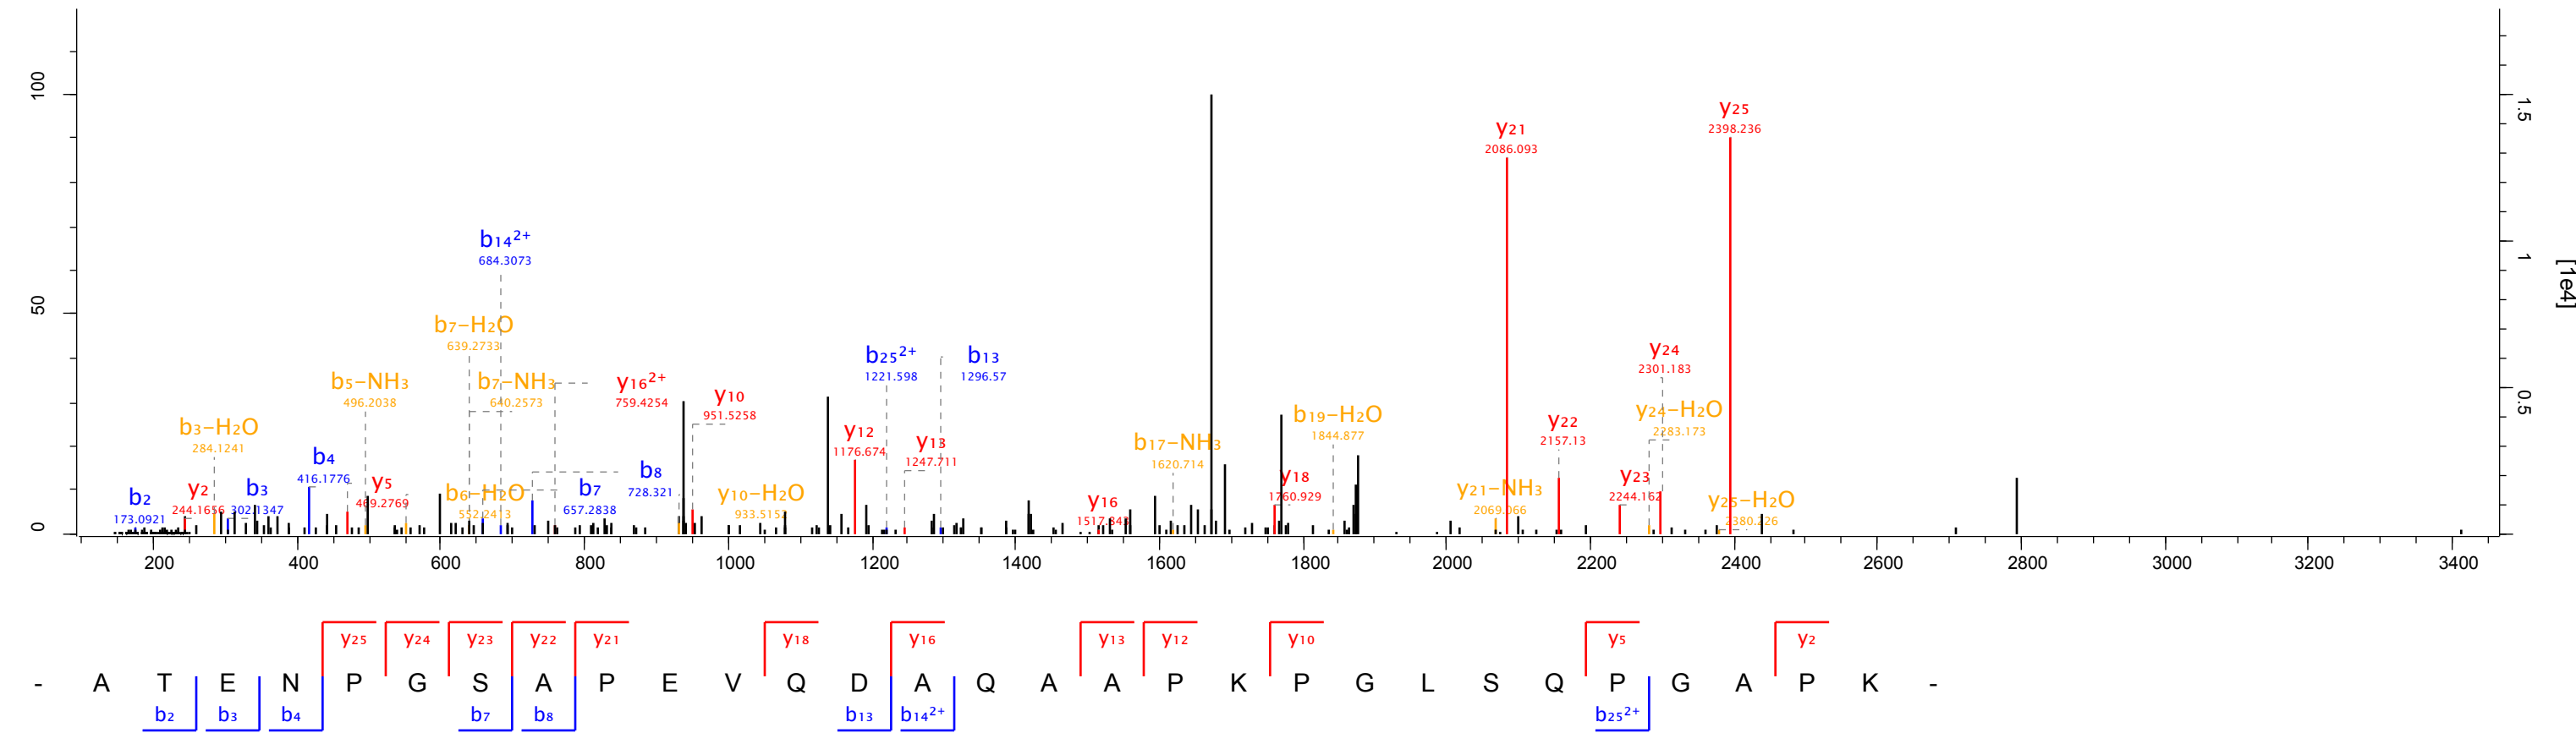

Raw file 20150307\_NSC2\_Top\_opt\_F2\_01\_1688 Scan 38331 Method TOF; CID Score 70.26 m/z 764.9 Gene names Hddc3

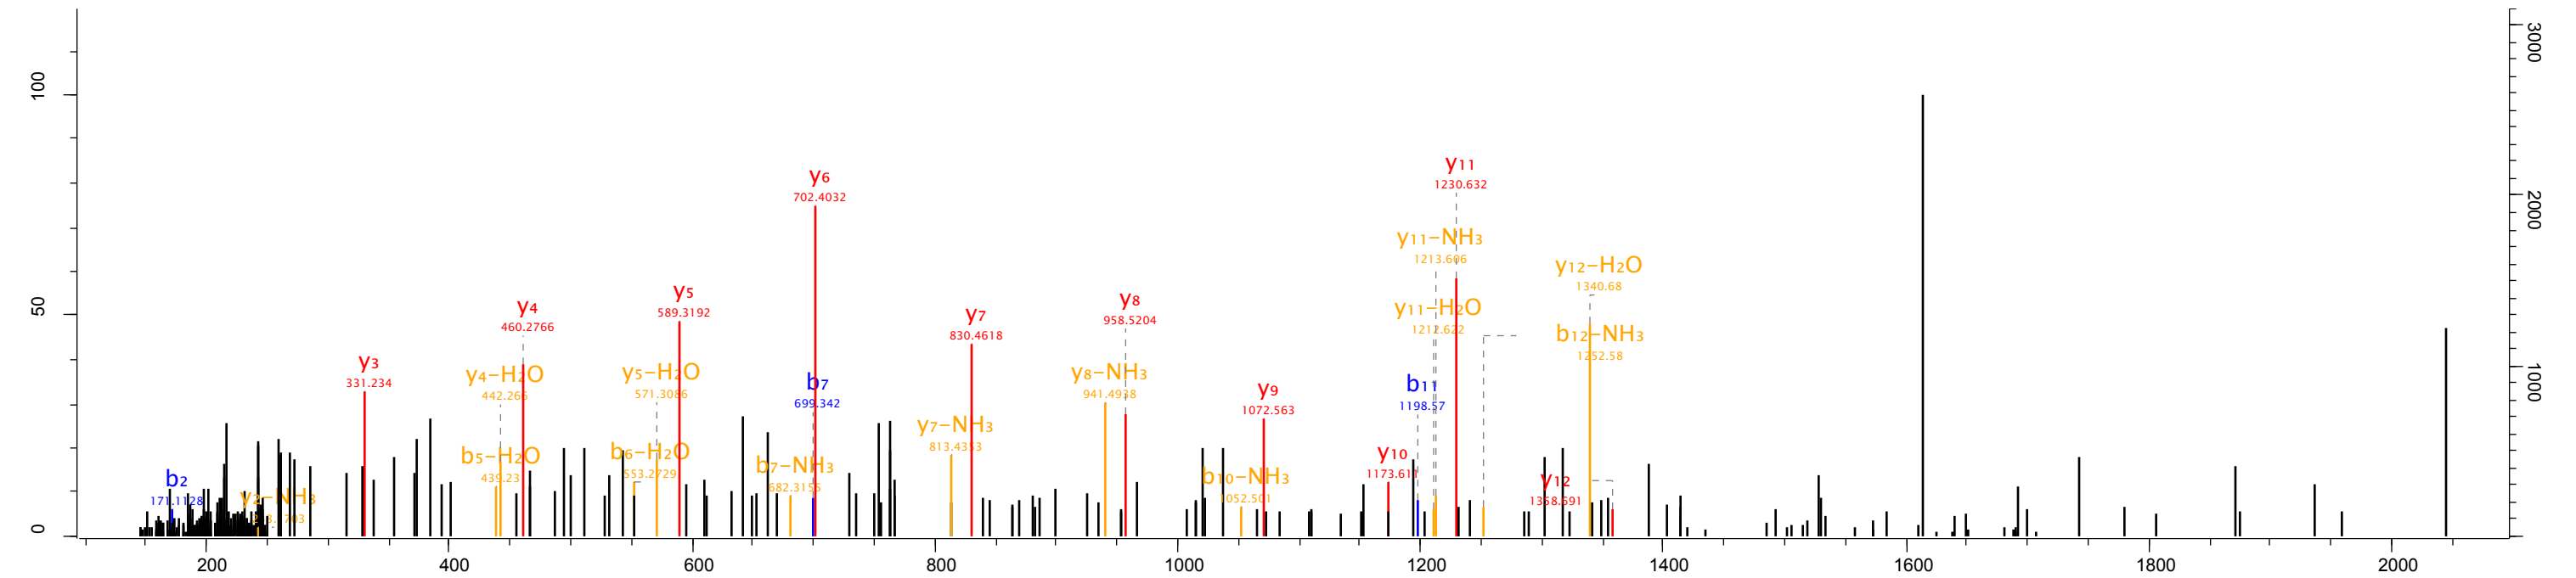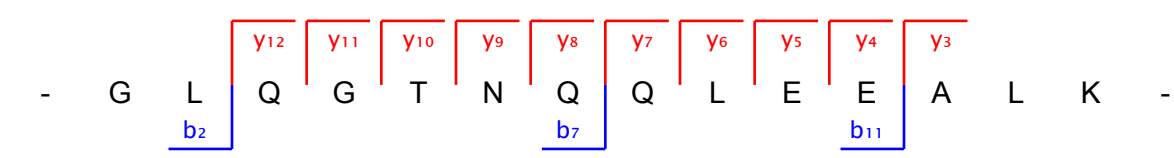

Raw file  
20150307\_NSC2\_Top\_opt\_F2\_01\_1688

Scan 44883 Method TOF; CID Score 100.93 m/z 676.83 Gene names Zdhhc6

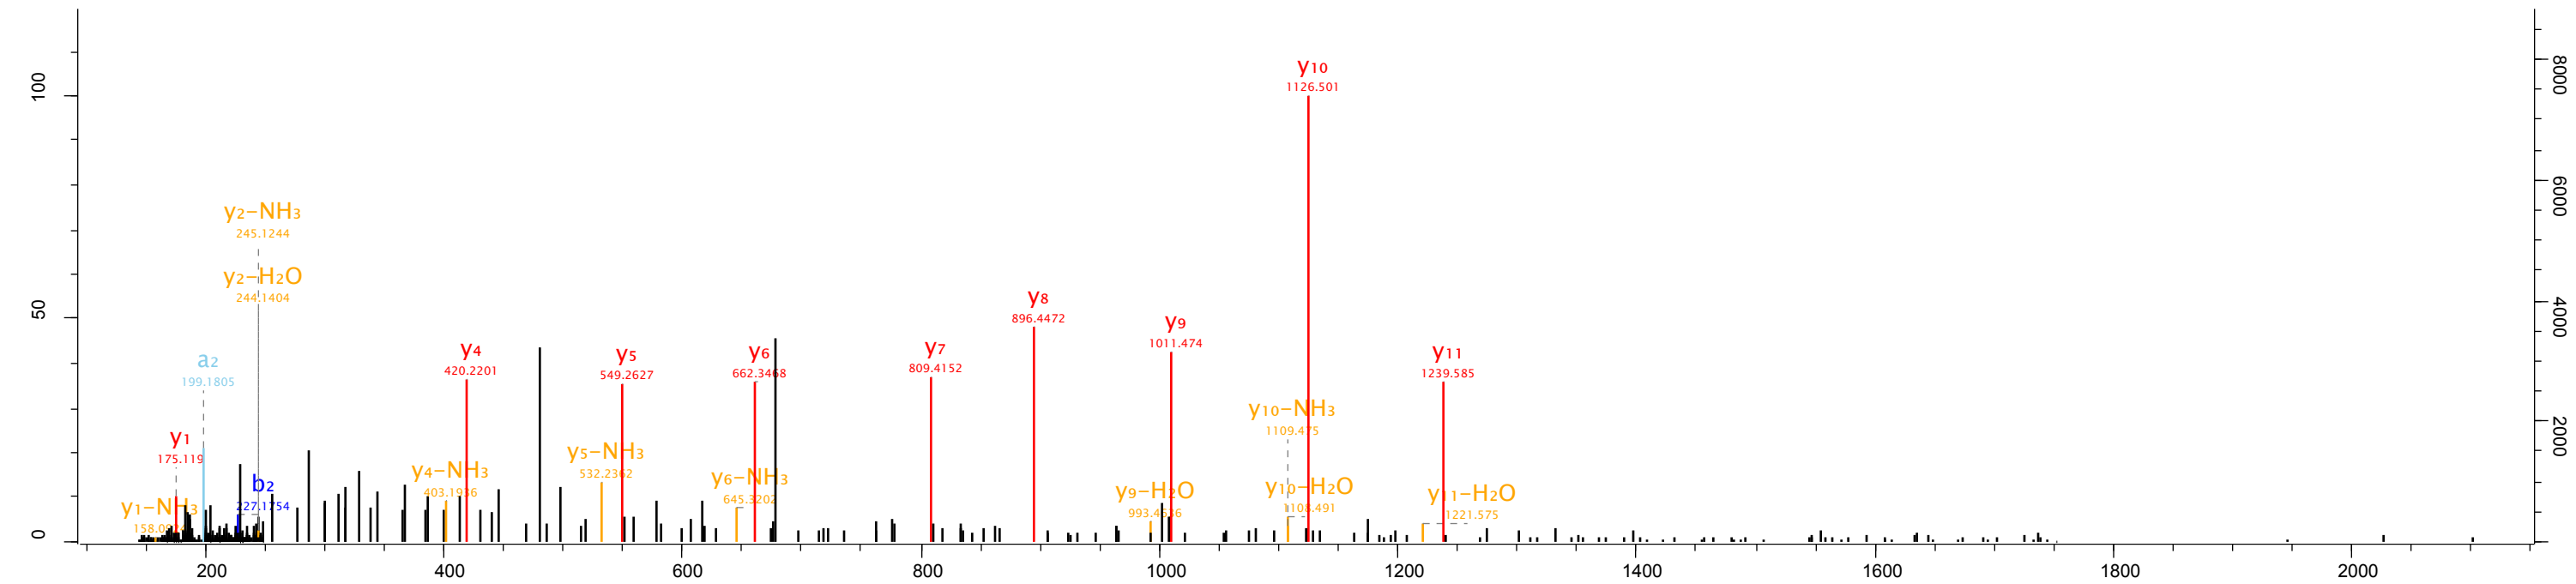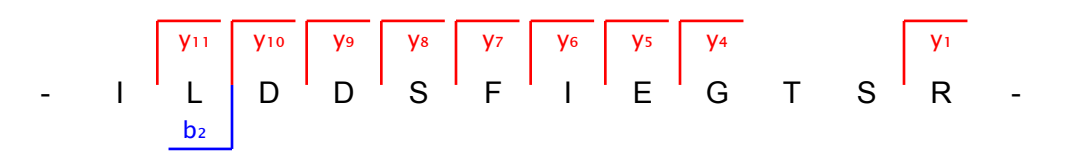

Raw file 20150307\_NSC2\_Top\_opt\_F2\_01\_1688 Scan 45486 Method TOF; CID Score 50.87 m/z 699.68

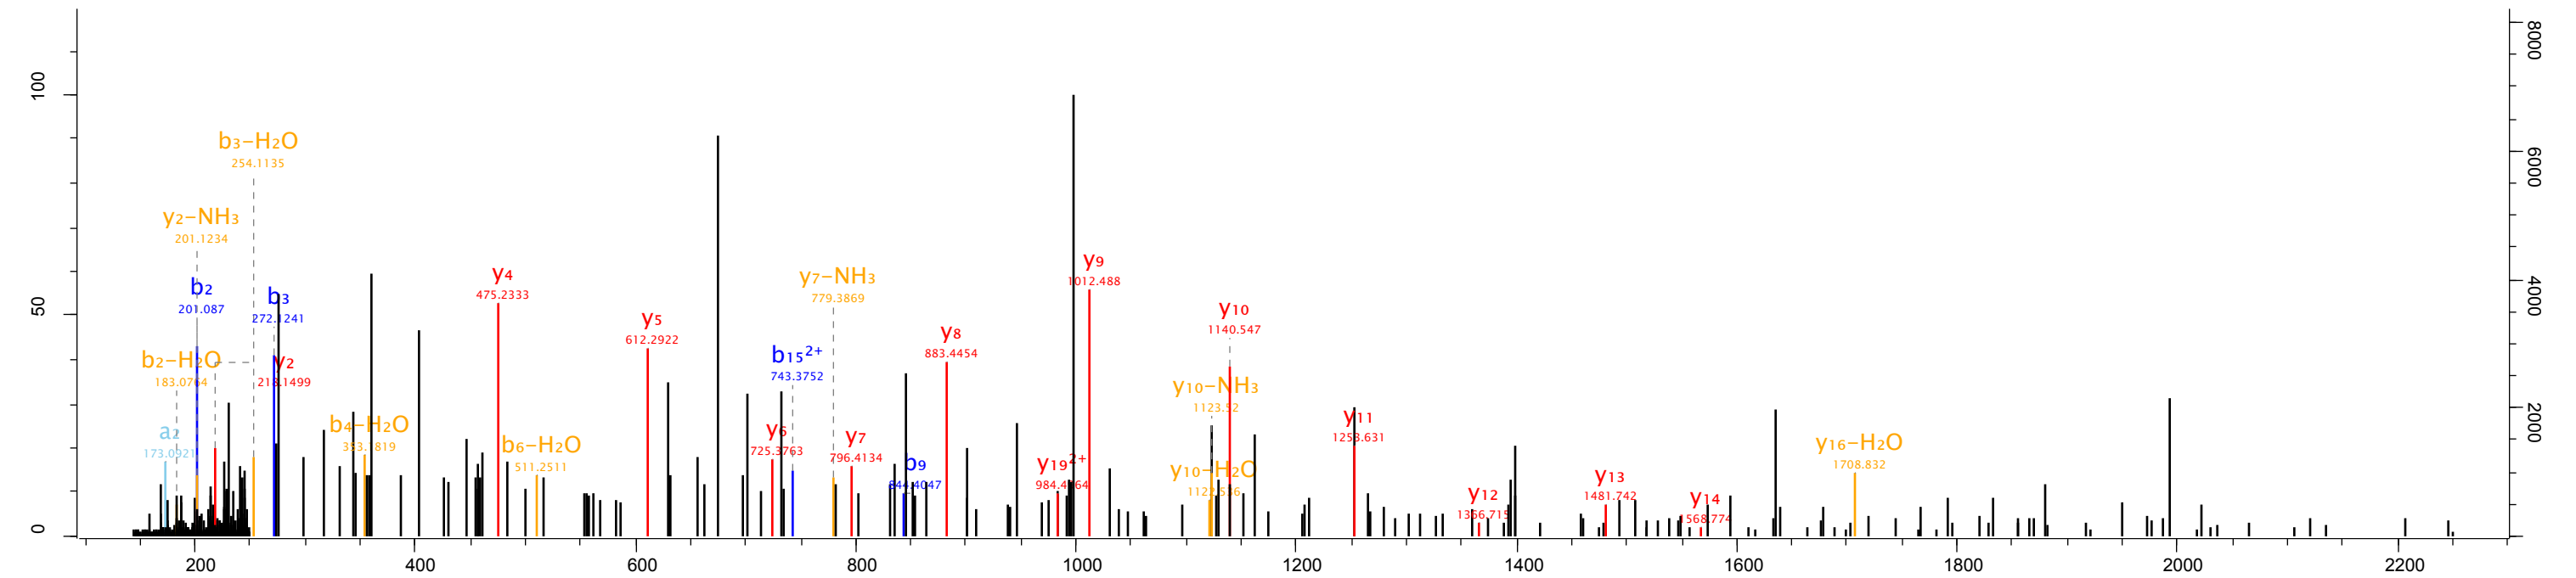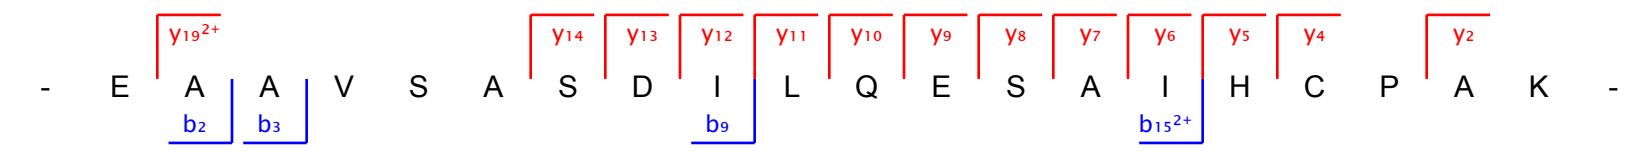



Raw file  
20150307\_NSC2\_Top\_opt\_F2\_01\_1688

Scan 48560 Method TOF; CID Score 65.72 m/z 512.33 Gene names Rrad

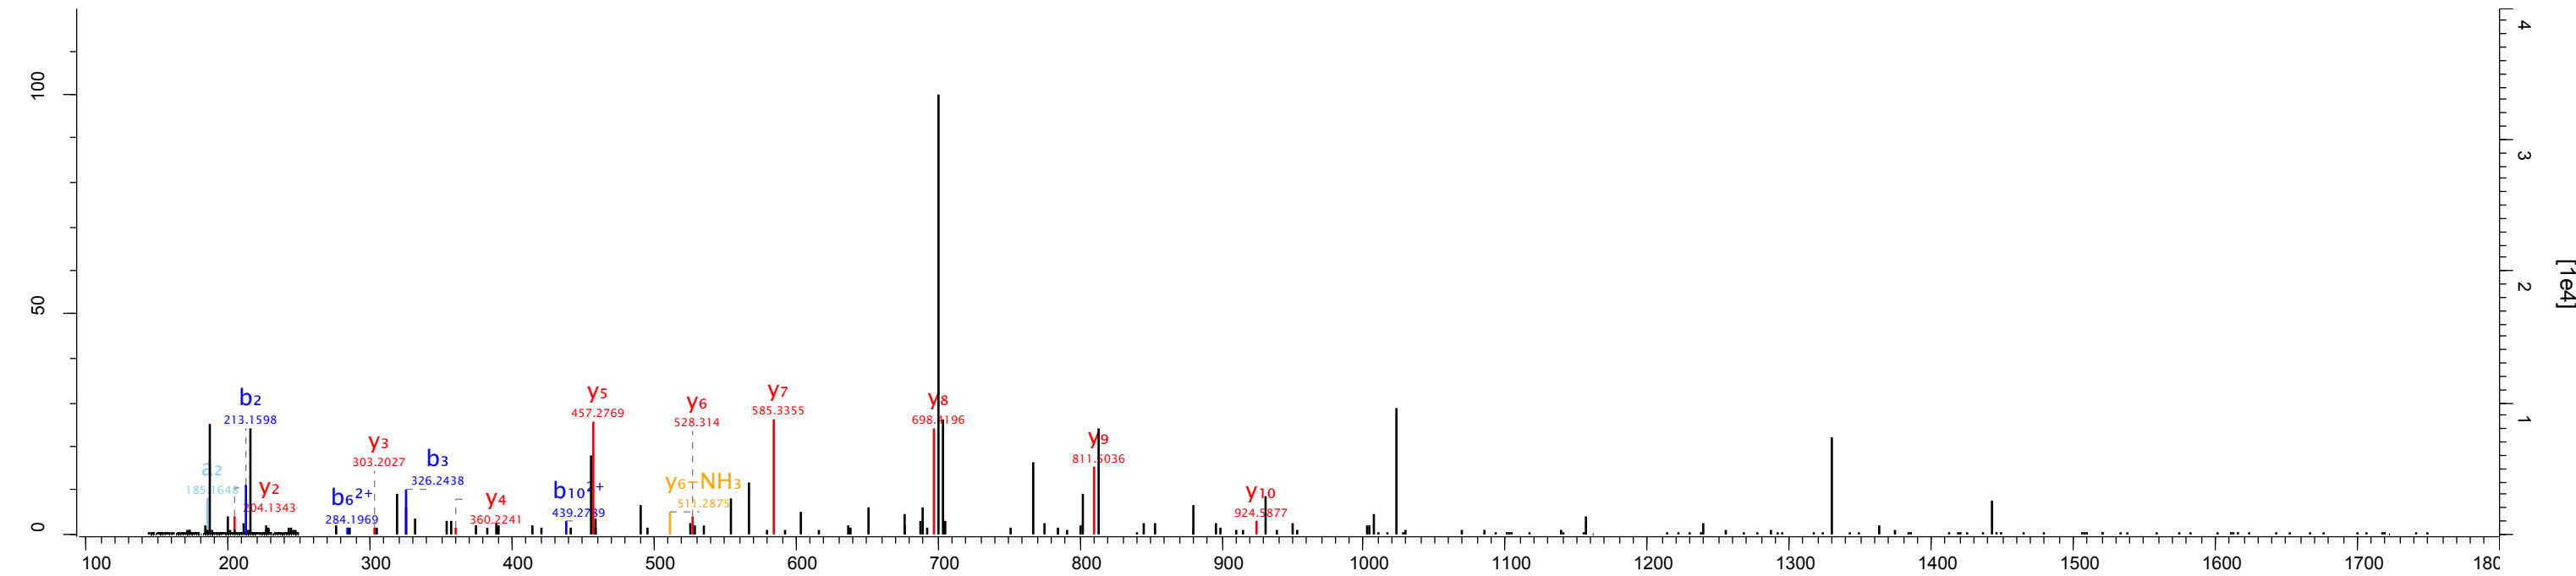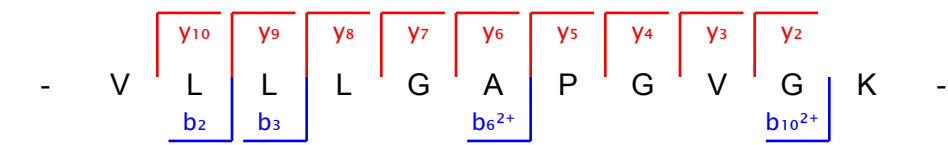

Raw file 20150307\_NSC2\_Top\_opt\_F2\_01\_1688 Scan 50739 Method TOF; CID Score 79.65 m/z 718.41 Gene names Timm22

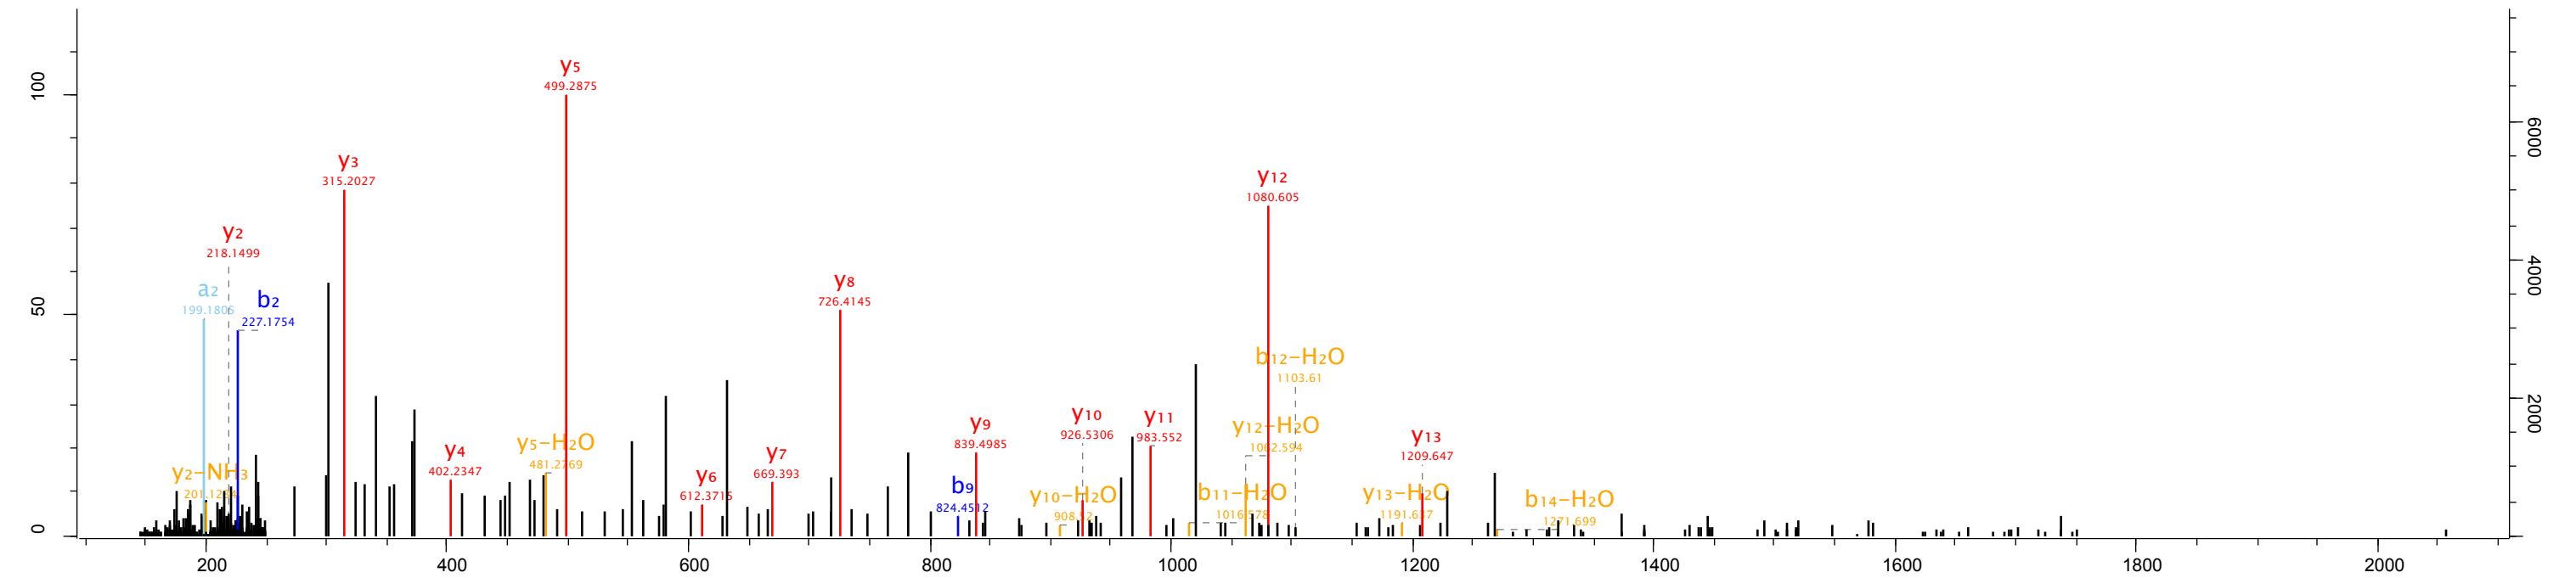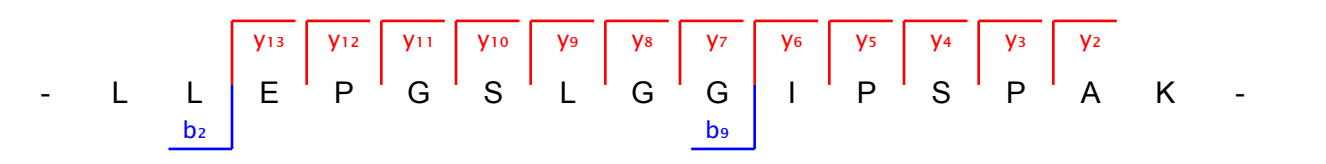

Raw file 20150307\_NSC2\_Top\_opt\_F2\_01\_1688 Scan 50868 Method TOF; CID Score 59.23 m/z 785.4 Gene names Thsd7a

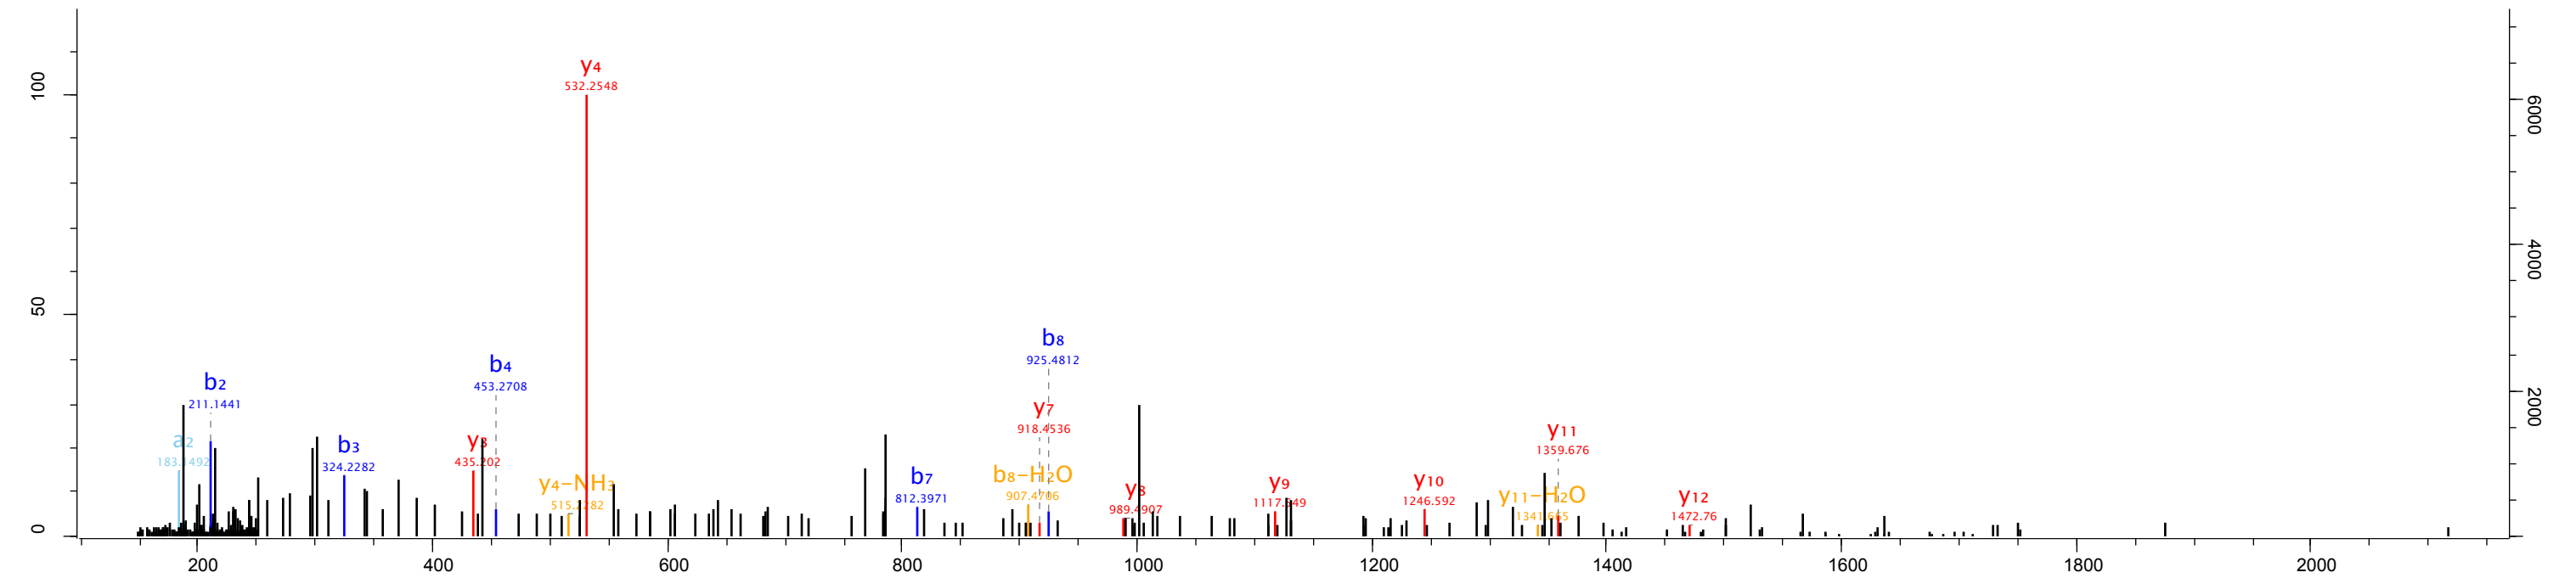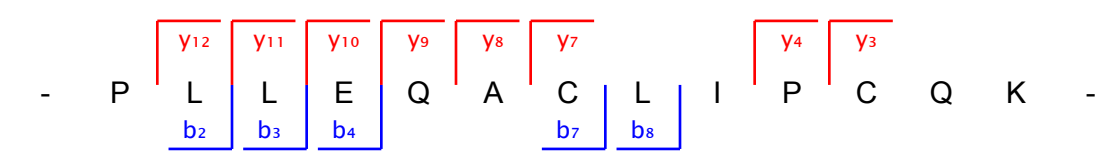

Raw file 20150307\_NSC2\_Top\_opt\_F2\_01\_1688 Scan 53066 Method TOF; CID Score 49.43 m/z 986.46 Gene names Wdr47

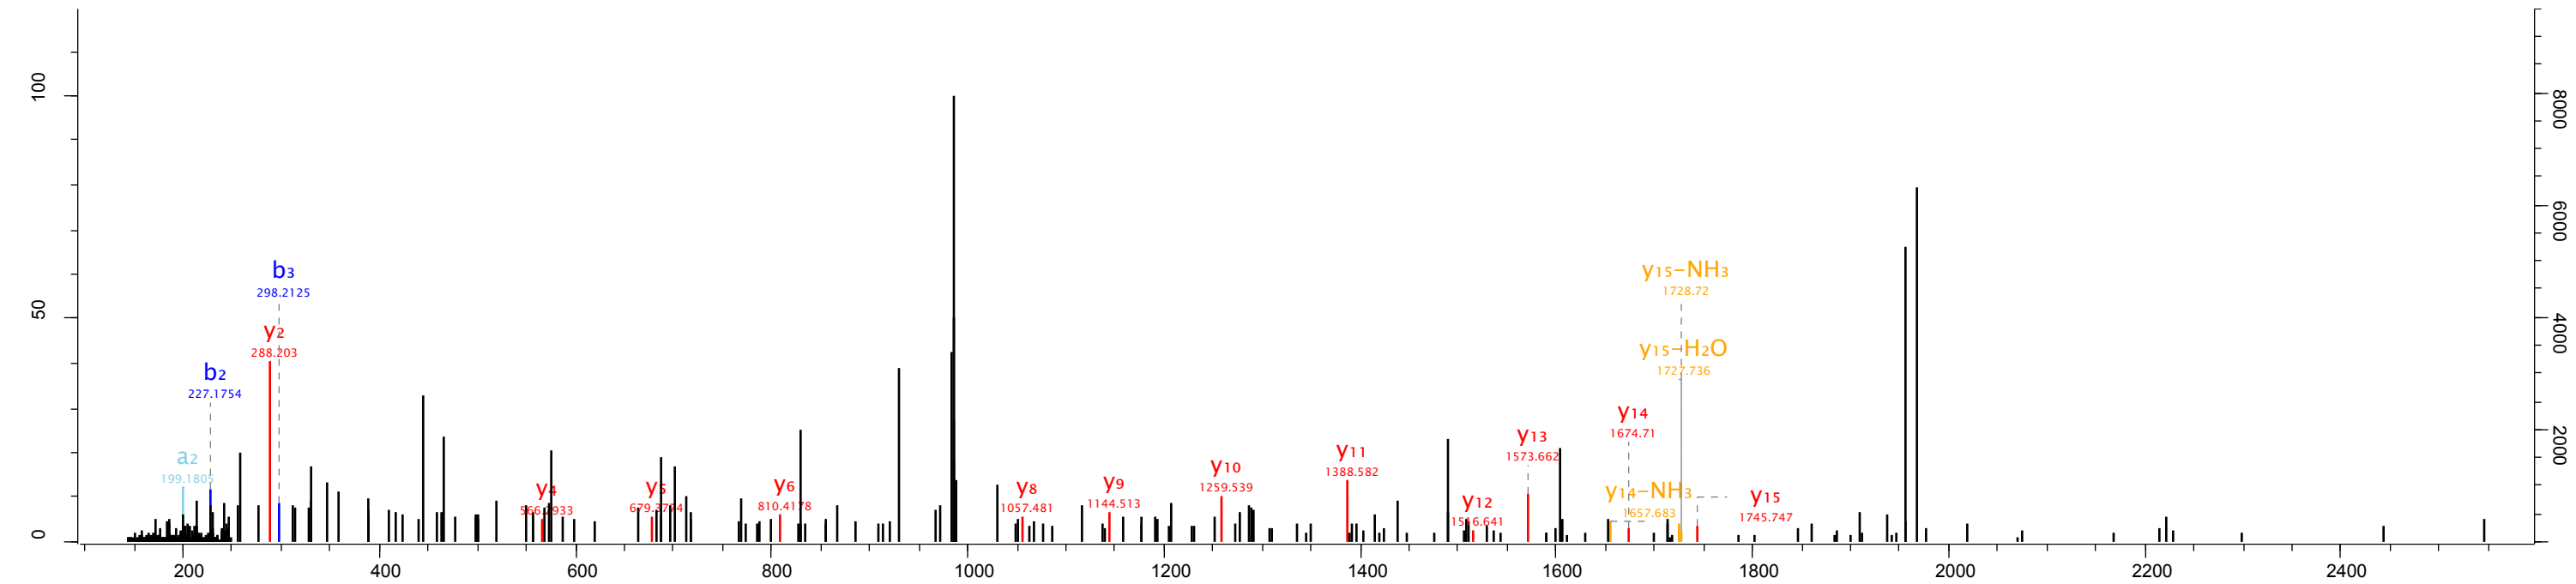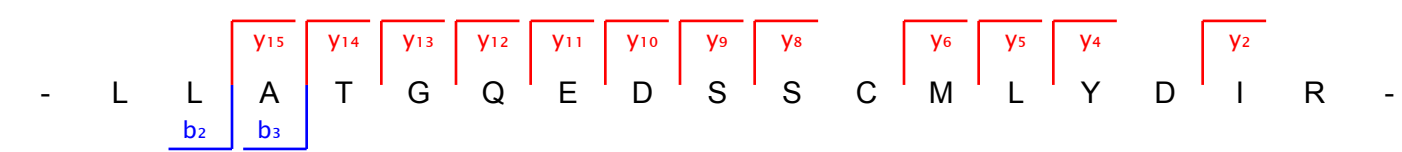

Raw file 20150307\_NSC2\_Top\_opt\_F2\_01\_1688 Scan 53083 Method TOF; CID Score 77.19 m/z 595.34 Gene names Exd2

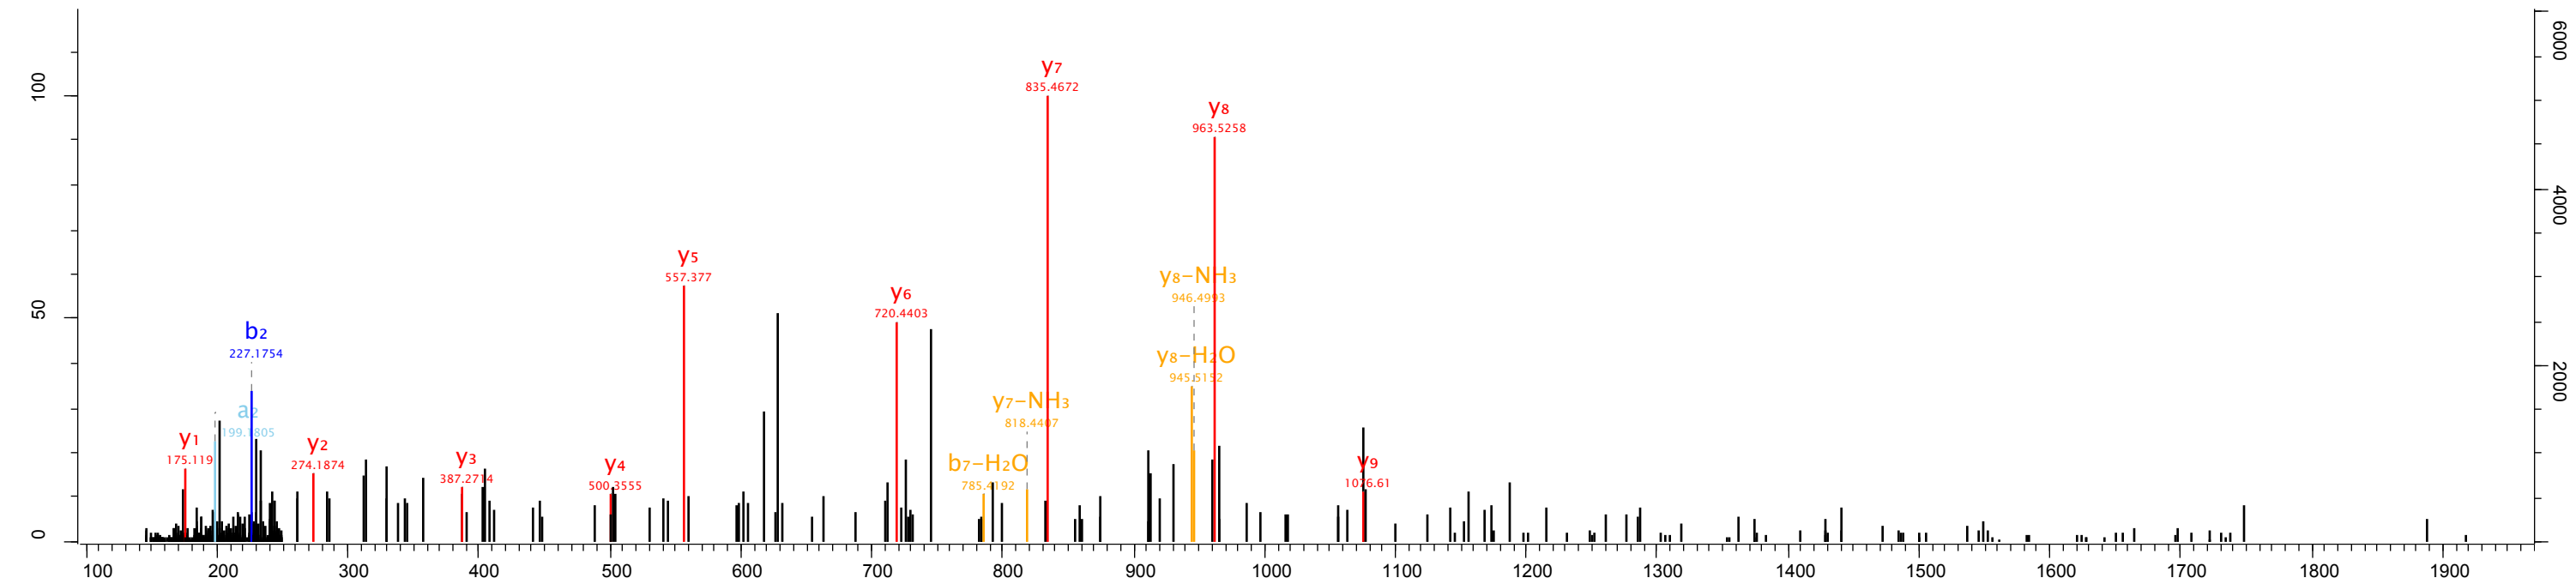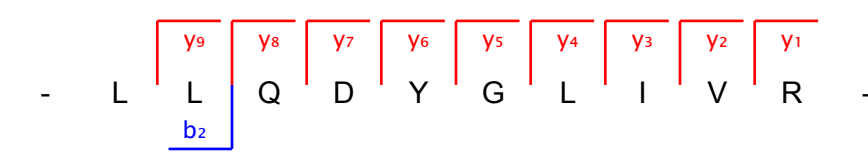

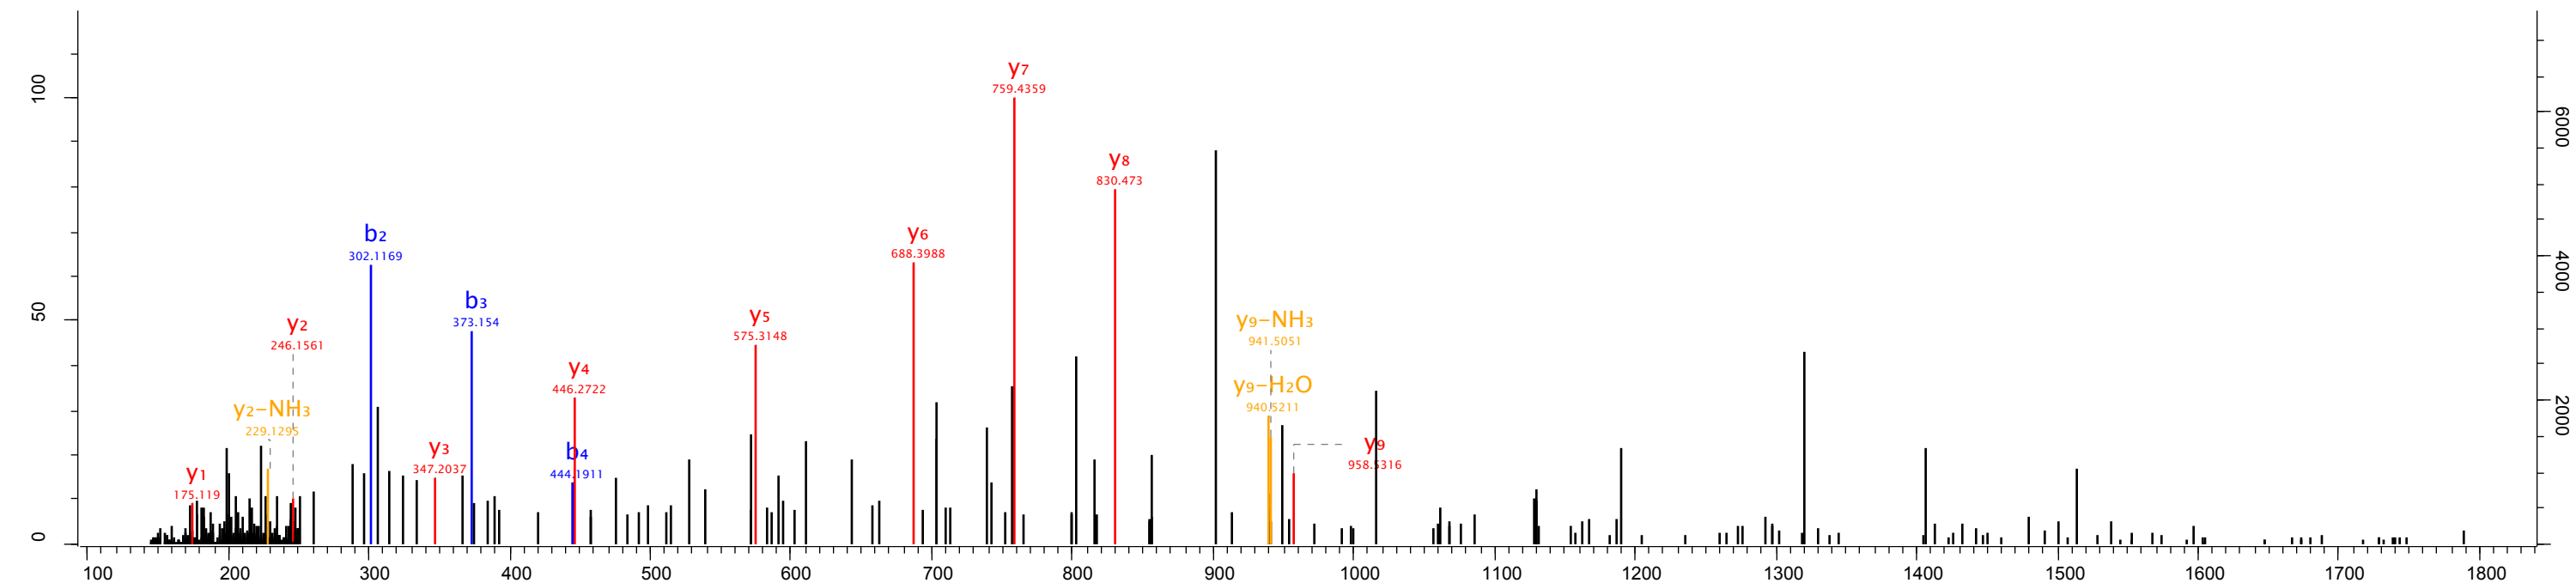

ac  
- M Q A A L E V T A R -

Fragmentation scheme diagram showing amino acid sequence M Q A A L E V T A R - with b and y ions indicated by brackets above and below the sequence.

- Red brackets above the sequence indicate y ions: y9 (M-Q), y8 (Q-A), y7 (A-A), y6 (A-L), y5 (L-E), y4 (E-V), y3 (V-T), y2 (T-A), y1 (A-R).
- Blue brackets below the sequence indicate b ions: b2 (Q-A), b3 (A-A), b4 (A-L).

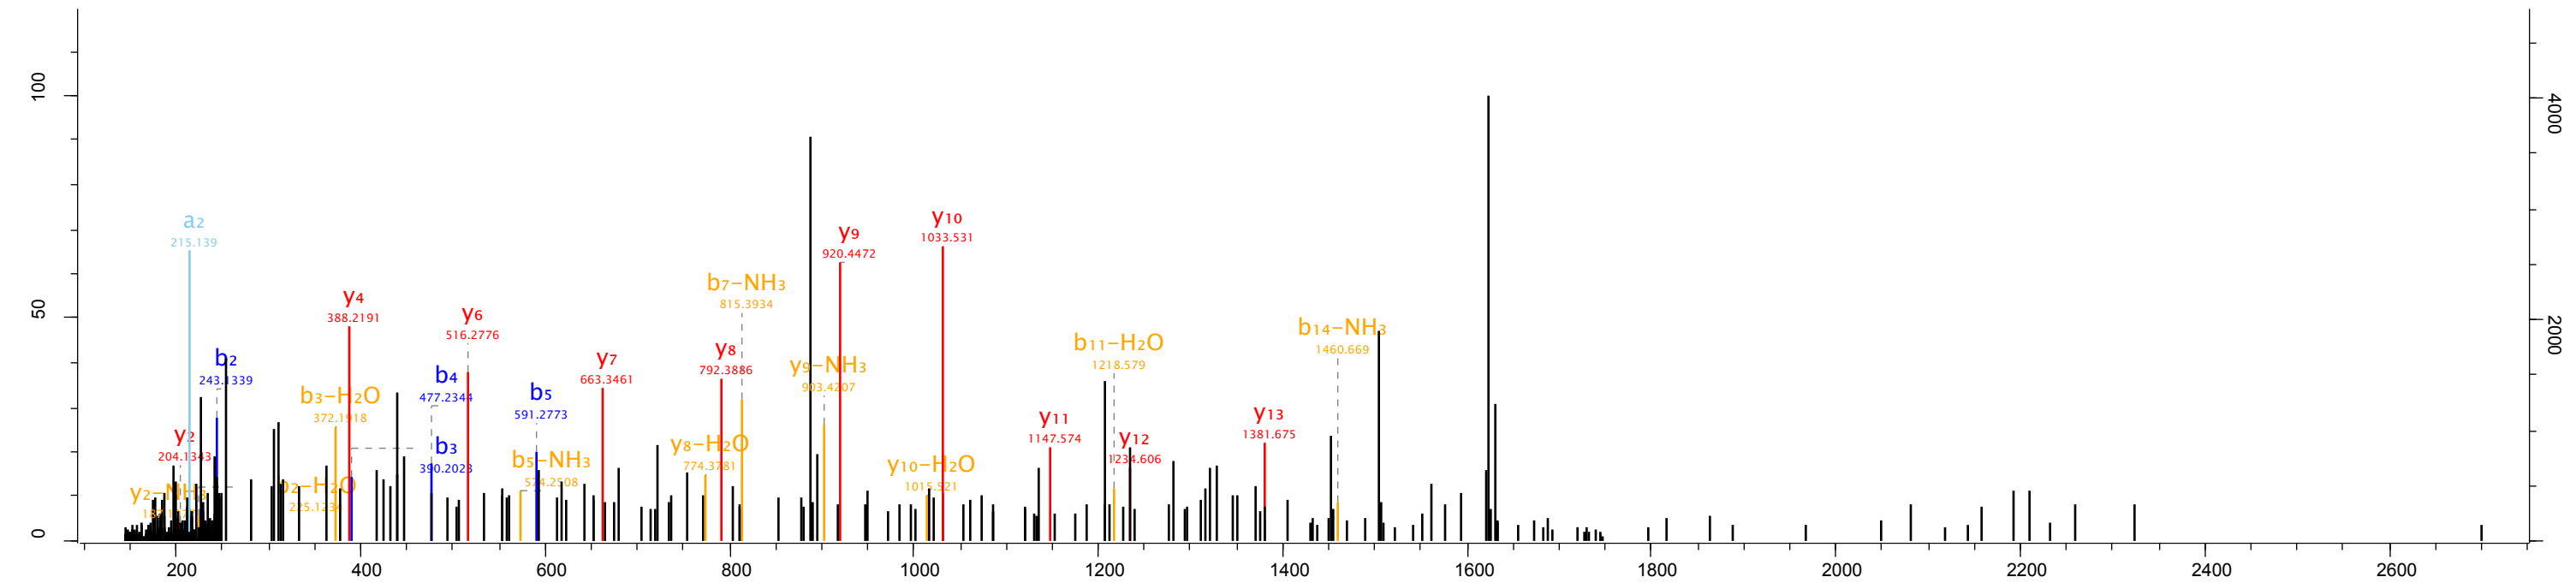

- E L F S N L Q E F A G P S G K -

b2 b3 b4 b5 y13 y12 y11 y10 y9 y8 y7 y6 y4 y2

Raw file 20150307\_NSC2\_Top\_opt\_F2\_01\_1688 Scan 58928 Method TOF; CID Score 96.82 m/z 713.39 Gene names Med27

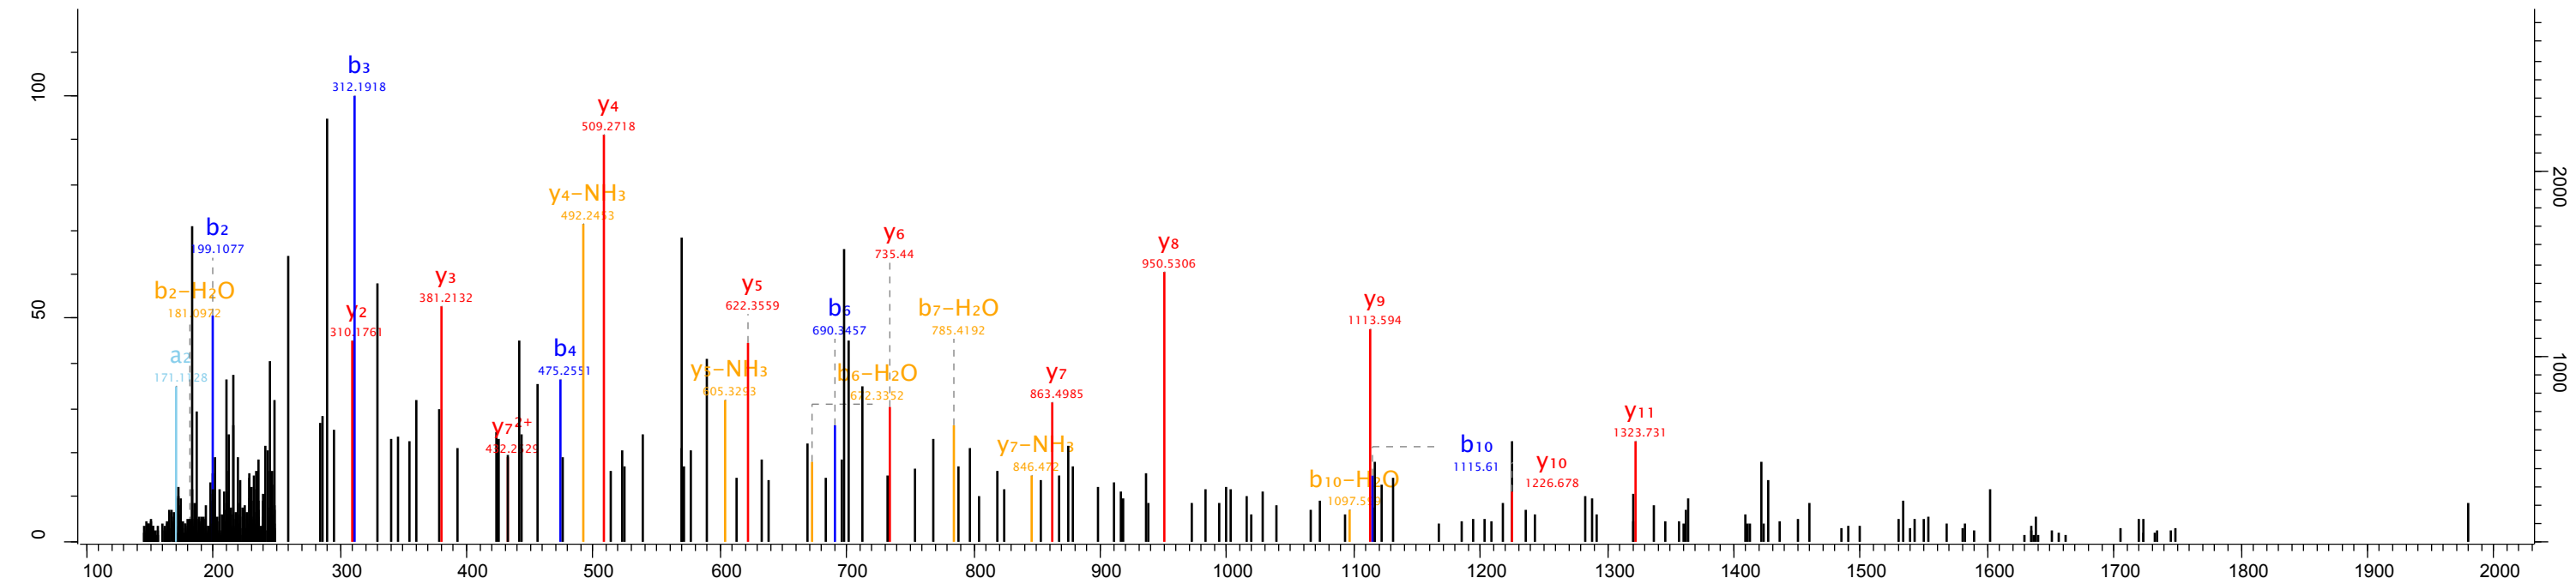

- T P L Y S Q L L Q A Y K -

Fragmentation mapping (b and y ions):

- b<sub>2</sub> (P), b<sub>3</sub> (L), b<sub>4</sub> (Y), b<sub>6</sub> (Q), b<sub>10</sub> (A)
- y<sub>2</sub> (Y), y<sub>3</sub> (S), y<sub>4</sub> (Q), y<sub>5</sub> (L), y<sub>6</sub> (L), y<sub>7</sub> (Q), y<sub>8</sub> (S), y<sub>9</sub> (Y), y<sub>10</sub> (L), y<sub>11</sub> (P)



Raw file  
20150307\_NSC2\_Top\_opt\_F2\_01\_1688

Scan 70592 Method TOF; CID Score 30.7 m/z 963.48 Gene names Snrk

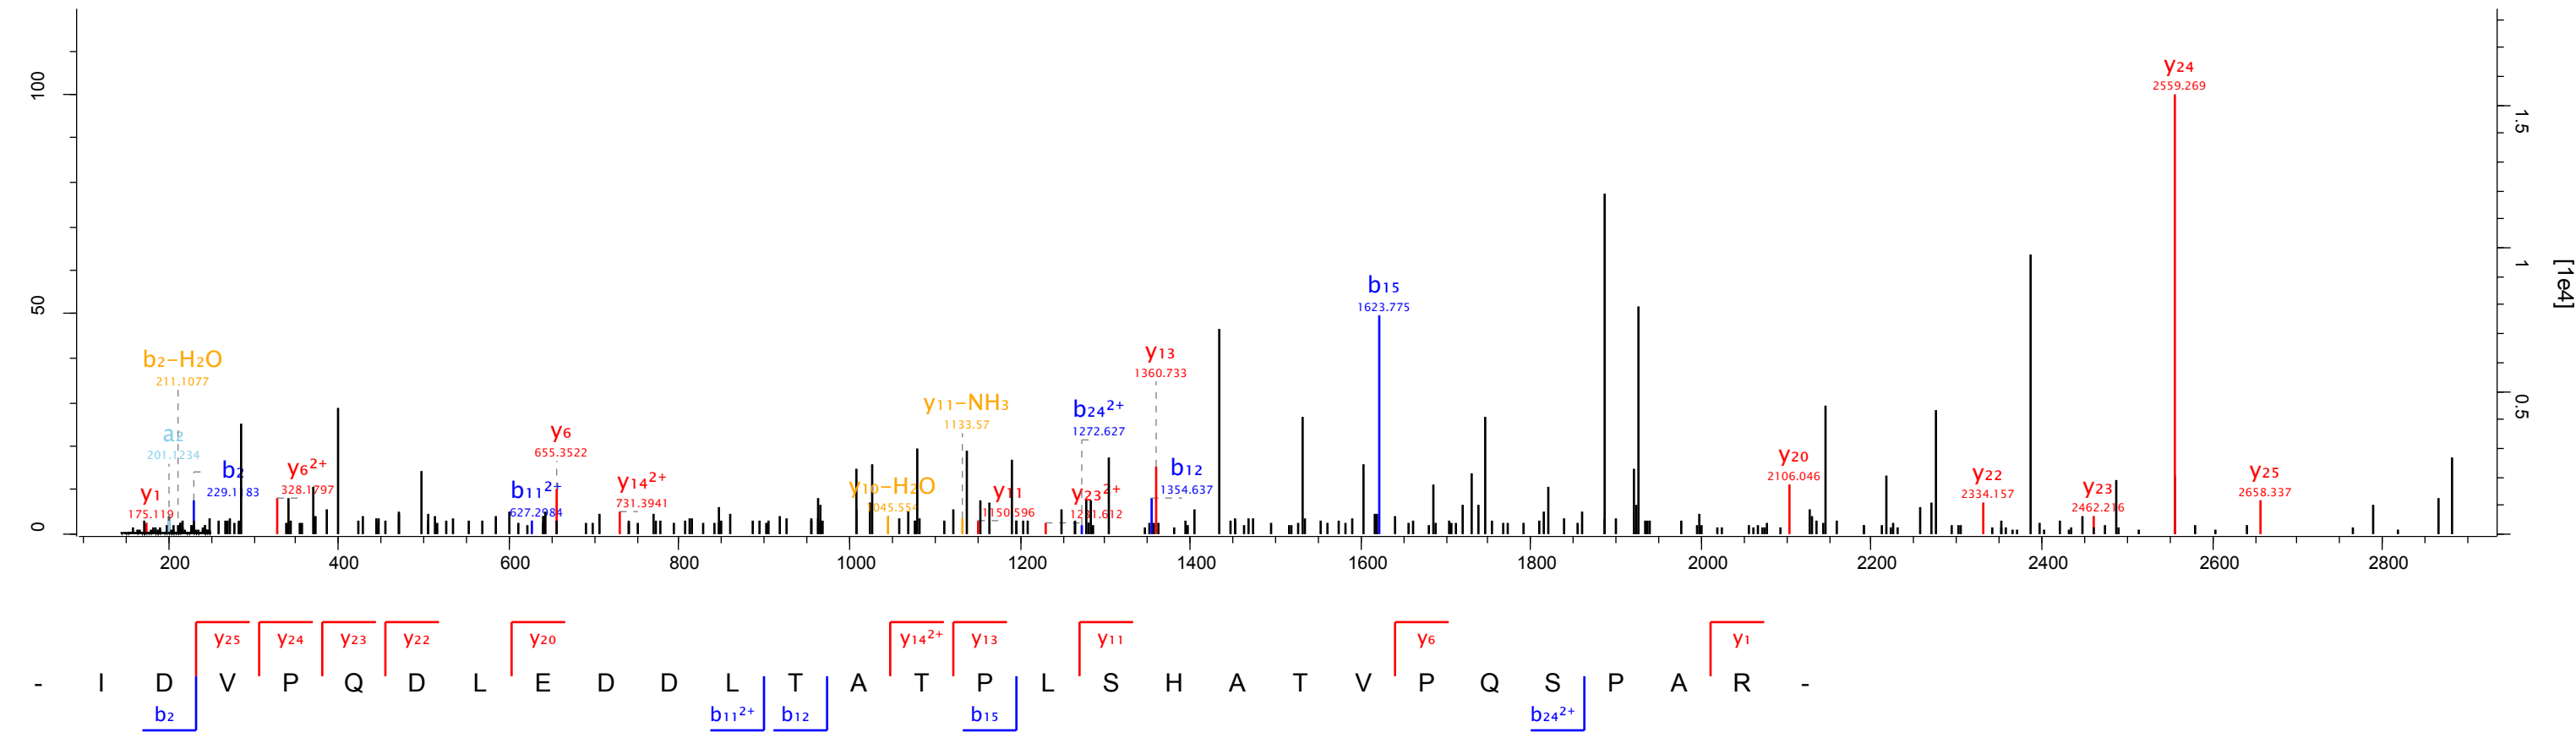

Raw file  
20150307\_NSC2\_Top\_opt\_F2\_01\_1688

Scan 76458 Method TOF; CID Score 53.48 m/z 957.48 Gene names Nbea

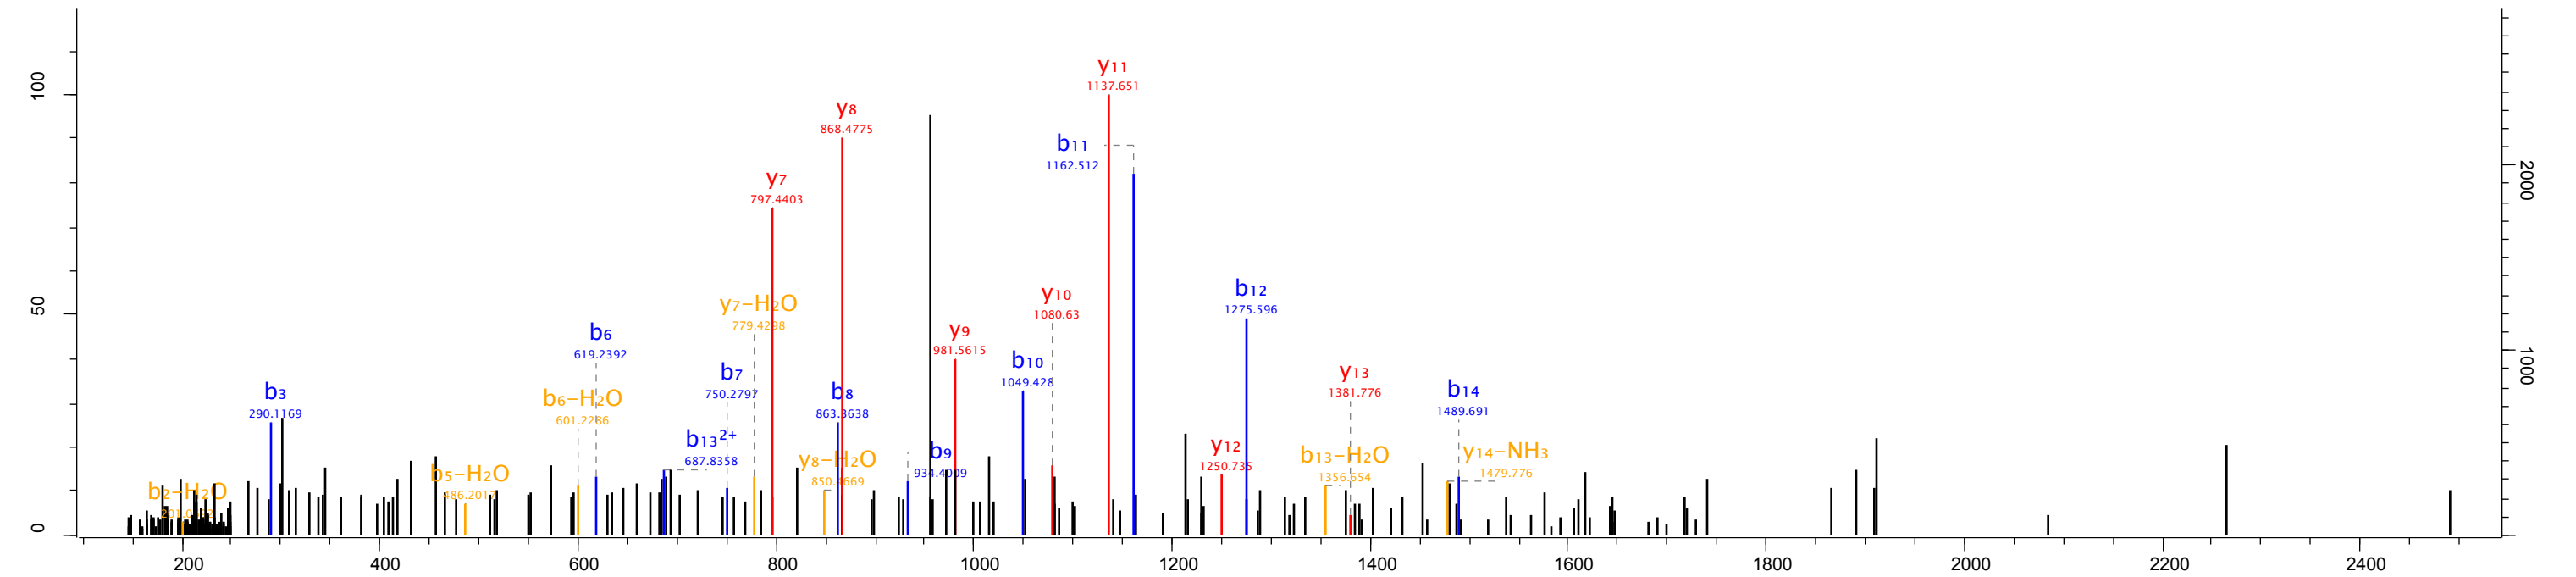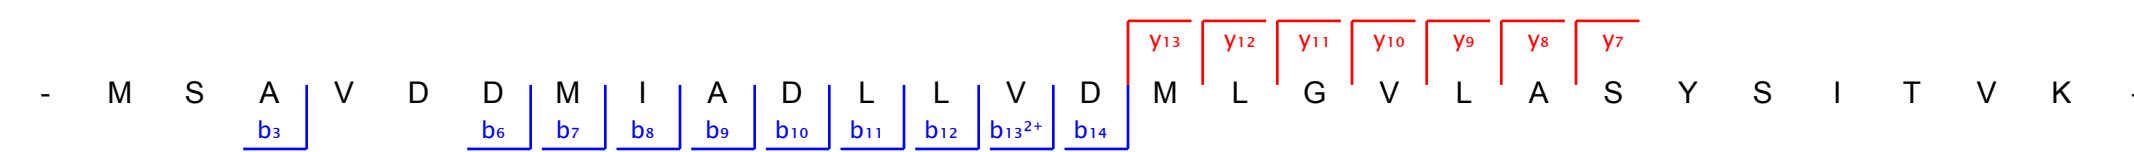

Raw file  
20150307\_NSC3\_Top\_opt\_F3\_01\_1682

Scan 5024 Method TOF; CID Score 125.54 m/z 738.24 Gene names Mt3

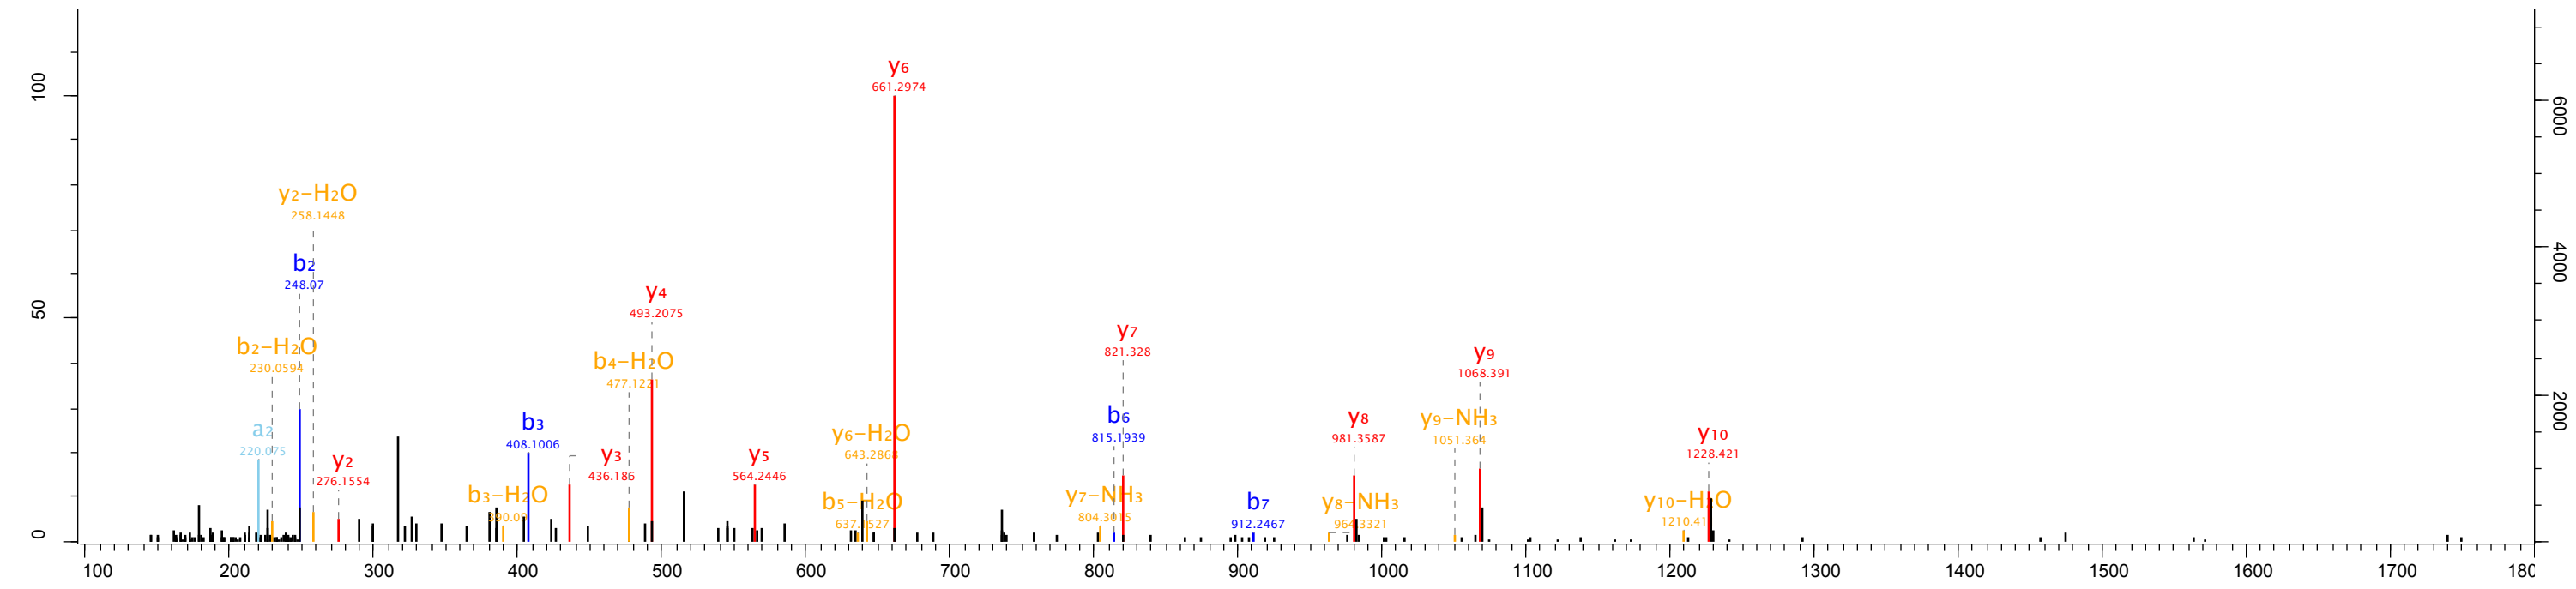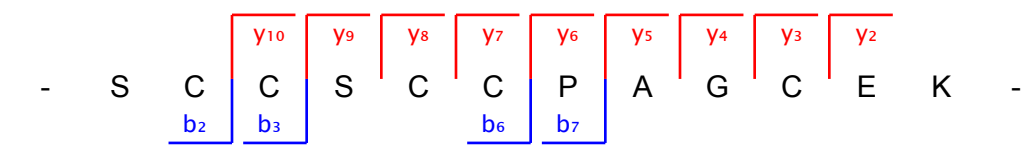

Raw file 20150307\_NSC3\_Top\_opt\_F3\_01\_1682 Scan 5313 Method TOF; CID Score 87.18 m/z 603.26 Gene names Mgarp

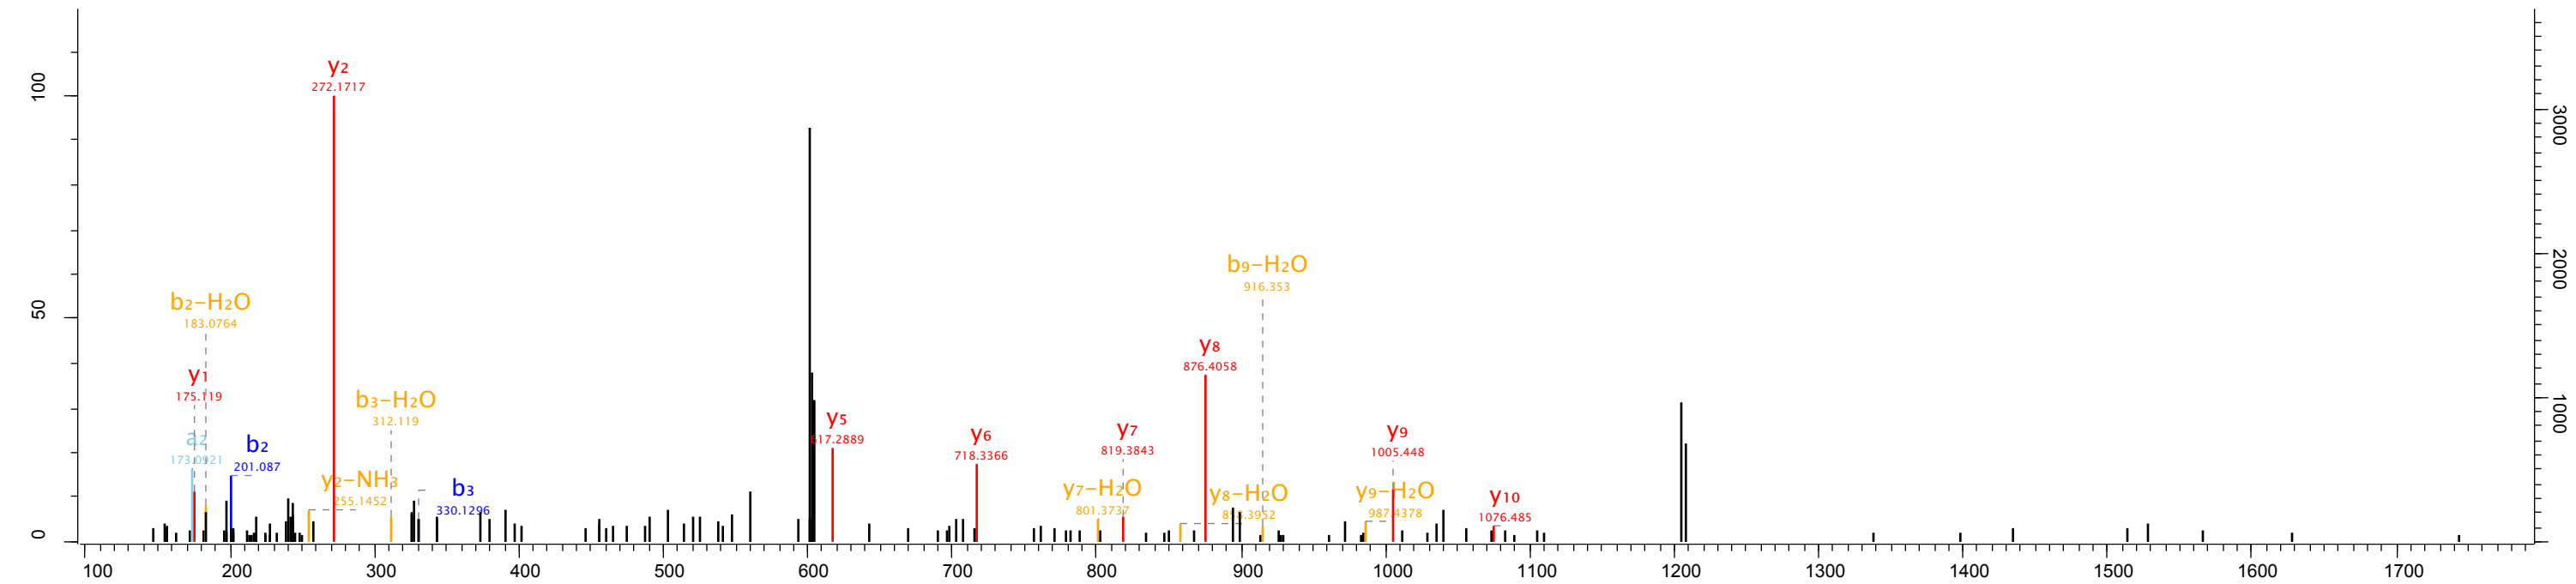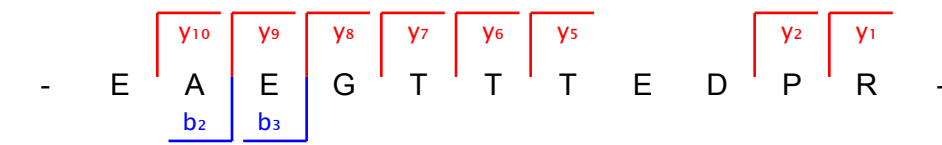

Raw file 20150307\_NSC3\_Top\_opt\_F3\_01\_1682 Scan 15987 Method TOF; CID Score 82.26 m/z 599.27 Gene names Ttf2

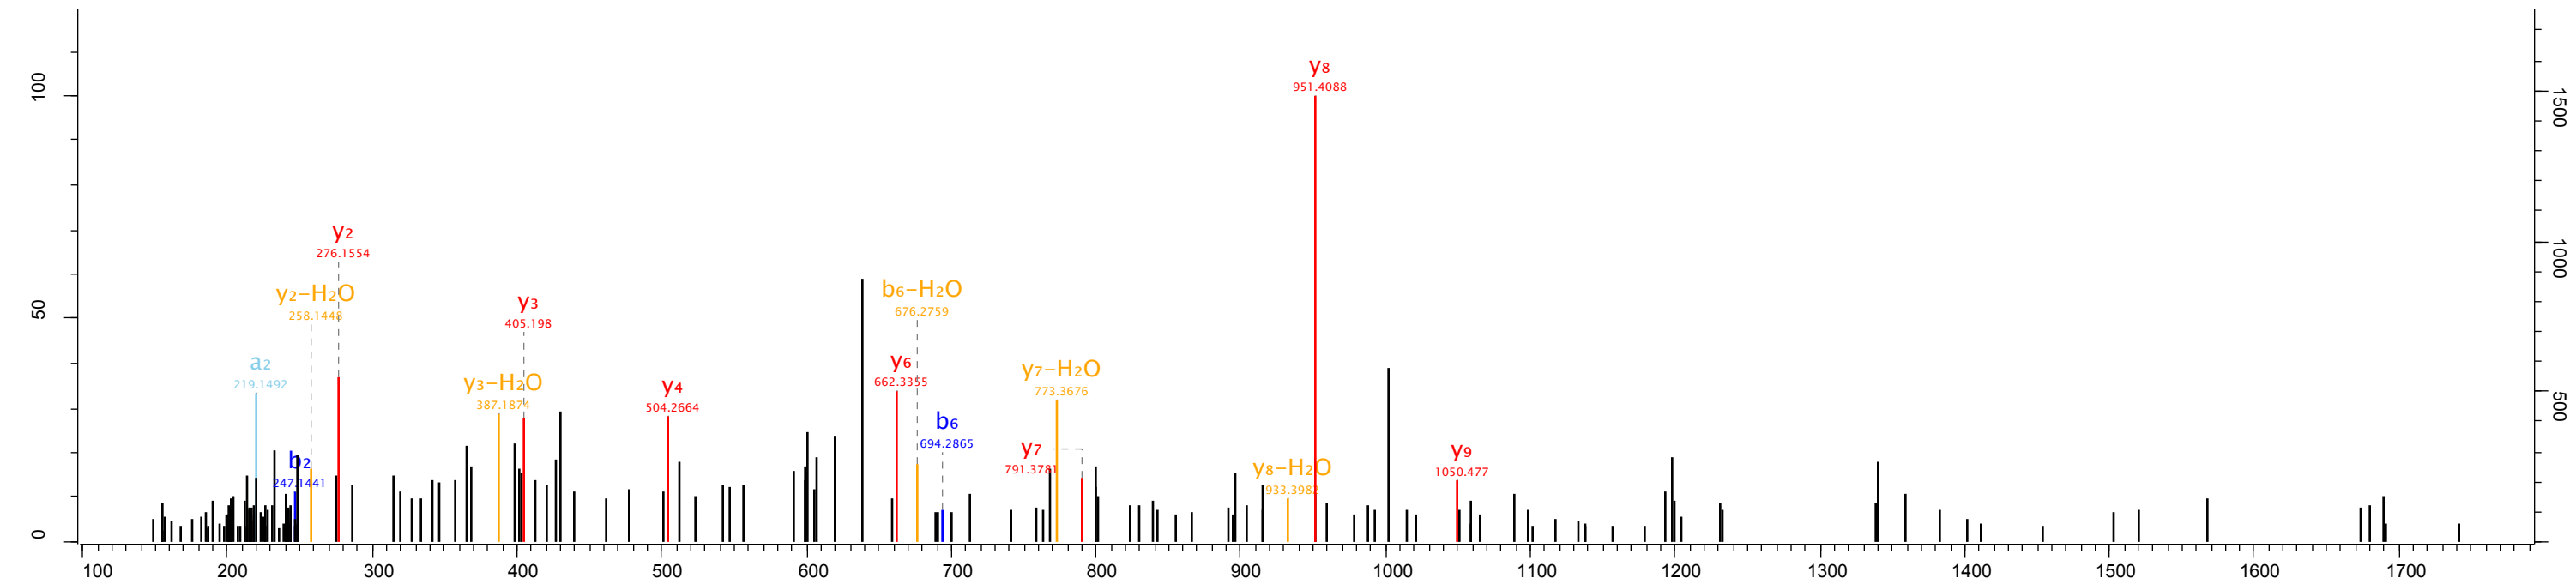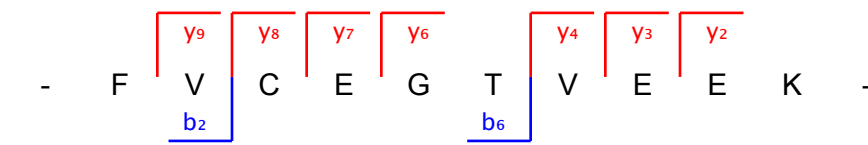

Raw file 20150307\_NSC3\_Top\_opt\_F3\_01\_1682 Scan 27952 Method TOF; CID Score 54.65 m/z 747.85 Gene names Gpm6a

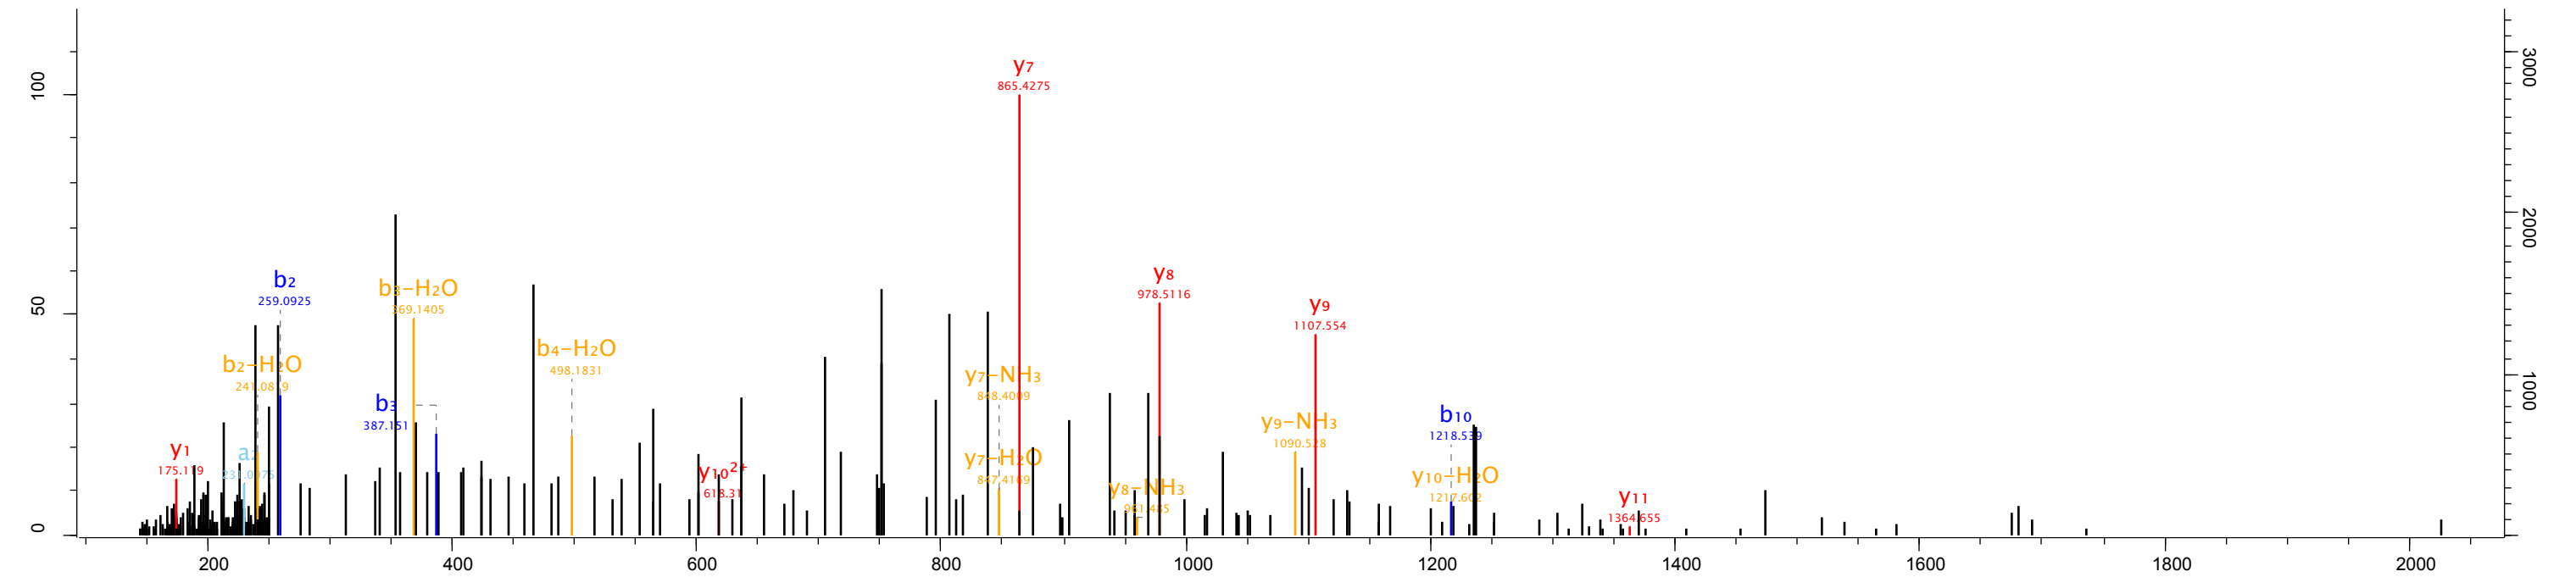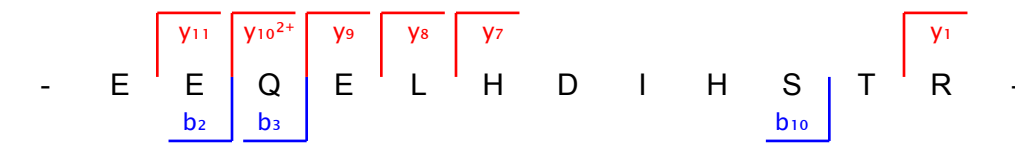

Raw file 20150307\_NSC3\_Top\_opt\_F3\_01\_1682 Scan 30030 Method TOF; CID Score 62.69 m/z 730.91 Gene names Ccdc108

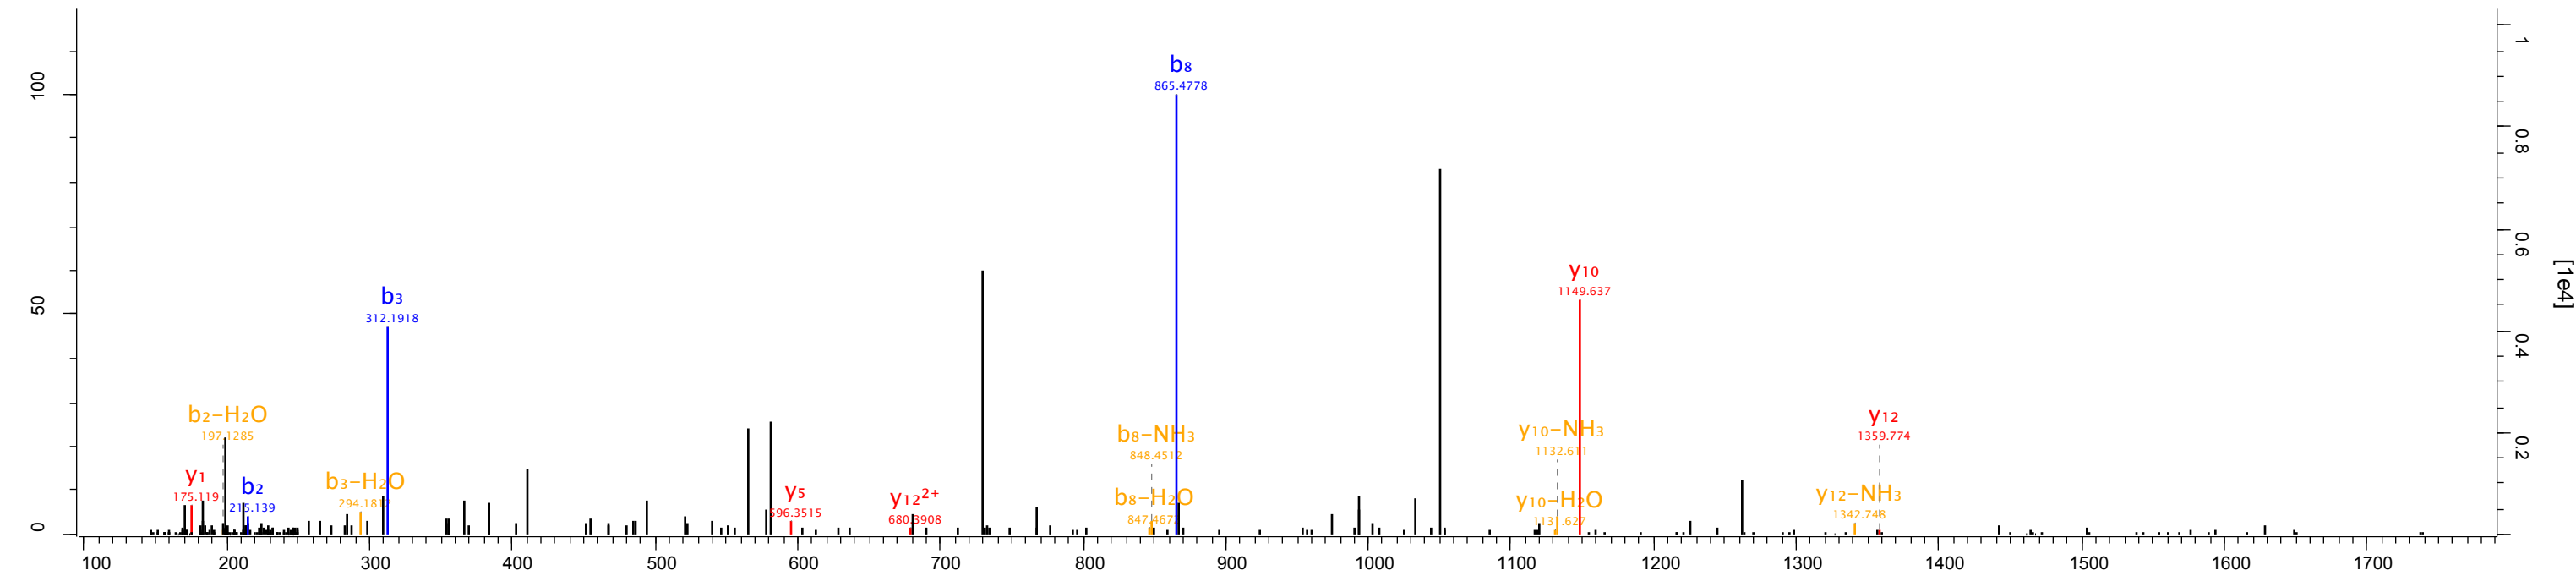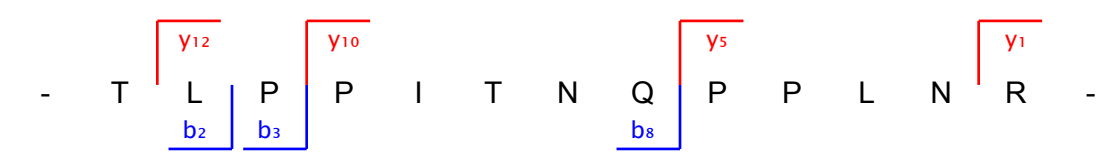

Raw file  
20150307\_NSC3\_Top\_opt\_F3\_01\_1682

Scan 38932 Method TOF; CID Score 91.27 m/z 627.37 Gene names Hic2

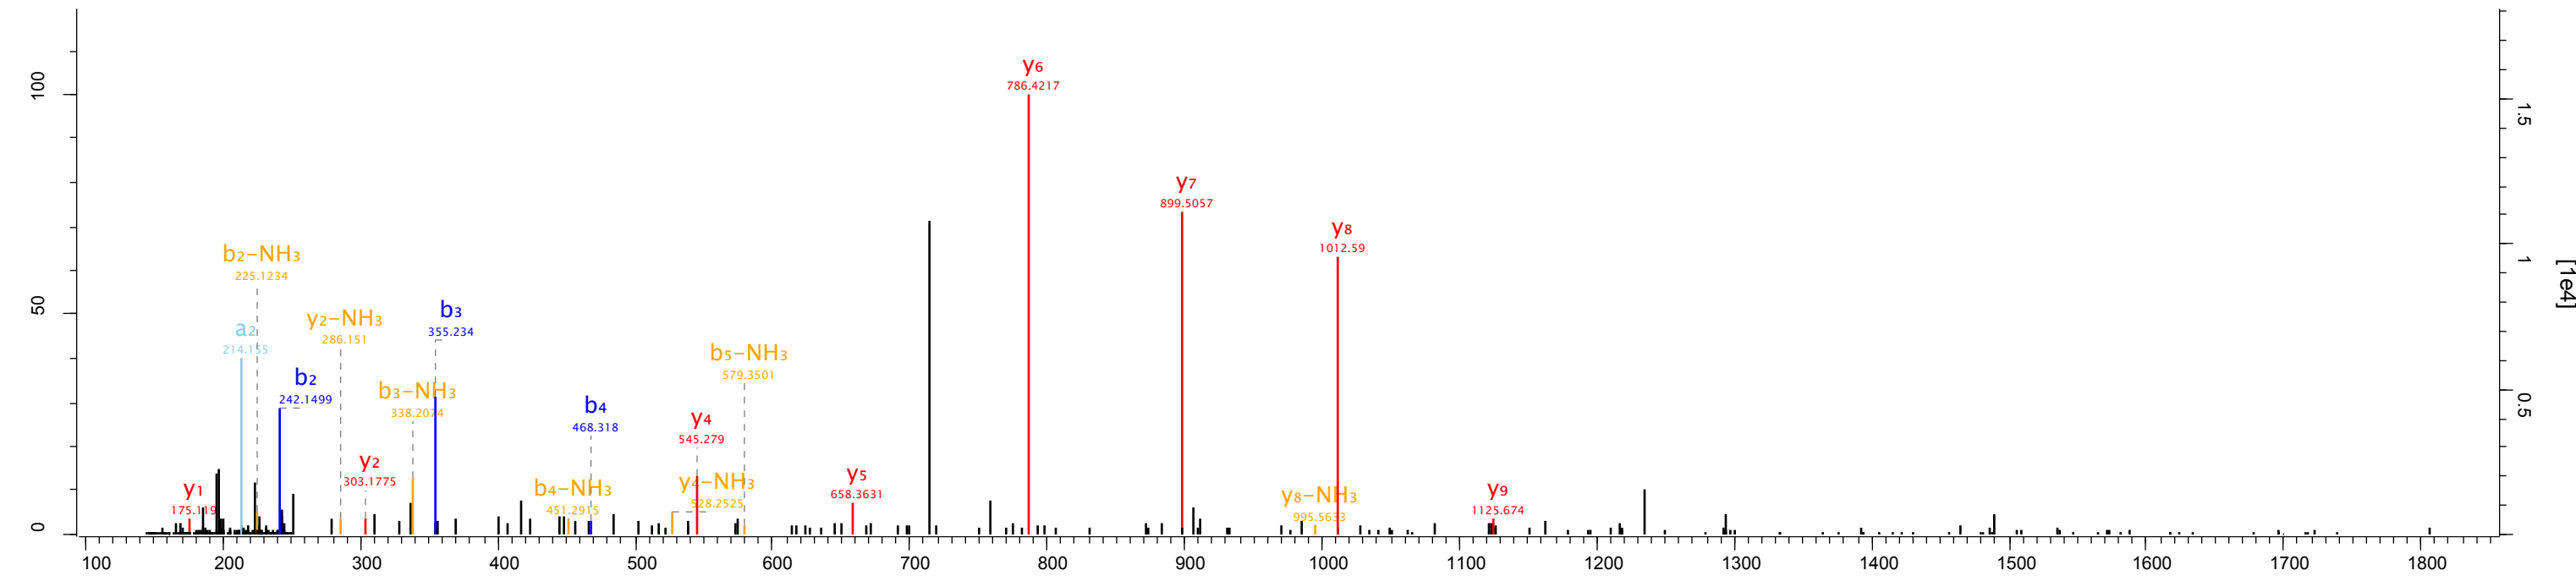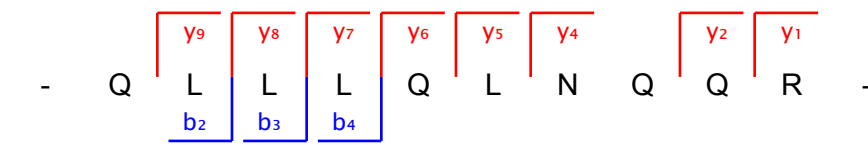



Raw file  
20150307\_NSC3\_Top\_opt\_F3\_01\_1682

Scan 58073 Method TOF; CID Score 111.57 m/z 1120.63 Gene names Cox6a1

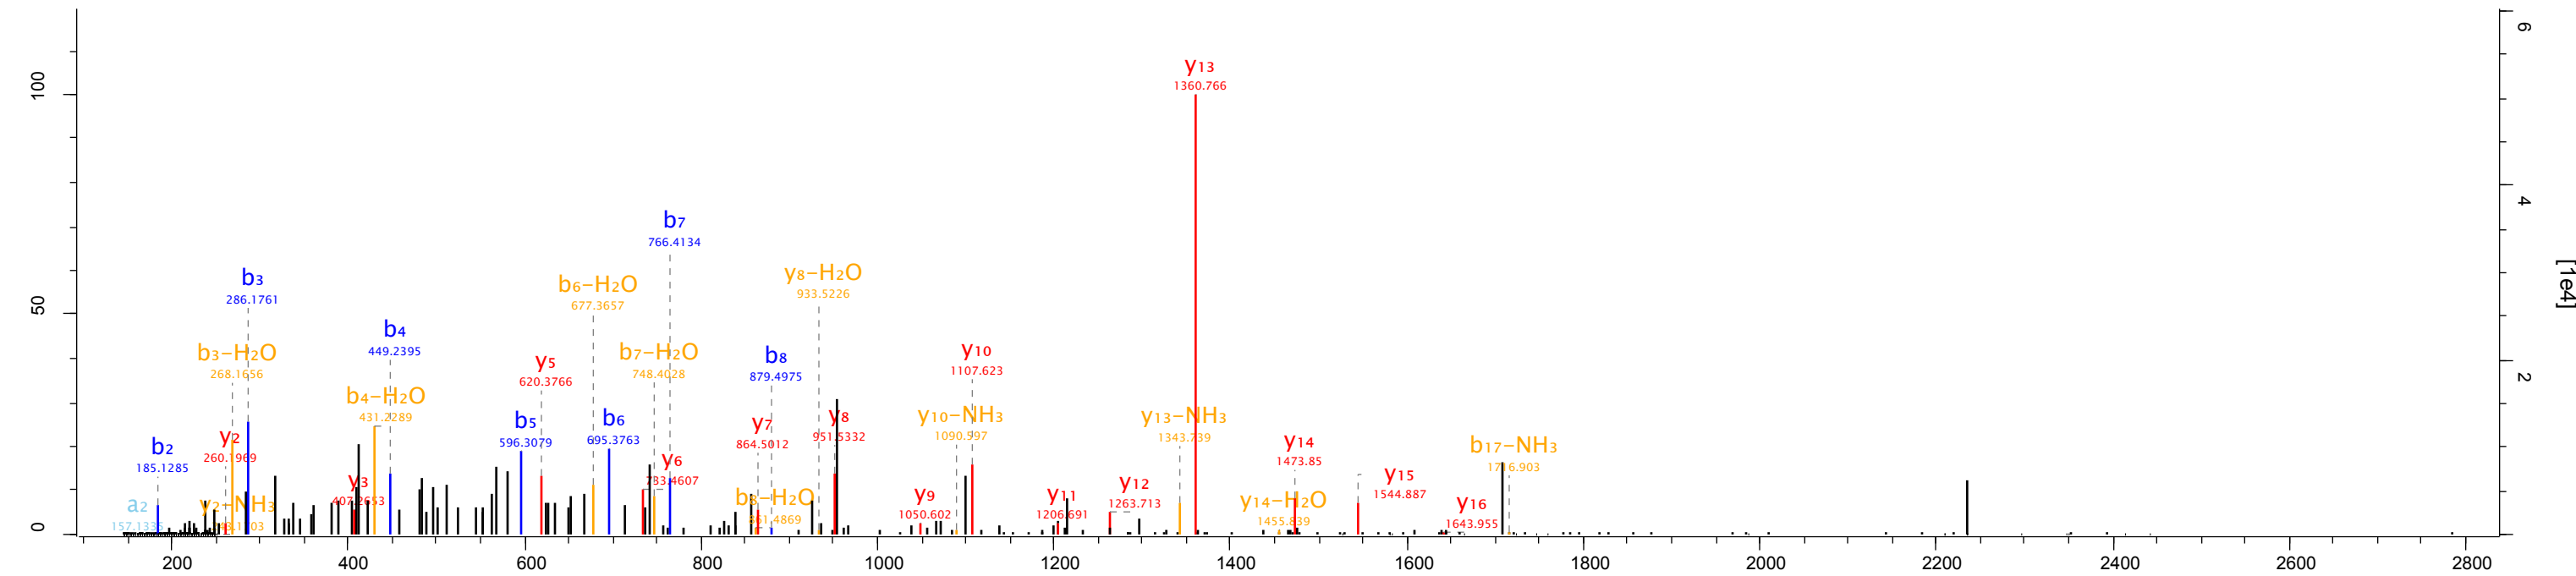

- A L T Y F V A L P G V G V S M L N V F L K -

b2 b3 b4 b5 b6 b7 b8 y16 y15 y14 y13 y12 y11 y10 y9 y8 y7 y6 y5 y3 y2

Raw file 20150307\_NSC3\_Top\_opt\_F3\_01\_1691 Scan 9876 Method TOF; CID Score 77.06 m/z 596.29 Gene names Pms2

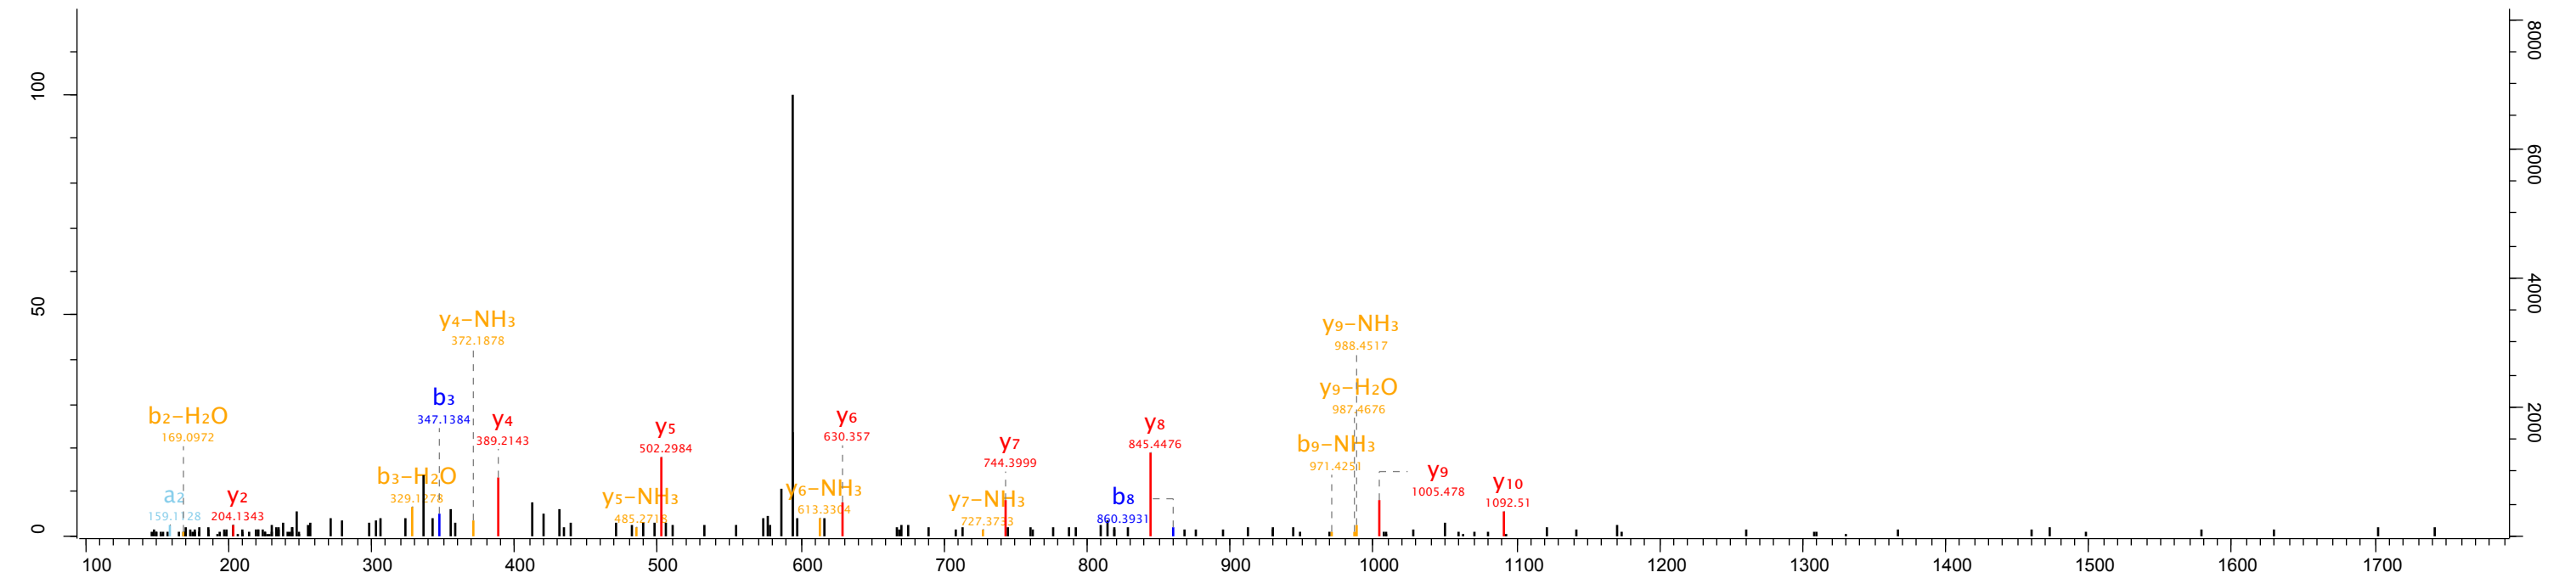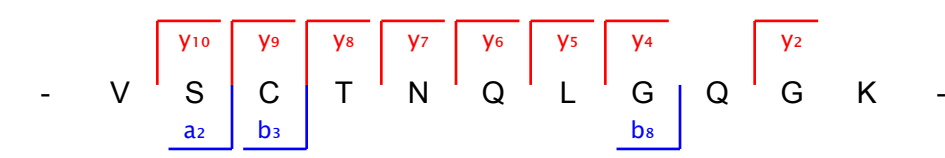

Raw file: 20150307\_NSC3\_Top\_opt\_F3\_01\_1691  
 Scan: 10794 Method: TOF; CID Score: 48.04 m/z: 440.23 Gene names: Aes

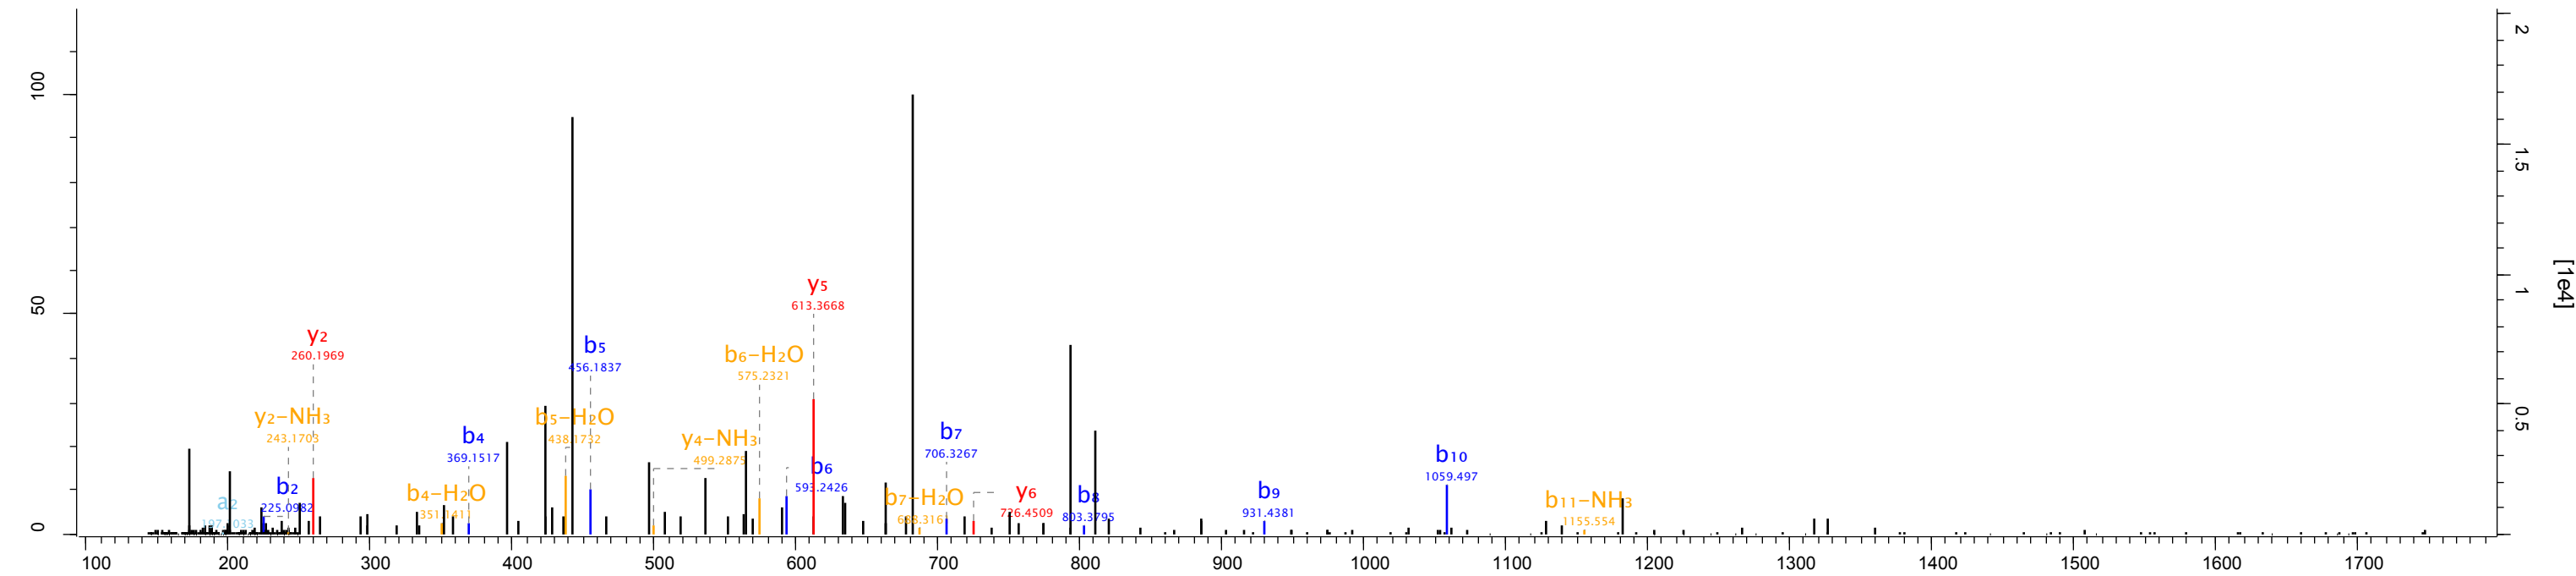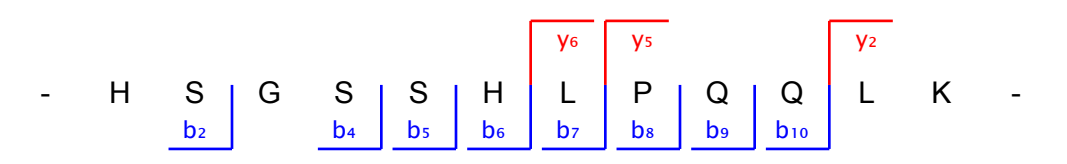

Raw file 20150307\_NSC3\_Top\_opt\_F3\_01\_1691 Scan 11972 Method TOF; CID Score 71.35 m/z 685.83 Gene names Syngr3

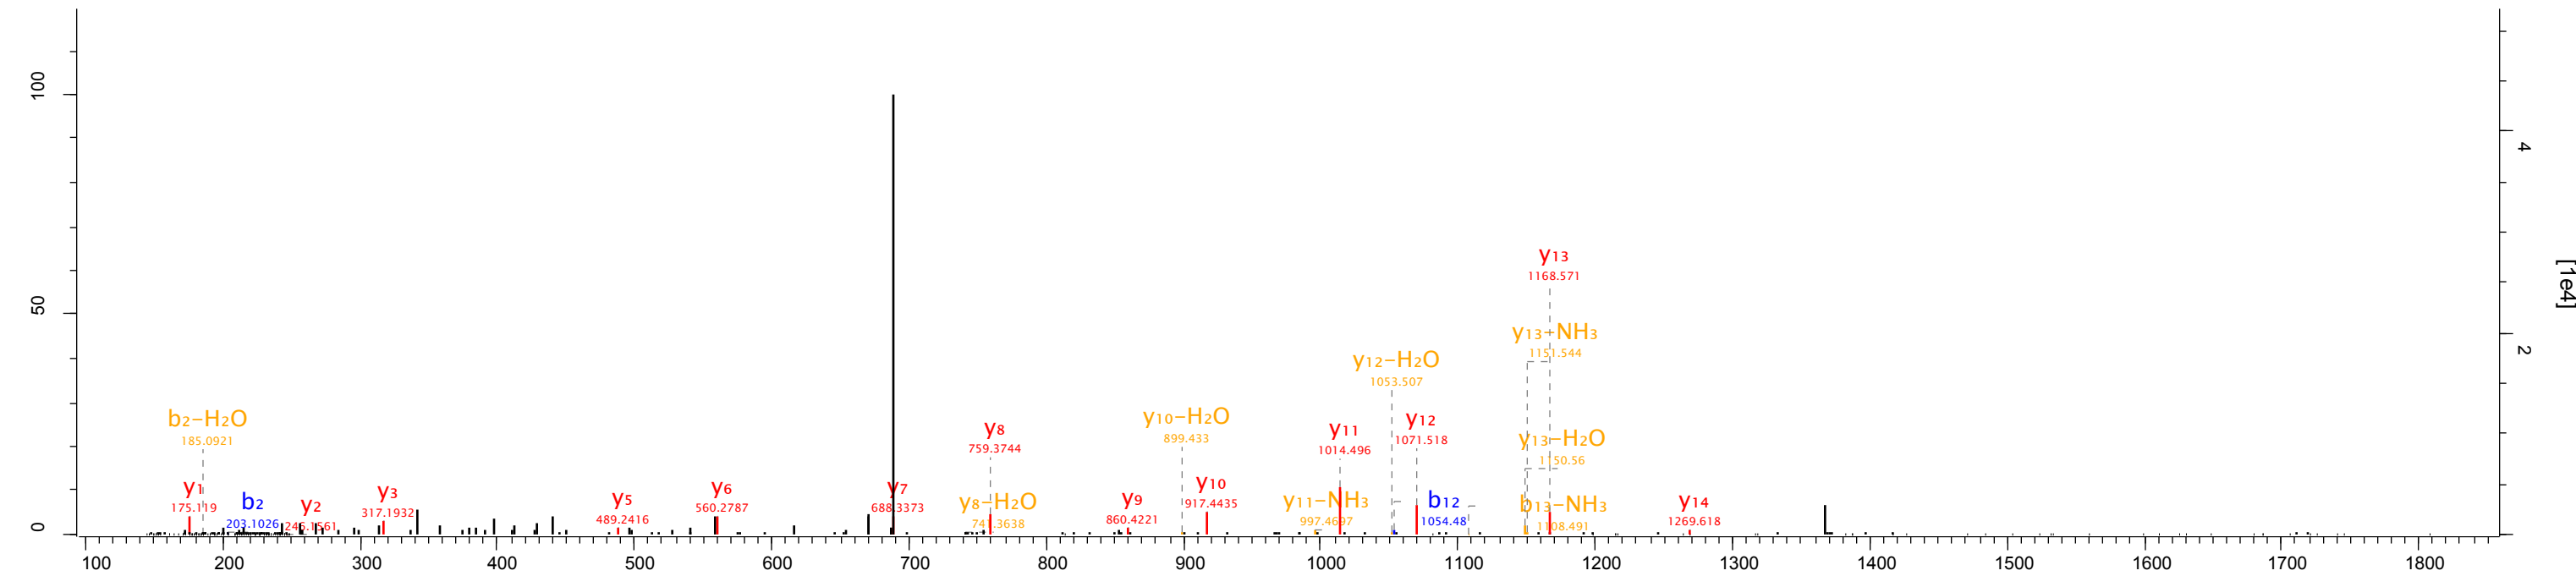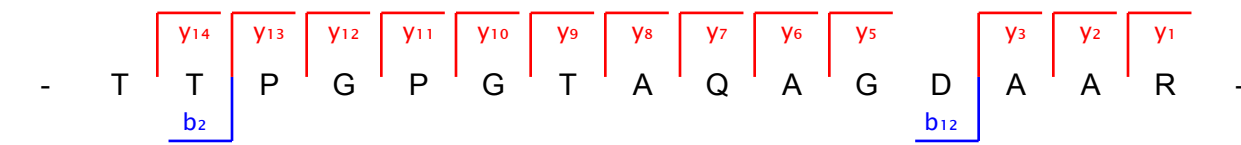

Raw file 20150307\_NSC3\_Top\_opt\_F3\_01\_1691 Scan 14993 Method TOF; CID Score 51.09 m/z 634.31 Gene names Nek3

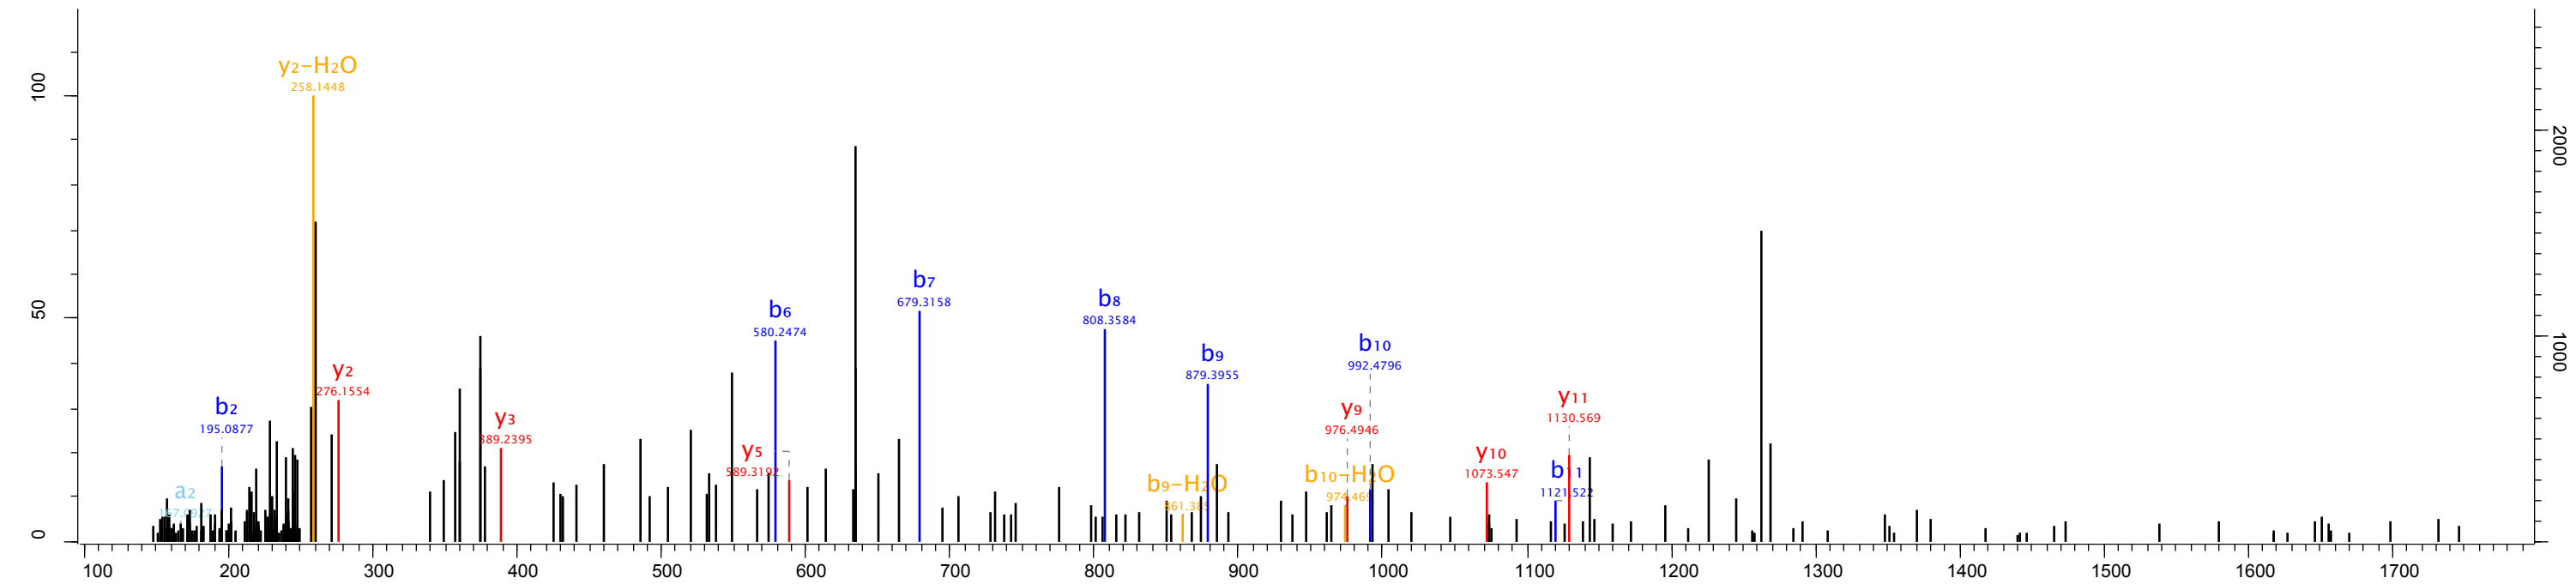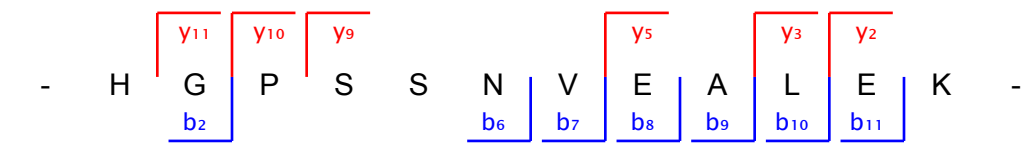

Raw file 20150307\_NSC3\_Top\_opt\_F3\_01\_1691 Scan 21400 Method TOF; CID Score 110.57 m/z 794.4 Gene names Dtd2

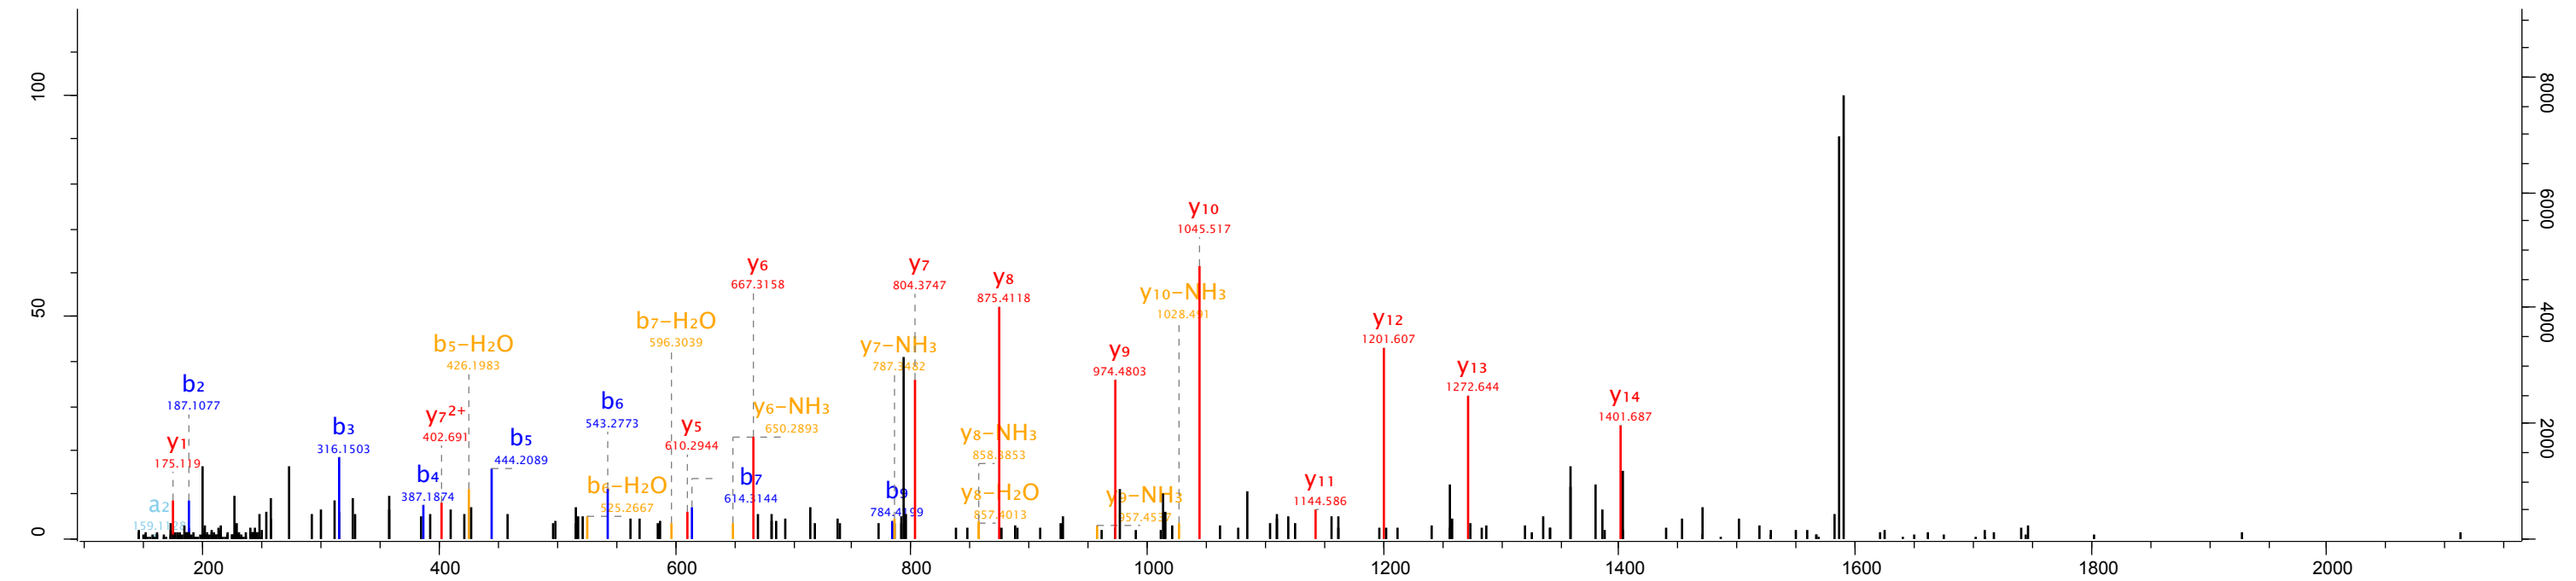

- S V E A G V A V A H G T Y G N R -

Fragmentation mapping:  
 Blue boxes (b1-b9) indicate b-ion fragments: b2 (V-E), b3 (E-A), b4 (A-G), b5 (G-V), b6 (V-A), b7 (A-V), b9 (A-H).  
 Red boxes (y1-y14) indicate y-ion fragments: y1 (R), y5 (T-G), y6 (G-H), y7 (H-A), y8 (A-V), y9 (V-A), y10 (A-G), y11 (G-V), y12 (V-A), y13 (A-G), y14 (E-A).

Raw file  
20150307\_NSC3\_Top\_opt\_F3\_01\_1691

Scan 25670 Method TOF; CID Score 54.51 m/z 675.34 Gene names Zgpat

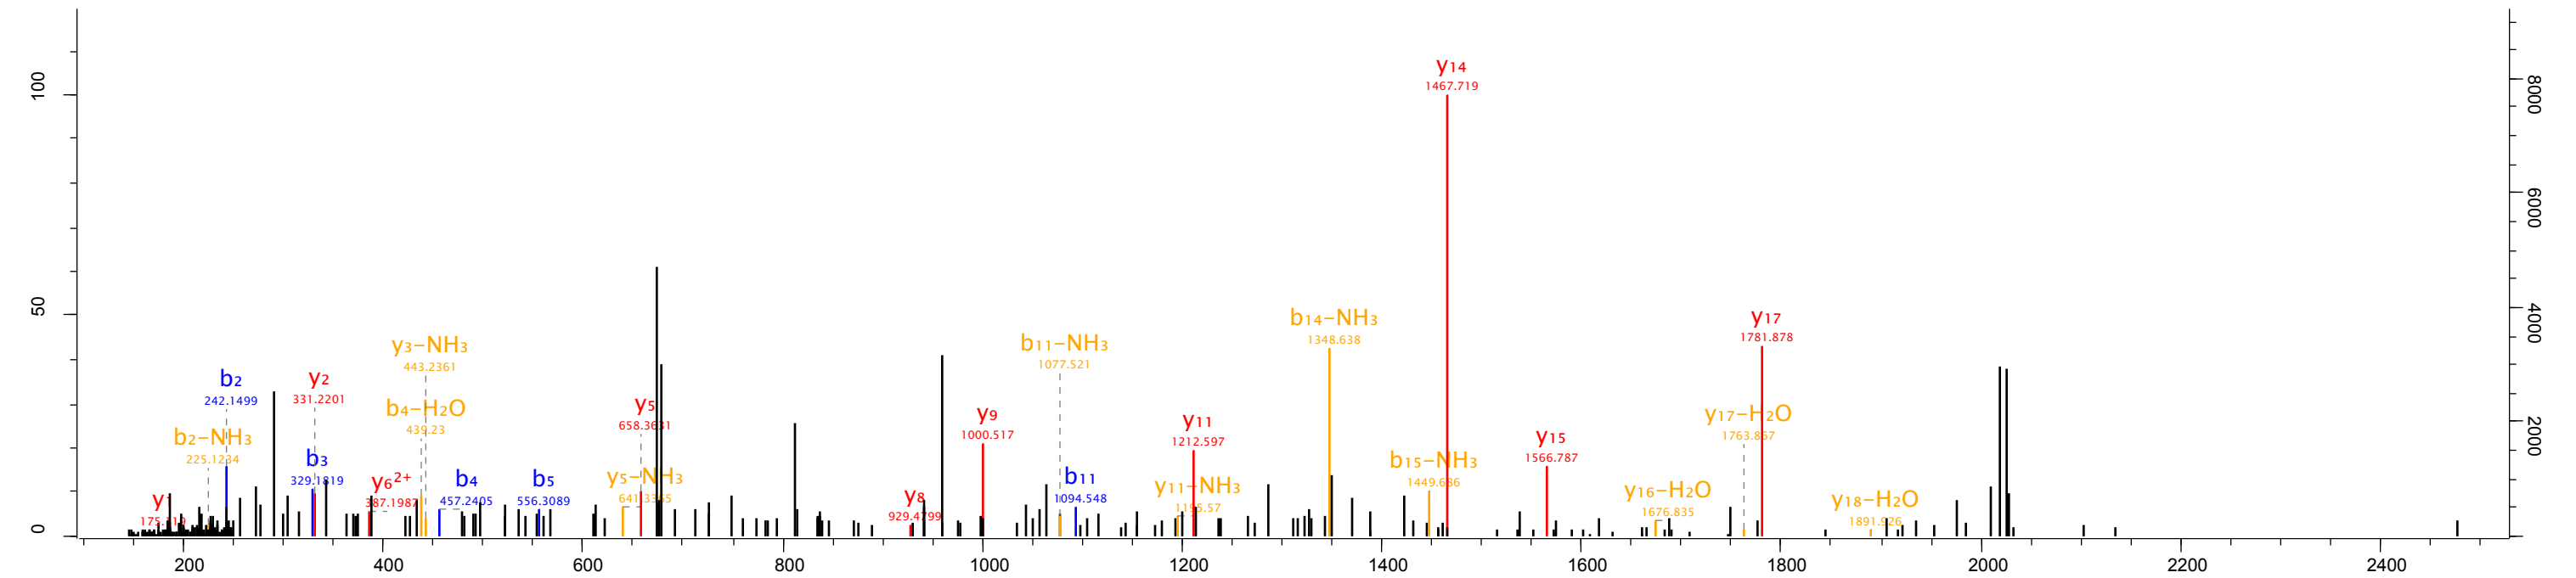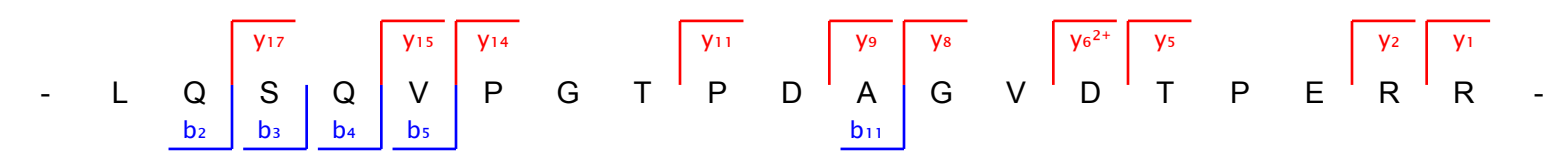

Raw file  
20150307\_NSC3\_Top\_opt\_F3\_01\_1691

Scan 40929 Method TOF; CID Score 47.09 m/z 685.32 Gene names Pcp4;Igsf5

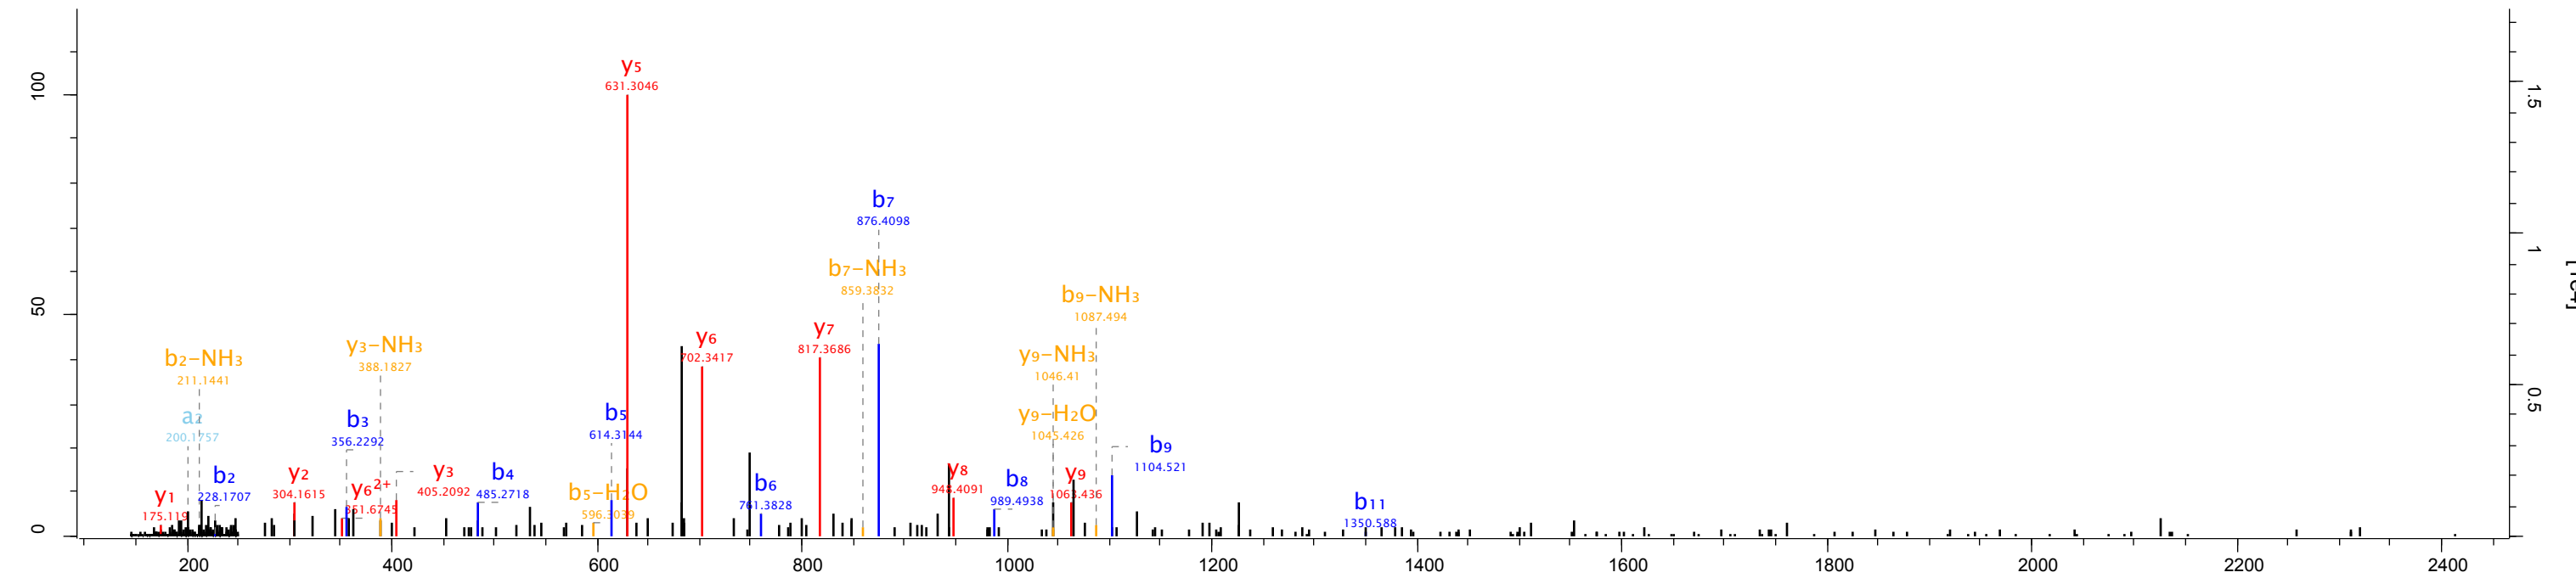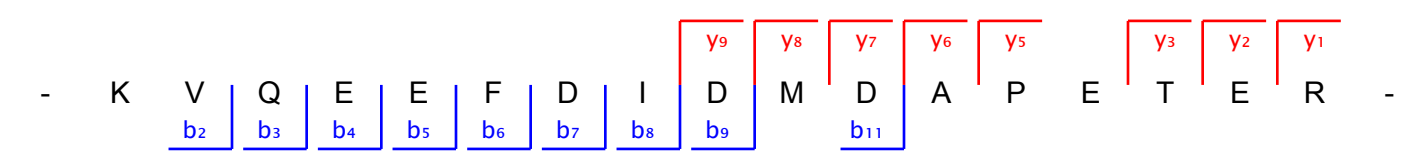



Raw file 20150307\_NSC3\_Top\_opt\_F3\_01\_1691 Scan 47062 Method TOF; CID Score 45 m/z 921.98 Gene names Stab2

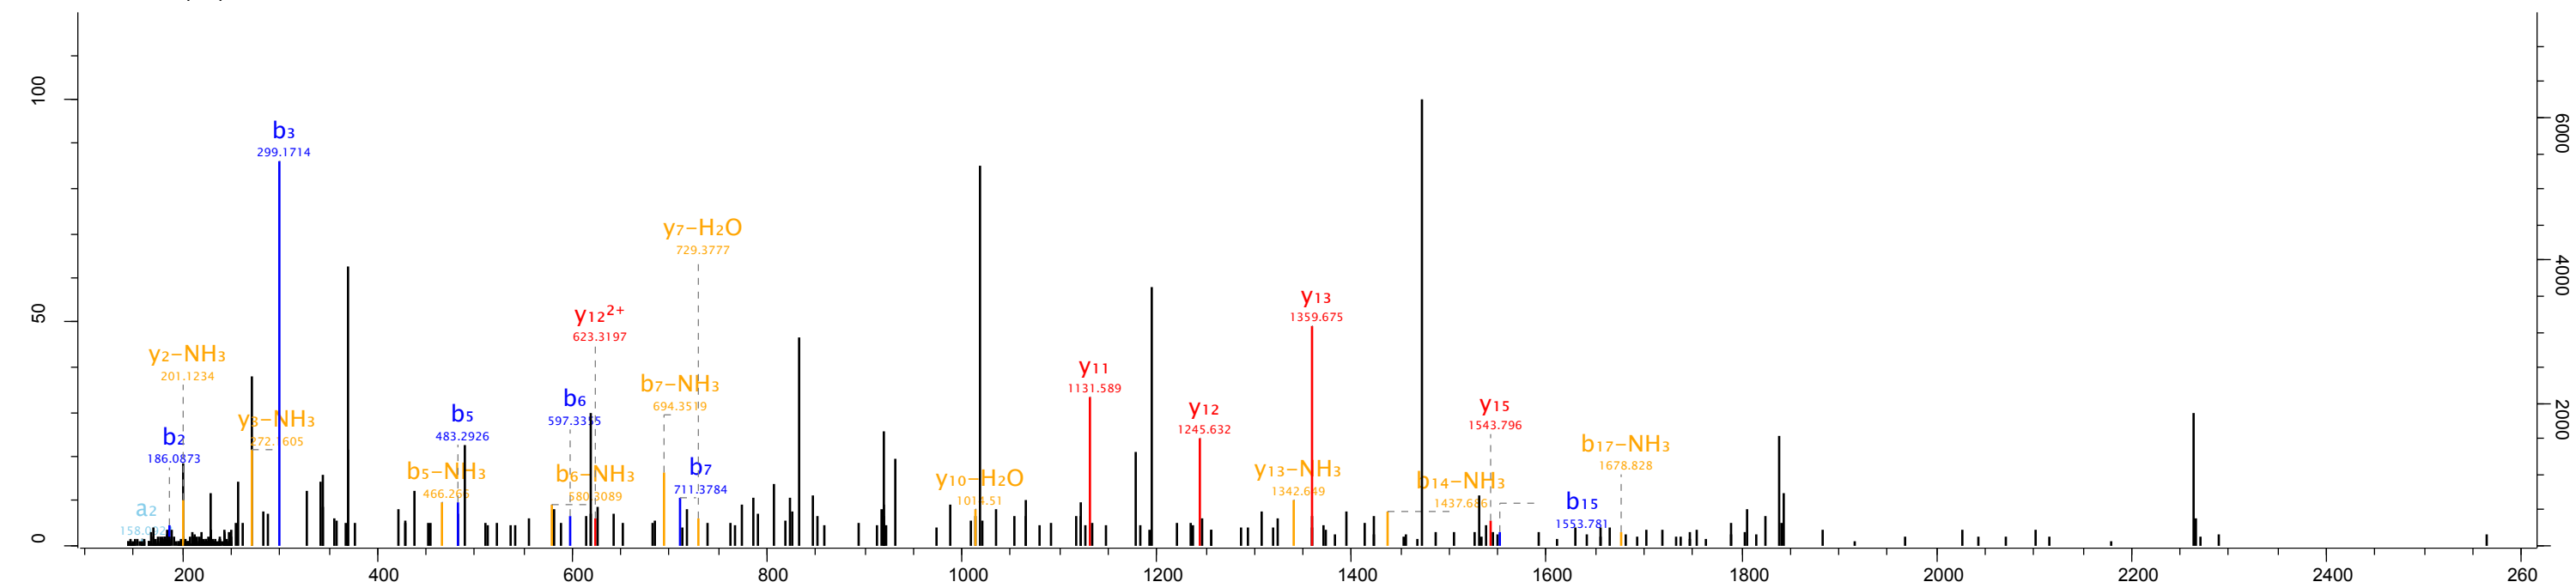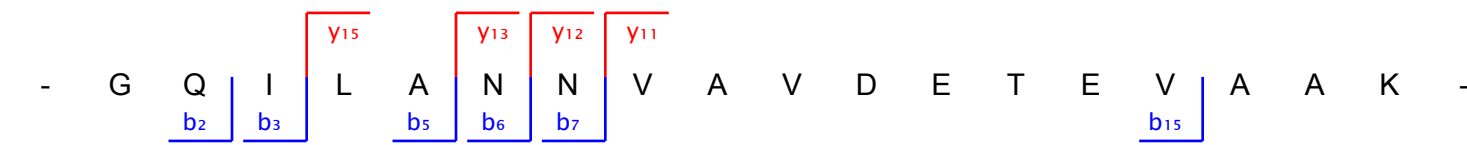

Raw file  
20150307\_NSC3\_Top\_opt\_F3\_01\_1691

Scan 48875 Method TOF; CID Score 117.79 m/z 700.85 Gene names Spcs1

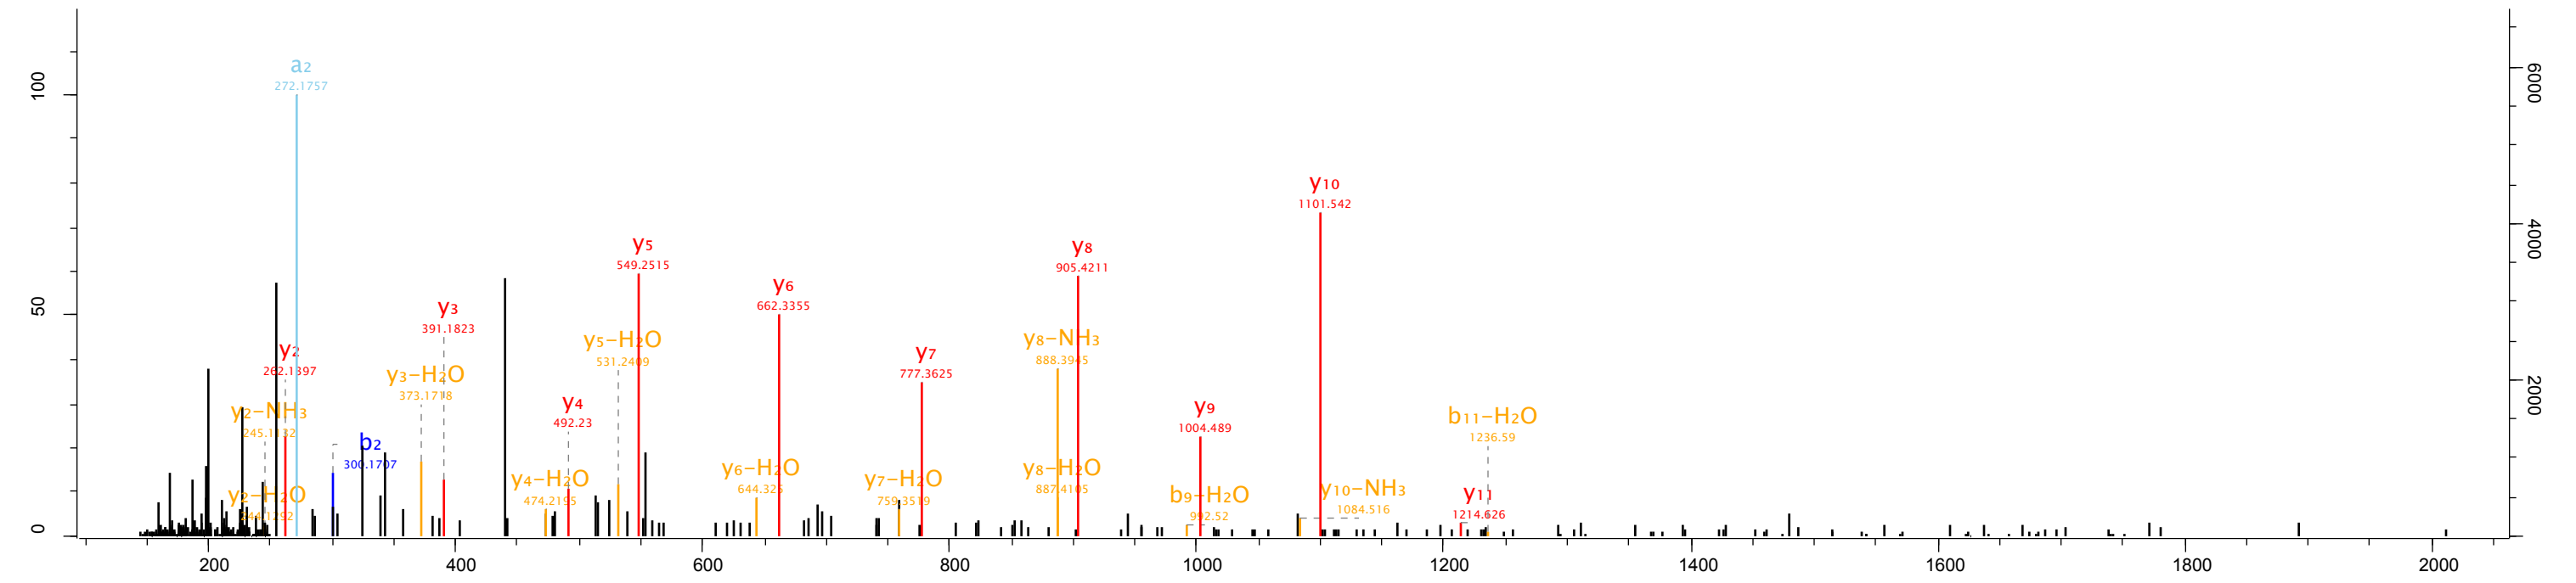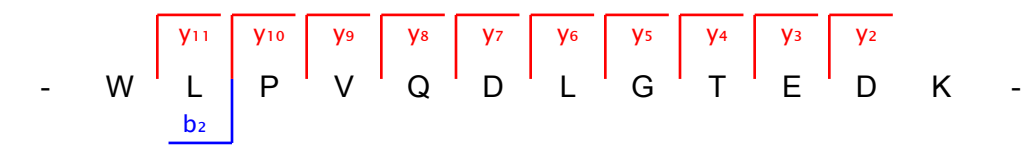

Raw file 20150307\_NSC3\_Top\_opt\_F3\_01\_1691 Scan 56151 Method TOF; CID Score 65.18 m/z 652.36 Gene names Glrx

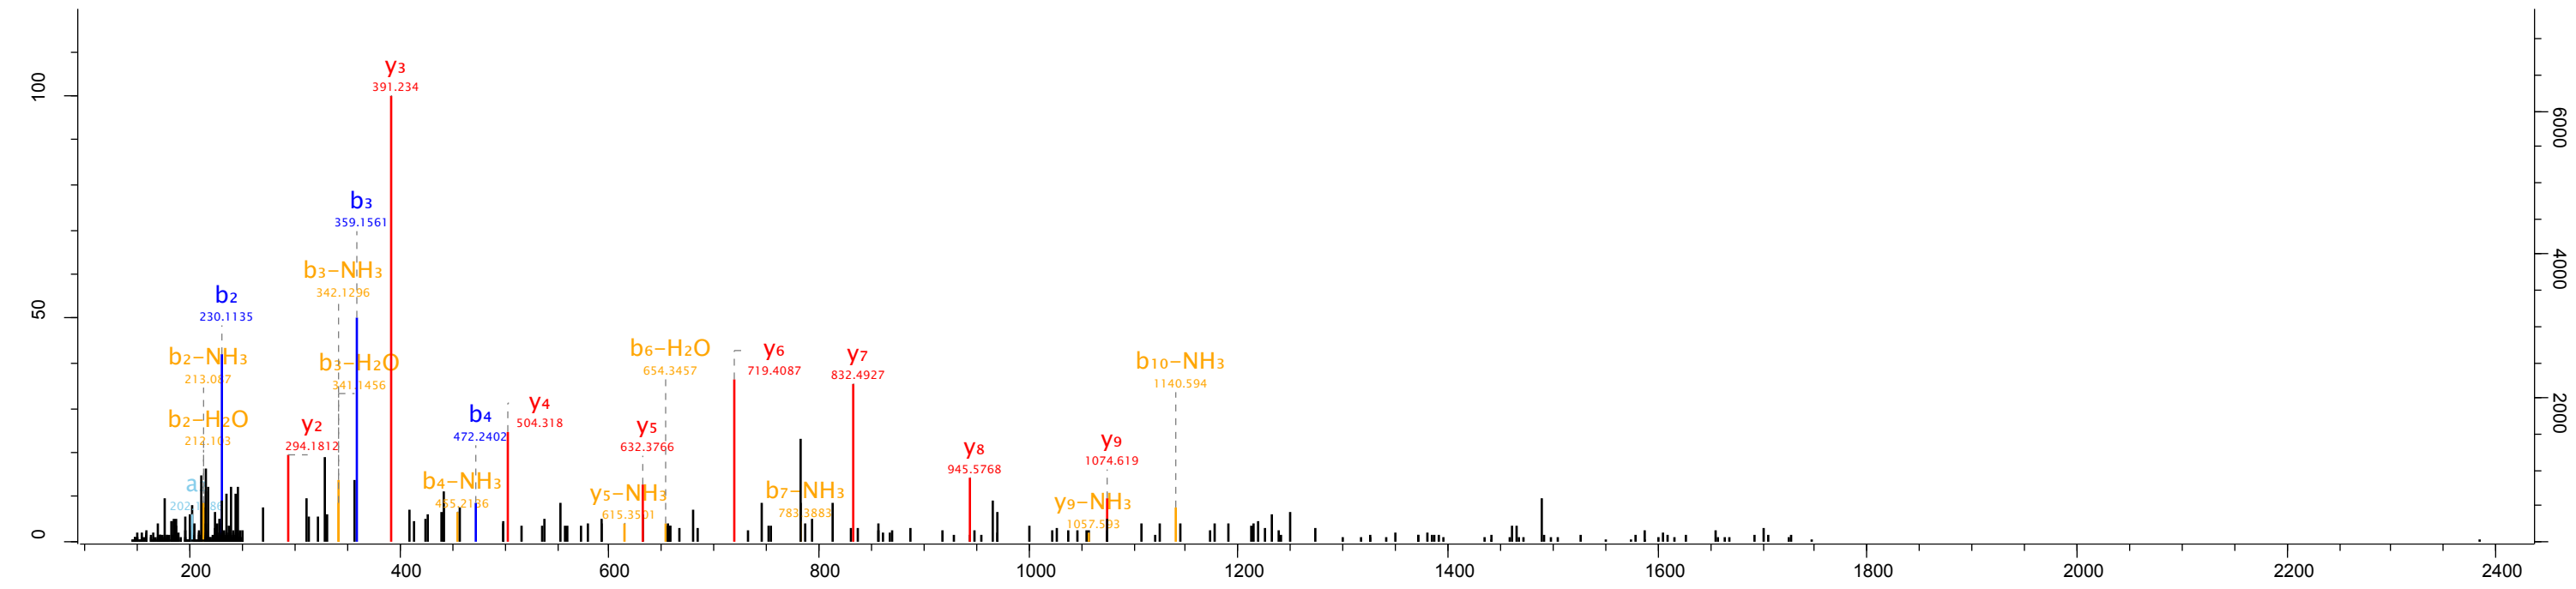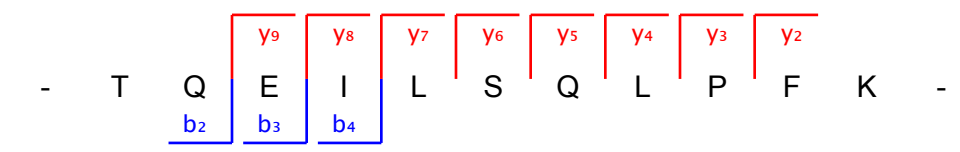

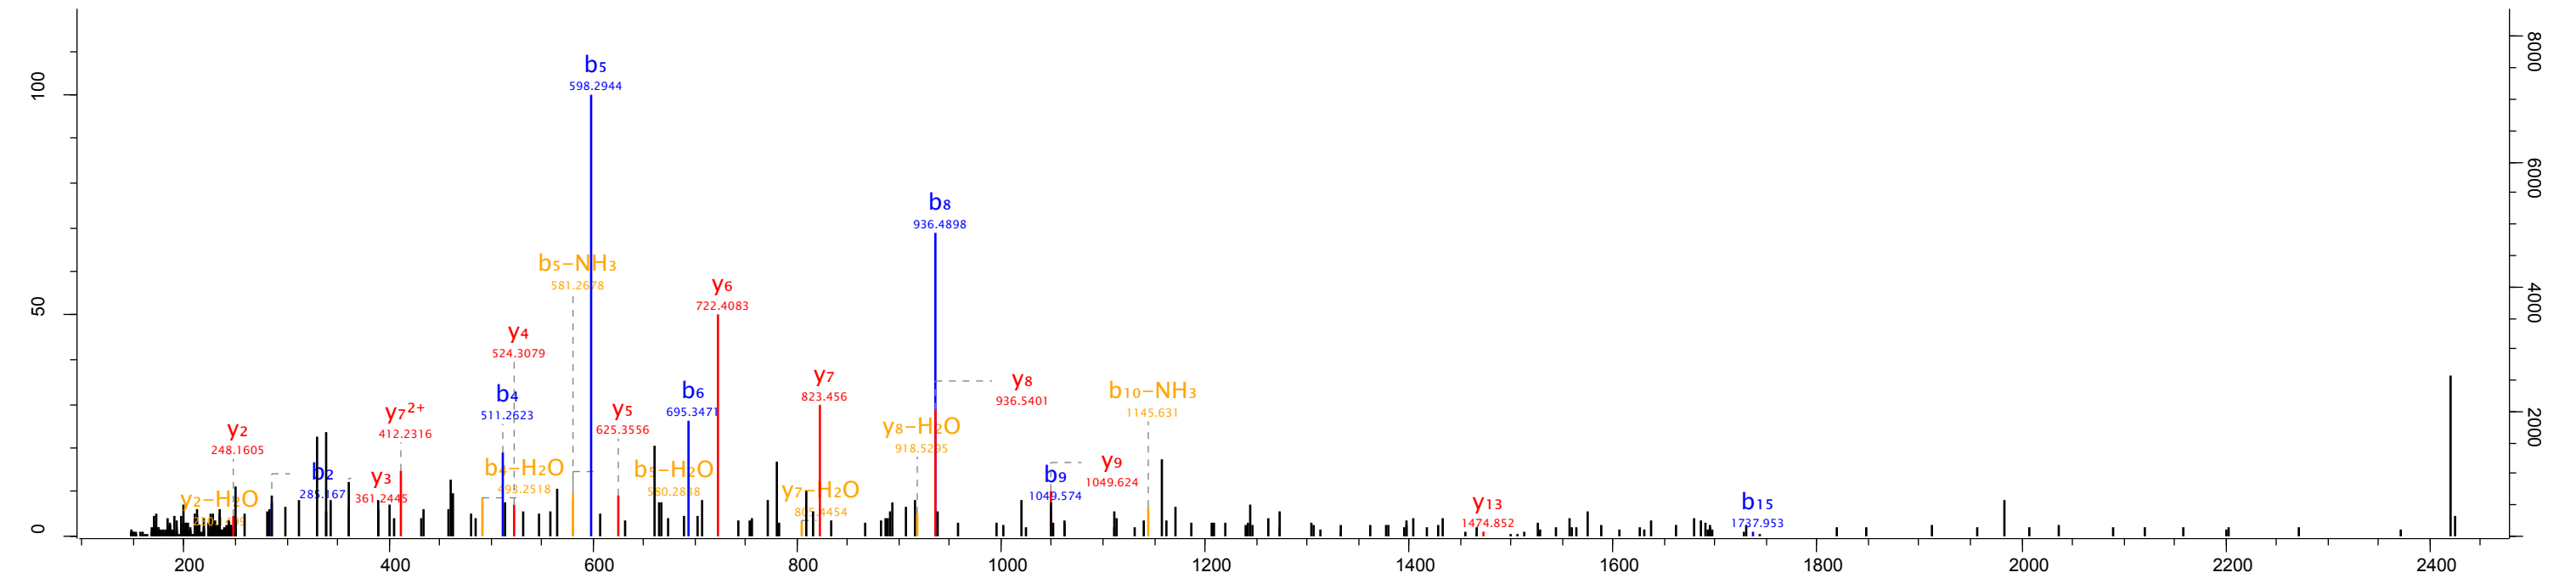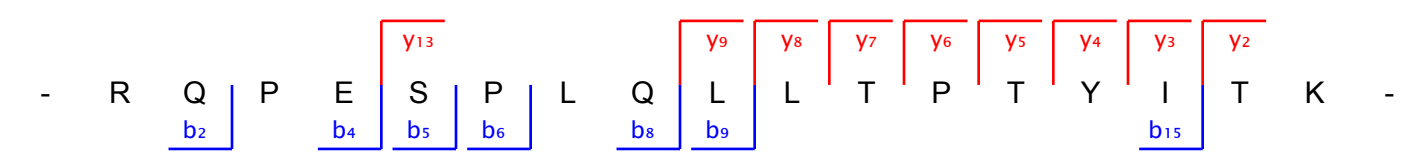

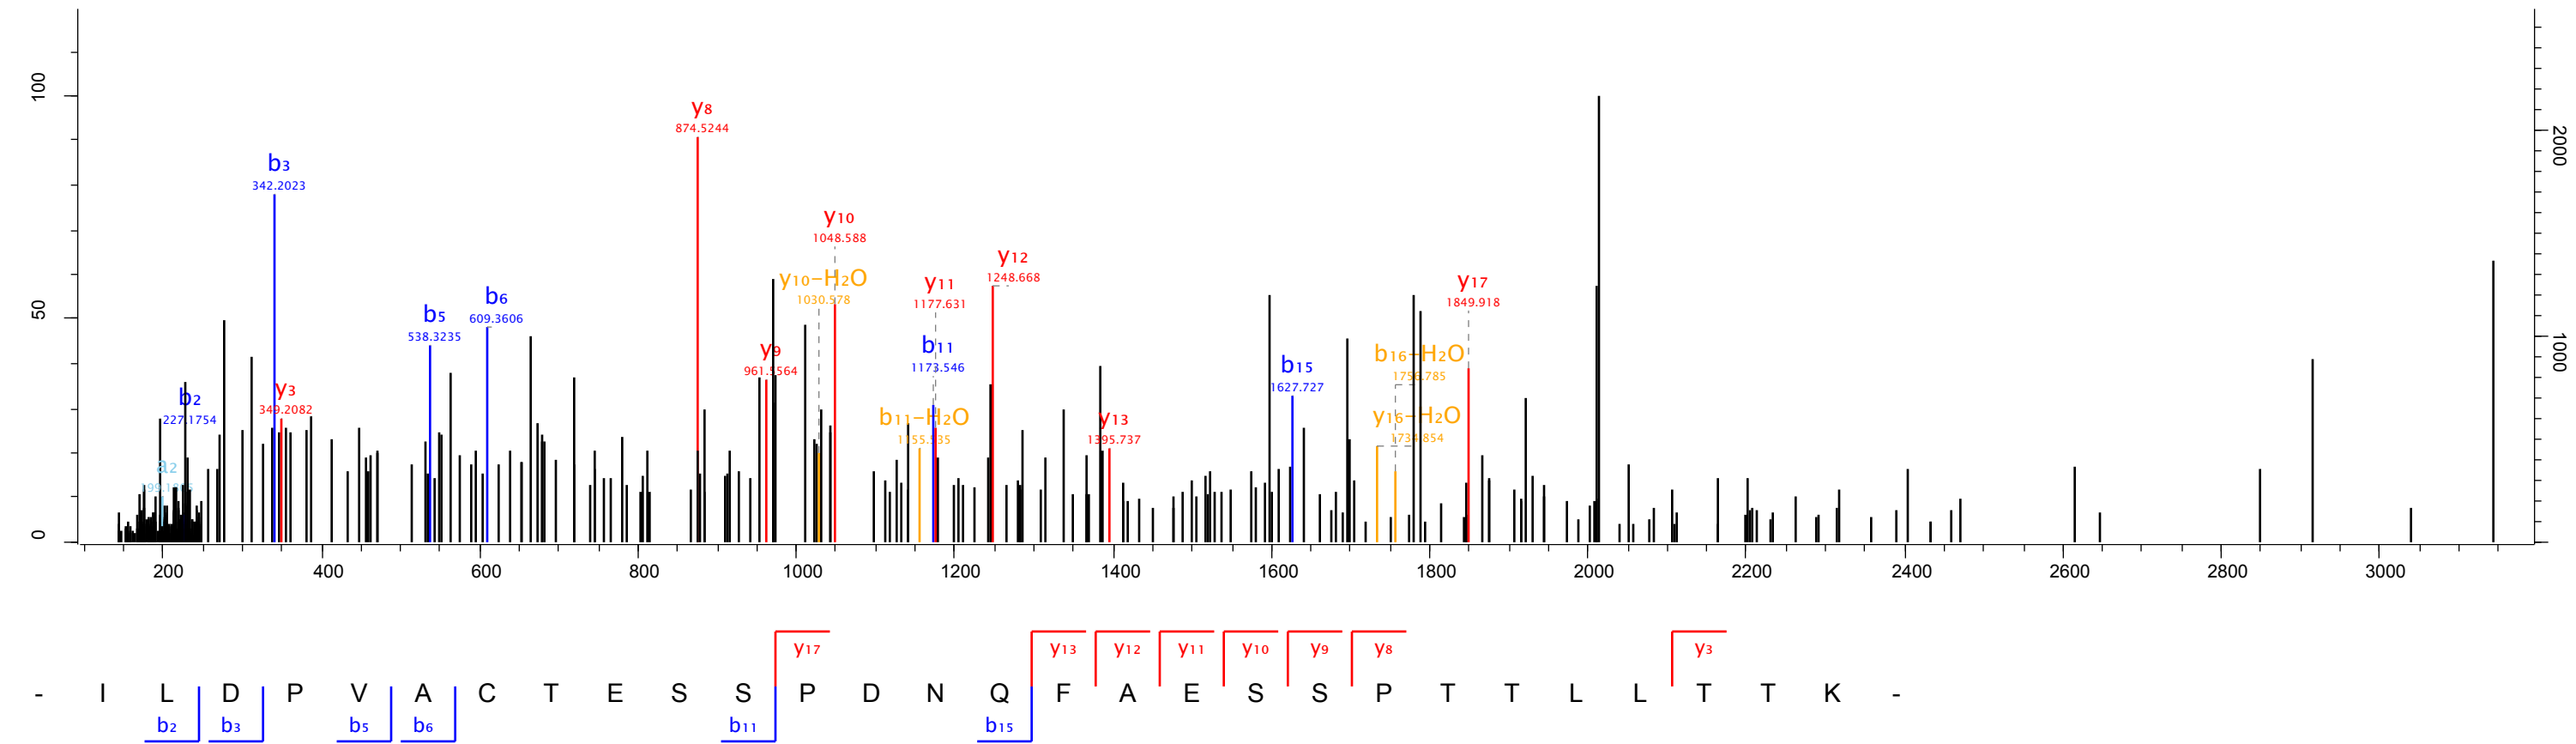

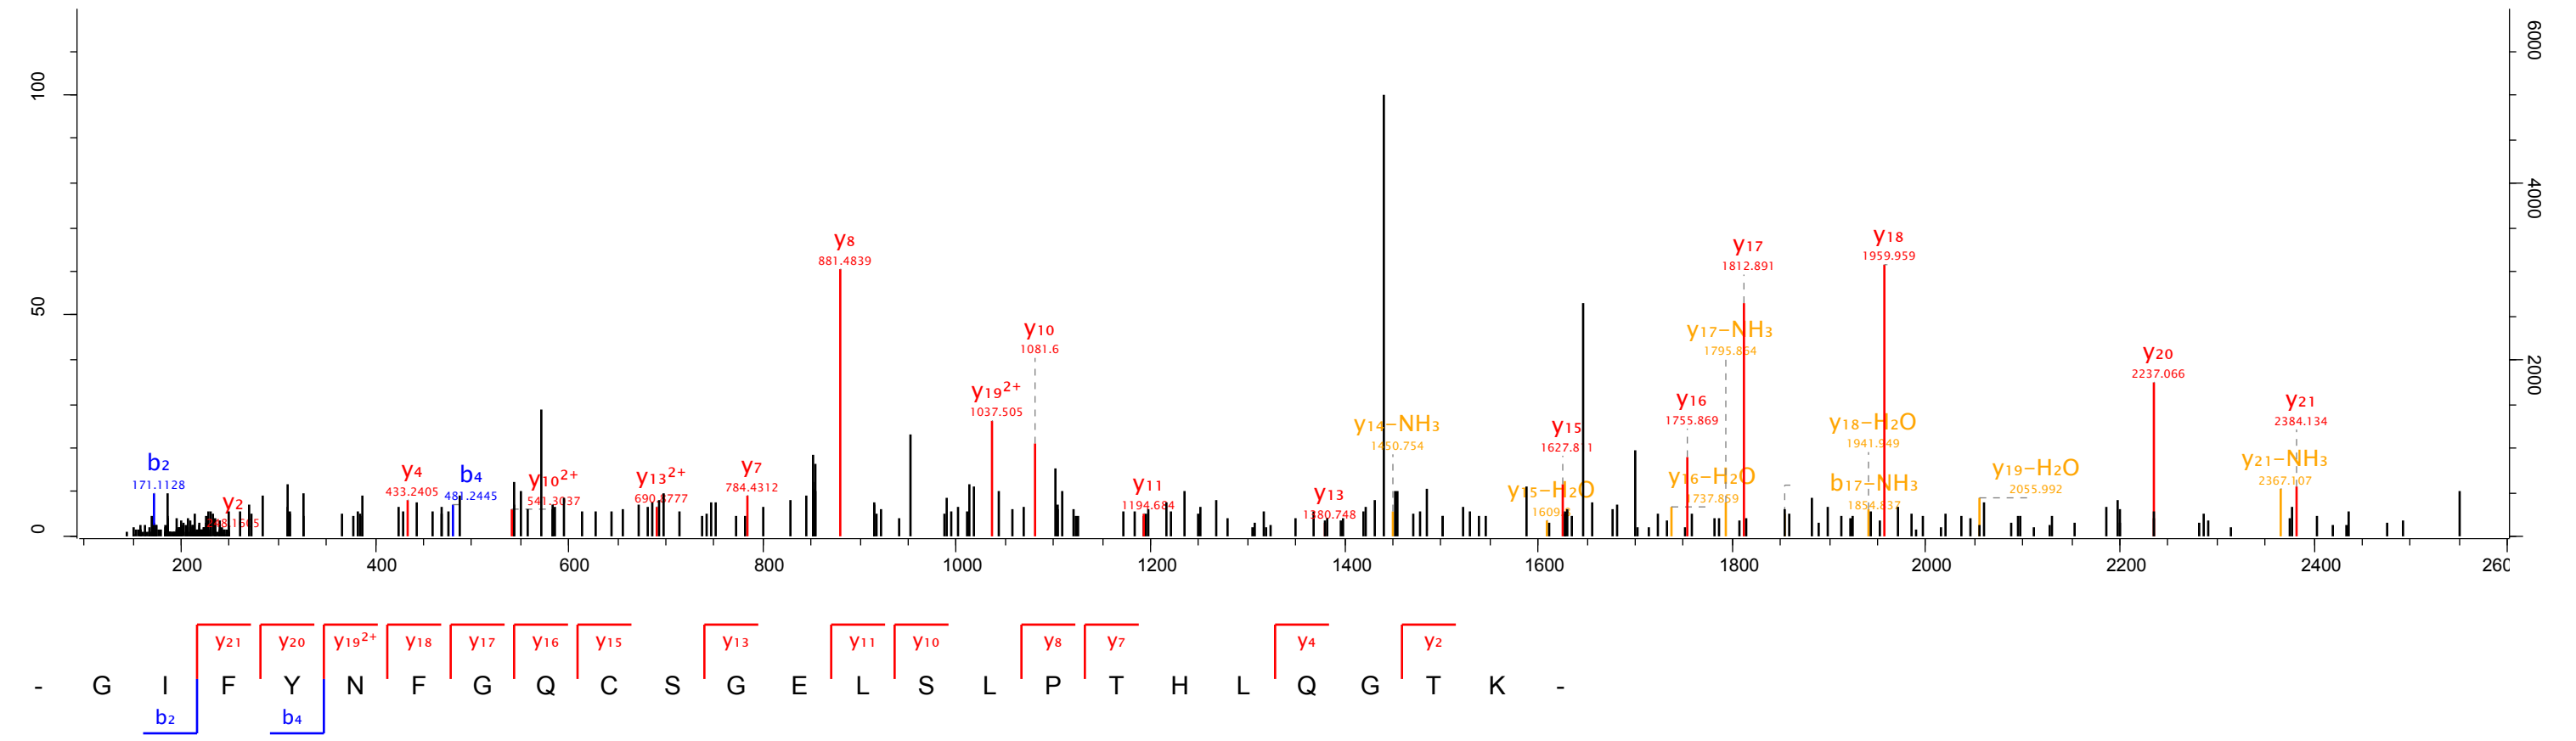

Raw file  
20150307\_NSC3\_Top\_opt\_F3\_01\_1691

Scan 62835 Method TOF; CID Score 73.92 m/z 923.45 Gene names Naaa

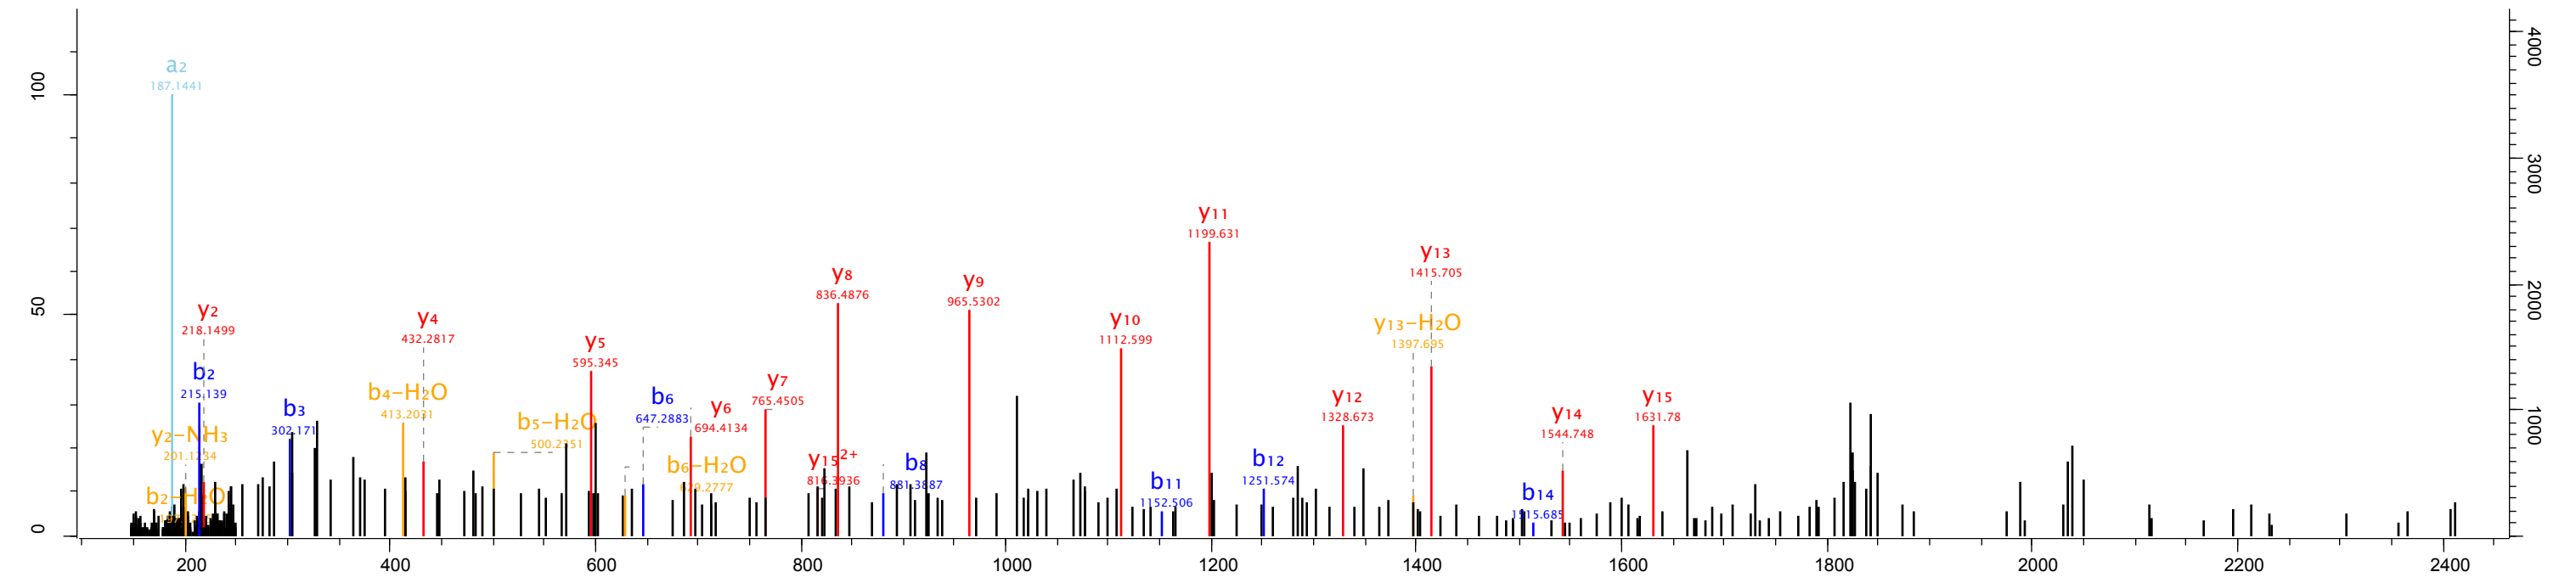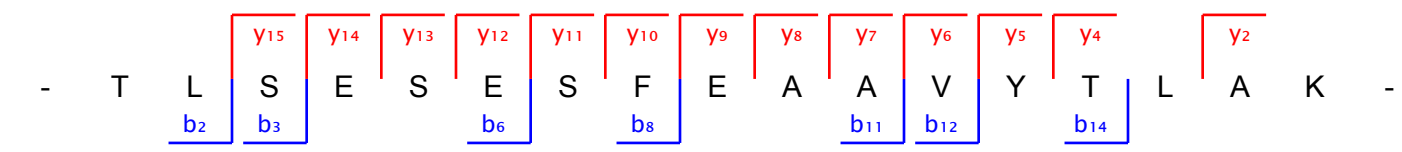

Raw file  
20150307\_NSC3\_Top\_opt\_F3\_01\_1691

Scan 63973 Method TOF; CID Score 47.59 m/z 1121.9 Gene names Zeb1

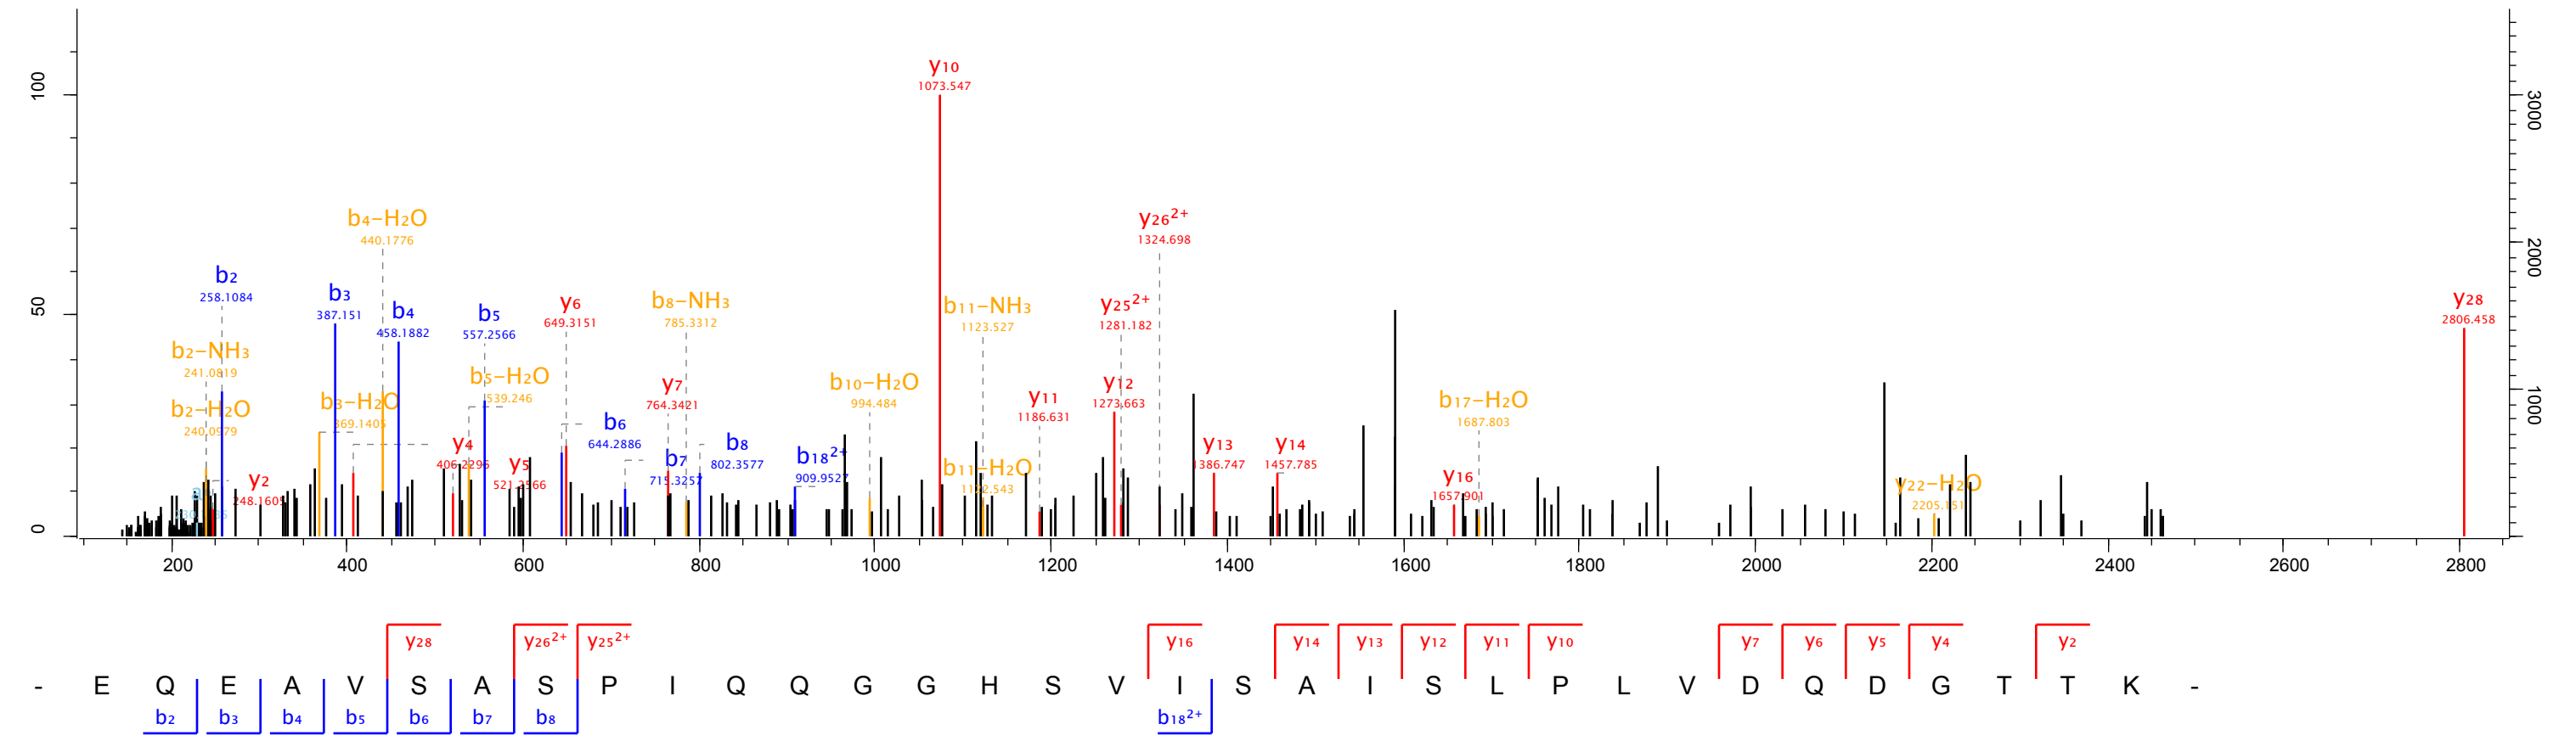



Raw file 20150307\_NSC3\_Top\_opt\_F3\_01\_1691 Scan 65141 Method TOF; CID Score 51.09 m/z 961.48 Gene names Dus4l

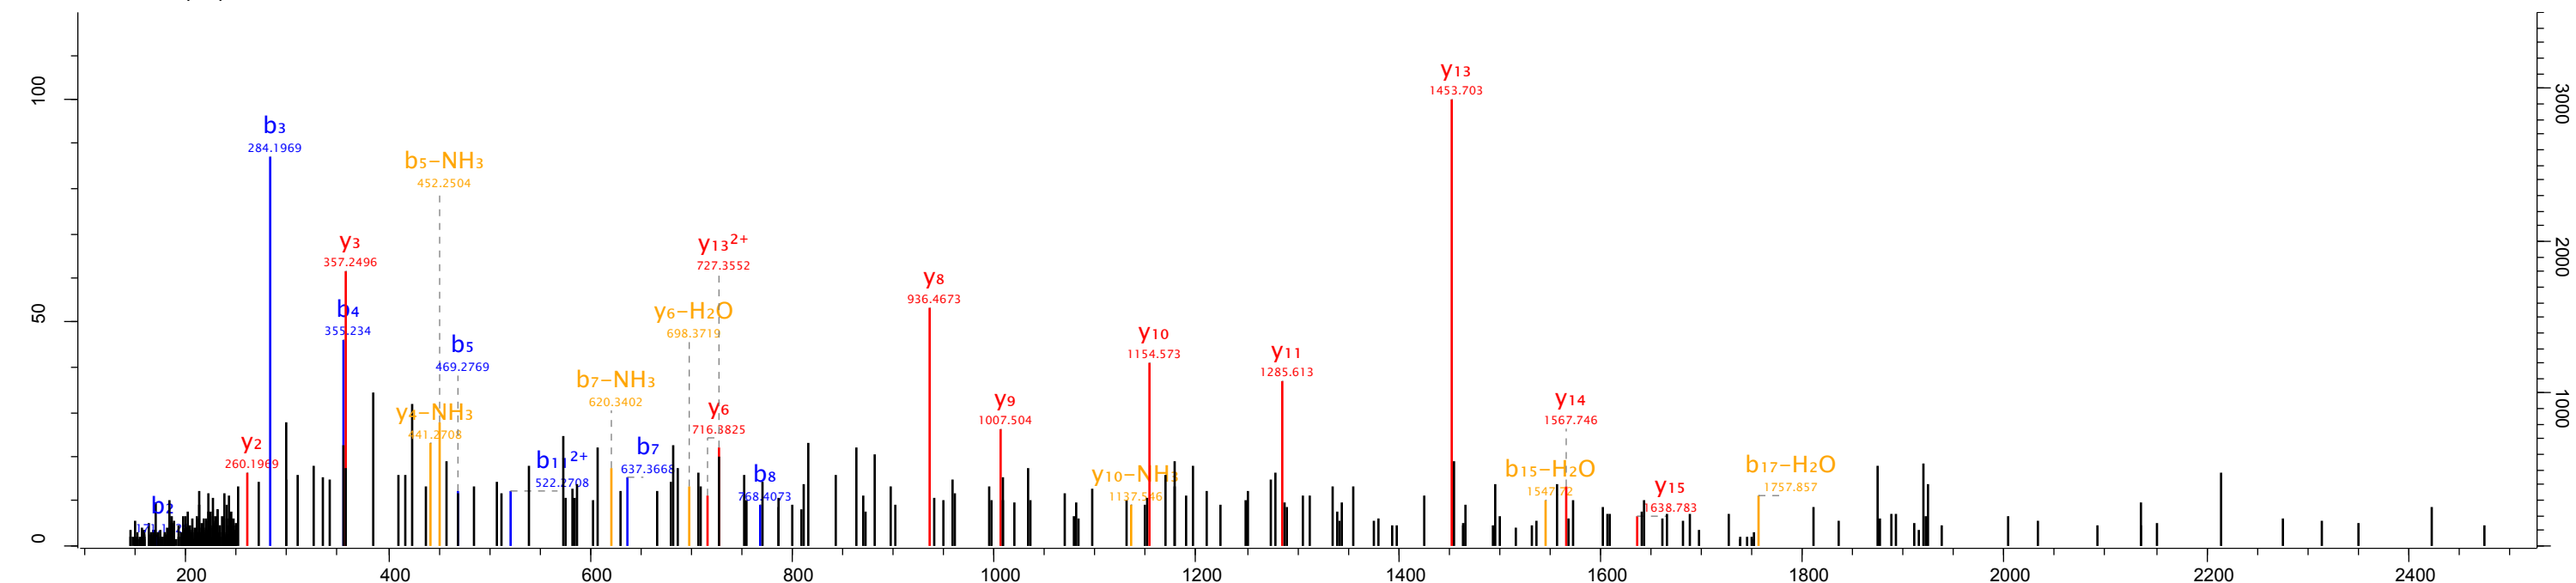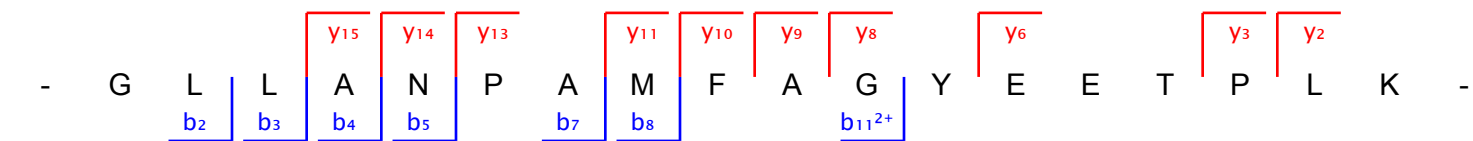

Raw file  
20150307\_NSC3\_Top\_opt\_F3\_01\_1691

Scan 65496 Method TOF; CID Score 90.91 m/z 559.33 Gene names Trim23

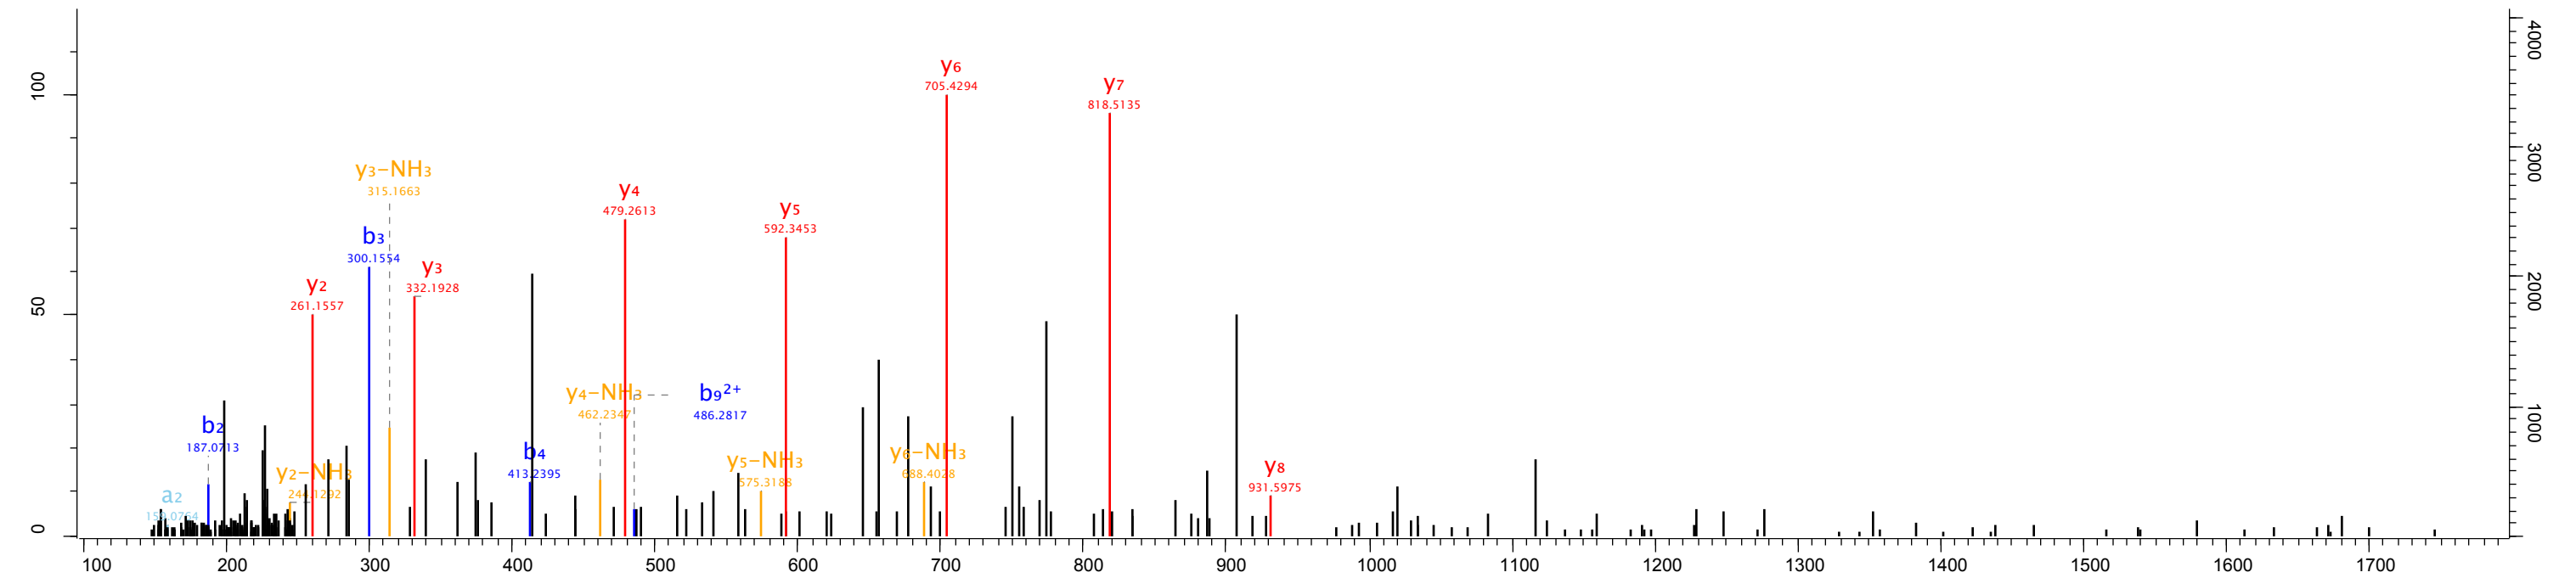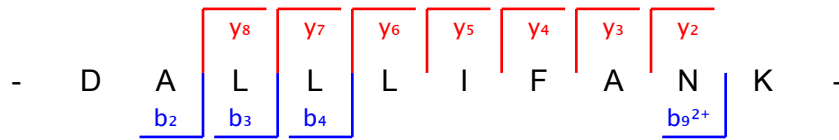

Raw file  
20150307\_NSC3\_Top\_opt\_F3\_01\_1691

Scan 67746 Method TOF; CID Score 53.03 m/z 958.03 Gene names Cbr4

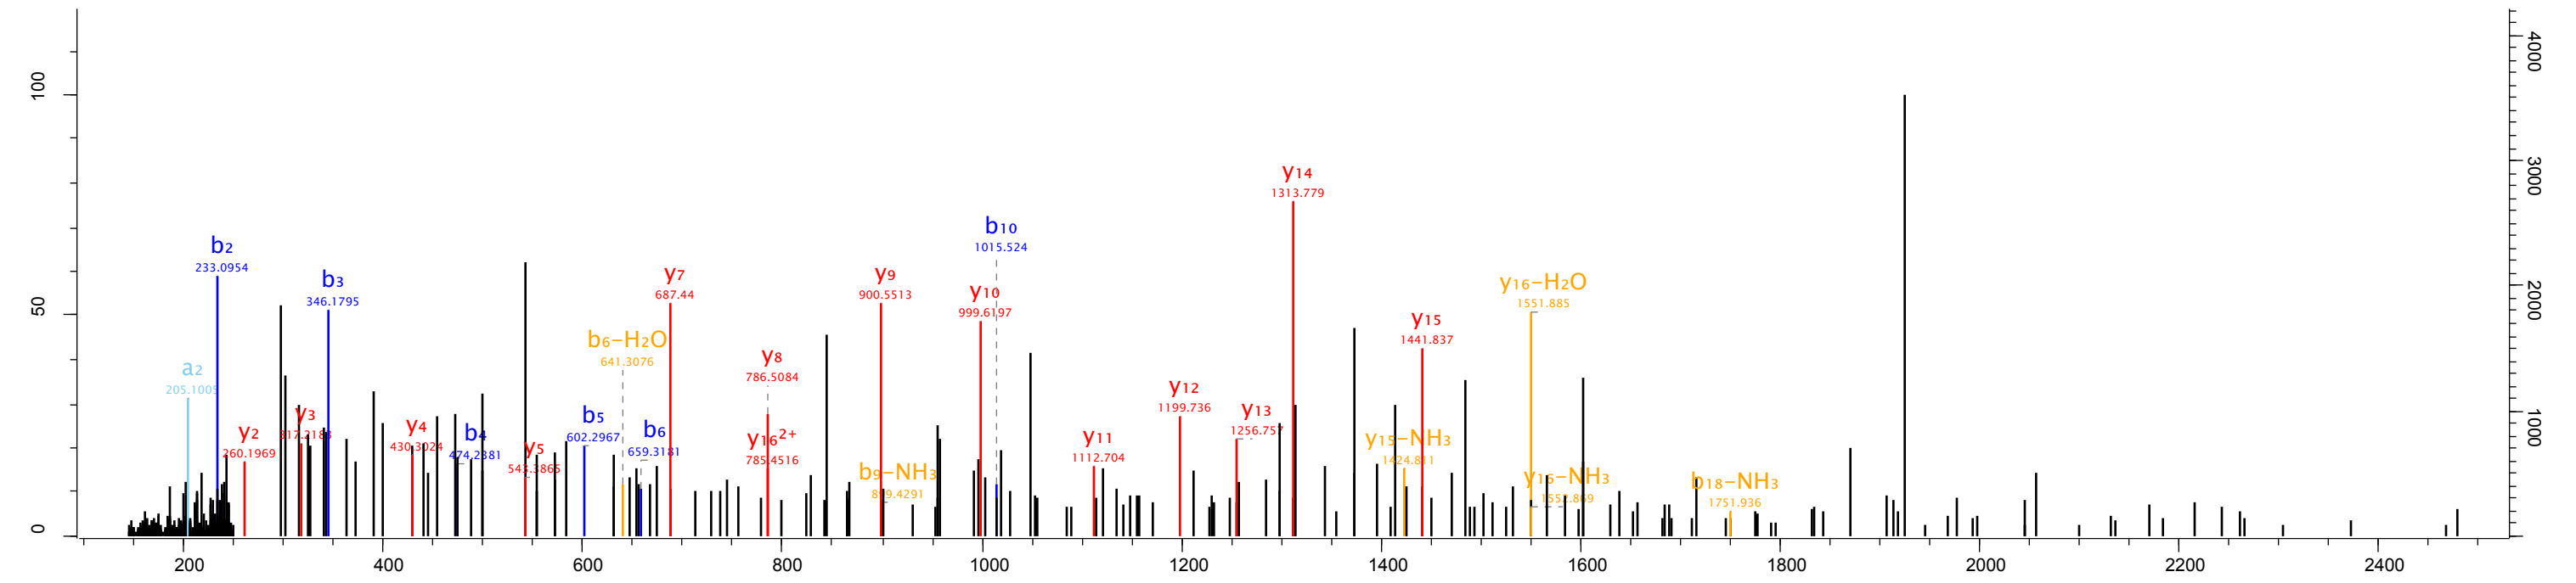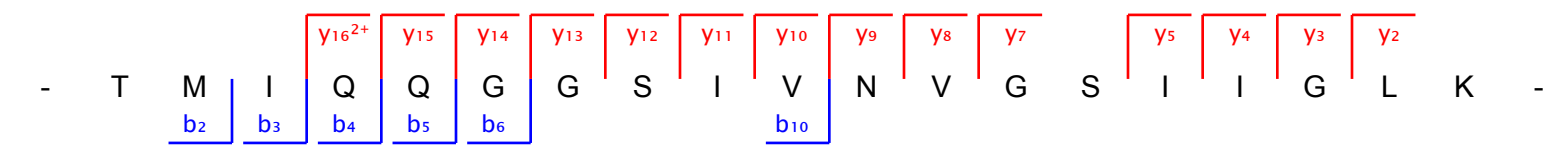

Raw file 20150307\_NSC3\_Top\_opt\_F3\_01\_1691 Scan 67877 Method TOF; CID Score 53.89 m/z 1064.49 Gene names Agtrap

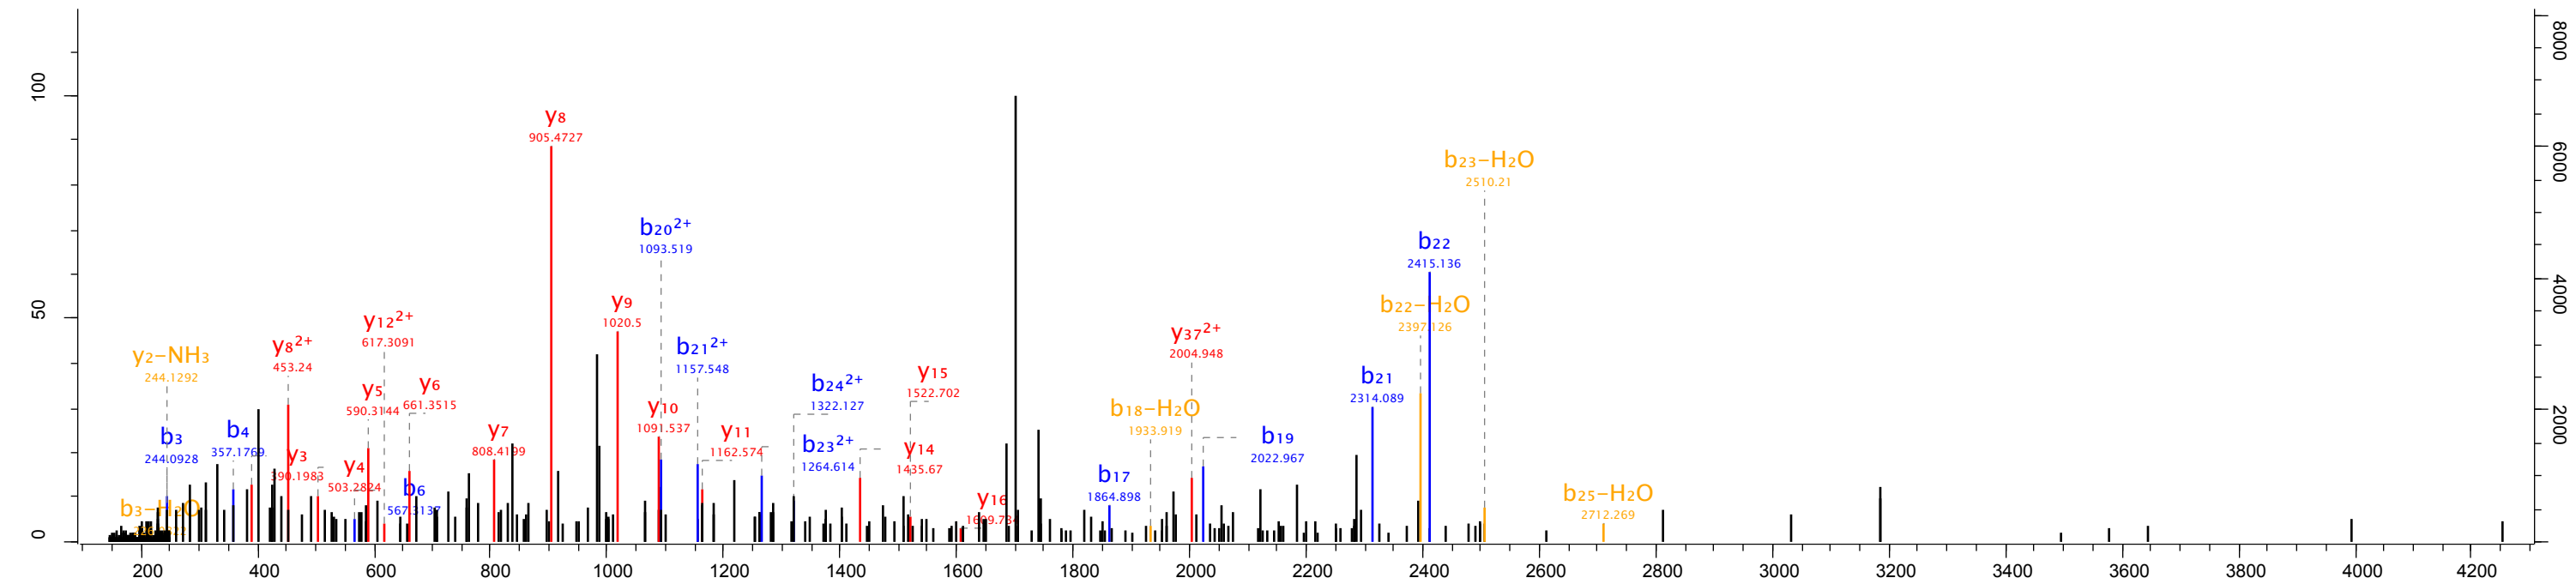

- G G E L P L R P D F F G P S Q E H S A Y Q T I D S S S D A A A D P F A S L E

b<sub>3</sub> b<sub>4</sub> b<sub>6</sub> b<sub>17</sub> b<sub>19</sub> b<sub>20</sub><sup>2+</sup> b<sub>21</sub> b<sub>22</sub> b<sub>23</sub><sup>2+</sup> b<sub>24</sub><sup>2+</sup> y<sub>3</sub> y<sub>4</sub> y<sub>5</sub> y<sub>6</sub> y<sub>7</sub> y<sub>8</sub> y<sub>9</sub> y<sub>10</sub> y<sub>11</sub> y<sub>12</sub><sup>2+</sup> y<sub>14</sub> y<sub>15</sub> y<sub>16</sub>

N K -

Raw file  
20150307\_NSC3\_Top\_opt\_F3\_01\_1691

Scan: 70975  
Method: TOF; CID  
Score: 52.46  
m/z: 743.4  
Gene names: Mzt2

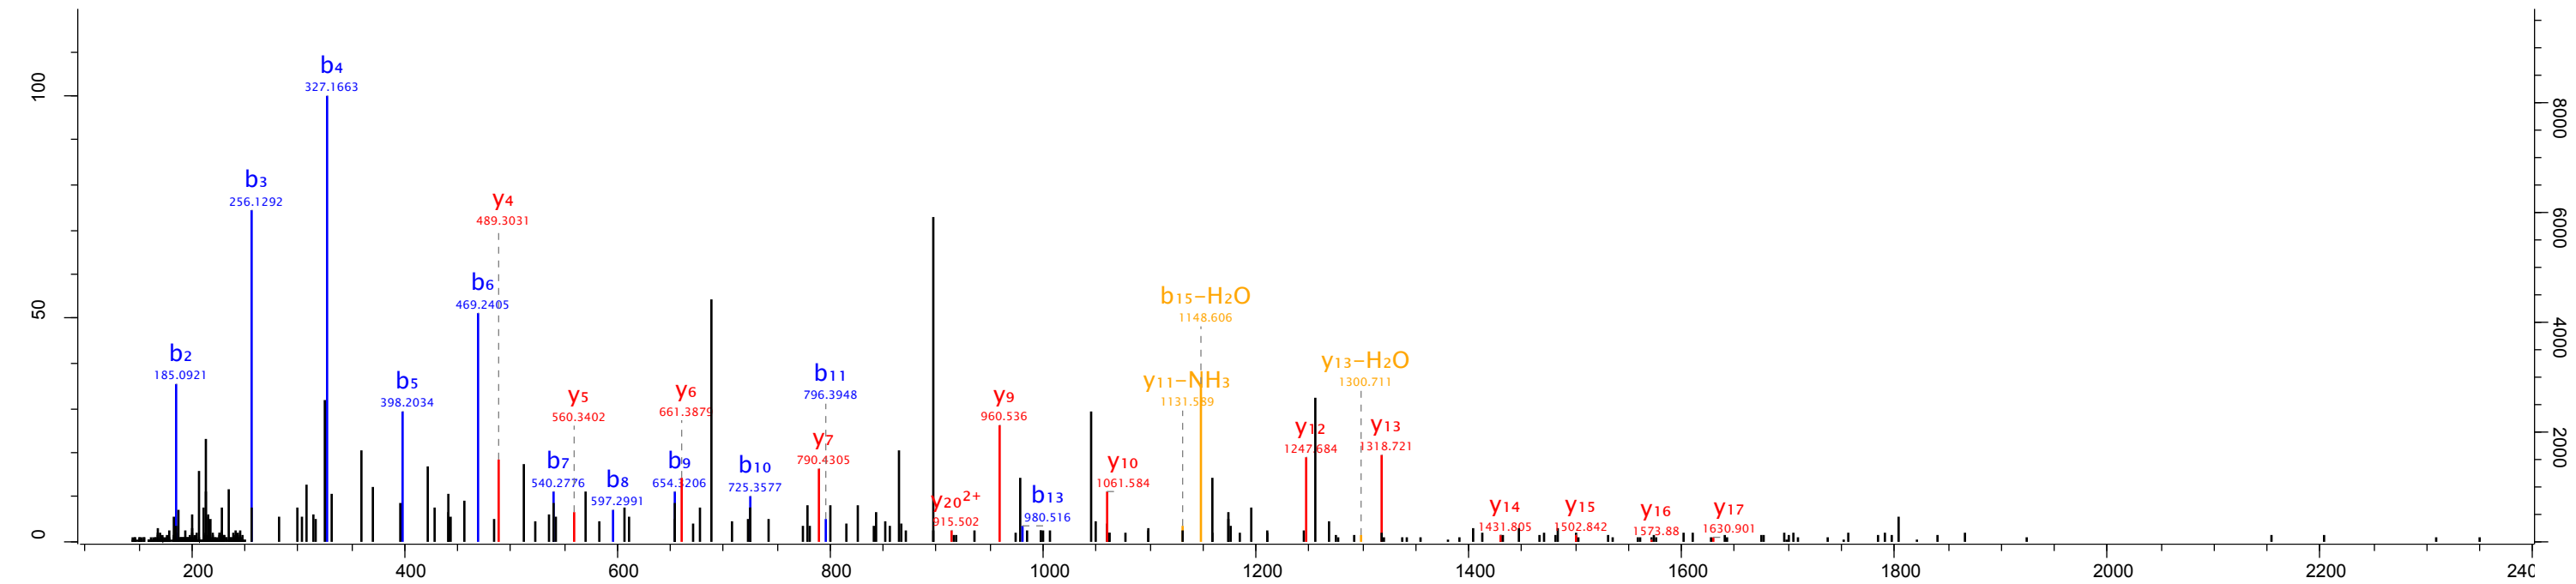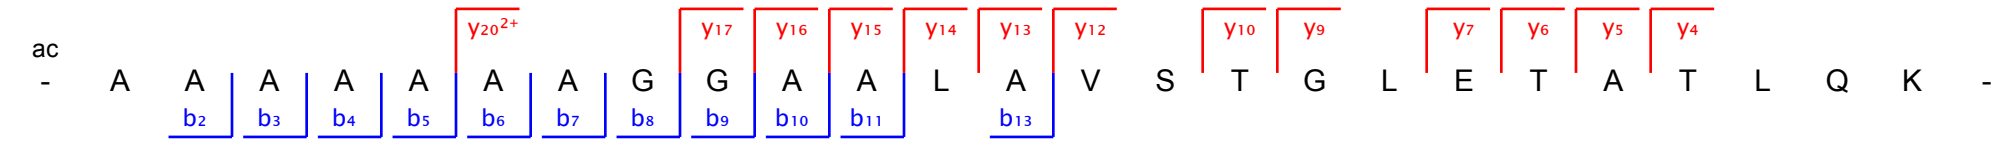

Raw file: 20150307\_NSC3\_Top\_opt\_F3\_01\_1691  
 Scan: 71540 Method: TOF; CID Score: 183.7 m/z: 989.49 Gene names: G6pc3

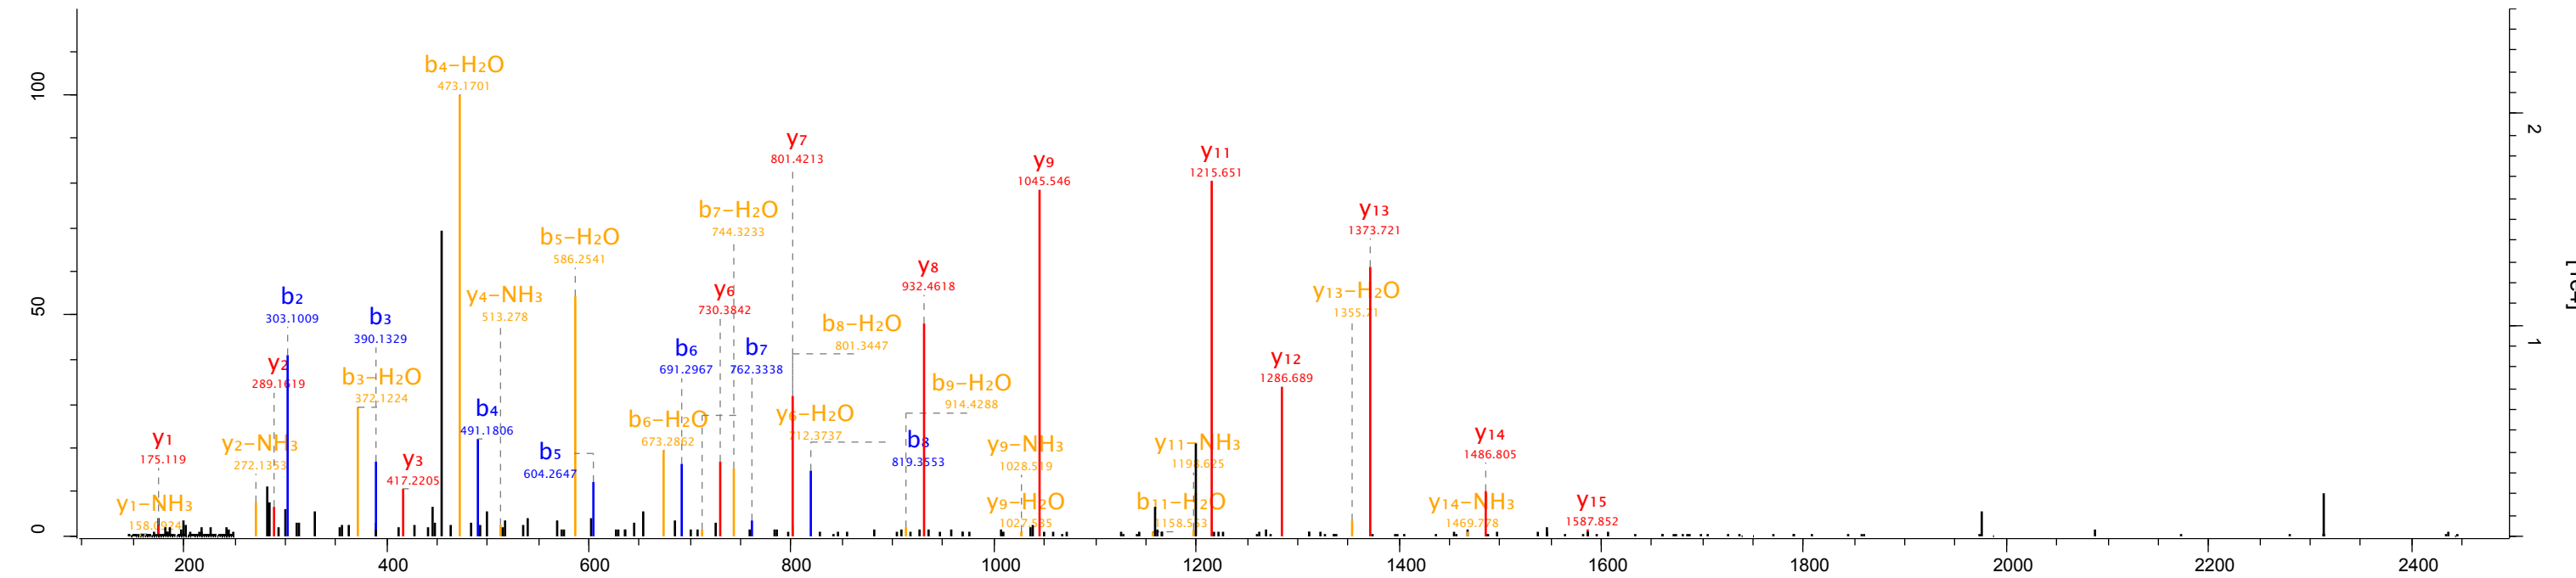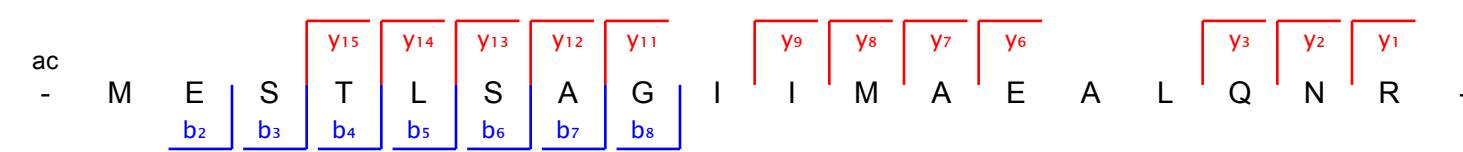

Supplement: supp_M114.047407_mcp.M114.047407-9.pdf [file supp_M114.047407_mcp.M114.047407-9.pdf]
