# Supplementary material for: The Impact II, a Very High-Resolution Quadrupole Time-of-Flight Instrument (QTOF) for Deep Shotgun Proteomics
Source: PubMed Central journal article supplement (PMC4587313; doi:10.1074/mcp.m114.047407), 2015-05-19

| Raw file                          | Scan | Method   | Score  | m/z    | Gene names |
|-----------------------------------|------|----------|--------|--------|------------|
| 20140918_fract1_dyn_5ul_D1_01_367 | 5371 | TOF; CID | 131.06 | 330.19 | HMGN4      |

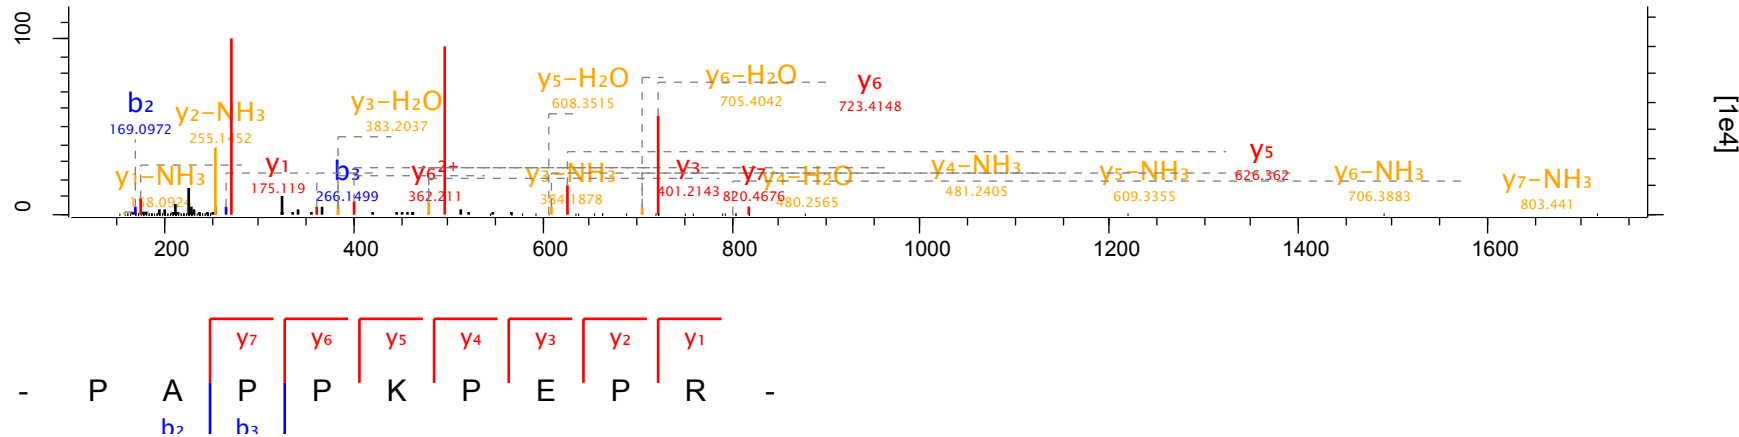

| Raw file                          | Scan  | Method   | Score | m/z    | Gene names |
|-----------------------------------|-------|----------|-------|--------|------------|
| 20140918_fract1_dyn_5ul_D1_01_367 | 11637 | TOF; CID | 120.9 | 393.73 | BBC3       |

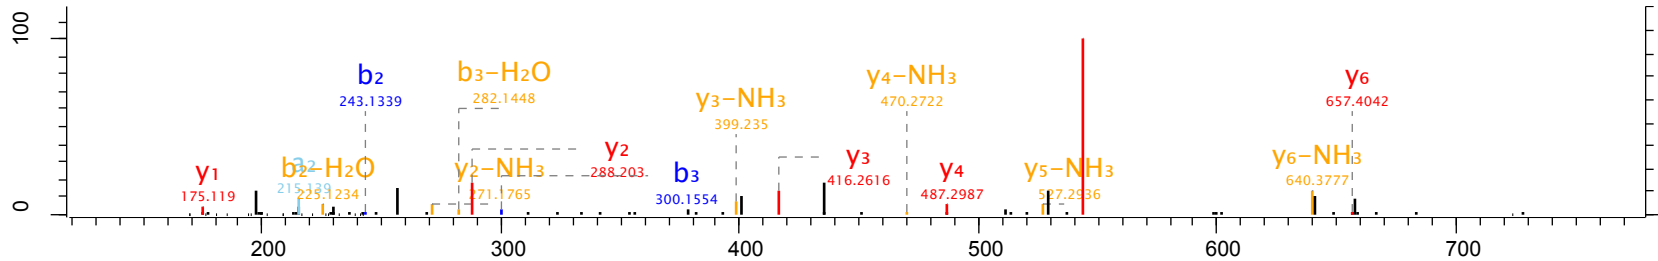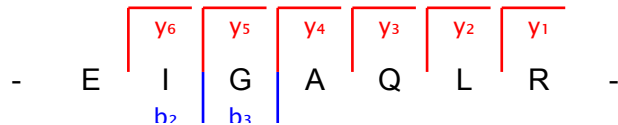

Raw file

20140918\_fract1\_dyn\_5ul\_D1\_01\_367

Scan

12432

Method

TOF; CID

Score

125.75

m/z

652.32

Gene names

USH1C

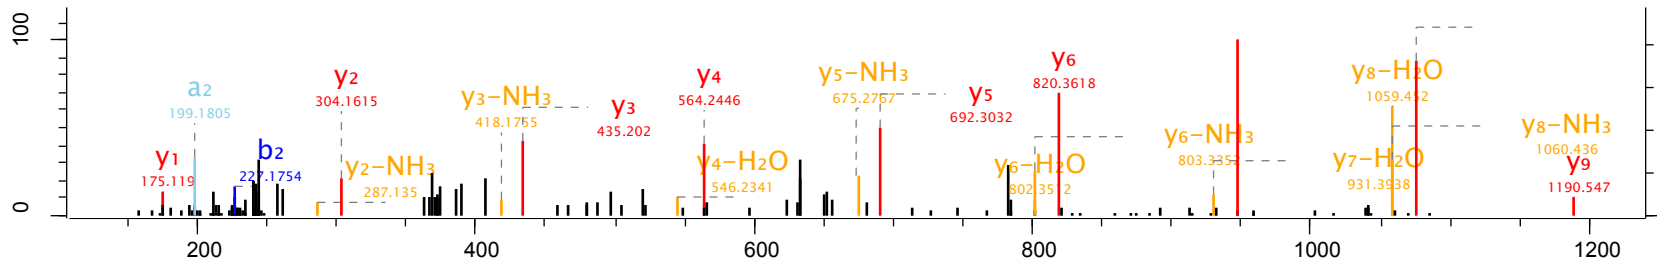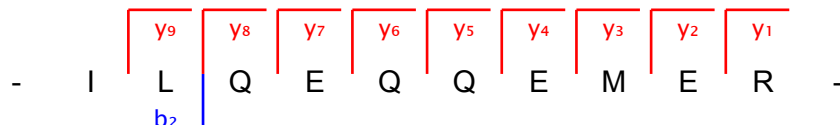

| Raw file                          | Scan  | Method   | Score  | m/z    | Gene names |
|-----------------------------------|-------|----------|--------|--------|------------|
| 20140918_fract1_dyn_5ul_D1_01_367 | 13249 | TOF; CID | 155.84 | 552.78 | VAMP8      |

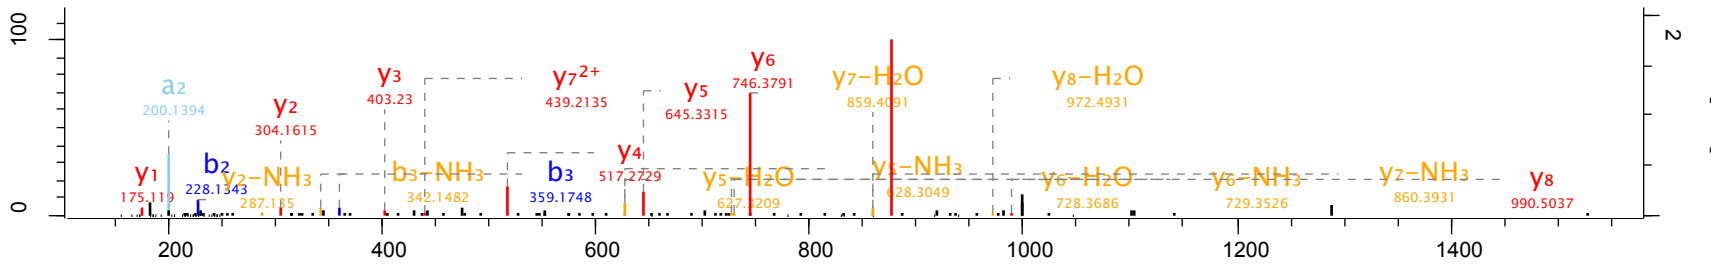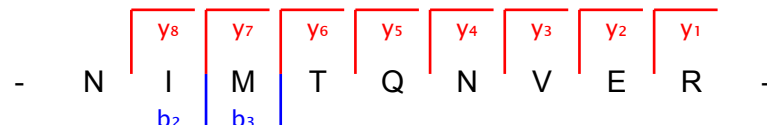

| Raw file                          | Scan  | Method   | Score | m/z    | Gene names |
|-----------------------------------|-------|----------|-------|--------|------------|
| 20140918_fract1_dyn_5ul_D1_01_367 | 14036 | TOF; CID | 87.78 | 599.84 | SDC4       |

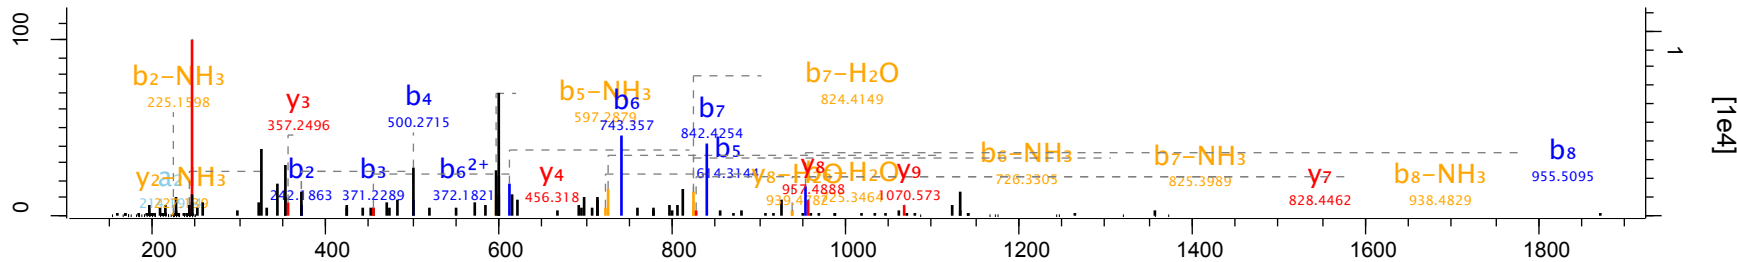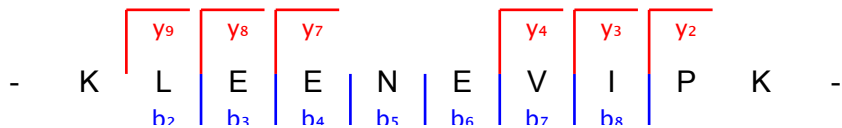

| Raw file                          | Scan  | Method   | Score | m/z    | Gene names |
|-----------------------------------|-------|----------|-------|--------|------------|
| 20140918_fract1_dyn_5ul_D1_01_367 | 14149 | TOF; CID | 91.31 | 538.29 | PTMS       |

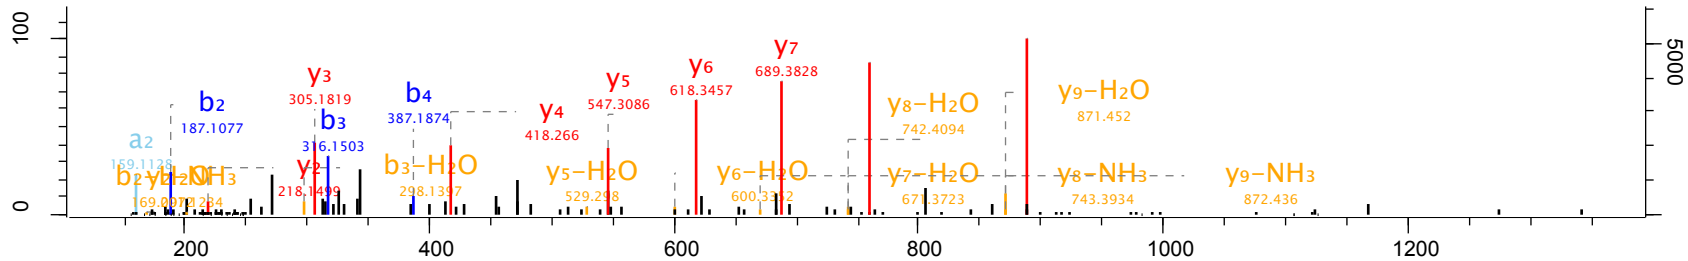

- S V E A A A E L S A K -

b<sub>2</sub> b<sub>3</sub> b<sub>4</sub>

y<sub>9</sub> y<sub>8</sub> y<sub>7</sub> y<sub>6</sub> y<sub>5</sub> y<sub>4</sub> y<sub>3</sub> y<sub>2</sub>

Raw file

20140918\_fract1\_dyn\_5ul\_D1\_01\_367

Scan

17331

Method

TOF; CID

Score

67.9

m/z

673.33

Gene names

NEK3

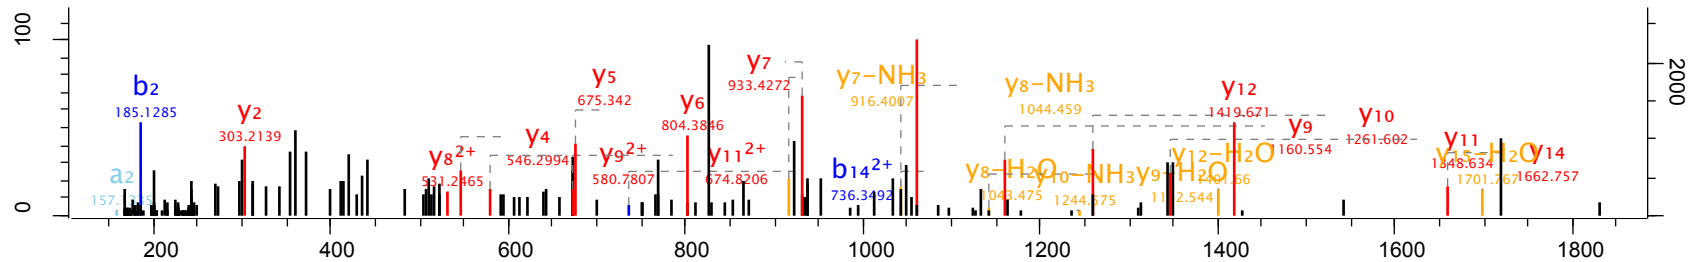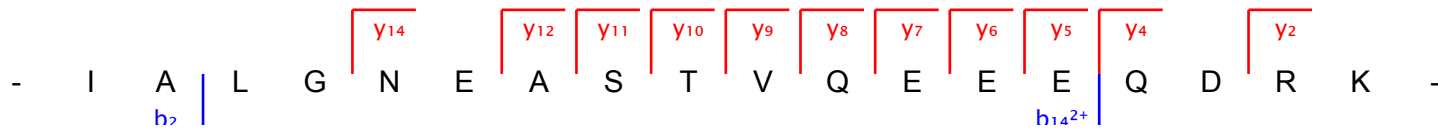

| Raw file                          | Scan  | Method   | Score | m/z    | Gene names |
|-----------------------------------|-------|----------|-------|--------|------------|
| 20140918_fract1_dyn_5ul_D1_01_367 | 18973 | TOF; CID | 83.75 | 312.54 | ZNF668     |

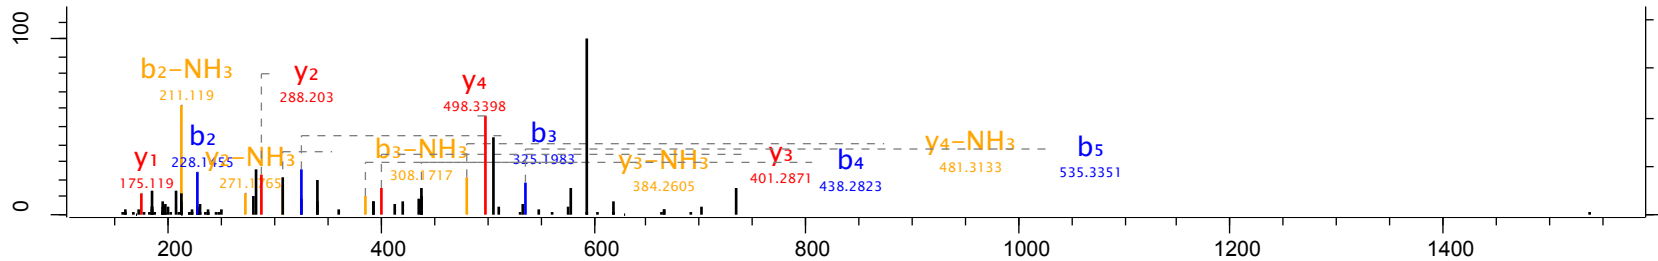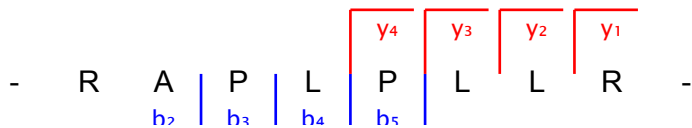



Raw file

20140918\_fract1\_dyn\_5ul\_D1\_01\_367

Scan

19764

Method

TOF; CID

Score

58.71

m/z

576.26

Gene names

GCA

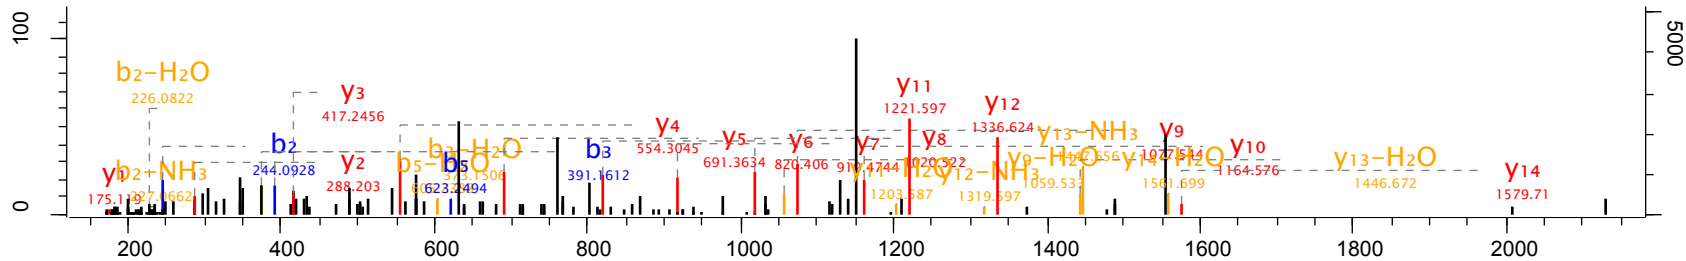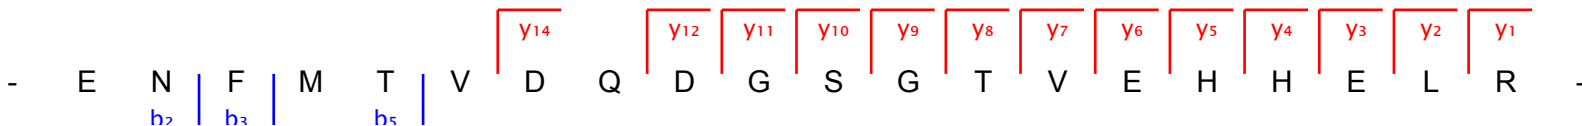

Raw file

20140918\_fract1\_dyn\_5ul\_D1\_01\_367

Scan

22779

Method

TOF; CID

Score

104.01

m/z

527.77

Gene names

S100A3

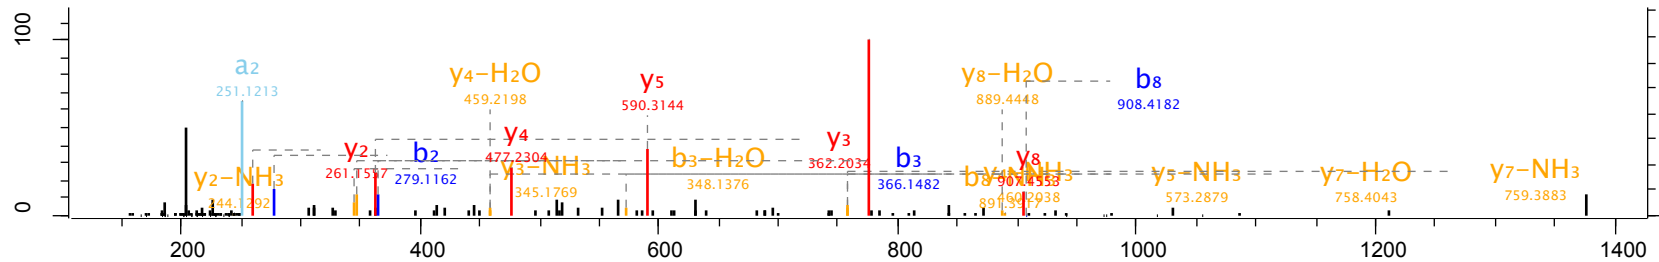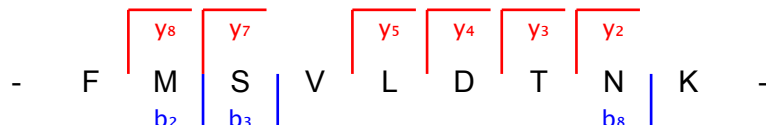

| Raw file                          | Scan  | Method   | Score | m/z    | Gene names |
|-----------------------------------|-------|----------|-------|--------|------------|
| 20140918_fract1_dyn_5ul_D1_01_367 | 25911 | TOF; CID | 106.4 | 597.31 | FBXL17     |

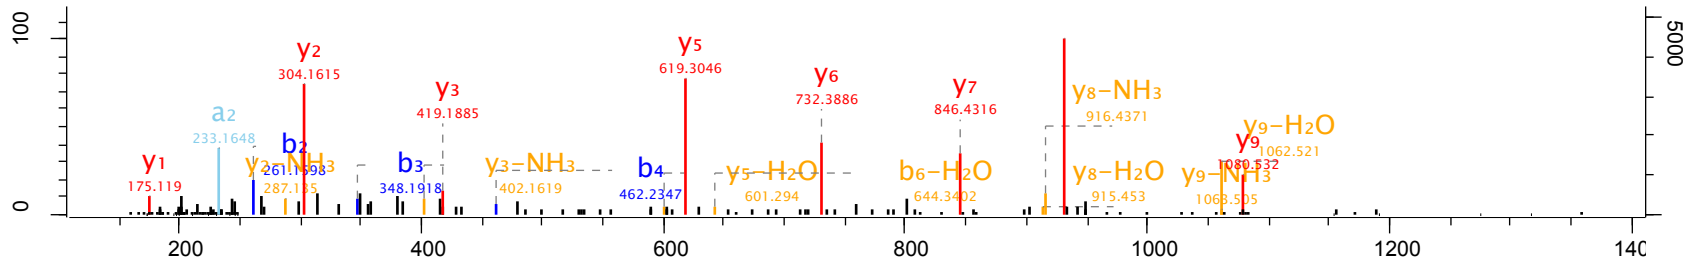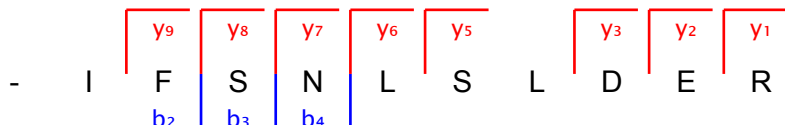

Raw file

20140918\_fract1\_dyn\_5ul\_D1\_01\_367

Scan

25930

Method

TOF; CID

Score

171.46

m/z

853.39

Gene names

TMEM179B

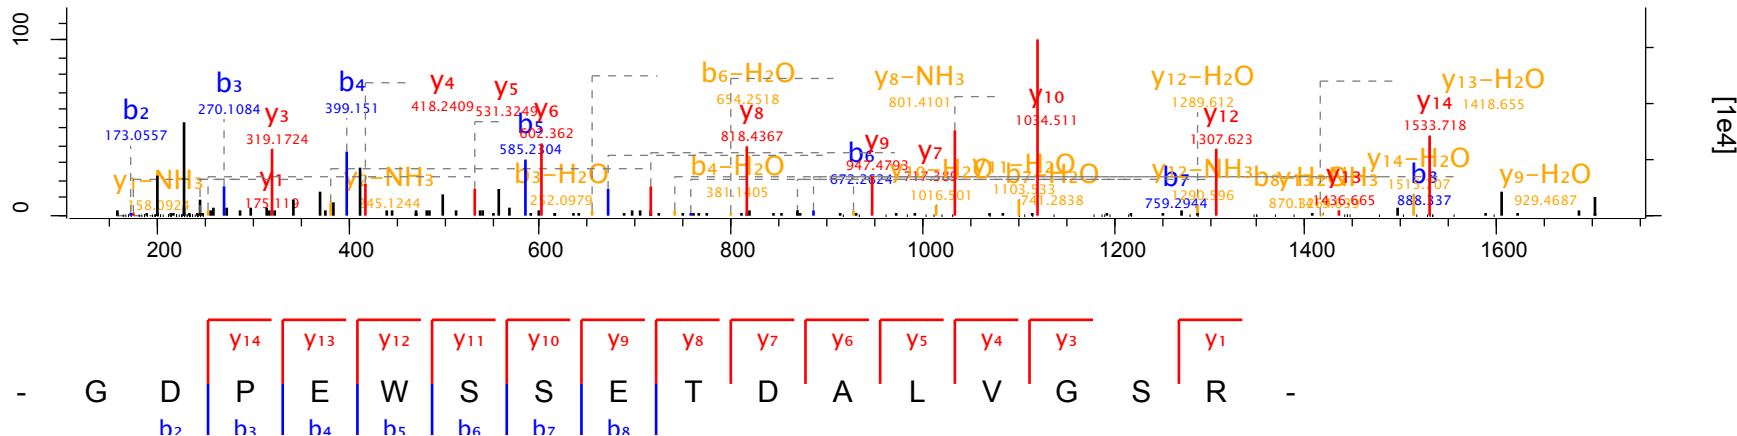

| Raw file                          | Scan  | Method   | Score | m/z    | Gene names |
|-----------------------------------|-------|----------|-------|--------|------------|
| 20140918_fract1_dyn_5ul_D1_01_367 | 27369 | TOF; CID | 68.49 | 556.82 | HMG5       |

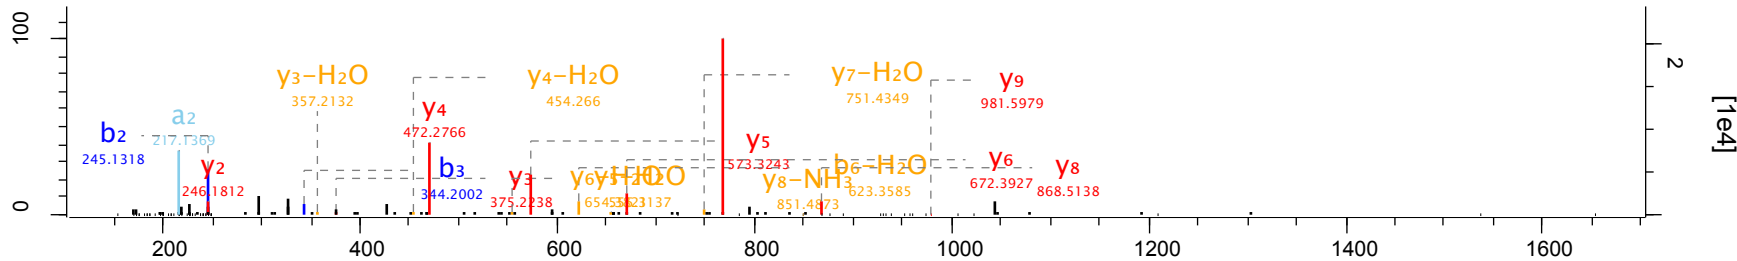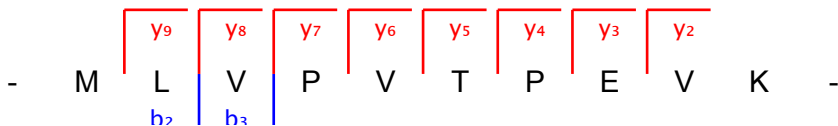

Raw file

20140918\_fract1\_dyn\_5ul\_D1\_01\_367

Scan

27688

Method

TOF; CID

Score

115.78

m/z

640.34

Gene names

METTL23

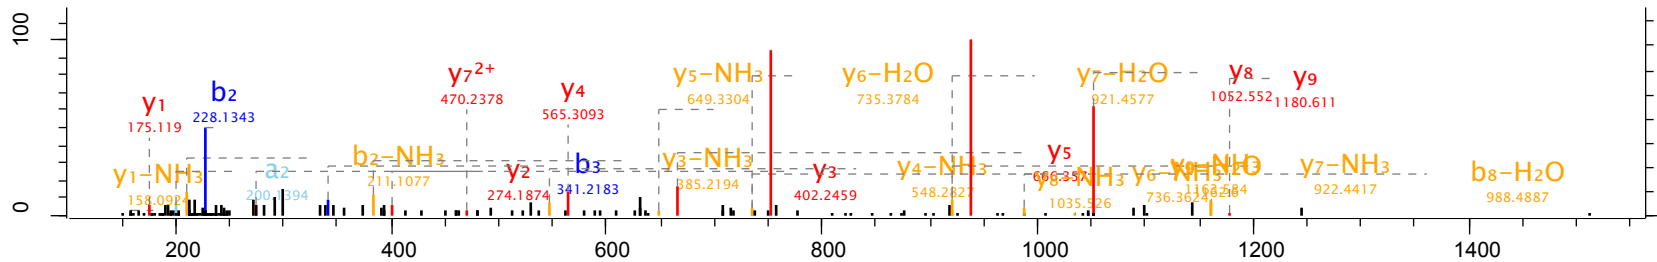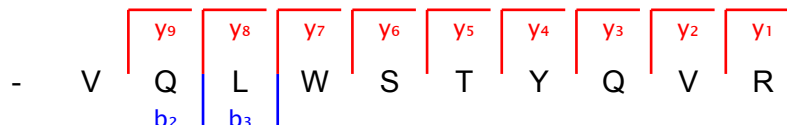

Raw file

20140918\_fract1\_dyn\_5ul\_D1\_01\_367

Scan

28710

Method

TOF; CID

Score

56.57

m/z

567.32

Gene names

NPHP3

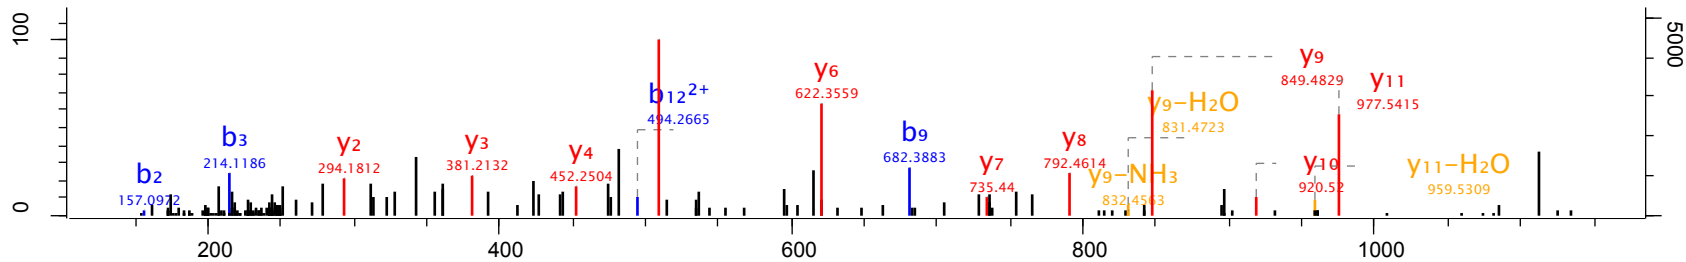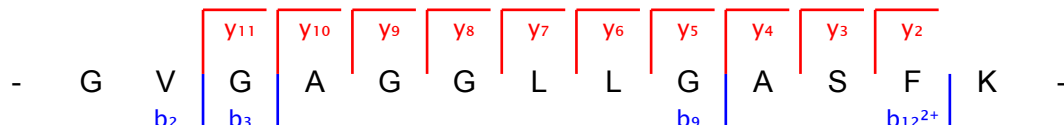

Raw file

20140918\_fract1\_dyn\_5ul\_D1\_01\_367

Scan

29299

Method

TOF; CID

Score

95.27

m/z

469.25

Gene names

CHAC1

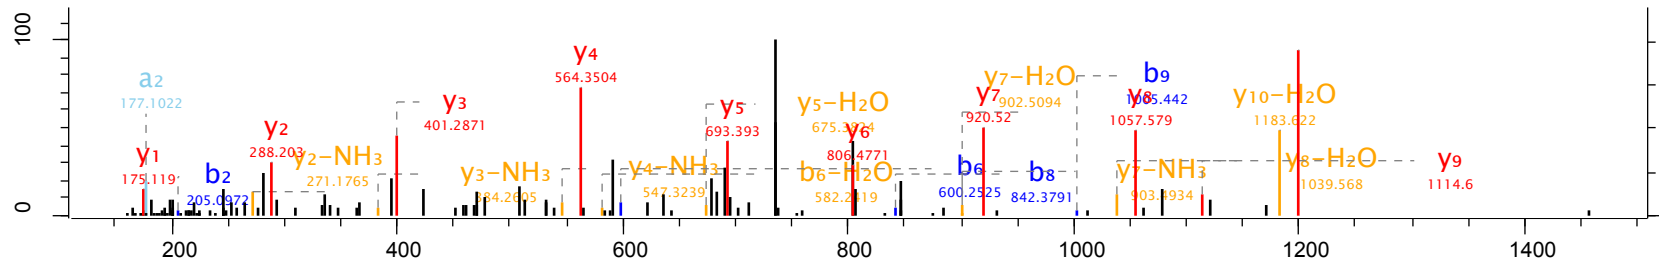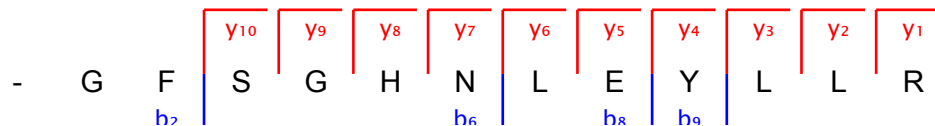



| Raw file                          | Scan  | Method   | Score  | m/z    | Gene names |
|-----------------------------------|-------|----------|--------|--------|------------|
| 20140918_fract1_dyn_5ul_D1_01_367 | 30752 | TOF; CID | 106.68 | 552.31 | CYB5D2     |

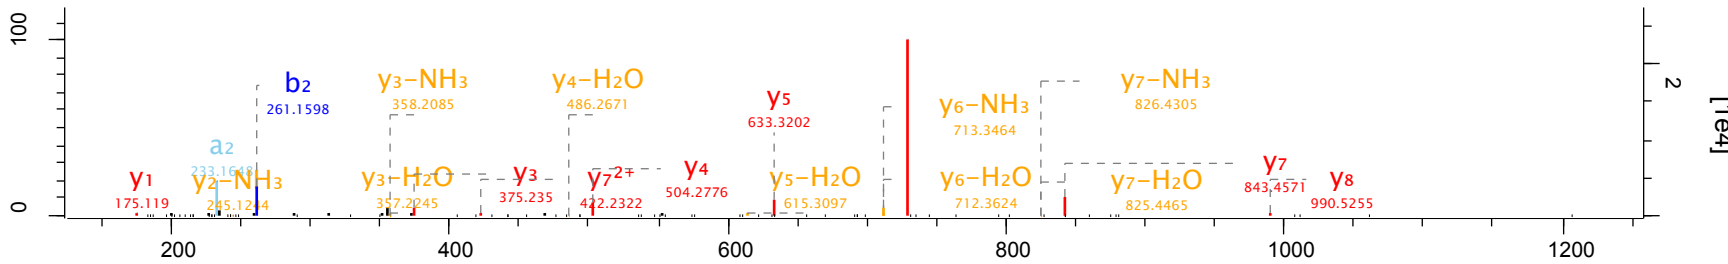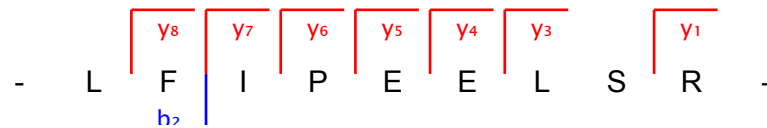

| Raw file                          | Scan  | Method   | Score | m/z    | Gene names |
|-----------------------------------|-------|----------|-------|--------|------------|
| 20140918_fract1_dyn_5ul_D1_01_367 | 31299 | TOF; CID | 54.67 | 998.52 | GLYCTK     |

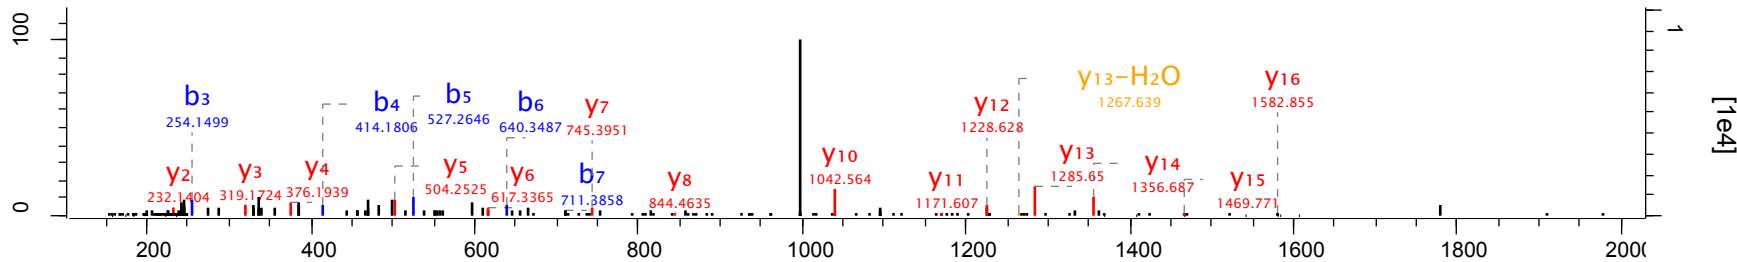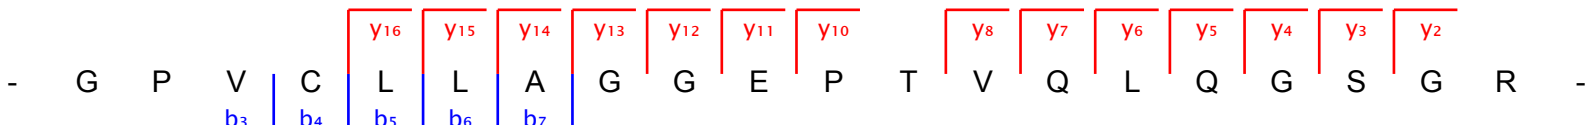

Raw file

20140918\_fract1\_dyn\_5ul\_D1\_01\_367

Scan

31857

Method

TOF; CID

Score

119.65

m/z

872.47

Gene names

BTF3L4

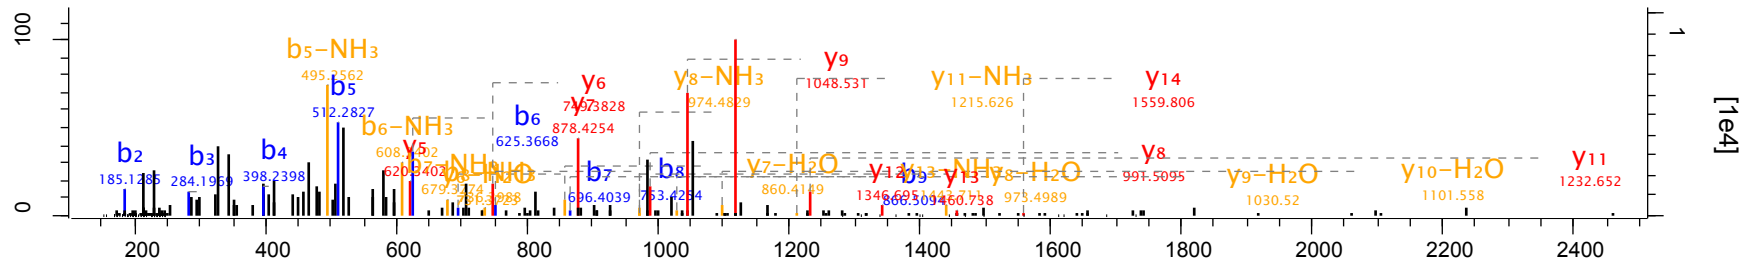

- L A V N N I A G I E E S W T V K -

b<sub>2</sub> b<sub>3</sub> b<sub>4</sub> b<sub>5</sub> b<sub>6</sub> b<sub>7</sub> b<sub>8</sub> b<sub>9</sub> y<sub>14</sub> y<sub>13</sub> y<sub>12</sub> y<sub>11</sub> y<sub>10</sub> y<sub>9</sub> y<sub>8</sub> y<sub>7</sub> y<sub>6</sub> y<sub>5</sub>

| Raw file                          | Scan  | Method   | Score | m/z  | Gene names |
|-----------------------------------|-------|----------|-------|------|------------|
| 20140918_fract1_dyn_5ul_D1_01_367 | 31947 | TOF; CID | 52.81 | 1047 | KMT2E      |

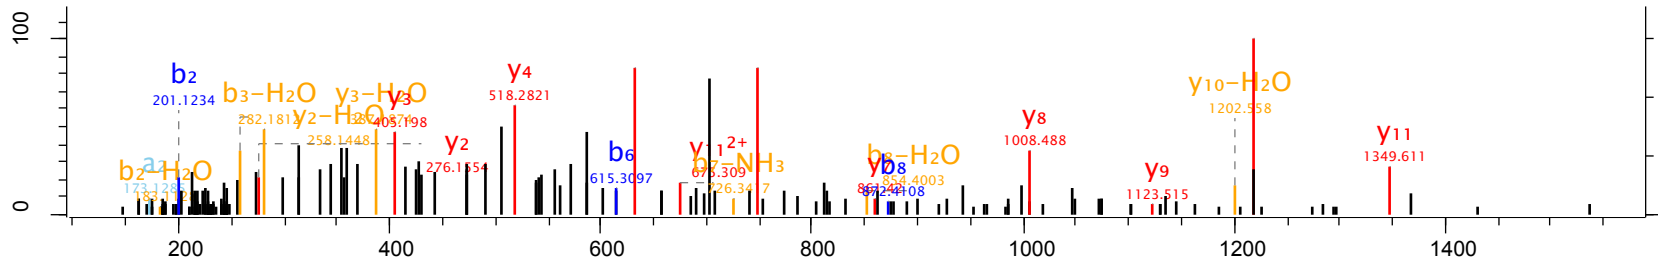

- L S V S N N Q E P D F I D D I E E K -  
 | | |  
 b2 b6 b8  
 y11 y10 y9 y8 y7 y6 y5 y4 y3 y2

Raw file

20140918\_fract1\_dyn\_5ul\_D1\_01\_367

Scan

33339

Method

TOF; CID

Score

47.56

m/z

772.74

Gene names

PLLP

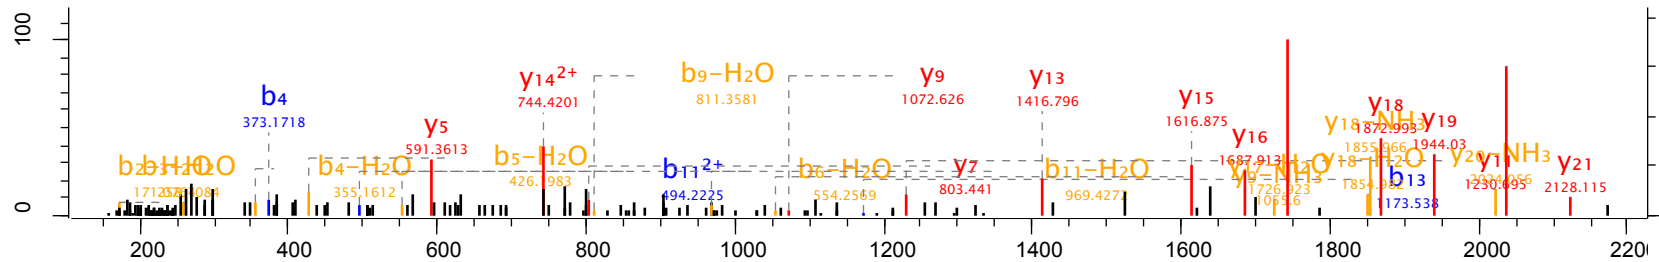

- T S S P A Q G A E A S V S A L R P D L G F

$y_{21}$   $y_{20}$   $y_{19}$   $y_{18}$   $y_{17}$   $y_{16}$   $y_{15}$   $y_{14}^{2+}$   $y_{13}$   $y_{11}$   $y_9$   $y_7$   $y_5$   
 $b_4$   $b_{11}^{2+}$   $b_{13}$

| Raw file                          | Scan  | Method   | Score | m/z    | Gene names |
|-----------------------------------|-------|----------|-------|--------|------------|
| 20140918_fract1_dyn_5ul_D1_01_367 | 38702 | TOF; CID | 92.27 | 613.65 | TMEM234    |

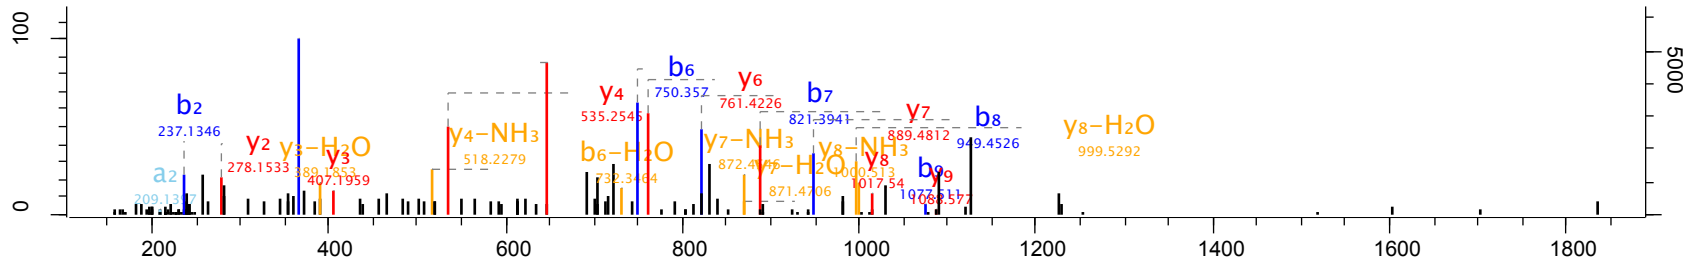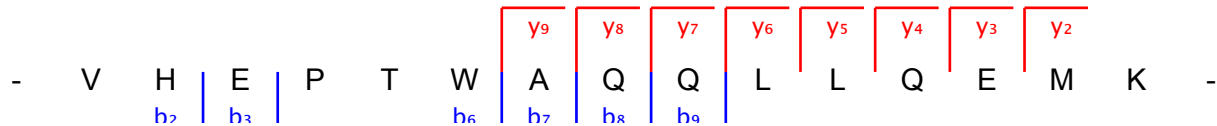

Raw file

20140918\_fract1\_dyn\_5ul\_D1\_01\_367

Scan

38950

Method

TOF; CID

Score

98.06

m/z

1026.5

Gene names

ZNF410

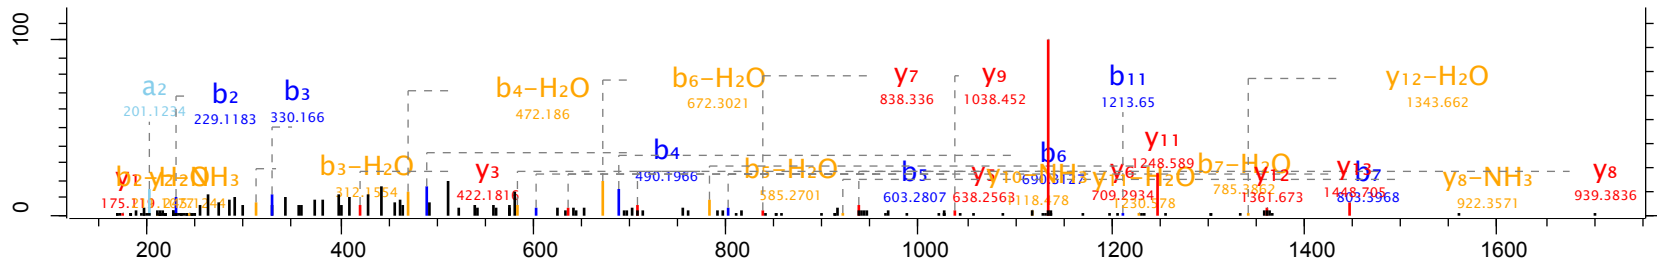

- D I T C L S L L P V T E A S E C S R -

h<sub>2</sub> h<sub>3</sub> h<sub>4</sub> h<sub>5</sub> h<sub>6</sub> h<sub>7</sub> h<sub>11</sub>

y<sub>13</sub> y<sub>12</sub> y<sub>11</sub> y<sub>10</sub> y<sub>9</sub> y<sub>8</sub> y<sub>7</sub> y<sub>6</sub> y<sub>5</sub> y<sub>3</sub> y<sub>1</sub>

Raw file

20140918\_fract2\_dyn\_5ul\_D2\_01\_369

Scan

5194

Method

TOF; CID

Score

123.99

m/z

349.2

Gene names

E4F1

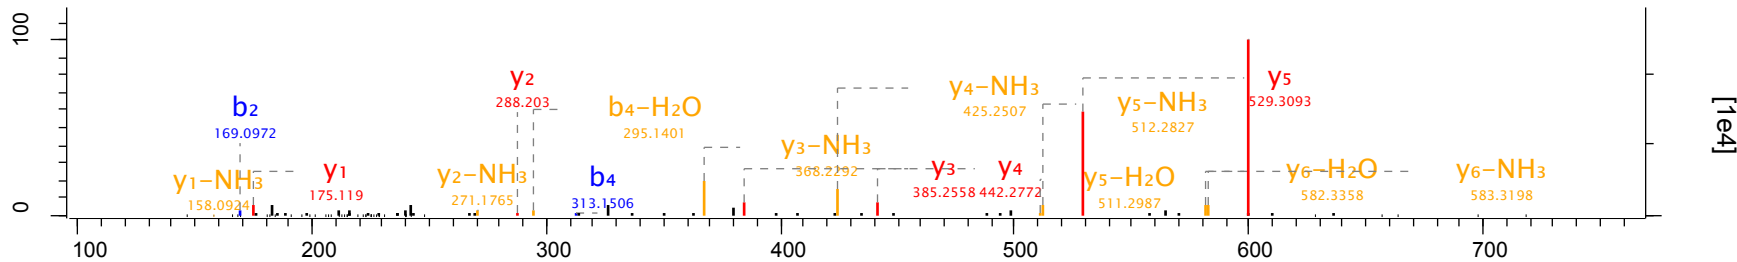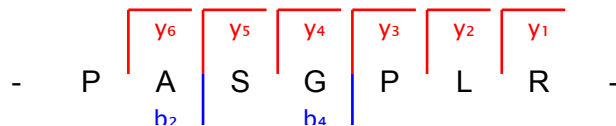



Raw file

20140918\_fract2\_dyn\_5ul\_D2\_01\_369

Scan

7094

Method

TOF; CID

Score

56.53

m/z

615.32

Gene names

CD164

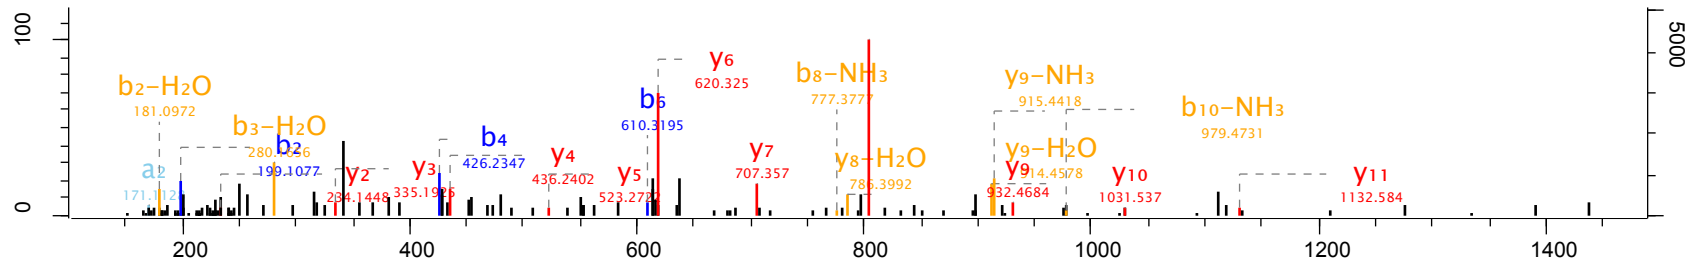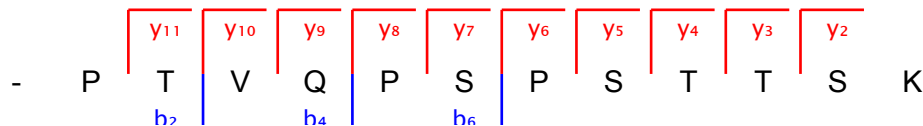

| Raw file                          | Scan | Method   | Score | m/z    | Gene names |
|-----------------------------------|------|----------|-------|--------|------------|
| 20140918_fract2_dyn_5ul_D2_01_369 | 8659 | TOF; CID | 60.17 | 478.76 | EPM2A      |

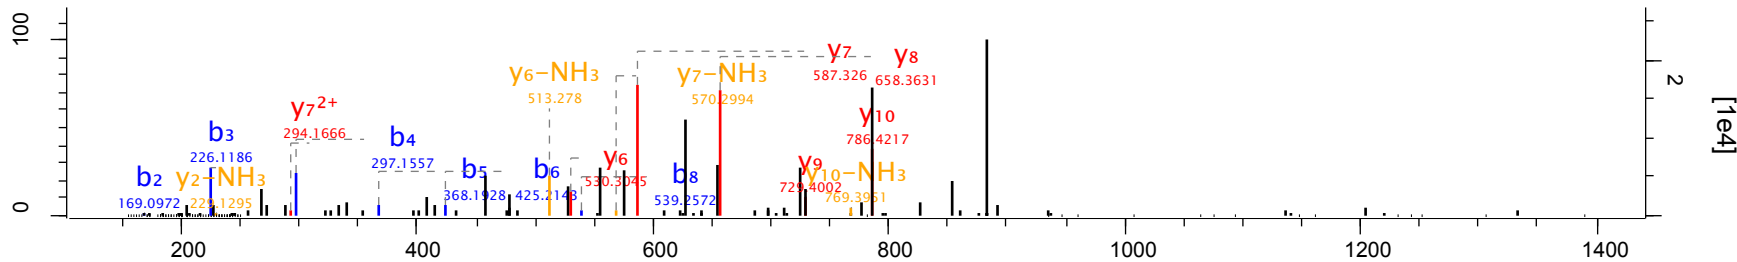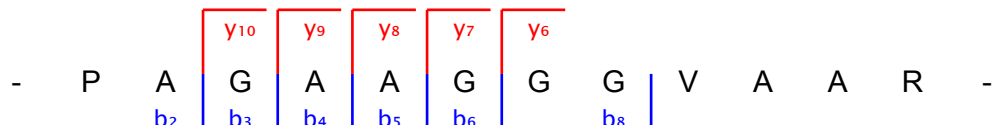

Raw file

20140918\_fract2\_dyn\_5ul\_D2\_01\_369

Scan

11934

Method

TOF; CID

Score

72.82

m/z

660.32

Gene names

NDFIP2

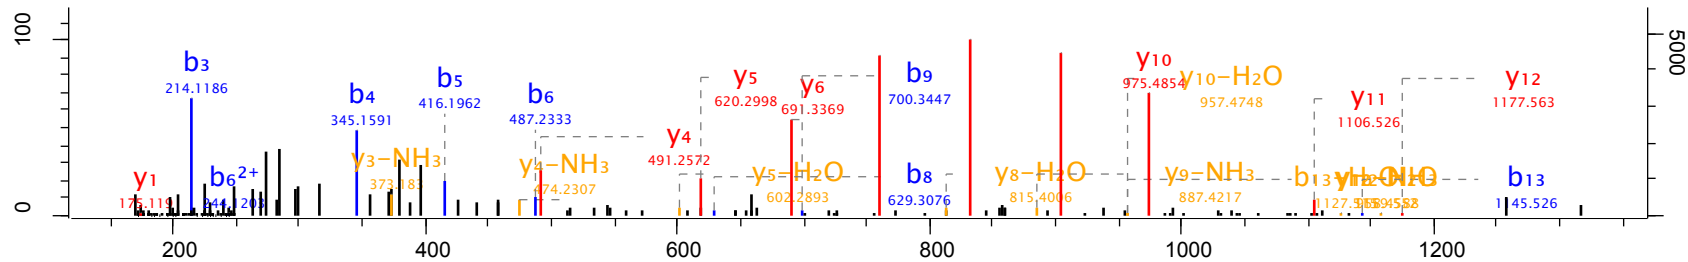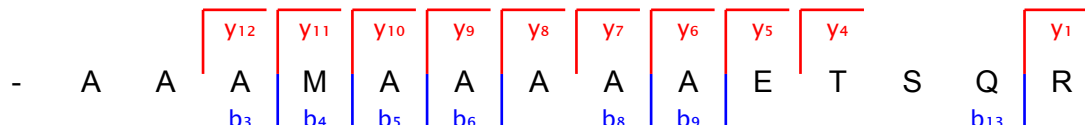

Raw file

20140918\_fract2\_dyn\_5ul\_D2\_01\_369

Scan

12204

Method

TOF; CID

Score

117.2

m/z

552.56

Gene names

GNG12

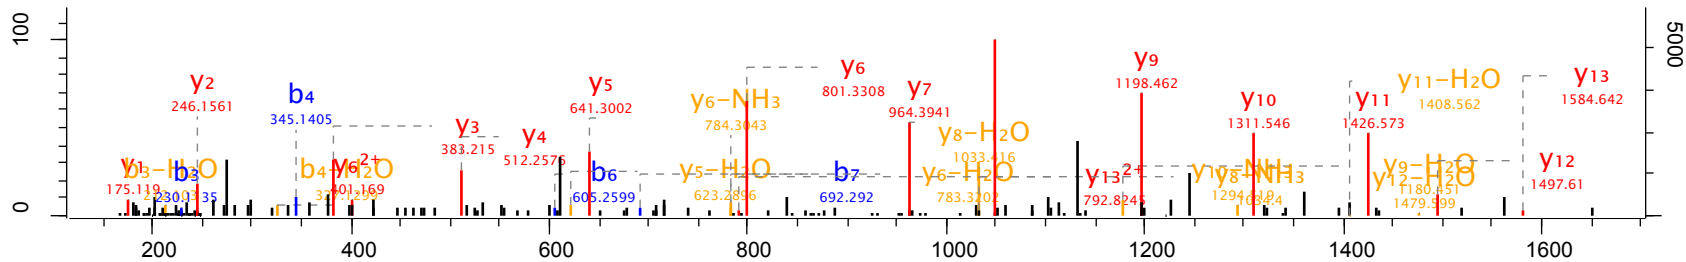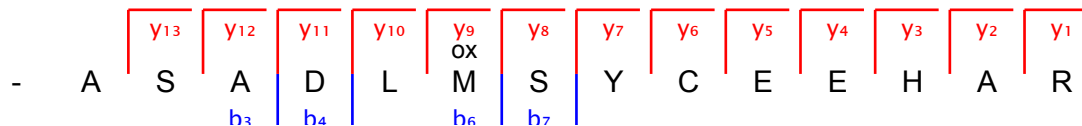

| Raw file                          | Scan  | Method   | Score  | m/z    | Gene names |
|-----------------------------------|-------|----------|--------|--------|------------|
| 20140918_fract2_dyn_5ul_D2_01_369 | 12868 | TOF; CID | 202.56 | 683.36 | CYSTM1     |

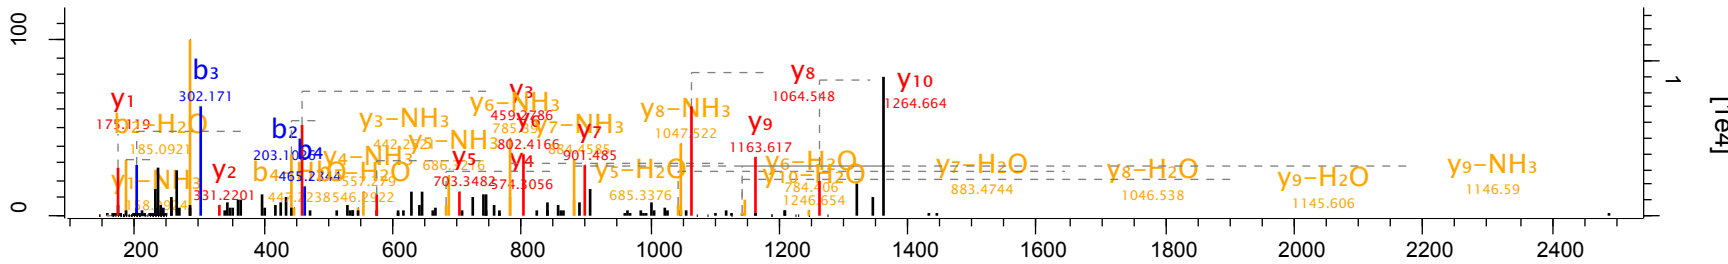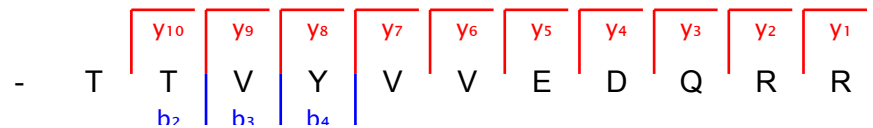

| Raw file                          | Scan  | Method   | Score | m/z    | Gene names |
|-----------------------------------|-------|----------|-------|--------|------------|
| 20140918_fract2_dyn_5ul_D2_01_369 | 13095 | TOF; CID | 83.86 | 502.25 | C18orf32   |

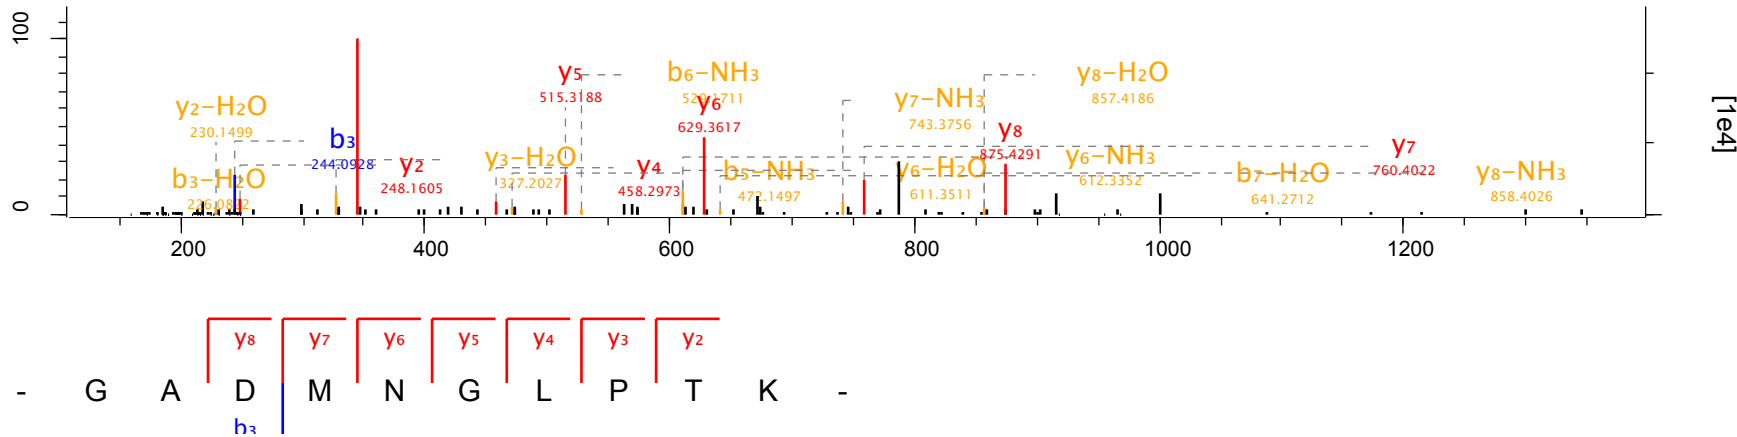

Raw file

20140918\_fract2\_dyn\_5ul\_D2\_01\_369

Scan

13430

Method

TOF; CID

Score

130.56

m/z

720.31

Gene names

LEPROTL1

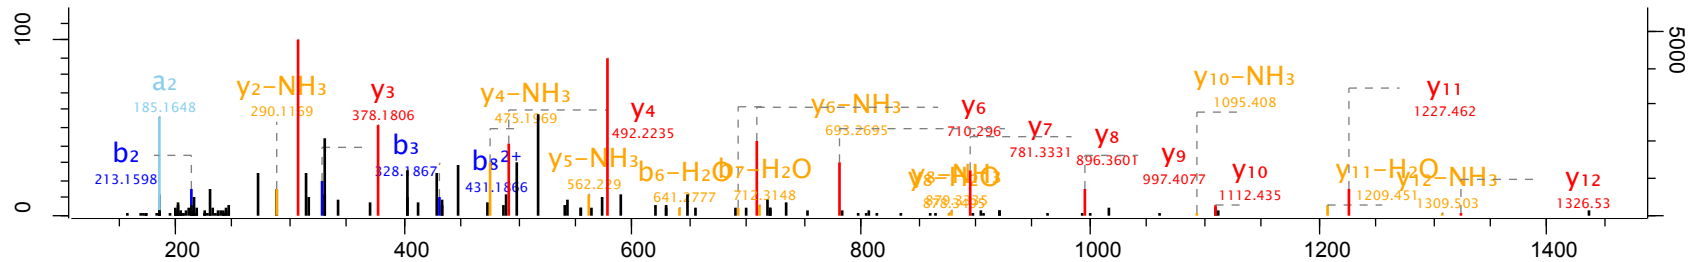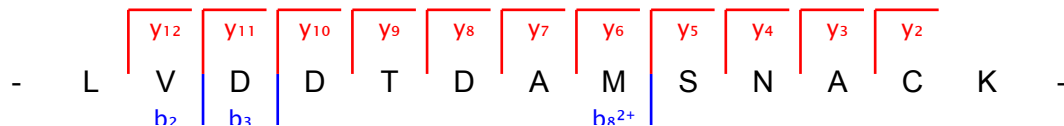

Raw file

20140918\_fract2\_dyn\_5ul\_D2\_01\_369

Scan

13600

Method

TOF; CID

Score

100.76

m/z

833.05

Gene names

C11orf48

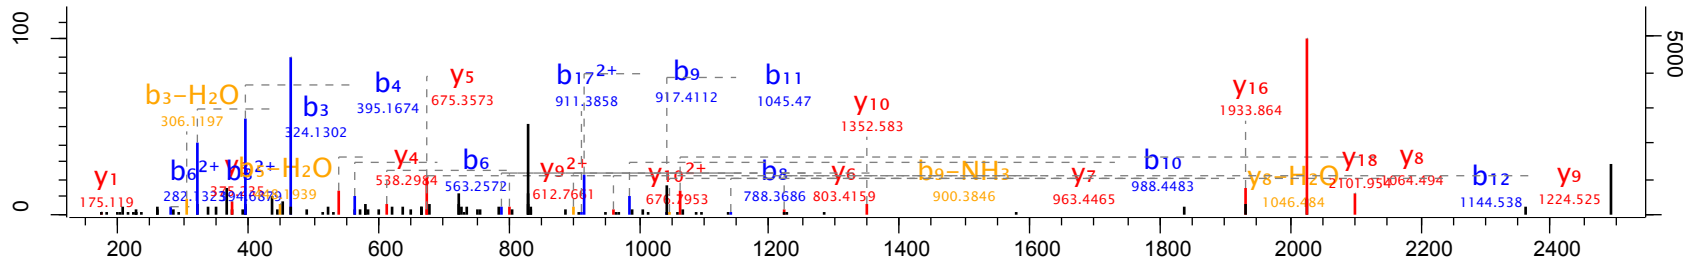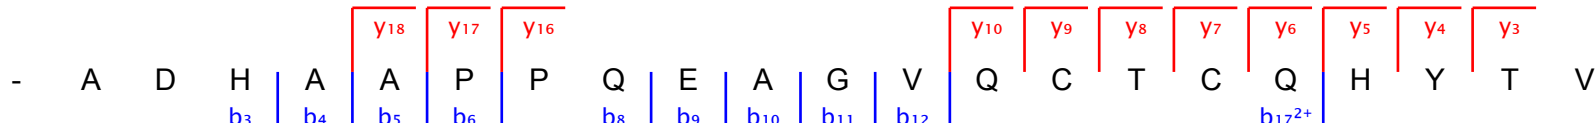



| Raw file                          | Scan  | Method   | Score | m/z    | Gene names |
|-----------------------------------|-------|----------|-------|--------|------------|
| 20140918_fract2_dyn_5ul_D2_01_369 | 14879 | TOF; CID | 99.14 | 493.76 | UTS2       |

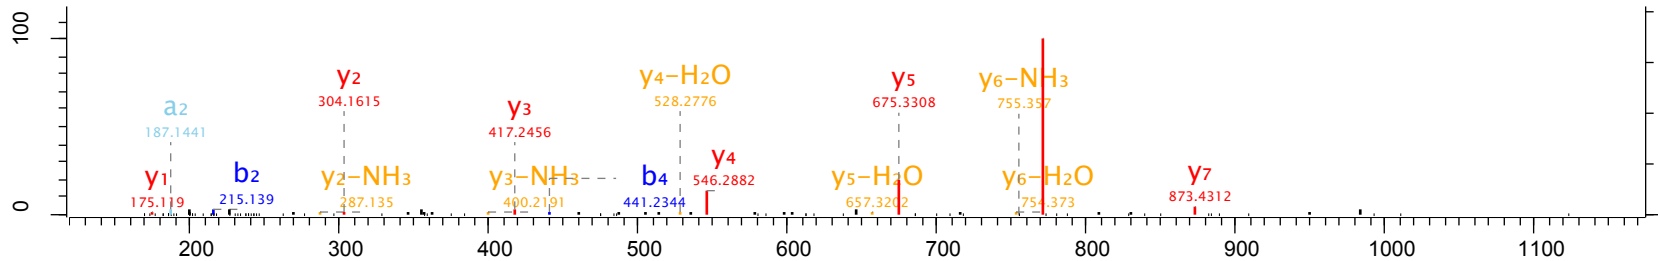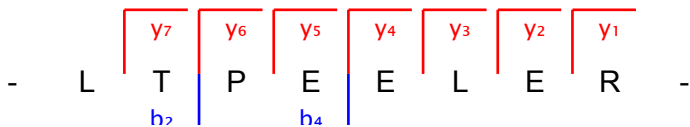

Raw file

20140918\_fract2\_dyn\_5ul\_D2\_01\_369

Scan

16447

Method

TOF; CID

Score

61.83

m/z

609.8

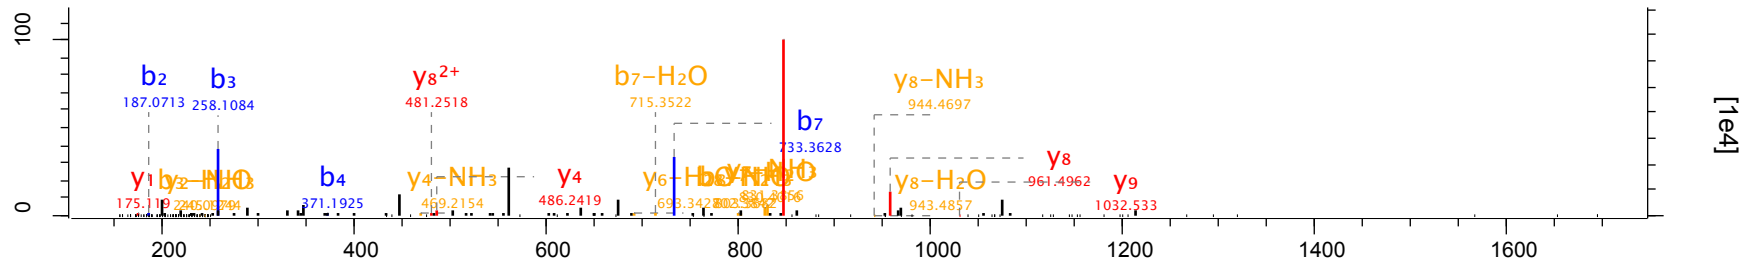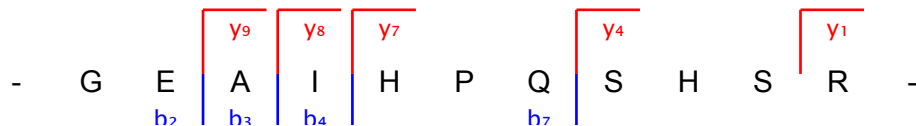

| Raw file                          | Scan  | Method   | Score  | m/z    | Gene names |
|-----------------------------------|-------|----------|--------|--------|------------|
| 20140918_fract2_dyn_5ul_D2_01_369 | 18483 | TOF; CID | 101.65 | 509.26 | PPP2R2A    |

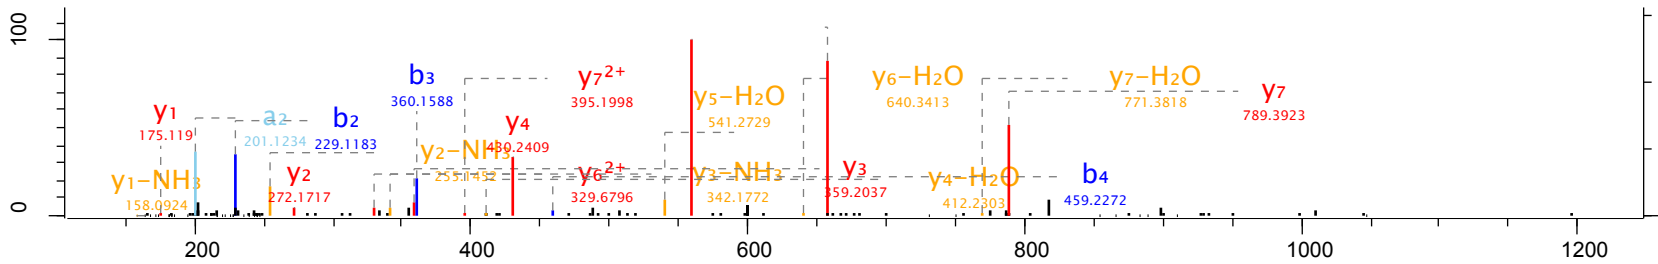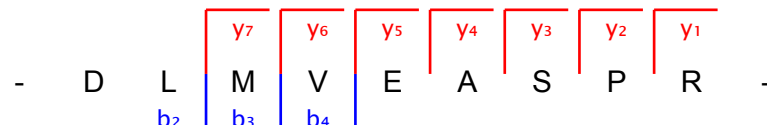

[1e4]

Raw file

20140918\_fract2\_dyn\_5ul\_D2\_01\_369

Scan

21330

Method

TOF; CID

Score

125.97

m/z

766.84

Gene names

SNX16

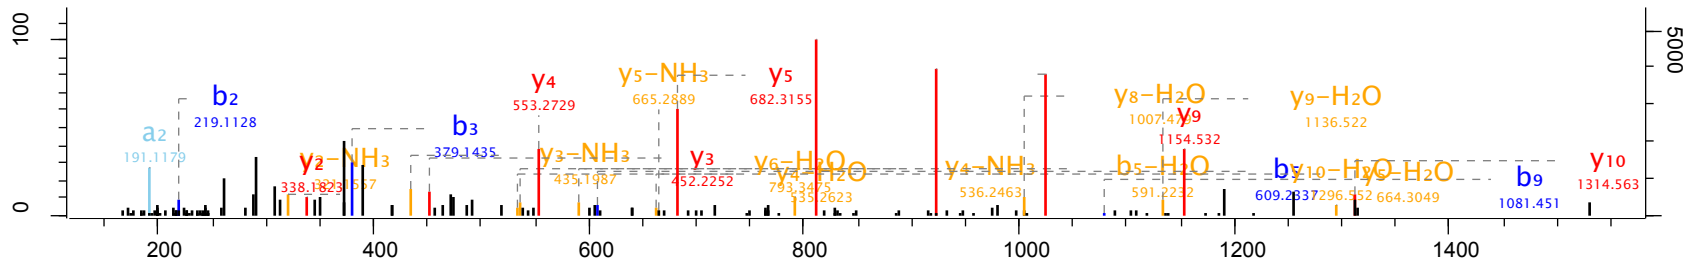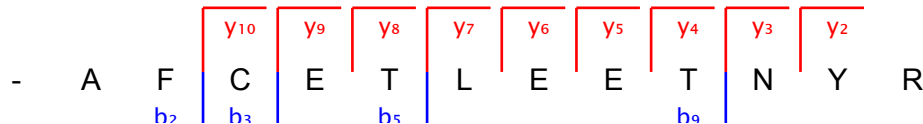

Raw file

20140918\_fract2\_dyn\_5ul\_D2\_01\_369

Scan

23515

Method

TOF; CID

Score

65.37

m/z

674.32

Gene names

BATF3

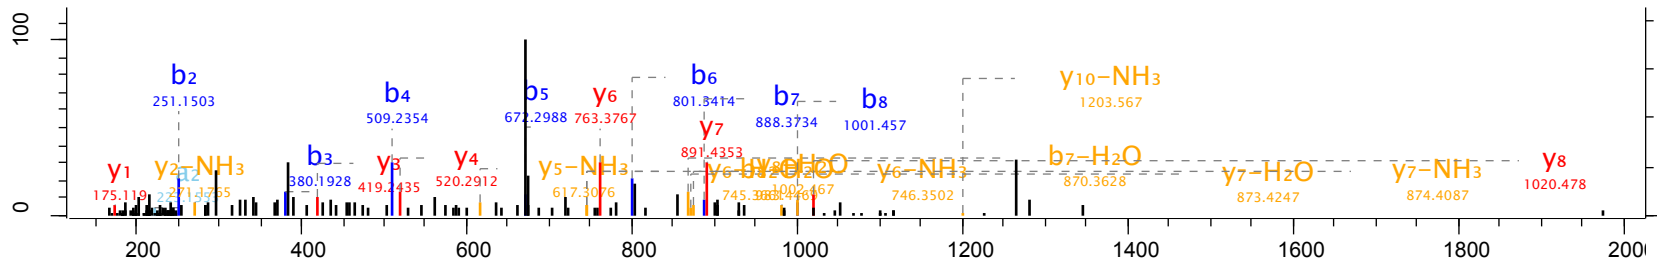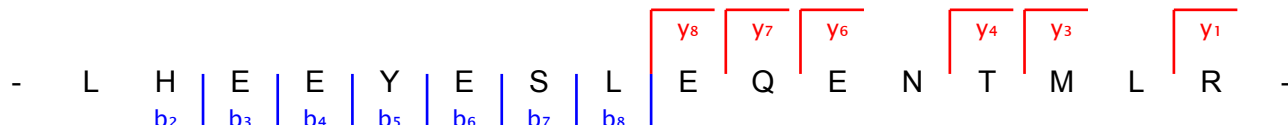

Raw file

20140918\_fract2\_dyn\_5ul\_D2\_01\_369

Scan

24119

Method

TOF; CID

Score

72.32

m/z

532.95

Gene names

METRN

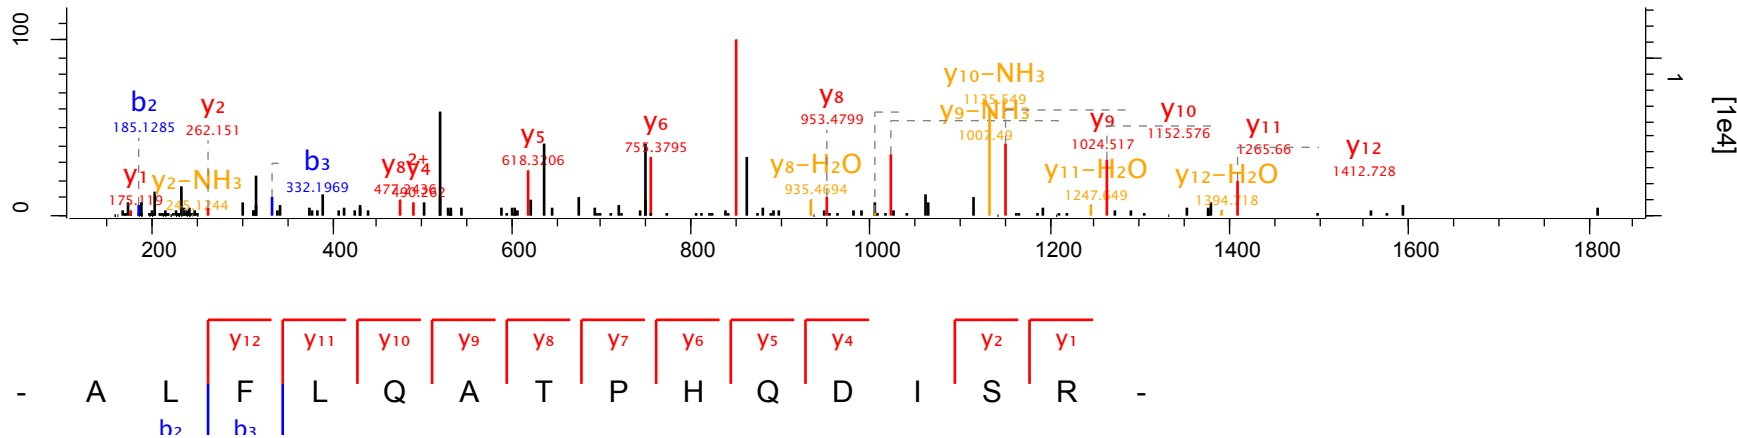

| Raw file                          | Scan  | Method   | Score | m/z    | Gene names |
|-----------------------------------|-------|----------|-------|--------|------------|
| 20140918_fract2_dyn_5ul_D2_01_369 | 26625 | TOF; CID | 95.18 | 756.86 | FAM73A     |

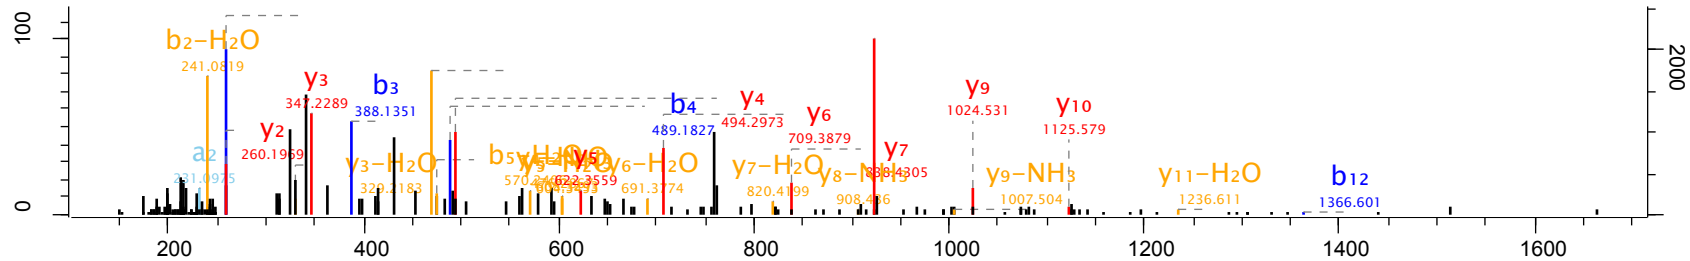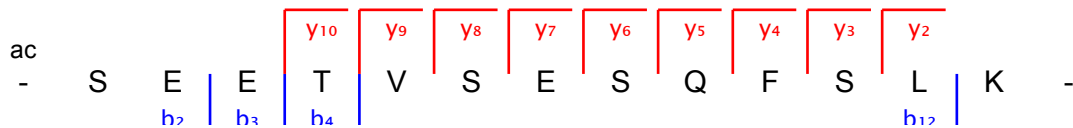

| Raw file                          | Scan  | Method   | Score | m/z    | Gene names |
|-----------------------------------|-------|----------|-------|--------|------------|
| 20140918_fract2_dyn_5ul_D2_01_369 | 29883 | TOF; CID | 94.66 | 429.77 | JPH4       |

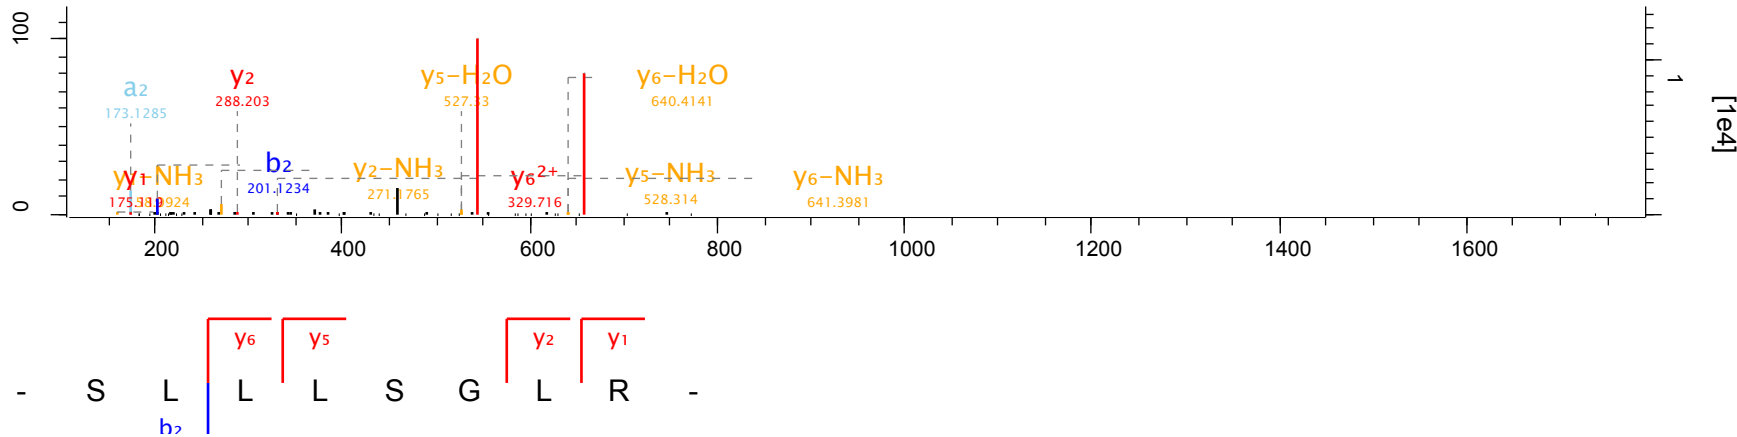



Raw file

Scan

Method

Score

m/z

Gene names

20140918\_fract2\_dyn\_5ul\_D2\_01\_369

34270

TOF; CID

148.44

1066.07

MED10

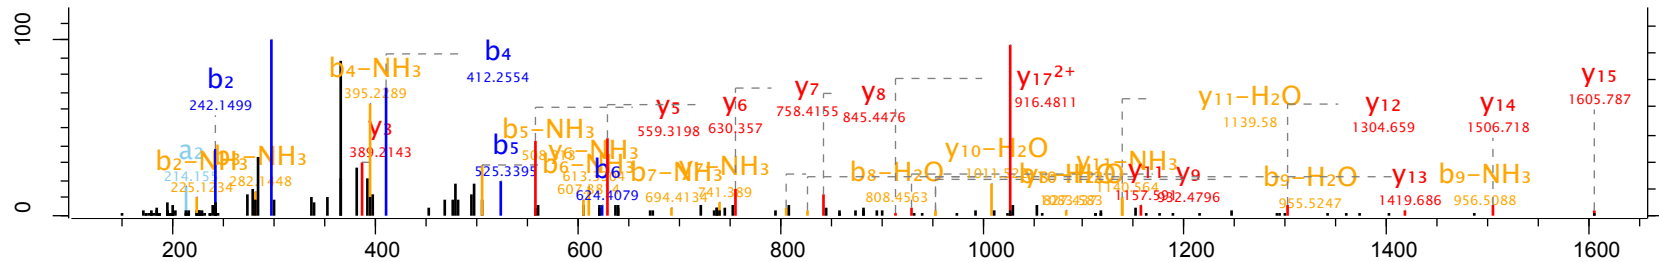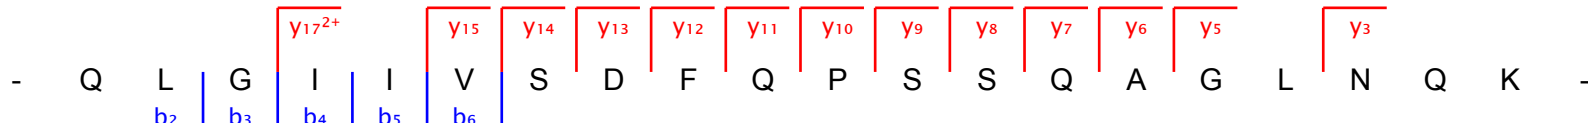

| Raw file                          | Scan  | Method   | Score  | m/z    | Gene names |
|-----------------------------------|-------|----------|--------|--------|------------|
| 20140918_fract2_dyn_5ul_D2_01_369 | 35585 | TOF; CID | 106.68 | 543.82 | NABP1      |

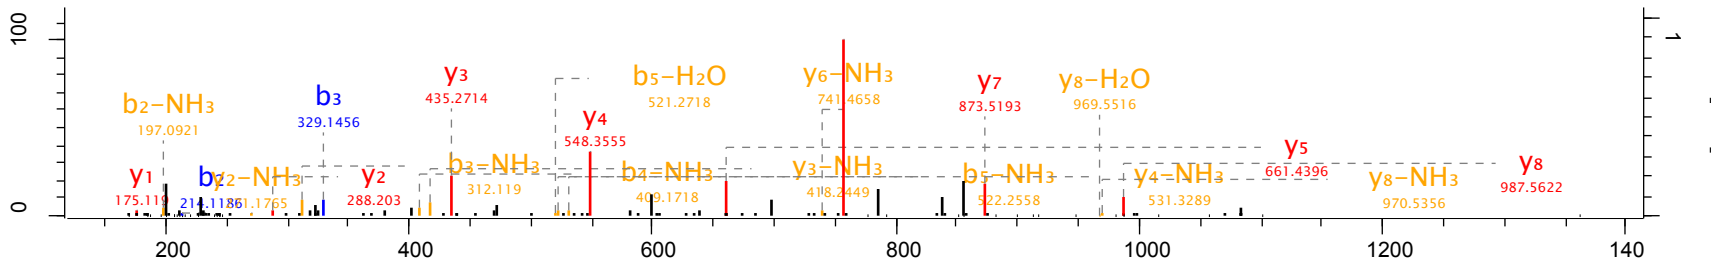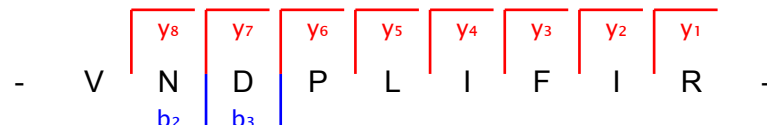

| Raw file                          | Scan  | Method   | Score | m/z   | Gene names |
|-----------------------------------|-------|----------|-------|-------|------------|
| 20140918_fract2_dyn_5ul_D2_01_369 | 35927 | TOF; CID | 88.18 | 530.3 | PHLDA1     |

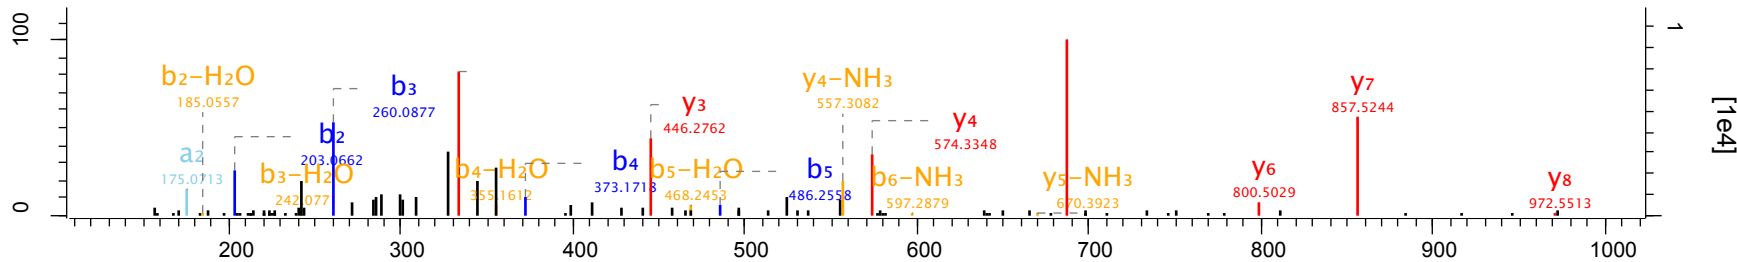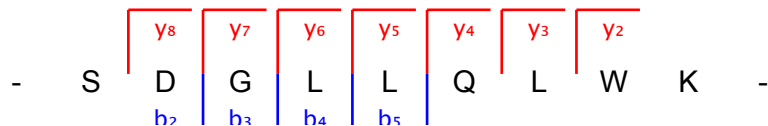

Raw file

20140918\_fract2\_dyn\_5ul\_D2\_01\_369

Scan

41437

Method

TOF; CID

Score

147.64

m/z

1019.55

Gene names

LSM5

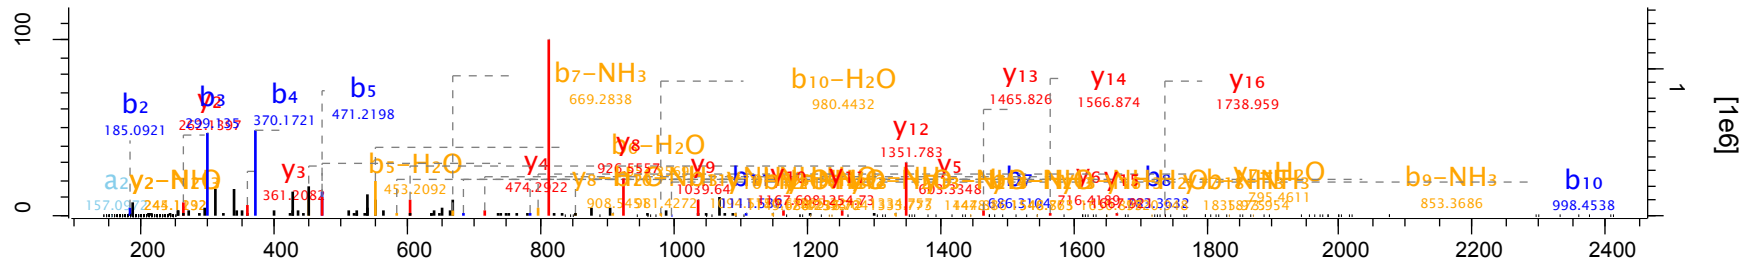

ac

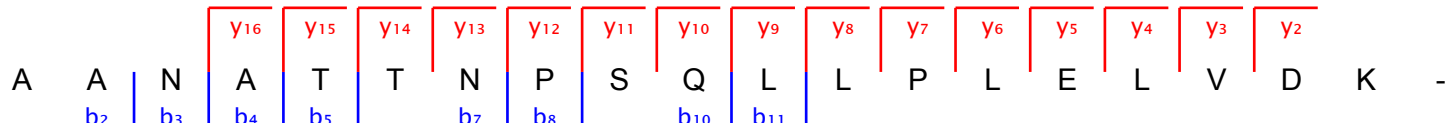

| Raw file                          | Scan | Method   | Score | m/z    | Gene names |
|-----------------------------------|------|----------|-------|--------|------------|
| 20140918_fract3_dyn_5ul_D3_01_370 | 8848 | TOF; CID | 85.74 | 601.29 | C1orf53    |

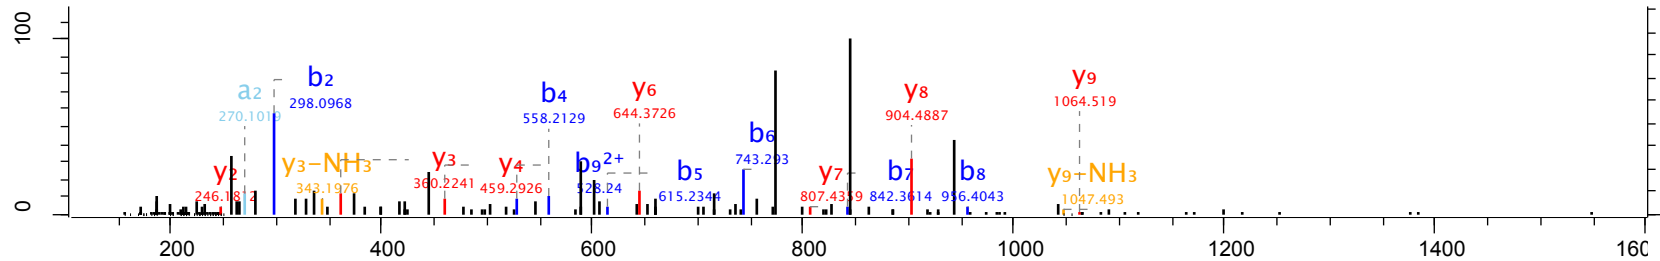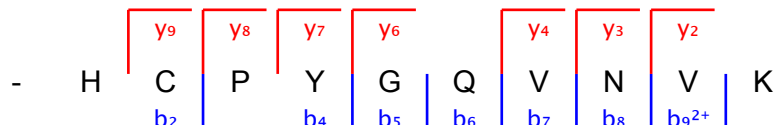

| Raw file                          | Scan  | Method   | Score | m/z    | Gene names |
|-----------------------------------|-------|----------|-------|--------|------------|
| 20140918_fract3_dyn_5ul_D3_01_370 | 11157 | TOF; CID | 99.44 | 483.74 | C10orf54   |

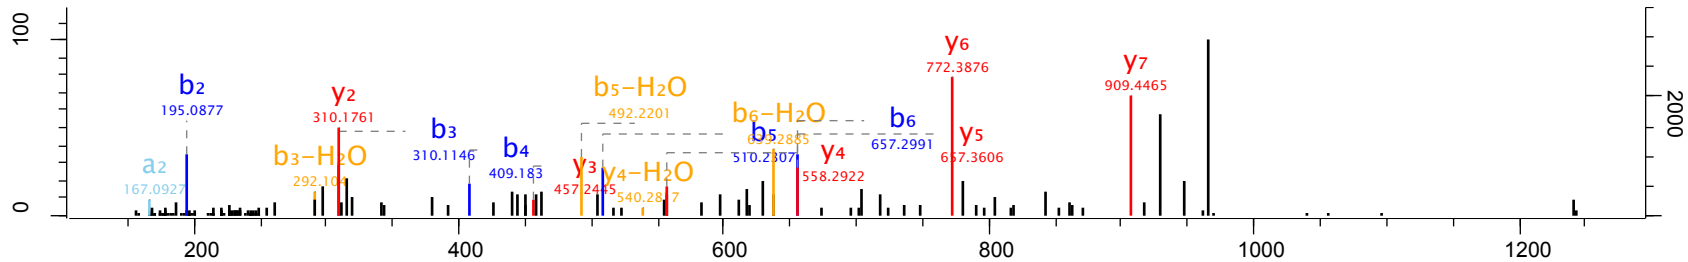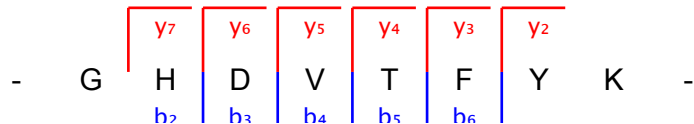

| Raw file                          | Scan  | Method   | Score | m/z    | Gene names |
|-----------------------------------|-------|----------|-------|--------|------------|
| 20140918_fract3_dyn_5ul_D3_01_370 | 12643 | TOF; CID | 39.39 | 627.31 | CYBRD1     |

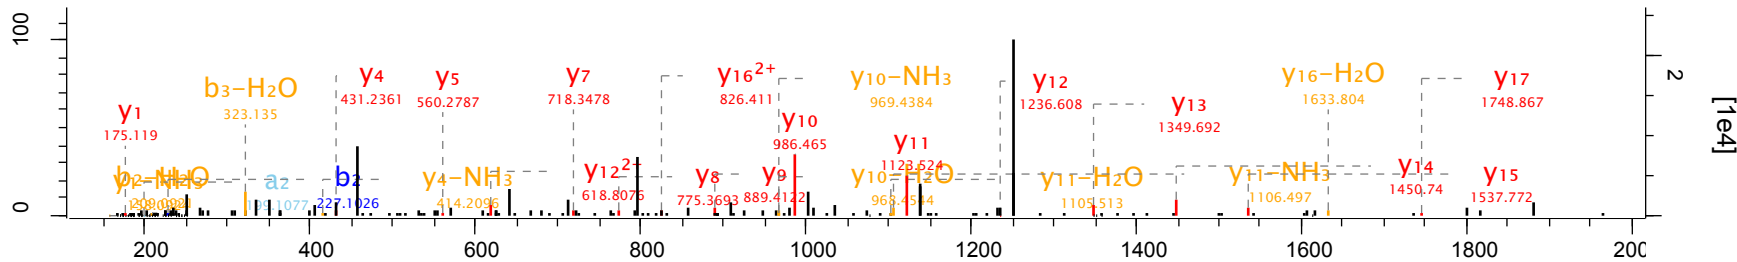

- E P N S T I L H P N G G T E Q G A R -  
 b<sub>2</sub>

y17 y16<sup>2+</sup> y15 y14 y13 y12 y11 y10 y9 y8 y7 y5 y4 y1

| Raw file                          | Scan  | Method   | Score | m/z    | Gene names |
|-----------------------------------|-------|----------|-------|--------|------------|
| 20140918_fract3_dyn_5ul_D3_01_370 | 12893 | TOF; CID | 63.08 | 582.78 | CCDC151    |

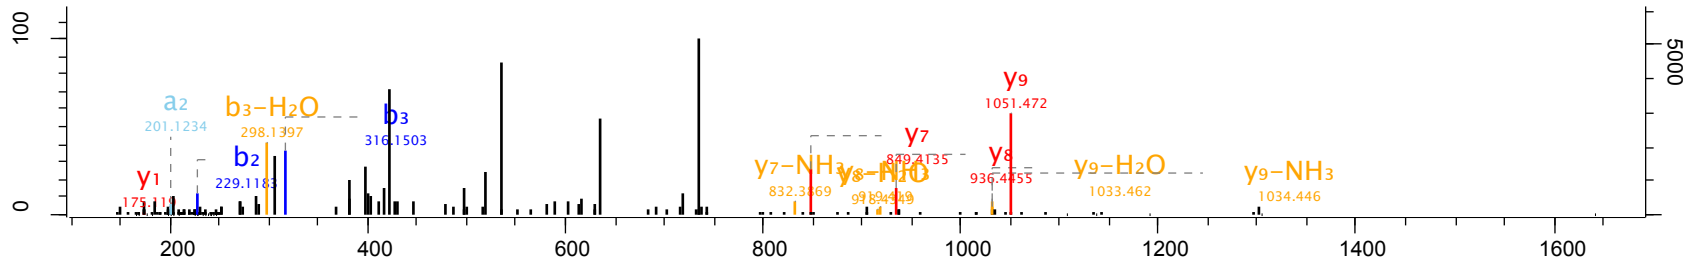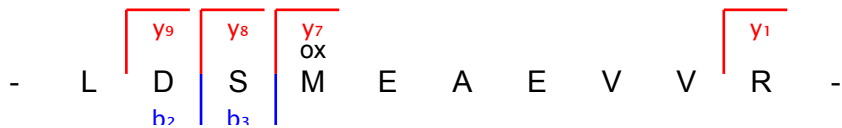



Raw file

20140918\_fract3\_dyn\_5ul\_D3\_01\_370

Scan

14690

Method

TOF; CID

Score

114.76

m/z

630.83

Gene names

TFDP2

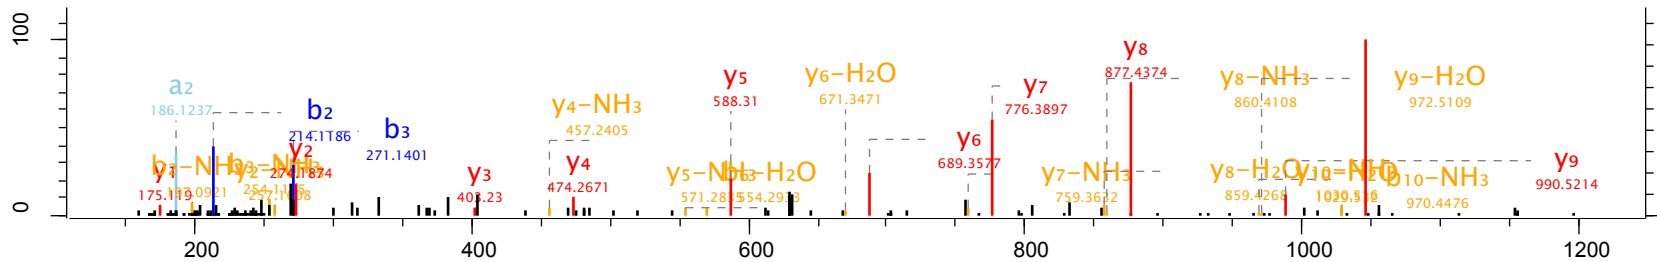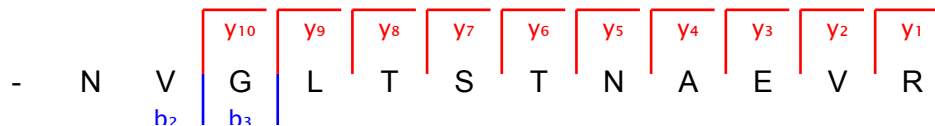

Raw file

20140918\_fract3\_dyn\_5ul\_D3\_01\_370

Scan

15091

Method

TOF; CID

Score

78.9

m/z

469.58

Gene names

TMEM208

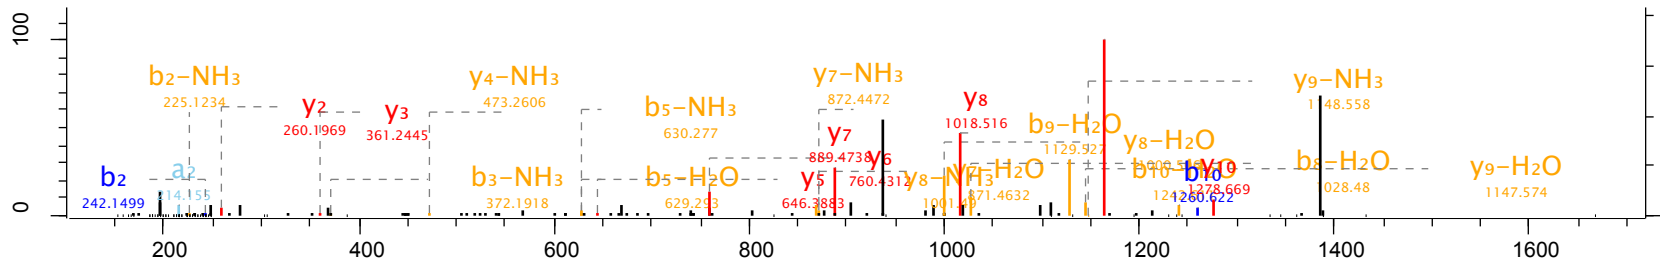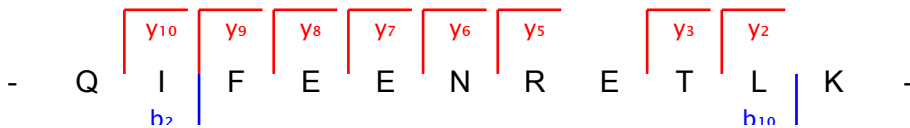

Raw file

20140918\_fract3\_dyn\_5ul\_D3\_01\_370

Scan

16503

Method

TOF; CID

Score

112.64

m/z

592.8

Gene names

MFSD1

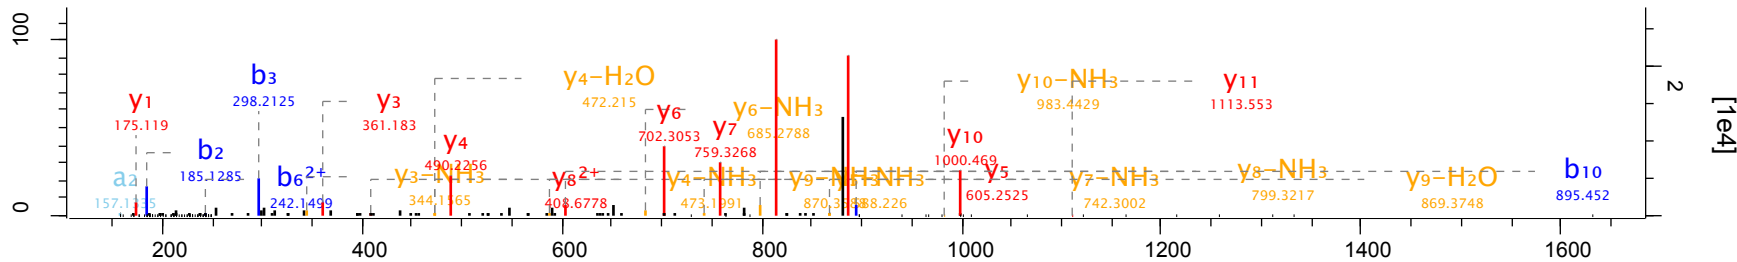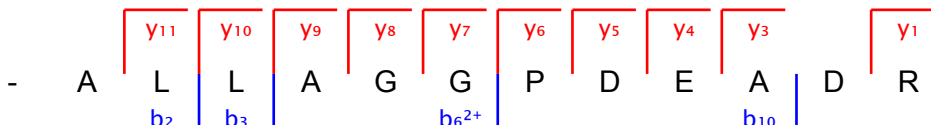

| Raw file                          | Scan  | Method   | Score  | m/z    | Gene names |
|-----------------------------------|-------|----------|--------|--------|------------|
| 20140918_fract3_dyn_5ul_D3_01_370 | 17243 | TOF; CID | 109.71 | 483.72 | TMEM258    |

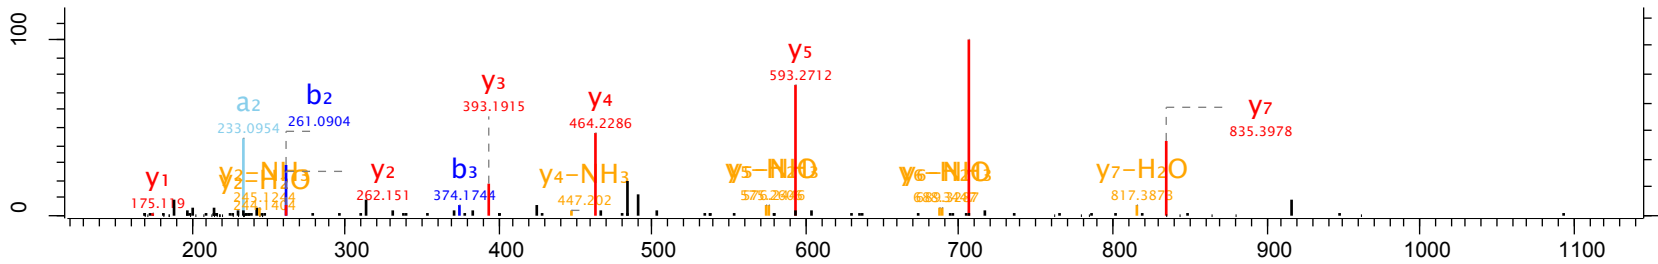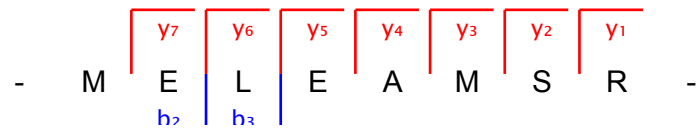

Raw file

20140918\_fract3\_dyn\_5ul\_D3\_01\_370

Scan

18788

Method

TOF; CID

Score

136.81

m/z

858.93

Gene names

APOC3

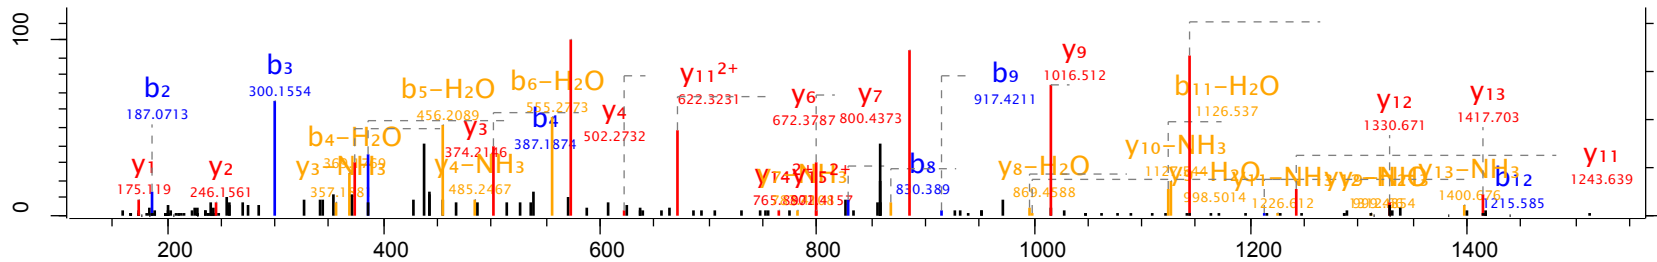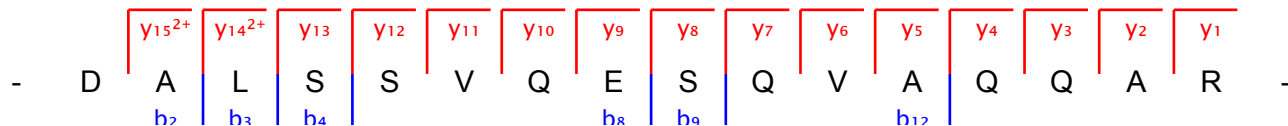

| Raw file                          | Scan  | Method   | Score | m/z   | Gene names |
|-----------------------------------|-------|----------|-------|-------|------------|
| 20140918_fract3_dyn_5ul_D3_01_370 | 24078 | TOF; CID | 76.23 | 546.3 | SIAH2      |

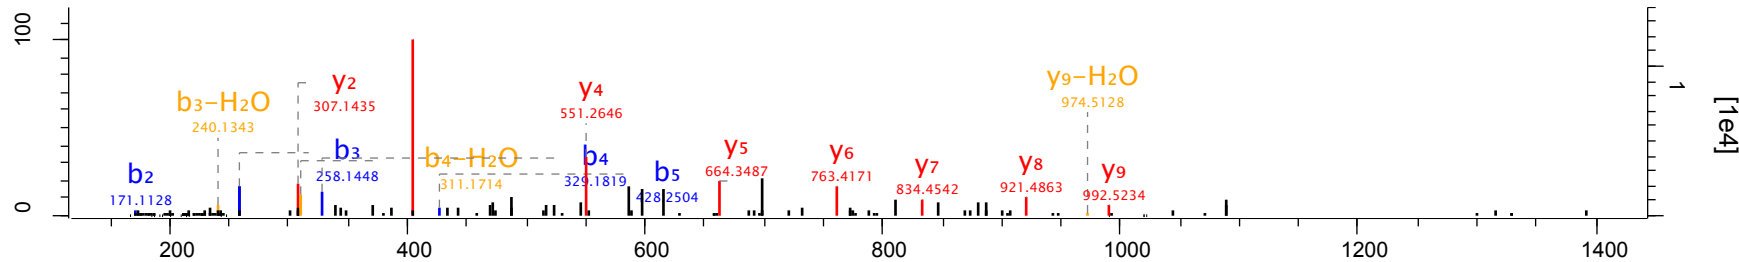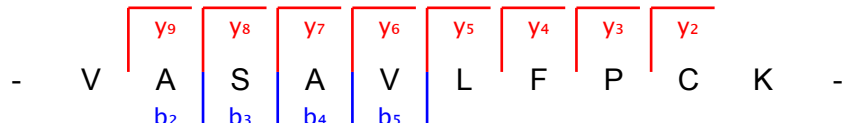

Raw file

20140918\_fract3\_dyn\_5ul\_D3\_01\_370

Scan

24381

Method

TOF; CID

Score

93.65

m/z

553.32

Gene names

WBP5

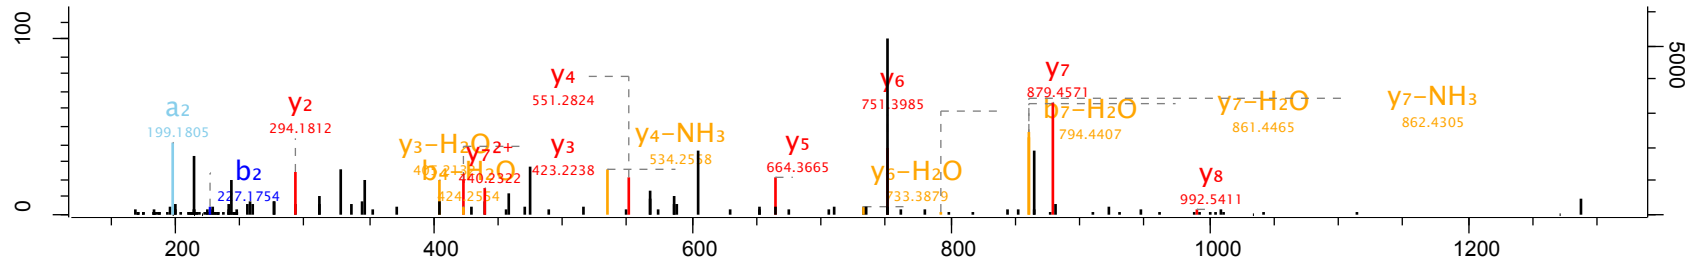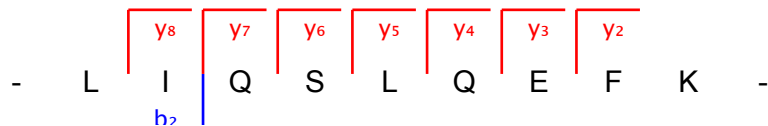

Raw file

20140918\_fract3\_dyn\_5ul\_D3\_01\_370

Scan

26934

Method

TOF; CID

Score

78.95

m/z

578.3

Gene names

MBLAC1

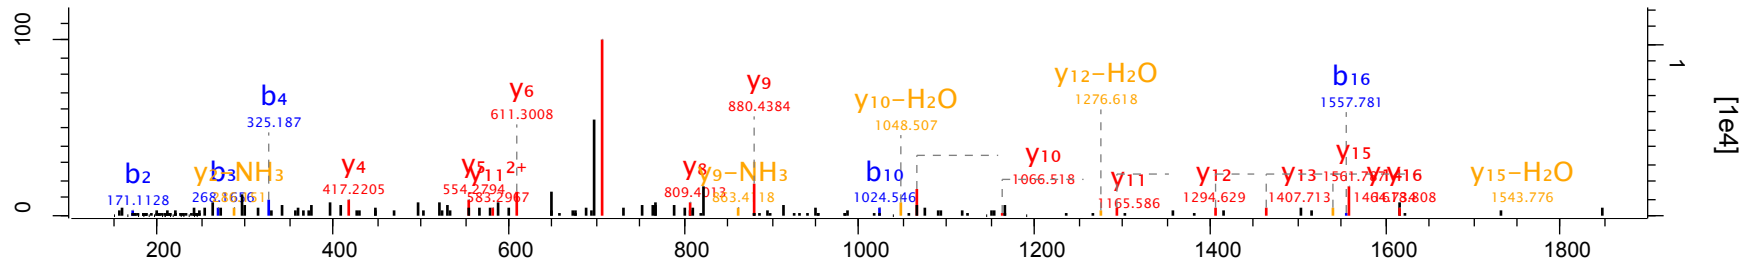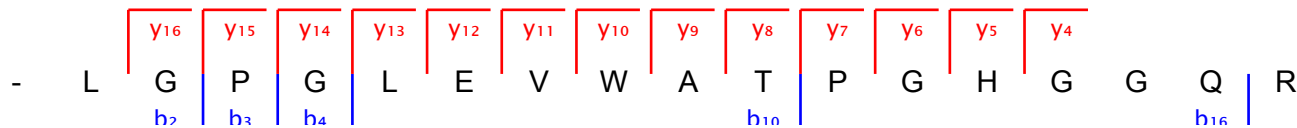



| Raw file                          | Scan  | Method   | Score | m/z    | Gene names |
|-----------------------------------|-------|----------|-------|--------|------------|
| 20140918_fract3_dyn_5ul_D3_01_370 | 27345 | TOF; CID | 89.3  | 586.84 | KATNAL2    |

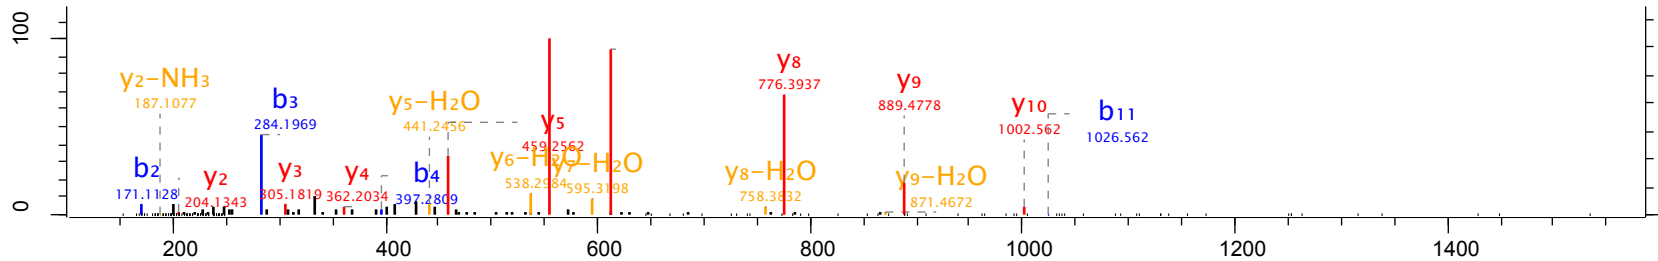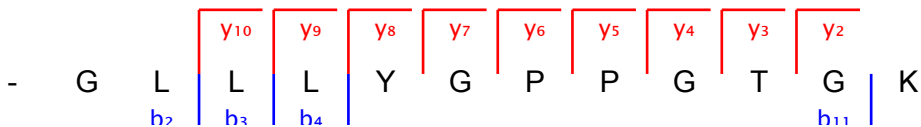

[1e4]

Raw file

20140918\_fract3\_dyn\_5ul\_D3\_01\_370

Scan

28210

Method

TOF; CID

Score

84.17

m/z

727.38

Gene names

NUDT14

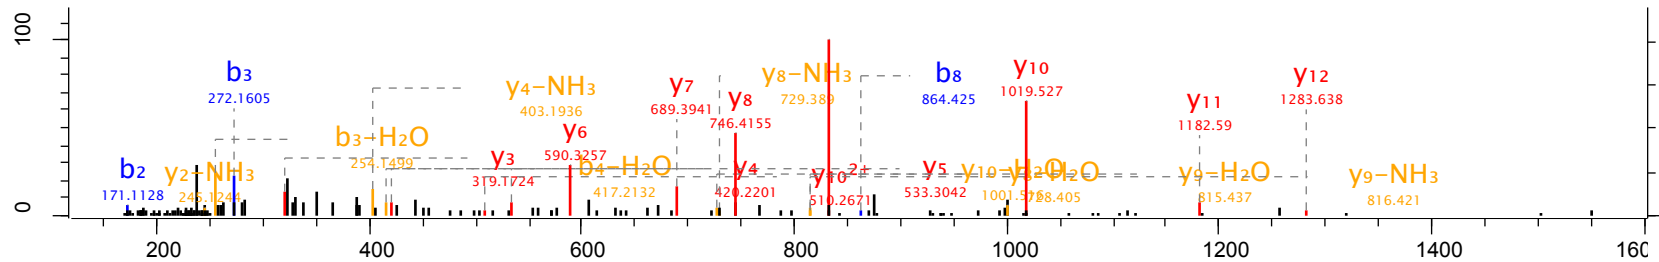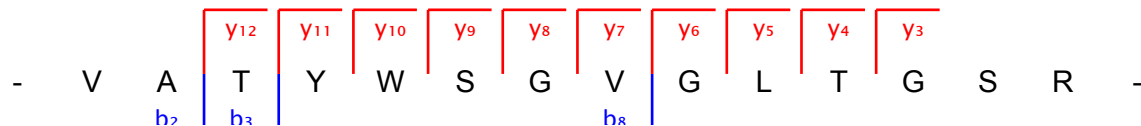

Raw file

20140918\_fract3\_dyn\_5ul\_D3\_01\_370

Scan

32988

Method

TOF; CID

Score

84.65

m/z

996.92

Gene names

CLDN7

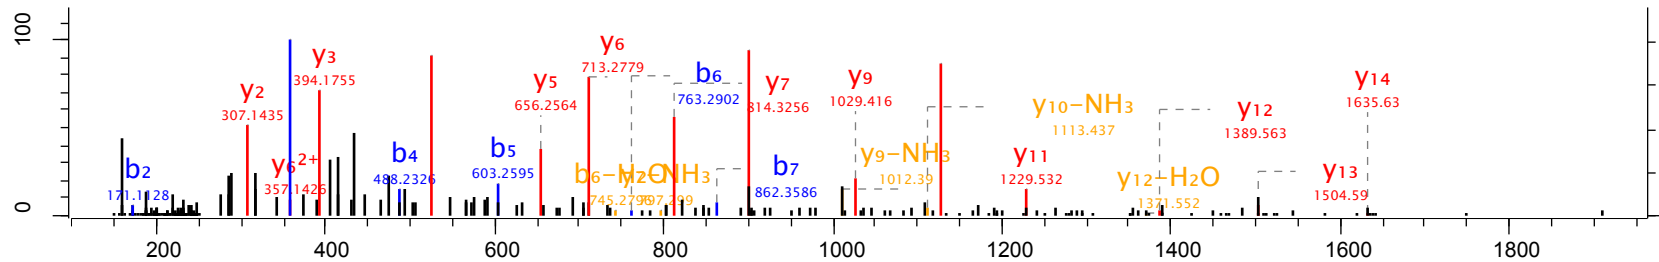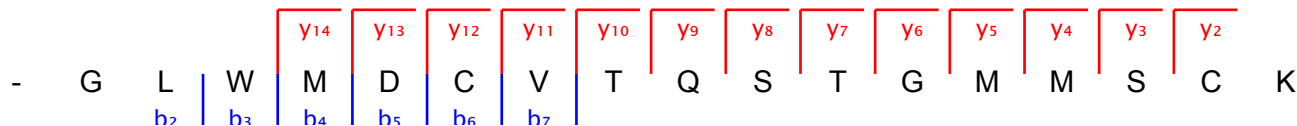

Raw file

20140918\_fract3\_dyn\_5ul\_D3\_01\_370

Scan

33706

Method

TOF; CID

Score

99.07

m/z

854.42

Gene names

SSR3

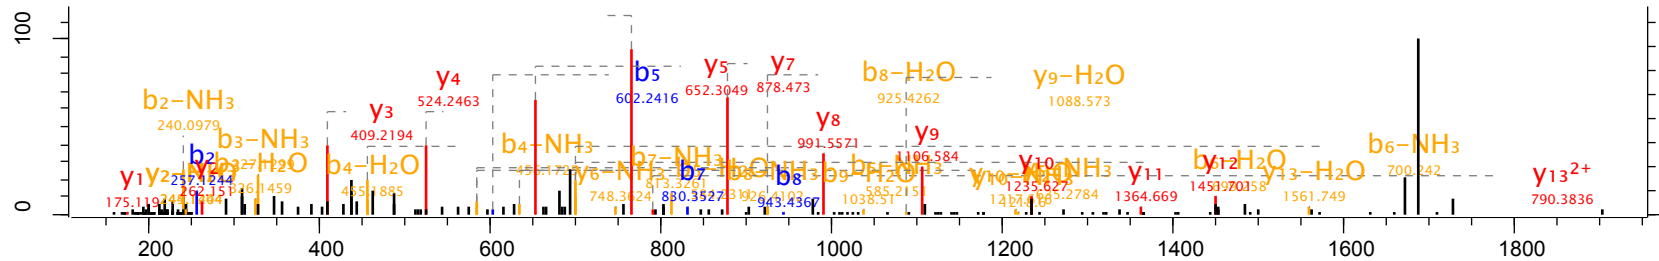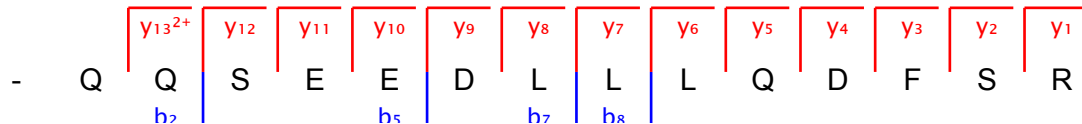

Raw file

20140918\_fract3\_dyn\_5ul\_D3\_01\_370

Scan

34784

Method

TOF; CID

Score

71.67

m/z

1169.23

Gene names

TAF11

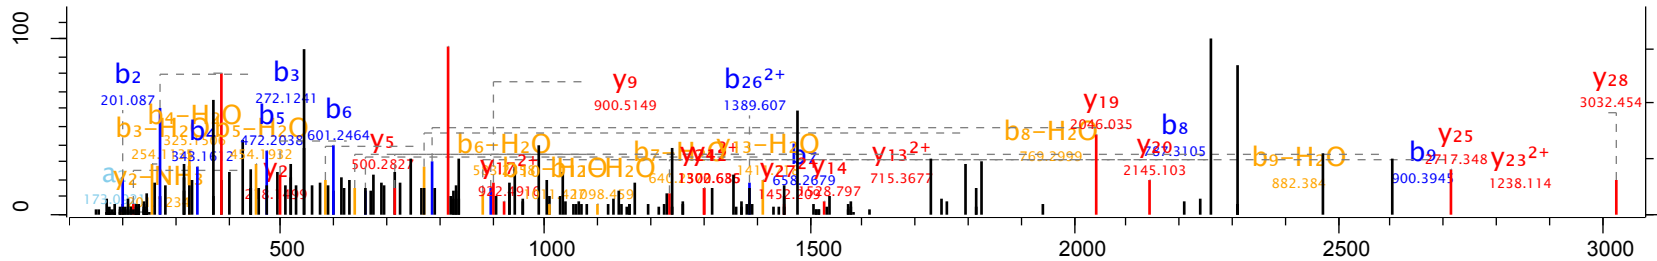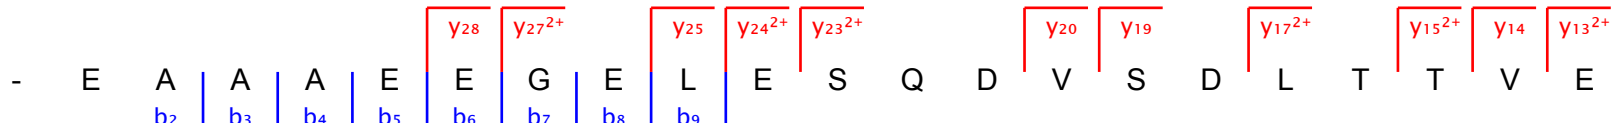

| Raw file                          | Scan  | Method   | Score  | m/z   | Gene names |
|-----------------------------------|-------|----------|--------|-------|------------|
| 20140918_fract3_dyn_5ul_D3_01_370 | 35999 | TOF; CID | 113.71 | 568.8 | MT-ND2     |

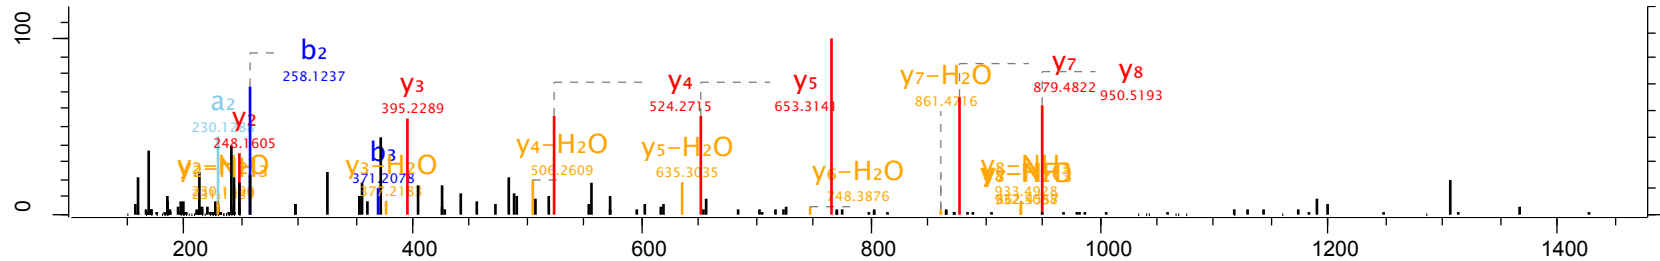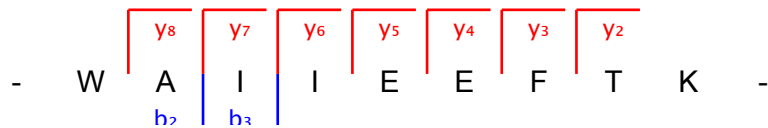

Raw file

20140918\_fract3\_dyn\_5ul\_D3\_01\_370

Scan

39602

Method

TOF; CID

Score

89.62

m/z

858.4

Gene names

SLC29A2

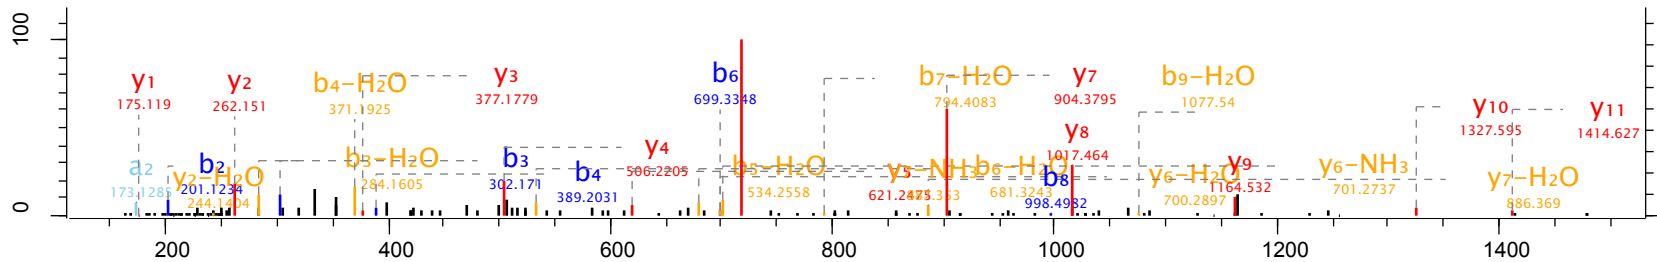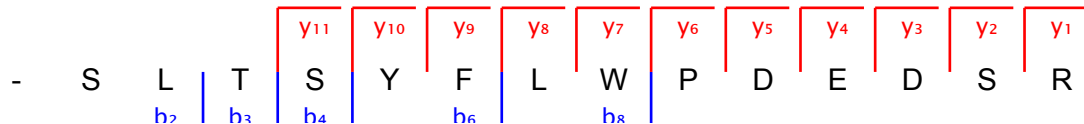

Raw file

Scan

Method

Score

m/z

Gene names

20140918\_fract4\_dyn\_5ul\_D4\_01\_371

5976

TOF; CID

83.86

564.78

TET2

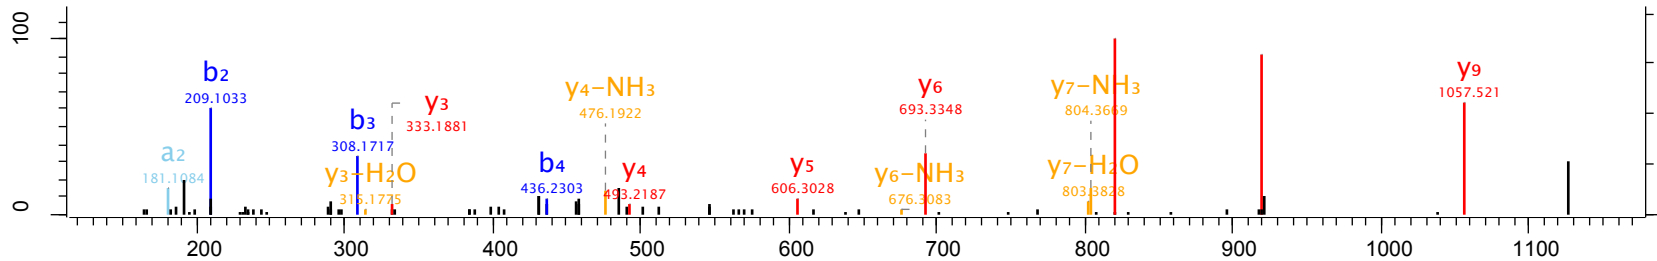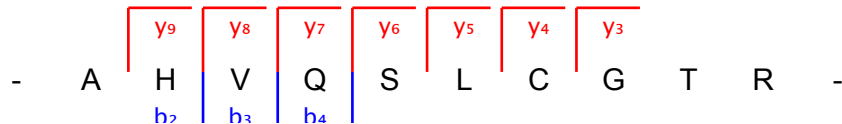



Raw file

20140918\_fract4\_dyn\_5ul\_D4\_01\_371

Scan

7729

Method

TOF; CID

Score

109.48

m/z

476.77

Gene names

ENTPD7

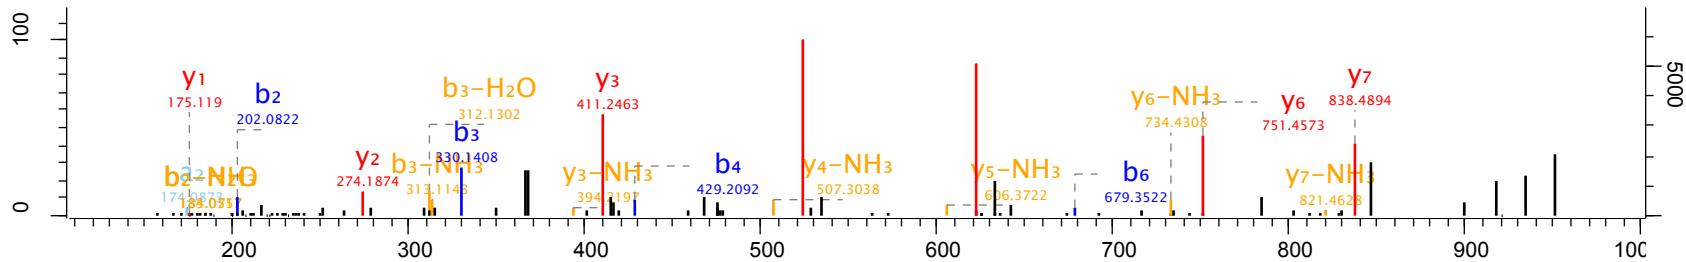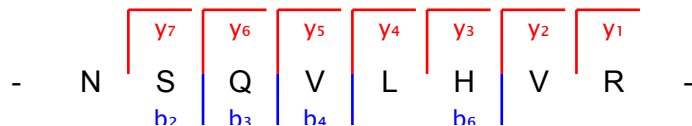

Raw file

Scan

Method

Score

m/z

Gene names

20140918\_fract4\_dyn\_5ul\_D4\_01\_371

8161

TOF; CID

100.11

735.37

RWDD3

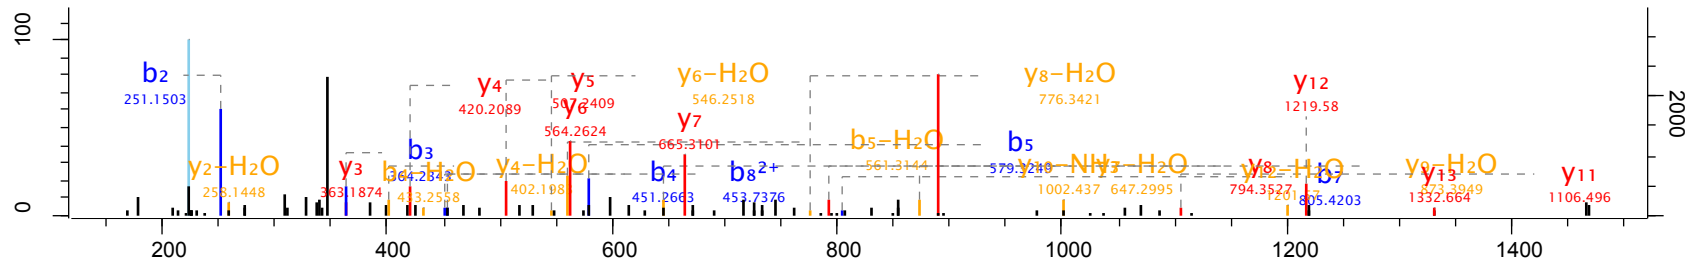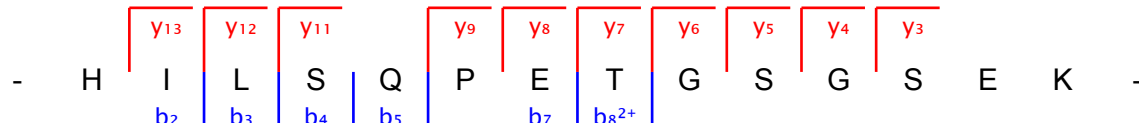

Raw file

20140918\_fract4\_dyn\_5ul\_D4\_01\_371

Scan

8232

Method

TOF; CID

Score

124.89

m/z

454.23

Gene names

KIAA2026

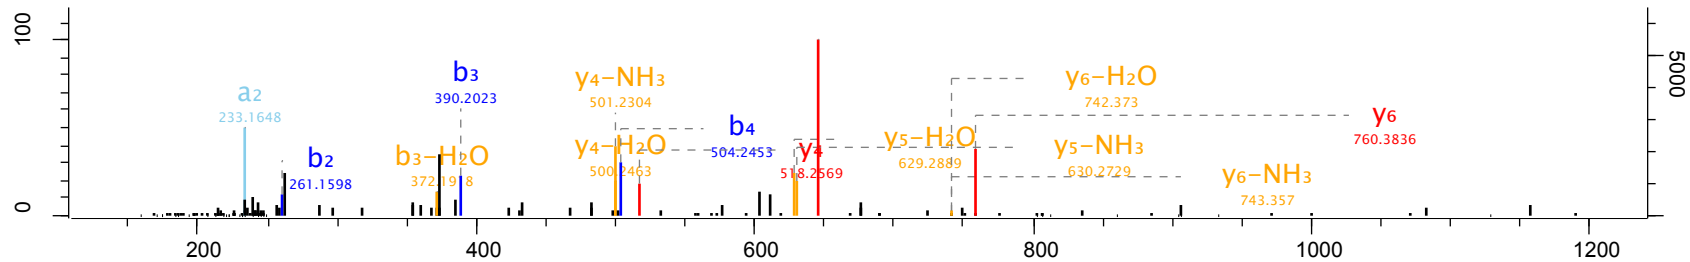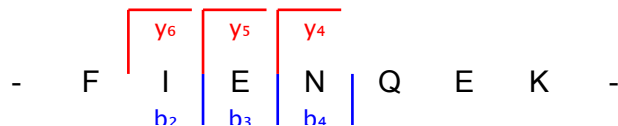

Raw file

20140918\_fract4\_dyn\_5ul\_D4\_01\_371

Scan

8826

Method

TOF; CID

Score

90.79

m/z

464.54

Gene names

DPM3

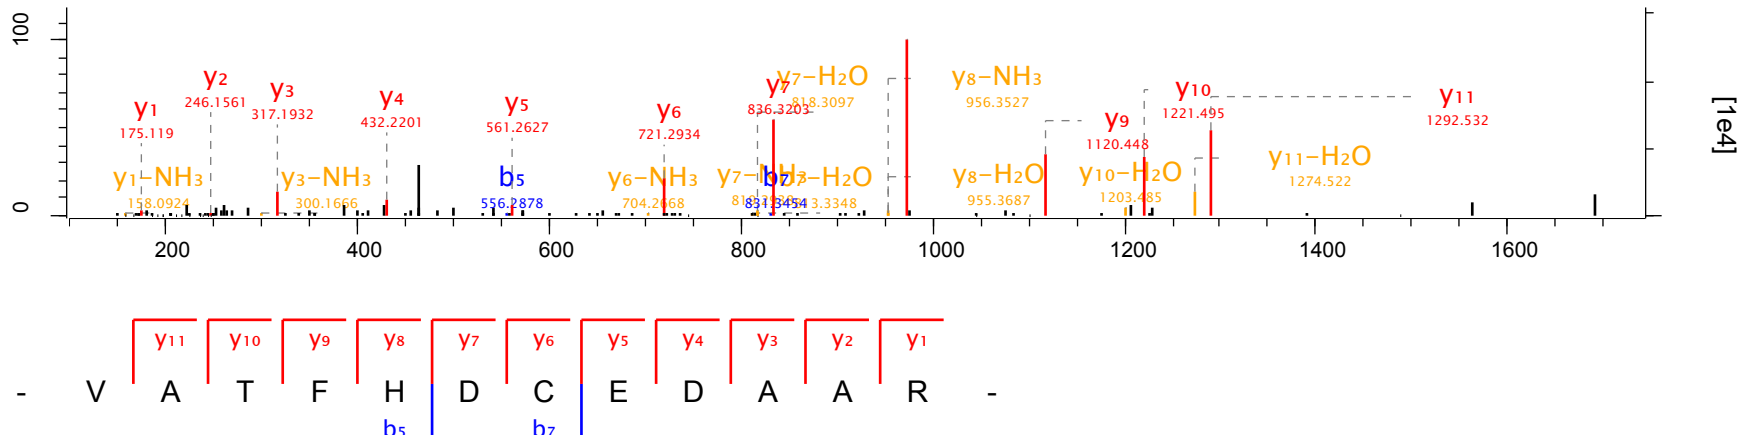

Raw file

20140918\_fract4\_dyn\_5ul\_D4\_01\_371

Scan

11863

Method

TOF; CID

Score

45.62

m/z

684.85

Gene names

ZXDA;ZXDB

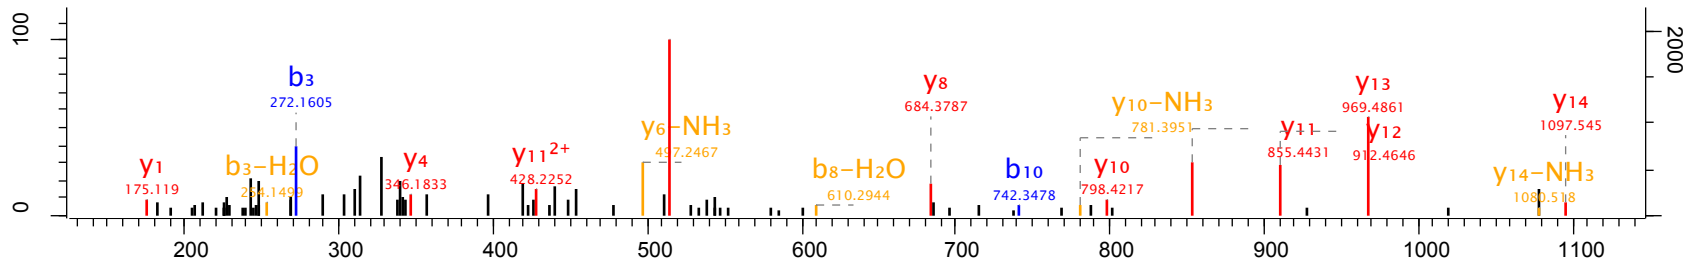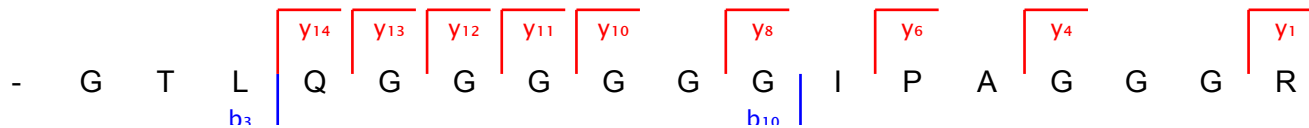

Raw file

20140918\_fract4\_dyn\_5ul\_D4\_01\_371

Scan

13366

Method

TOF; CID

Score

151.98

m/z

459.56

Gene names

CYB561D2

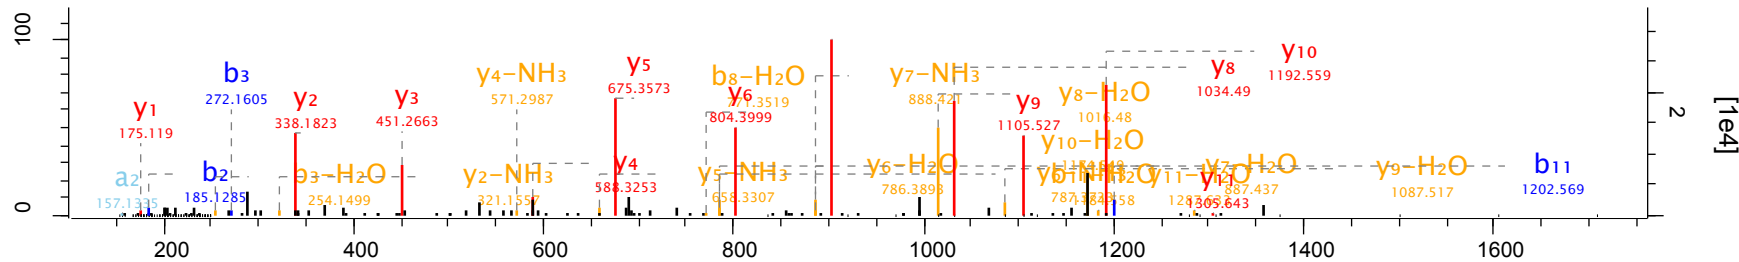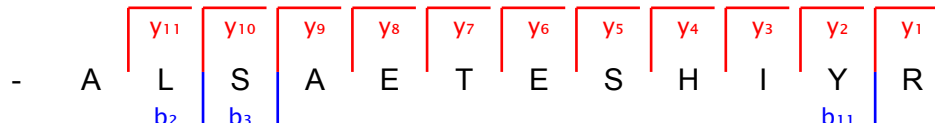

| Raw file                          | Scan  | Method   | Score | m/z    | Gene names       |
|-----------------------------------|-------|----------|-------|--------|------------------|
| 20140918_fract4_dyn_5ul_D4_01_371 | 13525 | TOF; CID | 93.84 | 577.32 | PLEKHG4;CYB561A3 |

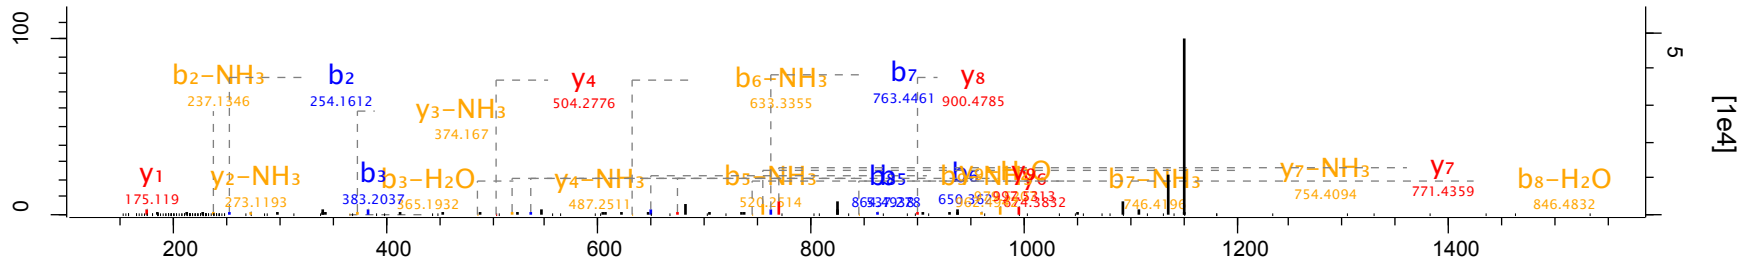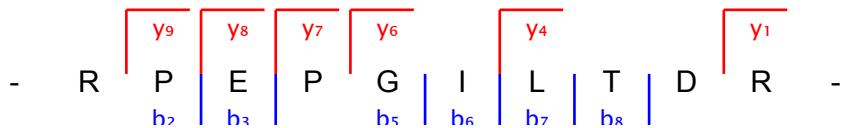

| Raw file                          | Scan  | Method   | Score | m/z    | Gene names |
|-----------------------------------|-------|----------|-------|--------|------------|
| 20140918_fract4_dyn_5ul_D4_01_371 | 17049 | TOF; CID | 58.32 | 779.34 | ATG14      |

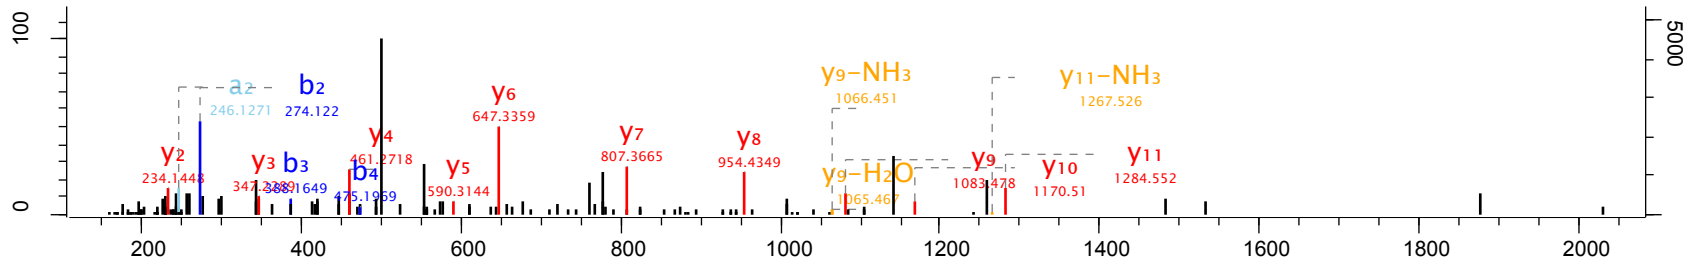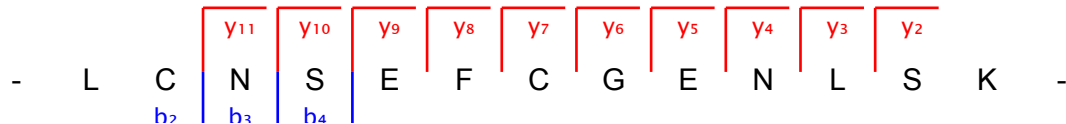



Raw file

20140918\_fract4\_dyn\_5ul\_D4\_01\_371

Scan

19402

Method

TOF; CID

Score

53.56

m/z

734.85

Gene names

CYLC1

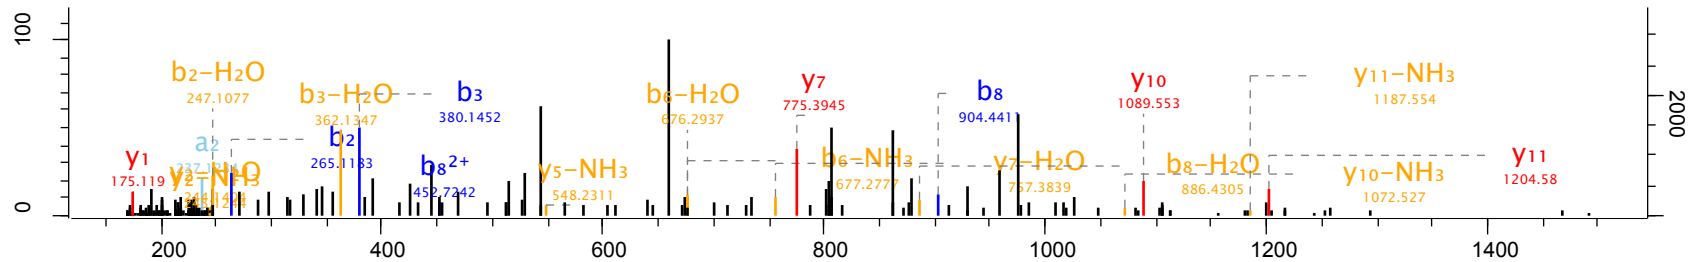

- T Y D N S I P I S E S S R -

b<sub>2</sub> b<sub>3</sub> b<sub>8</sub> y<sub>11</sub> y<sub>10</sub> y<sub>7</sub> y<sub>1</sub>

| Raw file                          | Scan  | Method   | Score | m/z    | Gene names |
|-----------------------------------|-------|----------|-------|--------|------------|
| 20140918_fract4_dyn_5ul_D4_01_371 | 19940 | TOF; CID | 64.1  | 650.82 | SLC36A4    |

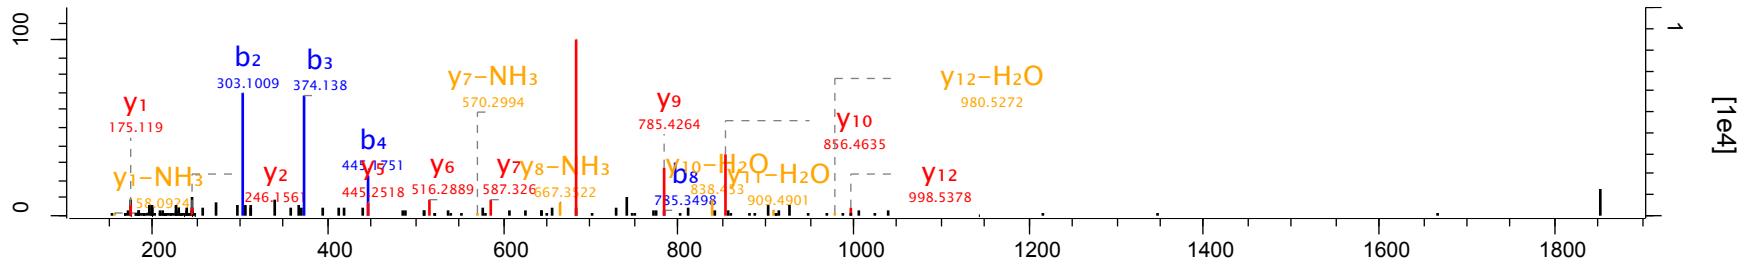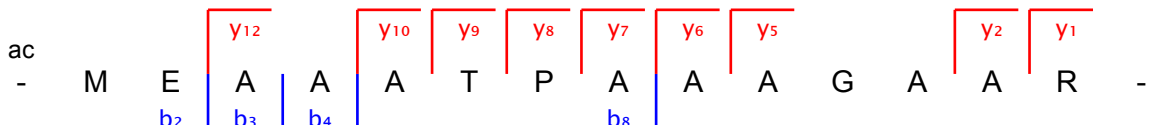

Raw file

20140918\_fract4\_dyn\_5ul\_D4\_01\_371

Scan

21822

Method

TOF; CID

Score

117.48

m/z

610.32

Gene names

FAM110A

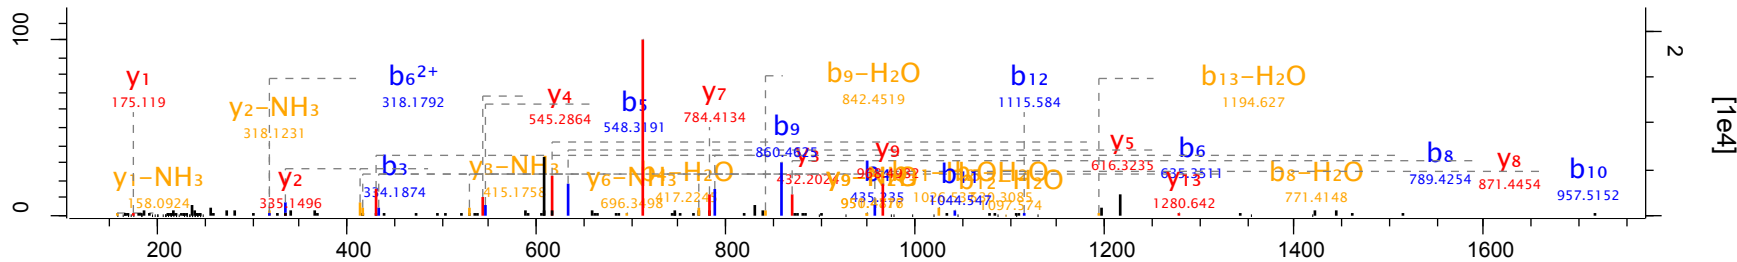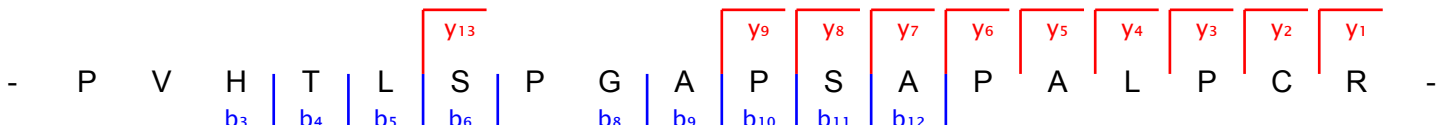

Raw file

20140918\_fract4\_dyn\_5ul\_D4\_01\_371

Scan

22016

Method

TOF; CID

Score

119.87

m/z

532.62

Gene names

SOCS3

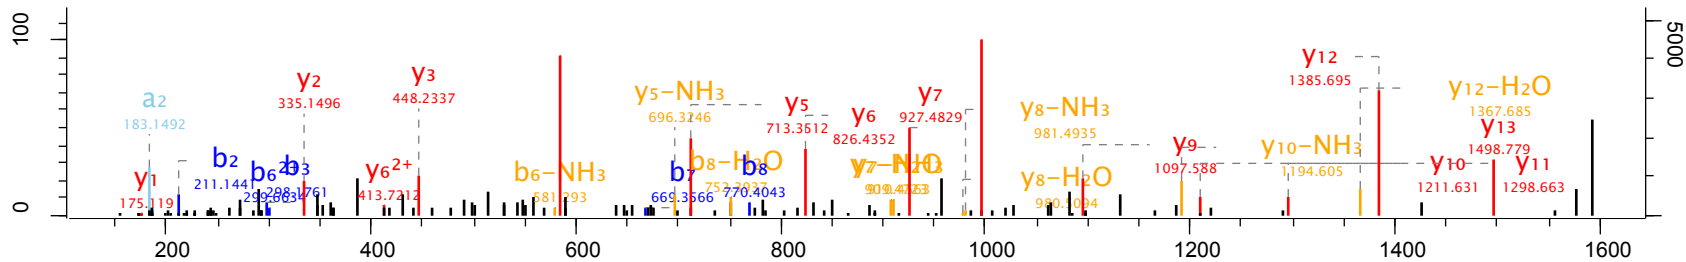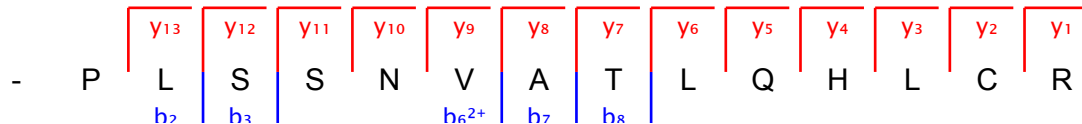

| Raw file                          | Scan  | Method   | Score  | m/z    | Gene names |
|-----------------------------------|-------|----------|--------|--------|------------|
| 20140918_fract4_dyn_5ul_D4_01_371 | 24299 | TOF; CID | 100.74 | 420.23 | SMDT1      |

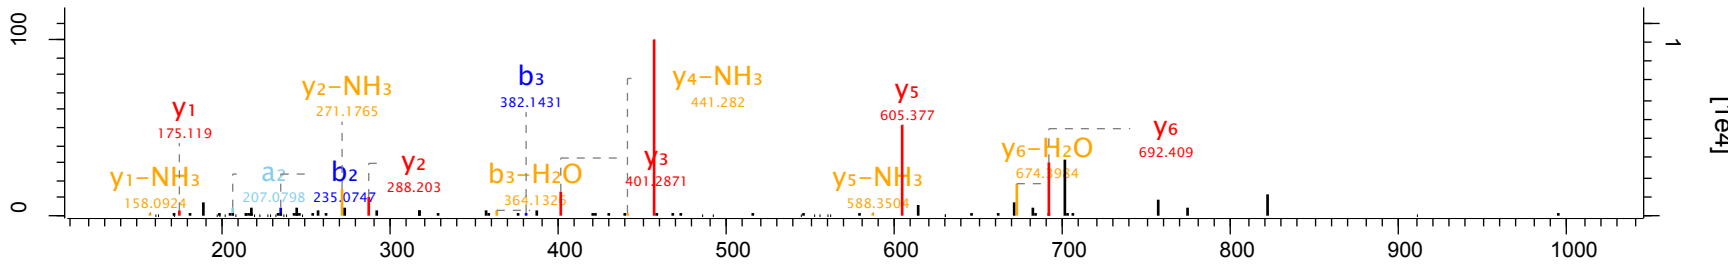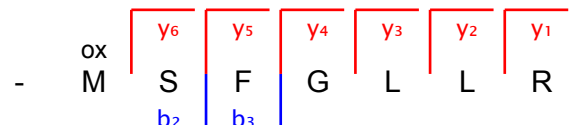

Raw file

20140918\_fract4\_dyn\_5ul\_D4\_01\_371

Scan

26213

Method

TOF; CID

Score

141.55

m/z

959.96

Gene names

DSCR3

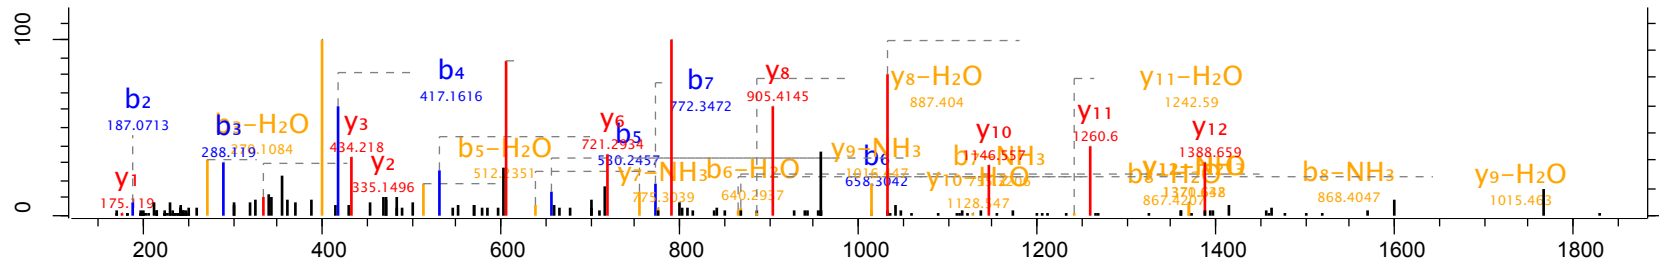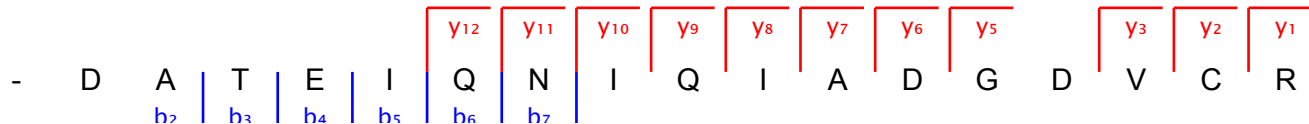

| Raw file                          | Scan  | Method   | Score | m/z    | Gene names |
|-----------------------------------|-------|----------|-------|--------|------------|
| 20140918_fract4_dyn_5ul_D4_01_371 | 27437 | TOF; CID | 77.75 | 855.39 | METTL7B    |

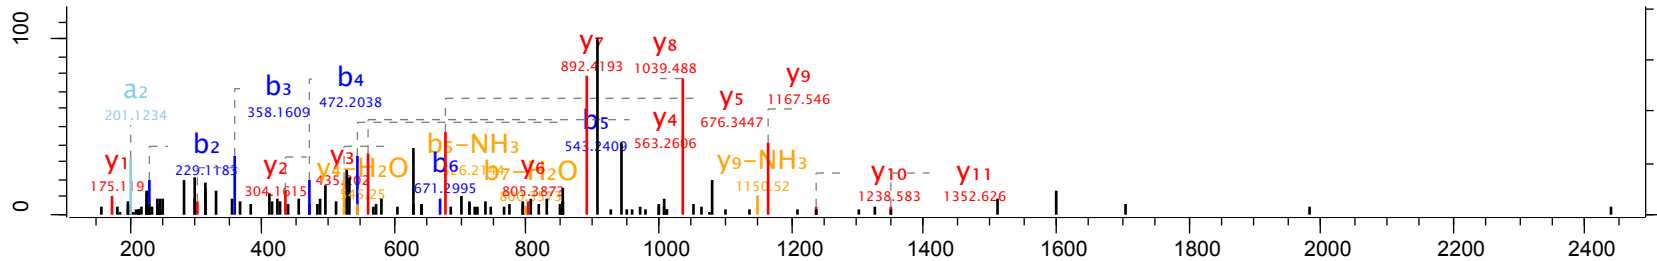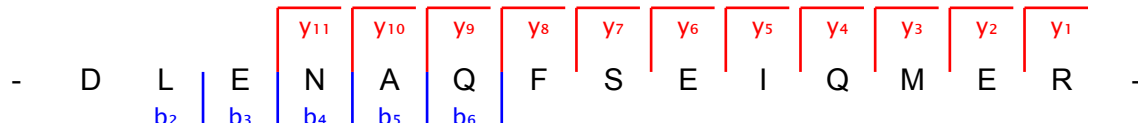

Raw file

20140918\_fract4\_dyn\_5ul\_D4\_01\_371

Scan

30094

Method

TOF; CID

Score

155.92

m/z

723.7

Gene names

LMBRD1

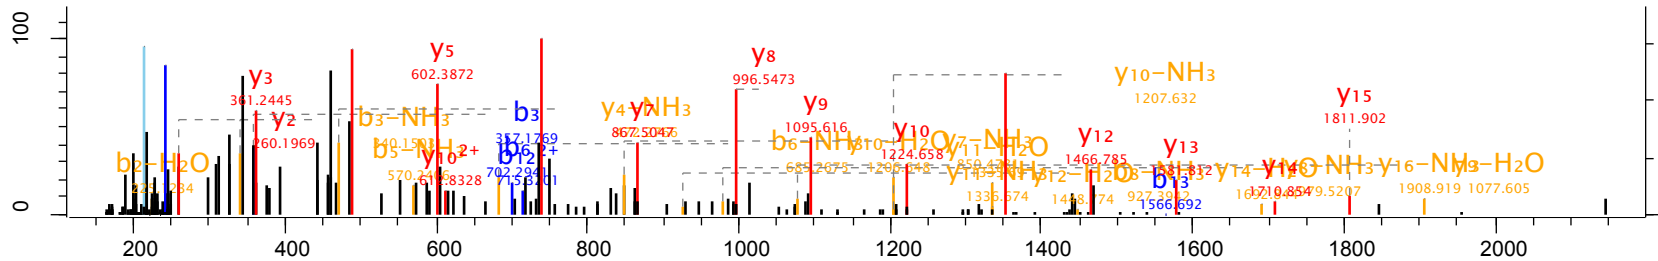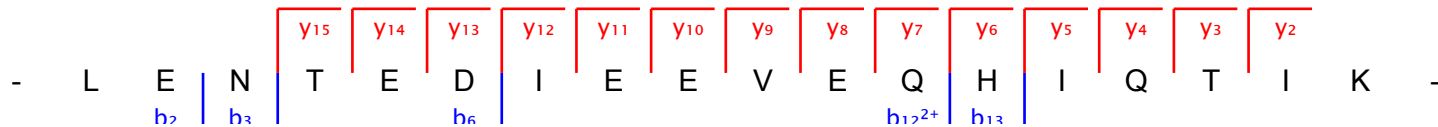



| Raw file                          | Scan  | Method   | Score | m/z    | Gene names |
|-----------------------------------|-------|----------|-------|--------|------------|
| 20140918_fract4_dyn_5ul_D4_01_371 | 30714 | TOF; CID | 68.04 | 740.89 | TMEM219    |

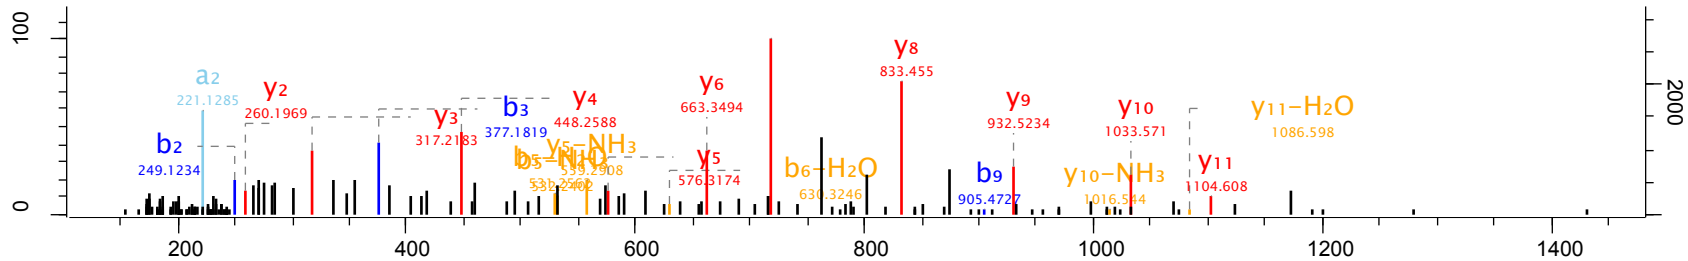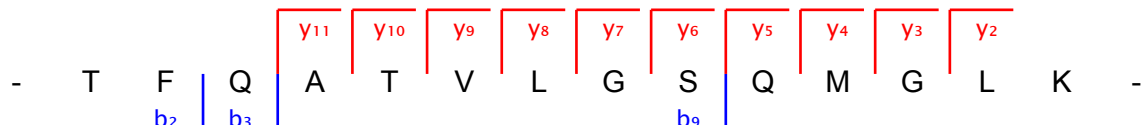

| Raw file                          | Scan  | Method   | Score | m/z    | Gene names |
|-----------------------------------|-------|----------|-------|--------|------------|
| 20140918_fract4_dyn_5ul_D4_01_371 | 32344 | TOF; CID | 66.83 | 668.65 | PERP       |

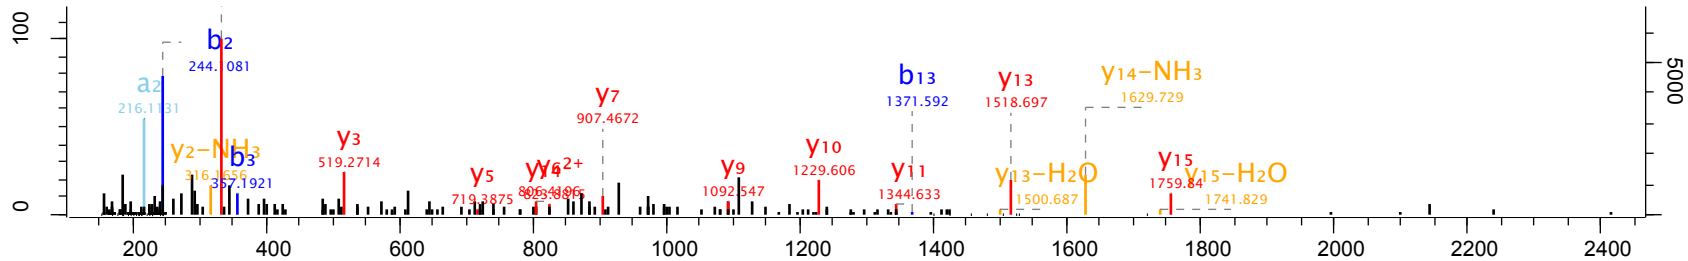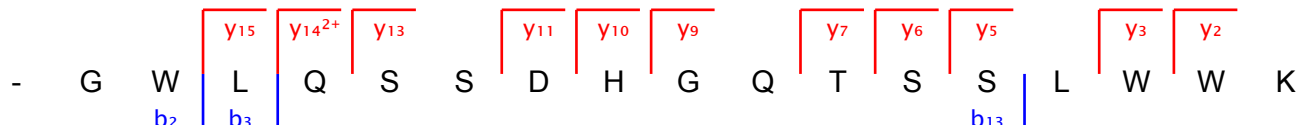

Raw file

20140918\_fract4\_dyn\_5ul\_D4\_01\_371

Scan

37863

Method

TOF; CID

Score

70.27

m/z

773.91

Gene names

DEPDC1B

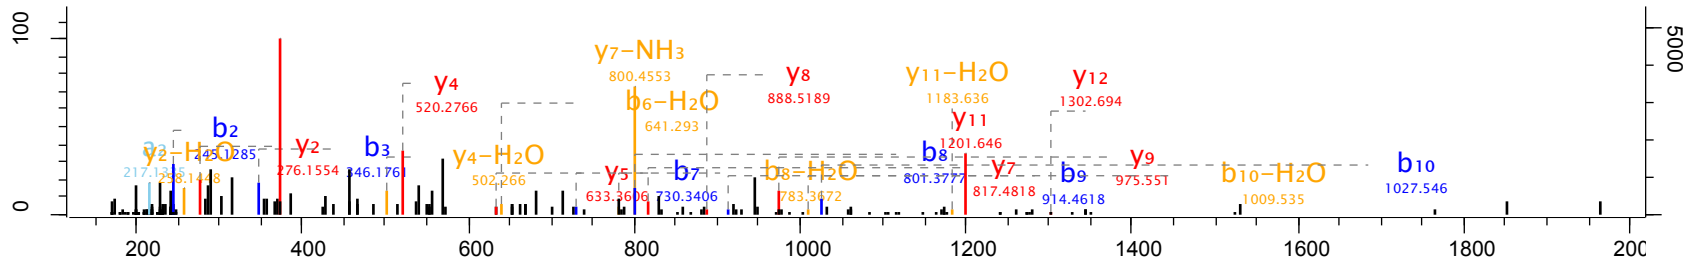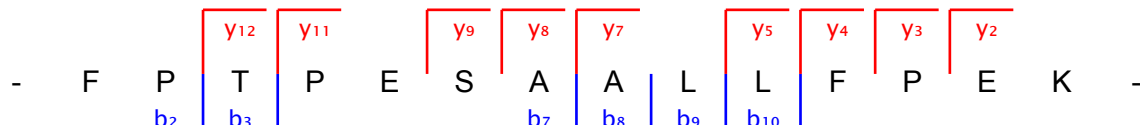

Raw file

20140918\_fract4\_dyn\_5ul\_D4\_01\_371

Scan

38454

Method

TOF; CID

Score

141.58

m/z

797.94

Gene names

CLDN12

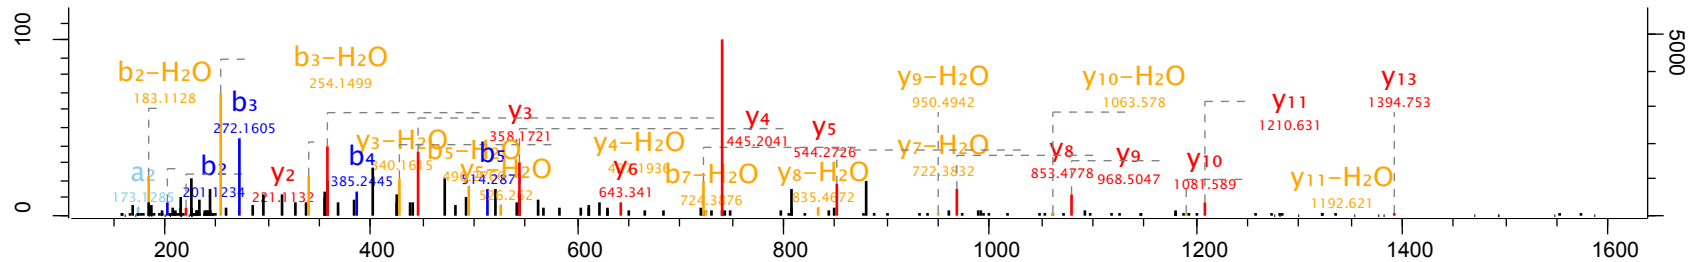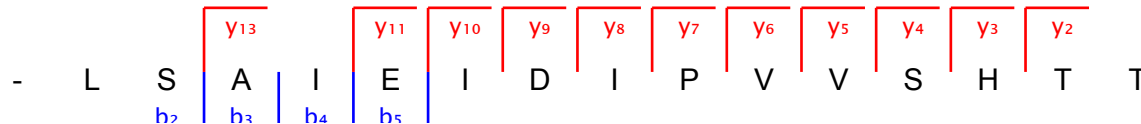

| Raw file                          | Scan  | Method   | Score | m/z    | Gene names |
|-----------------------------------|-------|----------|-------|--------|------------|
| 20140918_fract4_dyn_5ul_D4_01_371 | 39129 | TOF; CID | 68.24 | 971.02 | GINM1      |

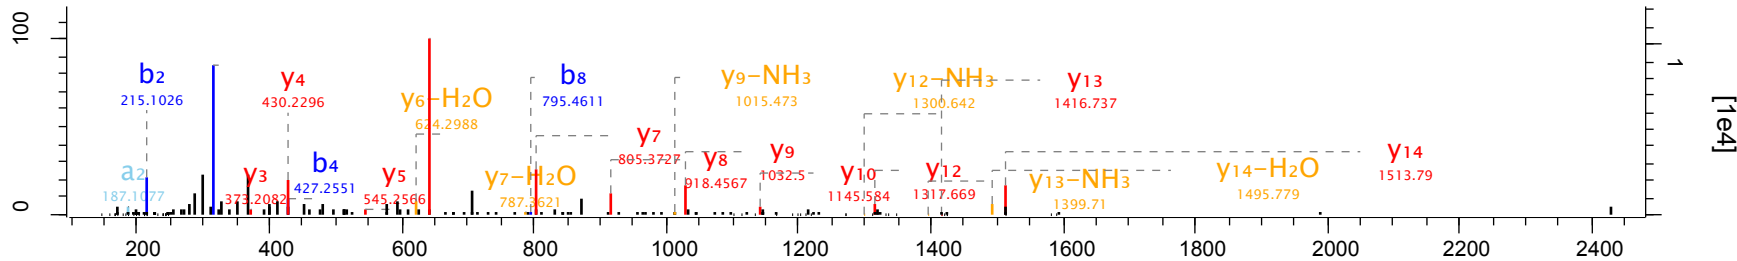

- V D V I P V T A I N L Y P D G P E K -  
   b<sub>2</sub> b<sub>3</sub> b<sub>4</sub> b<sub>8</sub> y<sub>14</sub> y<sub>13</sub> y<sub>12</sub> y<sub>10</sub> y<sub>9</sub> y<sub>8</sub> y<sub>7</sub> y<sub>6</sub> y<sub>5</sub> y<sub>4</sub> y<sub>3</sub>

| Raw file                          | Scan | Method   | Score  | m/z    | Gene names |
|-----------------------------------|------|----------|--------|--------|------------|
| 20140918_fract5_dyn_5ul_D5_01_372 | 5109 | TOF; CID | 110.53 | 421.21 | FAM104A    |

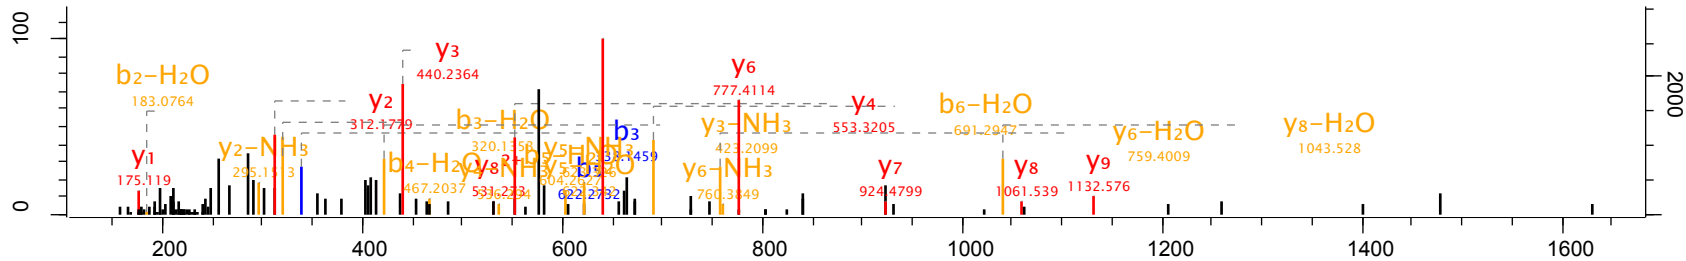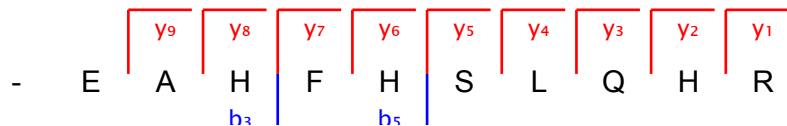

| Raw file                          | Scan | Method   | Score | m/z    | Gene names |
|-----------------------------------|------|----------|-------|--------|------------|
| 20140918_fract5_dyn_5ul_D5_01_372 | 7293 | TOF; CID | 89.83 | 563.76 | CRELD2     |

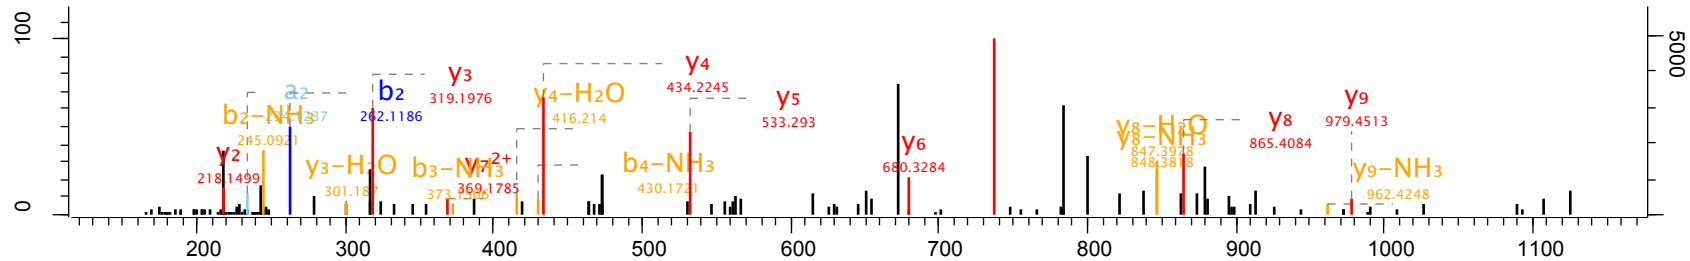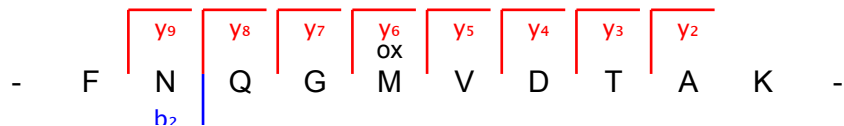

| Raw file                          | Scan  | Method   | Score | m/z    | Gene names |
|-----------------------------------|-------|----------|-------|--------|------------|
| 20140918_fract5_dyn_5ul_D5_01_372 | 11876 | TOF; CID | 79.47 | 408.21 | TMEM187    |

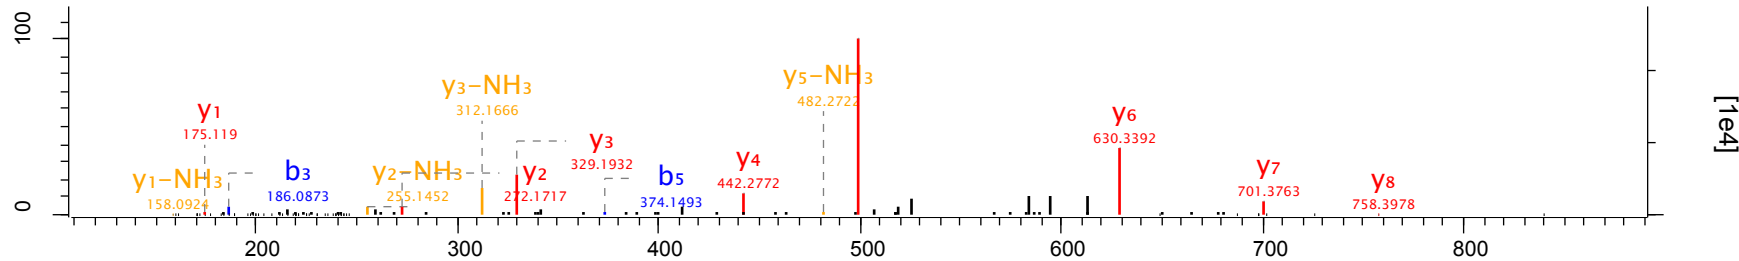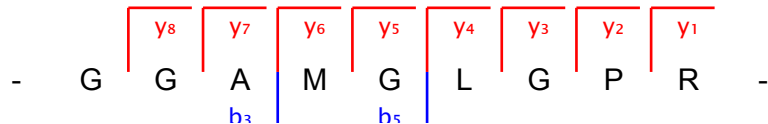



Raw file

20140918\_fract5\_dyn\_5ul\_D5\_01\_372

Scan

13299

Method

TOF; CID

Score

105.13

m/z

641.31

Gene names

C17orf89

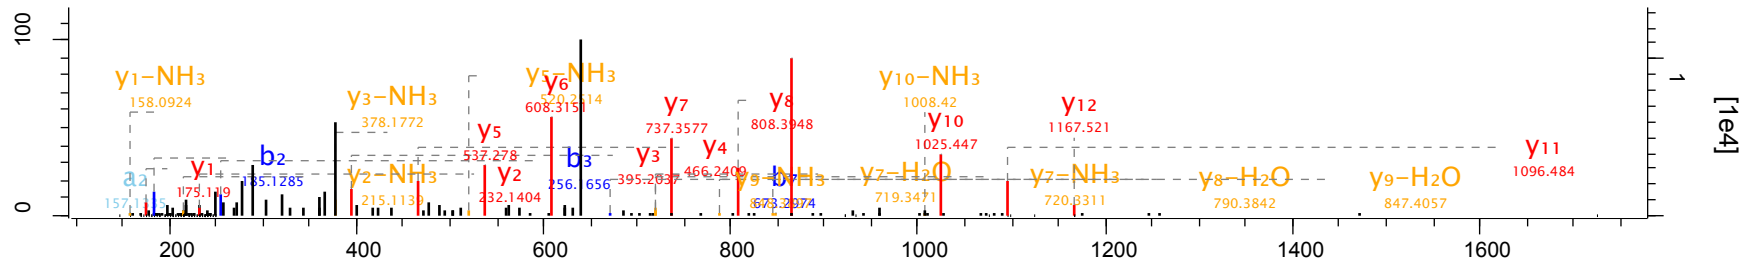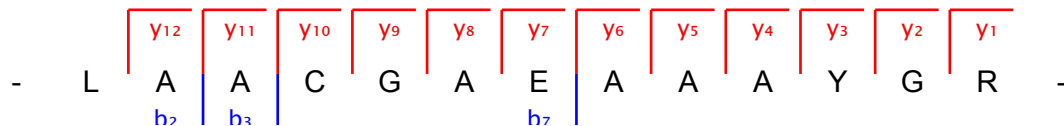

| Raw file                          | Scan  | Method   | Score | m/z    | Gene names |
|-----------------------------------|-------|----------|-------|--------|------------|
| 20140918_fract5_dyn_5ul_D5_01_372 | 14338 | TOF; CID | 64.82 | 660.81 | RAB19      |

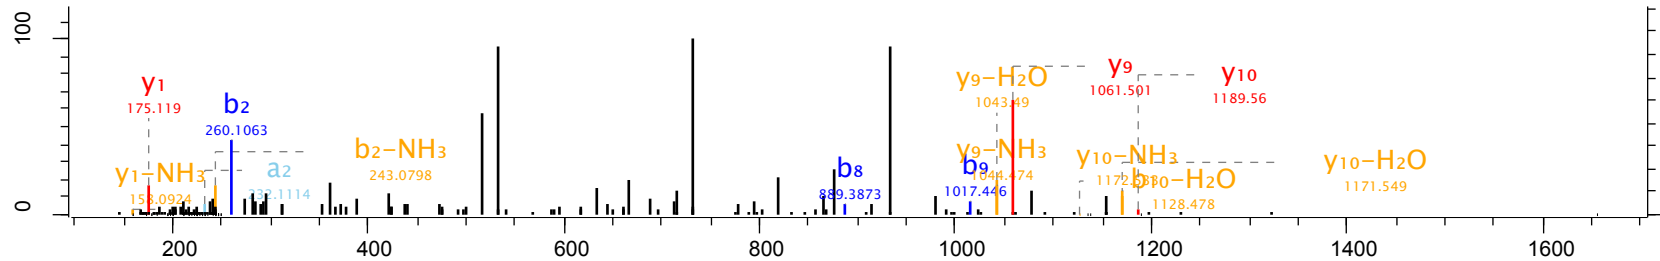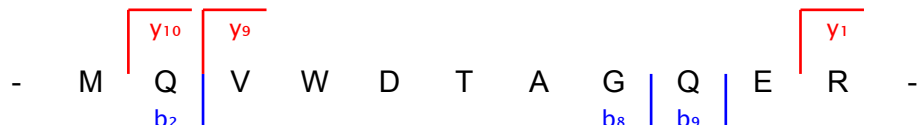

| Raw file                          | Scan  | Method   | Score | m/z    | Gene names |
|-----------------------------------|-------|----------|-------|--------|------------|
| 20140918_fract5_dyn_5ul_D5_01_372 | 14907 | TOF; CID | 94.02 | 510.62 | IFI27L2    |

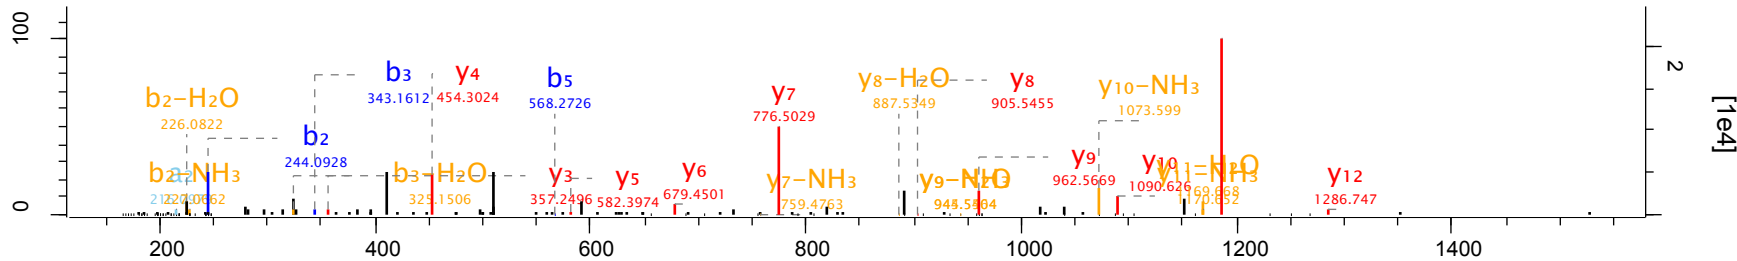

- E N V P Q G E P P K P P L K -  
 b<sub>2</sub> b<sub>3</sub> b<sub>5</sub>  
 y<sub>12</sub> y<sub>11</sub> y<sub>10</sub> y<sub>9</sub> y<sub>8</sub> y<sub>7</sub> y<sub>6</sub> y<sub>5</sub> y<sub>4</sub> y<sub>3</sub>

Raw file

20140918\_fract5\_dyn\_5ul\_D5\_01\_372

Scan

19805

Method

TOF; CID

Score

55.72

m/z

746.39

Gene names

C20orf24

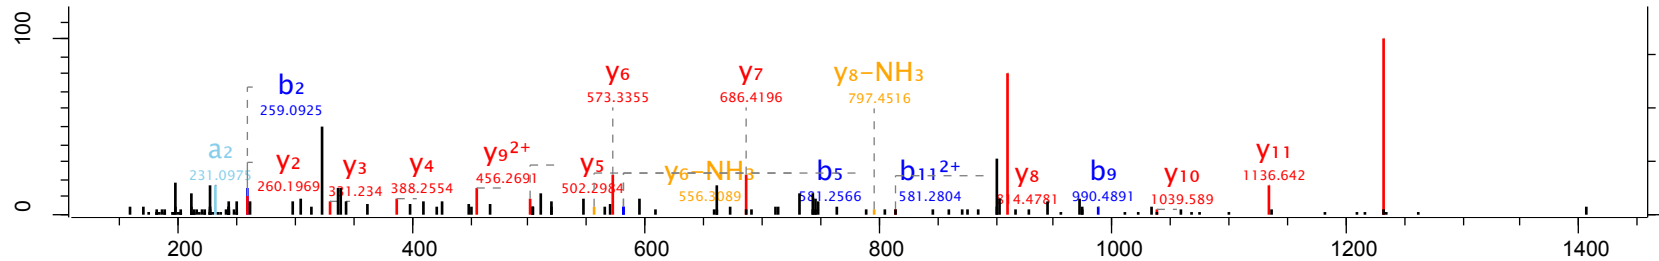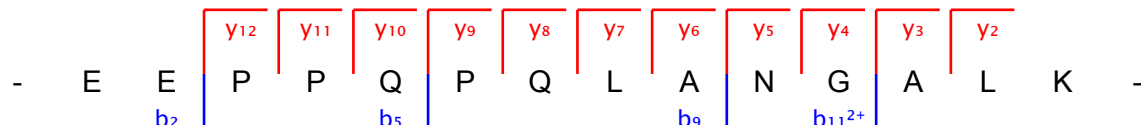

Raw file

20140918\_fract5\_dyn\_5ul\_D5\_01\_372

Scan

19851

Method

TOF; CID

Score

99.71

m/z

860.4

Gene names

DPH3

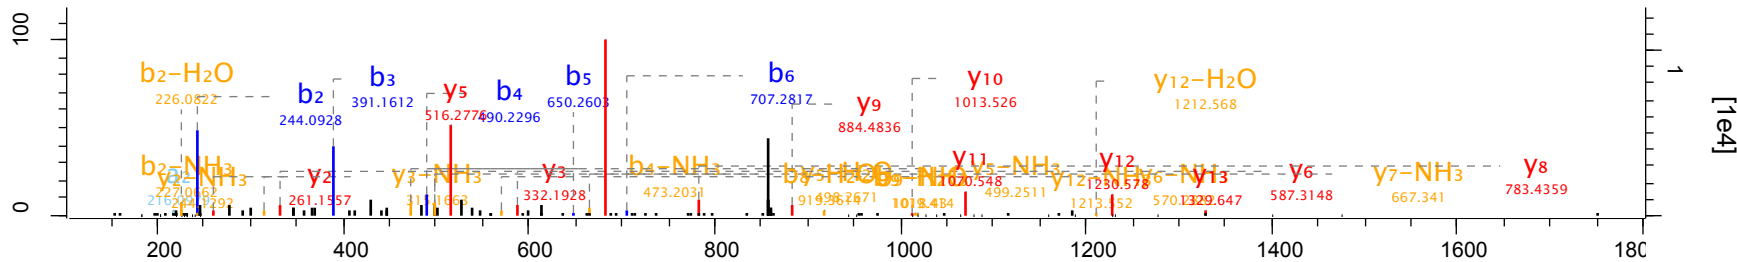

- D Q F V C G E T V P A P S A N K -

b<sub>2</sub> | b<sub>3</sub> | y<sub>13</sub> | y<sub>12</sub> | y<sub>11</sub> | y<sub>10</sub> | y<sub>9</sub> | y<sub>8</sub> | y<sub>7</sub> | y<sub>6</sub> | y<sub>5</sub> | y<sub>3</sub> | y<sub>2</sub>  
b<sub>2</sub> | b<sub>3</sub> | b<sub>4</sub> | b<sub>5</sub> | b<sub>6</sub>

| Raw file                          | Scan  | Method   | Score  | m/z    | Gene names |
|-----------------------------------|-------|----------|--------|--------|------------|
| 20140918_fract5_dyn_5ul_D5_01_372 | 22314 | TOF; CID | 124.59 | 451.25 | BTBD16     |

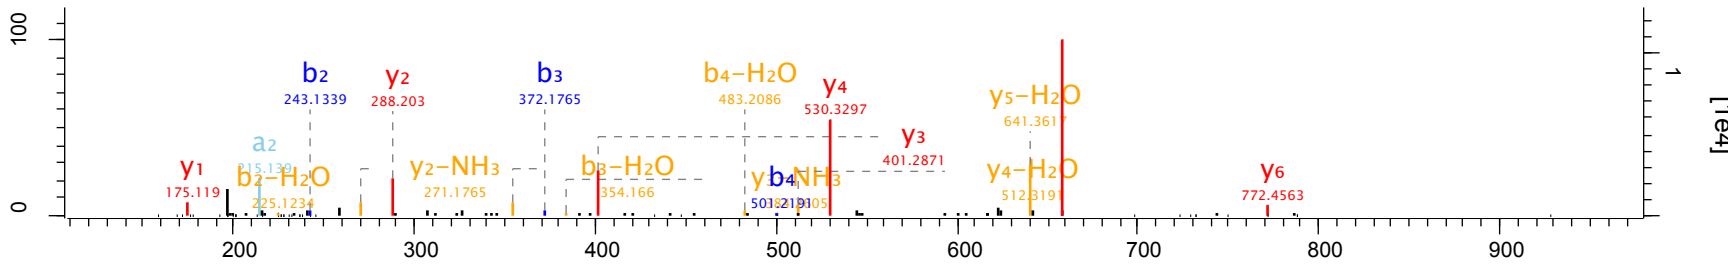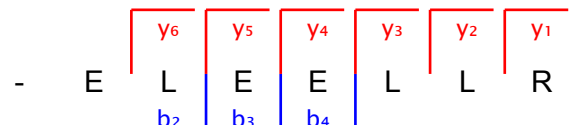

Raw file

20140918\_fract5\_dyn\_5ul\_D5\_01\_372

Scan

26055

Method

TOF; CID

Score

133.13

m/z

633.32

Gene names

DNAH14

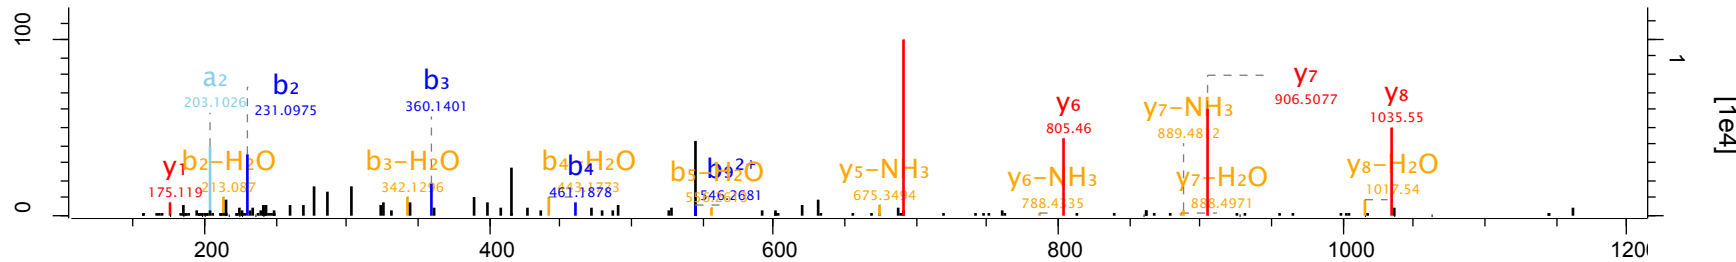

- E T E T L M E K L R -  
 b2 b3 b4 b5  
 h2+ h3 h4 h5

Raw file

20140918\_fract5\_dyn\_5ul\_D5\_01\_372

Scan

26579

Method

TOF; CID

Score

101.28

m/z

943.97

Gene names

MKKS

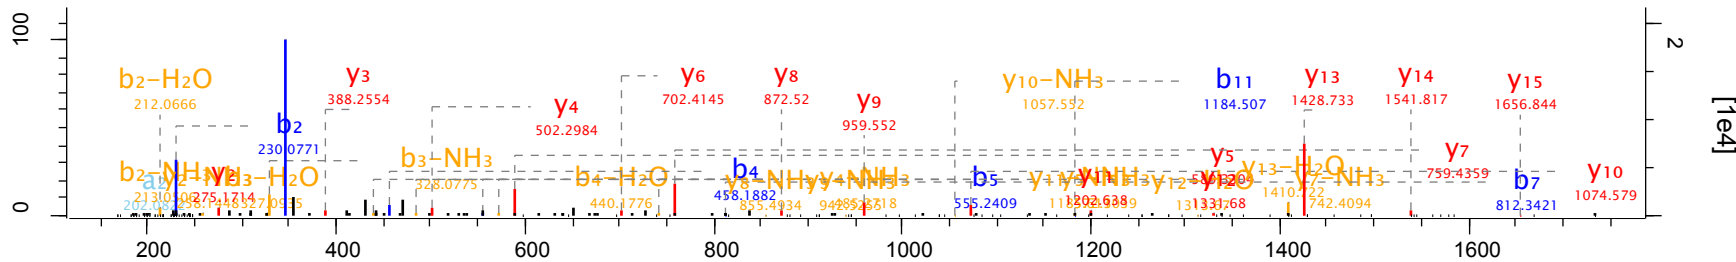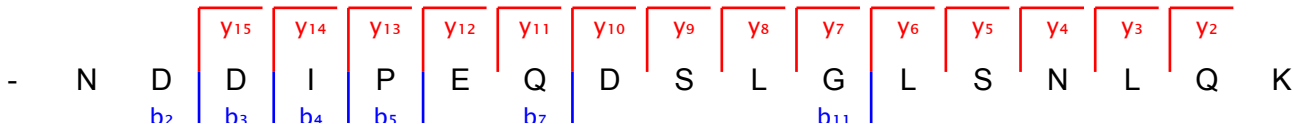



| Raw file                          | Scan  | Method   | Score | m/z    | Gene names  |
|-----------------------------------|-------|----------|-------|--------|-------------|
| 20140918_fract5_dyn_5ul_D5_01_372 | 27130 | TOF; CID | 66.99 | 614.37 | MDM1;MAP2K6 |

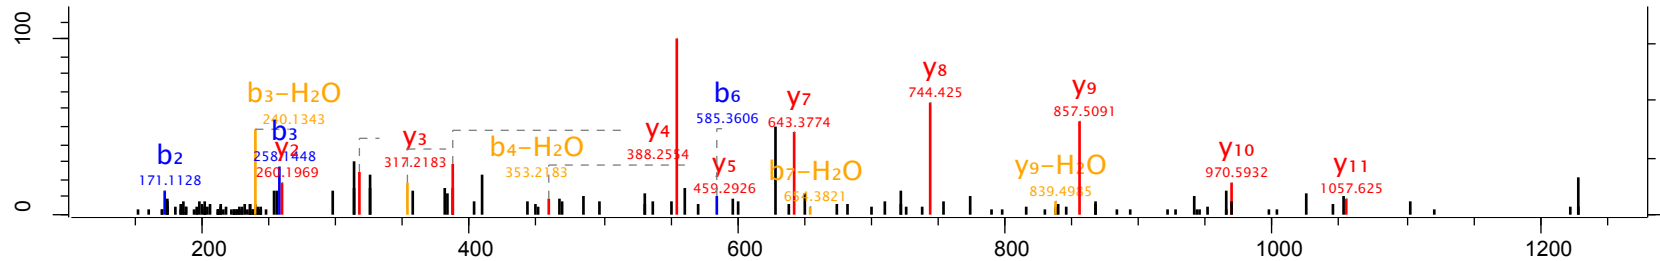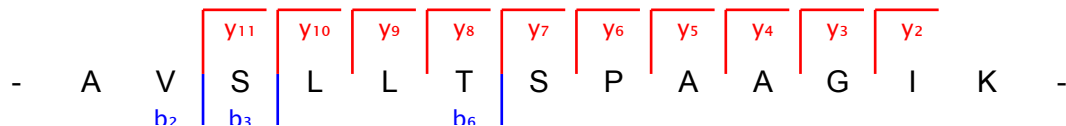

Raw file

20140918\_fract5\_dyn\_5ul\_D5\_01\_372

Scan

28736

Method

TOF; CID

Score

81.14

m/z

802.06

Gene names

CD68

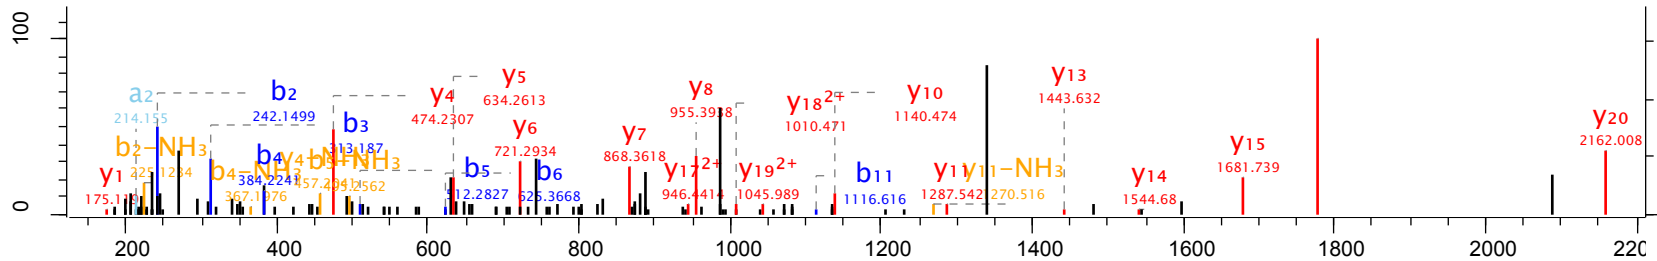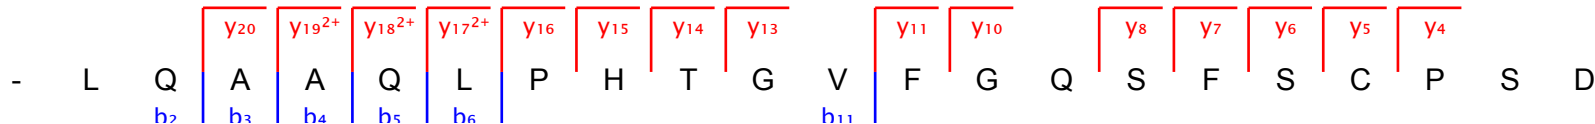

| Raw file                          | Scan  | Method   | Score  | m/z    | Gene names |
|-----------------------------------|-------|----------|--------|--------|------------|
| 20140918_fract5_dyn_5ul_D5_01_372 | 30562 | TOF; CID | 100.02 | 735.03 | UBALD1     |

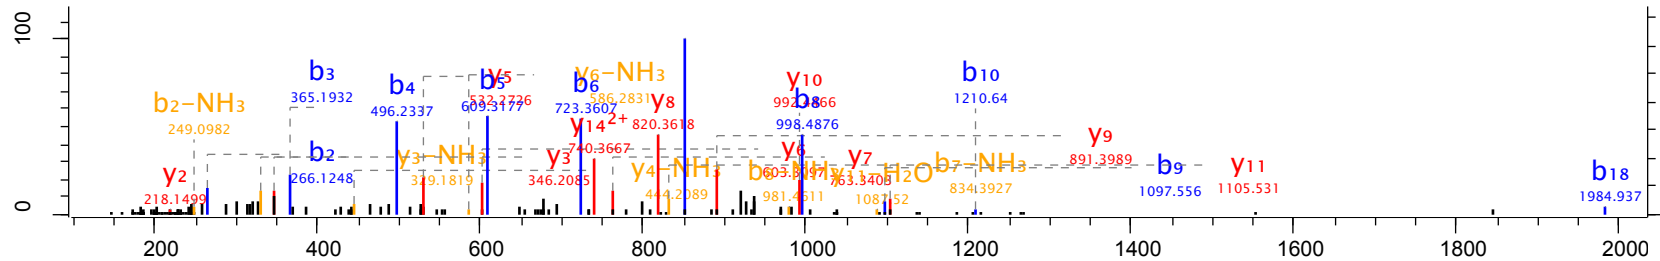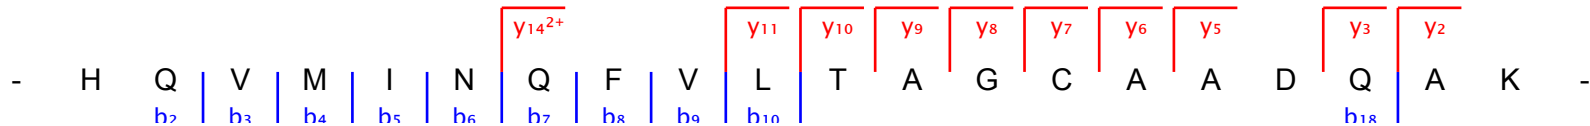

| Raw file                          | Scan  | Method   | Score | m/z    | Gene names |
|-----------------------------------|-------|----------|-------|--------|------------|
| 20140918_fract5_dyn_5ul_D5_01_372 | 31188 | TOF; CID | 93.37 | 581.33 | ZDHHC12    |

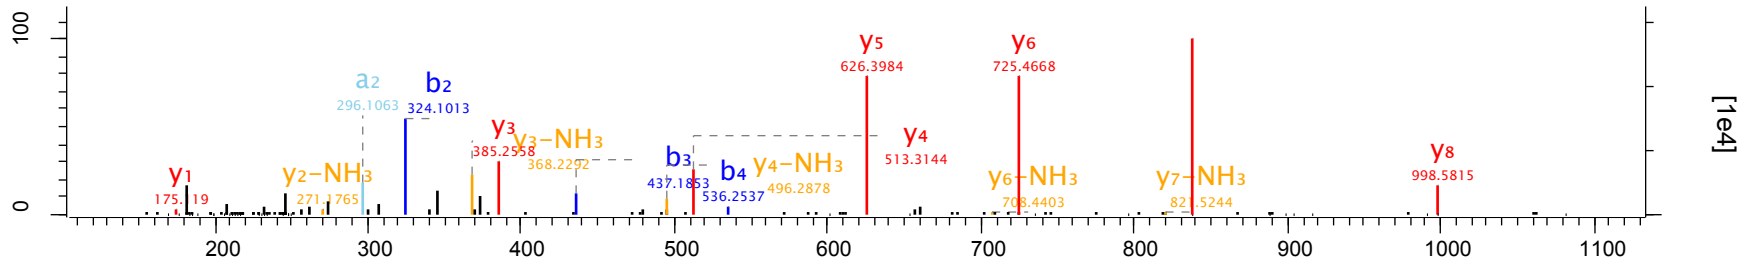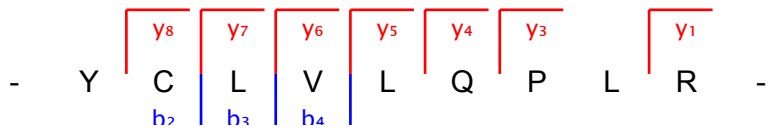

Raw file

20140918\_fract5\_dyn\_5ul\_D5\_01\_372

Scan

31204

Method

TOF; CID

Score

129.38

m/z

626.32

Gene names

OTUB2

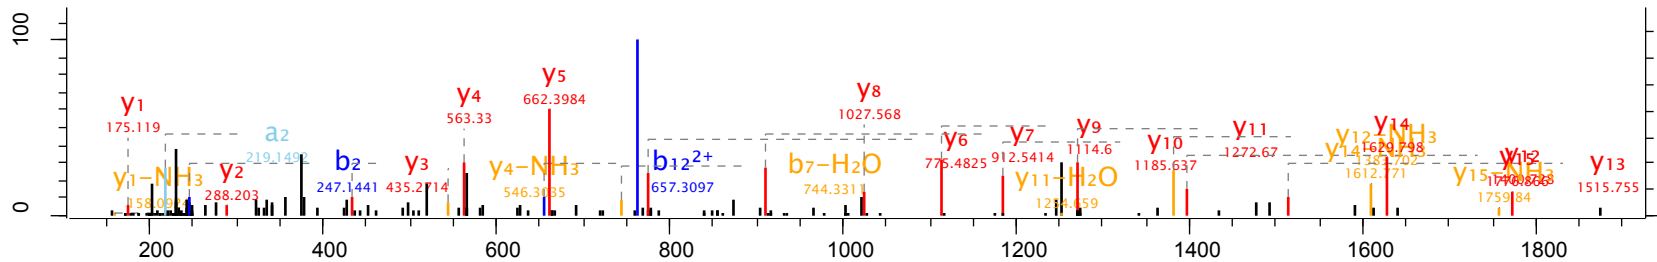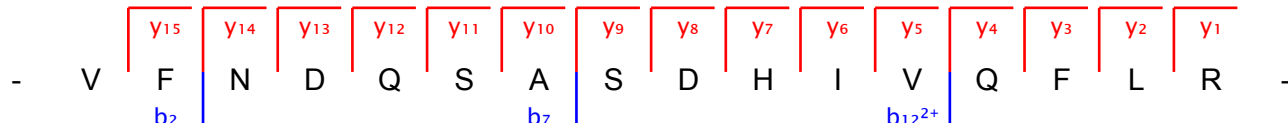

| Raw file                          | Scan  | Method   | Score  | m/z    | Gene names |
|-----------------------------------|-------|----------|--------|--------|------------|
| 20140918_fract5_dyn_5ul_D5_01_372 | 32271 | TOF; CID | 119.53 | 649.82 | TEN1       |

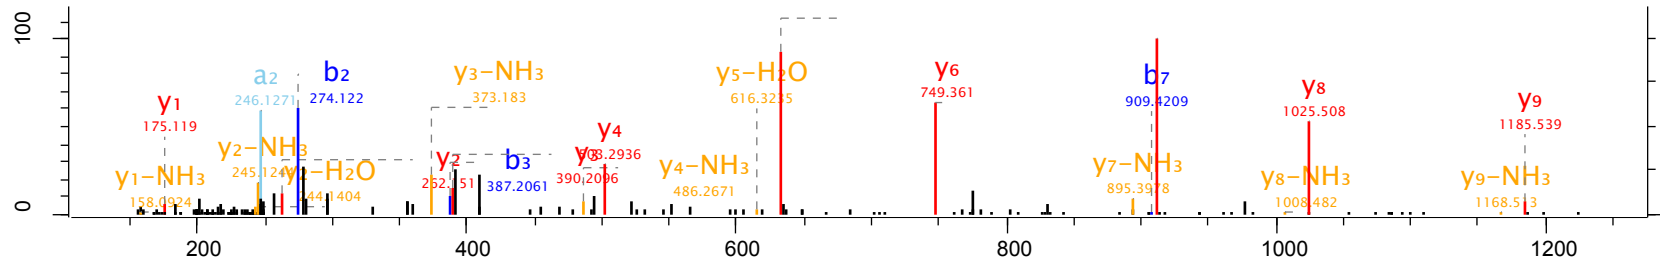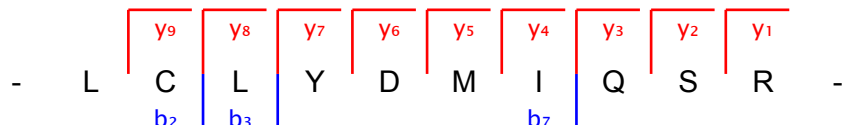

Raw file

20140918\_fract5\_dyn\_5ul\_D5\_01\_372

Scan

32920

Method

TOF; CID

Score

88.28

m/z

950.95

Gene names

APOBEC3C

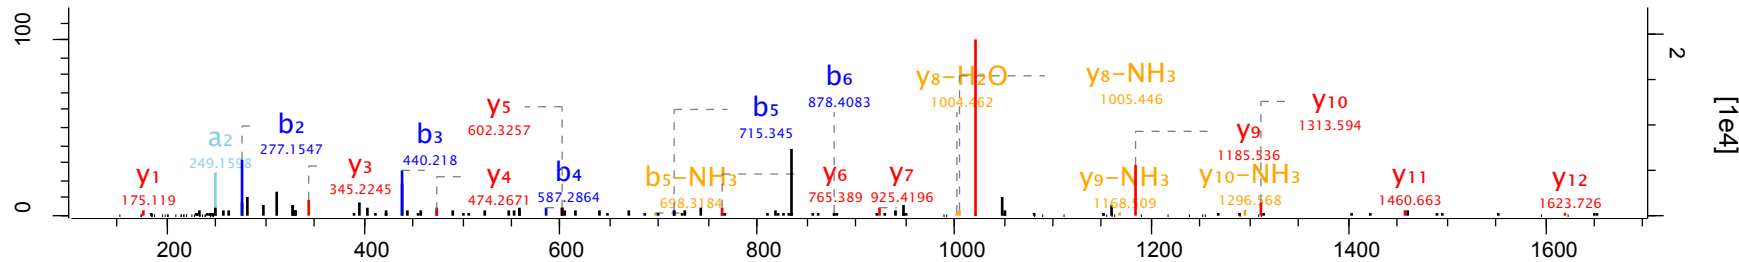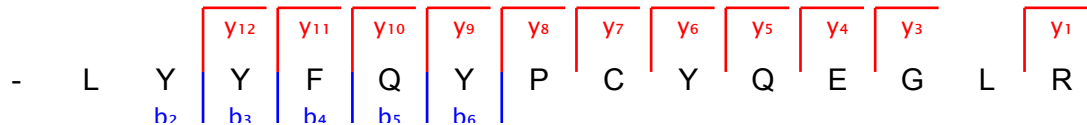

| Raw file                          | Scan  | Method   | Score | m/z    | Gene names |
|-----------------------------------|-------|----------|-------|--------|------------|
| 20140918_fract5_dyn_5ul_D5_01_372 | 33628 | TOF; CID | 64.1  | 773.43 | PIGL       |

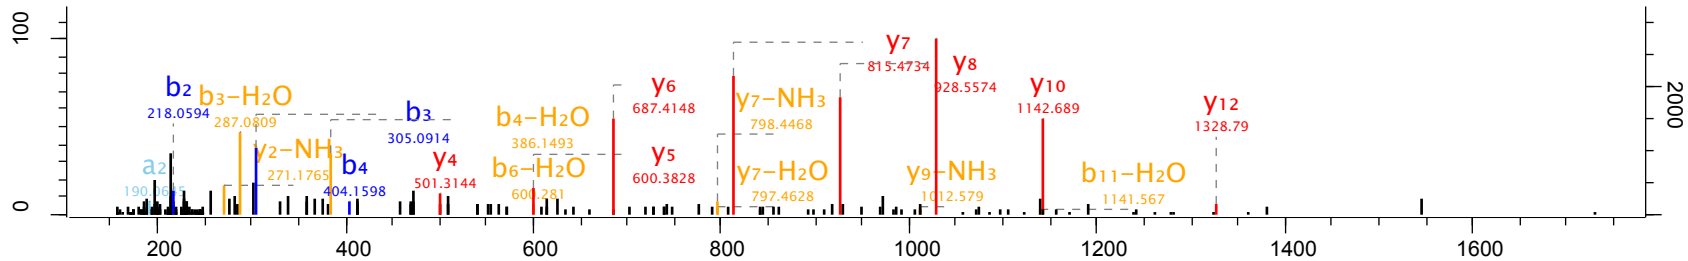

- G C S V L T L Q S V N V L R -  
 b<sub>2</sub> b<sub>3</sub> b<sub>4</sub> y<sub>12</sub> y<sub>10</sub> y<sub>9</sub> y<sub>8</sub> y<sub>7</sub> y<sub>6</sub> y<sub>5</sub> y<sub>4</sub>



| Raw file                          | Scan  | Method   | Score | m/z    | Gene names |
|-----------------------------------|-------|----------|-------|--------|------------|
| 20140918_fract5_dyn_5ul_D5_01_372 | 34434 | TOF; CID | 59.23 | 659.36 | CDC14B     |

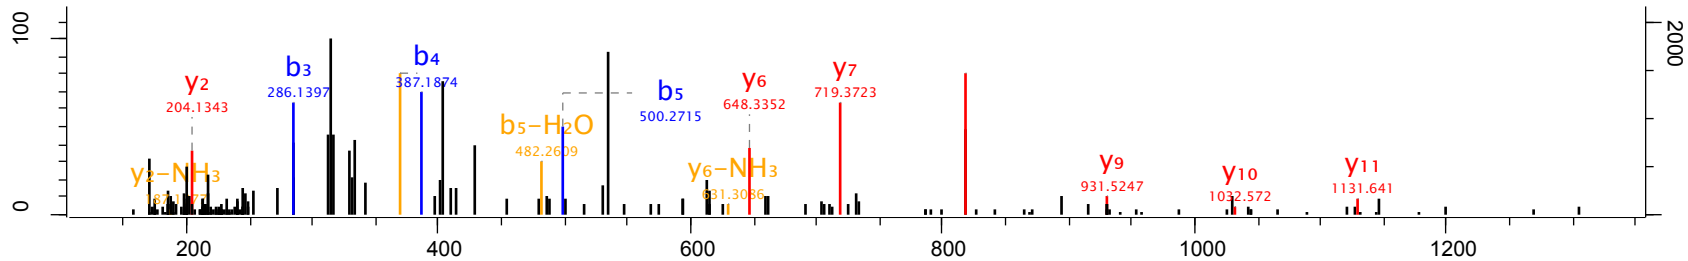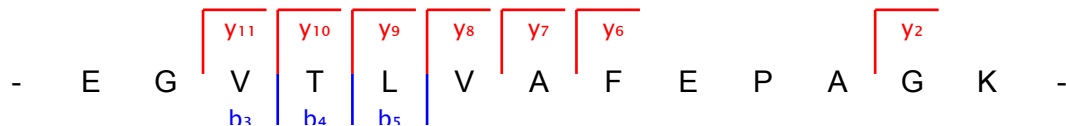

Raw file

20140918\_fract5\_dyn\_5ul\_D5\_01\_372

Scan

34980

Method

TOF; CID

Score

104.22

m/z

576.86

Gene names

SPIN4

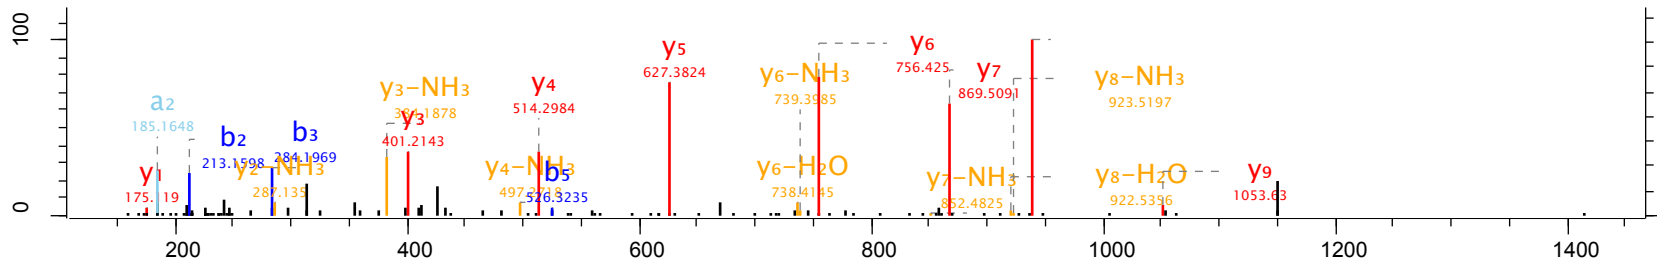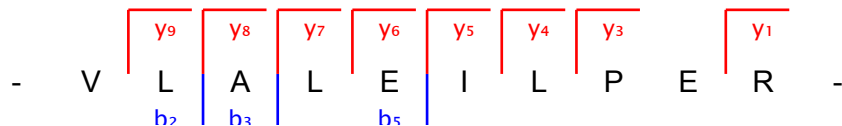

| Raw file                          | Scan  | Method   | Score | m/z    | Gene names |
|-----------------------------------|-------|----------|-------|--------|------------|
| 20140918_fract5_dyn_5ul_D5_01_372 | 36322 | TOF; CID | 68.24 | 651.32 | BCL2       |

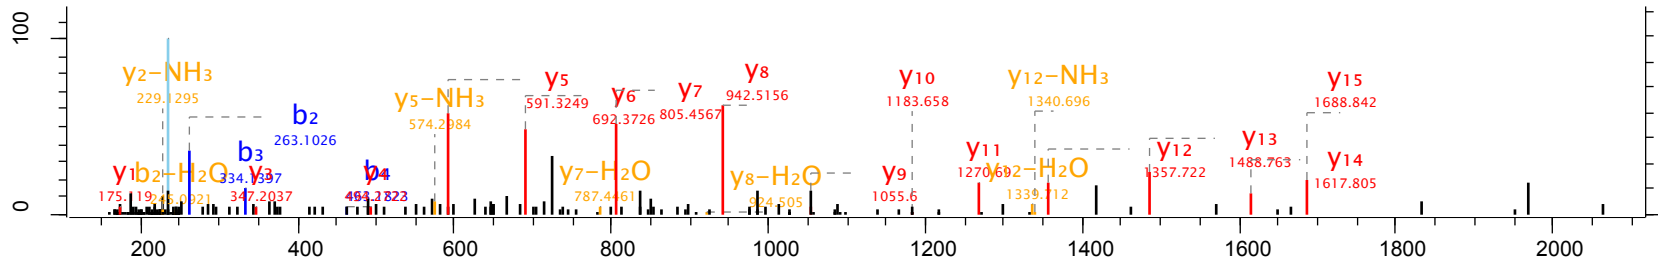

- D F A E M S S Q L H L T P F T A R -  
 b<sub>2</sub> b<sub>3</sub> b<sub>4</sub>

| Raw file                          | Scan  | Method   | Score | m/z    | Gene names |
|-----------------------------------|-------|----------|-------|--------|------------|
| 20140918_fract5_dyn_5ul_D5_01_372 | 37423 | TOF; CID | 54.09 | 557.29 | IFT46      |

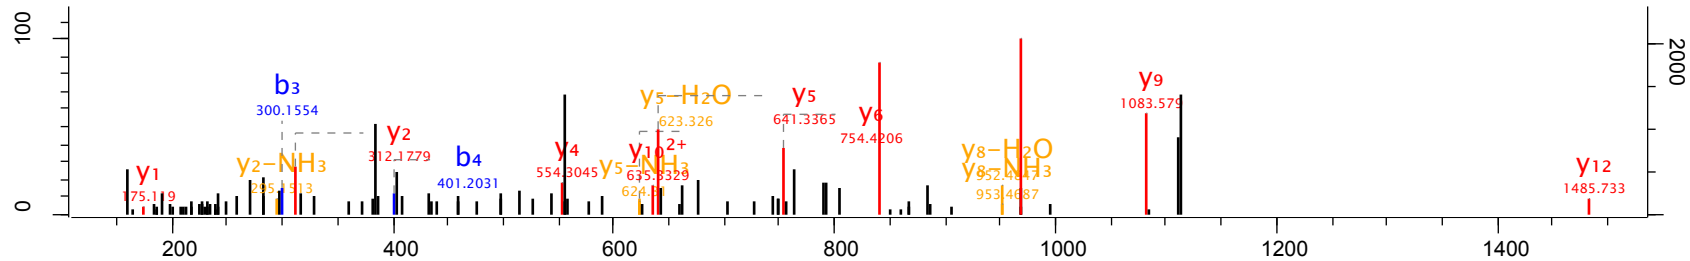

- A I D T W I E S I S E L H R -

Fragmentation diagram showing the sequence of amino acids: A, I, D, T, W, I, E, S, I, S, E, L, H, R. Red brackets above the sequence indicate the fragmentation sites for the y-series ions (y1 to y12). Blue brackets below the sequence indicate the fragmentation sites for the b-series ions (b3 and b4).

| Raw file                          | Scan  | Method   | Score | m/z    | Gene names |
|-----------------------------------|-------|----------|-------|--------|------------|
| 20140918_fract5_dyn_5ul_D5_01_372 | 37450 | TOF; CID | 89.23 | 750.91 | TMEM128    |

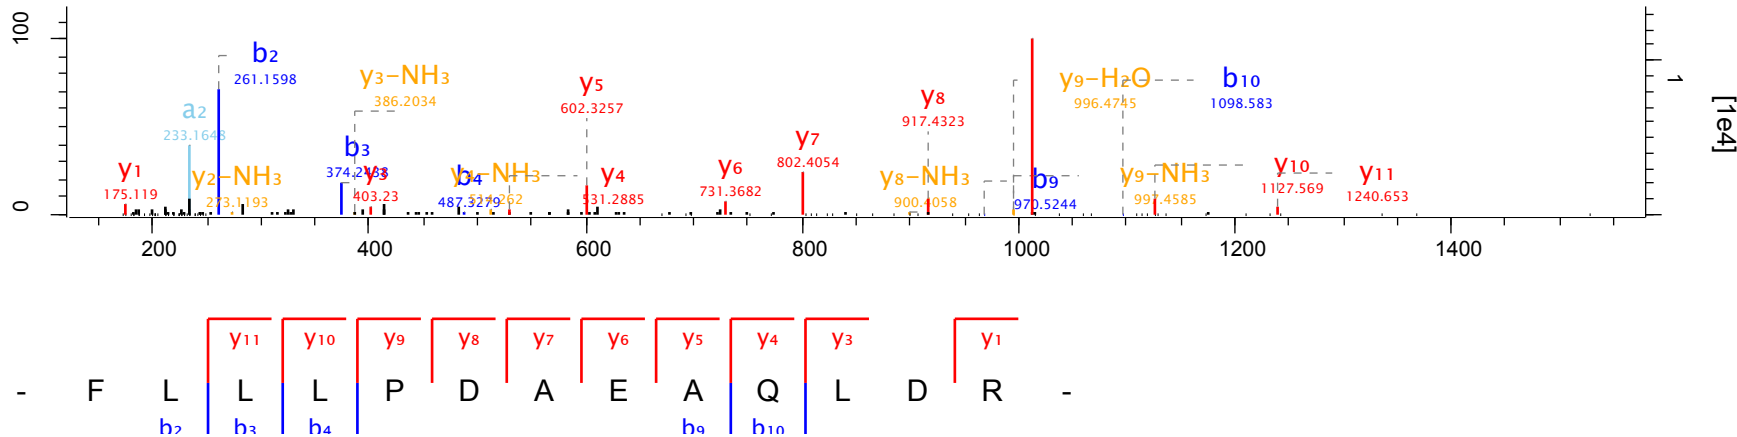

Raw file

20140918\_fract5\_dyn\_5ul\_D5\_01\_372

Scan

38197

Method

TOF; CID

Score

110.9

m/z

1119.89

Gene names

MRPL54

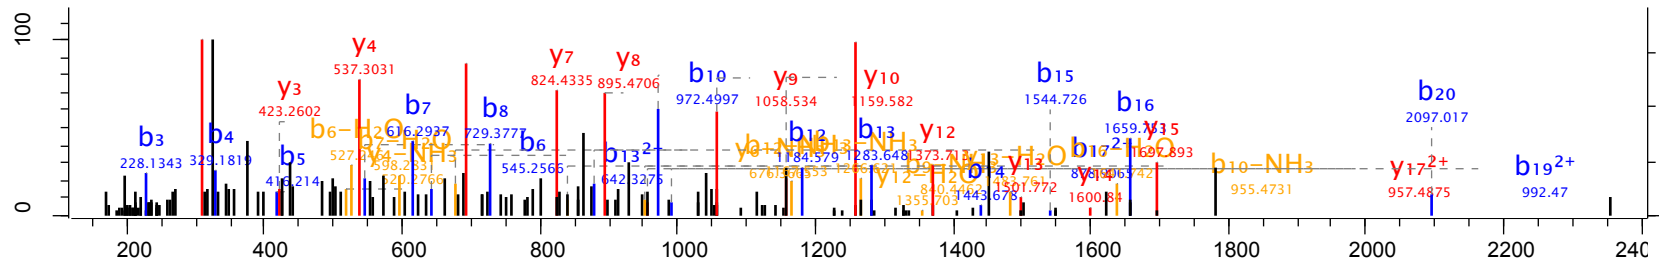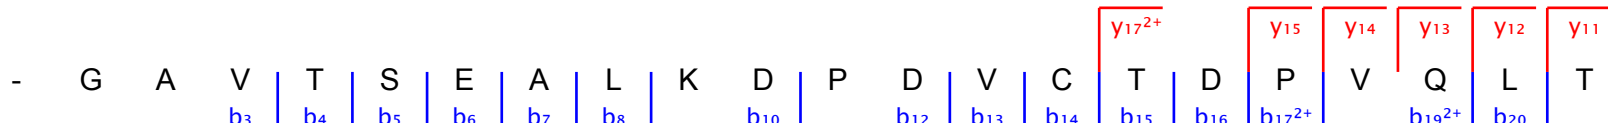

| Raw file                          | Scan | Method   | Score  | m/z   | Gene names |
|-----------------------------------|------|----------|--------|-------|------------|
| 20140918_fract6_dyn_5ul_D6_01_373 | 5072 | TOF; CID | 144.09 | 594.3 | NR1H3      |

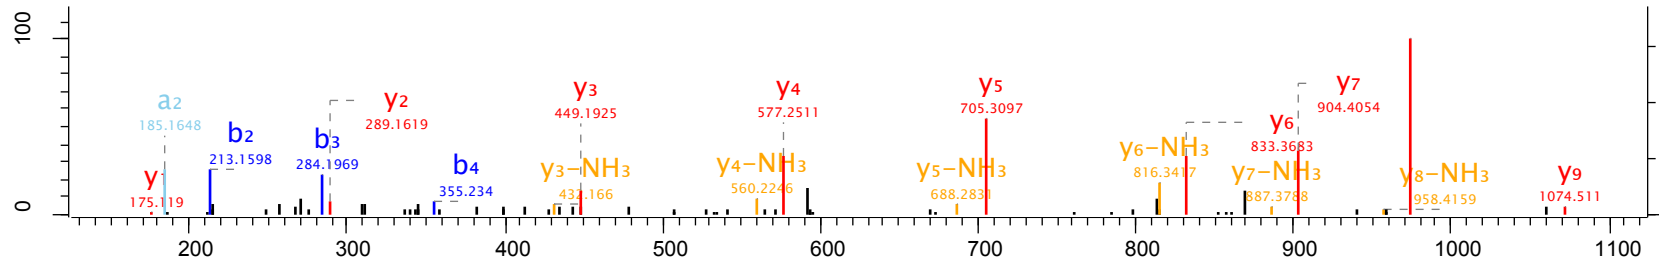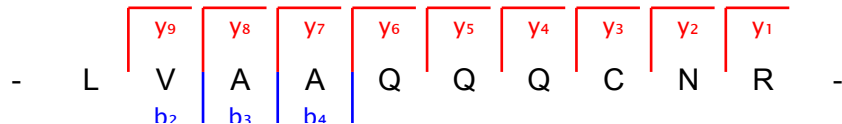

| Raw file                          | Scan | Method   | Score | m/z   | Gene names |
|-----------------------------------|------|----------|-------|-------|------------|
| 20140918_fract6_dyn_5ul_D6_01_373 | 7562 | TOF; CID | 91.07 | 566.3 | ZKSCAN4    |

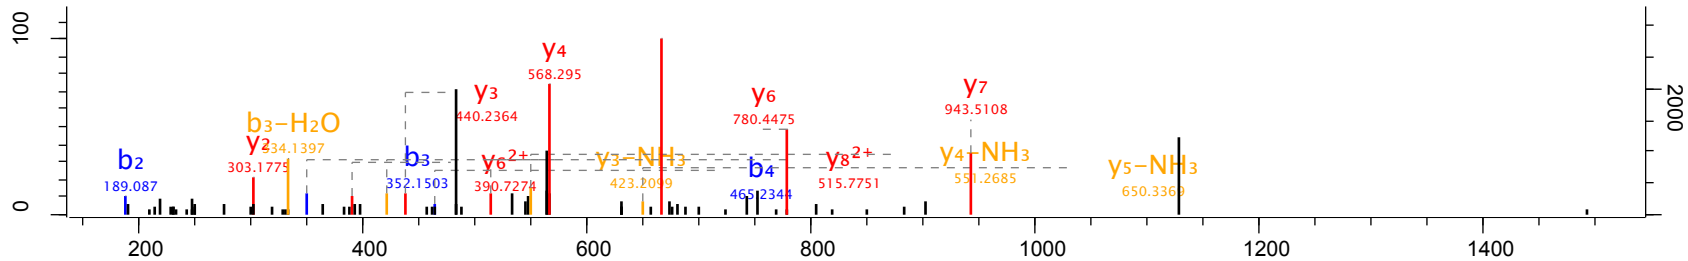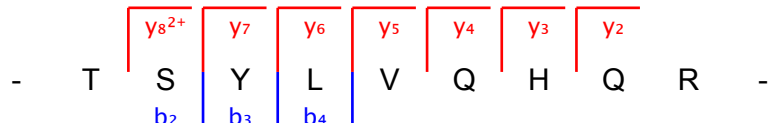



Raw file

Scan

Method

Score

m/z

Gene names

20140918\_fract6\_dyn\_5ul\_D6\_01\_373

8867

TOF; CID

111.63

625.82

STXBP6

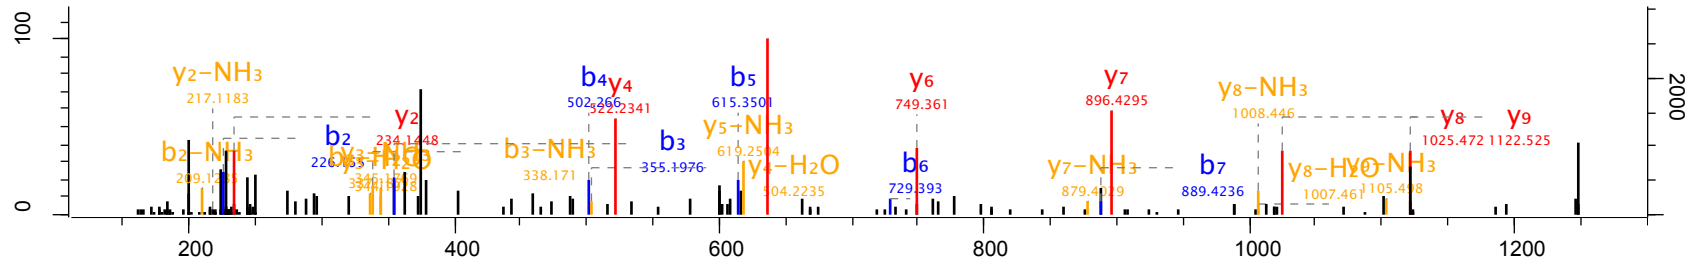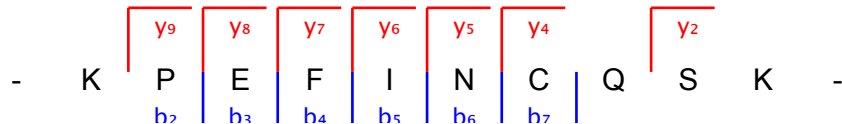

Raw file

20140918\_fract6\_dyn\_5ul\_D6\_01\_373

Scan

10923

Method

TOF; CID

Score

105.95

m/z

617.33

Gene names

HDGFRP2

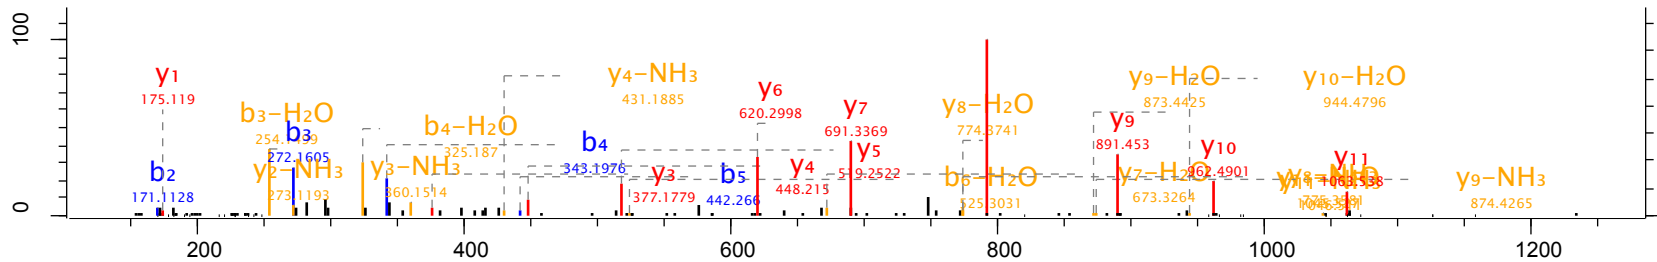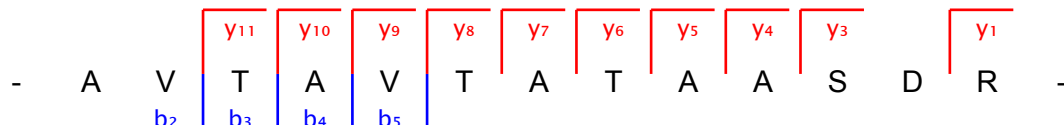

Raw file

20140918\_fract6\_dyn\_5ul\_D6\_01\_373

Scan

13691

Method

TOF; CID

Score

133.42

m/z

607.83

Gene names

SLC25A14

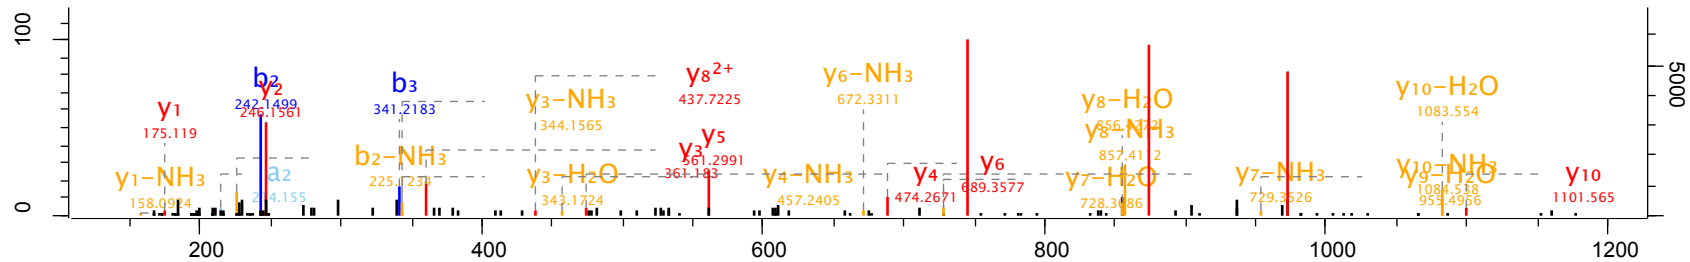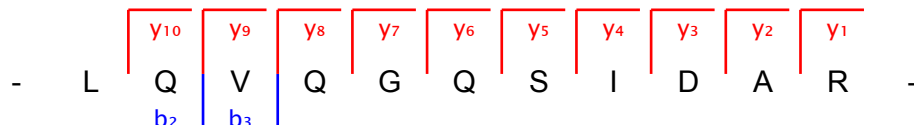

Raw file

20140918\_fract6\_dyn\_5ul\_D6\_01\_373

Scan

15296

Method

TOF; CID

Score

143.5

m/z

638.29

Gene names

CKS1B

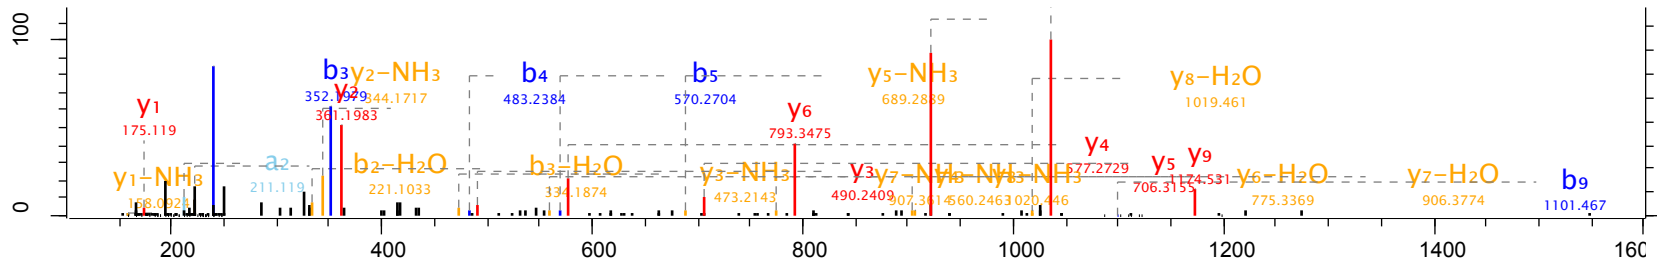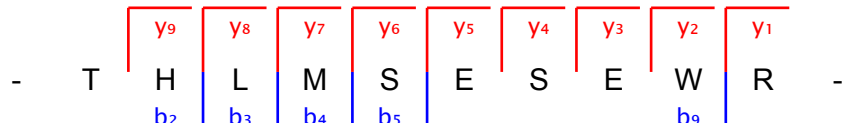

Raw file

20140918\_fract6\_dyn\_5ul\_D6\_01\_373

Scan

17547

Method

TOF; CID

Score

145.69

m/z

843.39

Gene names

ELOVL6

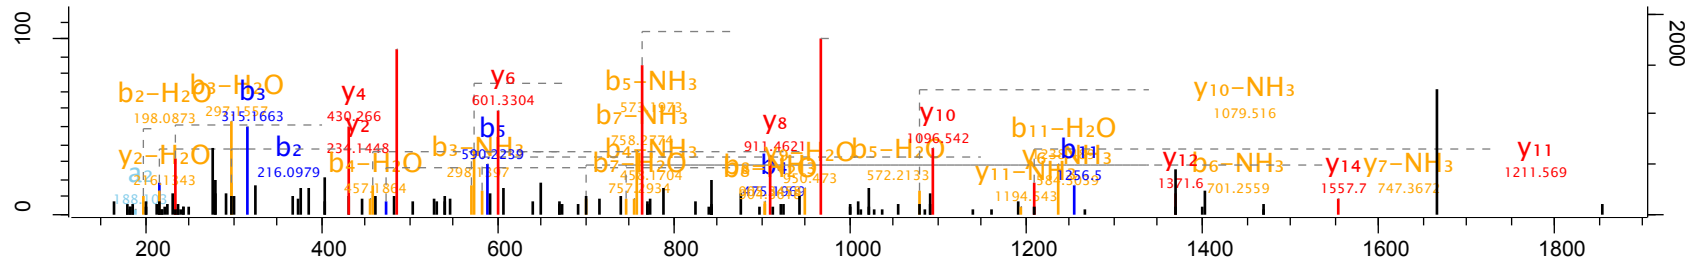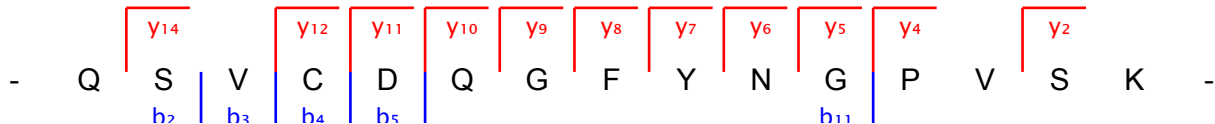

Raw file

20140918\_fract6\_dyn\_5ul\_D6\_01\_373

Scan

19067

Method

TOF; CID

Score

103.13

m/z

604.31

Gene names

TMEM44

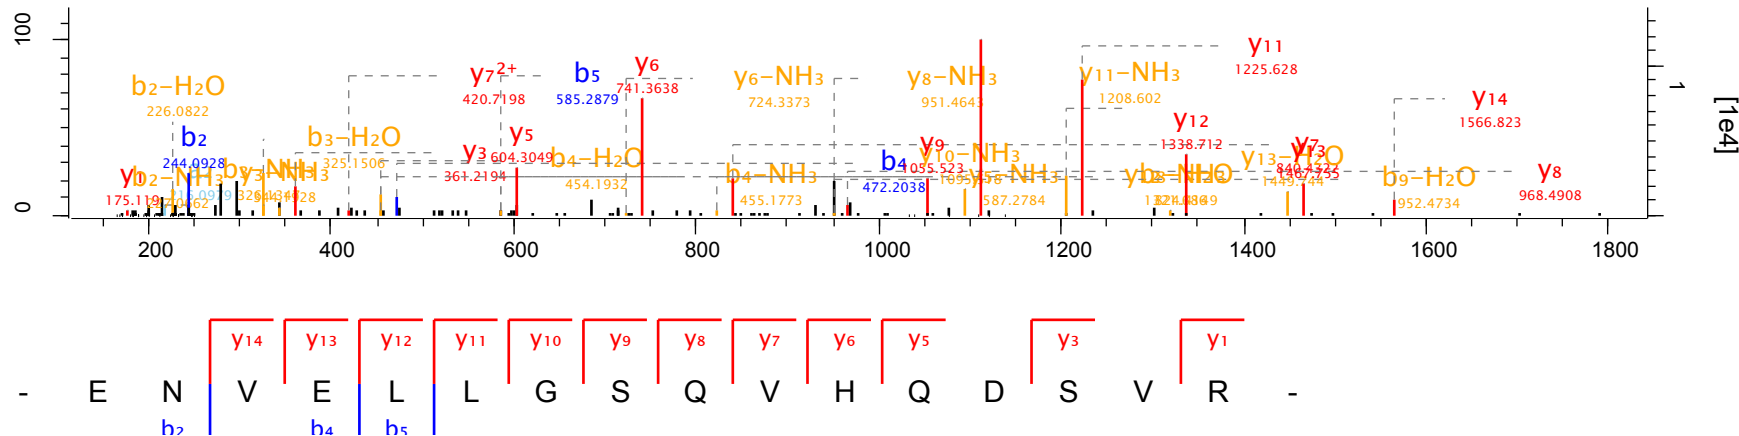

| Raw file                          | Scan  | Method   | Score | m/z    | Gene names |
|-----------------------------------|-------|----------|-------|--------|------------|
| 20140918_fract6_dyn_5ul_D6_01_373 | 19730 | TOF; CID | 75.09 | 700.84 | JOSD2      |

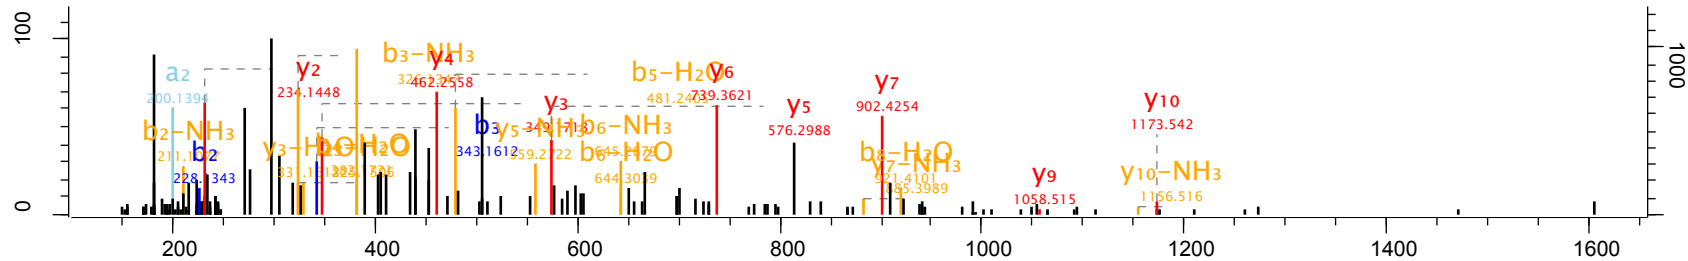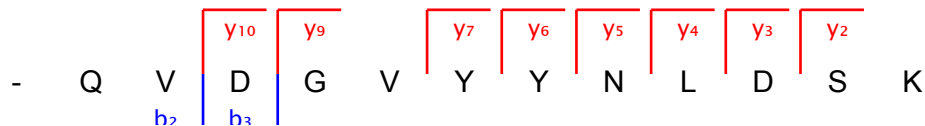

Raw file

20140918\_fract6\_dyn\_5ul\_D6\_01\_373

Scan

20609

Method

TOF; CID

Score

81.66

m/z

579.61

Gene names

CYB561

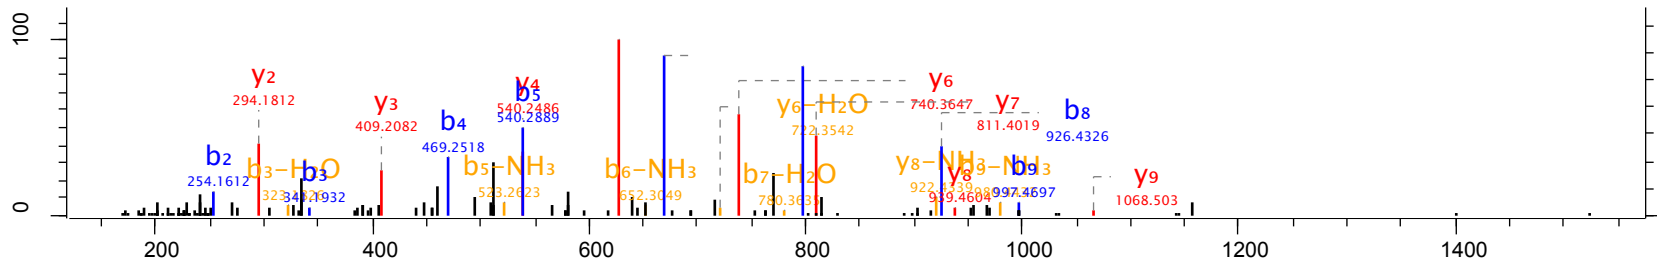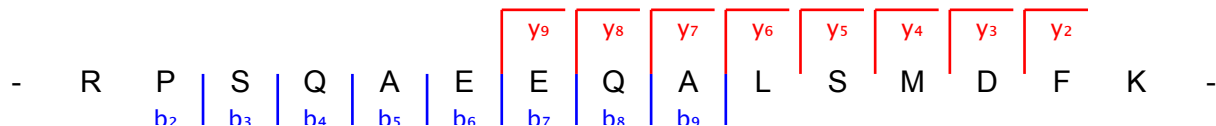



| Raw file                          | Scan  | Method   | Score | m/z     | Gene names |
|-----------------------------------|-------|----------|-------|---------|------------|
| 20140918_fract6_dyn_5ul_D6_01_373 | 21525 | TOF; CID | 54.87 | 1137.52 | MDM2       |

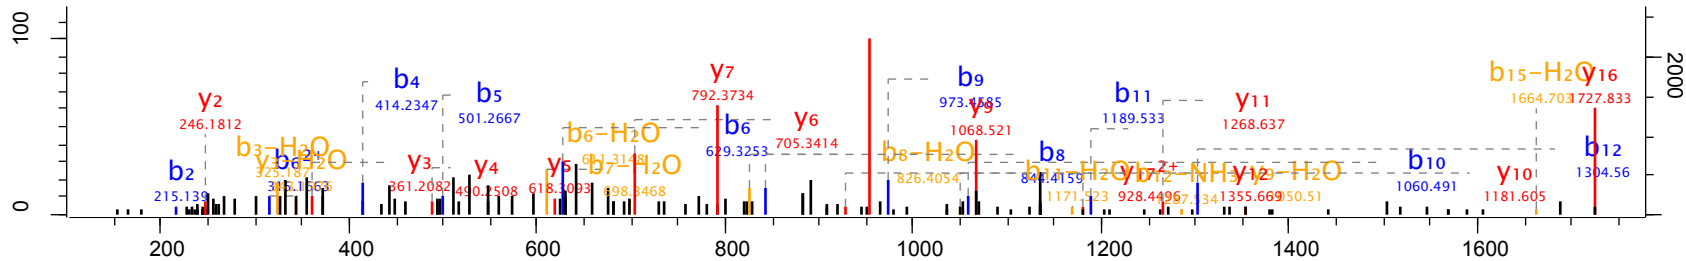

- I T Q A S Q S Q E S E D Y S Q P S T S S S  
 b<sub>2</sub> | b<sub>4</sub> | b<sub>5</sub> | b<sub>6</sub> | b<sub>8</sub> | b<sub>9</sub> | b<sub>10</sub> | b<sub>11</sub> | b<sub>12</sub>  
 y<sub>17</sub><sup>2+</sup> | y<sub>16</sub> | y<sub>12</sub> | y<sub>11</sub>

Raw file

20140918\_fract6\_dyn\_5ul\_D6\_01\_373

Scan

22016

Method

TOF; CID

Score

102.52

m/z

548.28

Gene names

SOCS2

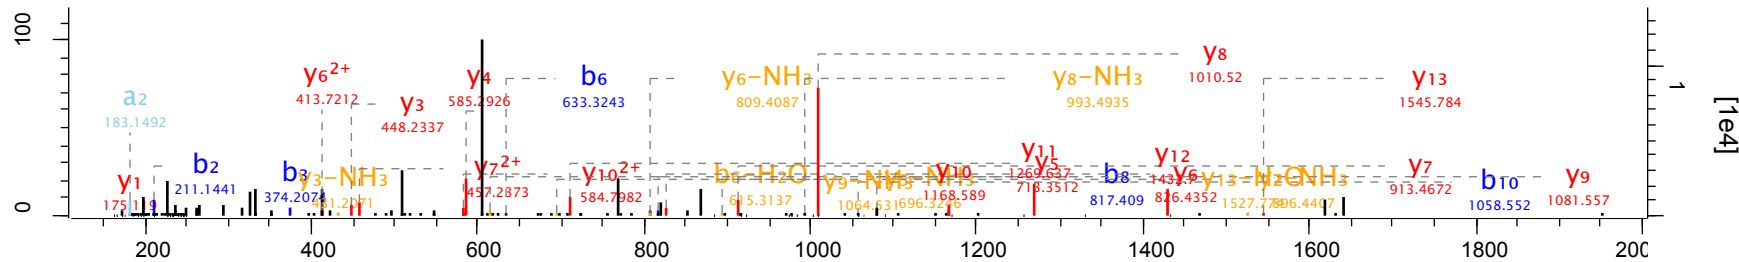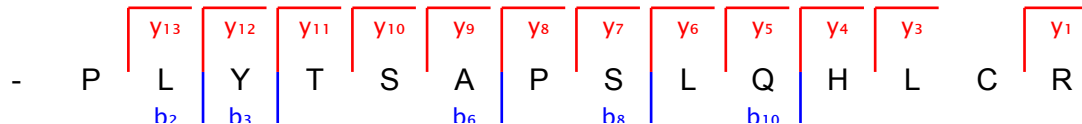

Raw file

20140918\_fract6\_dyn\_5ul\_D6\_01\_373

Scan

22979

Method

TOF; CID

Score

152

m/z

949.44

Gene names

SLC18B1

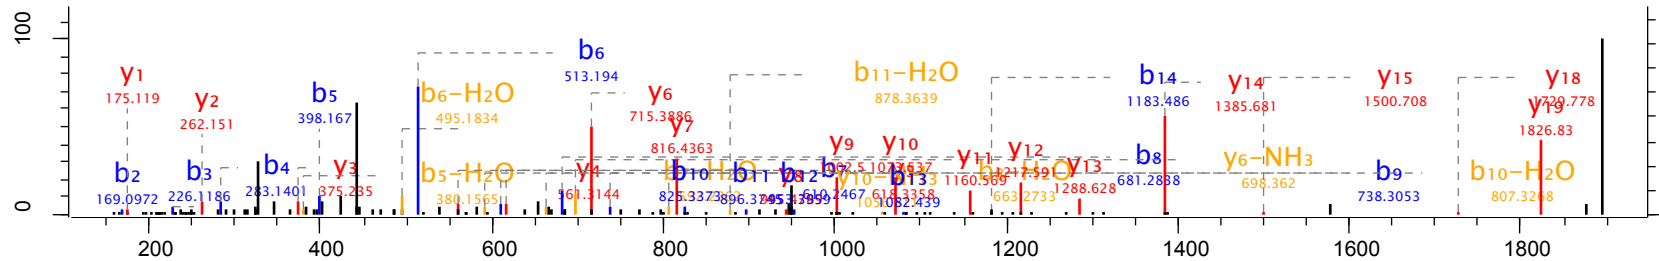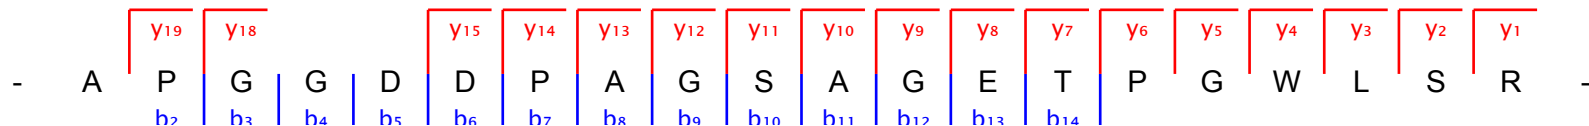

| Raw file                          | Scan  | Method   | Score | m/z    | Gene names |
|-----------------------------------|-------|----------|-------|--------|------------|
| 20140918_fract6_dyn_5ul_D6_01_373 | 22980 | TOF; CID | 93.16 | 499.31 | ZBTB26     |

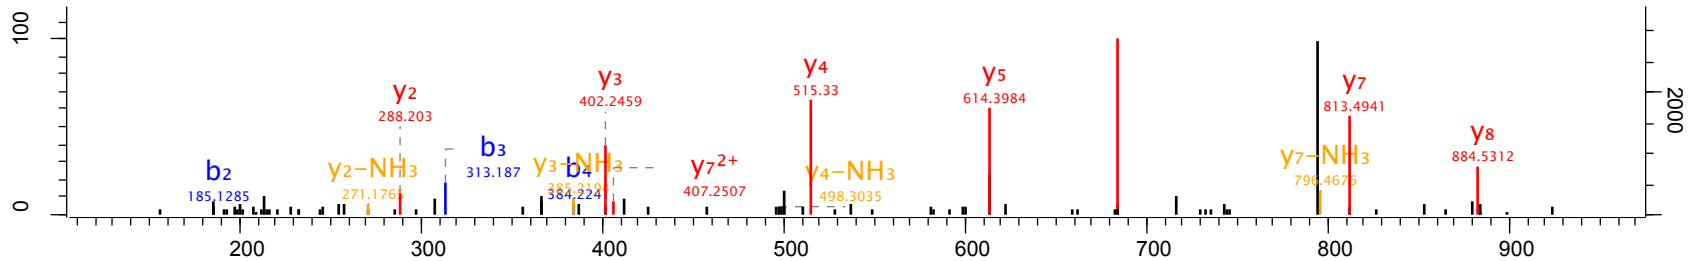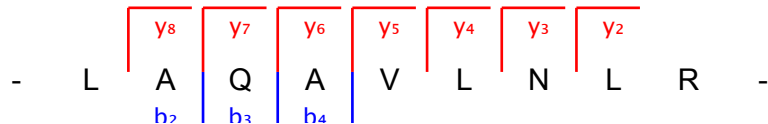

Raw file

20140918\_fract6\_dyn\_5ul\_D6\_01\_373

Scan

25453

Method

TOF; CID

Score

87.67

m/z

617.64

Gene names

HNRNPH1

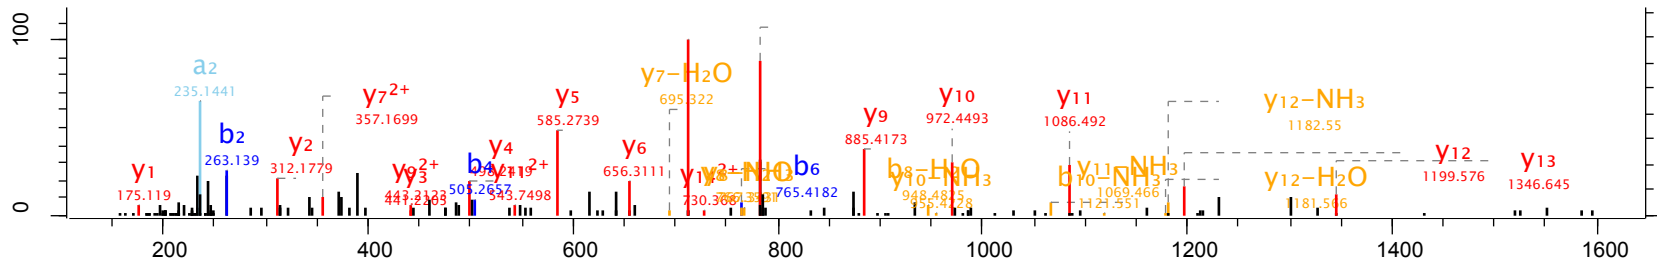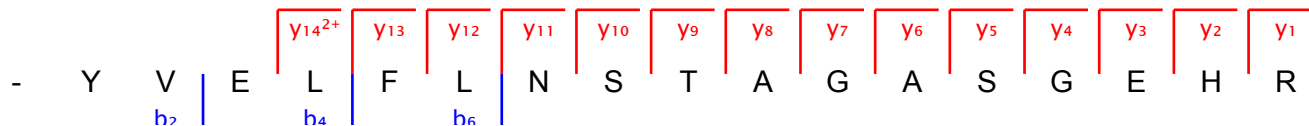

Raw file

20140918\_fract6\_dyn\_5ul\_D6\_01\_373

Scan

27376

Method

TOF; CID

Score

51.64

m/z

556.29

Gene names

FAM210B

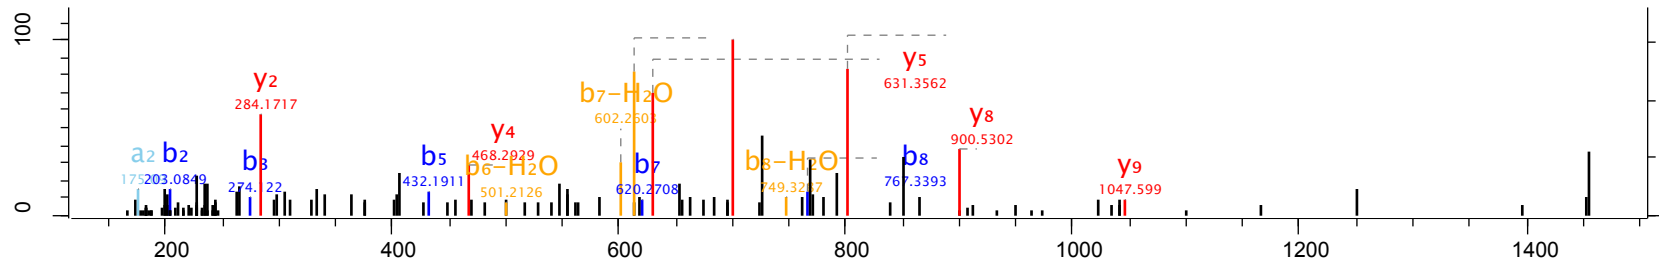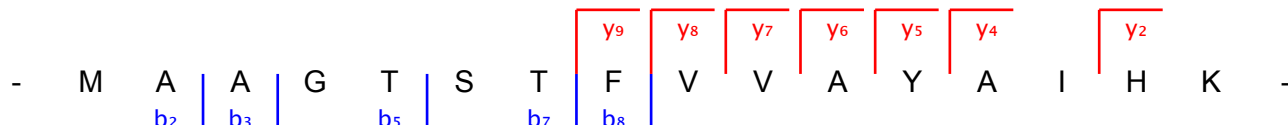

Raw file

20140918\_fract6\_dyn\_5ul\_D6\_01\_373

Scan

29014

Method

TOF; CID

Score

120.15

m/z

587.34

Gene names

GLTSCR1L

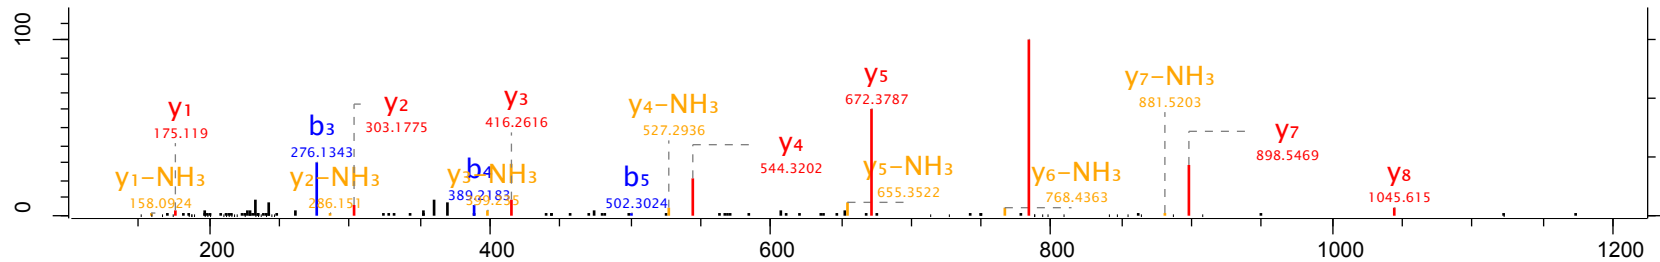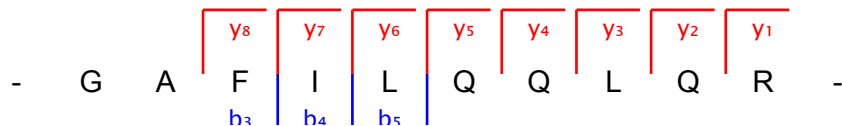

Raw file

20140918\_fract6\_dyn\_5ul\_D6\_01\_373

Scan

31731

Method

TOF; CID

Score

66.77

m/z

908.11

Gene names

CITED2

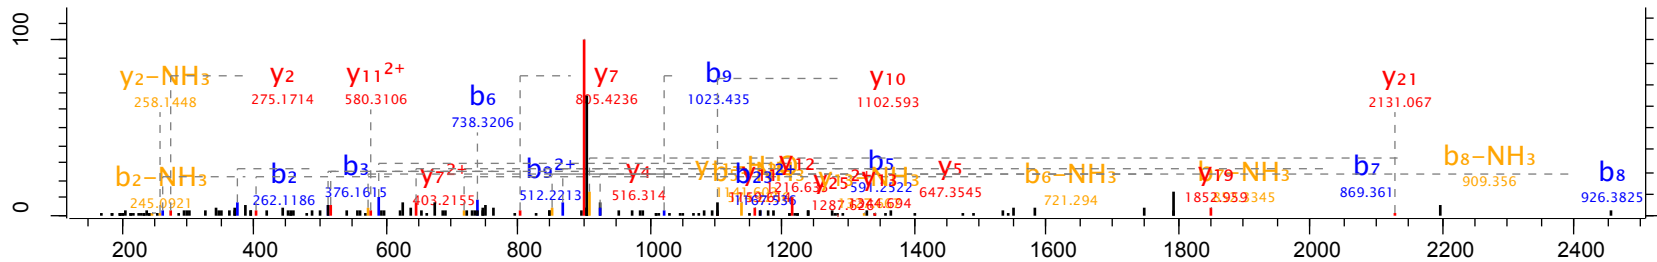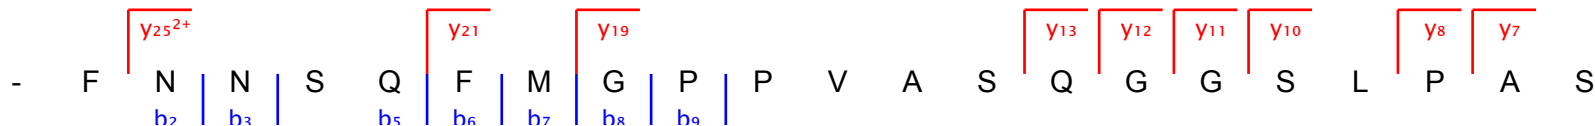



Raw file

Scan

Method

Score

m/z

Gene names

20140918\_fract6\_dyn\_5ul\_D6\_01\_373

38208

TOF; CID

57.24

1235.13

TMEM51

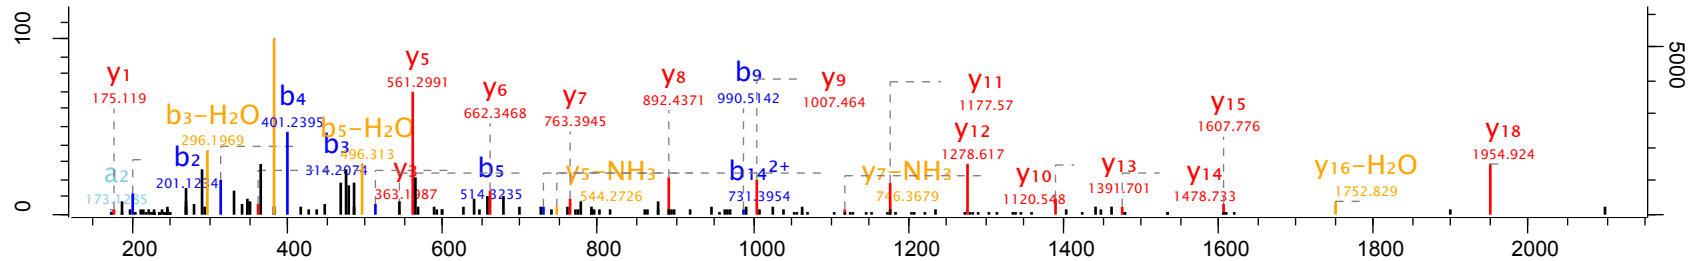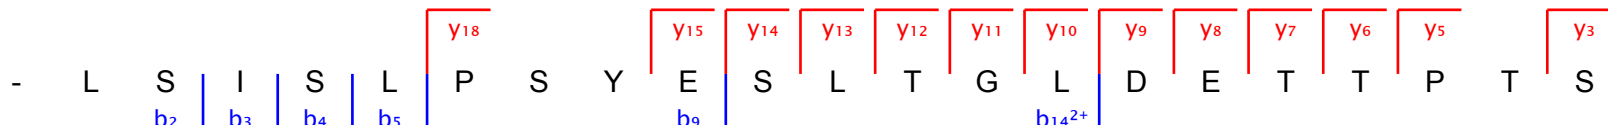

Raw file

20140918\_fract7\_dyn\_5ul\_D7\_01\_393

Scan

8162

Method

TOF; CID

Score

77.89

m/z

629.33

Gene names

CXCR4

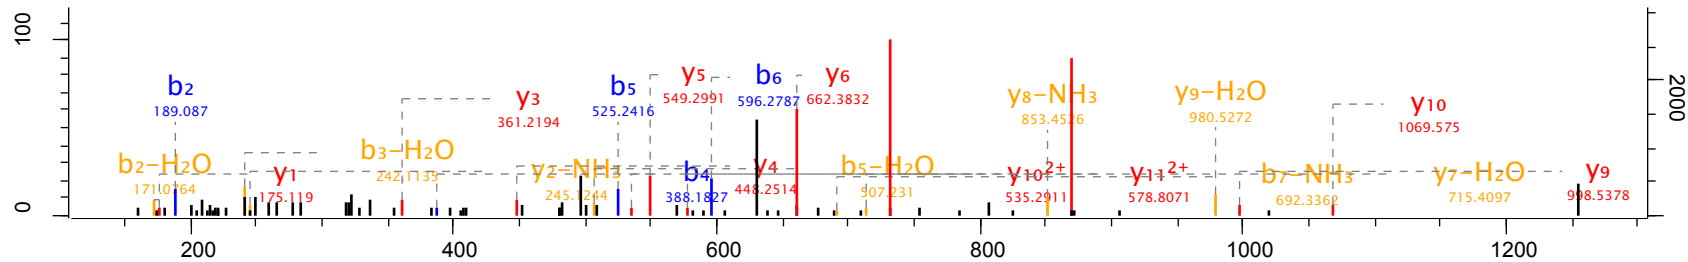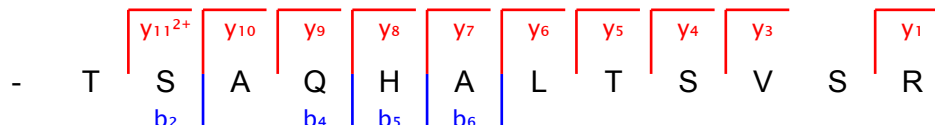

Raw file

20140918\_fract7\_dyn\_5ul\_D7\_01\_393

Scan

9069

Method

TOF; CID

Score

92.86

m/z

704.83

Gene names

TBPL1

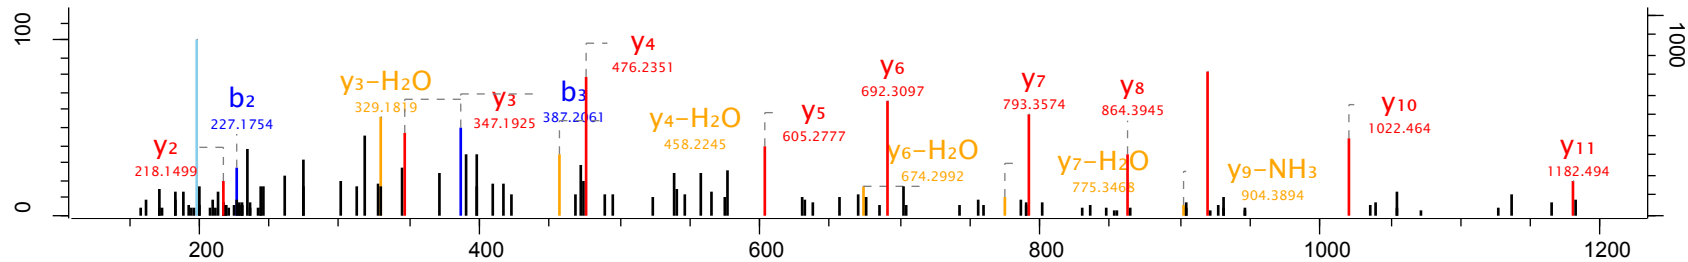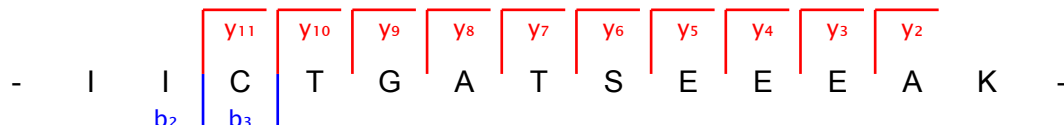

| Raw file                          | Scan  | Method   | Score | m/z    |
|-----------------------------------|-------|----------|-------|--------|
| 20140918_fract7_dyn_5ul_D7_01_393 | 10109 | TOF; CID | 86.9  | 574.31 |

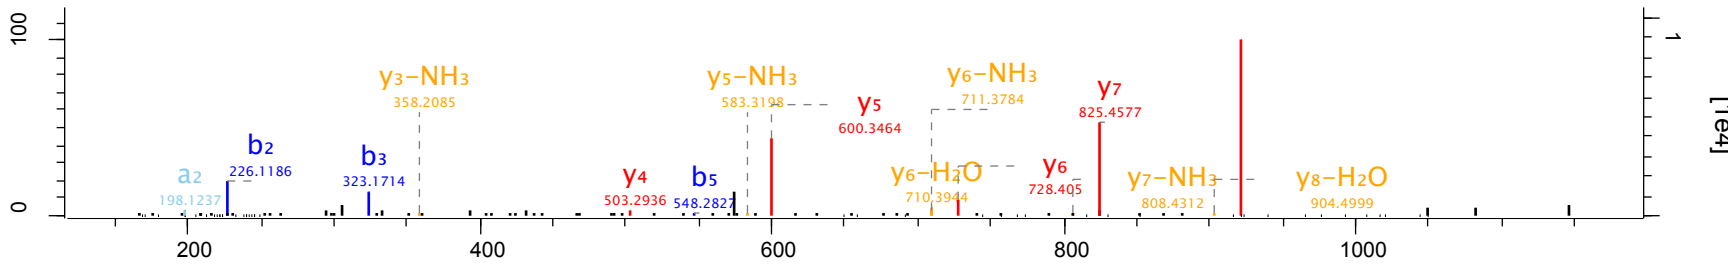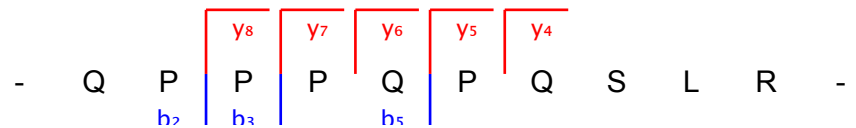

Raw file

20140918\_fract7\_dyn\_5ul\_D7\_01\_393

Scan

10418

Method

TOF; CID

Score

164.97

m/z

513.78

Gene names

SMIM12

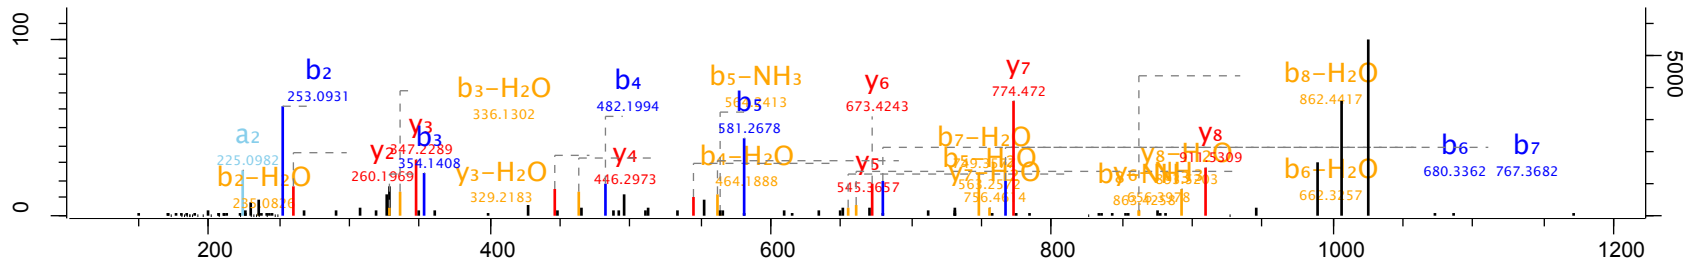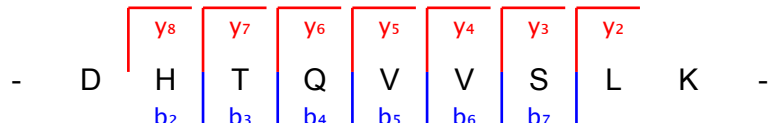

Raw file

20140918\_fract7\_dyn\_5ul\_D7\_01\_393

Scan

11128

Method

TOF; CID

Score

50.9

m/z

491.22

Gene names

JAG2

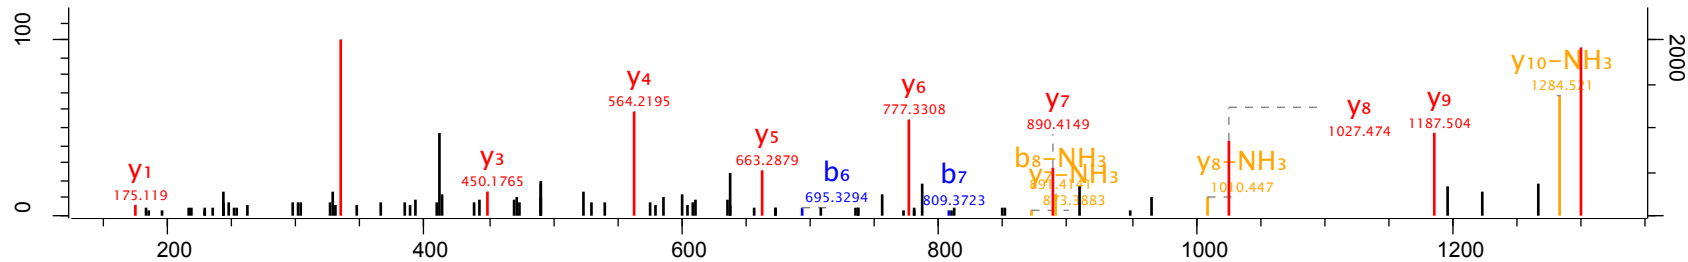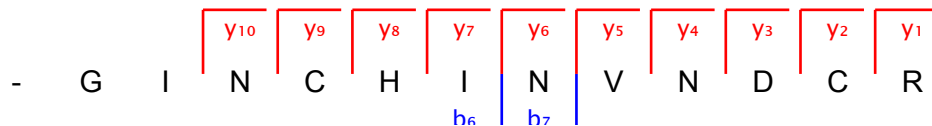

| Raw file                          | Scan  | Method   | Score | m/z    | Gene names |
|-----------------------------------|-------|----------|-------|--------|------------|
| 20140918_fract7_dyn_5ul_D7_01_393 | 12131 | TOF; CID | 40.97 | 690.35 | DMTF1      |

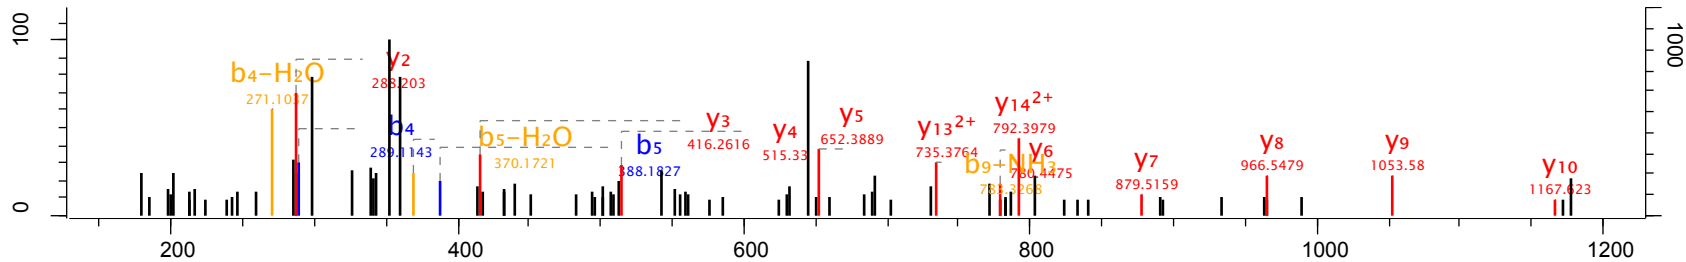

- S G S G V P N S N T N S S V Q H V Q I R -  
 | |  
 b<sub>4</sub> b<sub>5</sub>

y<sub>14</sub><sup>2+</sup> y<sub>13</sub><sup>2+</sup> y<sub>10</sub> y<sub>9</sub> y<sub>8</sub> y<sub>7</sub> y<sub>6</sub> y<sub>5</sub> y<sub>4</sub> y<sub>3</sub> y<sub>2</sub>

Raw file

20140918\_fract7\_dyn\_5ul\_D7\_01\_393

Scan

12235

Method

TOF; CID

Score

73.44

m/z

621.84

Gene names

TAF12

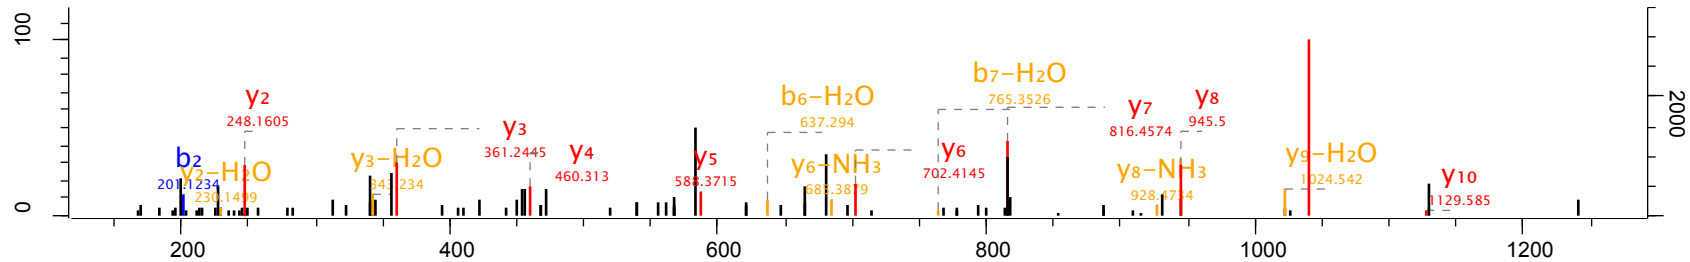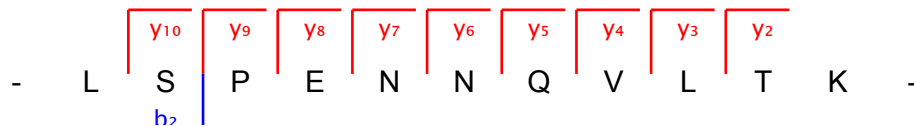



Raw file

20140918\_fract7\_dyn\_5ul\_D7\_01\_393

Scan

14172

Method

TOF; CID

Score

127.84

m/z

454.74

Gene names

KCNIP3

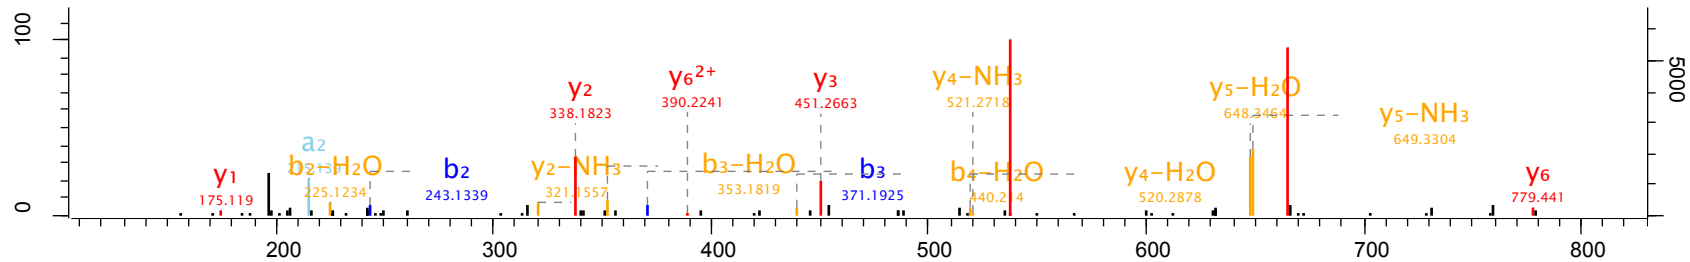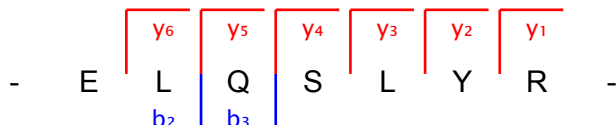

| Raw file                          | Scan  | Method   | Score | m/z    | Gene names |
|-----------------------------------|-------|----------|-------|--------|------------|
| 20140918_fract7_dyn_5ul_D7_01_393 | 17342 | TOF; CID | 94.31 | 598.29 | PIGC       |

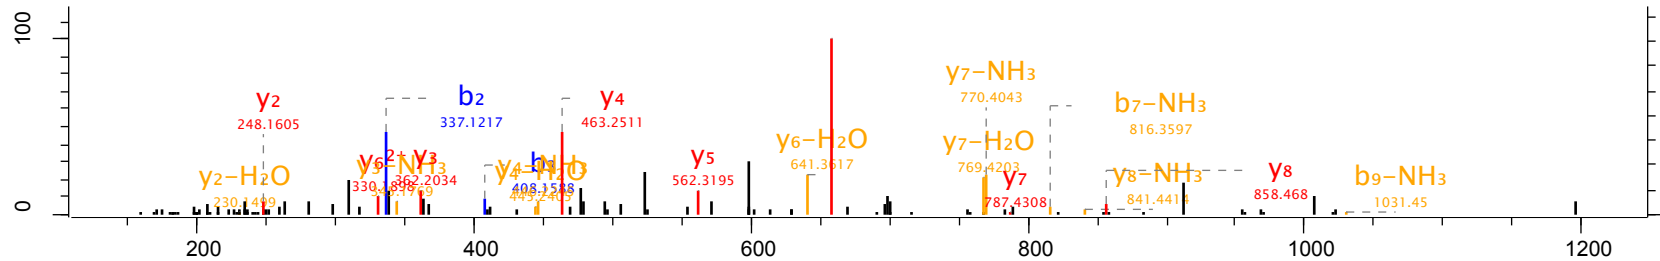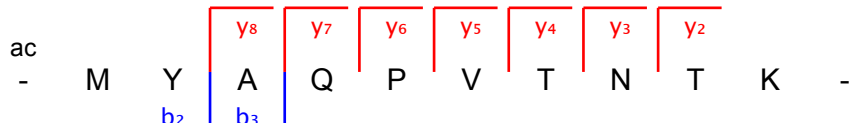

| Raw file                          | Scan  | Method   | Score | m/z    | Gene names |
|-----------------------------------|-------|----------|-------|--------|------------|
| 20140918_fract7_dyn_5ul_D7_01_393 | 17482 | TOF; CID | 93.56 | 585.83 | DAGLA      |

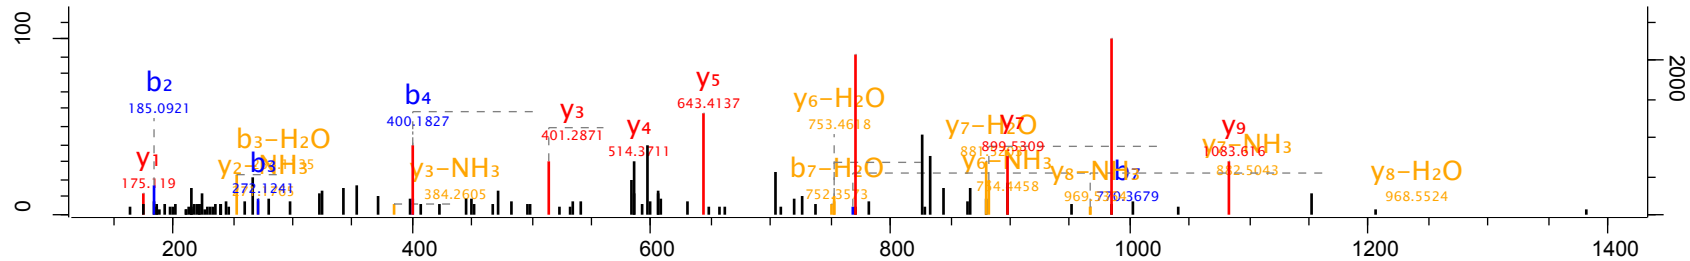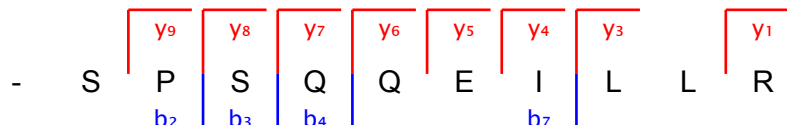

| Raw file                          | Scan  | Method   | Score | m/z    | Gene names |
|-----------------------------------|-------|----------|-------|--------|------------|
| 20140918_fract7_dyn_5ul_D7_01_393 | 19337 | TOF; CID | 73.93 | 799.01 | PGAP3      |

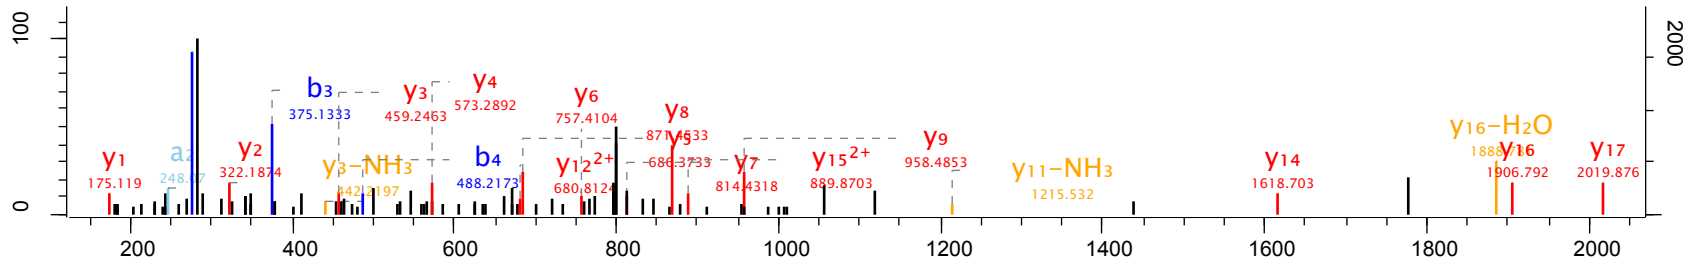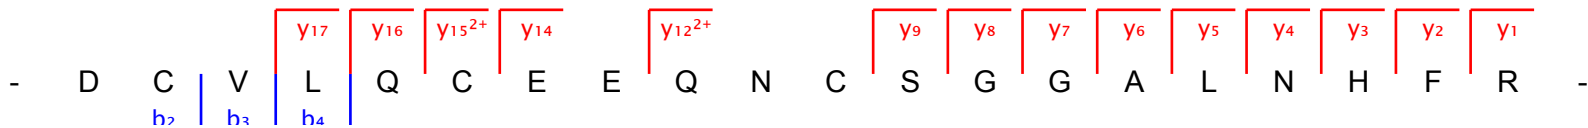

Raw file

20140918\_fract7\_dyn\_5ul\_D7\_01\_393

Scan

22550

Method

TOF; CID

Score

81.7

m/z

800.37

Gene names

CTNNBIP1

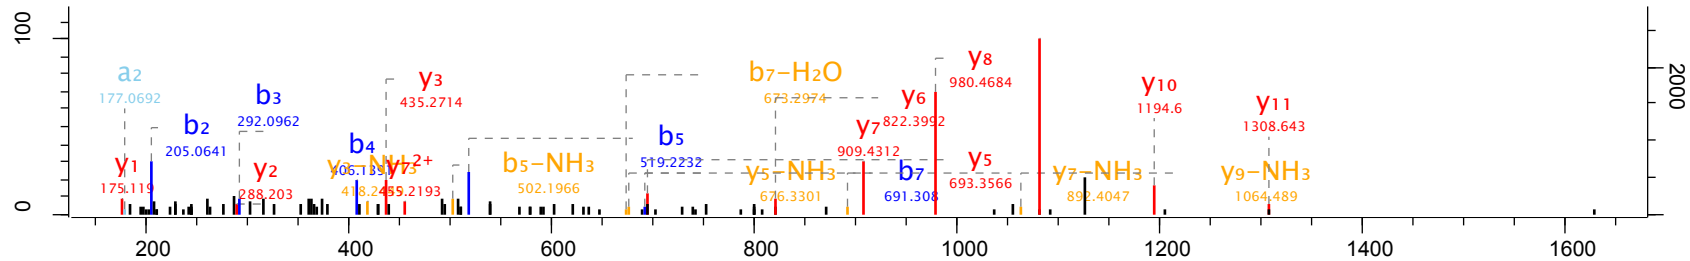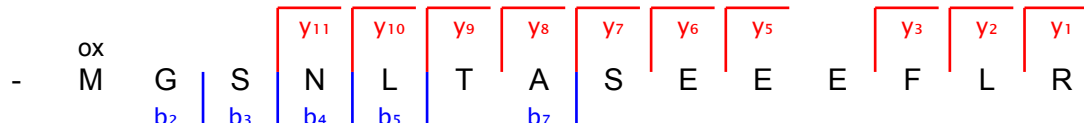

| Raw file                          | Scan  | Method   | Score | m/z    | Gene names |
|-----------------------------------|-------|----------|-------|--------|------------|
| 20140918_fract7_dyn_5ul_D7_01_393 | 22807 | TOF; CID | 78.96 | 692.86 | PLEKHO2    |

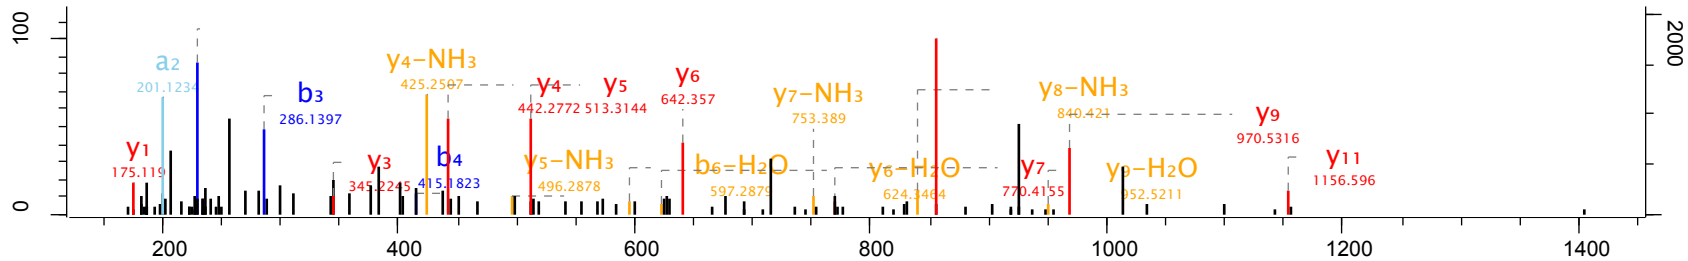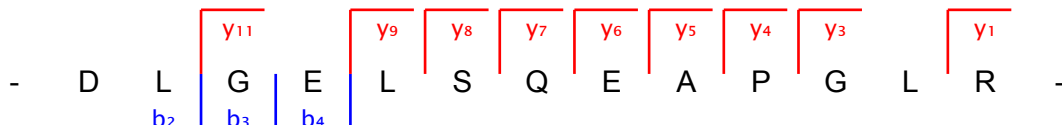

| Raw file                          | Scan  | Method   | Score | m/z    | Gene names |
|-----------------------------------|-------|----------|-------|--------|------------|
| 20140918_fract7_dyn_5ul_D7_01_393 | 23603 | TOF; CID | 75.74 | 490.76 | LAPTM4A    |

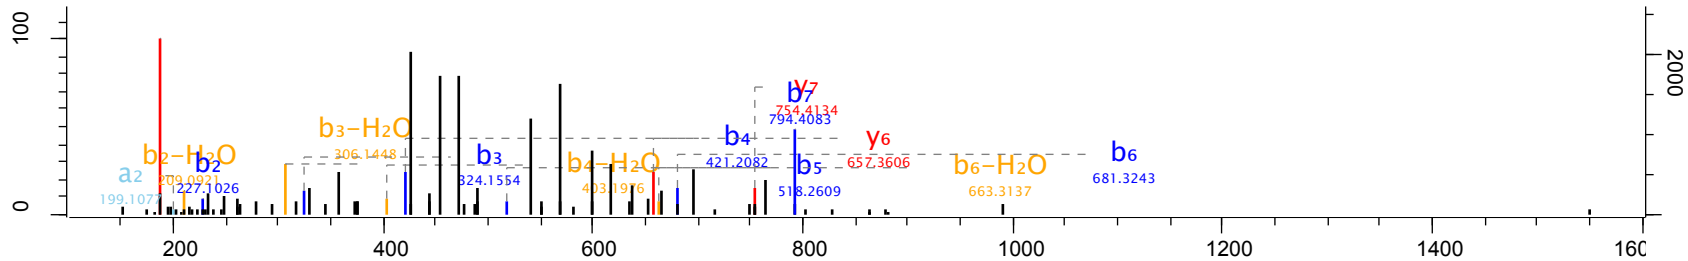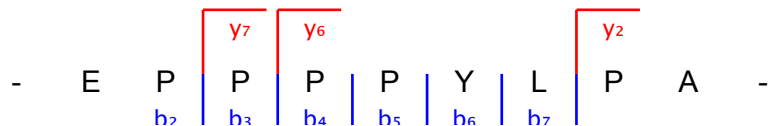

Raw file

20140918\_fract7\_dyn\_5ul\_D7\_01\_393

Scan

24511

Method

TOF; CID

Score

90.83

m/z

603.31

Gene names

TAF13

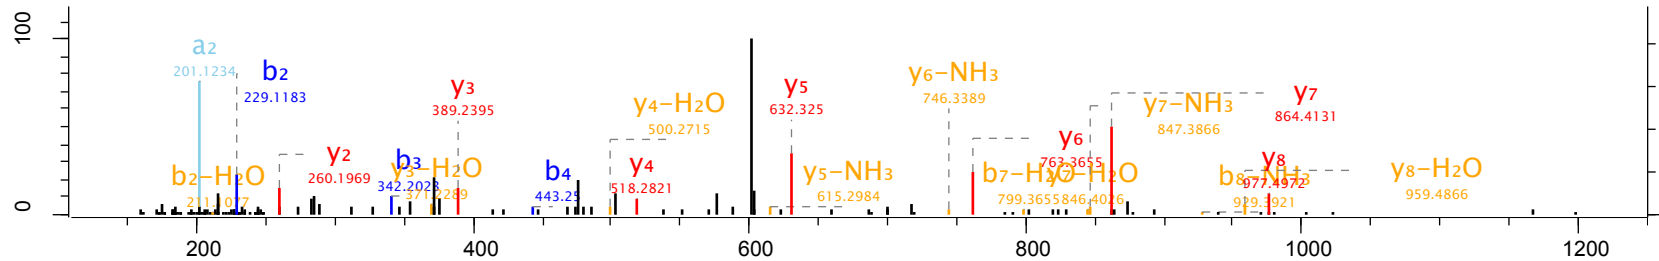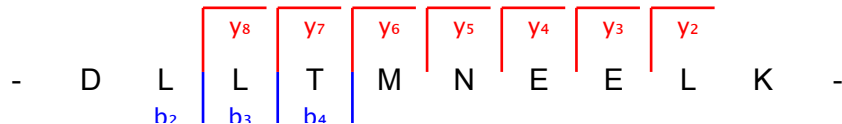



Raw file Scan Method Score m/z Gene names  
20140918\_fract7\_dyn\_5ul\_D7\_01\_393 26476 TOF; CID 100.45 946.97 PAGE1

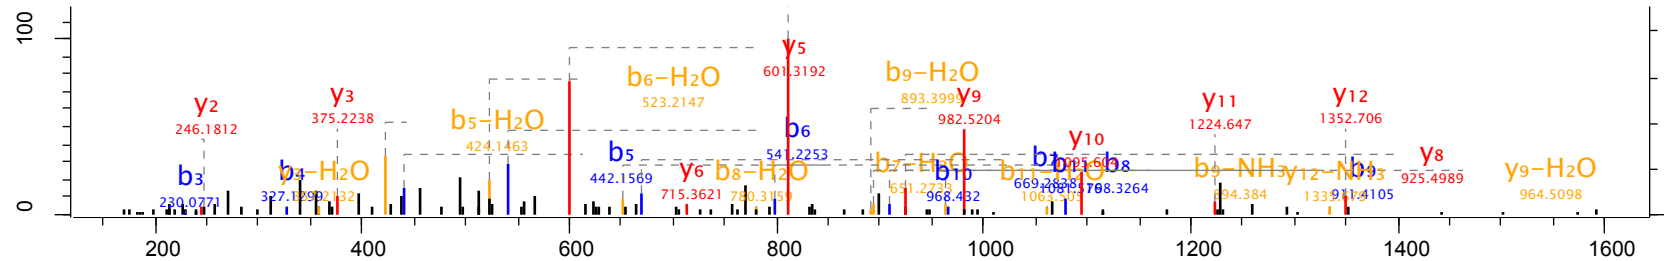

- G D G P D V Q E L G L P N P E E V K -

b3 | b4 | b5 | b6 | b7 | b8 | b9 | b10 | b11 |

y12 | y11 | y10 | y9 | y8 | y7 | y6 | y5 | y3 | y2

| Raw file                          | Scan  | Method   | Score | m/z   | Gene names |
|-----------------------------------|-------|----------|-------|-------|------------|
| 20140918_fract7_dyn_5ul_D7_01_393 | 26855 | TOF; CID | 52.53 | 778.4 | TBC1D16    |

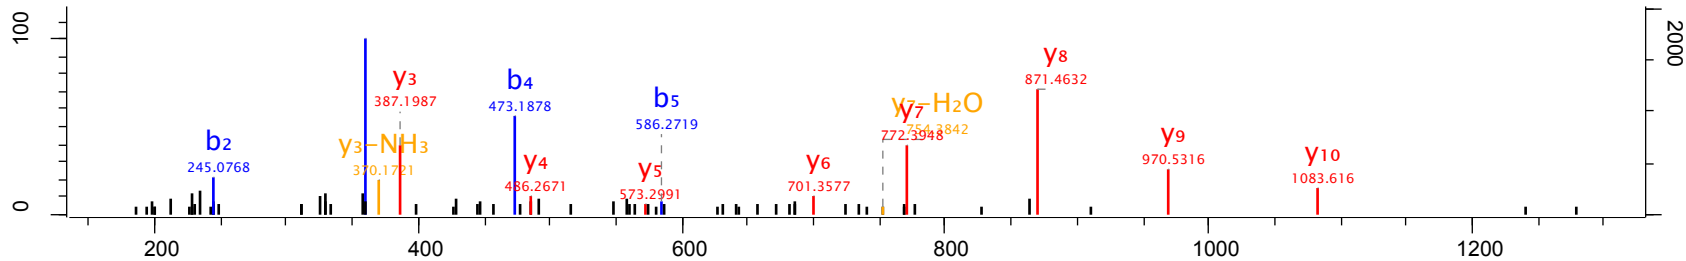

- D E D I L V V A Q S V P D R -

b<sub>2</sub> | b<sub>3</sub> | b<sub>4</sub> | b<sub>5</sub> |
 y<sub>10</sub> | y<sub>9</sub> | y<sub>8</sub> | y<sub>7</sub> | y<sub>6</sub> | y<sub>5</sub> | y<sub>4</sub> | y<sub>3</sub>

Raw file

20140918\_fract7\_dyn\_5ul\_D7\_01\_393

Scan

27285

Method

TOF; CID

Score

89.36

m/z

837.41

Gene names

GPANK1

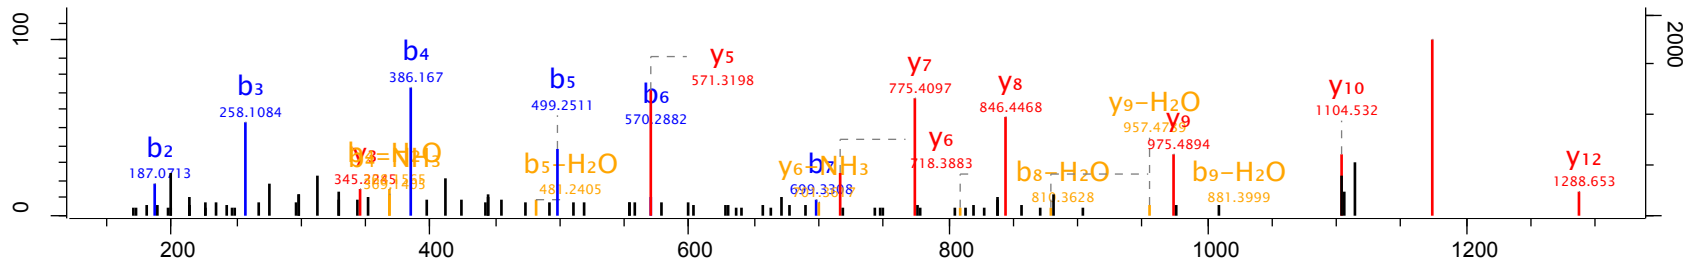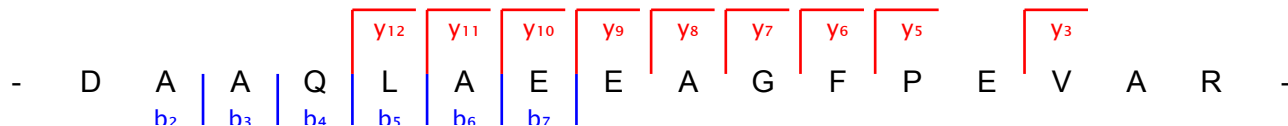

Raw file

20140918\_fract8\_dyn\_5ul\_D8\_01\_394

Scan

6123

Method

TOF; CID

Score

58.1

m/z

481.24

Gene names

ZSCAN21

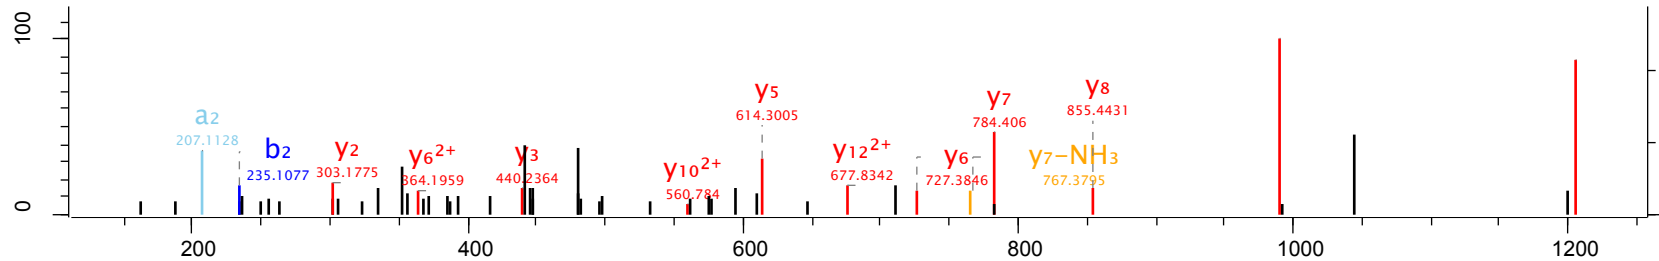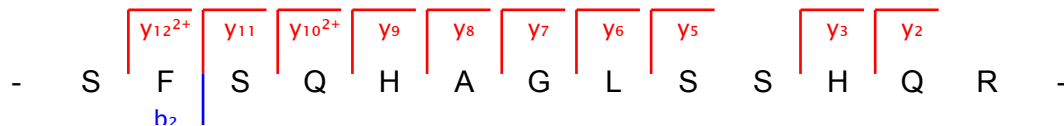

Raw file

20140918\_fract8\_dyn\_5ul\_D8\_01\_394

Scan

9728

Method

TOF; CID

Score

69.19

m/z

613.31

Gene names

THRB

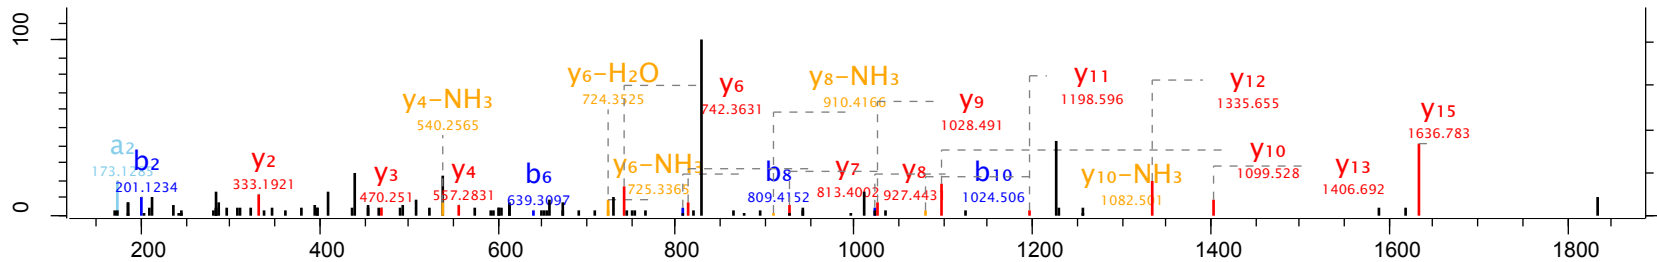

- T V T E A H V A T N A Q G S H W K -

b<sub>2</sub> b<sub>6</sub> b<sub>8</sub> b<sub>10</sub>

y<sub>15</sub> y<sub>13</sub> y<sub>12</sub> y<sub>11</sub> y<sub>10</sub> y<sub>9</sub> y<sub>8</sub> y<sub>7</sub> y<sub>6</sub> y<sub>4</sub> y<sub>3</sub> y<sub>2</sub>

Raw file

20140918\_fract8\_dyn\_5ul\_D8\_01\_394

Scan

10605

Method

TOF; CID

Score

98.52

m/z

436.76

Gene names

RTN1

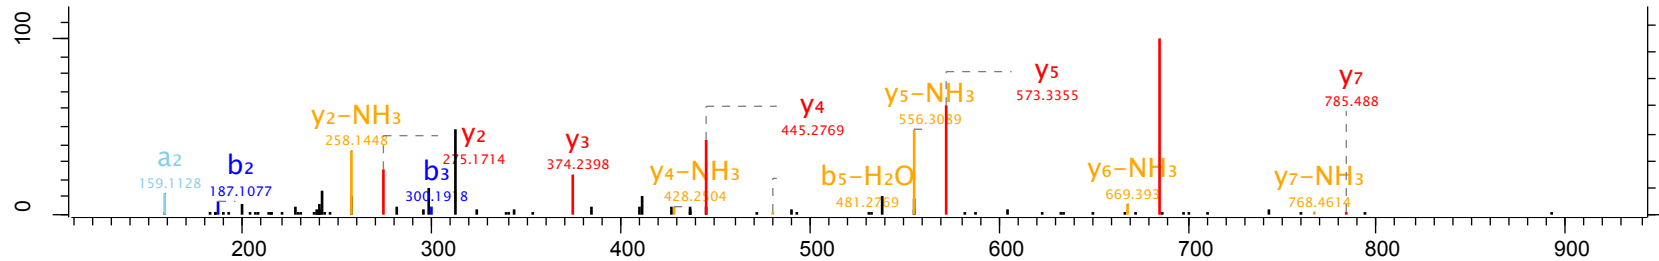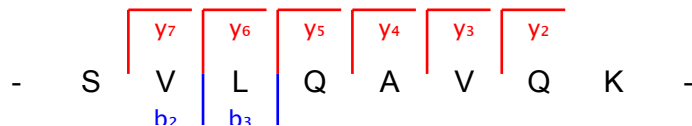

Raw file 20140918\_fract8\_dyn\_5ul\_D8\_01\_394 Scan 14620 Method TOF; CID Score 91.97 m/z 875.42 Gene names TMEM181

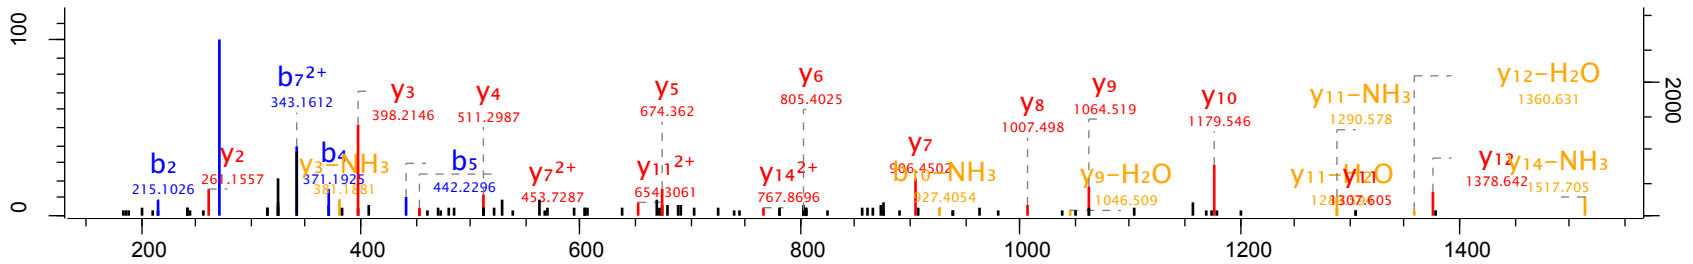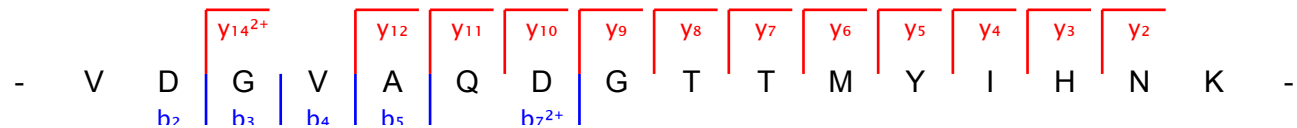

Raw file

20140918\_fract8\_dyn\_5ul\_D8\_01\_394

Scan

16871

Method

TOF; CID

Score

75.57

m/z

439.91

Gene names

PIGP

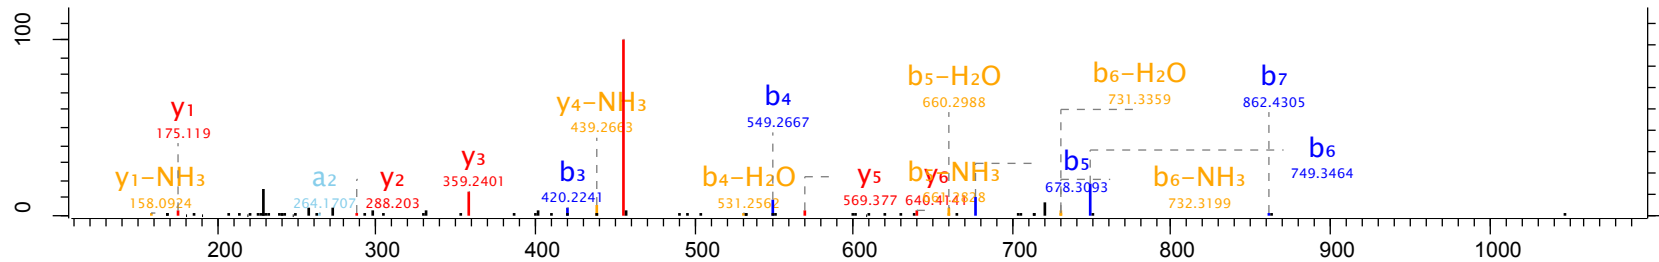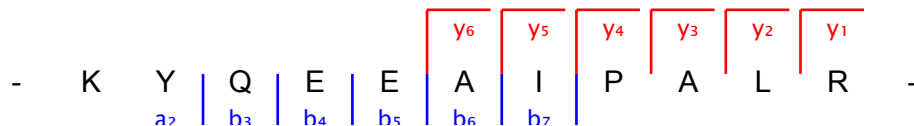



Raw file

20140918\_fract8\_dyn\_5ul\_D8\_01\_394

Scan

16974

Method

TOF; CID

Score

93.44

m/z

566.29

Gene names

C6orf57

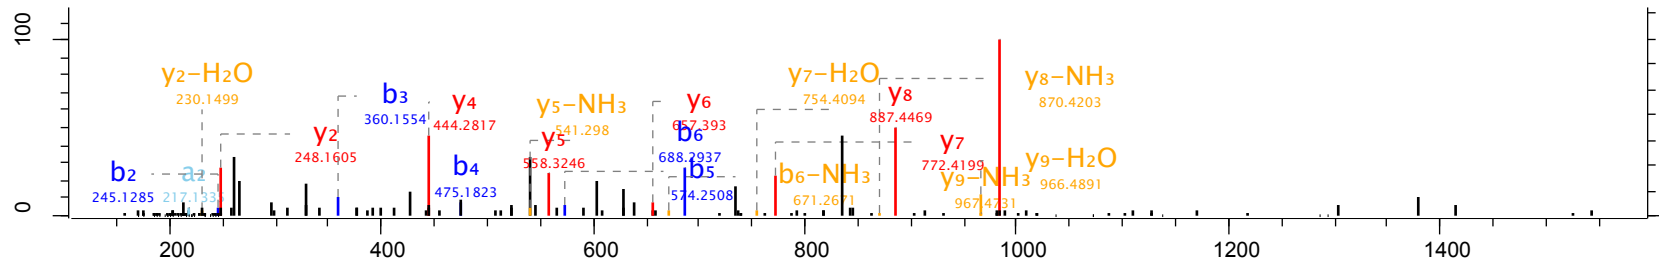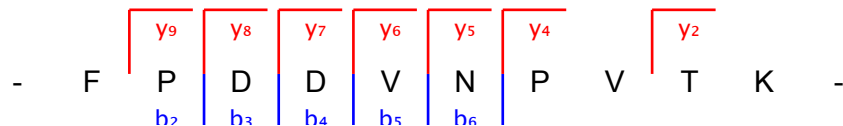

Raw file

20140918\_fract8\_dyn\_5ul\_D8\_01\_394

Scan

17254

Method

TOF; CID

Score

90.15

m/z

517.27

Gene names

CGRRF1

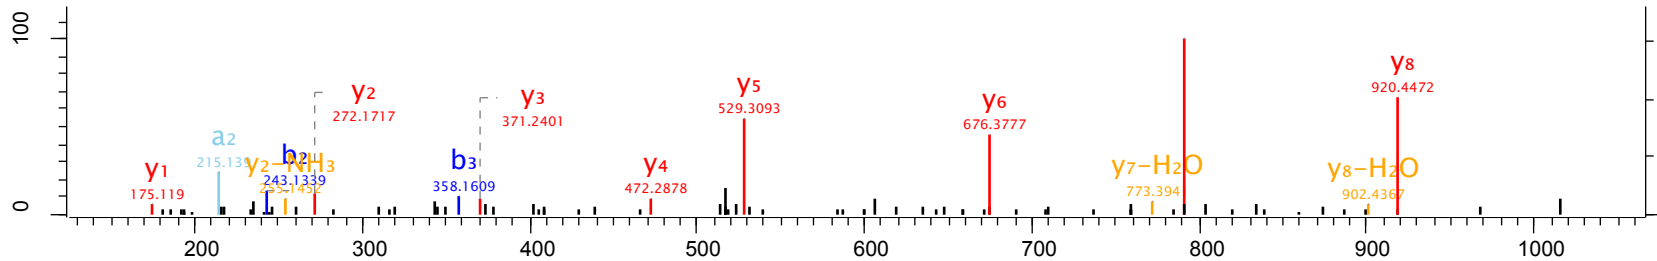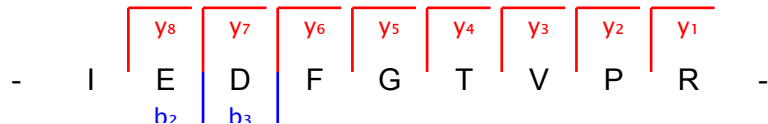

| Raw file                          | Scan  | Method   | Score  | m/z    | Gene names |
|-----------------------------------|-------|----------|--------|--------|------------|
| 20140918_fract8_dyn_5ul_D8_01_394 | 19851 | TOF; CID | 106.36 | 456.76 | LOXHD1     |

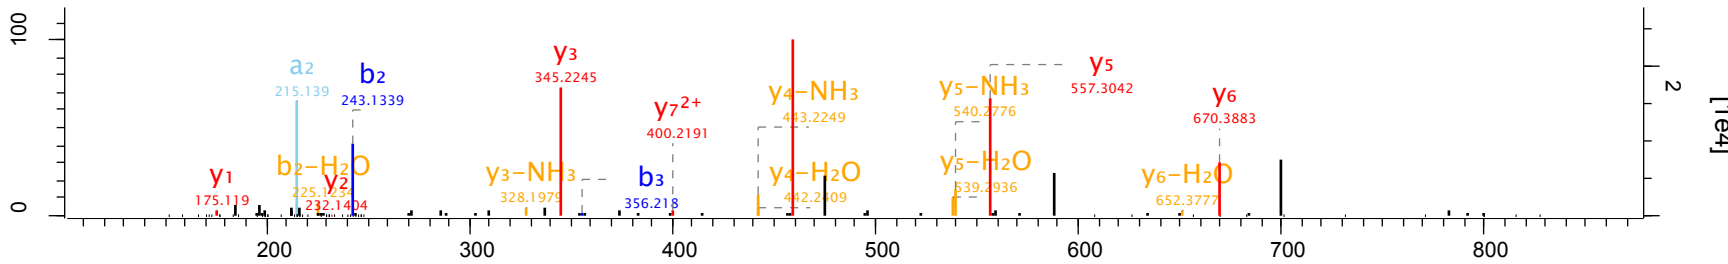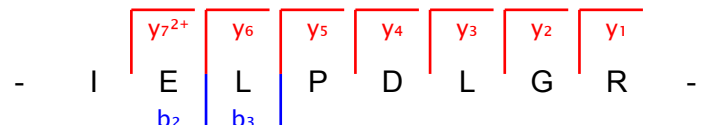

| Raw file                          | Scan  | Method   | Score | m/z    | Gene names |
|-----------------------------------|-------|----------|-------|--------|------------|
| 20140918_fract8_dyn_5ul_D8_01_394 | 22152 | TOF; CID | 57.11 | 670.36 | CSTA       |

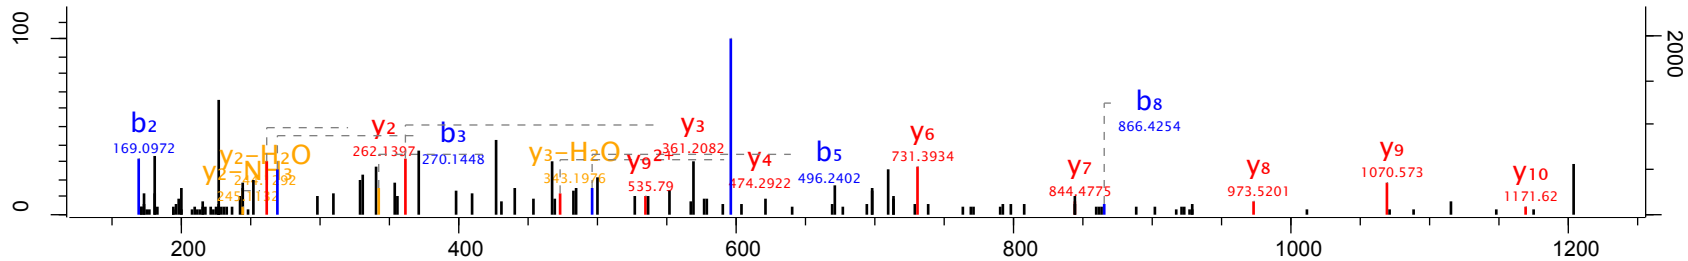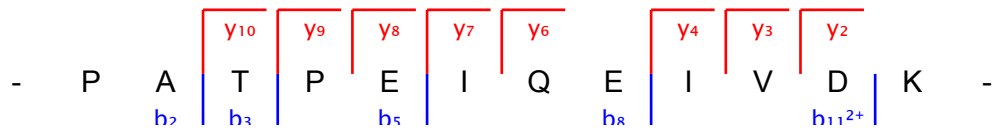

Raw file

20140918\_fract8\_dyn\_5ul\_D8\_01\_394

Scan

23088

Method

TOF; CID

Score

57.53

m/z

789.41

Gene names

CELSR1

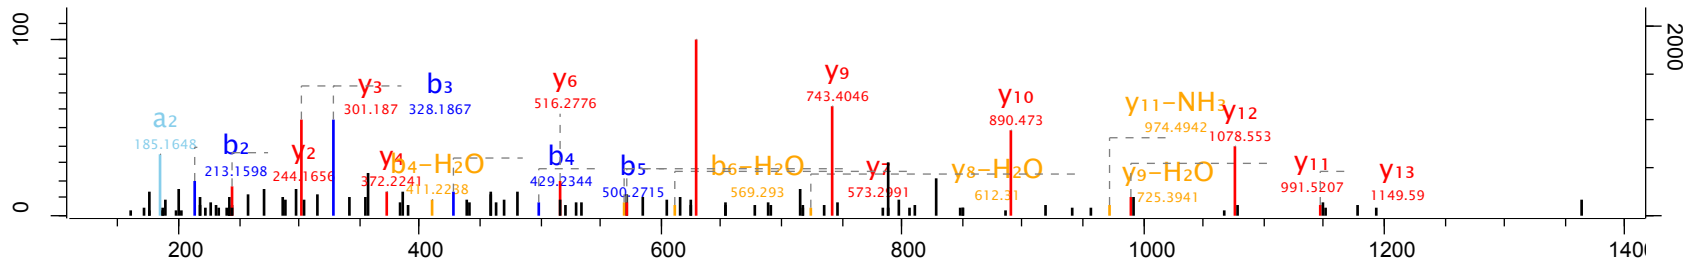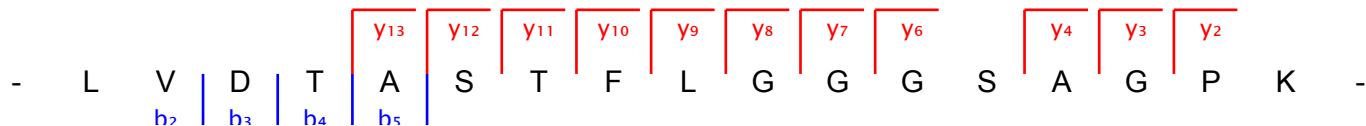

Raw file

20140918\_fract8\_dyn\_5ul\_D8\_01\_394

Scan

23593

Method

TOF; CID

Score

76.28

m/z

595.28

Gene names

RPS3

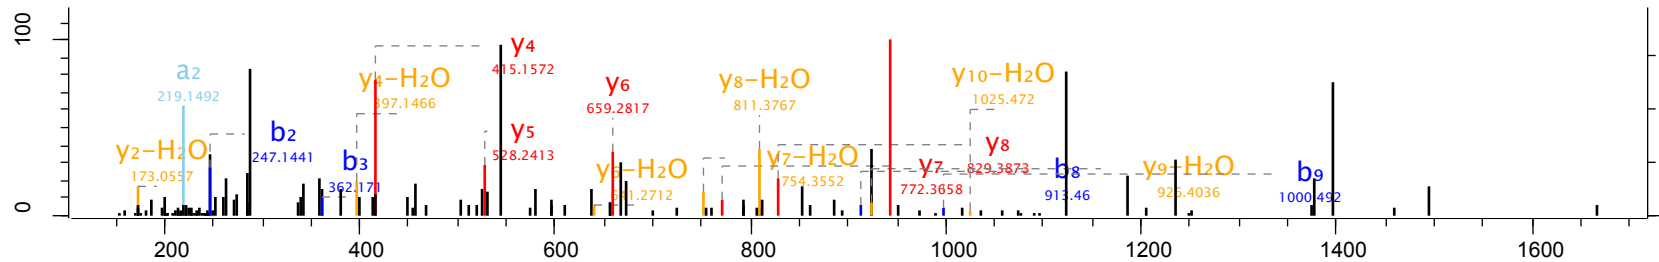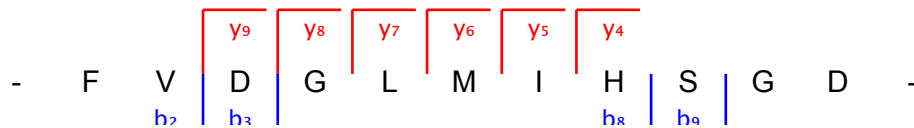

Raw file

20140918\_fract8\_dyn\_5ul\_D8\_01\_394

Scan

23664

Method

TOF; CID

Score

52.32

m/z

676.35

Gene names

ZNF202

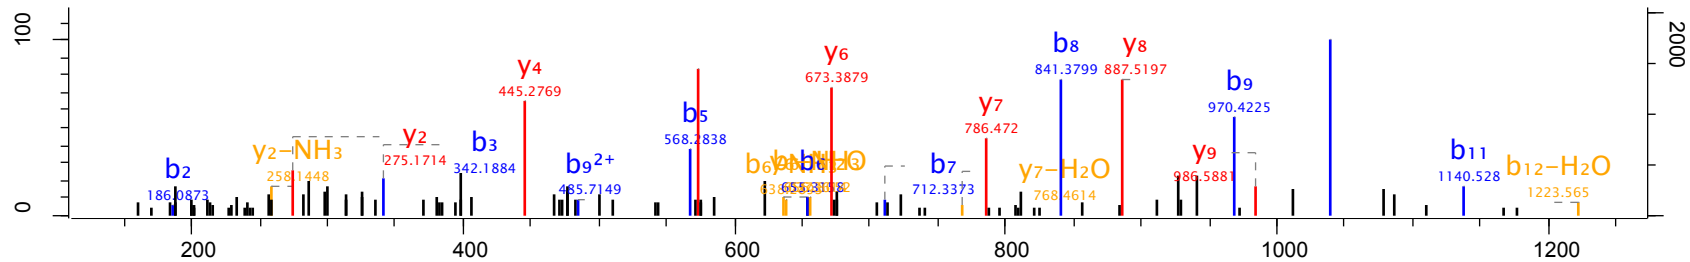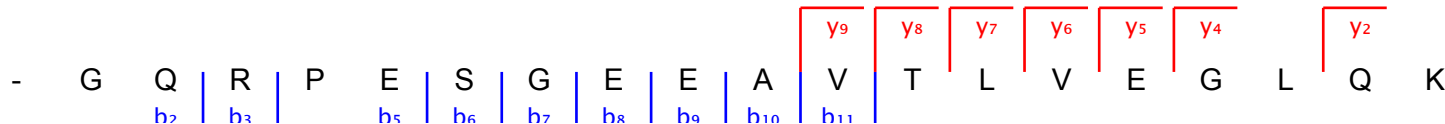

Raw file

20140918\_fract8\_dyn\_5ul\_D8\_01\_394

Scan

27365

Method

TOF; CID

Score

88.98

m/z

1173.05

Gene names

PKIG

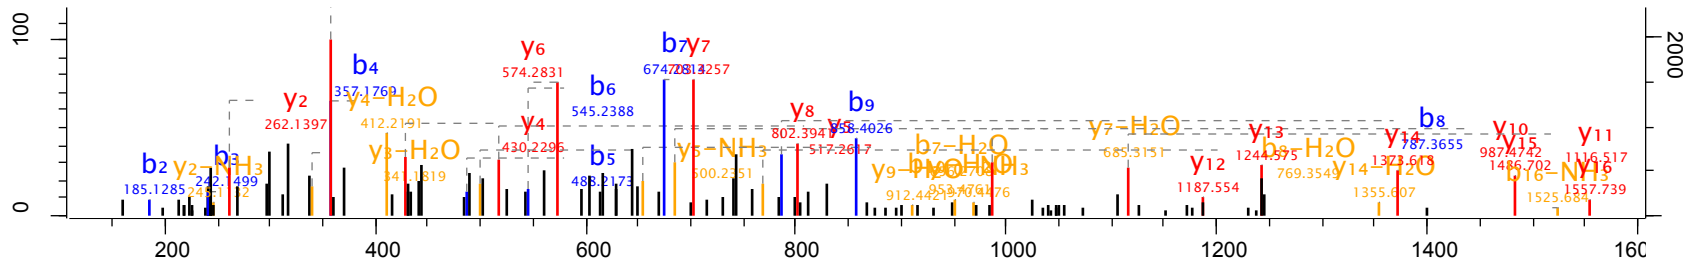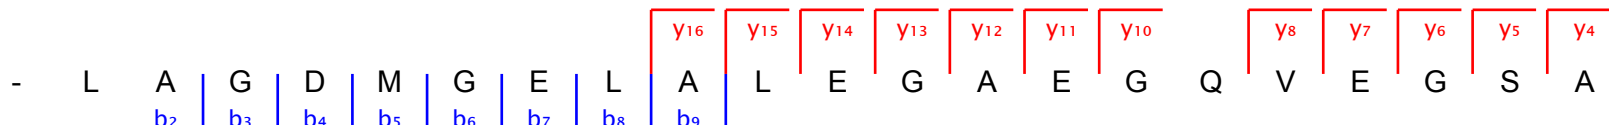



Raw file

20140918\_fract8\_dyn\_5ul\_D8\_01\_394

Scan

30967

Method

TOF; CID

Score

88.6

m/z

606.37

Gene names

FAAP24;C19orf40

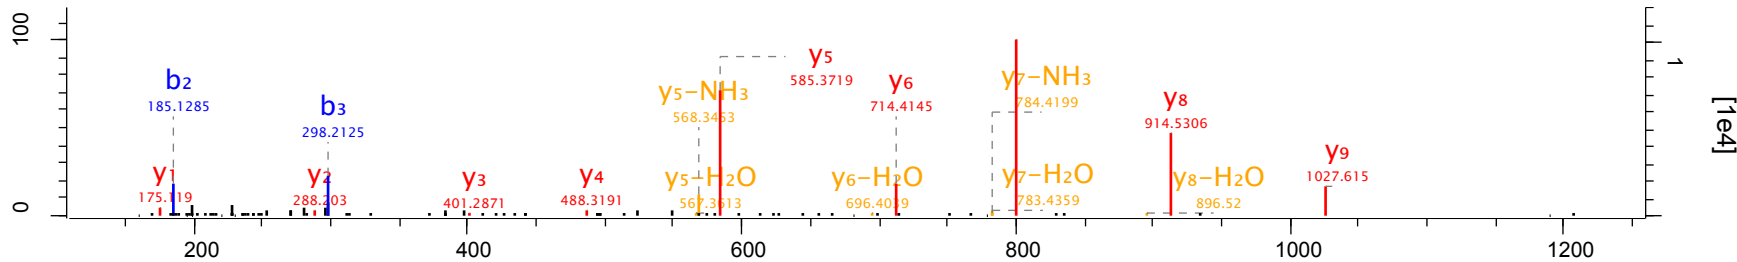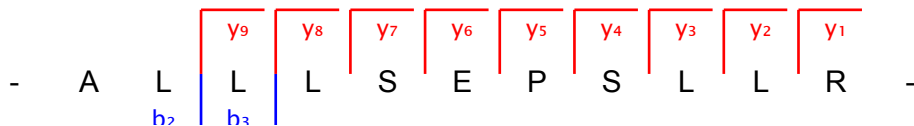

| Raw file                          | Scan  | Method   | Score | m/z    | Gene names |
|-----------------------------------|-------|----------|-------|--------|------------|
| 20140918_fract9_dyn_5ul_E1_01_377 | 10193 | TOF; CID | 189.7 | 475.79 | SMC1B      |

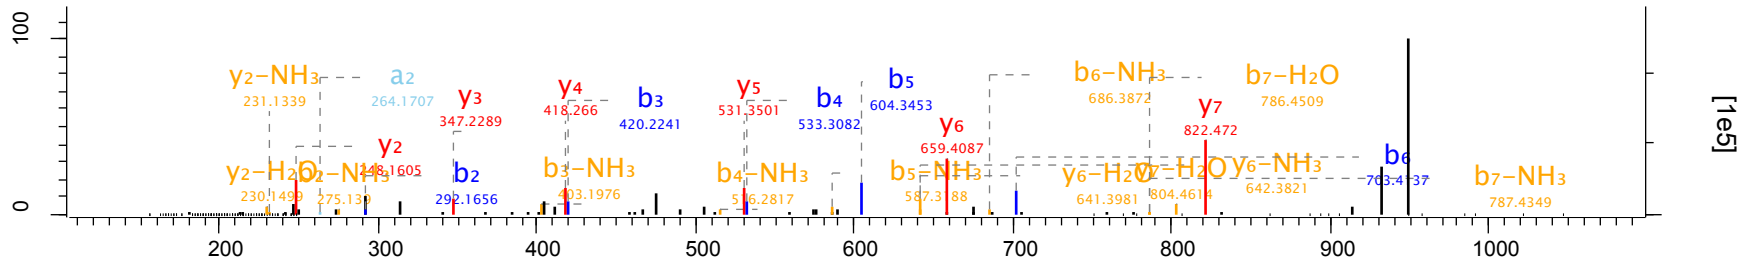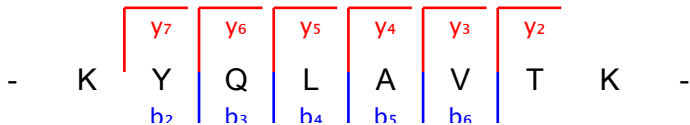

Raw file

20140918\_fract9\_dyn\_5ul\_E1\_01\_377

Scan

14012

Method

TOF; CID

Score

110.38

m/z

600.83

Gene names

SPATA24

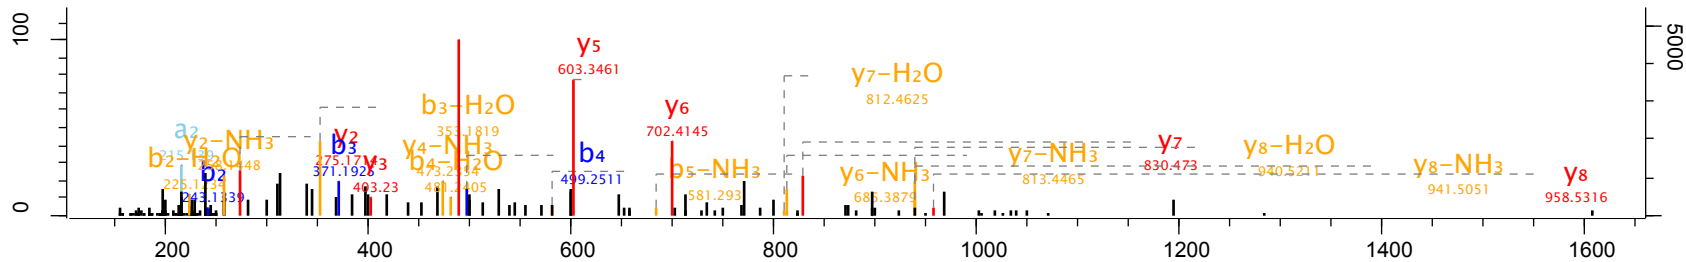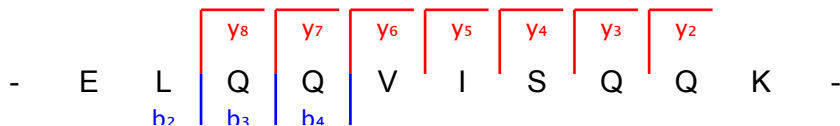

Raw file

20140918\_fract9\_dyn\_5ul\_E1\_01\_377

Scan

15473

Method

TOF; CID

Score

41.91

m/z

599.55

Gene names

COL16A1

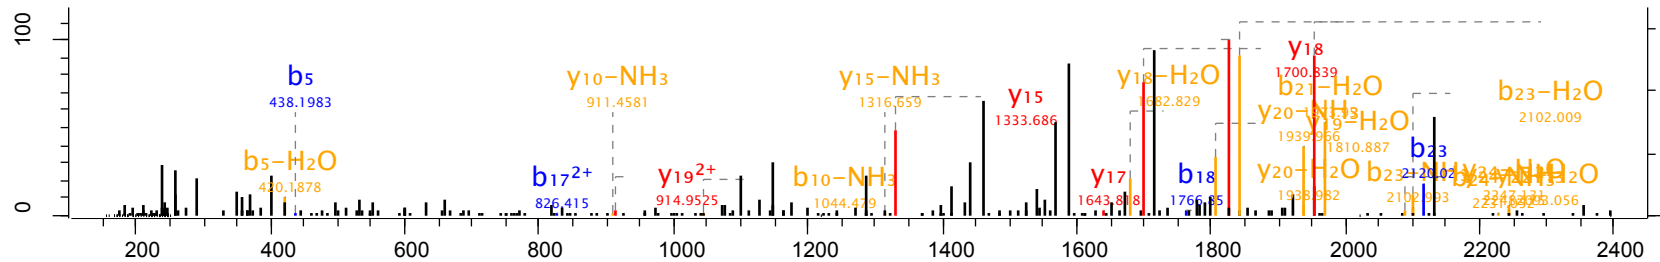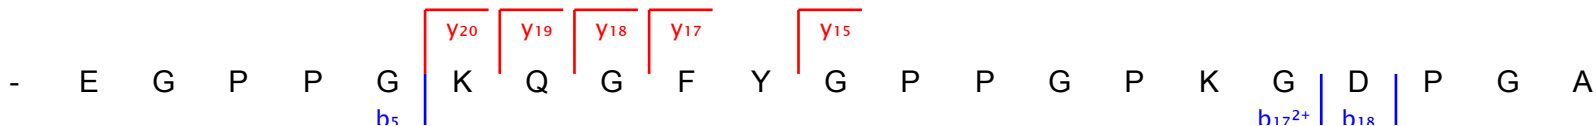

Raw file

20140918\_fract9\_dyn\_5ul\_E1\_01\_377

Scan

16756

Method

TOF; CID

Score

54.95

m/z

564.61

Gene names

PRDM4

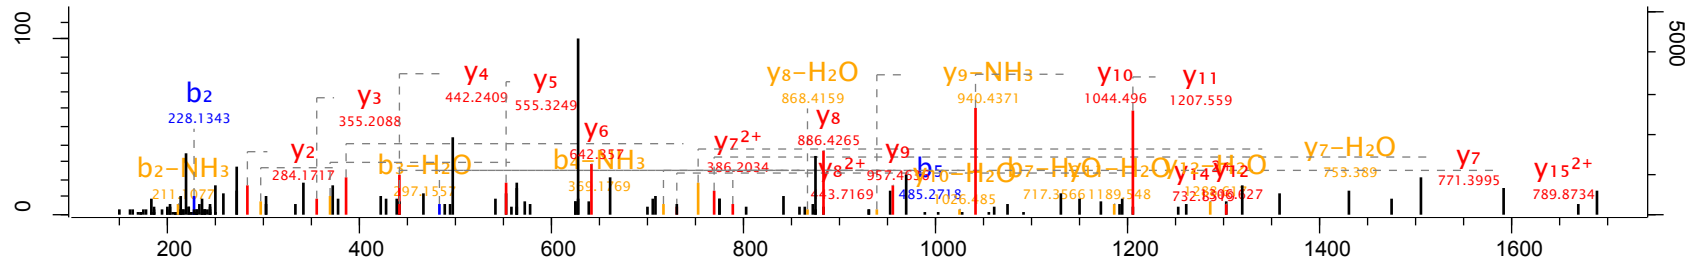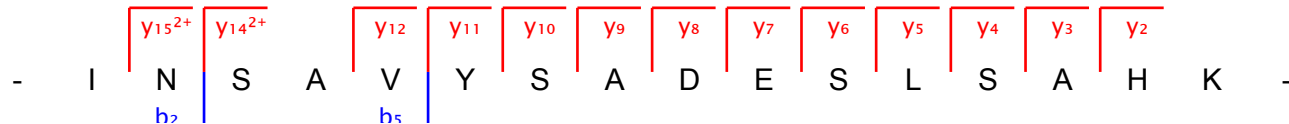

| Raw file                          | Scan  | Method   | Score | m/z    | Gene names |
|-----------------------------------|-------|----------|-------|--------|------------|
| 20140918_fract9_dyn_5ul_E1_01_377 | 18256 | TOF; CID | 94.31 | 513.27 | YIPF4      |

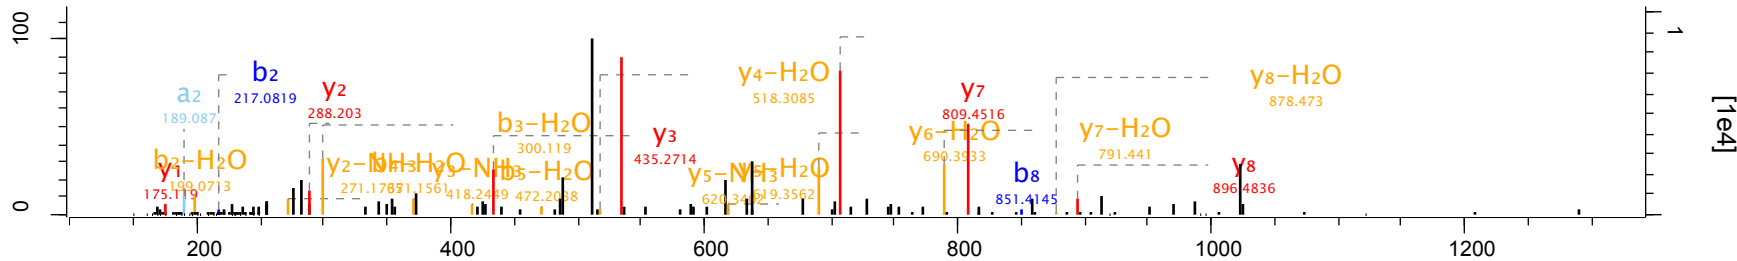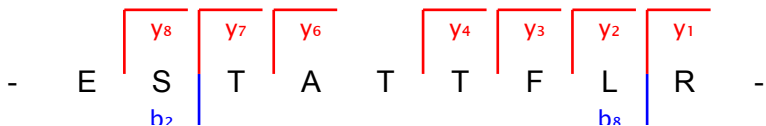

Raw file

20140918\_fract9\_dyn\_5ul\_E1\_01\_377

Scan

19258

Method

TOF; CID

Score

61.24

m/z

627.3

Gene names

TTC31

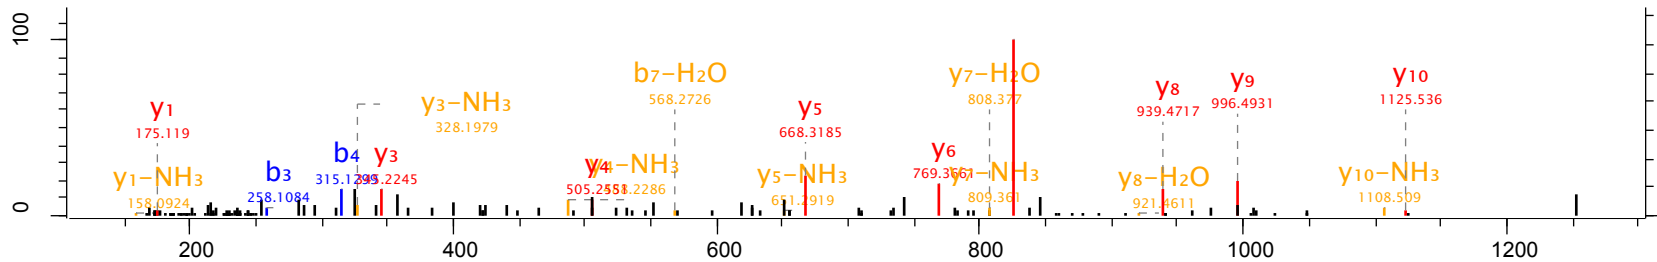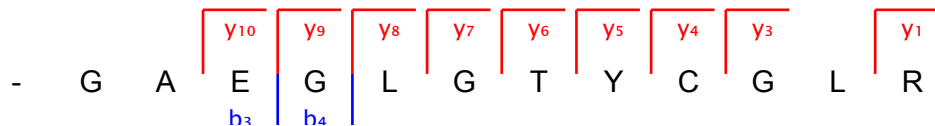

Raw file

20140918\_fract9\_dyn\_5ul\_E1\_01\_377

Scan

19503

Method

TOF; CID

Score

91.87

m/z

538.77

Gene names

TNIP3

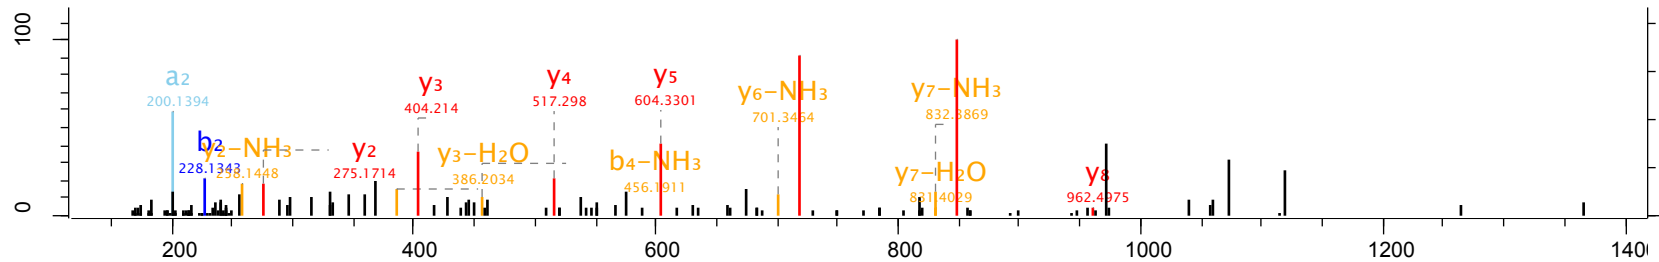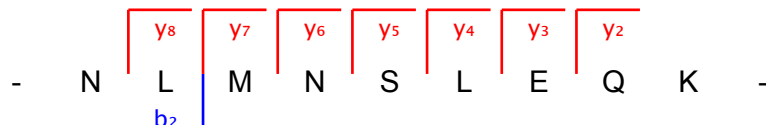



Raw file

20140918\_fract9\_dyn\_5ul\_E1\_01\_377

Scan

20242

Method

TOF; CID

Score

126.07

m/z

525.76

Gene names

SLC35A1

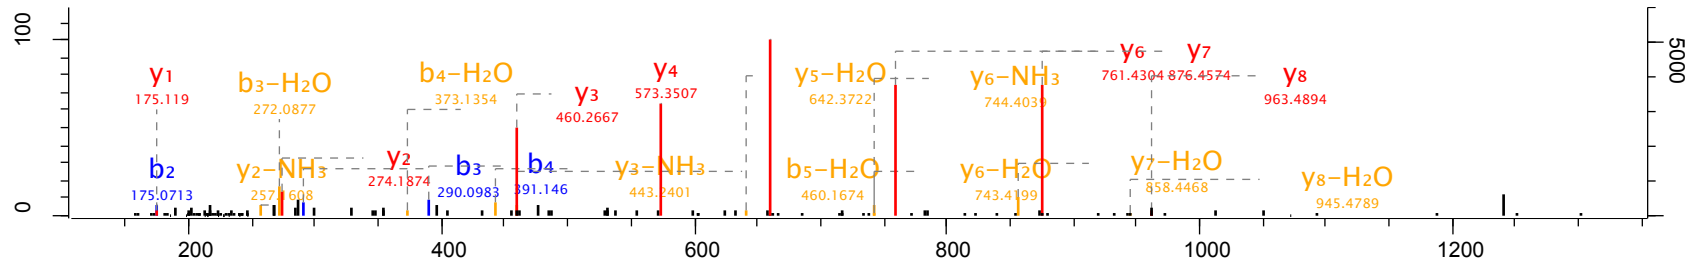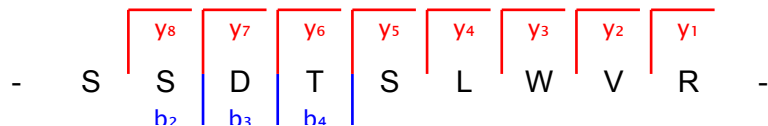

Raw file

20140918\_fract9\_dyn\_5ul\_E1\_01\_377

Scan

20847

Method

TOF; CID

Score

70.94

m/z

572.77

Gene names

ELF3

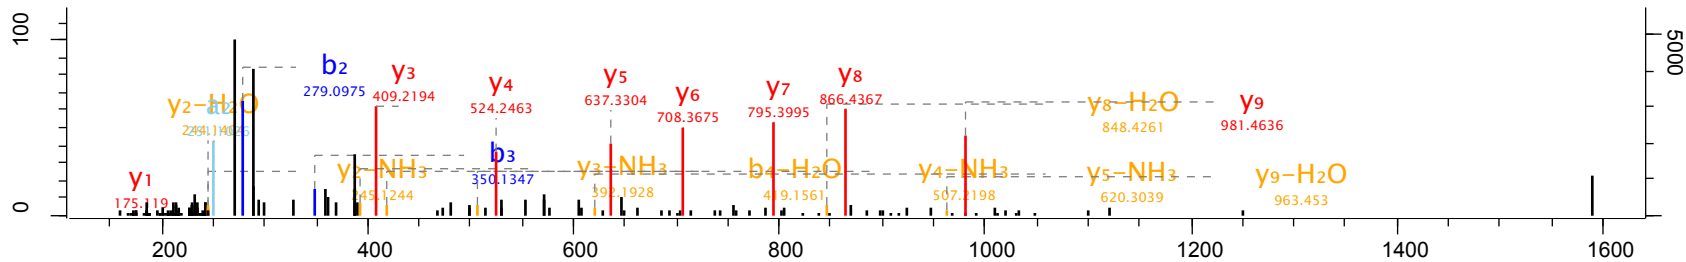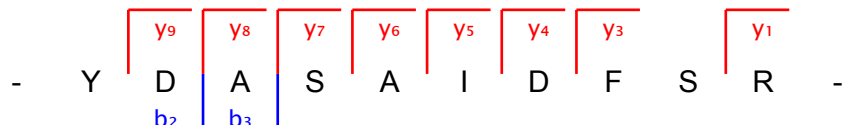

Raw file

20140918\_fract9\_dyn\_5ul\_E1\_01\_377

Scan

21888

Method

TOF; CID

Score

72.29

m/z

698.36

Gene names

TRAIP

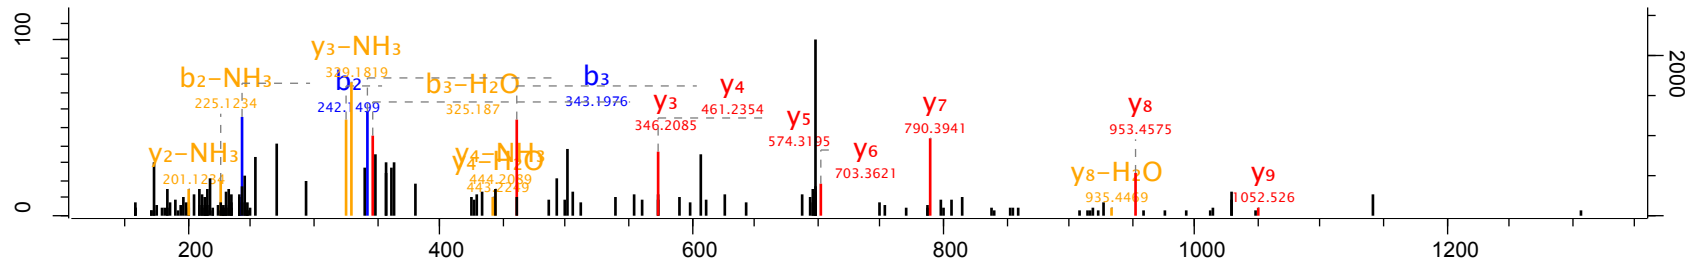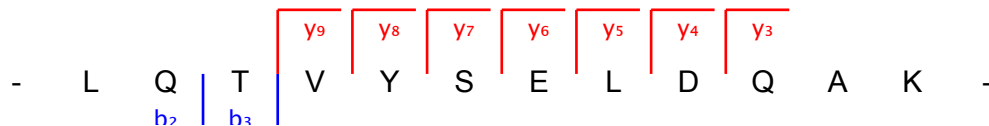

| Raw file                          | Scan  | Method   | Score | m/z     | Gene names |
|-----------------------------------|-------|----------|-------|---------|------------|
| 20140918_fract9_dyn_5ul_E1_01_377 | 21957 | TOF; CID | 99.92 | 1195.56 | PRRG1      |

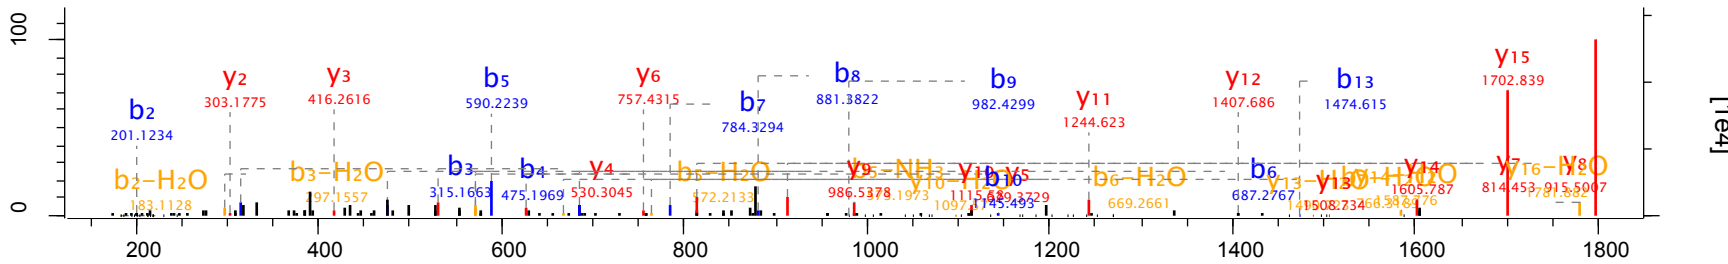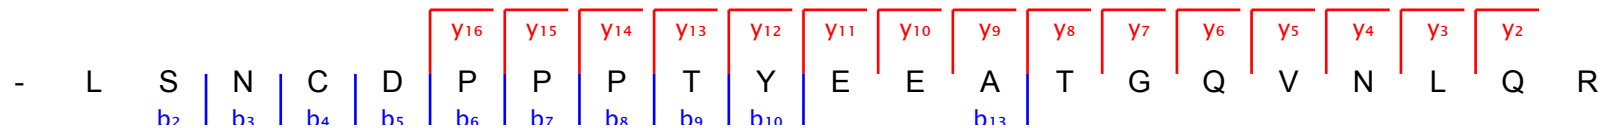

Raw file

20140918\_fract9\_dyn\_5ul\_E1\_01\_377

Scan

26611

Method

TOF; CID

Score

159.14

m/z

889.45

Gene names

SERINC1

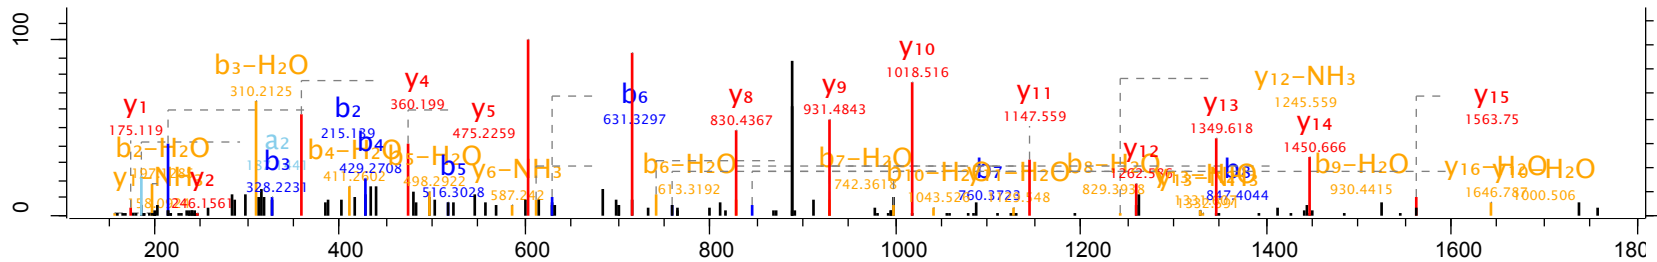

- L T L T S D E S T L I E D G G A R -  
 b<sub>2</sub> b<sub>3</sub> b<sub>4</sub> b<sub>5</sub> b<sub>6</sub> b<sub>7</sub> b<sub>8</sub> y<sub>15</sub> y<sub>14</sub> y<sub>13</sub> y<sub>12</sub> y<sub>11</sub> y<sub>10</sub> y<sub>9</sub> y<sub>8</sub> y<sub>7</sub> y<sub>6</sub> y<sub>5</sub> y<sub>4</sub> y<sub>2</sub> y<sub>1</sub>

| Raw file                          | Scan  | Method   | Score | m/z   | Gene names |
|-----------------------------------|-------|----------|-------|-------|------------|
| 20140918_fract9_dyn_5ul_E1_01_377 | 29824 | TOF; CID | 59.23 | 827.4 | SYCP1      |

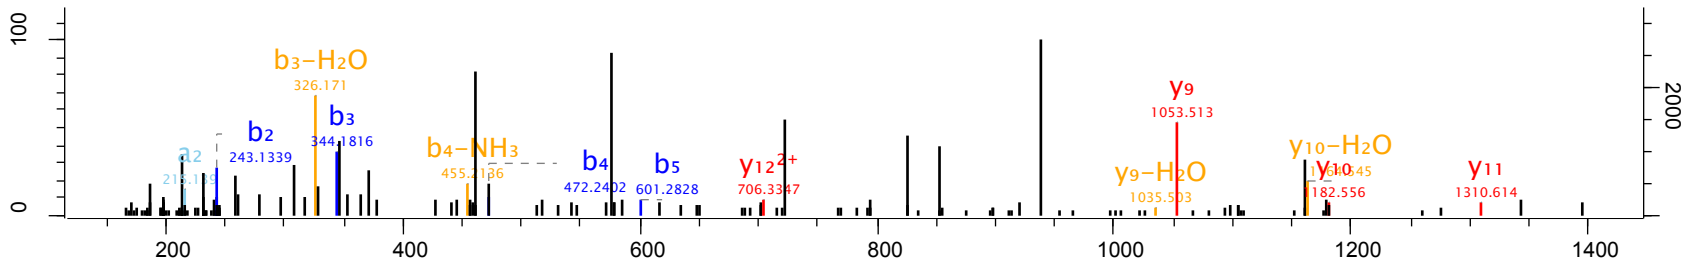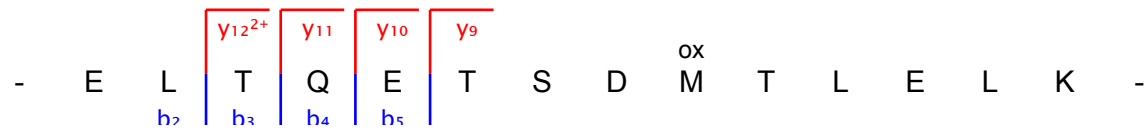

Raw file

20140918\_fract9\_dyn\_5ul\_E1\_01\_377

Scan

30984

Method

TOF; CID

Score

90.05

m/z

624.86

Gene names

RITA1

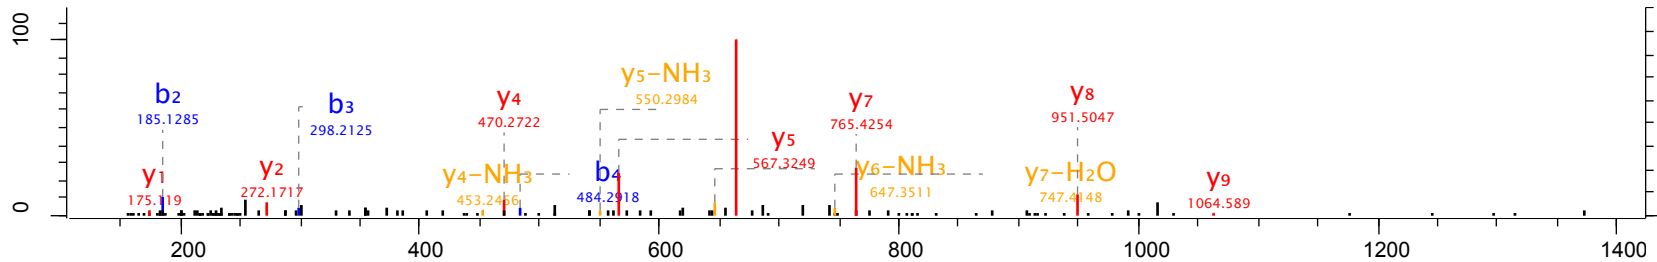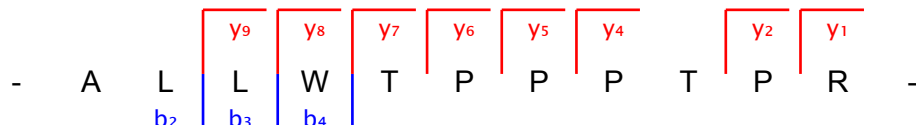

Raw file

Scan

Method

Score

m/z

Gene names

20140918\_fract9\_dyn\_5ul\_E1\_01\_377

34039

TOF; CID

46.27

1196.09

PEX2

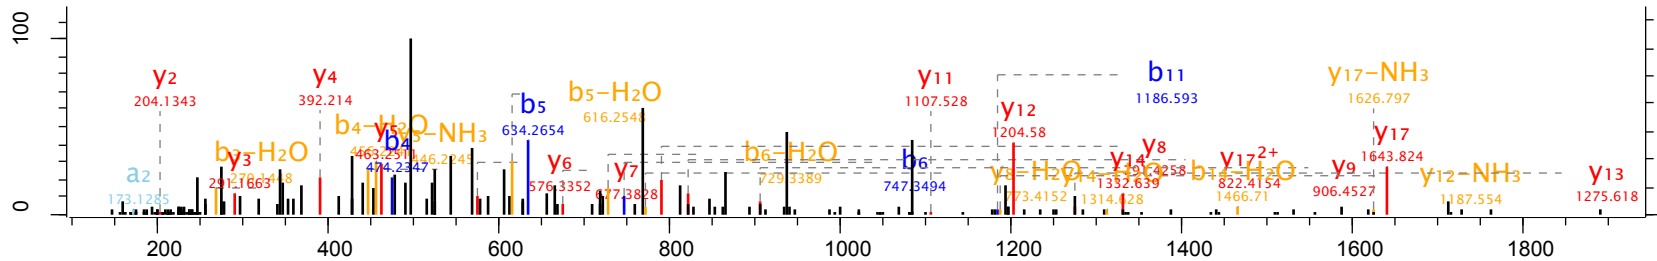

- L S S W C I P L T G A P N S D N T L A T S

a<sub>2</sub> b<sub>4</sub> b<sub>5</sub> b<sub>6</sub> b<sub>11</sub> y<sub>3</sub> y<sub>4</sub> y<sub>5</sub> y<sub>6</sub> y<sub>7</sub> y<sub>8</sub> y<sub>9</sub> y<sub>11</sub> y<sub>12</sub> y<sub>13</sub> y<sub>14</sub> y<sub>17</sub>



Raw file

20140918\_fract9\_dyn\_5ul\_E1\_01\_377

Scan

34107

Method

TOF; CID

Score

128.72

m/z

760.03

Gene names

CNIH4

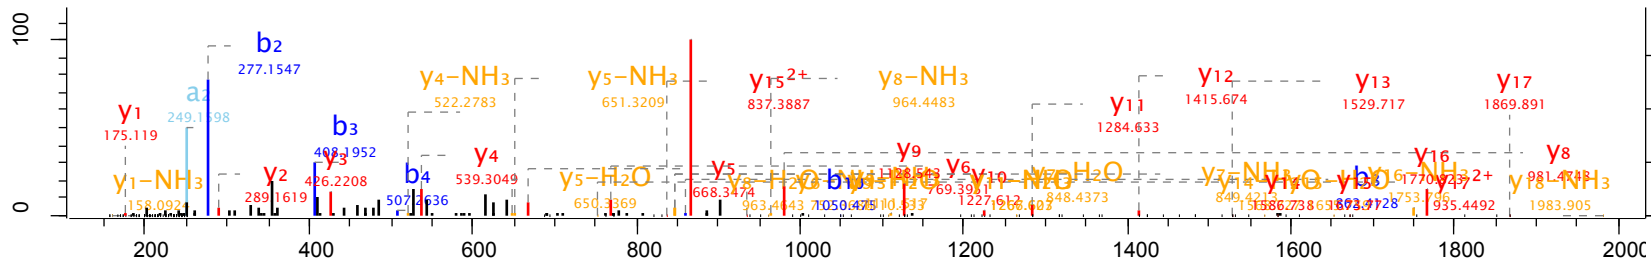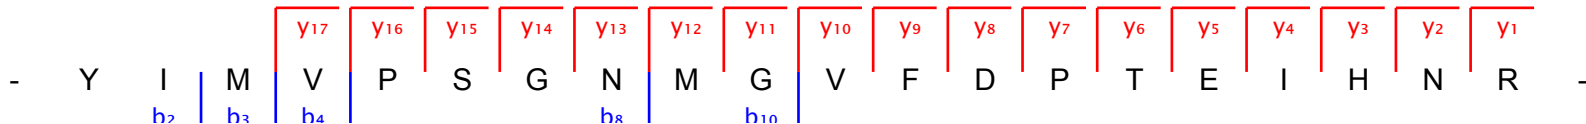

Raw file

20140918\_fract9\_dyn\_5ul\_E1\_01\_377

Scan

38027

Method

TOF; CID

Score

61.13

m/z

673.02

Gene names

PLAGL2

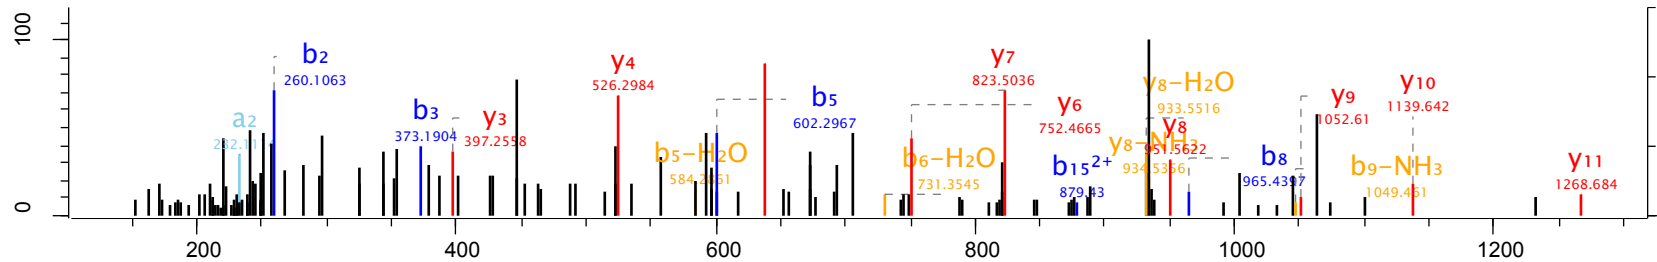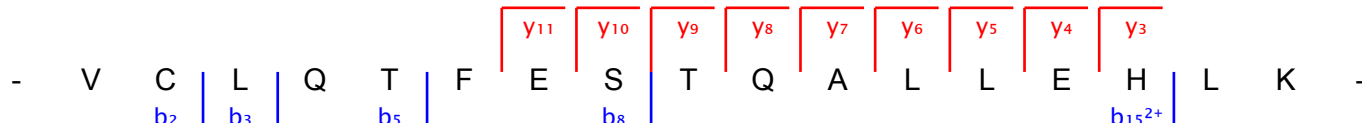

Raw file

20140918\_fract9\_dyn\_5ul\_E1\_01\_377

Scan

38516

Method

TOF; CID

Score

52.86

m/z

1017.54

Gene names

ZFAND2B

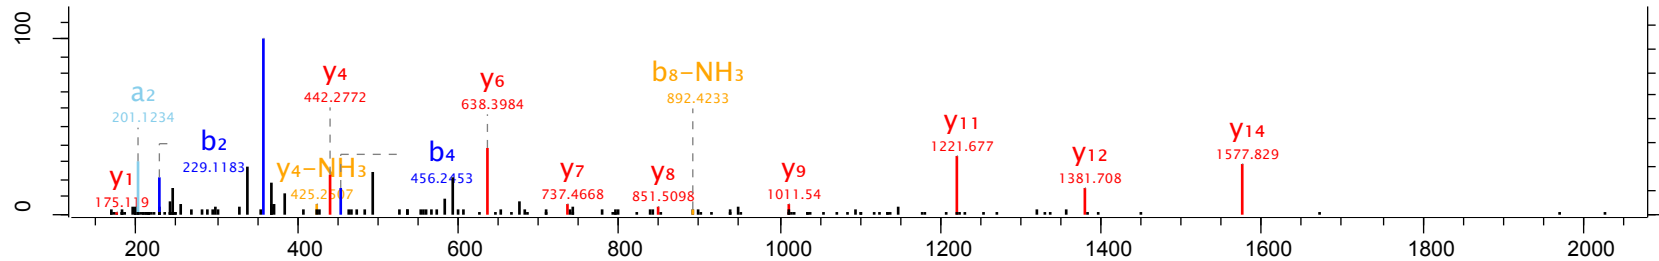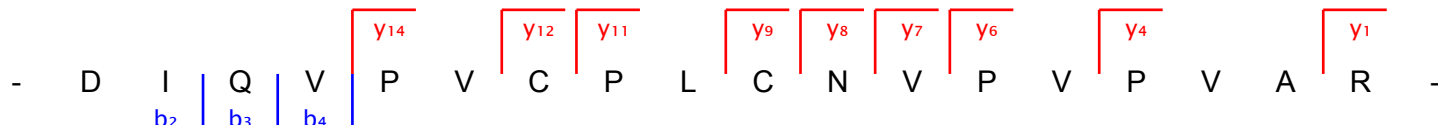

| Raw file                          | Scan  | Method   | Score | m/z     | Gene names |
|-----------------------------------|-------|----------|-------|---------|------------|
| 20140918_fract9_dyn_5ul_E1_01_377 | 38574 | TOF; CID | 75.55 | 1065.54 | KDEL1      |

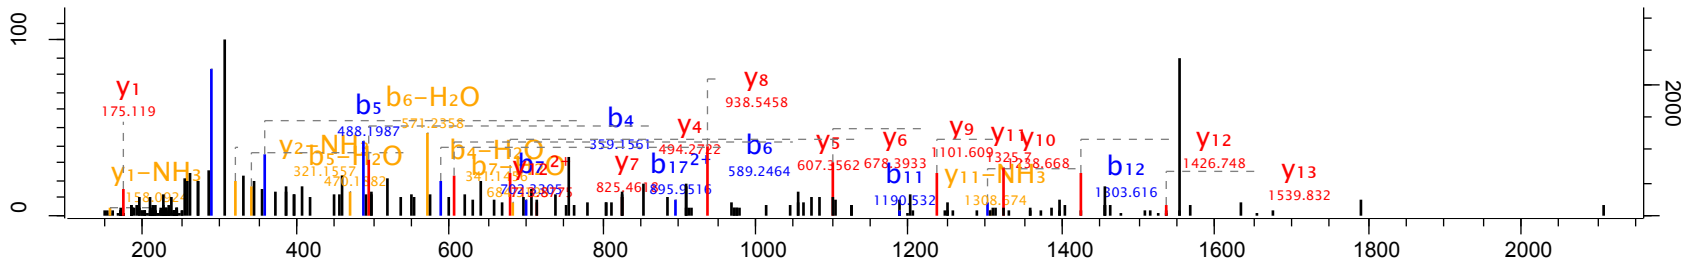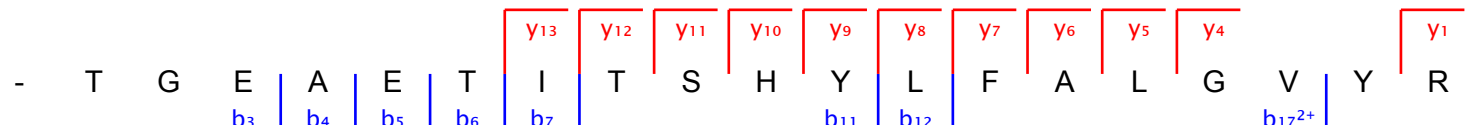

Raw file

20140918\_fract10\_dyn\_5ul\_E2\_01\_378

Scan

6158

Method

TOF; CID

Score

75.32

m/z

465.23

Gene names

CRAT

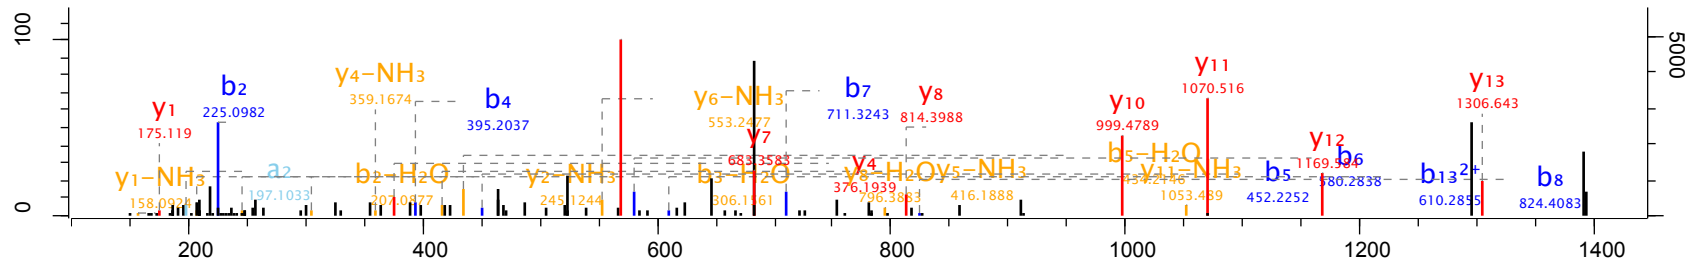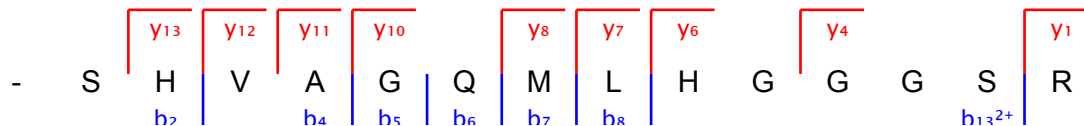

Raw file

20140918\_fract10\_dyn\_5ul\_E2\_01\_378

Scan

6940

Method

TOF; CID

Score

49.77

m/z

581.28

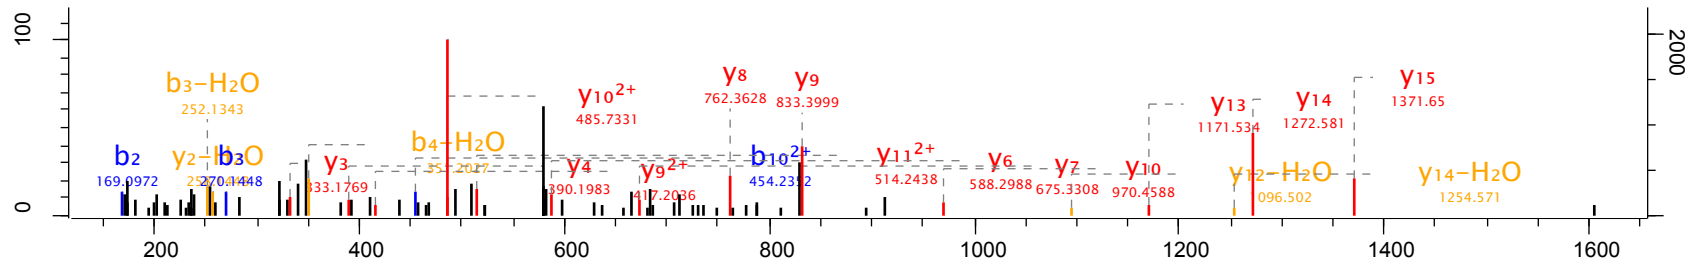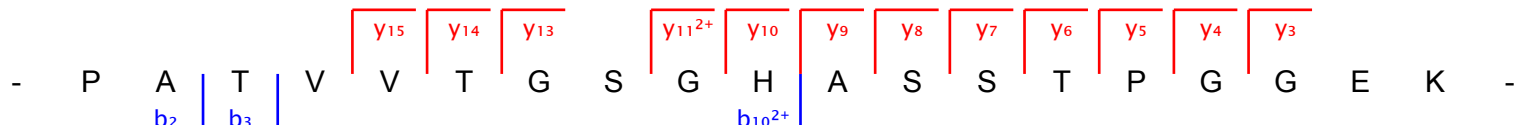

Raw file

Scan

Method

Score

m/z

Gene names

20140918\_fract10\_dyn\_5ul\_E2\_01\_378

7502

TOF; CID

102.97

446.23

NINJ1

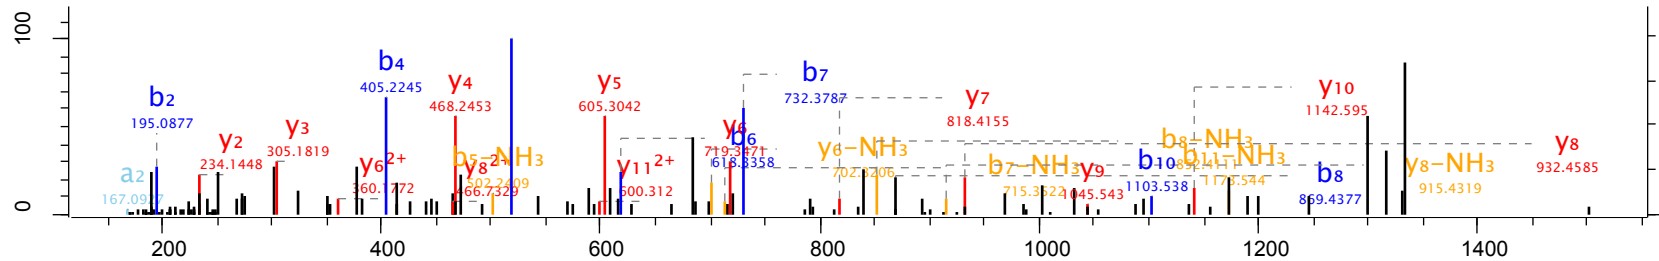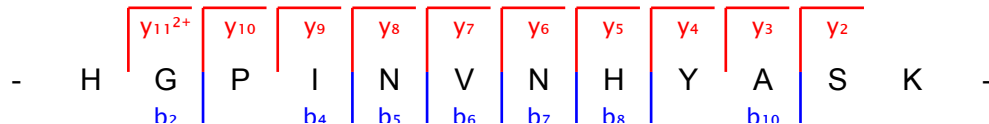

Raw file

Scan

Method

Score

m/z

Gene names

20140918\_fract10\_dyn\_5ul\_E2\_01\_378

7973

TOF; CID

94.12

505.25

ZNF566;TMEM92

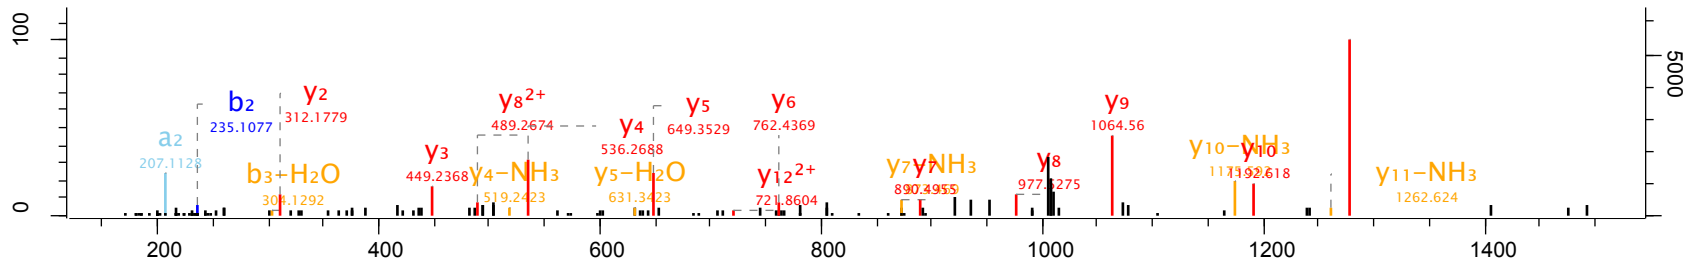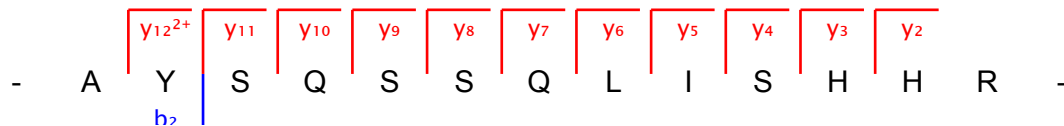



Raw file

20140918\_fract10\_dyn\_5ul\_E2\_01\_378

Scan

10331

Method

TOF; CID

Score

87.57

m/z

353.44

Gene names

C15orf41

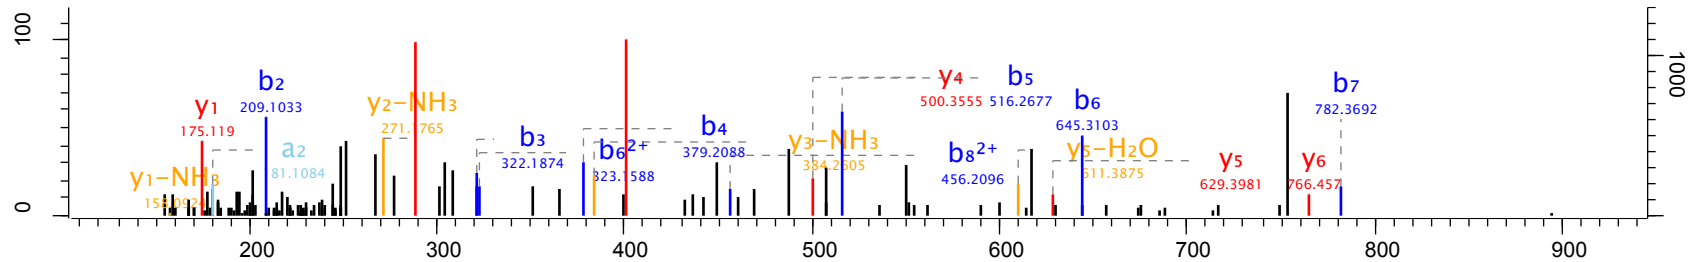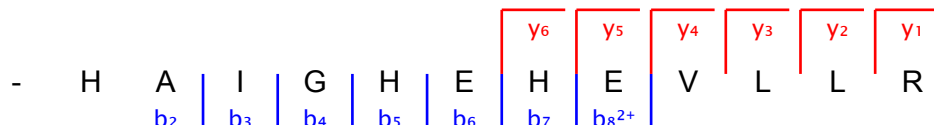

| Raw file                           | Scan  | Method   | Score  | m/z    | Gene names |
|------------------------------------|-------|----------|--------|--------|------------|
| 20140918_fract10_dyn_5ul_E2_01_378 | 10459 | TOF; CID | 125.74 | 545.32 | PRICKLE2   |

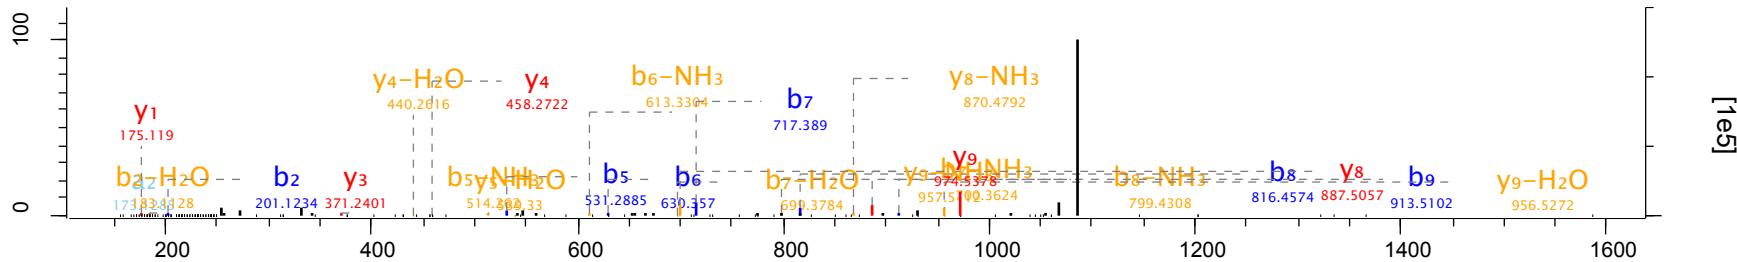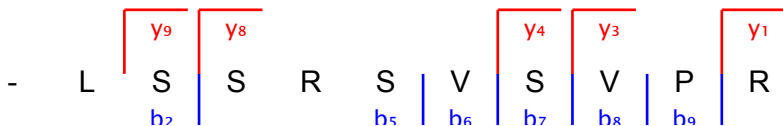

| Raw file                           | Scan  | Method   | Score | m/z    | Gene names |
|------------------------------------|-------|----------|-------|--------|------------|
| 20140918_fract10_dyn_5ul_E2_01_378 | 13201 | TOF; CID | 78.82 | 529.32 | RPGRIP1    |

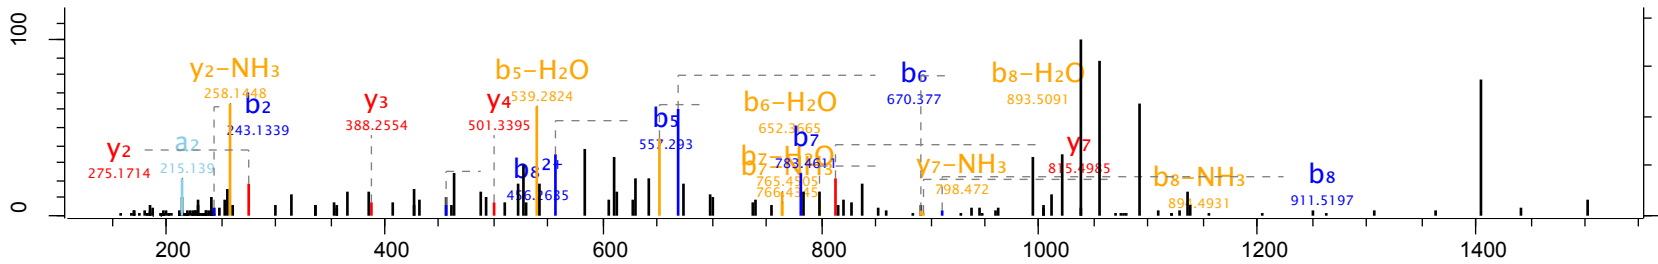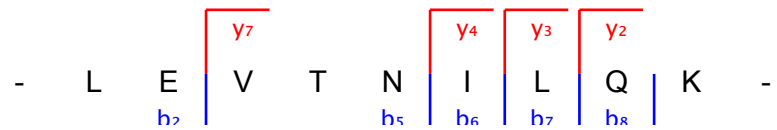

Raw file

20140918\_fract10\_dyn\_5ul\_E2\_01\_378

Scan

17242

Method

TOF; CID

Score

57.17

m/z

432.23

Gene names

NDUFC1

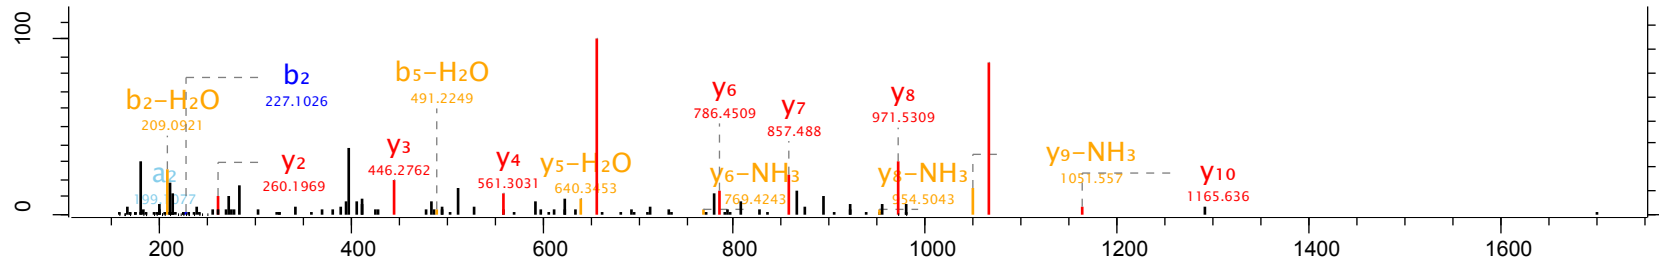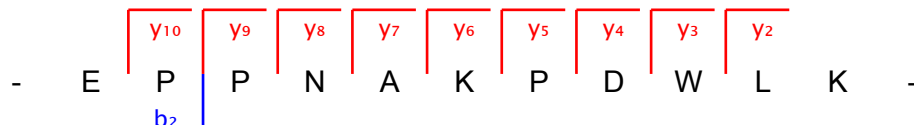

| Raw file                           | Scan  | Method   | Score | m/z    | Gene names |
|------------------------------------|-------|----------|-------|--------|------------|
| 20140918_fract10_dyn_5ul_E2_01_378 | 17727 | TOF; CID | 47.55 | 628.31 | METAP1D    |

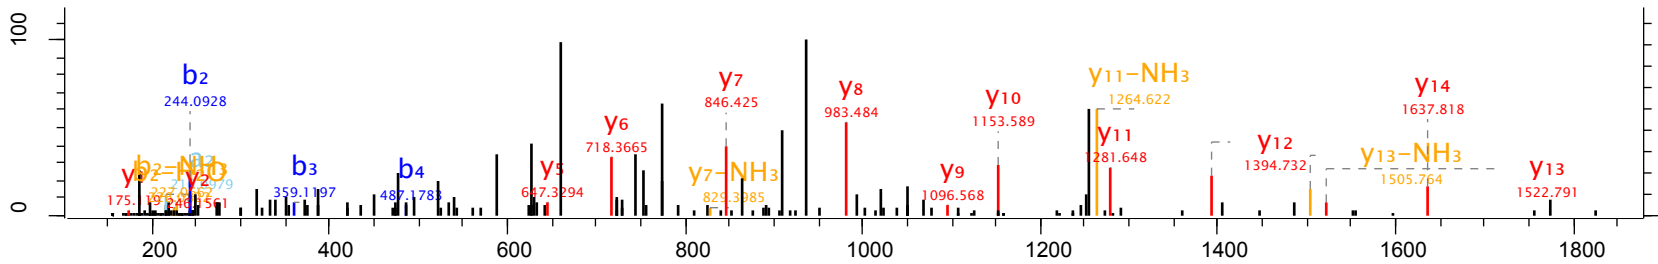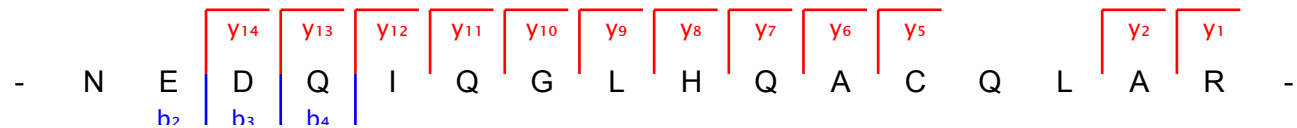

| Raw file                           | Scan  | Method   | Score | m/z    | Gene names |
|------------------------------------|-------|----------|-------|--------|------------|
| 20140918_fract10_dyn_5ul_E2_01_378 | 20538 | TOF; CID | 66.27 | 421.23 | GNG11      |

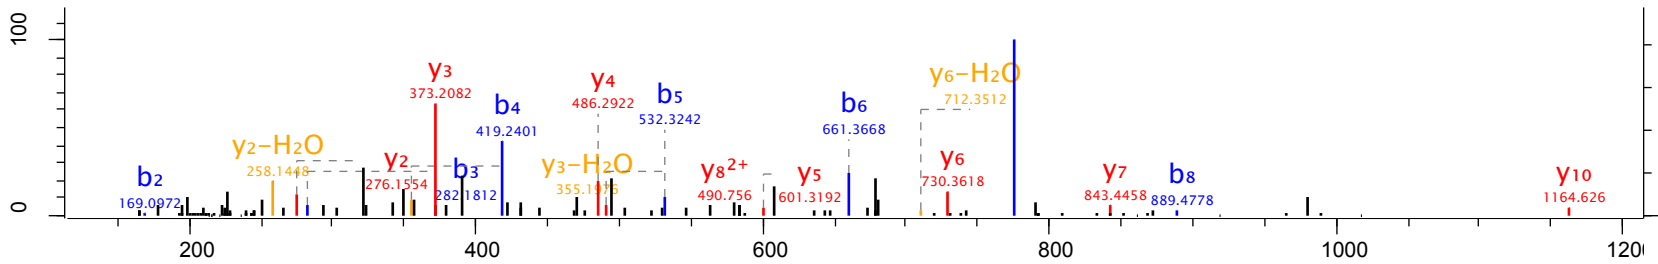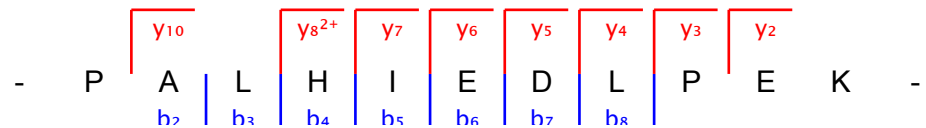

Raw file

20140918\_fract10\_dyn\_5ul\_E2\_01\_378

Scan

26597

Method

TOF; CID

Score

119.57

m/z

414.27

Gene names

C2orf72

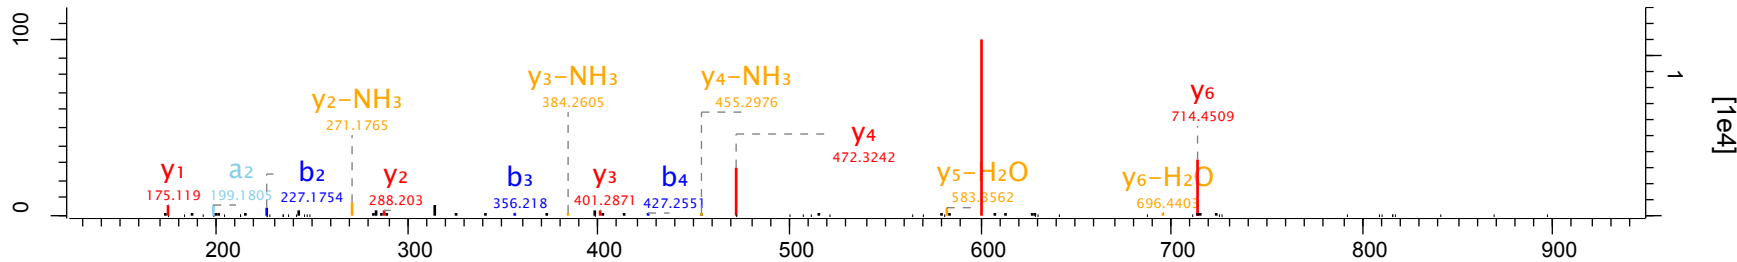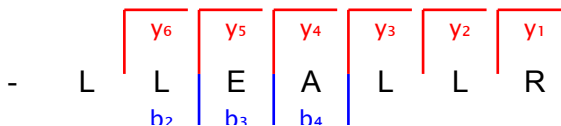

Raw file

20140918\_fract10\_dyn\_5ul\_E2\_01\_378

Scan

26649

Method

TOF; CID

Score

43.33

m/z

979.49

Gene names

OSBPL8

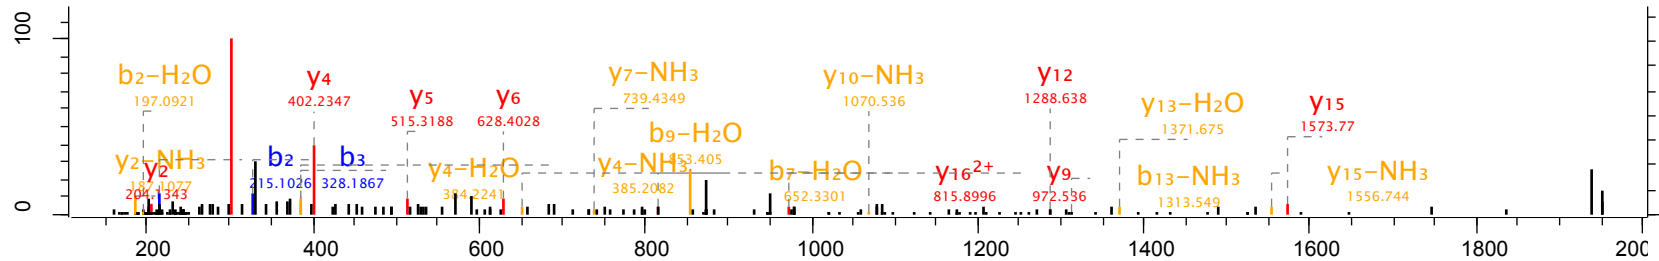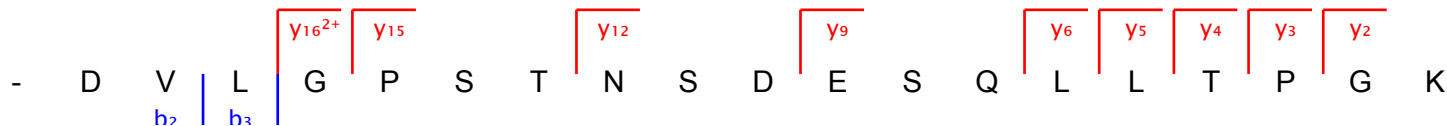



Raw file

20140918\_fract10\_dyn\_5ul\_E2\_01\_378

Scan

30767

Method

TOF; CID

Score

120.9

m/z

865.99

Gene names

KRTCAP2

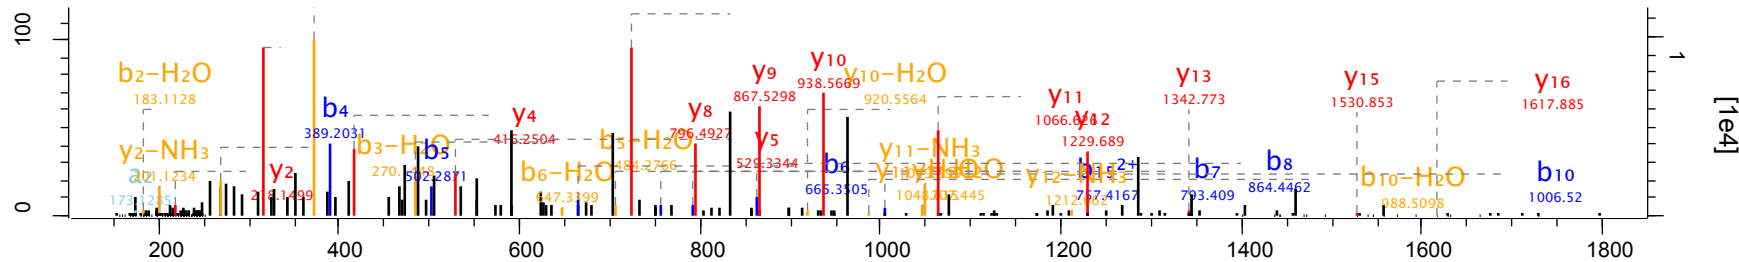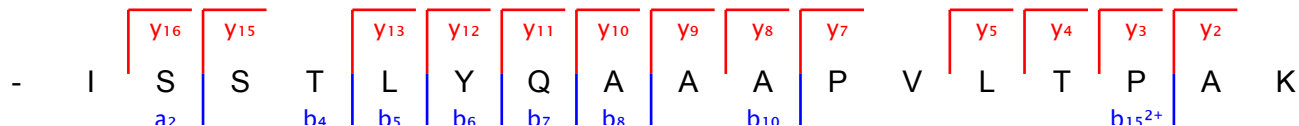

Raw file

20140918\_fract10\_dyn\_5ul\_E2\_01\_378

Scan

33088

Method

TOF; CID

Score

216

m/z

928.44

Gene names

MAPK1IP1L

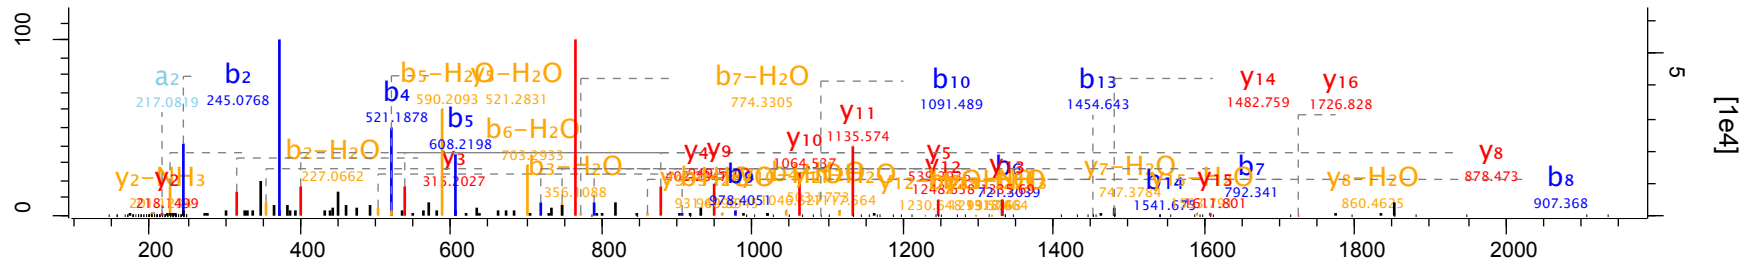

ac

S D E F S L A D A L P E H S P A K -

b<sub>2</sub> b<sub>3</sub> b<sub>4</sub> b<sub>5</sub> b<sub>6</sub> b<sub>7</sub> b<sub>8</sub> b<sub>9</sub> b<sub>10</sub> b<sub>13</sub> b<sub>14</sub> b<sub>15</sub> b<sub>16</sub>

y<sub>2</sub> y<sub>3</sub> y<sub>4</sub> y<sub>5</sub> y<sub>7</sub> y<sub>8</sub> y<sub>9</sub> y<sub>10</sub> y<sub>11</sub> y<sub>12</sub> y<sub>13</sub> y<sub>14</sub> y<sub>15</sub> y<sub>16</sub>

Raw file

20140918\_fract10\_dyn\_5ul\_E2\_01\_378

Scan

34653

Method

TOF; CID

Score

137.89

m/z

814.92

Gene names

CCDC167

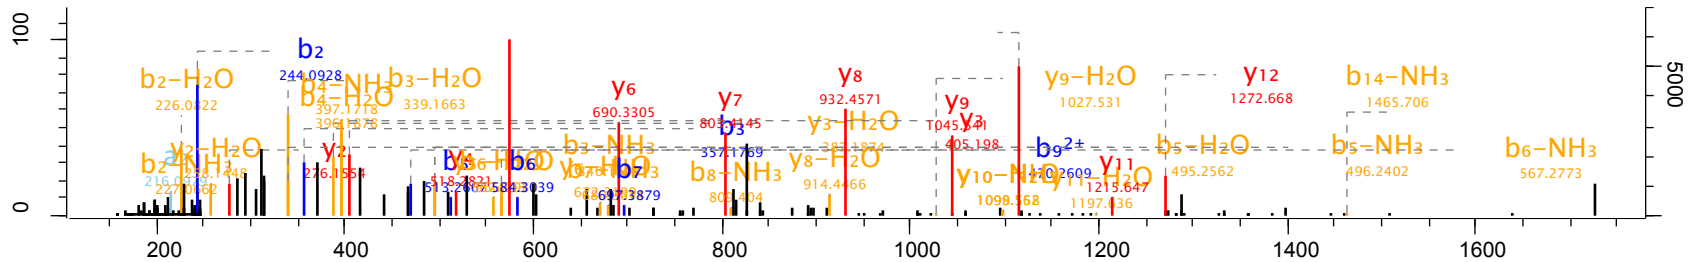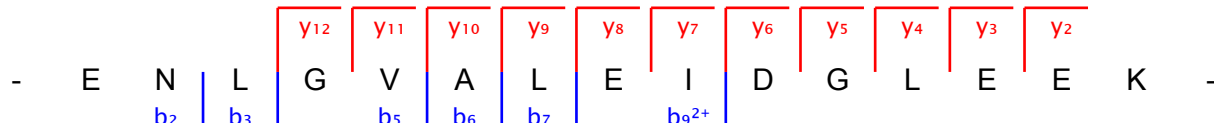

Raw file

20140918\_fract11\_dyn\_5ul\_E3\_01\_379

Scan

6911

Method

TOF; CID

Score

113.24

m/z

544.91

Gene names

ZNF302

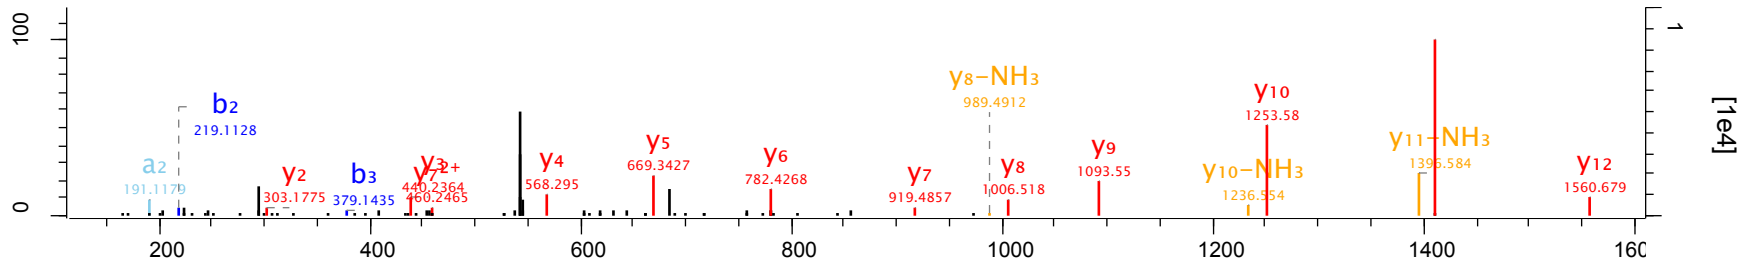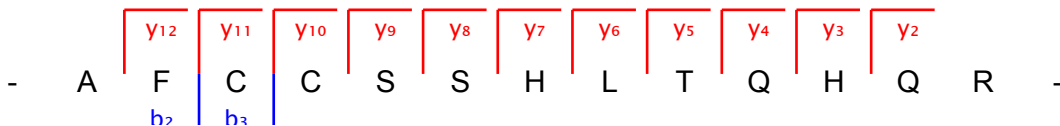

Raw file

20140918\_fract11\_dyn\_5ul\_E3\_01\_379

Scan

7039

Method

TOF; CID

Score

80.39

m/z

526.62

Gene names

ZNF251

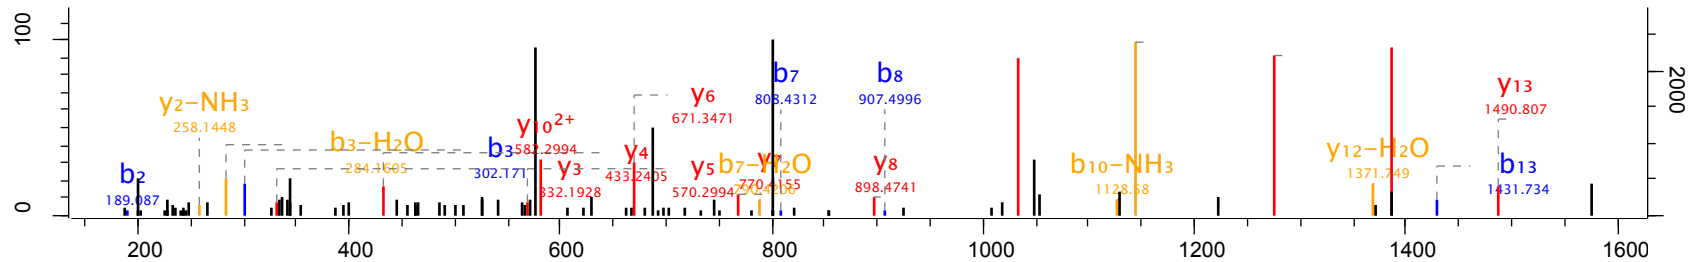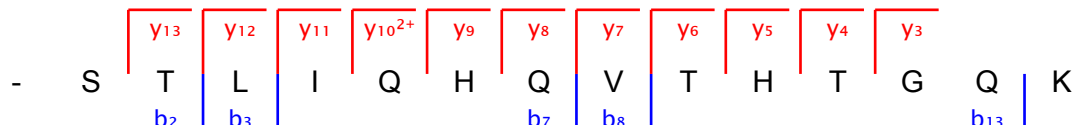

| Raw file                           | Scan | Method   | Score  | m/z    | Gene names |
|------------------------------------|------|----------|--------|--------|------------|
| 20140918_fract11_dyn_5ul_E3_01_379 | 9261 | TOF; CID | 106.38 | 465.24 | TMEM41A    |

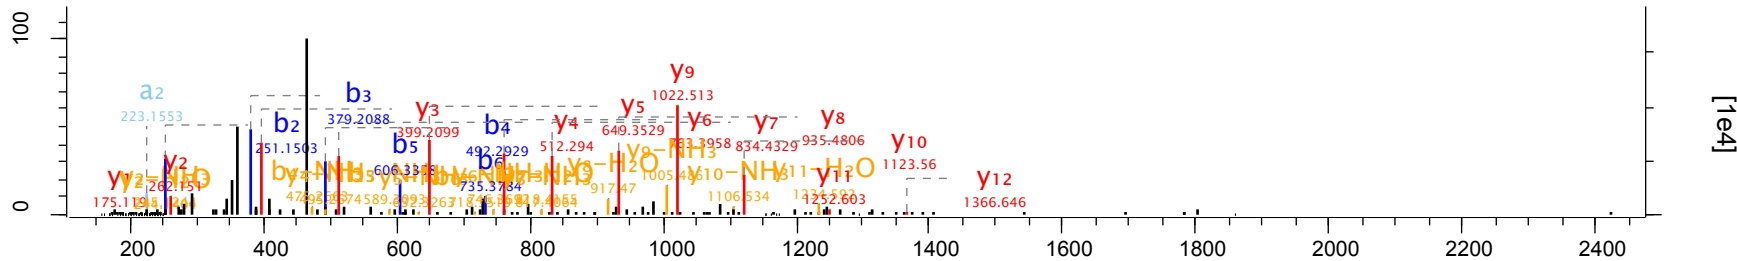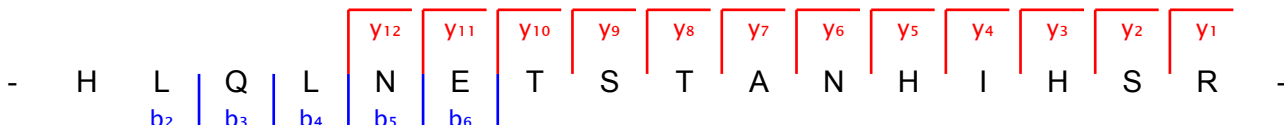

Raw file

Scan

Method

Score

m/z

Gene names

20140918\_fract11\_dyn\_5ul\_E3\_01\_379

9894

TOF; CID

74.53

368.21

SPATA24

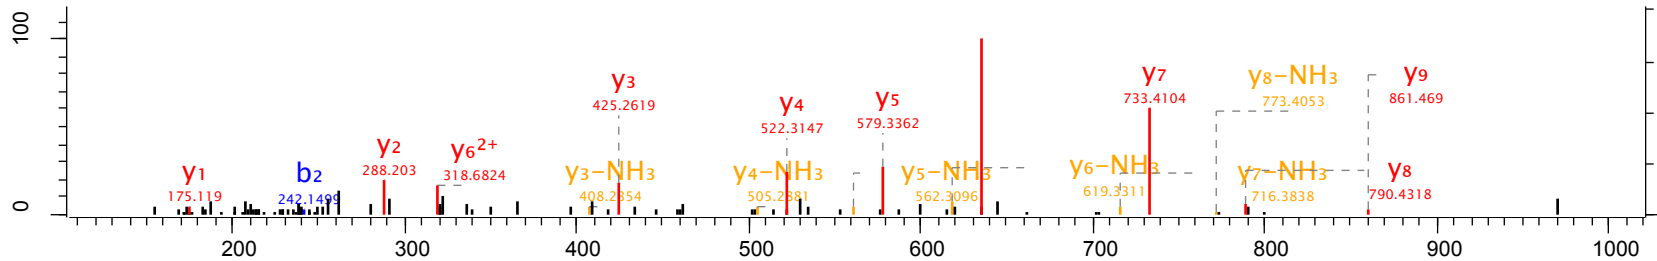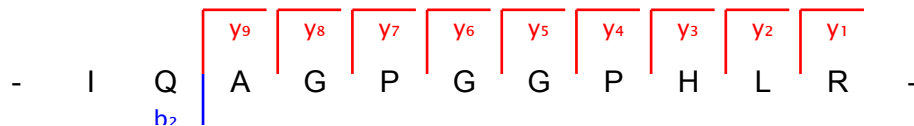

Raw file

20140918\_fract11\_dyn\_5ul\_E3\_01\_379

Scan

16771

Method

TOF; CID

Score

133.05

m/z

617.83

Gene names

SUMO2;SUMO3;SUMO4

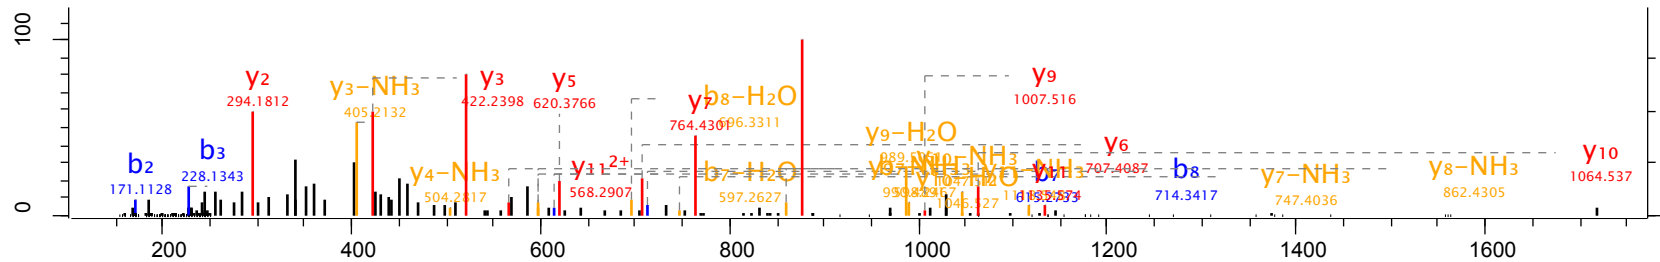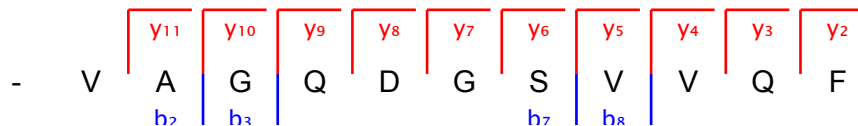



Raw file

20140918\_fract11\_dyn\_5ul\_E3\_01\_379

Scan

16787

Method

TOF; CID

Score

38.38

m/z

700.35

Gene names

MIDN

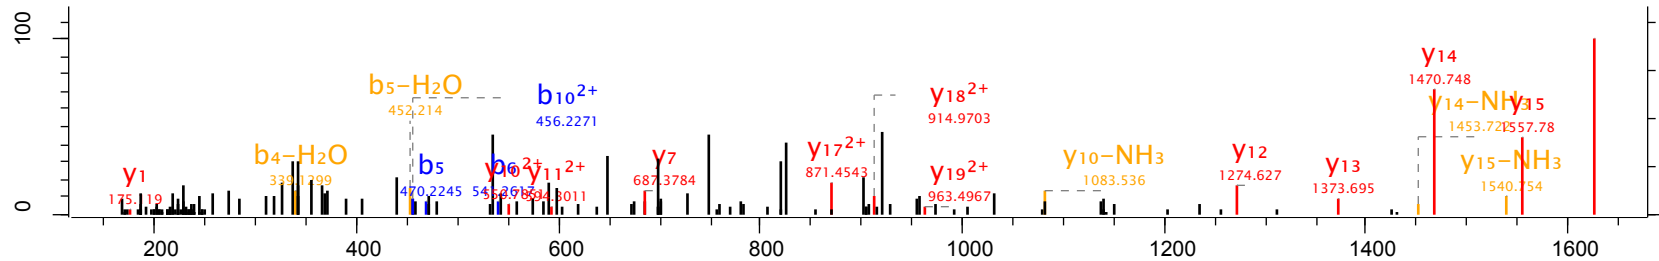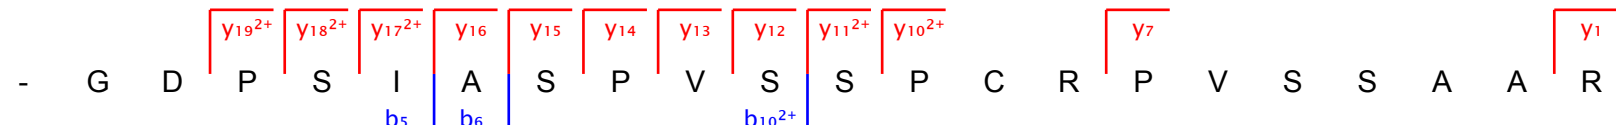

Raw file

20140918\_fract11\_dyn\_5ul\_E3\_01\_379

Scan

20114

Method

TOF; CID

Score

74.85

m/z

581.6

Gene names

RCHY1

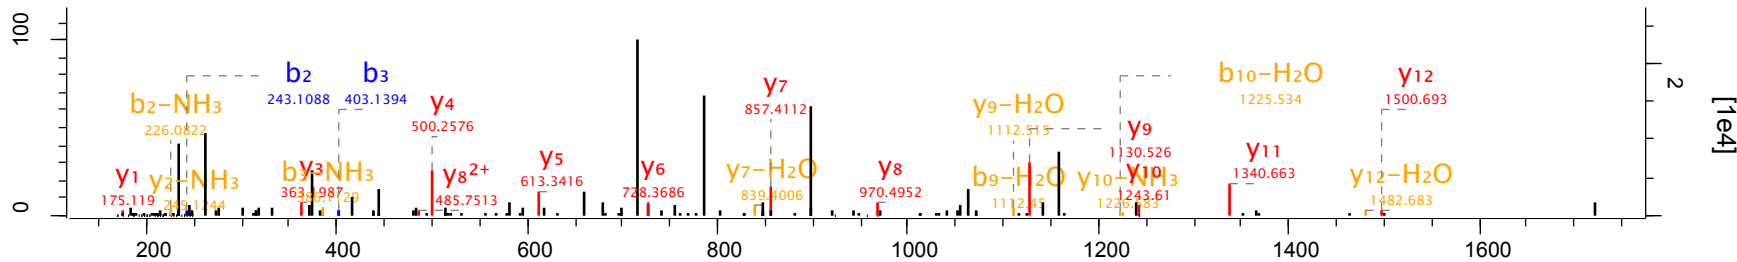

- Q N C P I C L E D I H T S R -

b<sub>2</sub> b<sub>3</sub>

y<sub>12</sub> y<sub>11</sub> y<sub>10</sub> y<sub>9</sub> y<sub>8</sub> y<sub>7</sub> y<sub>6</sub> y<sub>5</sub> y<sub>4</sub> y<sub>3</sub> y<sub>1</sub>

| Raw file                           | Scan  | Method   | Score | m/z    | Gene names |
|------------------------------------|-------|----------|-------|--------|------------|
| 20140918_fract11_dyn_5ul_E3_01_379 | 20243 | TOF; CID | 61.41 | 513.28 | MYEOV2     |

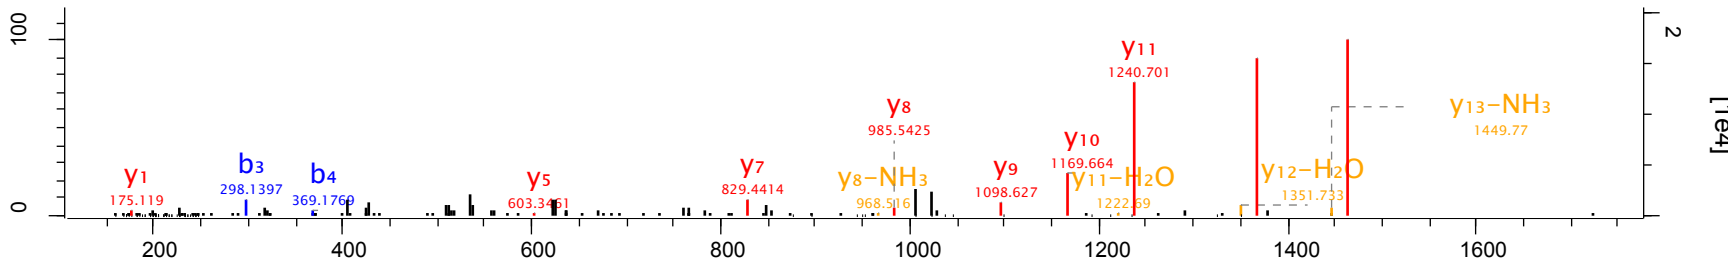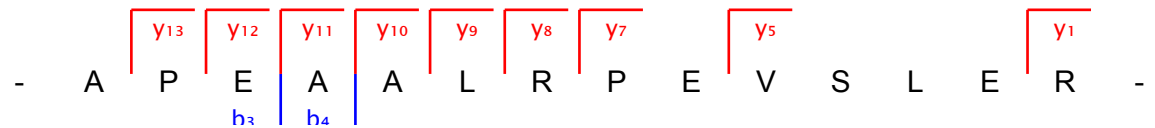

Raw file

20140918\_fract11\_dyn\_5ul\_E3\_01\_379

Scan

21398

Method

TOF; CID

Score

132.25

m/z

608.33

Gene names

SVIP

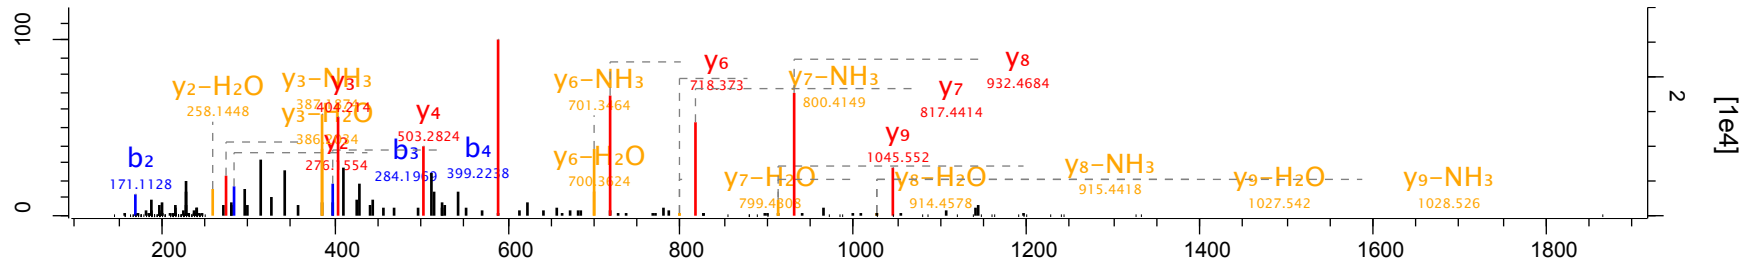

- G I L D V Q S V Q E K -

b<sub>2</sub> b<sub>3</sub> b<sub>4</sub>

y<sub>9</sub> y<sub>8</sub> y<sub>7</sub> y<sub>6</sub> y<sub>5</sub> y<sub>4</sub> y<sub>3</sub> y<sub>2</sub>

Raw file  
 20140918\_fract11\_dyn\_5ul\_E3\_01\_379

| Scan  | Method   | Score | m/z    | Gene names |
|-------|----------|-------|--------|------------|
| 24909 | TOF; CID | 83.82 | 857.86 | MT-ND3     |

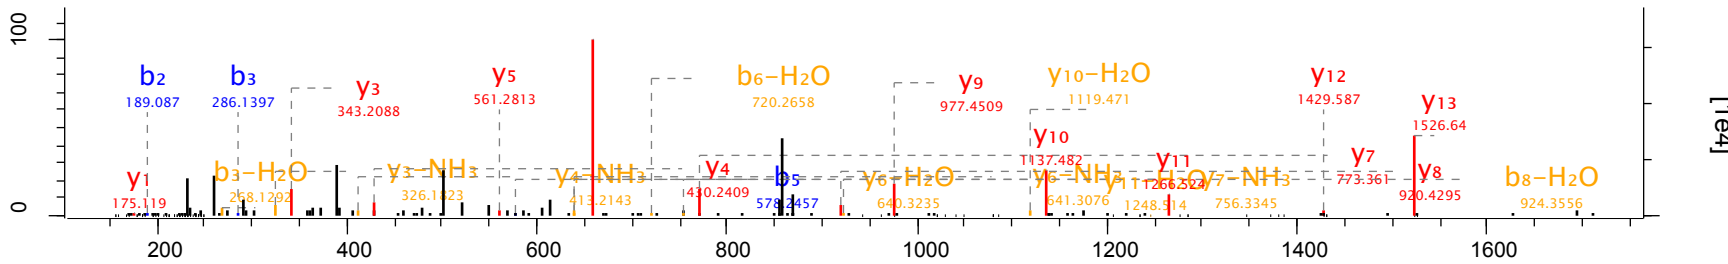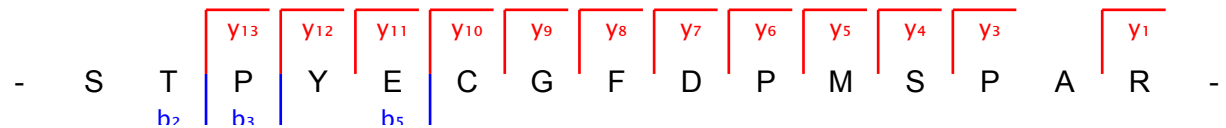

Raw file

20140918\_fract11\_dyn\_5ul\_E3\_01\_379

Scan

25227

Method

TOF; CID

Score

125.45

m/z

914.41

Gene names

RNF5

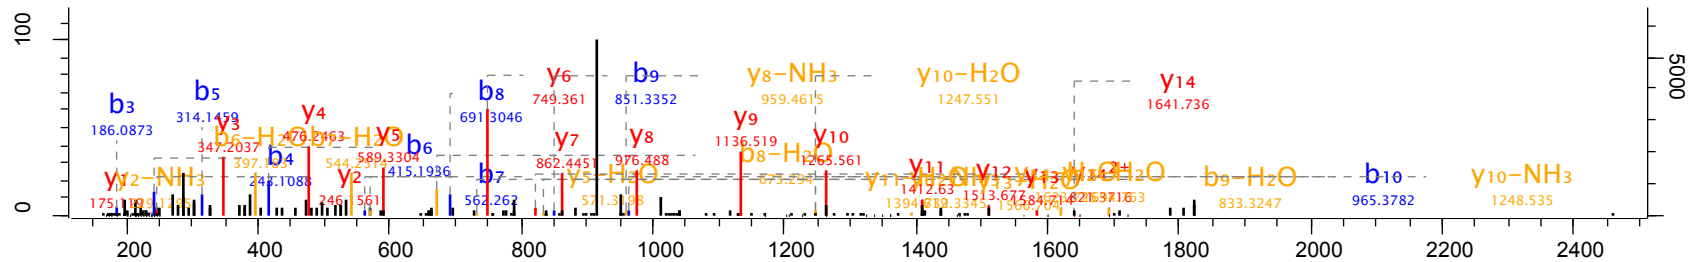

- G G A G A T F E C N I C L E T A R -

b<sub>3</sub> y<sub>14</sub> y<sub>13</sub> y<sub>12</sub> y<sub>11</sub> y<sub>10</sub> y<sub>9</sub> y<sub>8</sub> y<sub>7</sub> y<sub>6</sub> y<sub>5</sub> y<sub>4</sub> y<sub>3</sub> y<sub>2</sub> y<sub>1</sub>  
b<sub>4</sub> b<sub>5</sub> b<sub>6</sub> b<sub>7</sub> b<sub>8</sub> b<sub>9</sub> b<sub>10</sub>

Raw file

Scan

Method

Score

m/z

Gene names

20140918\_fract11\_dyn\_5ul\_E3\_01\_379

25906

TOF; CID

85.47

664.98

DCUN1D2

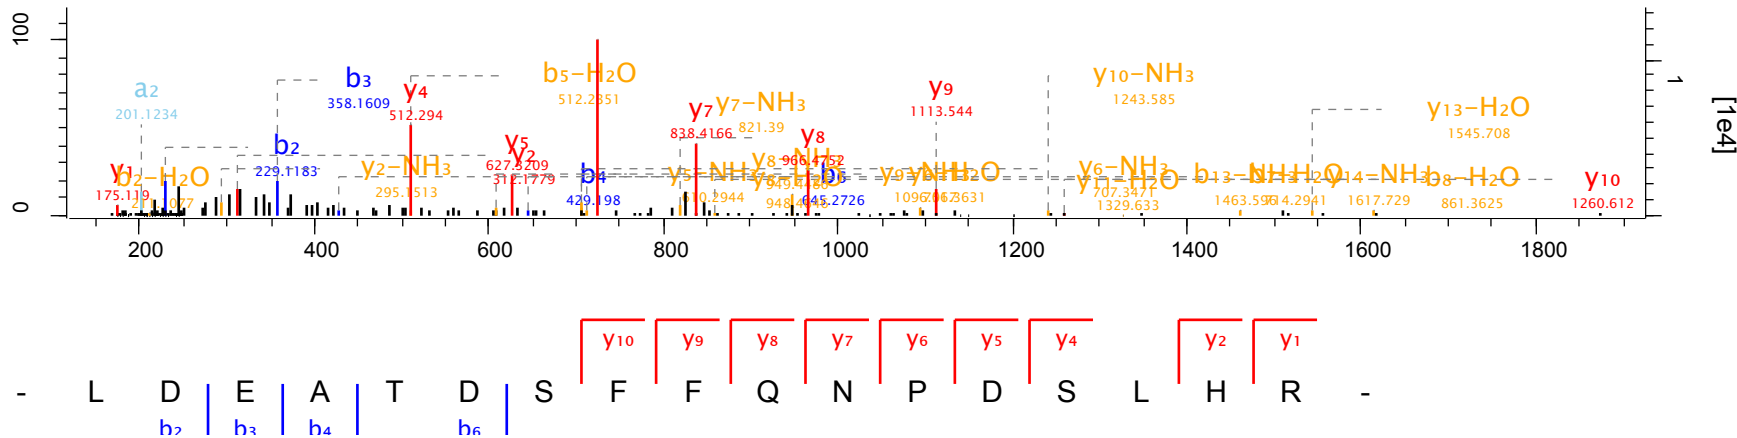

| Raw file                           | Scan  | Method   | Score  | m/z    | Gene names |
|------------------------------------|-------|----------|--------|--------|------------|
| 20140918_fract11_dyn_5ul_E3_01_379 | 26489 | TOF; CID | 121.52 | 497.28 | MT-ND1     |

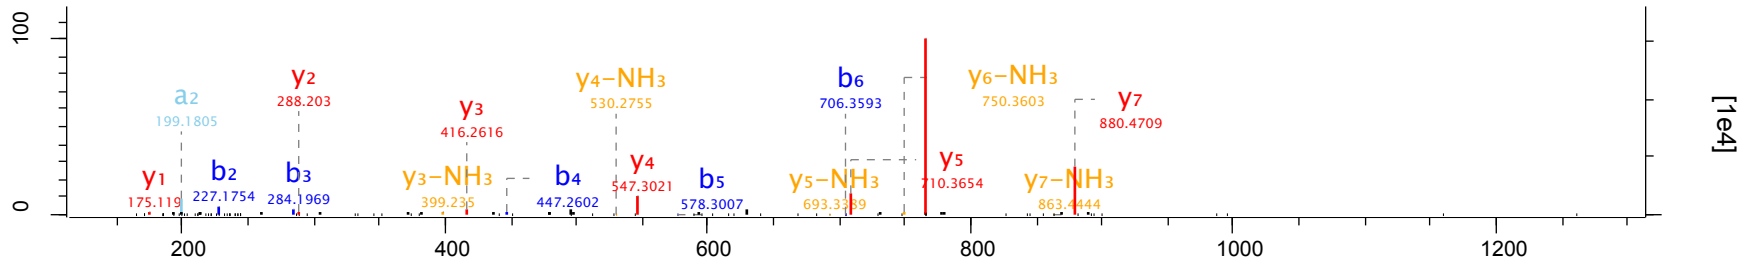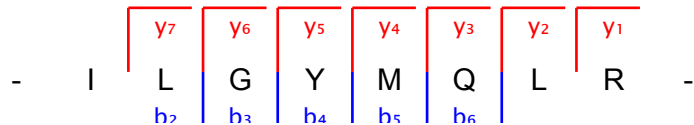



Raw file

20140918\_fract11\_dyn\_5ul\_E3\_01\_379

Scan

27824

Method

TOF; CID

Score

75.74

m/z

363.88

Gene names

UVSSA

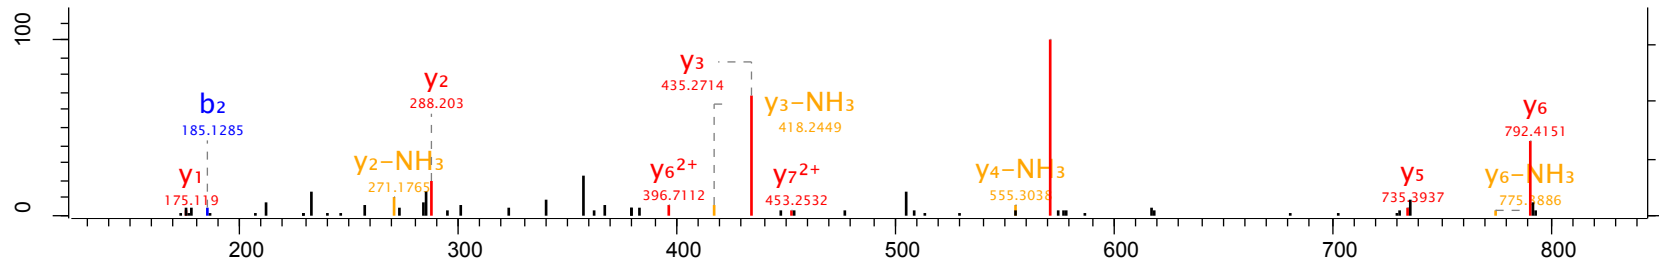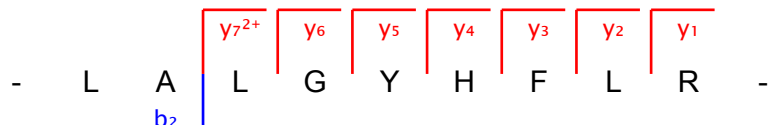

Raw file

20140918\_fract11\_dyn\_5ul\_E3\_01\_379

Scan

28758

Method

TOF; CID

Score

119.87

m/z

734.84

Gene names

AGPAT2

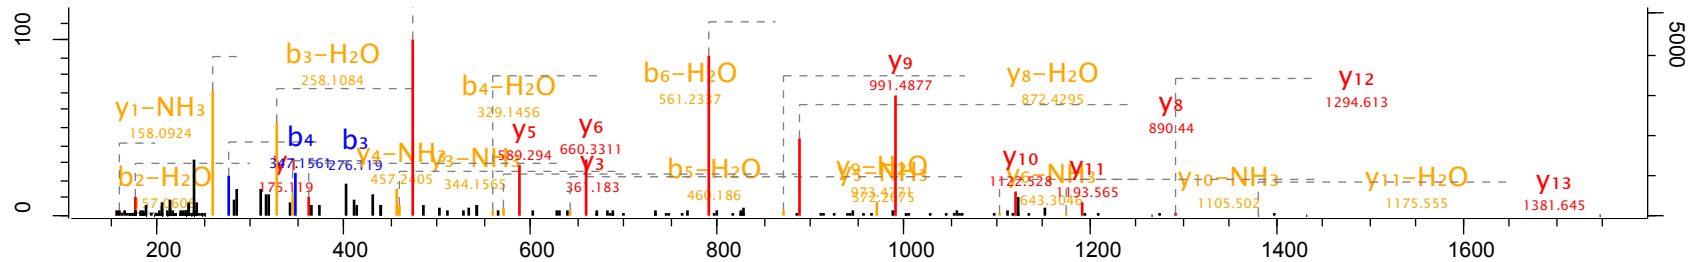

- S S T A M T V M A D L G E R -

y13 y12 y11 y10 y9 y8 y7 y6 y5 y4 y3 y1  
b3 b4

| Raw file                           | Scan  | Method   | Score  | m/z    | Gene names |
|------------------------------------|-------|----------|--------|--------|------------|
| 20140918_fract11_dyn_5ul_E3_01_379 | 29796 | TOF; CID | 120.46 | 452.77 | MYLK       |

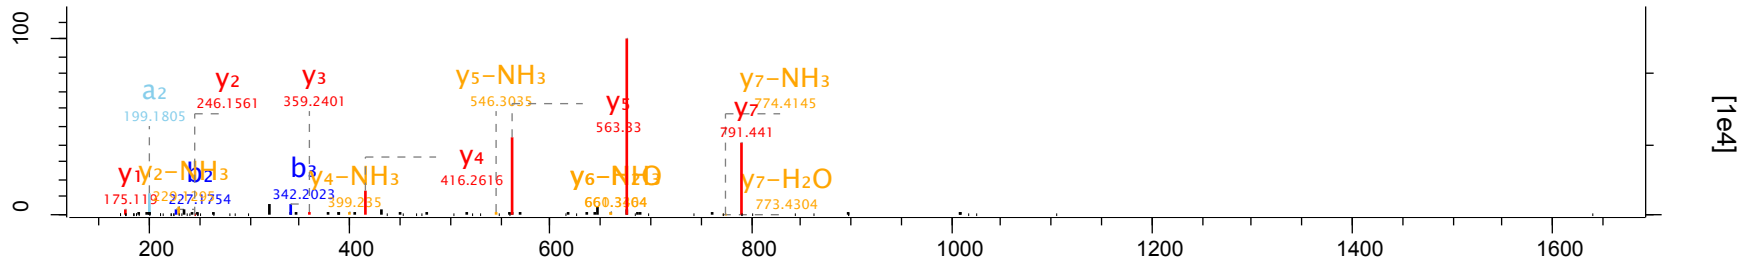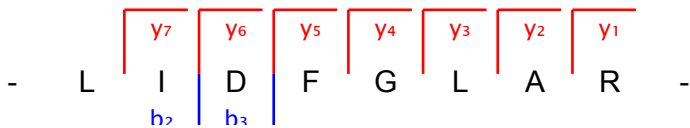

Raw file

20140918\_fract11\_dyn\_5ul\_E3\_01\_379

Scan

32811

Method

TOF; CID

Score

69.72

m/z

493.28

Gene names

TOR1AIP2

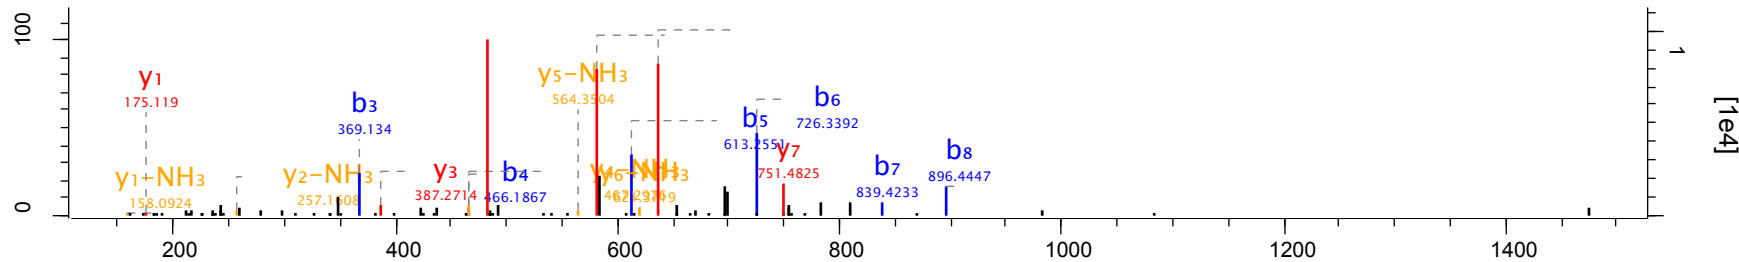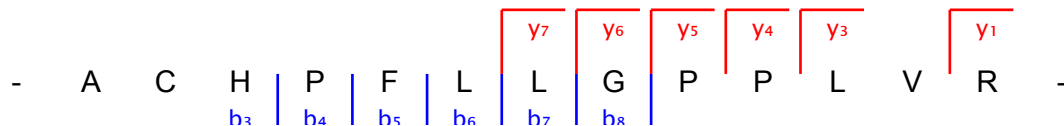

Raw file

20140918\_fract11\_dyn\_5ul\_E3\_01\_379

Scan

33243

Method

TOF; CID

Score

120.77

m/z

441.6

Gene names

SNX24

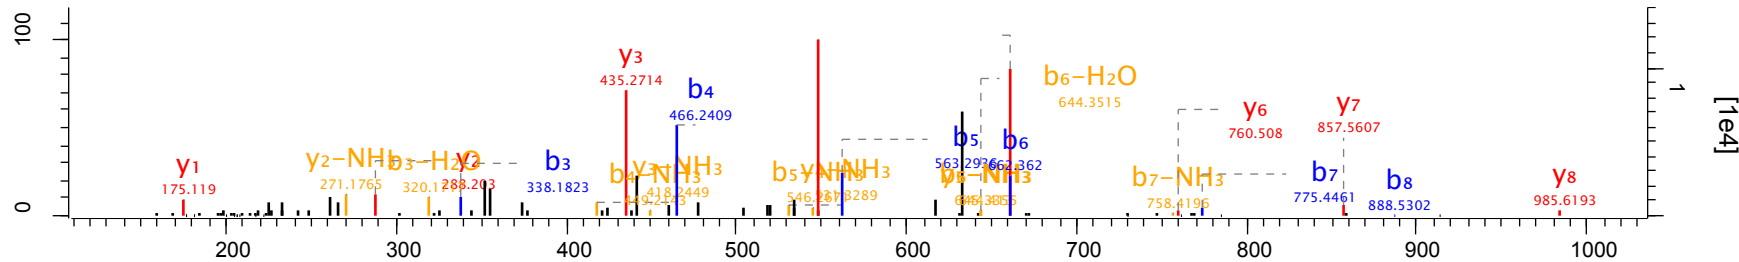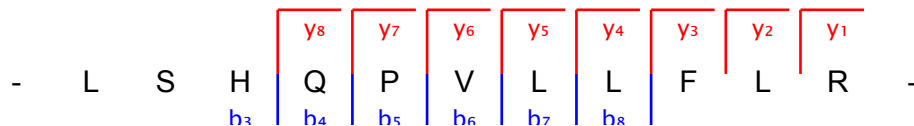

Raw file

20140918\_fract11\_dyn\_5ul\_E3\_01\_379

Scan

34360

Method

TOF; CID

Score

132.32

m/z

629.84

Gene names

GTF2A1;HIST1H4F

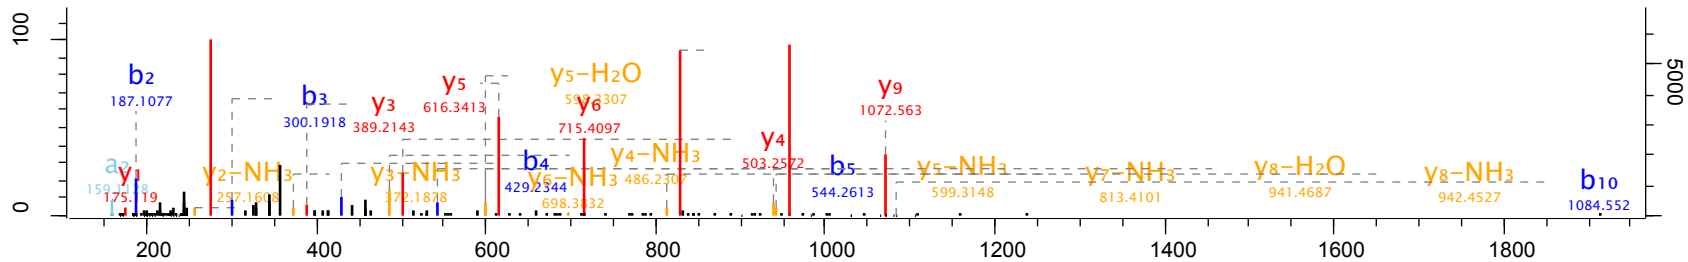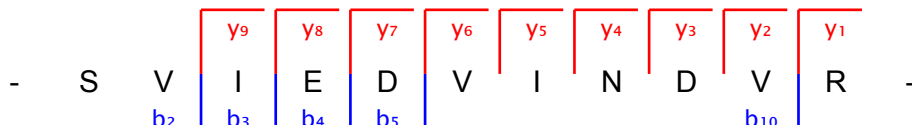

| Raw file                           | Scan  | Method   | Score | m/z    | Gene names |
|------------------------------------|-------|----------|-------|--------|------------|
| 20140918_fract11_dyn_5ul_E3_01_379 | 34473 | TOF; CID | 66.06 | 574.82 | AGBL2      |

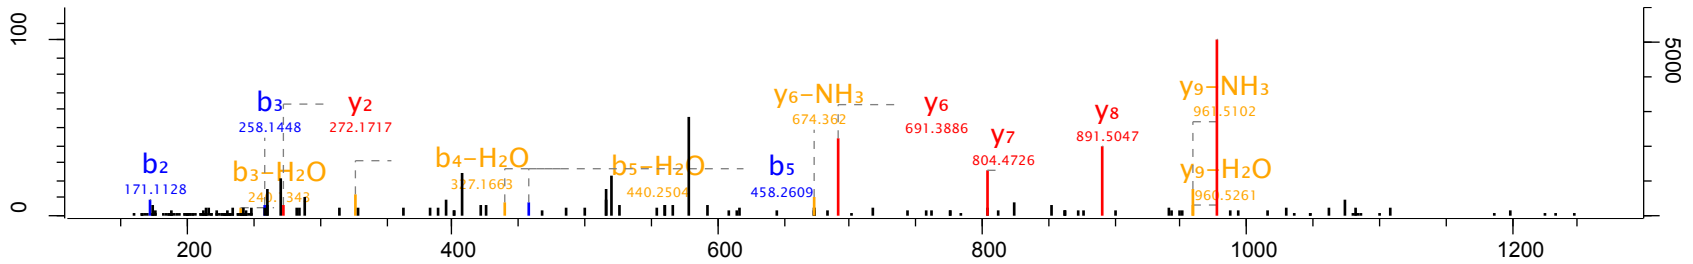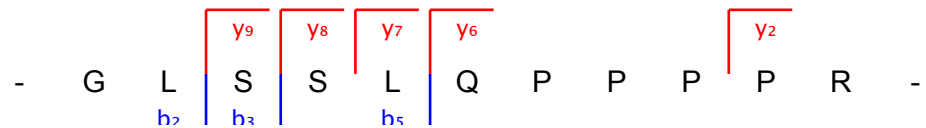

| Raw file                           | Scan  | Method   | Score  | m/z    | Gene names |
|------------------------------------|-------|----------|--------|--------|------------|
| 20140918_fract11_dyn_5ul_E3_01_379 | 36638 | TOF; CID | 139.88 | 560.32 | KDEL3      |

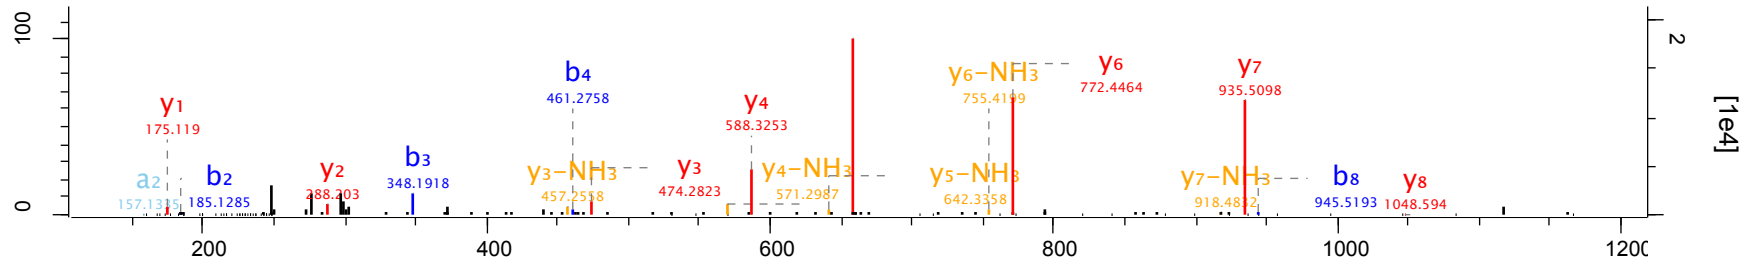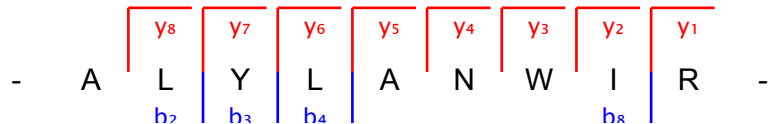



Raw file

20140918\_fract11\_dyn\_5ul\_E3\_01\_379

Scan

37635

Method

TOF; CID

Score

105.72

m/z

1351.63

Gene names

SMAGP

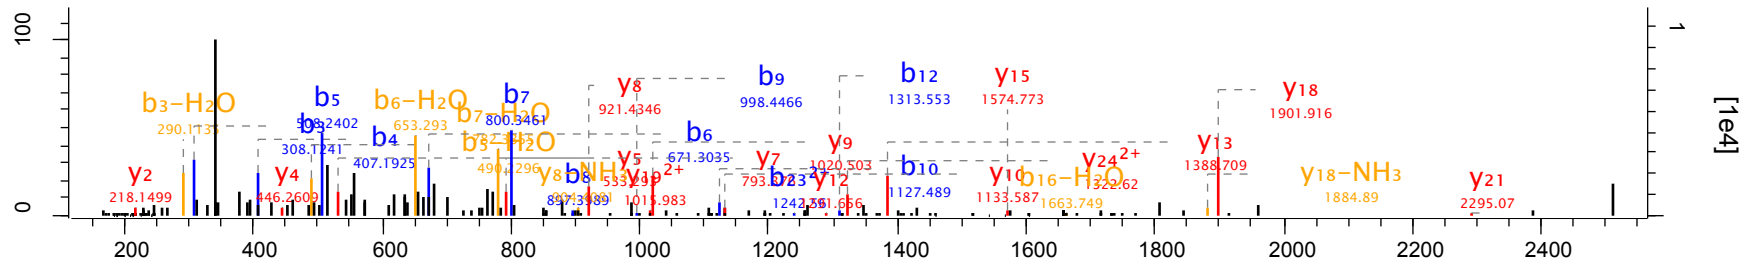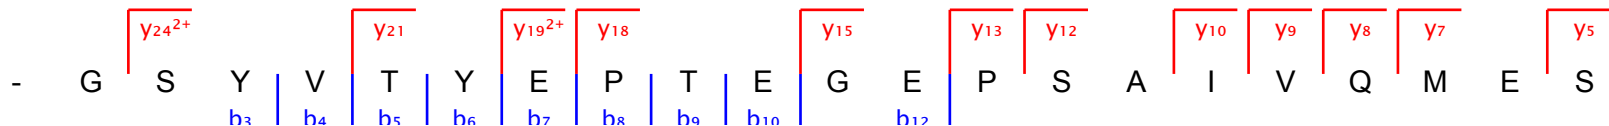

| Raw file                           | Scan  | Method   | Score  | m/z   | Gene names |
|------------------------------------|-------|----------|--------|-------|------------|
| 20140918_fract11_dyn_5ul_E3_01_379 | 38389 | TOF; CID | 128.03 | 610.3 | CMTM6      |

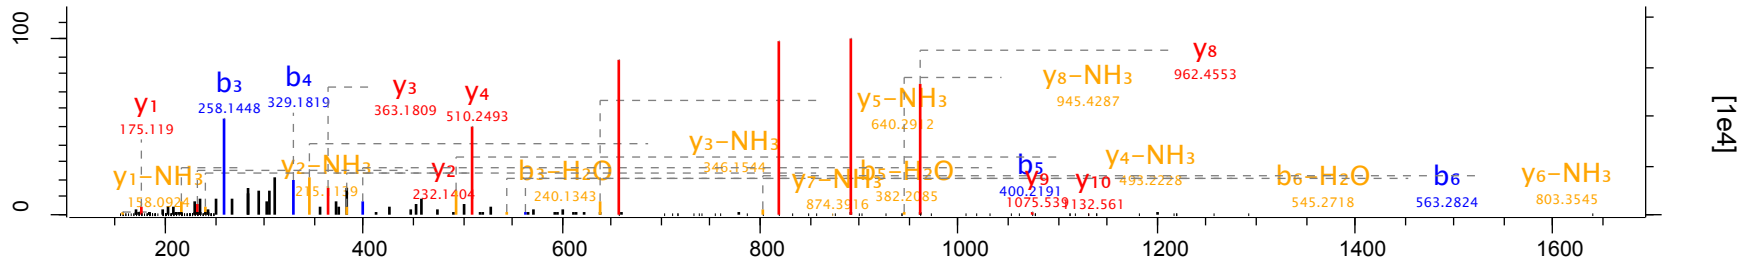

- S G L A A Y F F M G R -  
       |  |  |  |  |  |  |  |  |  |  
       b<sub>3</sub> b<sub>4</sub> b<sub>5</sub> b<sub>6</sub>  
       y<sub>10</sub> y<sub>9</sub> y<sub>8</sub> y<sub>7</sub> y<sub>6</sub> y<sub>5</sub> y<sub>4</sub> y<sub>3</sub> y<sub>2</sub> y<sub>1</sub>

Raw file

20140918\_fract12\_dyn\_5ul\_E4\_01\_380

Scan

6672

Method

TOF; CID

Score

87.64

m/z

499.22

Gene names

ZNF580

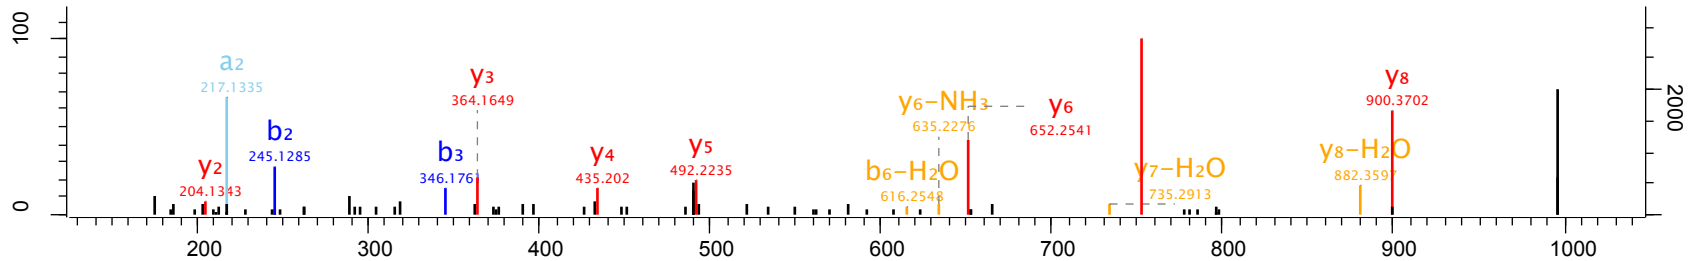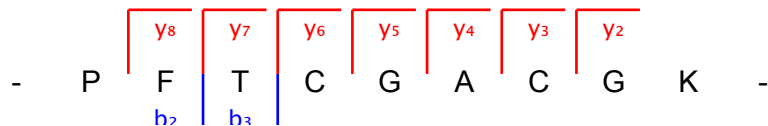

| Raw file                           | Scan  | Method   | Score | m/z    | Gene names |
|------------------------------------|-------|----------|-------|--------|------------|
| 20140918_fract12_dyn_5ul_E4_01_380 | 11045 | TOF; CID | 64.22 | 705.87 | SAMD10     |

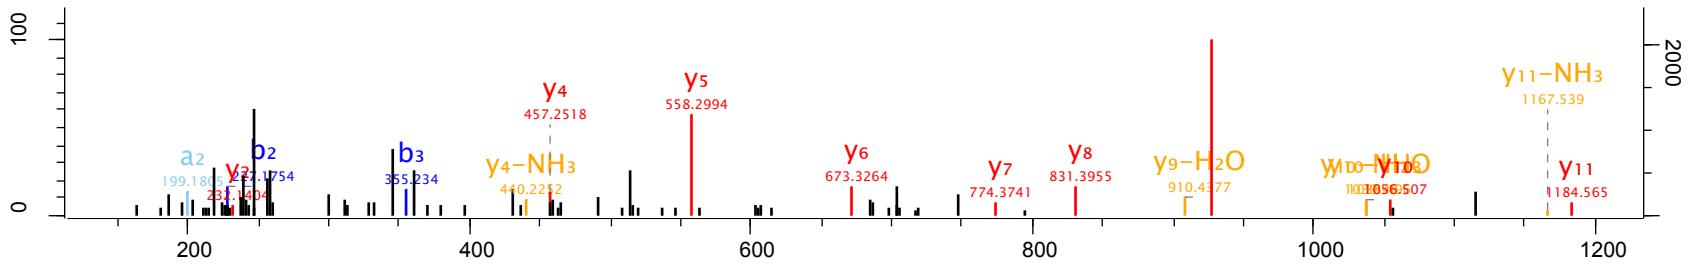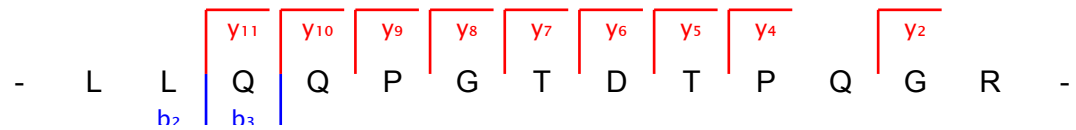

Raw file

20140918\_fract12\_dyn\_5ul\_E4\_01\_380

Scan

14311

Method

TOF; CID

Score

53.56

m/z

799.41

Gene names

DMWD

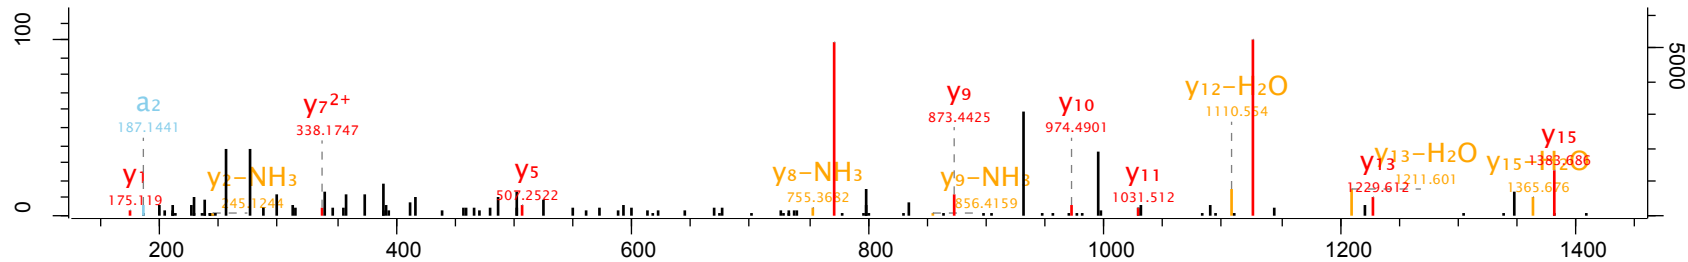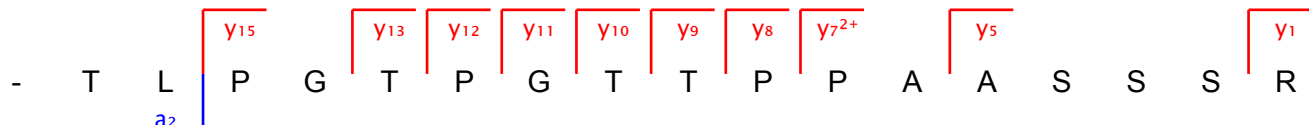

| Raw file                           | Scan  | Method   | Score  | m/z    | Gene names |
|------------------------------------|-------|----------|--------|--------|------------|
| 20140918_fract12_dyn_5ul_E4_01_380 | 14421 | TOF; CID | 124.42 | 587.31 | SULT1E1    |

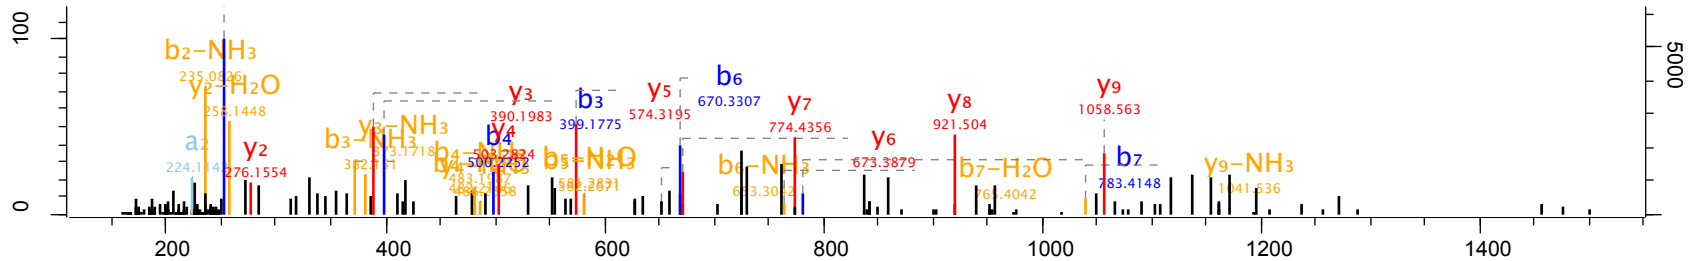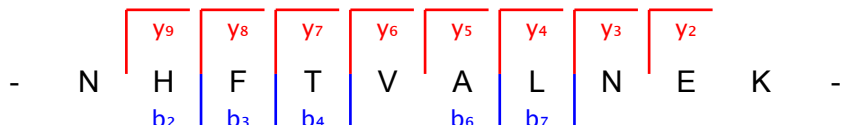

Raw file

20140918\_fract12\_dyn\_5ul\_E4\_01\_380

Scan

14666

Method

TOF; CID

Score

62.47

m/z

558.31

Gene names

GJA8

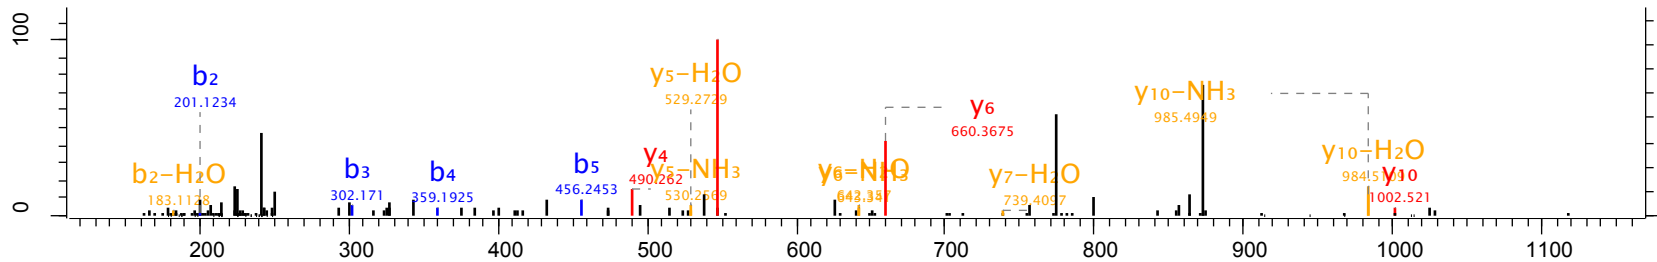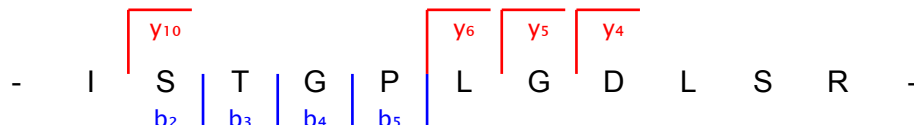

Raw file

20140918\_fract12\_dyn\_5ul\_E4\_01\_380

Scan

20560

Method

TOF; CID

Score

77.64

m/z

655.82

Gene names

CLEC2B

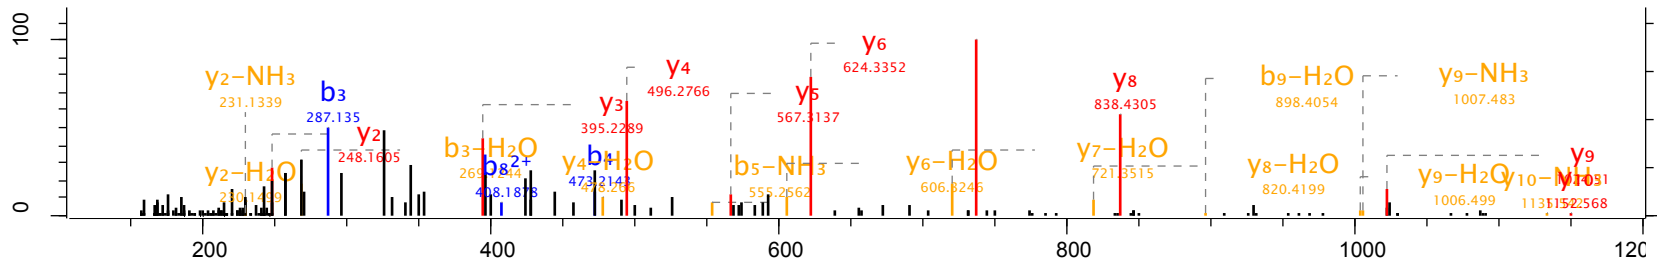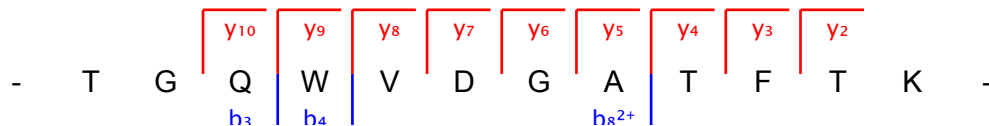



| Raw file                           | Scan  | Method   | Score | m/z    | Gene names |
|------------------------------------|-------|----------|-------|--------|------------|
| 20140918_fract12_dyn_5ul_E4_01_380 | 21996 | TOF; CID | 89.35 | 524.25 | BTN2A2     |

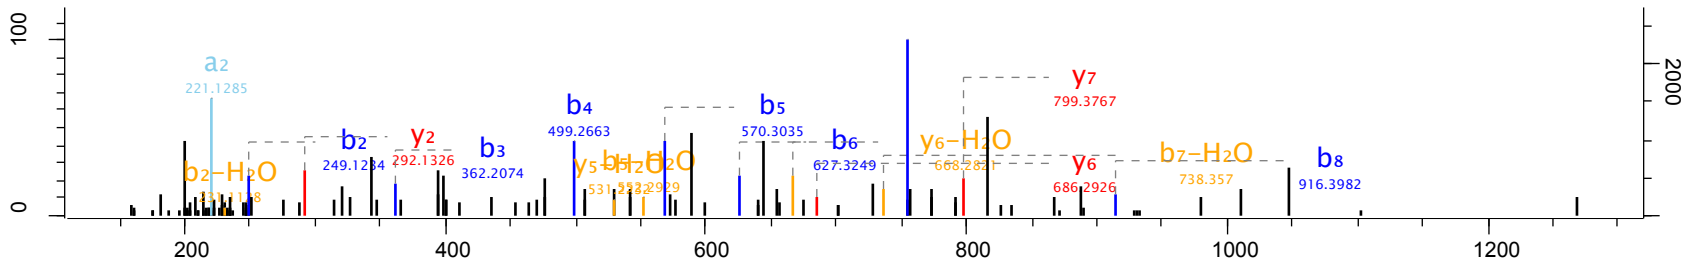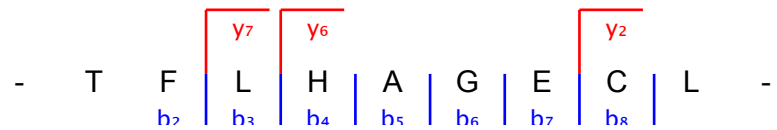

Raw file

20140918\_fract12\_dyn\_5ul\_E4\_01\_380

Scan

22288

Method

TOF; CID

Score

49.14

m/z

953.1

Gene names

C6orf120

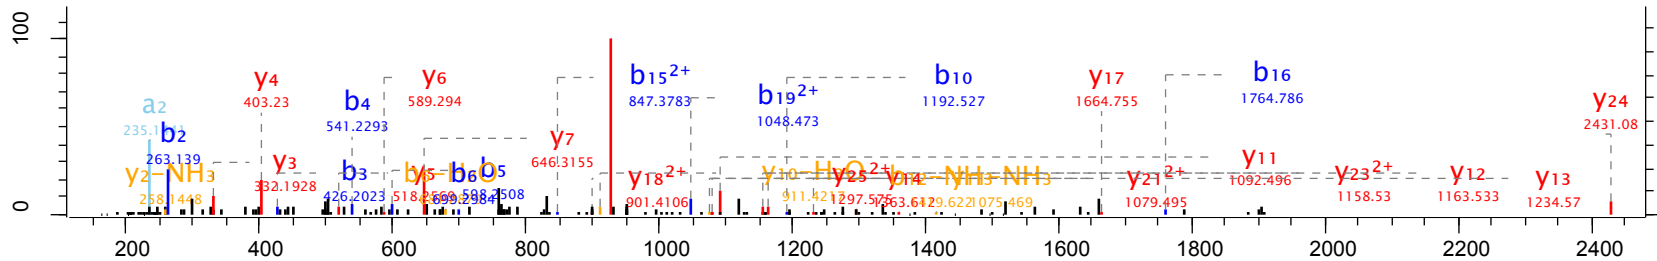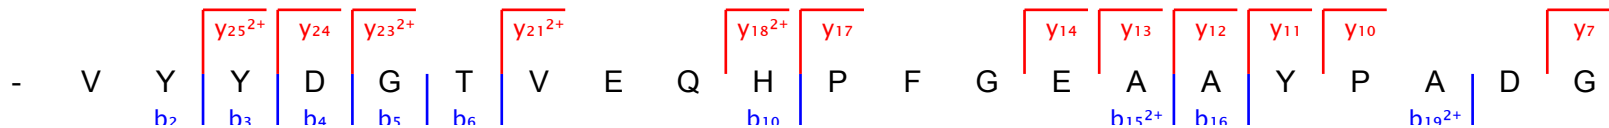

Raw file

20140918\_fract12\_dyn\_5ul\_E4\_01\_380

Scan

24532

Method

TOF; CID

Score

71.56

m/z

535.6

Gene names

C12orf49

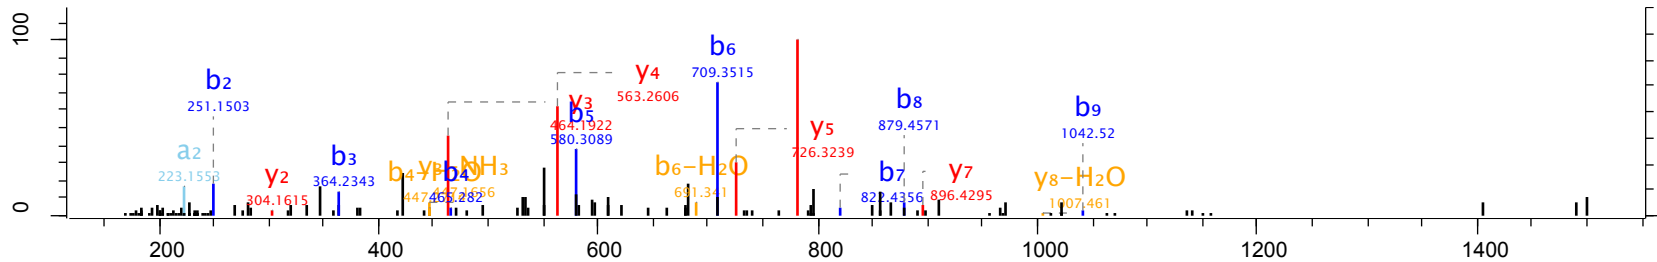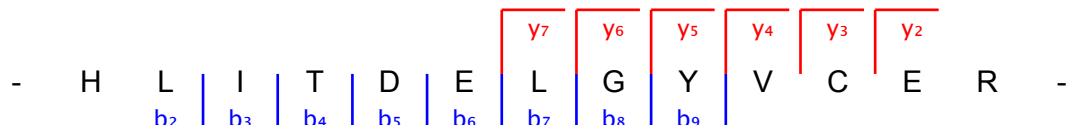

Raw file

20140918\_fract12\_dyn\_5ul\_E4\_01\_380

Scan

26404

Method

TOF; CID

Score

90.79

m/z

486.95

Gene names

TIGD1

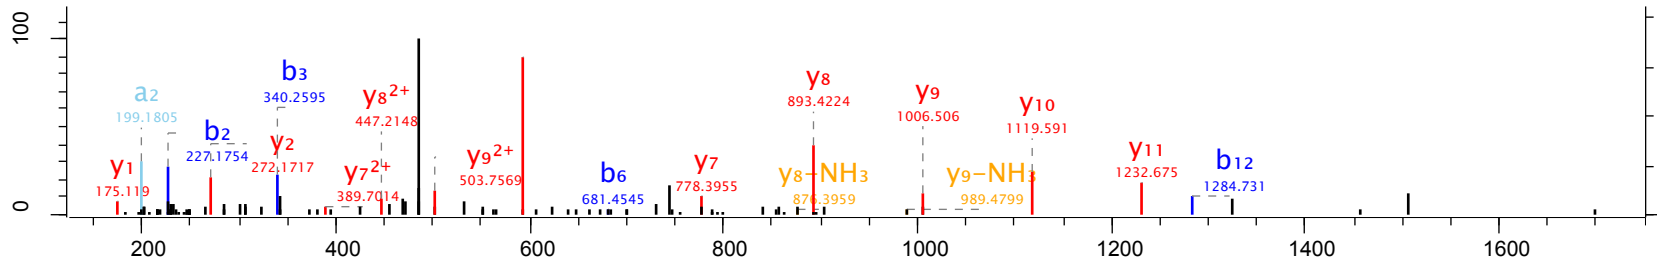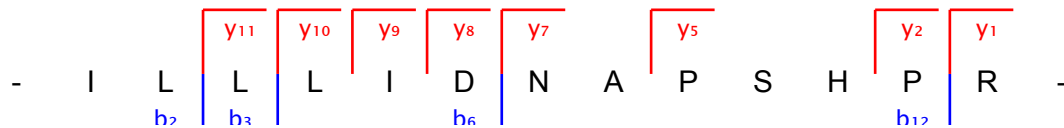

| Raw file                           | Scan  | Method   | Score | m/z    | Gene names |
|------------------------------------|-------|----------|-------|--------|------------|
| 20140918_fract12_dyn_5ul_E4_01_380 | 26677 | TOF; CID | 55.66 | 653.31 | HDAC10     |

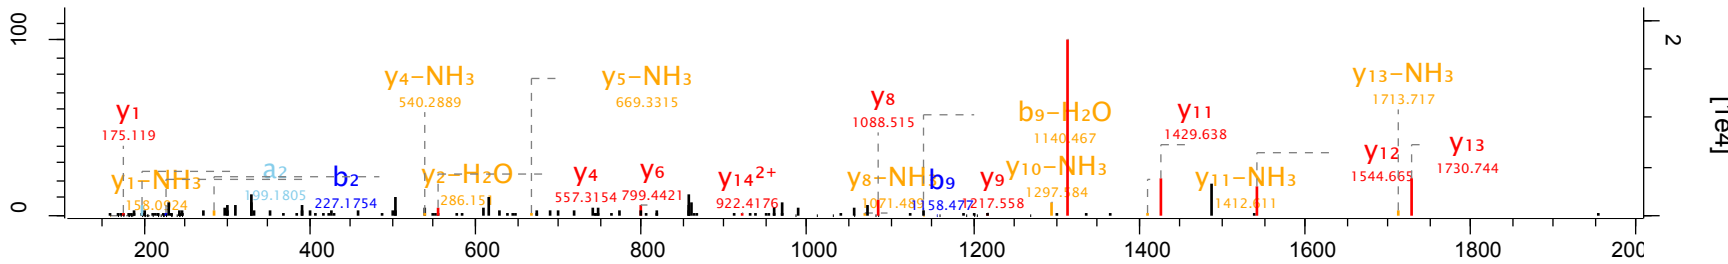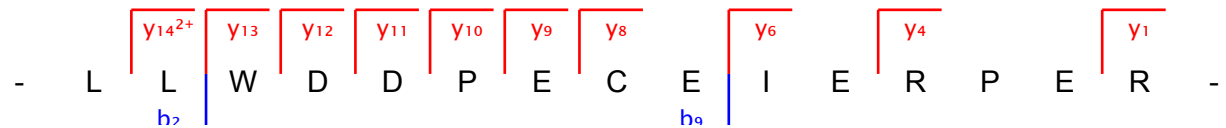

Raw file

20140918\_fract12\_dyn\_5ul\_E4\_01\_380

Scan

27276

Method

TOF; CID

Score

128.01

m/z

667.83

Gene names

LRRC8B

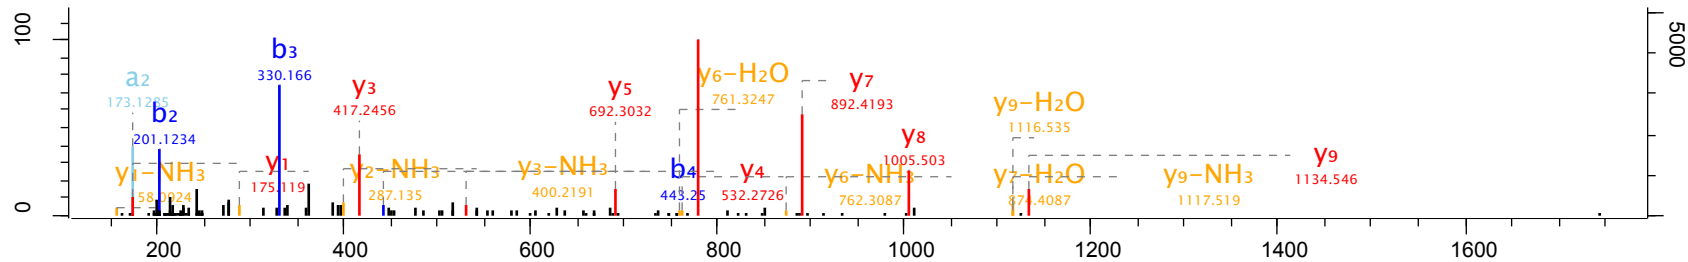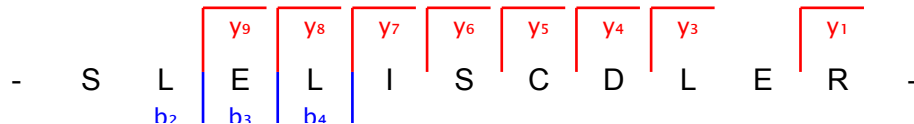

| Raw file                           | Scan  | Method   | Score  | m/z    | Gene names |
|------------------------------------|-------|----------|--------|--------|------------|
| 20140918_fract12_dyn_5ul_E4_01_380 | 28706 | TOF; CID | 101.33 | 710.84 | SLC39A13   |

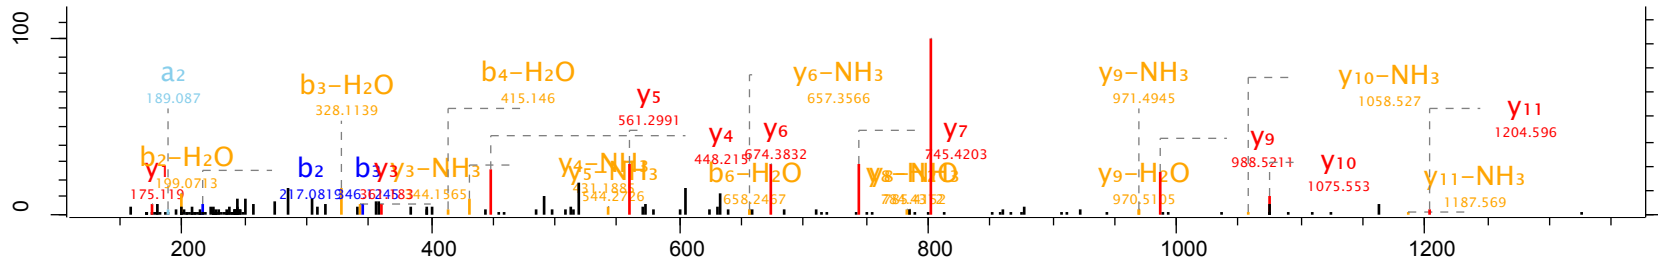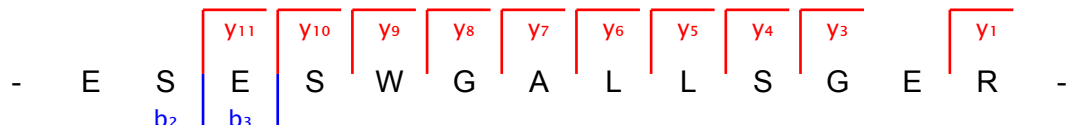

Raw file

20140918\_fract12\_dyn\_5ul\_E4\_01\_380

Scan

29259

Method

TOF; CID

Score

122.13

m/z

516.24

Gene names

B9D1

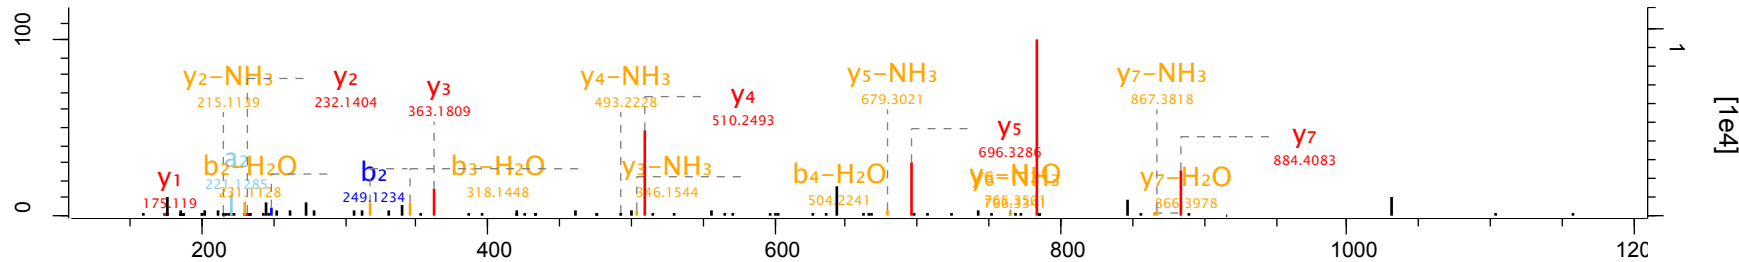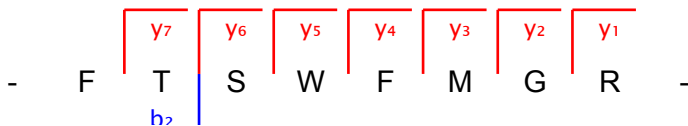



Raw file

20140918\_fract12\_dyn\_5ul\_E4\_01\_380

Scan

29316

Method

TOF; CID

Score

79.66

m/z

622.37

Gene names

MT-ATP6

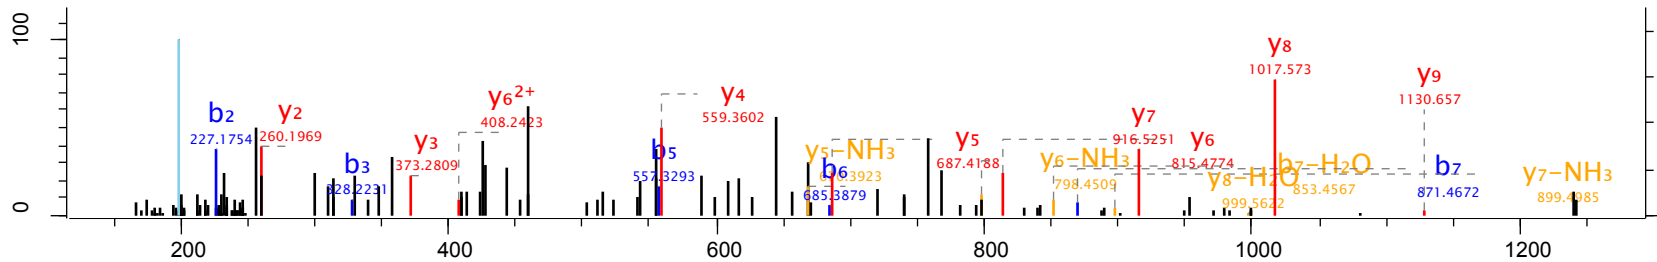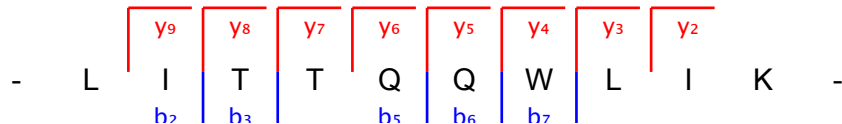

| Raw file                           | Scan  | Method   | Score | m/z     | Gene names |
|------------------------------------|-------|----------|-------|---------|------------|
| 20140918_fract12_dyn_5ul_E4_01_380 | 29656 | TOF; CID | 93.37 | 1247.65 | CDH19      |

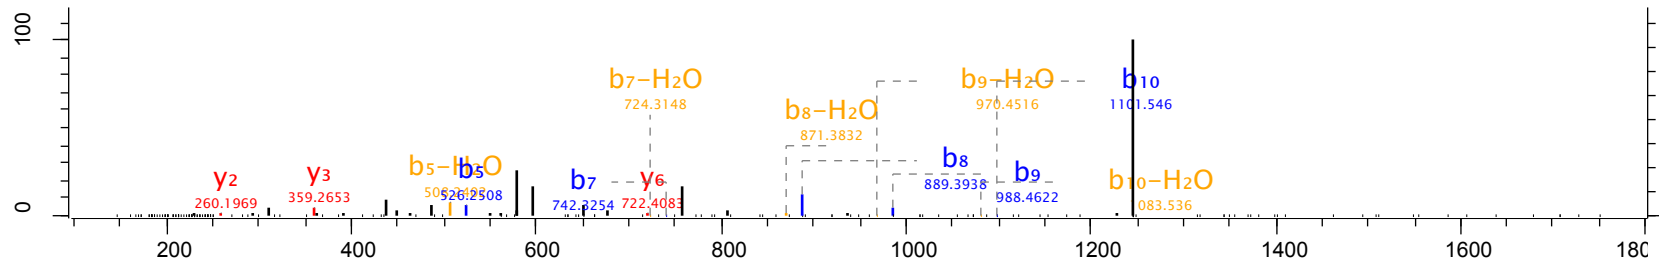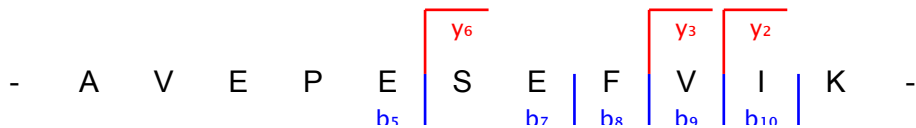

[1e5]

Raw file

20140918\_fract12\_dyn\_5ul\_E4\_01\_380

Scan

30218

Method

TOF; CID

Score

84.33

m/z

879.1

Gene names

RARA

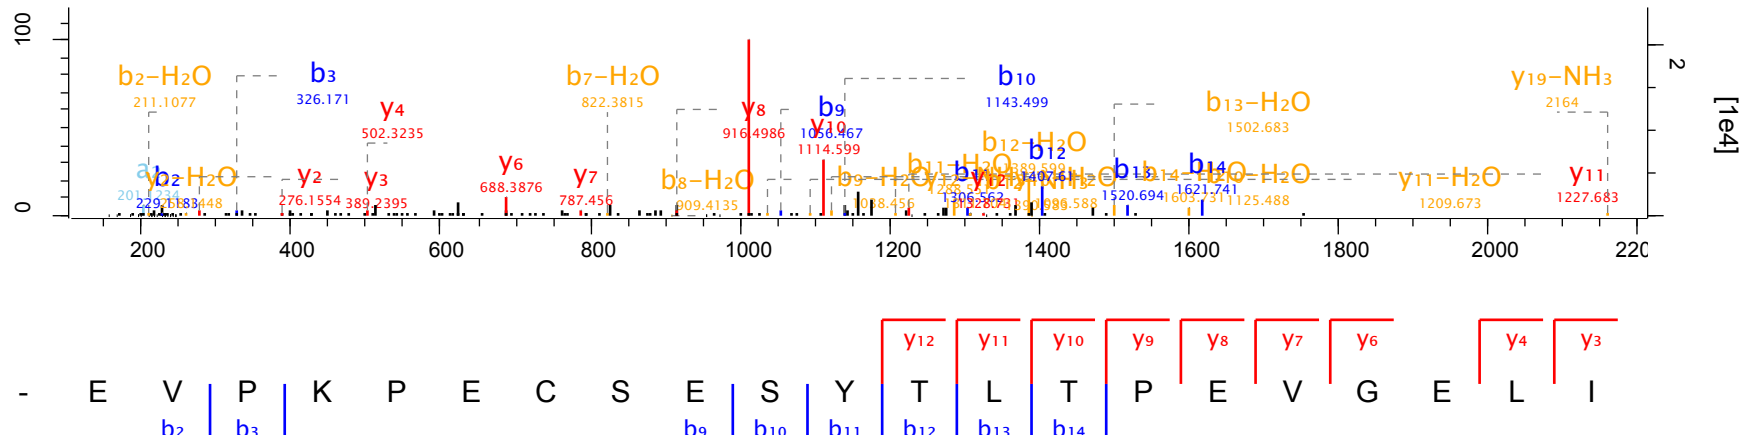

Raw file

20140918\_fract12\_dyn\_5ul\_E4\_01\_380

Scan

32309

Method

TOF; CID

Score

104.88

m/z

531.29

Gene names

DUSP19

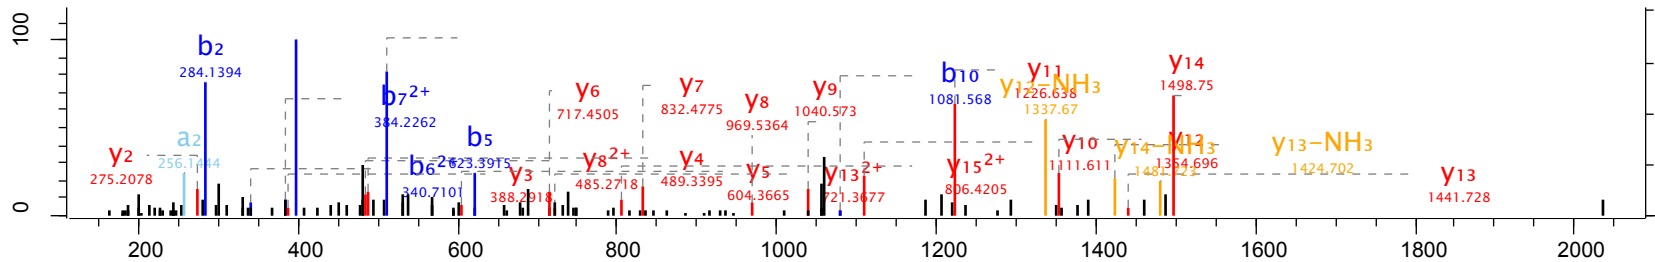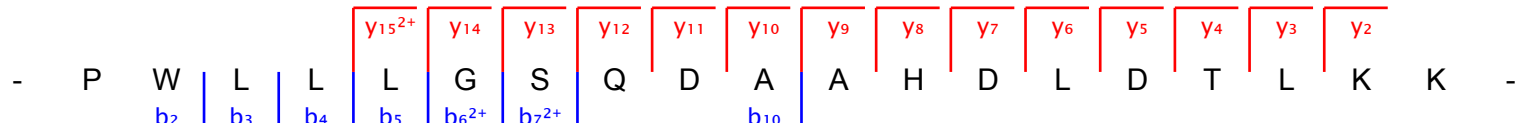

| Raw file                           | Scan  | Method   | Score | m/z    | Gene names |
|------------------------------------|-------|----------|-------|--------|------------|
| 20140918_fract12_dyn_5ul_E4_01_380 | 35495 | TOF; CID | 96.46 | 574.65 | ZMYND19    |

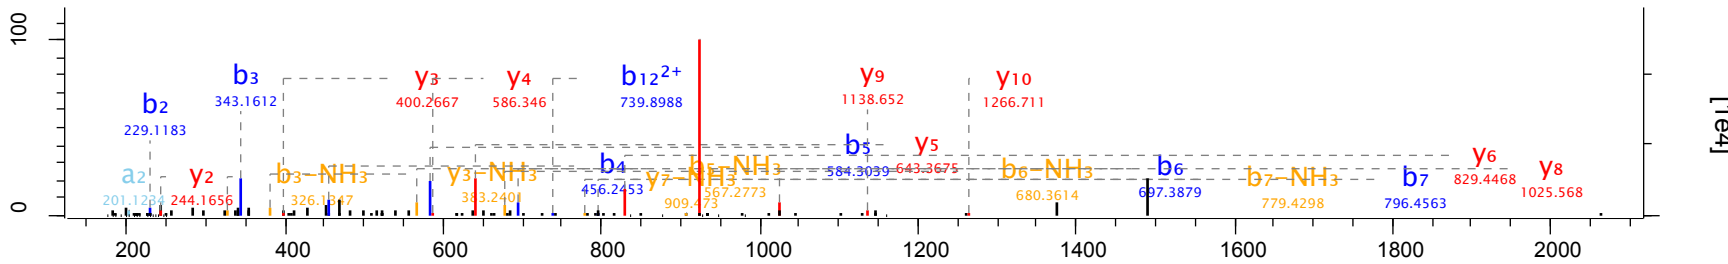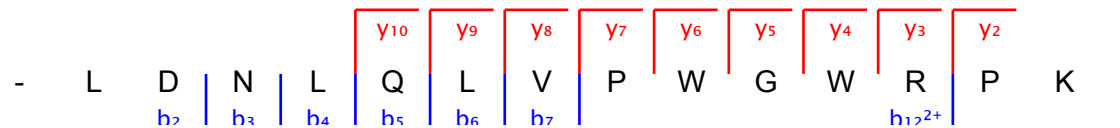

Raw file

20140918\_fract12\_dyn\_5ul\_E4\_01\_380

Scan

35864

Method

TOF; CID

Score

134.29

m/z

666.09

Gene names

SLC39A8

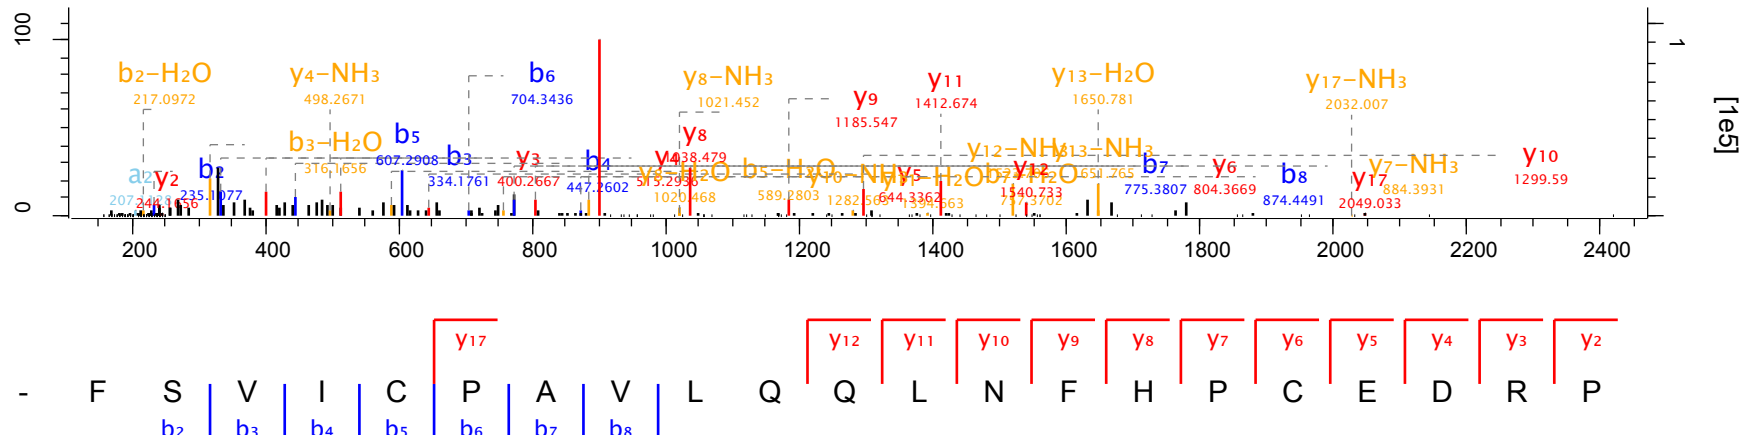

Raw file

20140918\_fract13\_dyn\_5ul\_E5\_01\_381

Scan

22797

Method

TOF; CID

Score

63.49

m/z

972.43

Gene names

LYPD3

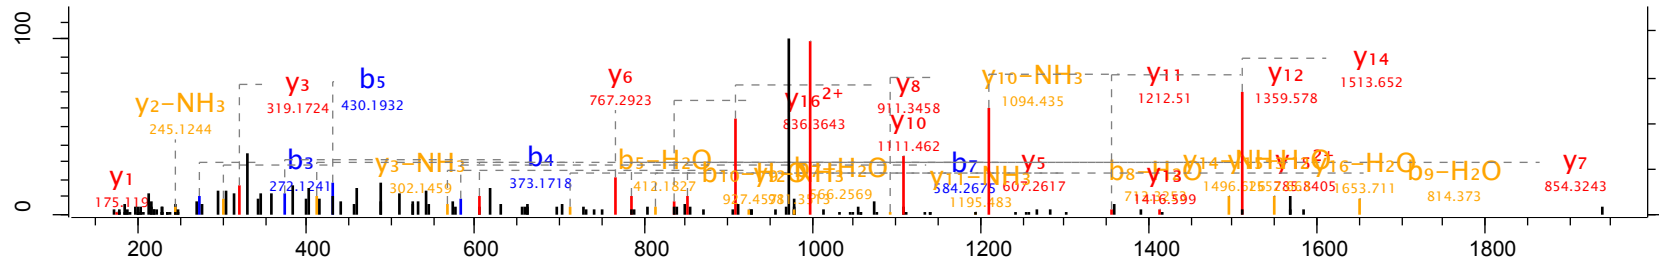

- D G V T G P G F T L S G S C C Q G S R -

$y_{16}^{2+}$   $y_{15}^{2+}$   $y_{14}$   $y_{13}$   $y_{12}$   $y_{11}$   $y_{10}$   $y_9$   $y_8$   $y_7$   $y_6$   $y_5$   $y_3$   $y_1$   
 $b_3$   $b_4$   $b_5$   $b_7$

| Raw file                           | Scan  | Method   | Score  | m/z     | Gene names |
|------------------------------------|-------|----------|--------|---------|------------|
| 20140918_fract13_dyn_5ul_E5_01_381 | 24186 | TOF; CID | 116.24 | 1031.46 | TM2D2      |

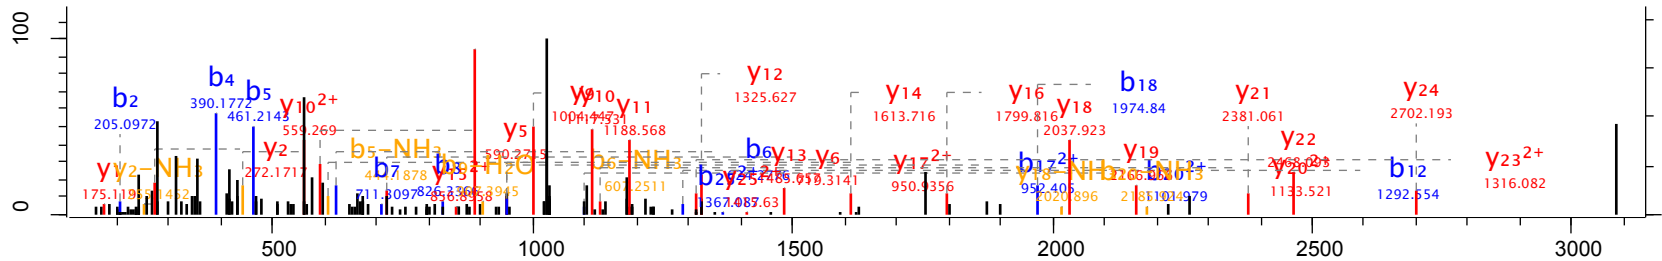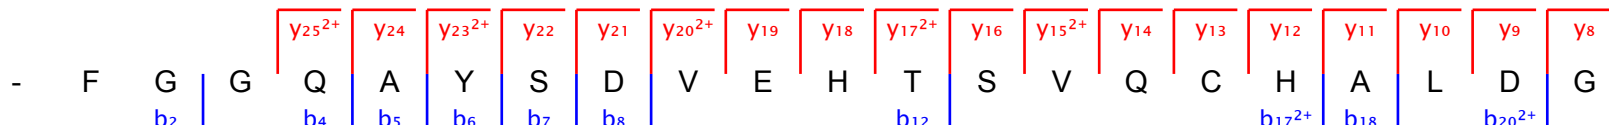



| Raw file                           | Scan  | Method   | Score  | m/z    | Gene names |
|------------------------------------|-------|----------|--------|--------|------------|
| 20140918_fract13_dyn_5ul_E5_01_381 | 24961 | TOF; CID | 100.73 | 747.37 | C19orf54   |

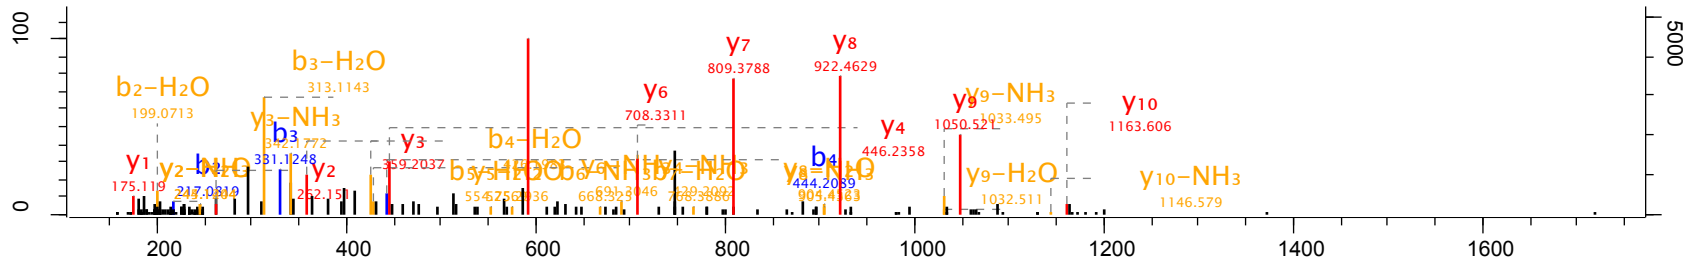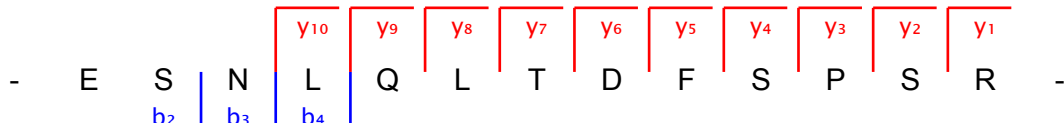

| Raw file                           | Scan  | Method   | Score | m/z    | Gene names |
|------------------------------------|-------|----------|-------|--------|------------|
| 20140918_fract13_dyn_5ul_E5_01_381 | 25017 | TOF; CID | 99.41 | 876.08 | NABP2      |

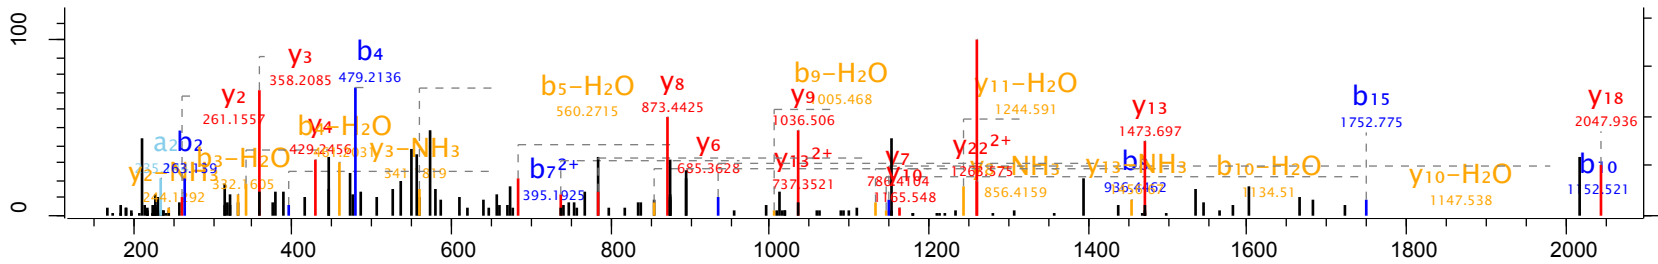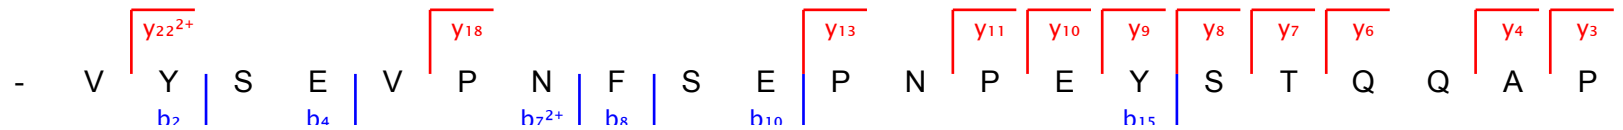

| Raw file                           | Scan  | Method   | Score | m/z    | Gene names |
|------------------------------------|-------|----------|-------|--------|------------|
| 20140918_fract13_dyn_5ul_E5_01_381 | 26313 | TOF; CID | 77.66 | 516.78 | RGS20      |

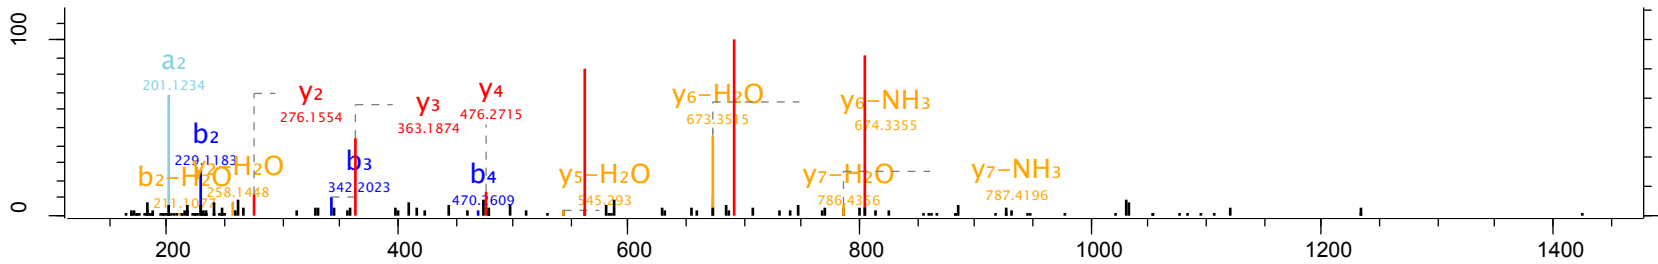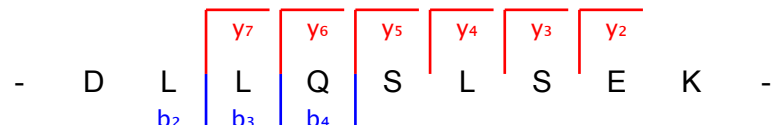

Raw file

20140918\_fract13\_dyn\_5ul\_E5\_01\_381

Scan

27792

Method

TOF; CID

Score

73.08

m/z

580.31

Gene names

GADD45A

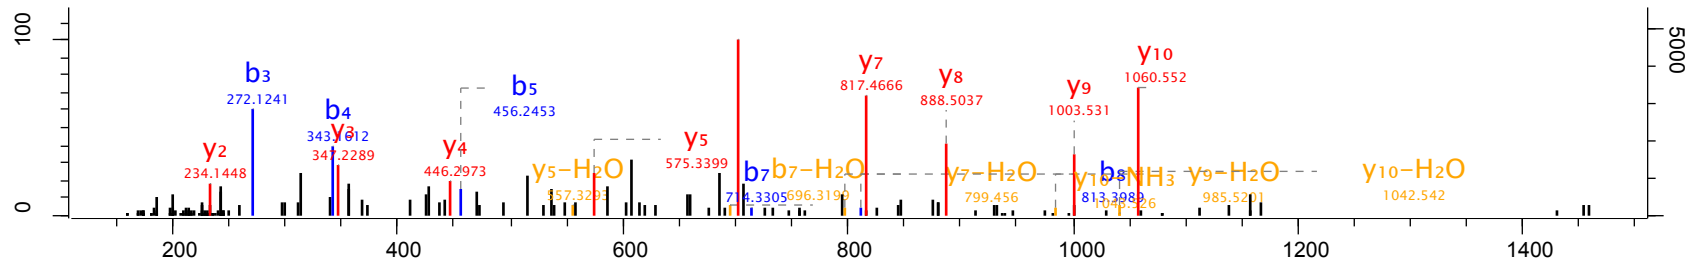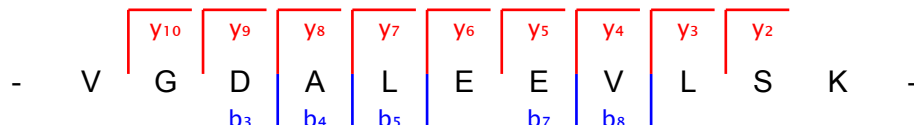

| Raw file                           | Scan  | Method   | Score | m/z    | Gene names |
|------------------------------------|-------|----------|-------|--------|------------|
| 20140918_fract13_dyn_5ul_E5_01_381 | 32232 | TOF; CID | 88.43 | 605.02 | ZFPM1      |

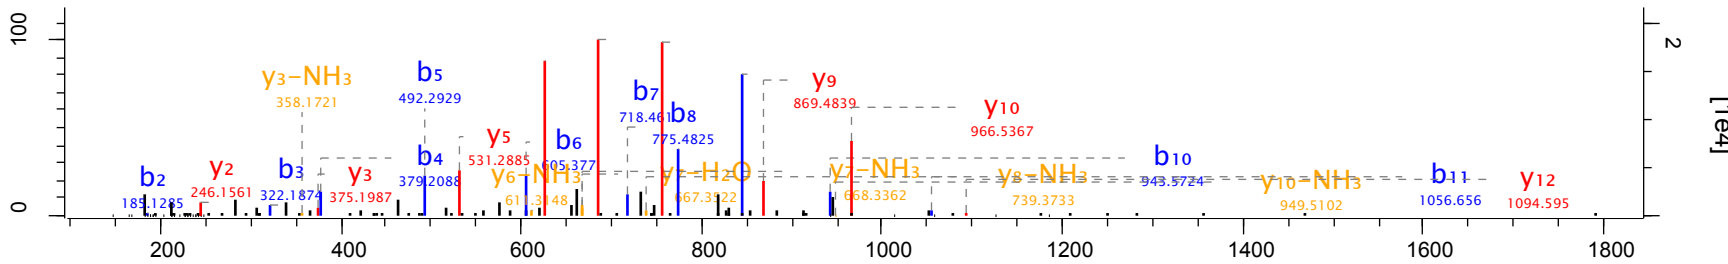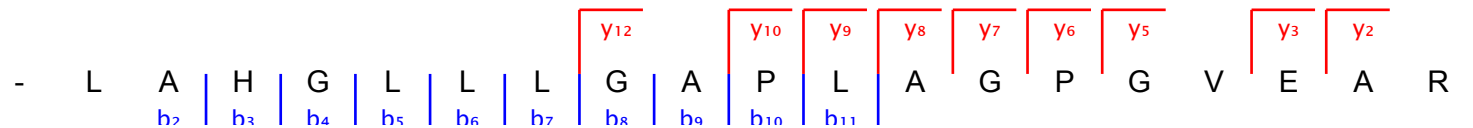

| Raw file                           | Scan  | Method   | Score | m/z    | Gene names |
|------------------------------------|-------|----------|-------|--------|------------|
| 20140918_fract13_dyn_5ul_E5_01_381 | 33194 | TOF; CID | 74.99 | 745.38 | PPARGC1B   |

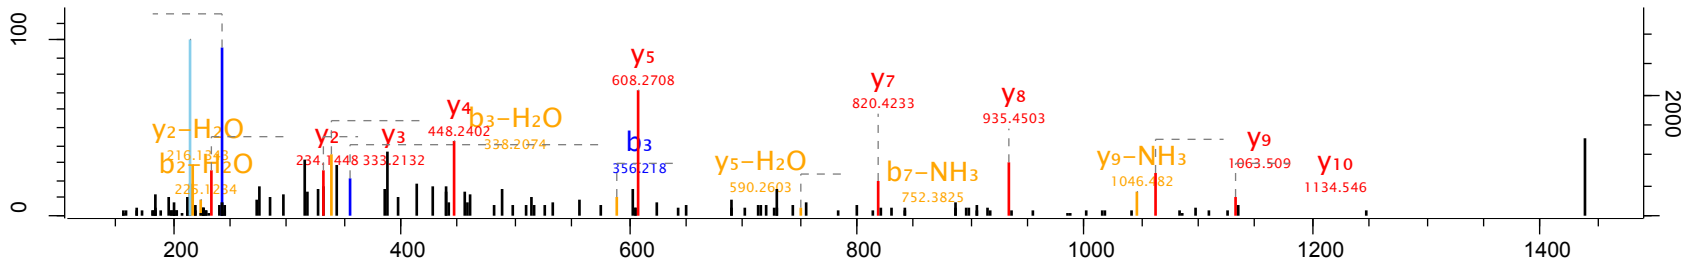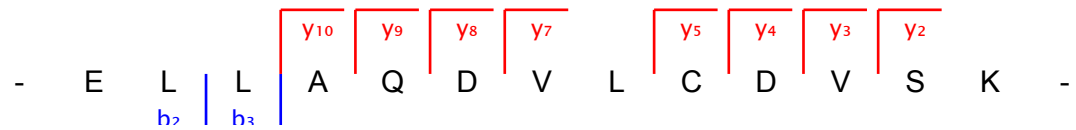

Raw file

20140918\_fract13\_dyn\_5ul\_E5\_01\_381

Scan

33269

Method

TOF; CID

Score

72.89

m/z

707.41

Gene names

MRI

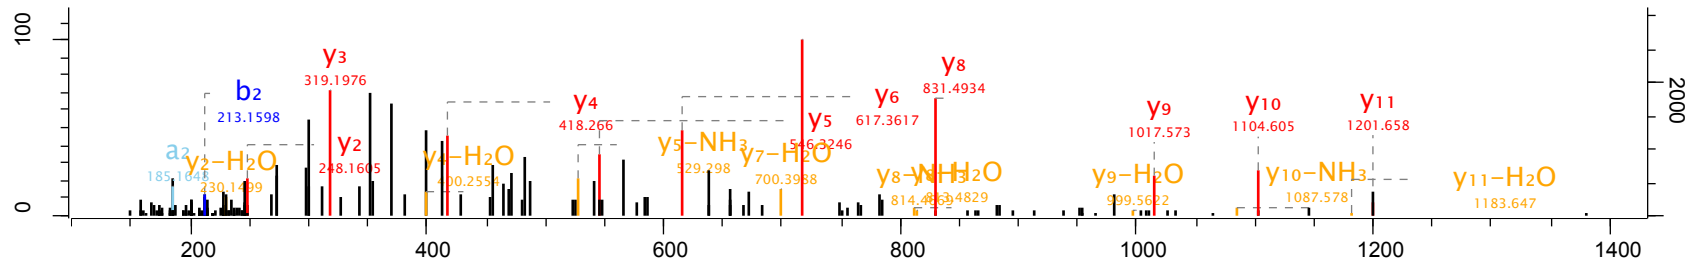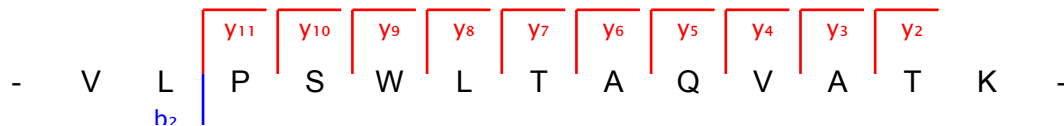

| Raw file                           | Scan  | Method   | Score | m/z    | Gene names |
|------------------------------------|-------|----------|-------|--------|------------|
| 20140918_fract13_dyn_5ul_E5_01_381 | 35481 | TOF; CID | 73.5  | 603.35 | IP6K2      |

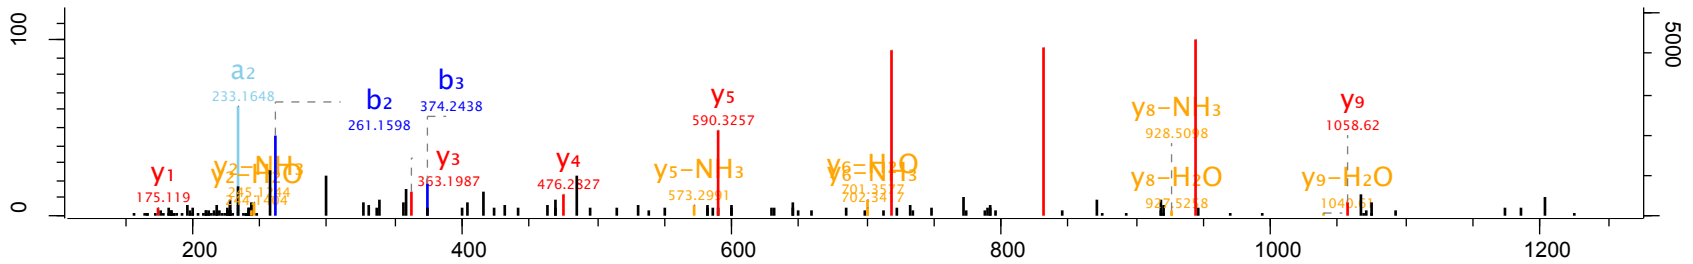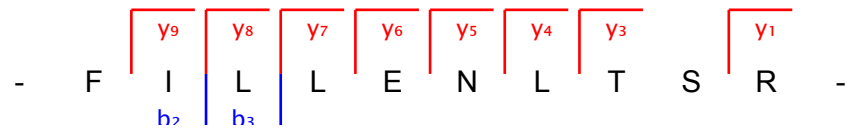



Raw file

20140918\_fract13\_dyn\_5ul\_E5\_01\_381

Scan

36102

Method

TOF; CID

Score

34.41

m/z

1036.49

Gene names

PHLPP2

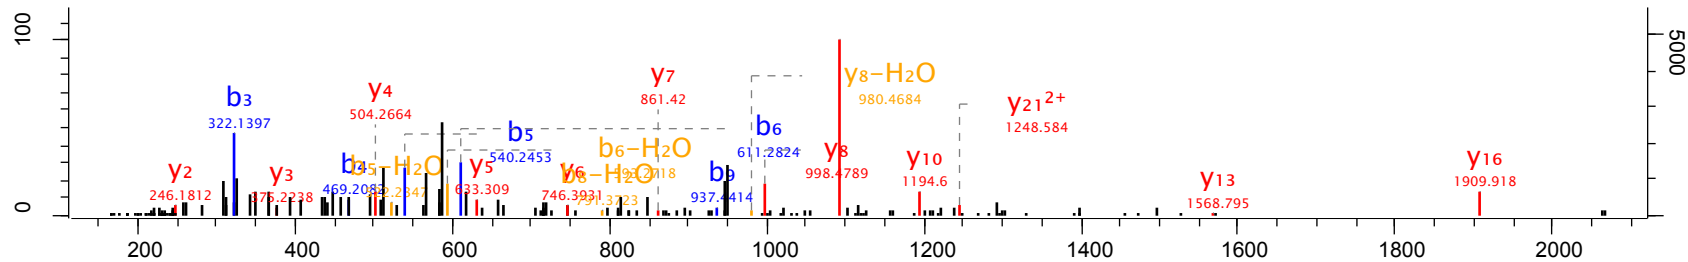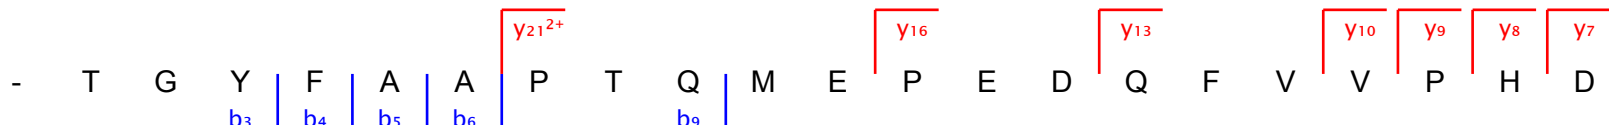

Raw file

20140918\_fract13\_dyn\_5ul\_E5\_01\_381

Scan

37516

Method

TOF; CID

Score

63.68

m/z

880.42

Gene names

TPM4

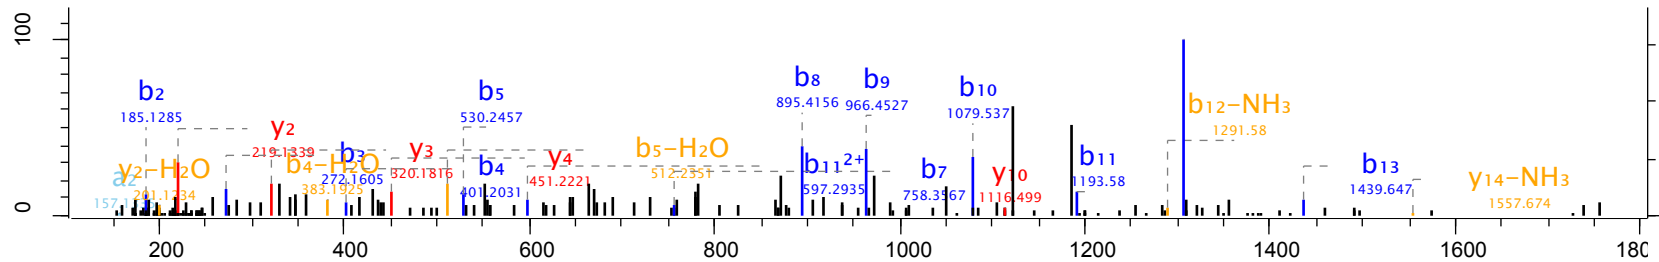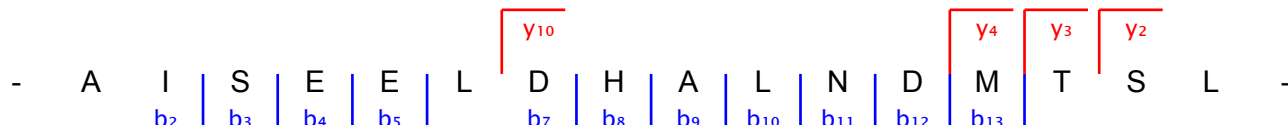

Raw file

20140918\_fract14\_dyn\_5ul\_E6\_01\_382

Scan

9962

Method

TOF; CID

Score

51.5

m/z

735.88

Gene names

PPP1R26

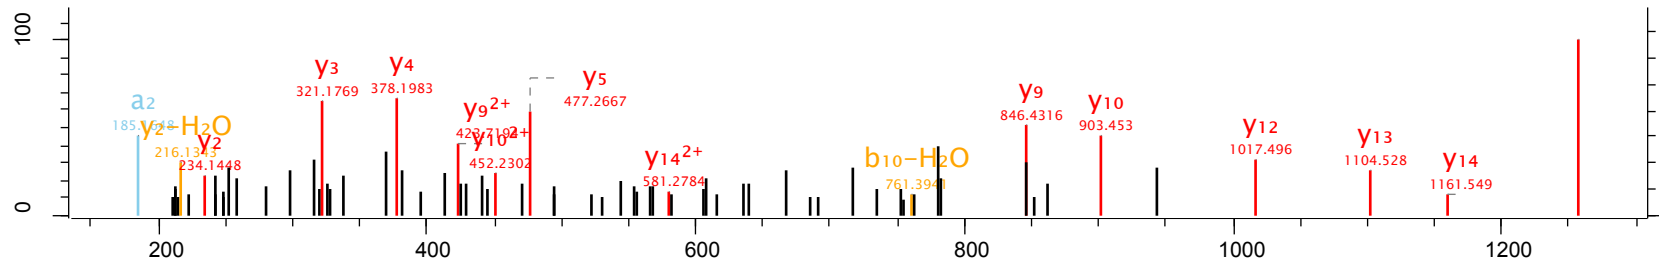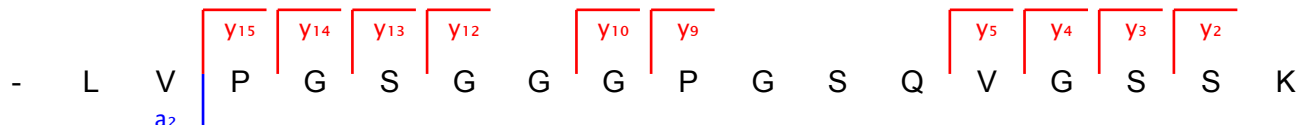

Raw file

20140918\_fract14\_dyn\_5ul\_E6\_01\_382

Scan

10509

Method

TOF; CID

Score

42.95

m/z

543.27

Gene names

BNIP3L

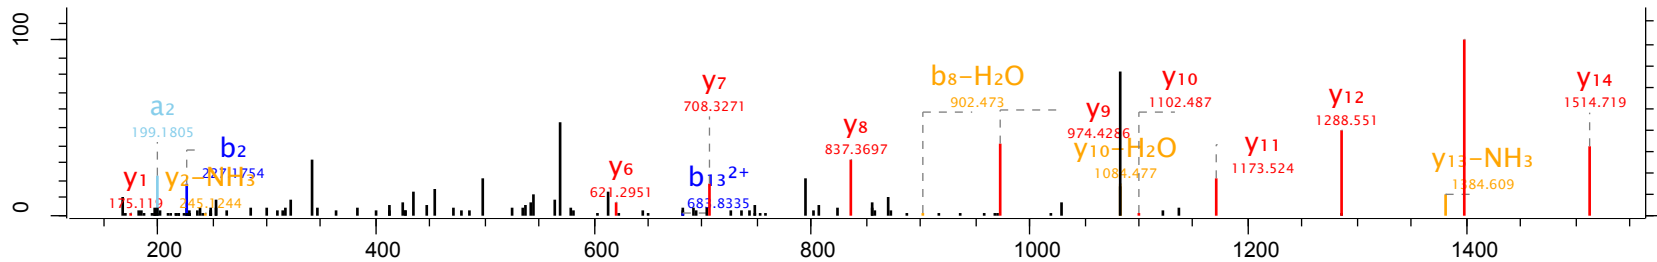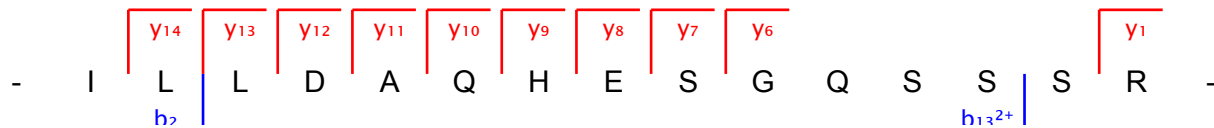

| Raw file                           | Scan  | Method   | Score  | m/z    | Gene names |
|------------------------------------|-------|----------|--------|--------|------------|
| 20140918_fract14_dyn_5ul_E6_01_382 | 13466 | TOF; CID | 103.69 | 430.92 | DPY19L3    |

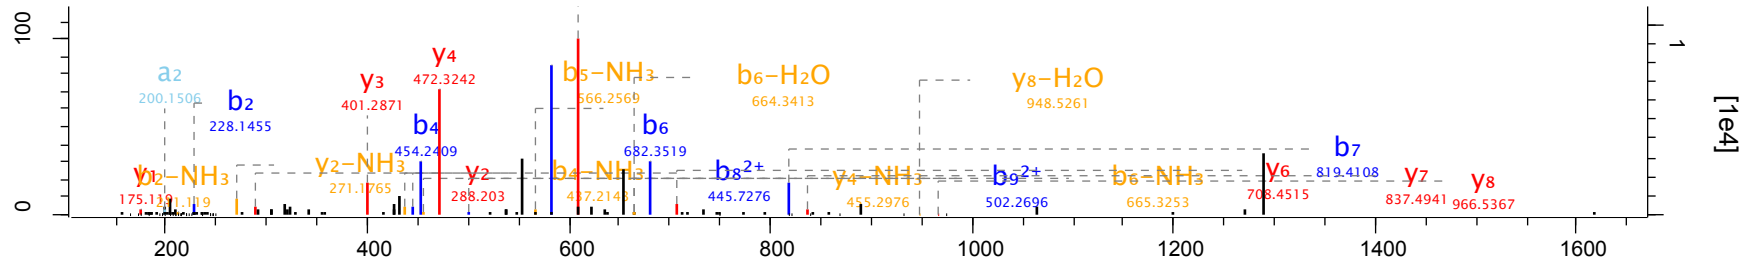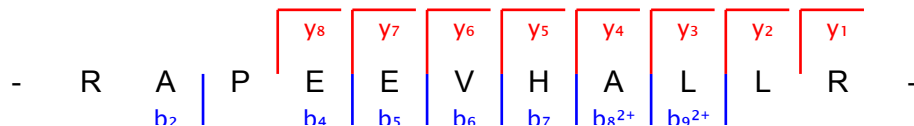

Raw file

20140918\_fract14\_dyn\_5ul\_E6\_01\_382

Scan

16840

Method

TOF; CID

Score

113.76

m/z

764.88

Gene names

LIN37

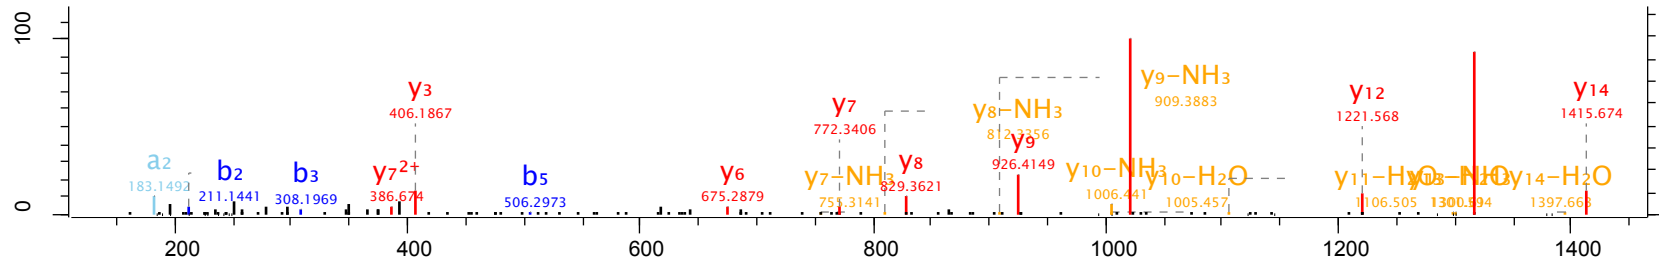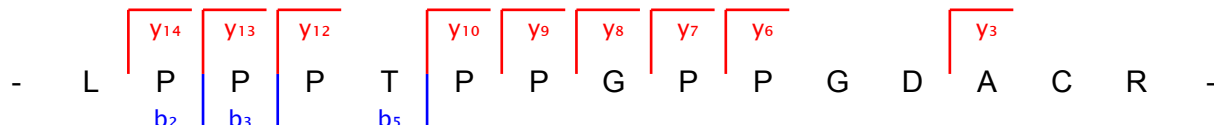

Raw file

20140918\_fract14\_dyn\_5ul\_E6\_01\_382

Scan

17177

Method

TOF; CID

Score

90.7

m/z

619.82

Gene names

PHF19

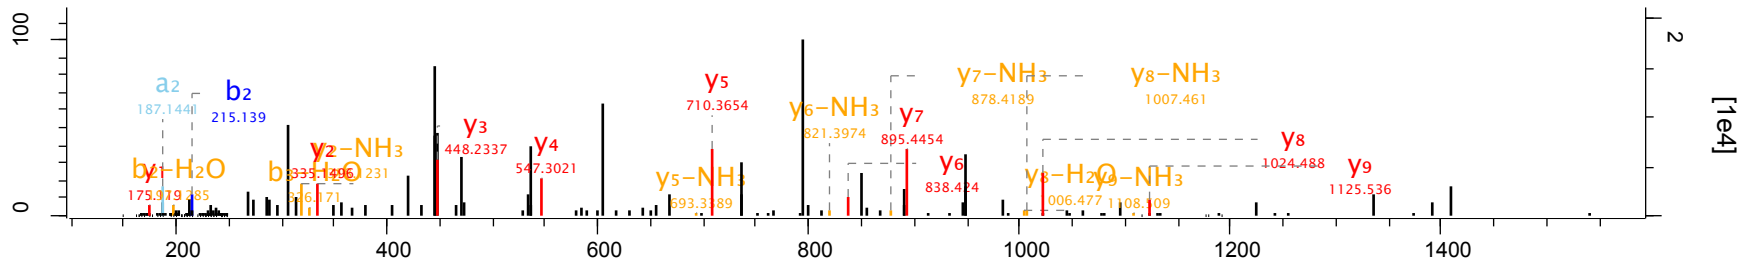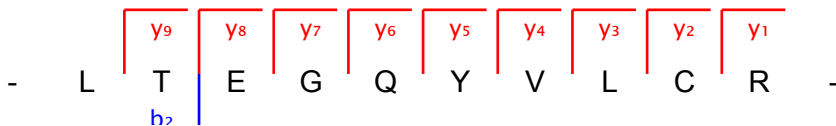

| Raw file                           | Scan  | Method   | Score | m/z    | Gene names |
|------------------------------------|-------|----------|-------|--------|------------|
| 20140918_fract14_dyn_5ul_E6_01_382 | 20987 | TOF; CID | 69.72 | 588.31 | ZDHHC14    |

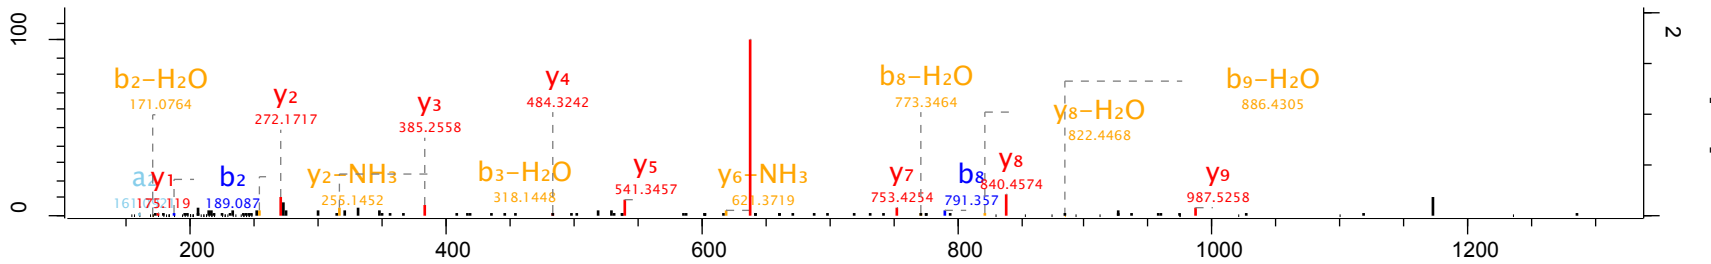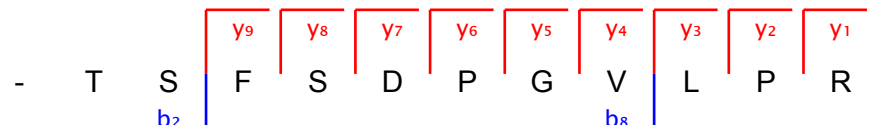



Raw file

20140918\_fract14\_dyn\_5ul\_E6\_01\_382

Scan

23391

Method

TOF; CID

Score

66.39

m/z

743.84

Gene names

OTX1

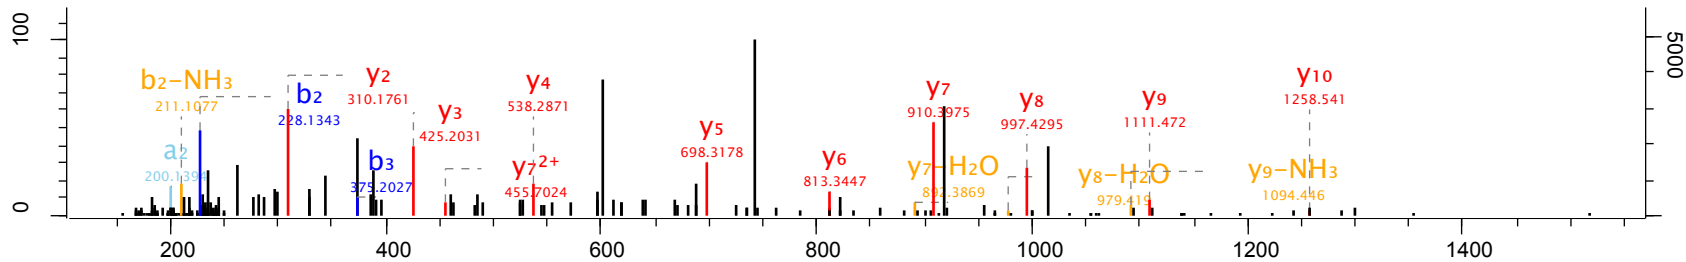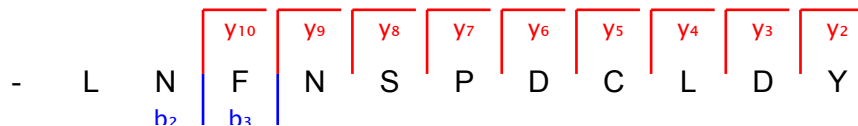

Raw file

20140918\_fract14\_dyn\_5ul\_E6\_01\_382

Scan

25573

Method

TOF; CID

Score

163.45

m/z

929.48

Gene names

HIATL1

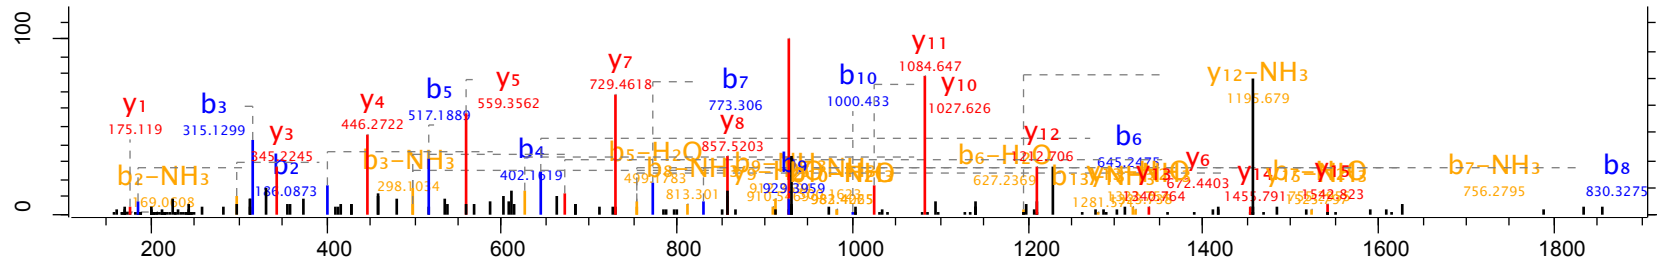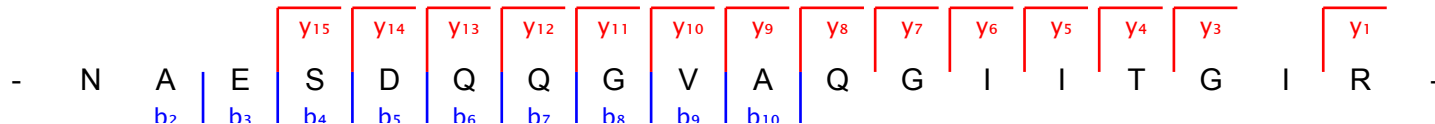

Raw file

20140918\_fract14\_dyn\_5ul\_E6\_01\_382

Scan

26190

Method

TOF; CID

Score

88.02

m/z

478.56

Gene names

WDR17

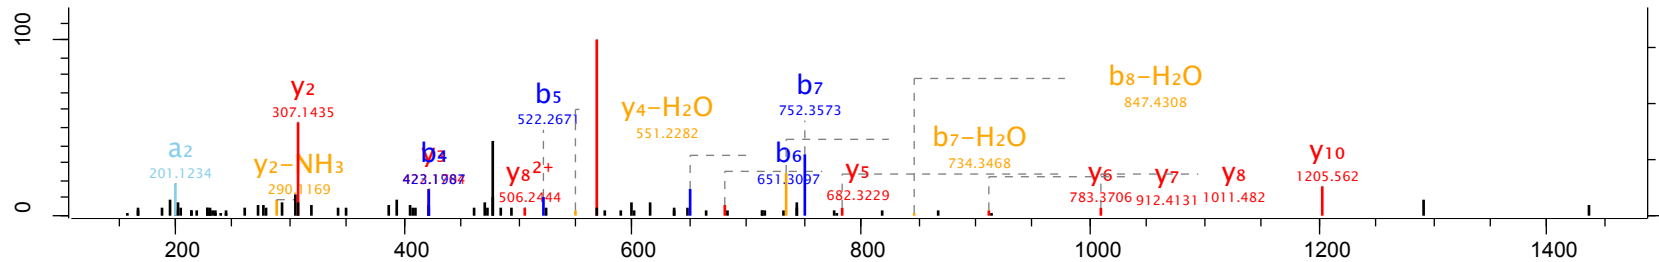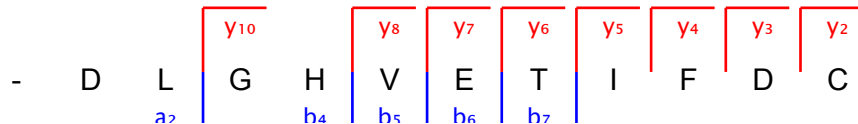

| Raw file                           | Scan  | Method   | Score | m/z    | Gene names |
|------------------------------------|-------|----------|-------|--------|------------|
| 20140918_fract14_dyn_5ul_E6_01_382 | 26406 | TOF; CID | 89.23 | 672.36 | SPATA13    |

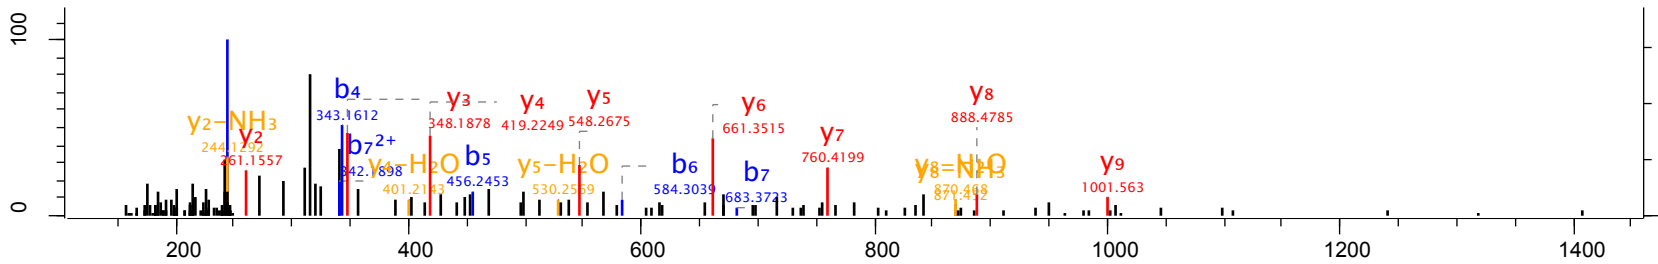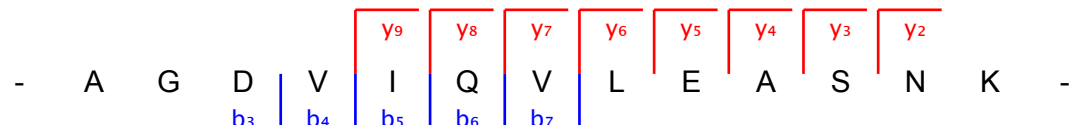

| Raw file                           | Scan  | Method   | Score  | m/z    | Gene names |
|------------------------------------|-------|----------|--------|--------|------------|
| 20140918_fract14_dyn_5ul_E6_01_382 | 27979 | TOF; CID | 116.24 | 731.87 | TSPAN15    |

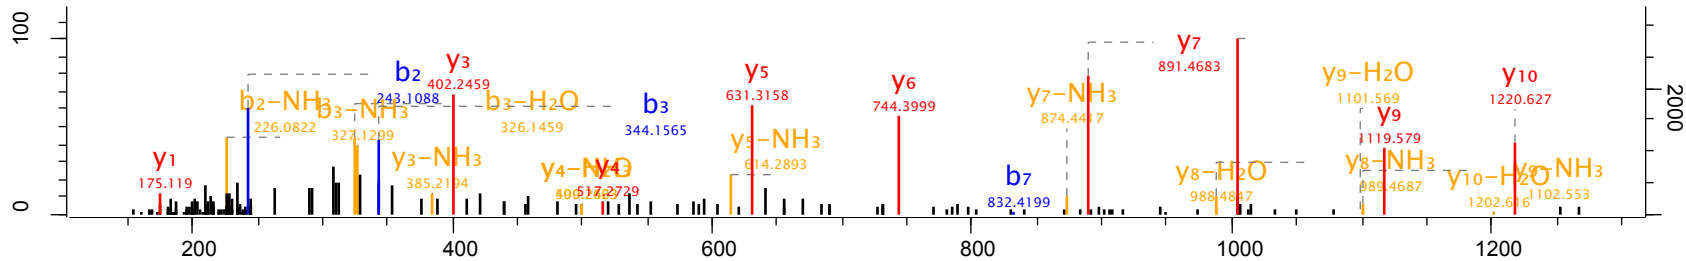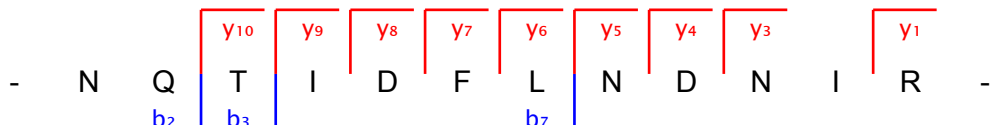

Raw file 20140918\_fract14\_dyn\_5ul\_E6\_01\_382 Scan 28753 Method TOF; CID Score 123.5 m/z 575.3 Gene names JOSD1

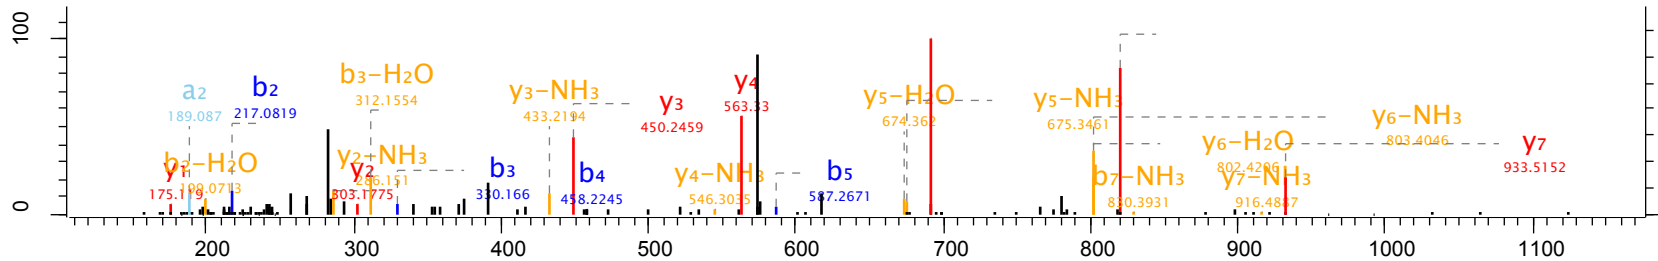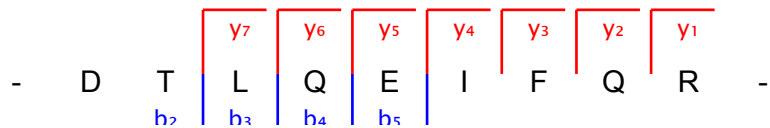

Raw file

20140918\_fract14\_dyn\_5ul\_E6\_01\_382

Scan

32306

Method

TOF; CID

Score

94.49

m/z

856.38

Gene names

MSANTD4

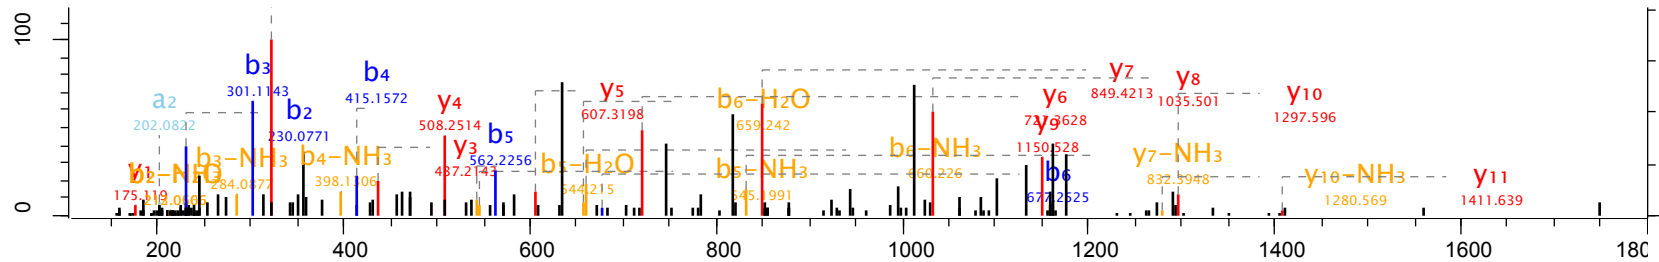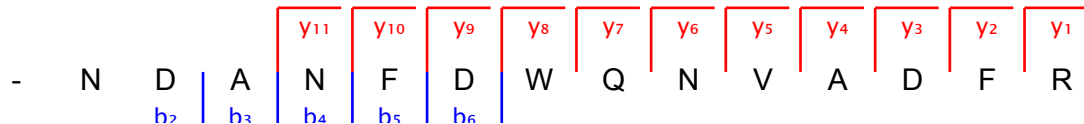

Raw file

20140918\_fract14\_dyn\_5ul\_E6\_01\_382

Scan

34095

Method

TOF; CID

Score

37.88

m/z

730.02

Gene names

PTPRH

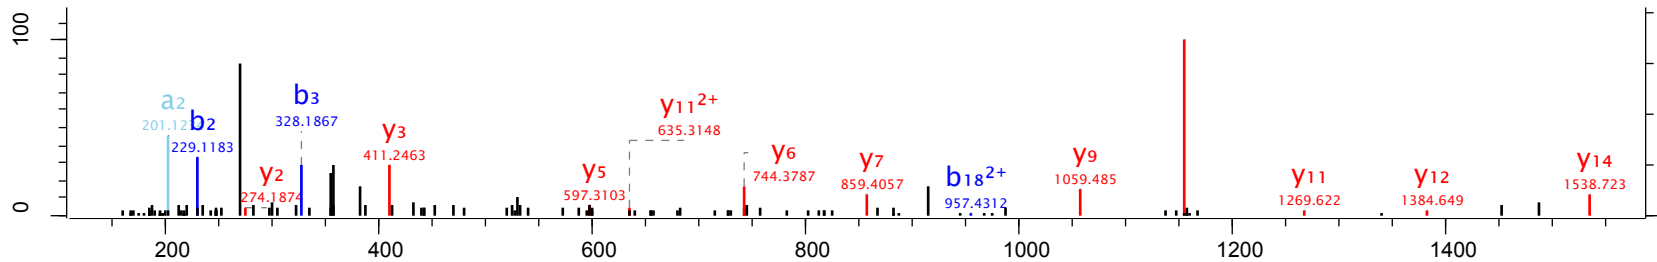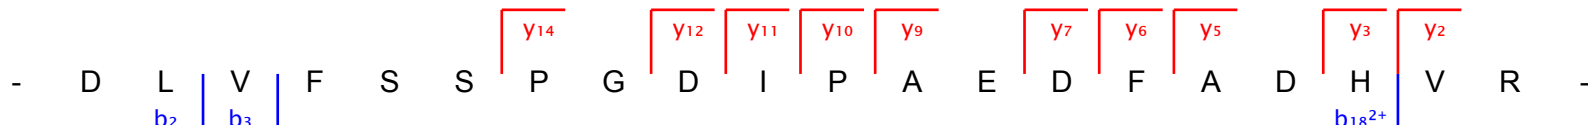



Raw file

20140918\_fract14\_dyn\_5ul\_E6\_01\_382

Scan

38899

Method

TOF; CID

Score

73.07

m/z

907.8

Gene names

HIGD2A

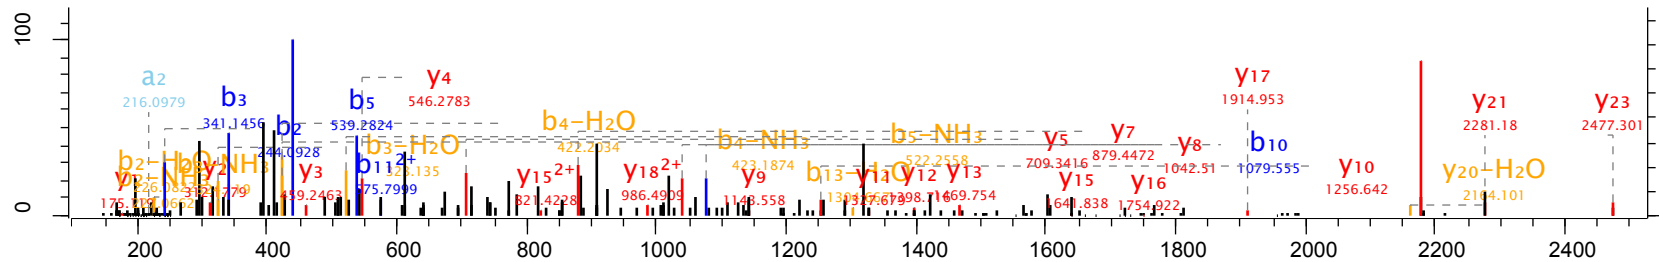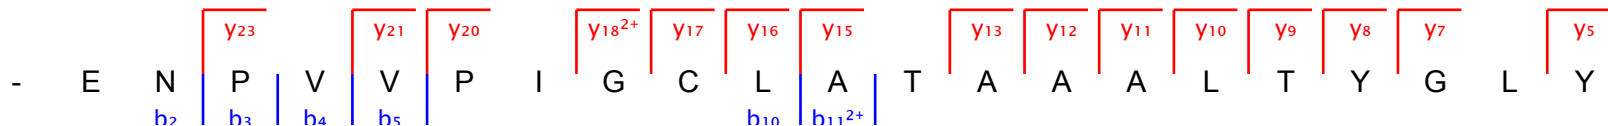

Raw file

20140918\_fract15\_dyn\_5ul\_E7\_01\_383

Scan

7412

Method

TOF; CID

Score

73.08

m/z

417.89

Gene names

SPATA33

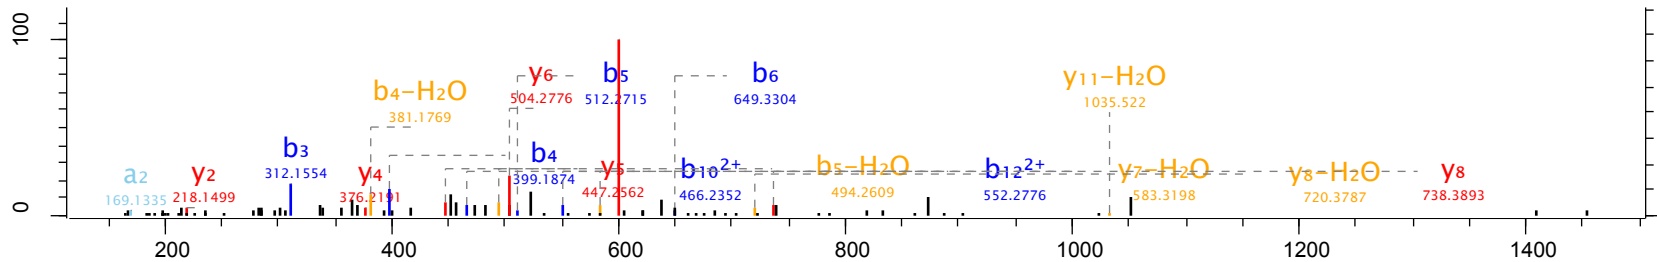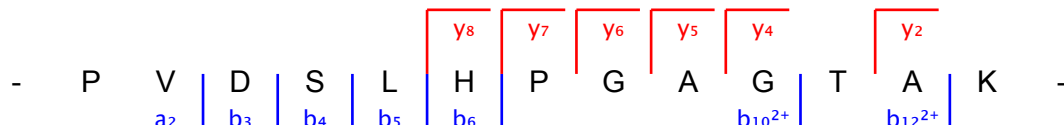

Raw file

20140918\_fract15\_dyn\_5ul\_E7\_01\_383

Scan

10912

Method

TOF; CID

Score

109.72

m/z

613.83

Gene names

TMC7

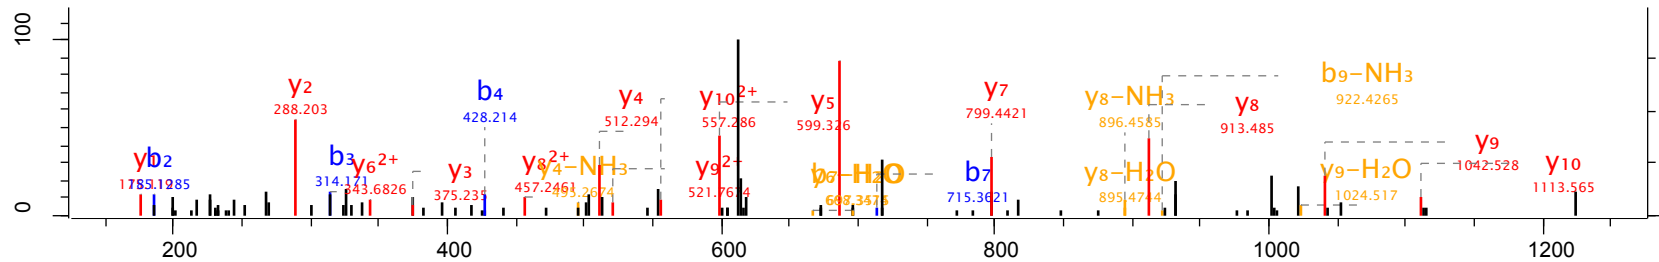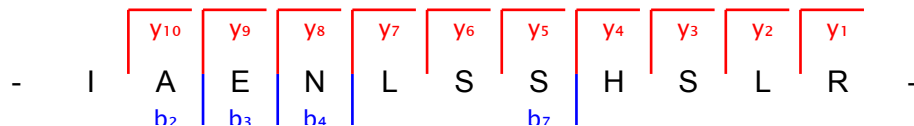

Raw file

20140918\_fract15\_dyn\_5ul\_E7\_01\_383

Scan

11143

Method

TOF; CID

Score

92.61

m/z

413.89

Gene names

BNIP3

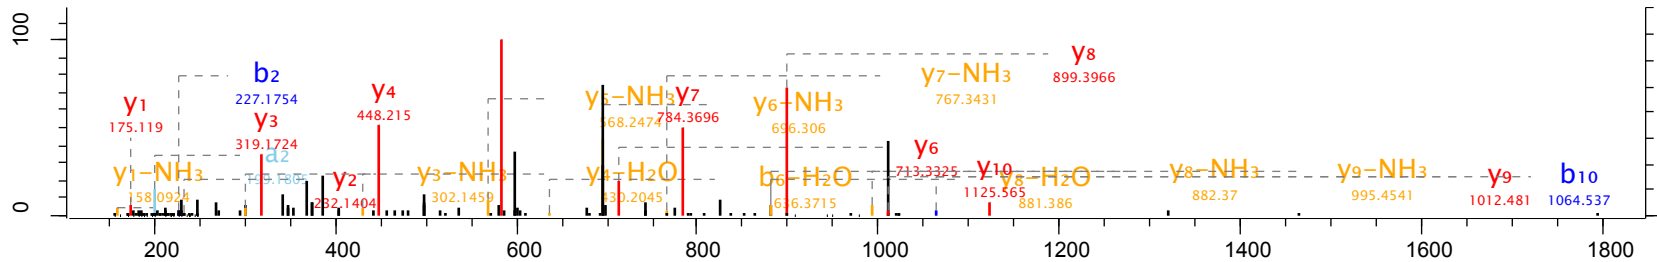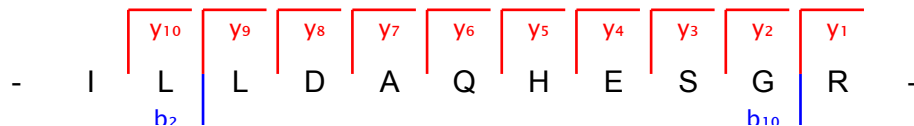

Raw file

Scan

Method

Score

m/z

Gene names

20140918\_fract15\_dyn\_5ul\_E7\_01\_383

13650

TOF; CID

50.35

411.87

FBP1;FBP2

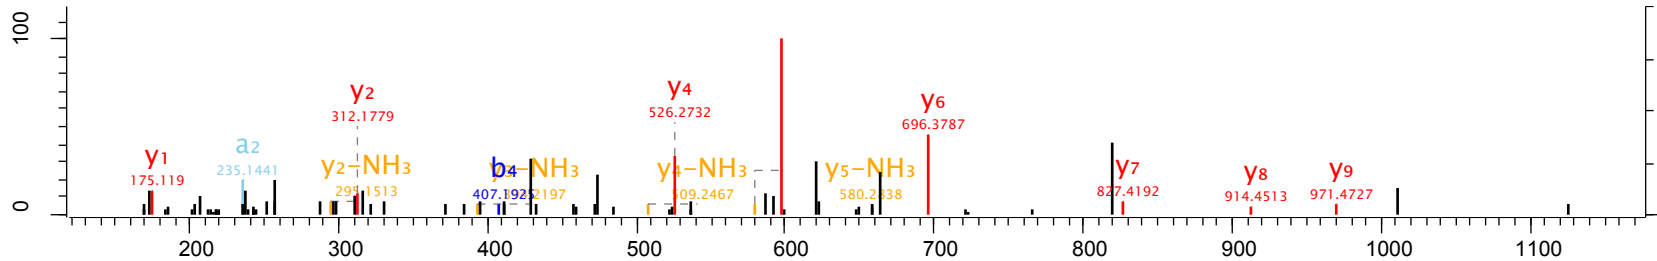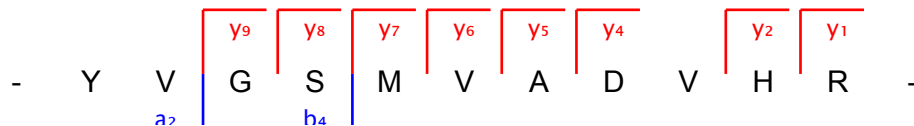

Raw file

20140918\_fract15\_dyn\_5ul\_E7\_01\_383

Scan

14342

Method

TOF; CID

Score

128.59

m/z

817.93

Gene names

FRAT2

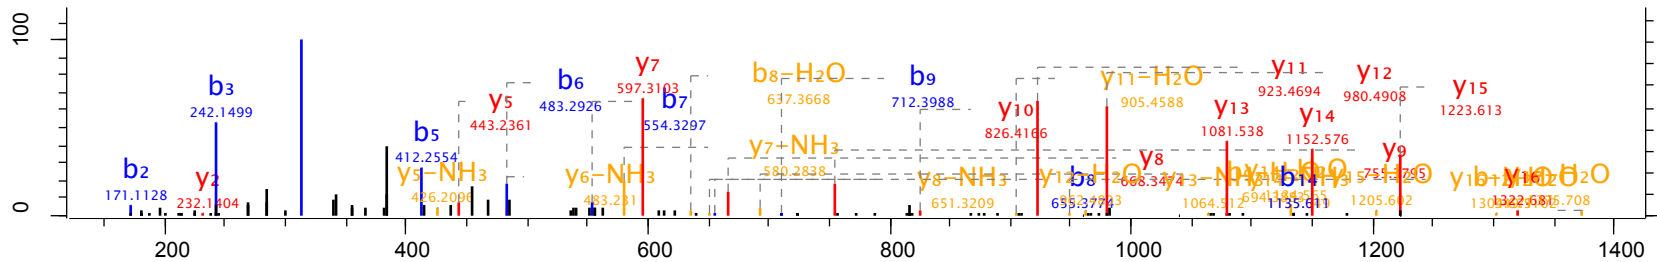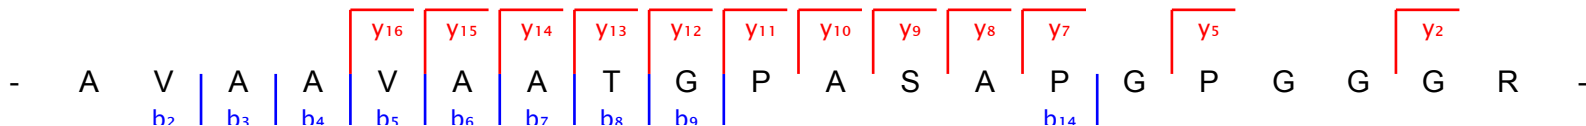

Raw file

20140918\_fract15\_dyn\_5ul\_E7\_01\_383

Scan

14478

Method

TOF; CID

Score

68.85

m/z

521.3

Gene names

CCDC17

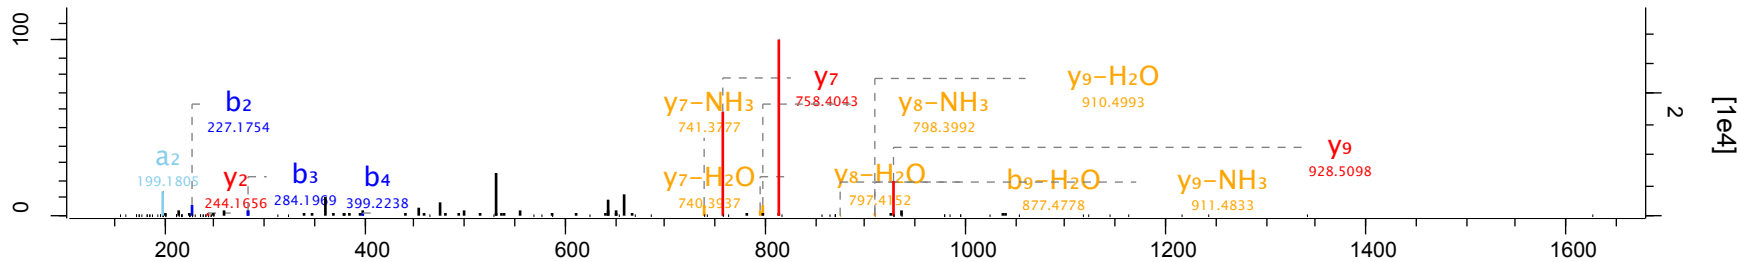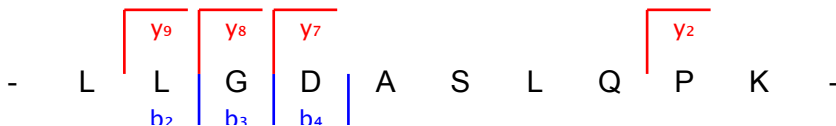

Raw file

20140918\_fract15\_dyn\_5ul\_E7\_01\_383

Scan

20484

Method

TOF; CID

Score

74.44

m/z

1043.03

Gene names

ZFP36

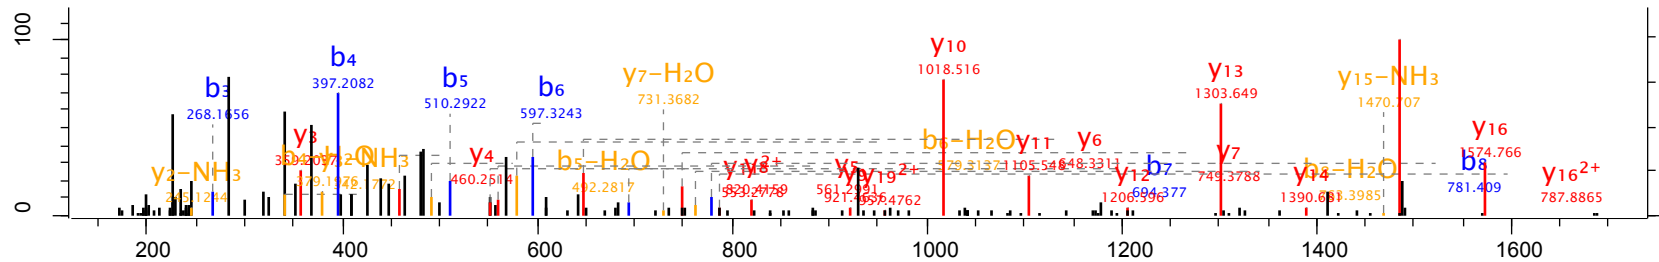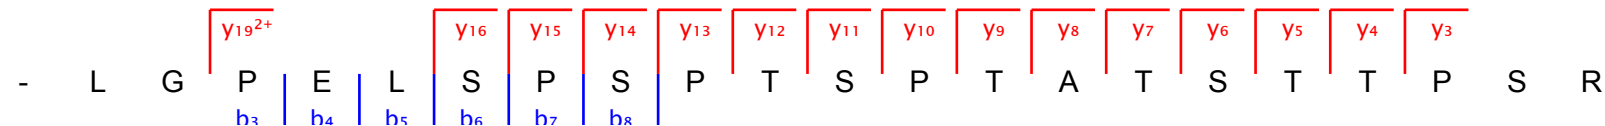



| Raw file                           | Scan  | Method   | Score  | m/z    | Gene names |
|------------------------------------|-------|----------|--------|--------|------------|
| 20140918_fract15_dyn_5ul_E7_01_383 | 20885 | TOF; CID | 124.59 | 401.24 | CDO1       |

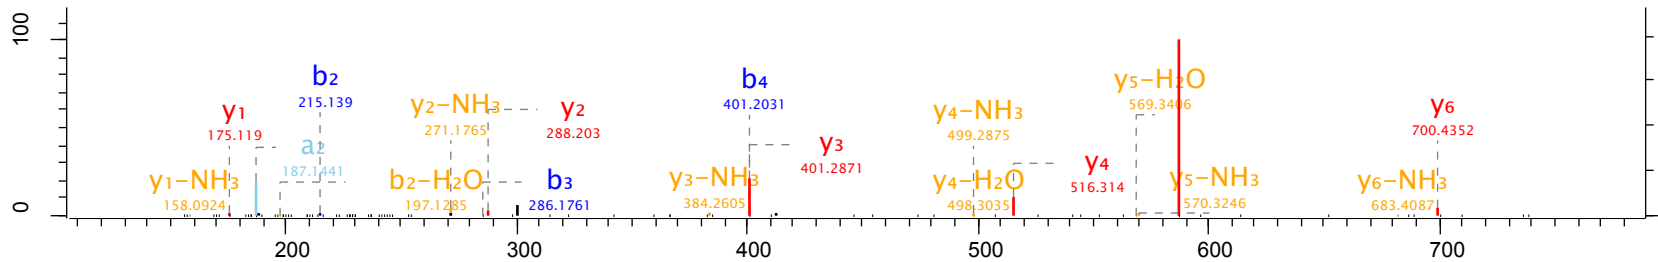

[1e5]

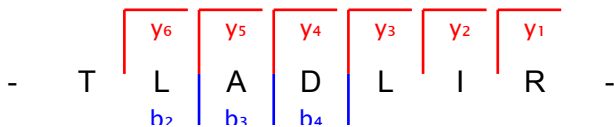

Raw file

20140918\_fract15\_dyn\_5ul\_E7\_01\_383

Scan

21284

Method

TOF; CID

Score

37.88

m/z

672.34

Gene names

TMEM243

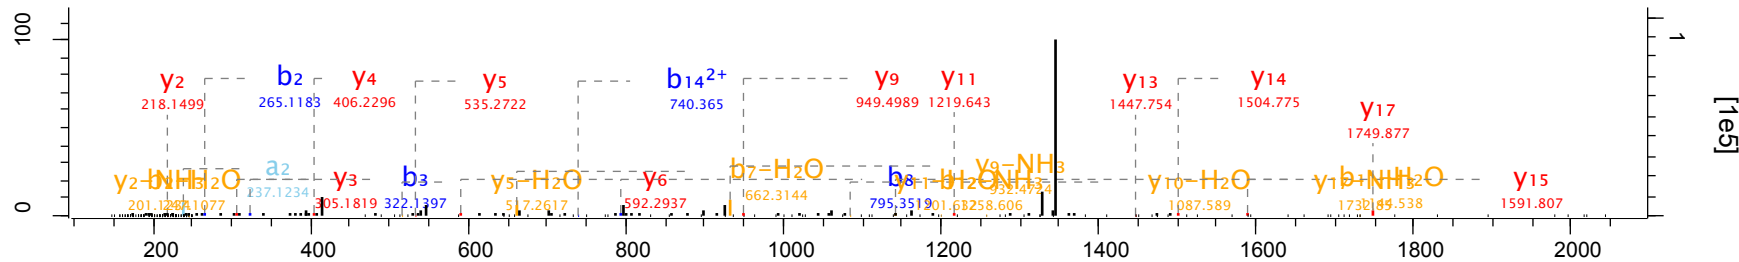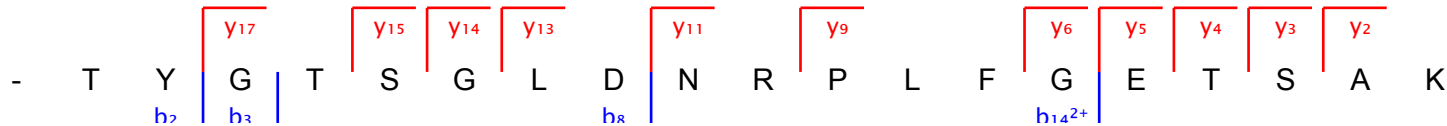

| Raw file                           | Scan  | Method   | Score  | m/z    | Gene names |
|------------------------------------|-------|----------|--------|--------|------------|
| 20140918_fract15_dyn_5ul_E7_01_383 | 21517 | TOF; CID | 118.67 | 524.28 | COX7C      |

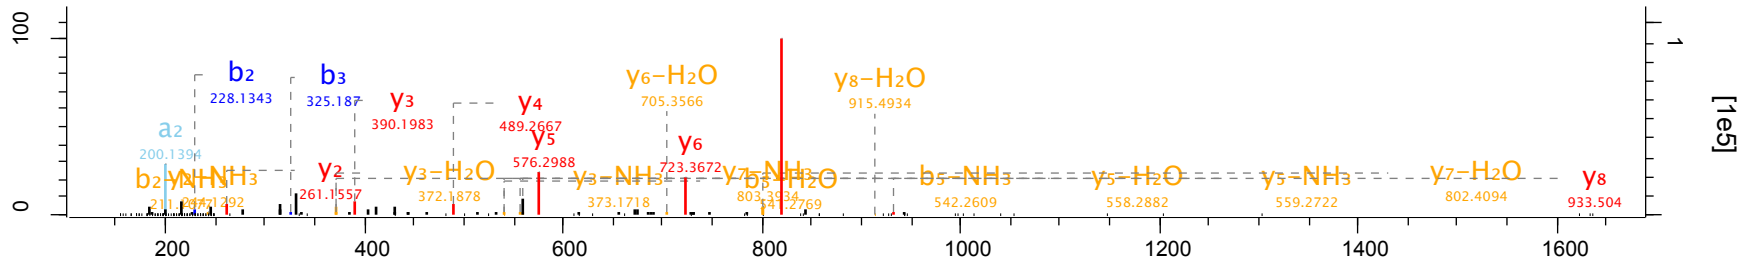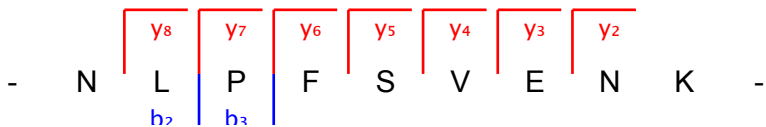

| Raw file                           | Scan  | Method   | Score | m/z    | Gene names |
|------------------------------------|-------|----------|-------|--------|------------|
| 20140918_fract15_dyn_5ul_E7_01_383 | 28146 | TOF; CID | 66.06 | 629.85 | C10orf90   |

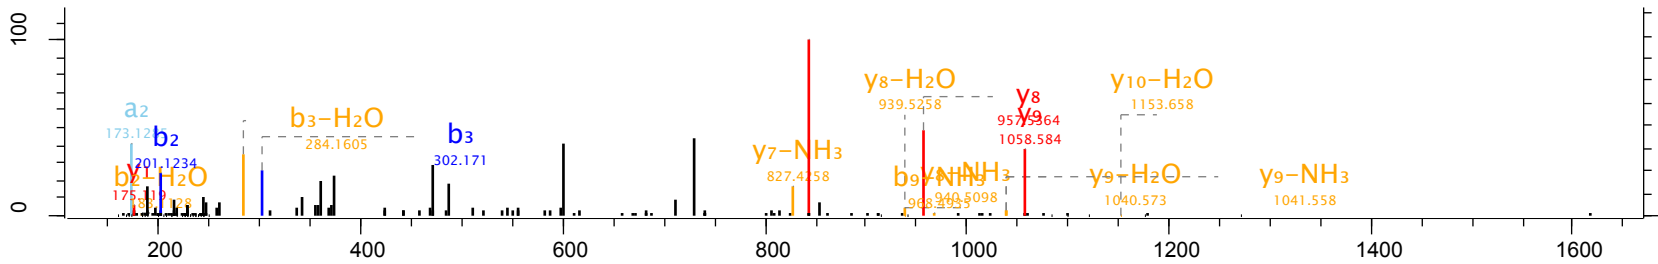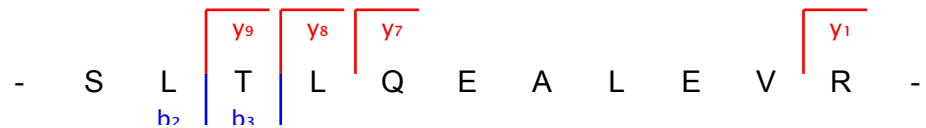

Raw file

20140918\_fract15\_dyn\_5ul\_E7\_01\_383

Scan

35442

Method

TOF; CID

Score

179.74

m/z

935.51

Gene names

VAMP1

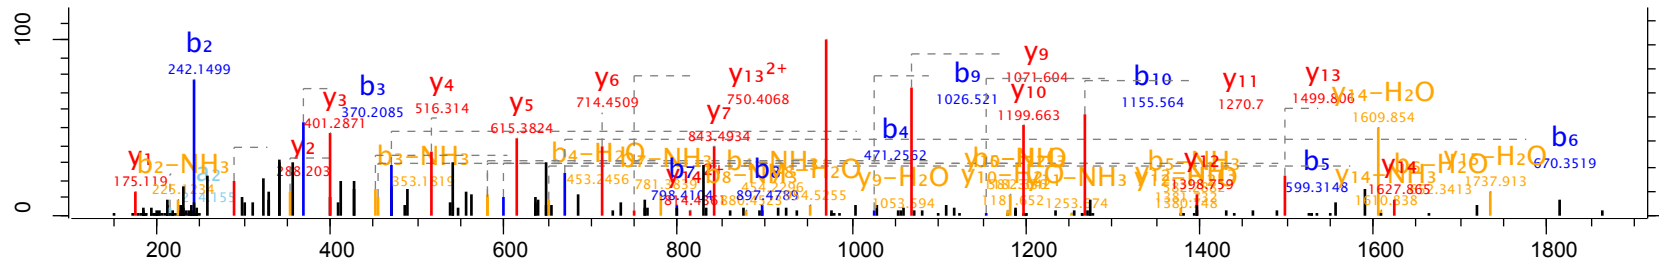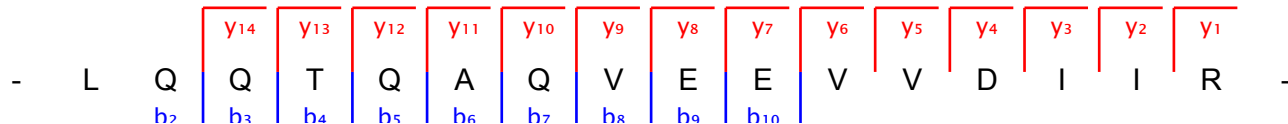

| Raw file                           | Scan  | Method   | Score  | m/z    | Gene names |
|------------------------------------|-------|----------|--------|--------|------------|
| 20140918_fract15_dyn_5ul_E7_01_383 | 36900 | TOF; CID | 125.74 | 615.86 | ORAOV1     |

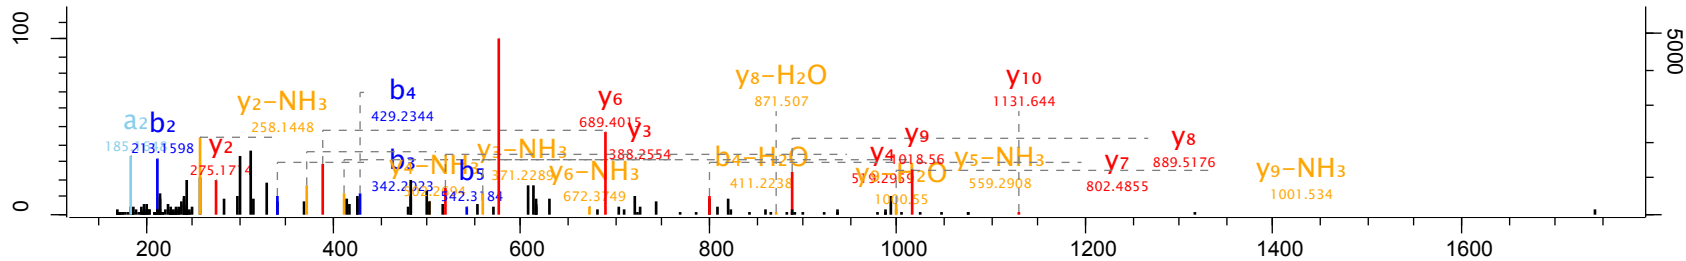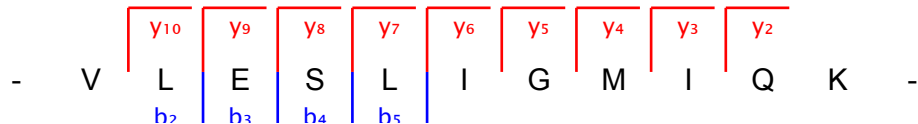

Raw file

20140918\_fract15\_dyn\_5ul\_E7\_01\_383

Scan

37782

Method

TOF; CID

Score

85.99

m/z

908.43

Gene names

EPT1

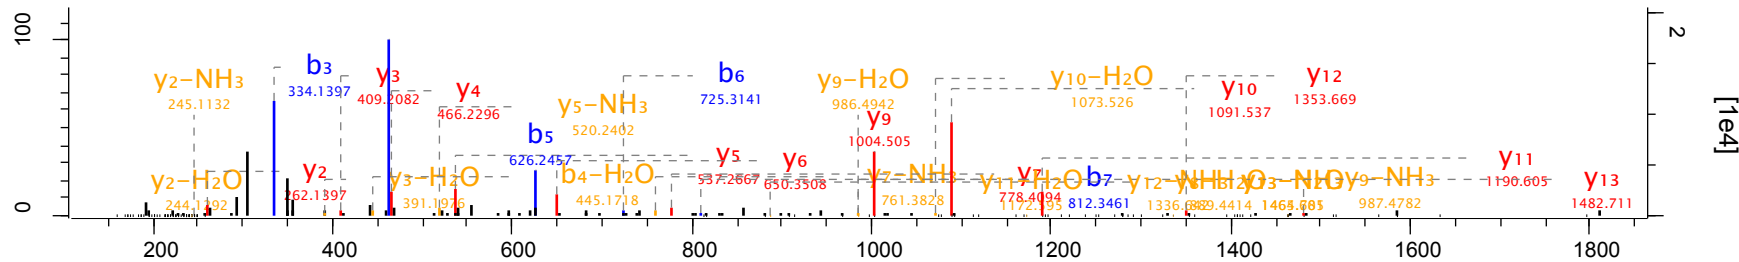

ac

-

A

G

Y

E

Y

V

S

P

E

Q

L

A

G

F

D

K

-

y<sub>13</sub>y<sub>12</sub>y<sub>11</sub>y<sub>10</sub>y<sub>9</sub>y<sub>7</sub>y<sub>6</sub>y<sub>5</sub>y<sub>4</sub>y<sub>3</sub>y<sub>2</sub>b<sub>3</sub>b<sub>4</sub>b<sub>5</sub>b<sub>6</sub>b<sub>7</sub>

[1e4]

2

| Raw file                           | Scan | Method   | Score | m/z    | Gene names |
|------------------------------------|------|----------|-------|--------|------------|
| 20140918_fract16_dyn_5ul_E8_01_384 | 7490 | TOF; CID | 67.65 | 551.28 | RCBTB1     |

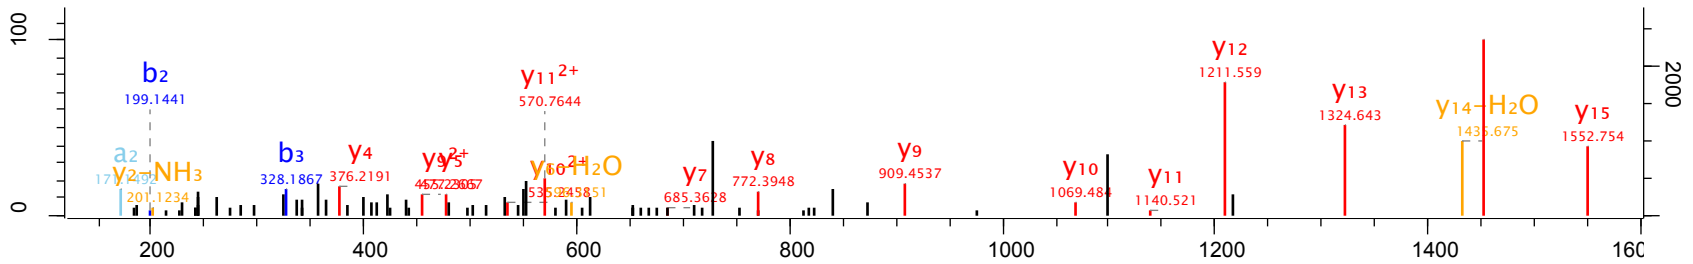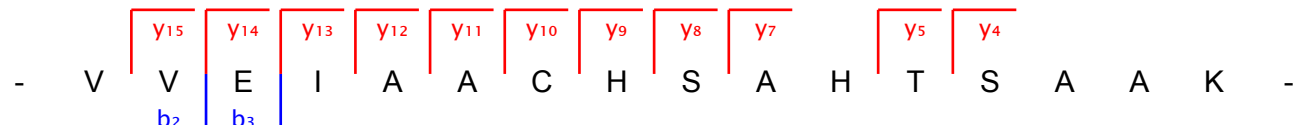



Raw file

20140918\_fract16\_dyn\_5ul\_E8\_01\_384

Scan

10407

Method

TOF; CID

Score

108.72

m/z

637.81

Gene names

FUNDC1

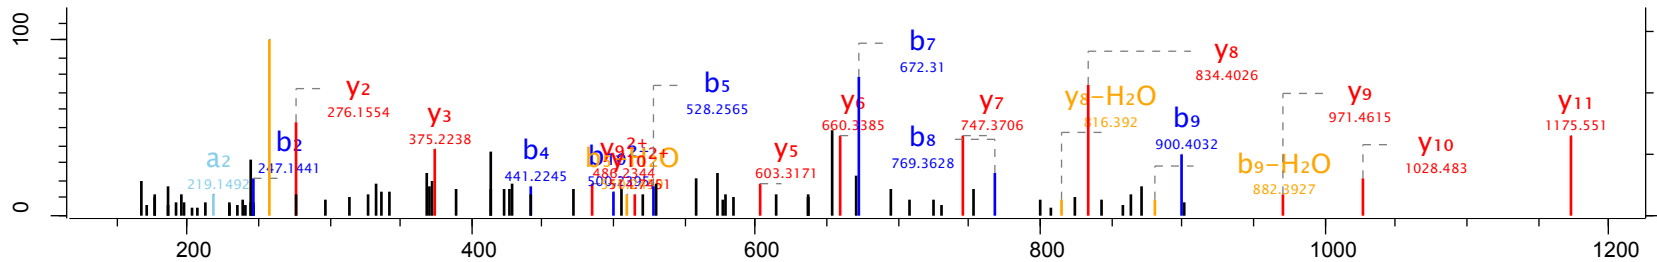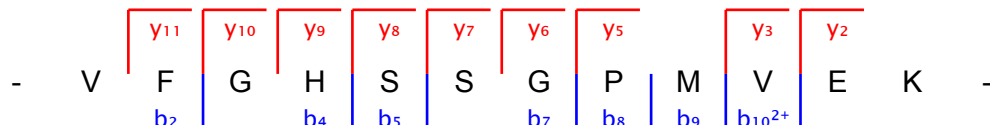

Raw file

20140918\_fract16\_dyn\_5ul\_E8\_01\_384

Scan

15801

Method

TOF; CID

Score

130.41

m/z

631.79

Gene names

CRLS1

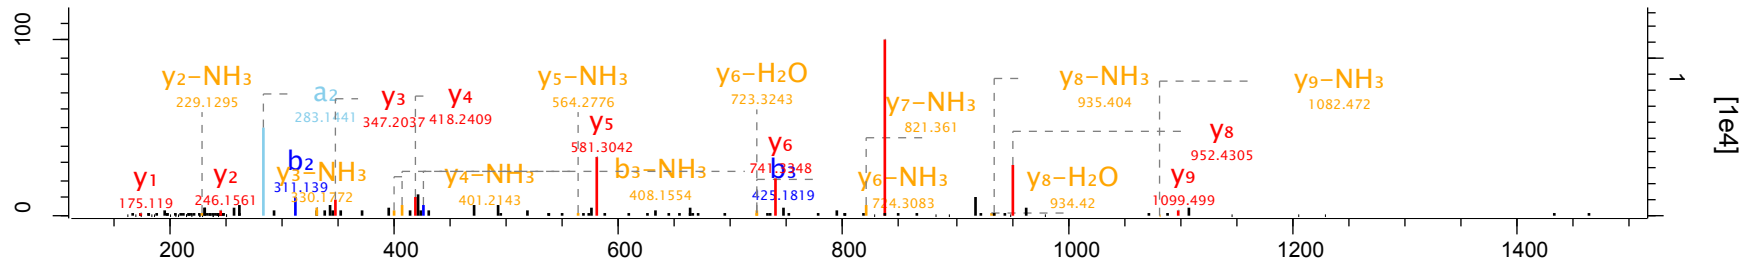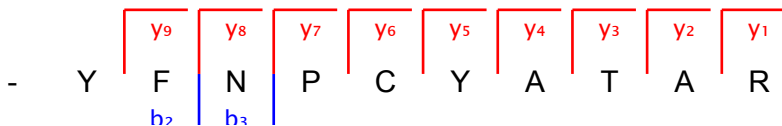

Raw file

20140918\_fract16\_dyn\_5ul\_E8\_01\_384

Scan

19188

Method

TOF; CID

Score

147.26

m/z

705.36

Gene names

TMEM69

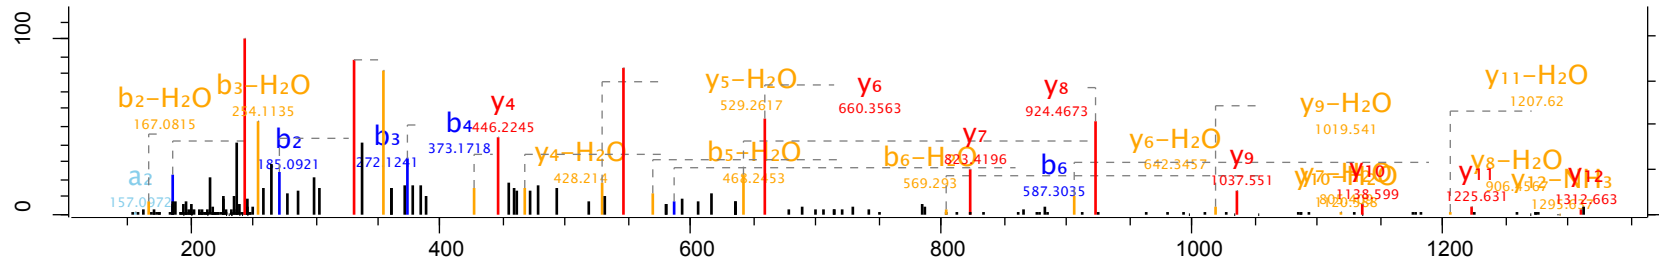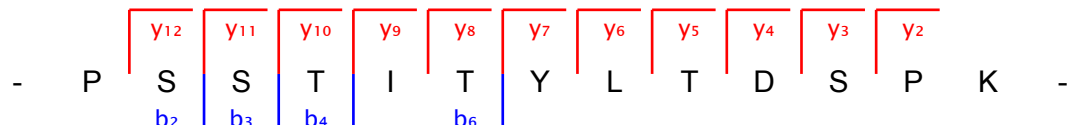

Raw file

20140918\_fract16\_dyn\_5ul\_E8\_01\_384

Scan

20600

Method

TOF; CID

Score

122.69

m/z

643.3

Gene names

TC2N

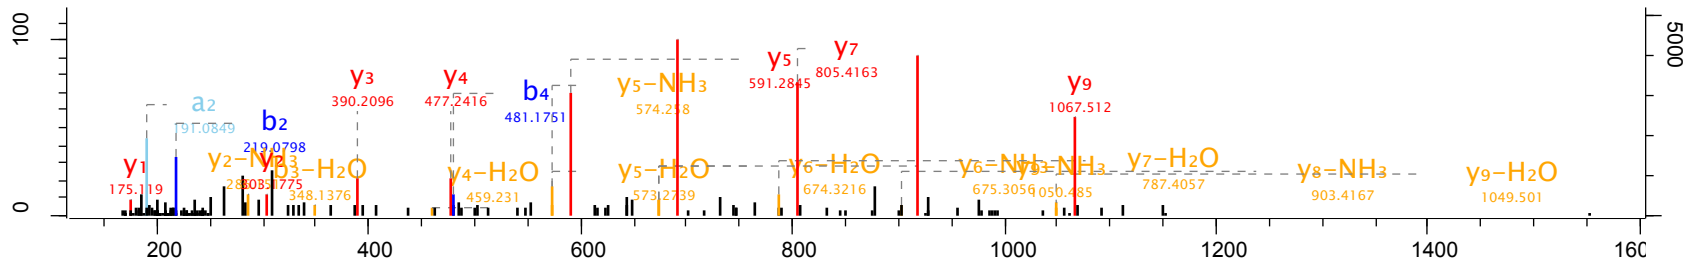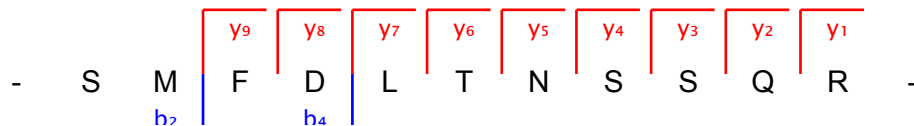

| Raw file                           | Scan  | Method   | Score | m/z    | Gene names |
|------------------------------------|-------|----------|-------|--------|------------|
| 20140918_fract16_dyn_5ul_E8_01_384 | 21868 | TOF; CID | 99.82 | 517.78 | TMEM18     |

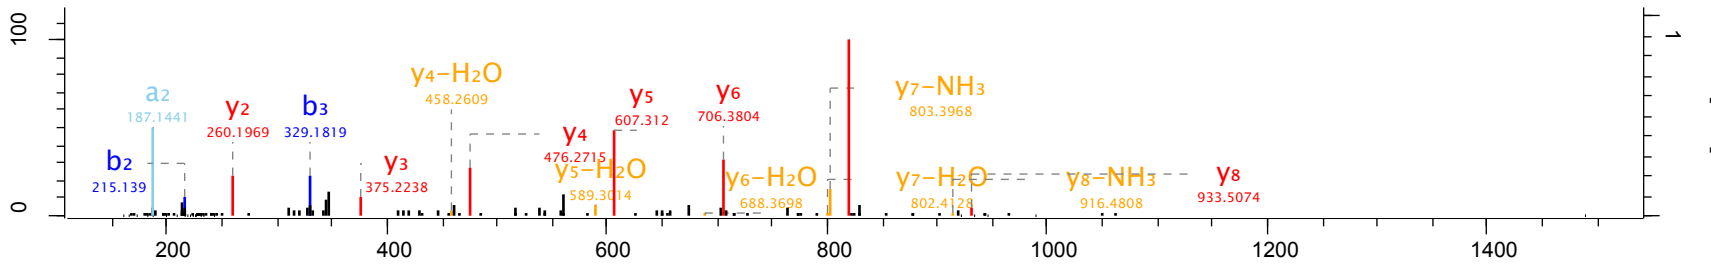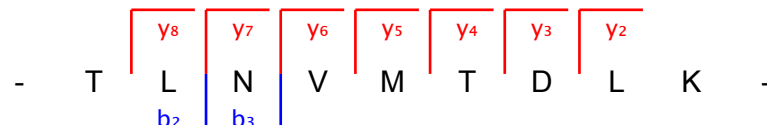

| Raw file                           | Scan  | Method   | Score | m/z    | Gene names |
|------------------------------------|-------|----------|-------|--------|------------|
| 20140918_fract16_dyn_5ul_E8_01_384 | 23783 | TOF; CID | 85.94 | 919.96 | TMEM184A   |

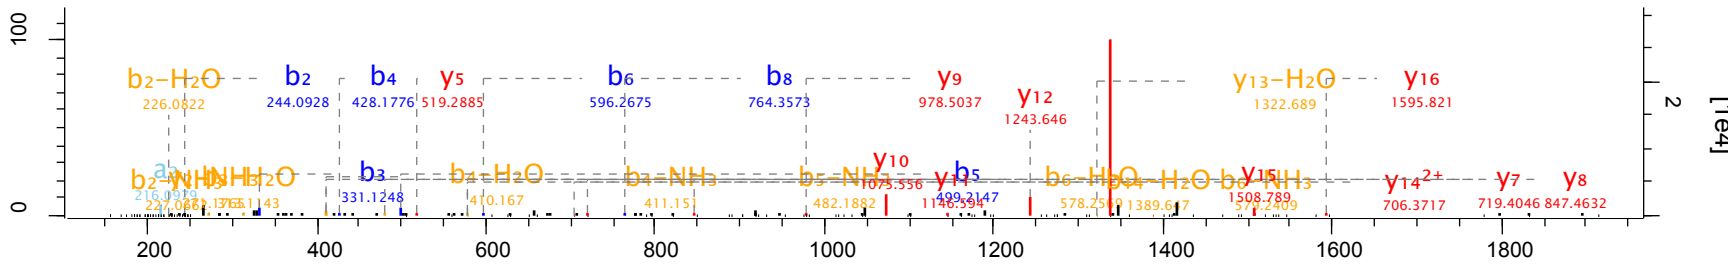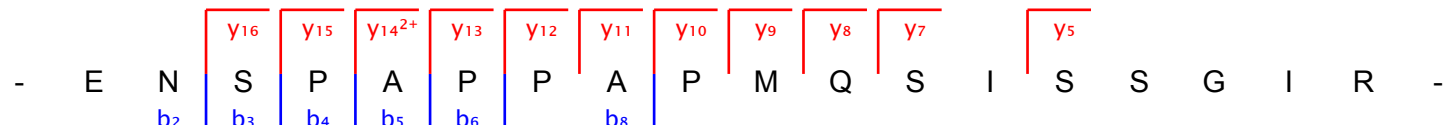

Raw file

20140918\_fract16\_dyn\_5ul\_E8\_01\_384

Scan

25775

Method

TOF; CID

Score

74.96

m/z

648.83

Gene names

GSKIP

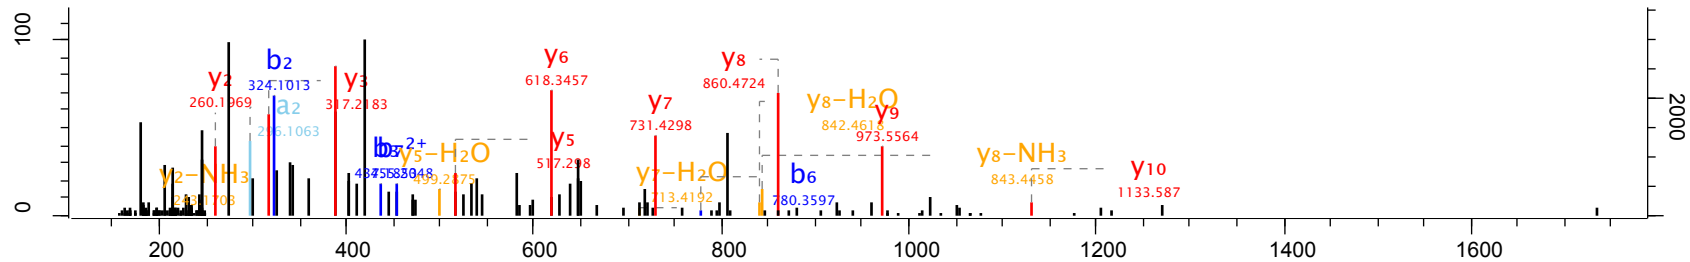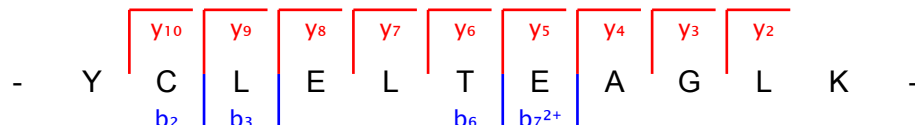

| Raw file                           | Scan  | Method   | Score | m/z    | Gene names |
|------------------------------------|-------|----------|-------|--------|------------|
| 20140918_fract16_dyn_5ul_E8_01_384 | 32586 | TOF; CID | 70.26 | 851.43 | GTF3C6     |

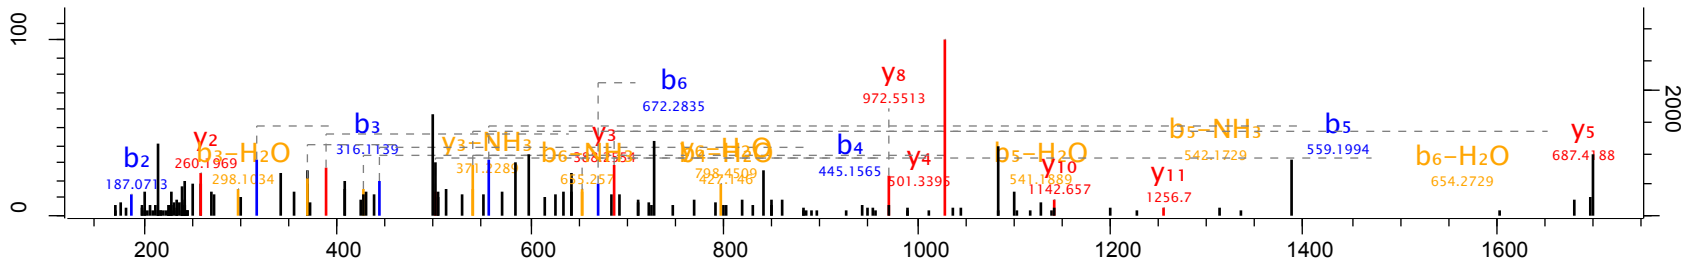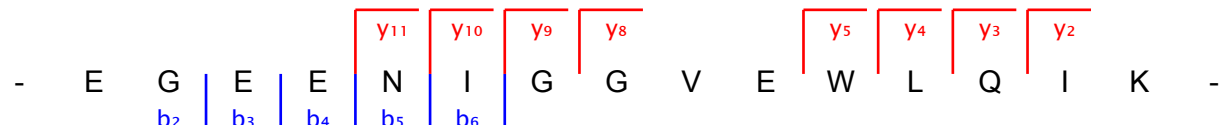



| Raw file                           | Scan  | Method   | Score  | m/z | Gene names |
|------------------------------------|-------|----------|--------|-----|------------|
| 20140918_fract16_dyn_5ul_E8_01_384 | 36809 | TOF; CID | 225.13 | 664 | ABRACL     |

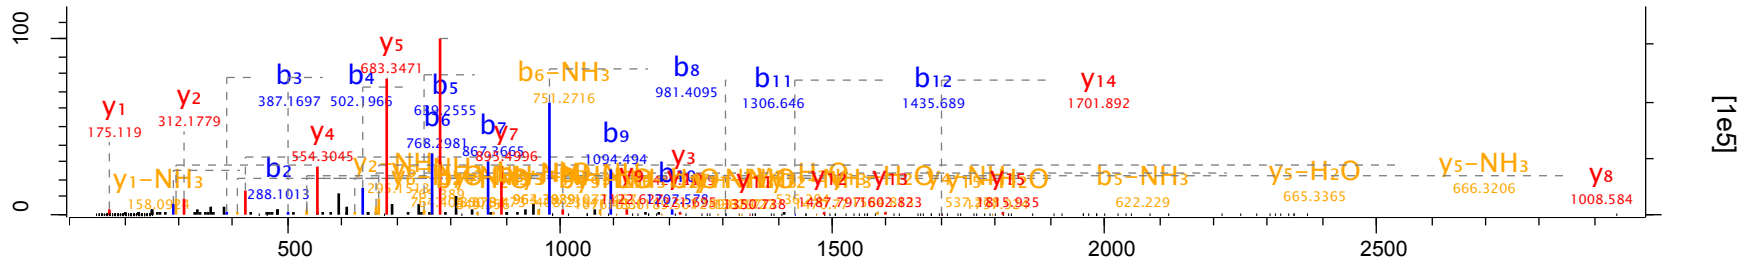

ac

- M N V D H E V N L L V E E I H R -

b<sub>2</sub> b<sub>3</sub> b<sub>4</sub> b<sub>5</sub> b<sub>6</sub> b<sub>7</sub> b<sub>8</sub> b<sub>9</sub> b<sub>10</sub> b<sub>11</sub> b<sub>12</sub>

y<sub>15</sub> y<sub>14</sub> y<sub>13</sub> y<sub>12</sub> y<sub>11</sub> y<sub>10</sub> y<sub>9</sub> y<sub>8</sub> y<sub>7</sub> y<sub>6</sub> y<sub>5</sub> y<sub>4</sub> y<sub>3</sub> y<sub>2</sub> y<sub>1</sub>

| Raw file                           | Scan  | Method   | Score  | m/z    | Gene names |
|------------------------------------|-------|----------|--------|--------|------------|
| 20140918_fract17_dyn_5ul_F1_01_385 | 11497 | TOF; CID | 166.04 | 485.91 | SELT       |

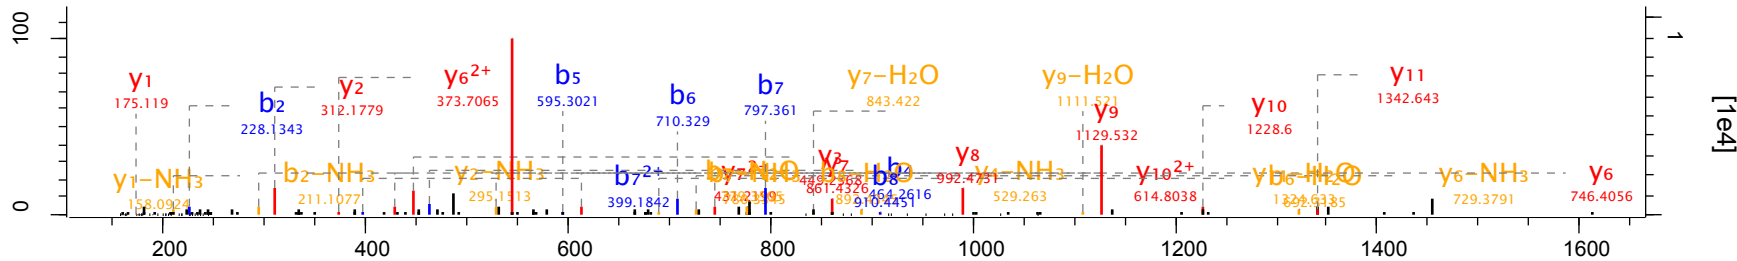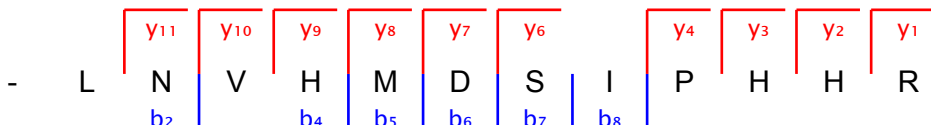

| Raw file                           | Scan  | Method   | Score | m/z    | Gene names |
|------------------------------------|-------|----------|-------|--------|------------|
| 20140918_fract17_dyn_5ul_F1_01_385 | 13023 | TOF; CID | 53.3  | 512.62 | PNMA1      |

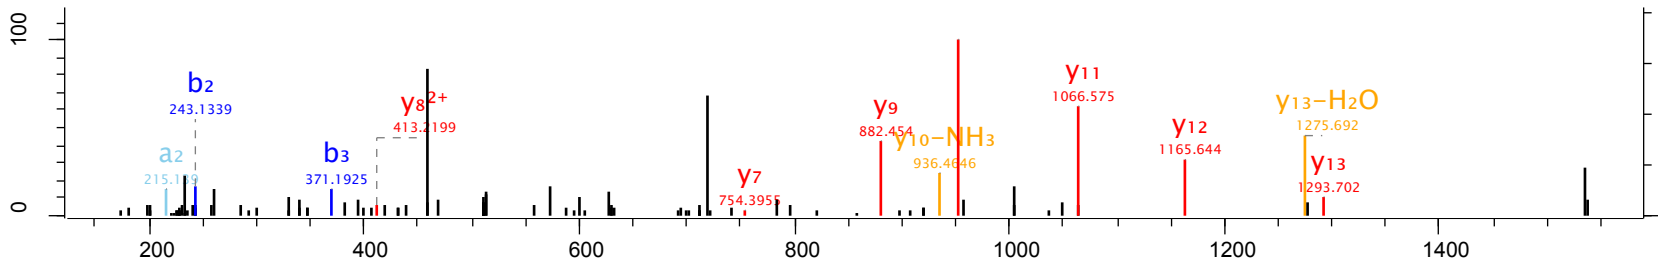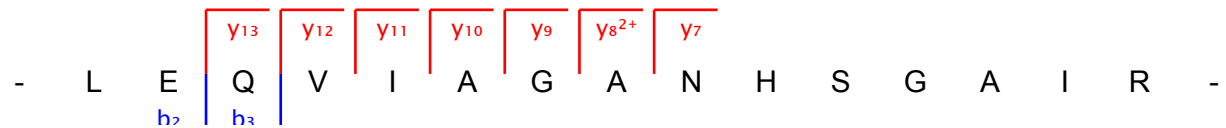

Raw file

20140918\_fract17\_dyn\_5ul\_F1\_01\_385

Scan

19598

Method

TOF; CID

Score

71.45

m/z

576.32

Gene names

ADAM12

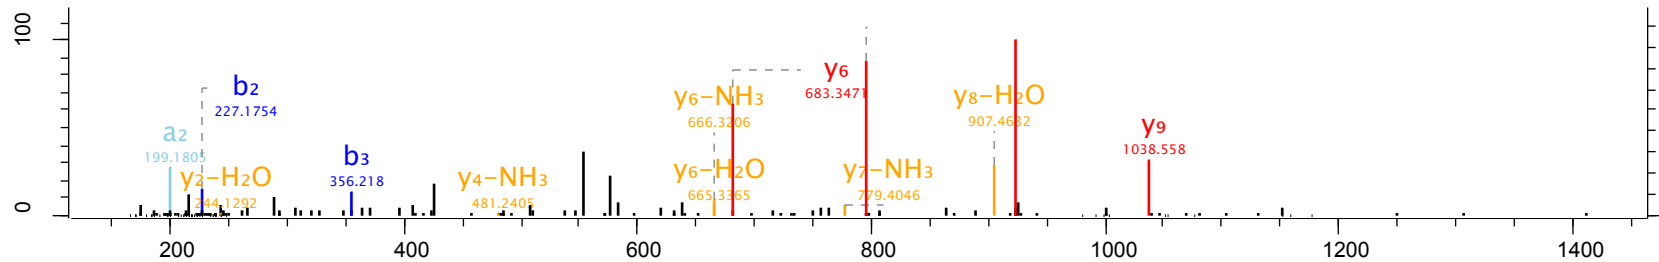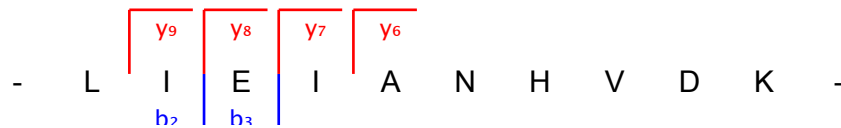

Raw file

20140918\_fract17\_dyn\_5ul\_F1\_01\_385

Scan

20317

Method

TOF; CID

Score

34.51

m/z

813.9

Gene names

BAD

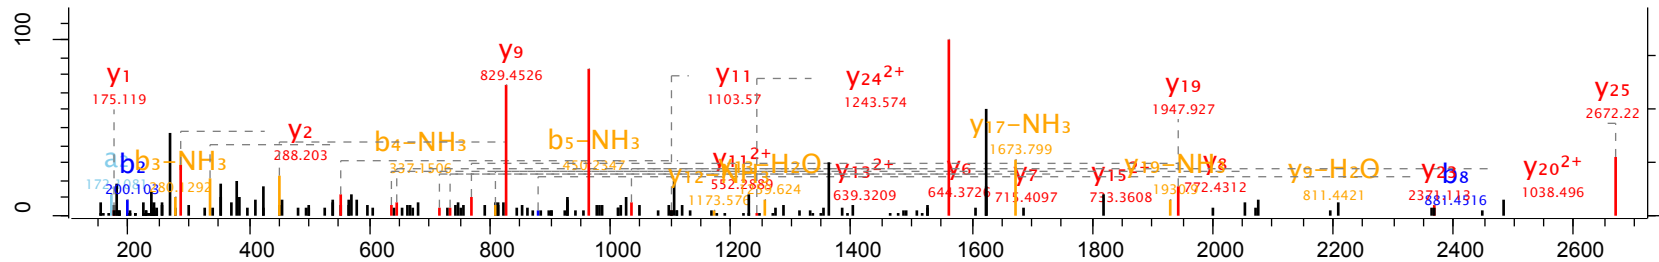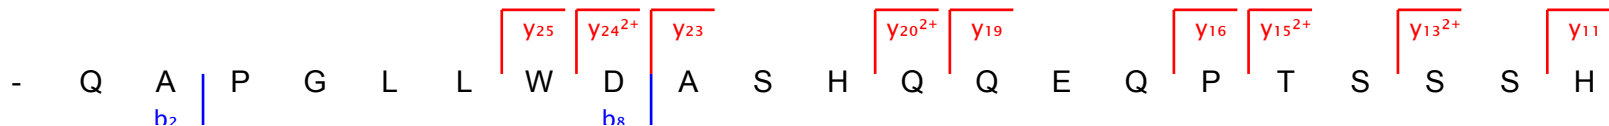

Raw file

20140918\_fract17\_dyn\_5ul\_F1\_01\_385

Scan

20475

Method

TOF; CID

Score

68.58

m/z

563.64

Gene names

ELF4

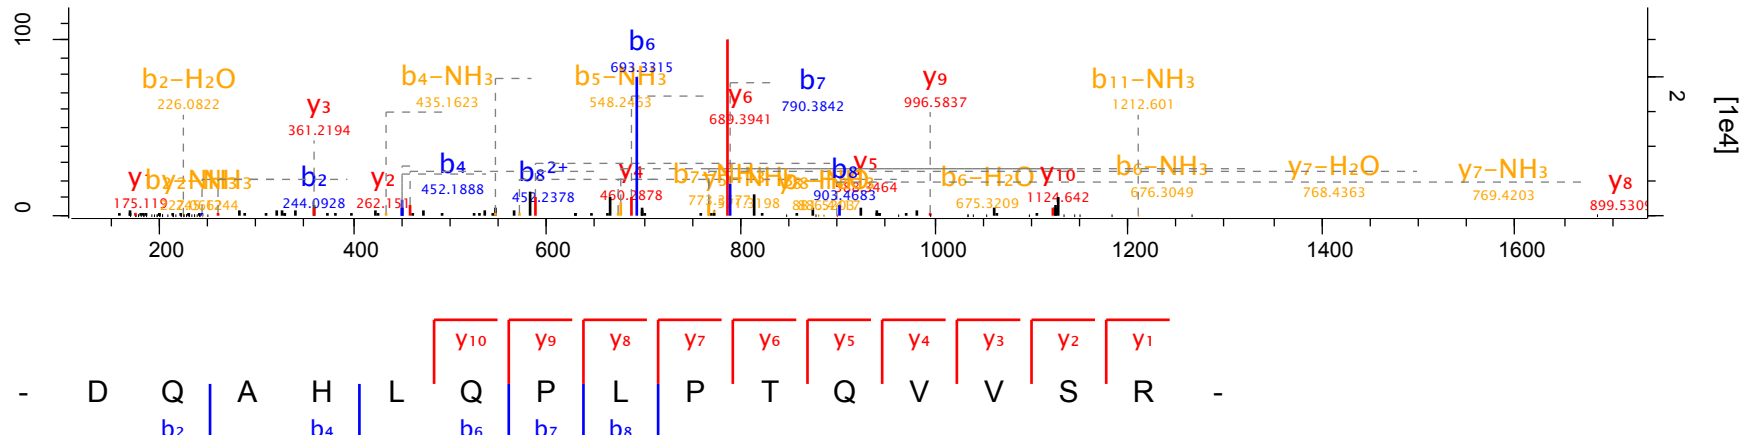

Raw file

20140918\_fract17\_dyn\_5ul\_F1\_01\_385

Scan

20713

Method

TOF; CID

Score

87.45

m/z

834.92

Gene names

SRF

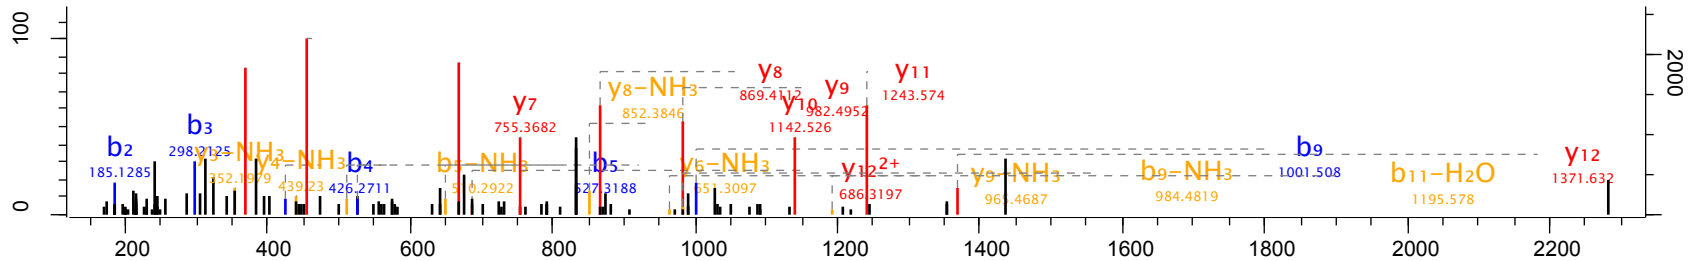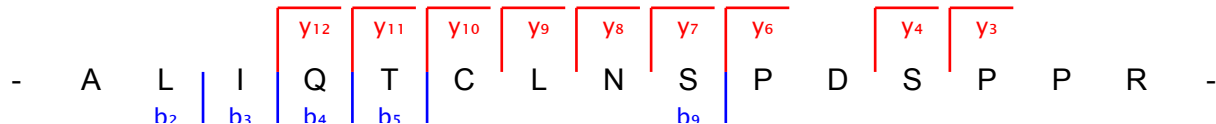

| Raw file                           | Scan  | Method   | Score  | m/z    | Gene names |
|------------------------------------|-------|----------|--------|--------|------------|
| 20140918_fract17_dyn_5ul_F1_01_385 | 21011 | TOF; CID | 107.06 | 574.31 | C18orf25   |

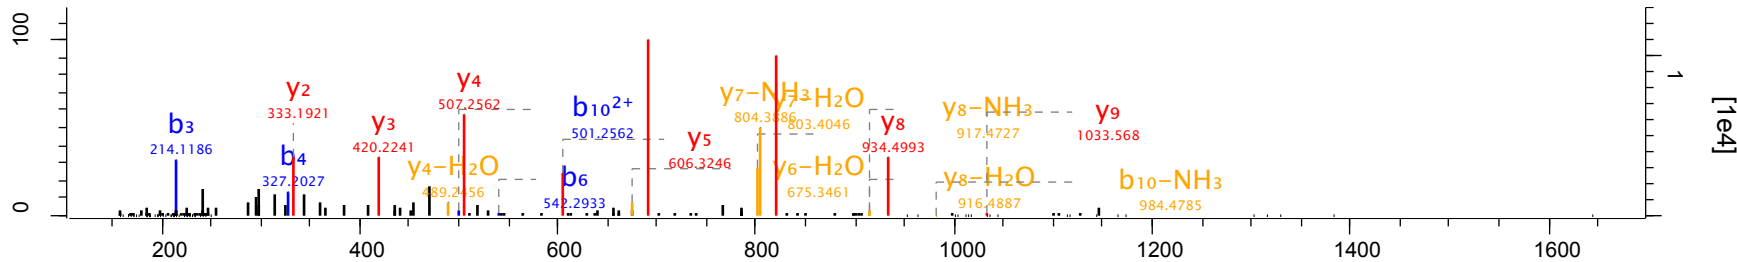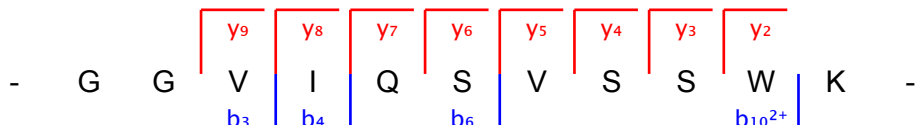



| Raw file                           | Scan  | Method   | Score | m/z    | Gene names |
|------------------------------------|-------|----------|-------|--------|------------|
| 20140918_fract17_dyn_5ul_F1_01_385 | 21637 | TOF; CID | 76.33 | 637.84 | FICD       |

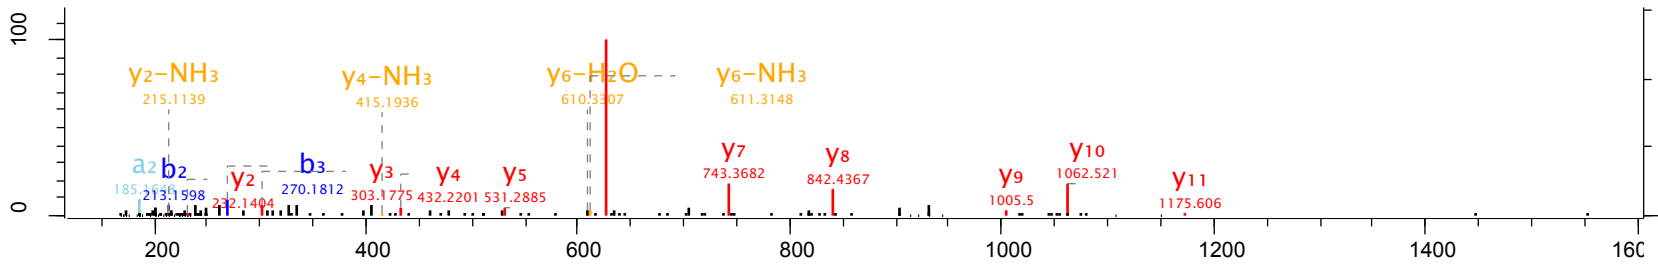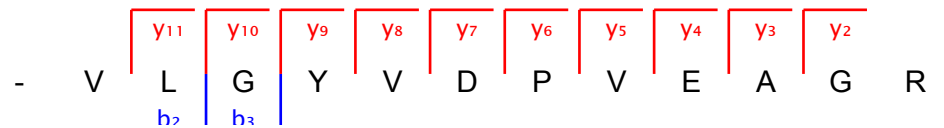

[1e4]

| Raw file                           | Scan  | Method   | Score | m/z    | Gene names |
|------------------------------------|-------|----------|-------|--------|------------|
| 20140918_fract17_dyn_5ul_F1_01_385 | 23864 | TOF; CID | 83.36 | 518.28 | LSM10      |

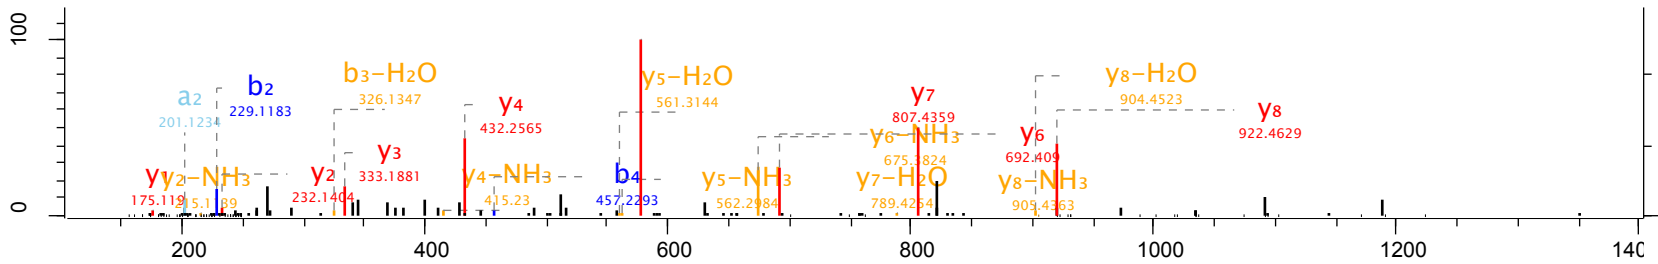

[1e4]

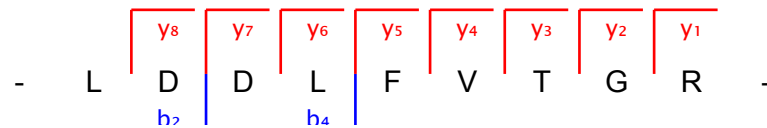

Raw file

20140918\_fract17\_dyn\_5ul\_F1\_01\_385

Scan

23963

Method

TOF; CID

Score

86.95

m/z

813.07

Gene names

LHFPL2

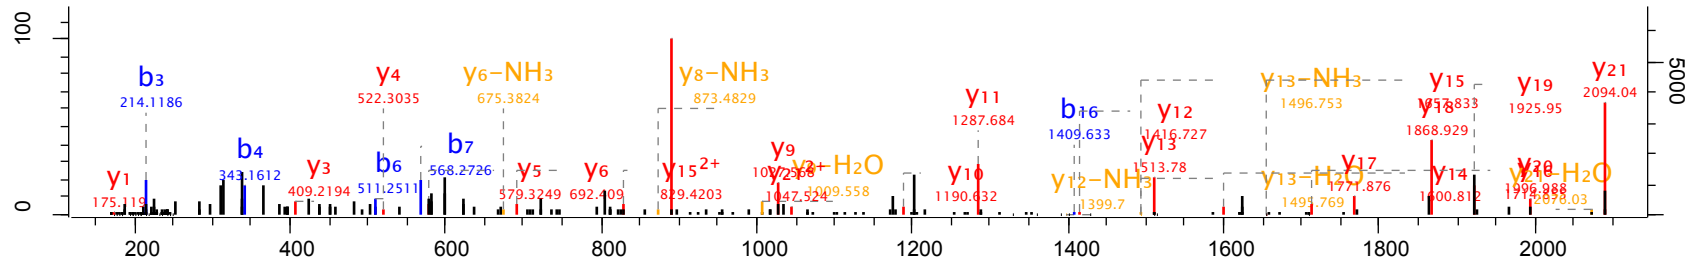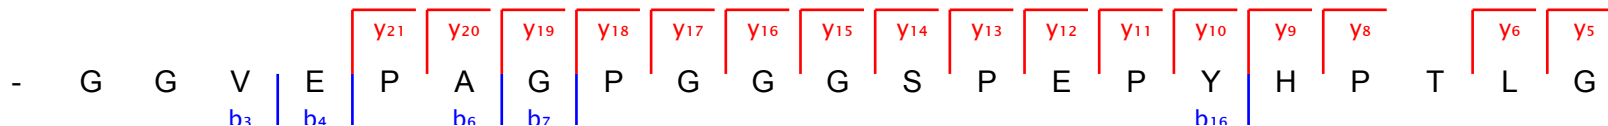

| Raw file                           | Scan  | Method   | Score | m/z    | Gene names |
|------------------------------------|-------|----------|-------|--------|------------|
| 20140918_fract17_dyn_5ul_F1_01_385 | 24002 | TOF; CID | 73.44 | 587.82 | SYNGR3     |

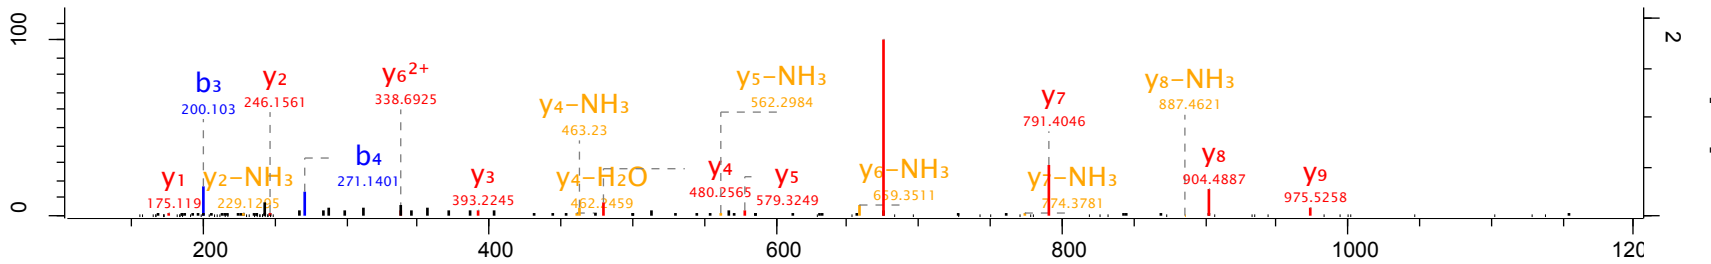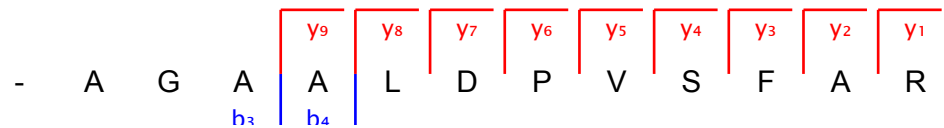

Raw file

20140918\_fract17\_dyn\_5ul\_F1\_01\_385

Scan

24990

Method

TOF; CID

Score

93.65

m/z

502.27

Gene names

PGM5

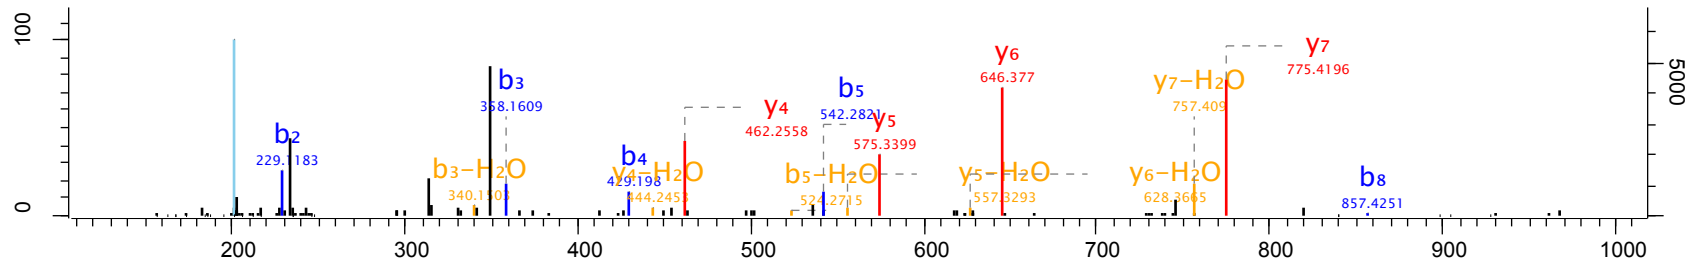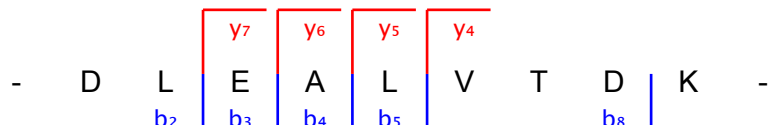

| Raw file                           | Scan  | Method   | Score | m/z    | Gene names |
|------------------------------------|-------|----------|-------|--------|------------|
| 20140918_fract17_dyn_5ul_F1_01_385 | 25591 | TOF; CID | 89.75 | 415.75 | APBA1      |

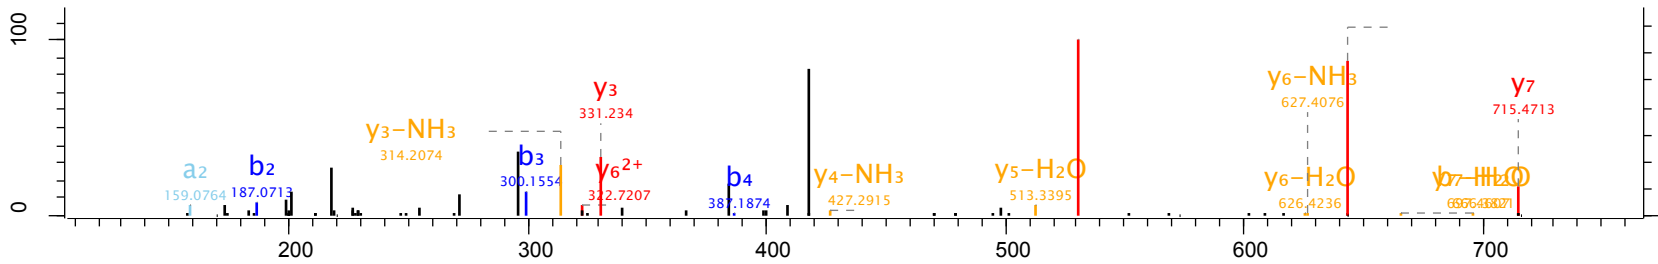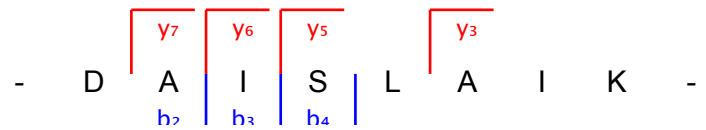

| Raw file                           | Scan  | Method   | Score | m/z    | Gene names |
|------------------------------------|-------|----------|-------|--------|------------|
| 20140918_fract17_dyn_5ul_F1_01_385 | 27872 | TOF; CID | 65.37 | 862.46 | PSENN      |

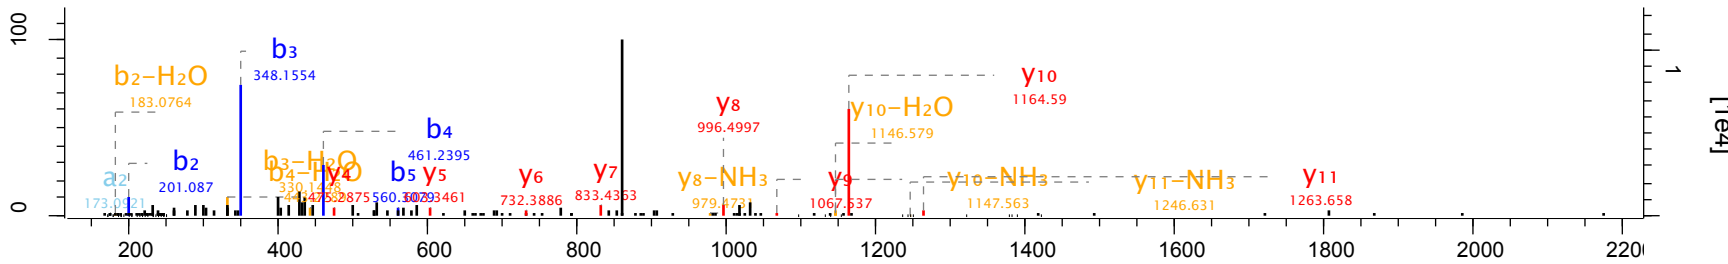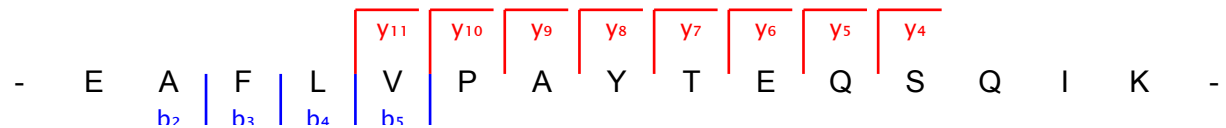

Raw file

20140918\_fract17\_dyn\_5ul\_F1\_01\_385

Scan

28637

Method

TOF; CID

Score

76.3

m/z

1074.52

Gene names

GGACT

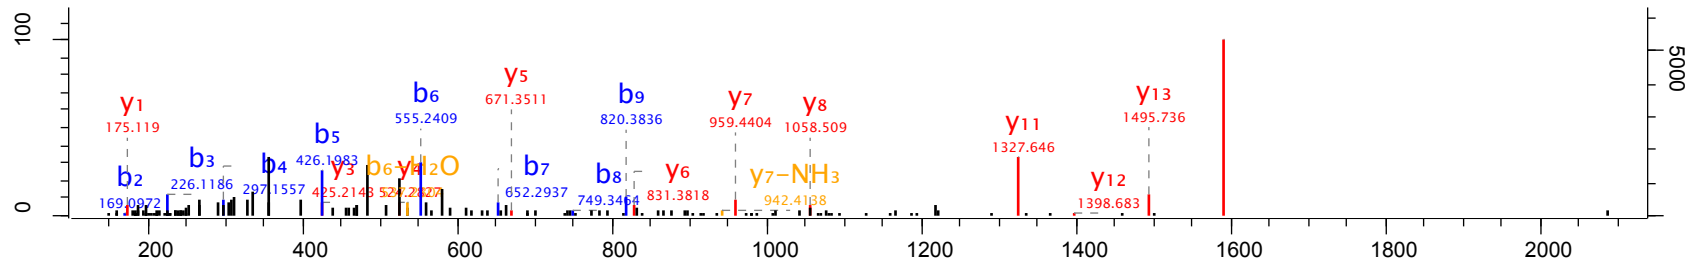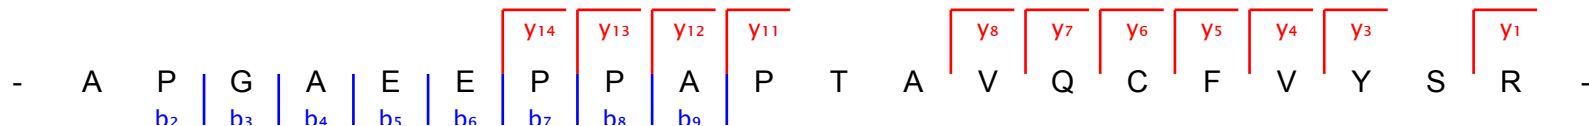



Raw file

20140918\_fract17\_dyn\_5ul\_F1\_01\_385

Scan

32221

Method

TOF; CID

Score

44.93

m/z

963.44

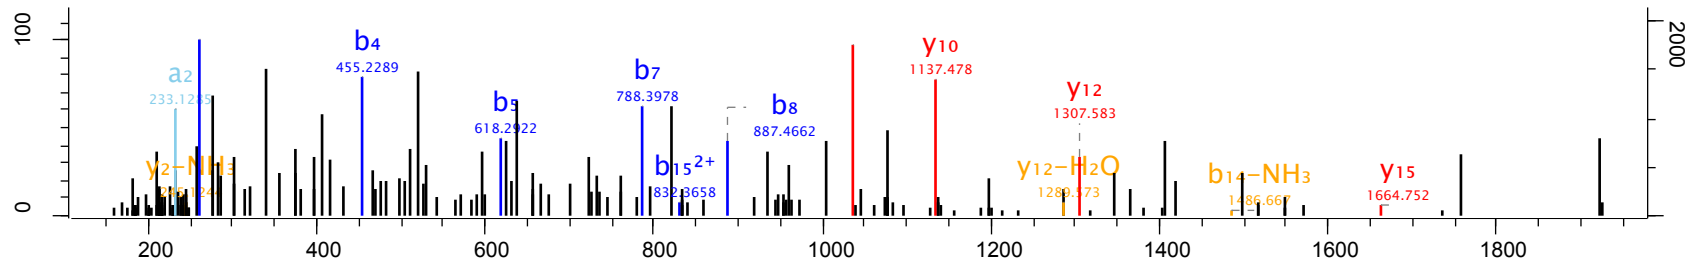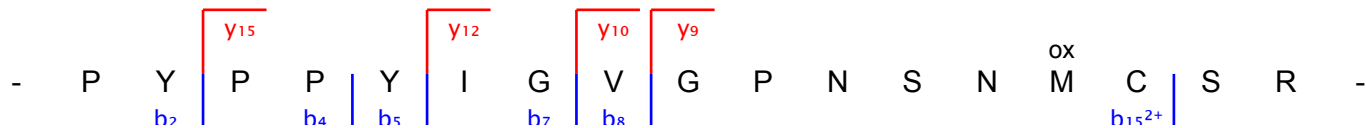

Raw file

20140918\_fract17\_dyn\_5ul\_F1\_01\_385

Scan

34561

Method

TOF; CID

Score

160.43

m/z

1007.98

Gene names

TMEM106C

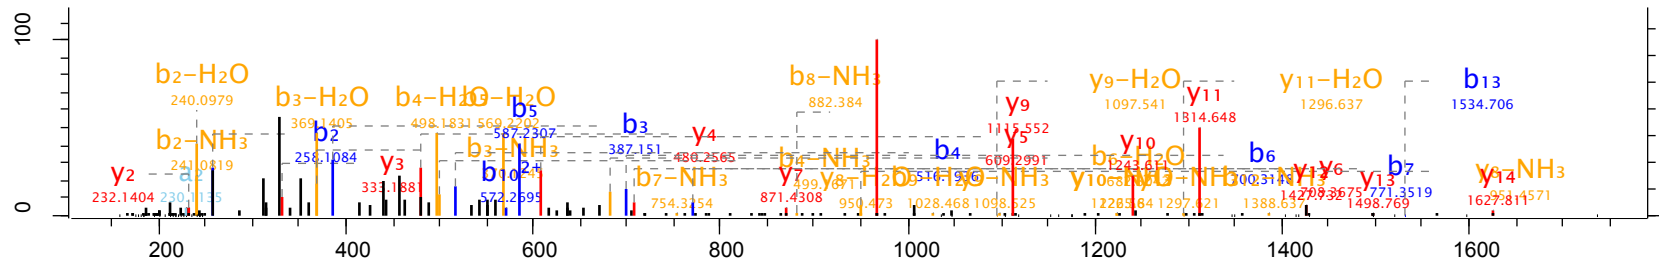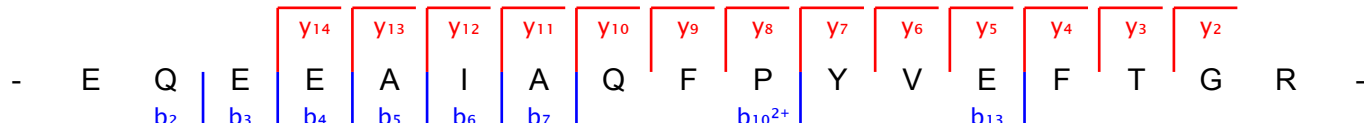

Raw file

Scan

Method

Score

m/z

Gene names

20140918\_fract18\_dyn\_5ul\_F2\_01\_386

9805

TOF; CID

91.96

457.24

ZFP62

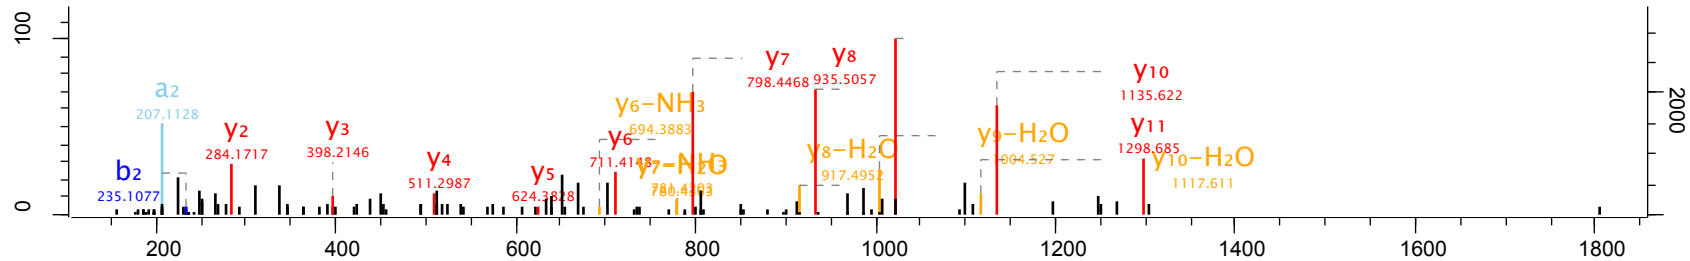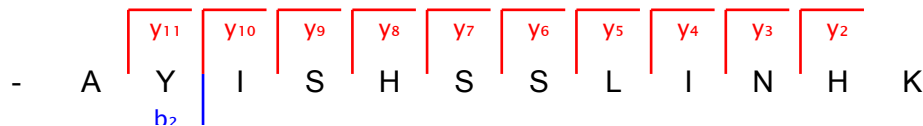

Raw file

20140918\_fract18\_dyn\_5ul\_F2\_01\_386

Scan

10641

Method

TOF; CID

Score

70.94

m/z

583.3

Gene names

PRDM15;ZNF298

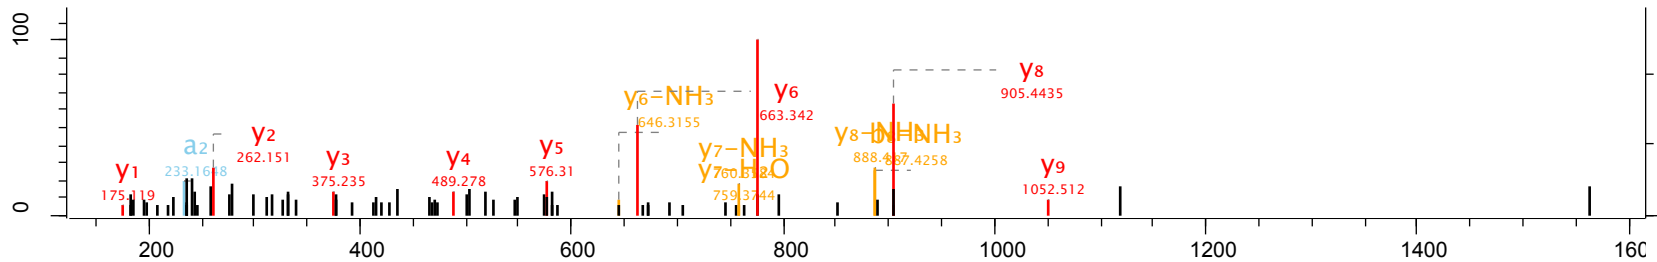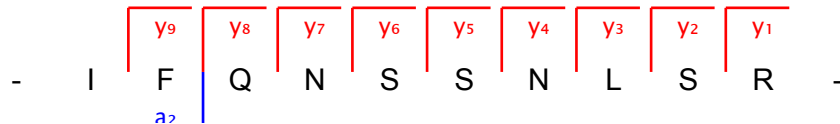

| Raw file                           | Scan  | Method   | Score  | m/z    | Gene names |
|------------------------------------|-------|----------|--------|--------|------------|
| 20140918_fract18_dyn_5ul_F2_01_386 | 12792 | TOF; CID | 120.65 | 407.24 | MYO1G      |

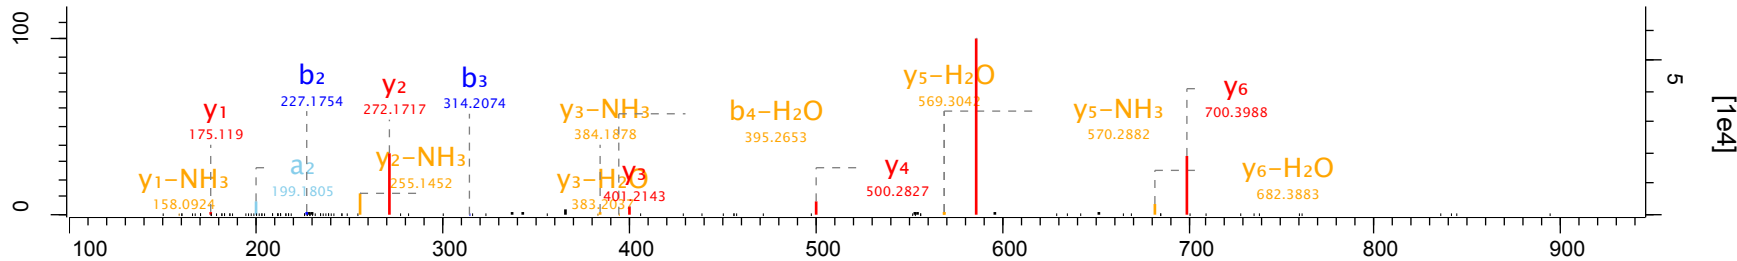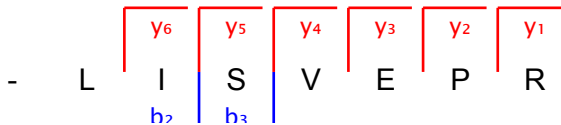

Raw file

20140918\_fract18\_dyn\_5ul\_F2\_01\_386

Scan

15134

Method

TOF; CID

Score

73.83

m/z

558.61

Gene names

BCL2L11

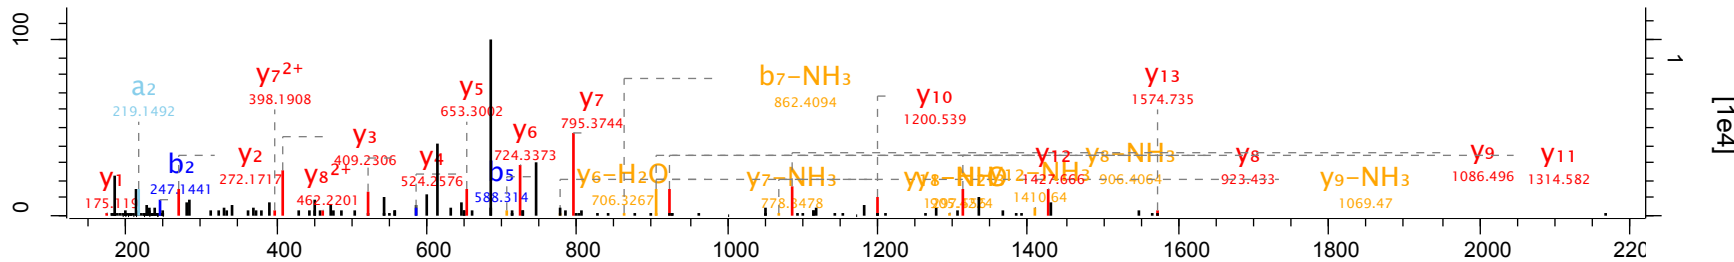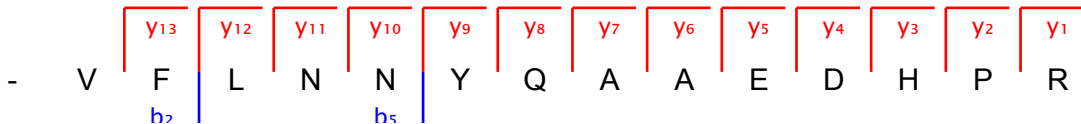

Raw file

20140918\_fract18\_dyn\_5ul\_F2\_01\_386

Scan

15567

Method

TOF; CID

Score

56.49

m/z

736.4

Gene names

TTC8

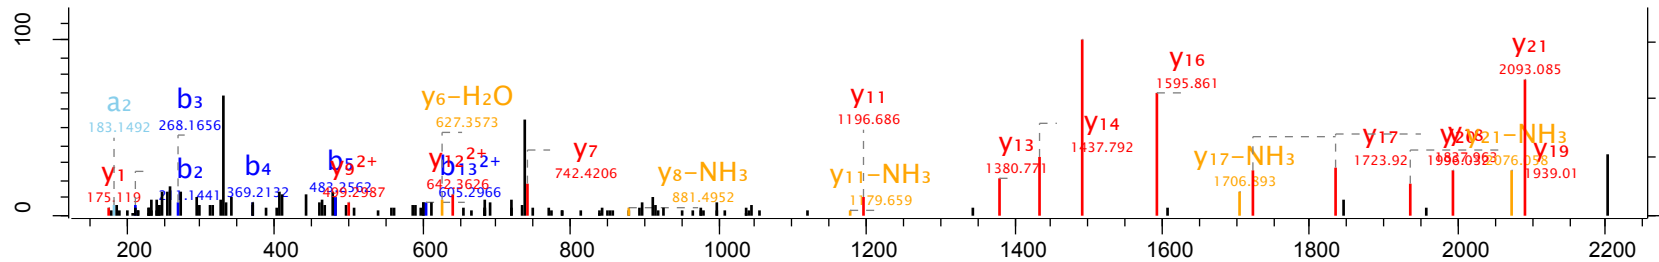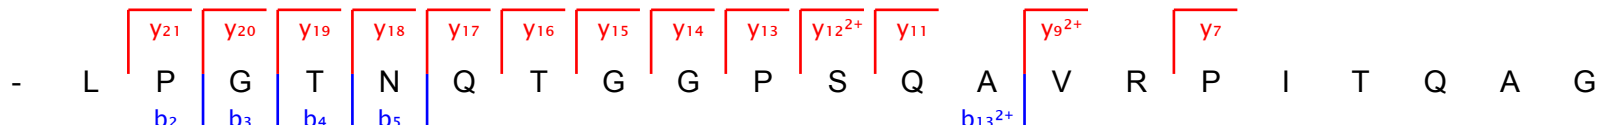

Raw file

20140918\_fract18\_dyn\_5ul\_F2\_01\_386

Scan

17566

Method

TOF; CID

Score

93.42

m/z

552.28

Gene names

HECA

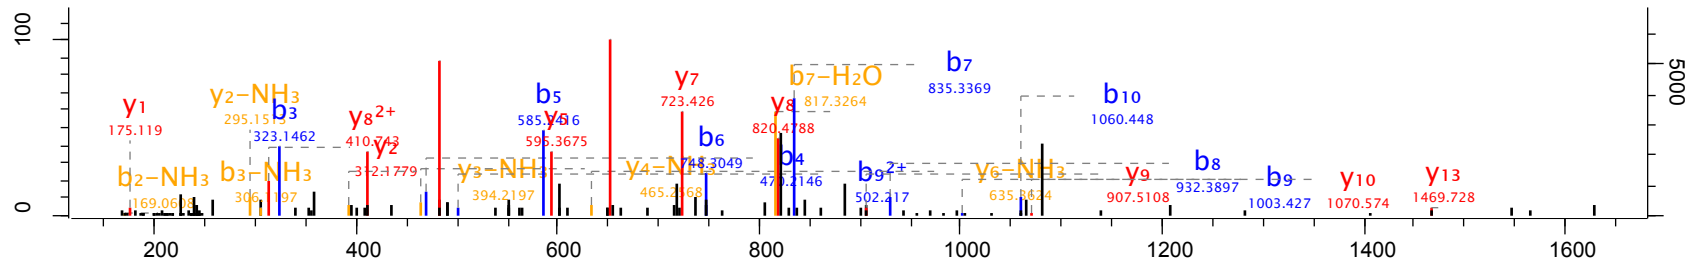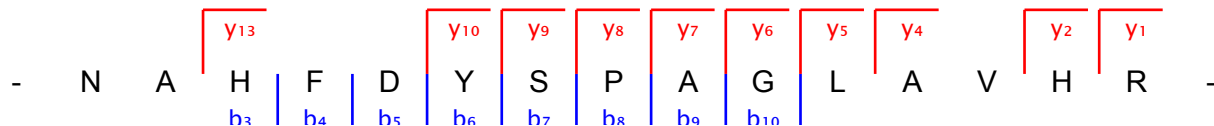



| Raw file                           | Scan  | Method   | Score | m/z   | Gene names |
|------------------------------------|-------|----------|-------|-------|------------|
| 20140918_fract18_dyn_5ul_F2_01_386 | 18760 | TOF; CID | 81.92 | 553.8 | C19orf43   |

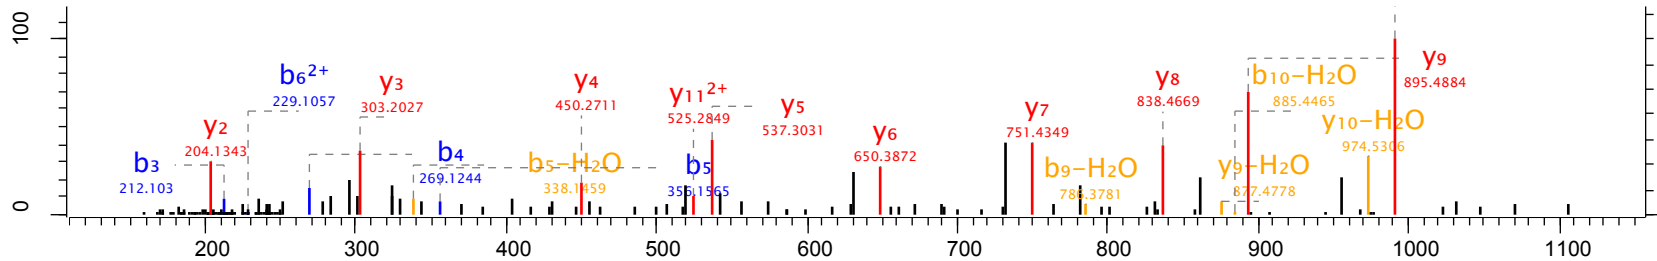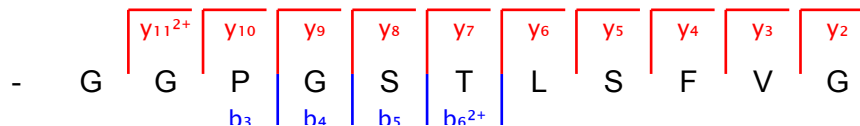

| Raw file                           | Scan  | Method   | Score | m/z    | Gene names |
|------------------------------------|-------|----------|-------|--------|------------|
| 20140918_fract18_dyn_5ul_F2_01_386 | 19576 | TOF; CID | 72.85 | 436.91 | LAMB2      |

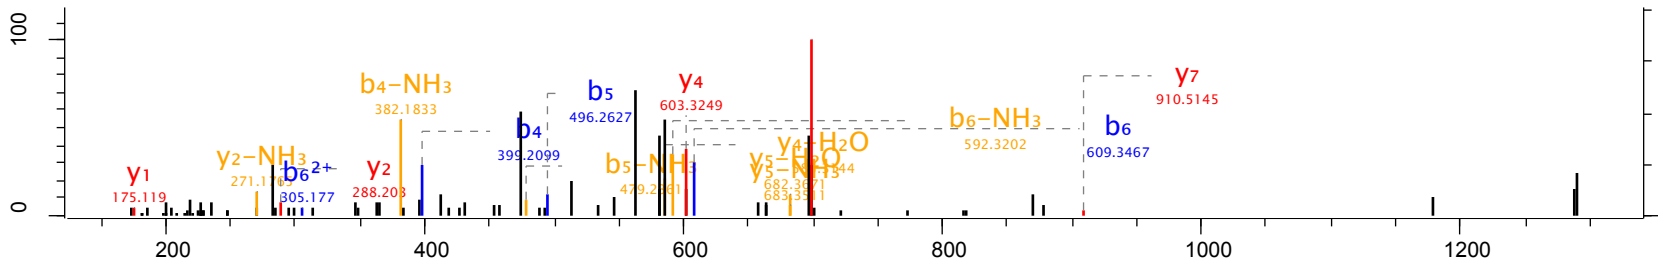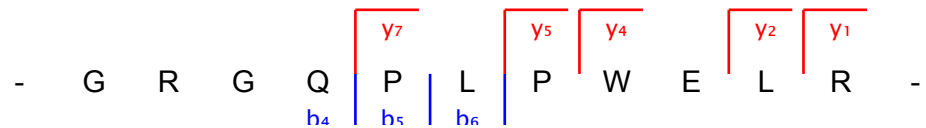

Raw file  
 20140918\_fract18\_dyn\_5ul\_F2\_01\_386

| Scan  | Method   | Score | m/z    | Gene names |
|-------|----------|-------|--------|------------|
| 21444 | TOF; CID | 63.38 | 868.38 | KREMEN2    |

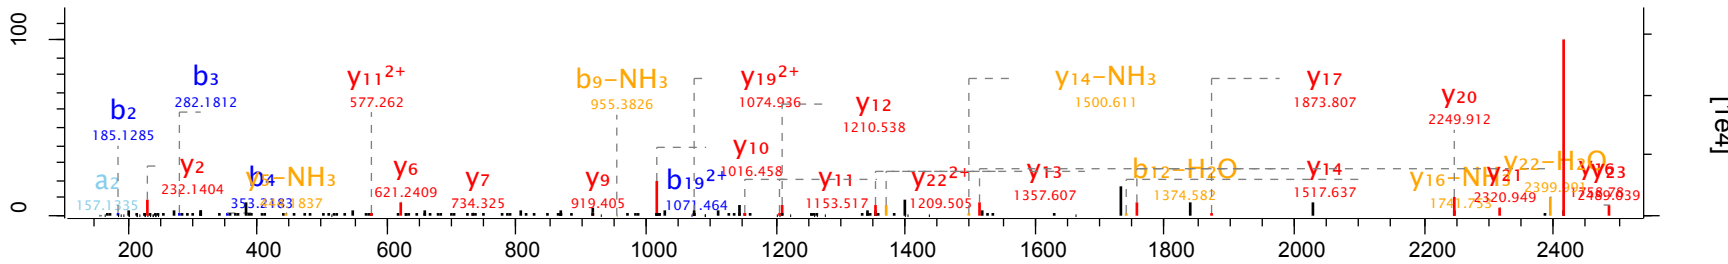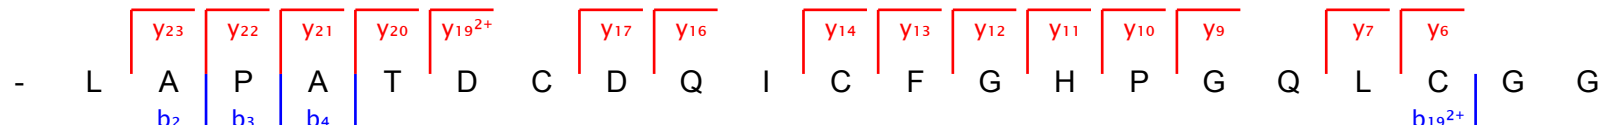

Raw file

20140918\_fract18\_dyn\_5ul\_F2\_01\_386

Scan

22470

Method

TOF; CID

Score

48.91

m/z

948.95

Gene names

FAM168B

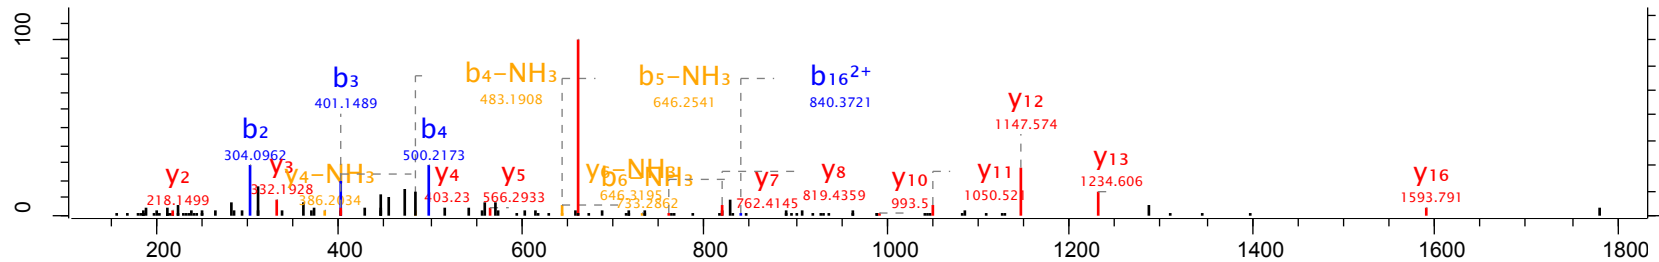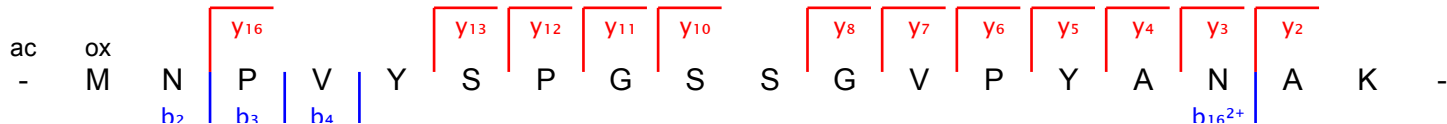

| Raw file                           | Scan  | Method   | Score  | m/z    | Gene names |
|------------------------------------|-------|----------|--------|--------|------------|
| 20140918_fract18_dyn_5ul_F2_01_386 | 23050 | TOF; CID | 108.09 | 506.24 | PLGRKT     |

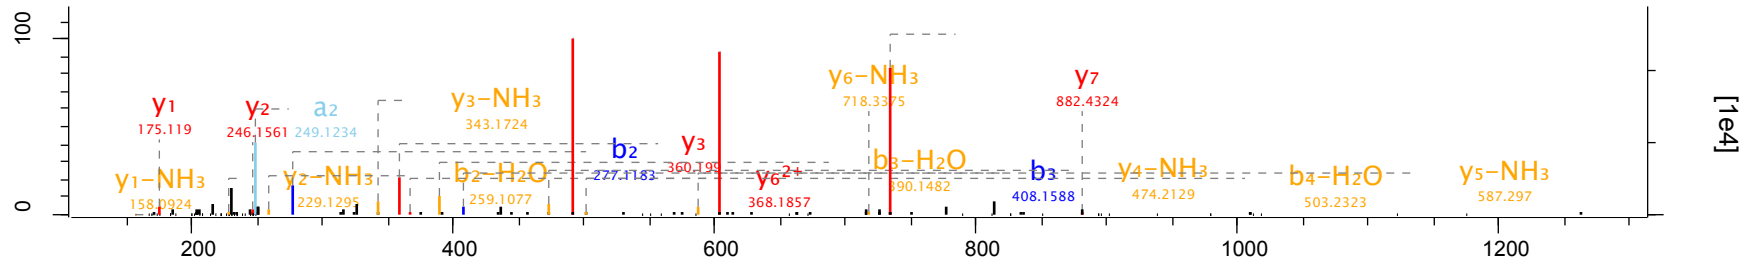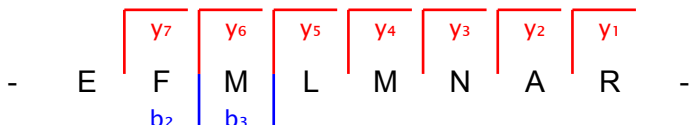

Raw file

20140918\_fract18\_dyn\_5ul\_F2\_01\_386

Scan

23633

Method

TOF; CID

Score

90.71

m/z

567.31

Gene names

TSPAN9

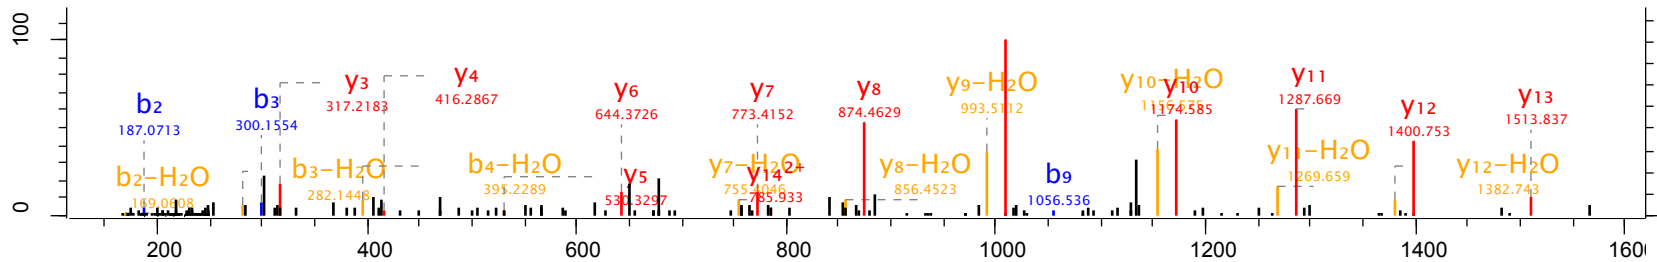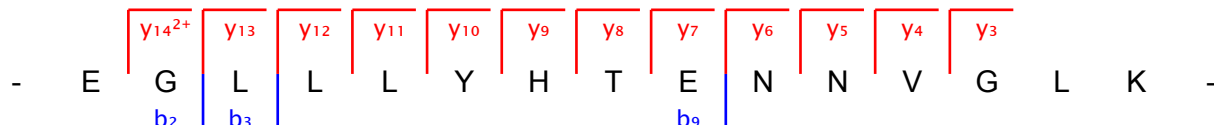

| Raw file                           | Scan  | Method   | Score | m/z    | Gene names |
|------------------------------------|-------|----------|-------|--------|------------|
| 20140918_fract18_dyn_5ul_F2_01_386 | 25409 | TOF; CID | 61.48 | 925.46 | PPDPF      |

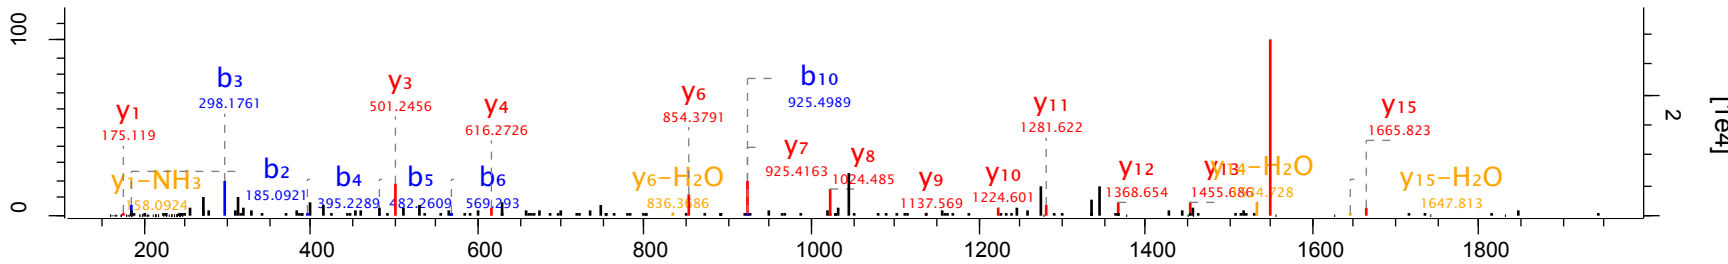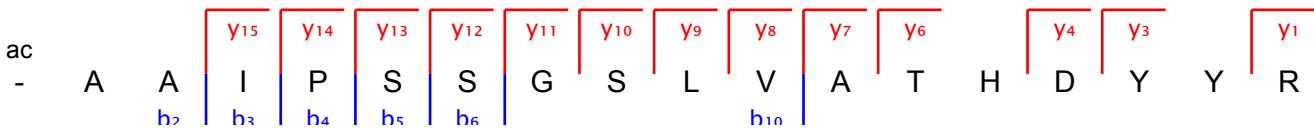

| Raw file                           | Scan  | Method   | Score | m/z    | Gene names |
|------------------------------------|-------|----------|-------|--------|------------|
| 20140918_fract18_dyn_5ul_F2_01_386 | 27114 | TOF; CID | 49.34 | 676.88 | BARX1      |

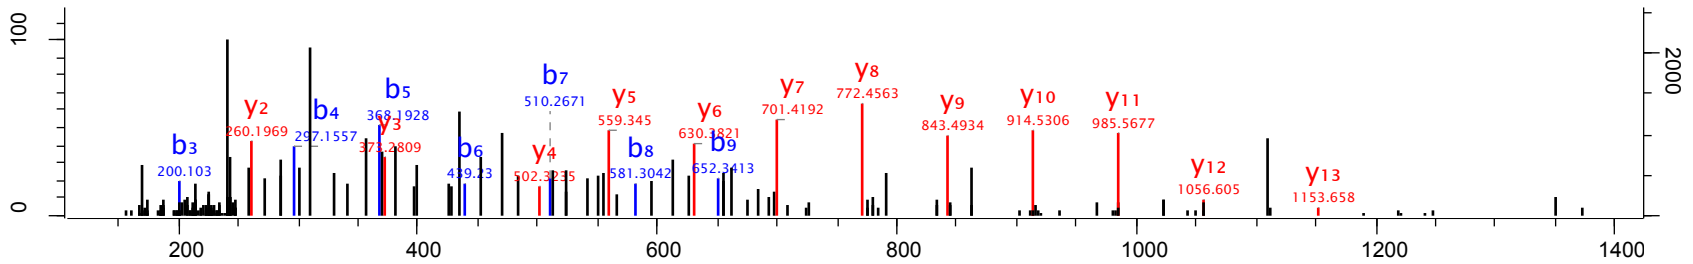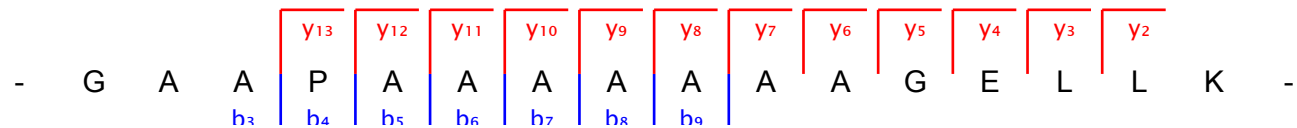



Raw file

20140918\_fract18\_dyn\_5ul\_F2\_01\_386

Scan

27291

Method

TOF; CID

Score

55.55

m/z

830.4

Gene names

C11orf74

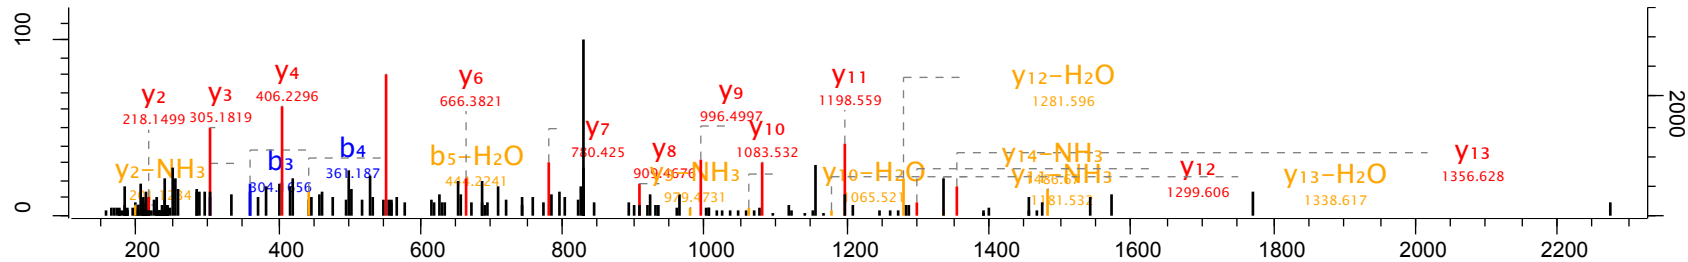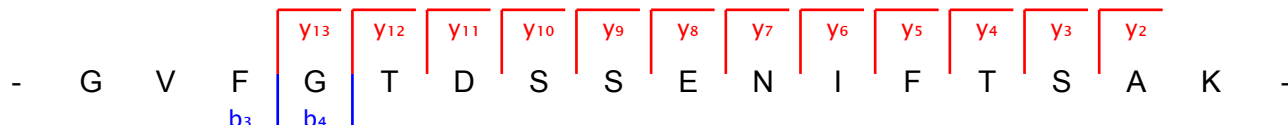

| Raw file                           | Scan  | Method   | Score  | m/z     | Gene names |
|------------------------------------|-------|----------|--------|---------|------------|
| 20140918_fract18_dyn_5ul_F2_01_386 | 29698 | TOF; CID | 103.42 | 1101.17 | CEBPG      |

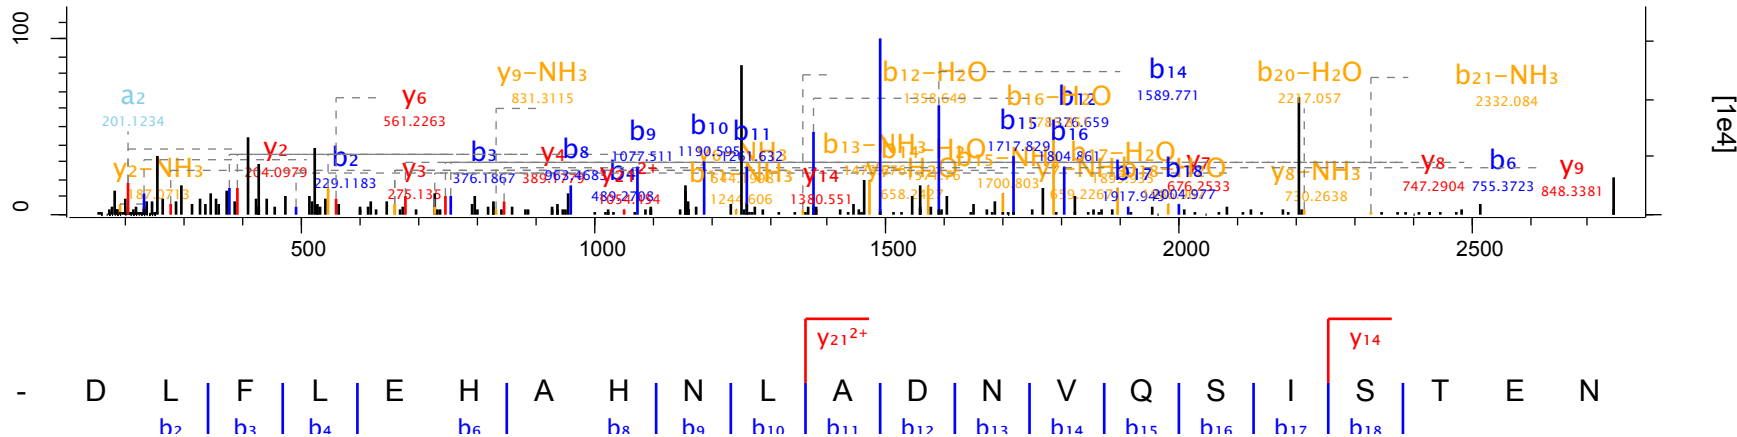

| Raw file                           | Scan  | Method   | Score | m/z    | Gene names |
|------------------------------------|-------|----------|-------|--------|------------|
| 20140918_fract18_dyn_5ul_F2_01_386 | 29705 | TOF; CID | 28.43 | 688.34 | EIF4EBP1   |

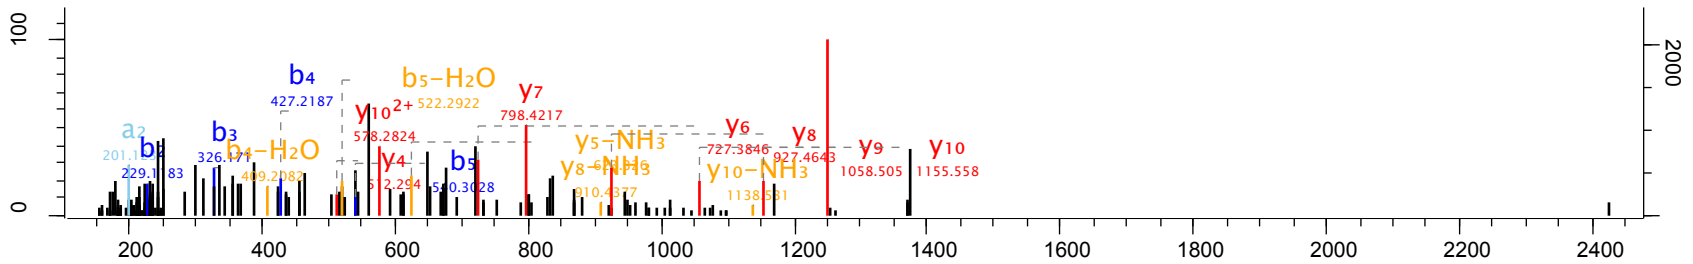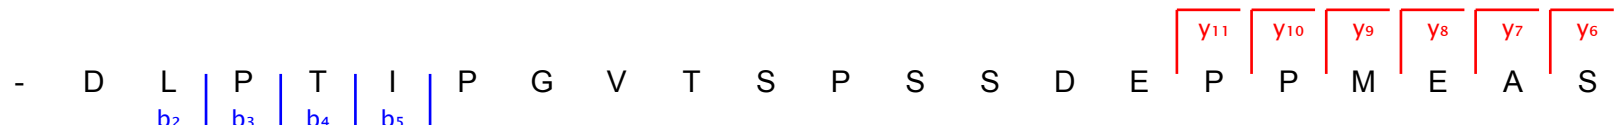

| Raw file                           | Scan  | Method   | Score | m/z    | Gene names |
|------------------------------------|-------|----------|-------|--------|------------|
| 20140918_fract18_dyn_5ul_F2_01_386 | 30818 | TOF; CID | 70.94 | 633.81 | BACE1      |

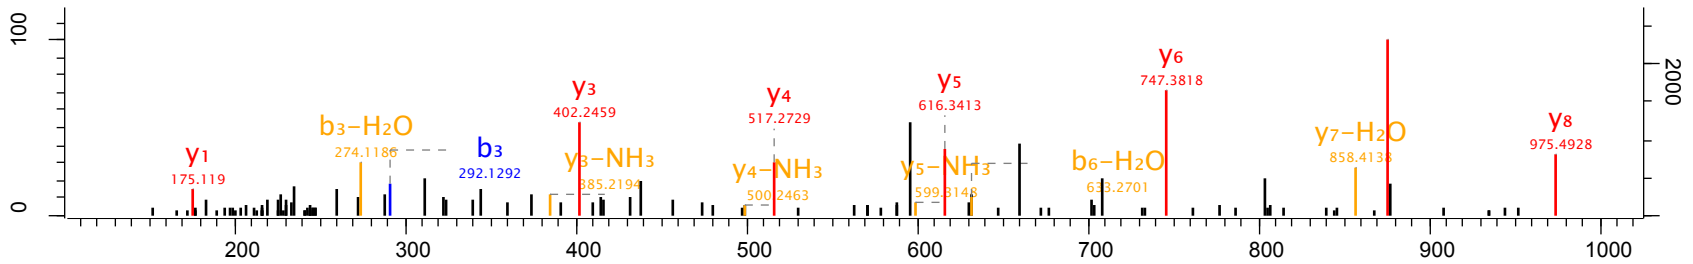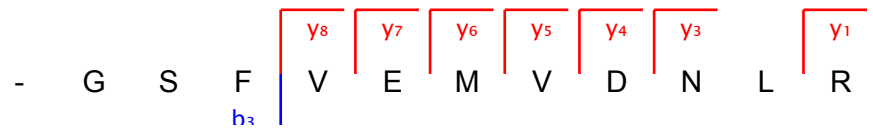

| Raw file                           | Scan  | Method   | Score | m/z | Gene names |
|------------------------------------|-------|----------|-------|-----|------------|
| 20140918_fract18_dyn_5ul_F2_01_386 | 32742 | TOF; CID | 85.56 | 968 | EFHC1      |

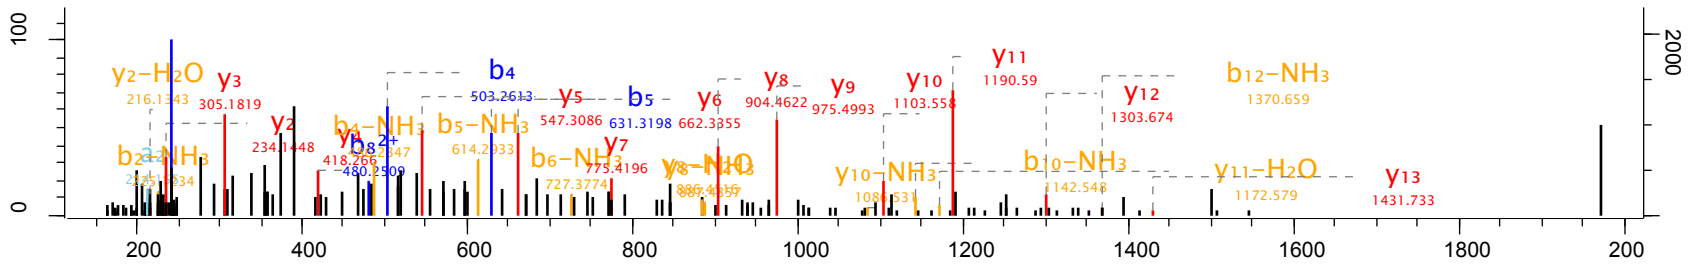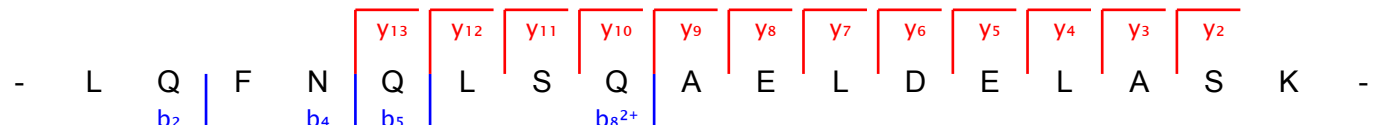

| Raw file                           | Scan  | Method   | Score | m/z    | Gene names |
|------------------------------------|-------|----------|-------|--------|------------|
| 20140918_fract18_dyn_5ul_F2_01_386 | 34286 | TOF; CID | 70.2  | 808.43 | NAA60      |

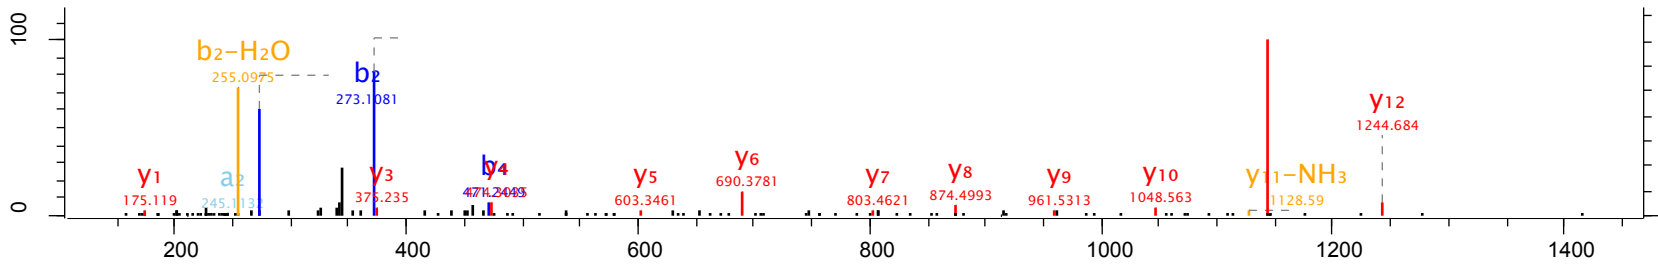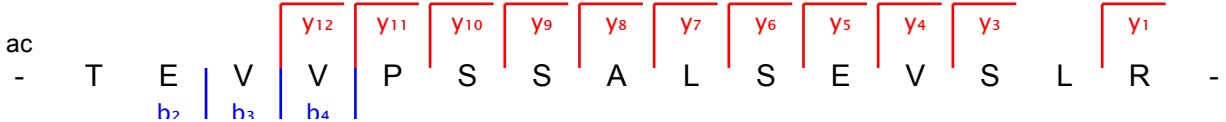

| Raw file                           | Scan  | Method   | Score | m/z    | Gene names |
|------------------------------------|-------|----------|-------|--------|------------|
| 20140918_fract18_dyn_5ul_F2_01_386 | 34809 | TOF; CID | 76.12 | 748.38 | PTPN14     |

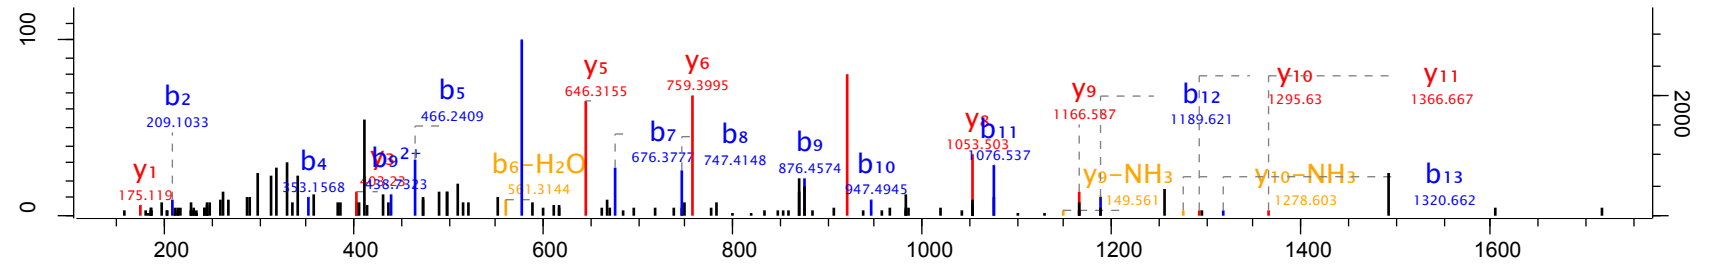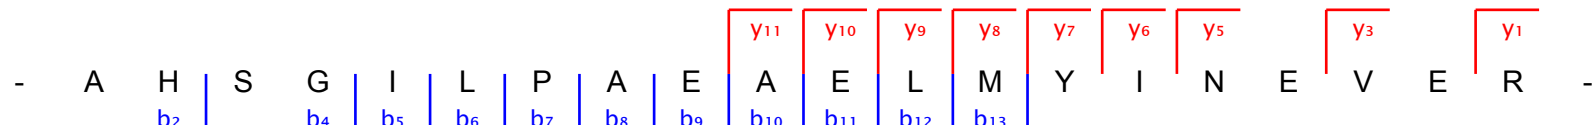

Raw file: 20140918\_fract18\_dyn\_5ul\_F2\_01\_386  
 Scan: 35229  
 Method: TOF; CID  
 Score: 77.78  
 m/z: 742.89  
 Gene names: AURKAIP1

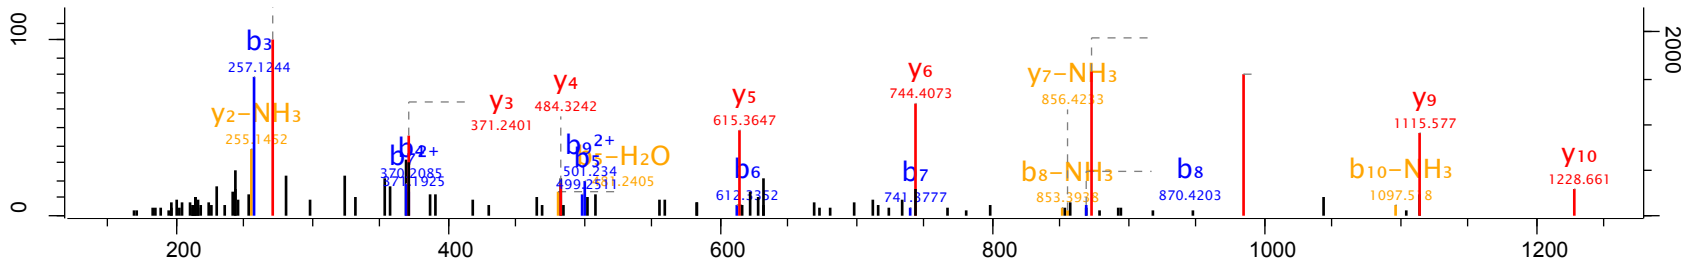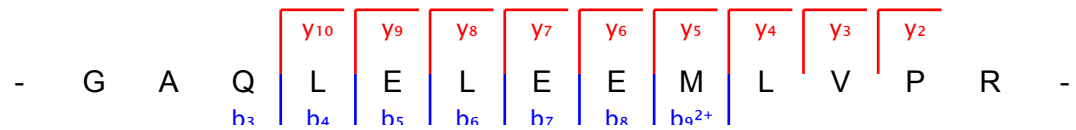



Raw file

Scan

Method

Score

m/z

Gene names

20140918\_fract18\_dyn\_5ul\_F2\_01\_386

36870

TOF; CID

76.97

1015.17

ADIRF

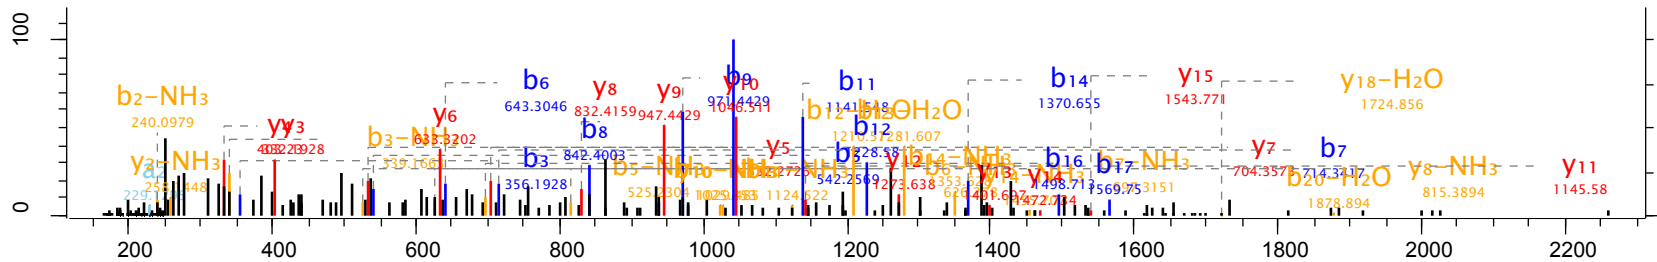

- Q Q | V | E G | T | A | Q | E | A | V | S | A A | G A A A Q Q V

a<sub>2</sub> | b<sub>3</sub> | b<sub>5</sub> | b<sub>6</sub> | b<sub>7</sub> | b<sub>8</sub> | b<sub>9</sub> | b<sub>10</sub> | b<sub>11</sub> | b<sub>12</sub> | b<sub>14</sub> | b<sub>16</sub> | b<sub>17</sub>

y<sub>15</sub> | y<sub>14</sub> | y<sub>13</sub> | y<sub>12</sub> | y<sub>11</sub>

| Raw file                           | Scan  | Method   | Score | m/z   | Gene names |
|------------------------------------|-------|----------|-------|-------|------------|
| 20140918_fract19_dyn_5ul_F3_01_387 | 15790 | TOF; CID | 88.5  | 499.8 | DNAJB14    |

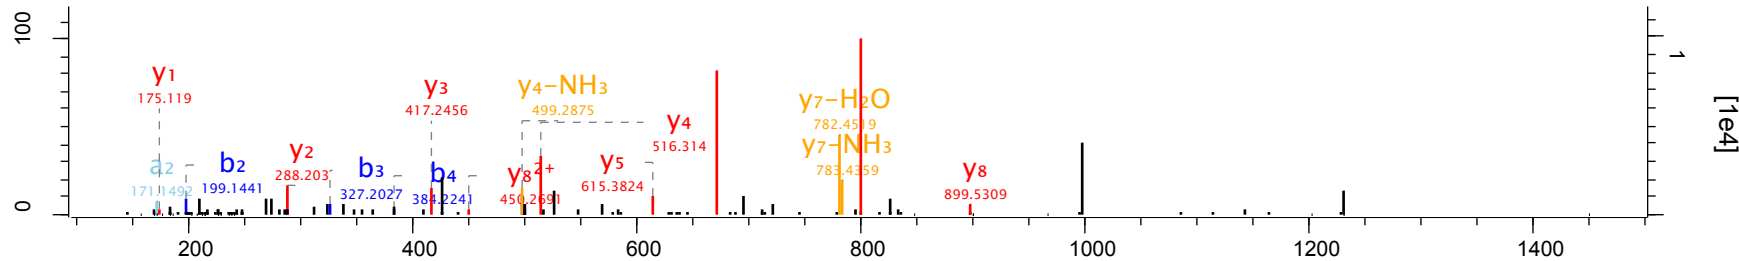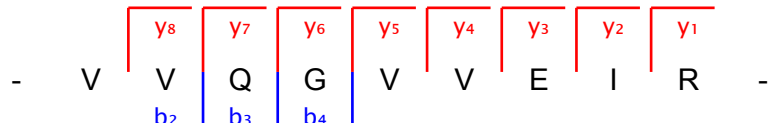

Raw file  
 20140918\_fract19\_dyn\_5ul\_F3\_01\_387

| Scan  | Method   | Score | m/z    |
|-------|----------|-------|--------|
| 17028 | TOF; CID | 90.79 | 631.82 |

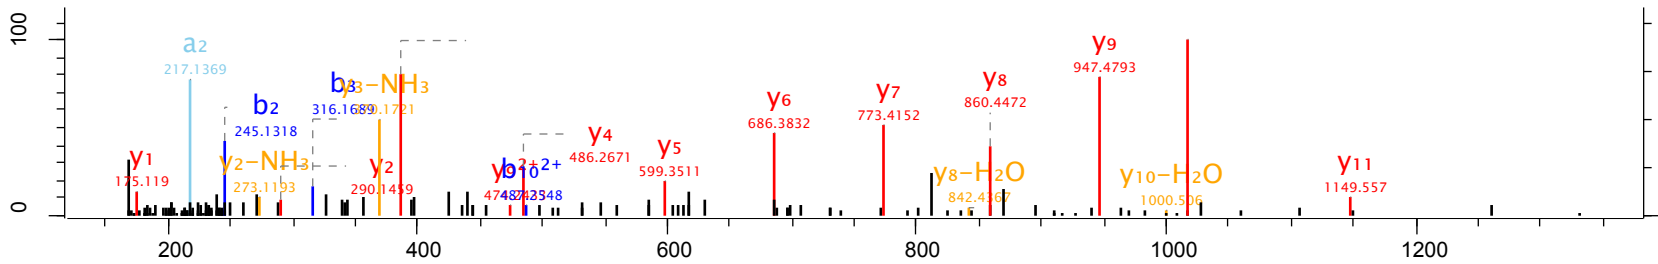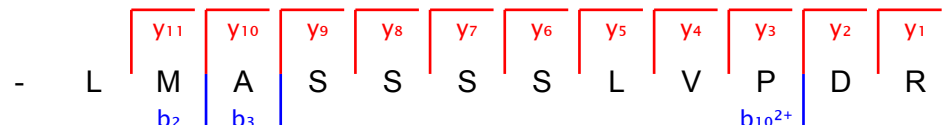

Raw file

20140918\_fract19\_dyn\_5ul\_F3\_01\_387

Scan

18389

Method

TOF; CID

Score

147.52

m/z

476.24

Gene names

MAPK15

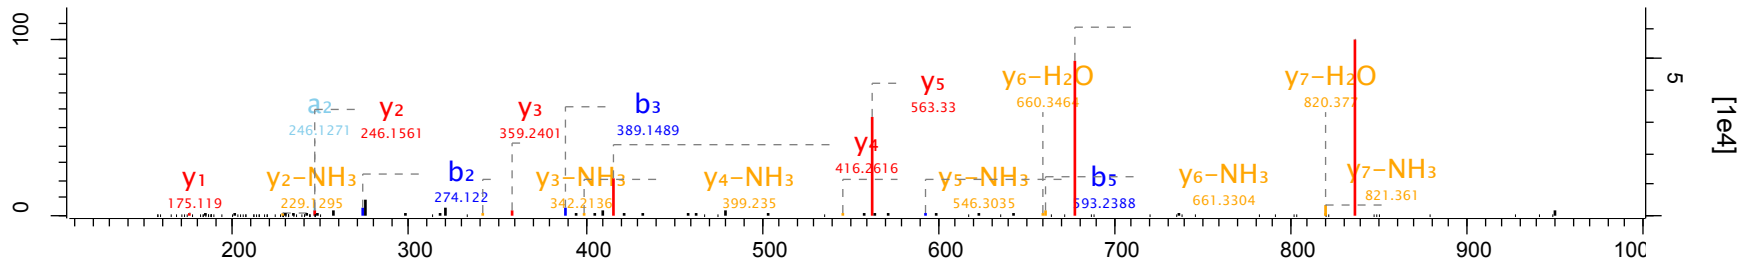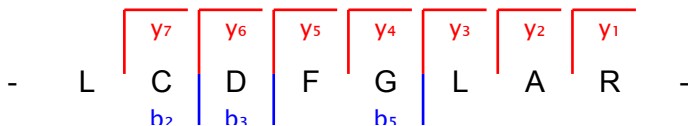

Raw file

20140918\_fract19\_dyn\_5ul\_F3\_01\_387

Scan

19285

Method

TOF; CID

Score

95.41

m/z

731.36

Gene names

ZDHHC24

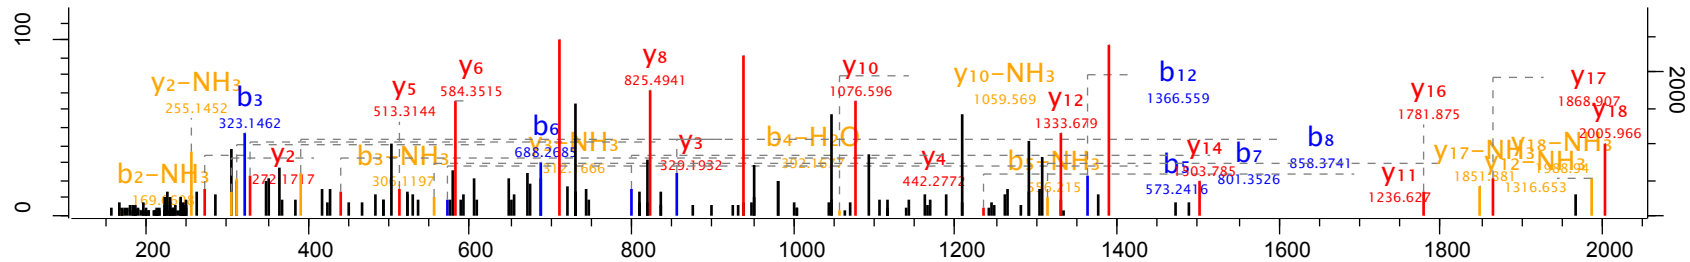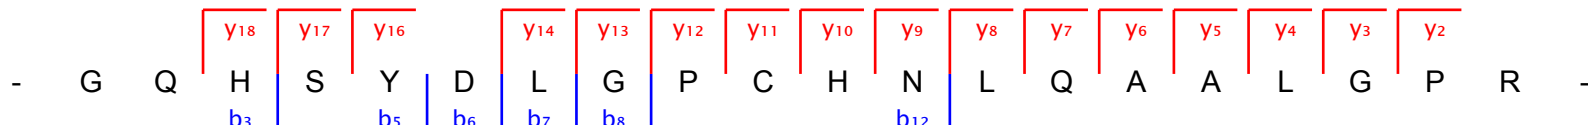

| Raw file                           | Scan  | Method   | Score | m/z    | Gene names |
|------------------------------------|-------|----------|-------|--------|------------|
| 20140918_fract19_dyn_5ul_F3_01_387 | 19929 | TOF; CID | 78.15 | 559.76 | ZNF77      |

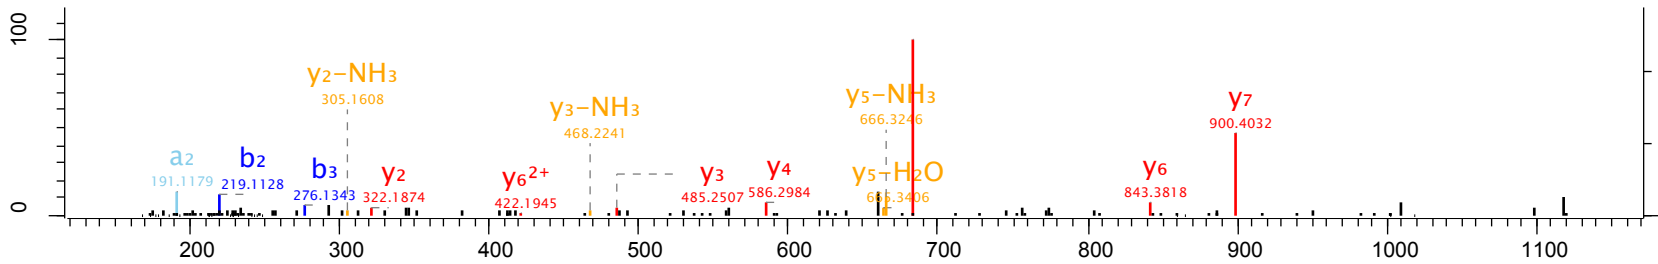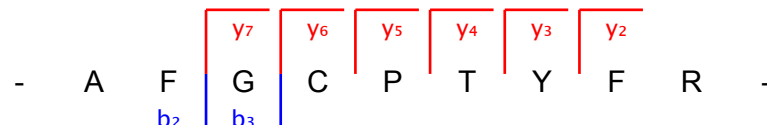

[1e4]

| Raw file                           | Scan  | Method   | Score | m/z    | Gene names |
|------------------------------------|-------|----------|-------|--------|------------|
| 20140918_fract19_dyn_5ul_F3_01_387 | 24337 | TOF; CID | 79.09 | 771.36 | FBXO17     |

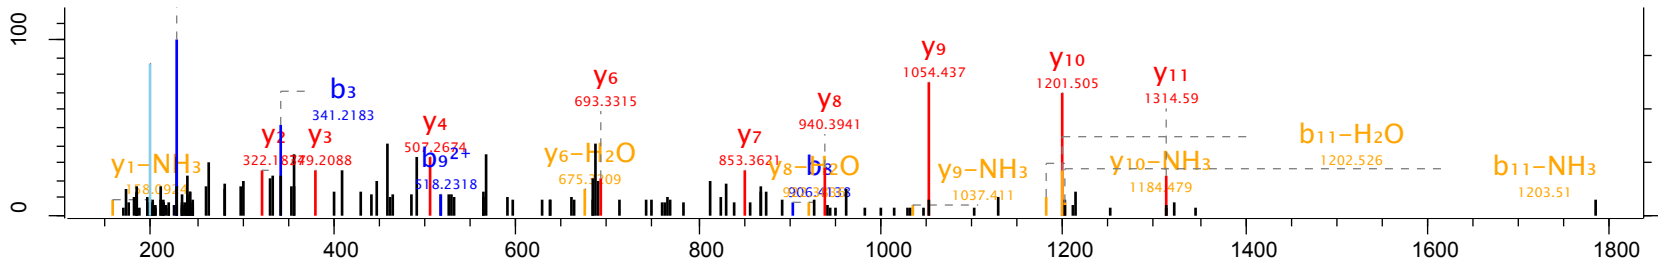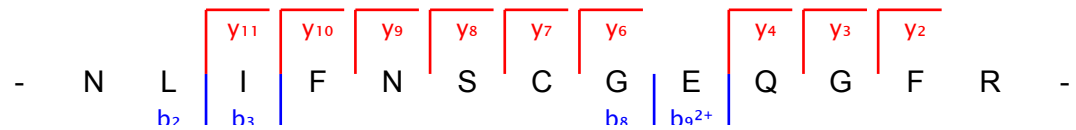

Raw file

20140918\_fract19\_dyn\_5ul\_F3\_01\_387

Scan

34988

Method

TOF; CID

Score

83.42

m/z

1091.52

Gene names

CDKN2AIPNL

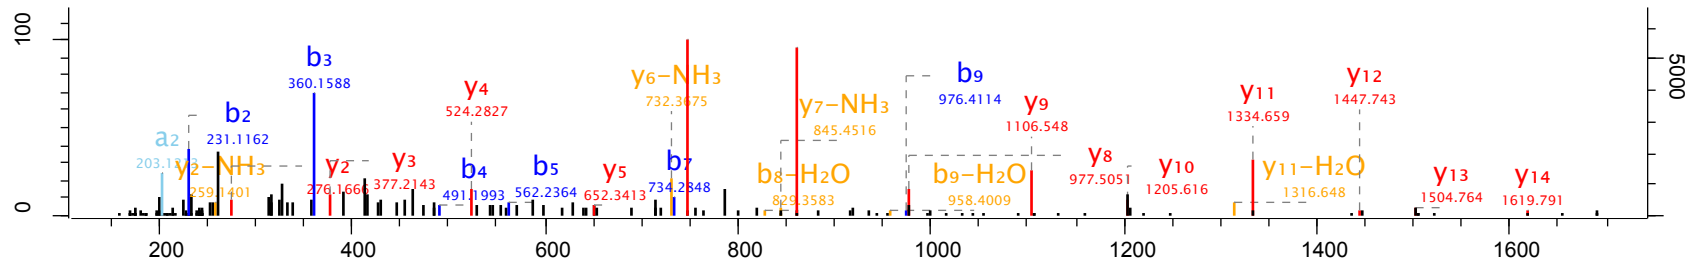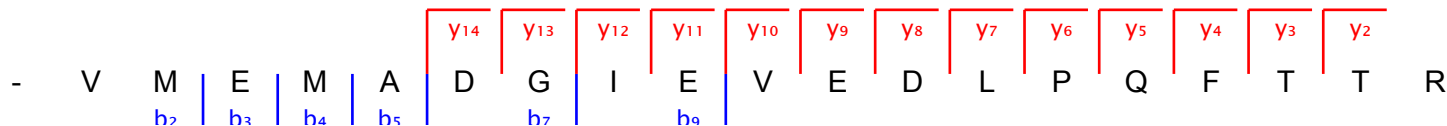



| Raw file                           | Scan  | Method   | Score | m/z    | Gene names |
|------------------------------------|-------|----------|-------|--------|------------|
| 20140918_fract19_dyn_5ul_F3_01_387 | 37851 | TOF; CID | 75.76 | 565.02 | SMIM11     |

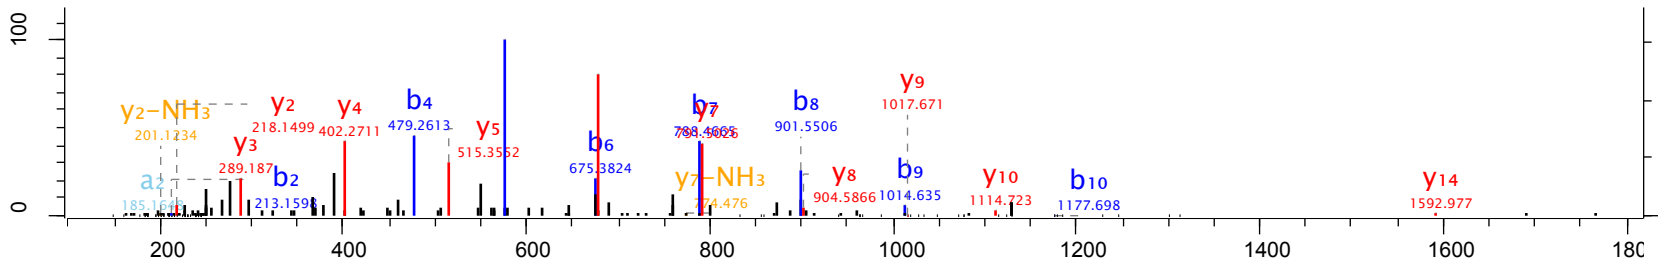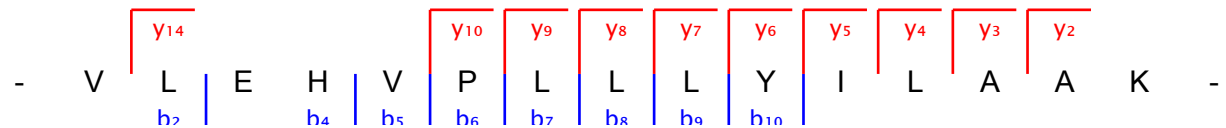

[1e4]

Raw file

20140918\_fract20\_dyn\_5ul\_F4\_01\_388

Scan

10698

Method

TOF; CID

Score

108.09

m/z

495.28

Gene names

ARID3B

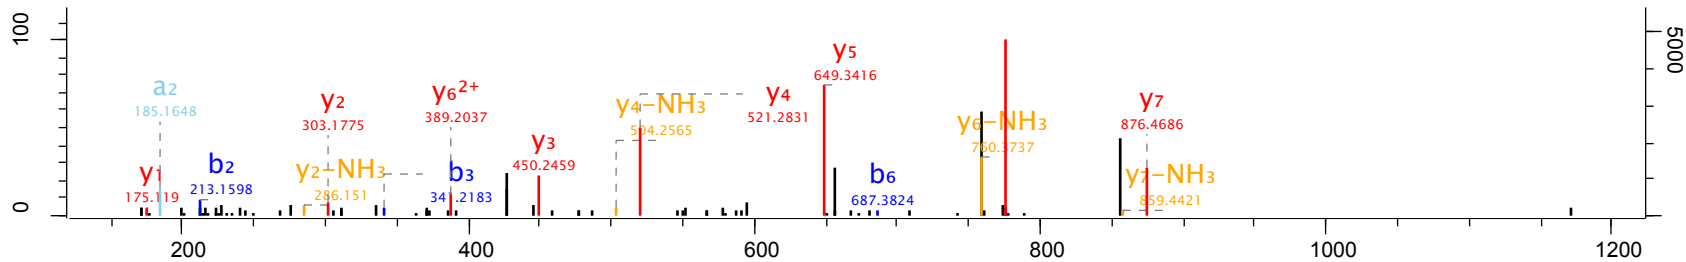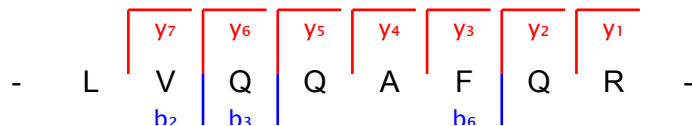

Raw file

20140918\_fract20\_dyn\_5ul\_F4\_01\_388

Scan

16067

Method

TOF; CID

Score

93.18

m/z

505.78

Gene names

NAIF1

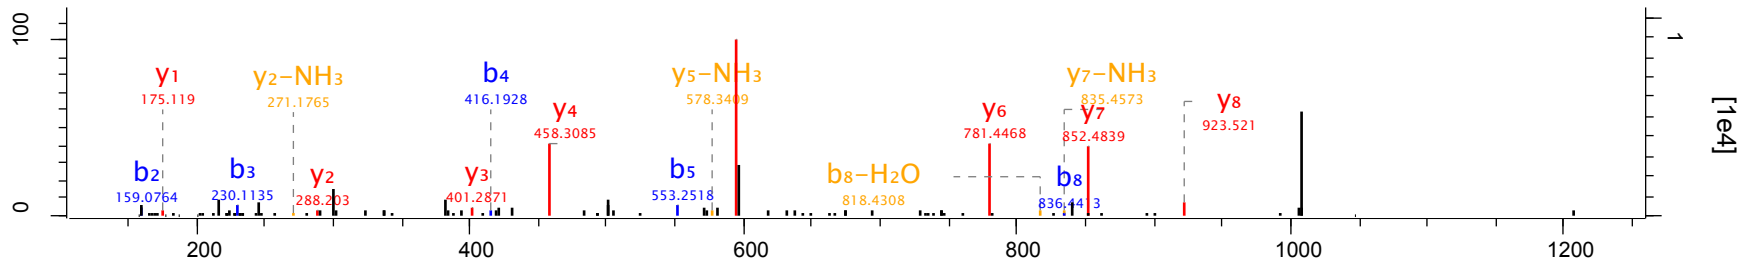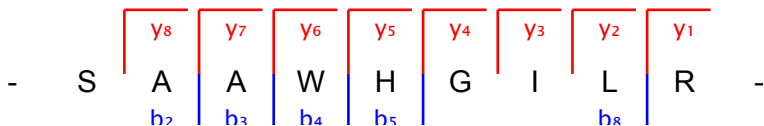

Raw file

20140918\_fract20\_dyn\_5ul\_F4\_01\_388

Scan

17487

Method

TOF; CID

Score

30.94

m/z

624.83

Gene names

ZNF831

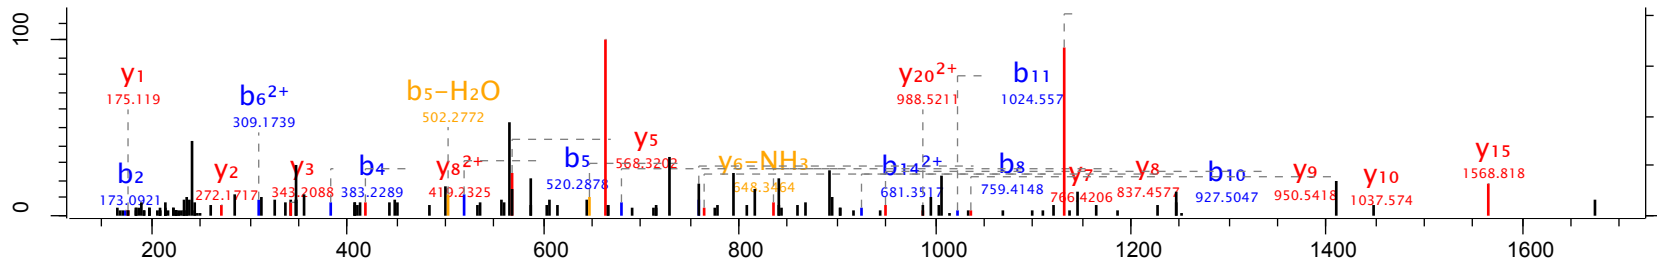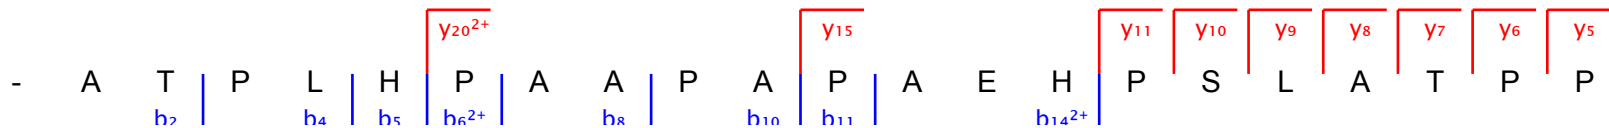

| Raw file                           | Scan  | Method   | Score | m/z    | Gene names |
|------------------------------------|-------|----------|-------|--------|------------|
| 20140918_fract20_dyn_5ul_F4_01_388 | 20434 | TOF; CID | 90.71 | 476.26 | TPCN2      |

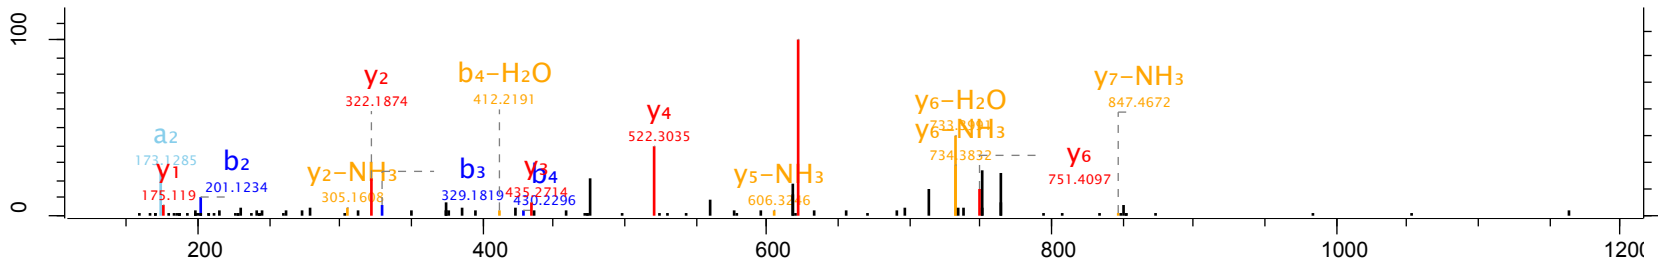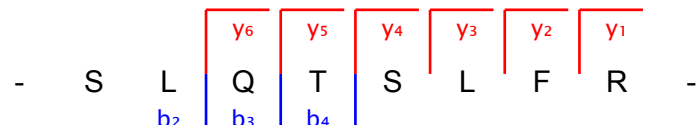

| Raw file                           | Scan  | Method   | Score | m/z    | Gene names |
|------------------------------------|-------|----------|-------|--------|------------|
| 20140918_fract20_dyn_5ul_F4_01_388 | 21256 | TOF; CID | 90.83 | 614.86 | C2orf68    |

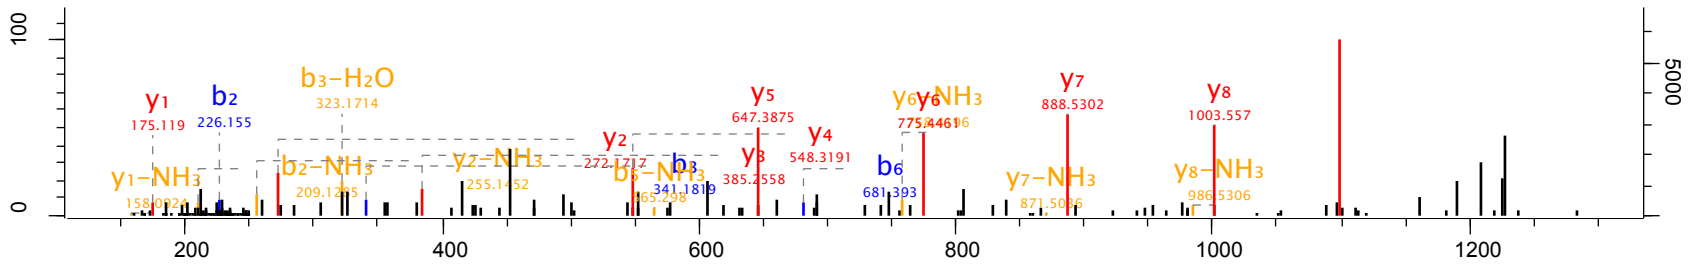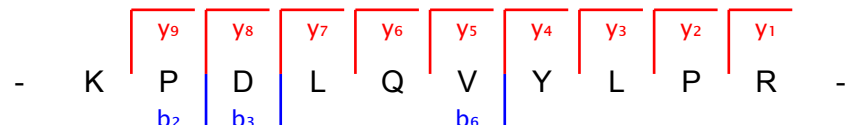

| Raw file                           | Scan  | Method   | Score | m/z    | Gene names |
|------------------------------------|-------|----------|-------|--------|------------|
| 20140918_fract20_dyn_5ul_F4_01_388 | 23570 | TOF; CID | 65.18 | 680.31 | C16orf87   |

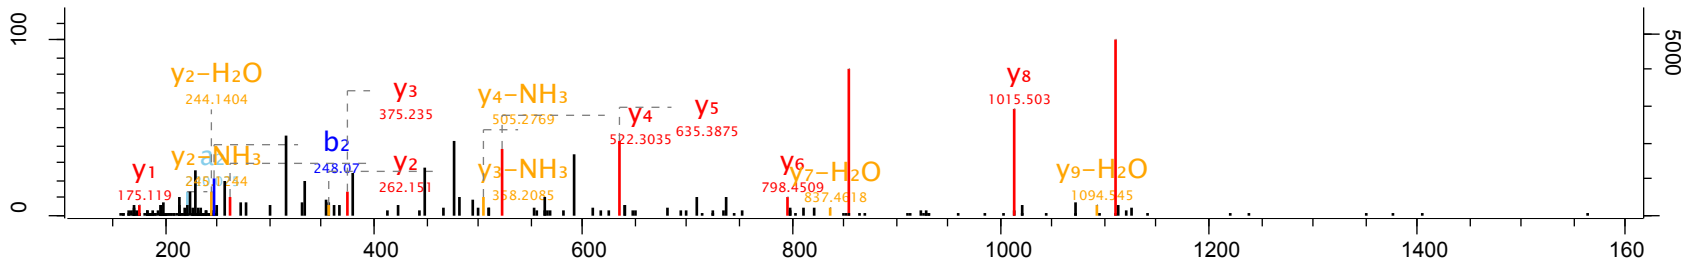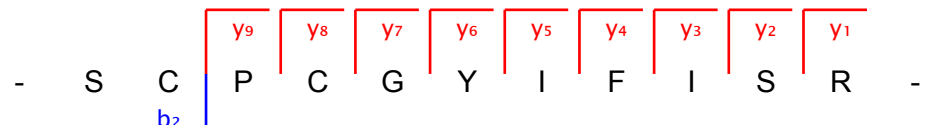

Raw file

20140918\_fract20\_dyn\_5ul\_F4\_01\_388

Scan

27036

Method

TOF; CID

Score

91.59

m/z

718.05

Gene names

DTD2

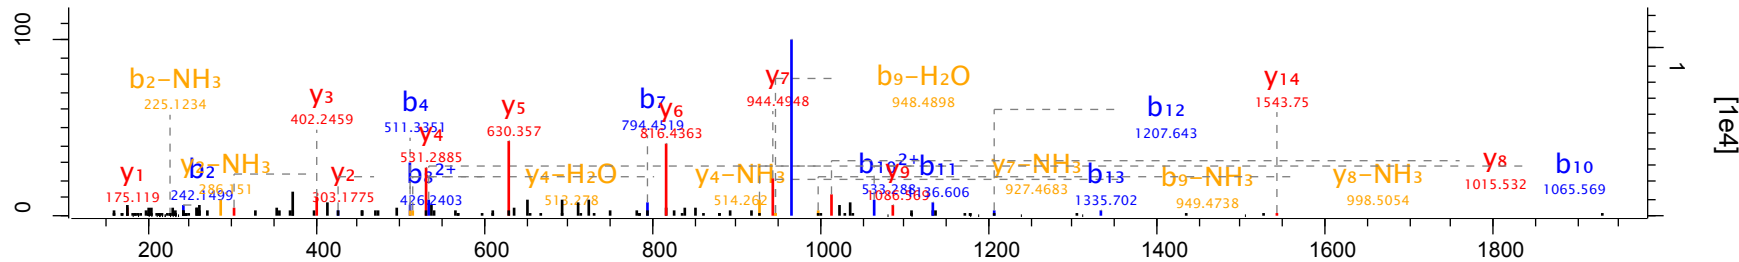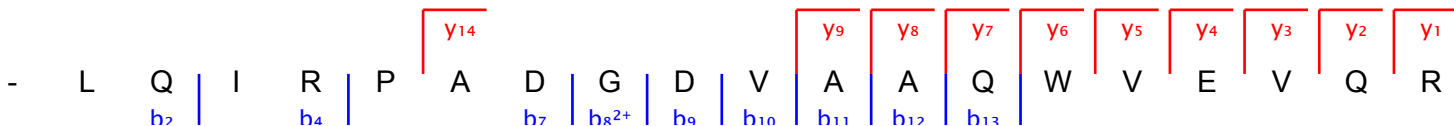



| Raw file                           | Scan  | Method   | Score | m/z    | Gene names |
|------------------------------------|-------|----------|-------|--------|------------|
| 20140918_fract20_dyn_5ul_F4_01_388 | 27422 | TOF; CID | 94.12 | 493.24 | CCDC82     |

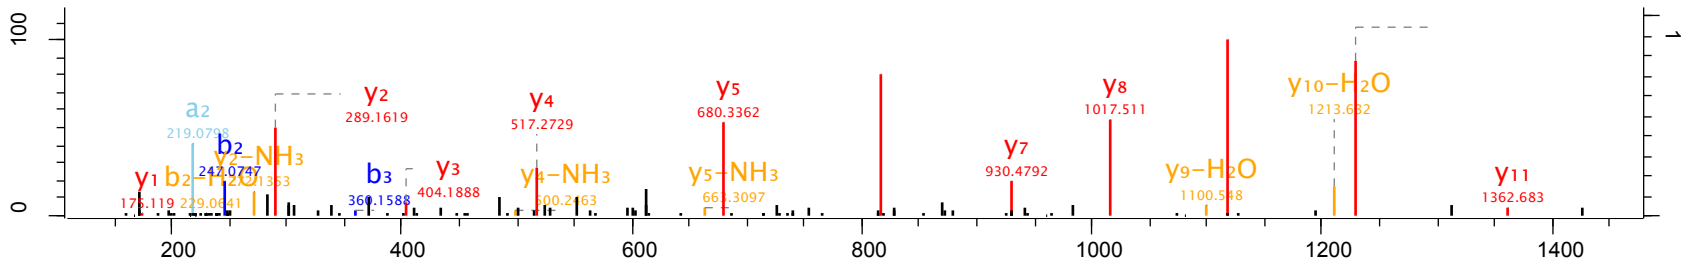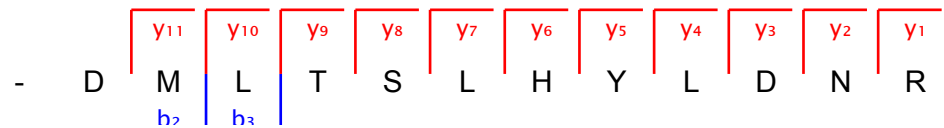

Raw file

20140918\_fract20\_dyn\_5ul\_F4\_01\_388

Scan

30172

Method

TOF; CID

Score

95.57

m/z

622.31

Gene names

C1QTNF6

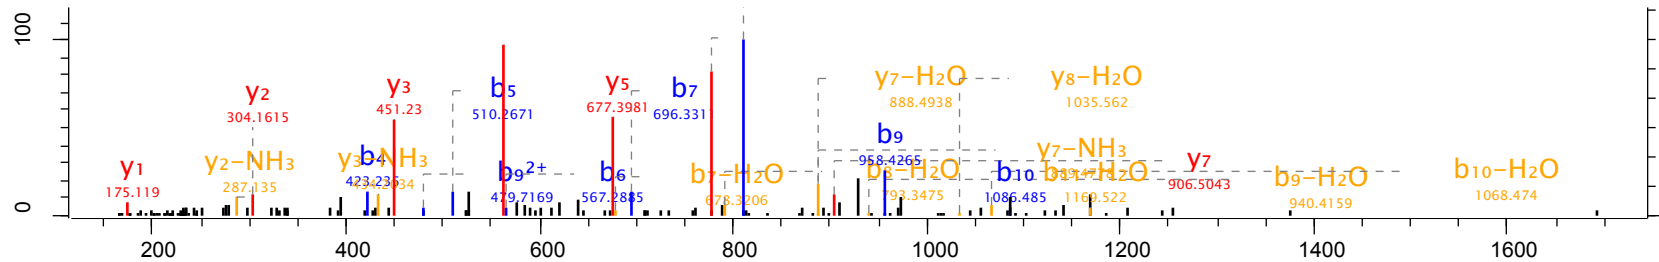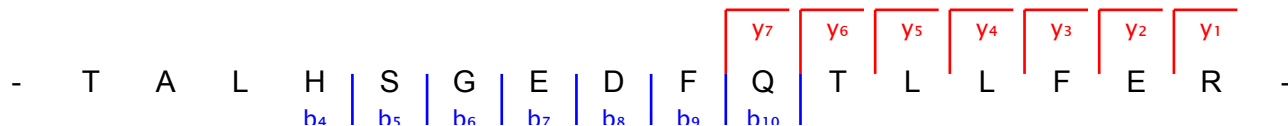

Raw file

20140918\_fract20\_dyn\_5ul\_F4\_01\_388

Scan

35695

Method

TOF; CID

Score

41.51

m/z

1073.57

Gene names

ULK4

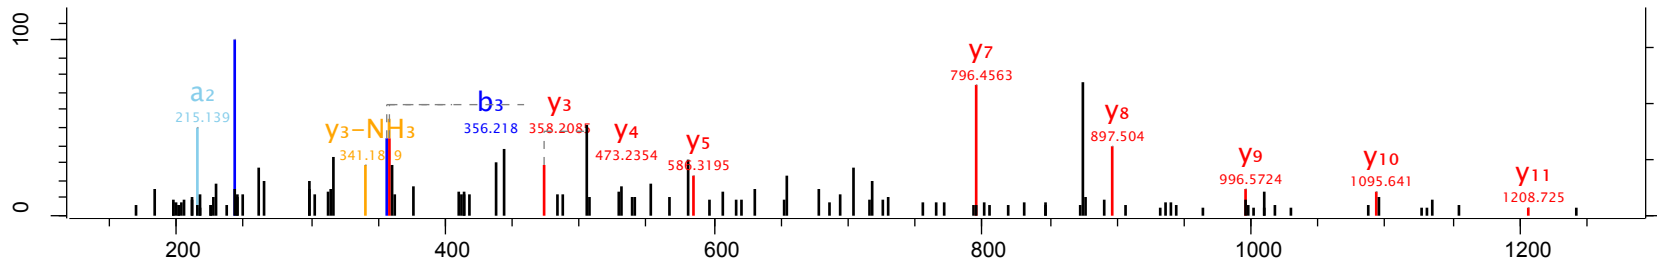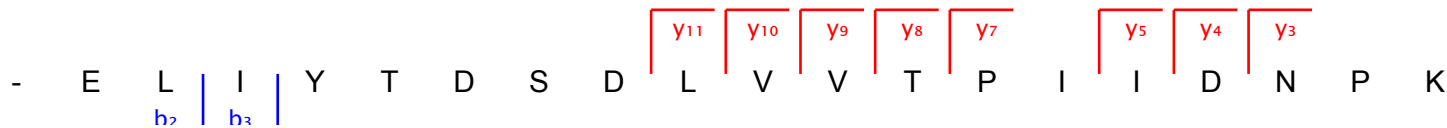

Raw file

20140918\_fract21\_dyn\_5ul\_F5\_01\_389

Scan

19644

Method

TOF; CID

Score

65.04

m/z

627.36

Gene names

C17orf97

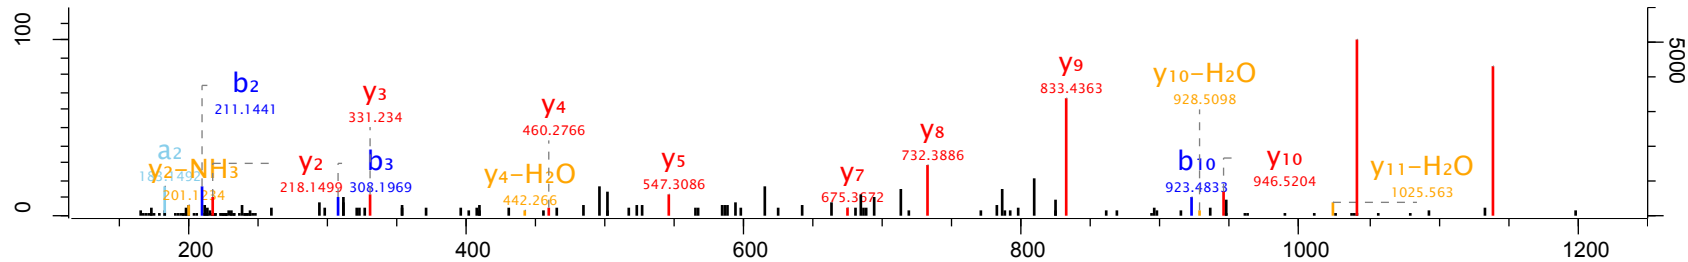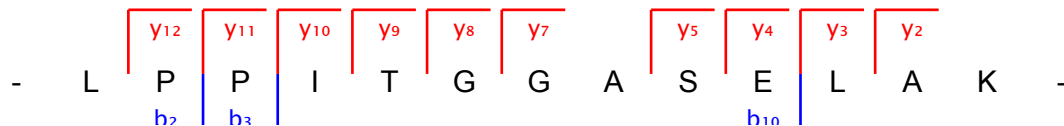

Raw file

20140918\_fract21\_dyn\_5ul\_F5\_01\_389

Scan

19673

Method

TOF; CID

Score

39.68

m/z

771.05

Gene names

RPUSD1

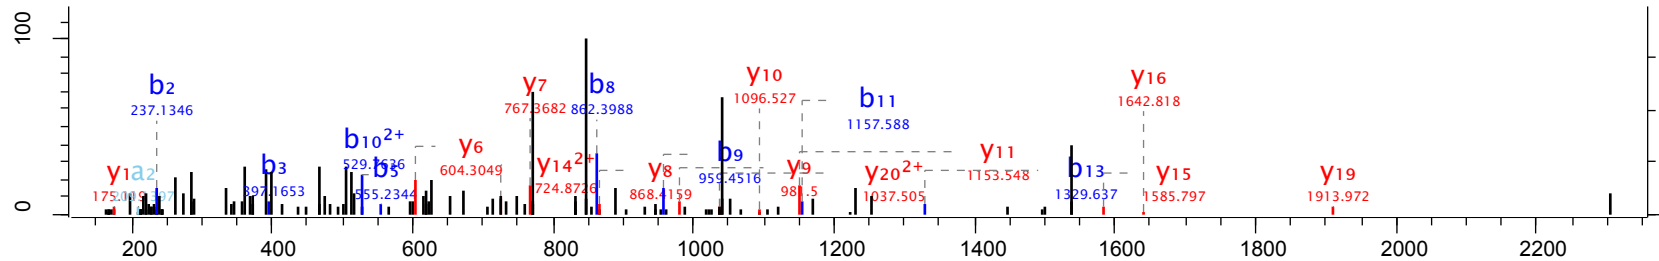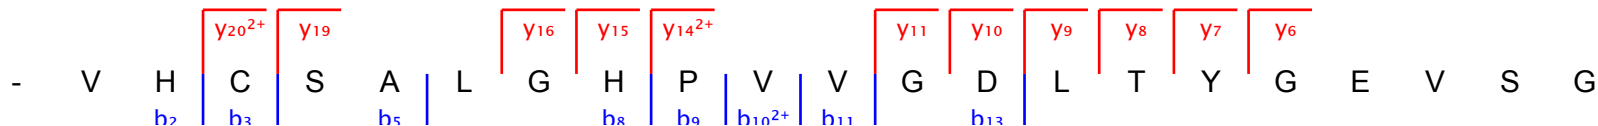

| Raw file                           | Scan  | Method   | Score | m/z    | Gene names |
|------------------------------------|-------|----------|-------|--------|------------|
| 20140918_fract21_dyn_5ul_F5_01_389 | 20694 | TOF; CID | 51.03 | 749.39 | TMEM67     |

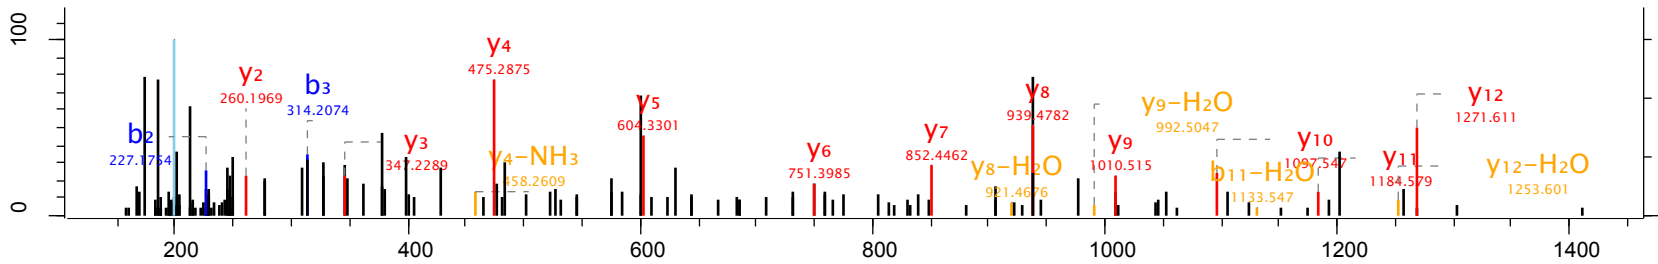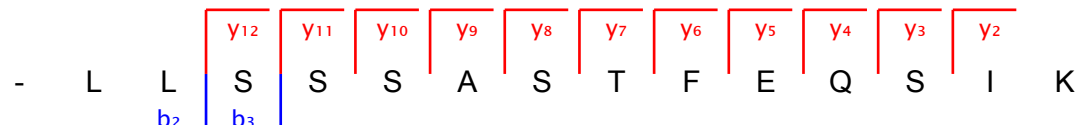

Raw file

20140918\_fract21\_dyn\_5ul\_F5\_01\_389

Scan

22241

Method

TOF; CID

Score

69.77

m/z

999.01

Gene names

LMO4

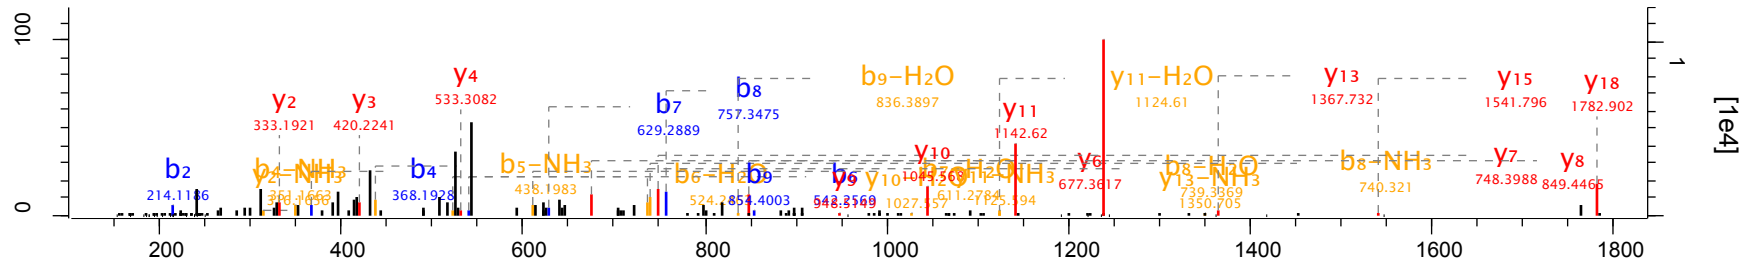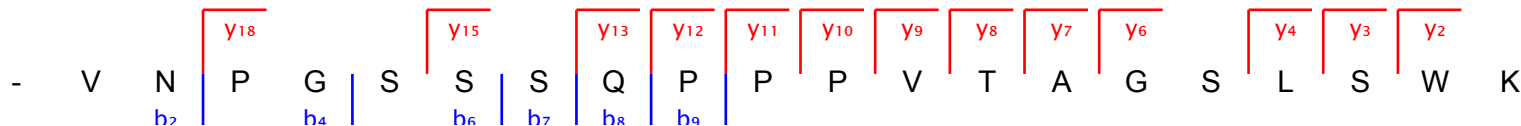

Raw file

20140918\_fract21\_dyn\_5ul\_F5\_01\_389

Scan

23432

Method

TOF; CID

Score

91.81

m/z

544.29

Gene names

FN1

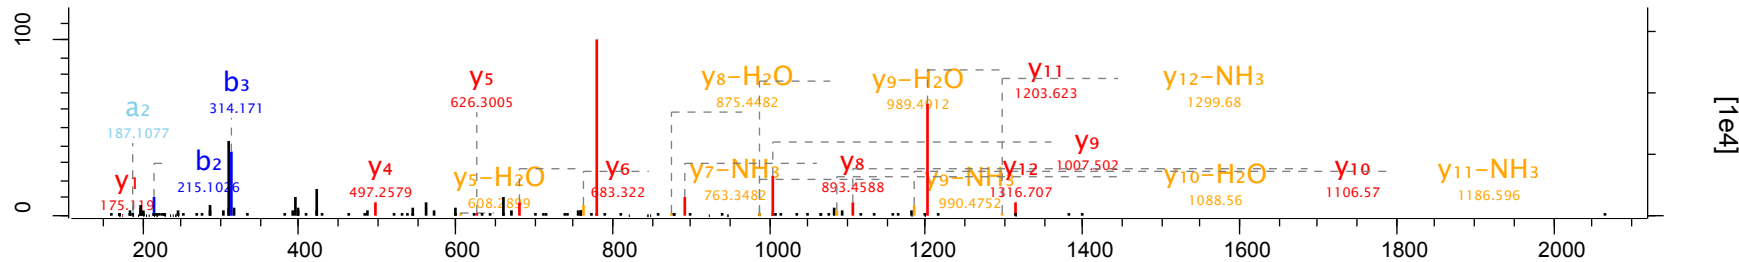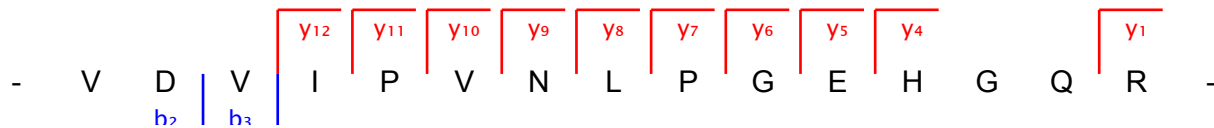



Raw file

20140918\_fract21\_dyn\_5ul\_F5\_01\_389

Scan

24025

Method

TOF; CID

Score

52.48

m/z

741.03

Gene names

ZBTB8A

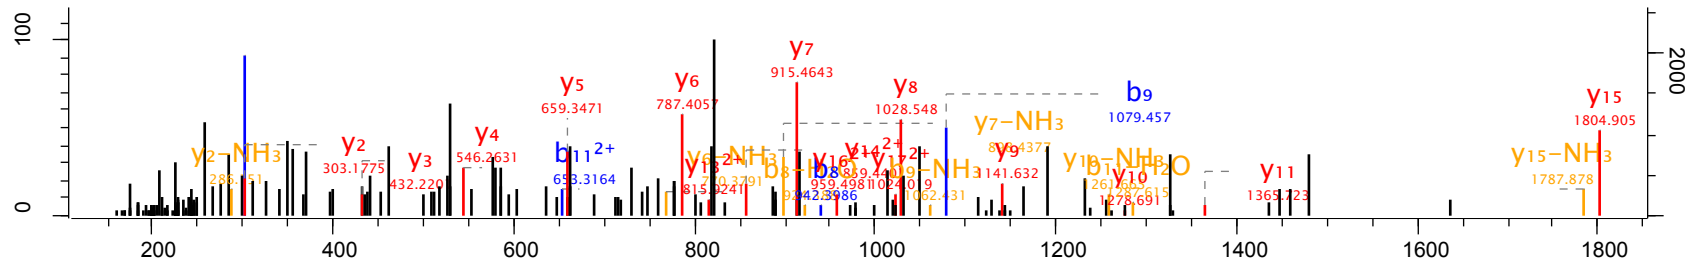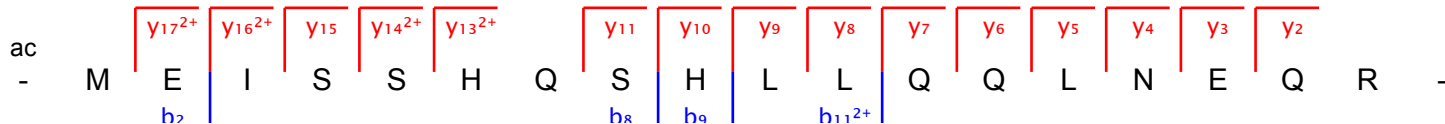

| Raw file                           | Scan  | Method   | Score  | m/z    | Gene names |
|------------------------------------|-------|----------|--------|--------|------------|
| 20140918_fract21_dyn_5ul_F5_01_389 | 24342 | TOF; CID | 109.11 | 486.29 | LGI1       |

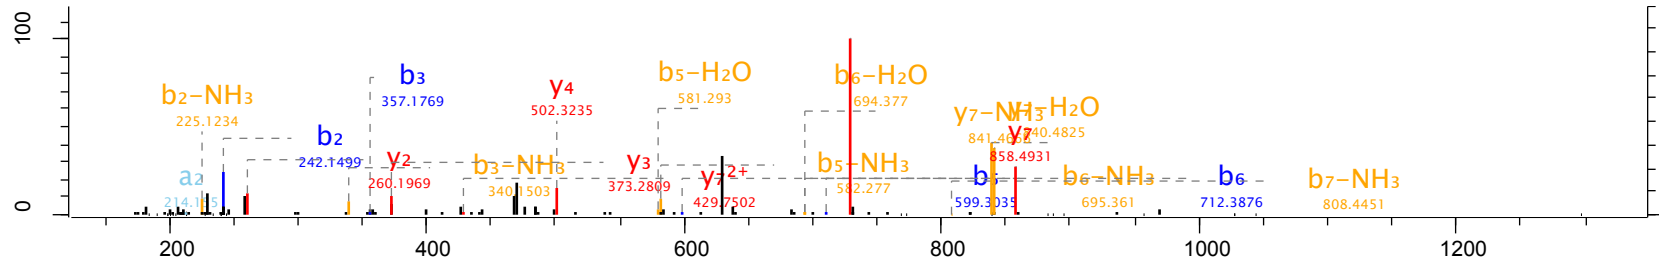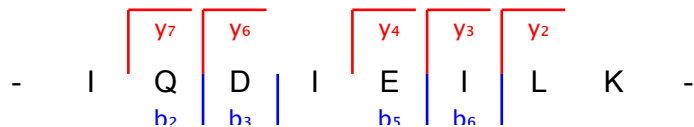

Raw file

Scan

Method

Score

m/z

Gene names

20140918\_fract21\_dyn\_5ul\_F5\_01\_389

24816

TOF; CID

43.76

501.6

HEMK1

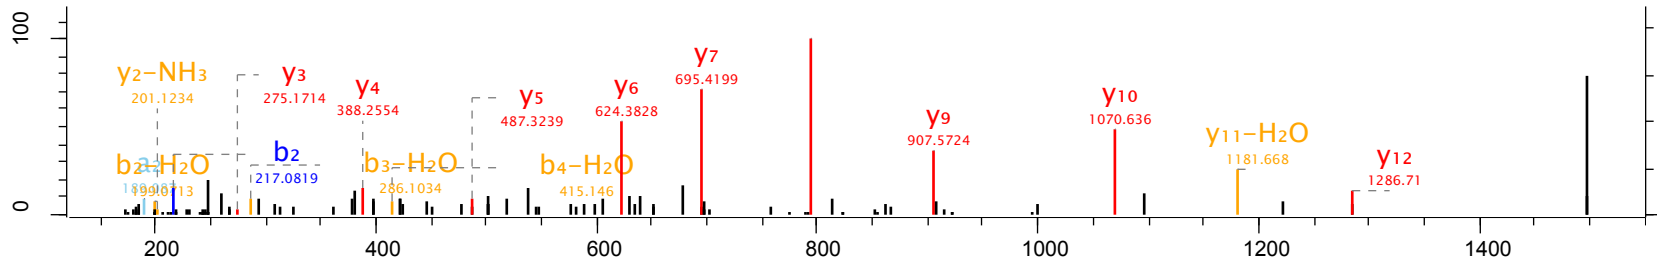

- E S S E Y I V A H V L G A K -

b<sub>2</sub>

y<sub>12</sub>

y<sub>10</sub>

y<sub>9</sub>

y<sub>8</sub>

y<sub>7</sub>

y<sub>6</sub>

y<sub>5</sub>

y<sub>4</sub>

y<sub>3</sub>

Raw file

Scan

Method

Score

m/z

Gene names

20140918\_fract21\_dyn\_5ul\_F5\_01\_389

27728

TOF; CID

117.93

731.88

SNAPC5

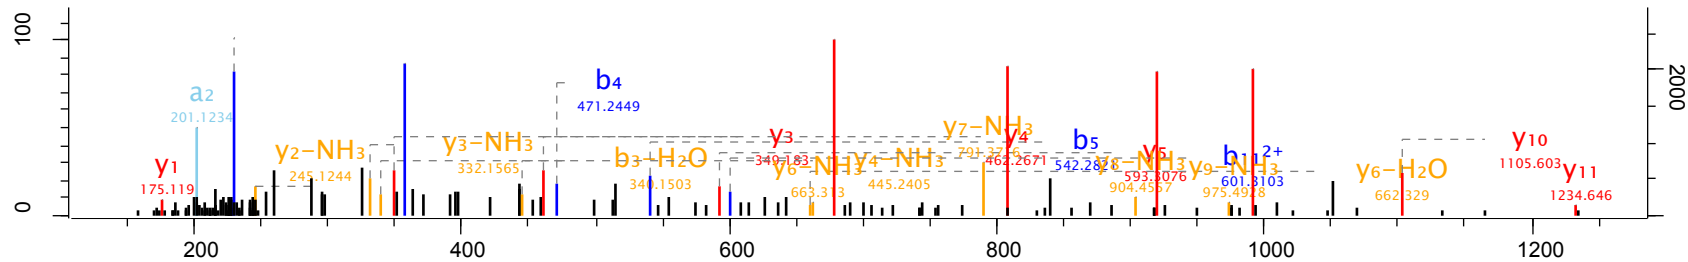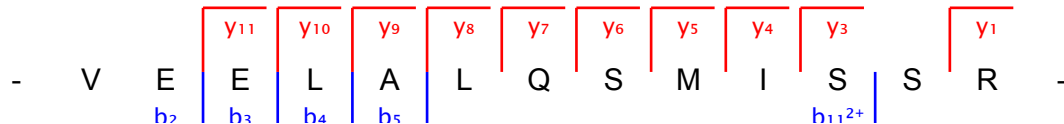

Raw file

20140918\_fract22\_dyn\_5ul\_F6\_01\_390

Scan

12436

Method

TOF; CID

Score

115.29

m/z

608.33

Gene names

TRAF5

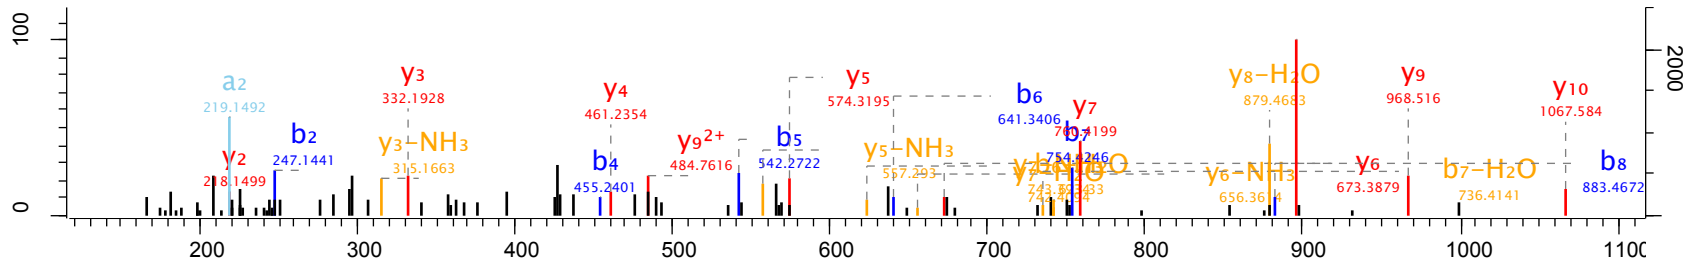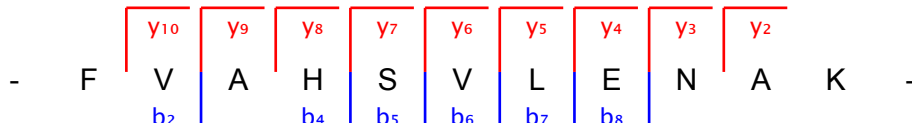

Raw file

20140918\_fract22\_dyn\_5ul\_F6\_01\_390

Scan

12713

Method

TOF; CID

Score

54.95

m/z

604.31

Gene names

HORMAD1

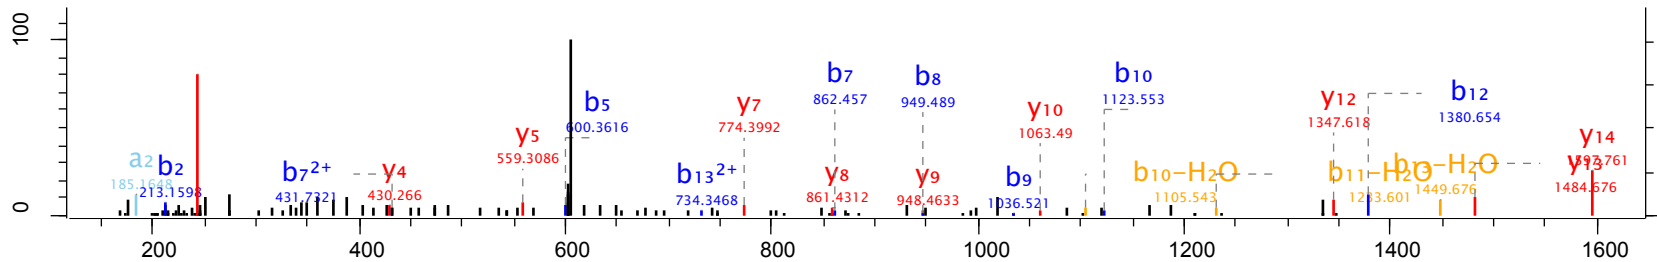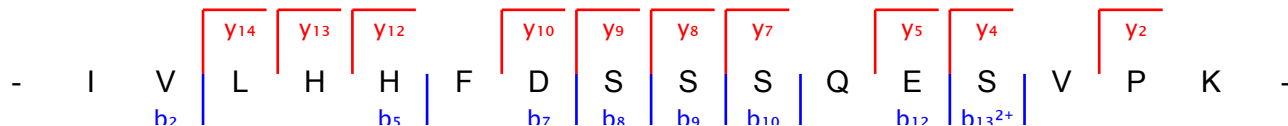

Raw file

20140918\_fract22\_dyn\_5ul\_F6\_01\_390

Scan

13537

Method

TOF; CID

Score

70.94

m/z

496.77

Gene names

NPTXR

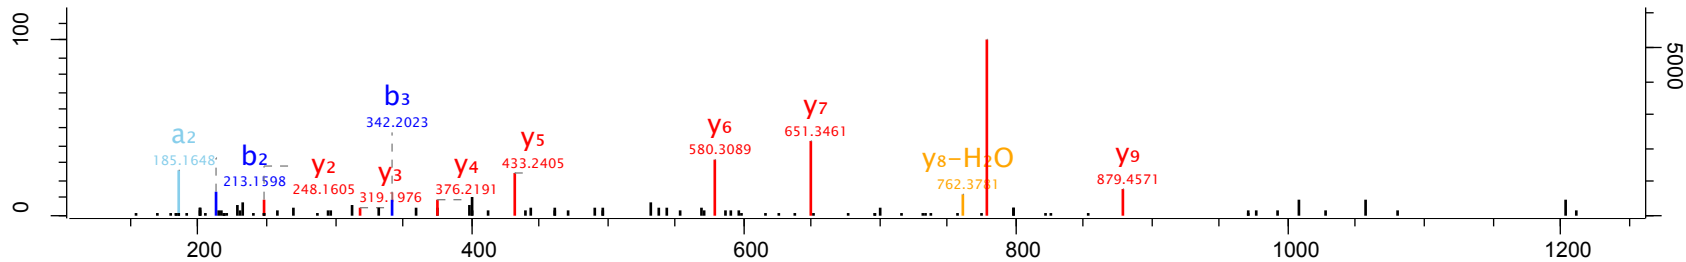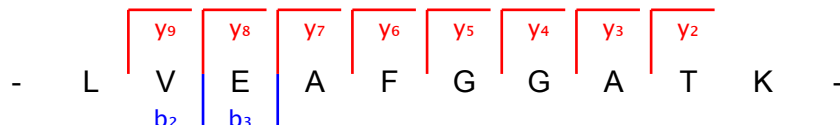

Raw file

20140918\_fract22\_dyn\_5ul\_F6\_01\_390

Scan

20955

Method

TOF; CID

Score

73.93

m/z

491.6

Gene names

ZNF121

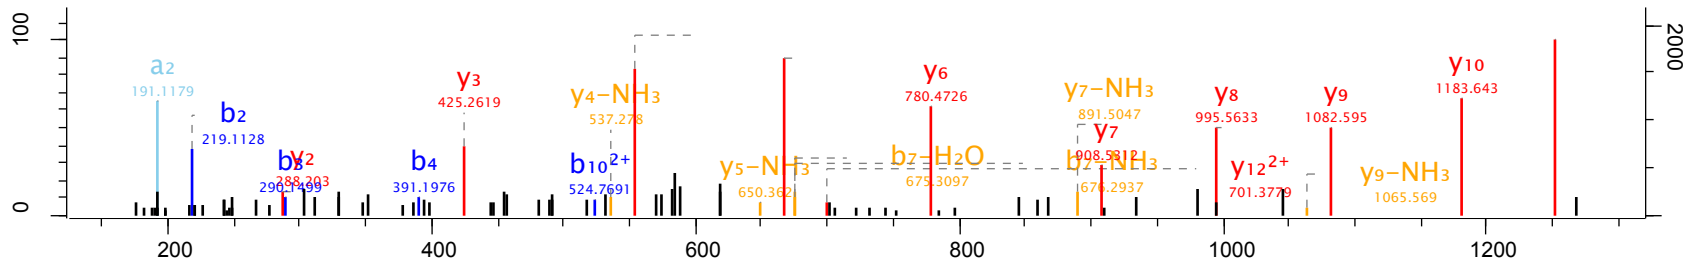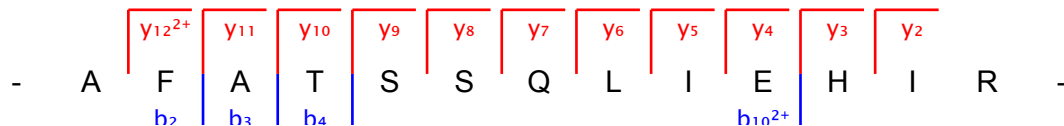



Raw file

20140918\_fract22\_dyn\_5ul\_F6\_01\_390

Scan

21998

Method

TOF; CID

Score

90.79

m/z

509.28

Gene names

NLK

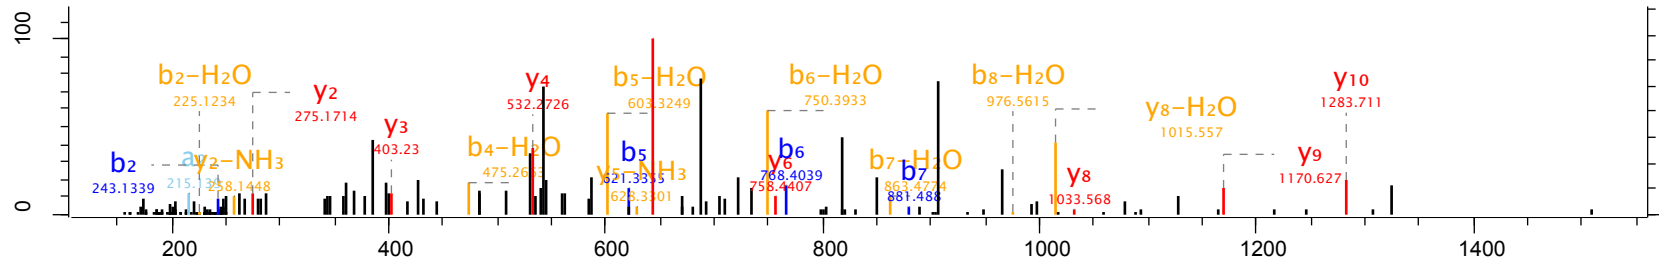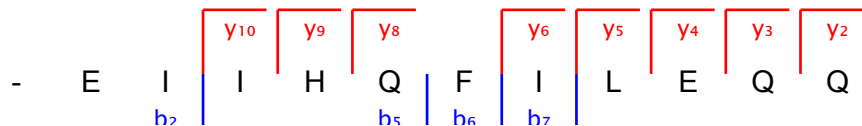

Raw file

20140918\_fract22\_dyn\_5ul\_F6\_01\_390

Scan

22556

Method

TOF; CID

Score

84.38

m/z

1101.48

Gene names

ELOF1

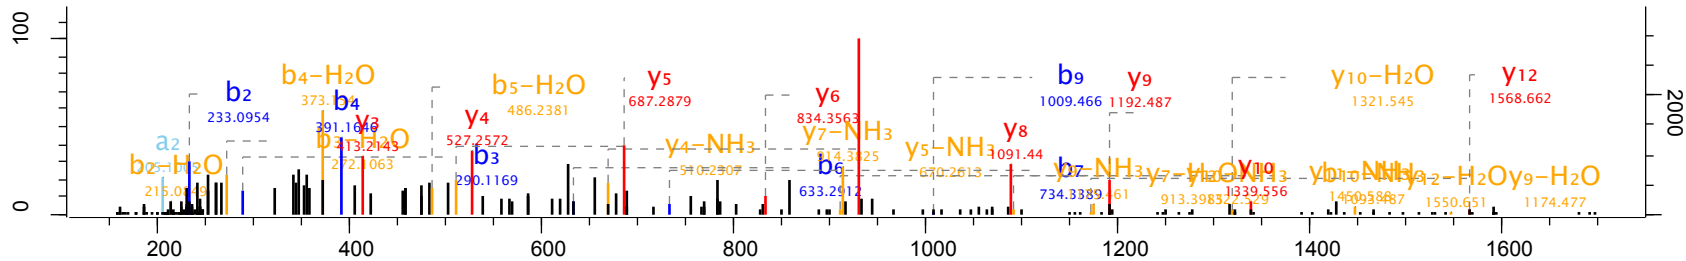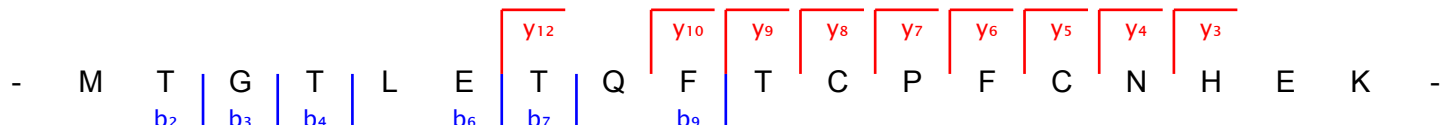

| Raw file                           | Scan  | Method   | Score | m/z    | Gene names |
|------------------------------------|-------|----------|-------|--------|------------|
| 20140918_fract22_dyn_5ul_F6_01_390 | 28205 | TOF; CID | 43.26 | 654.34 | NATD1      |

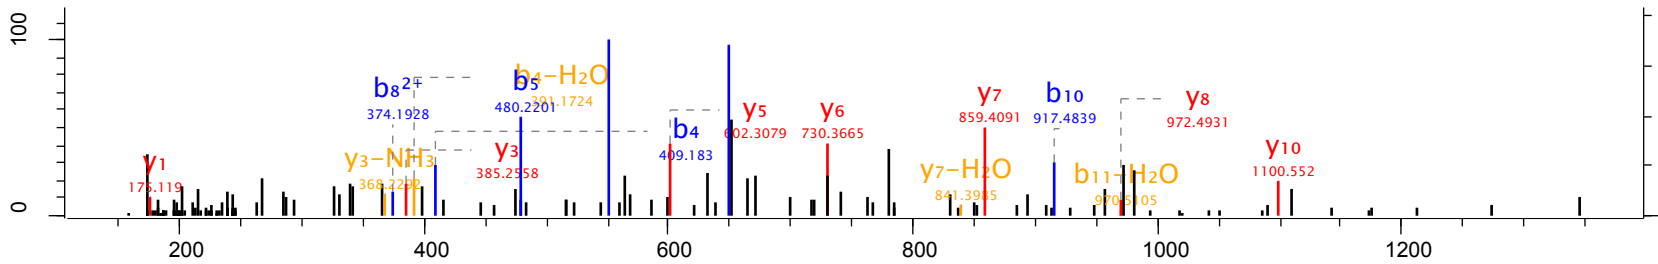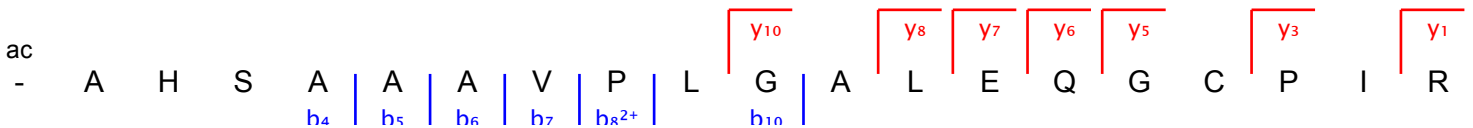

| Raw file                           | Scan  | Method   | Score | m/z   | Gene names |
|------------------------------------|-------|----------|-------|-------|------------|
| 20140918_fract22_dyn_5ul_F6_01_390 | 29716 | TOF; CID | 97.46 | 751.4 | NFYB       |

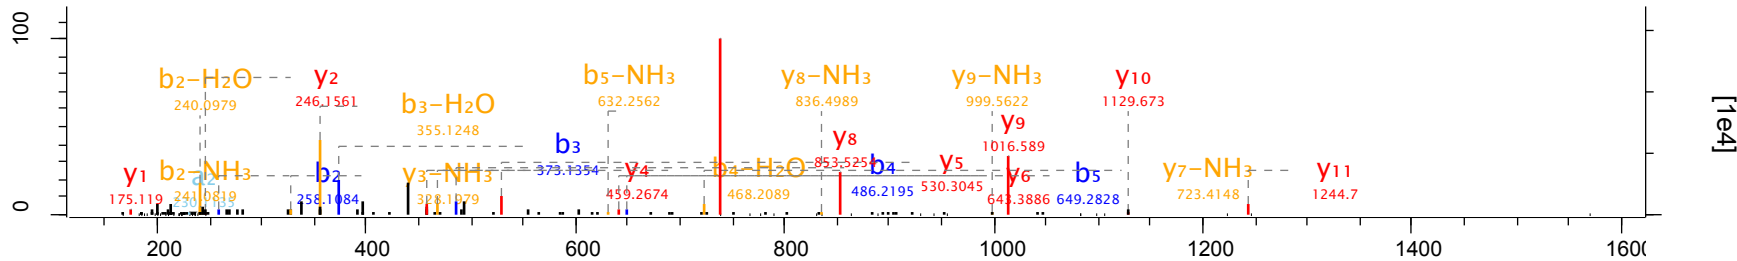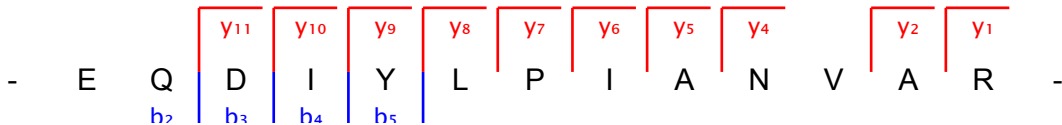

| Raw file                           | Scan  | Method   | Score  | m/z   | Gene names |
|------------------------------------|-------|----------|--------|-------|------------|
| 20140918_fract22_dyn_5ul_F6_01_390 | 32616 | TOF; CID | 102.52 | 813.9 | TSPAN1     |

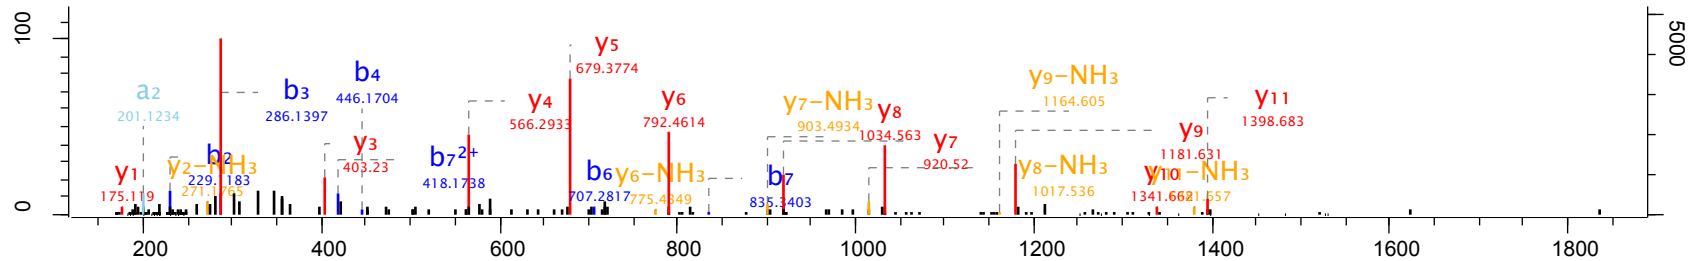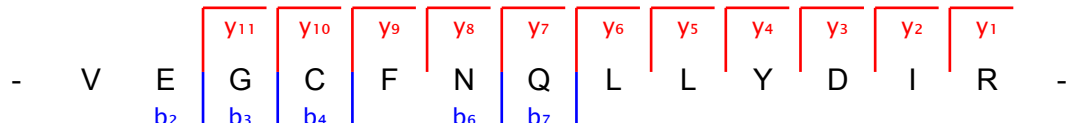

Raw file

20140918\_fract22\_dyn\_5ul\_F6\_01\_390

Scan

32988

Method

TOF; CID

Score

103.9

m/z

1191.07

Gene names

BTBD3

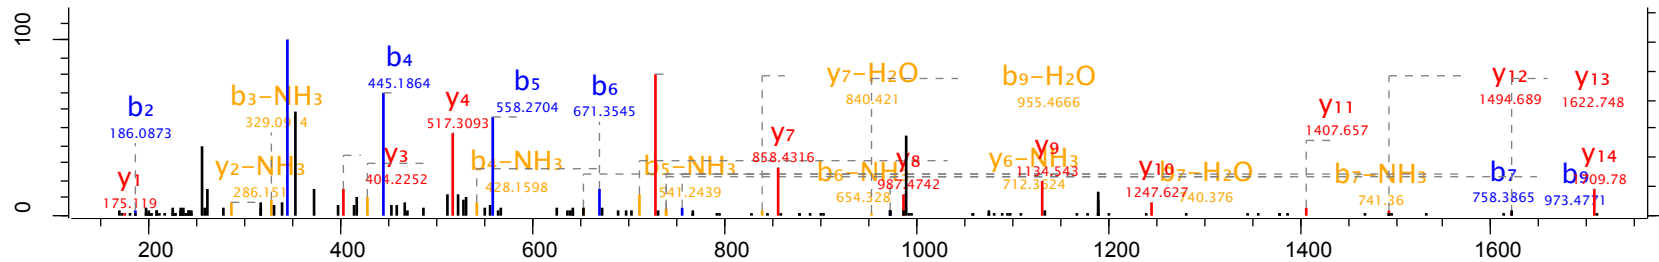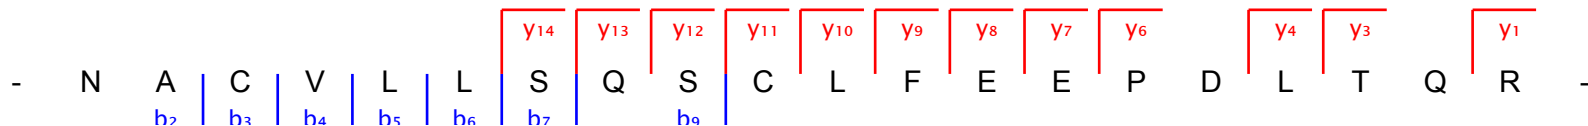

Raw file

Scan

Method

Score

m/z

Gene names

20140918\_fract22\_dyn\_5ul\_F6\_01\_390

33263

TOF; CID

95.41

1162.62

PAQR7

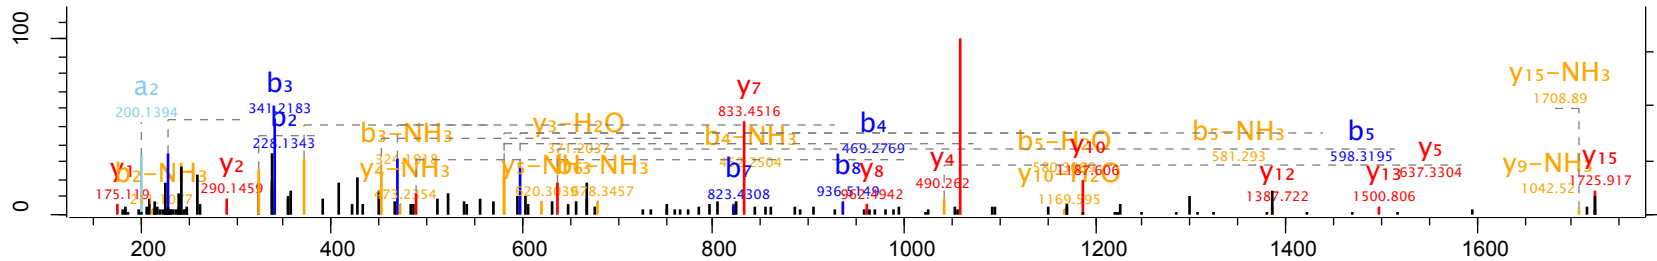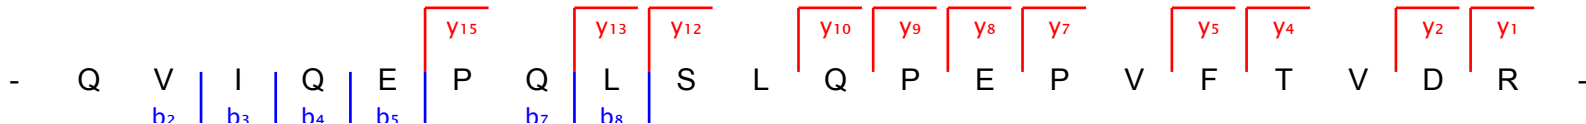

Raw file

20140918\_fract22\_dyn\_5ul\_F6\_01\_390

Scan

33578

Method

TOF; CID

Score

105.35

m/z

1123.84

Gene names

NABP2

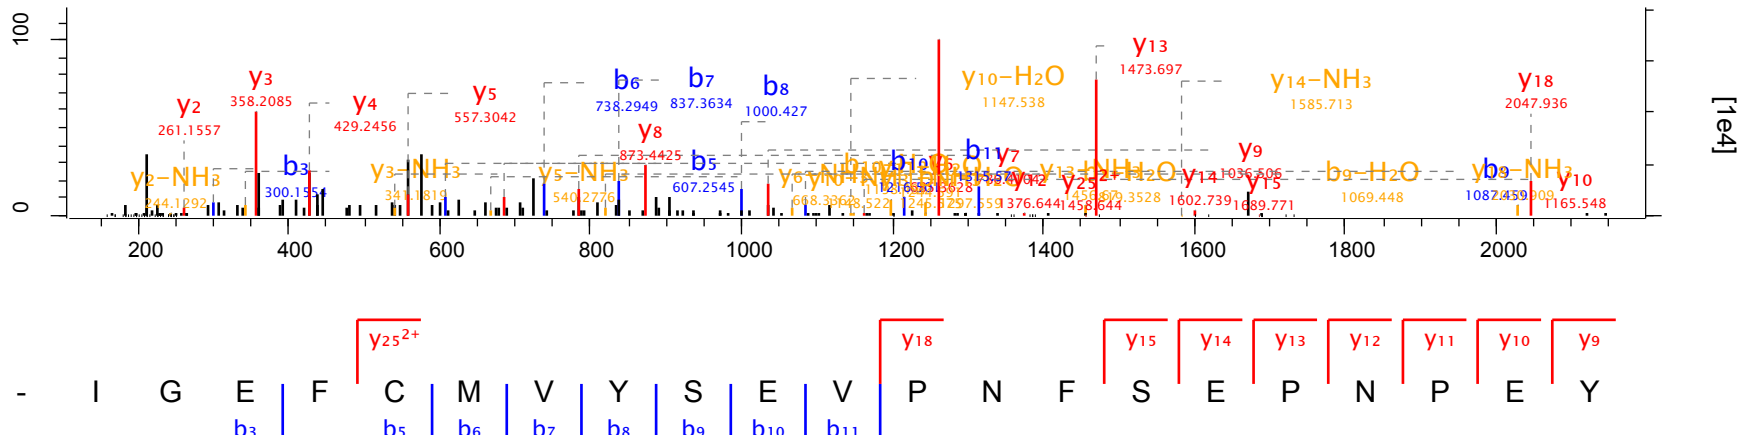



Raw file

20140918\_fract23\_dyn\_5ul\_F7\_01\_391

Scan

Method

Score

m/z

Gene names

9225

TOF; CID

46.88

473.23

ZSCAN32

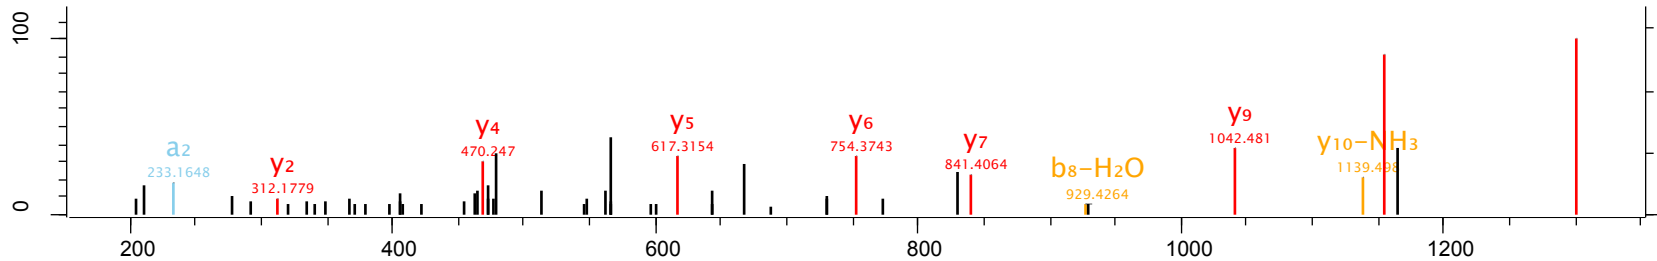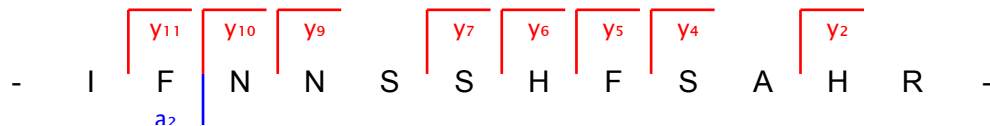

Raw file

20140918\_fract23\_dyn\_5ul\_F7\_01\_391

Scan

12980

Method

TOF; CID

Score

111.04

m/z

452.74

Gene names

HSD17B13

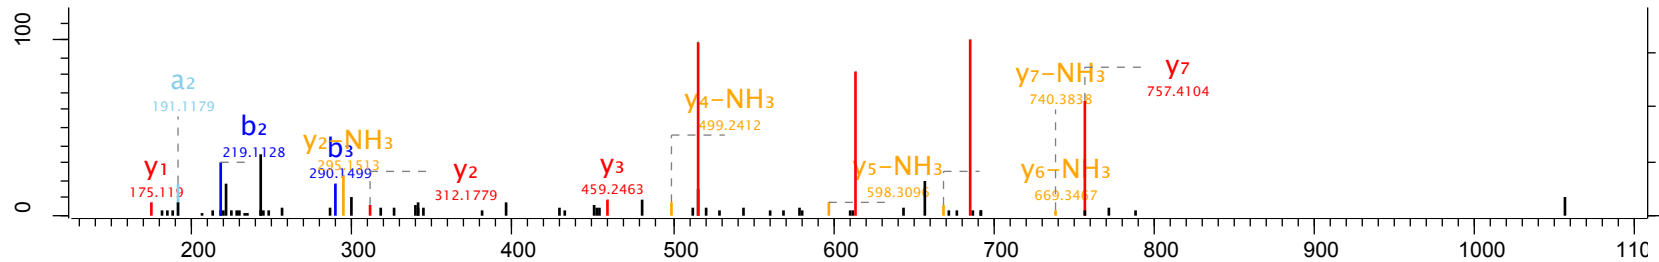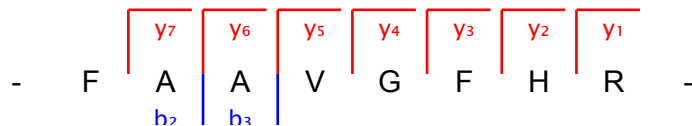

| Raw file                           | Scan  | Method   | Score | m/z    | Gene names |
|------------------------------------|-------|----------|-------|--------|------------|
| 20140918_fract23_dyn_5ul_F7_01_391 | 14436 | TOF; CID | 96.74 | 625.86 | FKRP       |

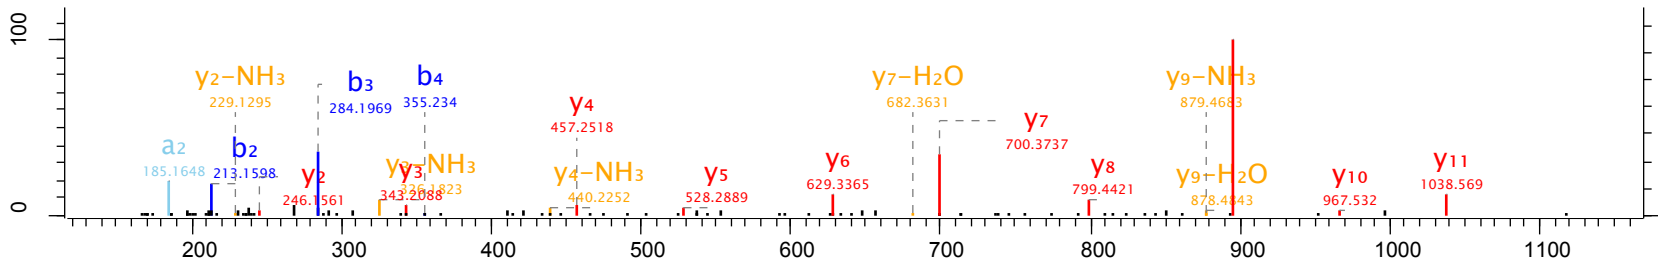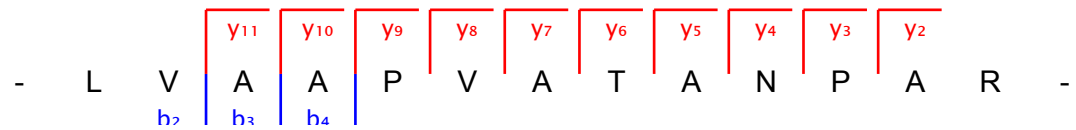

| Raw file                           | Scan  | Method   | Score  | m/z    | Gene names |
|------------------------------------|-------|----------|--------|--------|------------|
| 20140918_fract23_dyn_5ul_F7_01_391 | 14601 | TOF; CID | 147.26 | 654.82 | KCNK1      |

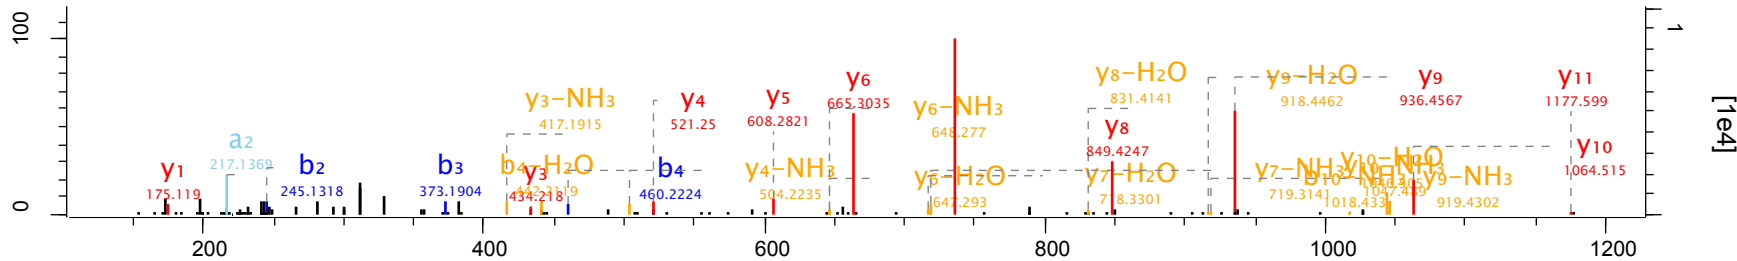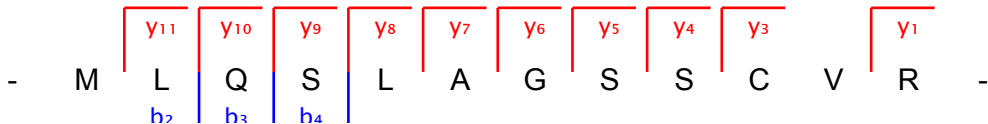

| Raw file                           | Scan  | Method   | Score | m/z    | Gene names |
|------------------------------------|-------|----------|-------|--------|------------|
| 20140918_fract23_dyn_5ul_F7_01_391 | 16629 | TOF; CID | 84.51 | 569.32 | ZNF219     |

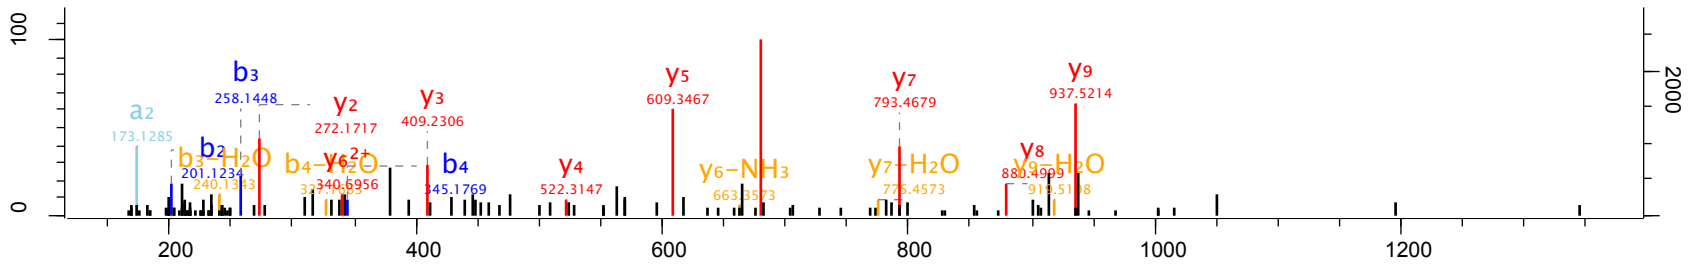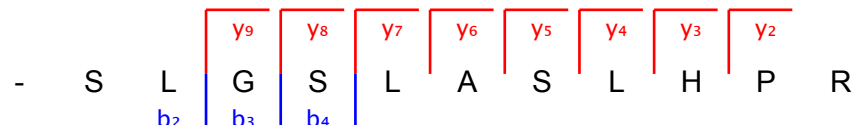

Raw file

20140918\_fract23\_dyn\_5ul\_F7\_01\_391

Scan

18077

Method

TOF; CID

Score

76.07

m/z

734.85

Gene names

STYXL1

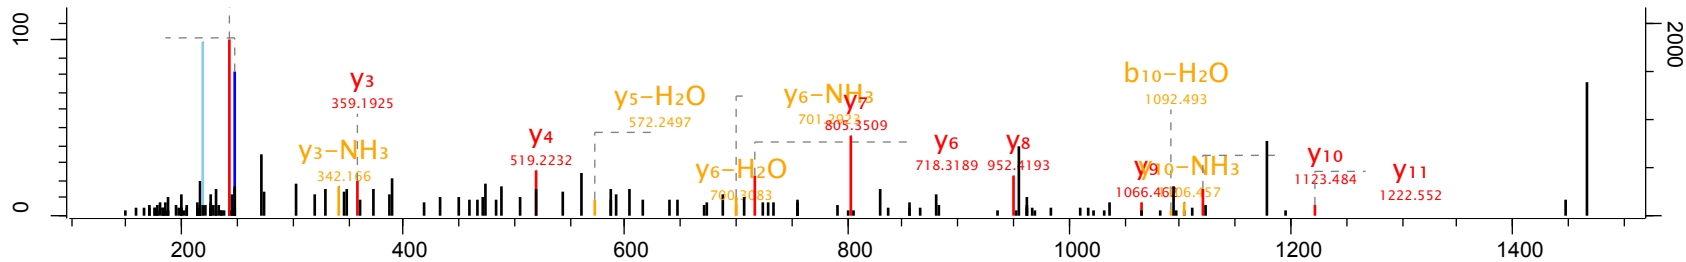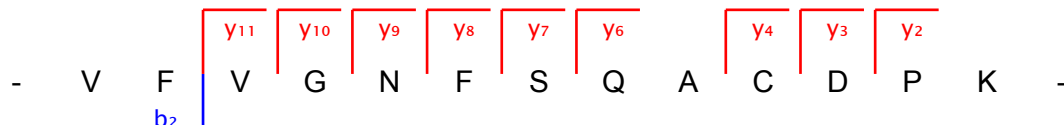

Raw file

Scan

Method

Score

m/z

Gene names

20140918\_fract23\_dyn\_5ul\_F7\_01\_391

18445

TOF; CID

119.39

672.33

XK

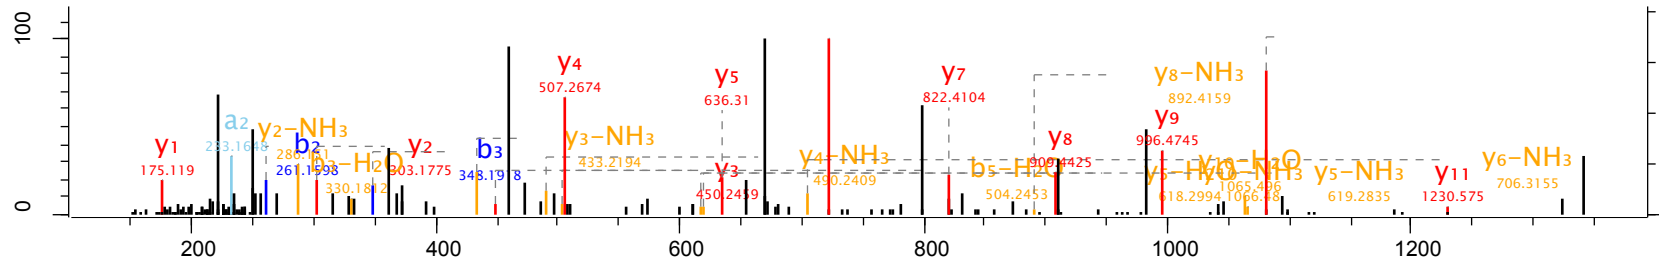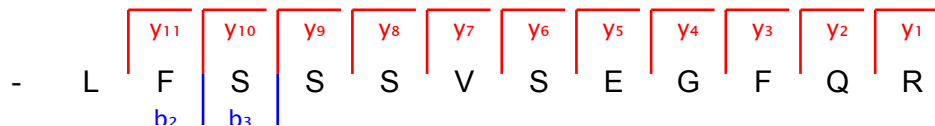

Raw file

20140918\_fract23\_dyn\_5ul\_F7\_01\_391

Scan

18516

Method

TOF; CID

Score

69.09

m/z

599.3

Gene names

C9orf9

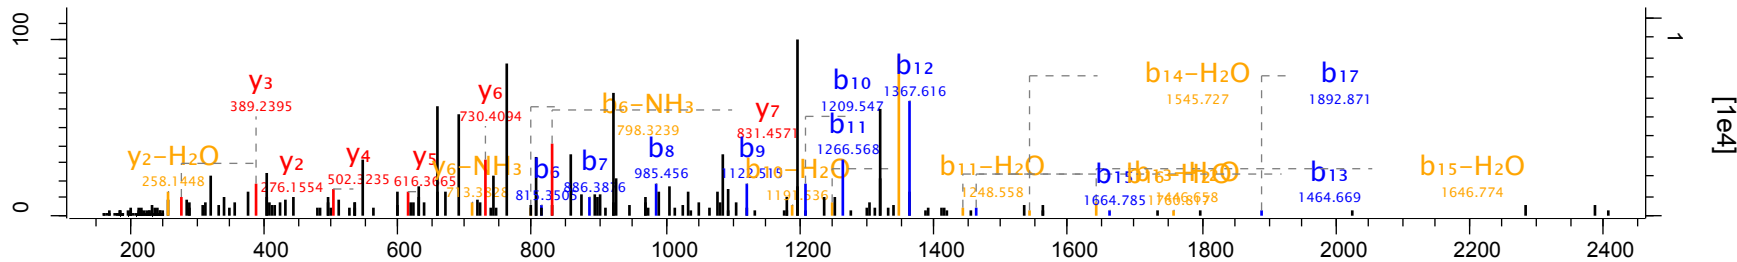

- L C Q H F E A V H S G T P V T N N L L E K

b<sub>6</sub> | b<sub>7</sub> | b<sub>8</sub> | b<sub>9</sub> | b<sub>10</sub> | b<sub>11</sub> | b<sub>12</sub> | b<sub>13</sub> | b<sub>15</sub> | b<sub>17</sub>

y<sub>7</sub> | y<sub>6</sub> | y<sub>5</sub> | y<sub>4</sub> | y<sub>3</sub> | y<sub>2</sub>



Raw file

20140918\_fract23\_dyn\_5ul\_F7\_01\_391

Scan

19632

Method

TOF; CID

Score

90.76

m/z

670.38

Gene names

FAM178A

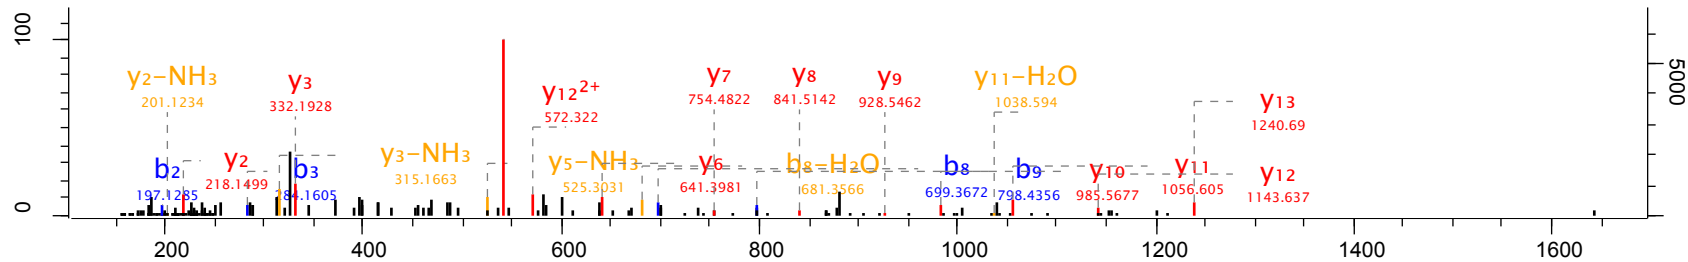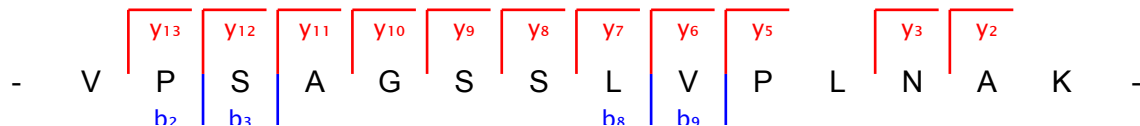

Raw file

20140918\_fract23\_dyn\_5ul\_F7\_01\_391

Scan

20512

Method

TOF; CID

Score

63.62

m/z

657.84

Gene names

EVA1C

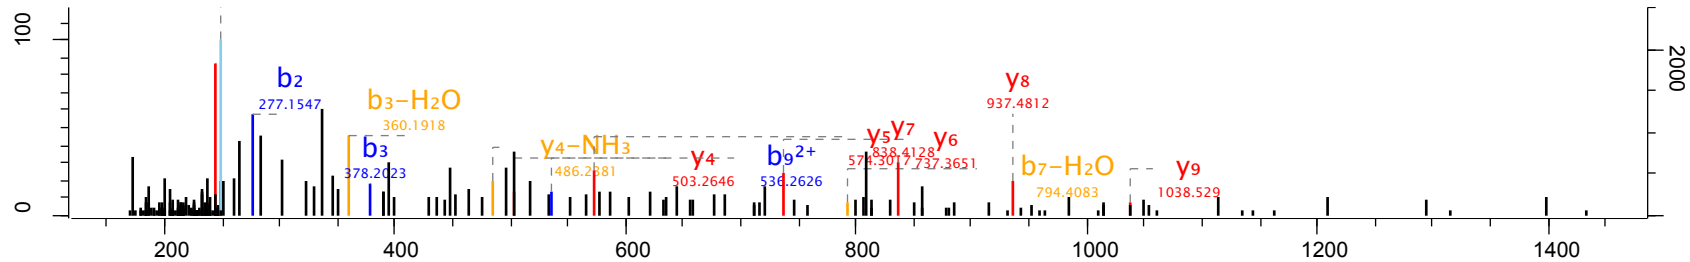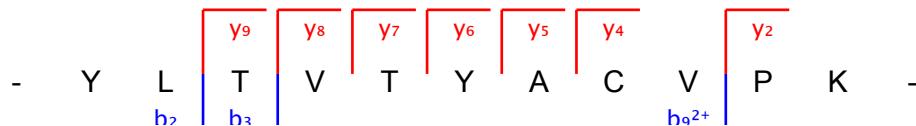

Raw file

20140918\_fract23\_dyn\_5ul\_F7\_01\_391

Scan

22685

Method

TOF; CID

Score

117.03

m/z

849.38

Gene names

PLP2

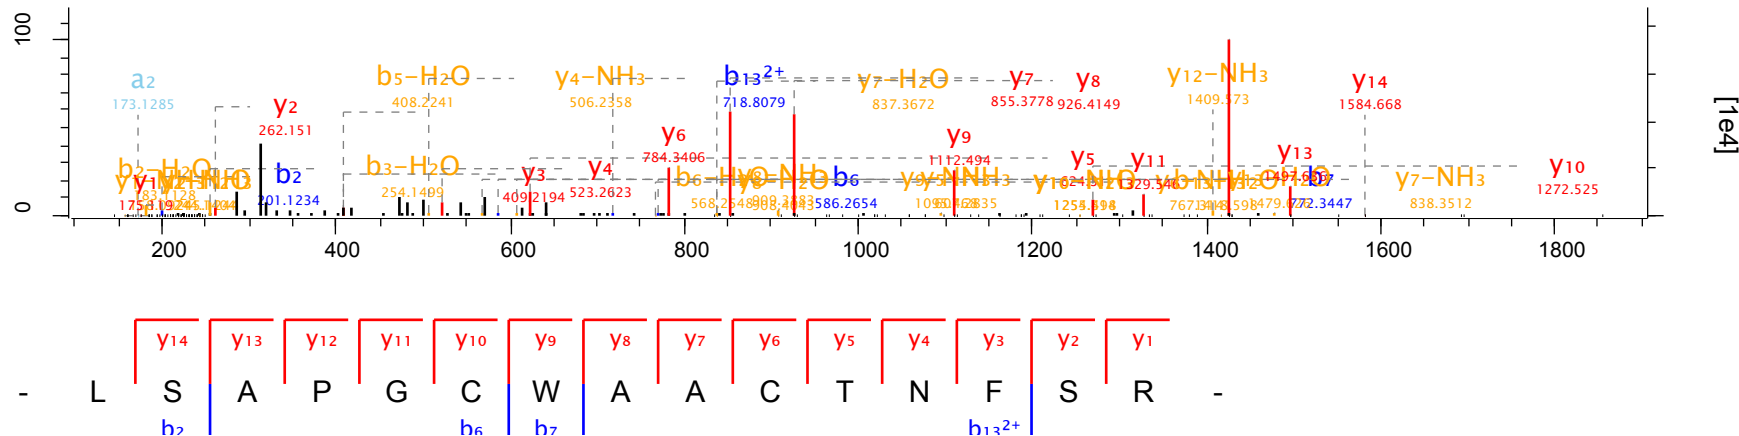

Raw file

20140918\_fract23\_dyn\_5ul\_F7\_01\_391

Scan

22745

Method

TOF; CID

Score

113.24

m/z

518.28

Gene names

PAR3B

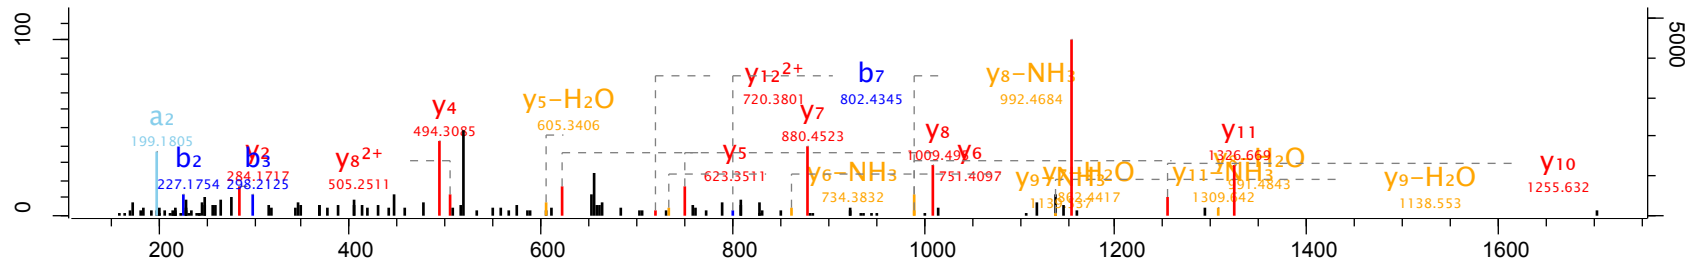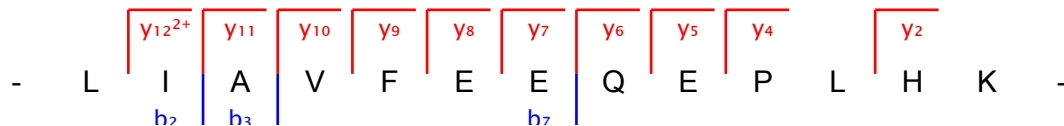

| Raw file                           | Scan  | Method   | Score | m/z    | Gene names |
|------------------------------------|-------|----------|-------|--------|------------|
| 20140918_fract23_dyn_5ul_F7_01_391 | 25240 | TOF; CID | 61.11 | 460.93 | ANKRA2     |

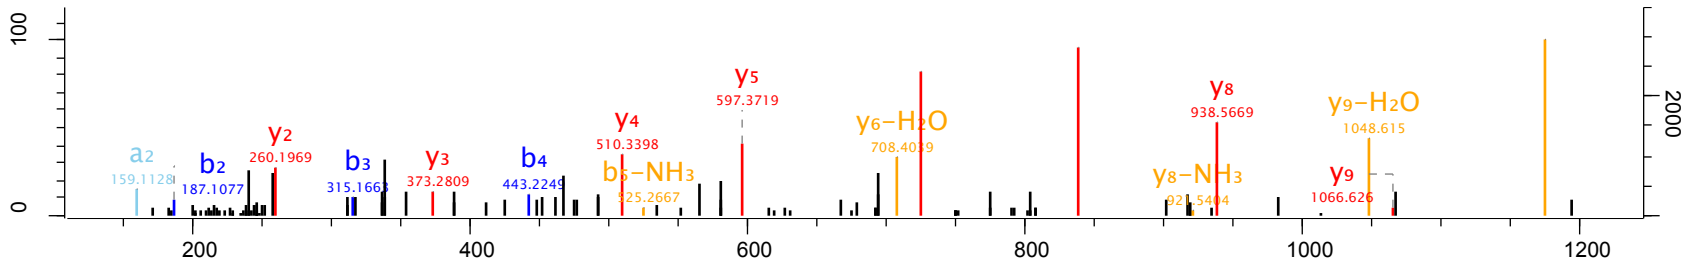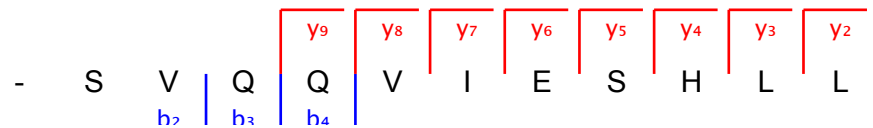

| Raw file                           | Scan  | Method   | Score | m/z    | Gene names |
|------------------------------------|-------|----------|-------|--------|------------|
| 20140918_fract23_dyn_5ul_F7_01_391 | 25691 | TOF; CID | 32.51 | 754.85 | INO80D     |

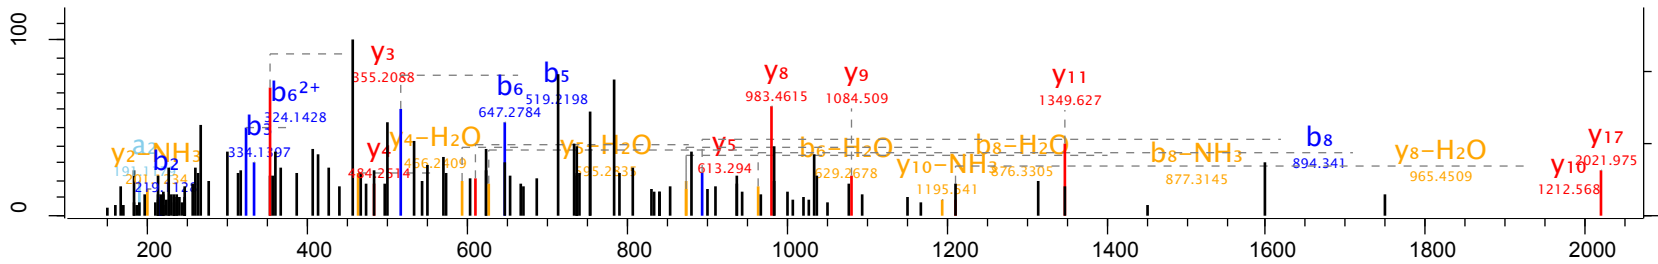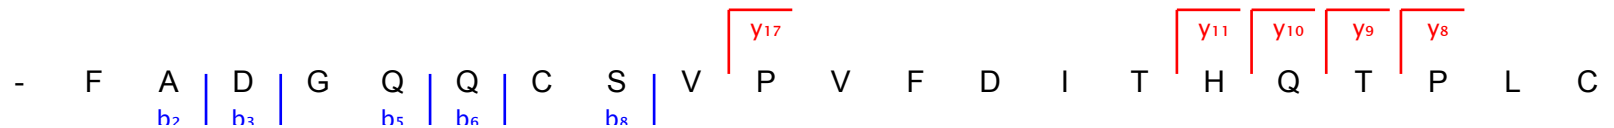

Raw file

20140918\_fract23\_dyn\_5ul\_F7\_01\_391

Scan

26852

Method

TOF; CID

Score

81.68

m/z

710.89

Gene names

NFE2L1

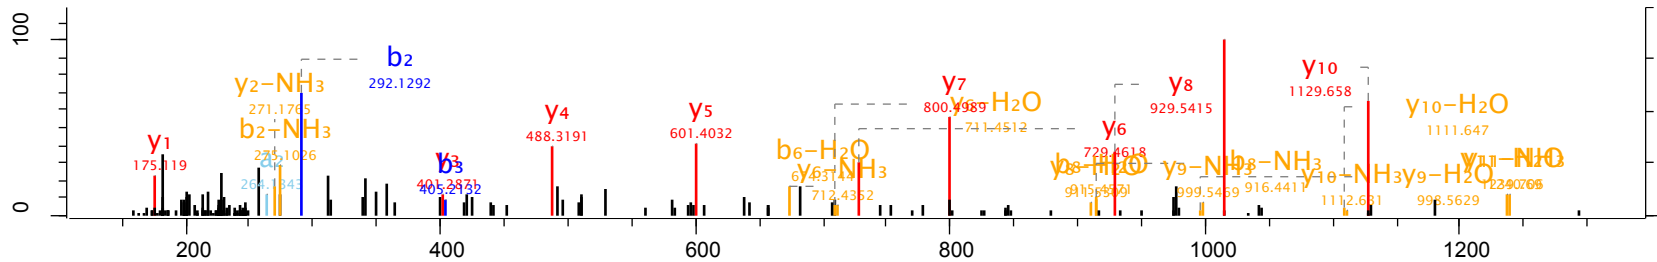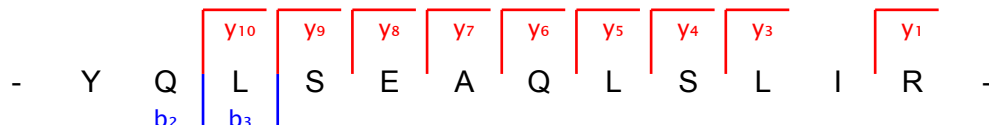

Raw file

20140918\_fract23\_dyn\_5ul\_F7\_01\_391

Scan

27715

Method

TOF; CID

Score

125.23

m/z

948.52

Gene names

ITM2C

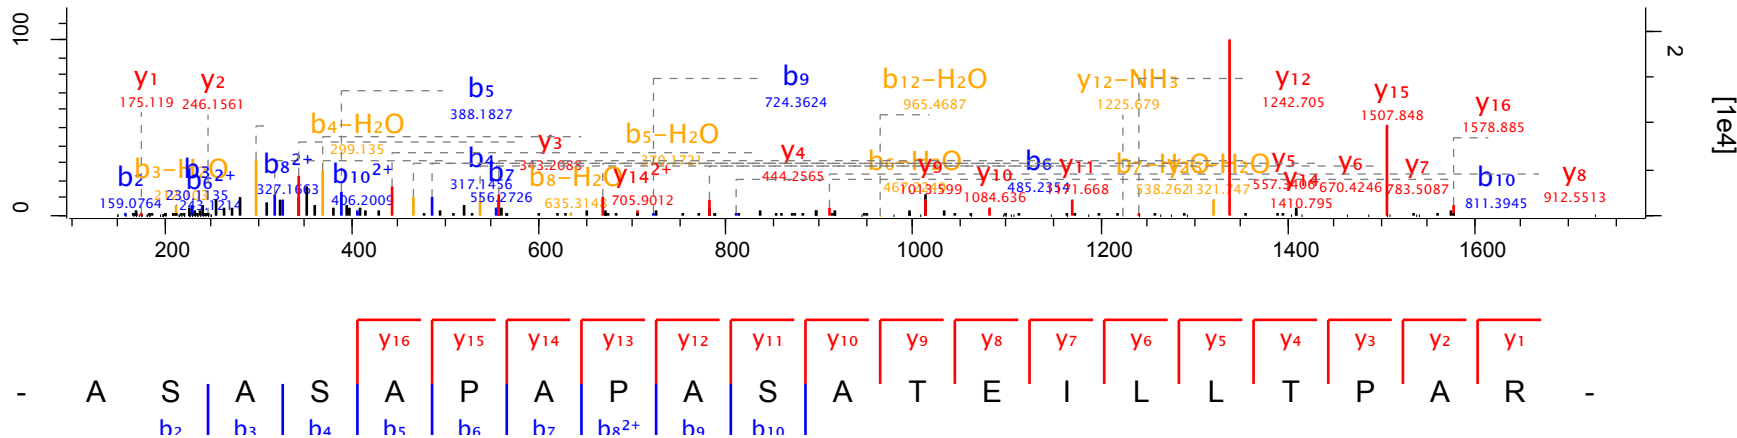



Raw file

20140918\_fract23\_dyn\_5ul\_F7\_01\_391

Scan

30129

Method

TOF; CID

Score

69.7

m/z

908.73

Gene names

TSPAN4

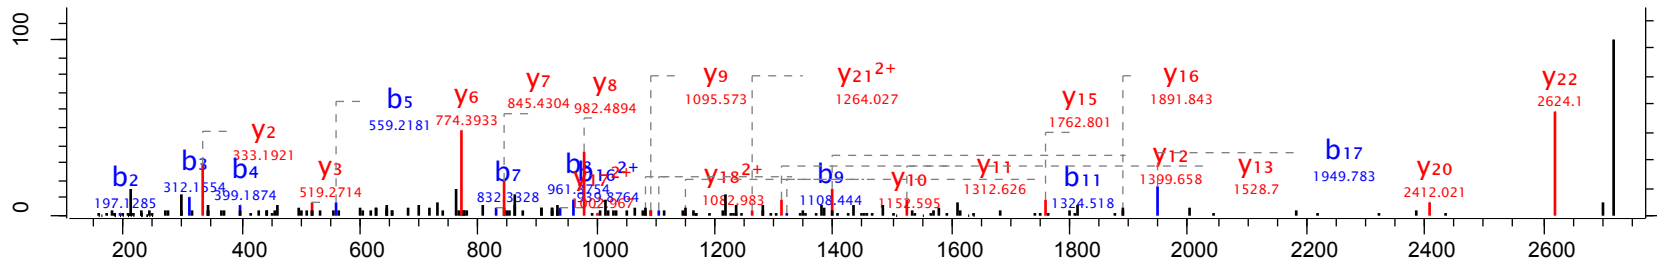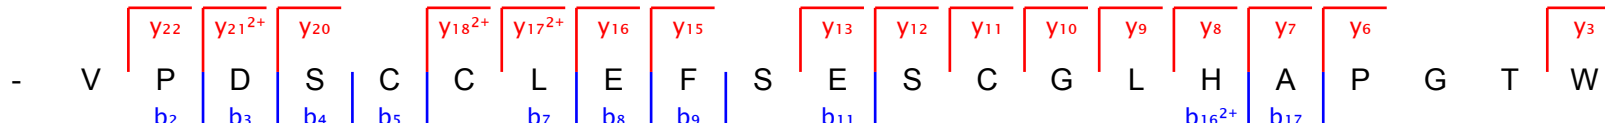

Raw file

20140918\_fract23\_dyn\_5ul\_F7\_01\_391

Scan

33281

Method

TOF; CID

Score

109.1

m/z

928.51

Gene names

PET117

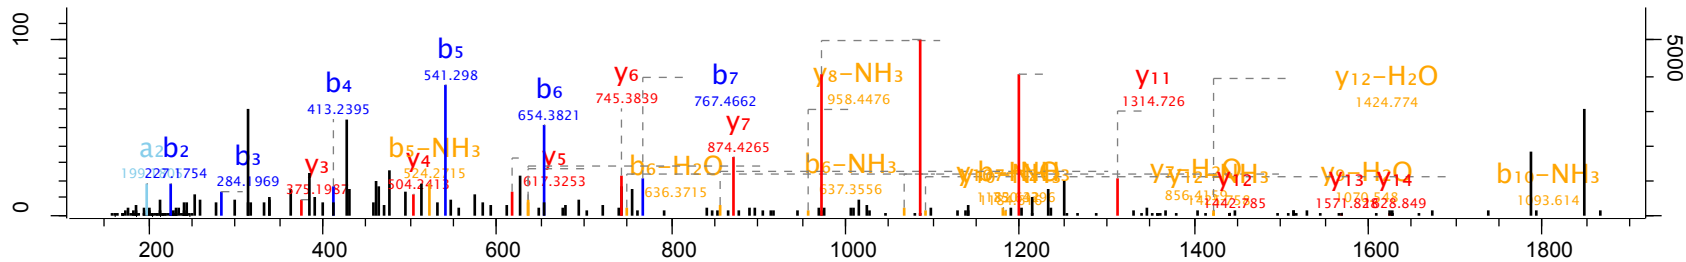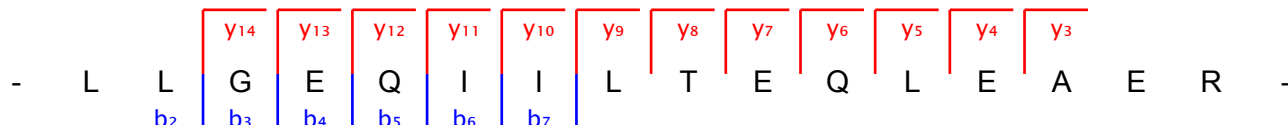

Raw file

Scan

Method

Score

m/z

Gene names

20140918\_fract23\_dyn\_5ul\_F7\_01\_391

33865

TOF; CID

99.4

961.13

SFT2D1

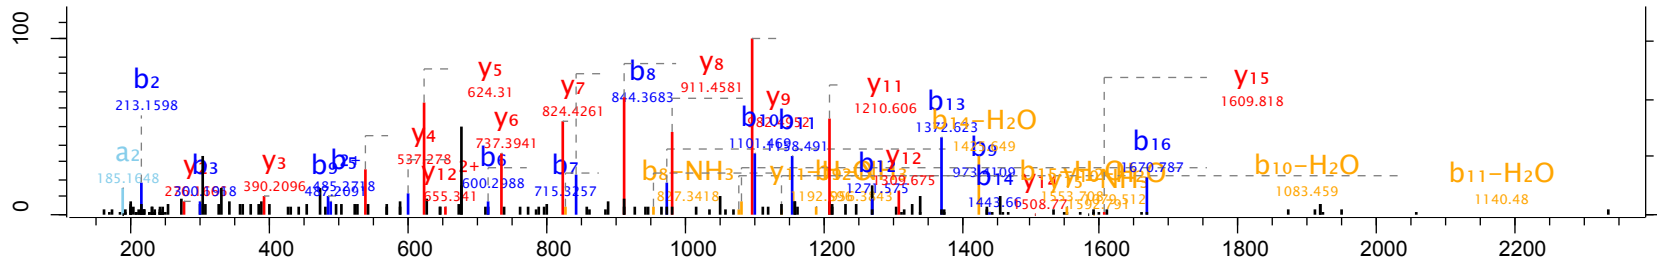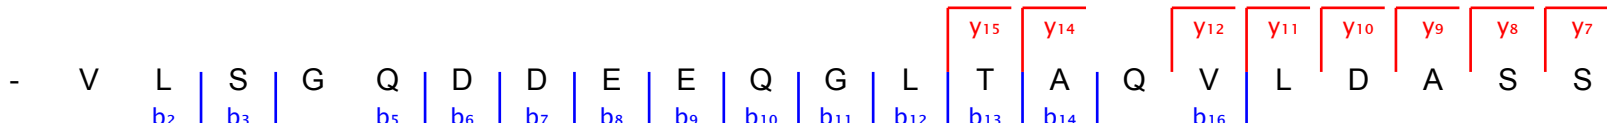

Raw file

20140918\_fract23\_dyn\_5ul\_F7\_01\_391

Scan

34833

Method

TOF; CID

Score

122.74

m/z

491.24

Gene names

TMEM50B

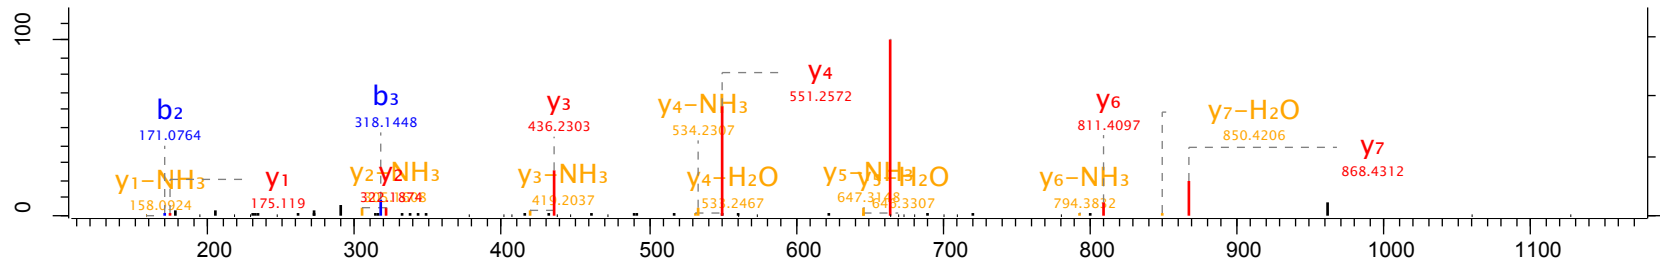

[1e4]

ac

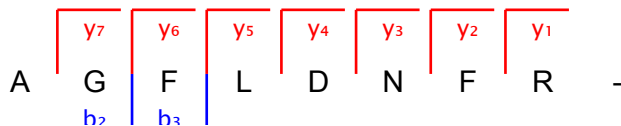

| Raw file                           | Scan  | Method   | Score | m/z    | Gene names |
|------------------------------------|-------|----------|-------|--------|------------|
| 20140918_fract23_dyn_5ul_F7_01_391 | 35008 | TOF; CID | 65.24 | 698.88 | PRKD2      |

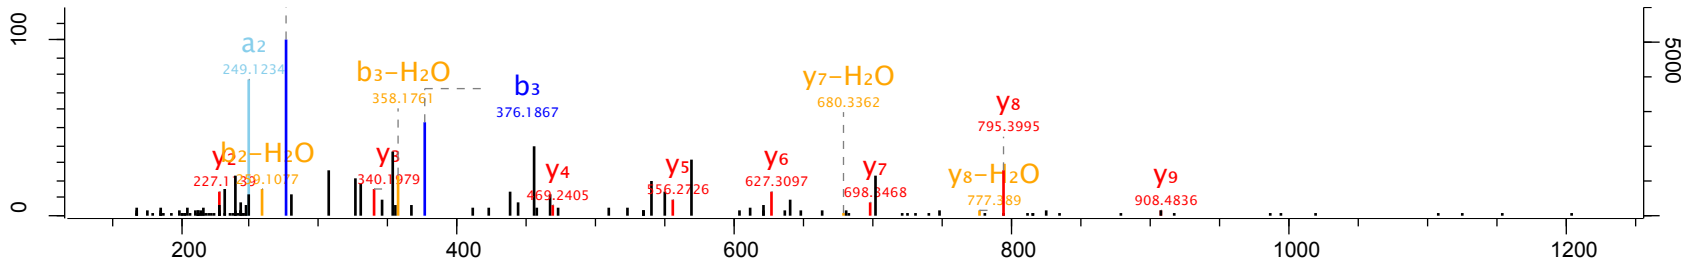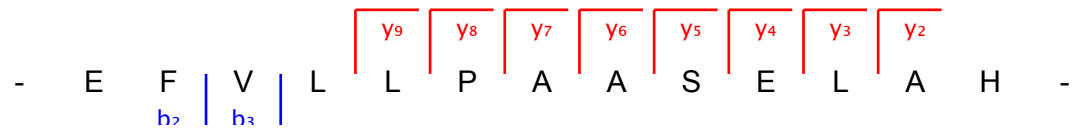

Raw file

20140918\_fract24\_dyn\_5ul\_F8\_01\_392

Scan

10309

Method

TOF; CID

Score

78.32

m/z

527.62

Gene names

ZNF34

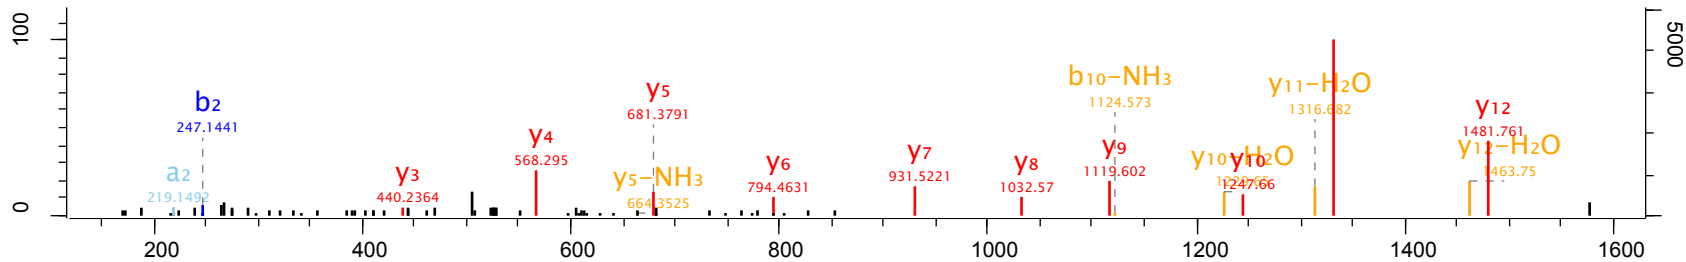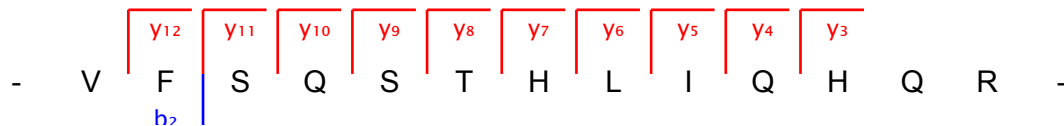

| Raw file                           | Scan  | Method   | Score | m/z    | Gene names |
|------------------------------------|-------|----------|-------|--------|------------|
| 20140918_fract24_dyn_5ul_F8_01_392 | 13618 | TOF; CID | 89.35 | 528.81 | TTC7B      |

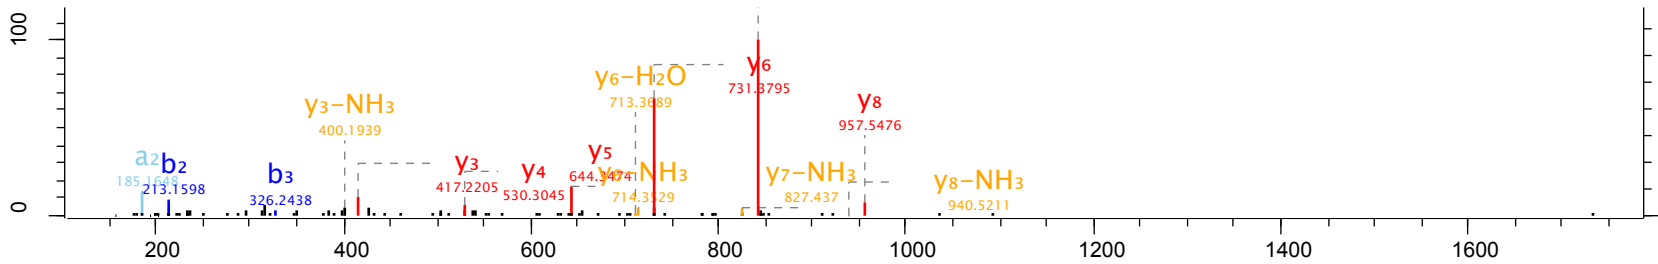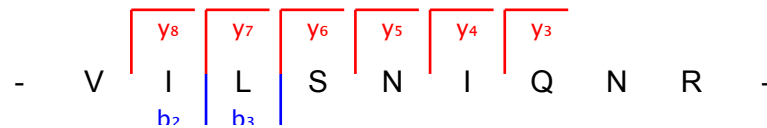

Raw file

20140918\_fract24\_dyn\_5ul\_F8\_01\_392

Scan

17669

Method

TOF; CID

Score

66.64

m/z

758.04

Gene names

UBXN2B

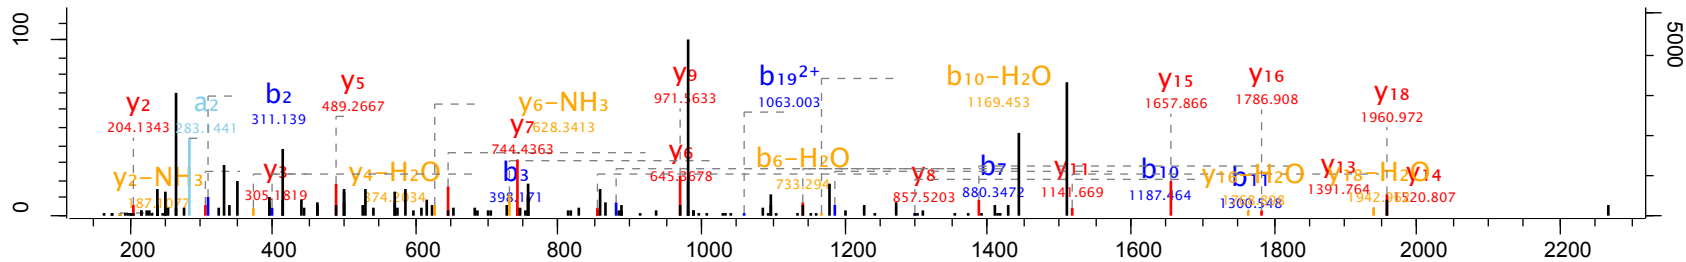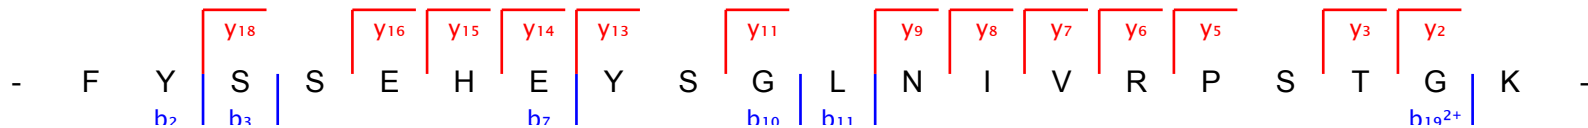



Raw file

20140918\_fract24\_dyn\_5ul\_F8\_01\_392

Scan

17720

Method

TOF; CID

Score

77.37

m/z

738.91

Gene names

F3

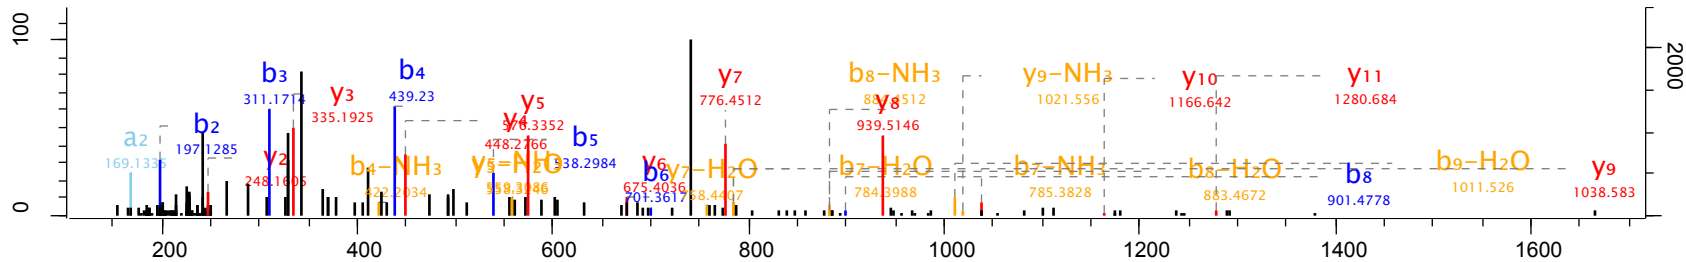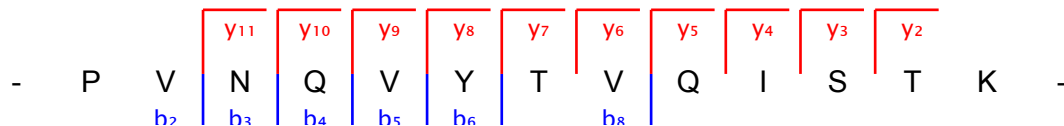

| Raw file                           | Scan  | Method   | Score | m/z    | Gene names |
|------------------------------------|-------|----------|-------|--------|------------|
| 20140918_fract24_dyn_5ul_F8_01_392 | 17863 | TOF; CID | 93.18 | 482.27 | ZDHHC16    |

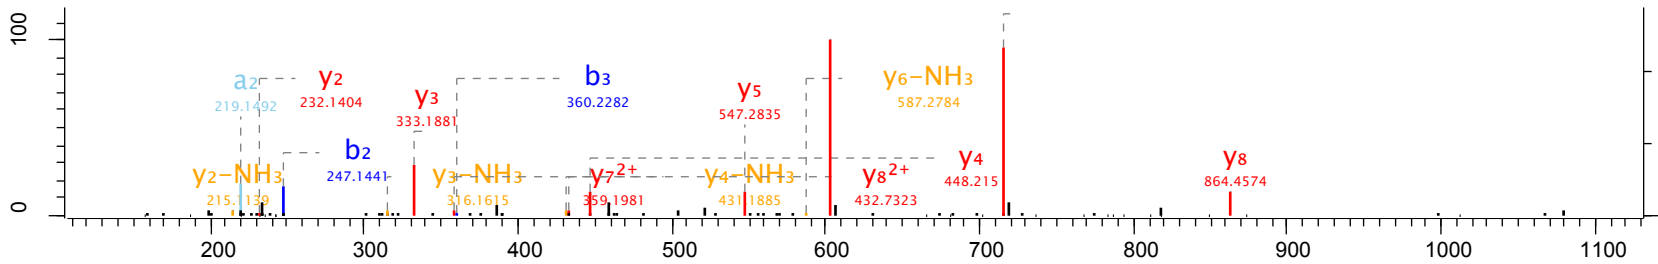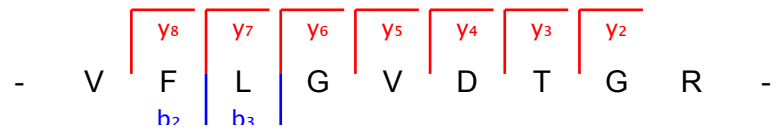

[1e4]

Raw file

20140918\_fract24\_dyn\_5ul\_F8\_01\_392

Scan

18933

Method

TOF; CID

Score

58.27

m/z

553.3

Gene names

EXPH5

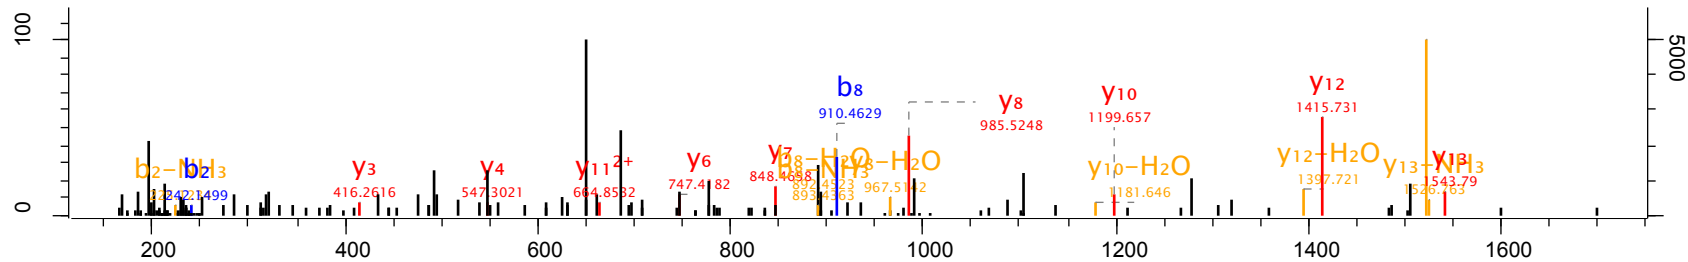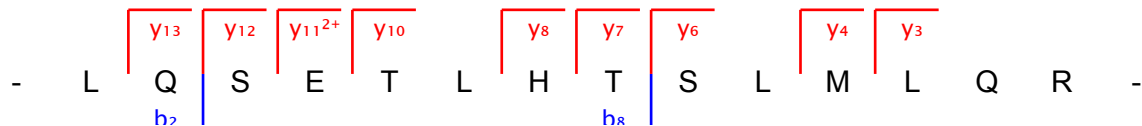

| Raw file                           | Scan  | Method   | Score | m/z    | Gene names |
|------------------------------------|-------|----------|-------|--------|------------|
| 20140918_fract24_dyn_5ul_F8_01_392 | 19046 | TOF; CID | 66.27 | 638.32 | PIGB       |

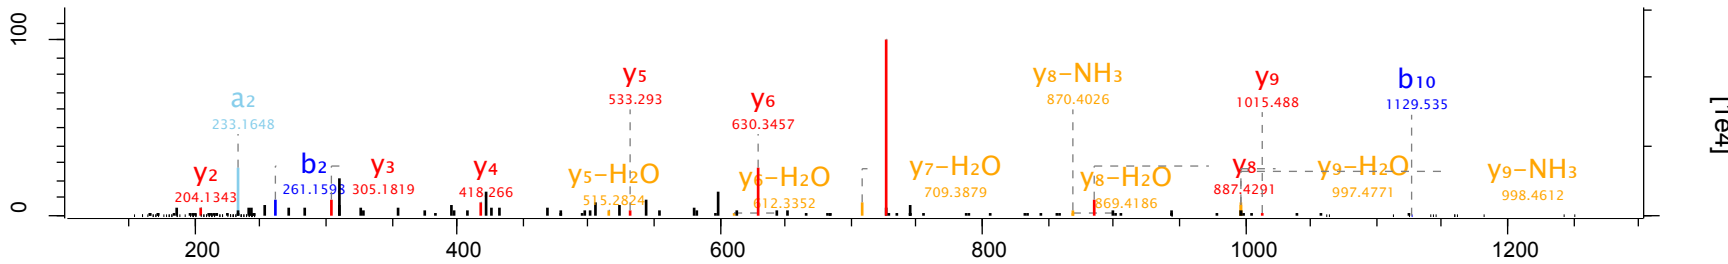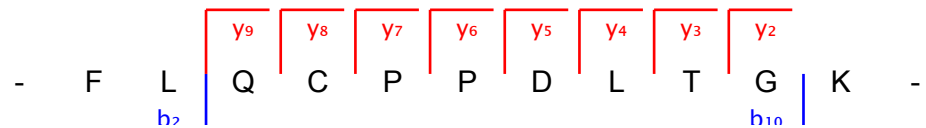

| Raw file                           | Scan  | Method   | Score | m/z    | Gene names |
|------------------------------------|-------|----------|-------|--------|------------|
| 20140918_fract24_dyn_5ul_F8_01_392 | 19146 | TOF; CID | 84.36 | 643.35 | FBXO5      |

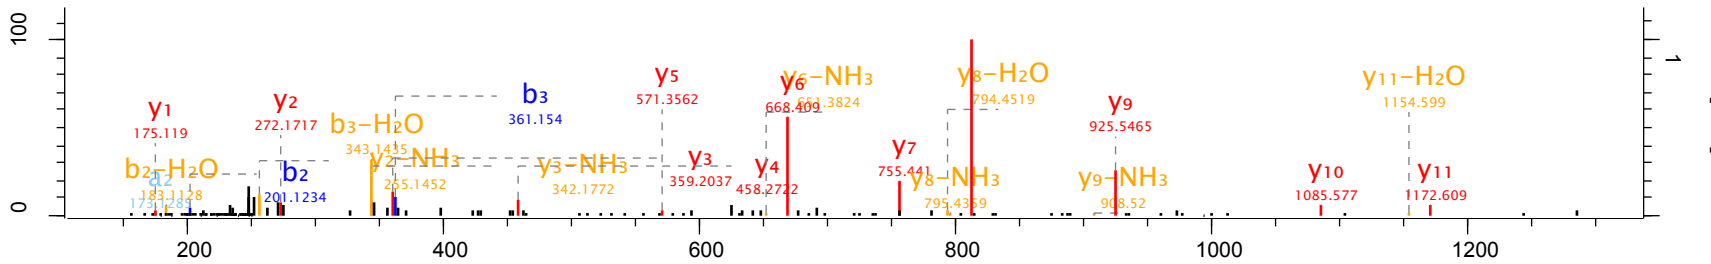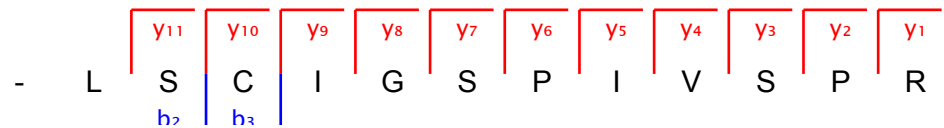

Raw file

Scan

Method

Score

m/z

Gene names

20140918\_fract24\_dyn\_5ul\_F8\_01\_392

20157

TOF; CID

42.12

762.34

PEG10

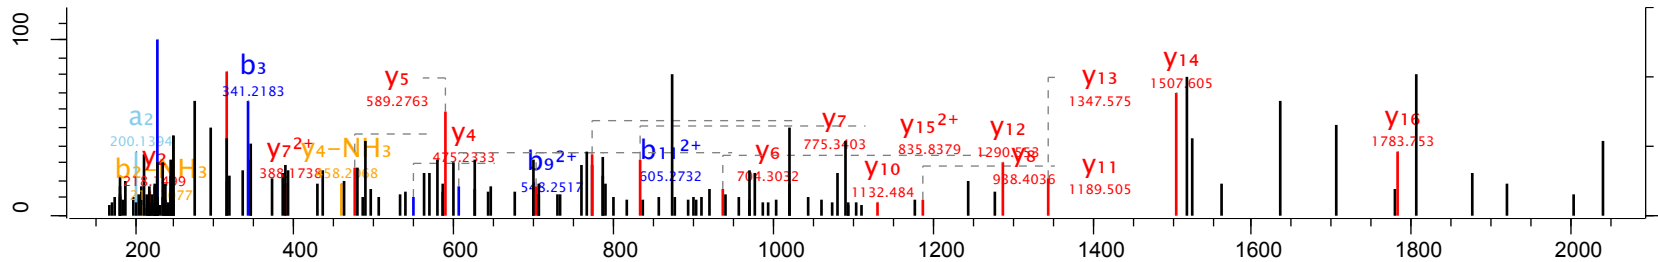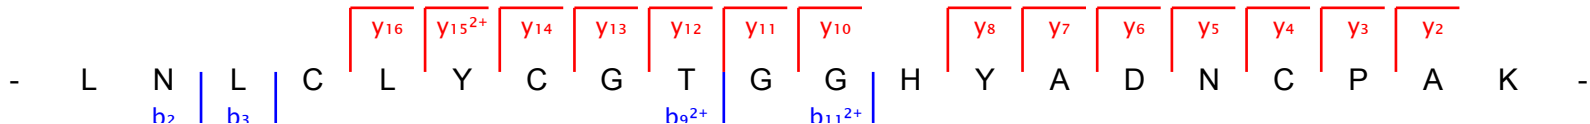

Raw file

20140918\_fract24\_dyn\_5ul\_F8\_01\_392

Scan

20417

Method

TOF; CID

Score

40.97

m/z

553.32

Gene names

FAM189B

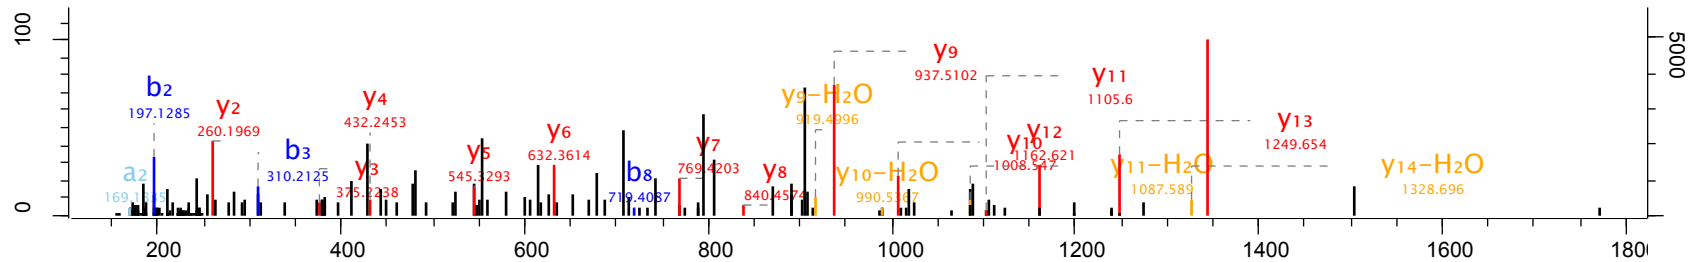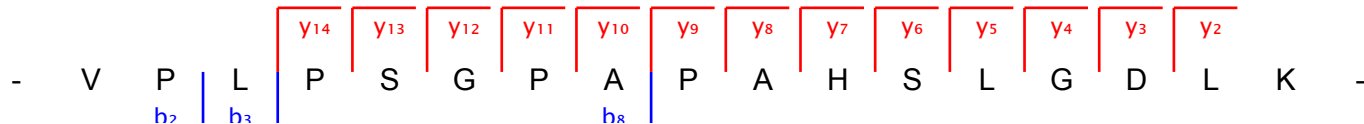

Raw file

20140918\_fract24\_dyn\_5ul\_F8\_01\_392

Scan

23998

Method

TOF; CID

Score

119.53

m/z

575.32

Gene names

BTG1

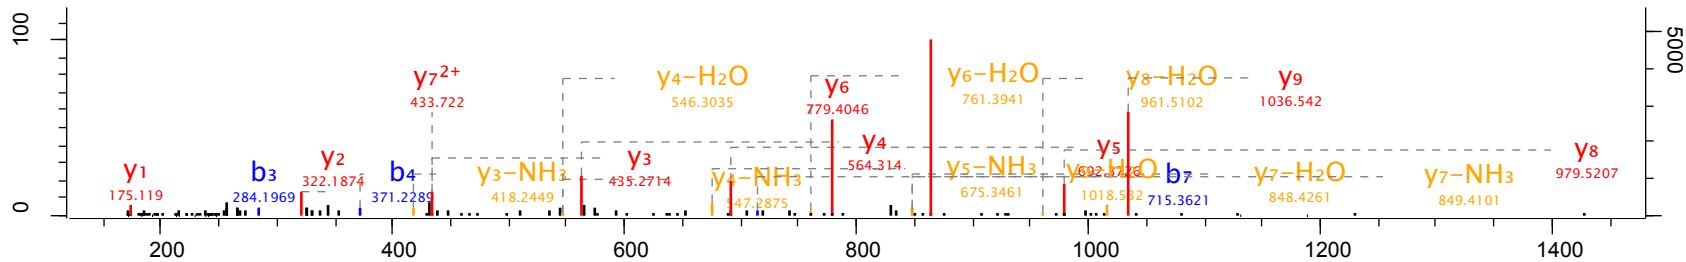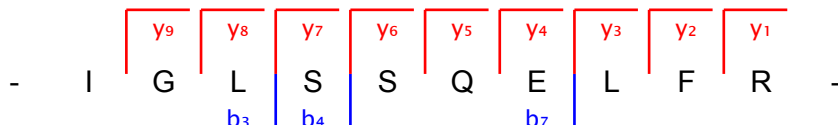



| Raw file                           | Scan  | Method   | Score  | m/z    | Gene names |
|------------------------------------|-------|----------|--------|--------|------------|
| 20140918_fract24_dyn_5ul_F8_01_392 | 29116 | TOF; CID | 139.58 | 512.29 | FAM118A    |

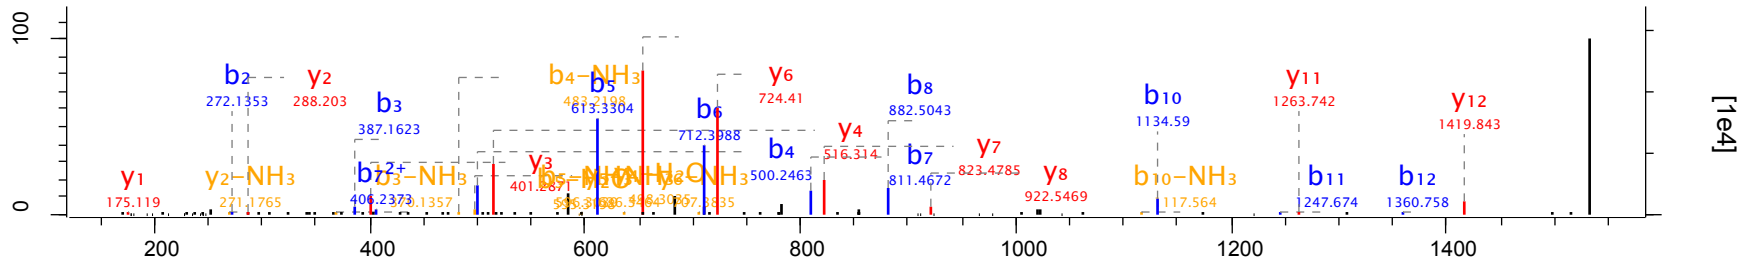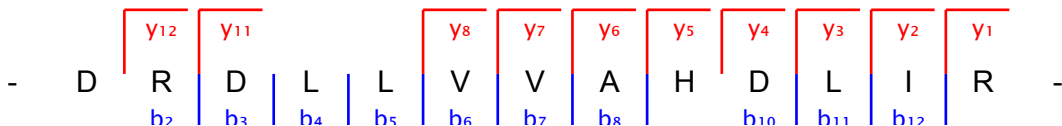

Raw file

20140918\_fract24\_dyn\_5ul\_F8\_01\_392

Scan

31489

Method

TOF; CID

Score

147.73

m/z

614.8

Gene names

ZBTB80S

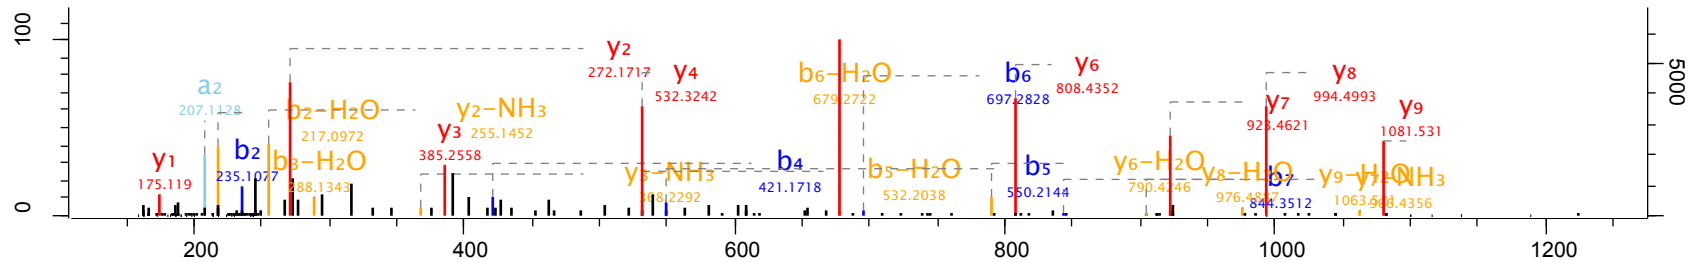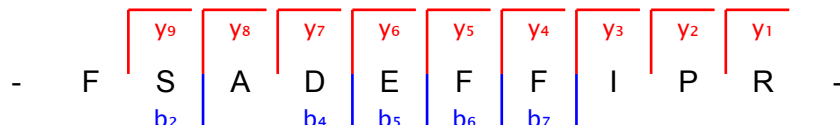

| Raw file                           | Scan  | Method   | Score | m/z    | Gene names |
|------------------------------------|-------|----------|-------|--------|------------|
| 20140918_fract24_dyn_5ul_F8_01_392 | 33403 | TOF; CID | 50.3  | 824.43 | POLI       |

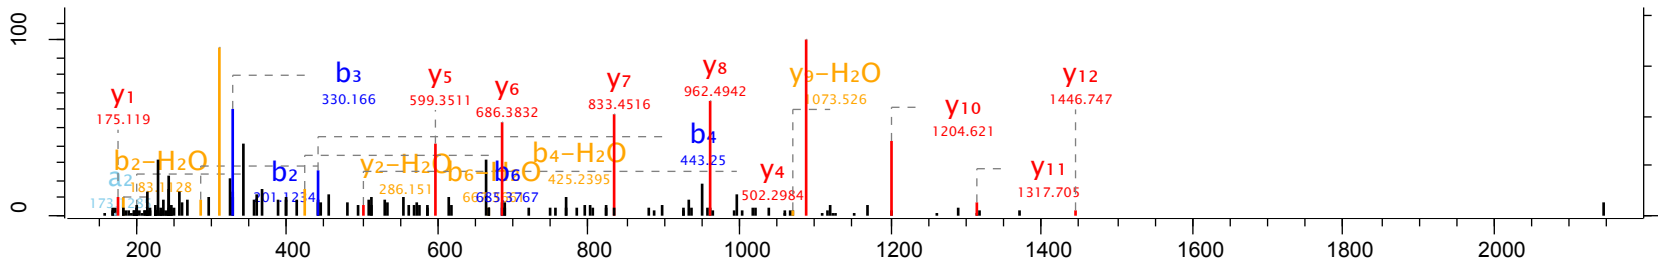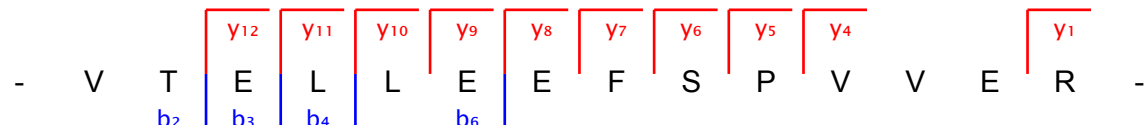

| Raw file                           | Scan  | Method   | Score | m/z    | Gene names |
|------------------------------------|-------|----------|-------|--------|------------|
| 20140918_fract24_dyn_5ul_F8_01_392 | 34044 | TOF; CID | 83.23 | 711.86 | SMIM15     |

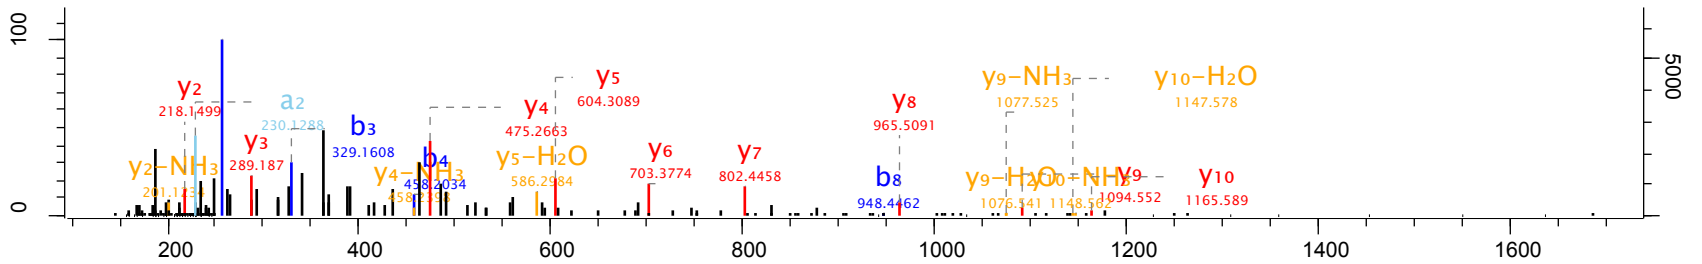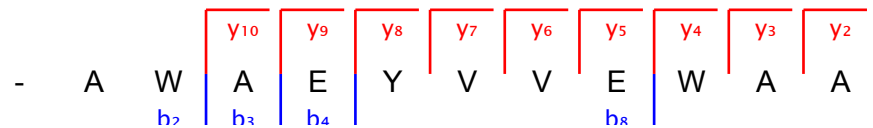

Supplement: supp_M114.047407_mcp.M114.047407-10.pdf [file supp_M114.047407_mcp.M114.047407-10.pdf]
