# Supplementary material for: The Impact II, a Very High-Resolution Quadrupole Time-of-Flight Instrument (QTOF) for Deep Shotgun Proteomics
Source: PubMed Central journal article supplement (PMC4587313; doi:10.1074/mcp.m114.047407), 2015-05-19

Raw file

20140925\_fract1\_dyn\_5ul\_B1\_01\_436

Scan

3761

Method

TOF; CID

Score

88.5

m/z

538.76

Gene names

TM4SF1

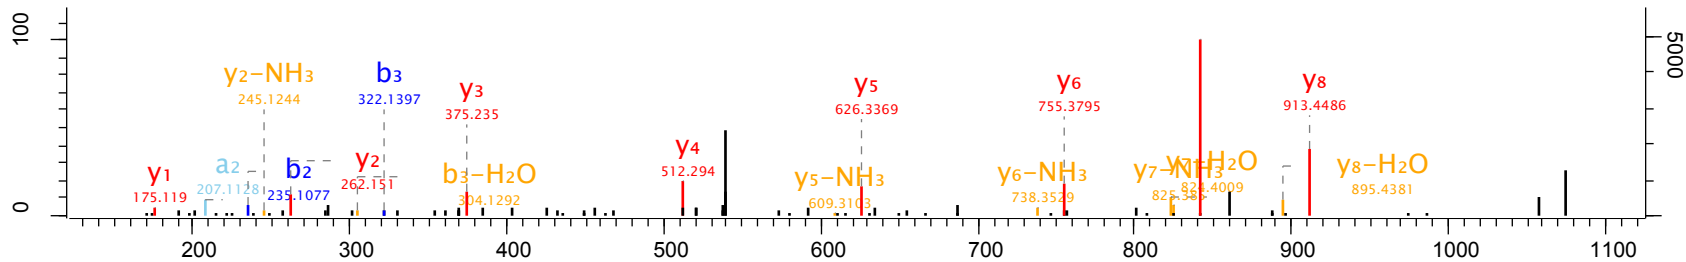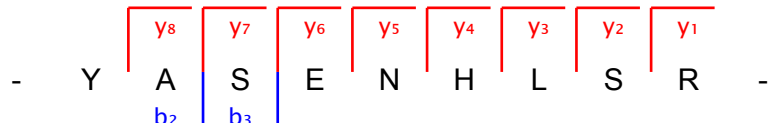

Raw file

20140925\_fract1\_dyn\_5ul\_B1\_01\_436

Scan

9153

Method

TOF; CID

Score

38.88

m/z

690.65

Gene names

SETD5

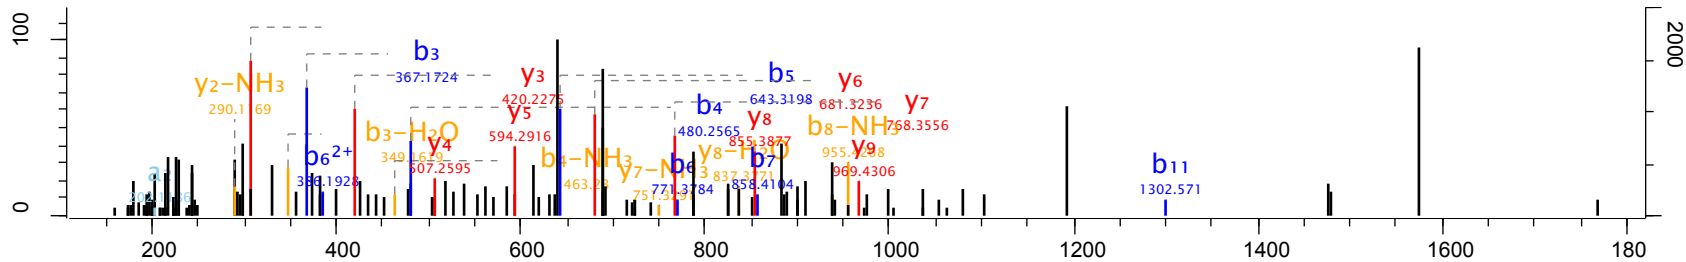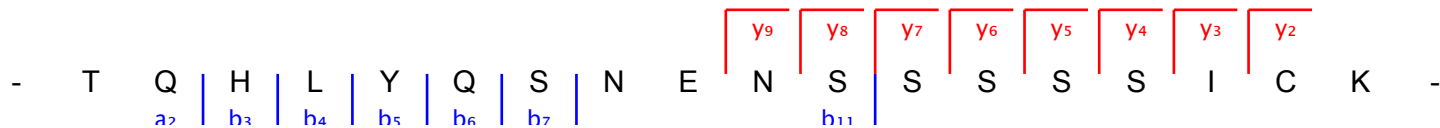

| Raw file                          | Scan  | Method   | Score | m/z    | Gene names |
|-----------------------------------|-------|----------|-------|--------|------------|
| 20140925_fract1_dyn_5ul_B1_01_436 | 11407 | TOF; CID | 44.51 | 483.88 | KLHL5      |

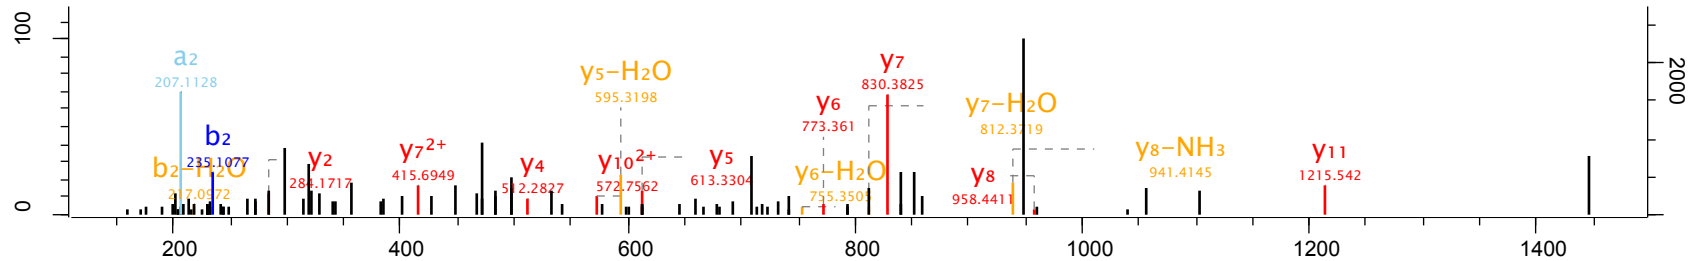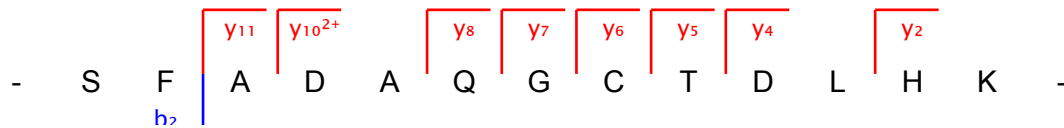

Raw file

20140925\_fract1\_dyn\_5ul\_B1\_01\_436

Scan

11708

Method

TOF; CID

Score

48.71

m/z

590.62

Gene names

PRDM4

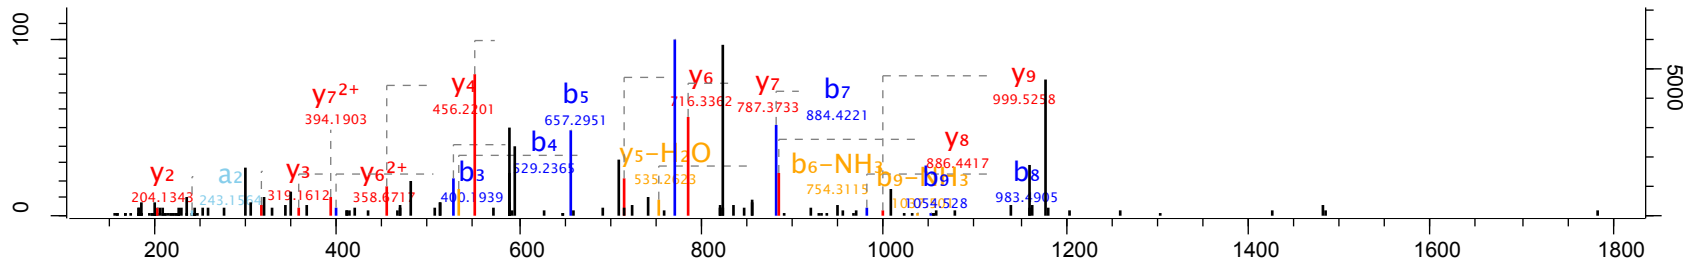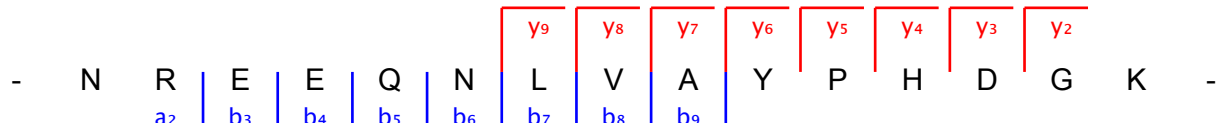

Raw file

20140925\_fract1\_dyn\_5ul\_B1\_01\_436

Scan

12547

Method

TOF; CID

Score

59.23

m/z

632.32

Gene names

HERC6

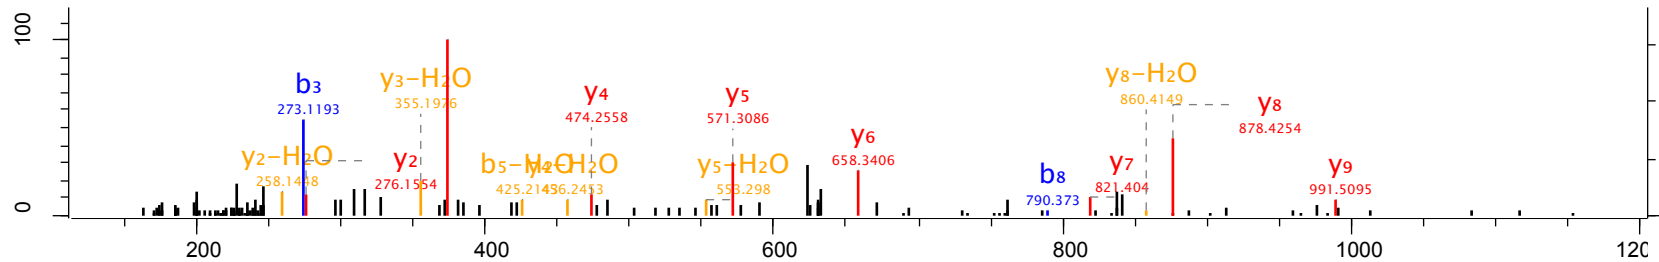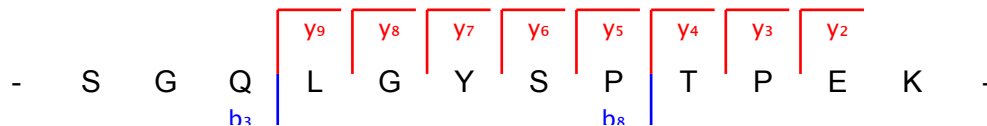

Raw file

20140925\_fract1\_dyn\_5ul\_B1\_01\_436

Scan

17592

Method

TOF; CID

Score

81.8

m/z

726.36

Gene names

SCNN1B

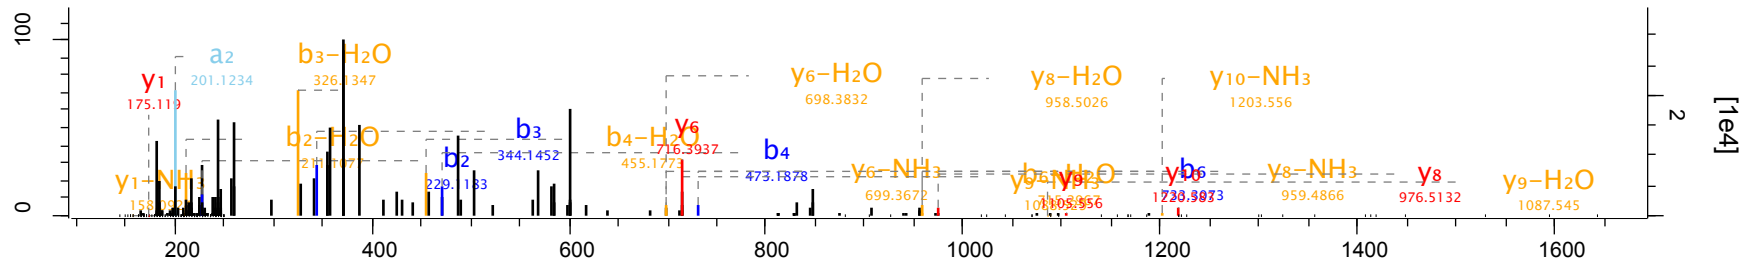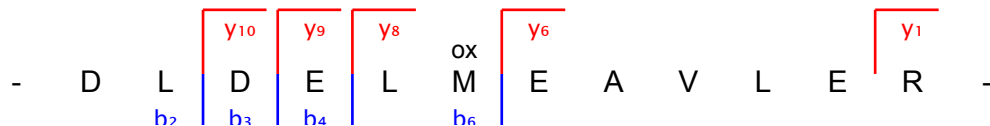

| Raw file                          | Scan  | Method   | Score | m/z    | Gene names |
|-----------------------------------|-------|----------|-------|--------|------------|
| 20140925_fract1_dyn_5ul_B1_01_436 | 18212 | TOF; CID | 77.06 | 312.54 | ZNF668     |

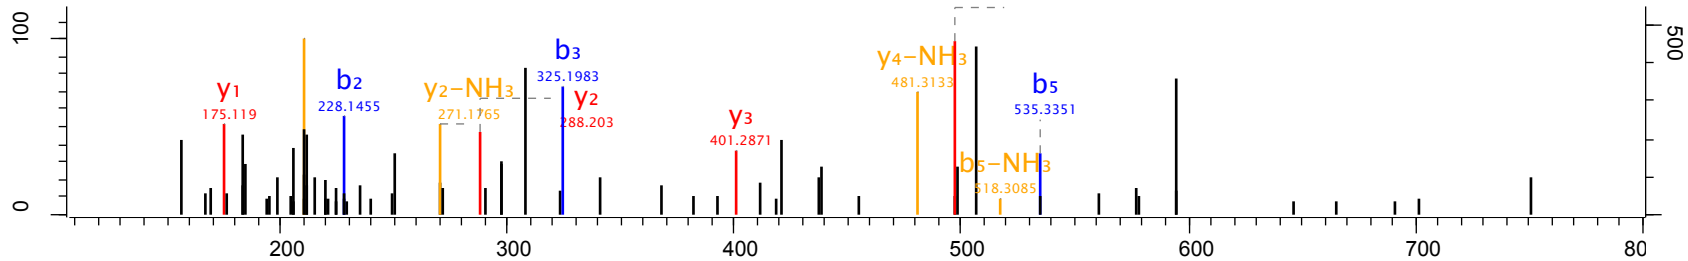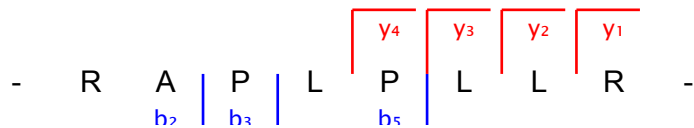

| Raw file                          | Scan  | Method   | Score | m/z    | Gene names |
|-----------------------------------|-------|----------|-------|--------|------------|
| 20140925_fract1_dyn_5ul_B1_01_436 | 21807 | TOF; CID | 82.29 | 545.82 | CDCA4      |

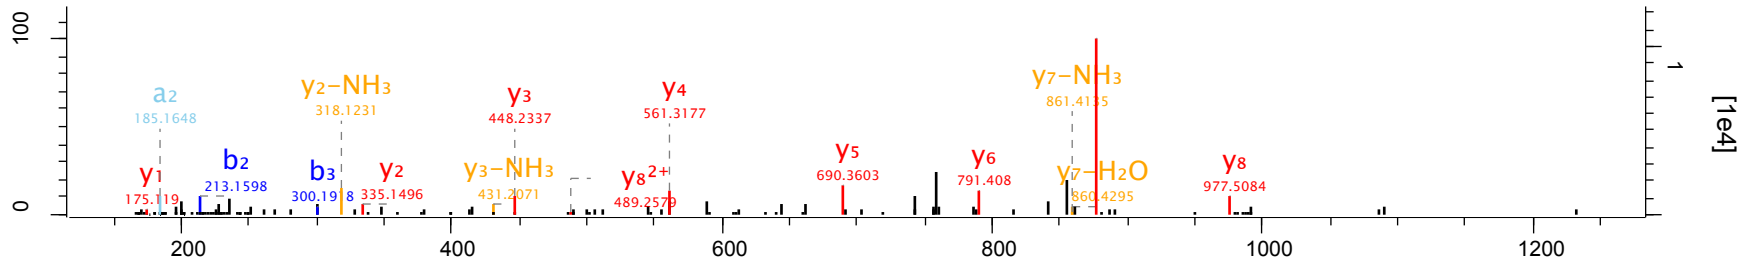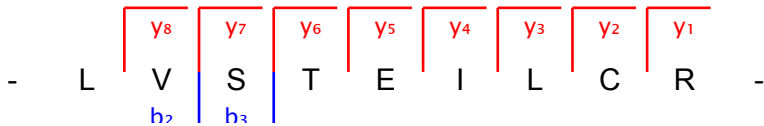



Raw file

20140925\_fract1\_dyn\_5ul\_B1\_01\_436

Scan

22467

Method

TOF; CID

Score

77.42

m/z

445.75

Gene names

SLC35A3

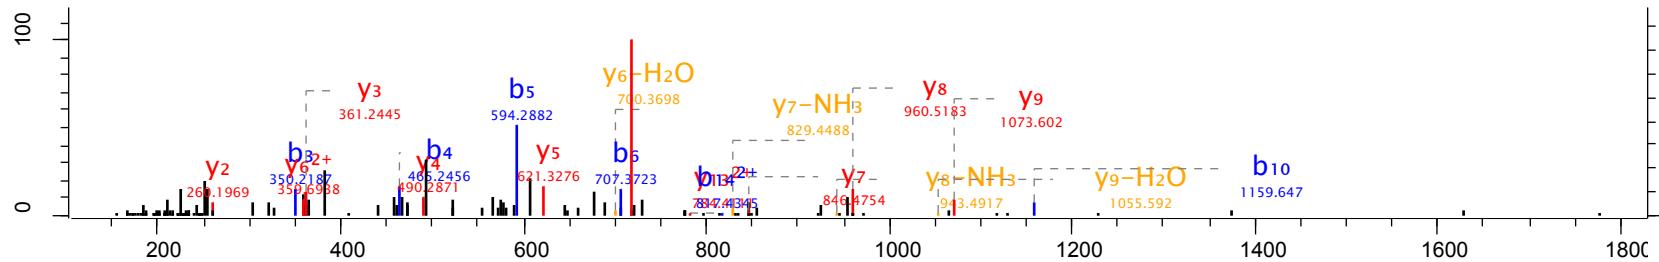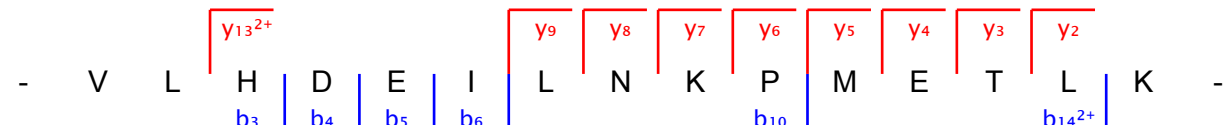

| Raw file                          | Scan  | Method   | Score | m/z    | Gene names |
|-----------------------------------|-------|----------|-------|--------|------------|
| 20140925_fract1_dyn_5ul_B1_01_436 | 25443 | TOF; CID | 68.28 | 796.39 | SRRD       |

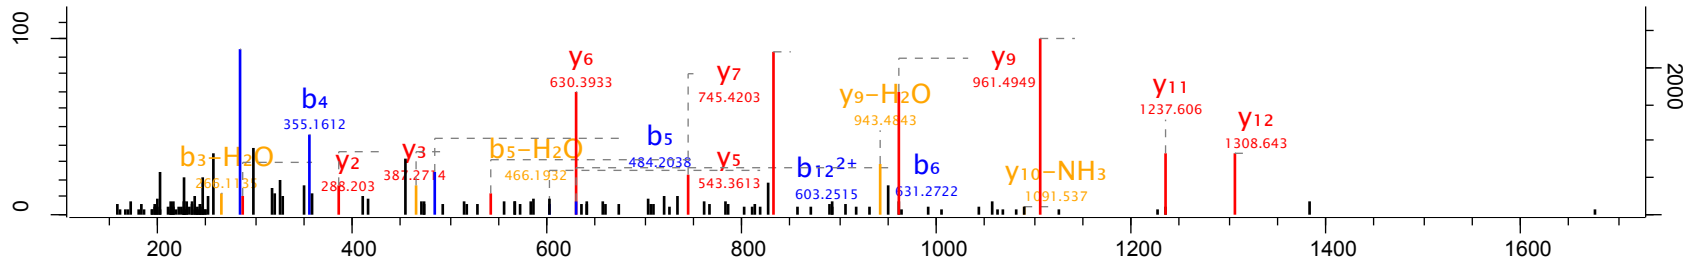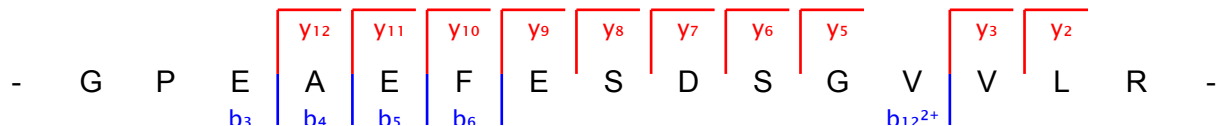

Raw file

20140925\_fract1\_dyn\_5ul\_B1\_01\_436

Scan

27361

Method

TOF; CID

Score

47.77

m/z

499.29

Gene names

SPATA31C2;SPATA31C1

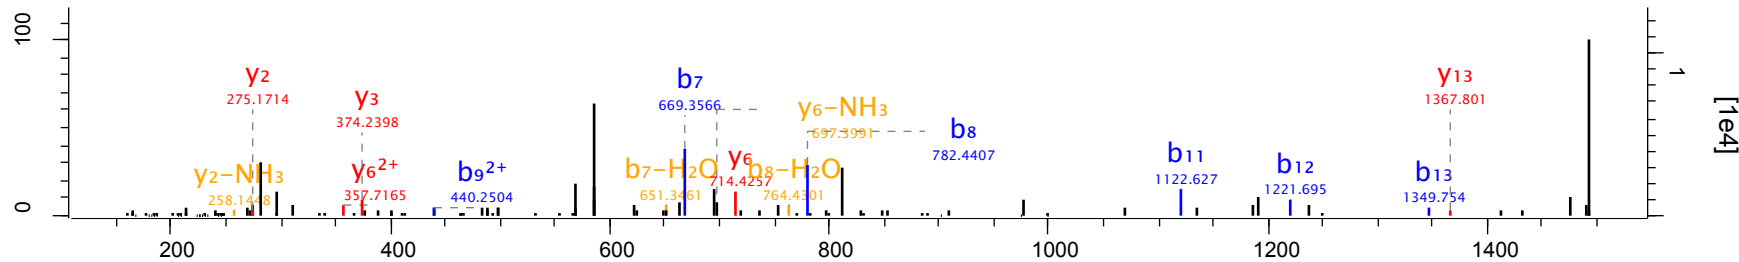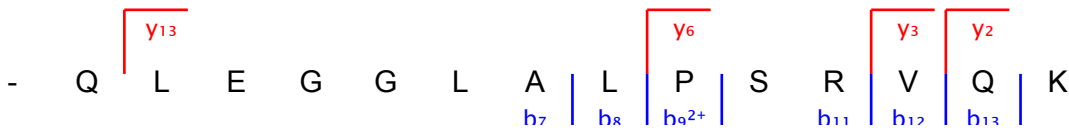

Raw file

20140925\_fract1\_dyn\_5ul\_B1\_01\_436

Scan

28512

Method

TOF; CID

Score

65.29

m/z

469.25

Gene names

CHAC1

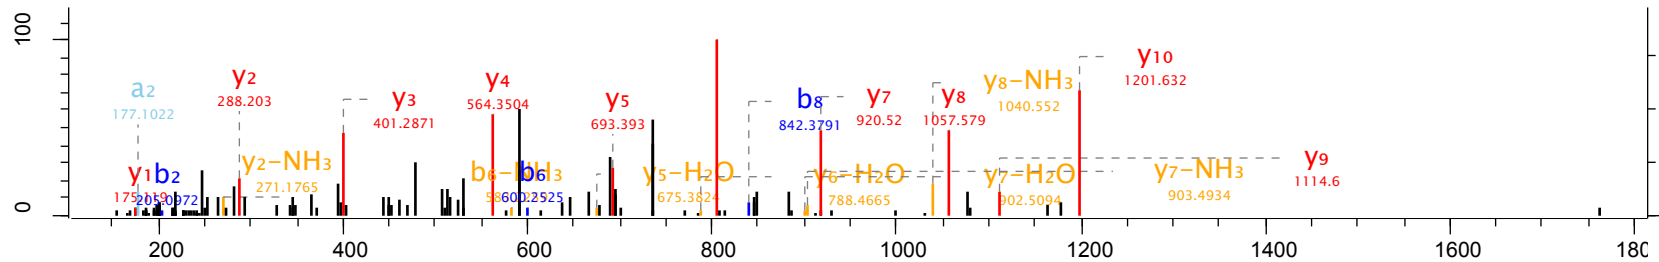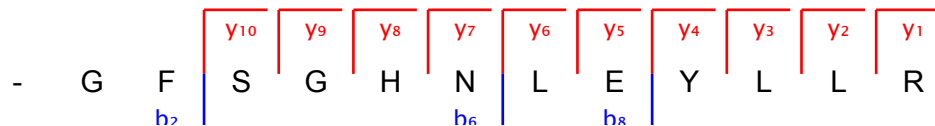

| Raw file                          | Scan  | Method   | Score | m/z    | Gene names |
|-----------------------------------|-------|----------|-------|--------|------------|
| 20140925_fract1_dyn_5ul_B1_01_436 | 29388 | TOF; CID | 66.57 | 790.96 | ARL4A      |

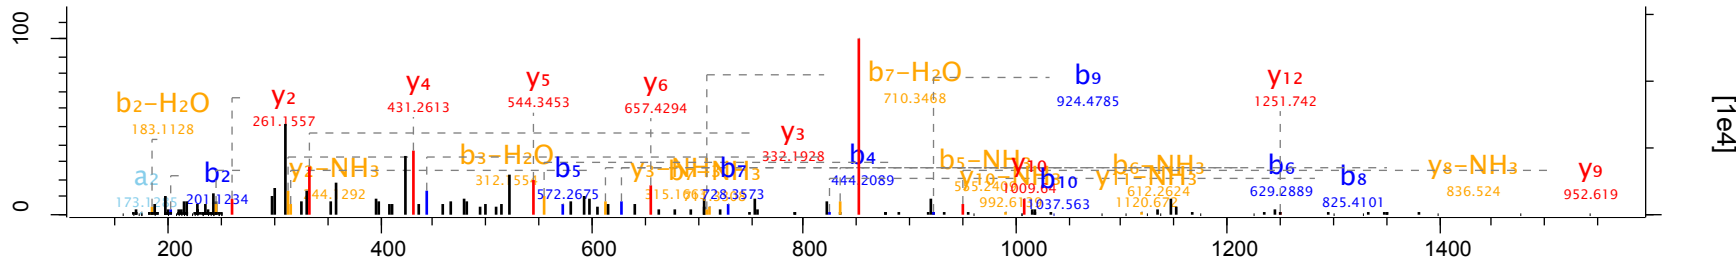

- I S E N Q G V P V L I V A N K -

h<sub>2</sub> | h<sub>4</sub> | h<sub>5</sub> | h<sub>6</sub> | h<sub>7</sub> | h<sub>8</sub> | h<sub>9</sub> | h<sub>10</sub>

y<sub>12</sub> | y<sub>10</sub> | y<sub>9</sub> | y<sub>8</sub> | y<sub>6</sub> | y<sub>5</sub> | y<sub>4</sub> | y<sub>3</sub> | y<sub>2</sub>

| Raw file                          | Scan  | Method   | Score | m/z   | Gene names |
|-----------------------------------|-------|----------|-------|-------|------------|
| 20140925_fract1_dyn_5ul_B1_01_436 | 30244 | TOF; CID | 41.62 | 567.3 | TECTA      |

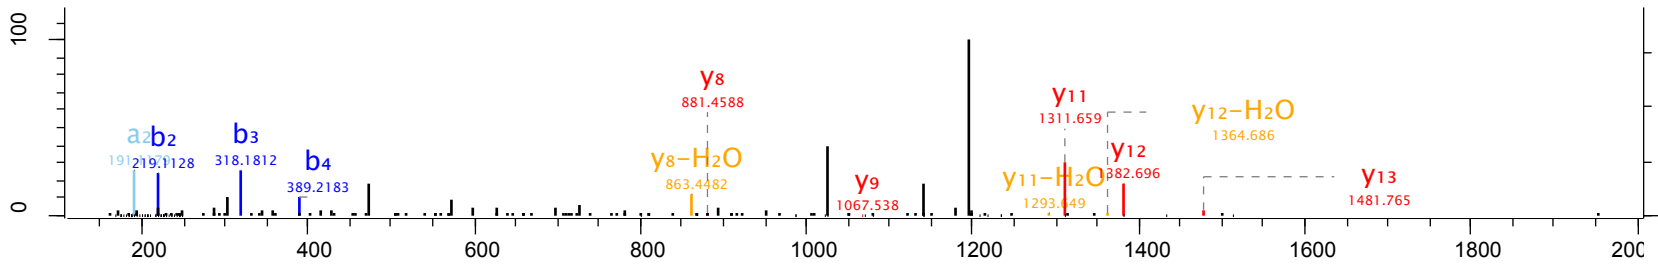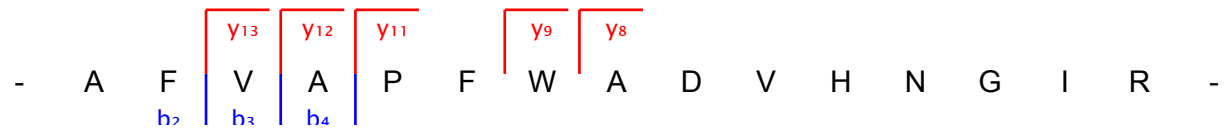

[1e4]

Raw file

20140925\_fract1\_dyn\_5ul\_B1\_01\_436

Scan

30678

Method

TOF; CID

Score

61.28

m/z

999.02

Gene names

GLYCTK

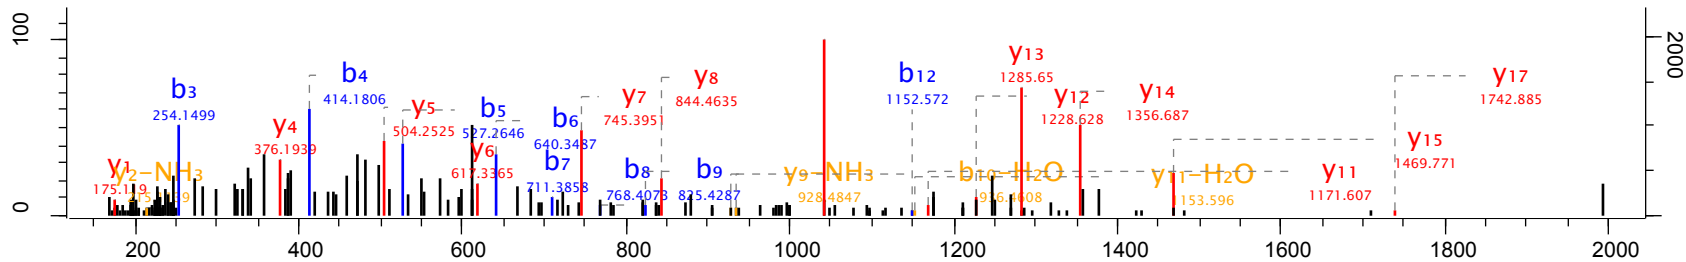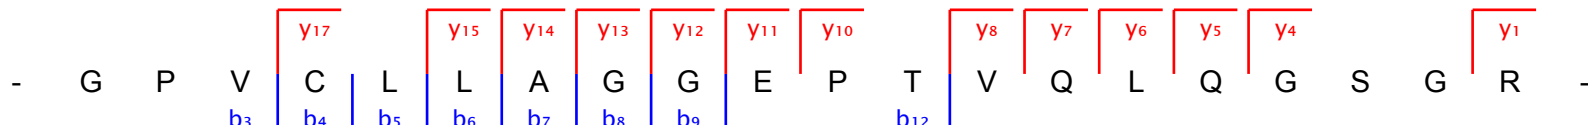

Raw file

20140925\_fract1\_dyn\_5ul\_B1\_01\_436

Scan

32676

Method

TOF; CID

Score

44.34

m/z

772.74

Gene names

PLLP

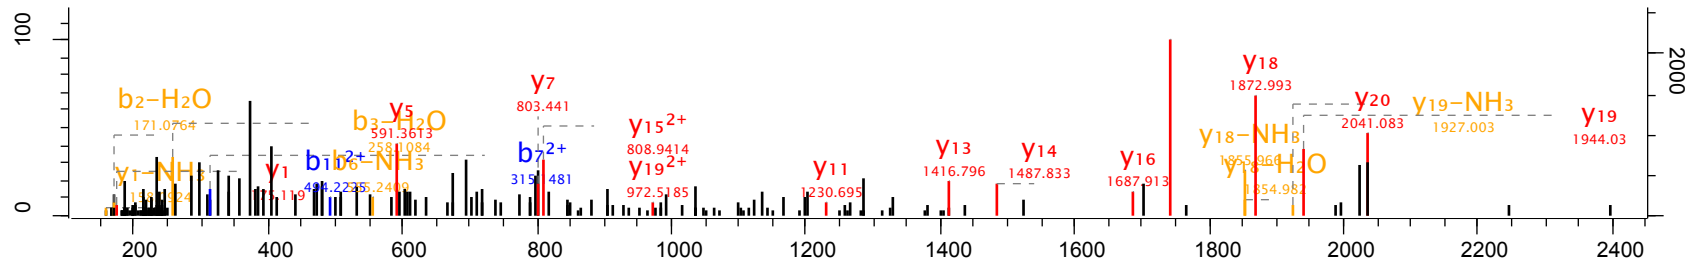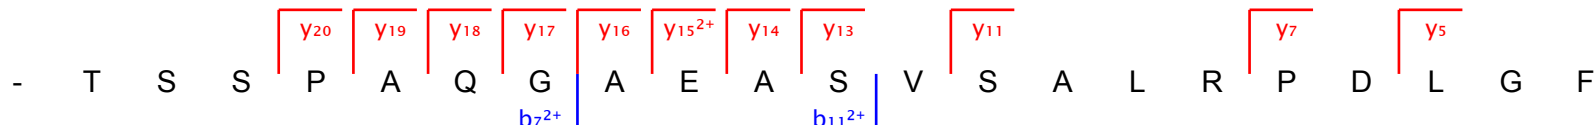



| Raw file                          | Scan  | Method   | Score  | m/z    | Gene names |
|-----------------------------------|-------|----------|--------|--------|------------|
| 20140925_fract1_dyn_5ul_B1_01_436 | 34114 | TOF; CID | 126.91 | 575.32 | STK19      |

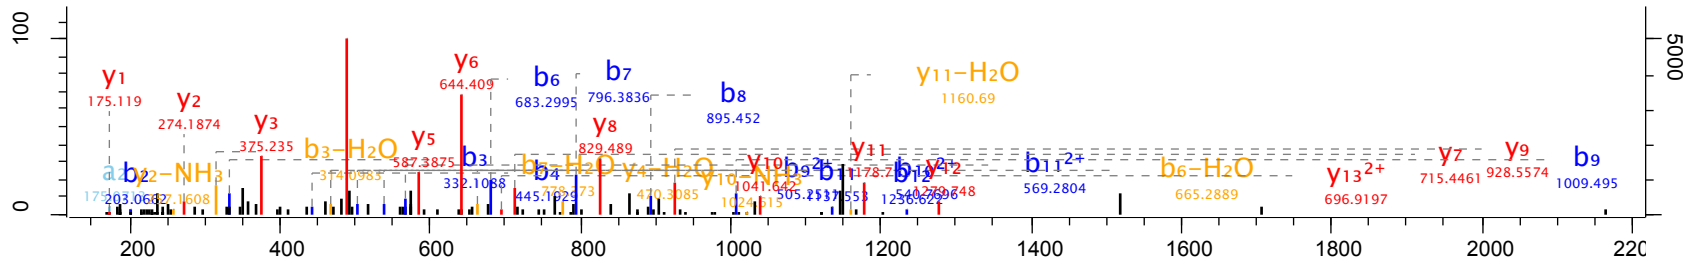

- D S E I T H L V N A G V L T V R -

b<sub>2</sub> | b<sub>3</sub> | y<sub>13</sub><sup>2+</sup> | y<sub>12</sub> | y<sub>11</sub> | y<sub>10</sub> | y<sub>9</sub> | y<sub>8</sub> | y<sub>7</sub> | y<sub>6</sub> | y<sub>5</sub> | y<sub>4</sub> | y<sub>3</sub> | y<sub>2</sub> | y<sub>1</sub>

b<sub>4</sub> | b<sub>6</sub> | b<sub>7</sub> | b<sub>8</sub> | b<sub>9</sub> | b<sub>10</sub><sup>2+</sup> | b<sub>11</sub> | b<sub>12</sub>

Raw file

20140925\_fract1\_dyn\_5ul\_B1\_01\_436

Scan

37990

Method

TOF; CID

Score

101.3

m/z

613.31

Gene names

TMEM234

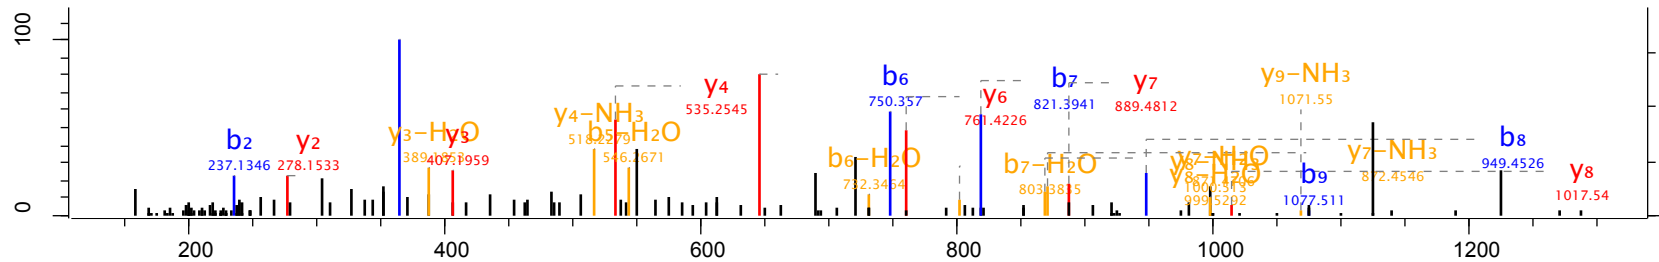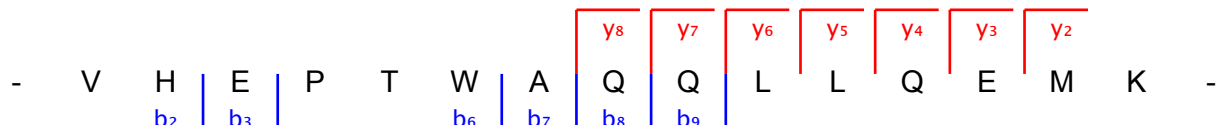

Raw file

20140925\_fract1\_dyn\_5ul\_B1\_01\_436

Scan

38064

Method

TOF; CID

Score

95.2

m/z

943.47

Gene names

ZBTB3

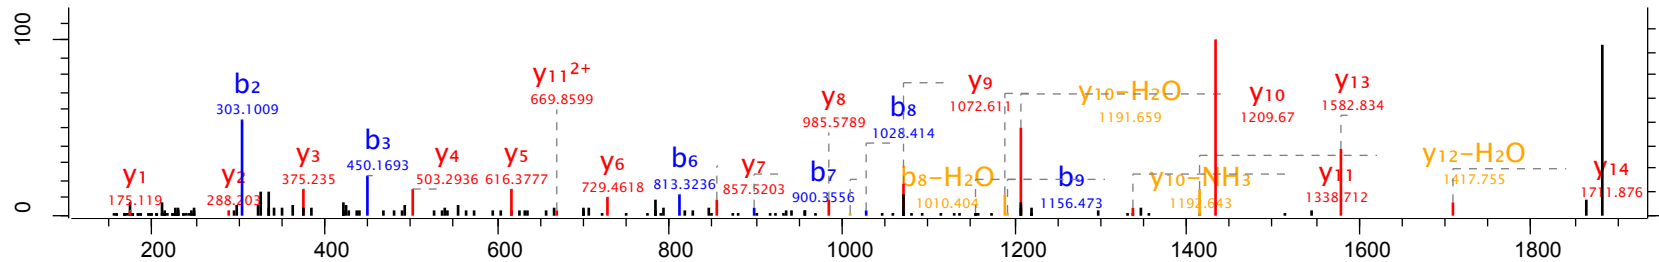

ac

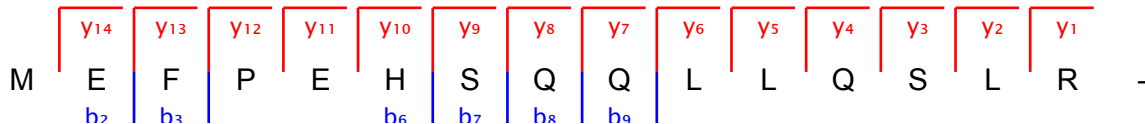

Raw file

20140925\_fract1\_dyn\_5ul\_B1\_01\_436

Scan

39762

Method

TOF; CID

Score

83.37

m/z

967.99

Gene names

CLIC5;CLIC6

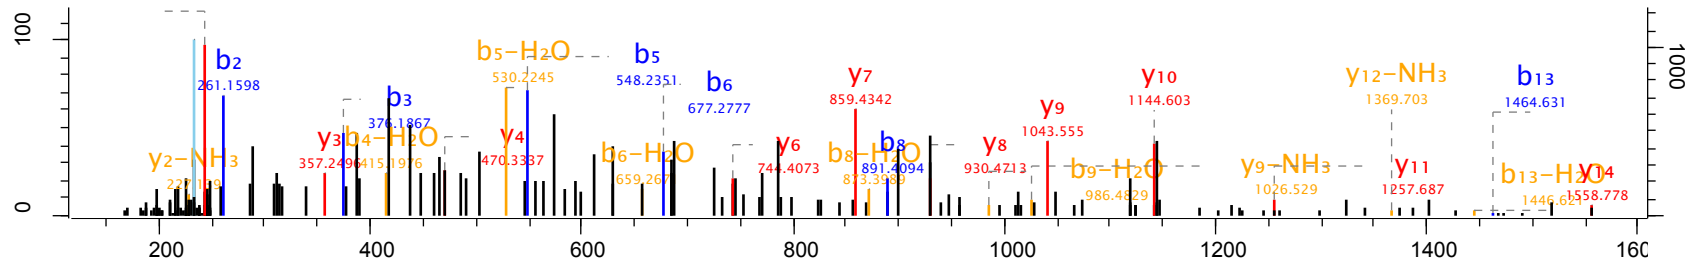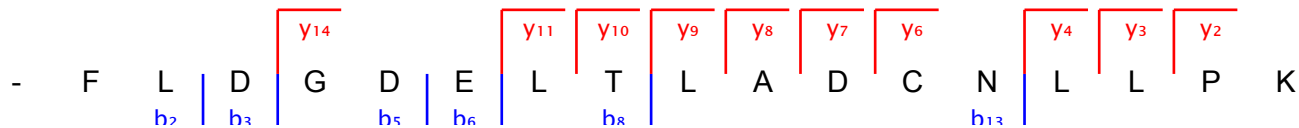

Raw file

20140925\_fract2\_dyn\_5ul\_B2\_01\_437

Scan

3804

Method

TOF; CID

Score

76.23

m/z

390.53

Gene names

BBIP1

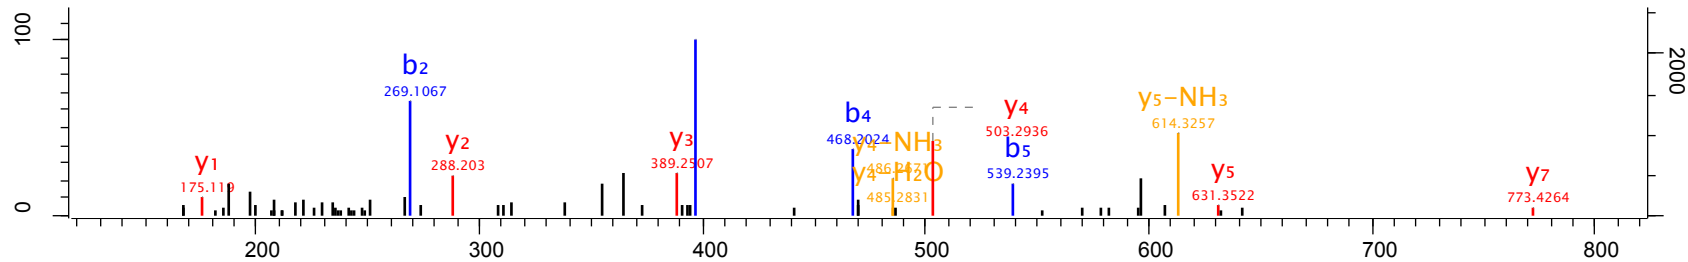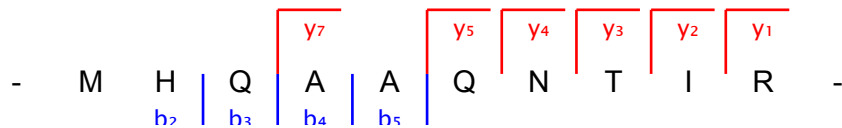

| Raw file                          | Scan | Method   | Score  | m/z    | Gene names |
|-----------------------------------|------|----------|--------|--------|------------|
| 20140925_fract2_dyn_5ul_B2_01_437 | 4899 | TOF; CID | 119.21 | 330.19 | HMGN4      |

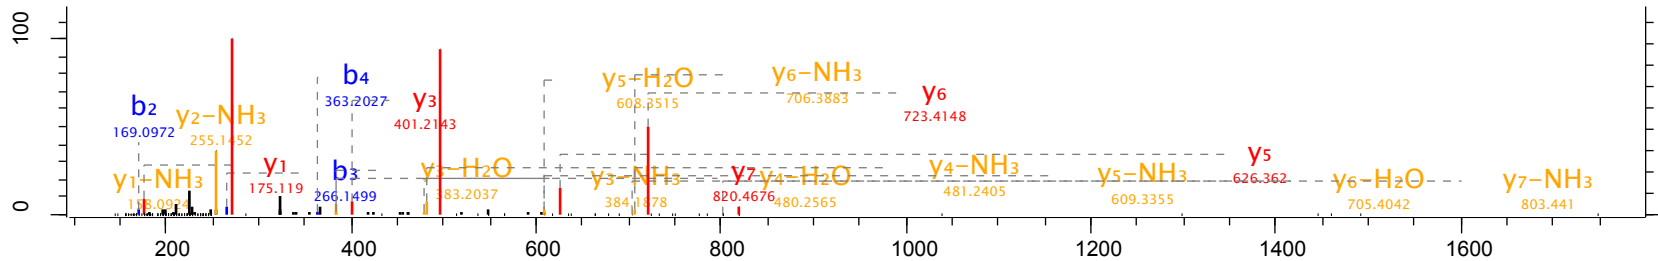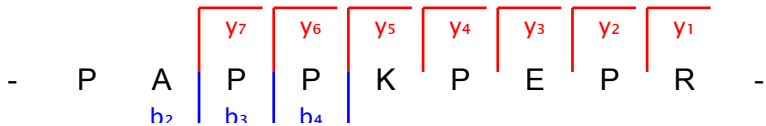

[1e4]

Raw file

20140925\_fract2\_dyn\_5ul\_B2\_01\_437

Scan

Method

Score

m/z

Gene names

4992

TOF; CID

67.33

556.26

ZNF485

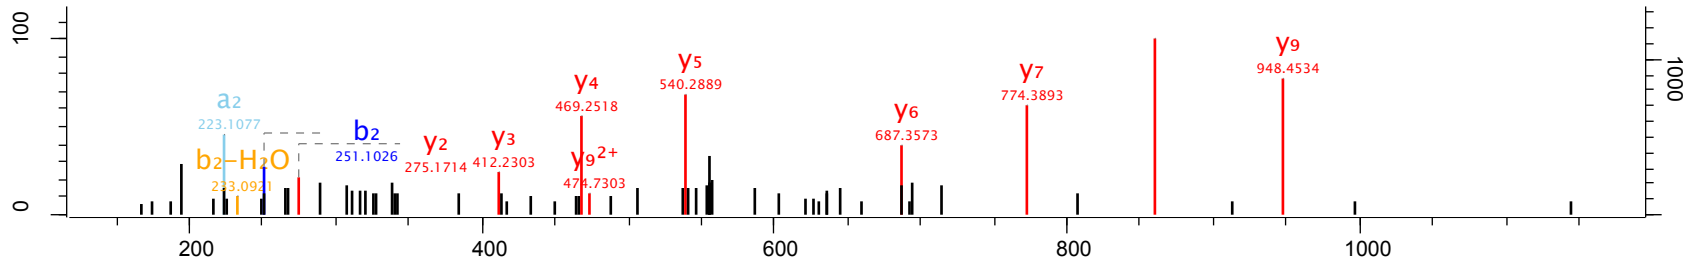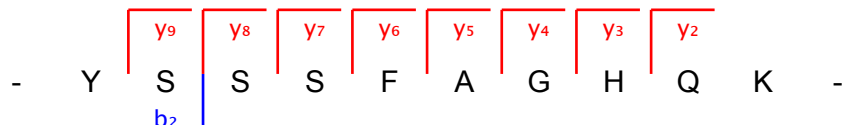

| Raw file                          | Scan | Method   | Score | m/z    | Gene names |
|-----------------------------------|------|----------|-------|--------|------------|
| 20140925_fract2_dyn_5ul_B2_01_437 | 7133 | TOF; CID | 73.67 | 510.75 | C18orf32   |

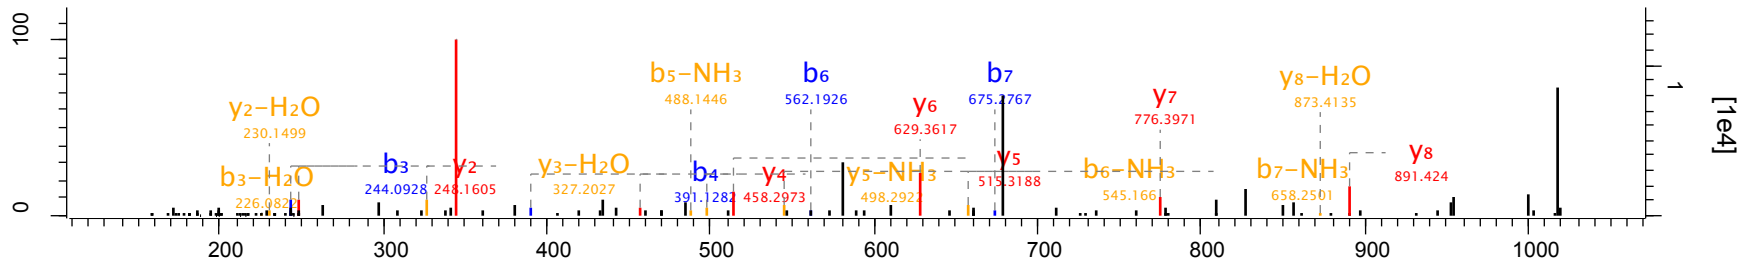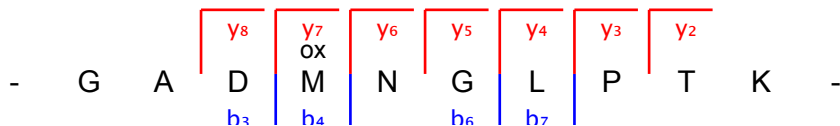



Raw file

20140925\_fract2\_dyn\_5ul\_B2\_01\_437

Scan

9624

Method

TOF; CID

Score

79.47

m/z

323.51

Gene names

CHIC1

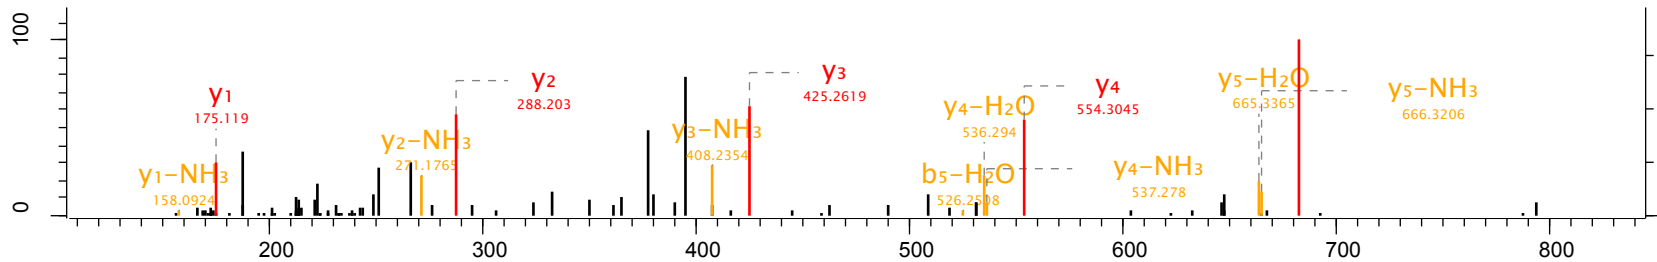

- V V S E E H L R -

Fragmentation diagram showing the sequence of amino acids: V, V, S, E, E, H, L, R. The diagram indicates the fragmentation sites for the y-series ions (y1 to y5) and the b5 ion, with red brackets above the sequence.

| Raw file                          | Scan  | Method   | Score | m/z    | Gene names |
|-----------------------------------|-------|----------|-------|--------|------------|
| 20140925_fract2_dyn_5ul_B2_01_437 | 11066 | TOF; CID | 79.64 | 660.32 | NDFIP2     |

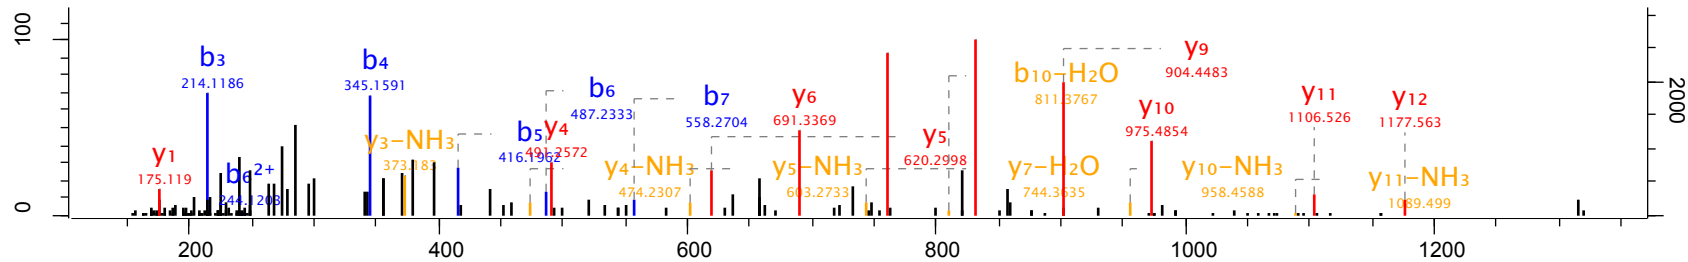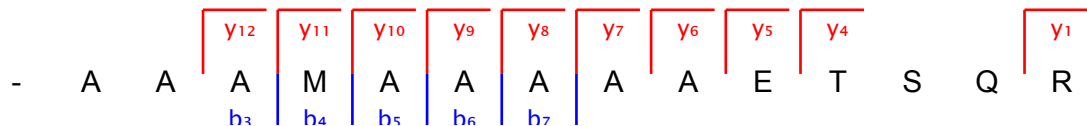

Raw file

20140925\_fract2\_dyn\_5ul\_B2\_01\_437

Scan

12490

Method

TOF; CID

Score

72.89

m/z

720.31

Gene names

LEPROTL1

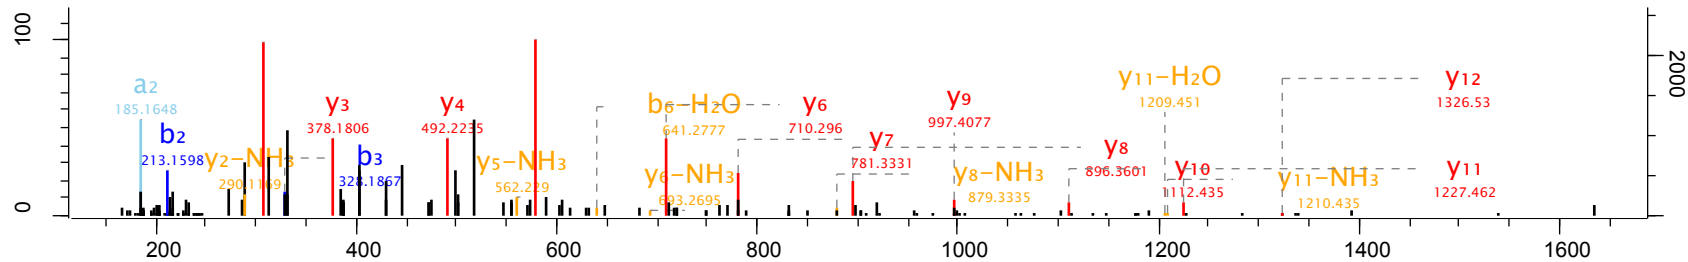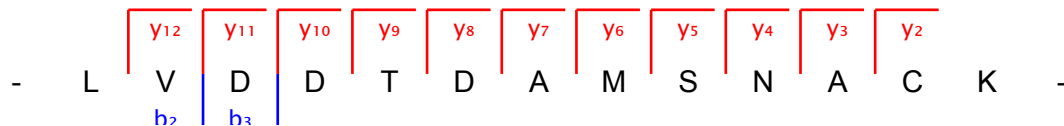

Raw file

20140925\_fract2\_dyn\_5ul\_B2\_01\_437

Scan

13182

Method

TOF; CID

Score

54.9

m/z

735.84

Gene names

ZNF276

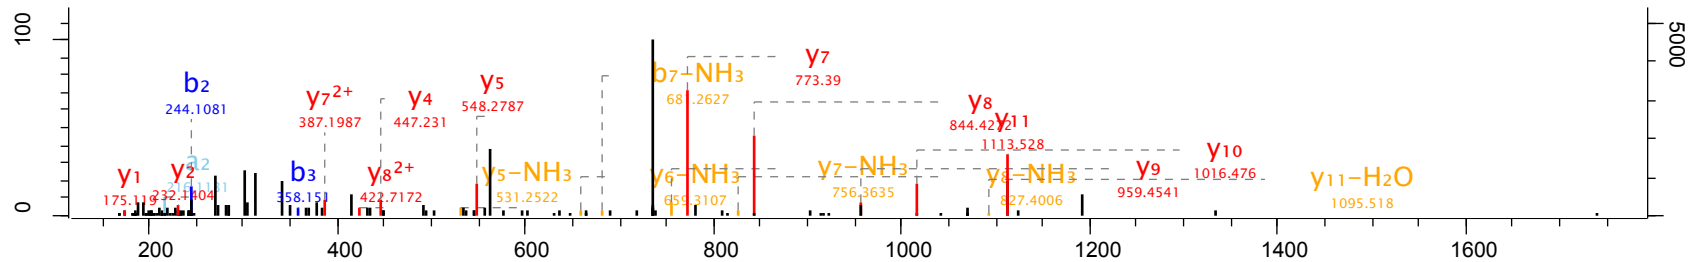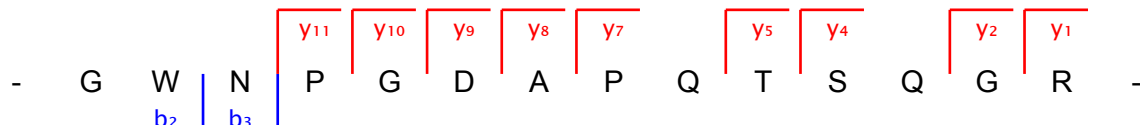

| Raw file                          | Scan  | Method   | Score | m/z   |
|-----------------------------------|-------|----------|-------|-------|
| 20140925_fract2_dyn_5ul_B2_01_437 | 15478 | TOF; CID | 72.2  | 609.8 |

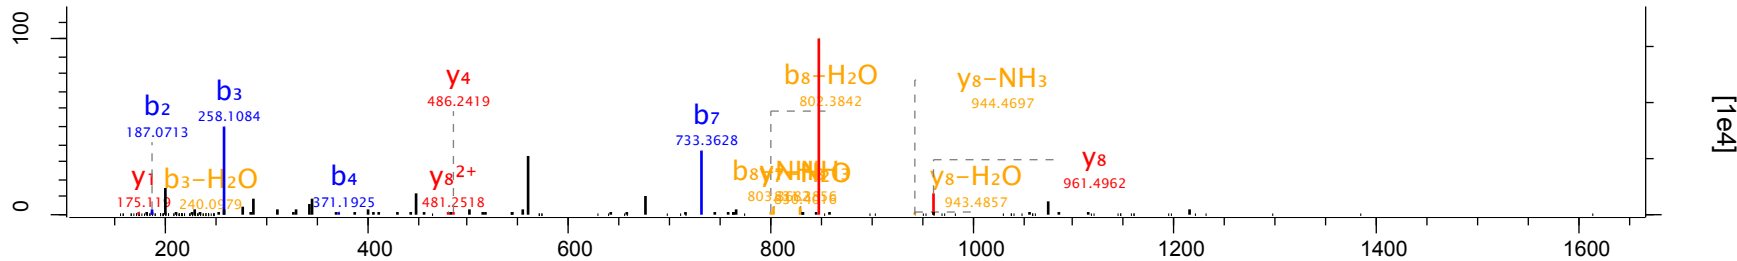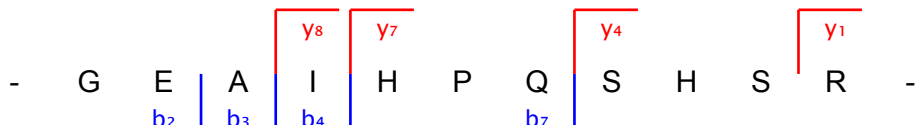

Raw file

20140925\_fract2\_dyn\_5ul\_B2\_01\_437

Scan

18205

Method

TOF; CID

Score

120.63

m/z

858.93

Gene names

APOC3

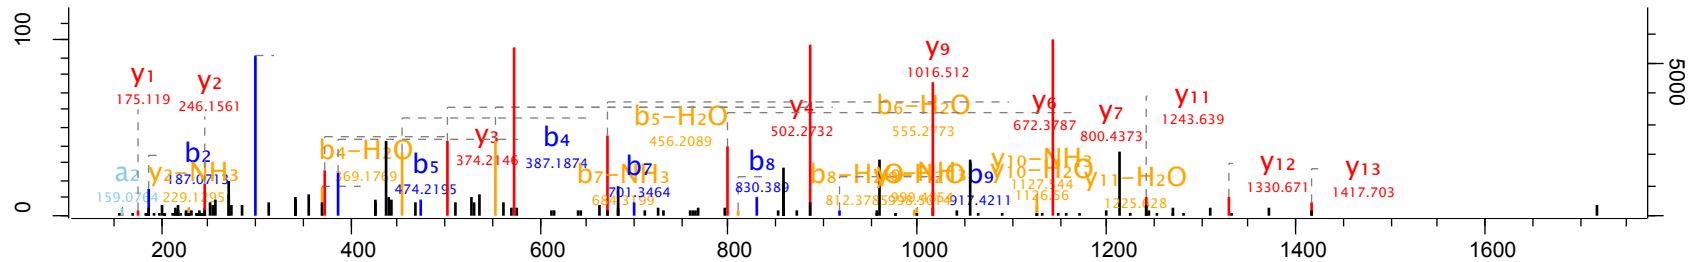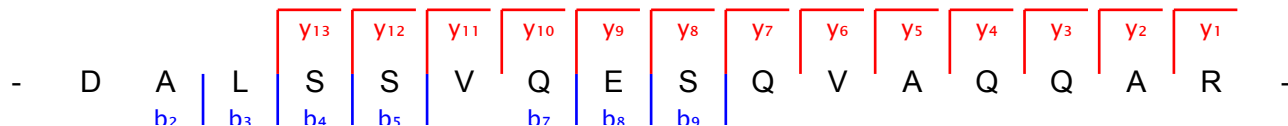

Raw file

20140925\_fract2\_dyn\_5ul\_B2\_01\_437

Scan

22456

Method

TOF; CID

Score

118.52

m/z

674.31

Gene names

BATF3

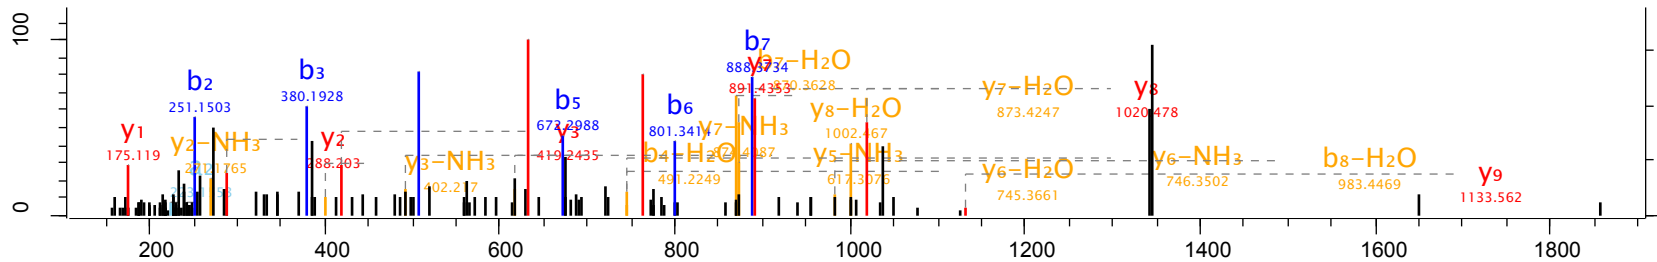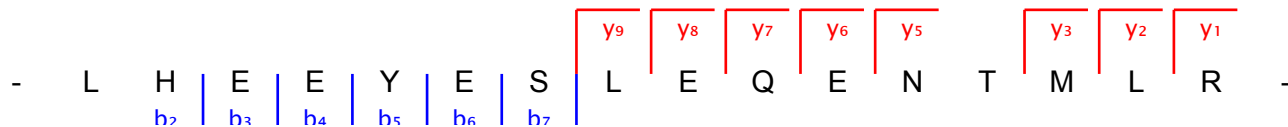

| Raw file                          | Scan  | Method   | Score  | m/z    | Gene names |
|-----------------------------------|-------|----------|--------|--------|------------|
| 20140925_fract2_dyn_5ul_B2_01_437 | 25530 | TOF; CID | 101.32 | 756.86 | FAM73A     |

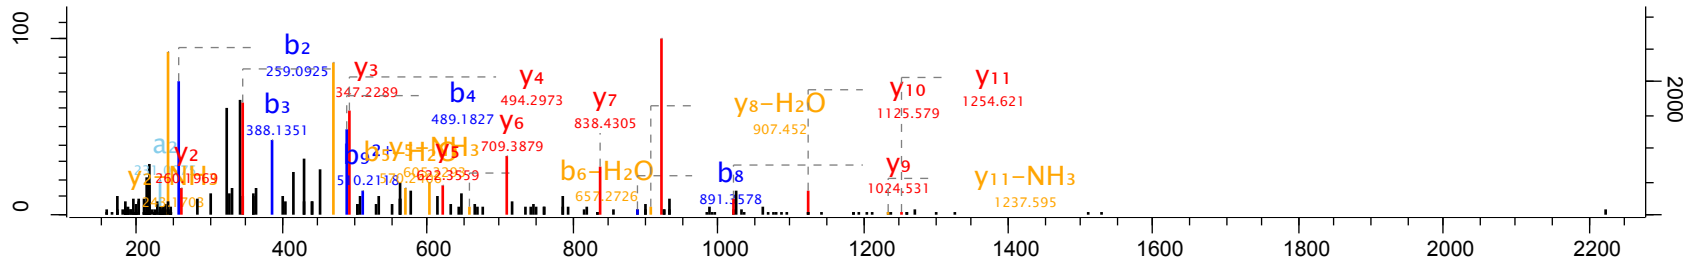

ac

- S E E T V S E S Q F S L K -

b<sub>2</sub> b<sub>3</sub> b<sub>4</sub> b<sub>8</sub> b<sub>9</sub><sup>2+</sup>

y<sub>11</sub> y<sub>10</sub> y<sub>9</sub> y<sub>8</sub> y<sub>7</sub> y<sub>6</sub> y<sub>5</sub> y<sub>4</sub> y<sub>3</sub> y<sub>2</sub>



| Raw file                          | Scan  | Method   | Score  | m/z    | Gene names |
|-----------------------------------|-------|----------|--------|--------|------------|
| 20140925_fract2_dyn_5ul_B2_01_437 | 26853 | TOF; CID | 116.63 | 505.27 | MRPL57     |

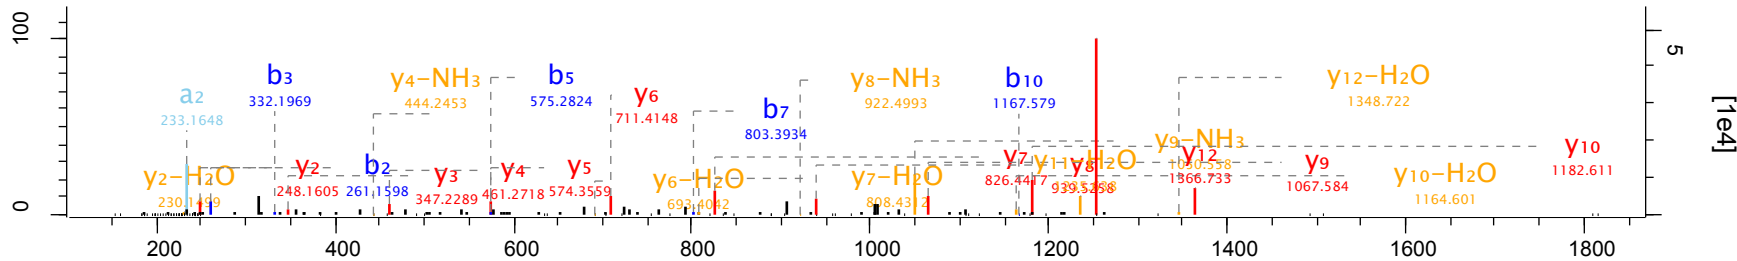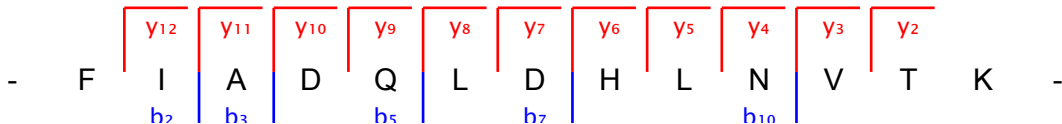

| Raw file                          | Scan  | Method   | Score  | m/z    | Gene names |
|-----------------------------------|-------|----------|--------|--------|------------|
| 20140925_fract2_dyn_5ul_B2_01_437 | 29916 | TOF; CID | 101.05 | 983.44 | PPP1R16A   |

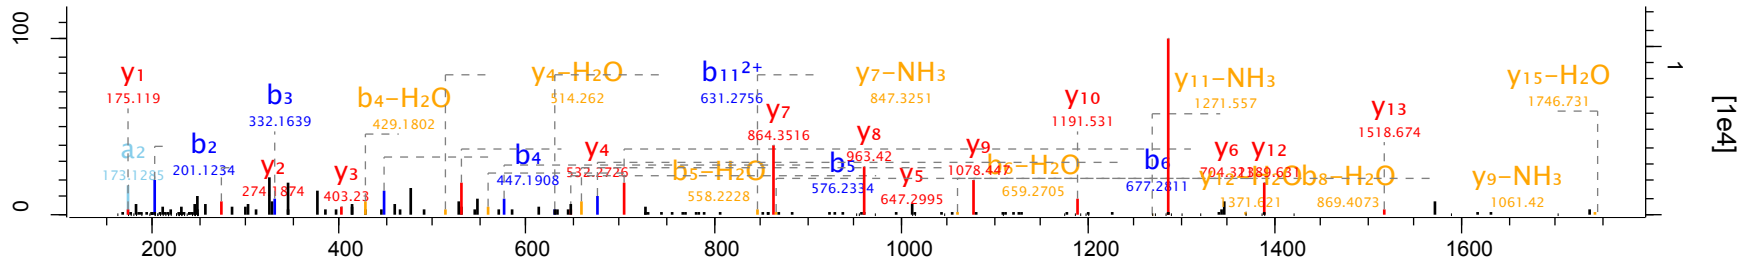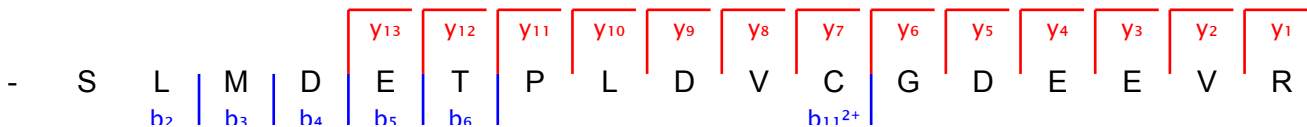

| Raw file                          | Scan  | Method   | Score  | m/z    | Gene names |
|-----------------------------------|-------|----------|--------|--------|------------|
| 20140925_fract2_dyn_5ul_B2_01_437 | 30628 | TOF; CID | 110.41 | 496.76 | SEPT3      |

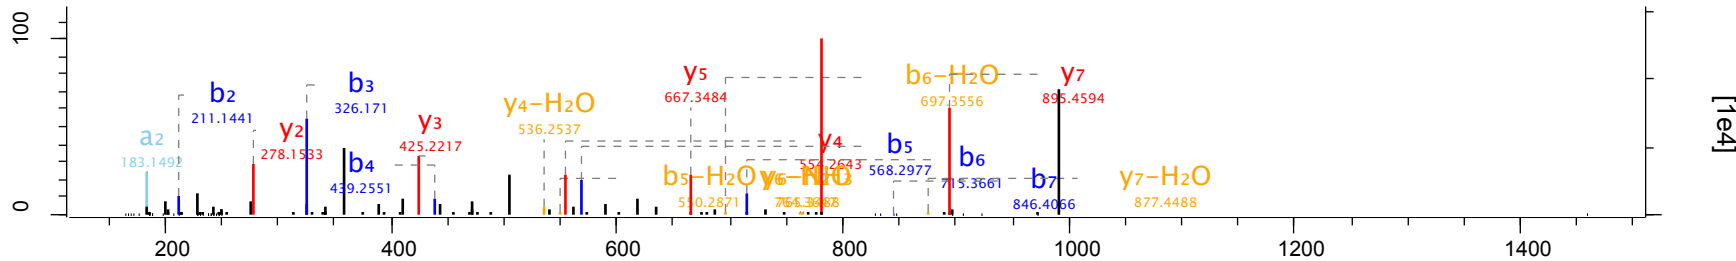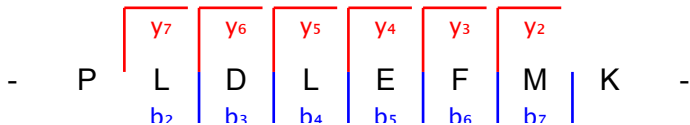

Raw file

20140925\_fract2\_dyn\_5ul\_B2\_01\_437

Scan

30785

Method

TOF; CID

Score

99.44

m/z

534.25

Gene names

HYAL1

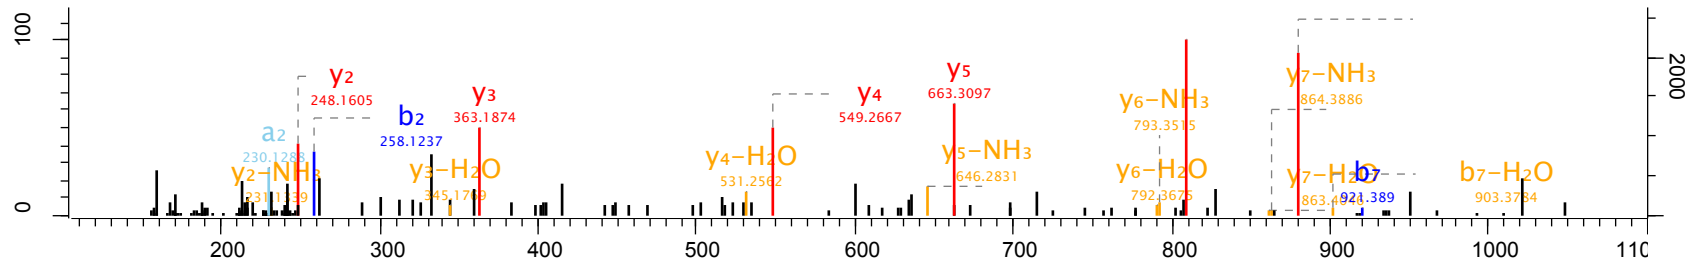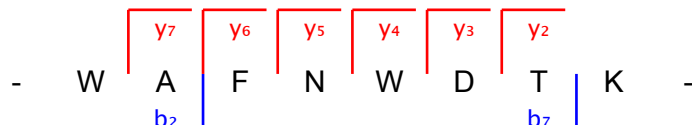

Raw file

20140925\_fract2\_dyn\_5ul\_B2\_01\_437

Scan

31476

Method

TOF; CID

Score

74.3

m/z

508.62

Gene names

GABPB1

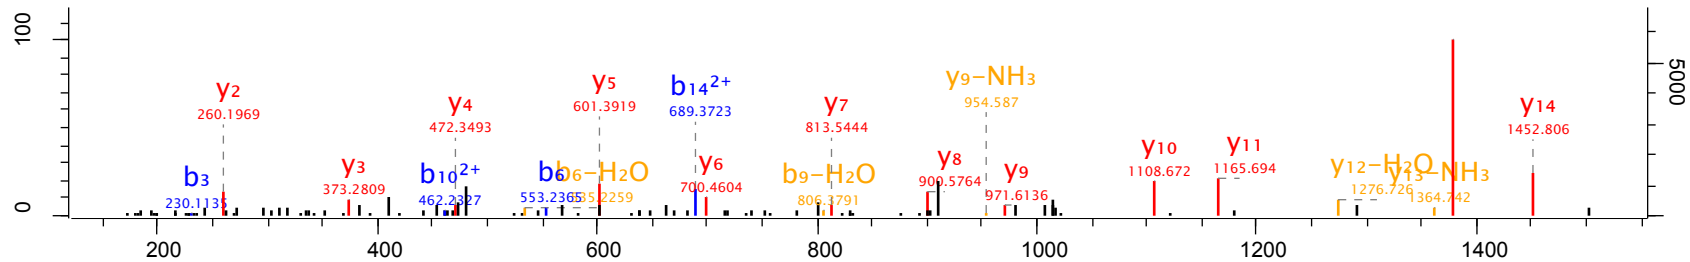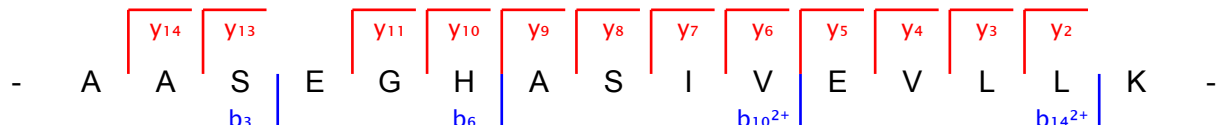

Raw file

20140925\_fract2\_dyn\_5ul\_B2\_01\_437

Scan

33699

Method

TOF; CID

Score

97.22

m/z

583.3

Gene names

TMEM138

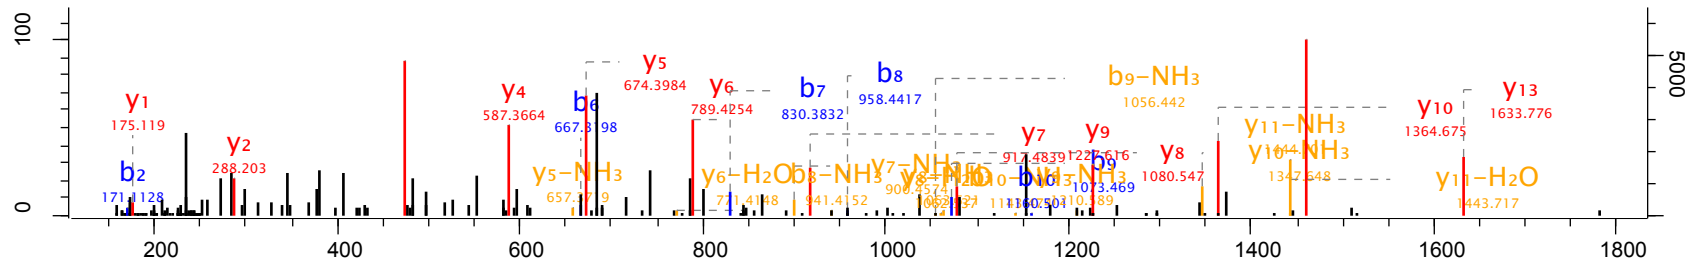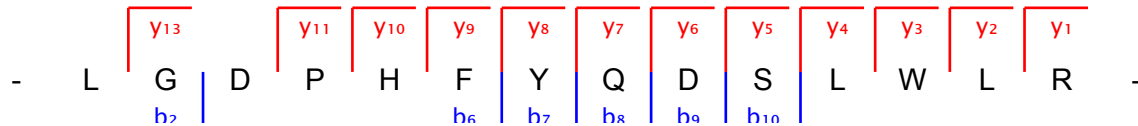

Raw file

20140925\_fract2\_dyn\_5ul\_B2\_01\_437

Scan

36475

Method

TOF; CID

Score

29.84

m/z

984.49

Gene names

HOXC5

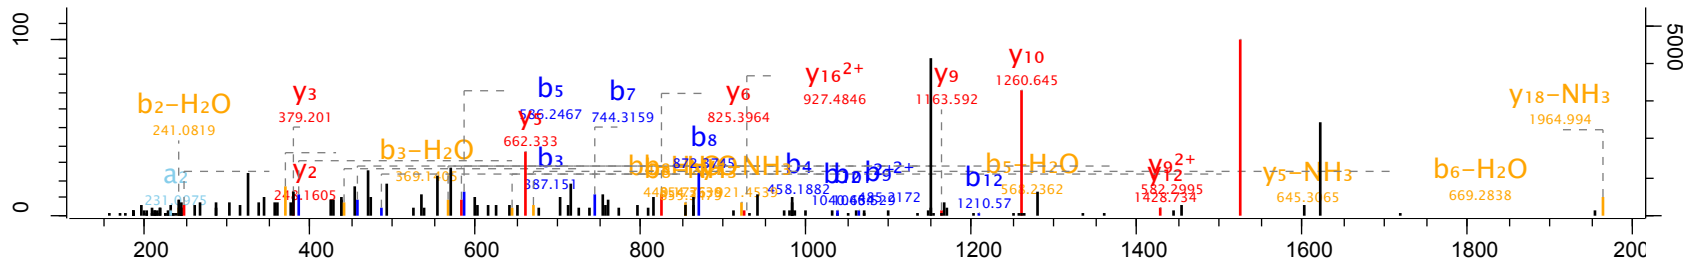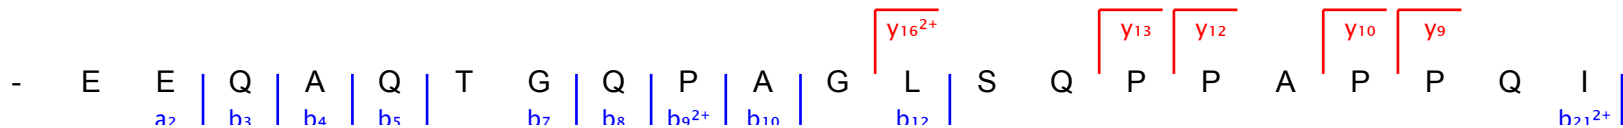

Raw file

20140925\_fract2\_dyn\_5ul\_B2\_01\_437

Scan

36693

Method

TOF; CID

Score

74.46

m/z

580.84

Gene names

ZBED9

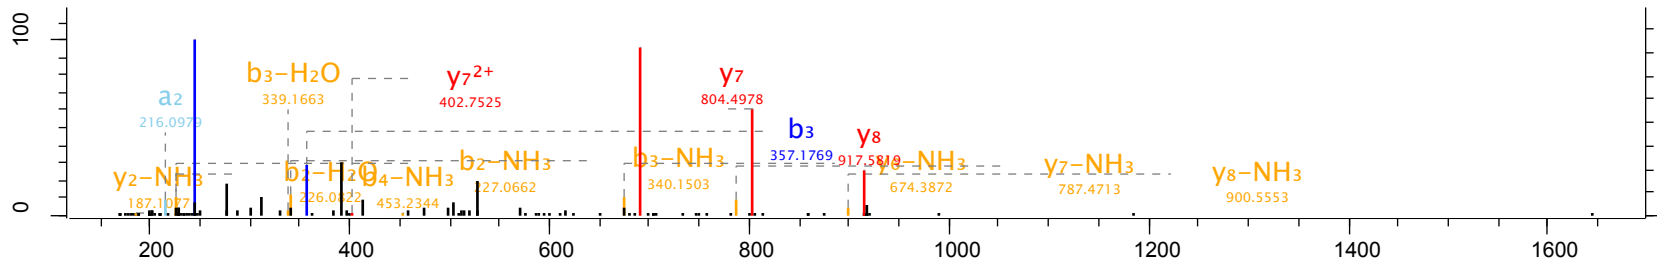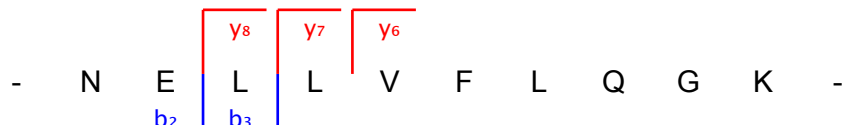



Raw file

20140925\_fract2\_dyn\_5ul\_B2\_01\_437

Scan

37413

Method

TOF; CID

Score

73.92

m/z

972.02

Gene names

SLC10A7

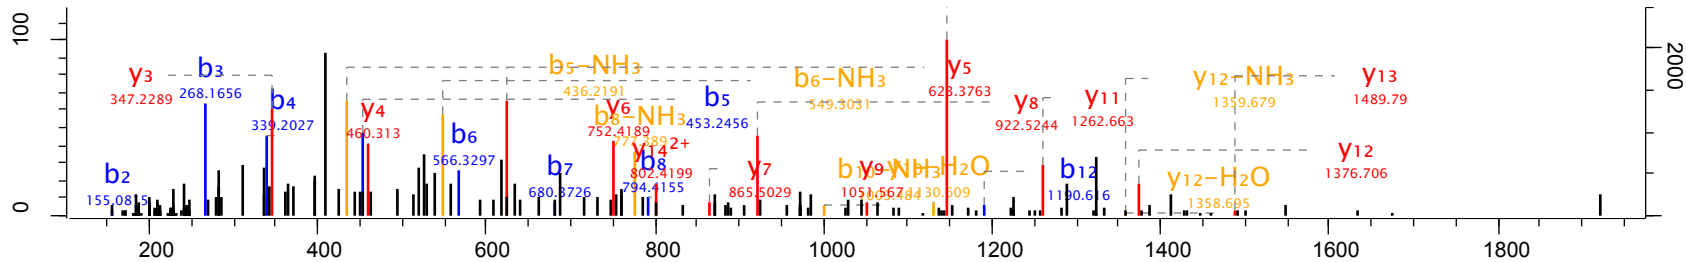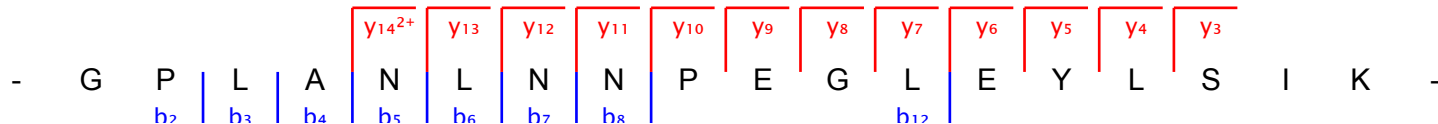

Raw file

20140925\_fract2\_dyn\_5ul\_B2\_01\_437

Scan

41459

Method

TOF; CID

Score

47.69

m/z

1020.5

Gene names

LSM5

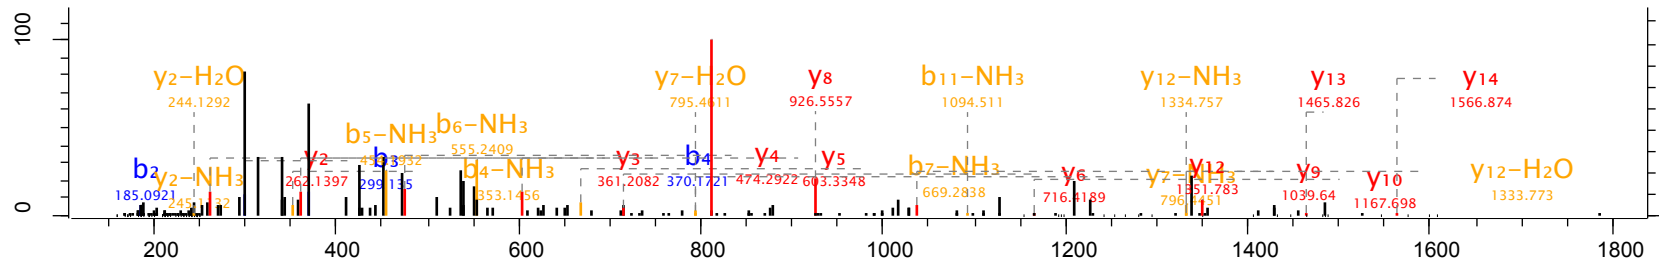

ac

-

A

A

N

A

T

T

N

P

S

Q

L

L

P

L

E

L

V

D

K

-

y<sub>14</sub>y<sub>13</sub>y<sub>12</sub>y<sub>10</sub>y<sub>9</sub>y<sub>8</sub>y<sub>7</sub>y<sub>6</sub>y<sub>5</sub>y<sub>4</sub>y<sub>3</sub>y<sub>2</sub>b<sub>2</sub>y<sub>2</sub>-NH<sub>3</sub>

245.1132

262.1397

453.3952

299.135

353.1456

361.2082

370.1721

474.2922

603.3348

669.2838

716.4189

796.4451

795.4611

926.5557

1039.64

1167.698

1465.826

1566.874

1333.773

y<sub>2</sub>-H<sub>2</sub>O

244.1292

262.1397

453.3952

299.135

353.1456

361.2082

370.1721

474.2922

603.3348

669.2838

716.4189

796.4451

795.4611

926.5557

1039.64

1167.698

1465.826

1566.874

1333.773

100

0

200

400

600

800

1000

1200

1400

1600

1800

Raw file

20140925\_fract3\_dyn\_5ul\_B3\_01\_438

Scan

2670

Method

TOF; CID

Score

101.39

m/z

452.21

Gene names

MT-CO3

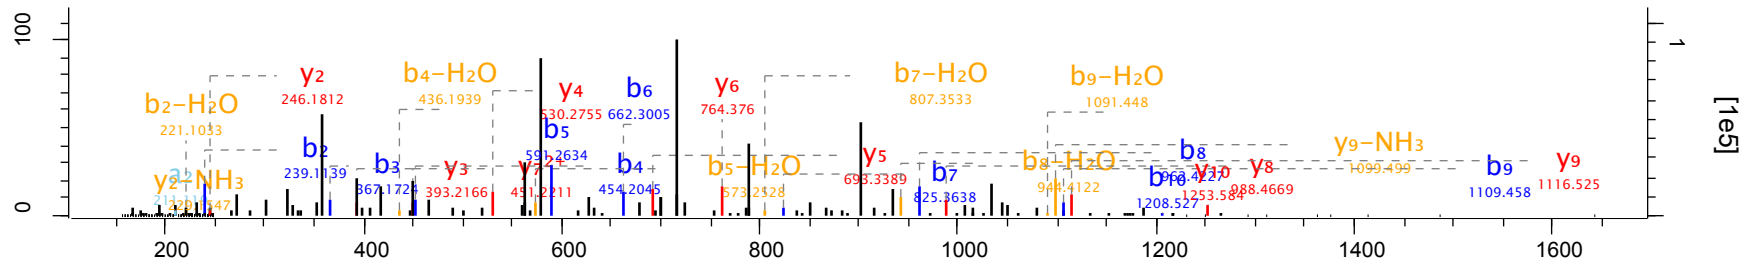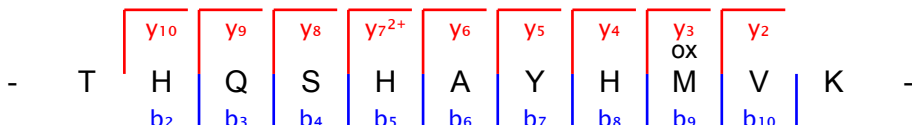

Raw file

Scan

Method

Score

m/z

Gene names

20140925\_fract3\_dyn\_5ul\_B3\_01\_438

8033

TOF; CID

88.06

521.79

HIPK3

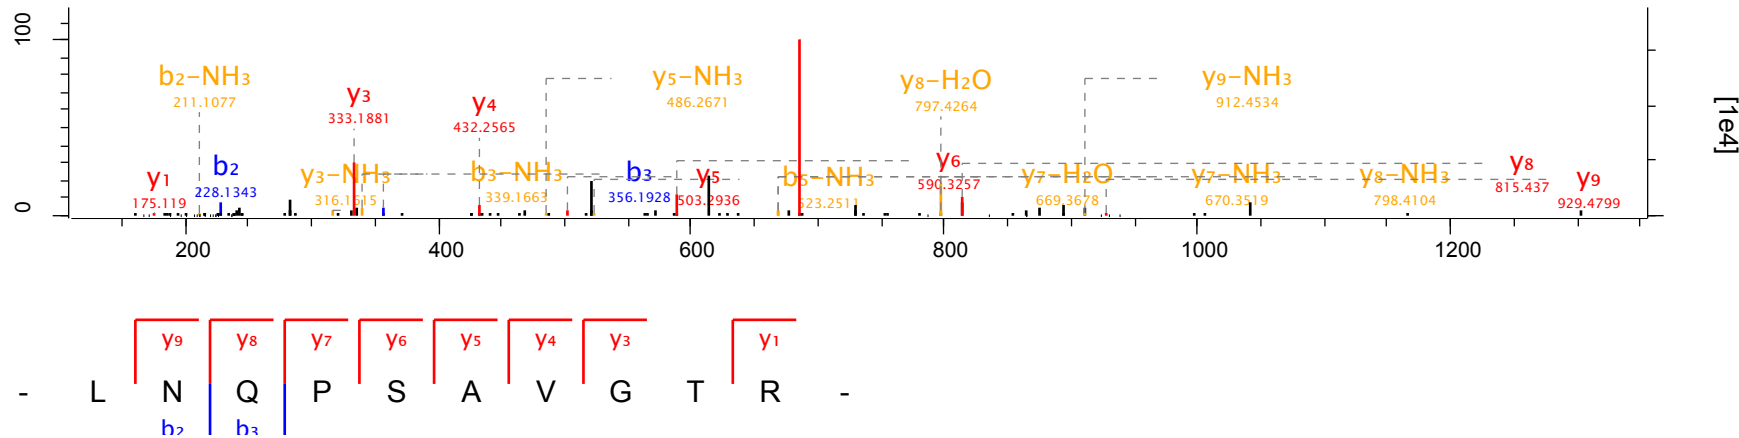

Raw file

20140925\_fract3\_dyn\_5ul\_B3\_01\_438

Scan

12301

Method

TOF; CID

Score

61.78

m/z

582.78

Gene names

CCDC151

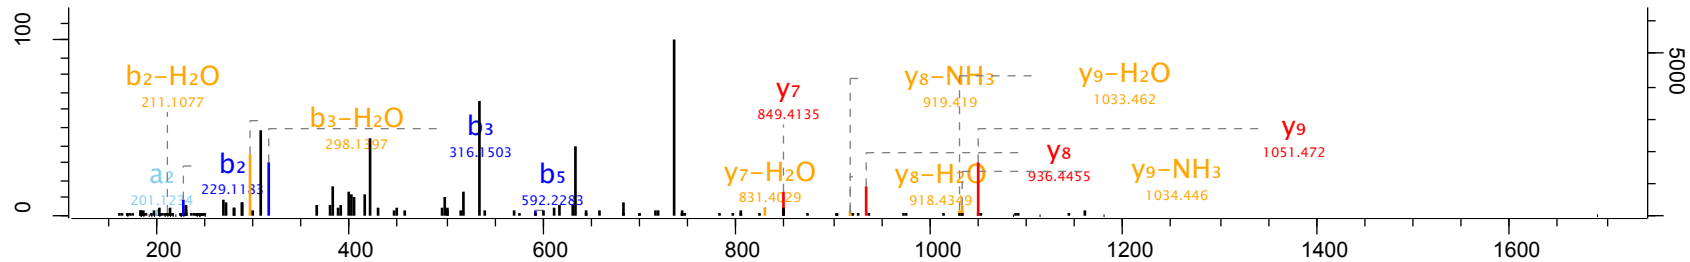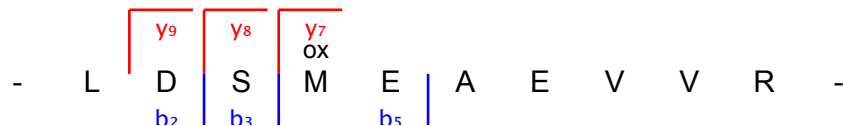

| Raw file                          | Scan  | Method   | Score | m/z    | Gene names |
|-----------------------------------|-------|----------|-------|--------|------------|
| 20140925_fract3_dyn_5ul_B3_01_438 | 12772 | TOF; CID | 91.09 | 499.72 | PIGH       |

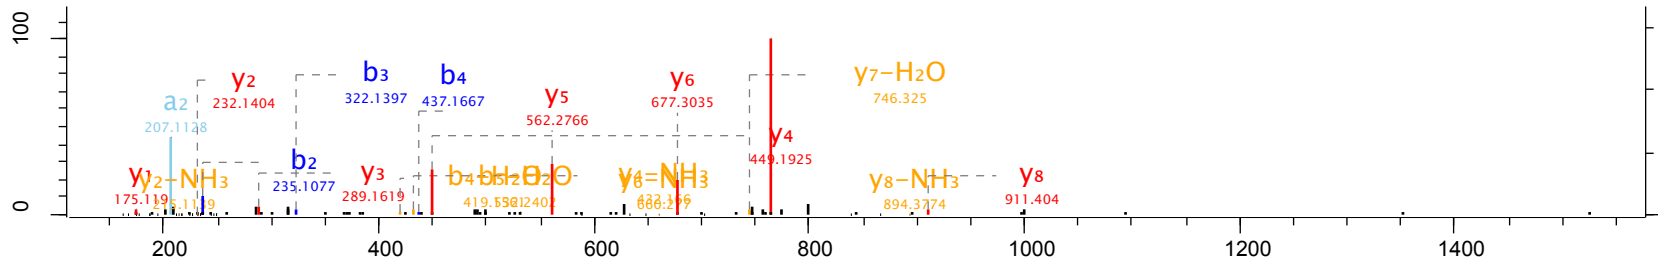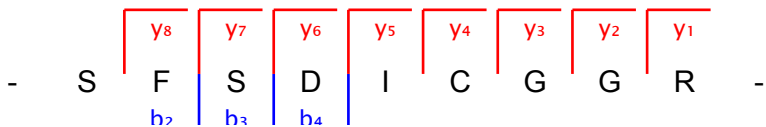

Raw file

20140925\_fract3\_dyn\_5ul\_B3\_01\_438

Scan

14078

Method

TOF; CID

Score

122.33

m/z

630.83

Gene names

TFDP2

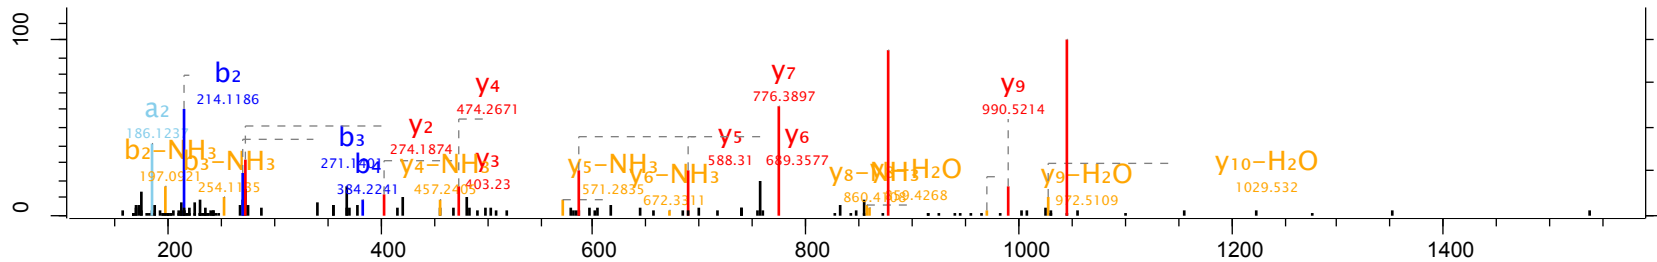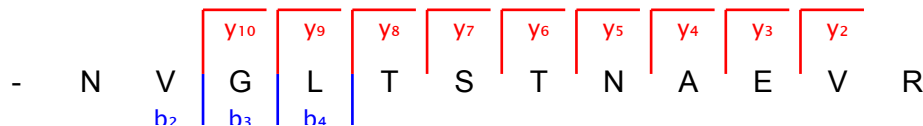

| Raw file                          | Scan  | Method   | Score  | m/z    | Gene names |
|-----------------------------------|-------|----------|--------|--------|------------|
| 20140925_fract3_dyn_5ul_B3_01_438 | 17414 | TOF; CID | 120.57 | 692.83 | SLPI       |

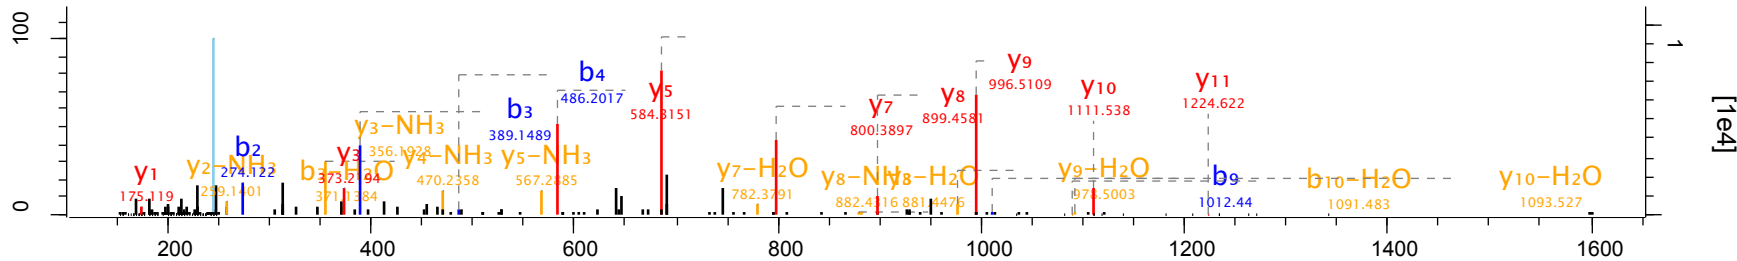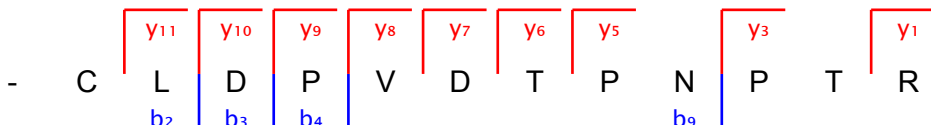



Raw file

20140925\_fract3\_dyn\_5ul\_B3\_01\_438

Scan

17637

Method

TOF; CID

Score

33.32

m/z

778.38

Gene names

FXVD5

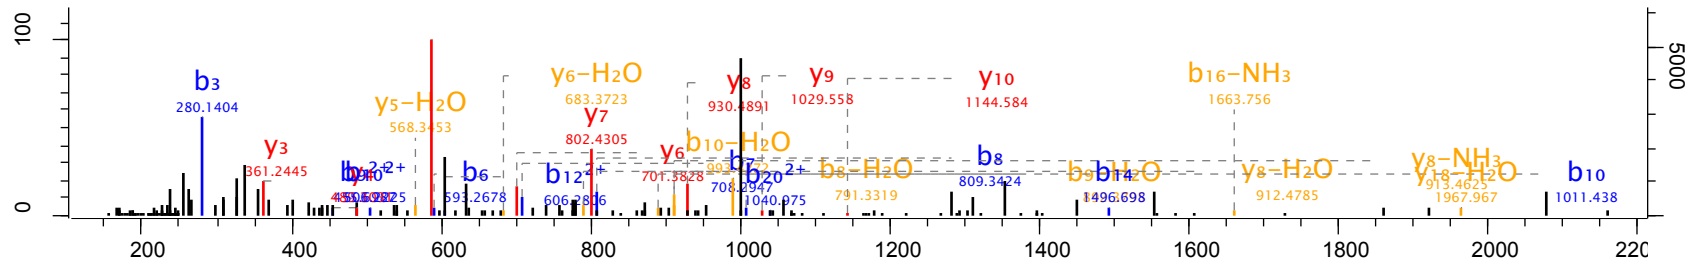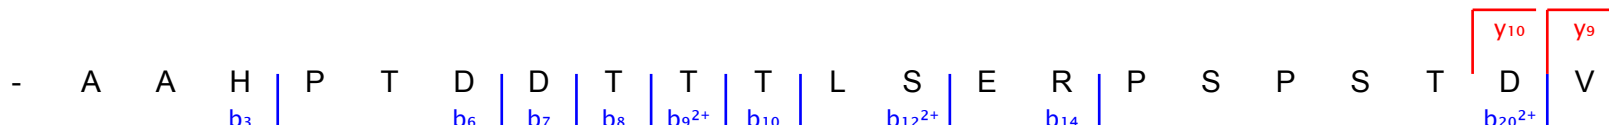

Raw file

20140925\_fract3\_dyn\_5ul\_B3\_01\_438

Scan

21328

Method

TOF; CID

Score

69.75

m/z

764.63

Gene names

SMIM14

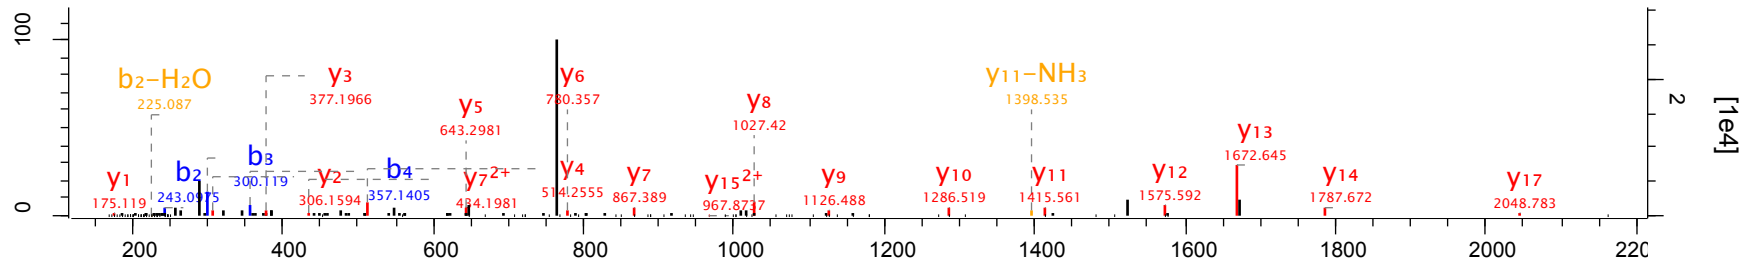

ac

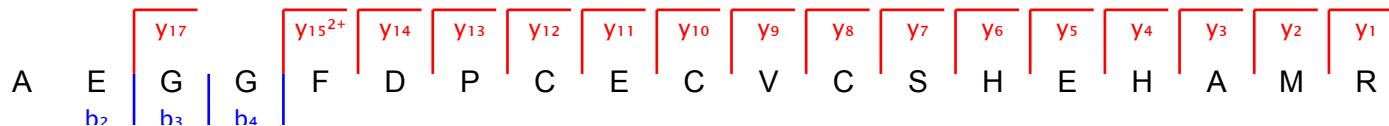

Raw file

Scan

Method

Score

m/z

Gene names

20140925\_fract3\_dyn\_5ul\_B3\_01\_438

23720

TOF; CID

91.87

553.32

WBP5

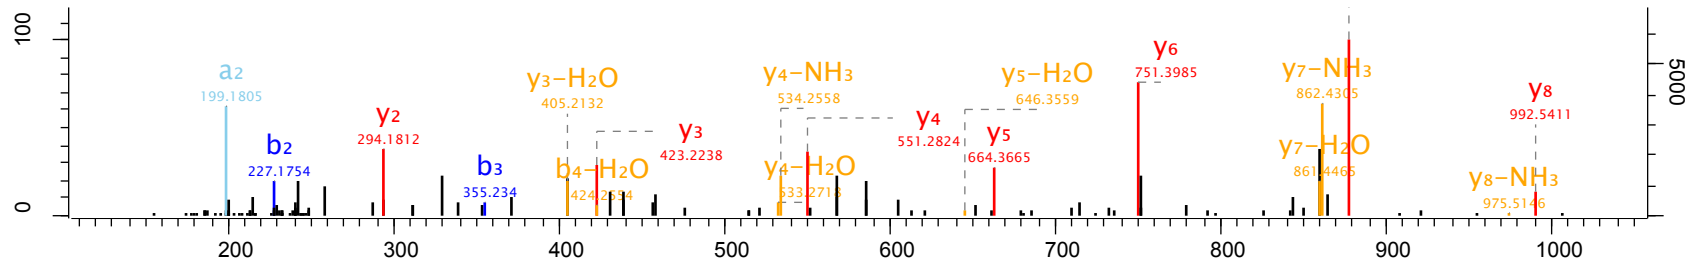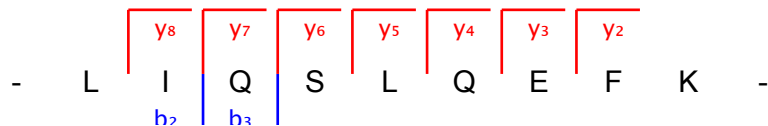

Raw file

20140925\_fract3\_dyn\_5ul\_B3\_01\_438

Scan

26331

Method

TOF; CID

Score

114.27

m/z

578.3

Gene names

MBLAC1

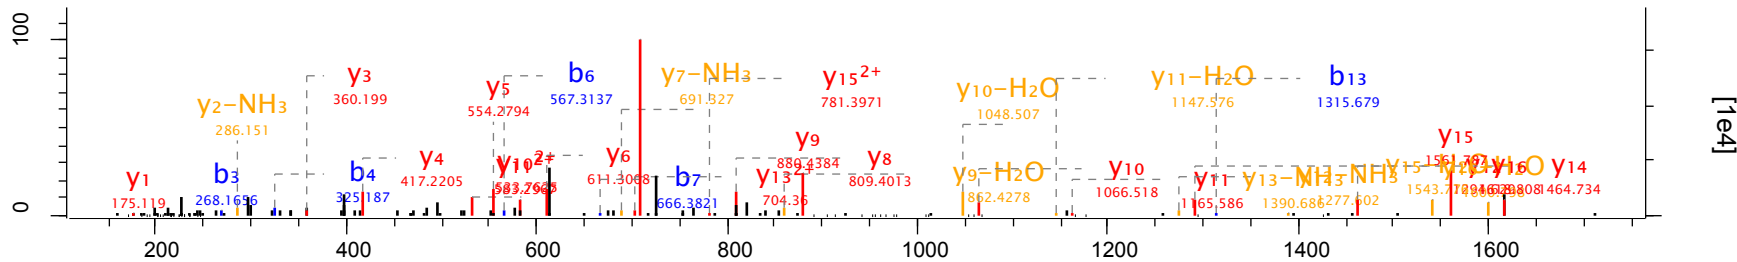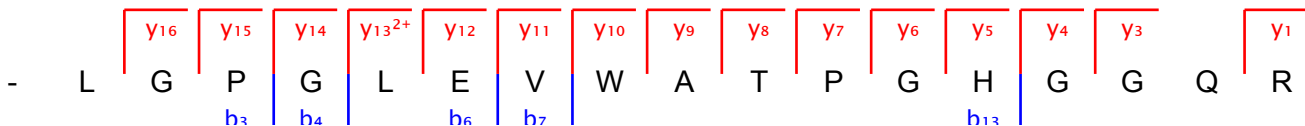

Raw file

20140925\_fract3\_dyn\_5ul\_B3\_01\_438

Scan

27630

Method

TOF; CID

Score

62.29

m/z

727.38

Gene names

NUDT14

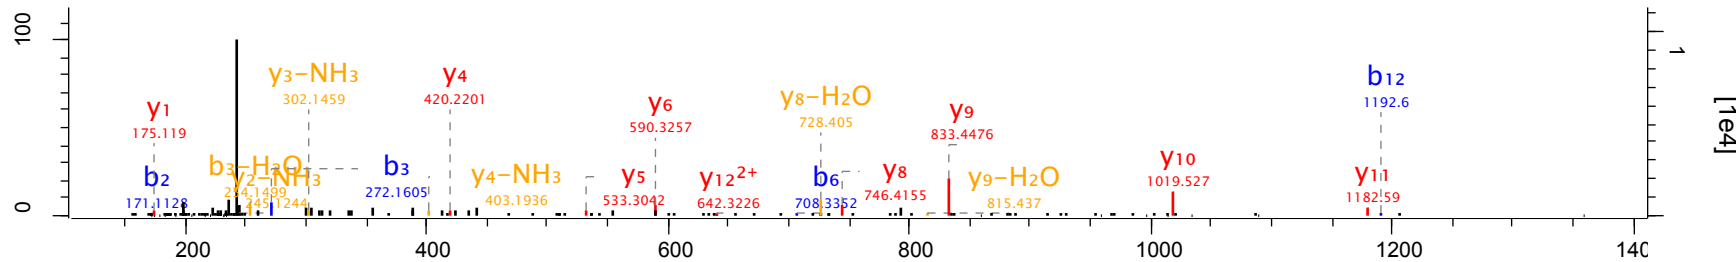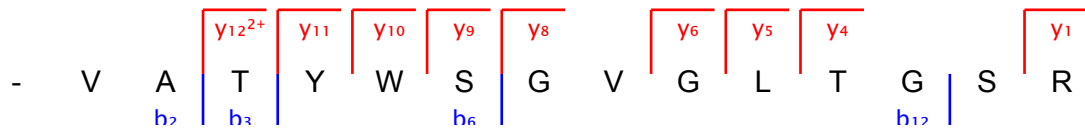

| Raw file                          | Scan  | Method   | Score | m/z    | Gene names |
|-----------------------------------|-------|----------|-------|--------|------------|
| 20140925_fract3_dyn_5ul_B3_01_438 | 28767 | TOF; CID | 91.32 | 585.28 | SNX10      |

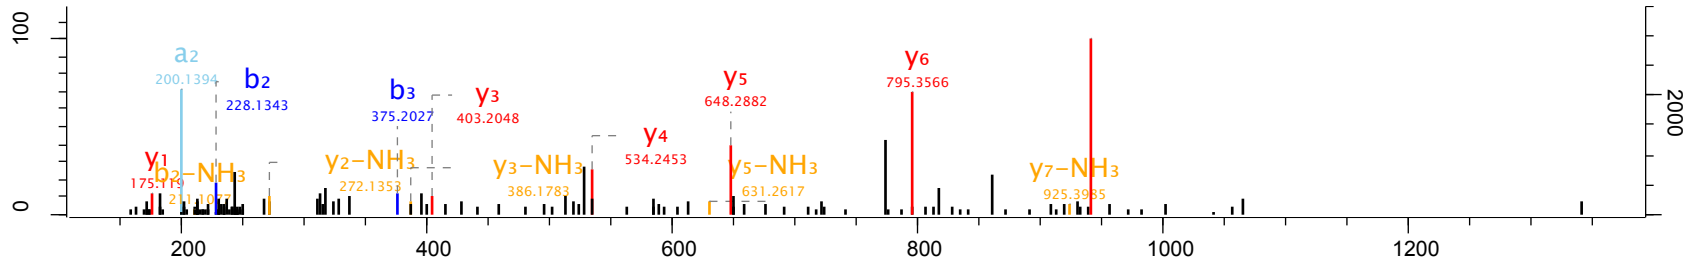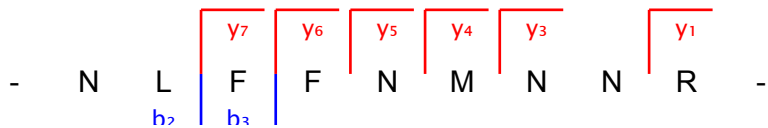

| Raw file                          | Scan  | Method   | Score | m/z    | Gene names |
|-----------------------------------|-------|----------|-------|--------|------------|
| 20140925_fract3_dyn_5ul_B3_01_438 | 28783 | TOF; CID | 90.23 | 766.88 | C2orf76    |

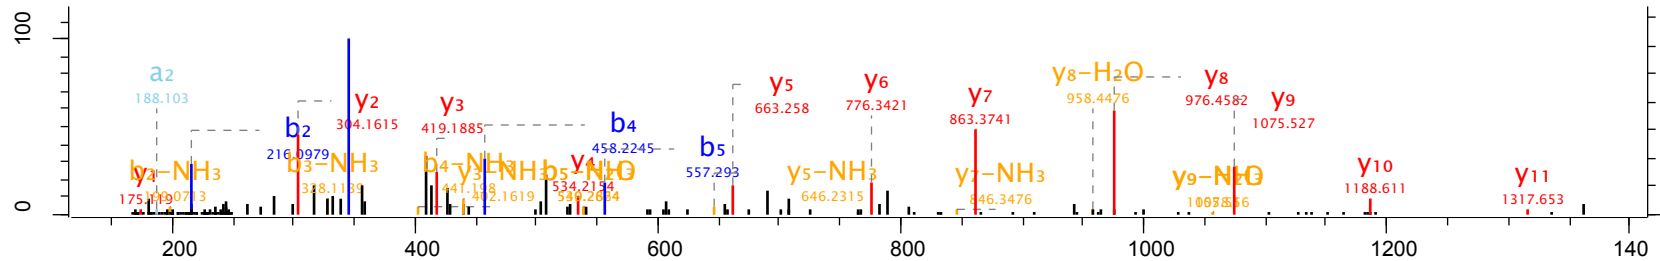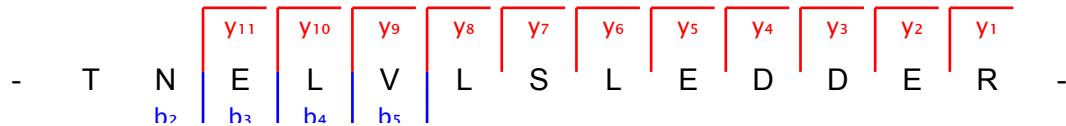

| Raw file                          | Scan  | Method   | Score | m/z    | Gene names |
|-----------------------------------|-------|----------|-------|--------|------------|
| 20140925_fract3_dyn_5ul_B3_01_438 | 30492 | TOF; CID | 93.35 | 576.34 | MAL2       |

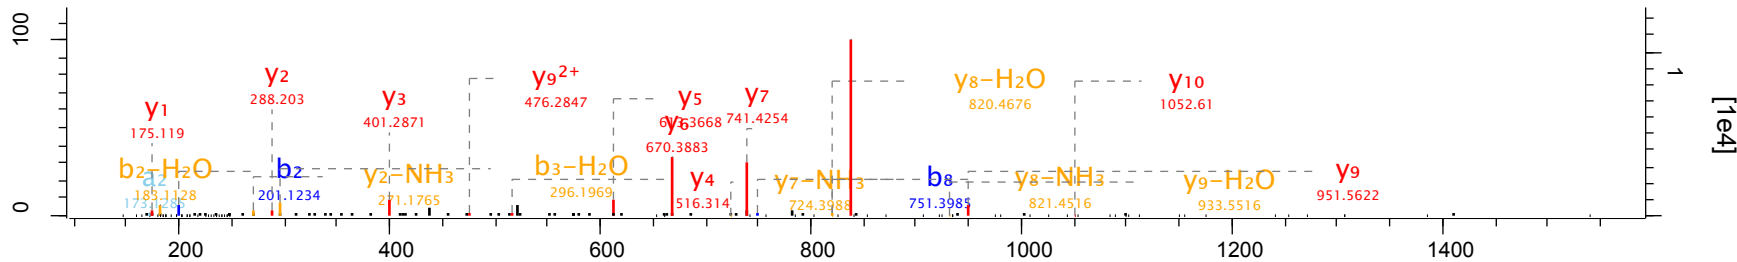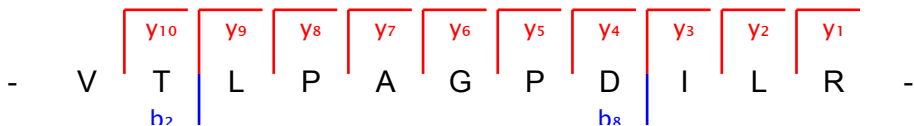



Raw file

20140925\_fract3\_dyn\_5ul\_B3\_01\_438

Scan

32375

Method

TOF; CID

Score

92.26

m/z

996.91

Gene names

CLDN7

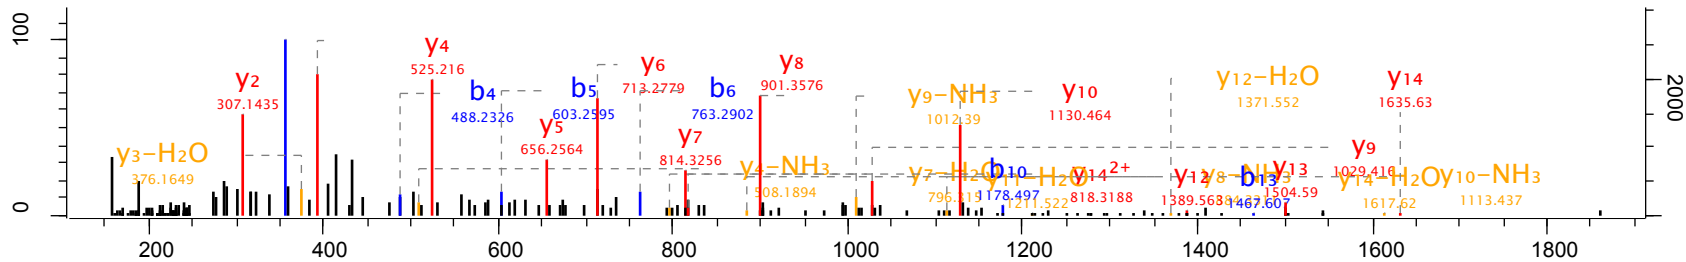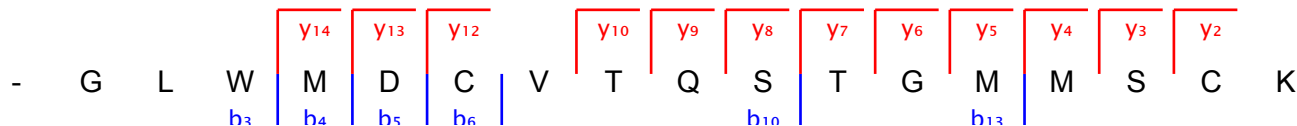

| Raw file                          | Scan  | Method   | Score | m/z    | Gene names |
|-----------------------------------|-------|----------|-------|--------|------------|
| 20140925_fract3_dyn_5ul_B3_01_438 | 34833 | TOF; CID | 37.29 | 717.02 | ULBP3      |

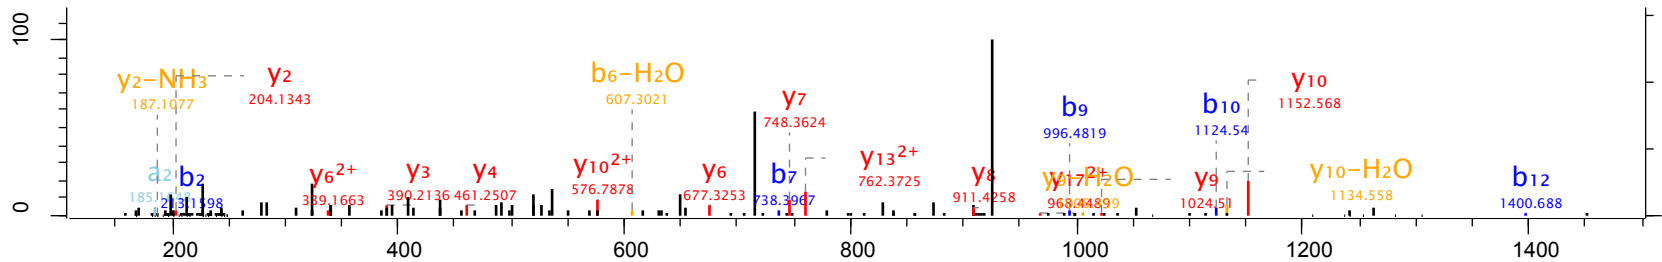

Protein sequence: - V L S M G H L E E Q L Y A T D A W G K -

Fragmentation sites (b-ions):  $b_2$  (under L),  $b_7$  (under L),  $b_9$  (under E),  $b_{10}$  (under Q),  $b_{12}$  (under Y), and  $b_{12}$  (under A).

Fragmentation sites (y-ions):  $y_{17}^{2+}$  (above S),  $y_{13}^{2+}$  (above L),  $y_{10}$  (above Q),  $y_9$  (above L),  $y_8$  (above Y),  $y_7$  (above A),  $y_6$  (above T),  $y_4$  (above A),  $y_3$  (above W), and  $y_2$  (above G).

[1e4]

| Raw file                          | Scan  | Method   | Score  | m/z   | Gene names |
|-----------------------------------|-------|----------|--------|-------|------------|
| 20140925_fract3_dyn_5ul_B3_01_438 | 35387 | TOF; CID | 103.55 | 568.8 | MT-ND2     |

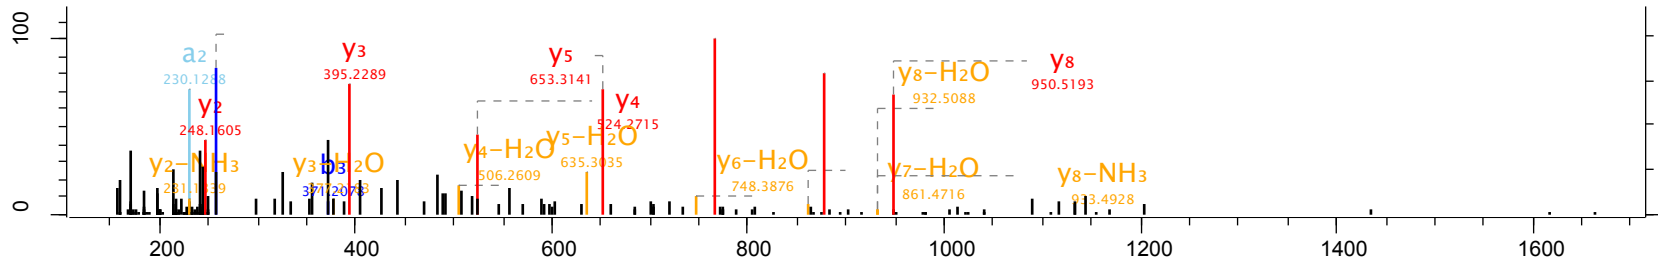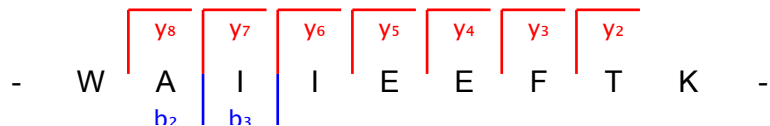

| Raw file                          | Scan  | Method   | Score | m/z     | Gene names |
|-----------------------------------|-------|----------|-------|---------|------------|
| 20140925_fract3_dyn_5ul_B3_01_438 | 37800 | TOF; CID | 43.33 | 1050.54 | CLN8       |

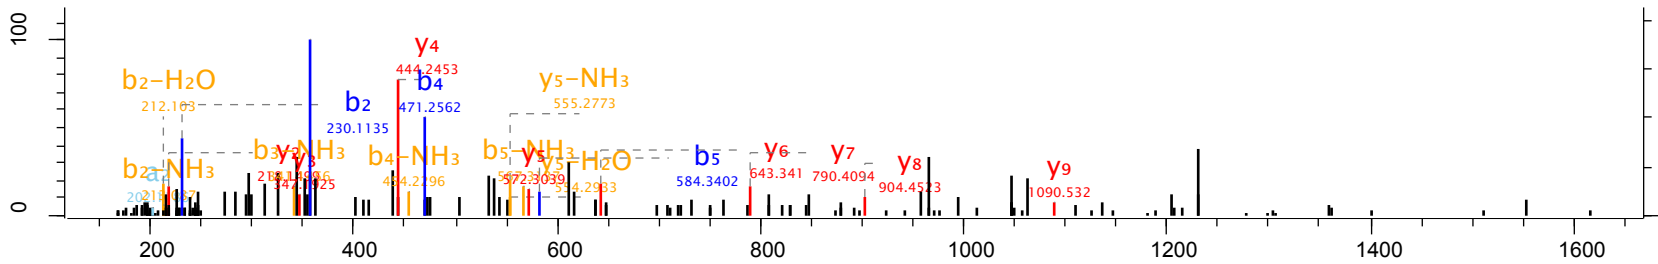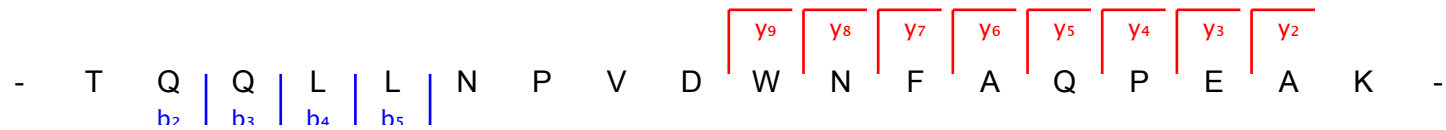

Raw file

20140925\_fract3\_dyn\_5ul\_B3\_01\_438

Scan

38323

Method

TOF; CID

Score

58.1

m/z

776.9

Gene names

TPRA1

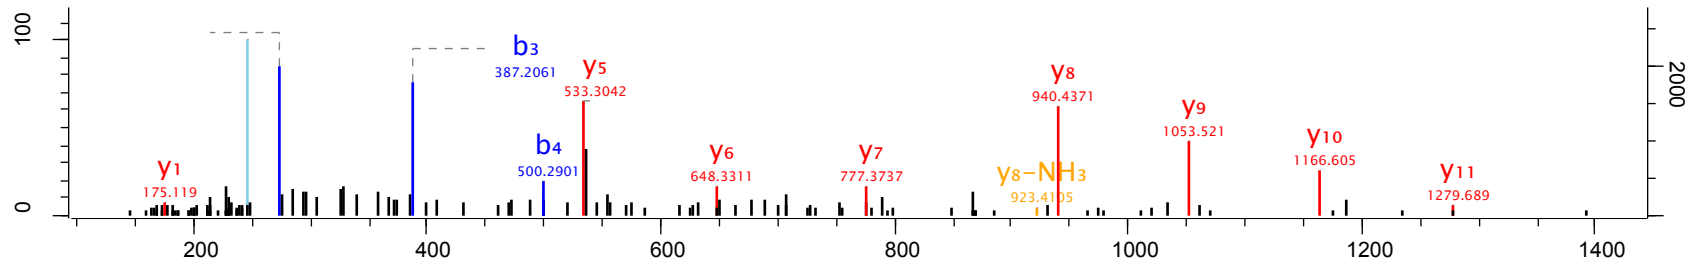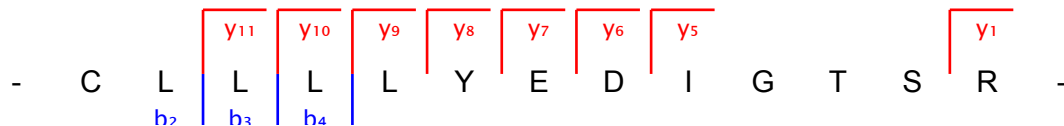

Raw file

20140925\_fract4\_dyn\_5ul\_B4\_01\_439

Scan

3443

Method

TOF; CID

Score

69.93

m/z

541.27

Gene names

KIAA1958

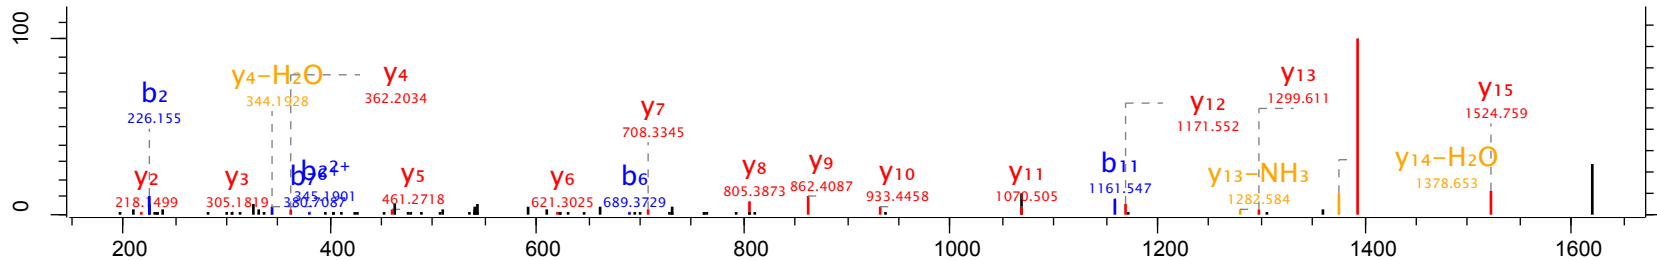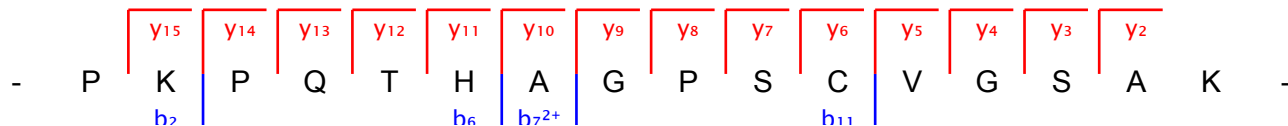

Raw file

20140925\_fract4\_dyn\_5ul\_B4\_01\_439

Scan

3804

Method

TOF; CID

Score

116.37

m/z

438.2

Gene names

SMOC2

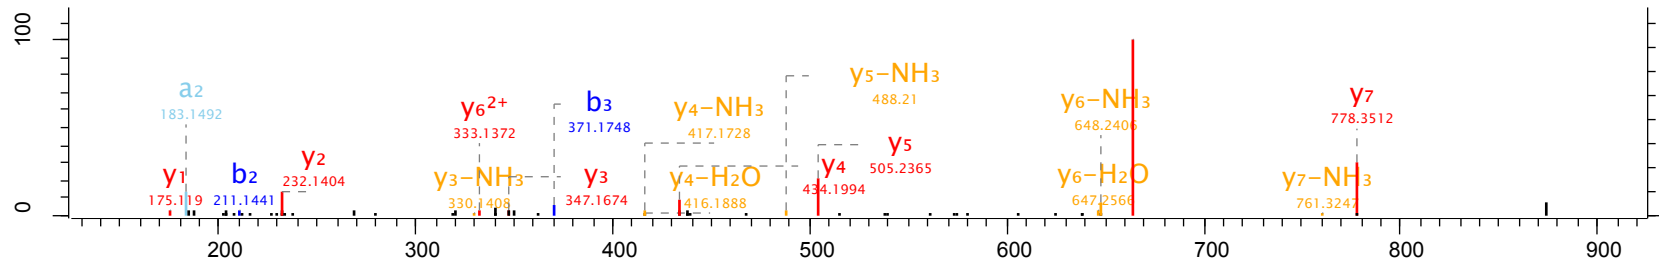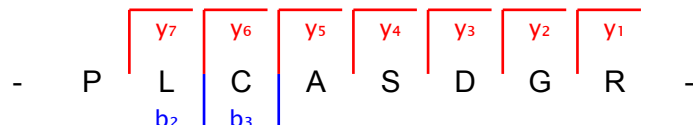

Raw file

20140925\_fract4\_dyn\_5ul\_B4\_01\_439

Scan

5237

Method

TOF; CID

Score

74.84

m/z

564.78

Gene names

TET2

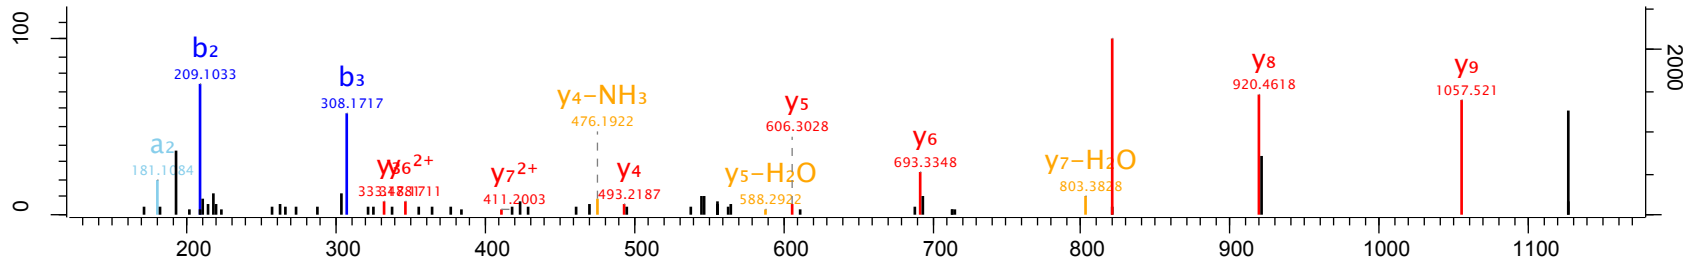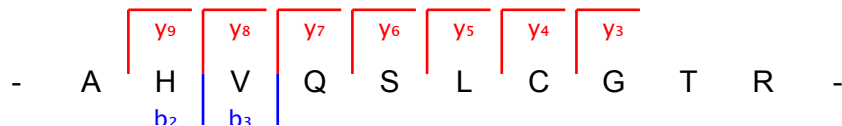



| Raw file                          | Scan | Method   | Score | m/z    | Gene names |
|-----------------------------------|------|----------|-------|--------|------------|
| 20140925_fract4_dyn_5ul_B4_01_439 | 7060 | TOF; CID | 87.18 | 601.28 | ZBTB1      |

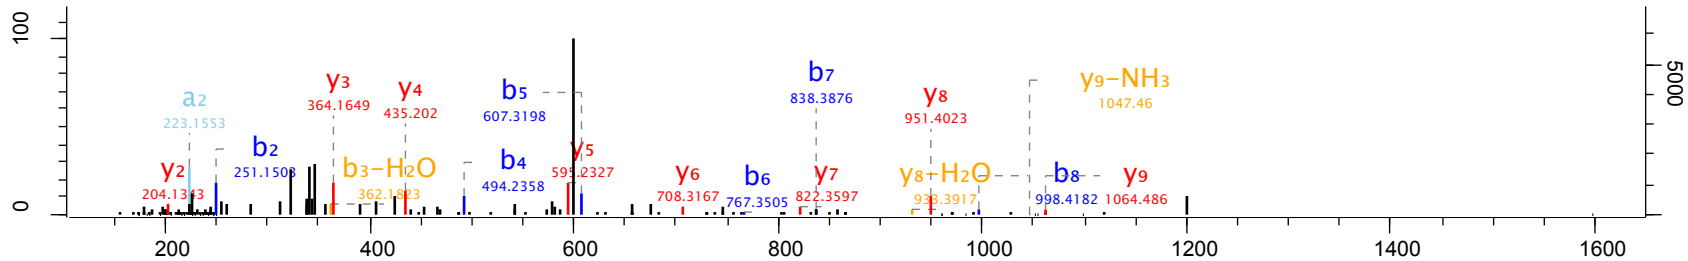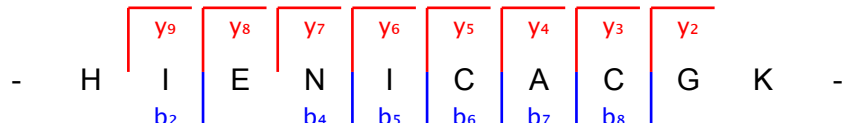

| Raw file                          | Scan | Method   | Score | m/z    | Gene names |
|-----------------------------------|------|----------|-------|--------|------------|
| 20140925_fract4_dyn_5ul_B4_01_439 | 7355 | TOF; CID | 54.9  | 735.37 | RWDD3      |

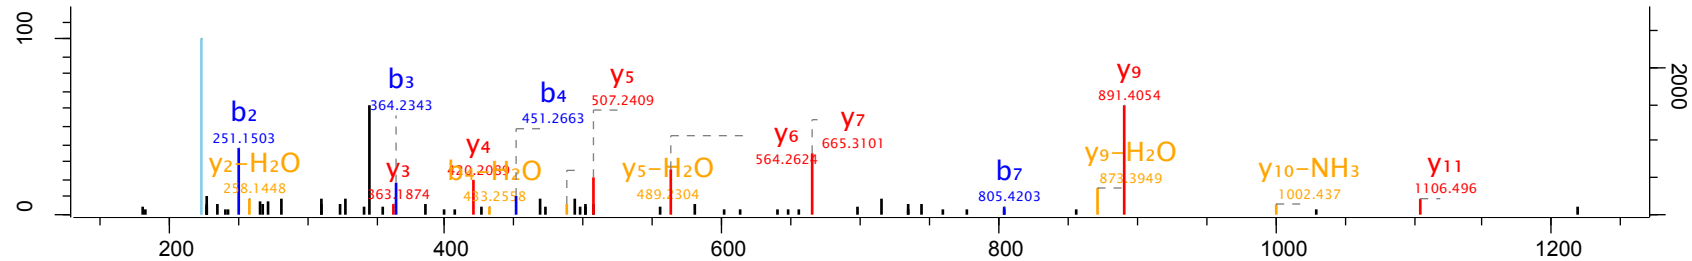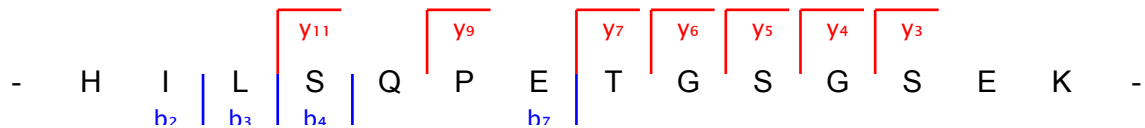

| Raw file                          | Scan | Method   | Score | m/z    | Gene names |
|-----------------------------------|------|----------|-------|--------|------------|
| 20140925_fract4_dyn_5ul_B4_01_439 | 7838 | TOF; CID | 78.26 | 571.25 | ZFP3       |

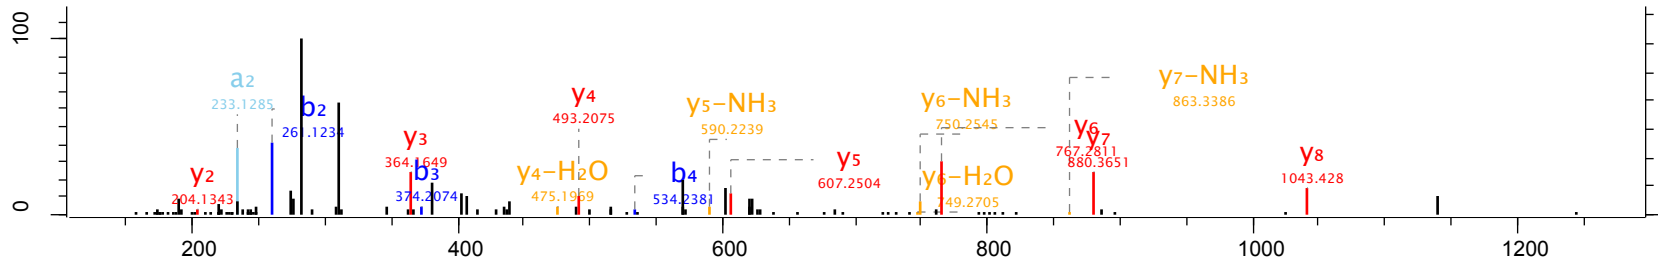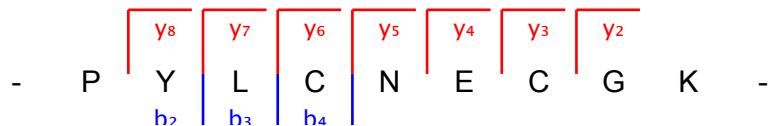

Raw file

20140925\_fract4\_dyn\_5ul\_B4\_01\_439

Scan

8052

Method

TOF; CID

Score

54.34

m/z

464.54

Gene names

DPM3

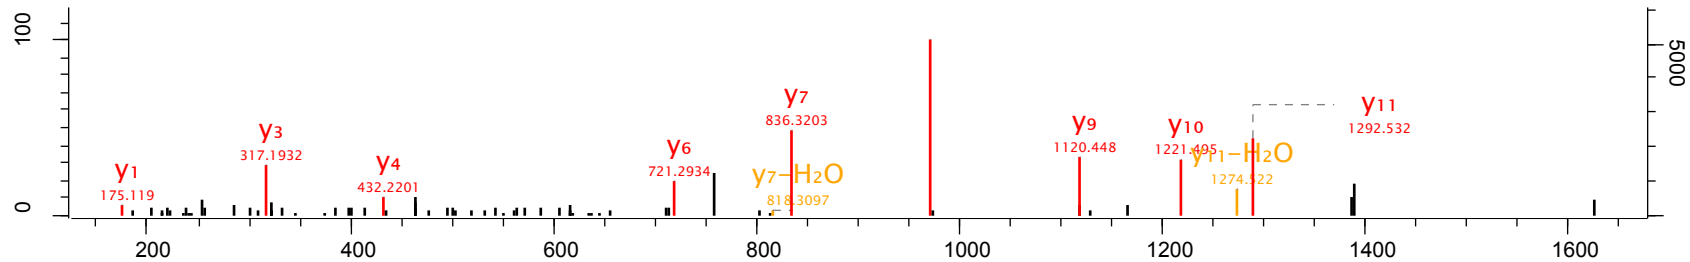

- V A T F H D C E D A A R -

Red brackets above the sequence indicate the fragmentation sites for the y-ions: y11 (A-T), y10 (T-F), y9 (F-H), y8 (H-D), y7 (D-C), y6 (C-E), y4 (D-E), y3 (E-A), and y1 (A-R).

| Raw file                          | Scan  | Method   | Score  | m/z    | Gene names |
|-----------------------------------|-------|----------|--------|--------|------------|
| 20140925_fract4_dyn_5ul_B4_01_439 | 12391 | TOF; CID | 142.08 | 459.56 | CYB561D2   |

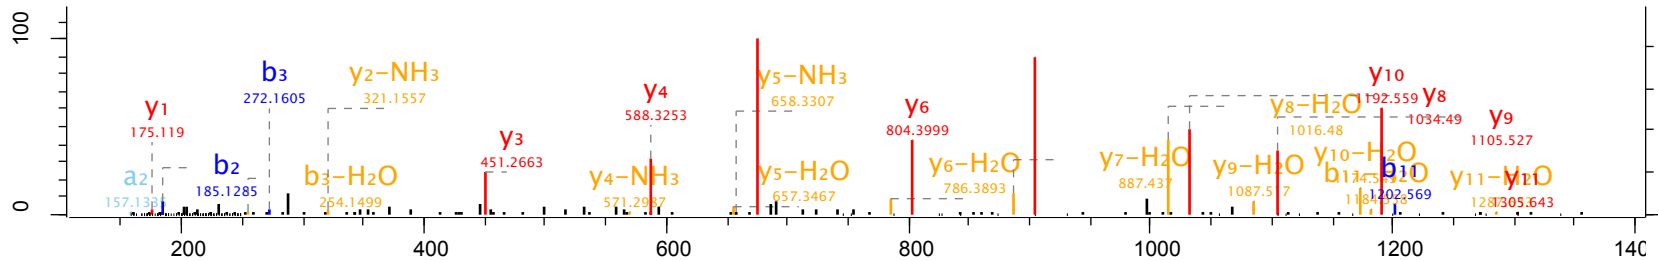

- A L S A E T E S H I Y R -

b<sub>2</sub> b<sub>3</sub> b<sub>11</sub>

y<sub>11</sub> y<sub>10</sub> y<sub>9</sub> y<sub>8</sub> y<sub>7</sub> y<sub>6</sub> y<sub>5</sub> y<sub>4</sub> y<sub>3</sub> y<sub>1</sub>

| Raw file                          | Scan  | Method   | Score | m/z    | Gene names       |
|-----------------------------------|-------|----------|-------|--------|------------------|
| 20140925_fract4_dyn_5ul_B4_01_439 | 12557 | TOF; CID | 144.1 | 577.32 | PLEKHG4;CYB561A3 |

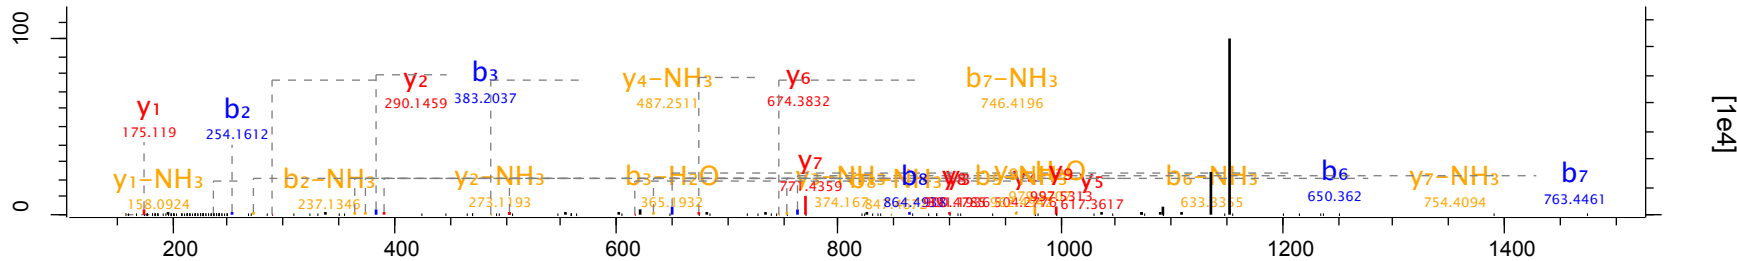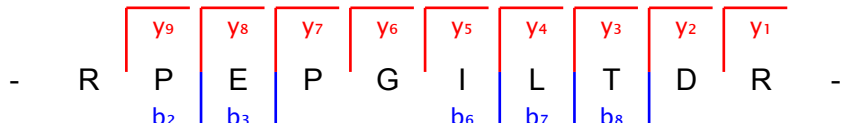

Raw file

Scan

Method

Score

m/z

Gene names

20140925\_fract4\_dyn\_5ul\_B4\_01\_439

17334

TOF; CID

85.81

658.84

ZMYM6NB

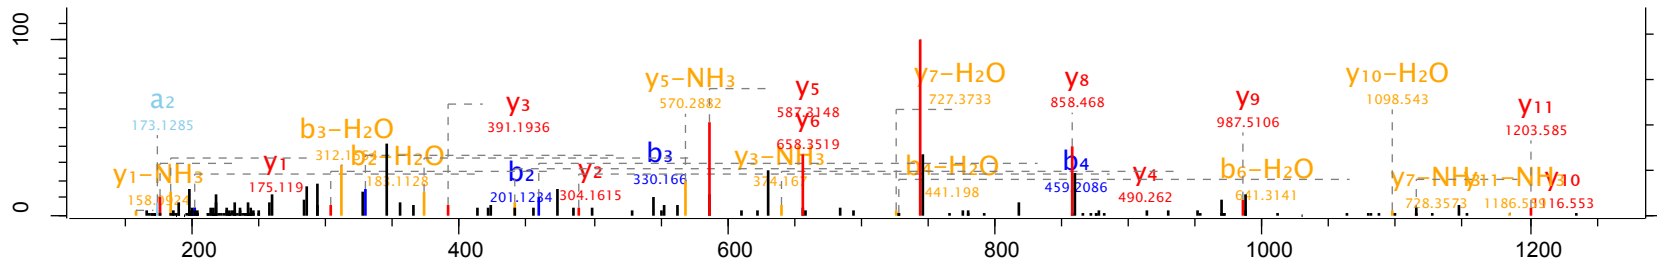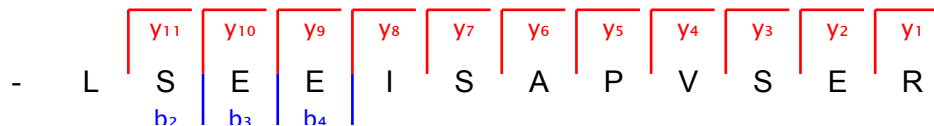

| Raw file                          | Scan  | Method   | Score | m/z    | Gene names |
|-----------------------------------|-------|----------|-------|--------|------------|
| 20140925_fract4_dyn_5ul_B4_01_439 | 19479 | TOF; CID | 79.15 | 495.79 | PORCN      |

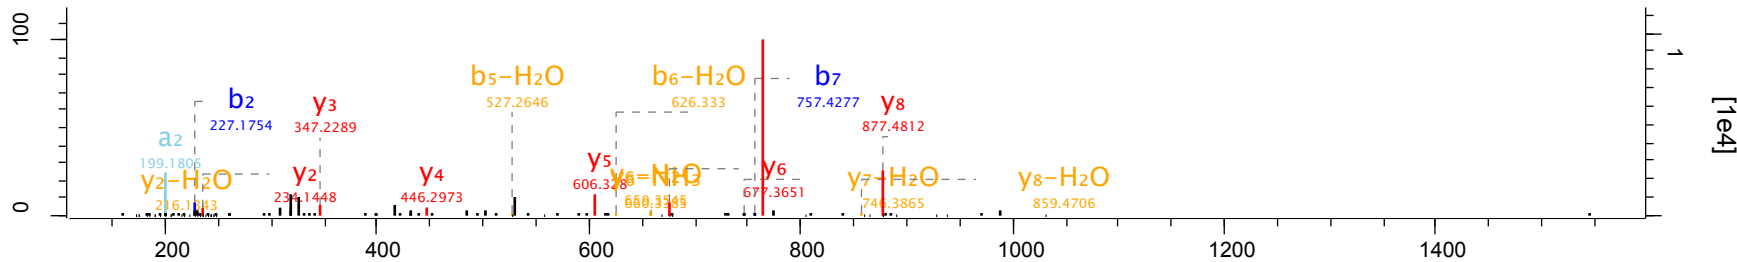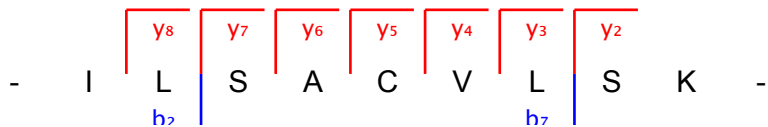



Raw file

20140925\_fract4\_dyn\_5ul\_B4\_01\_439

Scan

20342

Method

TOF; CID

Score

70.2

m/z

600.31

Gene names

C8orf37

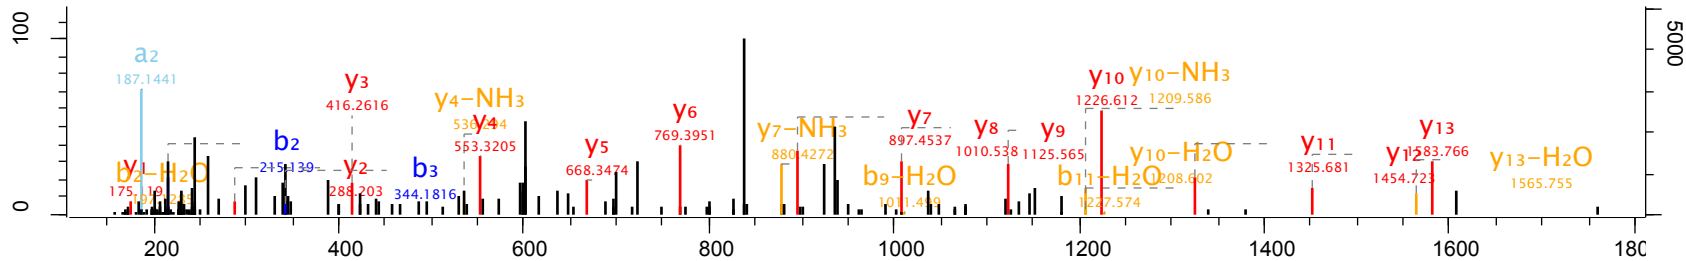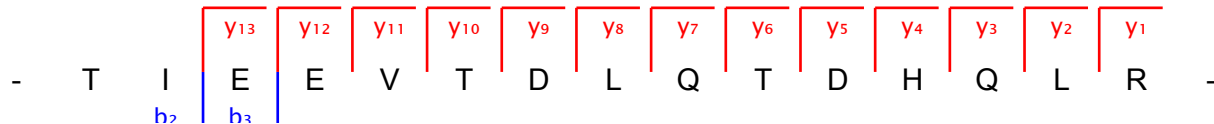

Raw file

20140925\_fract4\_dyn\_5ul\_B4\_01\_439

Scan

21878

Method

TOF; CID

Score

100.22

m/z

668.33

Gene names

DGCR6L

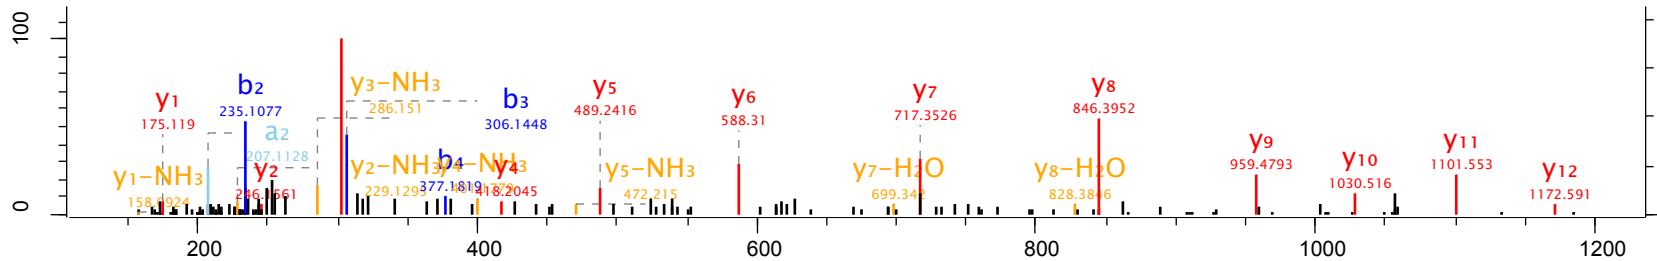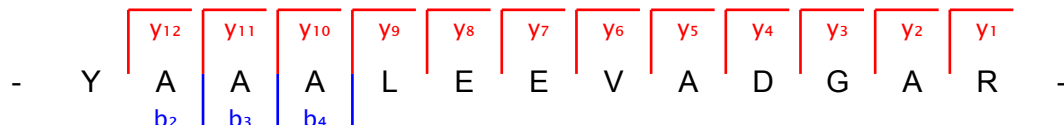

Raw file

20140925\_fract4\_dyn\_5ul\_B4\_01\_439

Scan

24369

Method

TOF; CID

Score

85.21

m/z

547.27

Gene names

RGMA

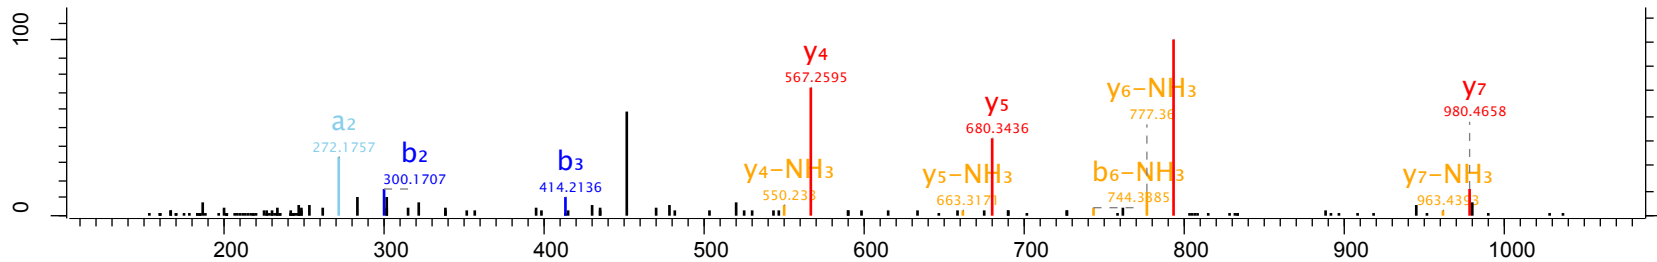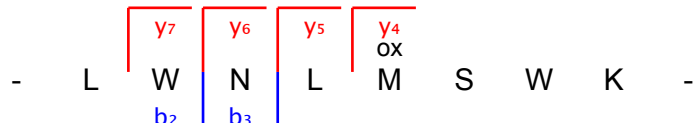

| Raw file                          | Scan  | Method   | Score | m/z    | Gene names |
|-----------------------------------|-------|----------|-------|--------|------------|
| 20140925_fract4_dyn_5ul_B4_01_439 | 26254 | TOF; CID | 38.99 | 1133.2 | TECPR1     |

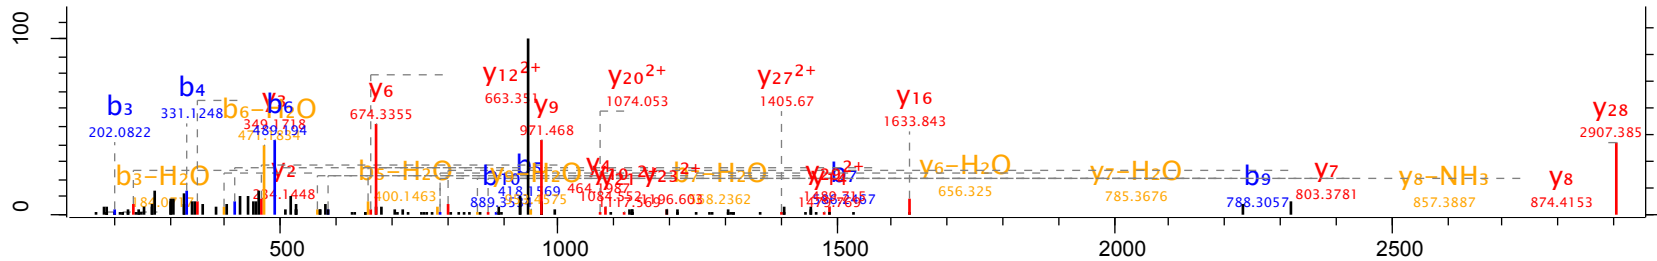

- G S G E S A P S D T D A S S E V E R P G P

h<sub>3</sub> | h<sub>4</sub> | h<sub>5</sub> | h<sub>6</sub> | h<sub>7</sub> | h<sub>9</sub> | h<sub>10</sub>

y<sub>29</sub><sup>2+</sup> | y<sub>28</sub> | y<sub>27</sub><sup>2+</sup> | y<sub>23</sub><sup>2+</sup> | y<sub>21</sub><sup>2+</sup> | y<sub>20</sub><sup>2+</sup> | y<sub>16</sub> | y<sub>14</sub>

Raw file

20140925\_fract4\_dyn\_5ul\_B4\_01\_439

Scan

29259

Method

TOF; CID

Score

112.16

m/z

1085.04

Gene names

LMBRD1

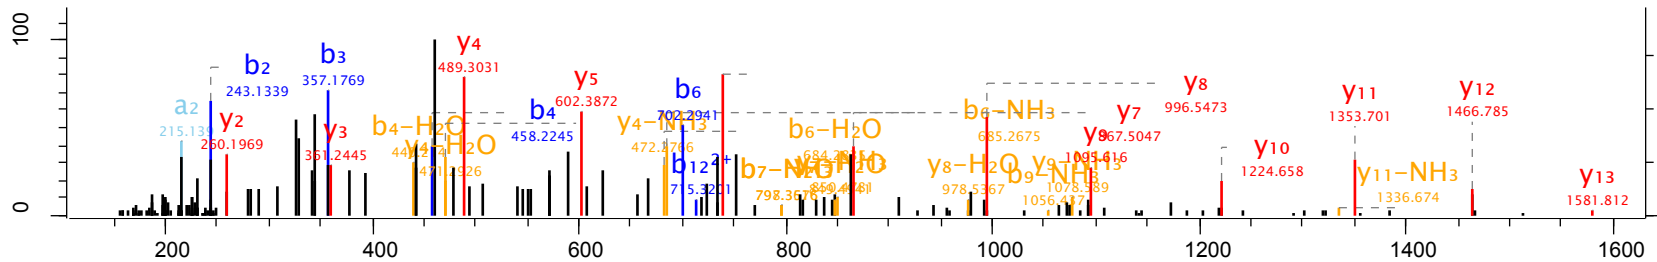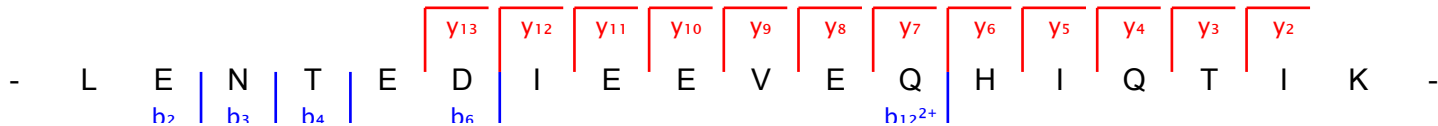

Raw file

Scan

Method

Score

m/z

Gene names

20140925\_fract4\_dyn\_5ul\_B4\_01\_439

29369

TOF; CID

77.66

572.32

BOK

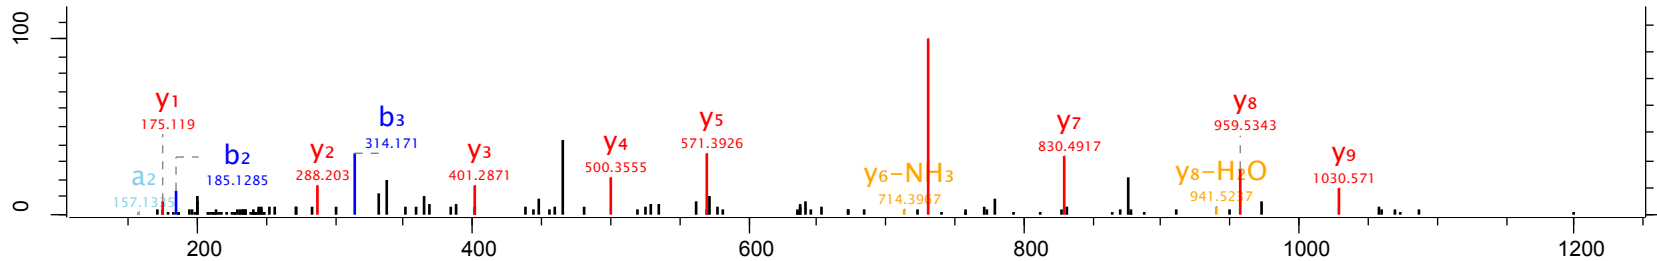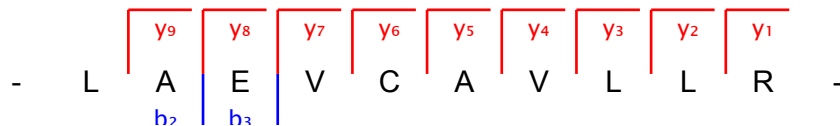

Raw file

20140925\_fract4\_dyn\_5ul\_B4\_01\_439

Scan

31196

Method

TOF; CID

Score

39.48

m/z

668.32

Gene names

PERP

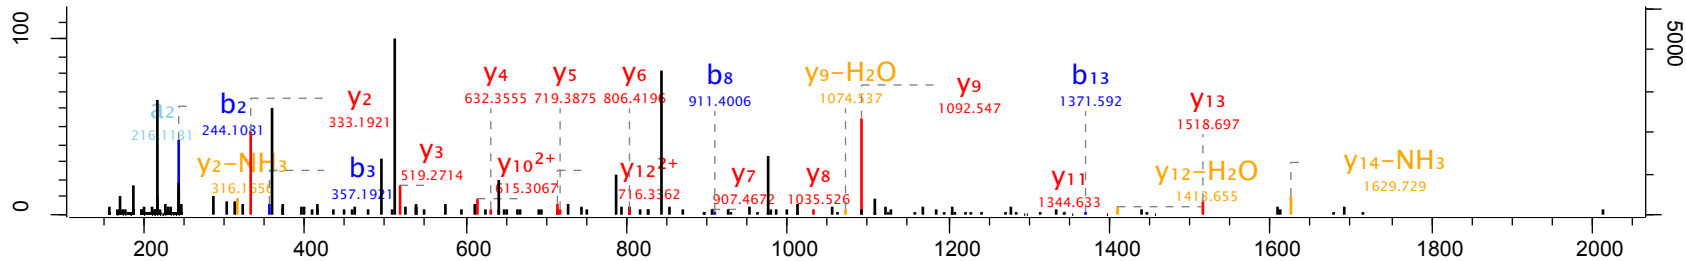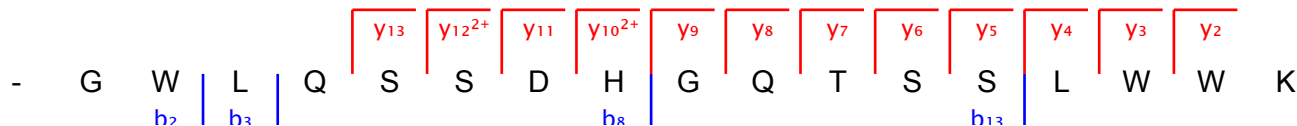

Raw file

20140925\_fract4\_dyn\_5ul\_B4\_01\_439

Scan

31561

Method

TOF; CID

Score

101.56

m/z

717.43

Gene names

EMC9

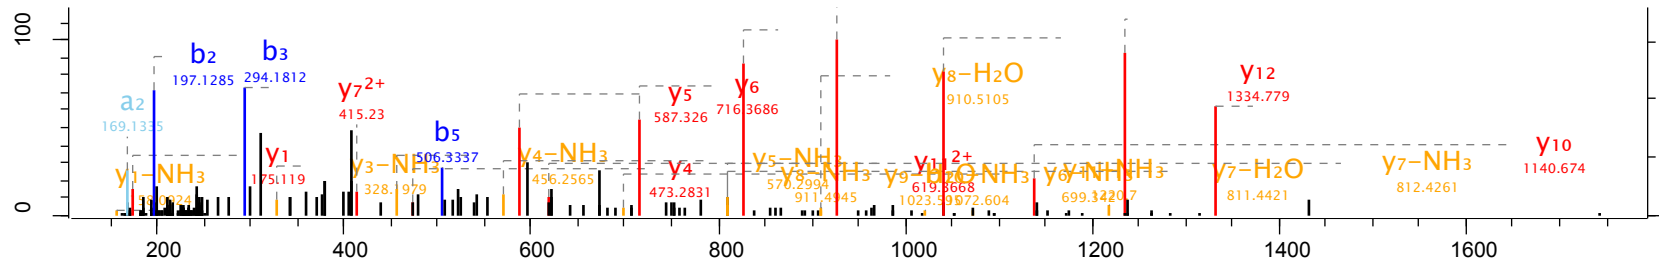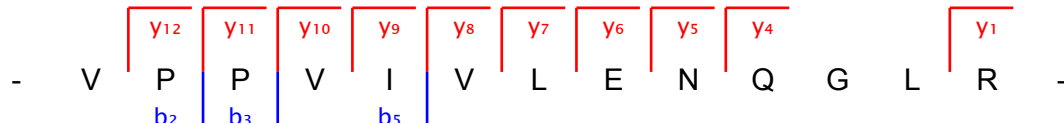



| Raw file                          | Scan  | Method   | Score  | m/z    | Gene names |
|-----------------------------------|-------|----------|--------|--------|------------|
| 20140925_fract4_dyn_5ul_B4_01_439 | 32642 | TOF; CID | 244.37 | 854.42 | SSR3       |

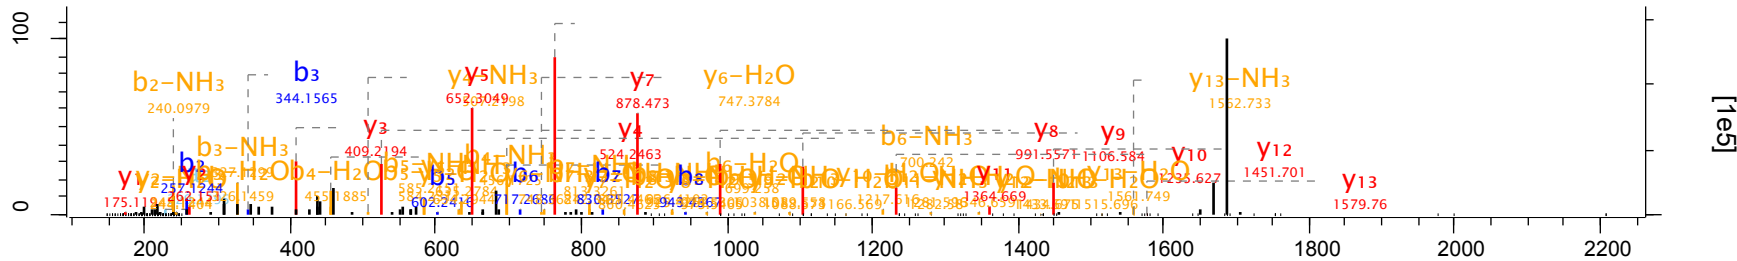

- Q y13 Q y12 S y11 E y10 E y9 D y8 L y7 L y6 L y5 Q y4 D y3 F y2 S y1 R -

b2 b3 b4 b5 b6 b7 b8

Raw file

20140925\_fract4\_dyn\_5ul\_B4\_01\_439

Scan

35372

Method

TOF; CID

Score

61.26

m/z

833.45

Gene names

CES3

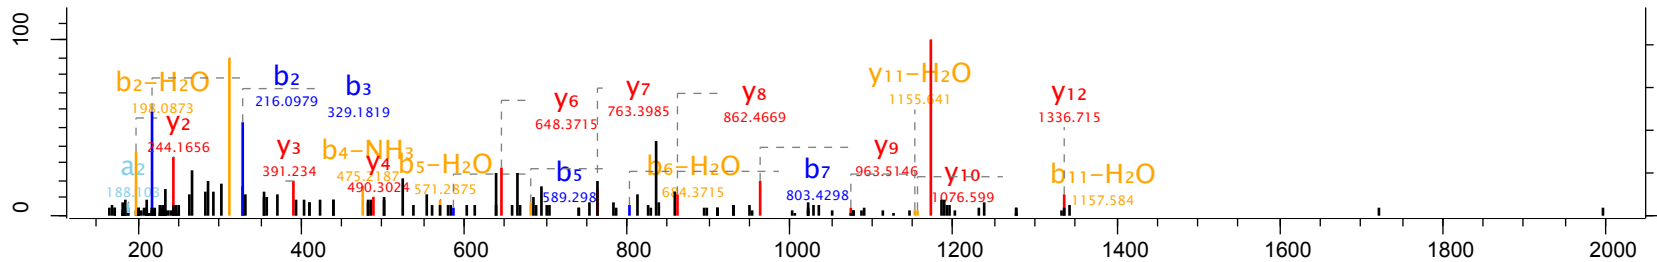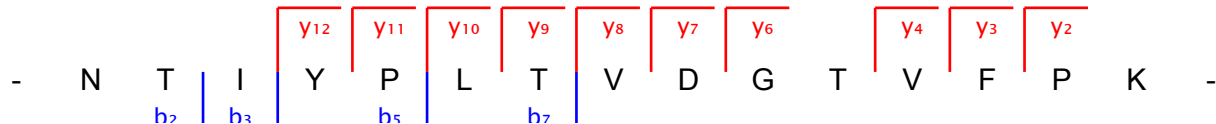

Raw file

20140925\_fract4\_dyn\_5ul\_B4\_01\_439

Scan

35606

Method

TOF; CID

Score

104.17

m/z

744.37

Gene names

VCPKMT

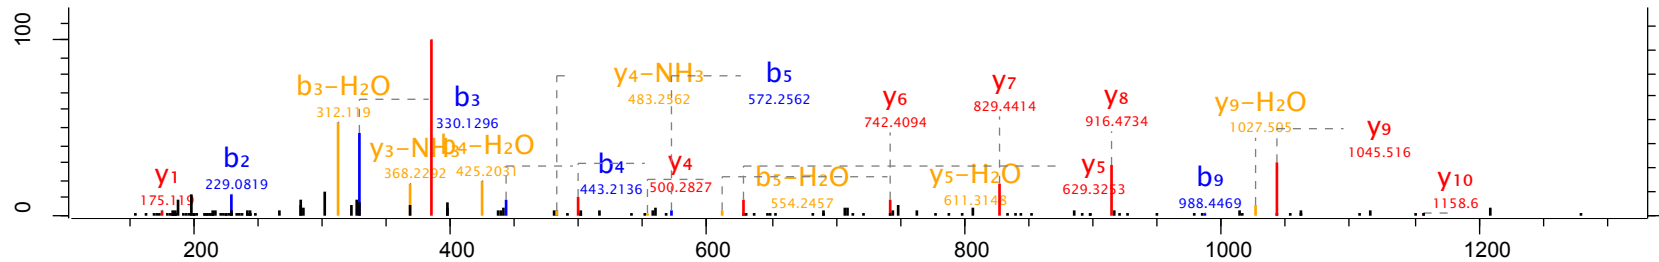

ac

- A D T L E S S L E D P L R -

          |  |  |  |  |  |  |  |  |  |  |  |

          b<sub>2</sub>  b<sub>3</sub>  b<sub>4</sub>  b<sub>5</sub>  b<sub>9</sub>

          y<sub>10</sub>  y<sub>9</sub>  y<sub>8</sub>  y<sub>7</sub>  y<sub>6</sub>  y<sub>5</sub>  y<sub>4</sub>  y<sub>3</sub>  y<sub>1</sub>

Raw file

20140925\_fract4\_dyn\_5ul\_B4\_01\_439

Scan

36201

Method

TOF; CID

Score

65.72

m/z

917.44

Gene names

CNBP

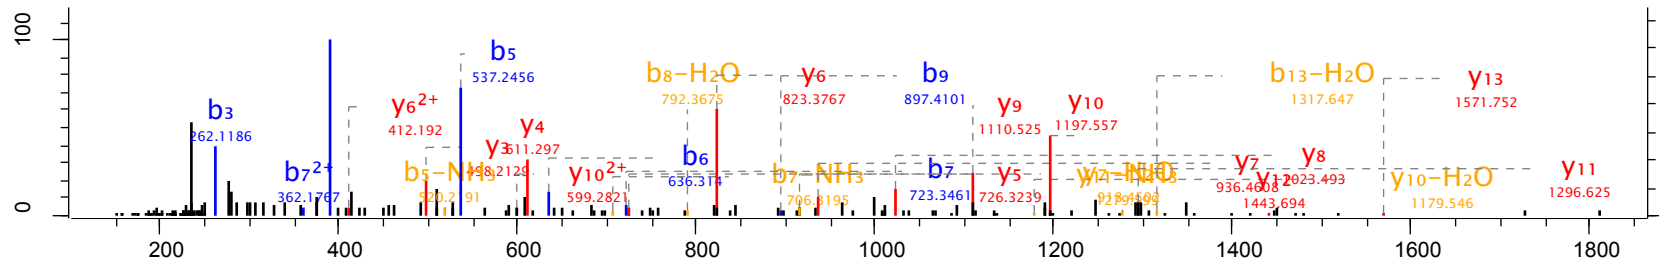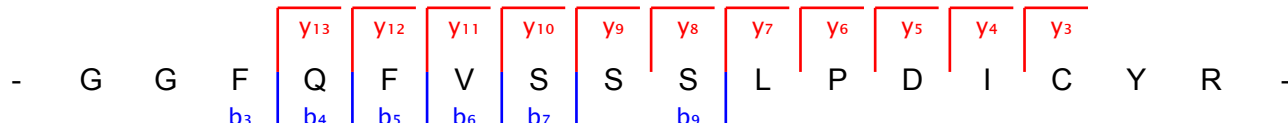

Raw file

20140925\_fract4\_dyn\_5ul\_B4\_01\_439

Scan

37504

Method

TOF; CID

Score

101.32

m/z

797.94

Gene names

CLDN12

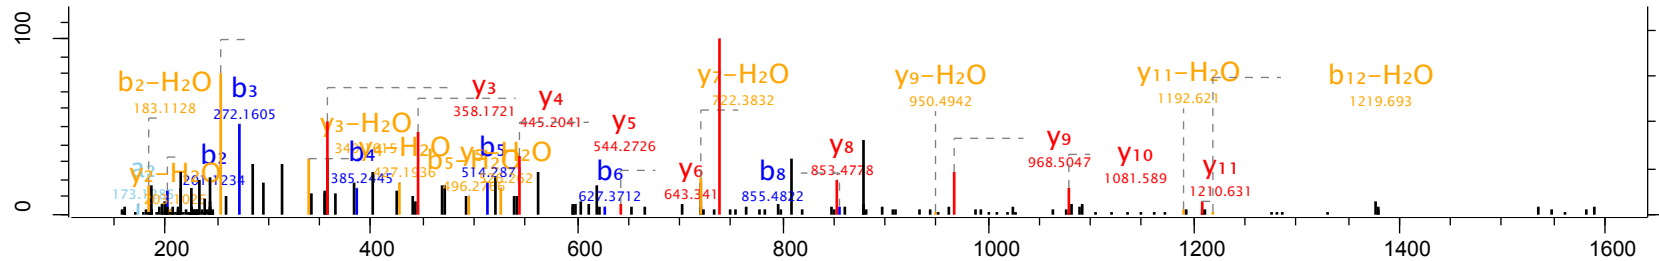

- L S A I E I D I P V V S H T T -  
b<sub>2</sub> b<sub>3</sub> b<sub>4</sub> b<sub>5</sub> b<sub>6</sub> b<sub>8</sub> y<sub>11</sub> y<sub>10</sub> y<sub>9</sub> y<sub>8</sub> y<sub>7</sub> y<sub>6</sub> y<sub>5</sub> y<sub>4</sub> y<sub>3</sub>

Raw file

20140925\_fract4\_dyn\_5ul\_B4\_01\_439

Scan

37880

Method

TOF; CID

Score

43.41

m/z

797.38

Gene names

B9D2

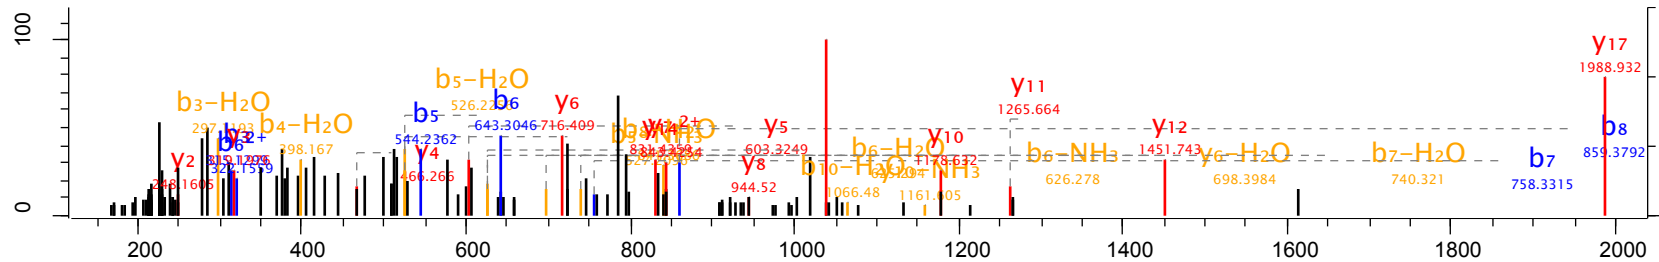

- E G Q | T Q | V | D | T | P Q I G D M A Y W S H P I

h<sub>3</sub> h<sub>5</sub> h<sub>6</sub> h<sub>7</sub> h<sub>8</sub>

y<sub>17</sub> y<sub>14</sub><sup>2+</sup> y<sub>12</sub> y<sub>11</sub> y<sub>10</sub> y<sub>9</sub> y<sub>8</sub>

| Raw file                          | Scan | Method   | Score  | m/z    | Gene names |
|-----------------------------------|------|----------|--------|--------|------------|
| 20140925_fract5_dyn_5ul_B5_01_440 | 7057 | TOF; CID | 183.43 | 489.27 | COX8A      |

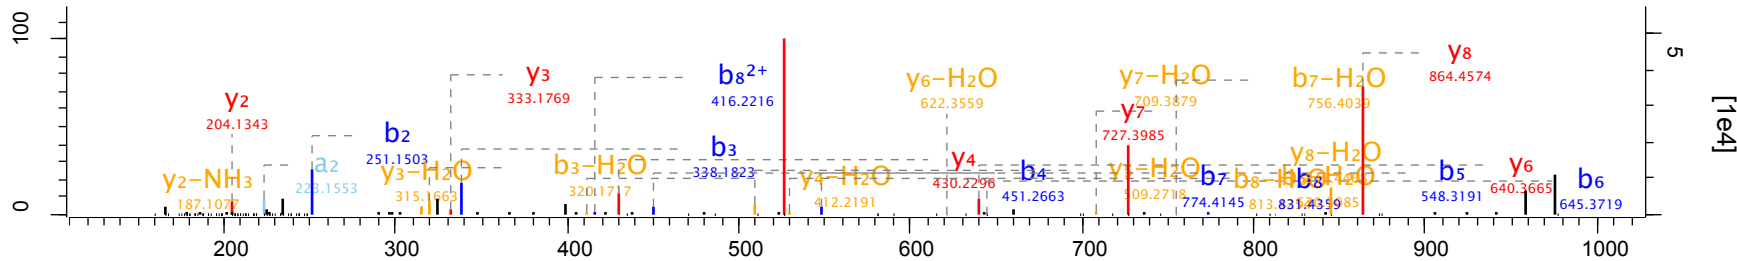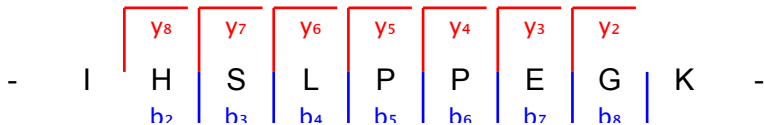

| Raw file                          | Scan  | Method   | Score | m/z    | Gene names |
|-----------------------------------|-------|----------|-------|--------|------------|
| 20140925_fract5_dyn_5ul_B5_01_440 | 10987 | TOF; CID | 94.11 | 408.21 | TMEM187    |

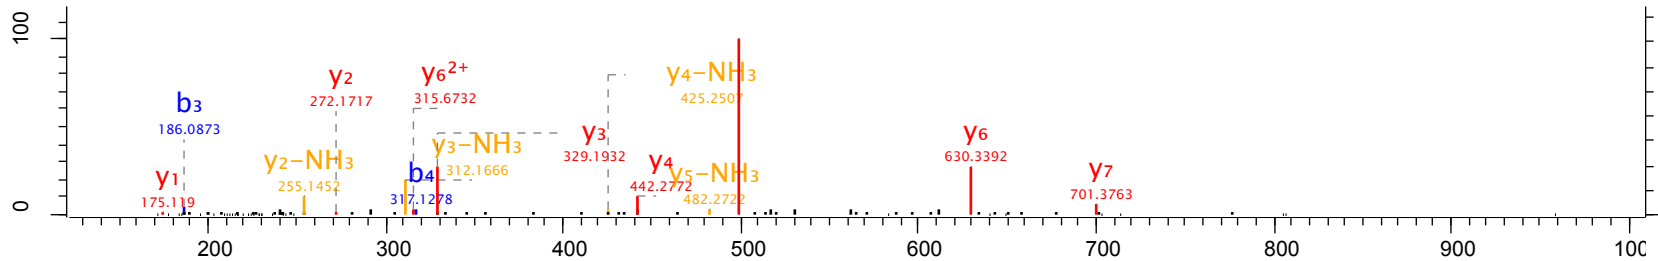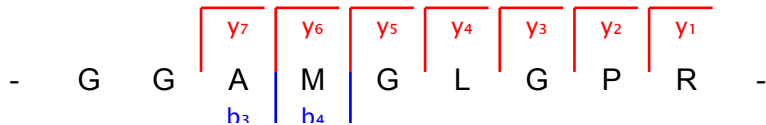



Raw file

20140925\_fract5\_dyn\_5ul\_B5\_01\_440

Scan

12457

Method

TOF; CID

Score

114.72

m/z

640.8

Gene names

C17orf89

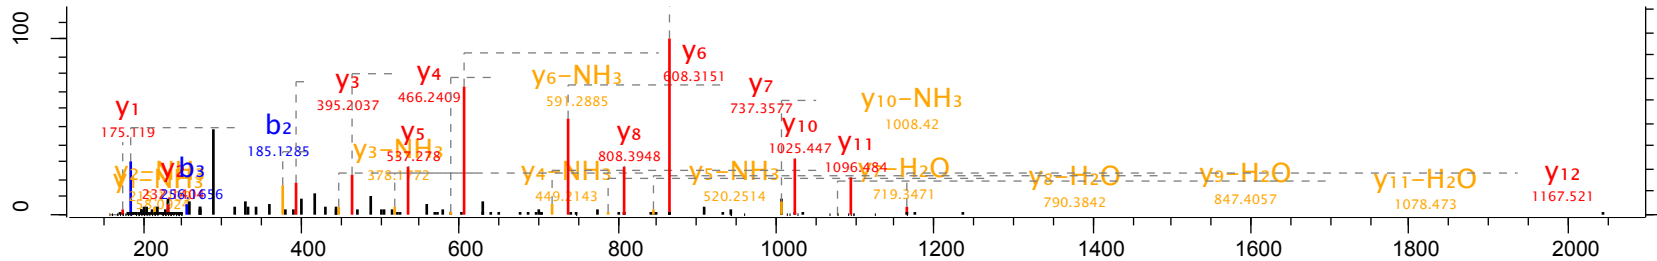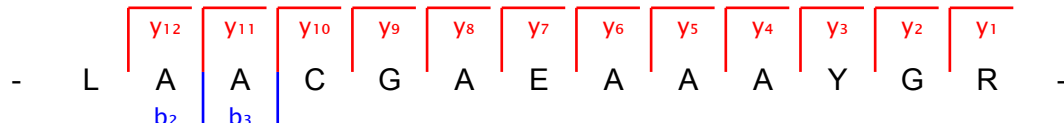

| Raw file                          | Scan  | Method   | Score  | m/z    | Gene names |
|-----------------------------------|-------|----------|--------|--------|------------|
| 20140925_fract5_dyn_5ul_B5_01_440 | 14538 | TOF; CID | 142.43 | 425.86 | CKS1B      |

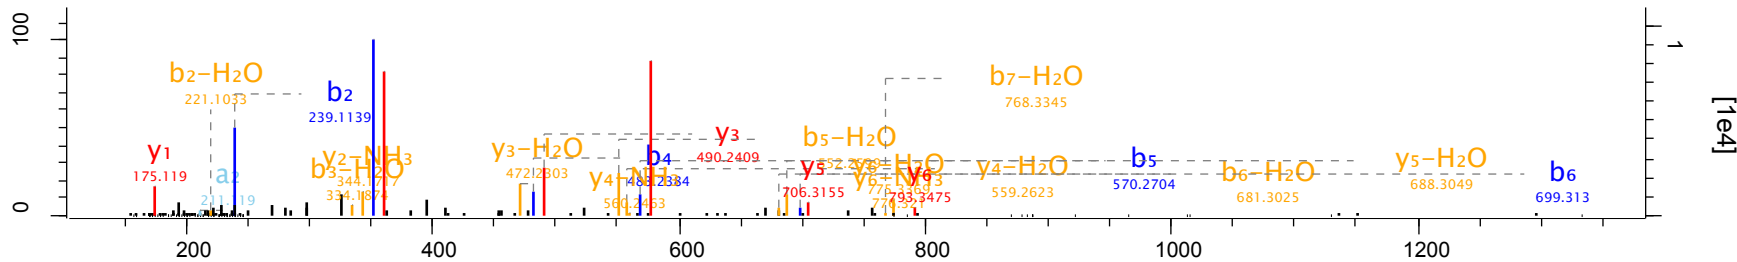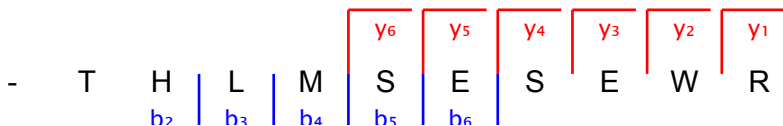

Raw file

20140925\_fract5\_dyn\_5ul\_B5\_01\_440

Scan

16153

Method

TOF; CID

Score

46.51

m/z

932.47

Gene names

JOSD2

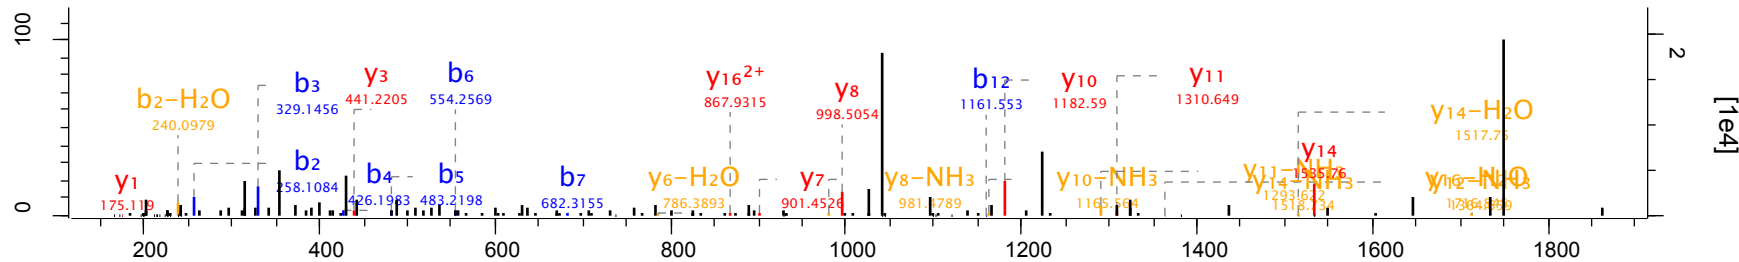

ac

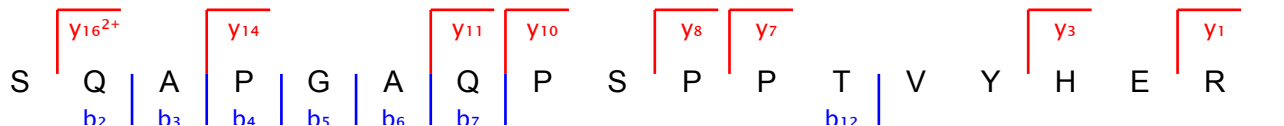

Raw file

20140925\_fract5\_dyn\_5ul\_B5\_01\_440

Scan

16866

Method

TOF; CID

Score

57.41

m/z

834.91

Gene names

FAM174A

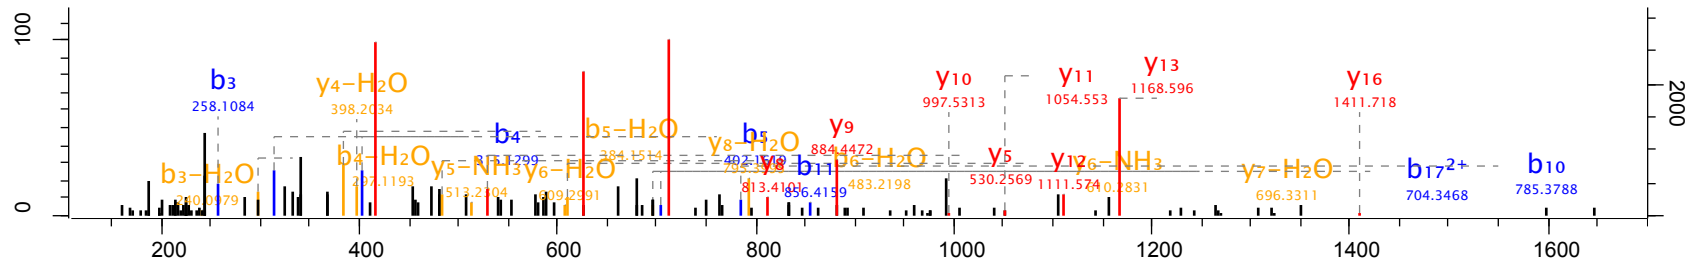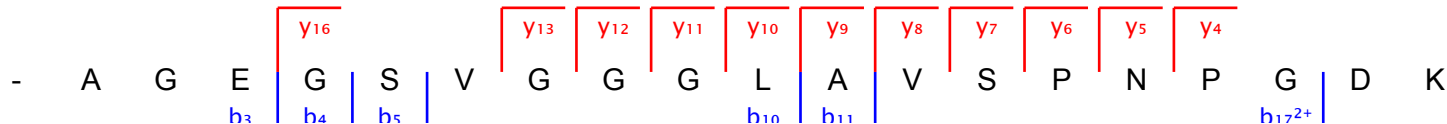

Raw file

Scan

Method

Score

m/z

Gene names

20140925\_fract5\_dyn\_5ul\_B5\_01\_440

18901

TOF; CID

89.51

807.38

CENPO

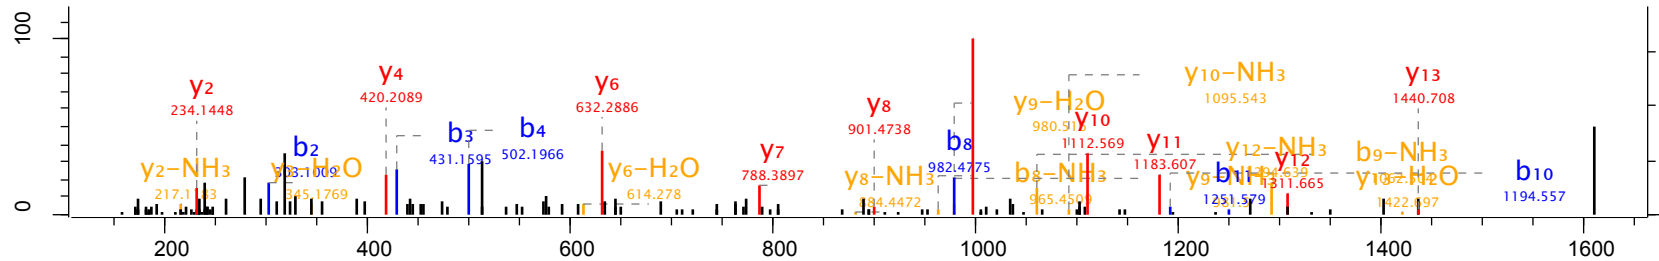

ac

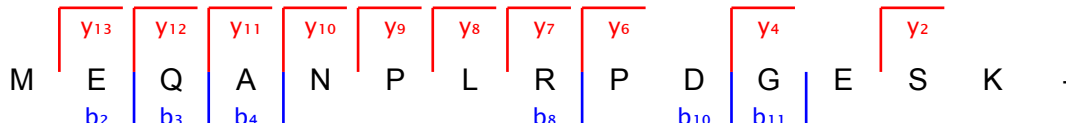

| Raw file                          | Scan  | Method   | Score | m/z    | Gene names |
|-----------------------------------|-------|----------|-------|--------|------------|
| 20140925_fract5_dyn_5ul_B5_01_440 | 20273 | TOF; CID | 86.14 | 512.73 | TMEM258    |

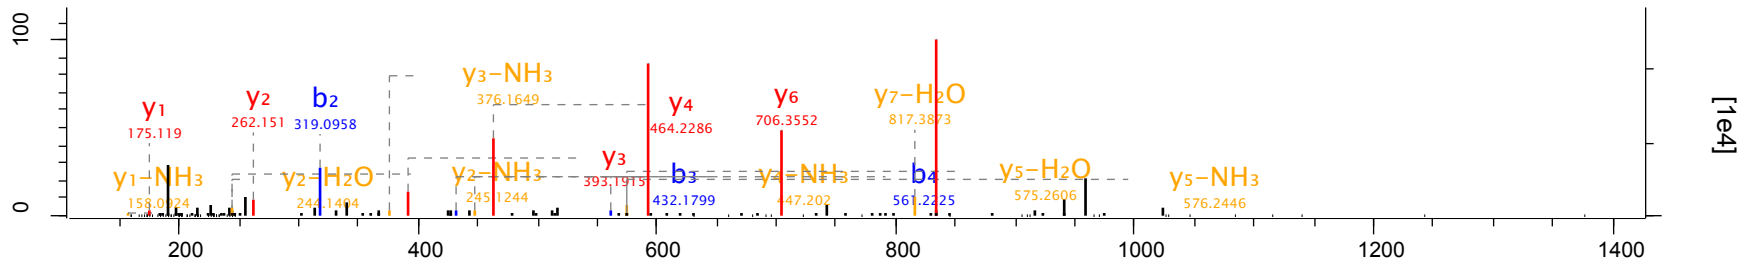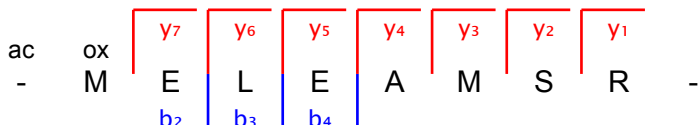

Raw file

20140925\_fract5\_dyn\_5ul\_B5\_01\_440

Scan

20511

Method

TOF; CID

Score

116.78

m/z

579.95

Gene names

CYB561

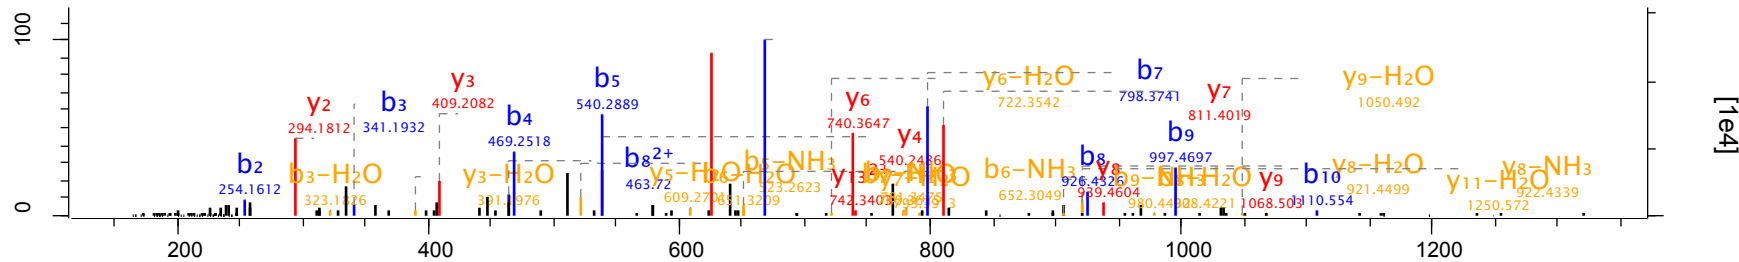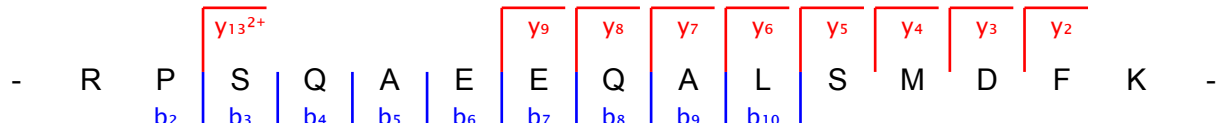

| Raw file                          | Scan  | Method   | Score | m/z    | Gene names |
|-----------------------------------|-------|----------|-------|--------|------------|
| 20140925_fract5_dyn_5ul_B5_01_440 | 23273 | TOF; CID | 46.07 | 463.89 | TERF1      |

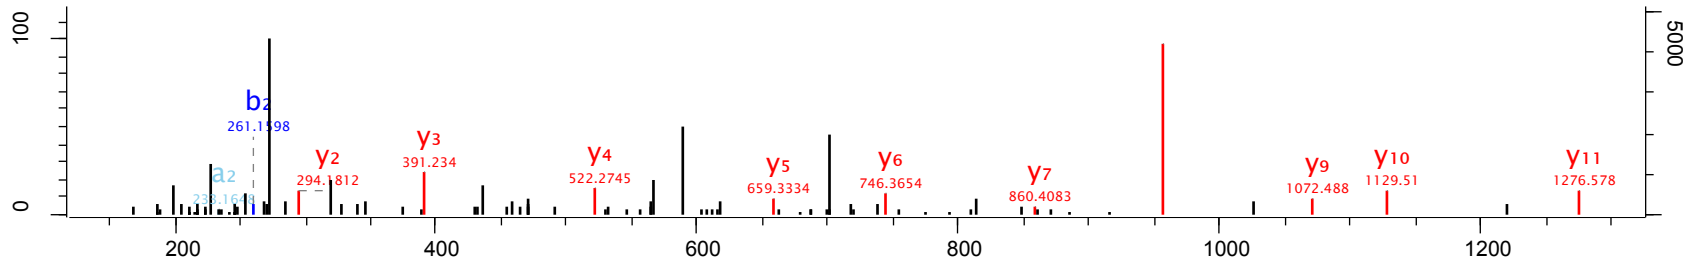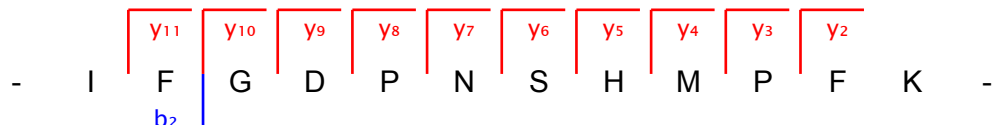



| Raw file                          | Scan  | Method   | Score | m/z    | Gene names |
|-----------------------------------|-------|----------|-------|--------|------------|
| 20140925_fract5_dyn_5ul_B5_01_440 | 23820 | TOF; CID | 77.06 | 722.87 | SAMD12     |

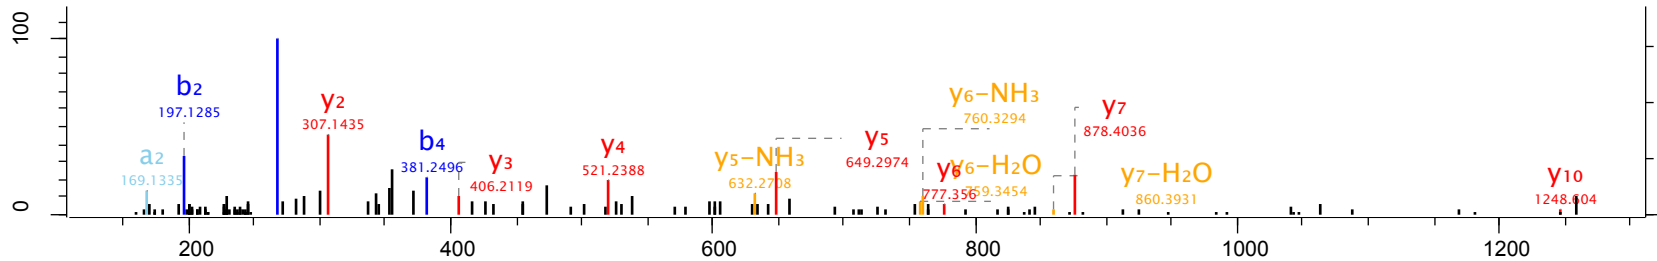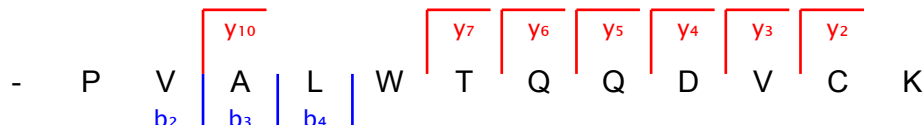

Raw file

20140925\_fract5\_dyn\_5ul\_B5\_01\_440

Scan

25198

Method

TOF; CID

Score

66

m/z

693.36

Gene names

SLC22A3

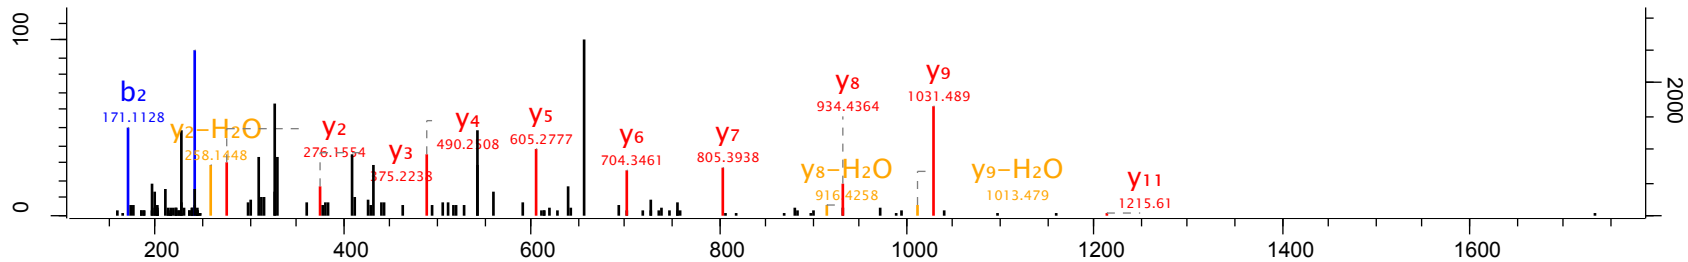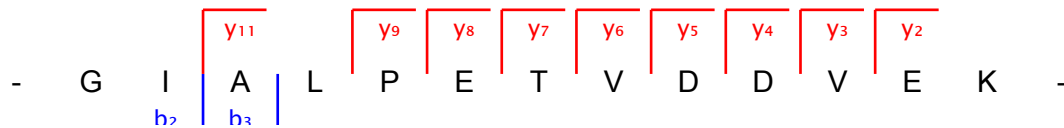

Raw file

20140925\_fract5\_dyn\_5ul\_B5\_01\_440

Scan

25642

Method

TOF; CID

Score

114.96

m/z

943.96

Gene names

MKKS

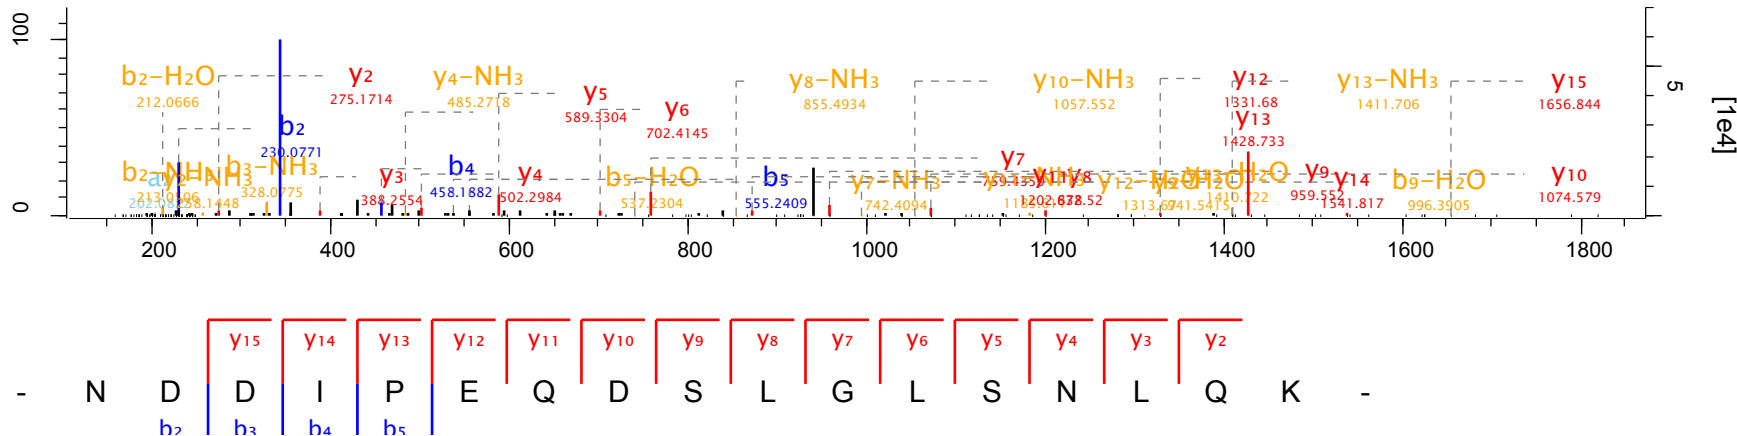

Raw file

20140925\_fract5\_dyn\_5ul\_B5\_01\_440

Scan

29617

Method

TOF; CID

Score

58.89

m/z

687.86

Gene names

FAM89B

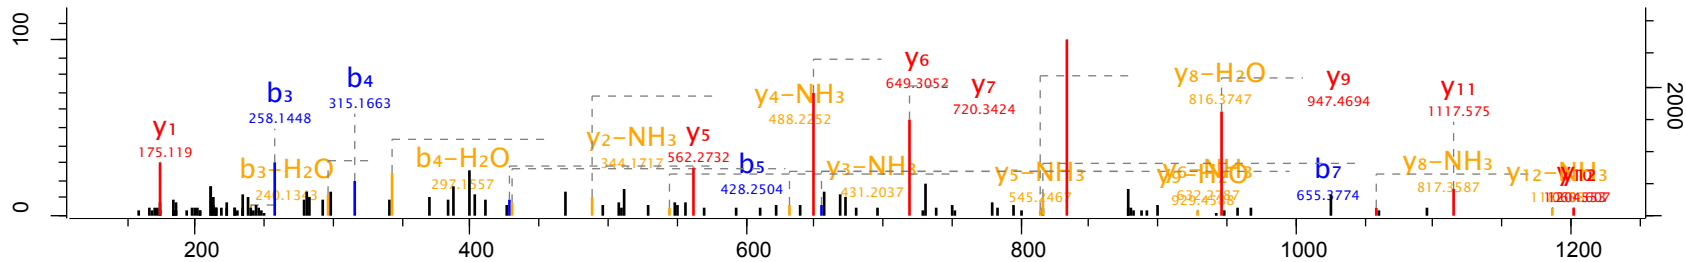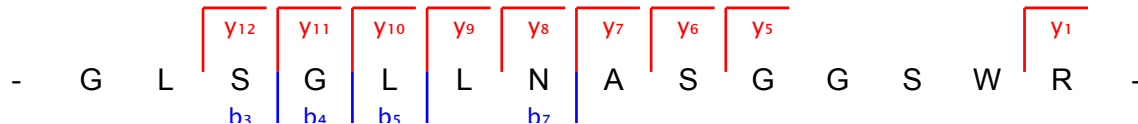

Raw file

20140925\_fract5\_dyn\_5ul\_B5\_01\_440

Scan

29669

Method

TOF; CID

Score

91.59

m/z

735.03

Gene names

UBALD1

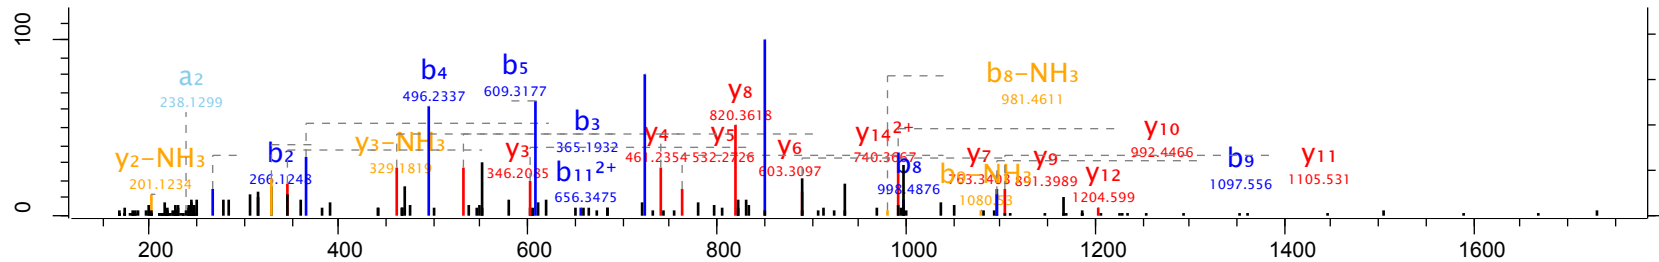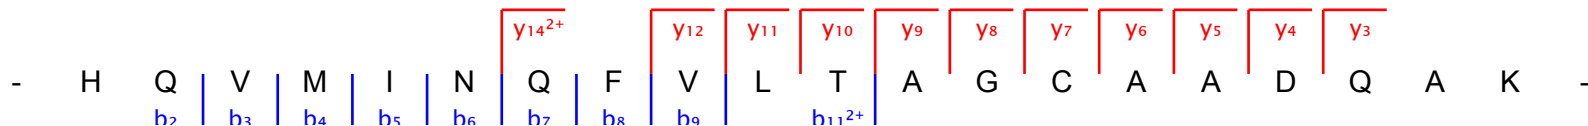

Raw file

20140925\_fract5\_dyn\_5ul\_B5\_01\_440

Scan

30227

Method

TOF; CID

Score

112.17

m/z

626.32

Gene names

OTUB2

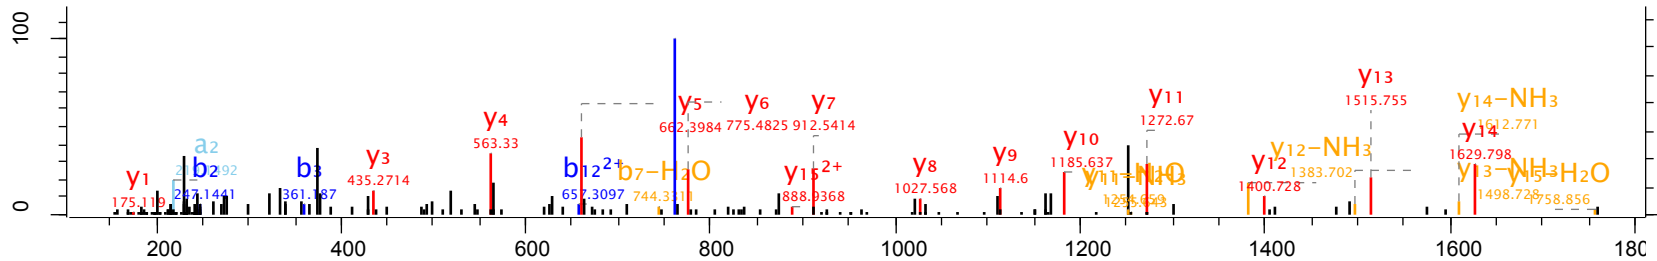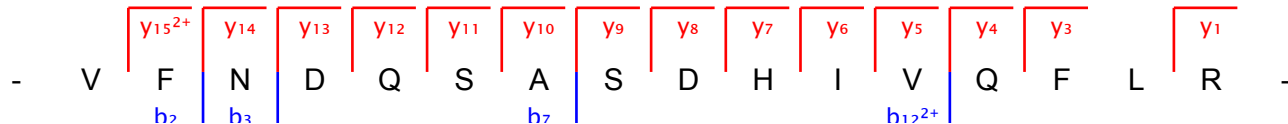

Raw file

20140925\_fract5\_dyn\_5ul\_B5\_01\_440

Scan

31940

Method

TOF; CID

Score

52.18

m/z

725.35

Gene names

PRR3

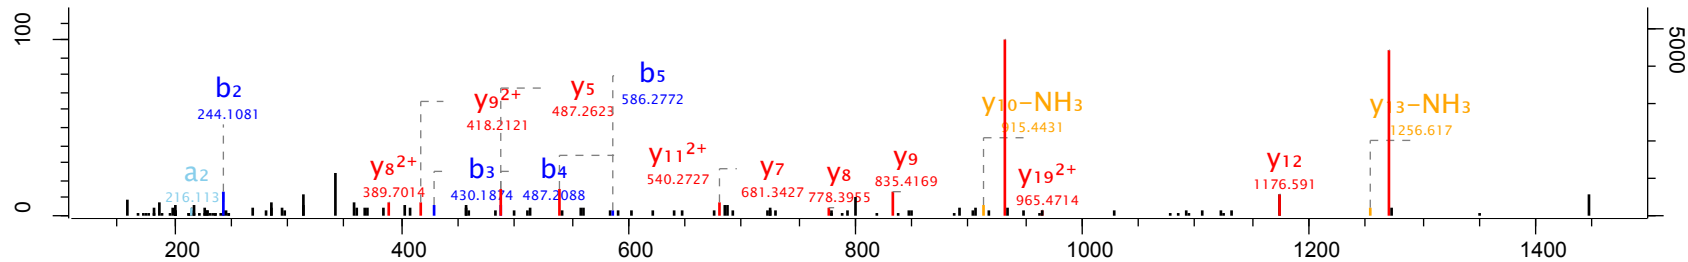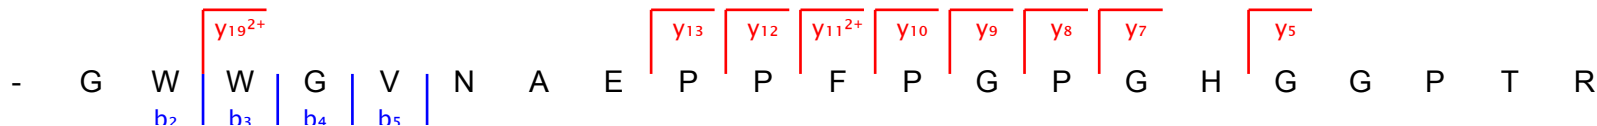

Raw file

20140925\_fract5\_dyn\_5ul\_B5\_01\_440

Scan

32102

Method

TOF; CID

Score

41.21

m/z

1213.6

Gene names

JAG1

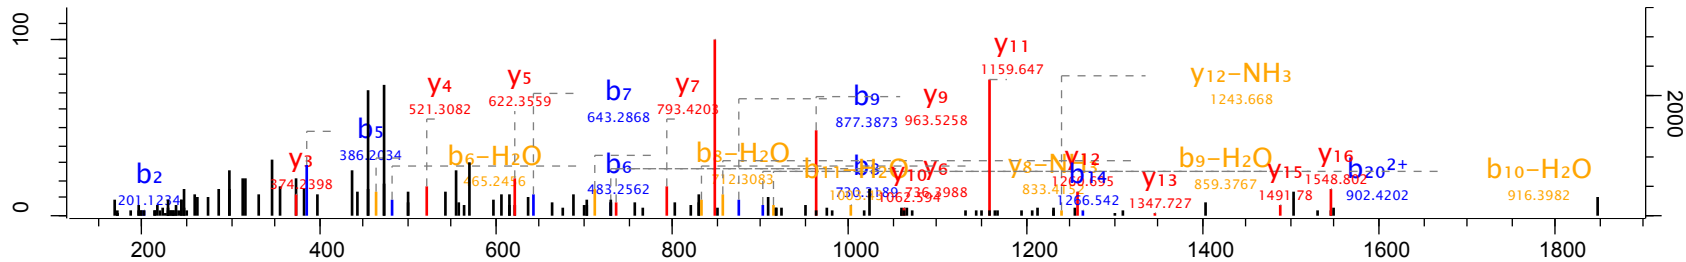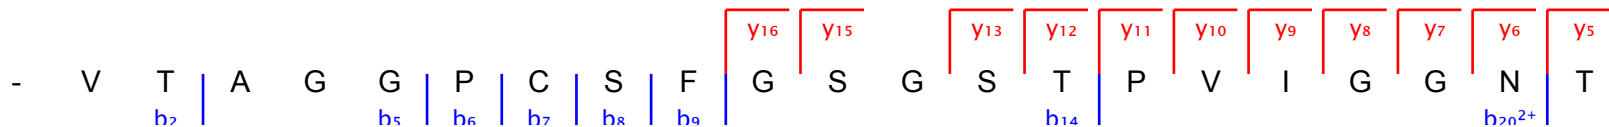



| Raw file                          | Scan  | Method   | Score | m/z    | Gene names |
|-----------------------------------|-------|----------|-------|--------|------------|
| 20140925_fract5_dyn_5ul_B5_01_440 | 34064 | TOF; CID | 117.7 | 576.85 | SPIN4      |

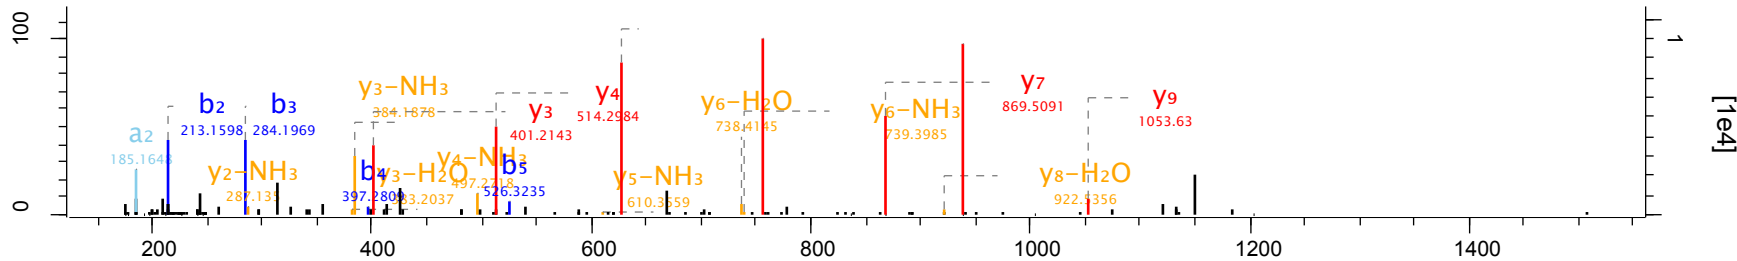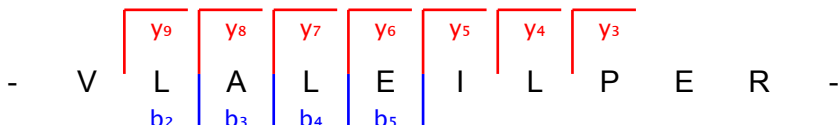

Raw file

20140925\_fract5\_dyn\_5ul\_B5\_01\_440

Scan

35034

Method

TOF; CID

Score

70.41

m/z

650.32

Gene names

RNF141

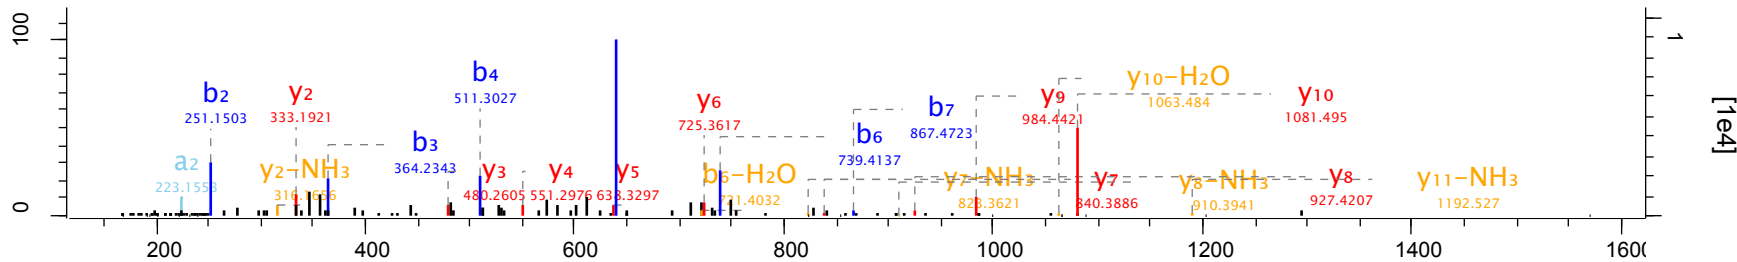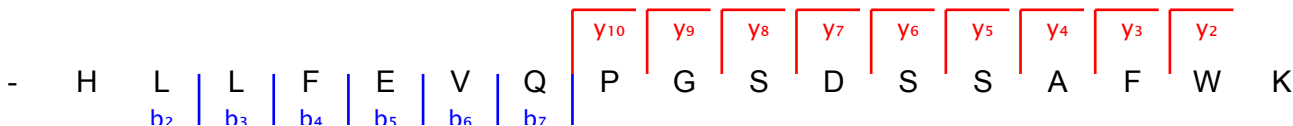

| Raw file                          | Scan  | Method   | Score | m/z    | Gene names |
|-----------------------------------|-------|----------|-------|--------|------------|
| 20140925_fract5_dyn_5ul_B5_01_440 | 35562 | TOF; CID | 69.98 | 651.32 | BCL2       |

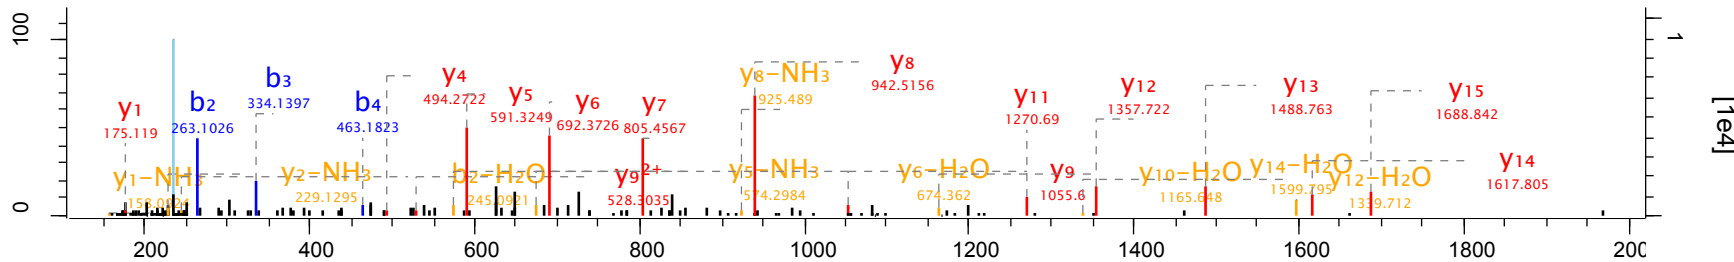

Protein sequence: - D F A E M S S Q L H L T P F T A R -

Fragmentation sites (b-ions in blue, y-ions in red):

- b2 (blue) between F and A
- b3 (blue) between A and E
- b4 (blue) between E and M
- y1 (red) between R and -
- y4 (red) between F and T
- y5 (red) between P and F
- y6 (red) between T and P
- y7 (red) between L and H
- y8 (red) between H and L
- y9 (red) between L and Q
- y11 (red) between S and S
- y12 (red) between S and M
- y13 (red) between M and E
- y14 (red) between E and A
- y15 (red) between A and F

Raw file

Scan

Method

Score

m/z

Gene names

20140925\_fract6\_dyn\_5ul\_B6\_01\_441

3737

TOF; CID

53.45

675.29

HMGN1

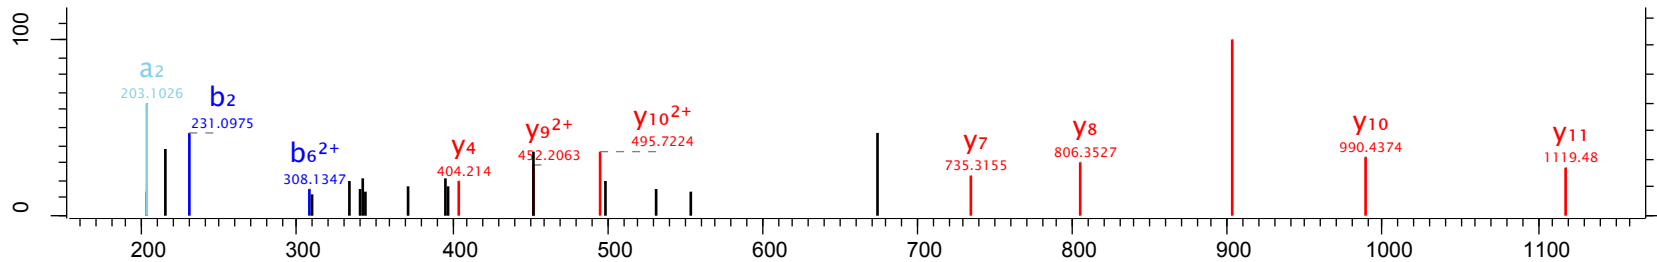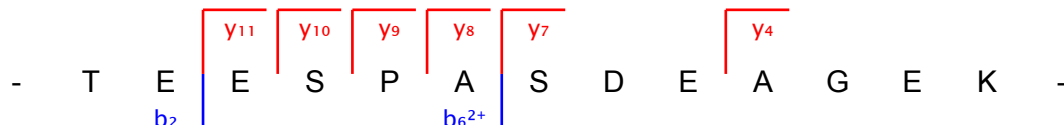

| Raw file                          | Scan | Method   | Score  | m/z   | Gene names |
|-----------------------------------|------|----------|--------|-------|------------|
| 20140925_fract6_dyn_5ul_B6_01_441 | 4453 | TOF; CID | 157.91 | 594.3 | NR1H3      |

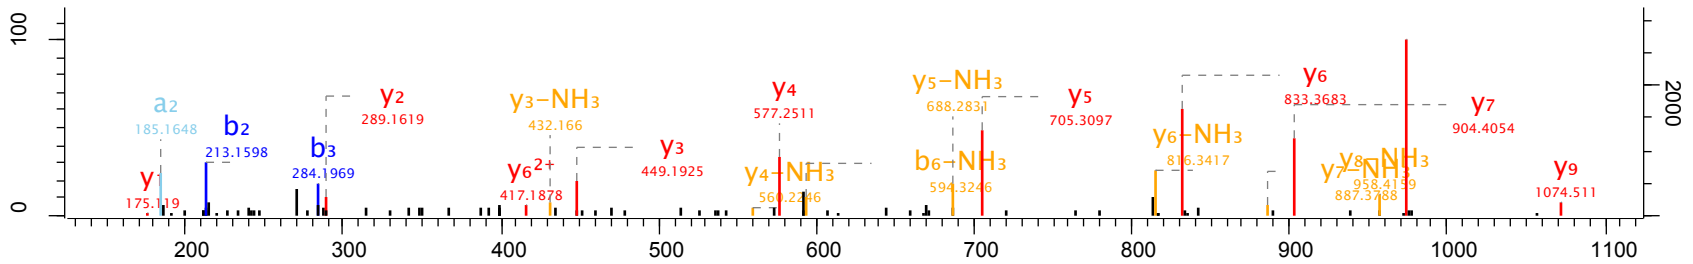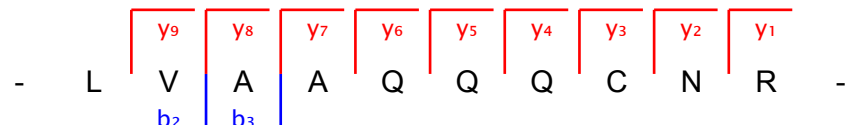

| Raw file                          | Scan | Method   | Score | m/z    | Gene names |
|-----------------------------------|------|----------|-------|--------|------------|
| 20140925_fract6_dyn_5ul_B6_01_441 | 7012 | TOF; CID | 97.28 | 527.29 | ZNF229     |

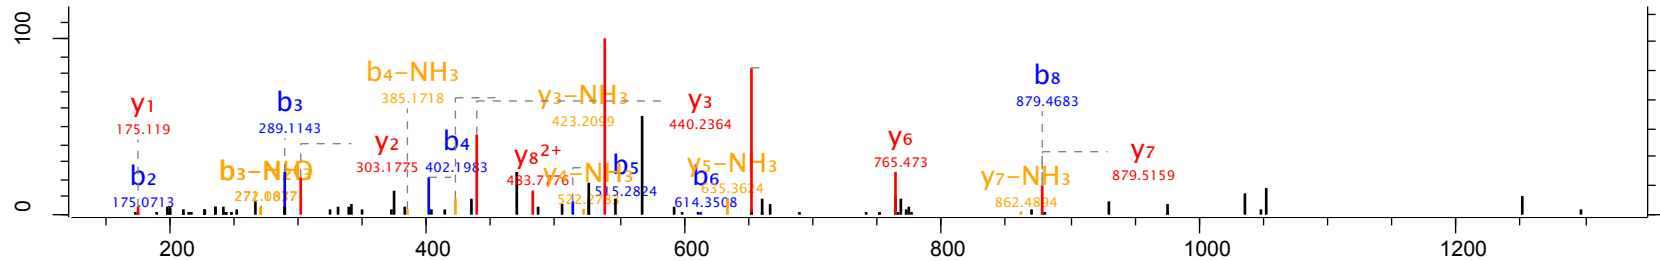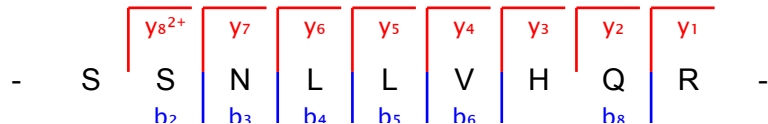

Raw file

20140925\_fract6\_dyn\_5ul\_B6\_01\_441

Scan

10157

Method

TOF; CID

Score

118.76

m/z

617.32

Gene names

HDGFRP2

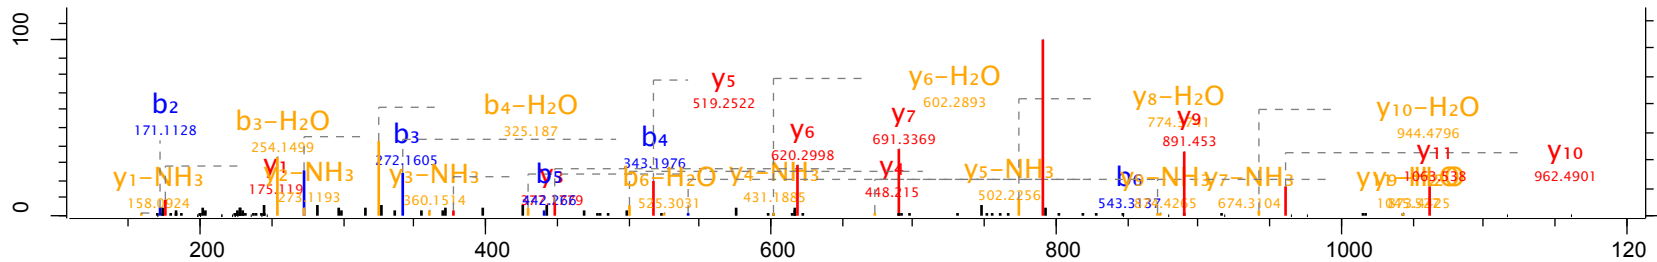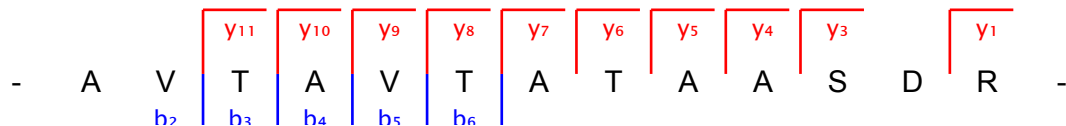

Raw file

20140925\_fract6\_dyn\_5ul\_B6\_01\_441

Scan

13025

Method

TOF; CID

Score

95.2

m/z

804.39

Gene names

GPRC5C

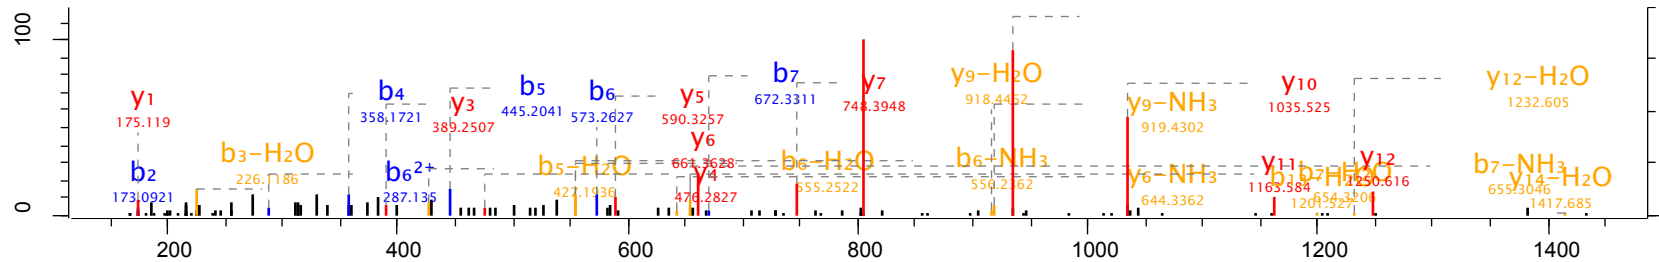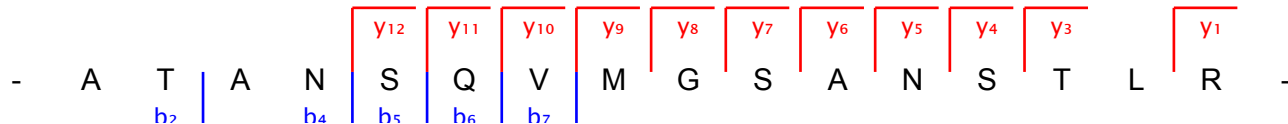



Raw file

20140925\_fract6\_dyn\_5ul\_B6\_01\_441

Scan

14027

Method

TOF; CID

Score

137.21

m/z

835.4

Gene names

SNAP25

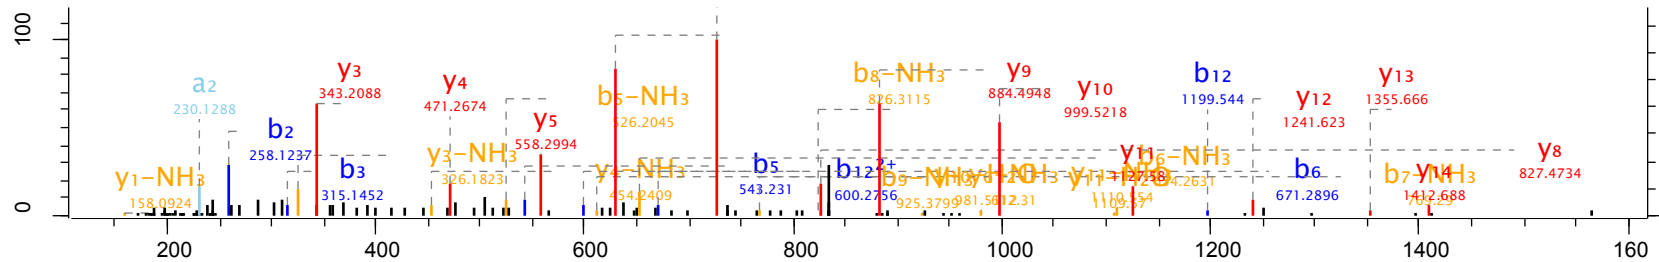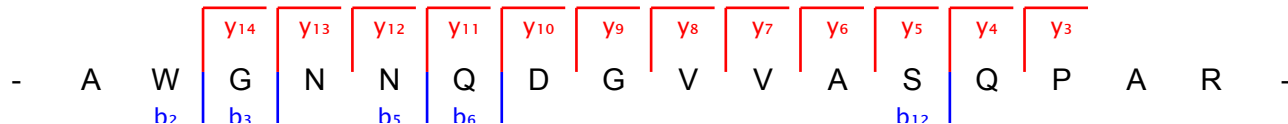

Raw file

20140925\_fract6\_dyn\_5ul\_B6\_01\_441

Scan

16625

Method

TOF; CID

Score

118.19

m/z

843.38

Gene names

ELOVL6

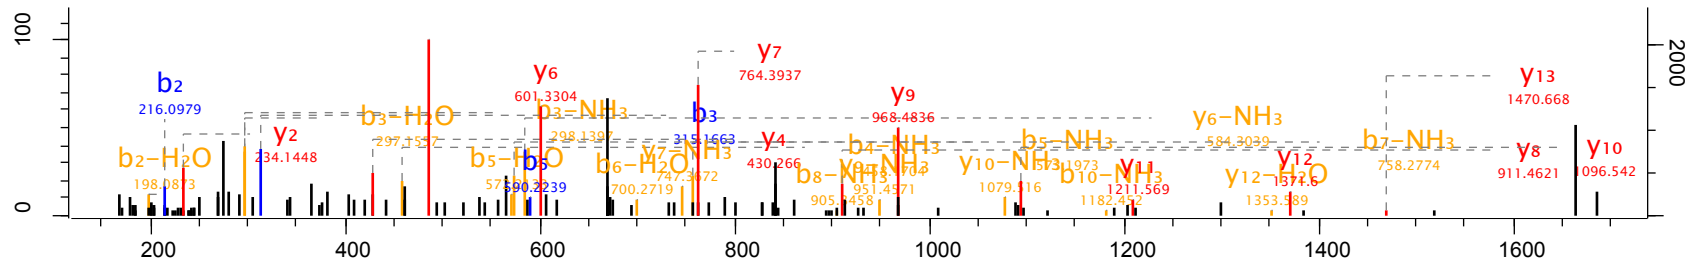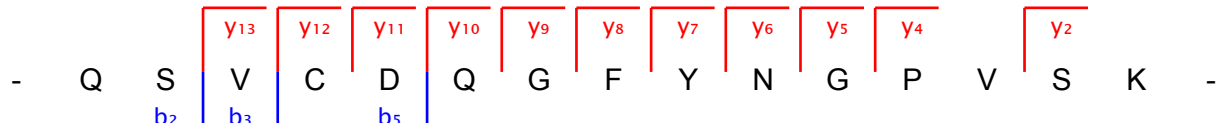

| Raw file                          | Scan  | Method   | Score | m/z    | Gene names |
|-----------------------------------|-------|----------|-------|--------|------------|
| 20140925_fract6_dyn_5ul_B6_01_441 | 16864 | TOF; CID | 104.7 | 560.27 | TRIM38     |

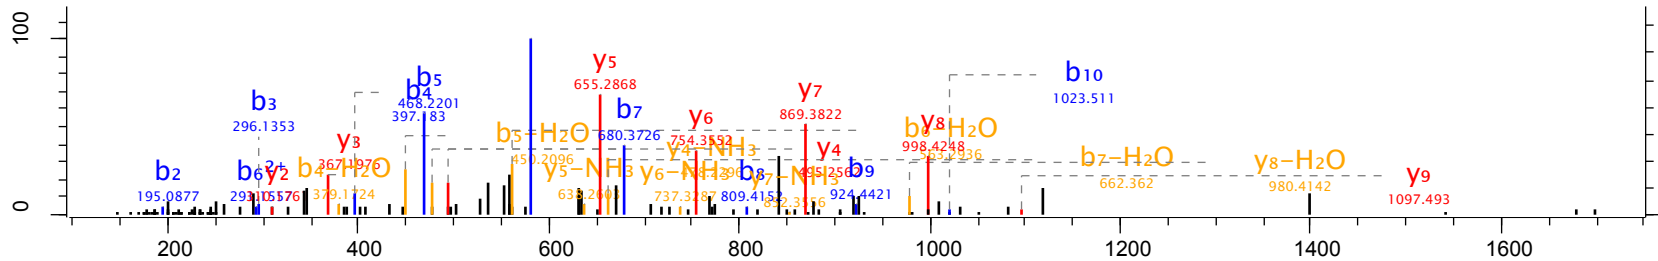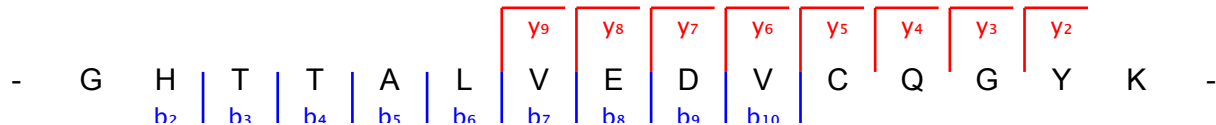

Raw file

20140925\_fract6\_dyn\_5ul\_B6\_01\_441

Scan

17095

Method

TOF; CID

Score

69.92

m/z

498.24

Gene names

FBXO46

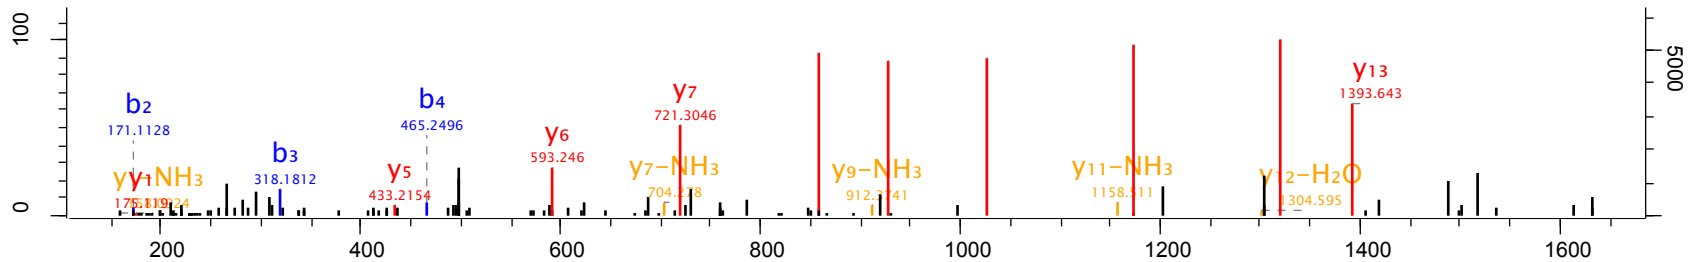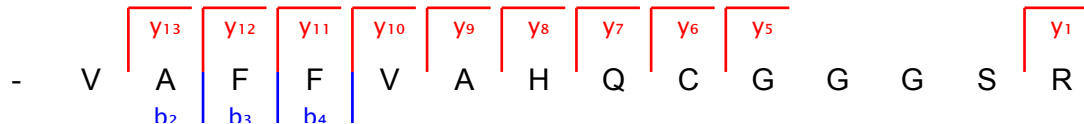

| Raw file                          | Scan  | Method   | Score  | m/z    | Gene names |
|-----------------------------------|-------|----------|--------|--------|------------|
| 20140925_fract6_dyn_5ul_B6_01_441 | 17611 | TOF; CID | 139.39 | 578.82 | FAM109A    |

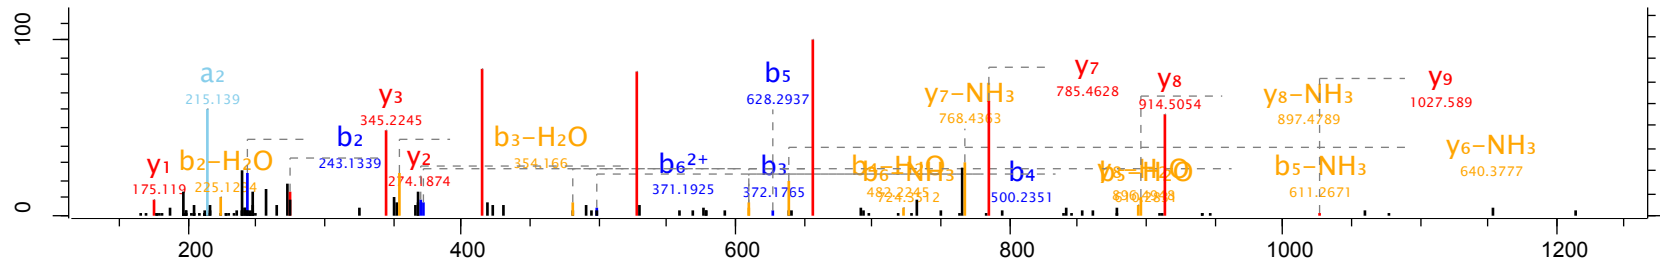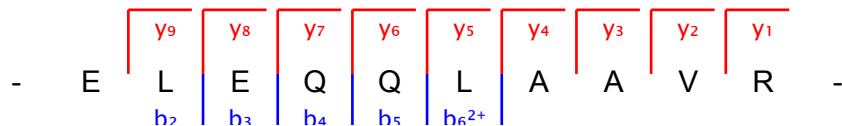

Raw file

20140925\_fract6\_dyn\_5ul\_B6\_01\_441

Scan

20019

Method

TOF; CID

Score

65.84

m/z

718.32

Gene names

ATG10

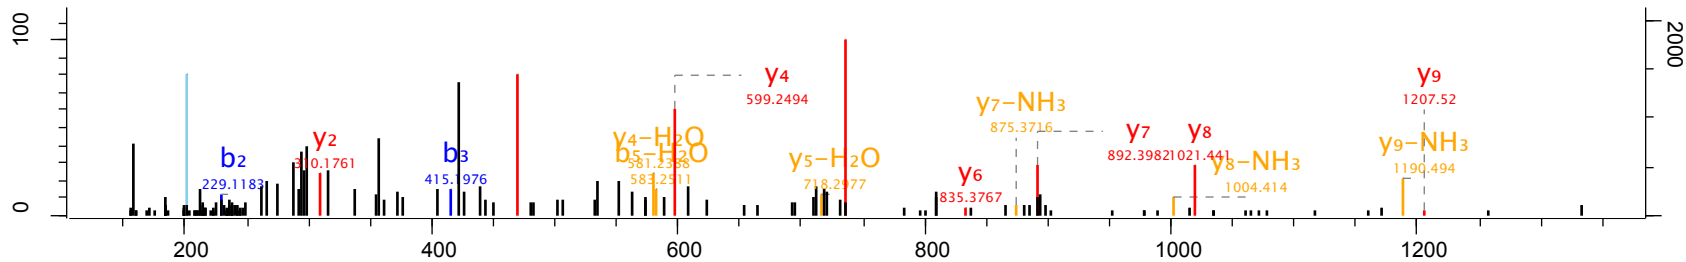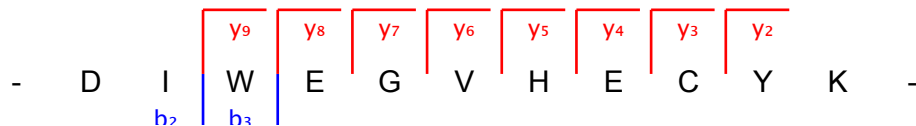

| Raw file                          | Scan  | Method   | Score | m/z     | Gene names |
|-----------------------------------|-------|----------|-------|---------|------------|
| 20140925_fract6_dyn_5ul_B6_01_441 | 20736 | TOF; CID | 30.92 | 1137.52 | MDM2       |

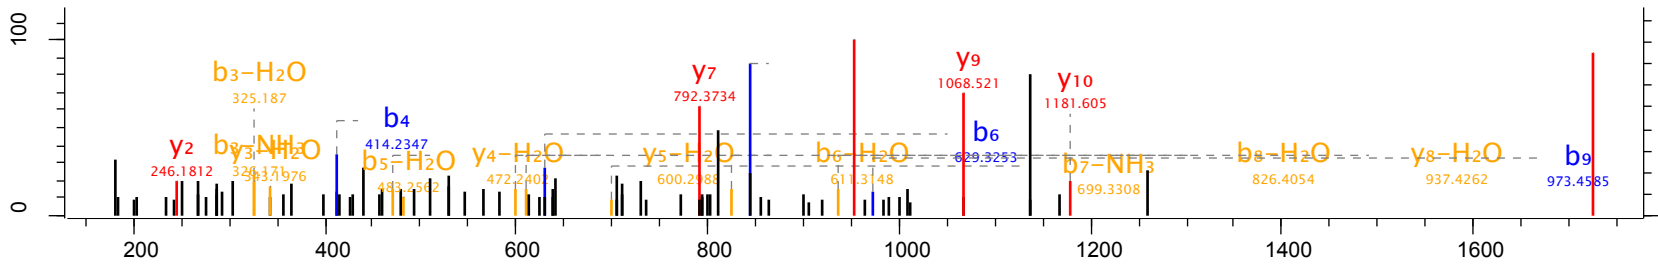

- I T Q A | S Q | S Q | E | S E D Y S Q P S T S S S

h<sub>4</sub> | h<sub>6</sub> | h<sub>8</sub> | h<sub>9</sub> | y<sub>16</sub>

Raw file

20140925\_fract6\_dyn\_5ul\_B6\_01\_441

Scan

21185

Method

TOF; CID

Score

121.95

m/z

591.31

Gene names

BTBD7

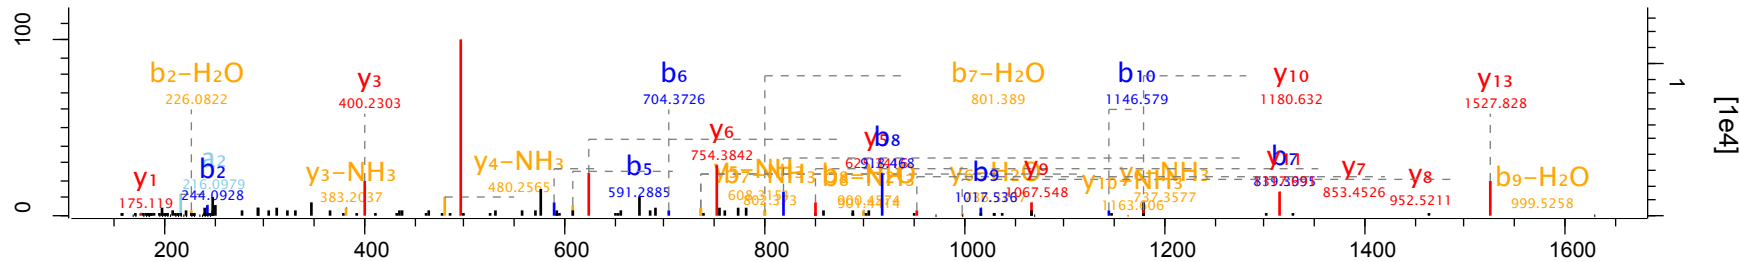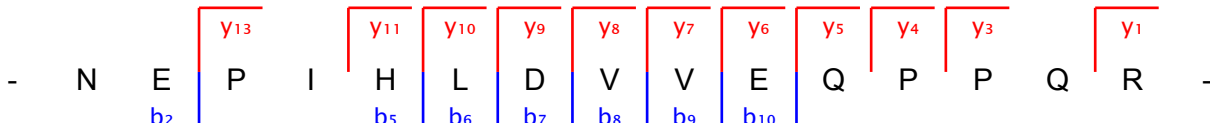



| Raw file                          | Scan  | Method   | Score | m/z    | Gene names |
|-----------------------------------|-------|----------|-------|--------|------------|
| 20140925_fract6_dyn_5ul_B6_01_441 | 22628 | TOF; CID | 86.8  | 461.23 | ZKSCAN5    |

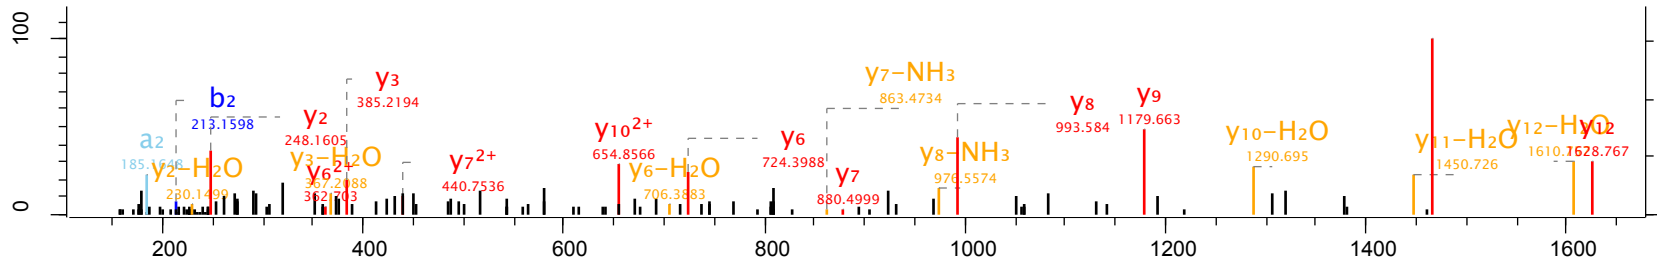

- V L C C E W L R P E L H T K -  
 b<sub>2</sub>

y<sub>12</sub> y<sub>11</sub> y<sub>10</sub><sup>2+</sup> y<sub>9</sub> y<sub>8</sub> y<sub>7</sub> y<sub>6</sub> y<sub>3</sub> y<sub>2</sub>

Raw file

20140925\_fract6\_dyn\_5ul\_B6\_01\_441

Scan

24882

Method

TOF; CID

Score

64.12

m/z

586.84

Gene names

KATNAL2

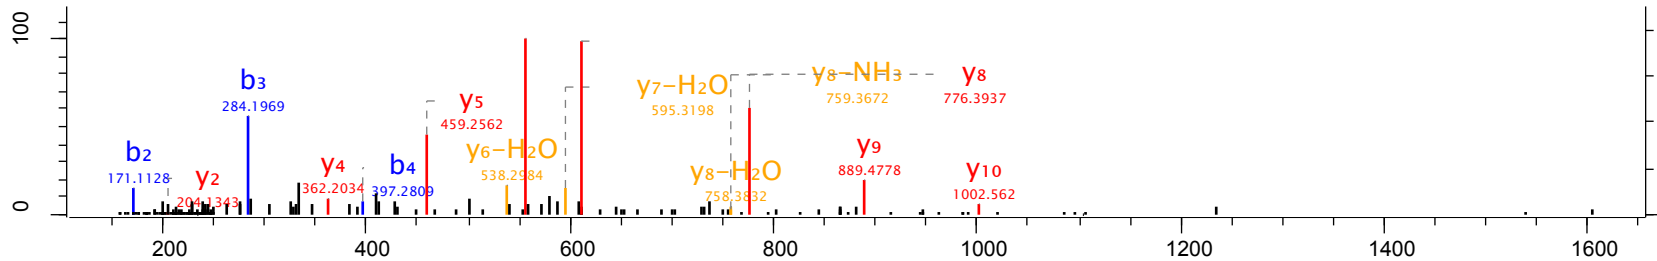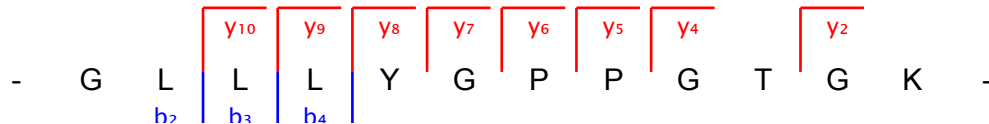

| Raw file                          | Scan  | Method   | Score  | m/z   | Gene names |
|-----------------------------------|-------|----------|--------|-------|------------|
| 20140925_fract6_dyn_5ul_B6_01_441 | 26241 | TOF; CID | 109.48 | 541.8 | PRELID1    |

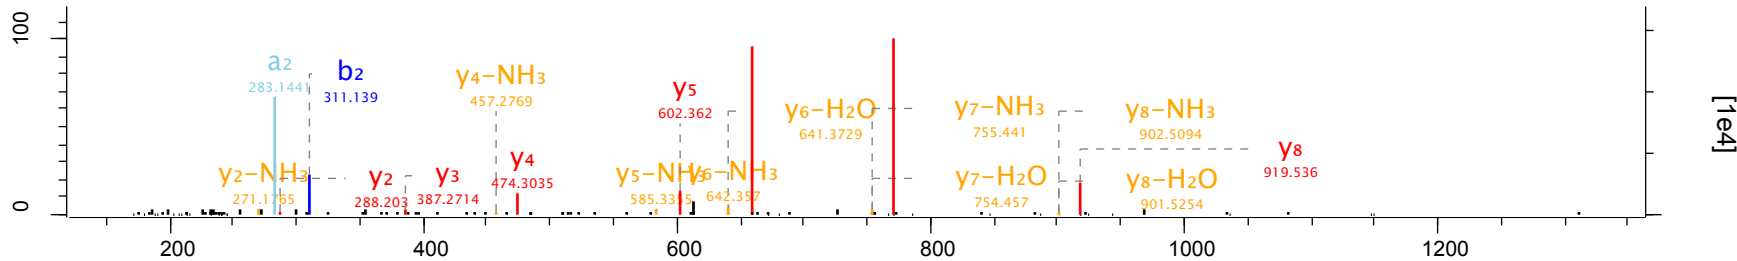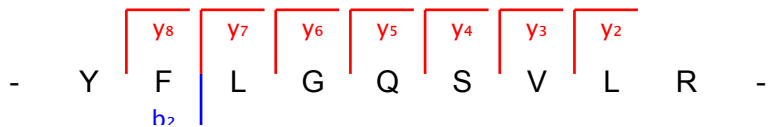

Raw file

20140925\_fract6\_dyn\_5ul\_B6\_01\_441

Scan

26604

Method

TOF; CID

Score

73.83

m/z

556.29

Gene names

FAM210B

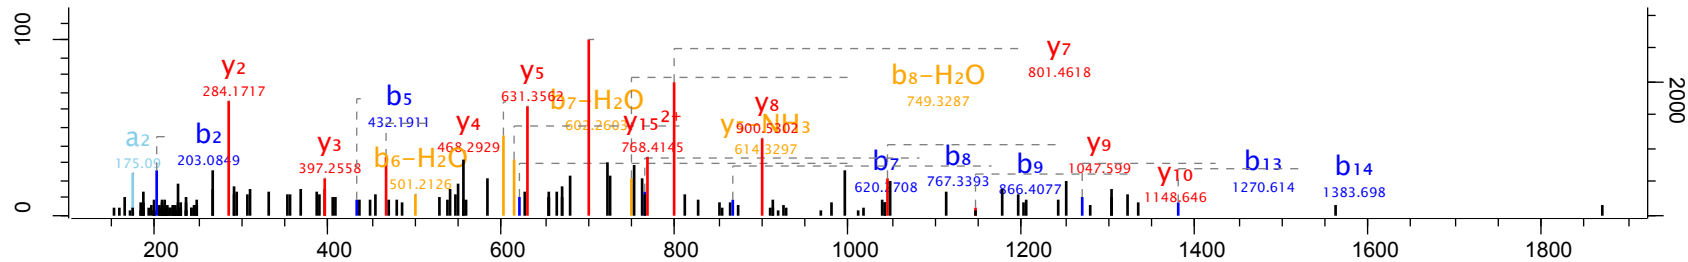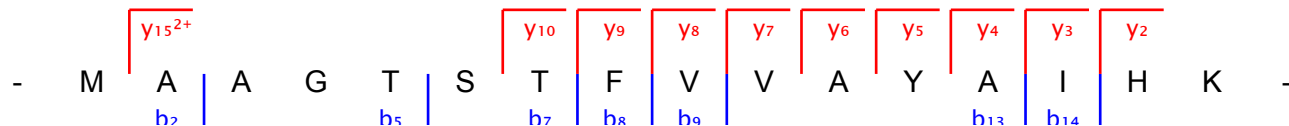

Raw file

20140925\_fract6\_dyn\_5ul\_B6\_01\_441

Scan

28115

Method

TOF; CID

Score

83.95

m/z

587.34

Gene names

GLTSCR1L

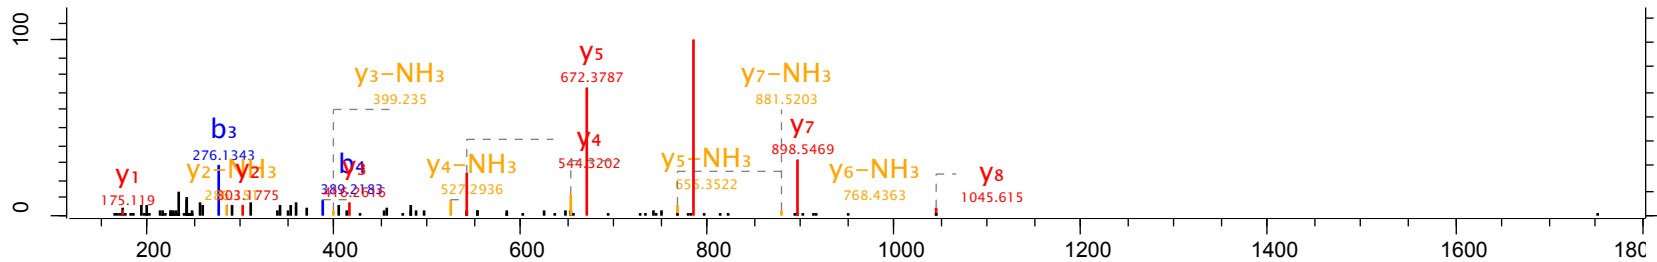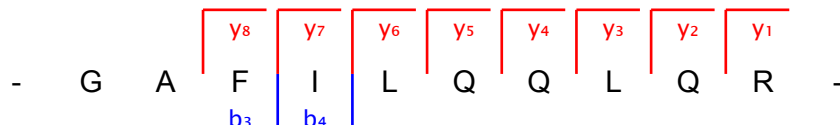

Raw file

20140925\_fract6\_dyn\_5ul\_B6\_01\_441

Scan

29609

Method

TOF; CID

Score

107.82

m/z

569.29

Gene names

CENPP

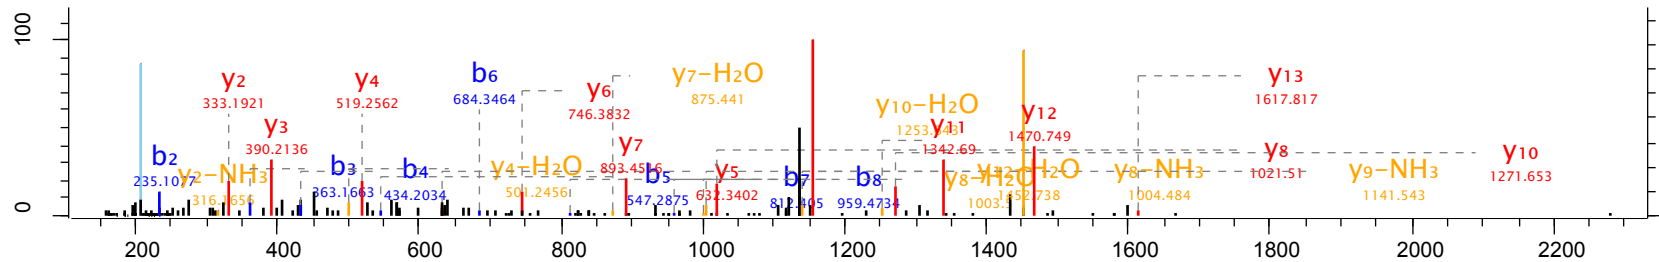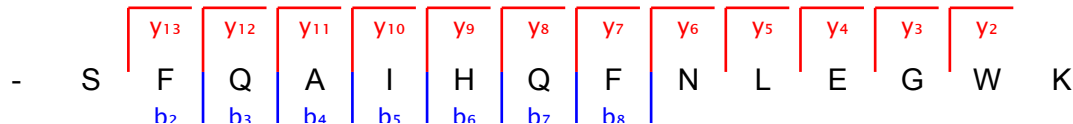

| Raw file                          | Scan  | Method   | Score | m/z    | Gene names |
|-----------------------------------|-------|----------|-------|--------|------------|
| 20140925_fract6_dyn_5ul_B6_01_441 | 29925 | TOF; CID | 67.23 | 725.03 | UBALD2     |

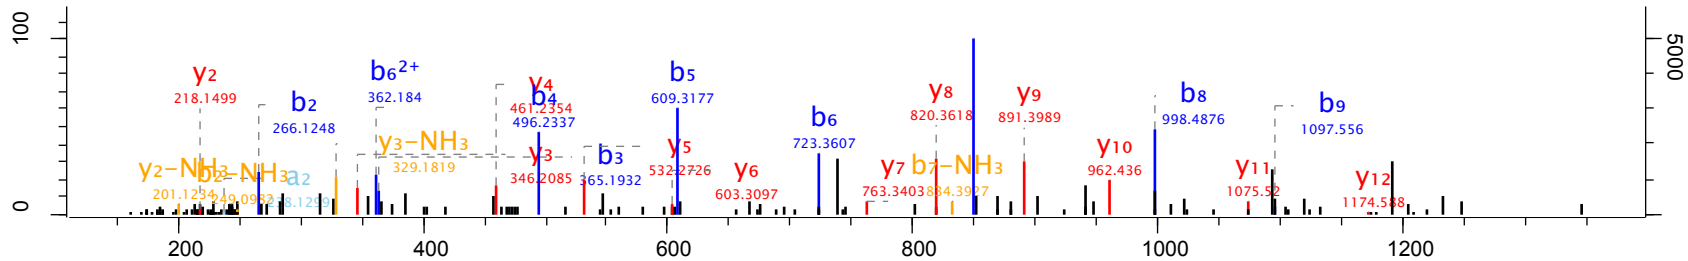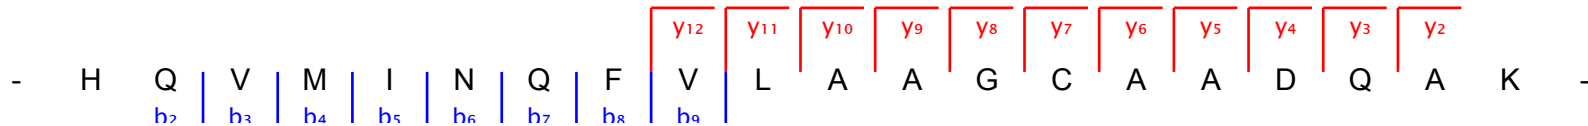

Raw file

Scan

Method

Score

m/z

Gene names

20140925\_fract6\_dyn\_5ul\_B6\_01\_441

32154

TOF; CID

55.84

834.43

TFR2

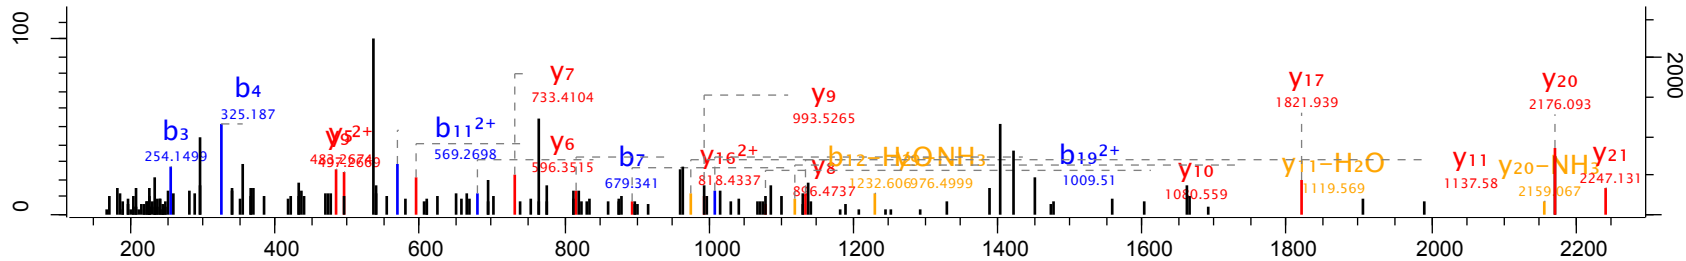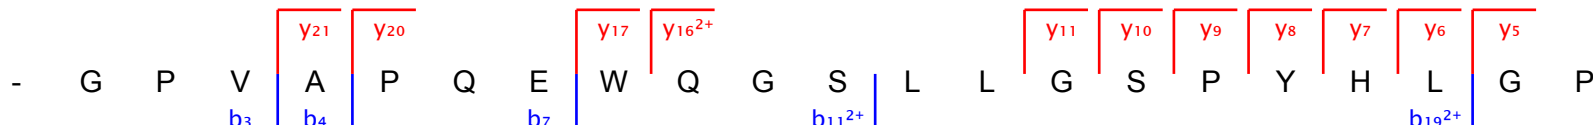



Raw file

20140925\_fract6\_dyn\_5ul\_B6\_01\_441

Scan

33623

Method

TOF; CID

Score

52.43

m/z

1021.04

Gene names

HIPK2;HIPK1

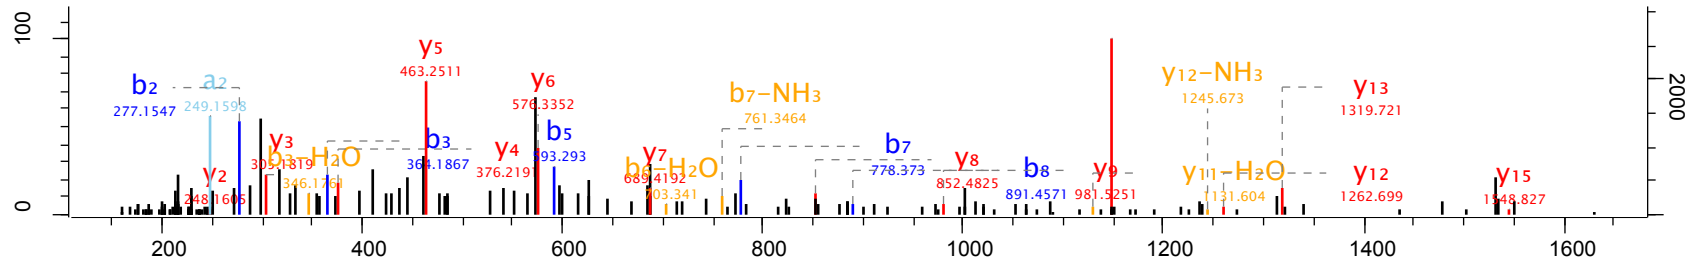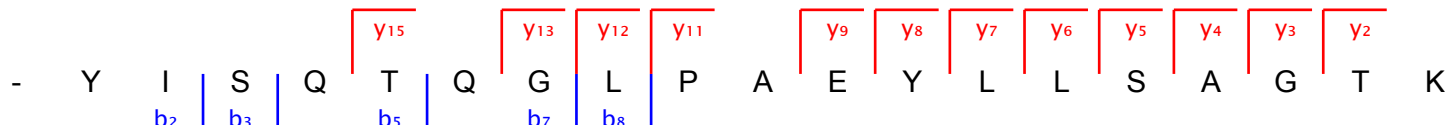

Raw file

20140925\_fract6\_dyn\_5ul\_B6\_01\_441

Scan

34441

Method

TOF; CID

Score

60.54

m/z

866.47

Gene names

TTC32

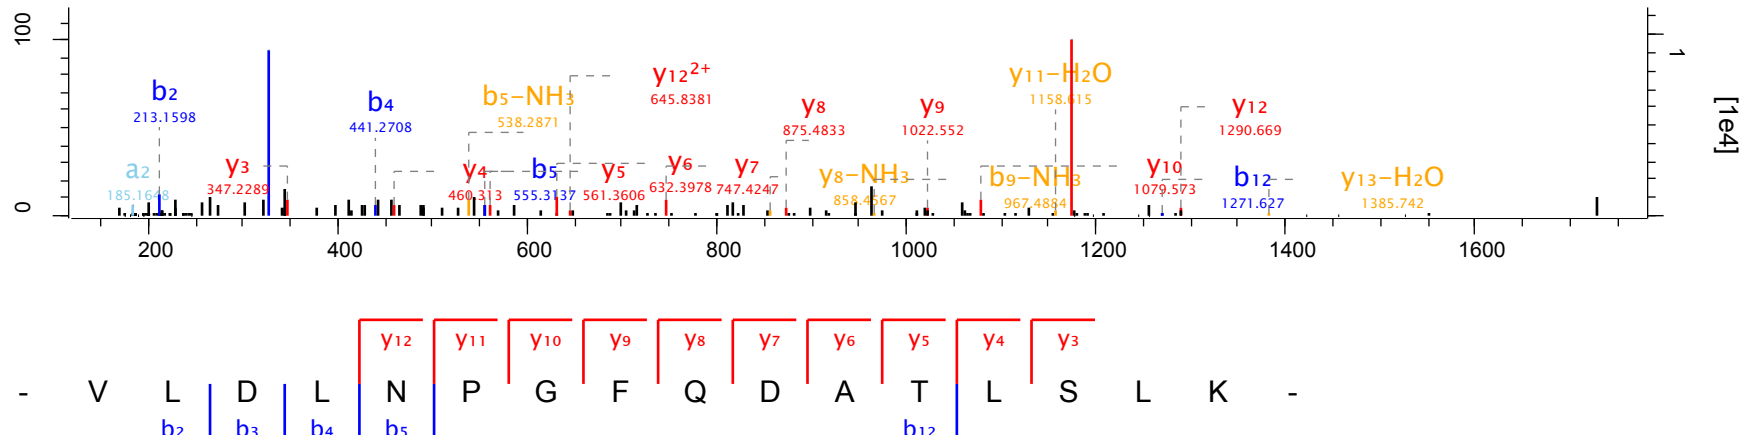

| Raw file                          | Scan  | Method   | Score | m/z    | Gene names   |
|-----------------------------------|-------|----------|-------|--------|--------------|
| 20140925_fract6_dyn_5ul_B6_01_441 | 38112 | TOF; CID | 31.55 | 809.42 | DOS;C19orf26 |

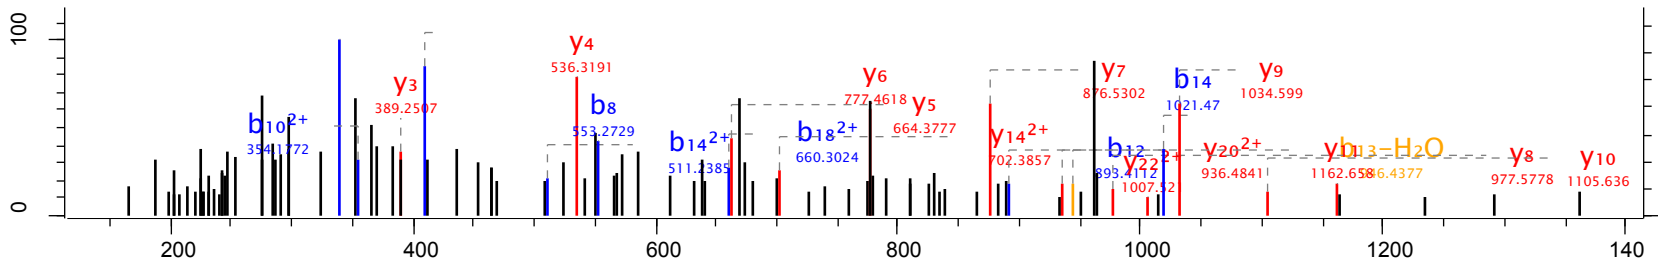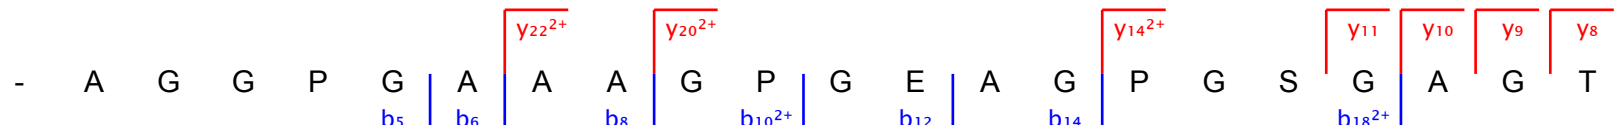

Raw file

20140925\_fract7\_dyn\_5ul\_B7\_01\_442

Scan

5466

Method

TOF; CID

Score

43.03

m/z

506.59

Gene names

STOX2;GDAP1

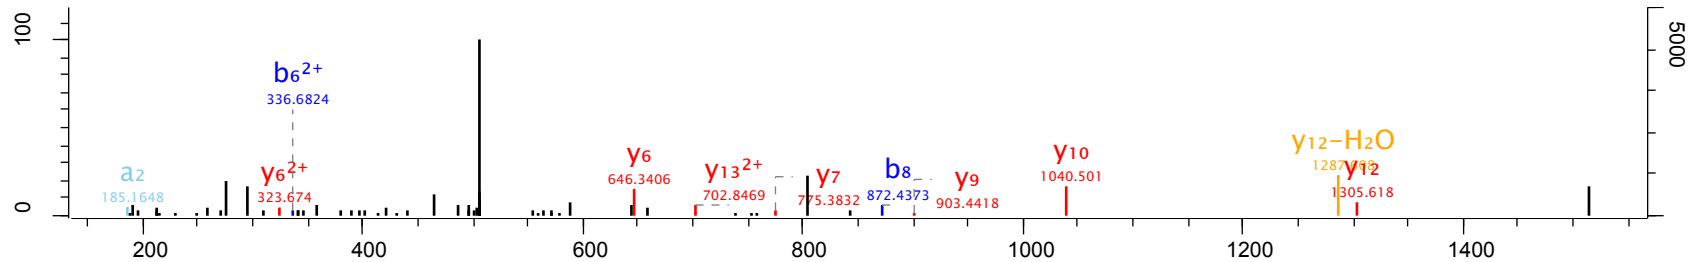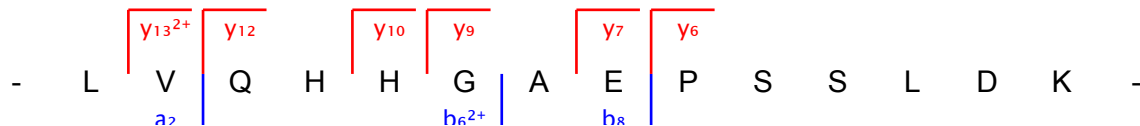

Raw file

20140925\_fract7\_dyn\_5ul\_B7\_01\_442

Scan

7569

Method

TOF; CID

Score

89.43

m/z

629.33

Gene names

CXCR4

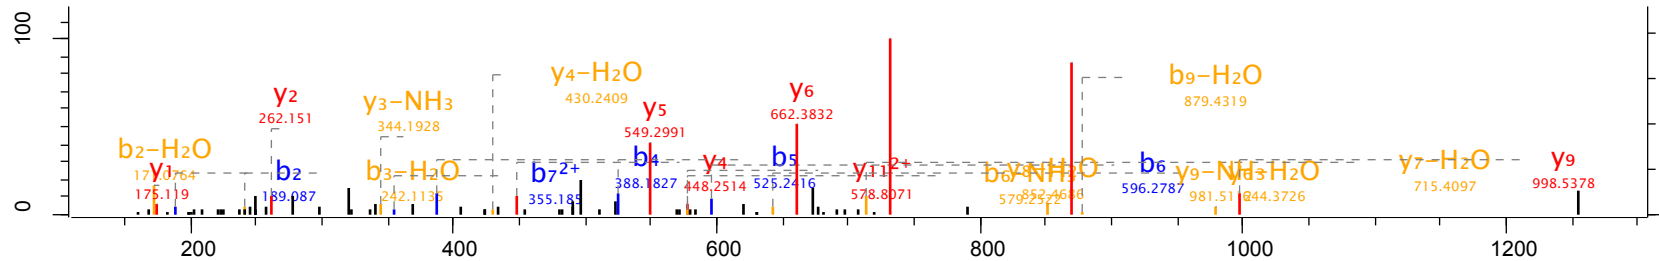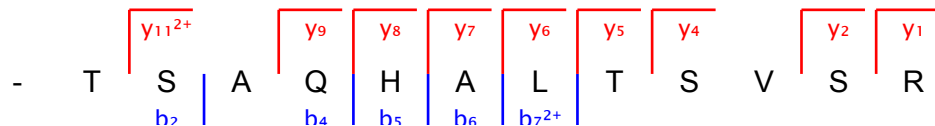

Raw file

20140925\_fract7\_dyn\_5ul\_B7\_01\_442

Scan

8519

Method

TOF; CID

Score

92.86

m/z

705.84

Gene names

TBPL1

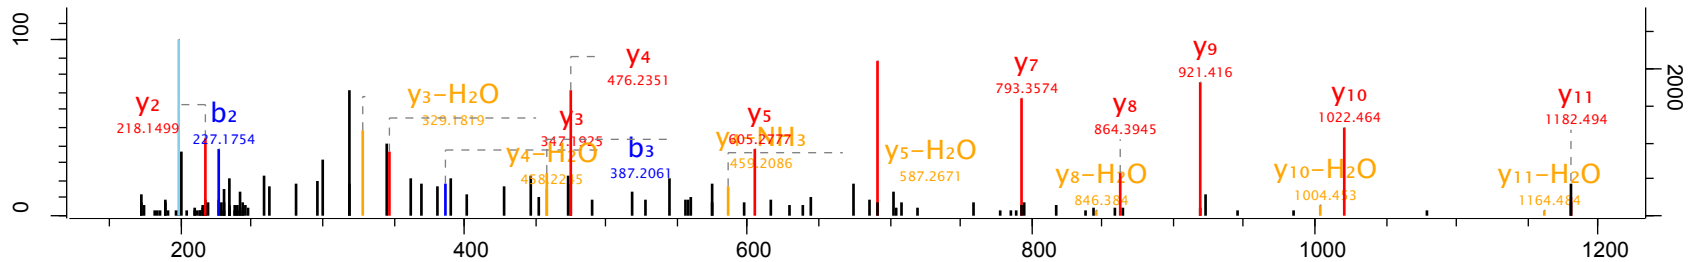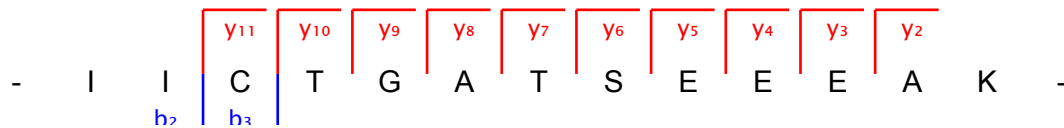

Raw file

Scan

Method

Score

m/z

20140925\_fract7\_dyn\_5ul\_B7\_01\_442

11359

TOF; CID

58.1

608.79

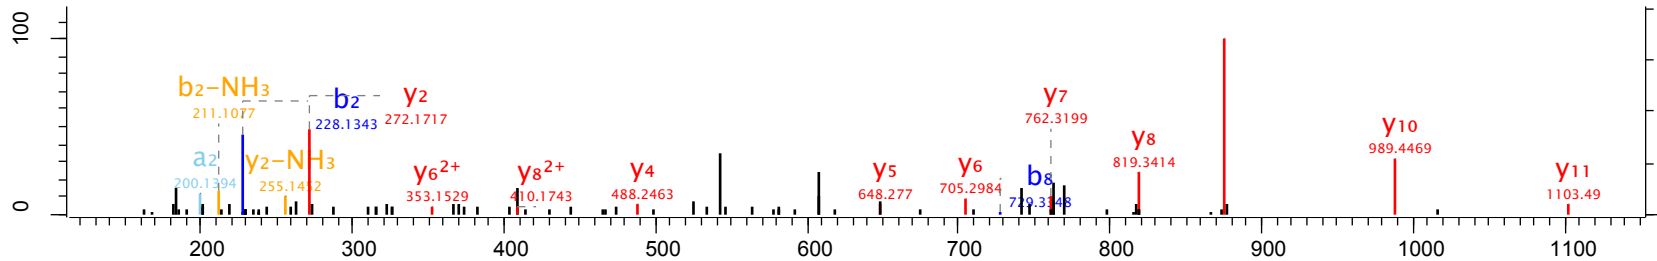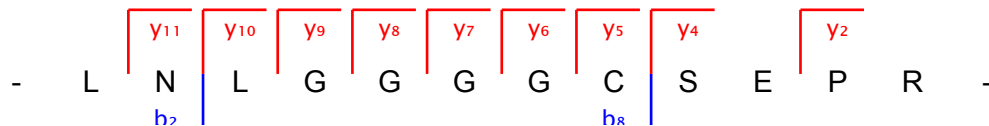

Raw file

Scan

Method

Score

m/z

Gene names

20140925\_fract7\_dyn\_5ul\_B7\_01\_442

11706

TOF; CID

66.15

690.34

DMTF1

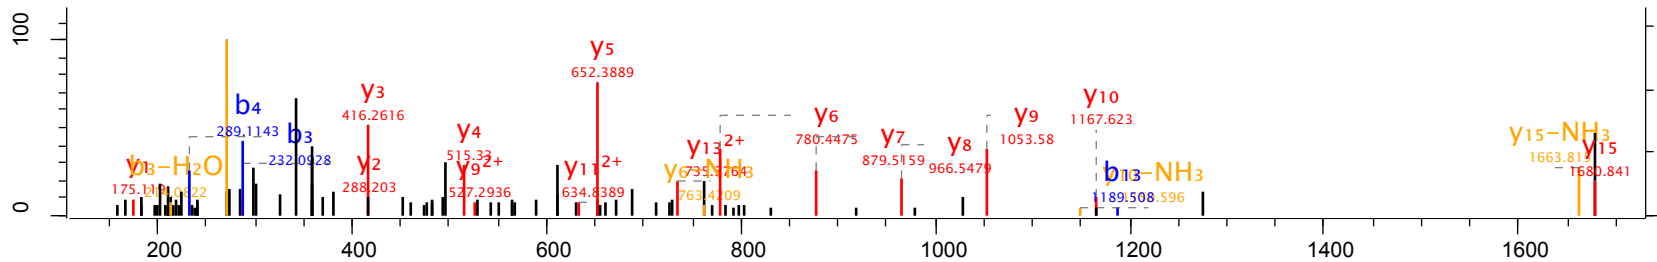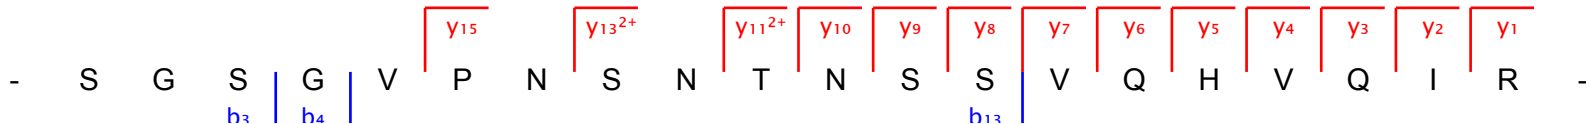



Raw file

20140925\_fract7\_dyn\_5ul\_B7\_01\_442

Scan

12226

Method

TOF; CID

Score

76.24

m/z

836.05

Gene names

TMEM39B

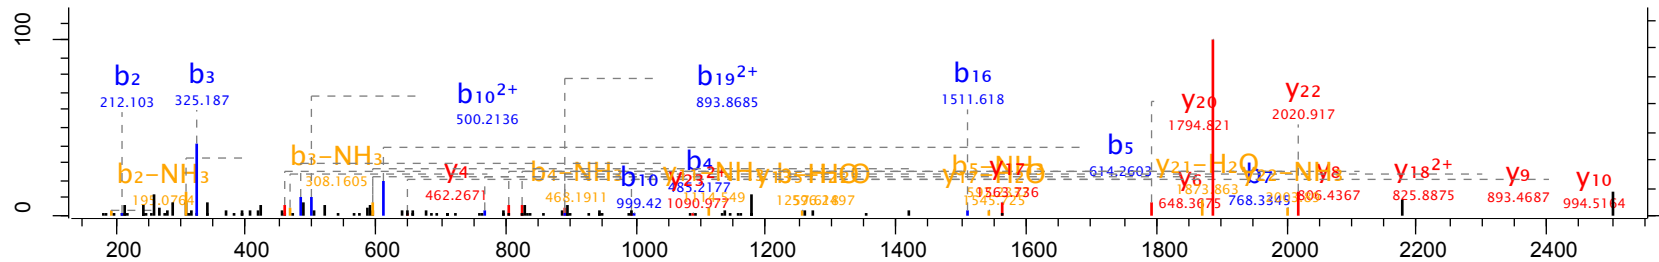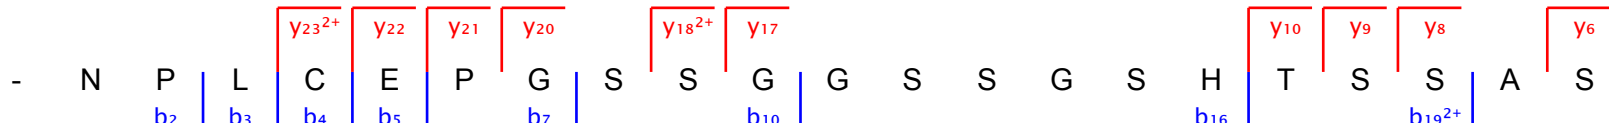

Raw file

20140925\_fract7\_dyn\_5ul\_B7\_01\_442

Scan

17185

Method

TOF; CID

Score

55.66

m/z

777.89

Gene names

C10orf35

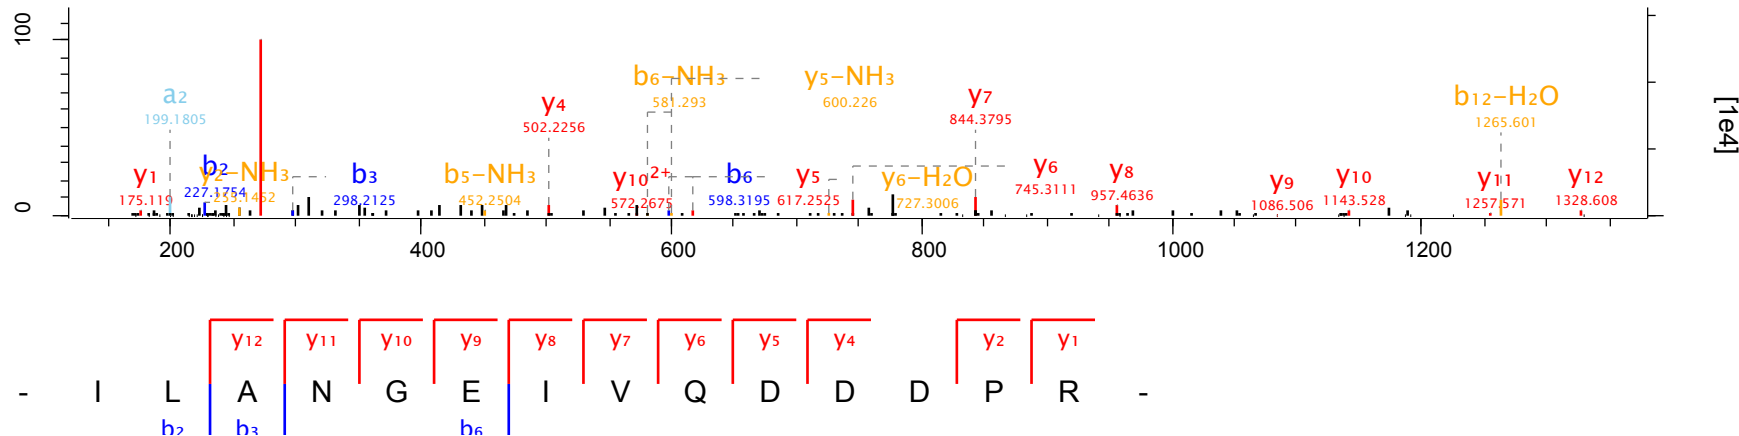

Raw file

20140925\_fract7\_dyn\_5ul\_B7\_01\_442

Scan

17433

Method

TOF; CID

Score

49.93

m/z

452.9

Gene names

UBXN2A

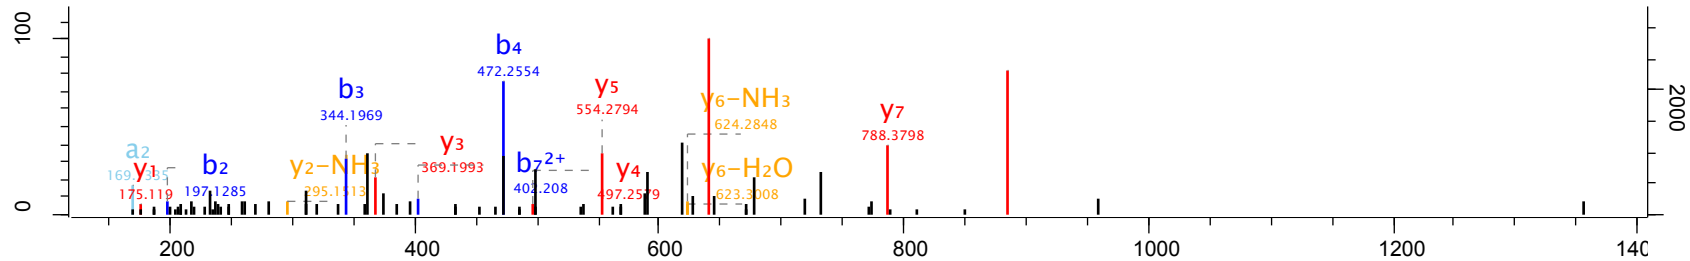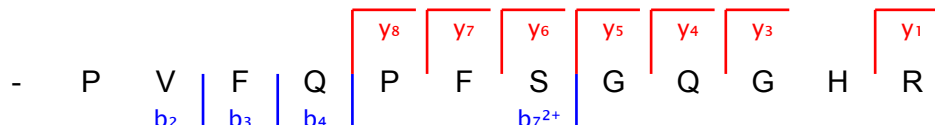

Raw file

20140925\_fract7\_dyn\_5ul\_B7\_01\_442

Scan

18863

Method

TOF; CID

Score

88.08

m/z

794.39

Gene names

GPNMB

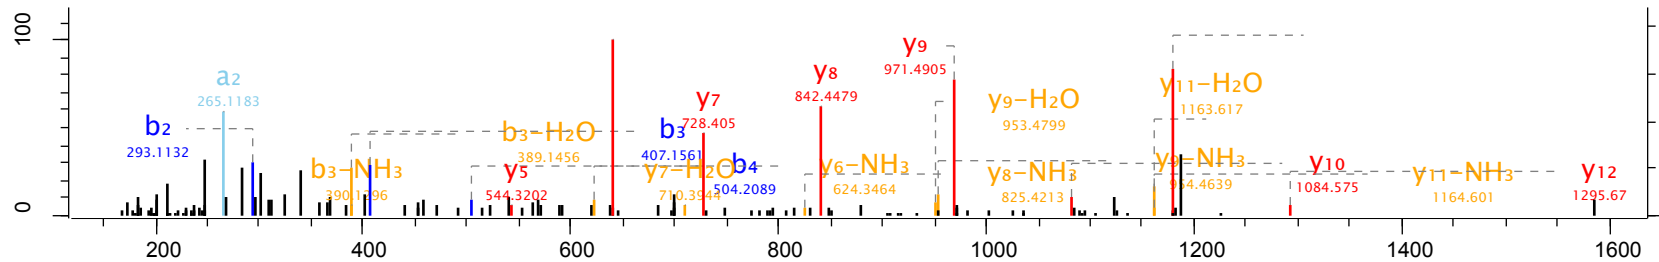

- E Y N P I E N S P G N V V R -

b<sub>2</sub> b<sub>3</sub> b<sub>4</sub> y<sub>12</sub> y<sub>11</sub> y<sub>10</sub> y<sub>9</sub> y<sub>8</sub> y<sub>7</sub> y<sub>6</sub> y<sub>5</sub>

| Raw file                          | Scan  | Method   | Score | m/z    | Gene names |
|-----------------------------------|-------|----------|-------|--------|------------|
| 20140925_fract7_dyn_5ul_B7_01_442 | 19373 | TOF; CID | 42.71 | 678.33 | ODF2L      |

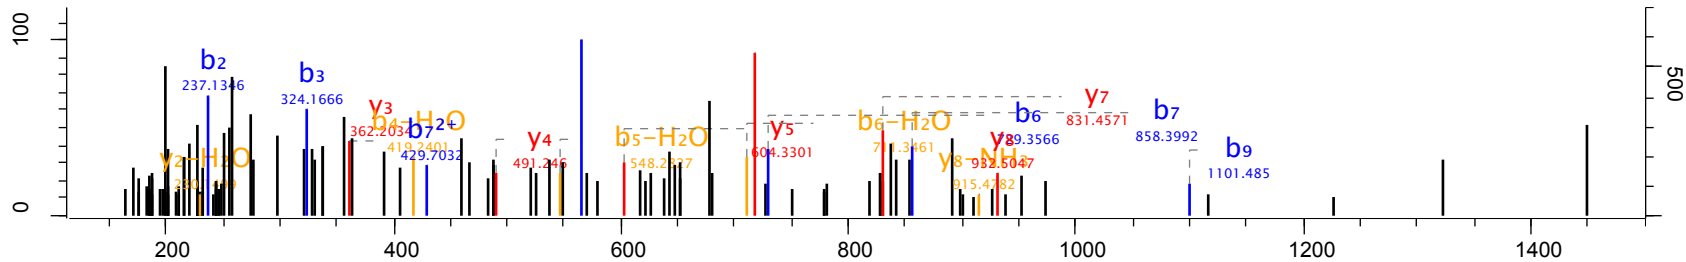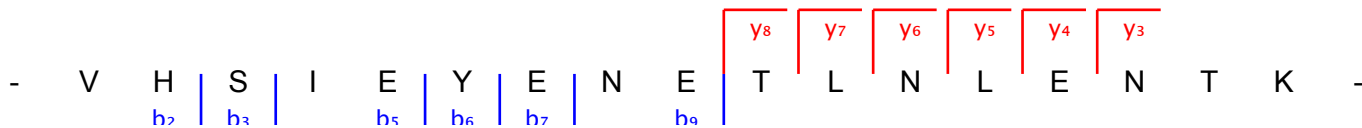

Raw file

20140925\_fract7\_dyn\_5ul\_B7\_01\_442

Scan

19862

Method

TOF; CID

Score

69.82

m/z

616.31

Gene names

ZDHHC8

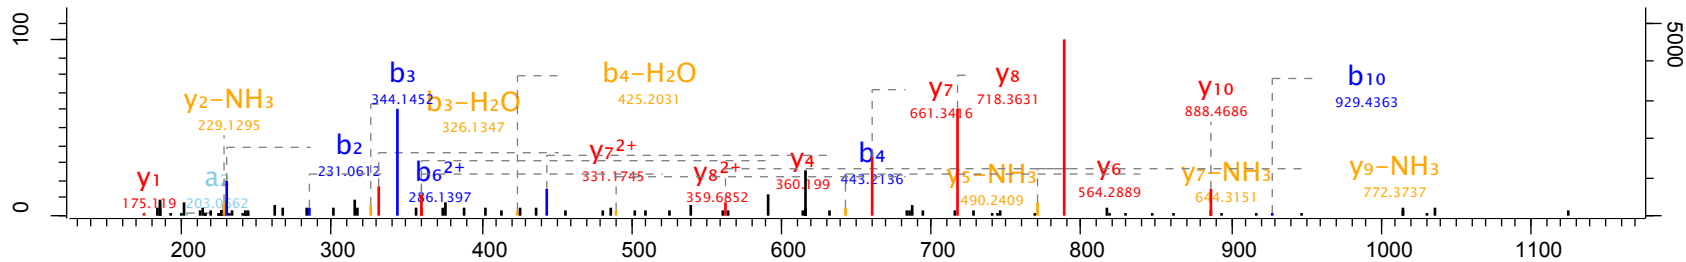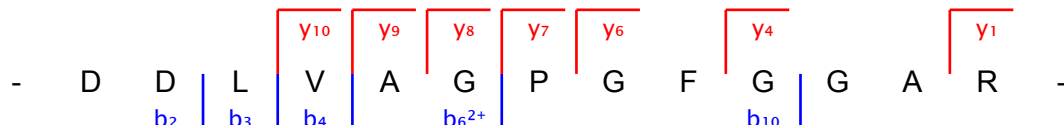

| Raw file                          | Scan  | Method   | Score | m/z     | Gene names |
|-----------------------------------|-------|----------|-------|---------|------------|
| 20140925_fract7_dyn_5ul_B7_01_442 | 21649 | TOF; CID | 50.94 | 1098.01 | BRPF3      |

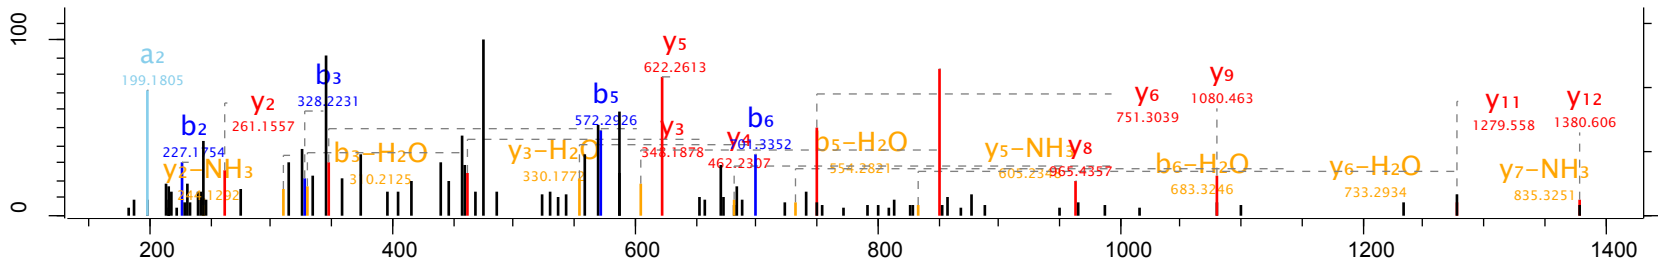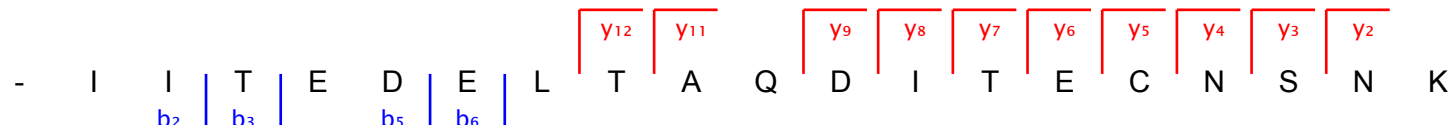

Raw file

20140925\_fract7\_dyn\_5ul\_B7\_01\_442

Scan

22742

Method

TOF; CID

Score

113.76

m/z

800.37

Gene names

CTNNBIP1

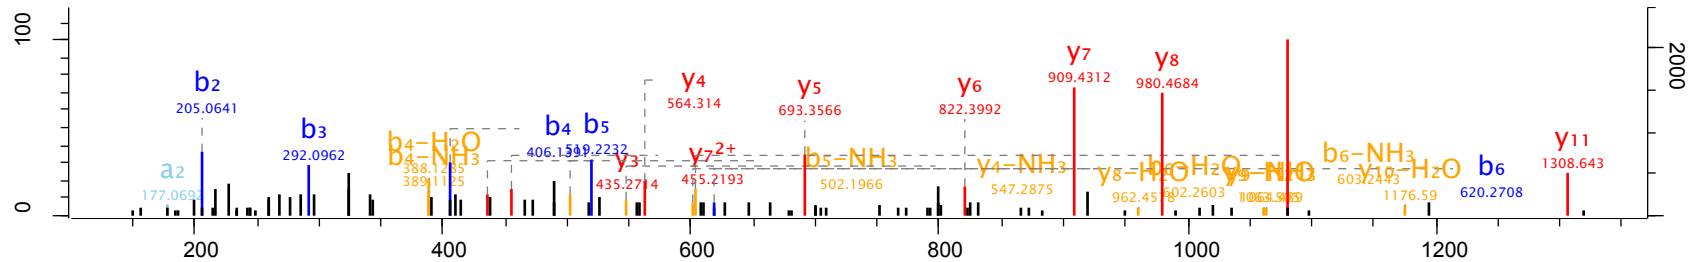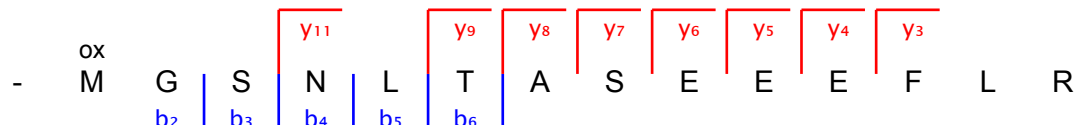



Raw file

20140925\_fract7\_dyn\_5ul\_B7\_01\_442

Scan

23880

Method

TOF; CID

Score

105.53

m/z

617.97

Gene names

HNRNPH1

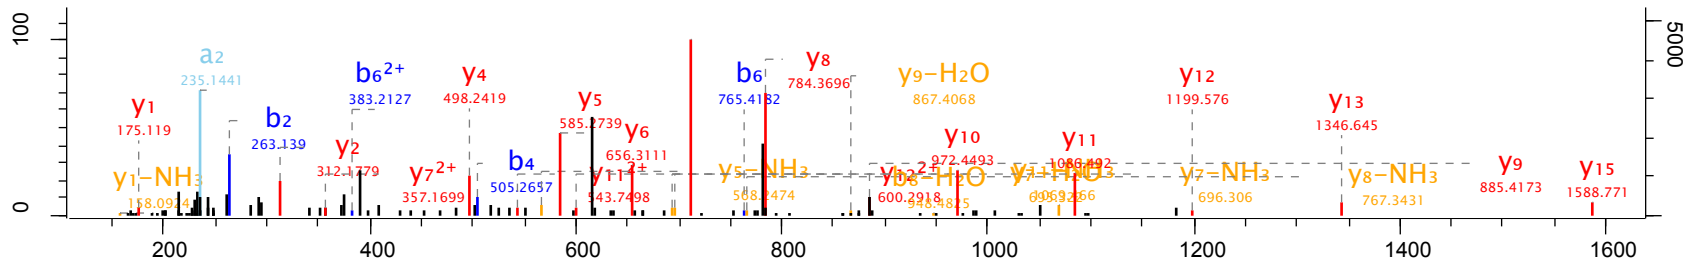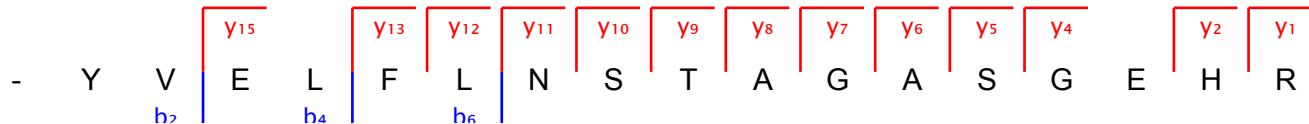

| Raw file                          | Scan  | Method   | Score | m/z    | Gene names |
|-----------------------------------|-------|----------|-------|--------|------------|
| 20140925_fract7_dyn_5ul_B7_01_442 | 23891 | TOF; CID | 74.46 | 574.84 | ANKEF1     |

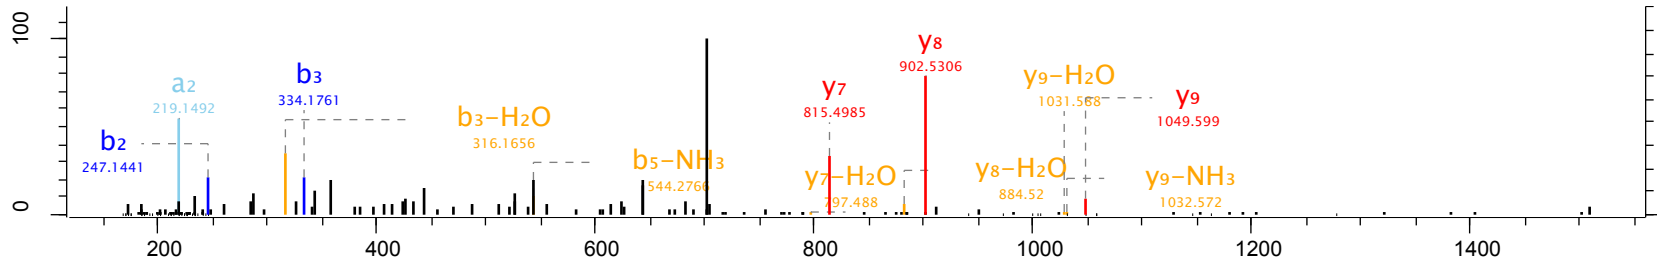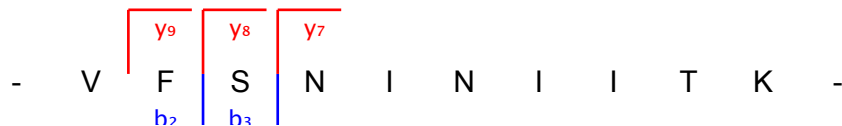

Raw file

20140925\_fract7\_dyn\_5ul\_B7\_01\_442

Scan

24744

Method

TOF; CID

Score

105.98

m/z

603.31

Gene names

TAF13

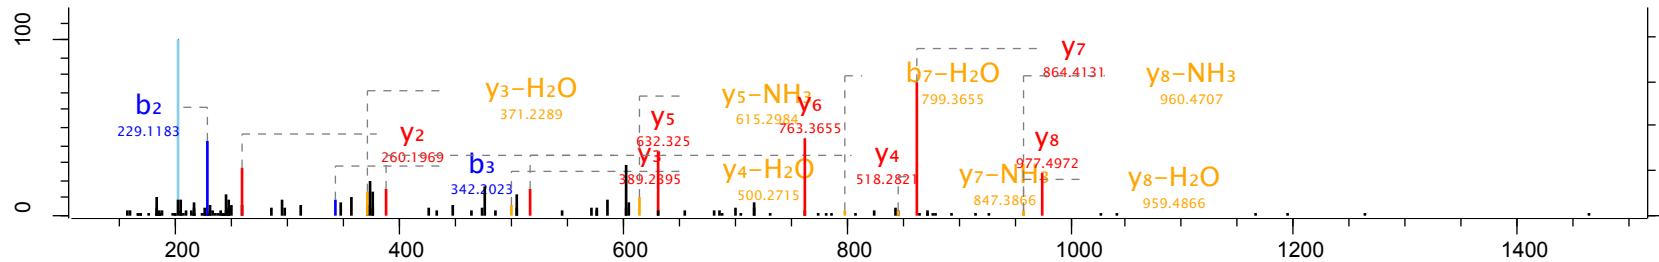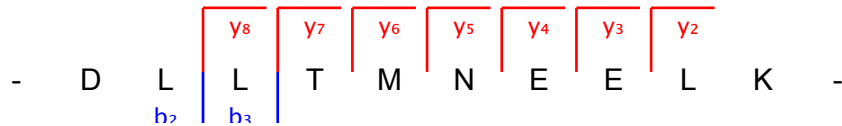

Raw file

20140925\_fract7\_dyn\_5ul\_B7\_01\_442

Scan

24899

Method

TOF; CID

Score

56.87

m/z

878.92

Gene names

INPP5A

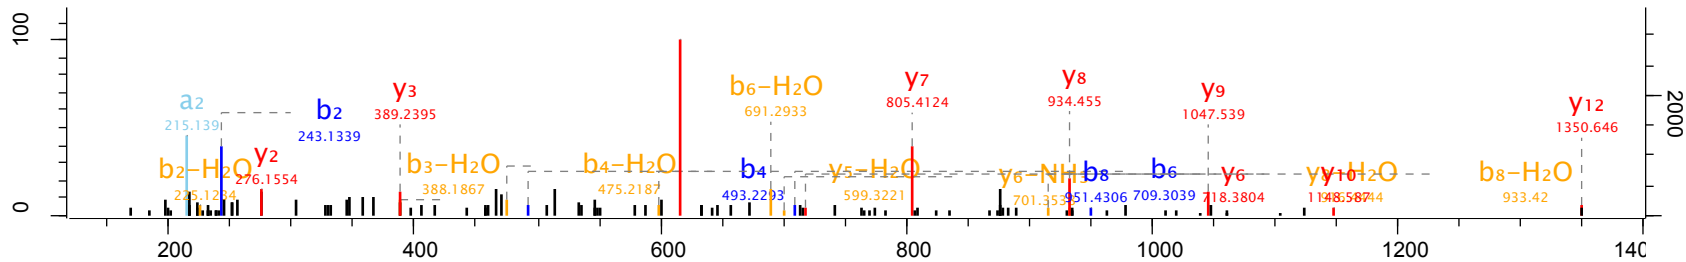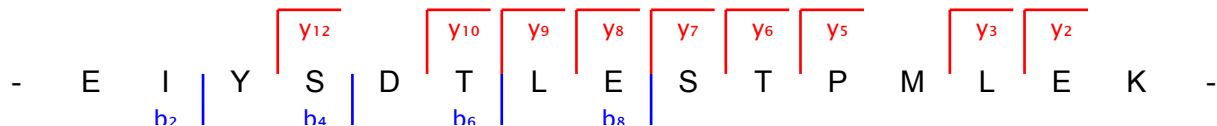

| Raw file                          | Scan  | Method   | Score | m/z | Gene names |
|-----------------------------------|-------|----------|-------|-----|------------|
| 20140925_fract7_dyn_5ul_B7_01_442 | 32048 | TOF; CID | 91.4  | 996 | PTTG1IP    |

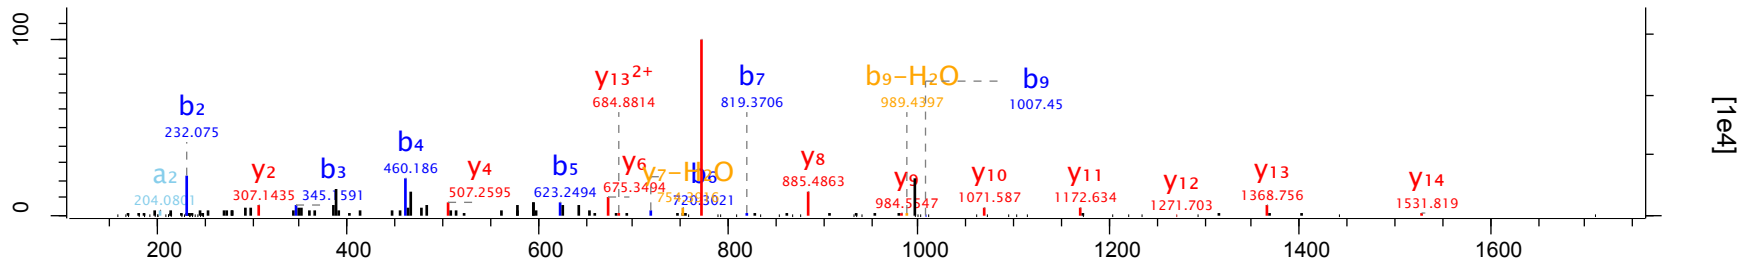

- A C | L | D Y P V T S V L P P A S L C K -

h<sub>2</sub> | h<sub>3</sub> | h<sub>4</sub> | h<sub>5</sub> | h<sub>6</sub> | h<sub>7</sub> | h<sub>9</sub>

y<sub>14</sub> | y<sub>13</sub> | y<sub>12</sub> | y<sub>11</sub> | y<sub>10</sub> | y<sub>9</sub> | y<sub>8</sub> | y<sub>7</sub> | y<sub>6</sub> | y<sub>4</sub> | y<sub>2</sub>

Raw file

20140925\_fract7\_dyn\_5ul\_B7\_01\_442

Scan

32461

Method

TOF; CID

Score

75.3

m/z

868.78

Gene names

ICAM5

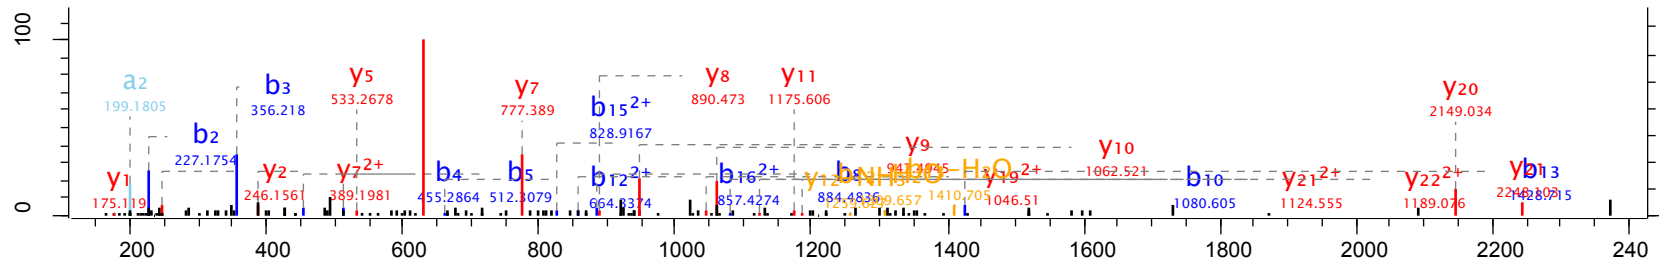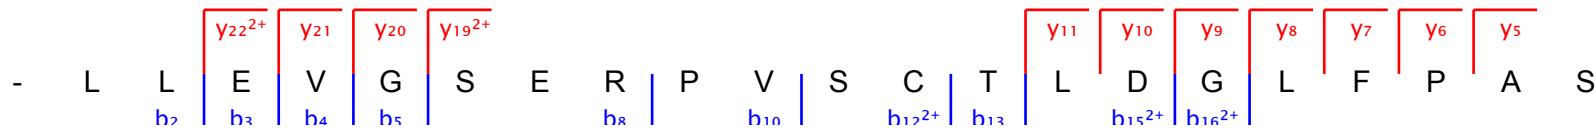

| Raw file                          | Scan  | Method   | Score | m/z    | Gene names |
|-----------------------------------|-------|----------|-------|--------|------------|
| 20140925_fract7_dyn_5ul_B7_01_442 | 34350 | TOF; CID | 63.69 | 891.99 | PPP1R3F    |

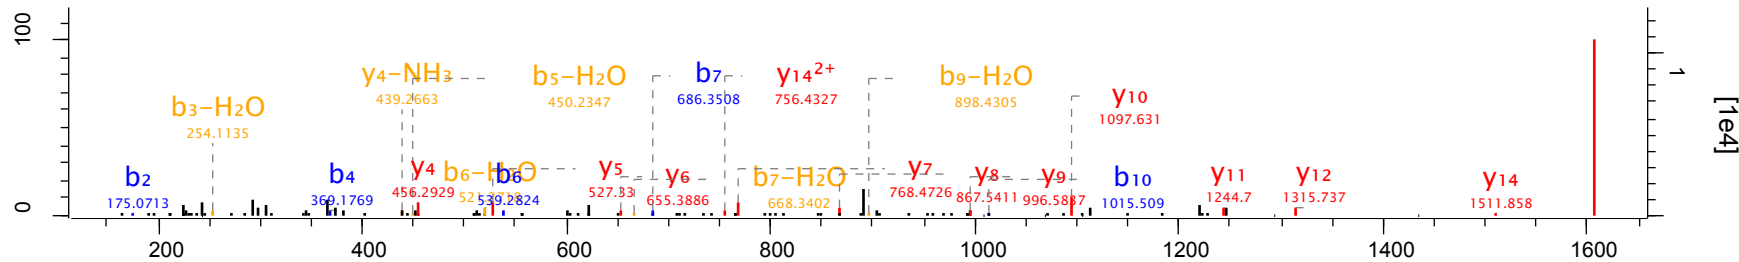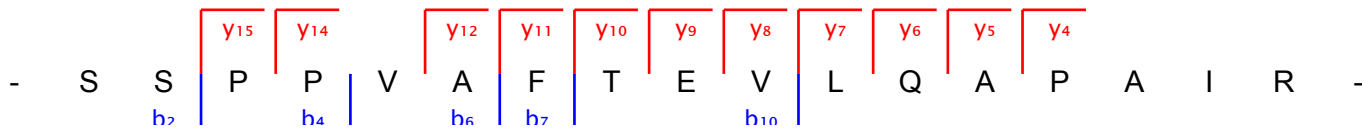

| Raw file                          | Scan  | Method   | Score | m/z   | Gene names |
|-----------------------------------|-------|----------|-------|-------|------------|
| 20140925_fract7_dyn_5ul_B7_01_442 | 35244 | TOF; CID | 71.08 | 886.4 | HOXC11     |

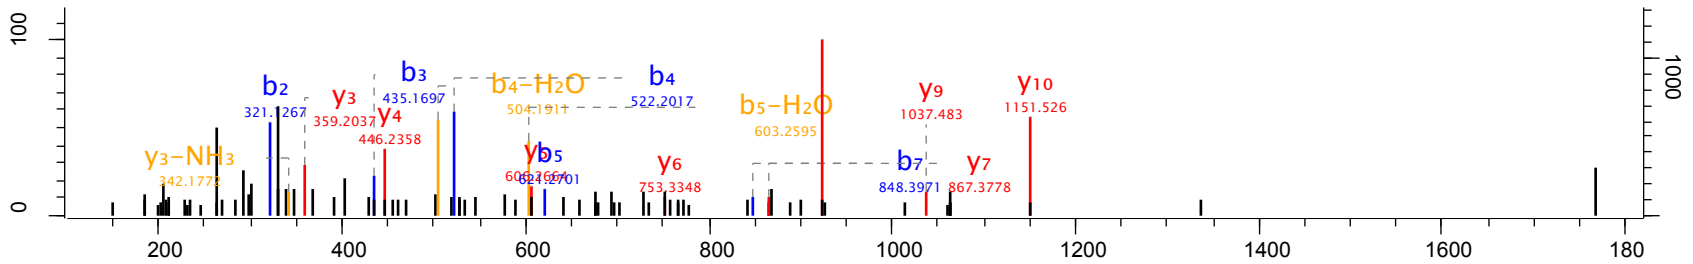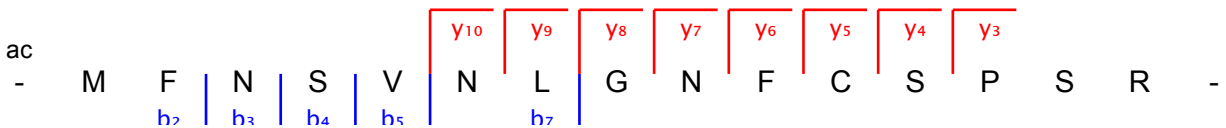



Raw file

20140925\_fract7\_dyn\_5ul\_B7\_01\_442

Scan

35325

Method

TOF; CID

Score

56.82

m/z

839.42

Gene names

ZRANB3

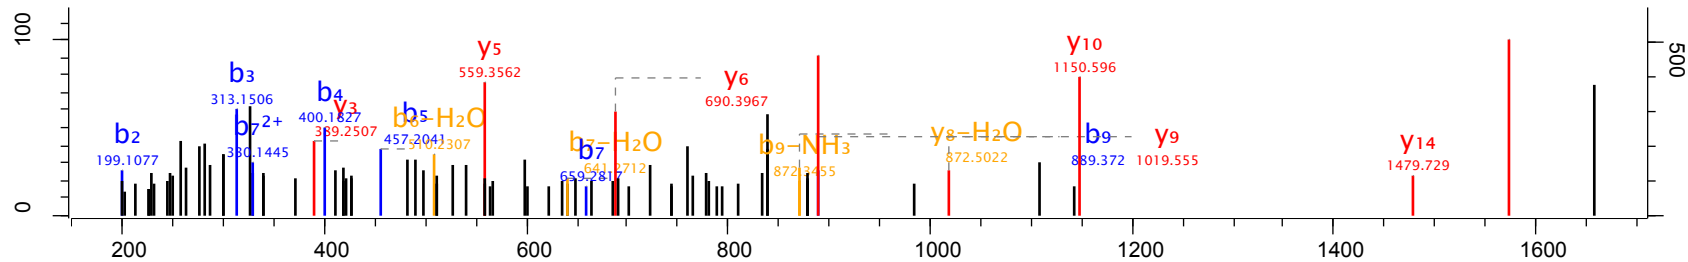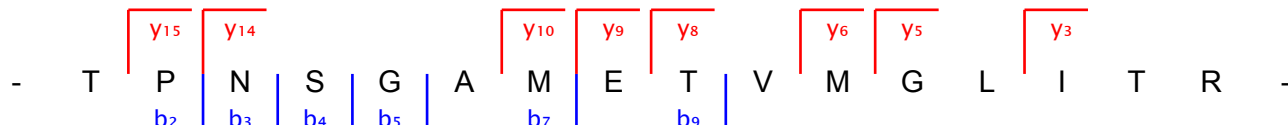

Raw file

20140925\_fract8\_dyn\_5ul\_B8\_01\_443

Scan

5102

Method

TOF; CID

Score

79.47

m/z

313.85

Gene names

ZNF212

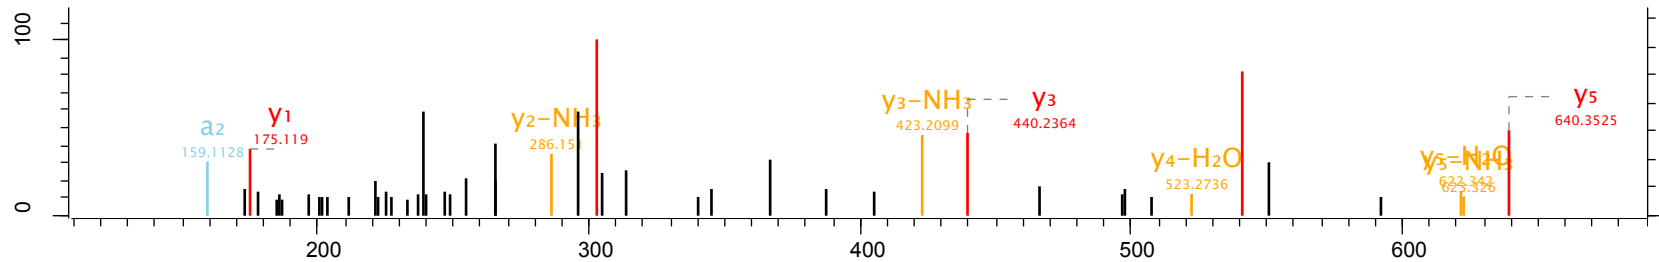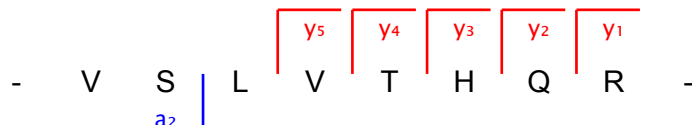

Raw file

20140925\_fract8\_dyn\_5ul\_B8\_01\_443

Scan

9002

Method

TOF; CID

Score

101.05

m/z

612.97

Gene names

THRB

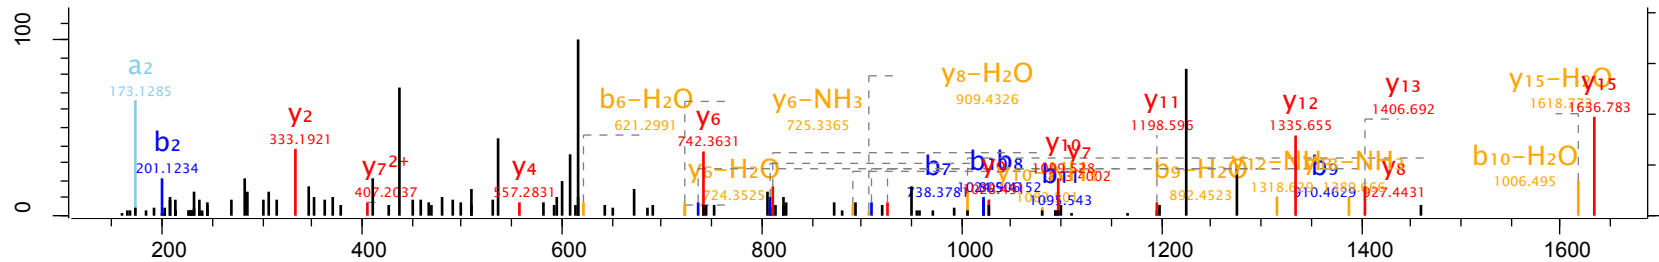

- T V T E A H V A T N A Q G S H W K -

b<sub>2</sub> h<sub>7</sub> h<sub>8</sub> h<sub>9</sub> h<sub>10</sub> h<sub>11</sub> y<sub>15</sub> y<sub>13</sub> y<sub>12</sub> y<sub>11</sub> y<sub>10</sub> y<sub>9</sub> y<sub>8</sub> y<sub>7</sub> y<sub>6</sub> y<sub>4</sub> y<sub>2</sub>

Raw file

20140925\_fract8\_dyn\_5ul\_B8\_01\_443

Scan

9549

Method

TOF; CID

Score

103.26

m/z

574.32

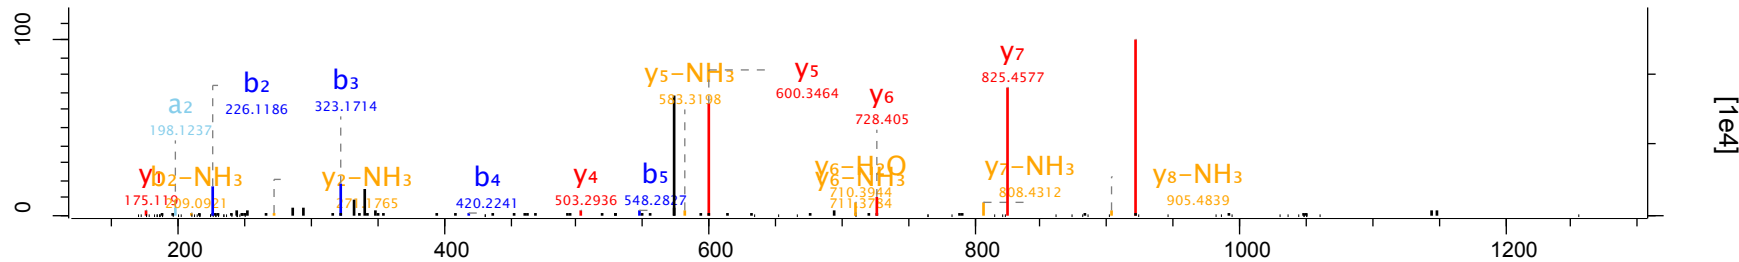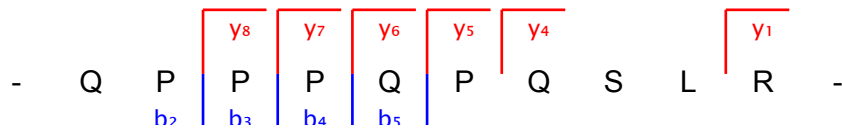

Raw file

Scan

Method

Score

m/z

Gene names

20140925\_fract8\_dyn\_5ul\_B8\_01\_443

12927

TOF; CID

79.12

339.16

AQP3

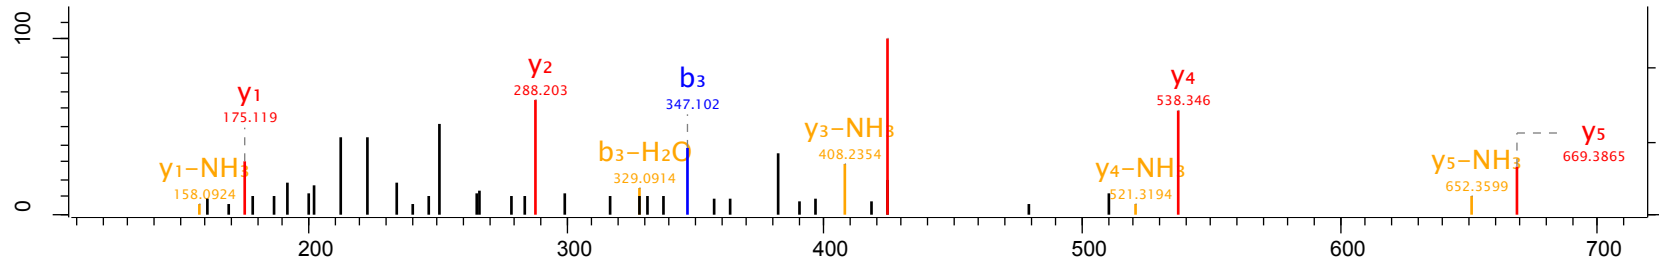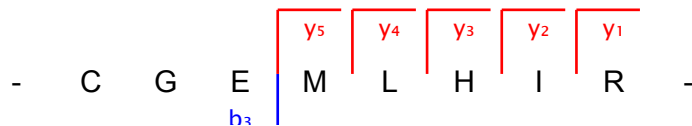

| Raw file                          | Scan  | Method   | Score | m/z    | Gene names |
|-----------------------------------|-------|----------|-------|--------|------------|
| 20140925_fract8_dyn_5ul_B8_01_443 | 13166 | TOF; CID | 97.73 | 578.79 | TMEM254    |

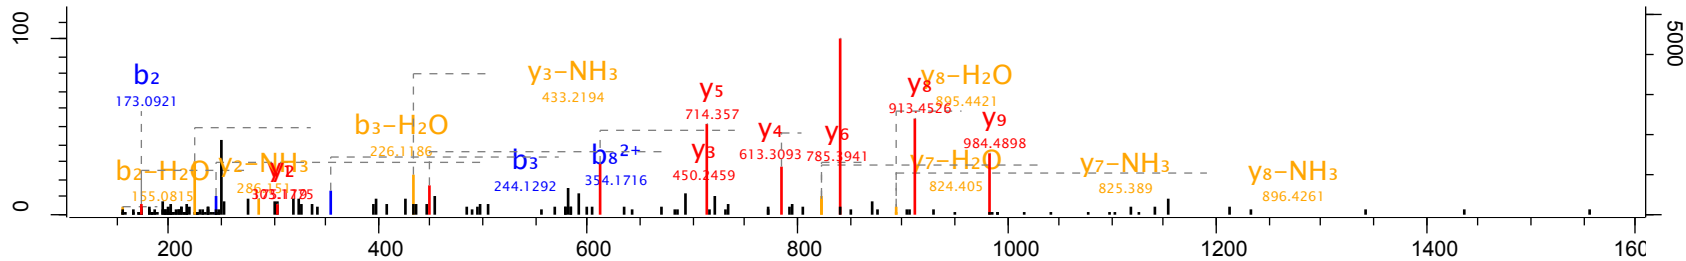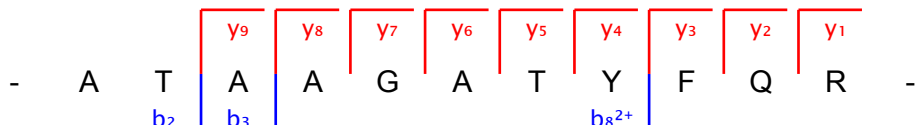

Raw file

20140925\_fract8\_dyn\_5ul\_B8\_01\_443

Scan

14497

Method

TOF; CID

Score

107.82

m/z

874.92

Gene names

TMEM181

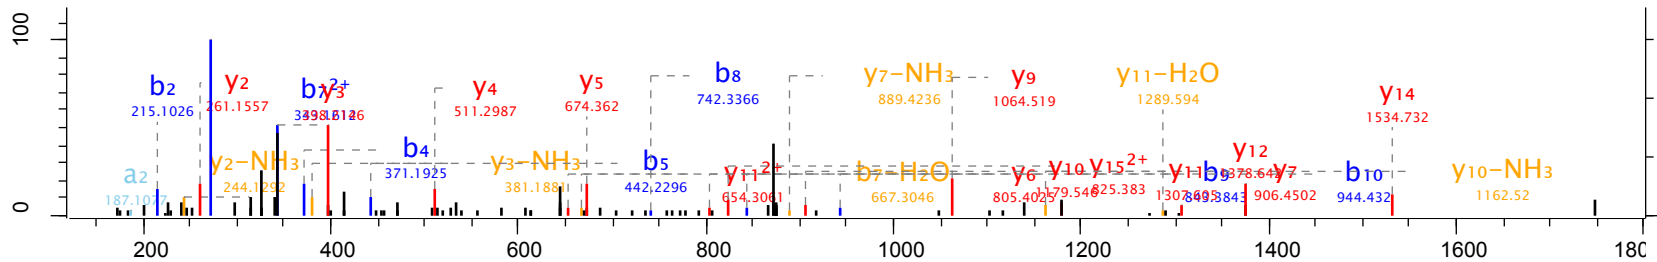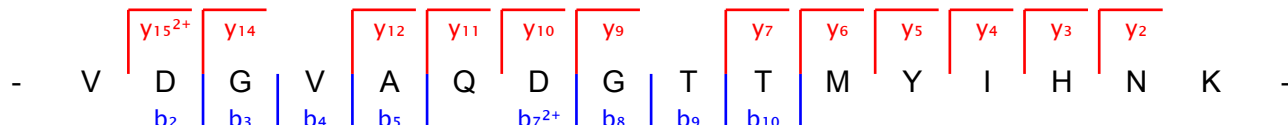

| Raw file                          | Scan  | Method   | Score | m/z    | Gene names |
|-----------------------------------|-------|----------|-------|--------|------------|
| 20140925_fract8_dyn_5ul_B8_01_443 | 16430 | TOF; CID | 74.13 | 560.28 | UBTD1      |

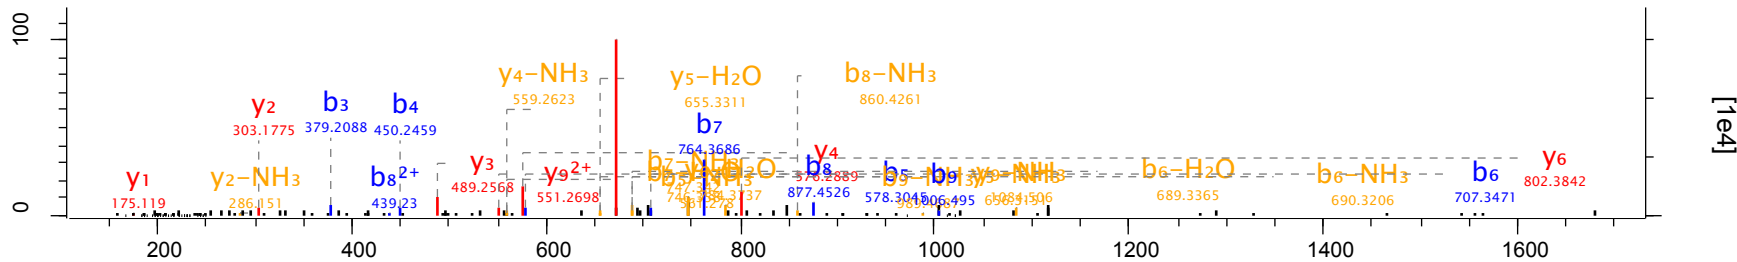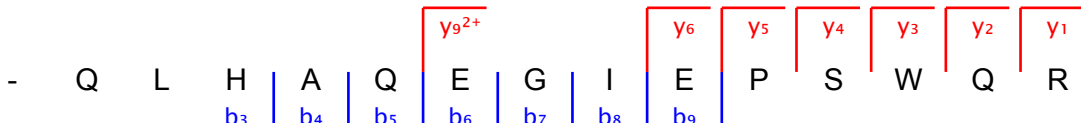



Raw file

20140925\_fract8\_dyn\_5ul\_B8\_01\_443

Scan

16846

Method

TOF; CID

Score

91.7

m/z

439.91

Gene names

PIGP

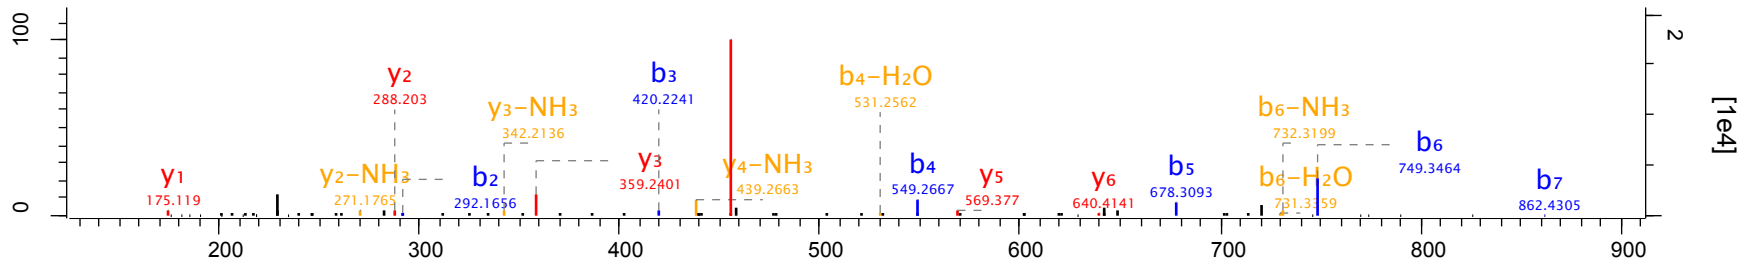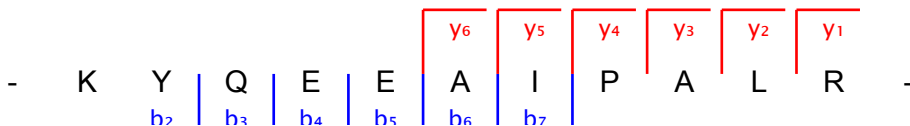

| Raw file                          | Scan  | Method   | Score | m/z    | Gene names |
|-----------------------------------|-------|----------|-------|--------|------------|
| 20140925_fract8_dyn_5ul_B8_01_443 | 16943 | TOF; CID | 71.9  | 566.29 | C6orf57    |

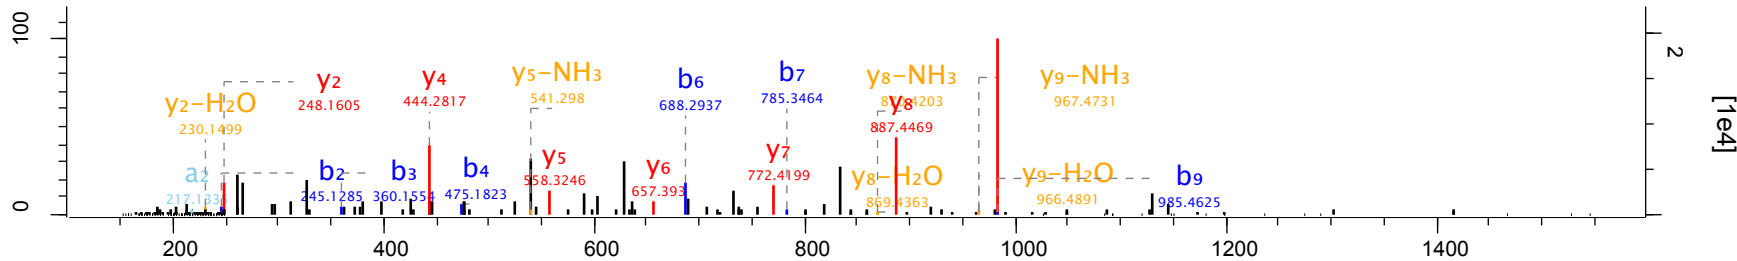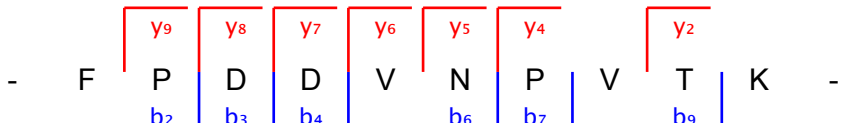

Raw file

20140925\_fract8\_dyn\_5ul\_B8\_01\_443

Scan

19351

Method

TOF; CID

Score

44.83

m/z

804.38

Gene names

HOXA13

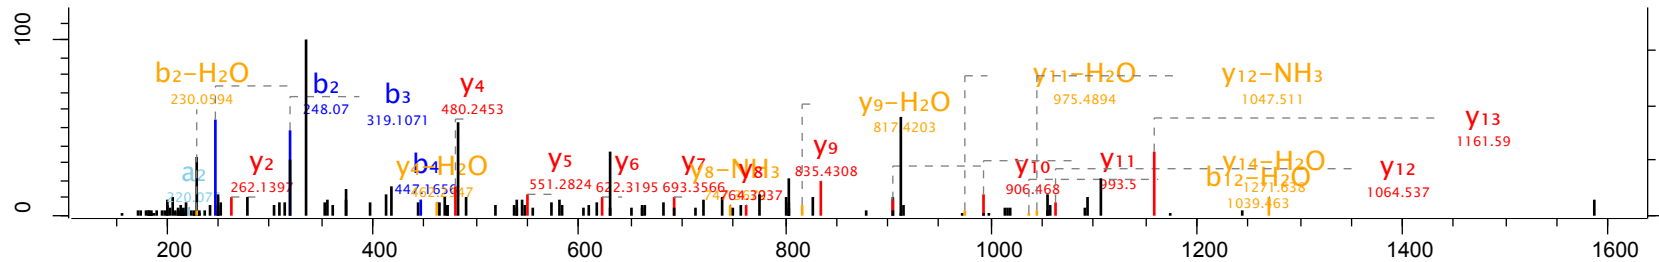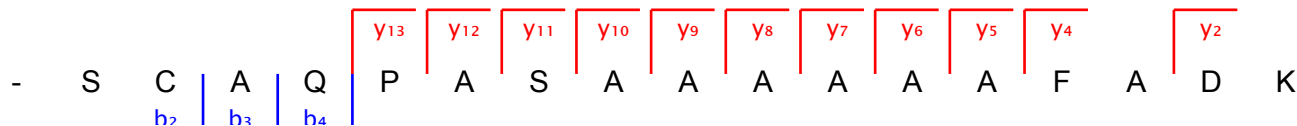

| Raw file                          | Scan  | Method   | Score  | m/z    | Gene names |
|-----------------------------------|-------|----------|--------|--------|------------|
| 20140925_fract8_dyn_5ul_B8_01_443 | 21321 | TOF; CID | 111.94 | 639.35 | ALG14      |

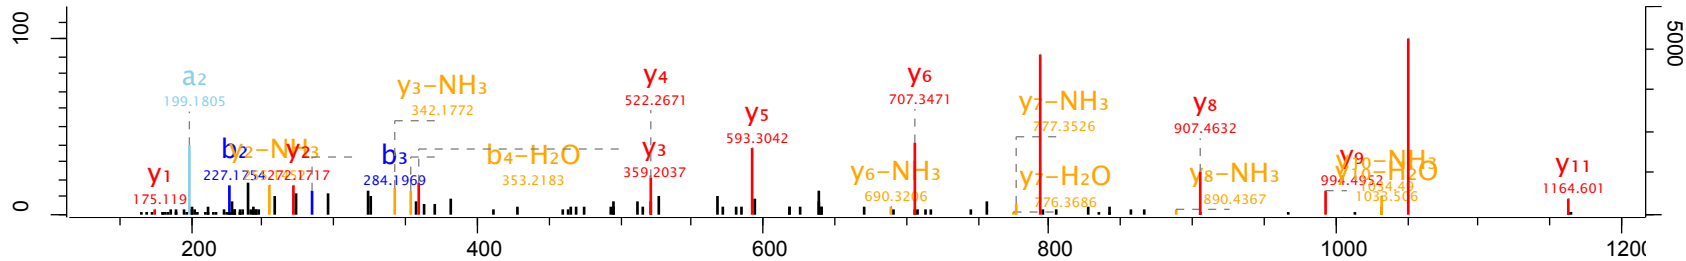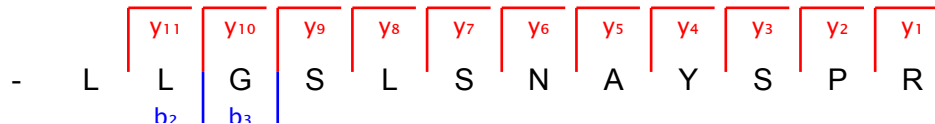

| Raw file                          | Scan  | Method   | Score | m/z    | Gene names |
|-----------------------------------|-------|----------|-------|--------|------------|
| 20140925_fract8_dyn_5ul_B8_01_443 | 22789 | TOF; CID | 53.87 | 670.36 | CSTA       |

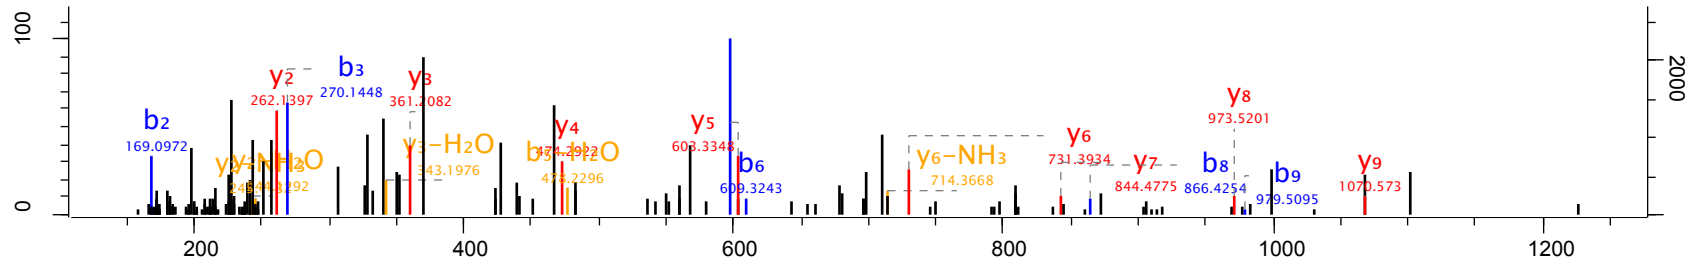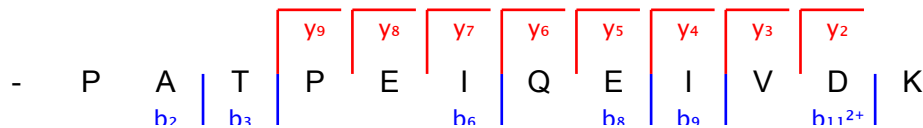

| Raw file                          | Scan  | Method   | Score | m/z    | Gene names |
|-----------------------------------|-------|----------|-------|--------|------------|
| 20140925_fract8_dyn_5ul_B8_01_443 | 23769 | TOF; CID | 56.82 | 789.41 | CELSR1     |

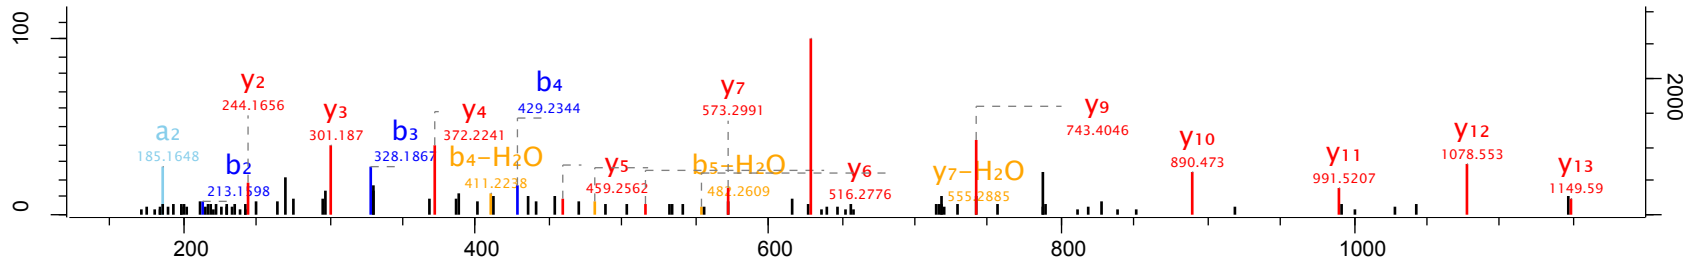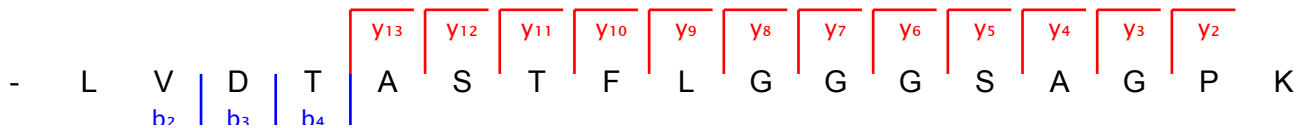

| Raw file                          | Scan  | Method   | Score | m/z    | Gene names |
|-----------------------------------|-------|----------|-------|--------|------------|
| 20140925_fract8_dyn_5ul_B8_01_443 | 23826 | TOF; CID | 45.42 | 798.38 | ATXN7L2    |

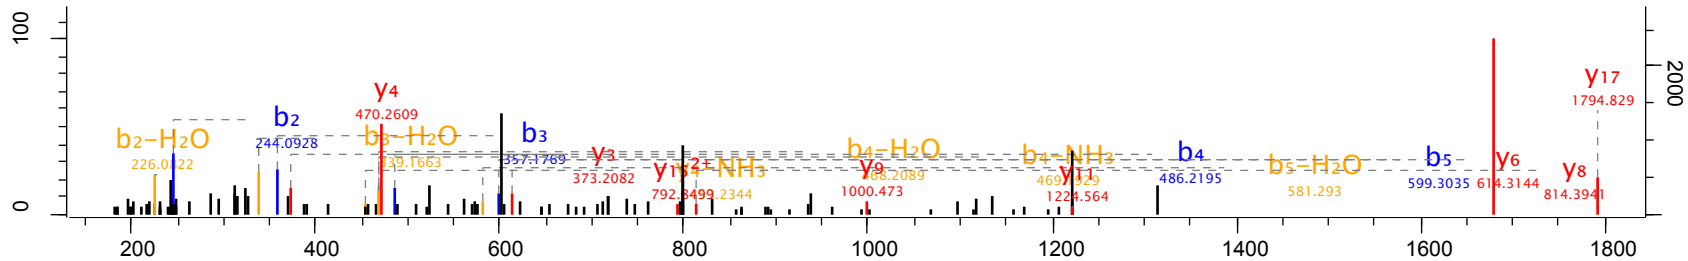

- E N I E I I P S E G S S H W A E G S P P E  
   b<sub>2</sub> b<sub>3</sub> b<sub>4</sub> b<sub>5</sub> y<sub>17</sub> y<sub>16</sub> y<sub>15</sub><sup>2+</sup> y<sub>11</sub> y<sub>9</sub> y<sub>8</sub> y<sub>6</sub> y<sub>4</sub> y<sub>3</sub>

Raw file

20140925\_fract8\_dyn\_5ul\_B8\_01\_443

Scan

24478

Method

TOF; CID

Score

75.82

m/z

658.85

Gene names

PLAC1

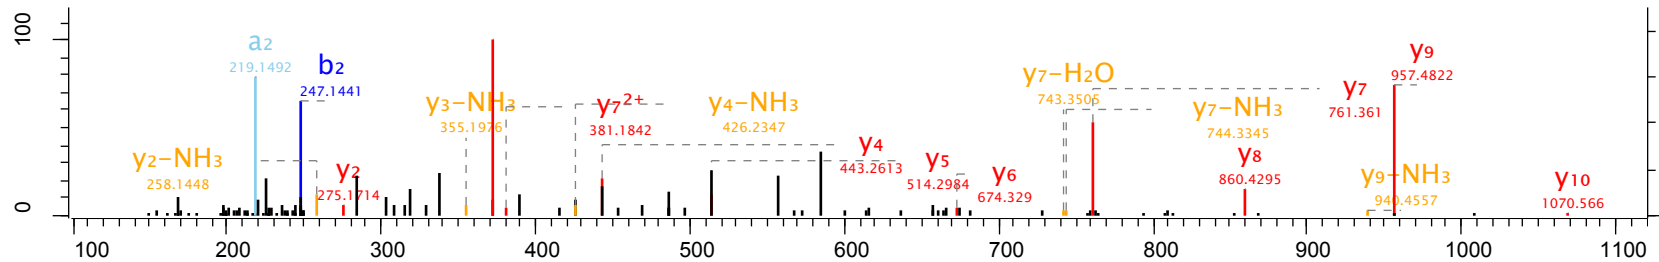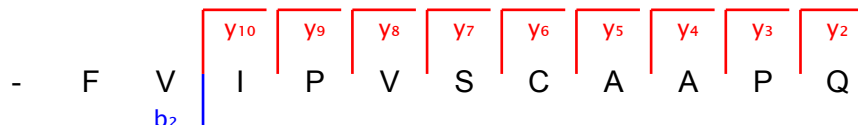



Raw file

20140925\_fract8\_dyn\_5ul\_B8\_01\_443

Scan

25227

Method

TOF; CID

Score

51.59

m/z

578.98

Gene names

DCLRE1B

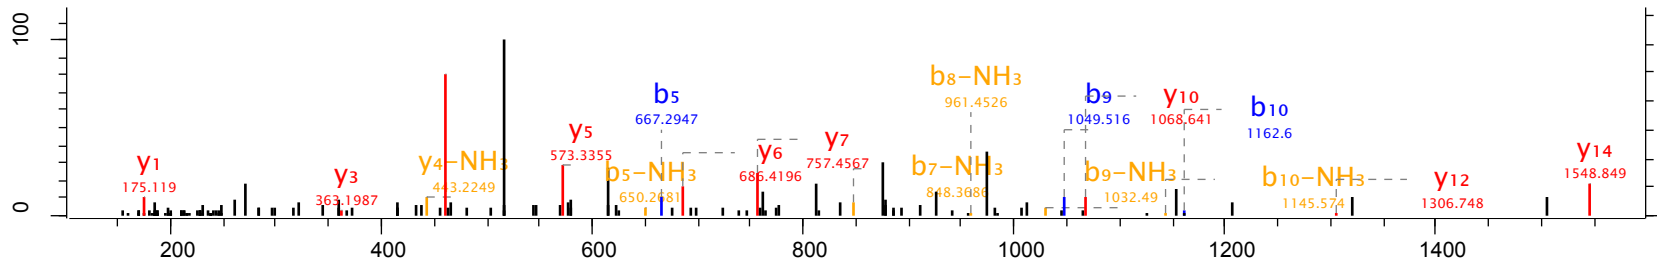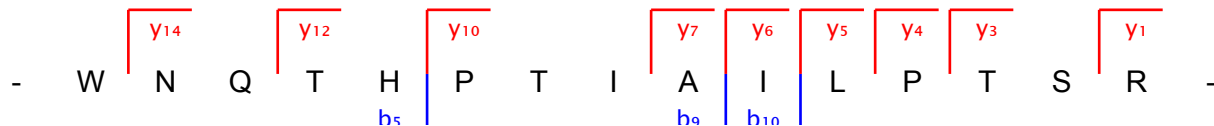

Raw file

20140925\_fract8\_dyn\_5ul\_B8\_01\_443

Scan

28629

Method

TOF; CID

Score

110.57

m/z

1173.06

Gene names

PKIG

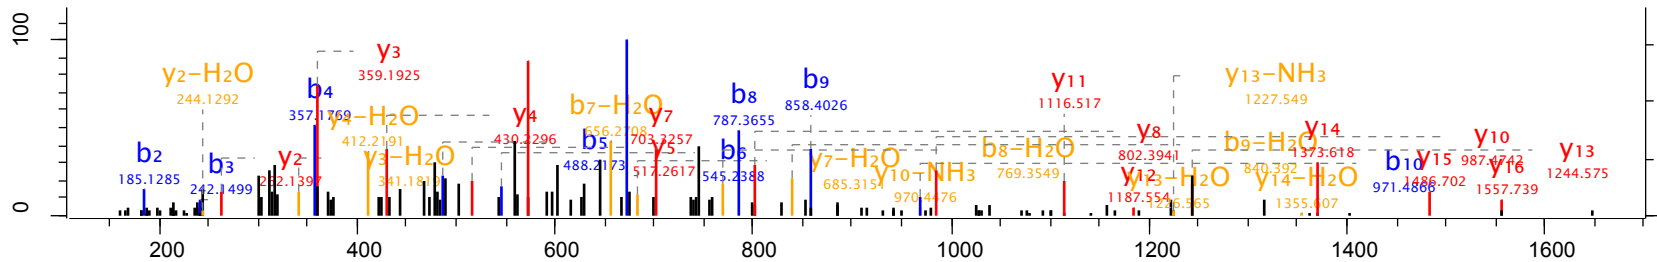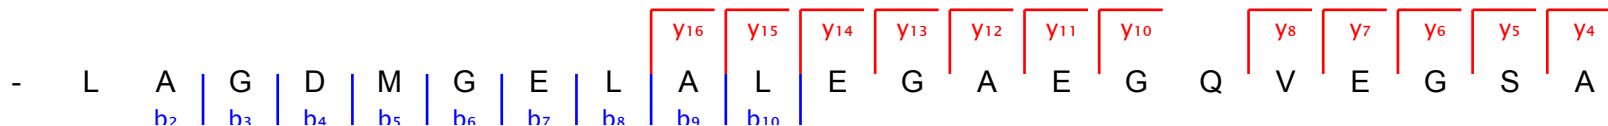

Raw file

20140925\_fract8\_dyn\_5ul\_B8\_01\_443

Scan

30412

Method

TOF; CID

Score

64.27

m/z

869.43

Gene names

MFSD8

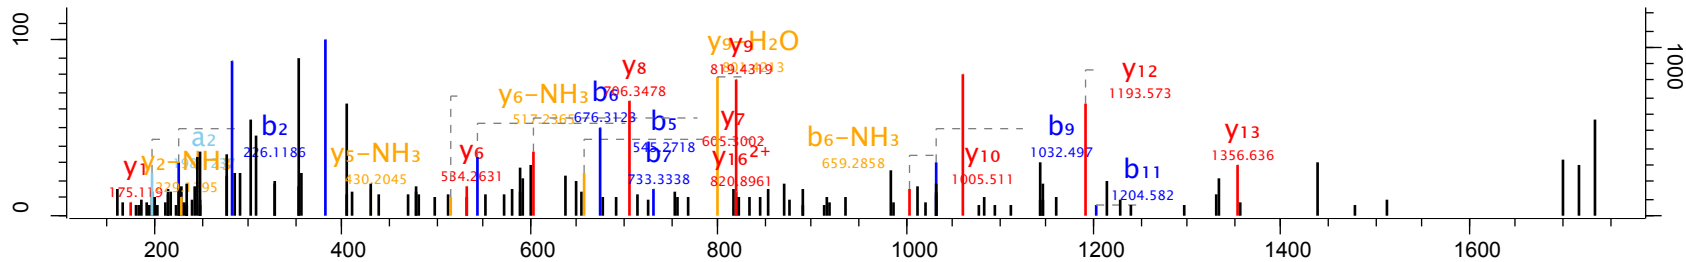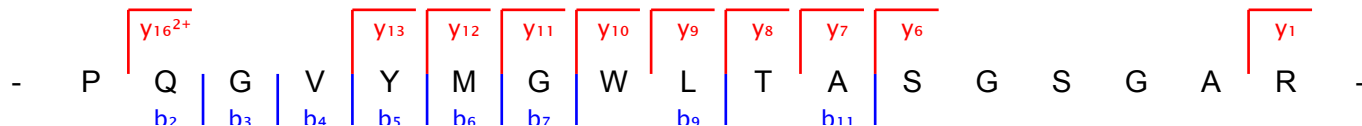

| Raw file                          | Scan  | Method   | Score  | m/z    | Gene names      |
|-----------------------------------|-------|----------|--------|--------|-----------------|
| 20140925_fract8_dyn_5ul_B8_01_443 | 32575 | TOF; CID | 103.31 | 606.37 | FAAP24;C19orf40 |

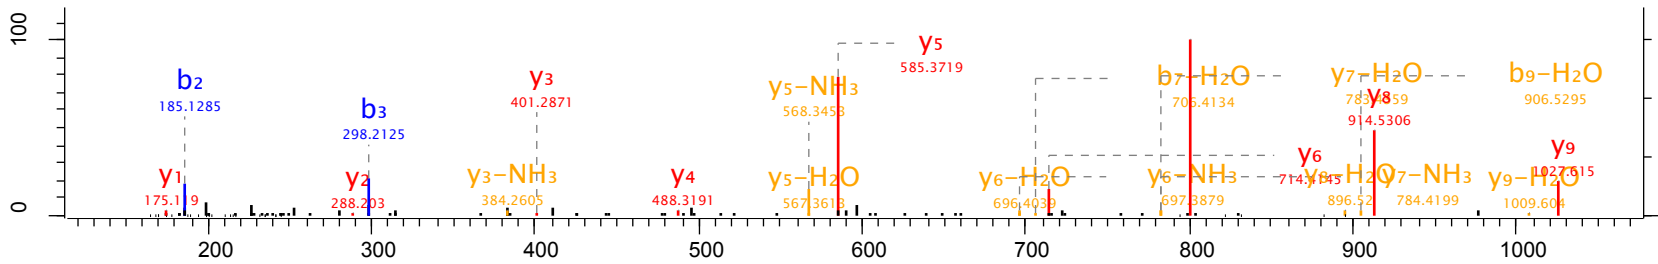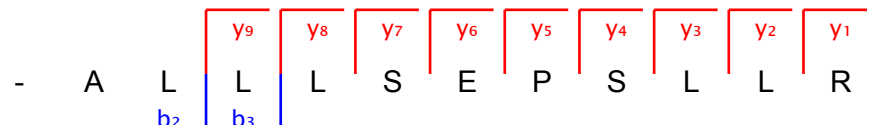

[1e4]

| Raw file                          | Scan | Method   | Score | m/z    | Gene names |
|-----------------------------------|------|----------|-------|--------|------------|
| 20140925_fract9_dyn_5ul_C1_01_444 | 3856 | TOF; CID | 59.23 | 453.58 | SPOCK1     |

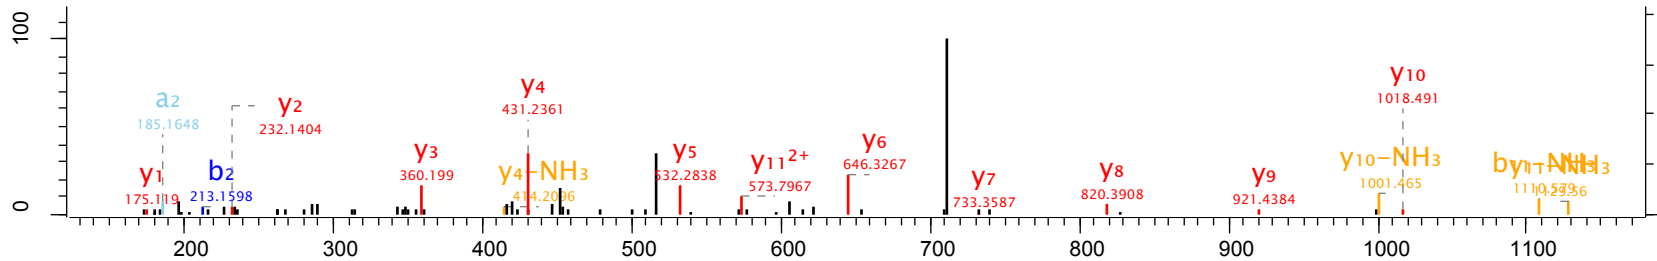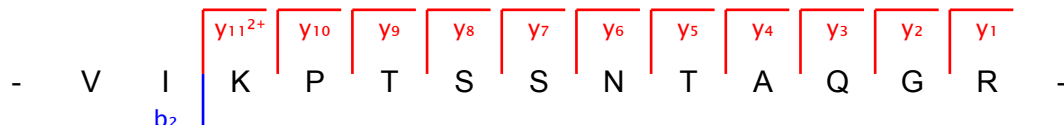

| Raw file                          | Scan | Method   | Score  | m/z    | Gene names |
|-----------------------------------|------|----------|--------|--------|------------|
| 20140925_fract9_dyn_5ul_C1_01_444 | 6056 | TOF; CID | 114.28 | 443.23 | MRPS18C    |

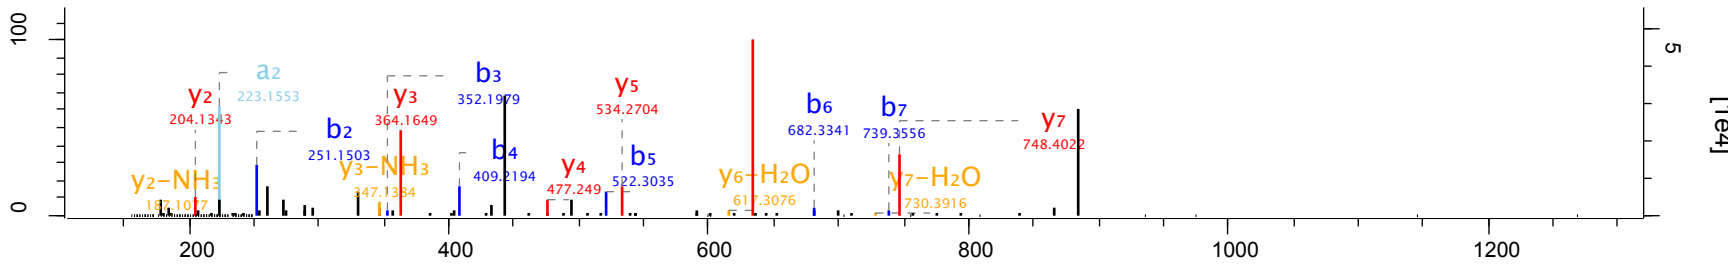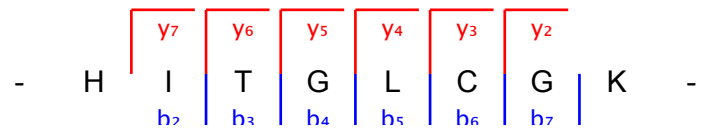

| Raw file                          | Scan | Method   | Score | m/z    | Gene names |
|-----------------------------------|------|----------|-------|--------|------------|
| 20140925_fract9_dyn_5ul_C1_01_444 | 7437 | TOF; CID | 80.69 | 472.77 | ZNF236     |

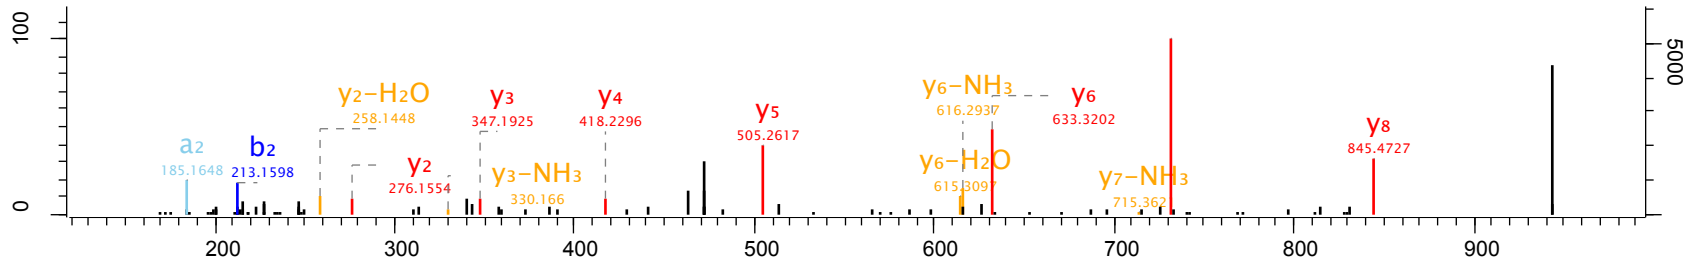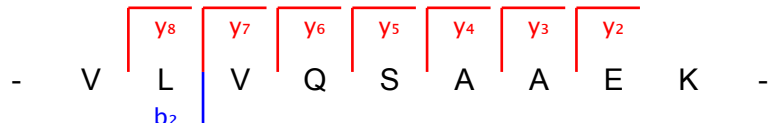

Raw file

20140925\_fract9\_dyn\_5ul\_C1\_01\_444

Scan

11579

Method

TOF; CID

Score

108.47

m/z

438.18

Gene names

CITED2

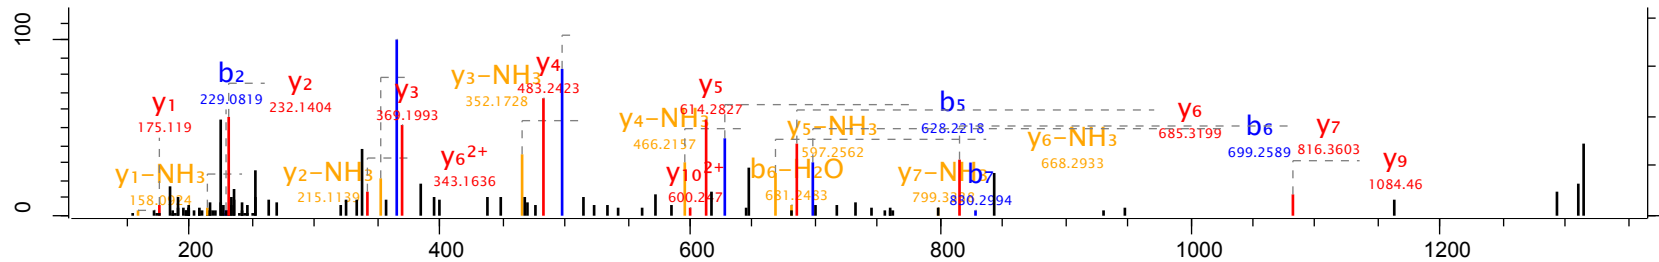

ac

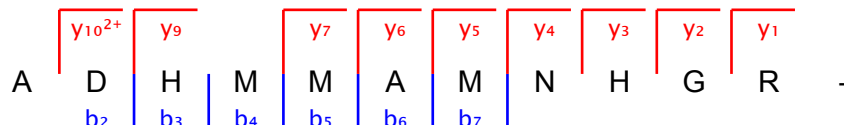



Raw file

20140925\_fract9\_dyn\_5ul\_C1\_01\_444

Scan

17719

Method

TOF; CID

Score

72.29

m/z

627.3

Gene names

TTC31

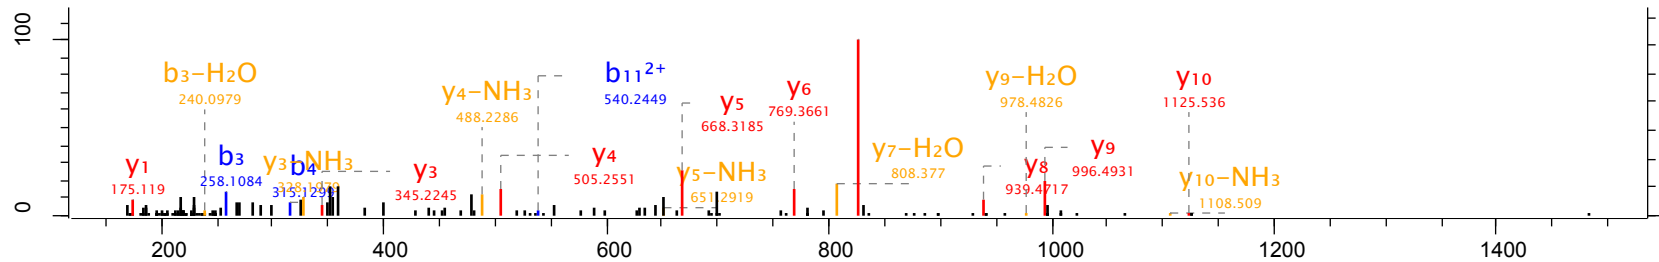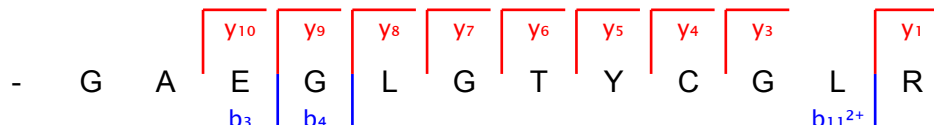

| Raw file                          | Scan  | Method   | Score | m/z    | Gene names |
|-----------------------------------|-------|----------|-------|--------|------------|
| 20140925_fract9_dyn_5ul_C1_01_444 | 24095 | TOF; CID | 81.35 | 889.45 | SERINC1    |

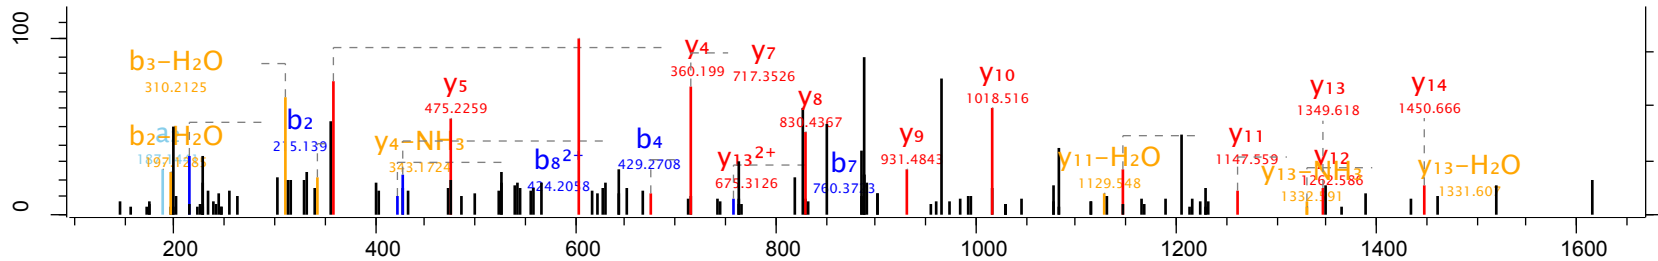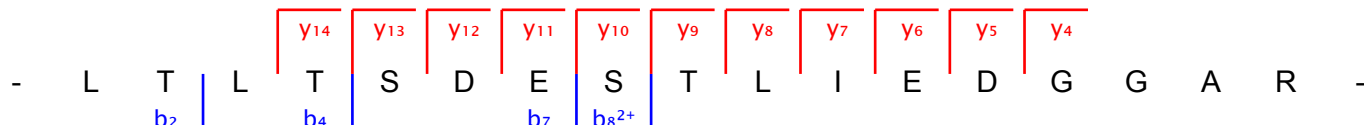

| Raw file                          | Scan  | Method   | Score | m/z    | Gene names |
|-----------------------------------|-------|----------|-------|--------|------------|
| 20140925_fract9_dyn_5ul_C1_01_444 | 24322 | TOF; CID | 82.51 | 958.16 | OTUD1      |

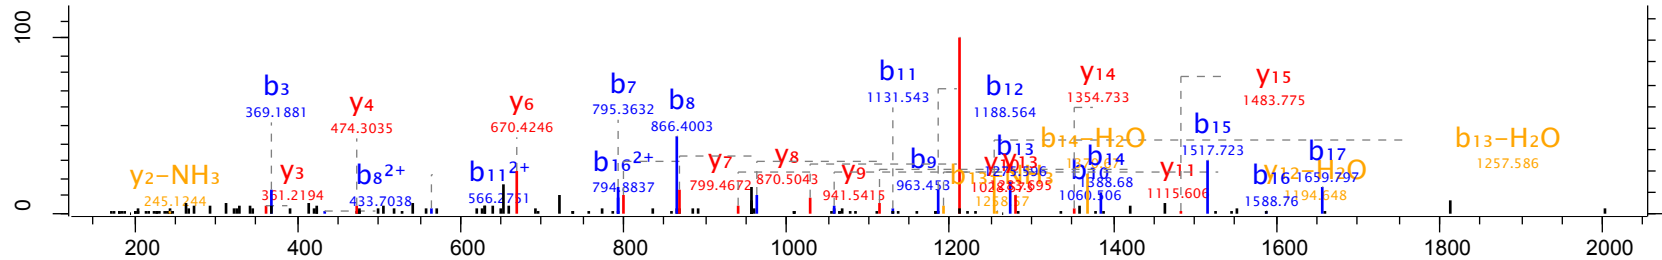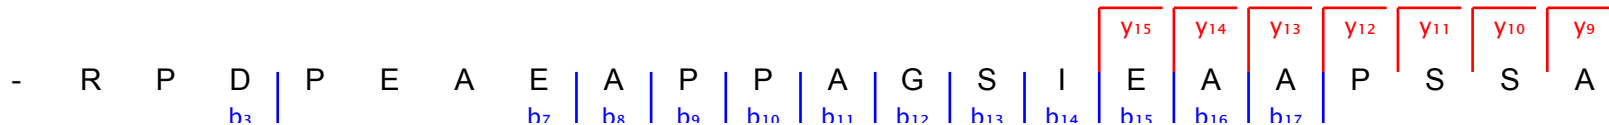

| Raw file                          | Scan  | Method   | Score  | m/z    | Gene names |
|-----------------------------------|-------|----------|--------|--------|------------|
| 20140925_fract9_dyn_5ul_C1_01_444 | 25436 | TOF; CID | 102.07 | 502.27 | PGM5       |

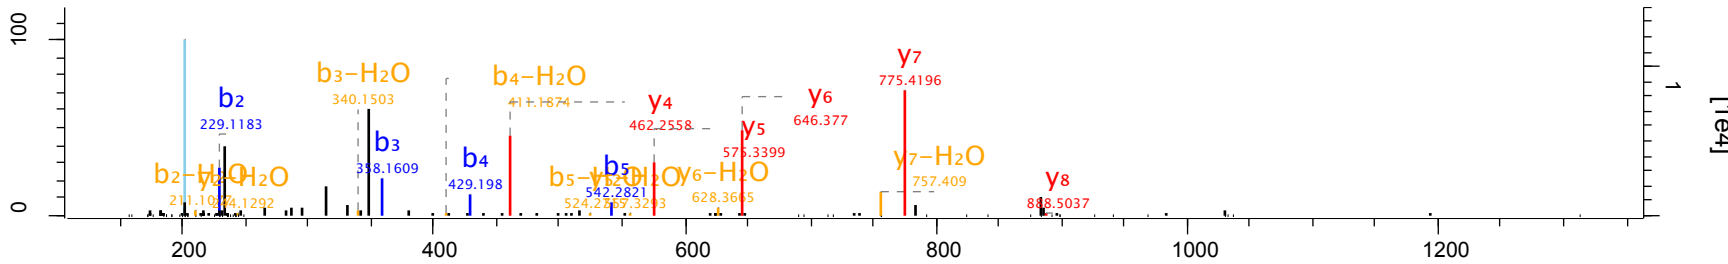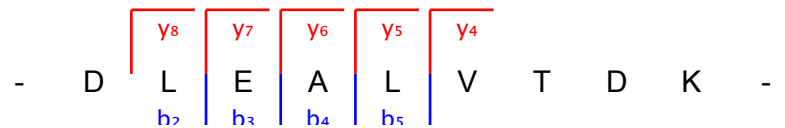

Raw file

20140925\_fract9\_dyn\_5ul\_C1\_01\_444

Scan

25470

Method

TOF; CID

Score

65.37

m/z

749.36

Gene names

MT-ND6

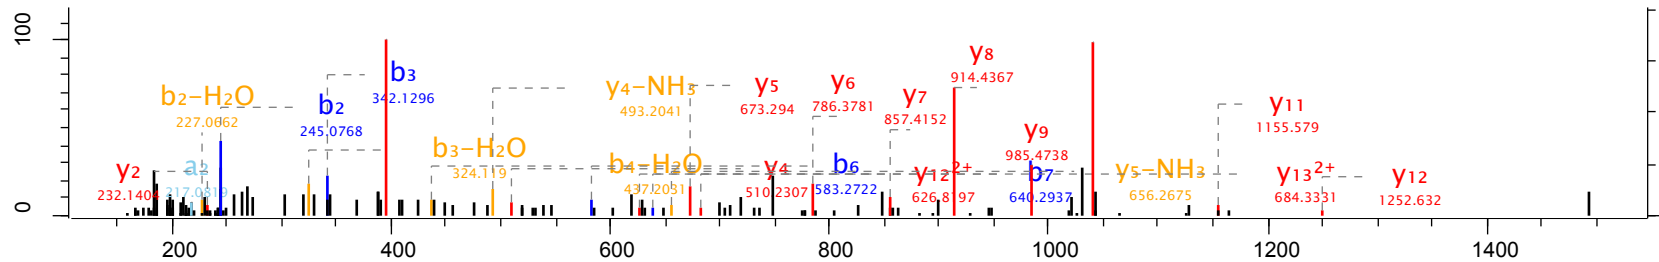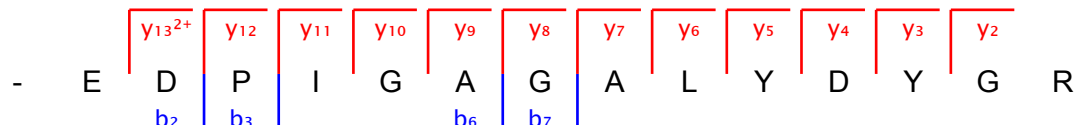

Raw file

Scan

Method

Score

m/z

Gene names

20140925\_fract9\_dyn\_5ul\_C1\_01\_444

27368

TOF; CID

86.37

901.45

C21orf2

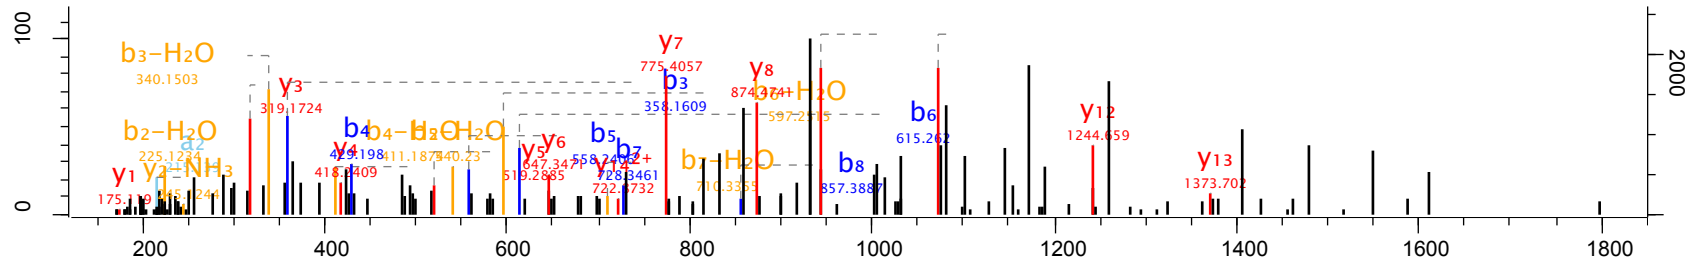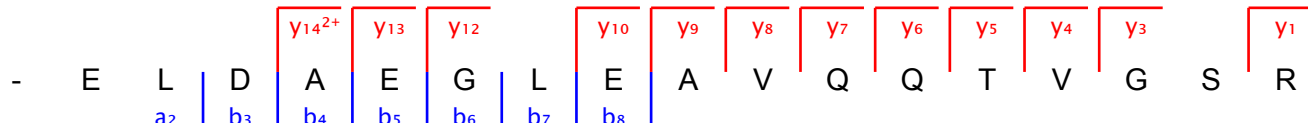

| Raw file                          | Scan  | Method   | Score | m/z     | Gene names |
|-----------------------------------|-------|----------|-------|---------|------------|
| 20140925_fract9_dyn_5ul_C1_01_444 | 29165 | TOF; CID | 87.36 | 1207.54 | CMTM4      |

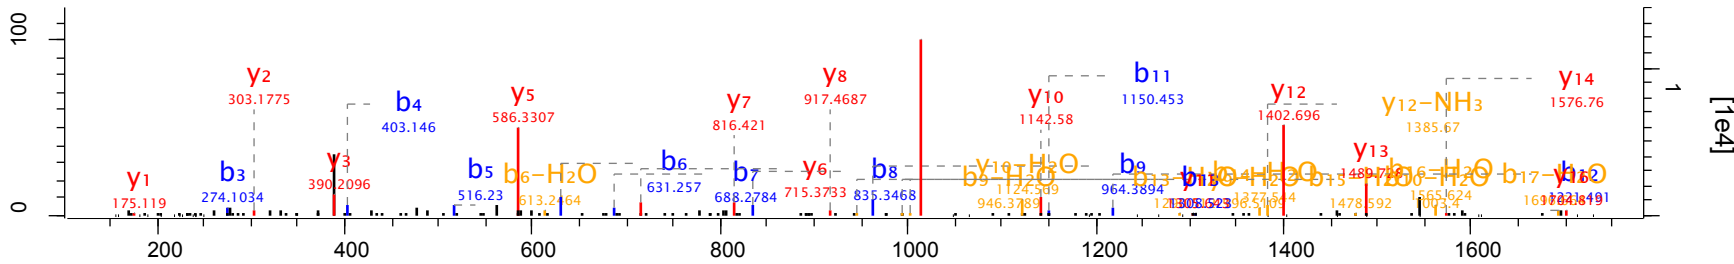

- S G E E L D G F E G E A S S T S M I S G A

b<sub>3</sub>
b<sub>4</sub>
b<sub>5</sub>
b<sub>6</sub>
b<sub>7</sub>
b<sub>8</sub>
b<sub>9</sub>
b<sub>11</sub>
b<sub>12</sub>
b<sub>13</sub>

| Raw file                          | Scan  | Method   | Score  | m/z    | Gene names |
|-----------------------------------|-------|----------|--------|--------|------------|
| 20140925_fract9_dyn_5ul_C1_01_444 | 30623 | TOF; CID | 102.59 | 765.36 | CNIH4      |

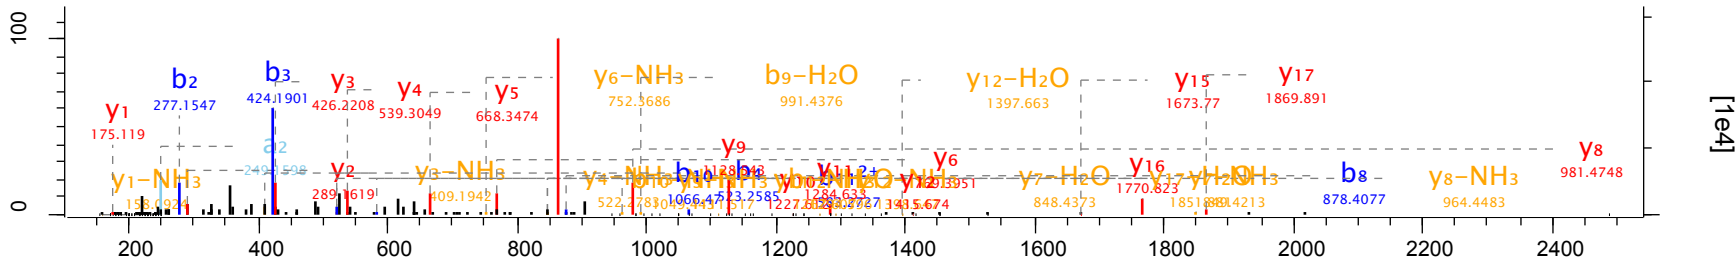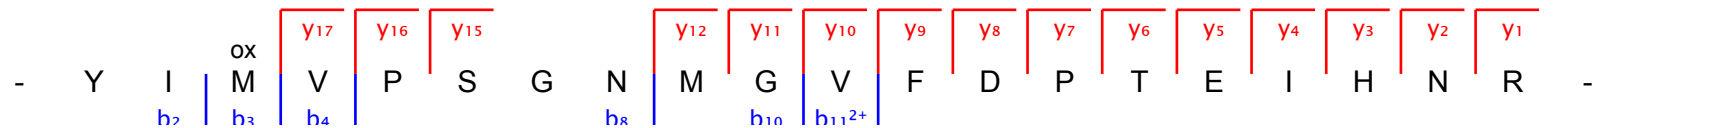



Raw file

20140925\_fract9\_dyn\_5ul\_C1\_01\_444

Scan

30647

Method

TOF; CID

Score

57.48

m/z

638.32

Gene names

G2E3

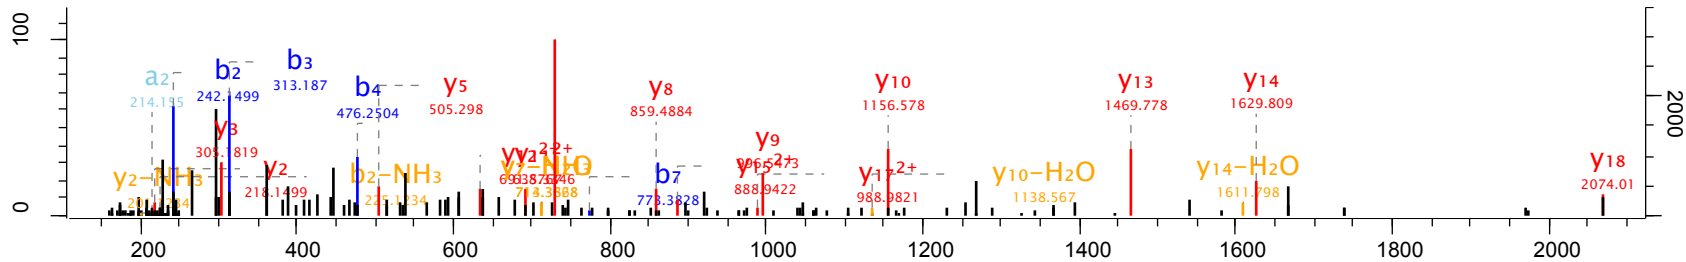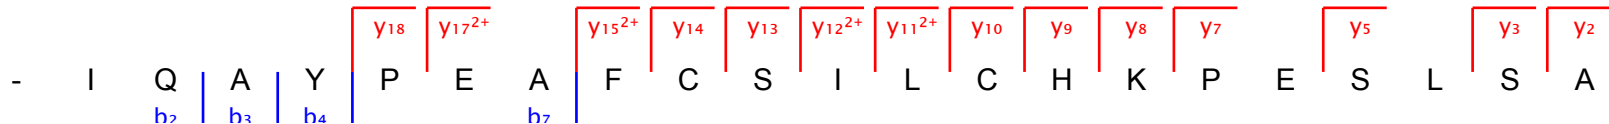

| Raw file                          | Scan  | Method   | Score | m/z    | Gene names |
|-----------------------------------|-------|----------|-------|--------|------------|
| 20140925_fract9_dyn_5ul_C1_01_444 | 33274 | TOF; CID | 77.75 | 922.45 | HYAL2      |

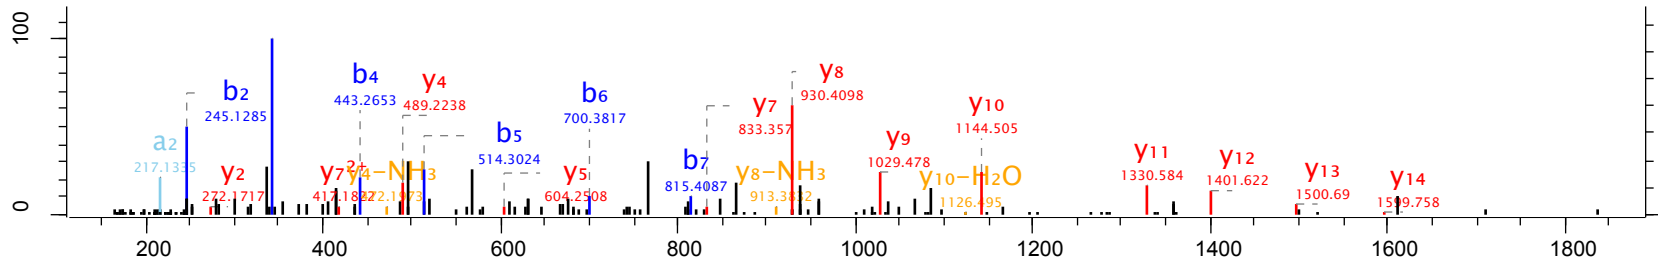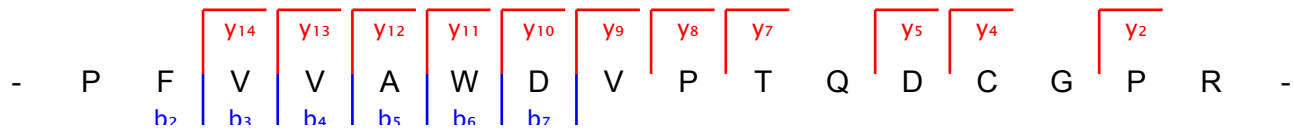

Raw file

20140925\_fract9\_dyn\_5ul\_C1\_01\_444

Scan

36826

Method

TOF; CID

Score

128.06

m/z

835.4

Gene names

IL32

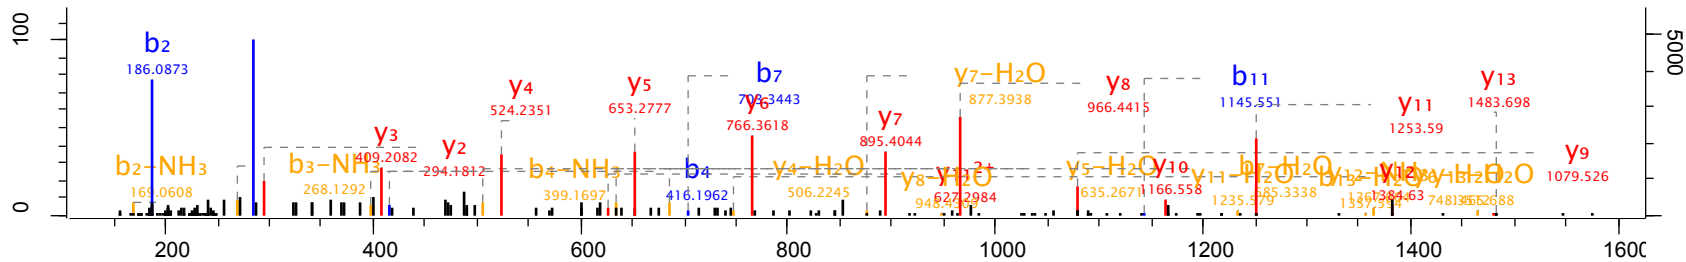

- G Q V M S S L A E L E D D F K -  
 b<sub>2</sub> b<sub>3</sub> b<sub>4</sub> b<sub>7</sub> b<sub>11</sub>  
 y<sub>13</sub> y<sub>12</sub> y<sub>11</sub> y<sub>10</sub> y<sub>9</sub> y<sub>8</sub> y<sub>7</sub> y<sub>6</sub> y<sub>5</sub> y<sub>4</sub> y<sub>3</sub> y<sub>2</sub>

| Raw file                          | Scan  | Method   | Score  | m/z     | Gene names |
|-----------------------------------|-------|----------|--------|---------|------------|
| 20140925_fract9_dyn_5ul_C1_01_444 | 37645 | TOF; CID | 104.88 | 1065.55 | KDELRL1    |

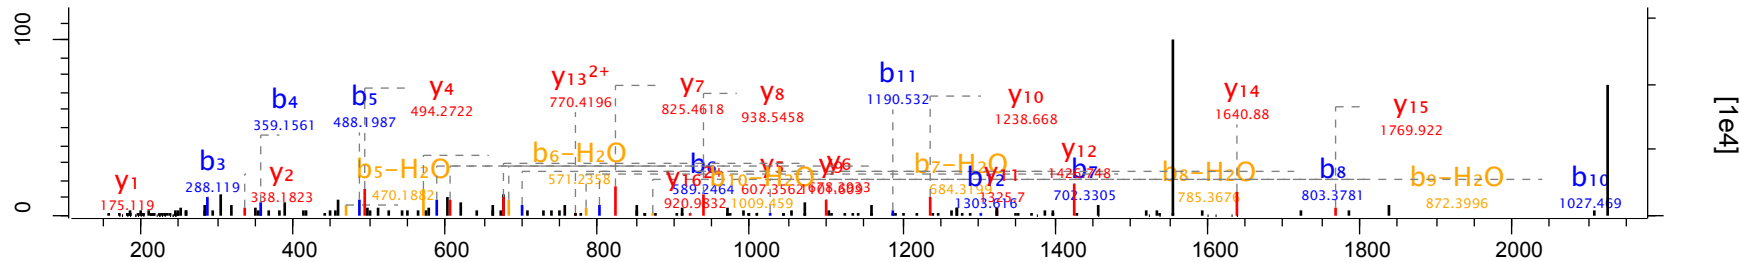

- T G E A E T I T S H Y L F A L G V Y R -

Fragmentation mapping (b and y ions) is shown below the sequence:

- Red brackets above the sequence indicate y-ion fragments: y16<sup>2+</sup>, y15, y14, y13<sup>2+</sup>, y12, y11, y10, y9, y8, y7, y6, y5, y4, y2, y1.
- Blue brackets below the sequence indicate b-ion fragments: b3, b4, b5, b6, b7, b8, b10, b11, b12.

| Raw file                          | Scan  | Method   | Score | m/z     | Gene names |
|-----------------------------------|-------|----------|-------|---------|------------|
| 20140925_fract9_dyn_5ul_C1_01_444 | 37770 | TOF; CID | 79.84 | 1017.54 | ZFAND2B    |

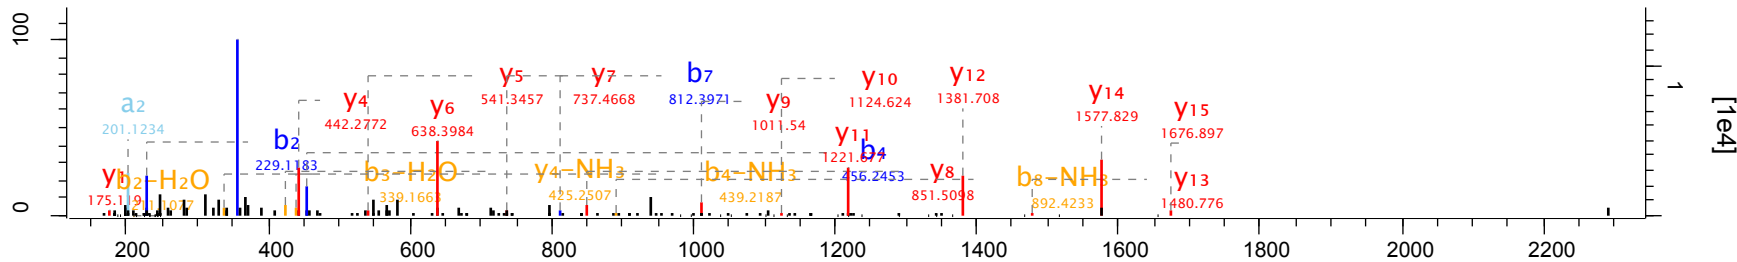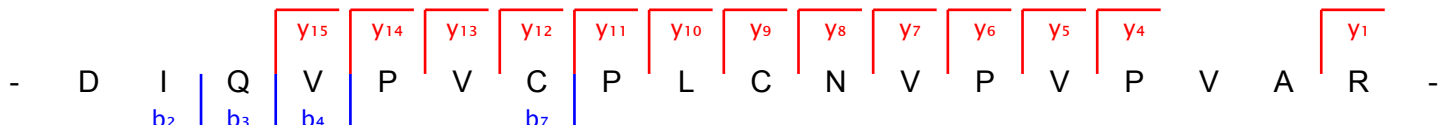

Raw file

20140925\_fract9\_dyn\_5ul\_C1\_01\_444

Scan

37924

Method

TOF; CID

Score

61.94

m/z

1018.48

Gene names

SCHIP1;IQGJ-SCHIP1

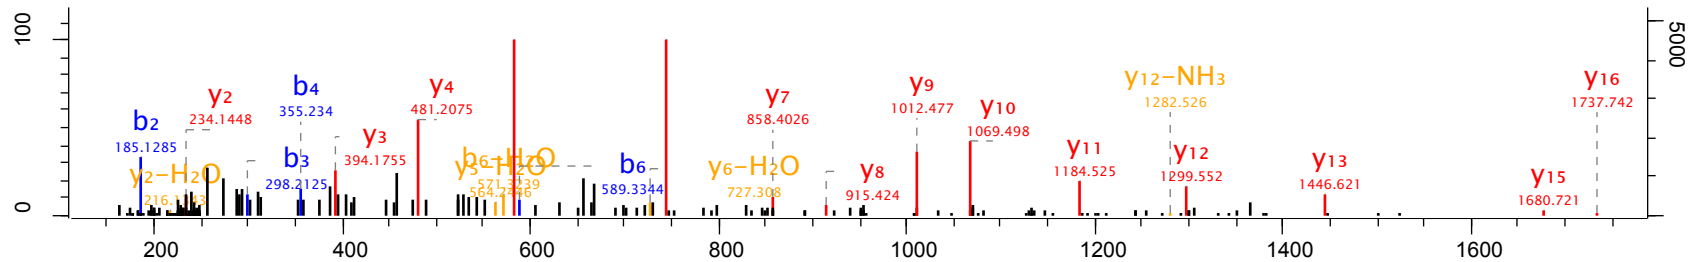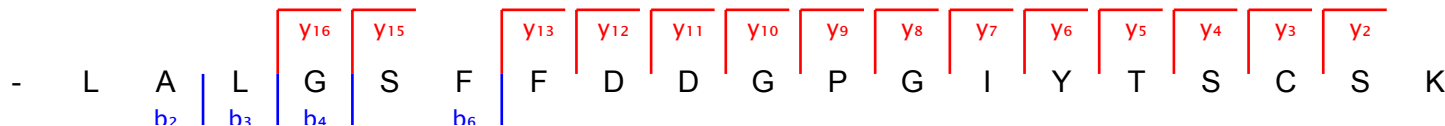

| Raw file                          | Scan  | Method   | Score | m/z    | Gene names |
|-----------------------------------|-------|----------|-------|--------|------------|
| 20140925_fract9_dyn_5ul_C1_01_444 | 38245 | TOF; CID | 49.83 | 969.45 | CDC42SE1   |

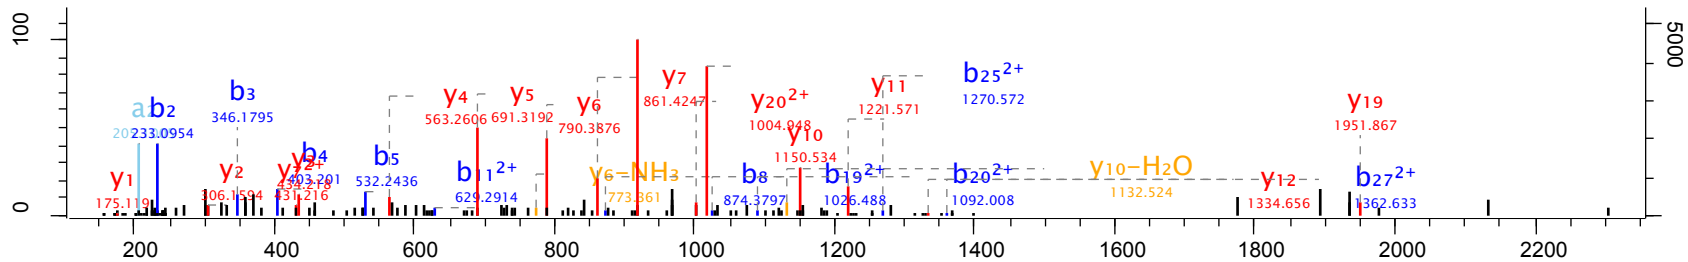

- T M I G E P M N F V H L T H I G S G E M G

$b_2$  |  $b_3$  |  $b_4$  |  $b_5$  |  $b_8$  |  $b_{11}^{2+}$  |  $b_{19}^{2+}$  |  $b_{20}^{2+}$

$y_{20}^{2+}$  |  $y_{19}$

| Raw file                          | Scan  | Method   | Score | m/z    | Gene names |
|-----------------------------------|-------|----------|-------|--------|------------|
| 20140925_fract9_dyn_5ul_C1_01_444 | 40227 | TOF; CID | 86.21 | 522.28 | PXDNL      |

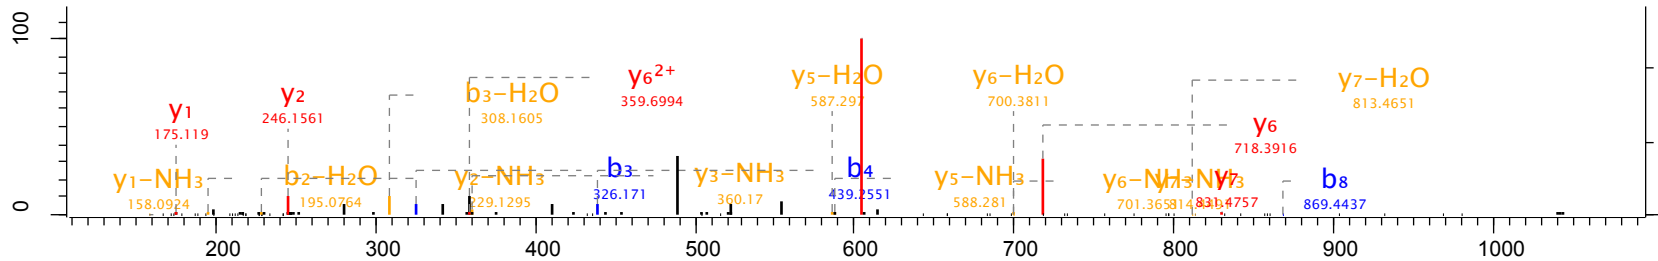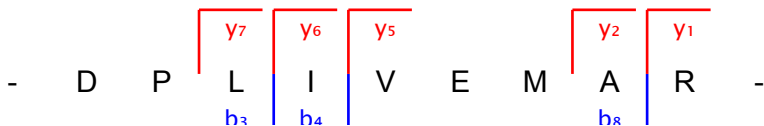

[1e4]



Raw file

20140925\_fract10\_dyn\_5ul\_C2\_01\_445

Scan

5310

Method

TOF; CID

Score

65.37

m/z

465.23

Gene names

CRAT

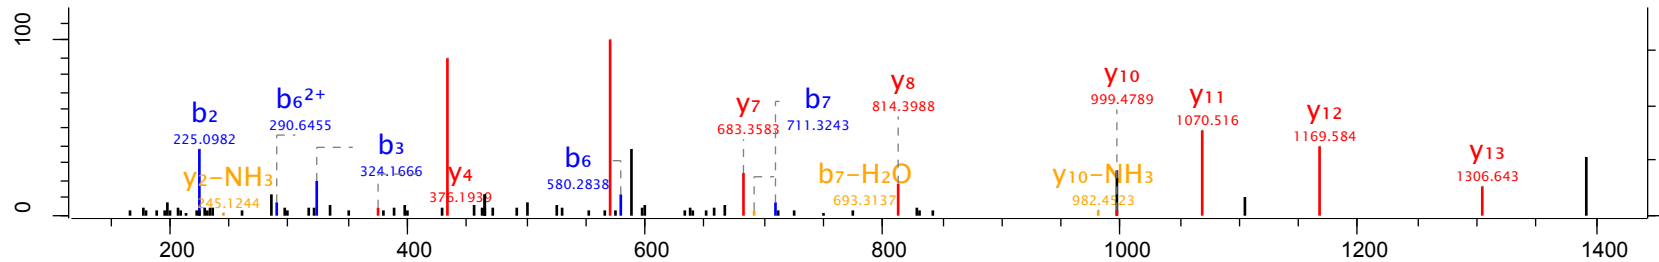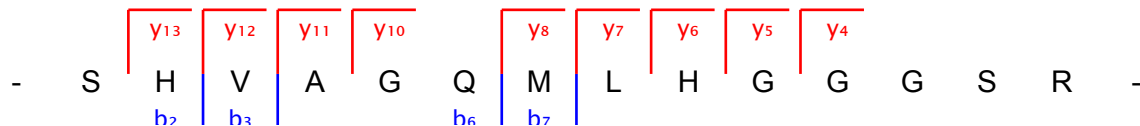

Raw file

Scan

Method

Score

m/z

Gene names

20140925\_fract10\_dyn\_5ul\_C2\_01\_445

6793

TOF; CID

196.27

446.23

NINJ1

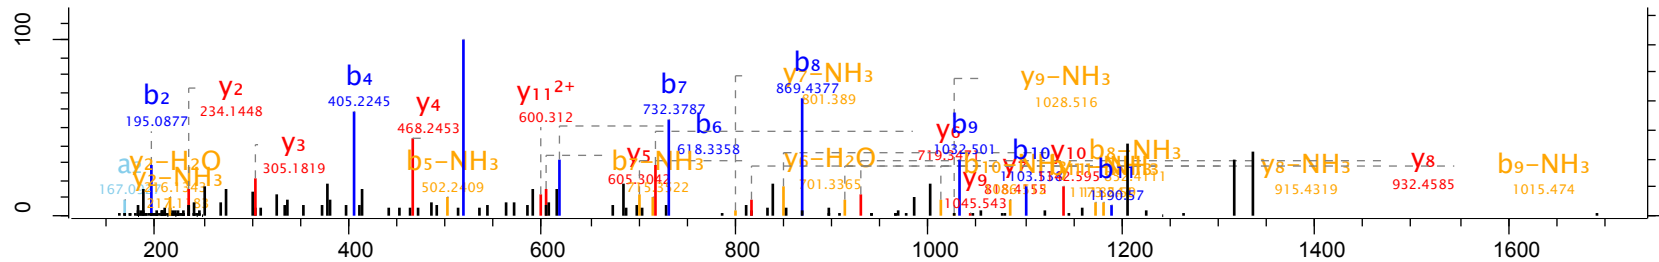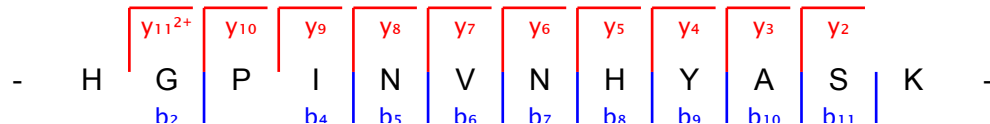

Raw file

20140925\_fract10\_dyn\_5ul\_C2\_01\_445

Scan

7750

Method

TOF; CID

Score

47.77

m/z

501.26

Gene names

PRRG4

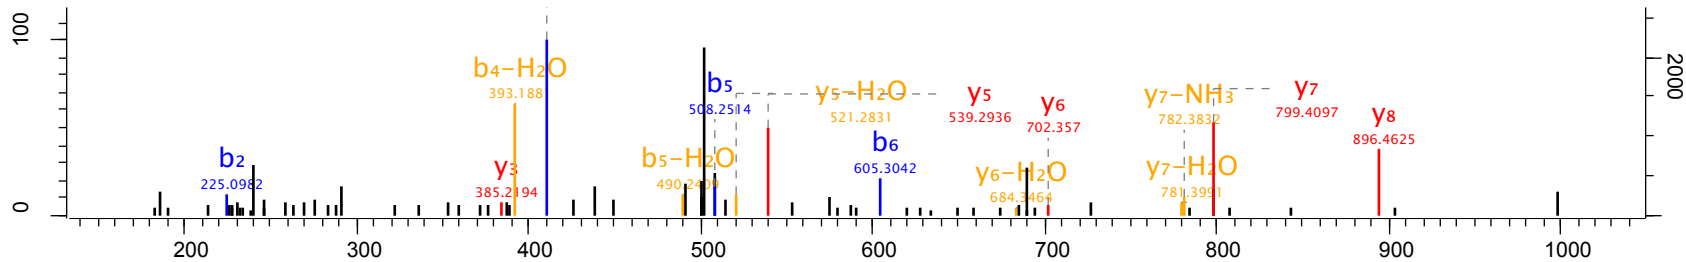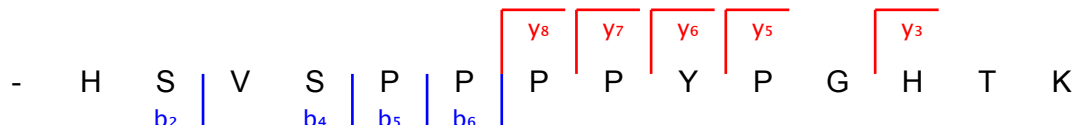

| Raw file                           | Scan  | Method   | Score | m/z    | Gene names |
|------------------------------------|-------|----------|-------|--------|------------|
| 20140925_fract10_dyn_5ul_C2_01_445 | 12153 | TOF; CID | 93.6  | 529.32 | RPGRIP1    |

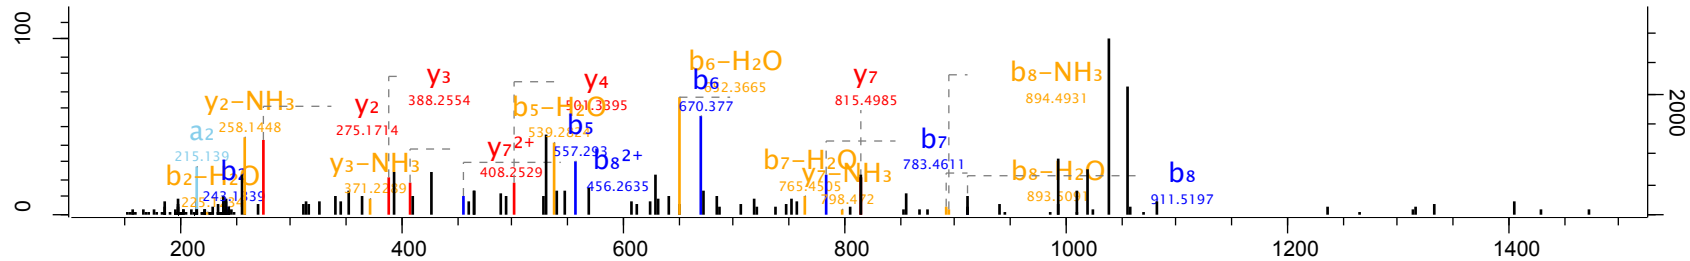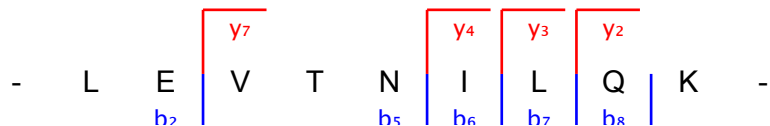

Raw file

20140925\_fract10\_dyn\_5ul\_C2\_01\_445

Scan

14434

Method

TOF; CID

Score

125.16

m/z

497.26

Gene names

AKR1D1

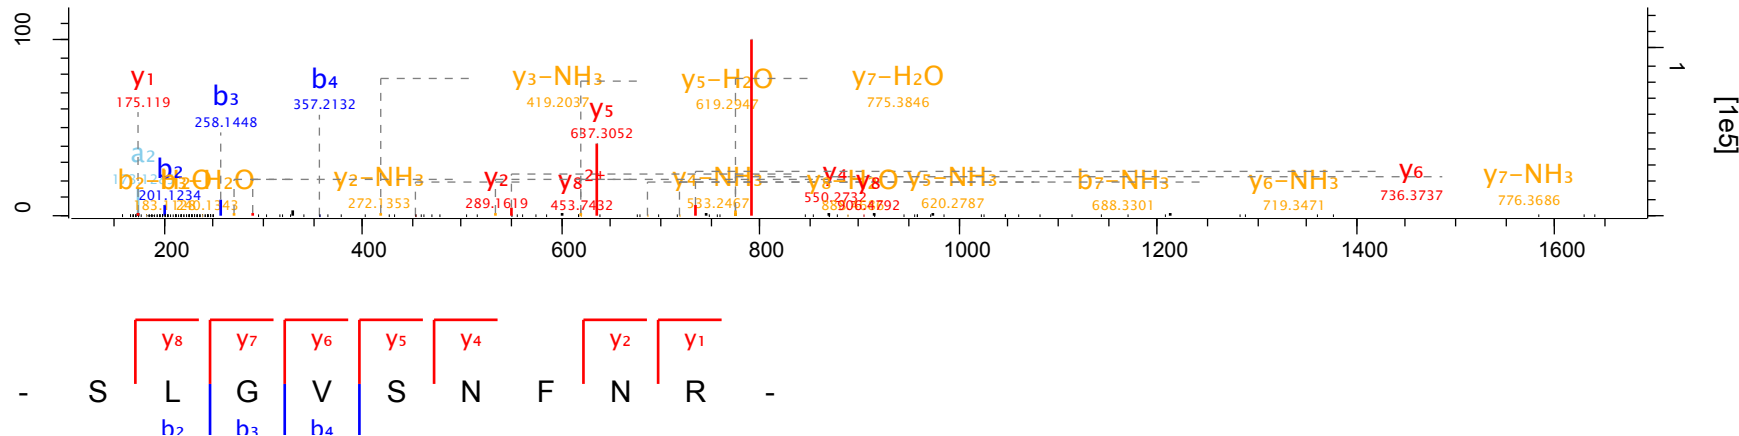

| Raw file                           | Scan  | Method   | Score | m/z    | Gene names |
|------------------------------------|-------|----------|-------|--------|------------|
| 20140925_fract10_dyn_5ul_C2_01_445 | 16455 | TOF; CID | 75.82 | 432.56 | NDUFC1     |

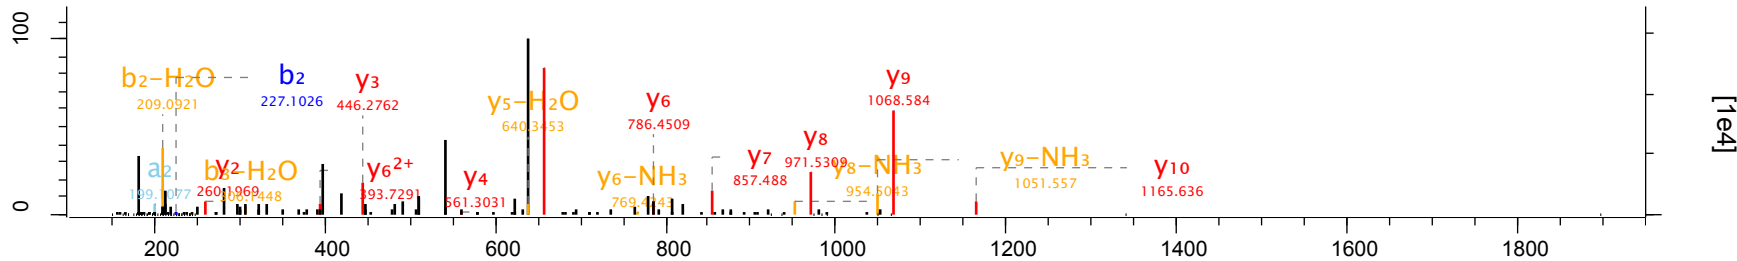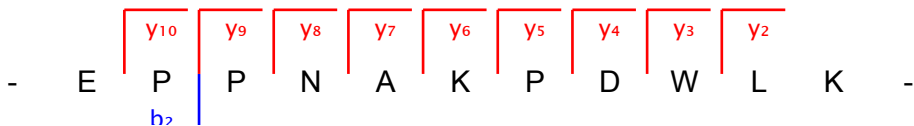

Raw file

20140925\_fract10\_dyn\_5ul\_C2\_01\_445

Scan

17301

Method

TOF; CID

Score

79.34

m/z

551.61

Gene names

YIPF6

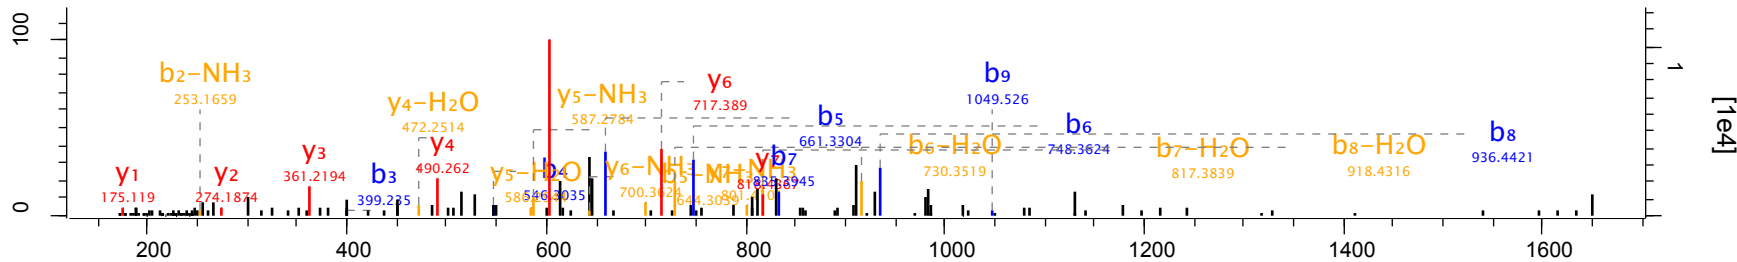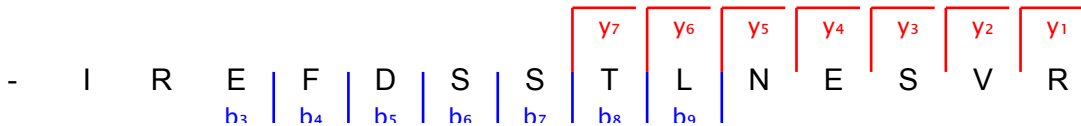

Raw file

20140925\_fract10\_dyn\_5ul\_C2\_01\_445

Scan

19493

Method

TOF; CID

Score

73.44

m/z

421.23

Gene names

GNG11

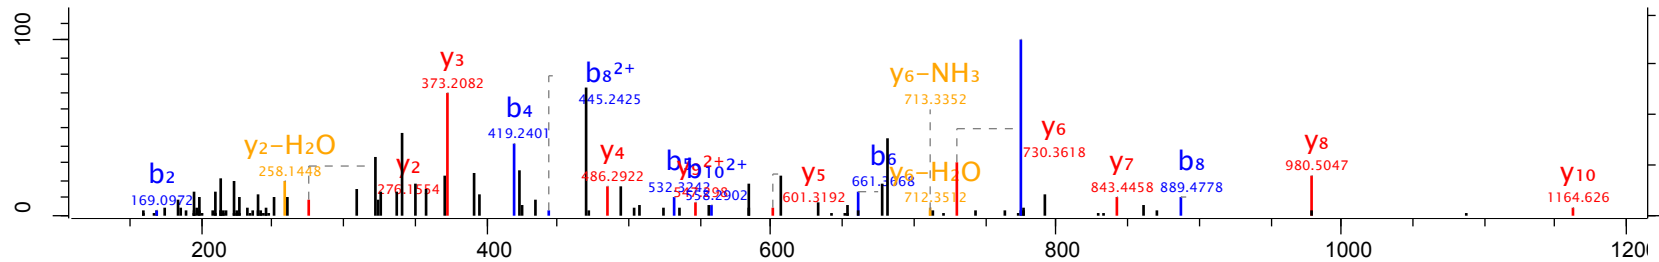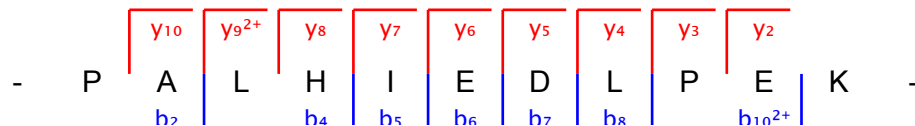



| Raw file                           | Scan  | Method   | Score | m/z    | Gene names |
|------------------------------------|-------|----------|-------|--------|------------|
| 20140925_fract10_dyn_5ul_C2_01_445 | 25602 | TOF; CID | 95.26 | 710.37 | TMEM184C   |

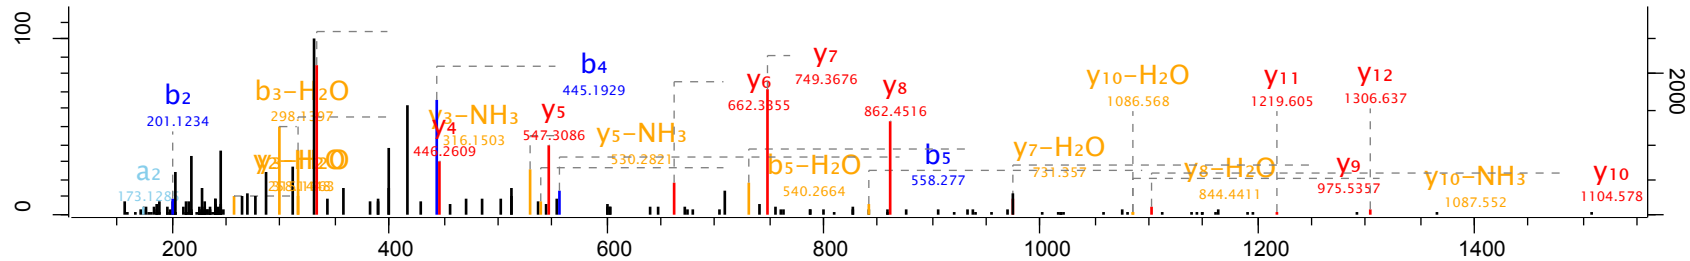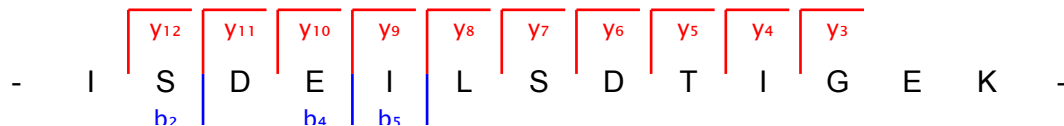

Raw file

Scan

Method

Score

m/z

Gene names

20140925\_fract10\_dyn\_5ul\_C2\_01\_445

28508

TOF; CID

84.61

550.28

GRPEL2

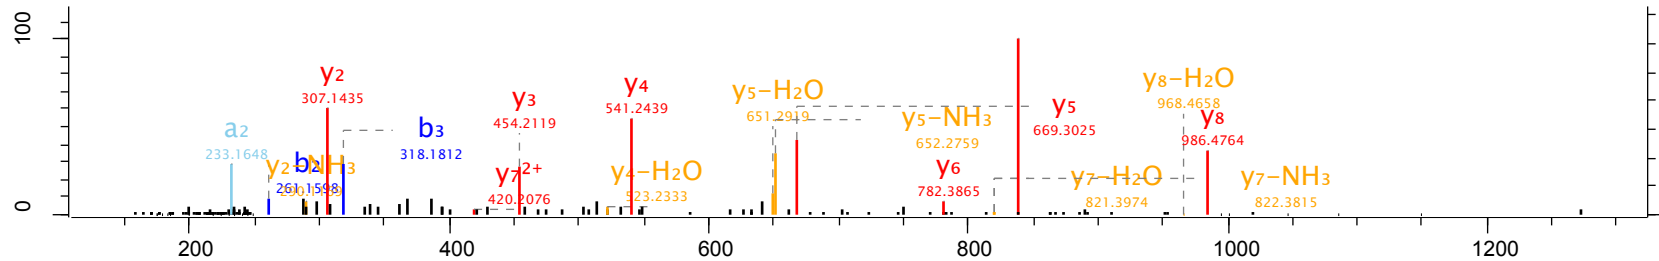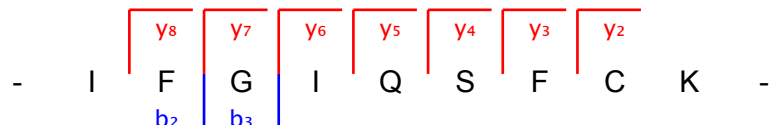

Raw file

Scan

Method

Score

m/z

Gene names

20140925\_fract10\_dyn\_5ul\_C2\_01\_445

29586

TOF; CID

98.06

865.99

KRTCAP2

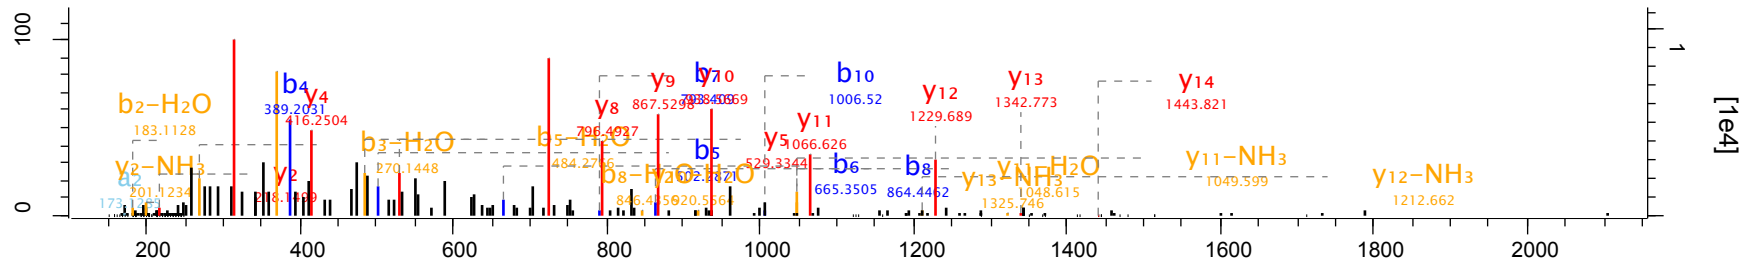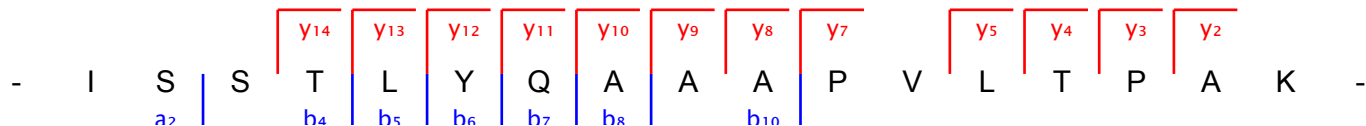

Raw file

Scan

Method

Score

m/z

Gene names

20140925\_fract10\_dyn\_5ul\_C2\_01\_445

33269

TOF; CID

147.62

629.83

GTF2A1;HIST1H4F

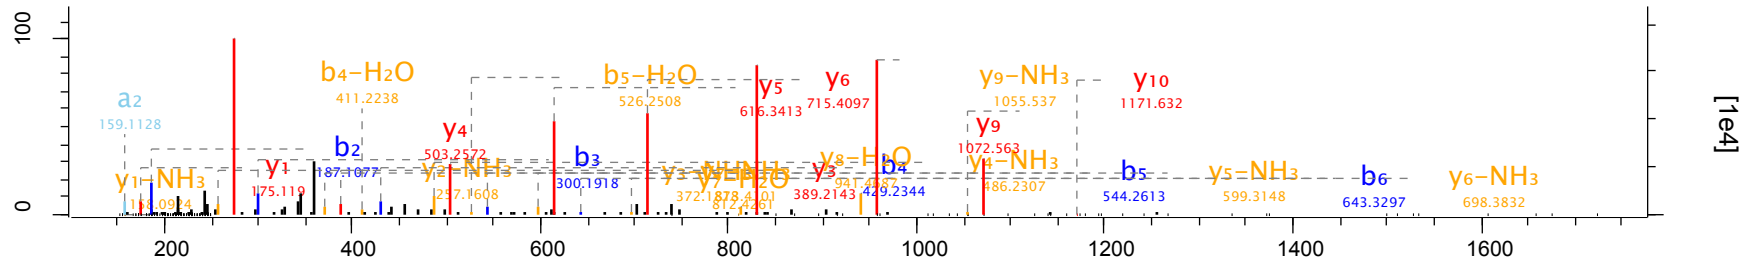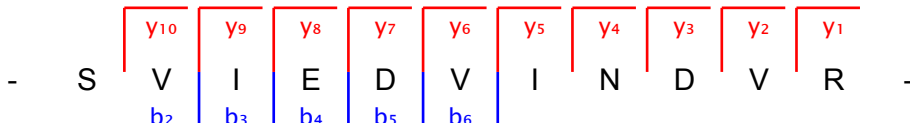

| Raw file                           | Scan  | Method   | Score  | m/z    | Gene names |
|------------------------------------|-------|----------|--------|--------|------------|
| 20140925_fract10_dyn_5ul_C2_01_445 | 33457 | TOF; CID | 128.06 | 814.92 | CCDC167    |

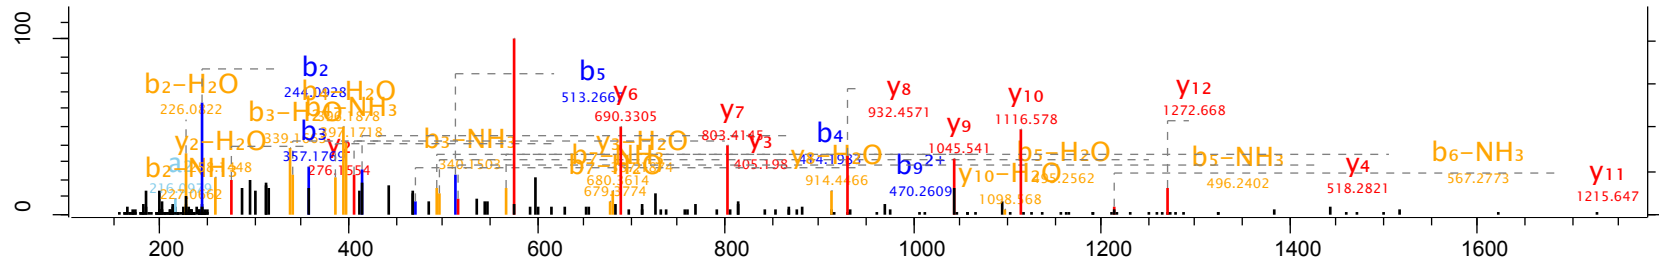

- E N L G V A L E I D G L E E K -

b<sub>2</sub> | b<sub>3</sub> | b<sub>4</sub> | b<sub>5</sub> | b<sub>9</sub><sup>2+</sup>

y<sub>12</sub> | y<sub>11</sub> | y<sub>10</sub> | y<sub>9</sub> | y<sub>8</sub> | y<sub>7</sub> | y<sub>6</sub> | y<sub>5</sub> | y<sub>4</sub> | y<sub>3</sub> | y<sub>2</sub>

Raw file

Scan

Method

Score

m/z

Gene names

20140925\_fract10\_dyn\_5ul\_C2\_01\_445

36125

TOF; CID

58.08

499.76

TRAM2

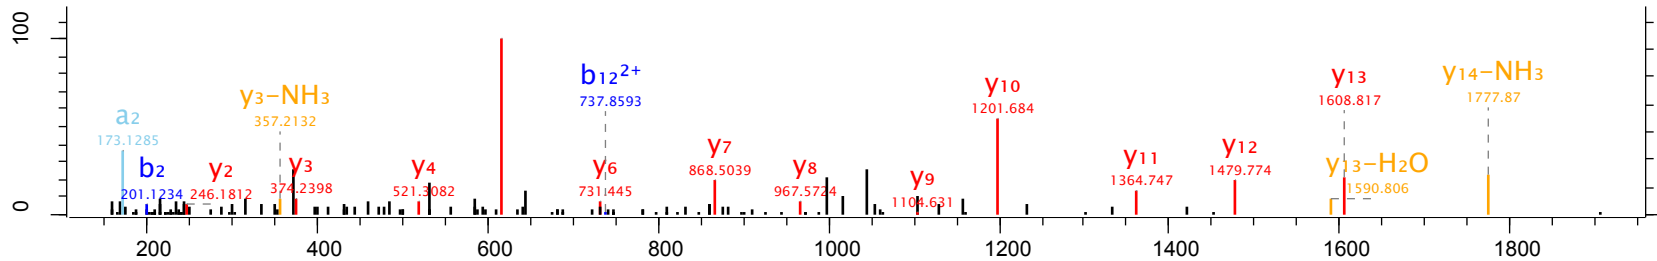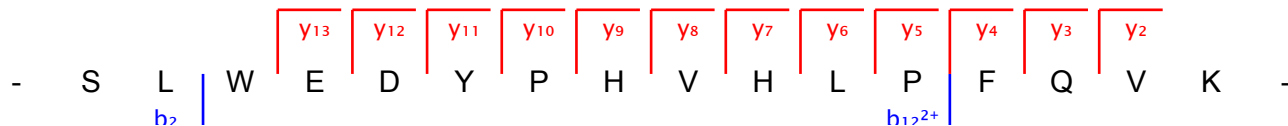

Raw file

20140925\_fract10\_dyn\_5ul\_C2\_01\_445

Scan

40949

Method

TOF; CID

Score

106.28

m/z

1099.53

Gene names

CNIH1

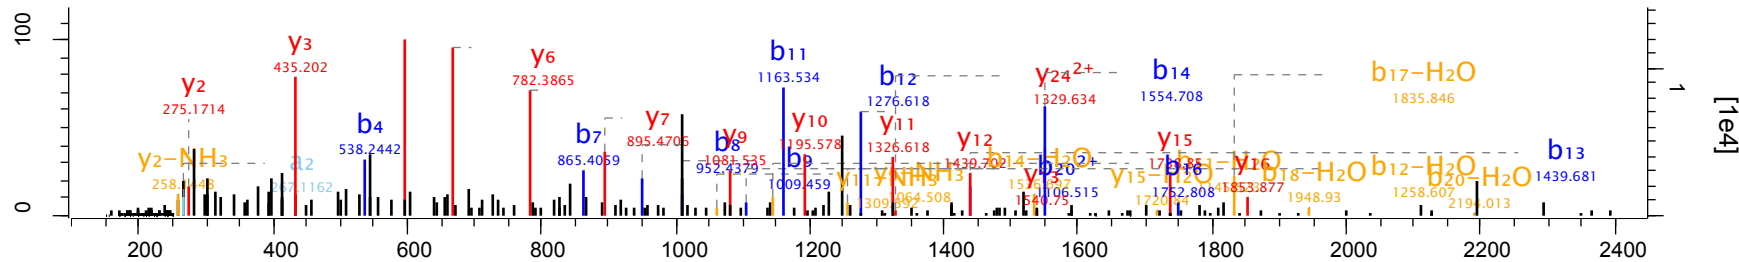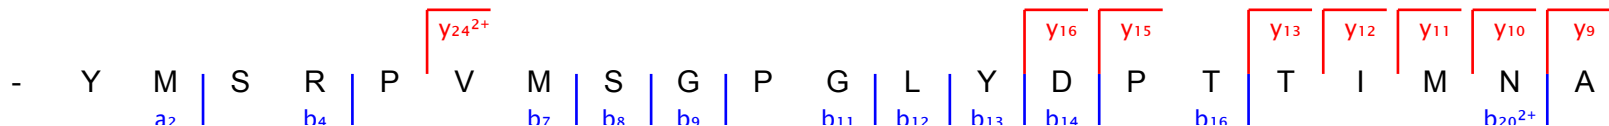

Raw file

20140925\_fract11\_dyn\_5ul\_C3\_01\_446

Scan

6238

Method

TOF; CID

Score

44.97

m/z

526.62

Gene names

ZNF251

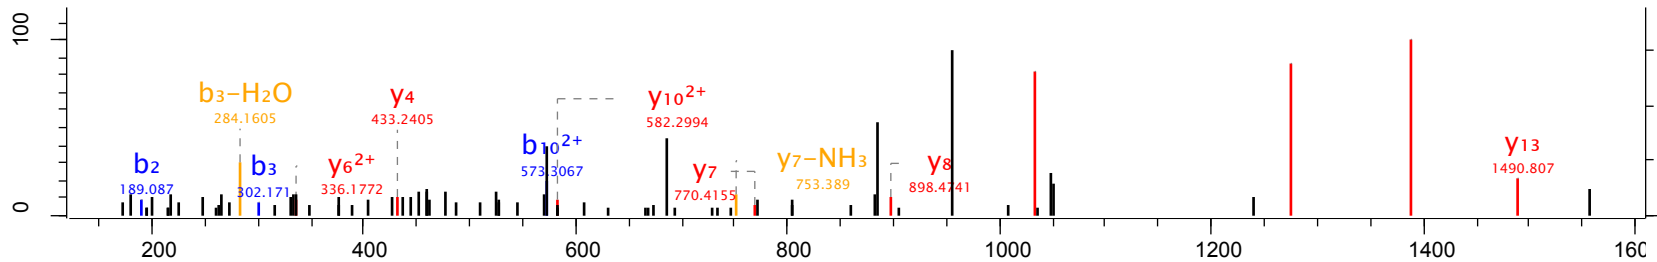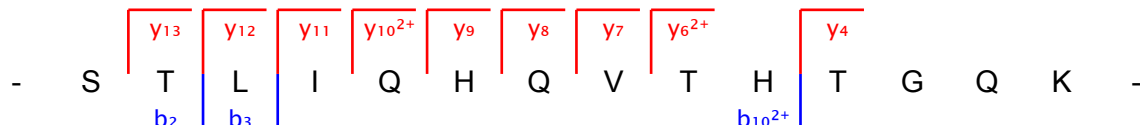



Raw file

20140925\_fract11\_dyn\_5ul\_C3\_01\_446

| Scan | Method   | Score | m/z    | Gene names |
|------|----------|-------|--------|------------|
| 8495 | TOF; CID | 125.5 | 465.49 | TMEM41A    |

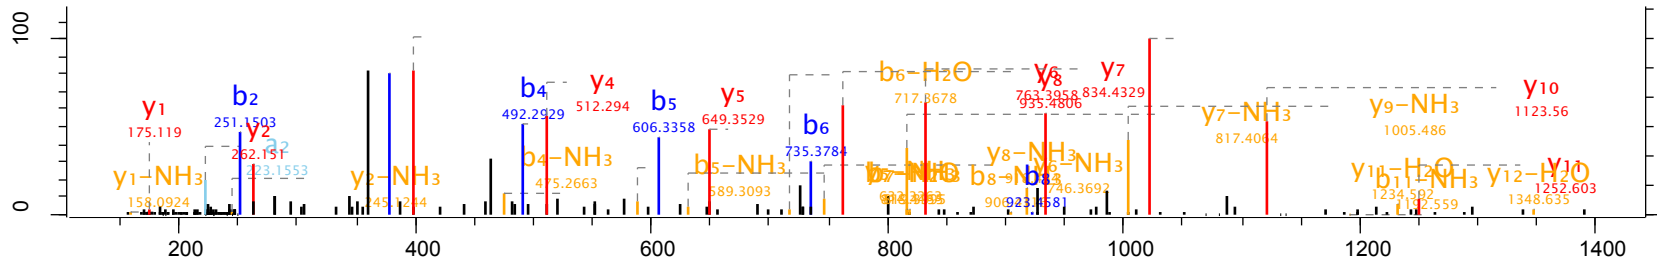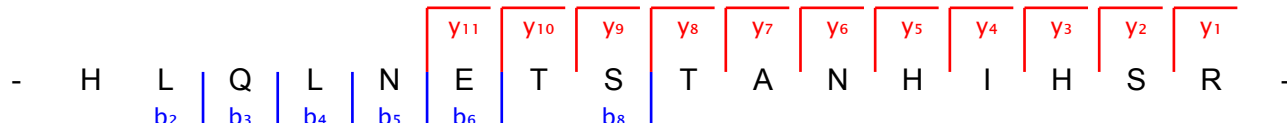

| Raw file                           | Scan | Method   | Score | m/z    | Gene names |
|------------------------------------|------|----------|-------|--------|------------|
| 20140925_fract11_dyn_5ul_C3_01_446 | 9106 | TOF; CID | 69.81 | 371.53 | R3HDM4     |

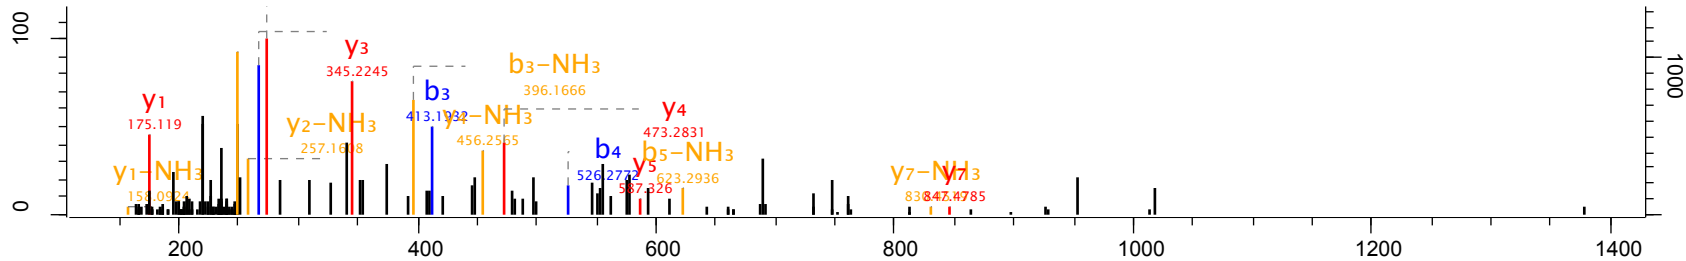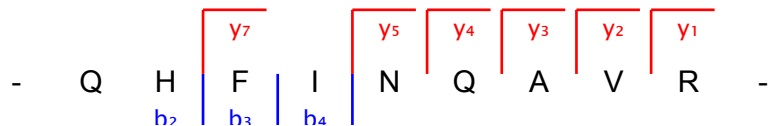

Raw file

20140925\_fract11\_dyn\_5ul\_C3\_01\_446

Scan

12344

Method

TOF; CID

Score

98.18

m/z

691.66

Gene names

FAM156A

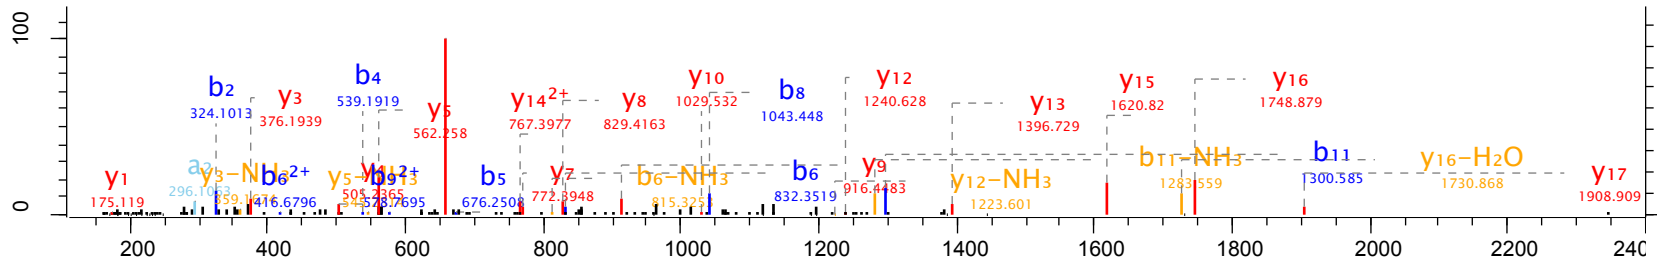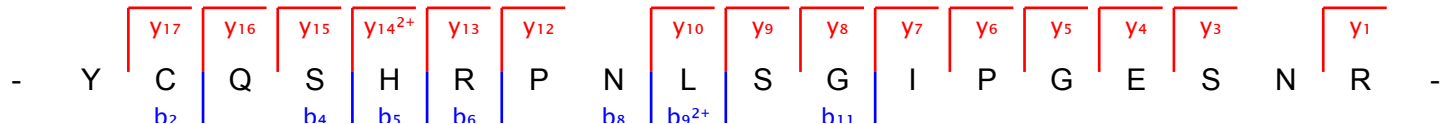

Raw file

20140925\_fract11\_dyn\_5ul\_C3\_01\_446

Scan

15350

Method

TOF; CID

Score

53.45

m/z

487.59

Gene names

SLC25A27

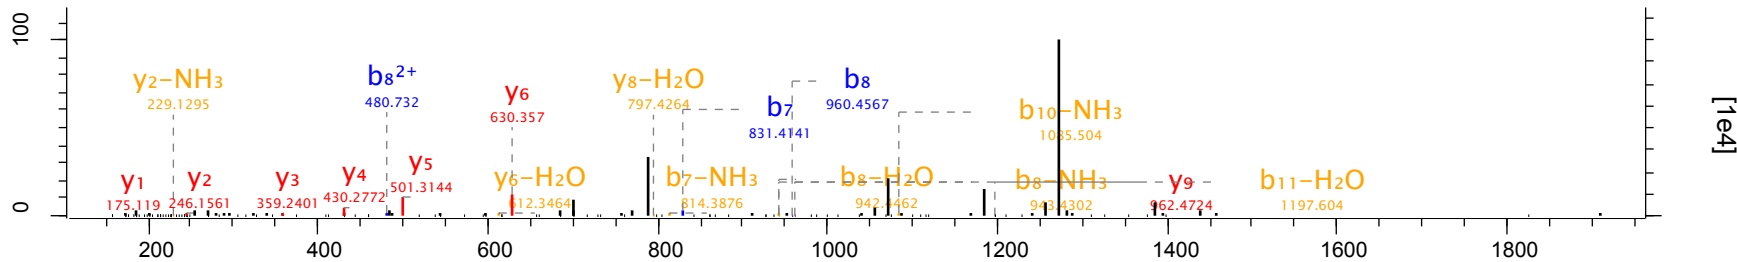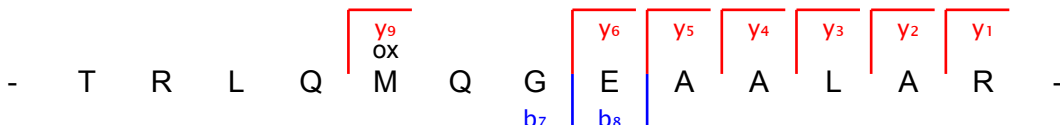

Raw file

Scan

Method

Score

m/z

Gene names

20140925\_fract11\_dyn\_5ul\_C3\_01\_446

15726

TOF; CID

81.53

479.27

SLIT1

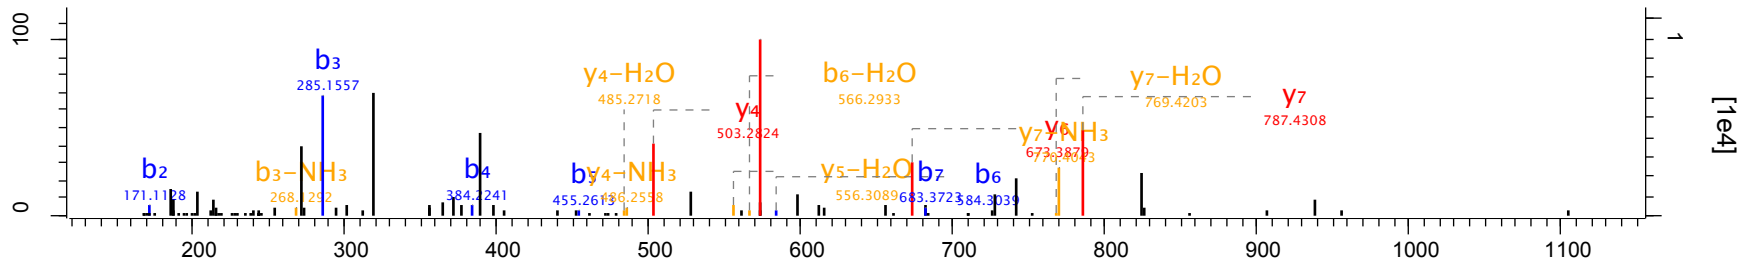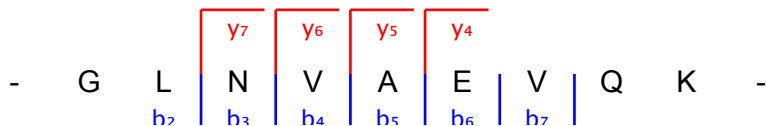

Raw file

Scan

Method

Score

m/z

Gene names

20140925\_fract11\_dyn\_5ul\_C3\_01\_446

16053

TOF; CID

168.85

617.83

SUMO2;SUMO3;SUMO4

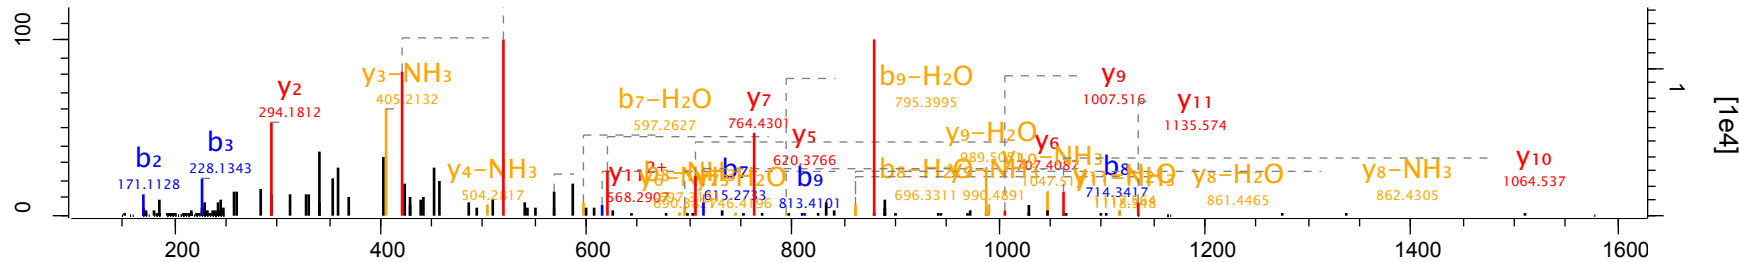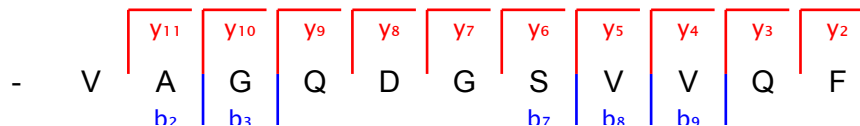

Raw file

20140925\_fract11\_dyn\_5ul\_C3\_01\_446

Scan

19613

Method

TOF; CID

Score

79.68

m/z

666.34

Gene names

ENKD1

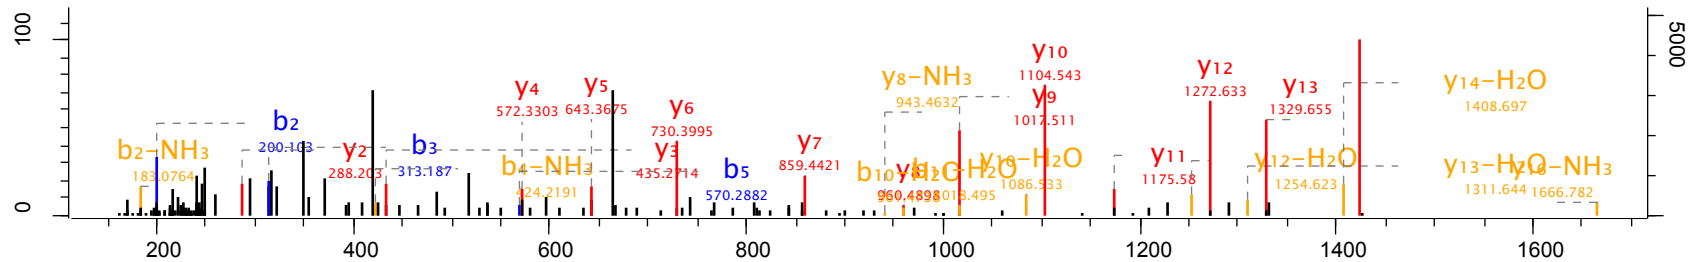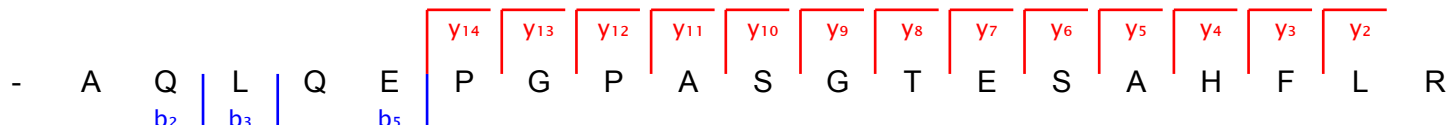

Raw file

20140925\_fract11\_dyn\_5ul\_C3\_01\_446

Scan

23347

Method

TOF; CID

Score

58.08

m/z

786.4

Gene names

DACH1

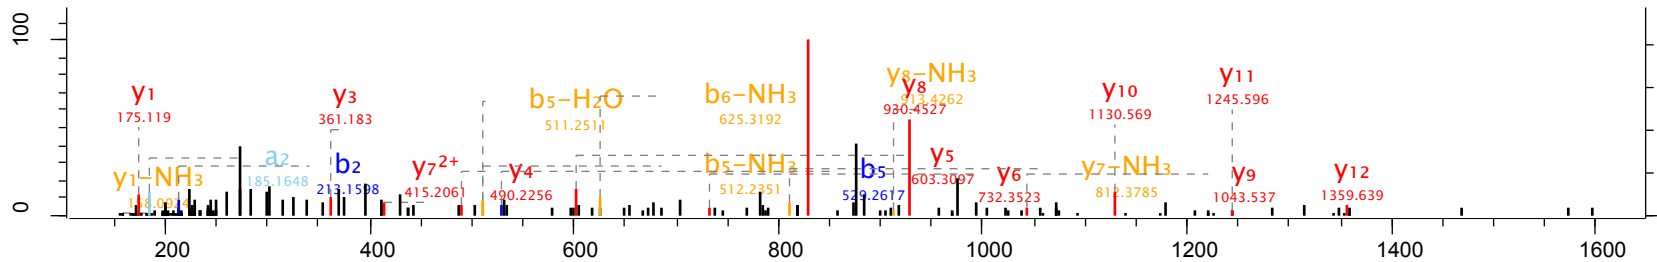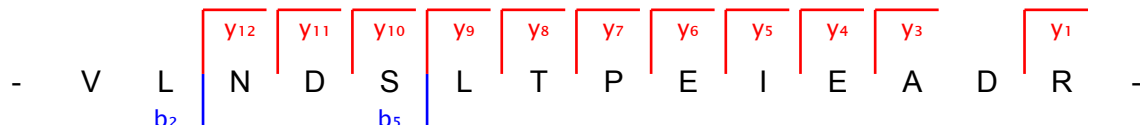



| Raw file                           | Scan  | Method   | Score | m/z    | Gene names |
|------------------------------------|-------|----------|-------|--------|------------|
| 20140925_fract11_dyn_5ul_C3_01_446 | 23959 | TOF; CID | 57.15 | 857.86 | MT-ND3     |

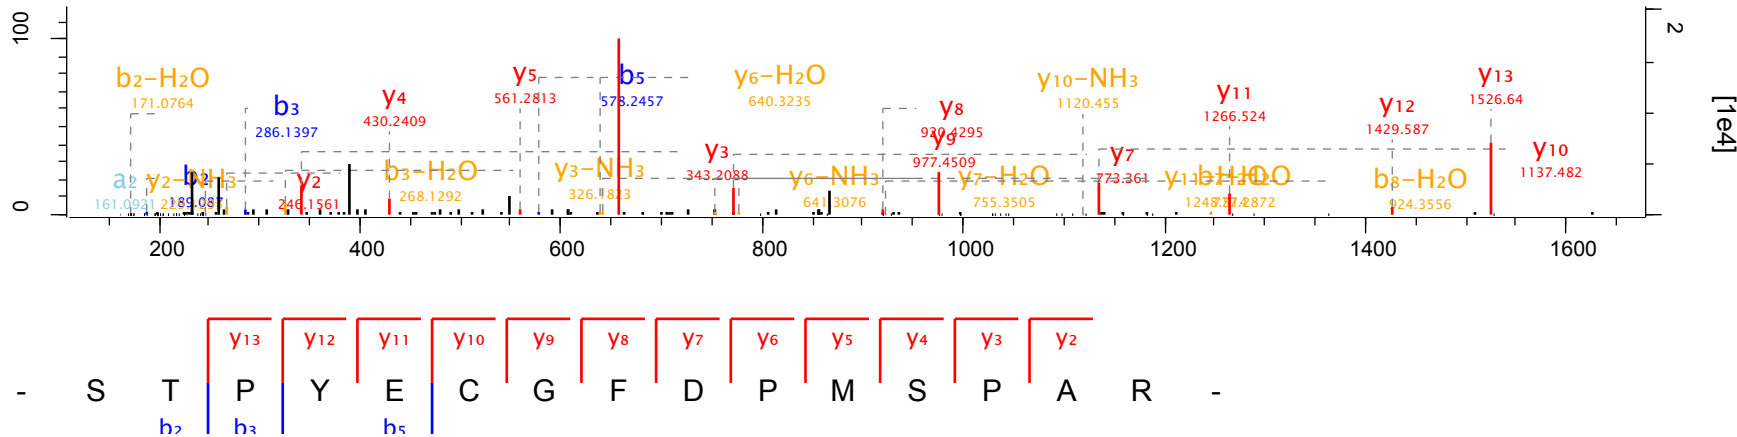

Raw file

Scan

Method

Score

m/z

Gene names

20140925\_fract11\_dyn\_5ul\_C3\_01\_446

25013

TOF; CID

75.38

664.98

DCUN1D2

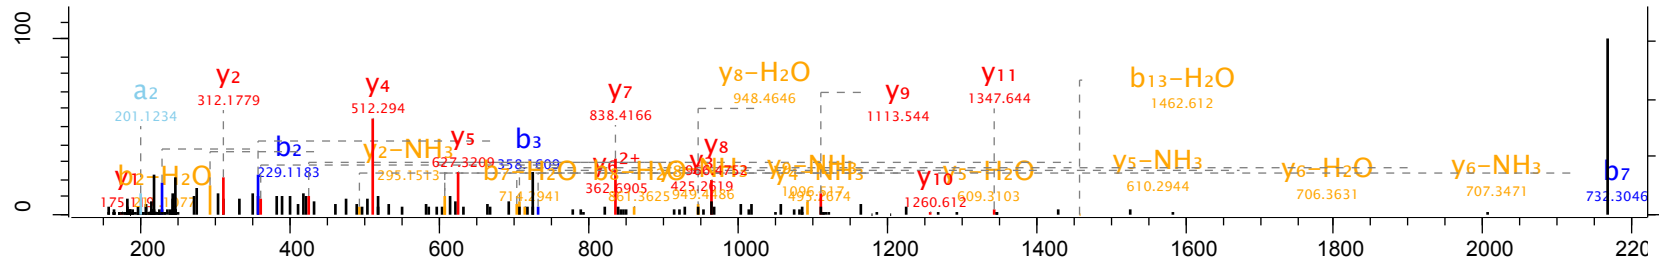

- L D E A T D S F F Q N P D S L H R -

b<sub>2</sub> | b<sub>3</sub> | b<sub>7</sub>

y<sub>11</sub> | y<sub>10</sub> | y<sub>9</sub> | y<sub>8</sub> | y<sub>7</sub> | y<sub>6</sub><sup>2+</sup> | y<sub>5</sub> | y<sub>4</sub> | y<sub>3</sub> | y<sub>2</sub> | y<sub>1</sub>

| Raw file                           | Scan  | Method   | Score | m/z    | Gene names |
|------------------------------------|-------|----------|-------|--------|------------|
| 20140925_fract11_dyn_5ul_C3_01_446 | 27615 | TOF; CID | 70.94 | 648.33 | PEX2       |

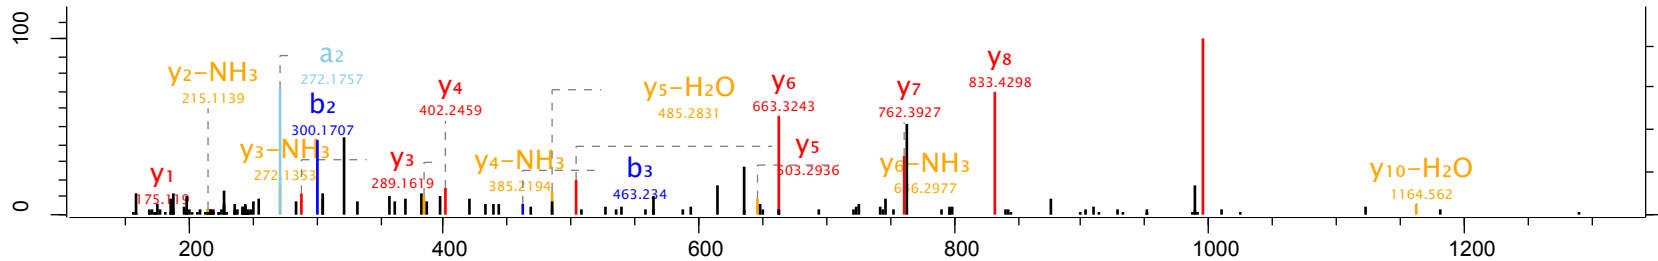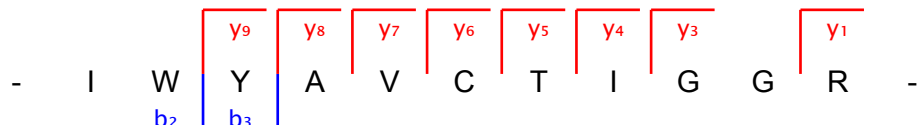

Raw file

20140925\_fract11\_dyn\_5ul\_C3\_01\_446

Scan

28160

Method

TOF; CID

Score

90.71

m/z

597.99

Gene names

DGCR2

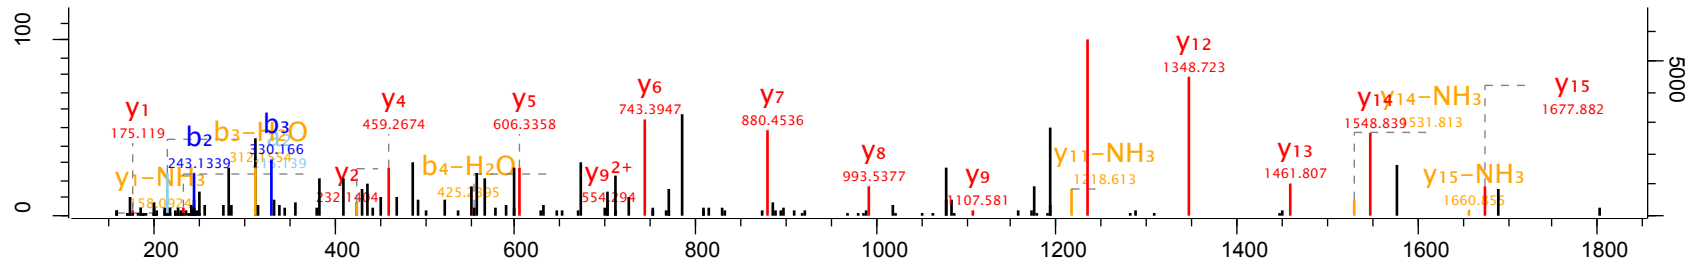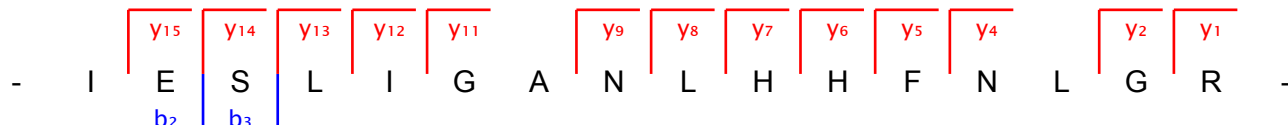

Raw file

Scan

Method

Score

m/z

Gene names

20140925\_fract11\_dyn\_5ul\_C3\_01\_446

28225

TOF; CID

57.53

404.23

SLITRK5;SLITRK6

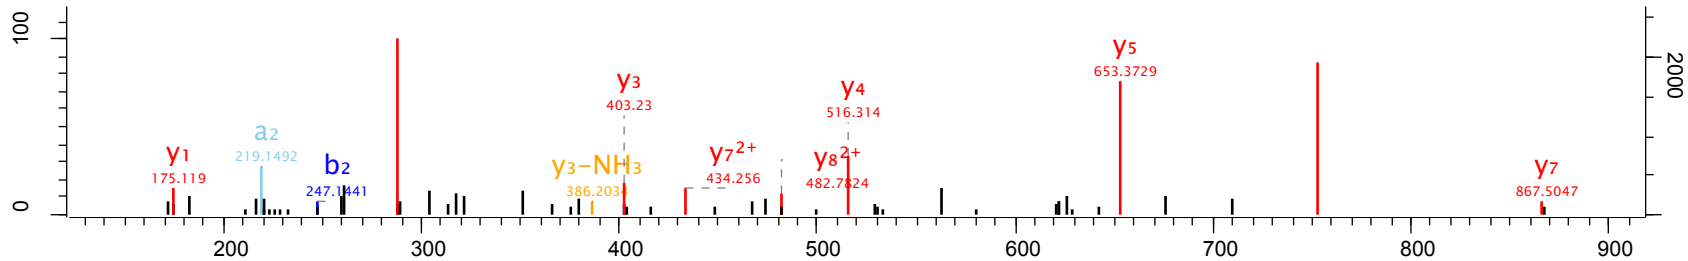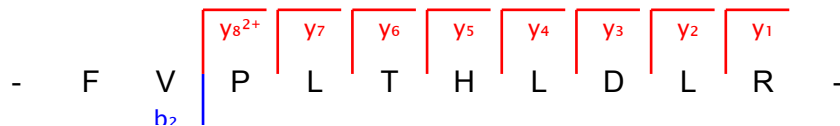

| Raw file                           | Scan  | Method   | Score  | m/z    | Gene names |
|------------------------------------|-------|----------|--------|--------|------------|
| 20140925_fract11_dyn_5ul_C3_01_446 | 29914 | TOF; CID | 114.97 | 623.38 | MT-ATP6    |

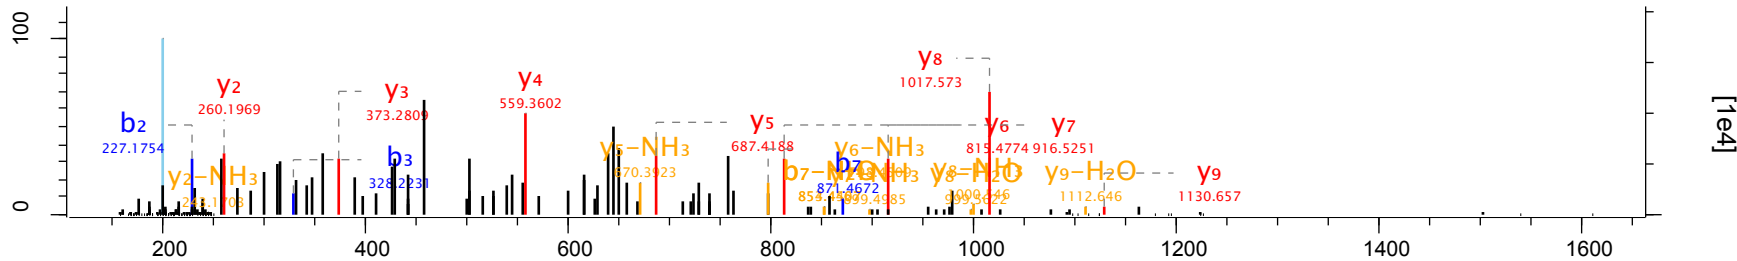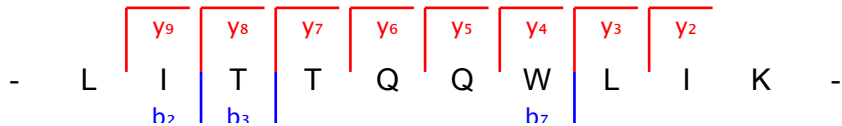

Raw file

20140925\_fract11\_dyn\_5ul\_C3\_01\_446

Scan

31134

Method

TOF; CID

Score

101.05

m/z

982.05

Gene names

RNF166

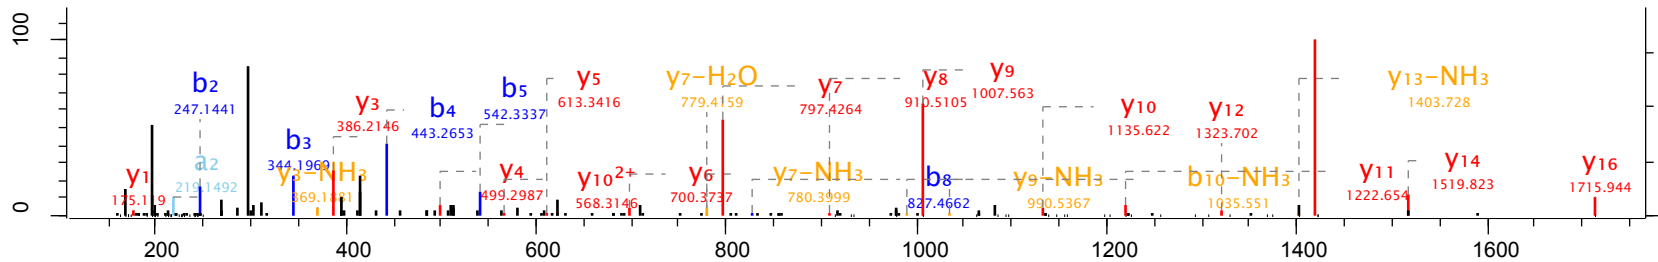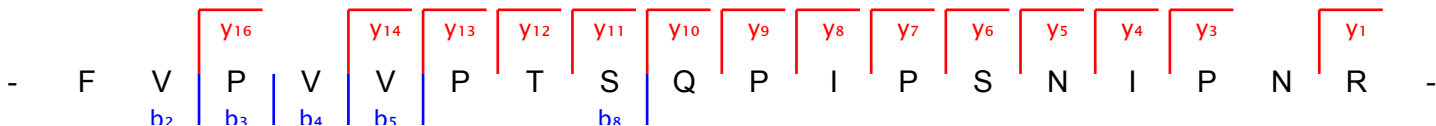

Raw file

20140925\_fract11\_dyn\_5ul\_C3\_01\_446

Scan

32157

Method

TOF; CID

Score

101.39

m/z

441.6

Gene names

SNX24

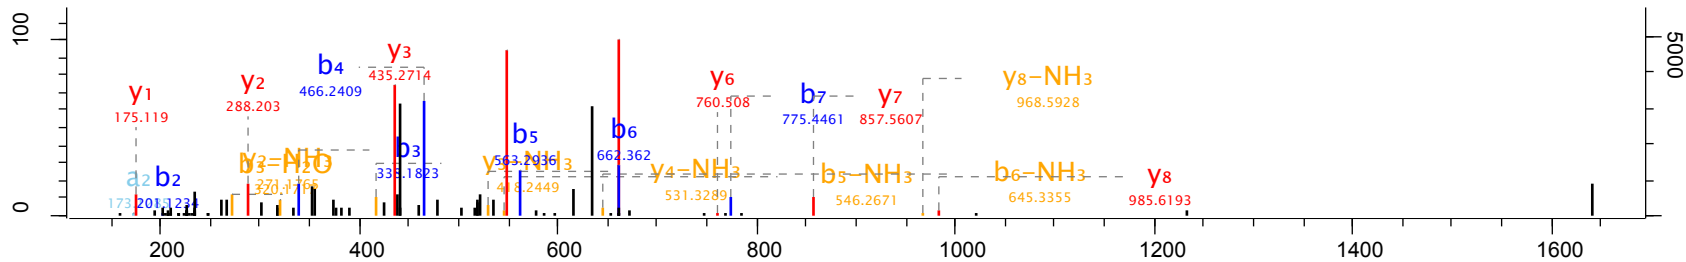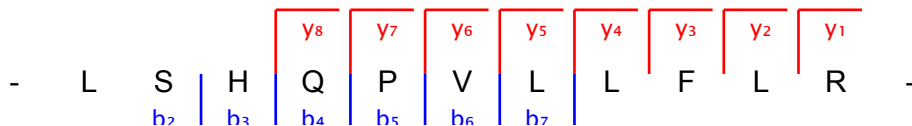



| Raw file                           | Scan  | Method   | Score  | m/z     | Gene names |
|------------------------------------|-------|----------|--------|---------|------------|
| 20140925_fract11_dyn_5ul_C3_01_446 | 36697 | TOF; CID | 106.12 | 1351.64 | SMAGP      |

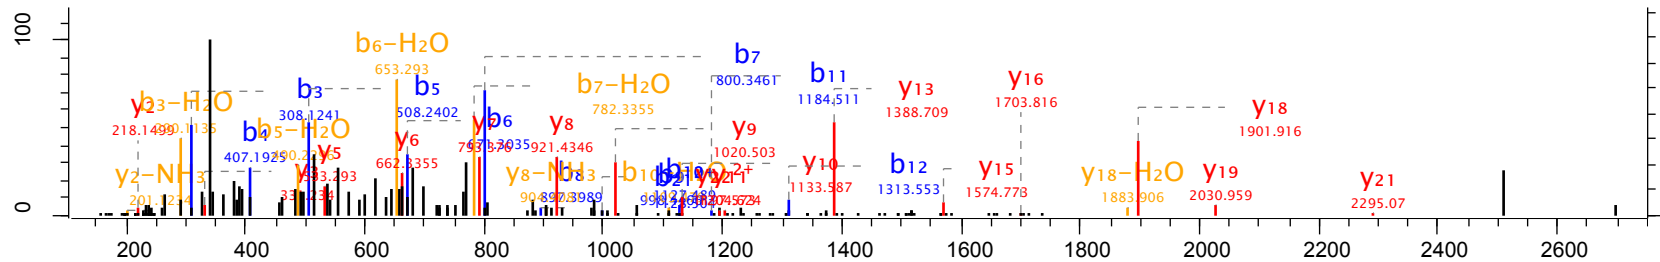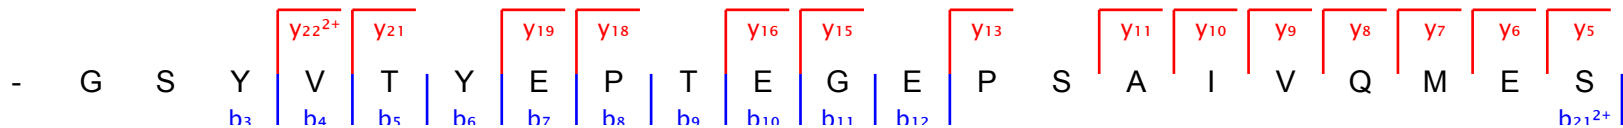

Raw file

20140925\_fract11\_dyn\_5ul\_C3\_01\_446

Scan

37178

Method

TOF; CID

Score

80.92

m/z

588.34

Gene names

SLC35B3

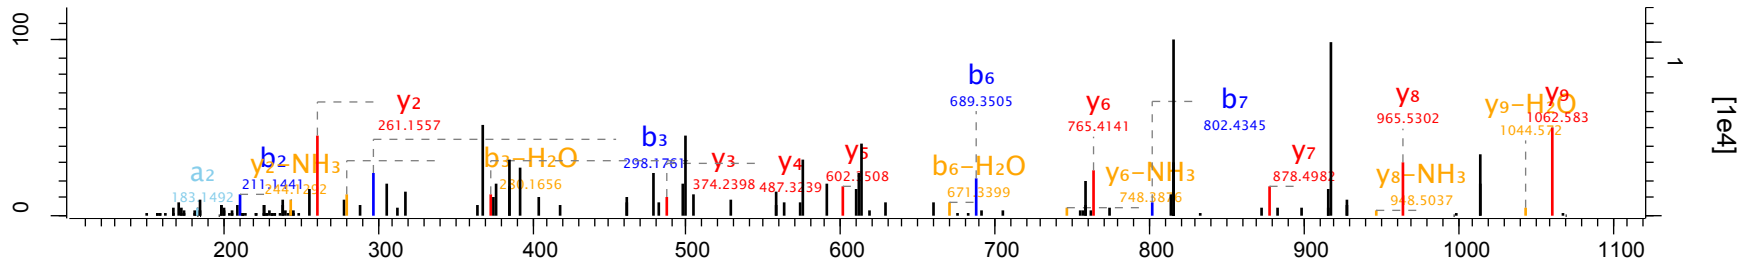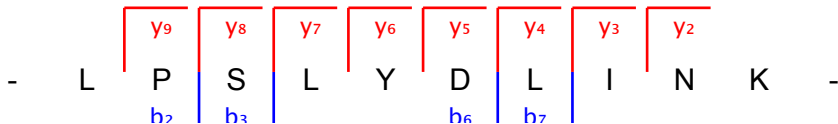

Raw file

20140925\_fract11\_dyn\_5ul\_C3\_01\_446

Scan

37227

Method

TOF; CID

Score

113.93

m/z

610.3

Gene names

CMTM6

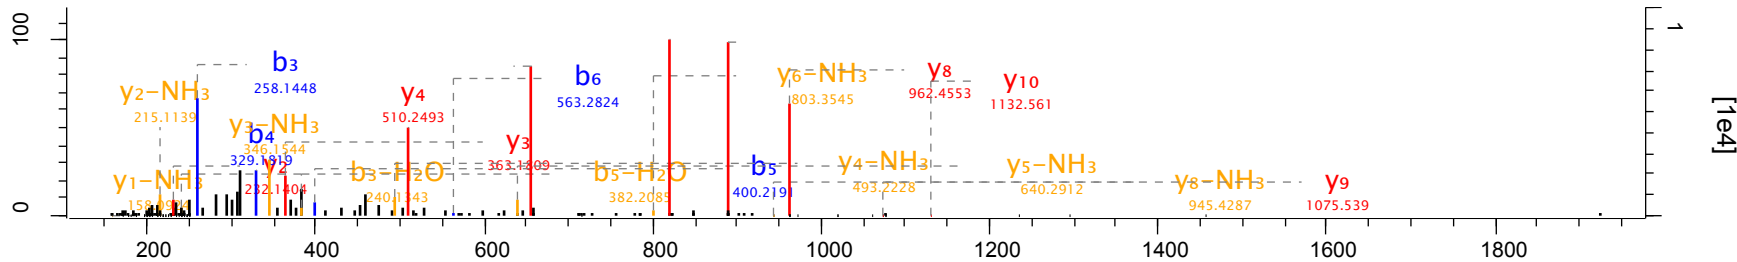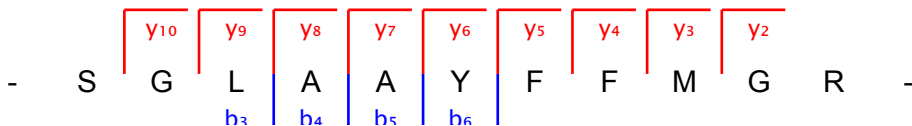

Raw file

20140925\_fract12\_dyn\_5ul\_C4\_01\_447

Scan

9556

Method

TOF; CID

Score

101.6

m/z

497.3

Gene names

RWDD2A

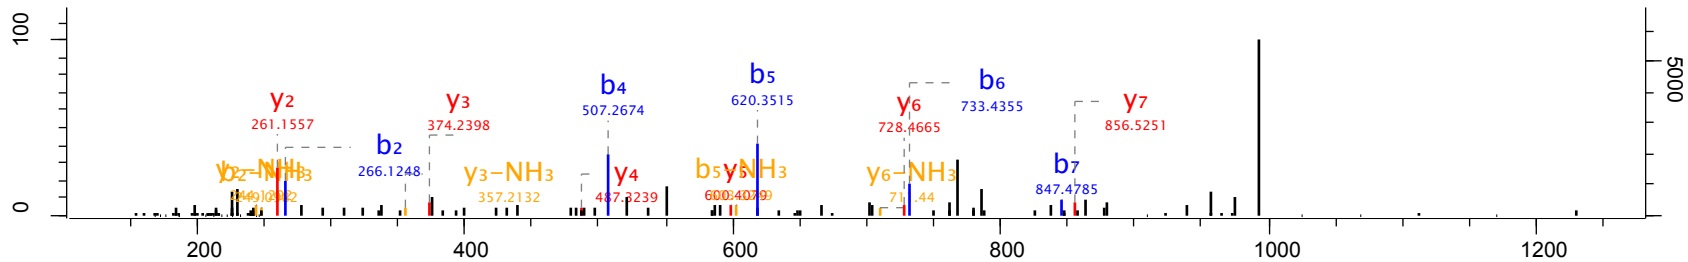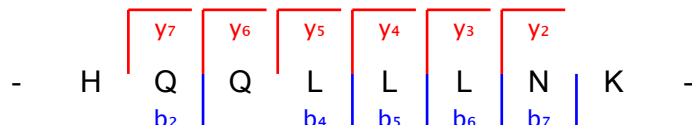

Raw file

20140925\_fract12\_dyn\_5ul\_C4\_01\_447

Scan

10892

Method

TOF; CID

Score

67.38

m/z

543.8

Gene names

SLC26A11

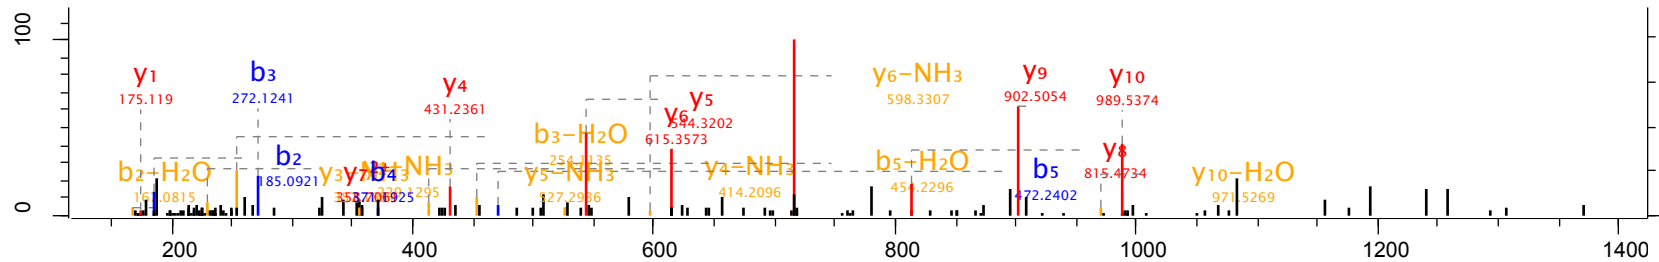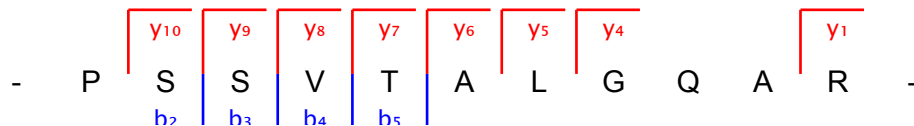

| Raw file                           | Scan  | Method   | Score | m/z    | Gene names |
|------------------------------------|-------|----------|-------|--------|------------|
| 20140925_fract12_dyn_5ul_C4_01_447 | 17730 | TOF; CID | 83.21 | 480.77 | FBXW11     |

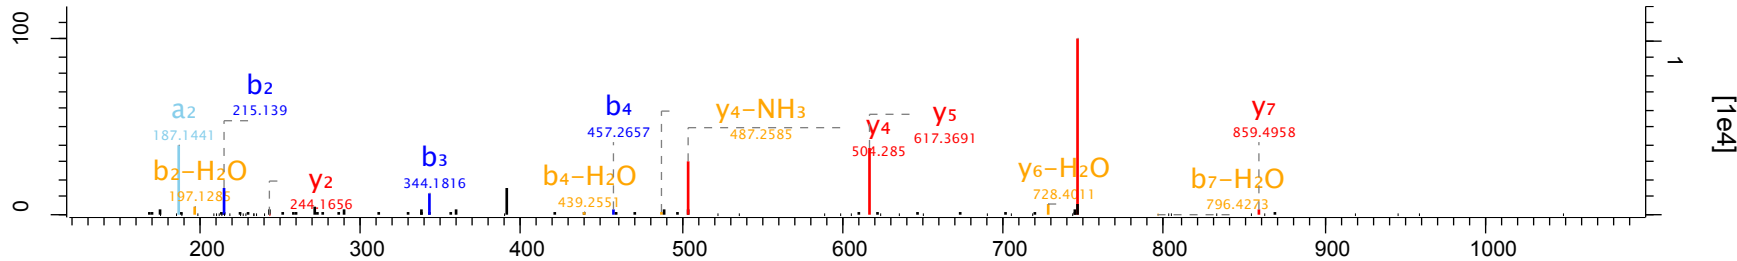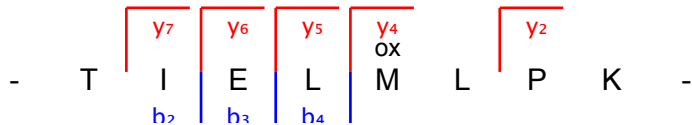

Raw file

Scan

Method

Score

m/z

Gene names

20140925\_fract12\_dyn\_5ul\_C4\_01\_447

18858

TOF; CID

32.88

938.45

CYSRT1

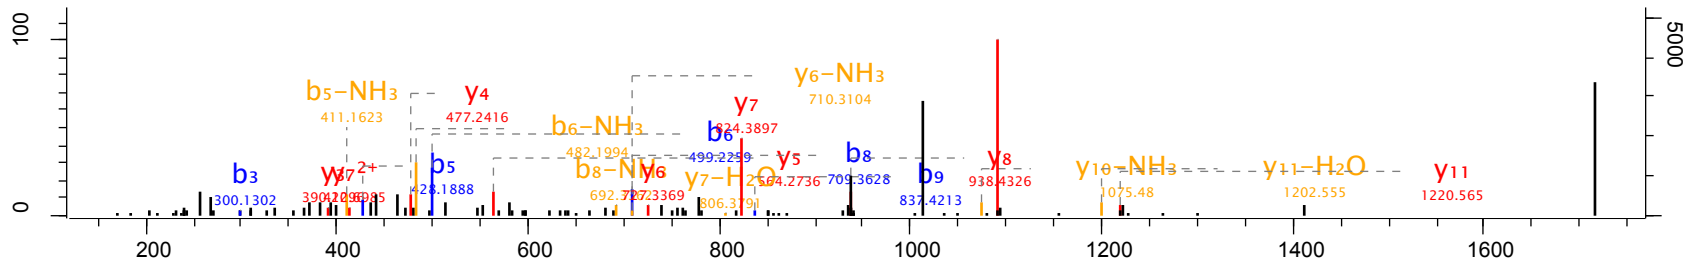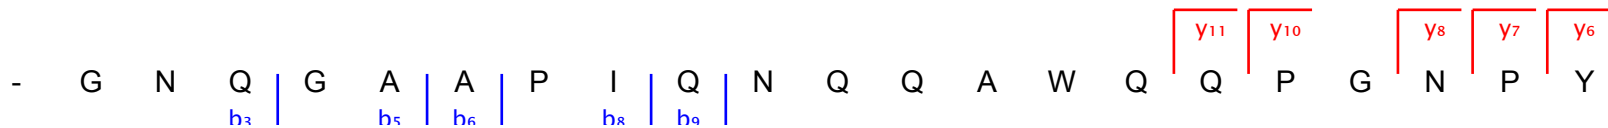

| Raw file                           | Scan  | Method   | Score | m/z    | Gene names |
|------------------------------------|-------|----------|-------|--------|------------|
| 20140925_fract12_dyn_5ul_C4_01_447 | 20140 | TOF; CID | 95.57 | 765.31 | SLC35F6    |

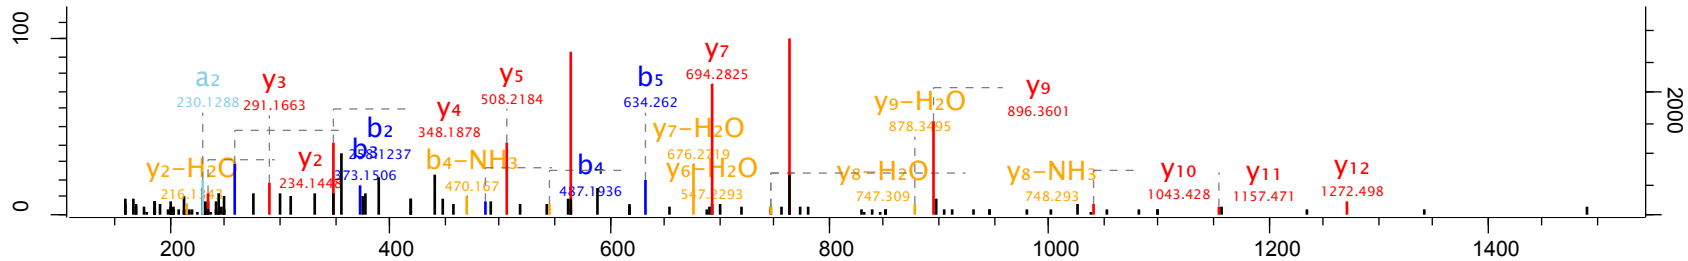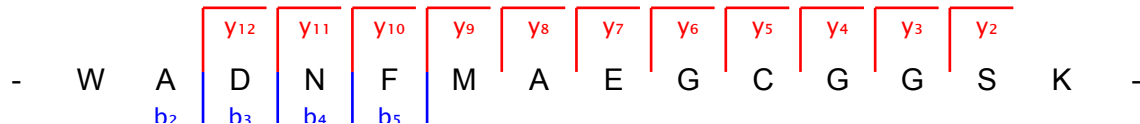



Raw file

20140925\_fract12\_dyn\_5ul\_C4\_01\_447

Scan

22540

Method

TOF; CID

Score

55.26

m/z

746.37

Gene names

FRMD4B

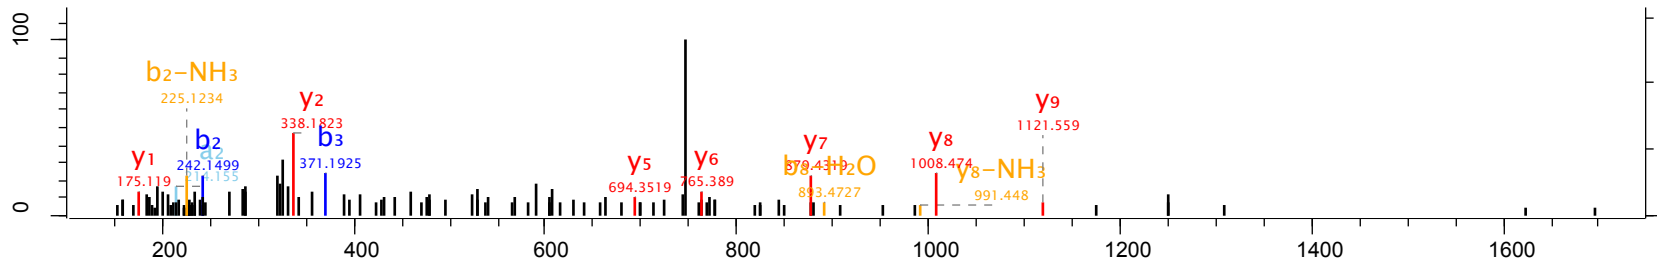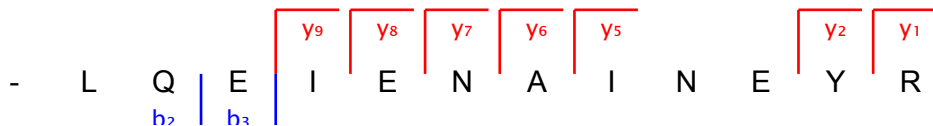

Raw file

20140925\_fract12\_dyn\_5ul\_C4\_01\_447

Scan

24858

Method

TOF; CID

Score

45.56

m/z

984.13

Gene names

DOK1

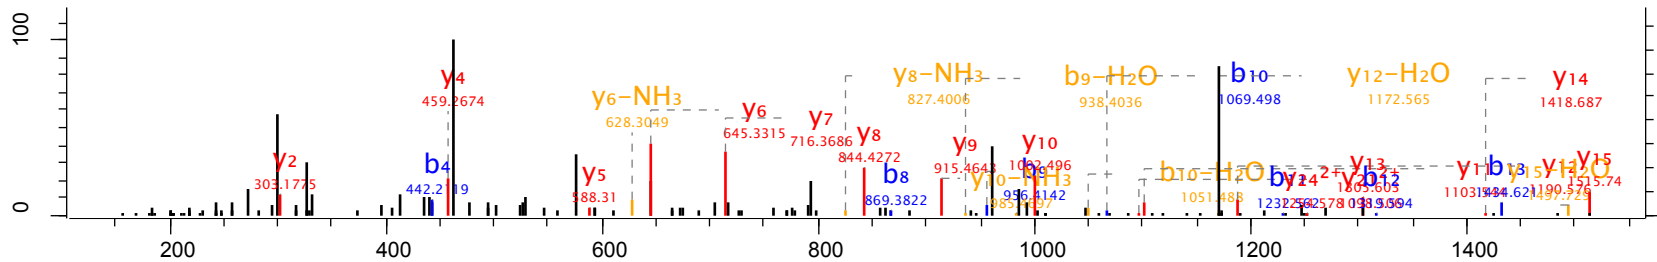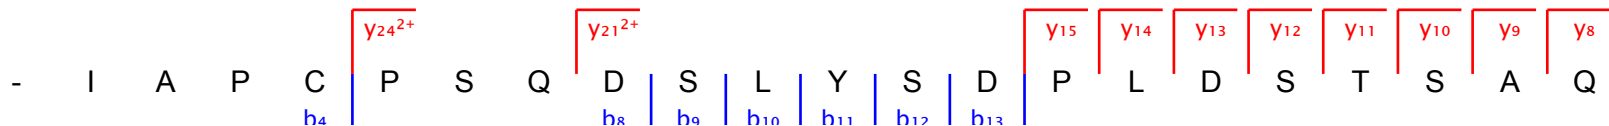

Raw file

20140925\_fract12\_dyn\_5ul\_C4\_01\_447

Scan

24983

Method

TOF; CID

Score

68.85

m/z

572.31

Gene names

ICA1

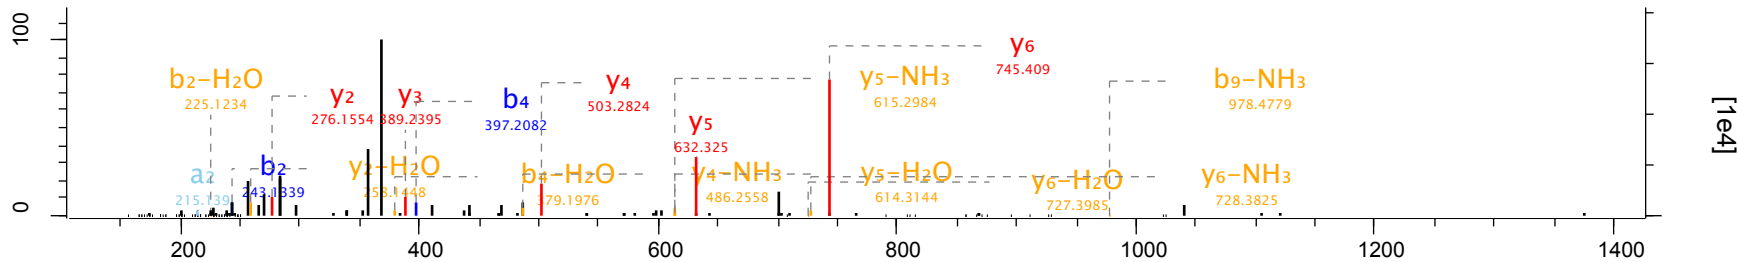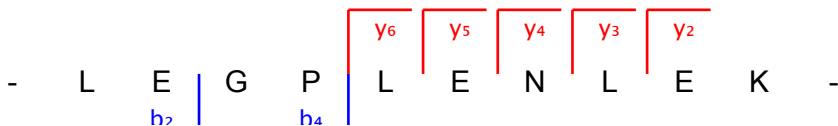

Raw file

20140925\_fract12\_dyn\_5ul\_C4\_01\_447

Scan

25295

Method

TOF; CID

Score

61.11

m/z

486.95

Gene names

TIGD1

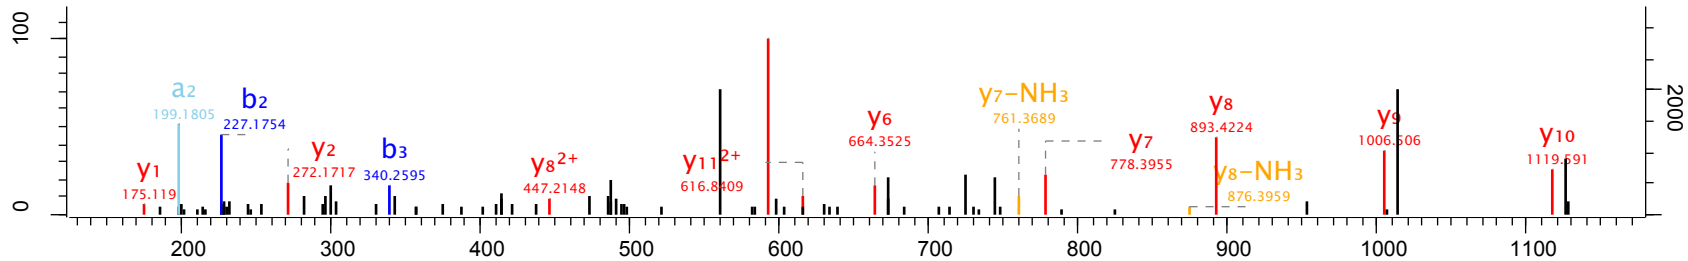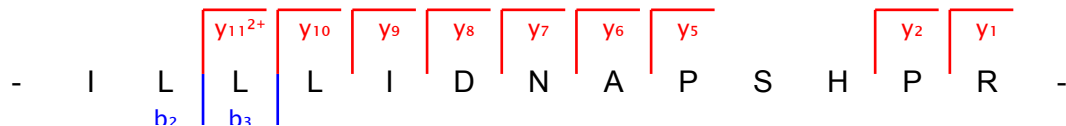

Raw file

Scan

Method

Score

m/z

Gene names

20140925\_fract12\_dyn\_5ul\_C4\_01\_447

29198

TOF; CID

79.69

879.44

RARA

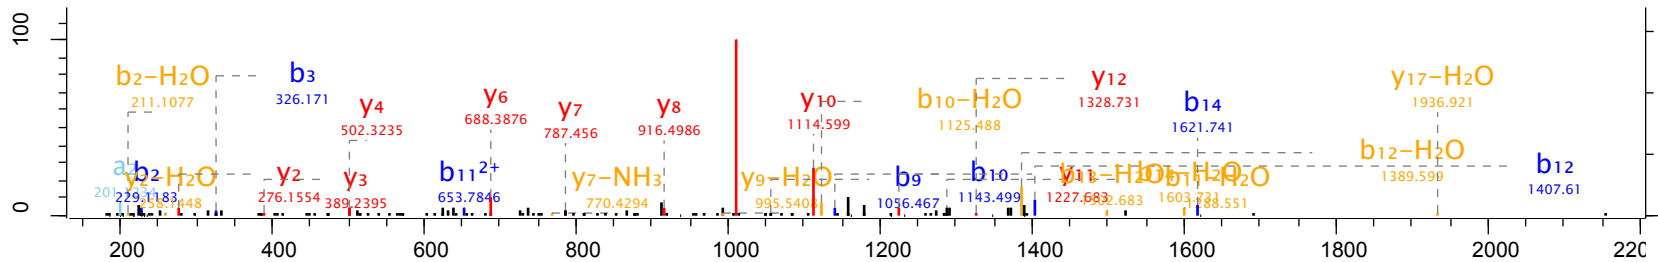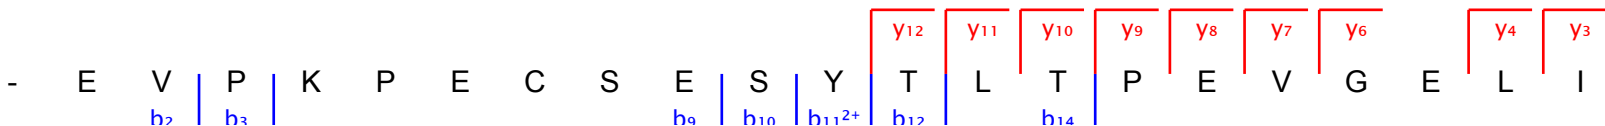

Raw file

20140925\_fract12\_dyn\_5ul\_C4\_01\_447

Scan

30367

Method

TOF; CID

Score

69.72

m/z

492.94

Gene names

TOR1AIP2

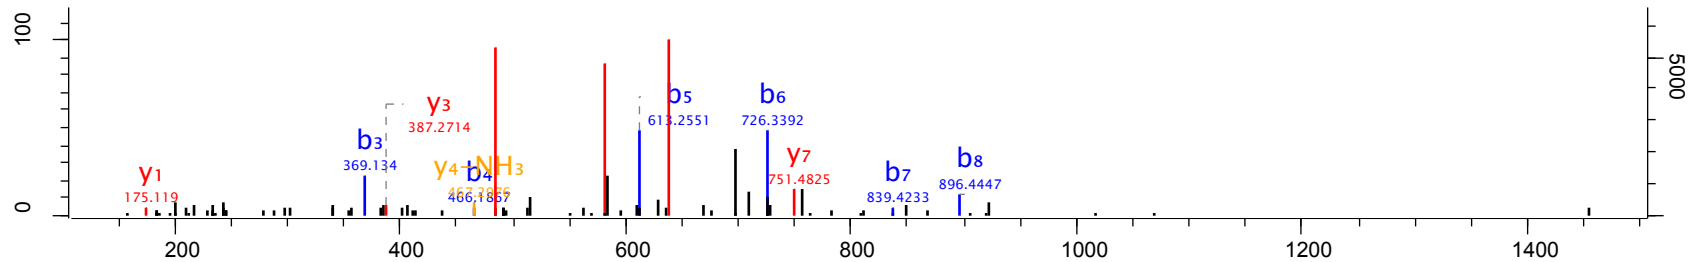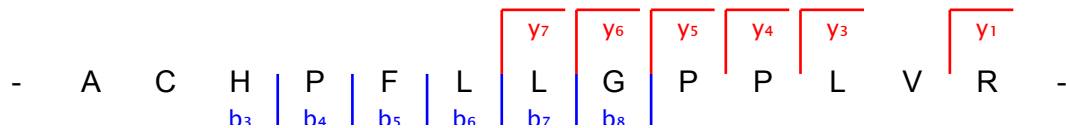

Raw file

20140925\_fract12\_dyn\_5ul\_C4\_01\_447

Scan

31046

Method

TOF; CID

Score

77.22

m/z

531.29

Gene names

DUSP19

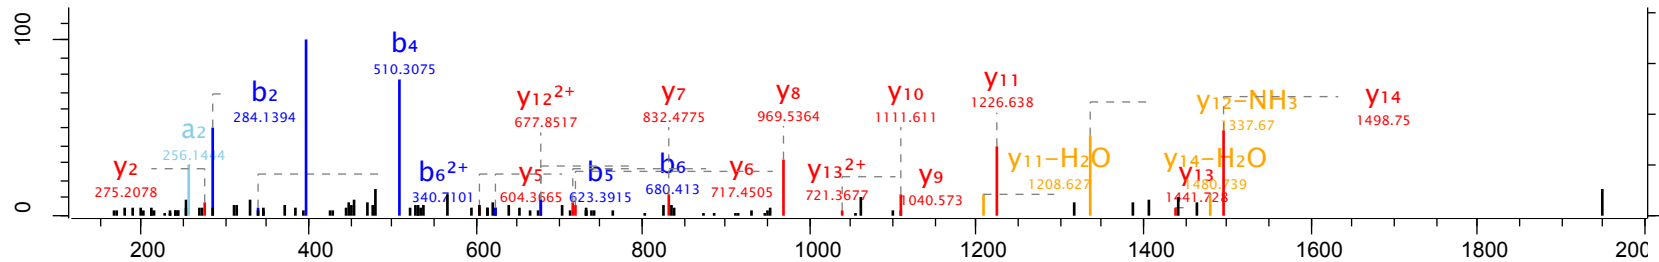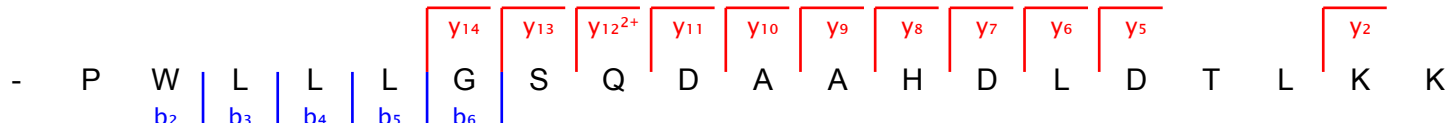

Raw file

20140925\_fract12\_dyn\_5ul\_C4\_01\_447

Scan

31107

Method

TOF; CID

Score

118.51

m/z

510.62

Gene names

TNFSF13

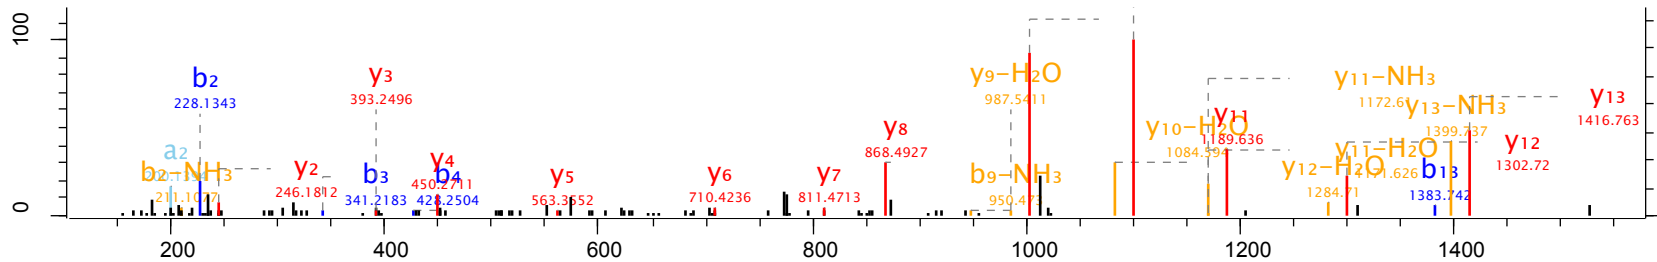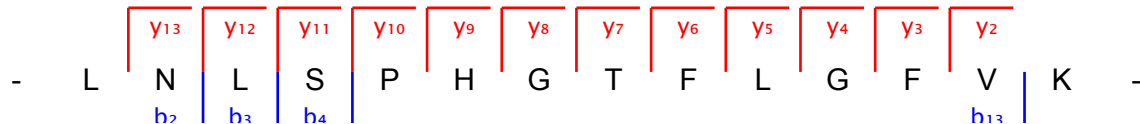



Raw file

Scan

Method

Score

m/z

Gene names

20140925\_fract12\_dyn\_5ul\_C4\_01\_447

34863

TOF; CID

86.56

886.44

SLC39A8

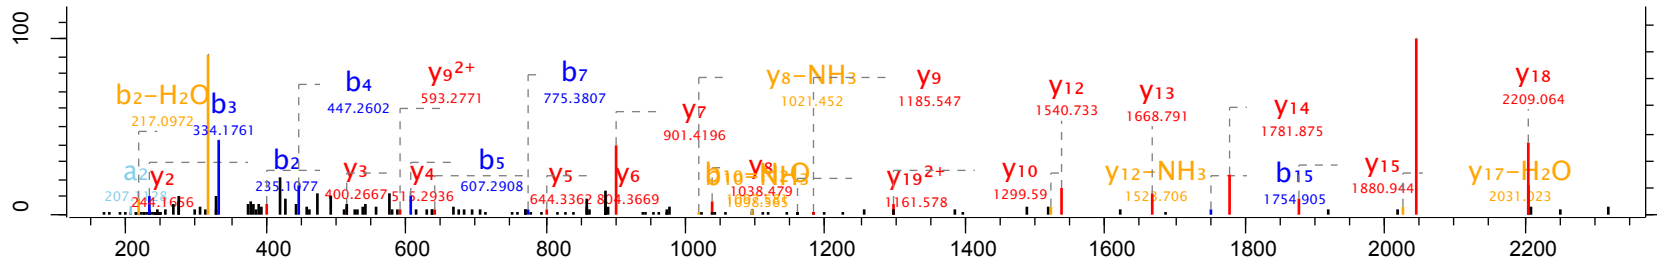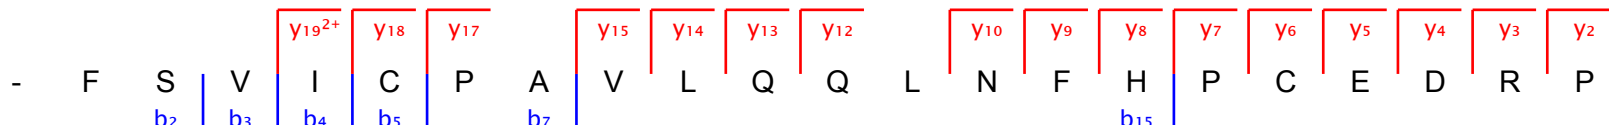

| Raw file                           | Scan  | Method   | Score | m/z    | Gene names |
|------------------------------------|-------|----------|-------|--------|------------|
| 20140925_fract12_dyn_5ul_C4_01_447 | 34891 | TOF; CID | 39.96 | 539.64 | CARD8      |

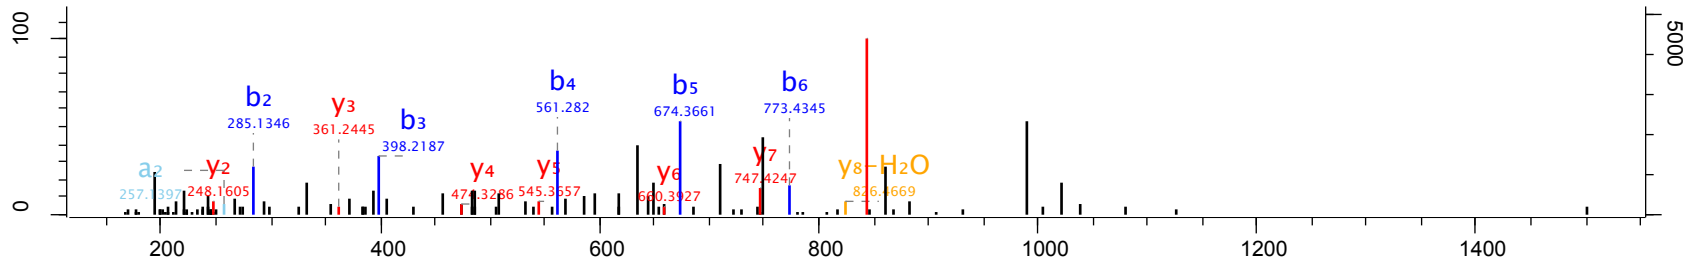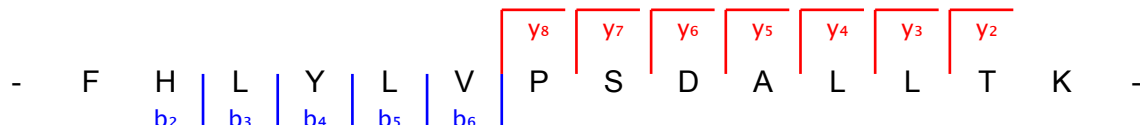

Raw file

Scan

Method

Score

m/z

Gene names

20140925\_fract12\_dyn\_5ul\_C4\_01\_447

36572

TOF; CID

70.06

608.83

PCDH15

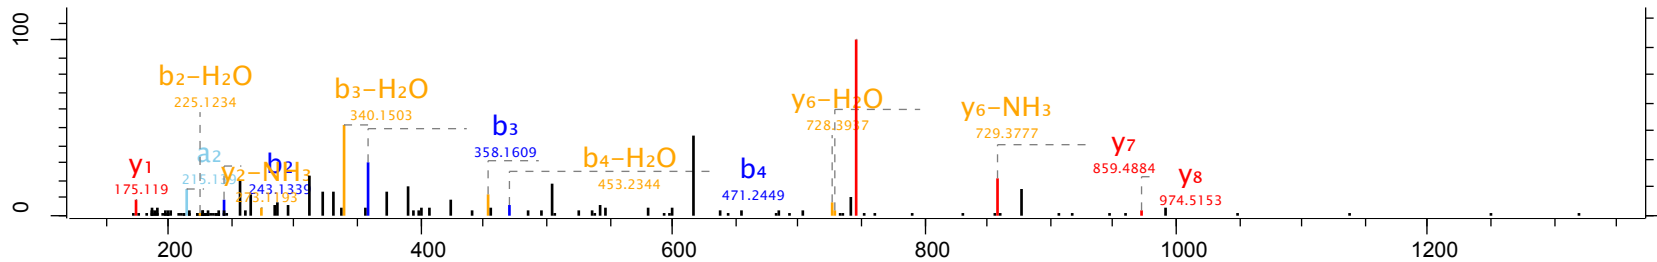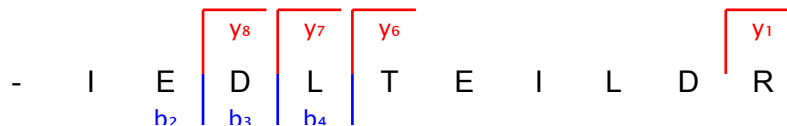

Raw file

Scan

Method

Score

m/z

Gene names

20140925\_fract12\_dyn\_5ul\_C4\_01\_447

37046

TOF; CID

36.13

728.38

S100A12

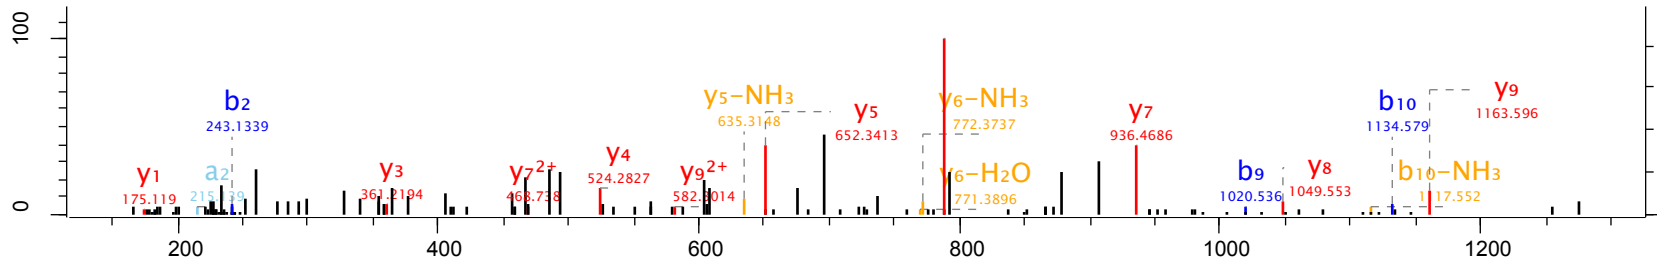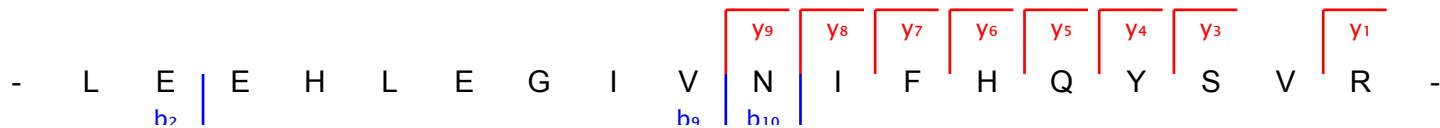

Raw file

Scan

Method

Score

m/z

Gene names

20140925\_fract12\_dyn\_5ul\_C4\_01\_447

37375

TOF; CID

115.68

821.45

ATP6V0D2

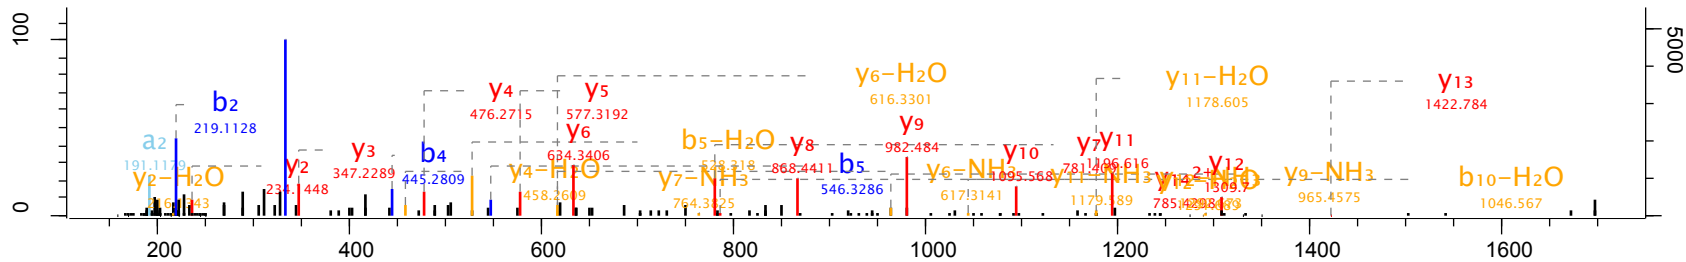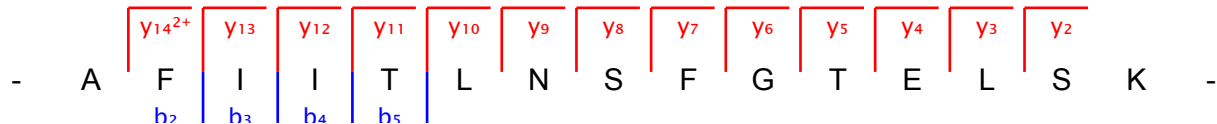

| Raw file                           | Scan  | Method   | Score  | m/z    | Gene names |
|------------------------------------|-------|----------|--------|--------|------------|
| 20140925_fract12_dyn_5ul_C4_01_447 | 38790 | TOF; CID | 145.46 | 603.83 | ANAPC15    |

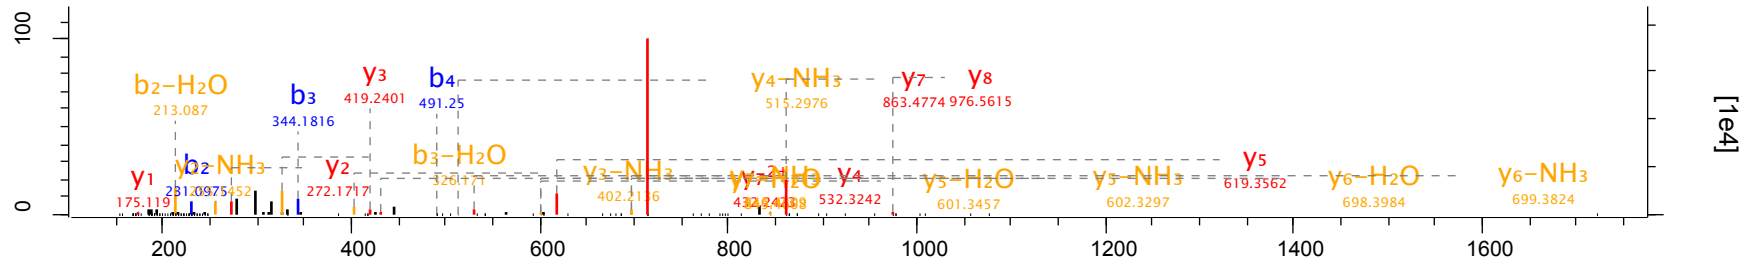

ac

- S T L F P S L F P R -

b<sub>2</sub> b<sub>3</sub> b<sub>4</sub>

y<sub>8</sub> y<sub>7</sub> y<sub>6</sub> y<sub>5</sub> y<sub>4</sub> y<sub>3</sub> y<sub>2</sub> y<sub>1</sub>

Raw file

20140925\_fract13\_dyn\_5ul\_C5\_01\_448

Scan

8066

Method

TOF; CID

Score

107.65

m/z

463.92

Gene names

ARNTL2

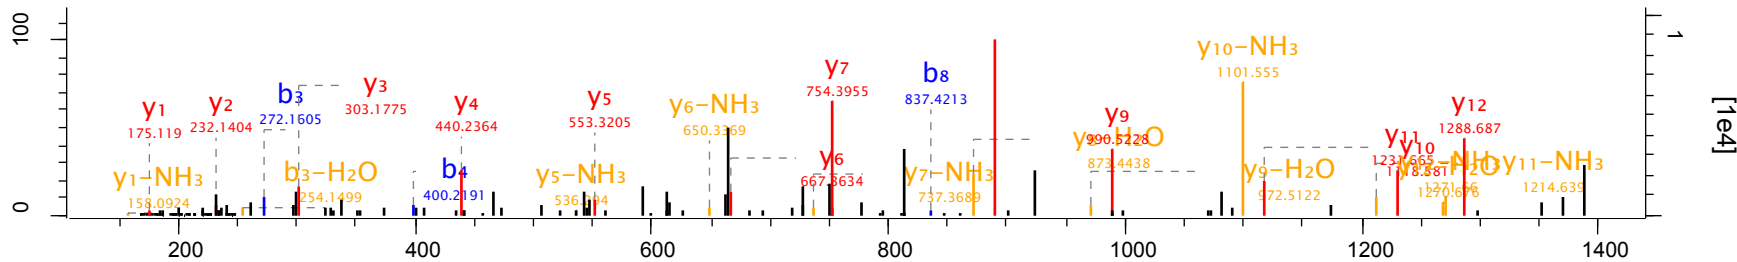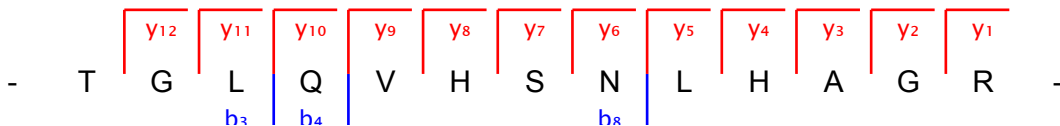

Raw file

Scan

Method

Score

m/z

Gene names

20140925\_fract13\_dyn\_5ul\_C5\_01\_448

10820

TOF; CID

99.3

464.27

GTF2A2

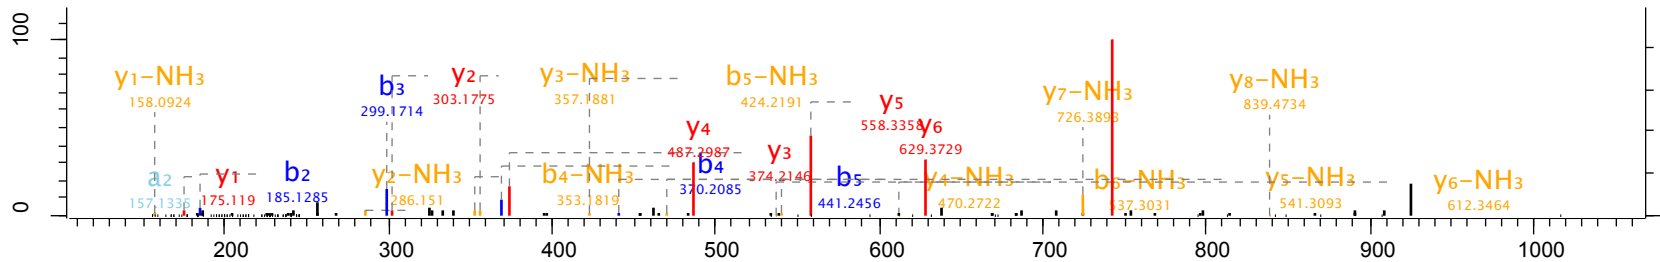

[1e4]

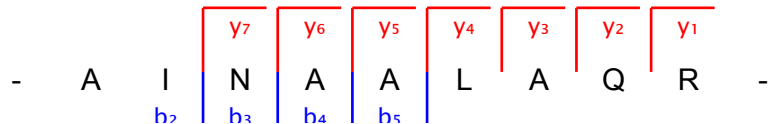



| Raw file                           | Scan  | Method   | Score | m/z    | Gene names |
|------------------------------------|-------|----------|-------|--------|------------|
| 20140925_fract13_dyn_5ul_C5_01_448 | 13203 | TOF; CID | 83.21 | 432.26 | FOSL1      |

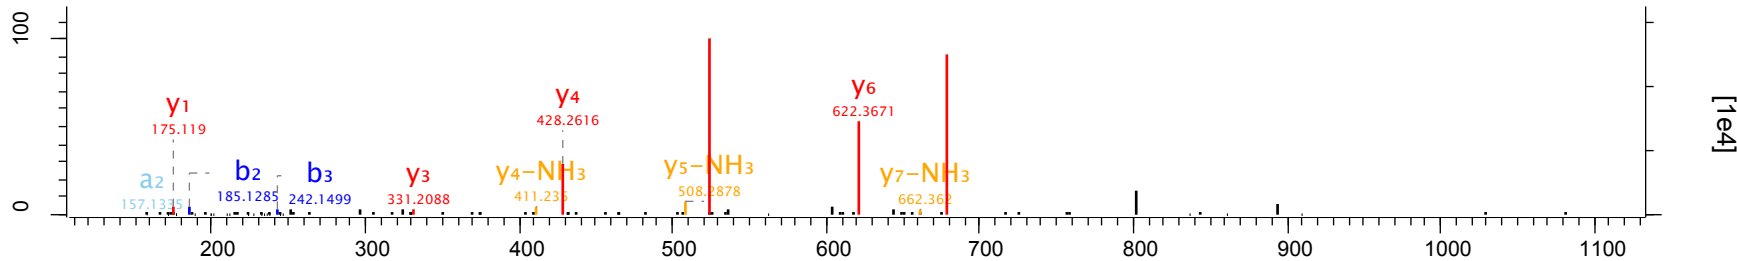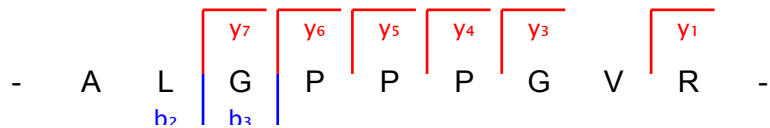

Raw file

20140925\_fract13\_dyn\_5ul\_C5\_01\_448

Scan

19649

Method

TOF; CID

Score

73.83

m/z

713.36

Gene names

YIF1A

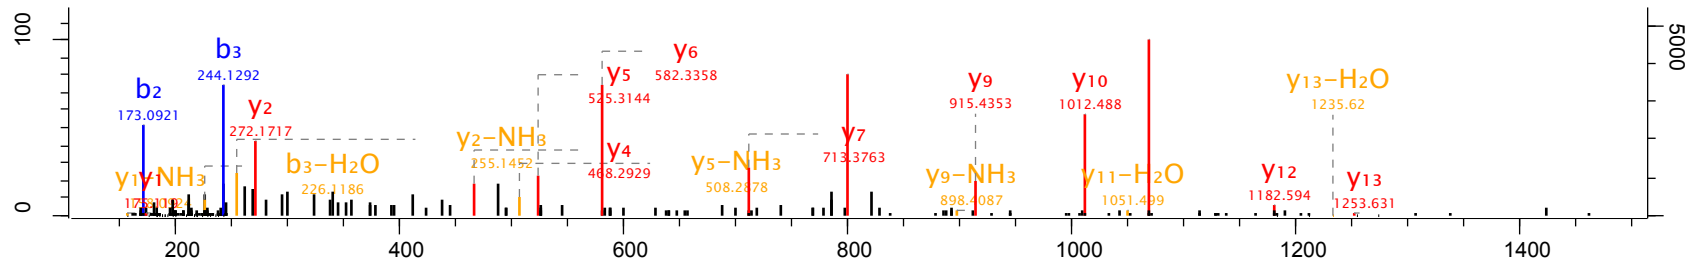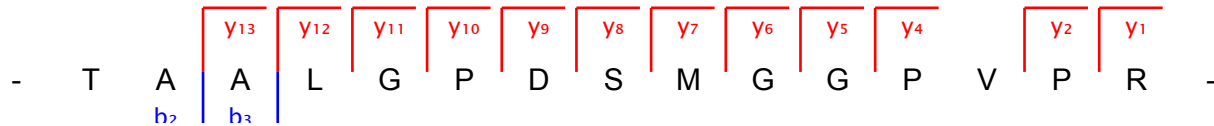

| Raw file                           | Scan  | Method   | Score | m/z    | Gene names |
|------------------------------------|-------|----------|-------|--------|------------|
| 20140925_fract13_dyn_5ul_C5_01_448 | 20213 | TOF; CID | 65.42 | 536.02 | IRAK2      |

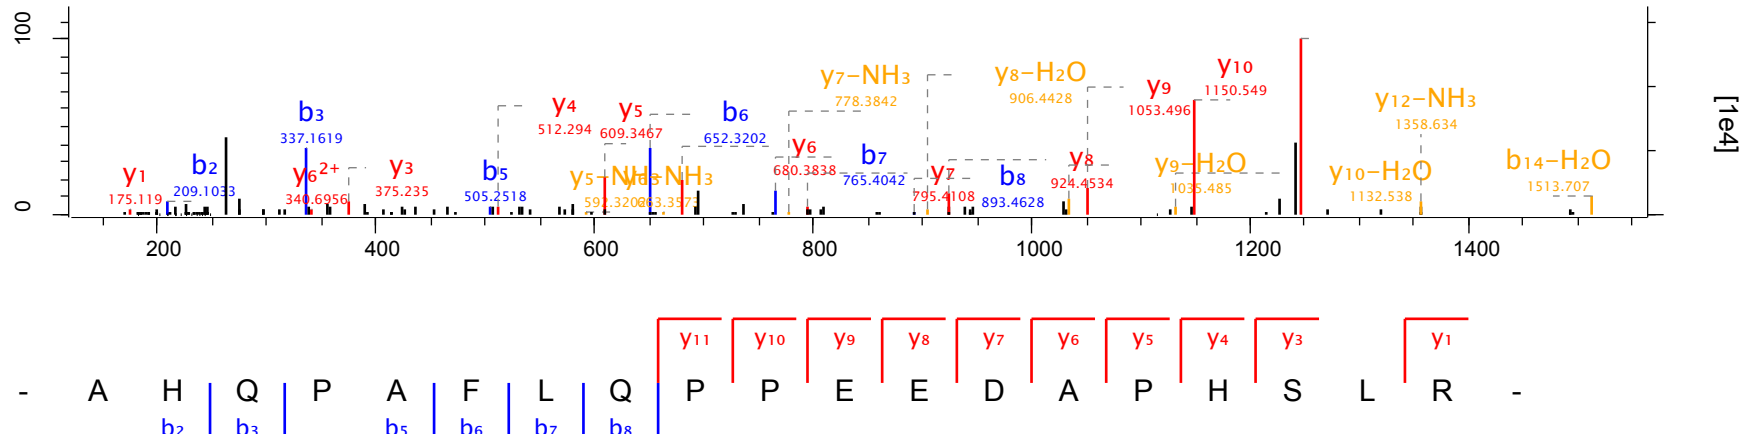

Raw file

20140925\_fract13\_dyn\_5ul\_C5\_01\_448

Scan

21856

Method

TOF; CID

Score

52.87

m/z

971.93

Gene names

LYPD3

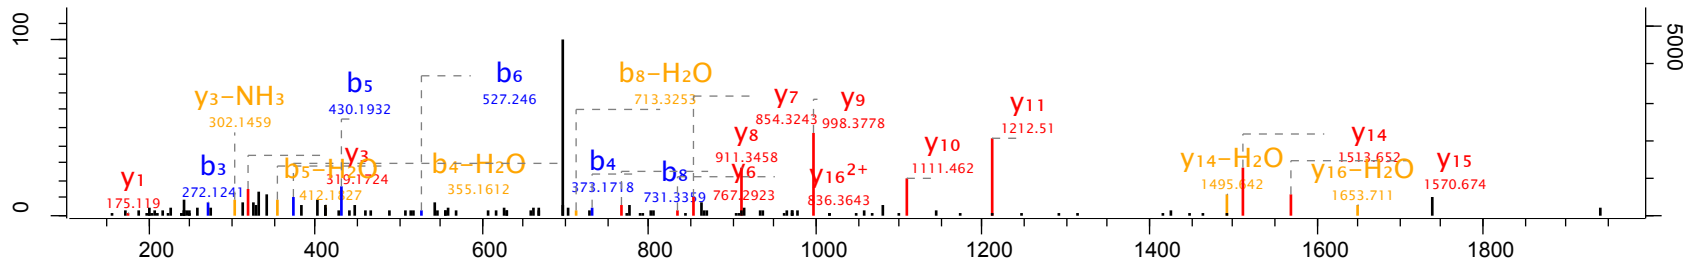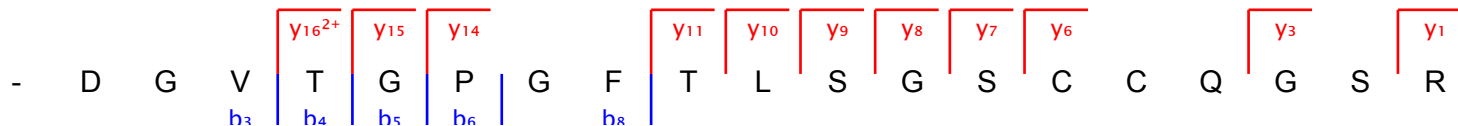

Raw file

Scan

Method

Score

m/z

Gene names

20140925\_fract13\_dyn\_5ul\_C5\_01\_448

22877

TOF; CID

73.39

767.89

PREP

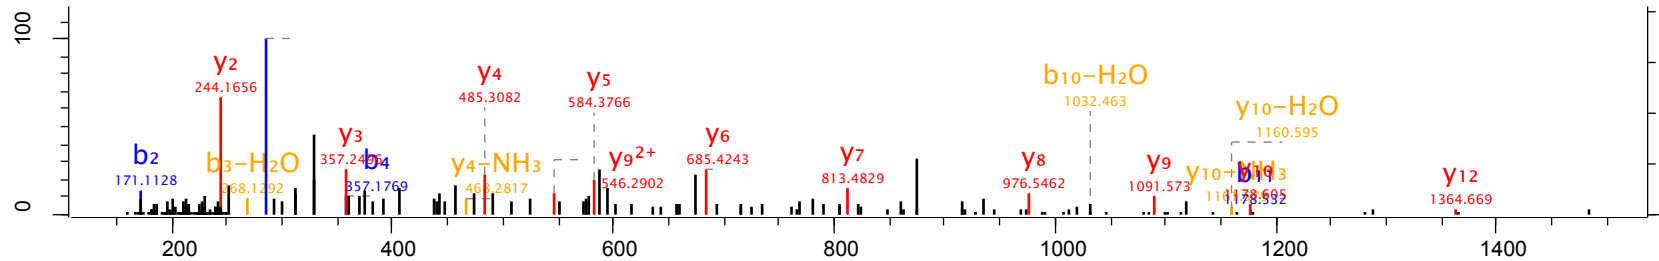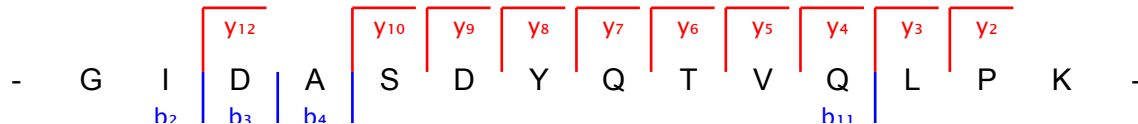

Raw file

20140925\_fract13\_dyn\_5ul\_C5\_01\_448

Scan

22975

Method

TOF; CID

Score

100.76

m/z

811.39

Gene names

ZDHHC2

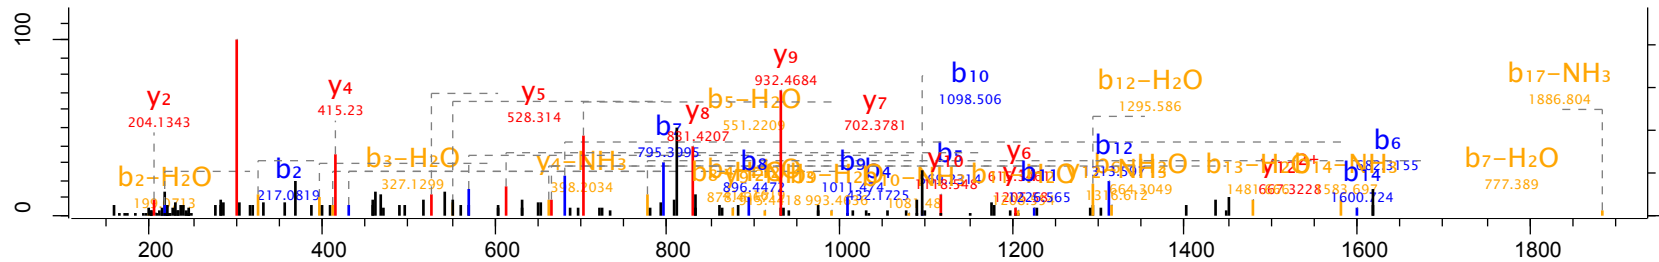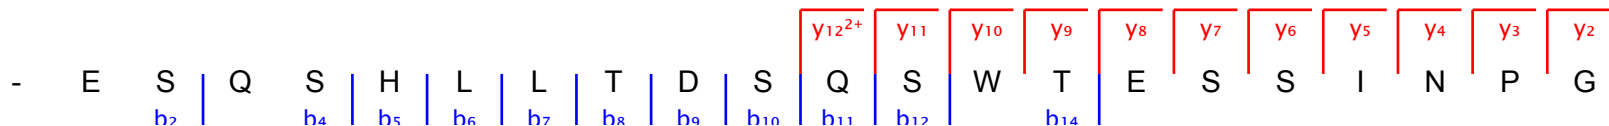

Raw file

20140925\_fract13\_dyn\_5ul\_C5\_01\_448

Scan

23106

Method

TOF; CID

Score

56.37

m/z

773.85

Gene names

TM2D2

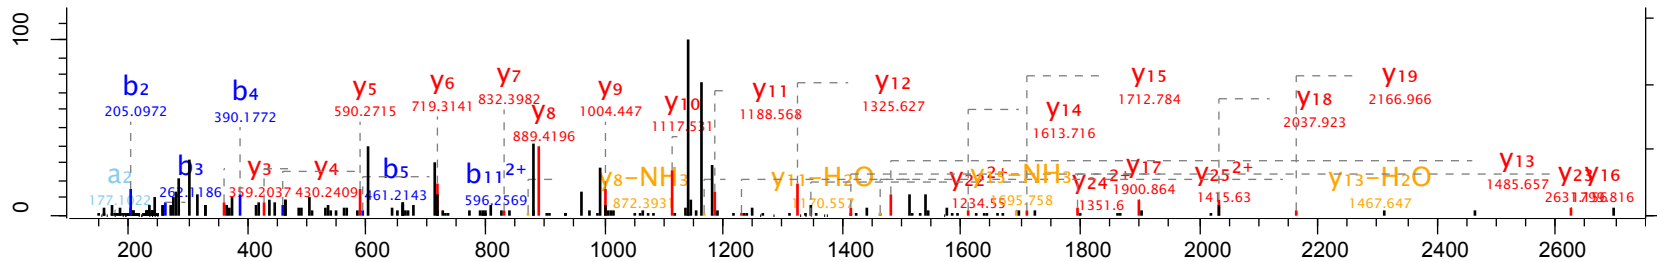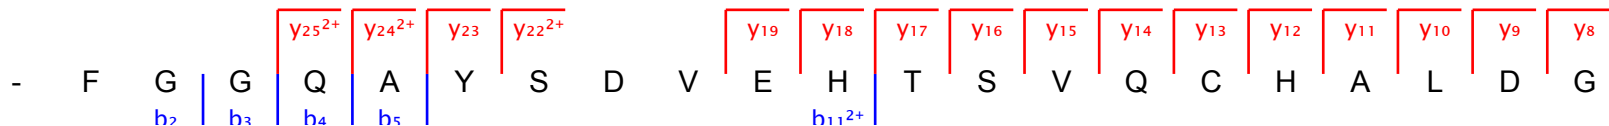

Raw file

20140925\_fract13\_dyn\_5ul\_C5\_01\_448

Scan

26681

Method

TOF; CID

Score

61.11

m/z

580.32

Gene names

GADD45A

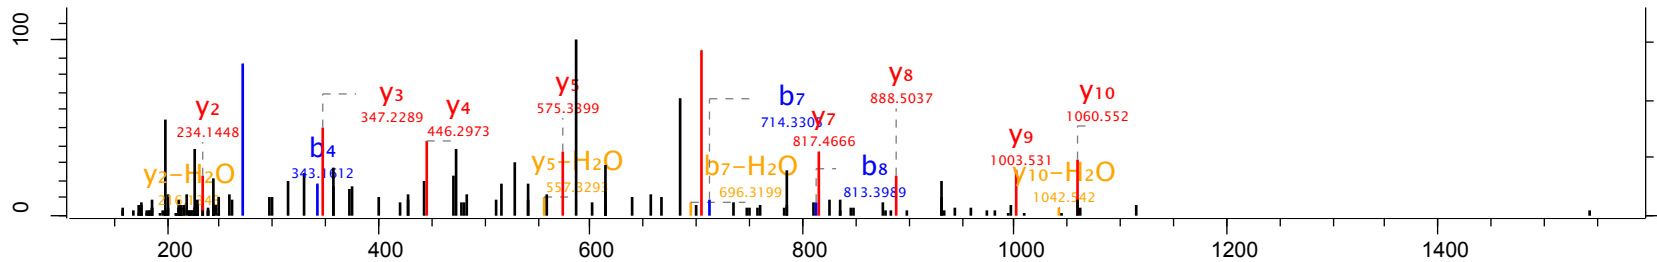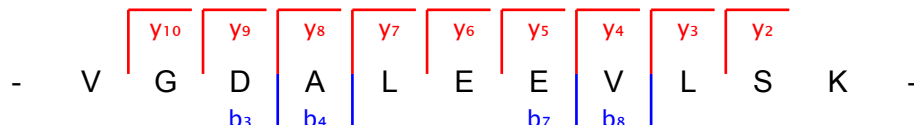



Raw file

20140925\_fract13\_dyn\_5ul\_C5\_01\_448

Scan

28201

Method

TOF; CID

Score

110.6

m/z

1001.49

Gene names

PSEN1

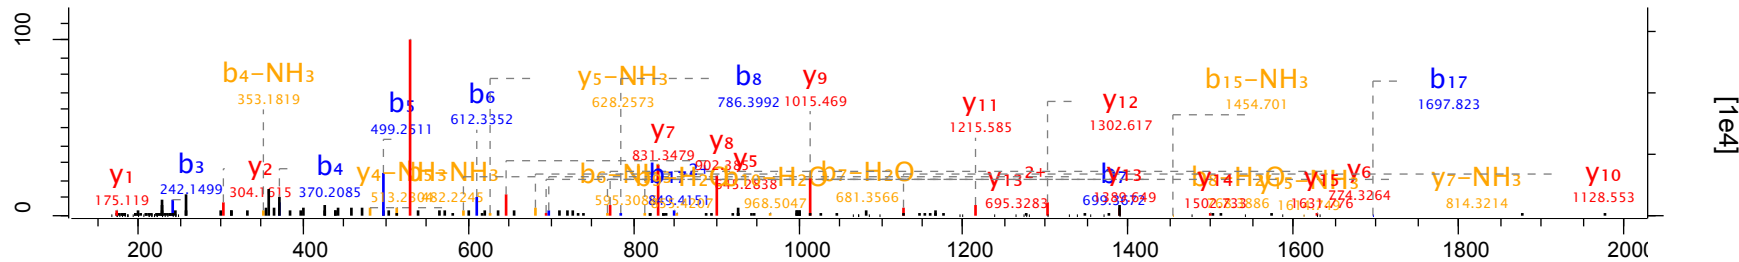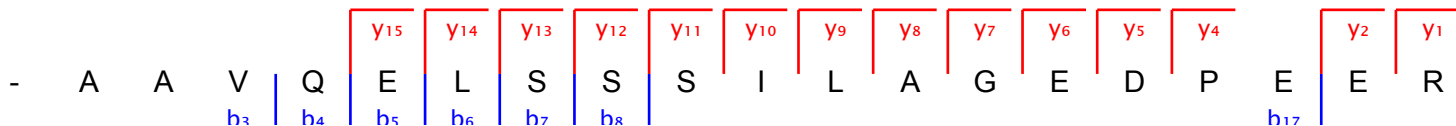

Raw file

20140925\_fract13\_dyn\_5ul\_C5\_01\_448

Scan

32763

Method

TOF; CID

Score

111.94

m/z

512.94

Gene names

TMCO3

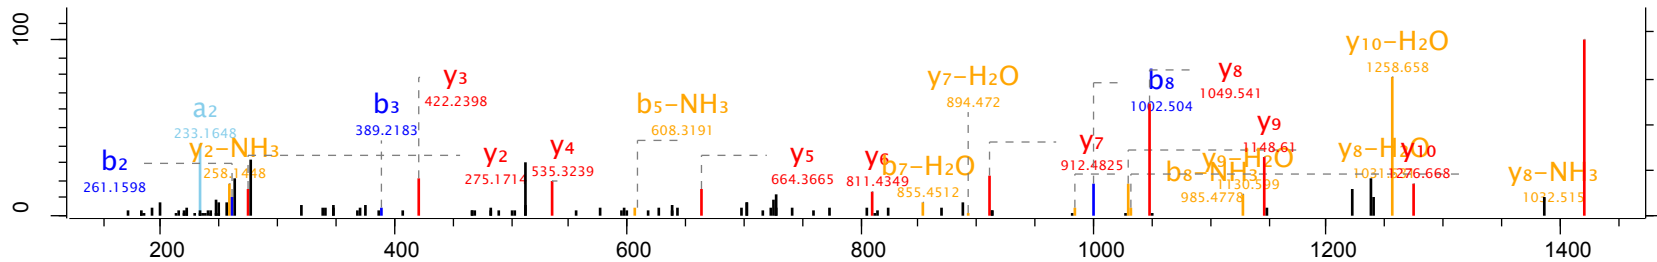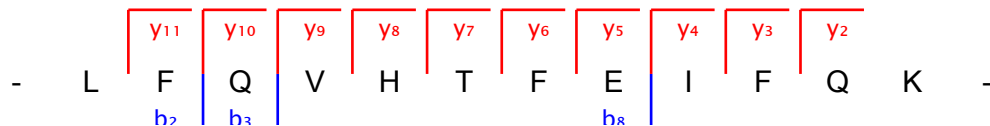

Raw file

20140925\_fract13\_dyn\_5ul\_C5\_01\_448

Scan

33950

Method

TOF; CID

Score

57.61

m/z

1025.83

Gene names

CERK

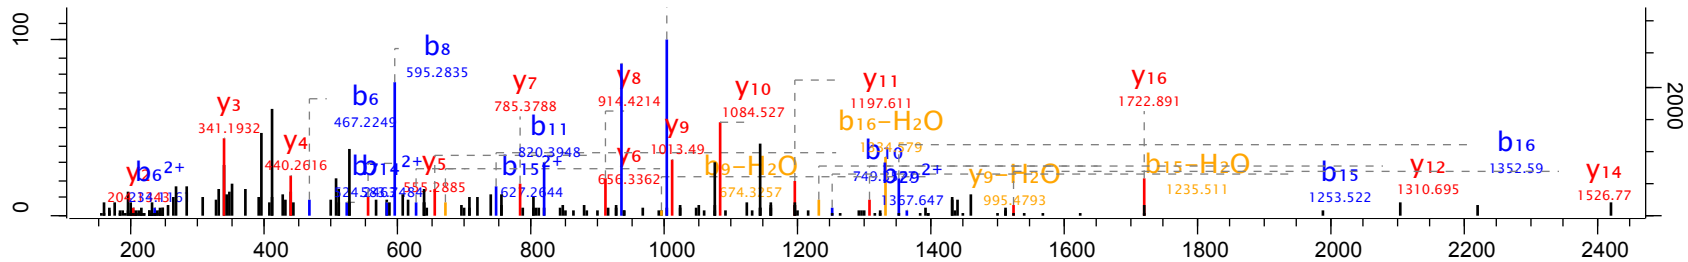

- S P G P G A G A P G A D A C S V P V S E I

$b_6$  |  $b_7$  |  $b_8$  |  $b_{10}$  |  $b_{11}$  |  $b_{12}$  |  $b_{13}$  |  $b_{14}^{2+}$  |  $b_{15}$  |  $b_{16}$

$y_{16}$  |  $y_{14}$  |  $y_{12}$

| Raw file                           | Scan  | Method   | Score | m/z    | Gene names |
|------------------------------------|-------|----------|-------|--------|------------|
| 20140925_fract13_dyn_5ul_C5_01_448 | 34168 | TOF; CID | 57.11 | 499.94 | METTL4     |

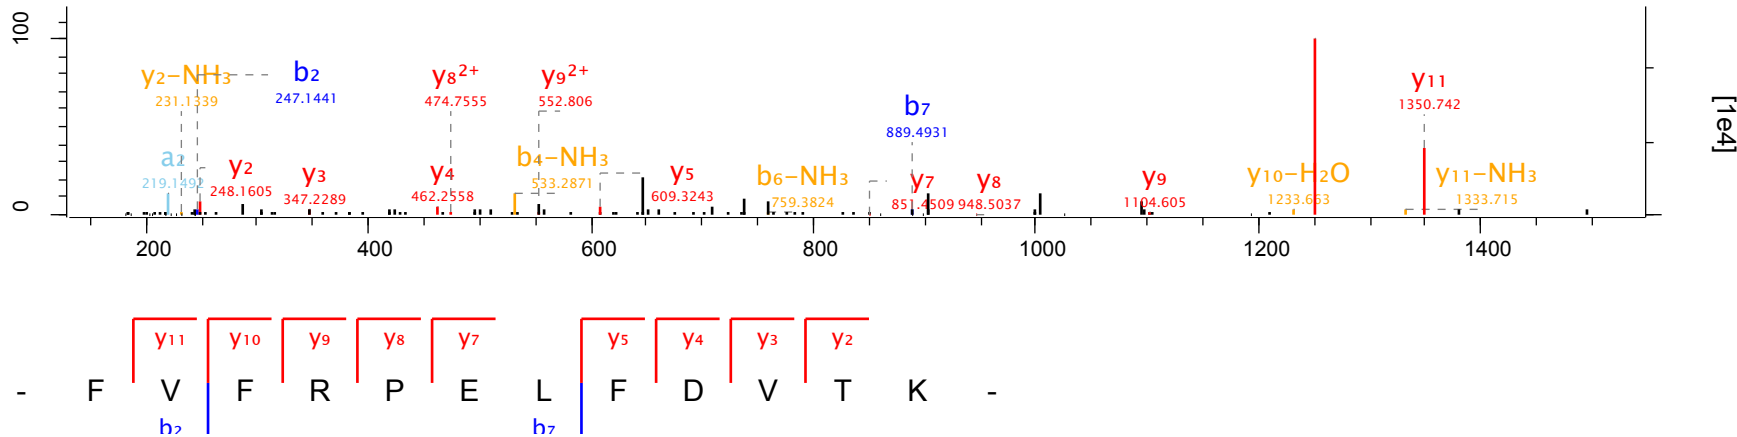

Raw file

20140925\_fract13\_dyn\_5ul\_C5\_01\_448

Scan

36002

Method

TOF; CID

Score

51.94

m/z

799.92

Gene names

SLC8B1

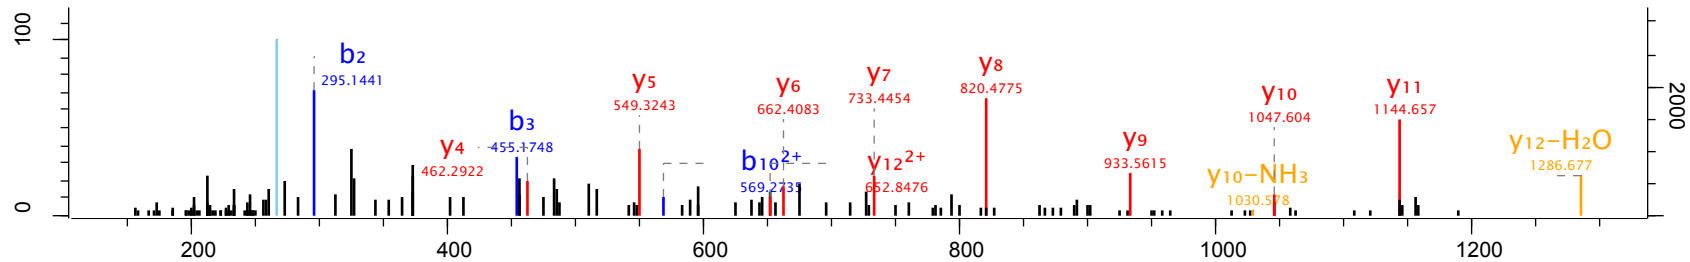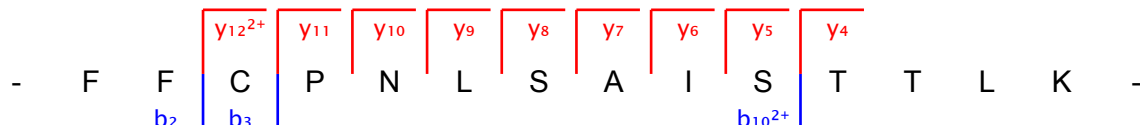

| Raw file                           | Scan  | Method   | Score | m/z    | Gene names |
|------------------------------------|-------|----------|-------|--------|------------|
| 20140925_fract13_dyn_5ul_C5_01_448 | 36368 | TOF; CID | 68.75 | 879.92 | TPM4       |

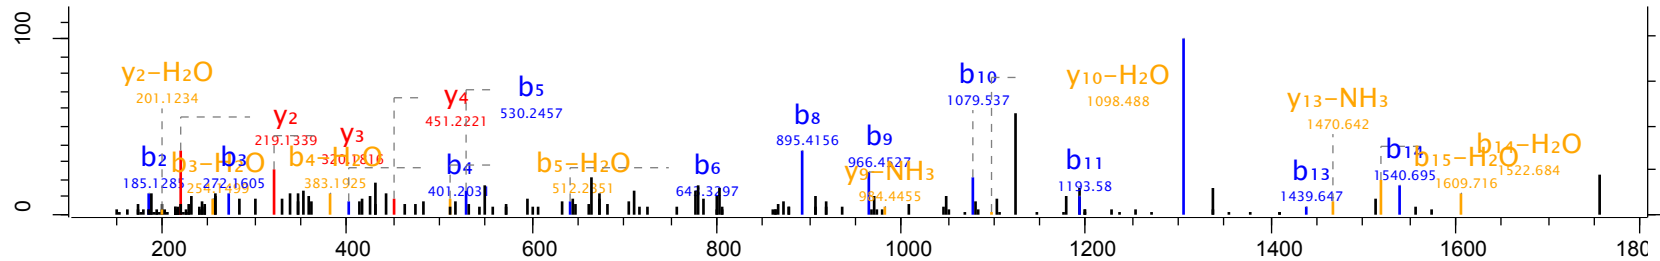

- A I S E E L D H A L N D M T S L -

b<sub>2</sub> | b<sub>3</sub> | b<sub>4</sub> | b<sub>5</sub> | b<sub>6</sub> | b<sub>8</sub> | b<sub>9</sub> | b<sub>10</sub> | b<sub>11</sub> | b<sub>12</sub> | b<sub>13</sub> | b<sub>14</sub> | y<sub>4</sub> | y<sub>3</sub> | y<sub>2</sub>

Raw file

20140925\_fract14\_dyn\_5ul\_C6\_01\_449

Scan

8085

Method

TOF; CID

Score

68

m/z

521.27

Gene names

GDF11

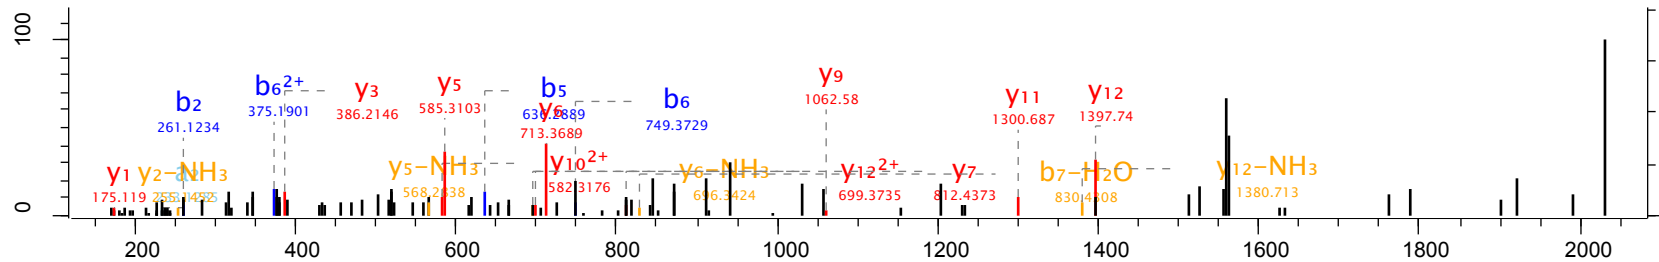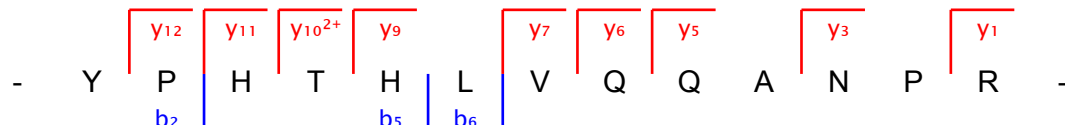

Raw file

20140925\_fract14\_dyn\_5ul\_C6\_01\_449

Scan

9765

Method

TOF; CID

Score

48.9

m/z

814.41

Gene names

BNIP3L

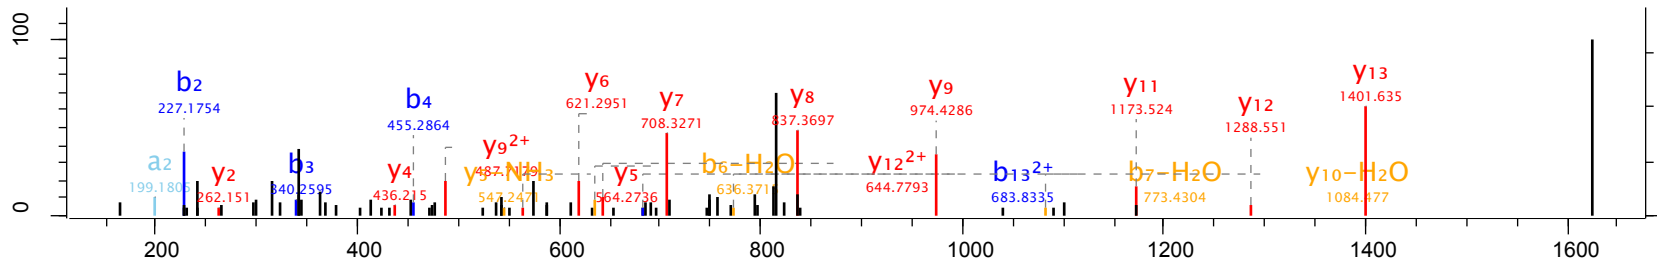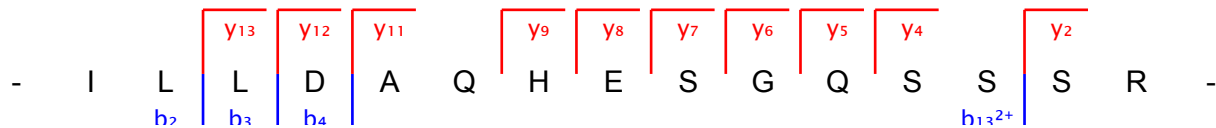



| Raw file                           | Scan  | Method   | Score  | m/z    | Gene names |
|------------------------------------|-------|----------|--------|--------|------------|
| 20140925_fract14_dyn_5ul_C6_01_449 | 11023 | TOF; CID | 102.51 | 467.26 | GARS       |

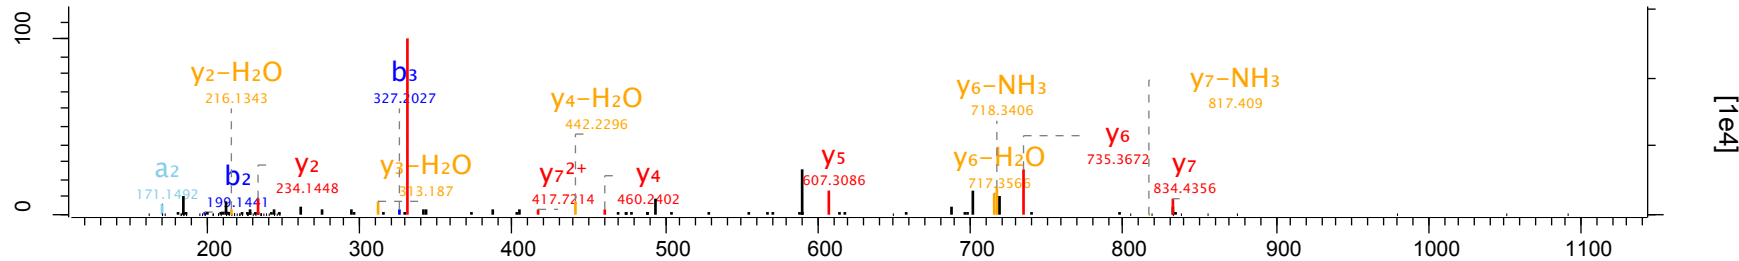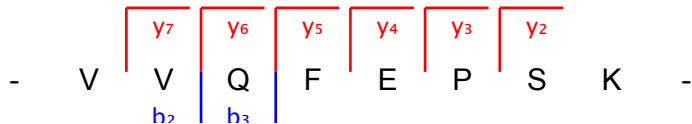

Raw file

20140925\_fract14\_dyn\_5ul\_C6\_01\_449

Scan

12538

Method

TOF; CID

Score

98.9

m/z

430.91

Gene names

DPY19L3

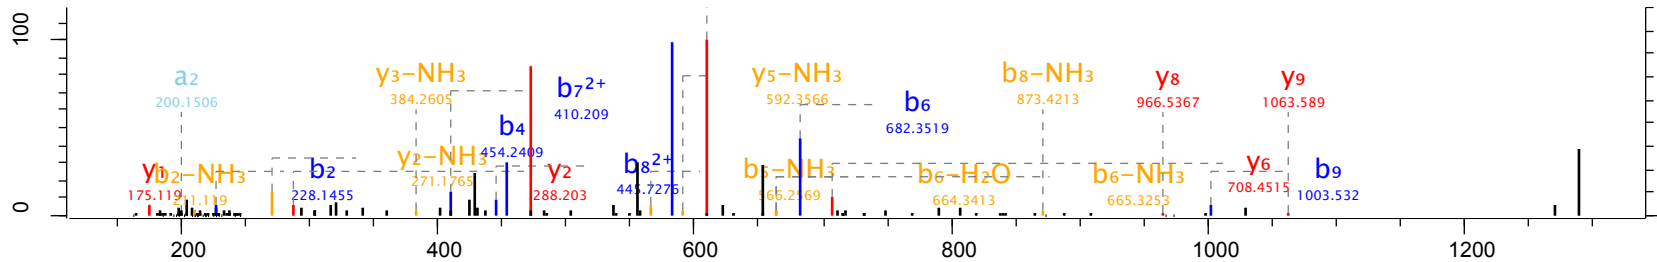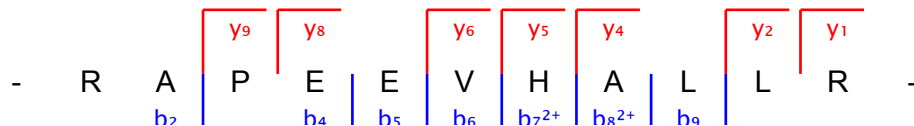

| Raw file                           | Scan  | Method   | Score | m/z    | Gene names |
|------------------------------------|-------|----------|-------|--------|------------|
| 20140925_fract14_dyn_5ul_C6_01_449 | 15984 | TOF; CID | 59.71 | 540.28 | SLC25A36   |

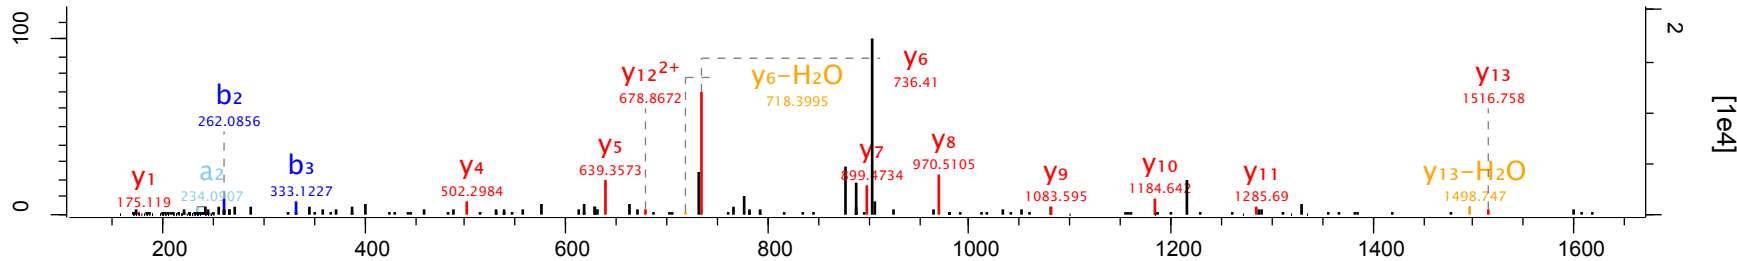

Sequence alignment showing the peptide sequence: T C A T T I A Y P H E V V R. The sequence is annotated with b and y ions. The b ions are labeled b<sub>2</sub> (under C) and b<sub>3</sub> (under A). The y ions are labeled y<sub>1</sub> through y<sub>13</sub> and y<sub>12</sub><sup>2+</sup>, corresponding to the amino acids C, A, T, T, I, A, Y, P, H, E, V, V, and R respectively. Red brackets above the sequence indicate the y ion fragmentation sites, and blue brackets below indicate the b ion fragmentation sites.

Raw file

20140925\_fract14\_dyn\_5ul\_C6\_01\_449

Scan

16427

Method

TOF; CID

Score

123.75

m/z

619.81

Gene names

PHF19

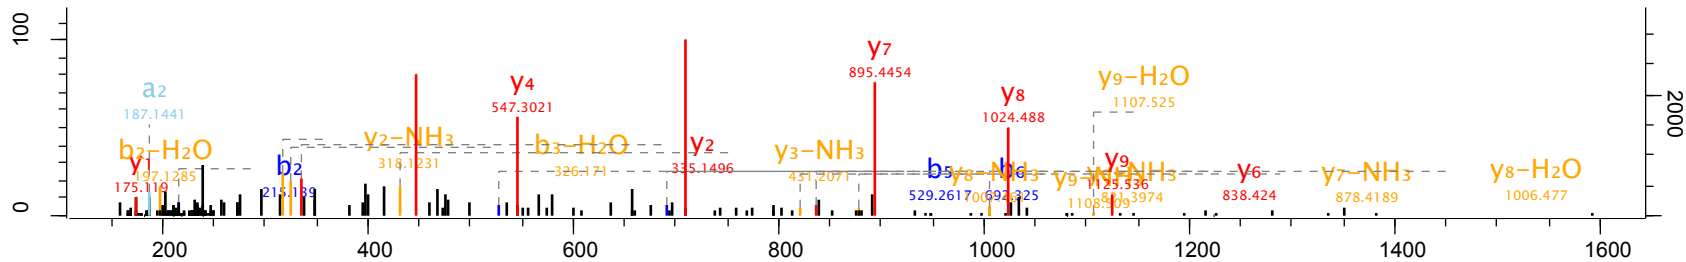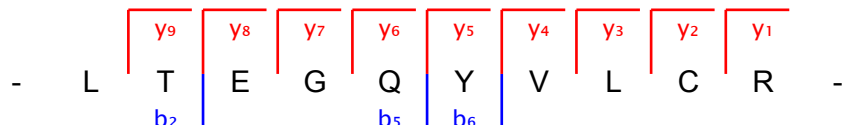

| Raw file                           | Scan  | Method   | Score  | m/z    | Gene names |
|------------------------------------|-------|----------|--------|--------|------------|
| 20140925_fract14_dyn_5ul_C6_01_449 | 18034 | TOF; CID | 140.14 | 587.78 | MAX        |

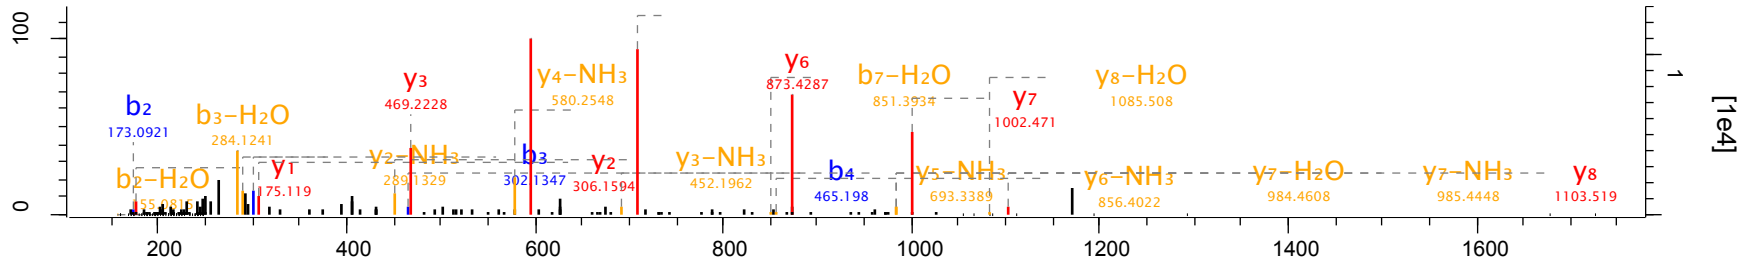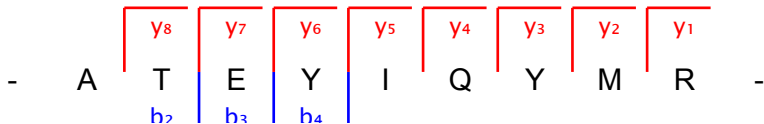

Raw file

Scan

Method

Score

m/z

Gene names

20140925\_fract14\_dyn\_5ul\_C6\_01\_449

22789

TOF; CID

112.44

786.41

NIPA1

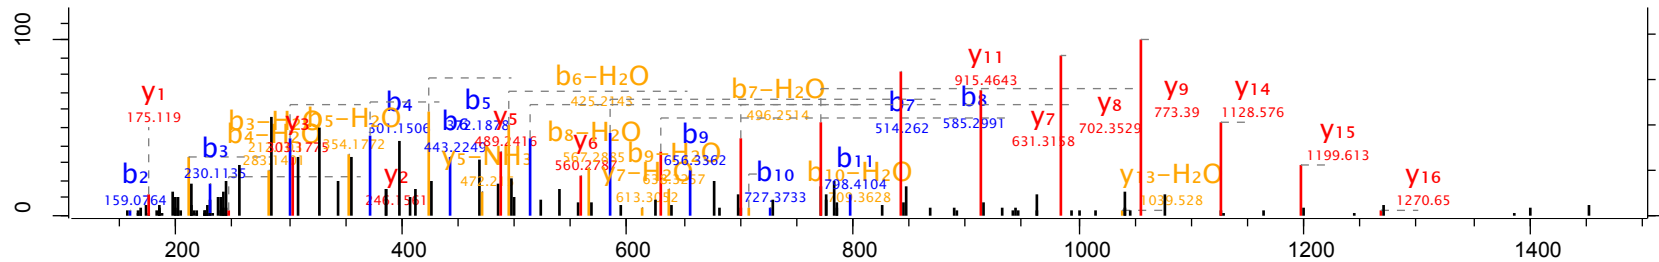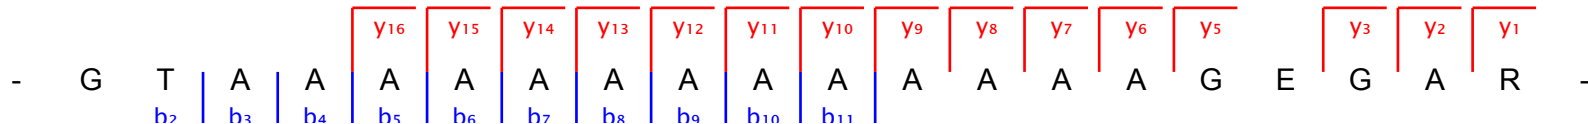

Raw file

20140925\_fract14\_dyn\_5ul\_C6\_01\_449

Scan

23576

Method

TOF; CID

Score

129.82

m/z

627.31

Gene names

KIAA1161

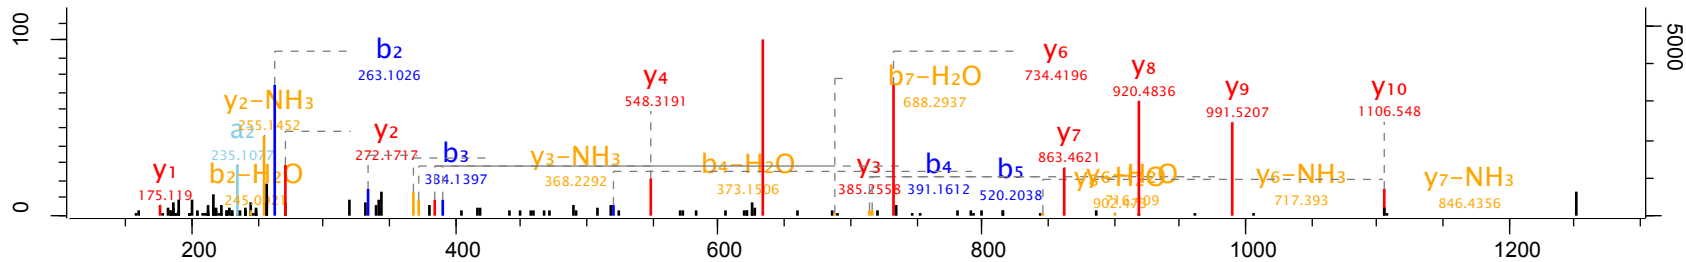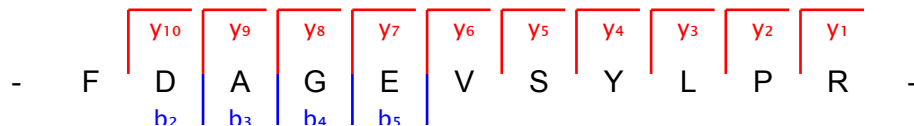

Raw file

20140925\_fract14\_dyn\_5ul\_C6\_01\_449

Scan

24817

Method

TOF; CID

Score

160.47

m/z

929.48

Gene names

HIATL1

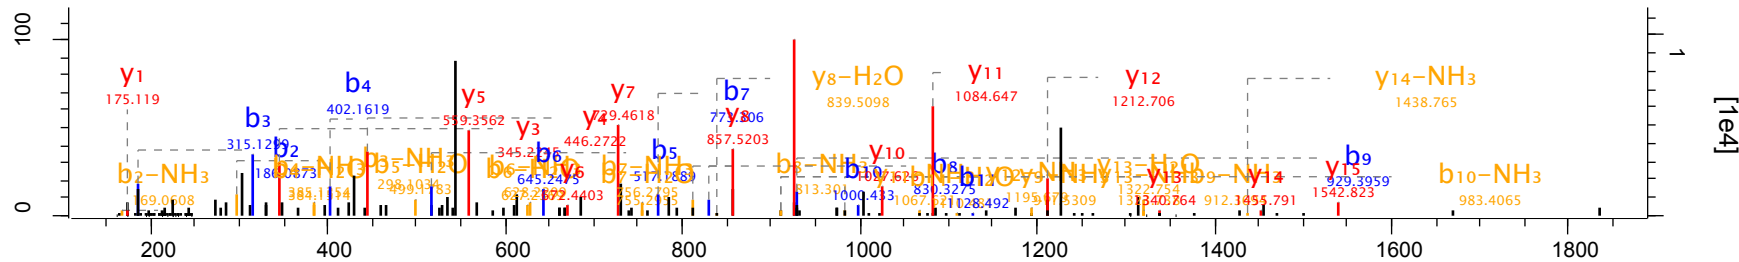

- N A E S D Q Q G V A Q G I I T G I R -

b<sub>2</sub> | b<sub>3</sub> | b<sub>4</sub> | b<sub>5</sub> | b<sub>6</sub> | b<sub>7</sub> | b<sub>8</sub> | b<sub>9</sub> | b<sub>10</sub> | b<sub>11</sub>

y<sub>15</sub> | y<sub>14</sub> | y<sub>13</sub> | y<sub>12</sub> | y<sub>11</sub> | y<sub>10</sub> | y<sub>9</sub> | y<sub>8</sub> | y<sub>7</sub> | y<sub>6</sub> | y<sub>5</sub> | y<sub>4</sub> | y<sub>3</sub> | y<sub>1</sub>



| Raw file                           | Scan  | Method   | Score  | m/z    | Gene names |
|------------------------------------|-------|----------|--------|--------|------------|
| 20140925_fract14_dyn_5ul_C6_01_449 | 25068 | TOF; CID | 104.42 | 546.29 | D2HGDH     |

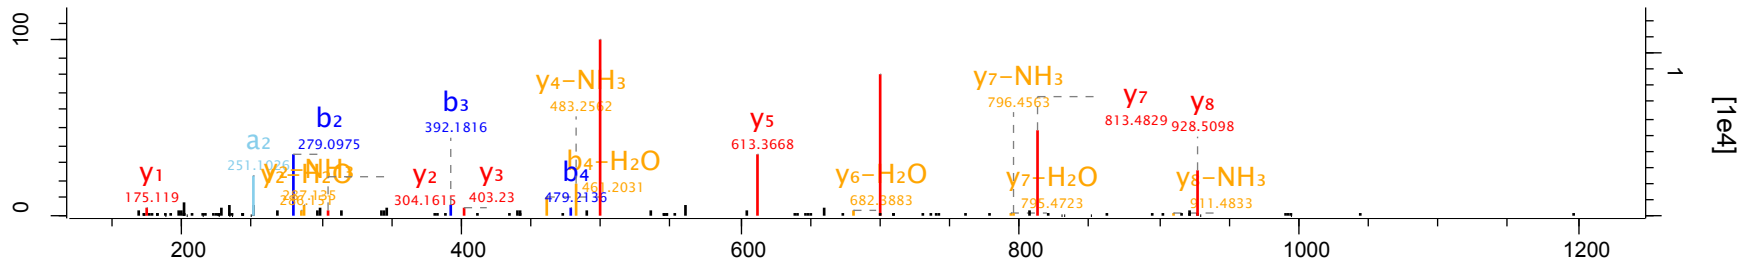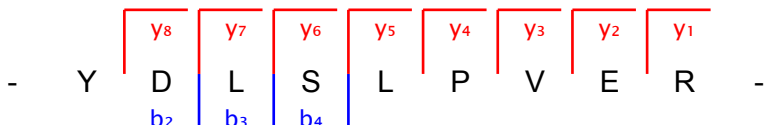

Raw file

20140925\_fract14\_dyn\_5ul\_C6\_01\_449

Scan

25542

Method

TOF; CID

Score

66.07

m/z

655

Gene names

IFT172

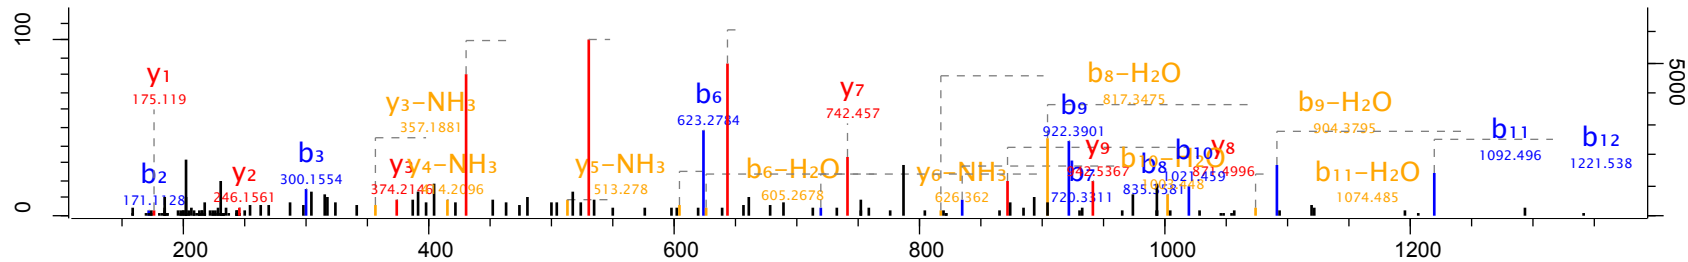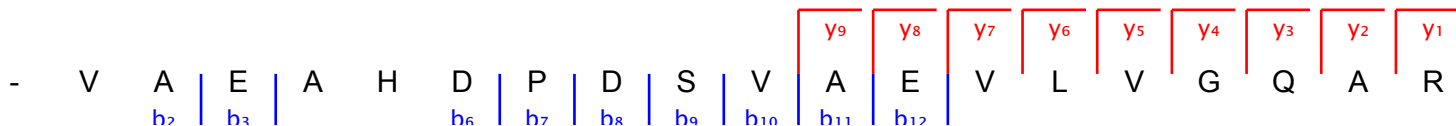

Raw file

20140925\_fract14\_dyn\_5ul\_C6\_01\_449

Scan

25600

Method

TOF; CID

Score

74.99

m/z

672.36

Gene names

SPATA13

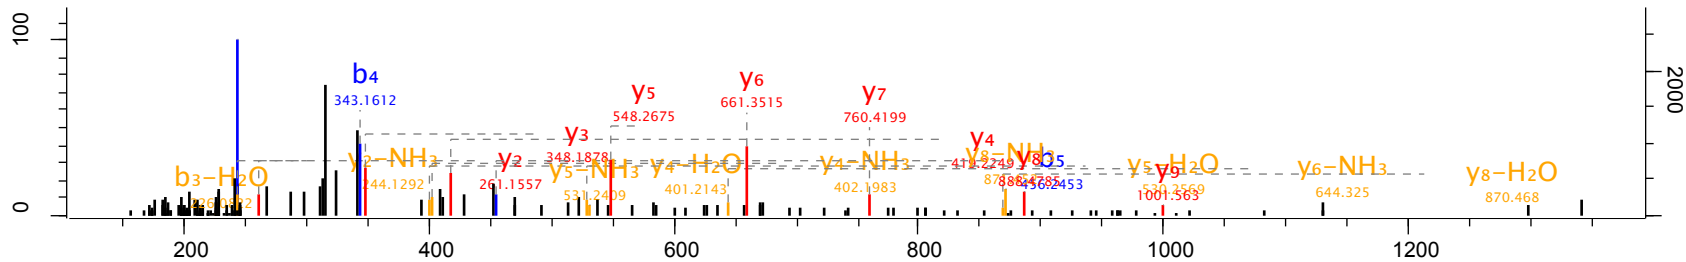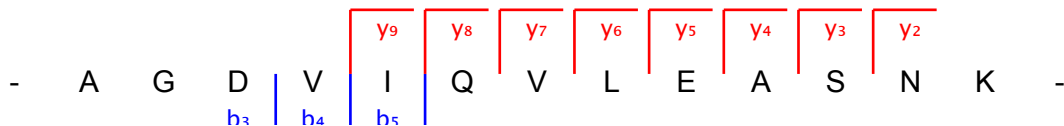

Raw file

Scan

Method

Score

m/z

Gene names

20140925\_fract14\_dyn\_5ul\_C6\_01\_449

27929

TOF; CID

125.82

575.3

JOSD1

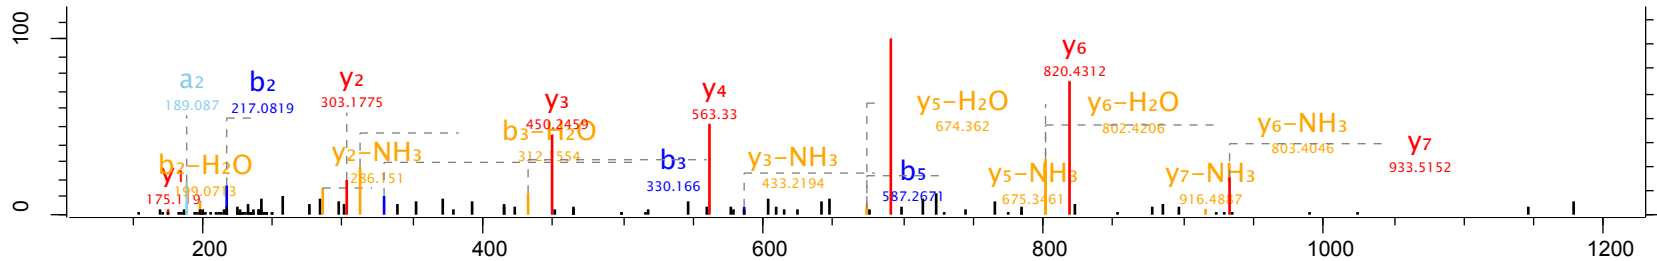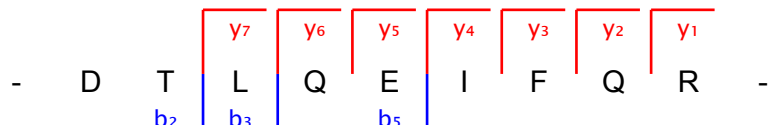

Raw file

Scan

Method

Score

m/z

Gene names

20140925\_fract14\_dyn\_5ul\_C6\_01\_449

30669

TOF; CID

87.2

813.9

PAG1

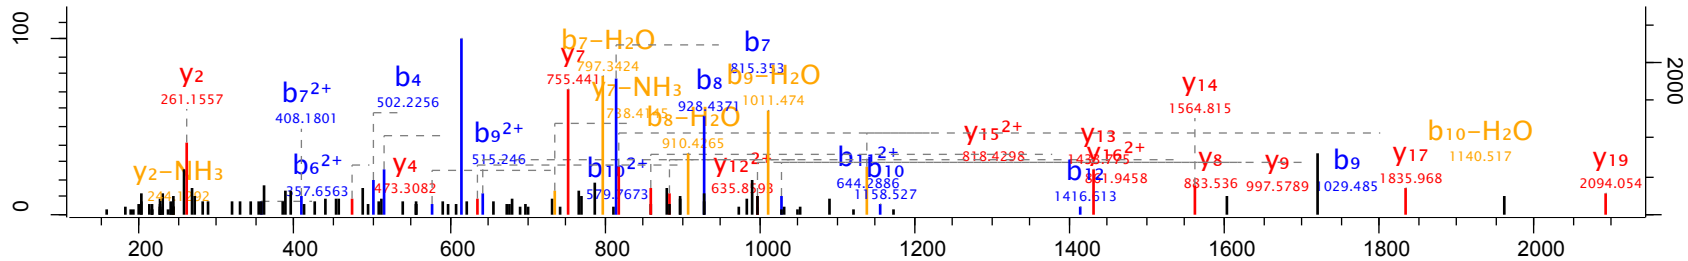

- S R E E | D | P | T | L | T | E | E | I | S | A | M | Y | S | S | V | N

h<sub>4</sub> | h<sub>5</sub> | h<sub>6</sub><sup>2+</sup> | h<sub>7</sub> | h<sub>8</sub> | h<sub>9</sub> | h<sub>10</sub> | h<sub>11</sub><sup>2+</sup> | h<sub>12</sub> | y<sub>19</sub> | y<sub>17</sub> | y<sub>16</sub><sup>2+</sup> | y<sub>15</sub><sup>2+</sup> | y<sub>14</sub> | y<sub>13</sub> | y<sub>12</sub><sup>2+</sup> | y<sub>9</sub>

Raw file

Scan

Method

Score

m/z

Gene names

20140925\_fract14\_dyn\_5ul\_C6\_01\_449

31563

TOF; CID

106.14

856.38

MSANTD4

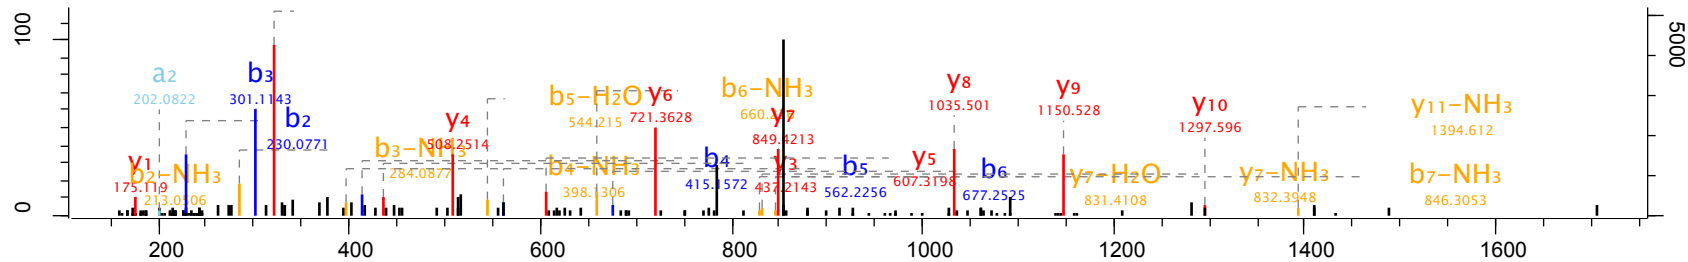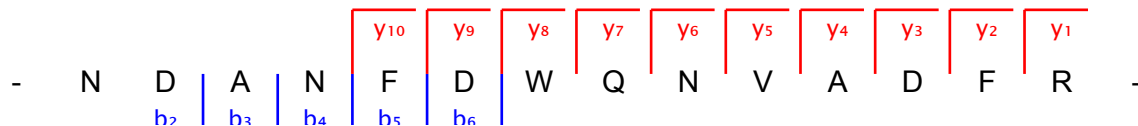

Raw file

20140925\_fract14\_dyn\_5ul\_C6\_01\_449

Scan

33308

Method

TOF; CID

Score

66.81

m/z

646.35

Gene names

NFE2L2

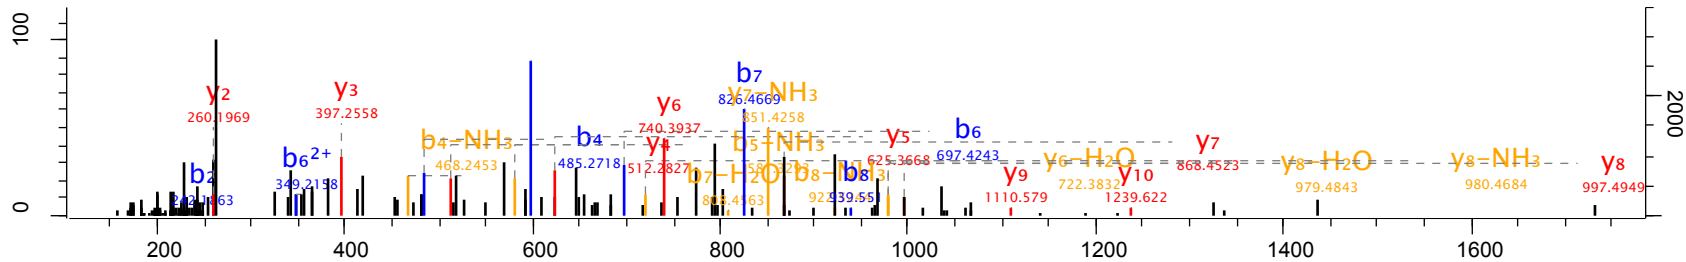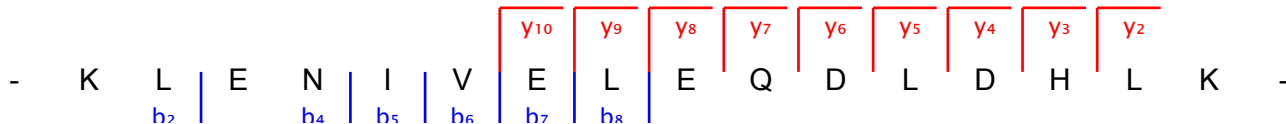

Raw file

20140925\_fract14\_dyn\_5ul\_C6\_01\_449

Scan

37146

Method

TOF; CID

Score

94.77

m/z

588.36

Gene names

KREMEN2

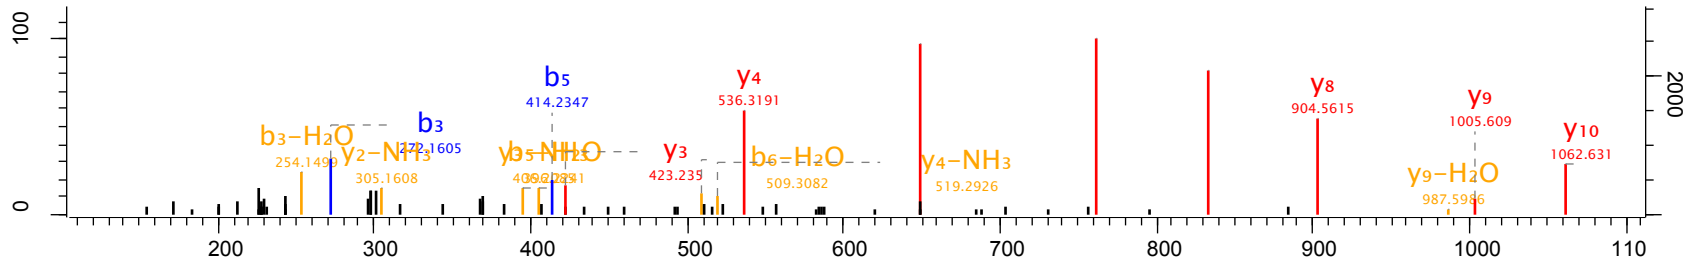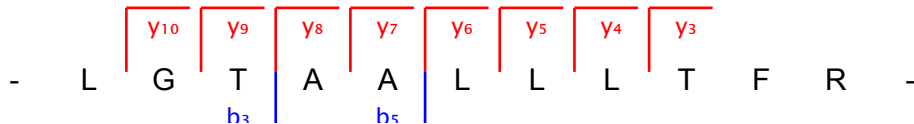



Raw file

20140925\_fract14\_dyn\_5ul\_C6\_01\_449

Scan

38602

Method

TOF; CID

Score

128.74

m/z

620.02

Gene names

GIPC2

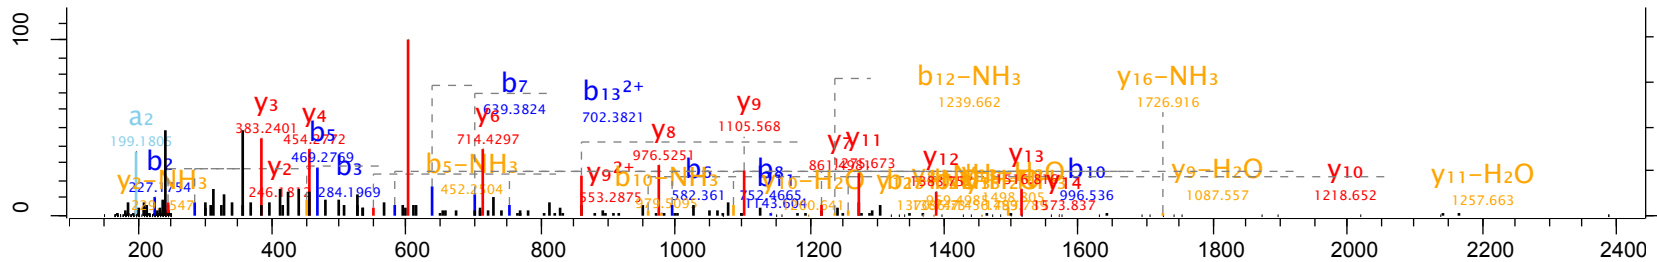

[1e4]

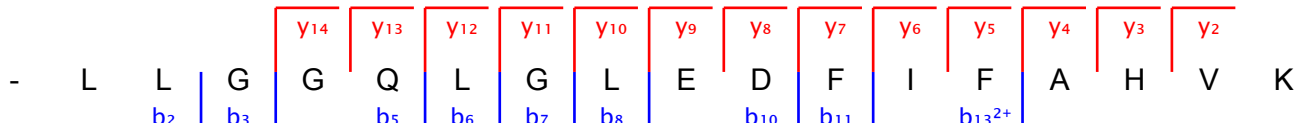

| Raw file                           | Scan | Method   | Score | m/z    | Gene names |
|------------------------------------|------|----------|-------|--------|------------|
| 20140925_fract15_dyn_5ul_C7_01_450 | 5331 | TOF; CID | 78.55 | 519.94 | ZNF250     |

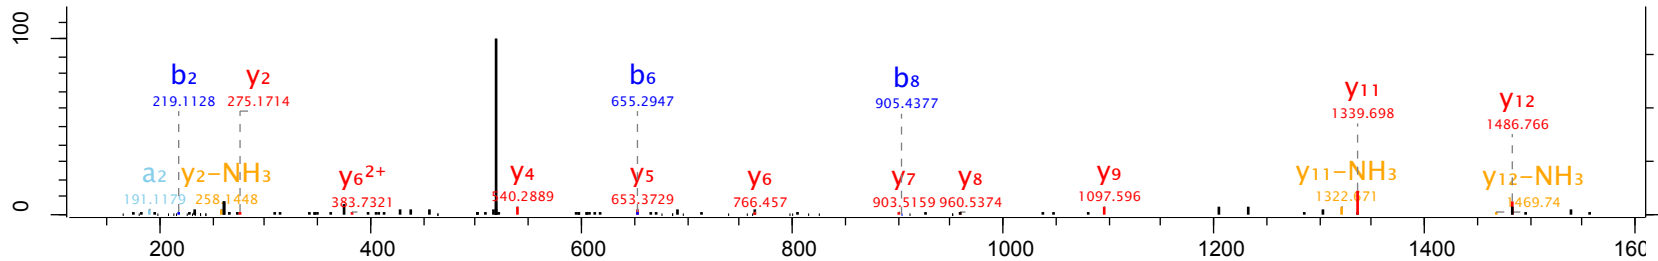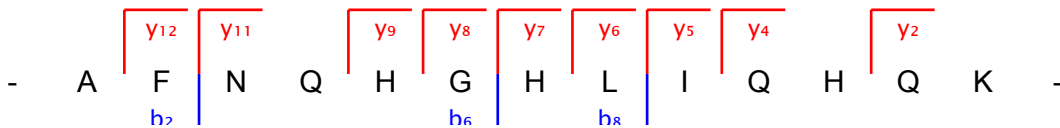

[1e4]

Raw file

Scan

Method

Score

m/z

Gene names

20140925\_fract15\_dyn\_5ul\_C7\_01\_450

6724

TOF; CID

72.68

417.22

SPATA33

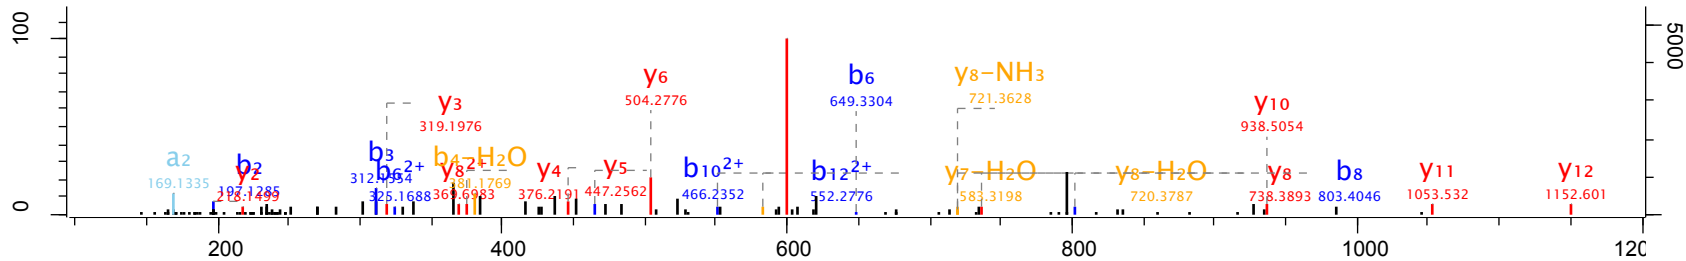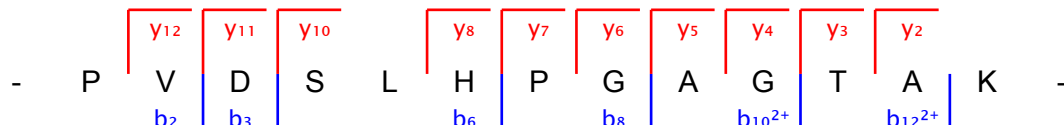

Raw file

20140925\_fract15\_dyn\_5ul\_C7\_01\_450

Scan

10271

Method

TOF; CID

Score

71.08

m/z

613.83

Gene names

TMC7

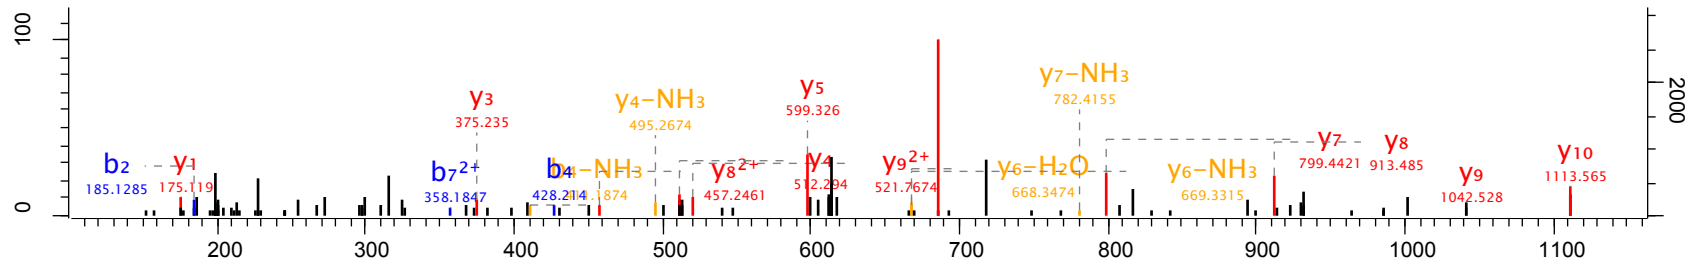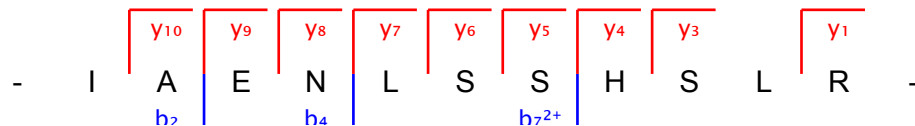

Raw file

20140925\_fract15\_dyn\_5ul\_C7\_01\_450

Scan

10433

Method

TOF; CID

Score

130.01

m/z

413.55

Gene names

BNIP3

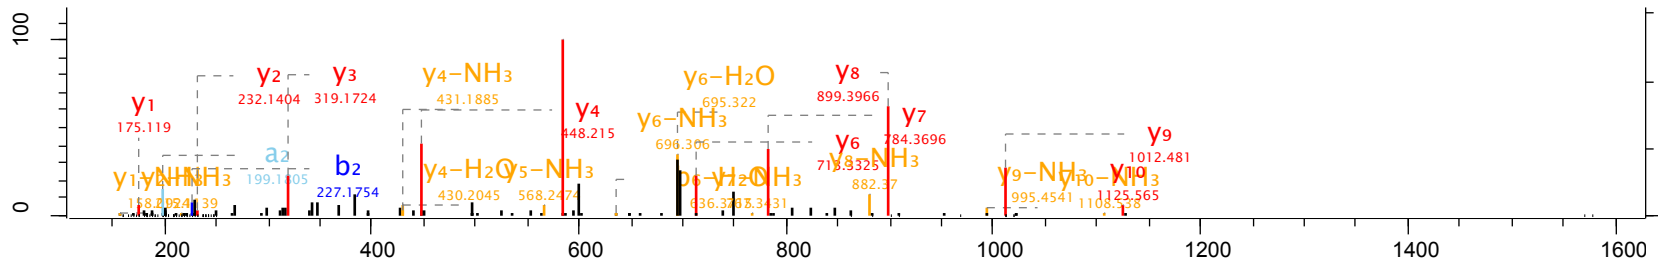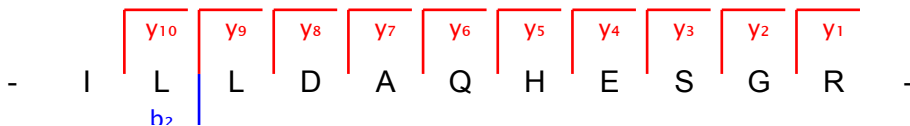

| Raw file                           | Scan  | Method   | Score | m/z    | Gene names |
|------------------------------------|-------|----------|-------|--------|------------|
| 20140925_fract15_dyn_5ul_C7_01_450 | 13702 | TOF; CID | 67.42 | 817.94 | FRAT2      |

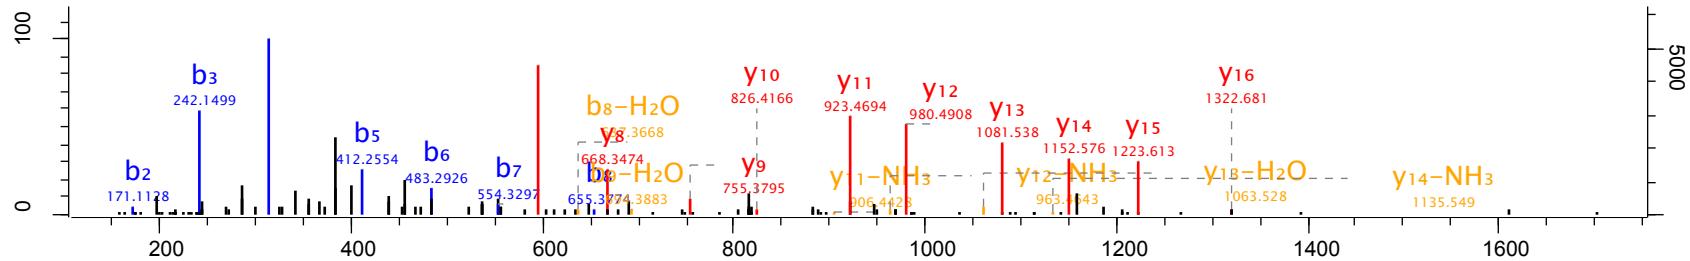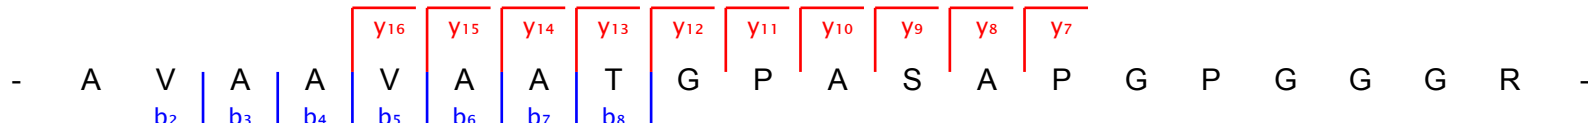

Raw file

20140925\_fract15\_dyn\_5ul\_C7\_01\_450

Scan

14929

Method

TOF; CID

Score

57.79

m/z

416.24

Gene names

GLDN

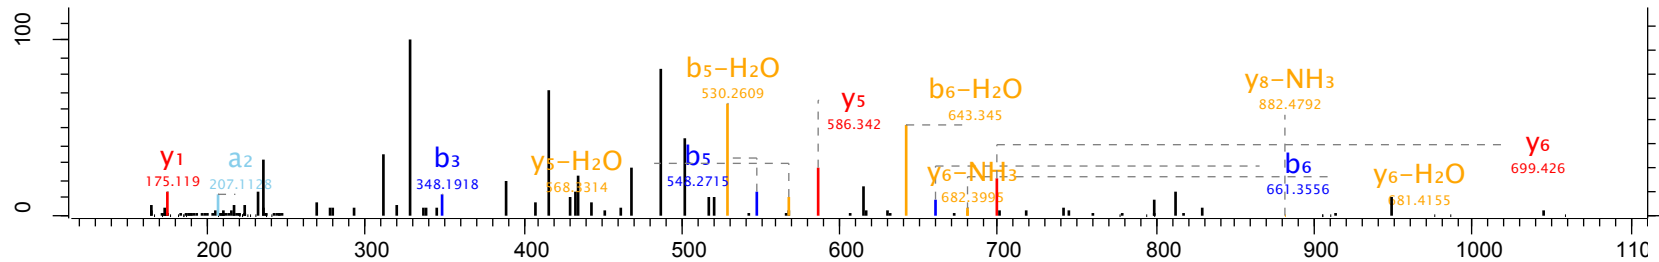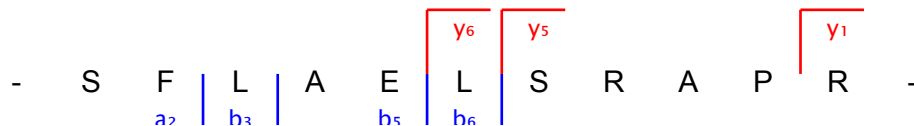

Raw file

20140925\_fract15\_dyn\_5ul\_C7\_01\_450

Scan

16618

Method

TOF; CID

Score

138.42

m/z

676.85

Gene names

SELK

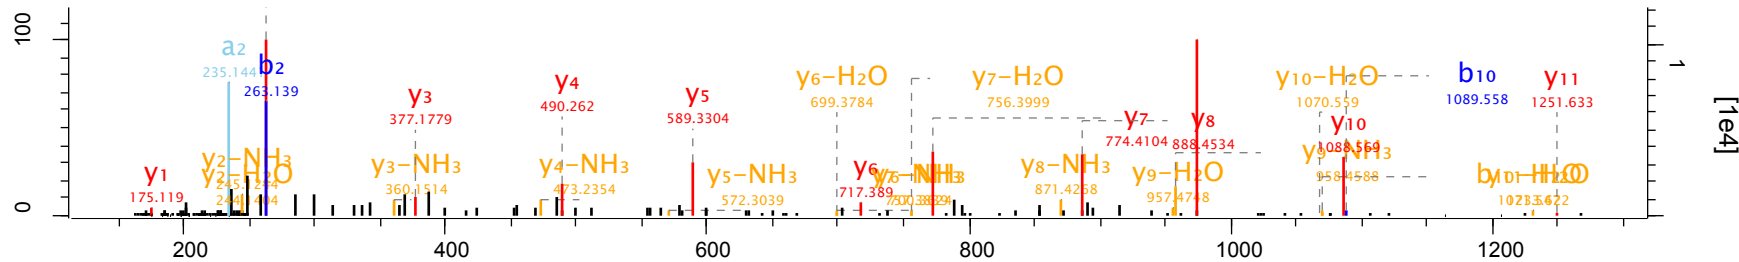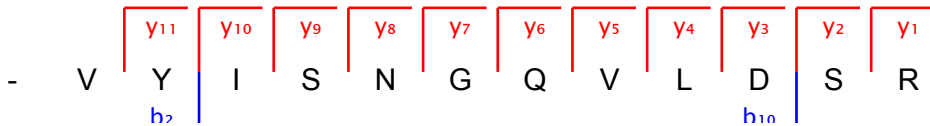



| Raw file                           | Scan  | Method   | Score | m/z    | Gene names |
|------------------------------------|-------|----------|-------|--------|------------|
| 20140925_fract15_dyn_5ul_C7_01_450 | 20476 | TOF; CID | 56.04 | 595.81 | TENM4      |

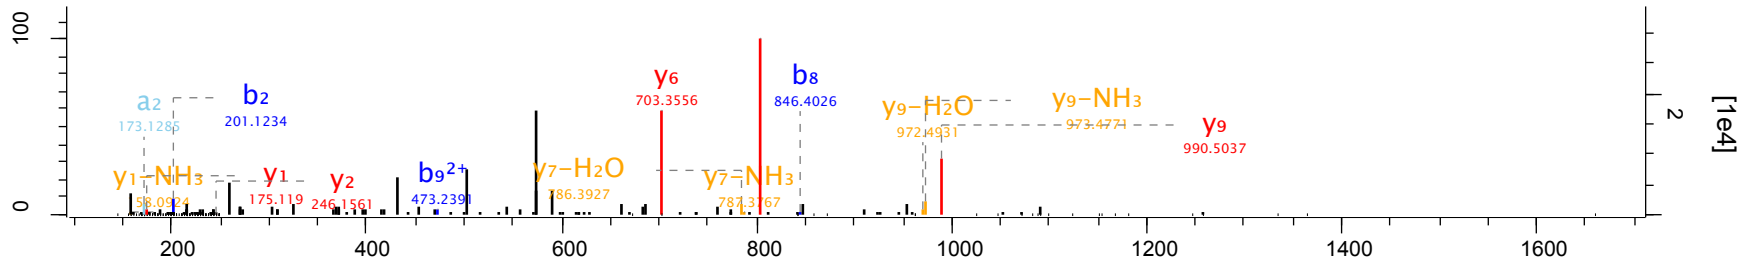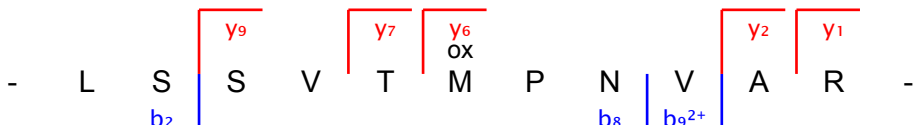

Raw file

20140925\_fract15\_dyn\_5ul\_C7\_01\_450

Scan

20604

Method

TOF; CID

Score

93.1

m/z

524.79

Gene names

COX7C

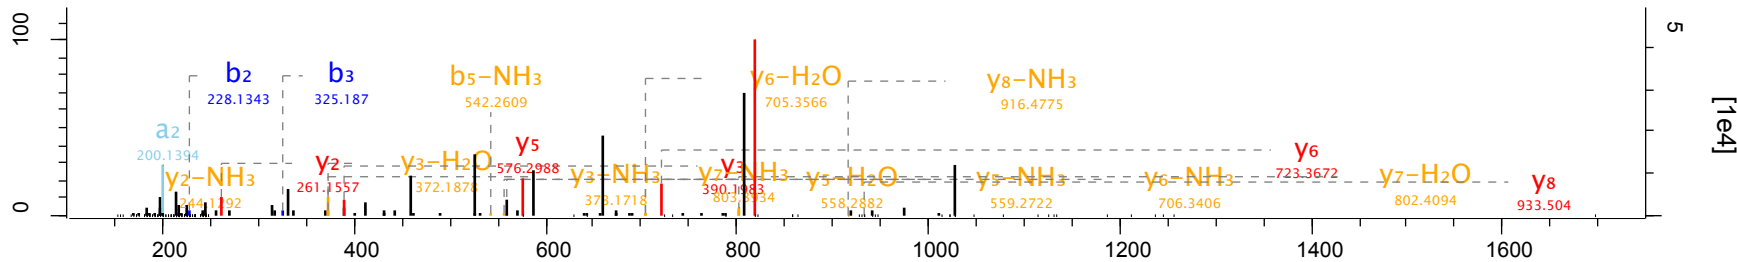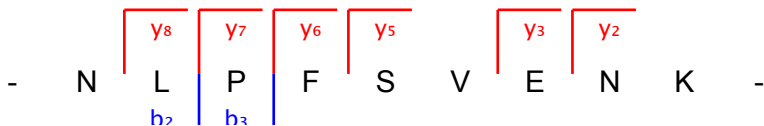

| Raw file                           | Scan  | Method   | Score | m/z    | Gene names |
|------------------------------------|-------|----------|-------|--------|------------|
| 20140925_fract15_dyn_5ul_C7_01_450 | 27155 | TOF; CID | 96.14 | 629.85 | C10orf90   |

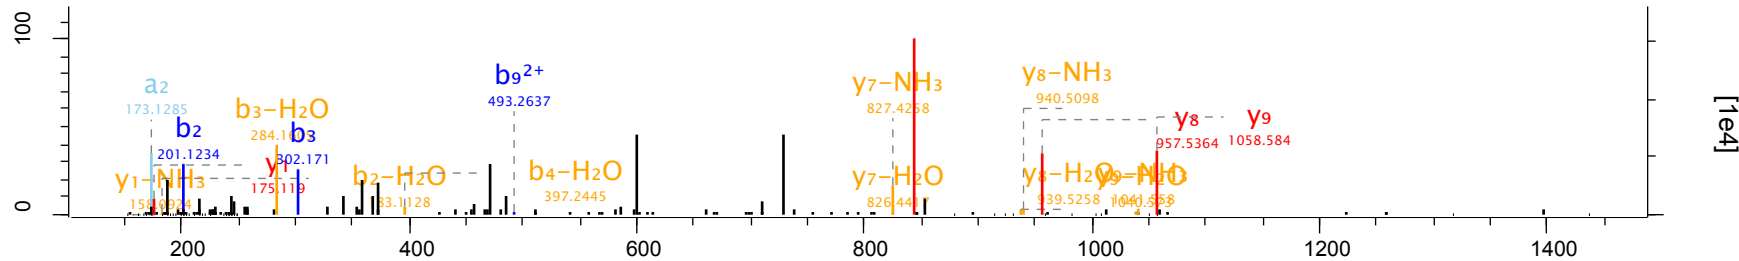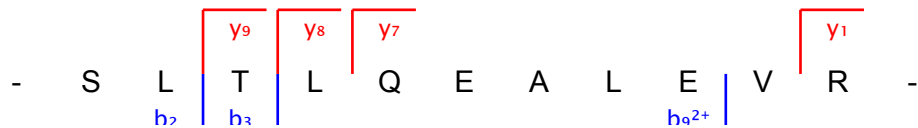

Raw file

20140925\_fract15\_dyn\_5ul\_C7\_01\_450

Scan

29844

Method

TOF; CID

Score

58.47

m/z

1009.43

Gene names

FAM199X

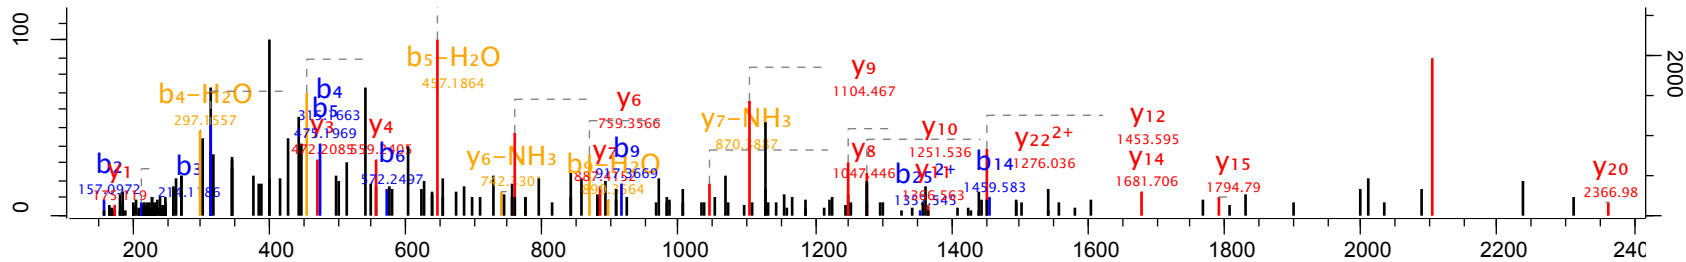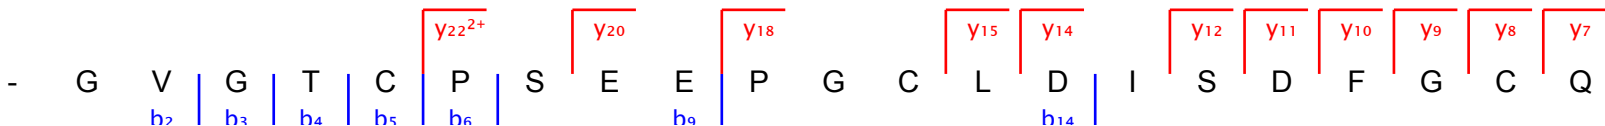

Raw file

Scan

Method

Score

m/z

Gene names

20140925\_fract15\_dyn\_5ul\_C7\_01\_450

34494

TOF; CID

99.04

935.51

VAMP1

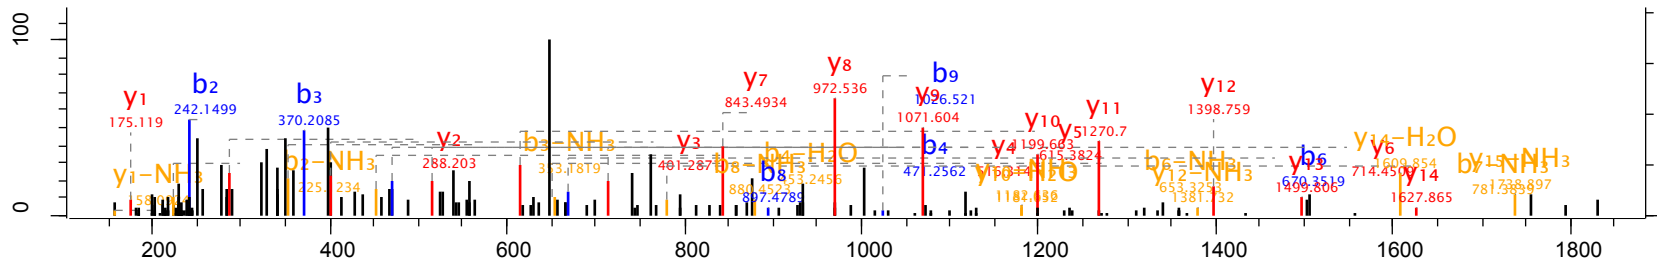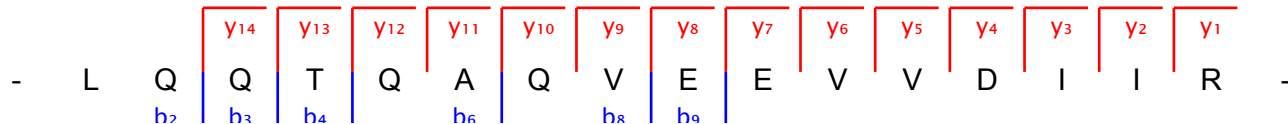

Raw file

20140925\_fract15\_dyn\_5ul\_C7\_01\_450

Scan

35763

Method

TOF; CID

Score

90.15

m/z

615.86

Gene names

ORAOV1

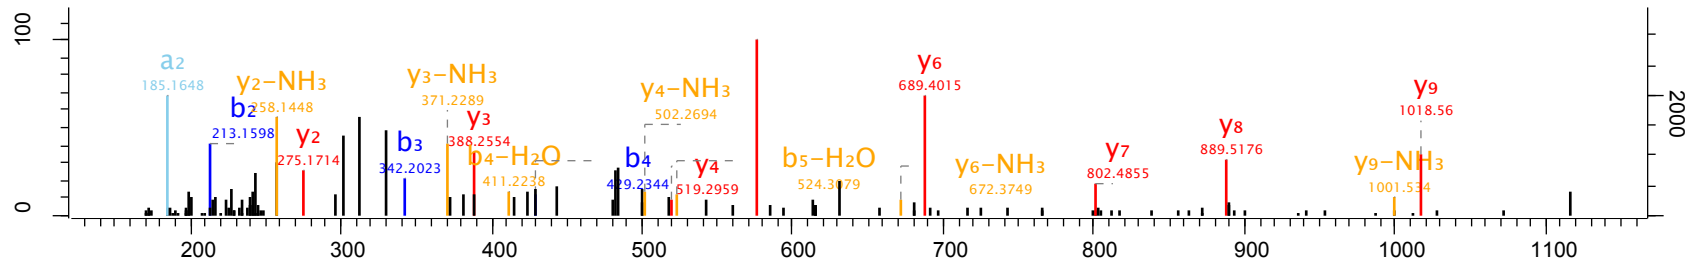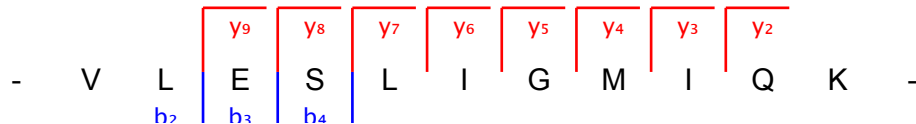

| Raw file                           | Scan  | Method   | Score  | m/z    | Gene names |
|------------------------------------|-------|----------|--------|--------|------------|
| 20140925_fract15_dyn_5ul_C7_01_450 | 36672 | TOF; CID | 143.46 | 908.43 | EPT1       |

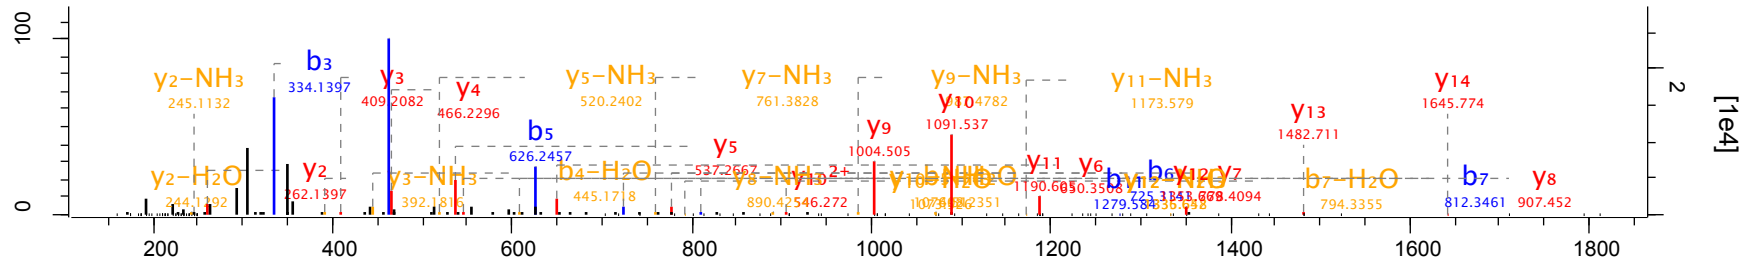

| ac | Y14 | Y13 | Y12            | Y11            | Y10            | Y9             | Y8             | Y7 | Y6 | Y5              | Y4 | Y3 | Y2 |   |   |   |   |
|----|-----|-----|----------------|----------------|----------------|----------------|----------------|----|----|-----------------|----|----|----|---|---|---|---|
| -  | A   | G   | Y              | E              | Y              | V              | S              | P  | E  | Q               | L  | A  | G  | F | D | K | - |
|    |     |     | b <sub>3</sub> | b <sub>4</sub> | b <sub>5</sub> | b <sub>6</sub> | b <sub>7</sub> |    |    | b <sub>11</sub> |    |    |    |   |   |   |   |

Raw file

20140925\_fract15\_dyn\_5ul\_C7\_01\_450

Scan

38479

Method

TOF; CID

Score

64.22

m/z

753.4

Gene names

UHMK1

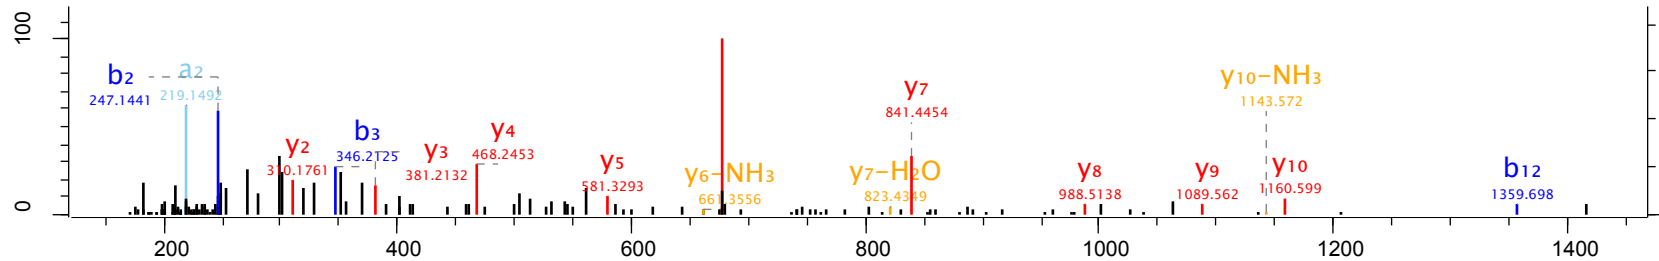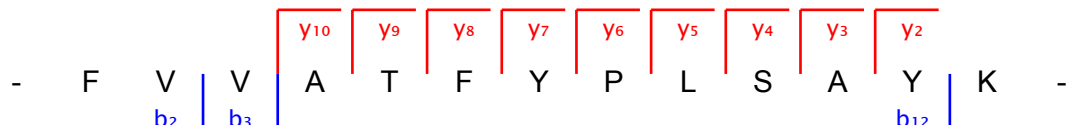



Raw file

20140925\_fract16\_dyn\_5ul\_C8\_01\_451

Scan

9528

Method

TOF; CID

Score

85.52

m/z

637.81

Gene names

FUNDC1

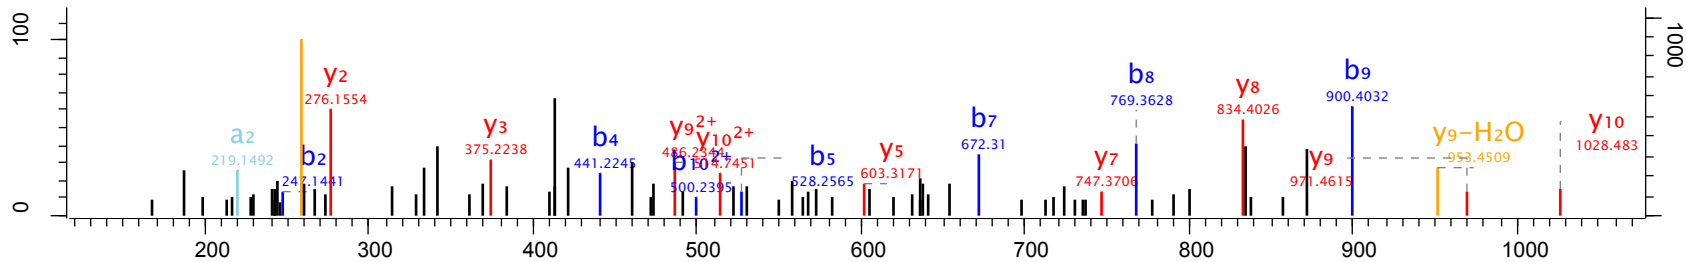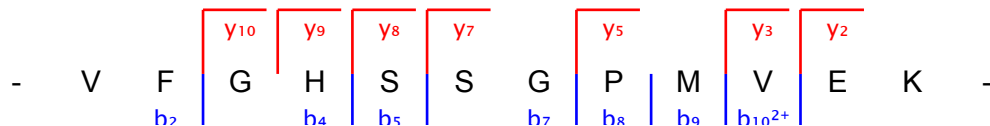

| Raw file                           | Scan  | Method   | Score  | m/z    | Gene names |
|------------------------------------|-------|----------|--------|--------|------------|
| 20140925_fract16_dyn_5ul_C8_01_451 | 14904 | TOF; CID | 113.93 | 631.79 | CRLS1      |

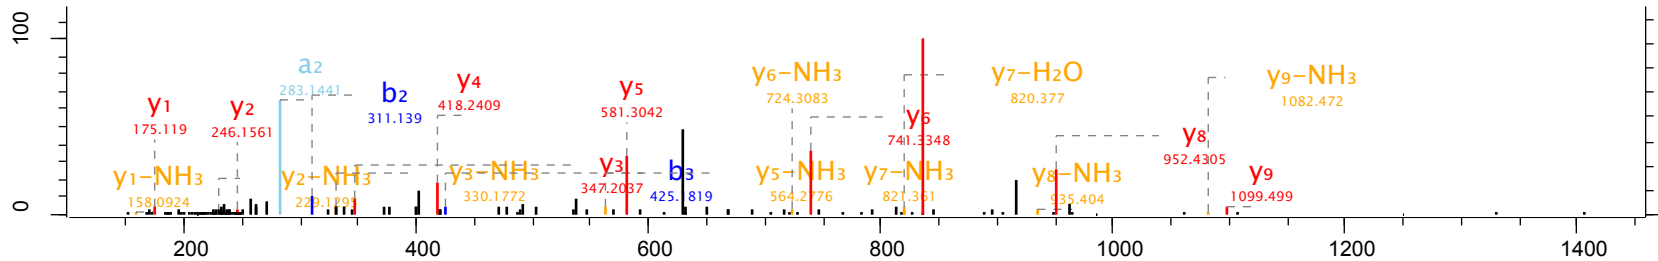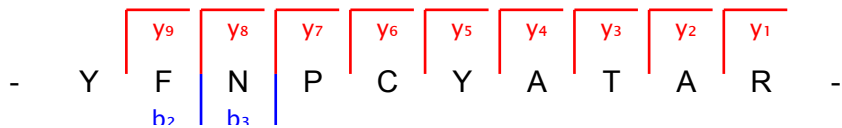

Raw file

Scan

Method

Score

m/z

20140925\_fract16\_dyn\_5ul\_C8\_01\_451

15773

TOF; CID

70.54

601.83

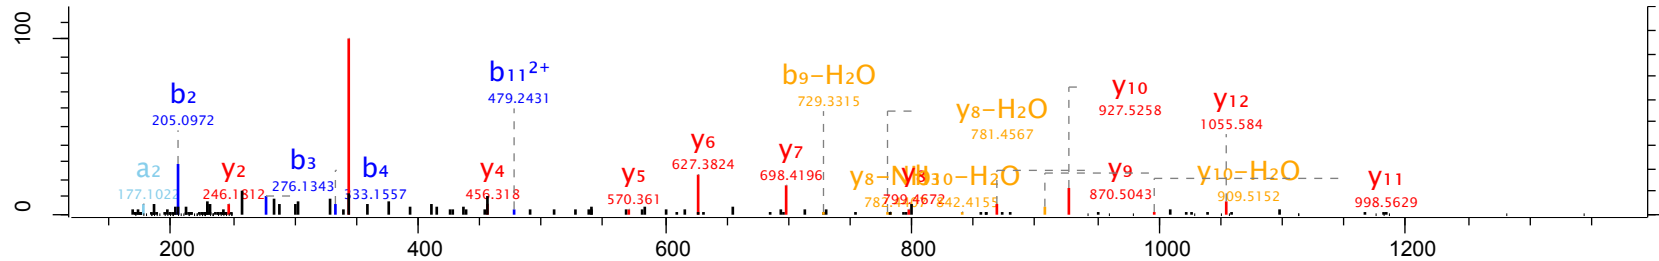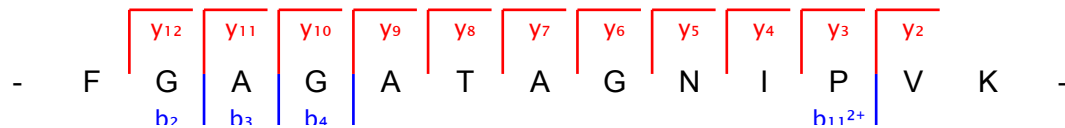

Raw file

Scan

Method

Score

m/z

Gene names

20140925\_fract16\_dyn\_5ul\_C8\_01\_451

18234

TOF; CID

73.44

553.8

C19orf43

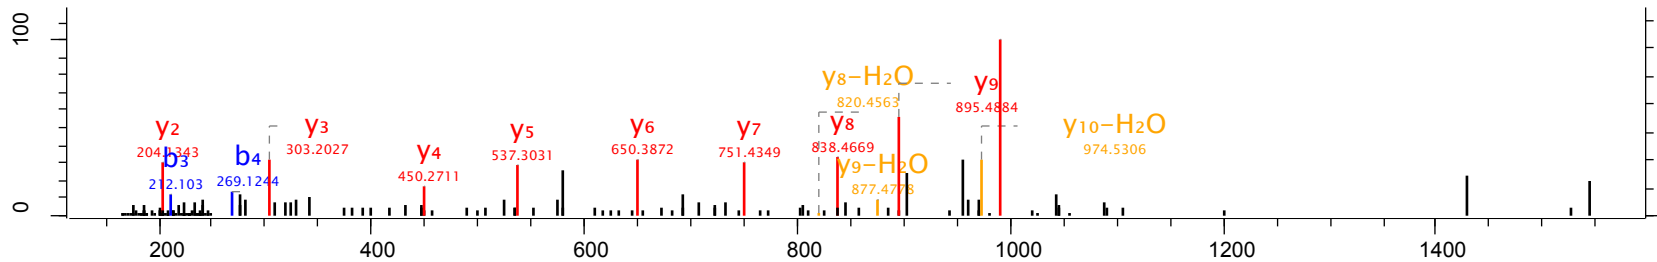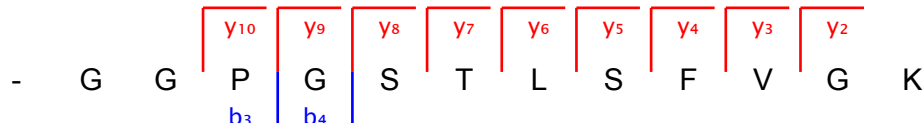

Raw file

Scan

Method

Score

m/z

Gene names

20140925\_fract16\_dyn\_5ul\_C8\_01\_451

18592

TOF; CID

81.57

1043.03

ZFP36

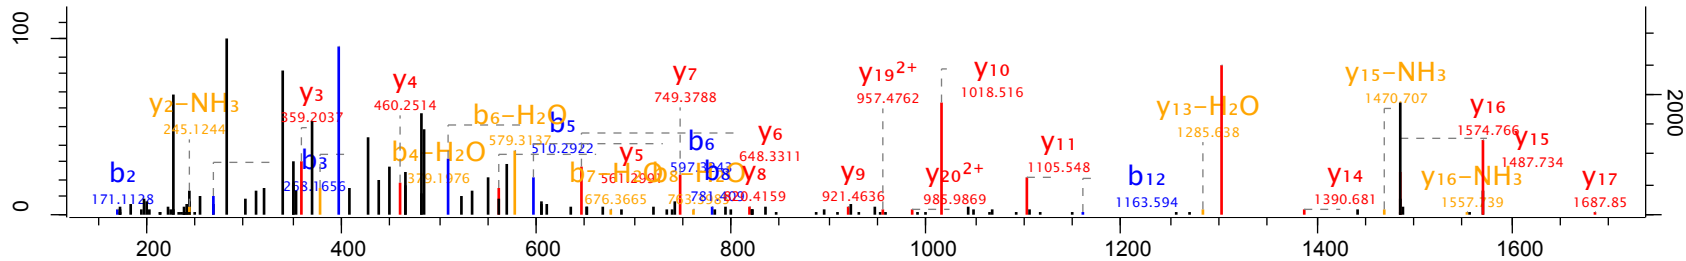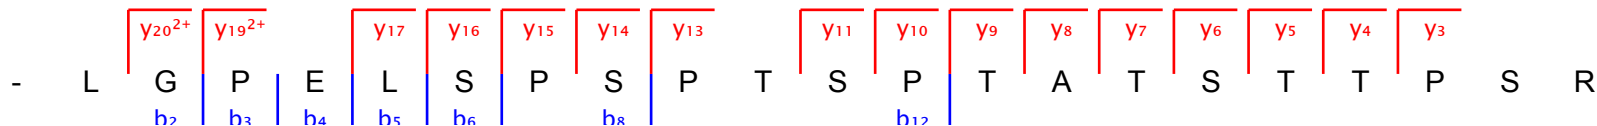

| Raw file                           | Scan  | Method   | Score | m/z    | Gene names |
|------------------------------------|-------|----------|-------|--------|------------|
| 20140925_fract16_dyn_5ul_C8_01_451 | 19513 | TOF; CID | 93.37 | 672.33 | TMEM243    |

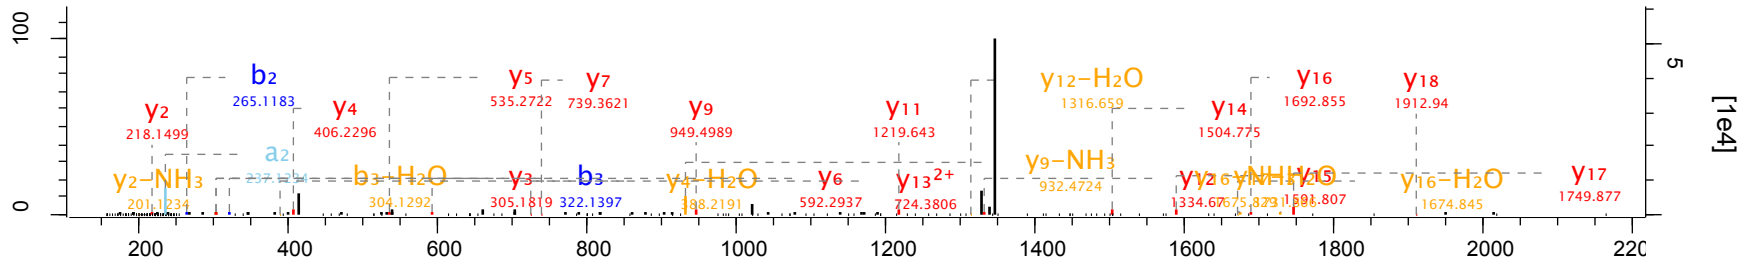

- T Y G T S G L D N R P L F G E T S A K -  
 b<sub>2</sub> b<sub>3</sub>

y<sub>18</sub> y<sub>17</sub> y<sub>16</sub> y<sub>15</sub> y<sub>14</sub> y<sub>13</sub><sup>2+</sup> y<sub>12</sub> y<sub>11</sub> y<sub>9</sub> y<sub>7</sub> y<sub>6</sub> y<sub>5</sub> y<sub>4</sub> y<sub>3</sub> y<sub>2</sub>

Raw file

20140925\_fract16\_dyn\_5ul\_C8\_01\_451

Scan

20857

Method

TOF; CID

Score

74.84

m/z

517.78

Gene names

TMEM18

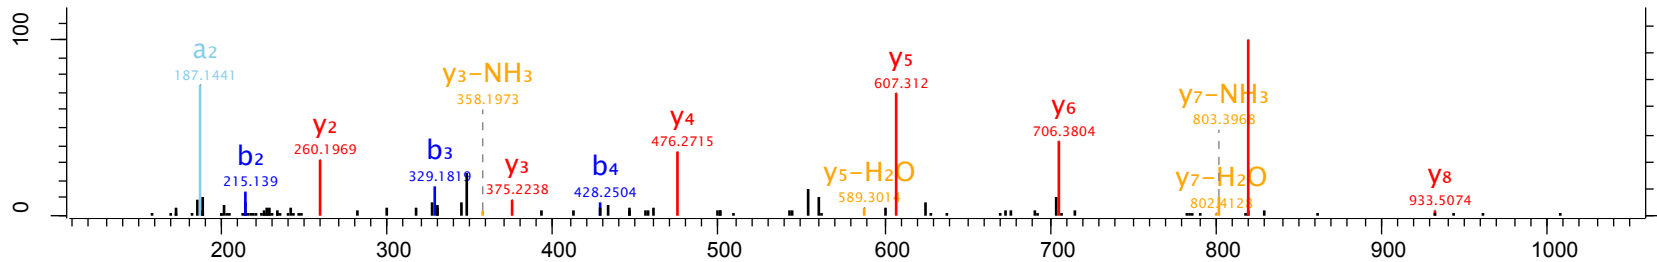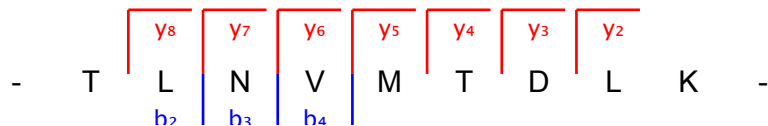

Raw file

20140925\_fract16\_dyn\_5ul\_C8\_01\_451

Scan

24987

Method

TOF; CID

Score

63.06

m/z

730.38

Gene names

DMBT1

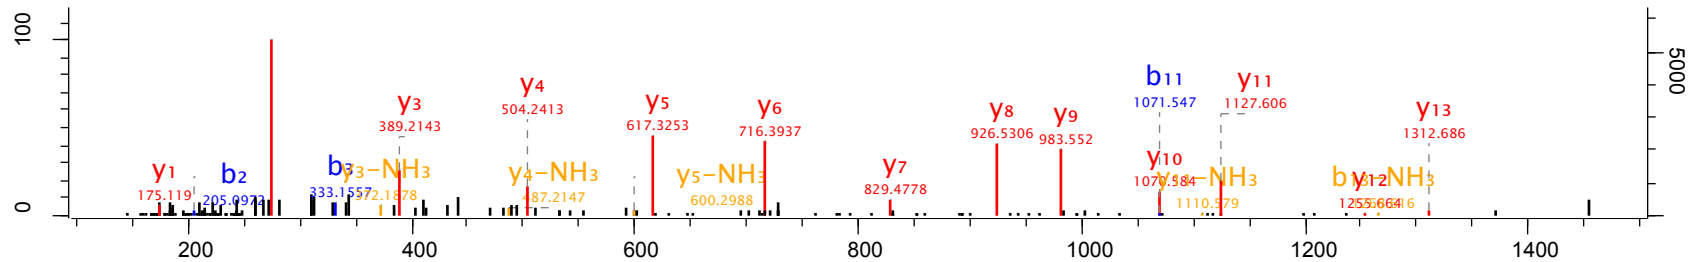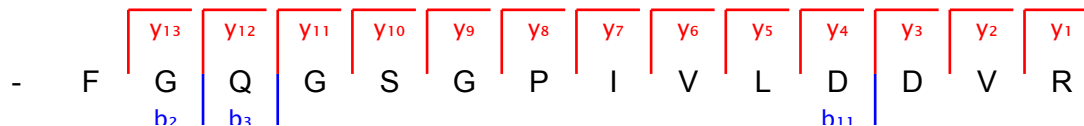



Raw file

20140925\_fract16\_dyn\_5ul\_C8\_01\_451

Scan

25322

Method

TOF; CID

Score

92.27

m/z

900.41

Gene names

RAET1E

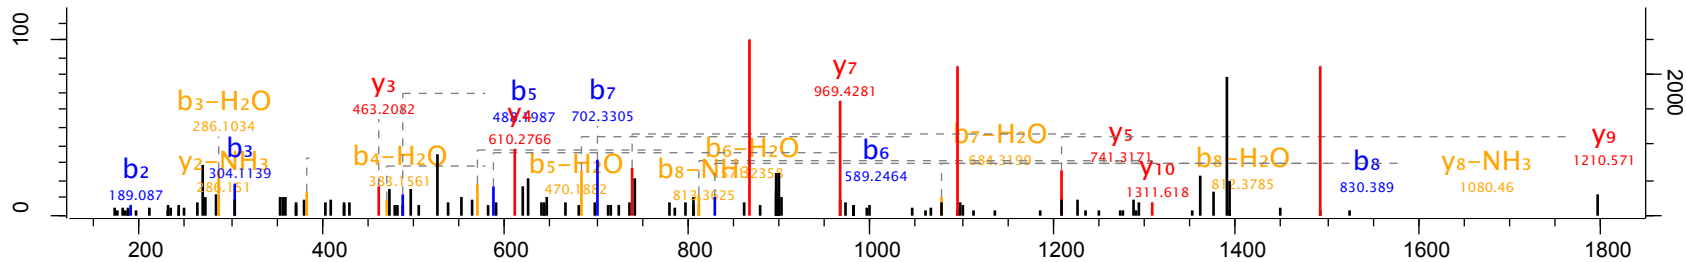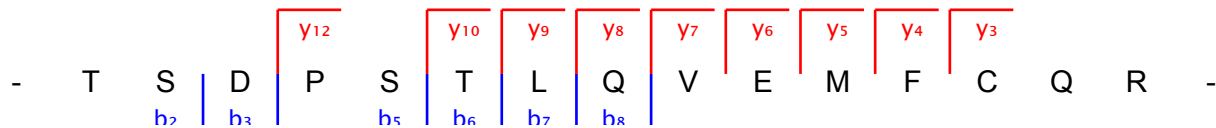

Raw file

Scan

Method

Score

m/z

Gene names

20140925\_fract16\_dyn\_5ul\_C8\_01\_451

30967

TOF; CID

109.25

945.77

TMEM222

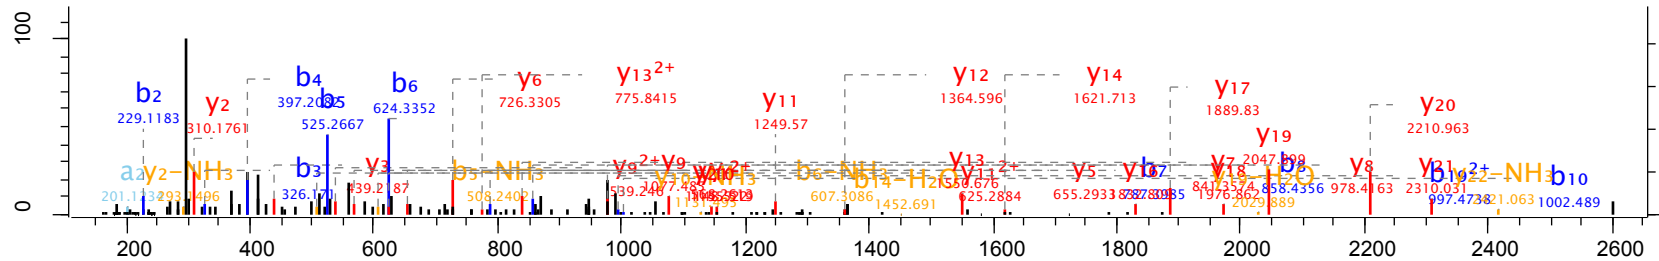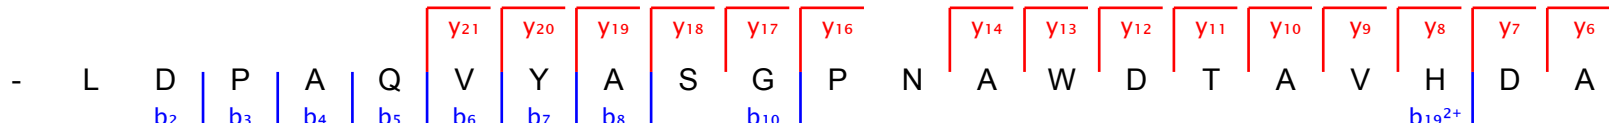

Raw file

Scan

Method

Score

m/z

Gene names

20140925\_fract16\_dyn\_5ul\_C8\_01\_451

32372

TOF; CID

66.99

647.91

MAD2L1BP

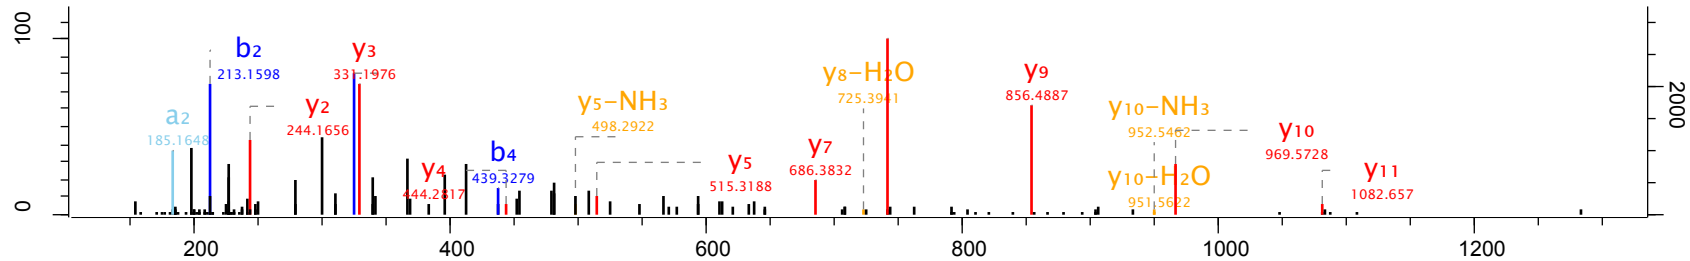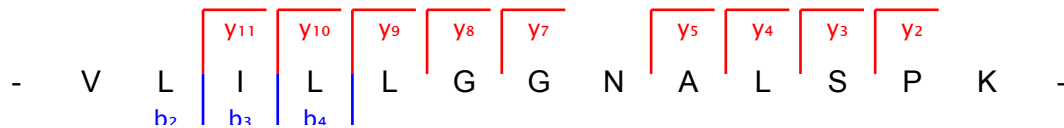

Raw file

20140925\_fract16\_dyn\_5ul\_C8\_01\_451

Scan

36437

Method

TOF; CID

Score

138.91

m/z

664

Gene names

ABRACL

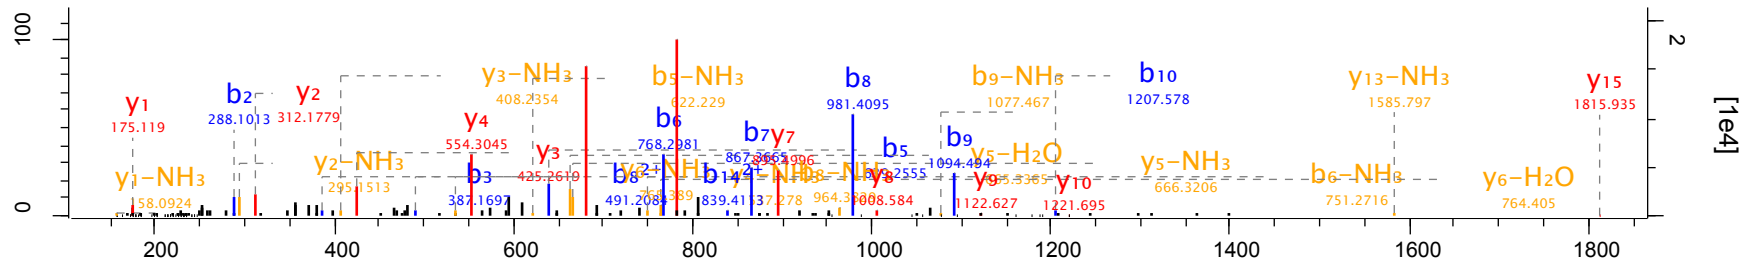

ac

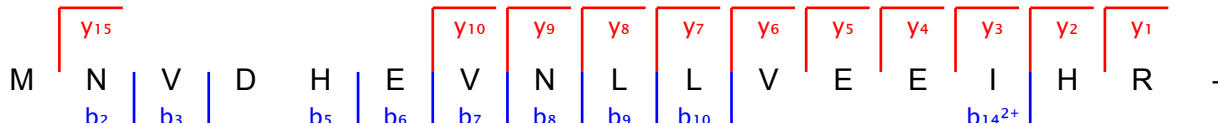

Raw file

20140925\_fract16\_dyn\_5ul\_C8\_01\_451

Scan

37296

Method

TOF; CID

Score

70.11

m/z

907.81

Gene names

HIGD2A

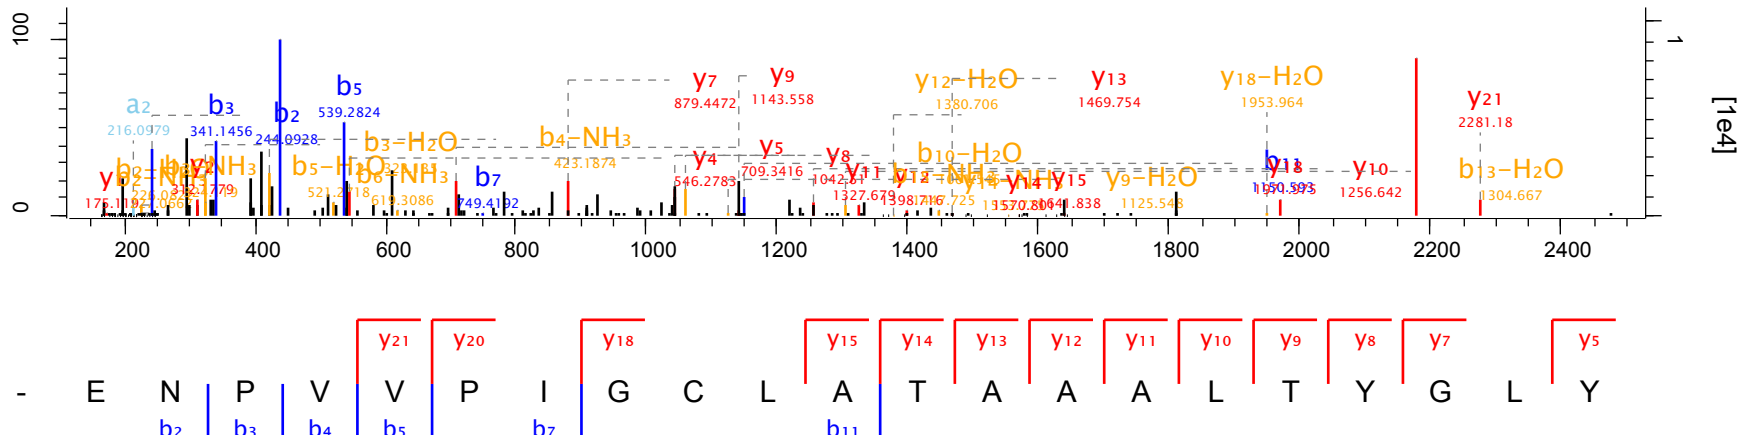

Raw file

20140925\_fract17\_dyn\_5ul\_H1\_01\_452

Scan

9066

Method

TOF; CID

Score

46.28

m/z

513.27

Gene names

RBL1

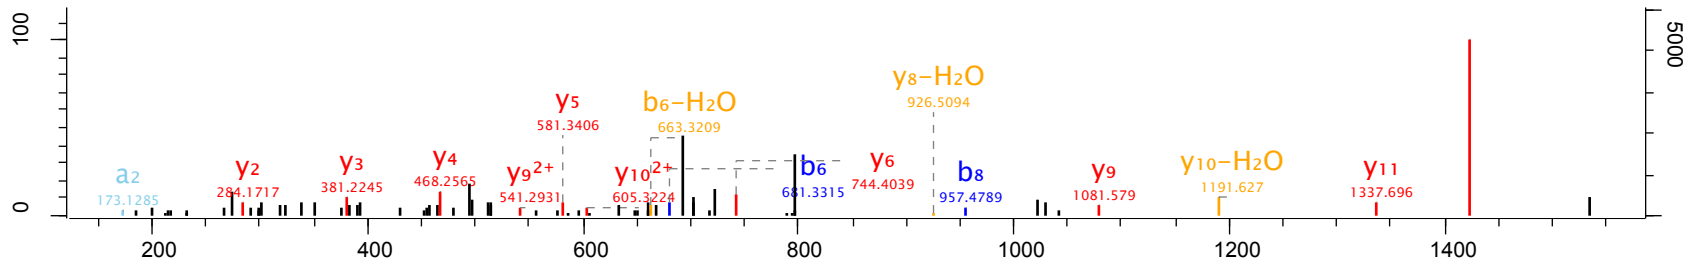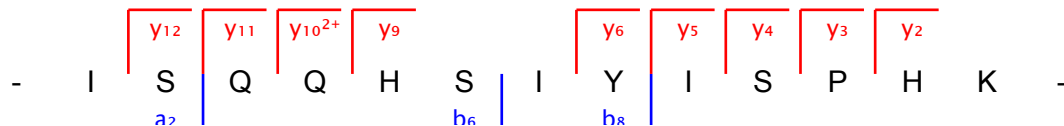

| Raw file                           | Scan | Method   | Score  | m/z    | Gene names |
|------------------------------------|------|----------|--------|--------|------------|
| 20140925_fract17_dyn_5ul_H1_01_452 | 9341 | TOF; CID | 120.65 | 429.74 | SLC46A1    |

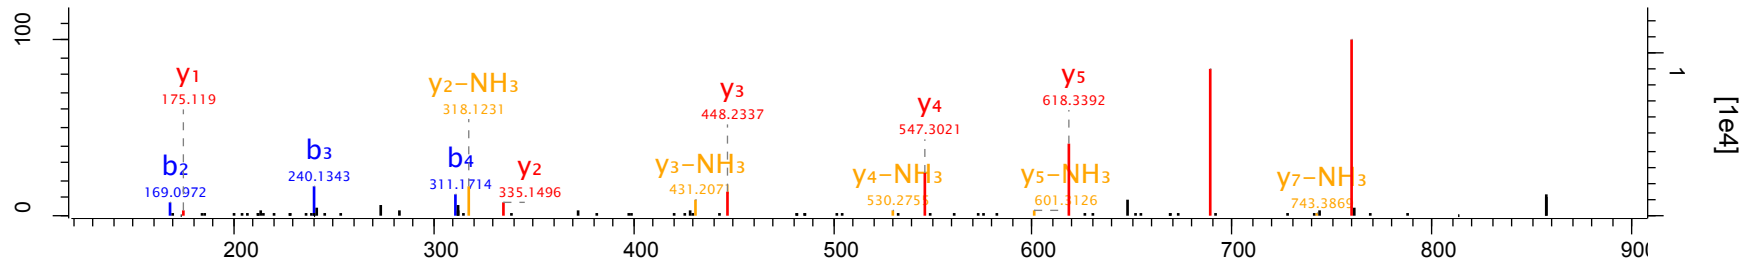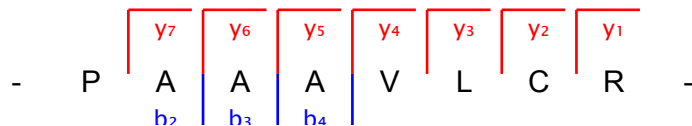

Raw file

20140925\_fract17\_dyn\_5ul\_H1\_01\_452

Scan

12167

Method

TOF; CID

Score

96.67

m/z

512.61

Gene names

PNMA1

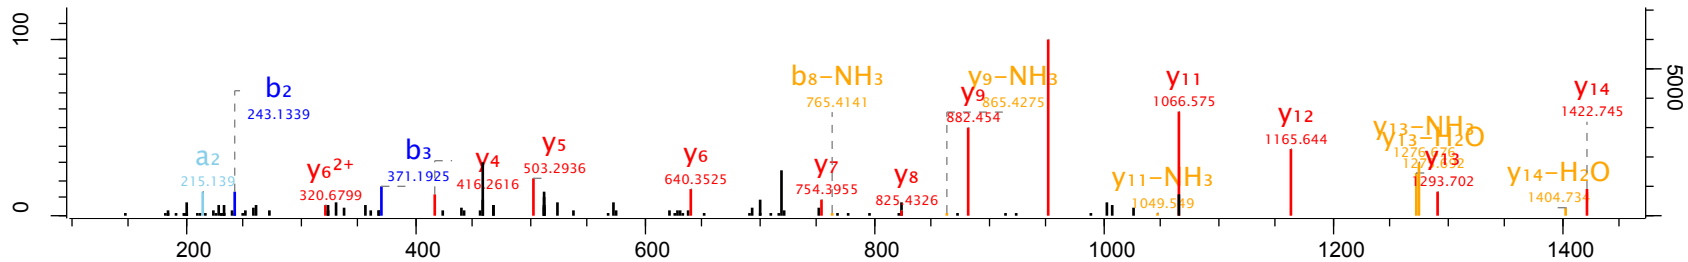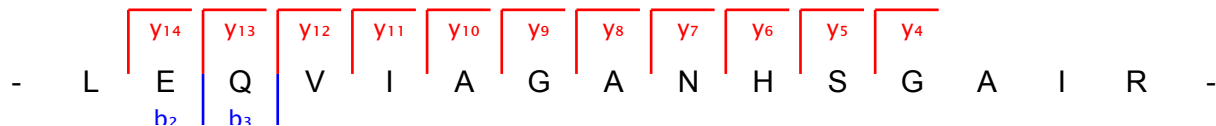



| Raw file                           | Scan  | Method   | Score | m/z    | Gene names |
|------------------------------------|-------|----------|-------|--------|------------|
| 20140925_fract17_dyn_5ul_H1_01_452 | 13149 | TOF; CID | 86.46 | 602.81 | OTUD3      |

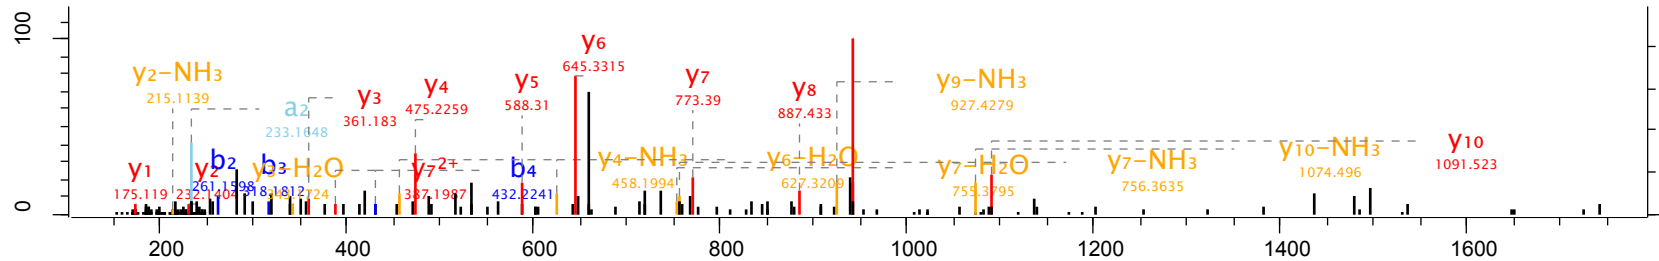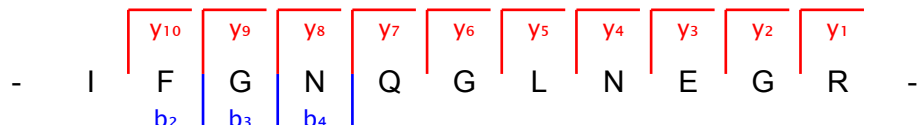

Raw file

Scan

Method

Score

m/z

Gene names

20140925\_fract17\_dyn\_5ul\_H1\_01\_452

18506

TOF; CID

104.81

705.36

TMEM69

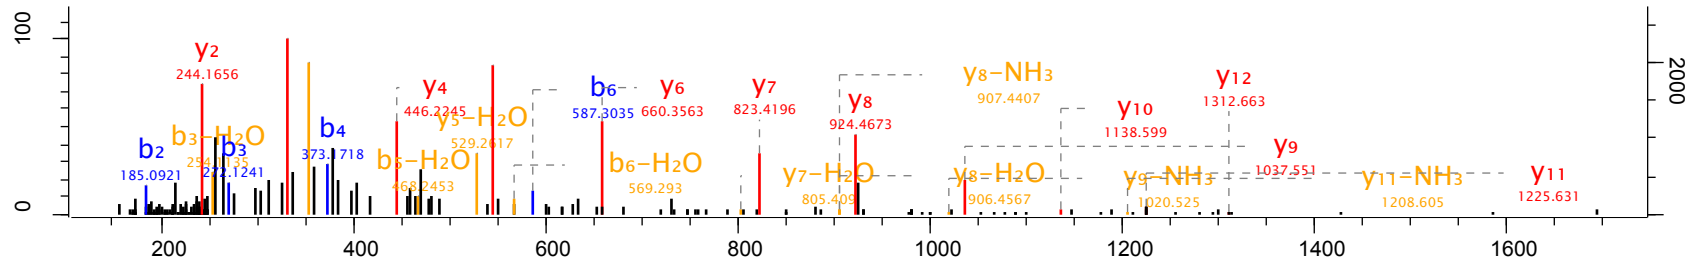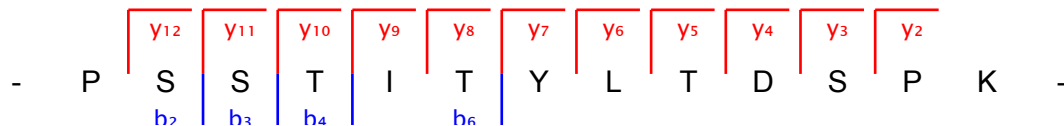

Raw file

20140925\_fract17\_dyn\_5ul\_H1\_01\_452

Scan

19014

Method

TOF; CID

Score

109.47

m/z

685.87

Gene names

KDM6A

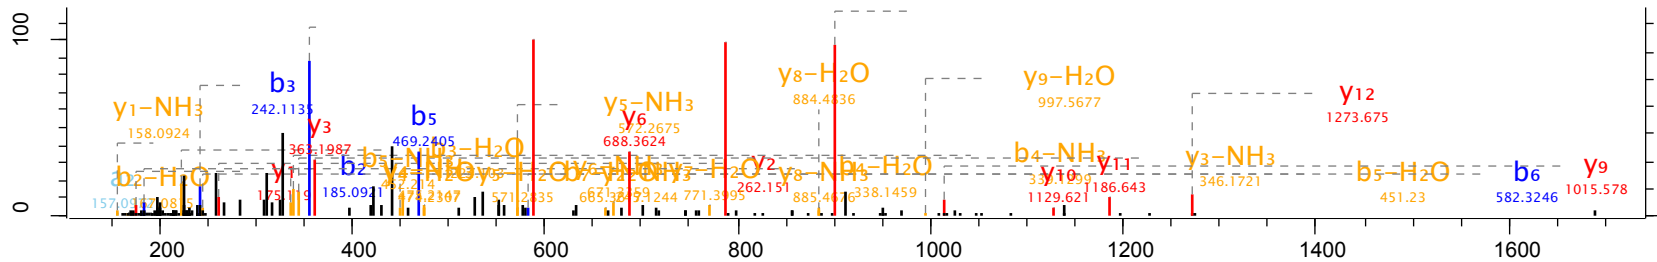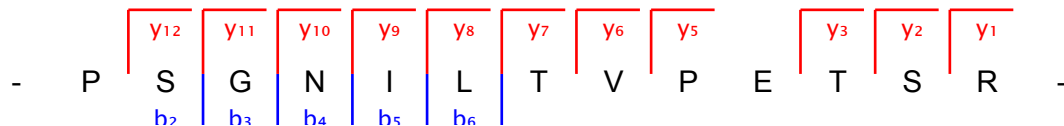

Raw file

20140925\_fract17\_dyn\_5ul\_H1\_01\_452

Scan

19441

Method

TOF; CID

Score

42.71

m/z

813.9

Gene names

BAD

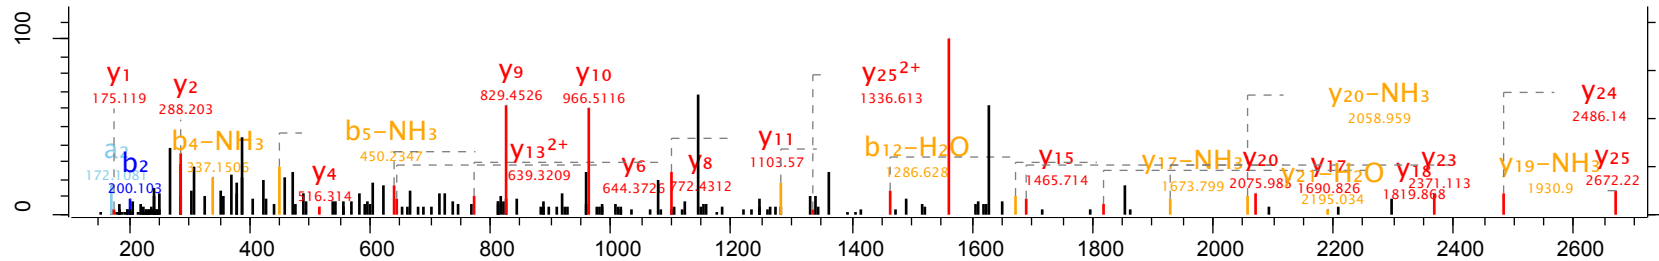

- Q A P G L L W D A S H Q Q E Q P T S S S H  
 |  
 b<sub>2</sub>

y<sub>25</sub> y<sub>24</sub> y<sub>23</sub> y<sub>20</sub> y<sub>18</sub> y<sub>17</sub> y<sub>16</sub> y<sub>15</sub> y<sub>13</sub><sup>2+</sup> y<sub>11</sub>

Raw file

20140925\_fract17\_dyn\_5ul\_H1\_01\_452

Scan

20775

Method

TOF; CID

Score

104.39

m/z

632.31

Gene names

SPA17

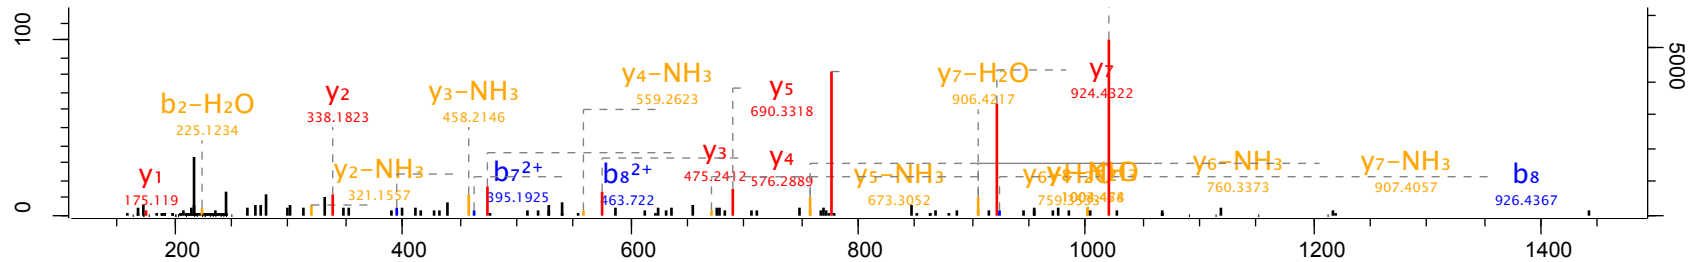

ac

- S I P F S N T H Y R -  
 y8 y7 y6 y5 y4 y3 y2 y1  
 b7<sup>2+</sup> b8

Raw file

20140925\_fract17\_dyn\_5ul\_H1\_01\_452

Scan

23179

Method

TOF; CID

Score

80.69

m/z

587.82

Gene names

SYNGR3

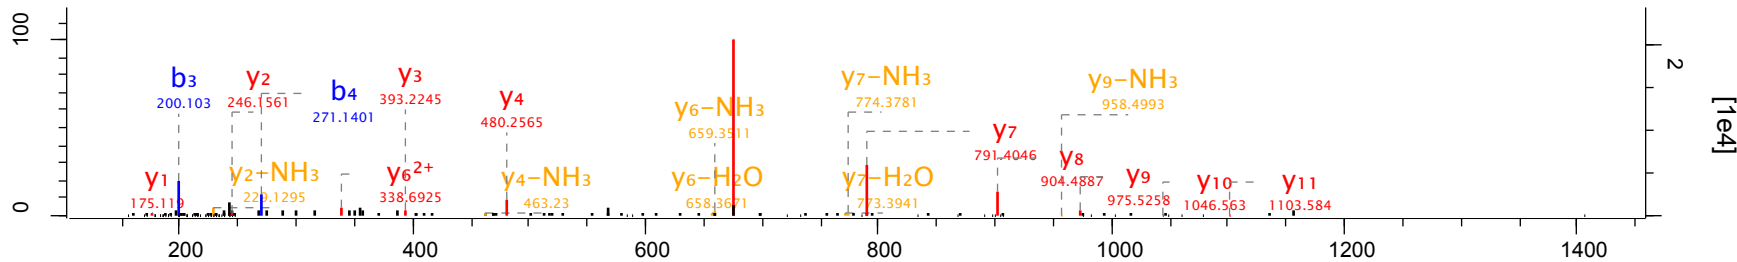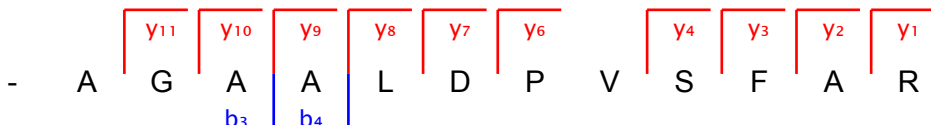

Raw file

20140925\_fract17\_dyn\_5ul\_H1\_01\_452

Scan

23260

Method

TOF; CID

Score

99.45

m/z

813.07

Gene names

LHFPL2

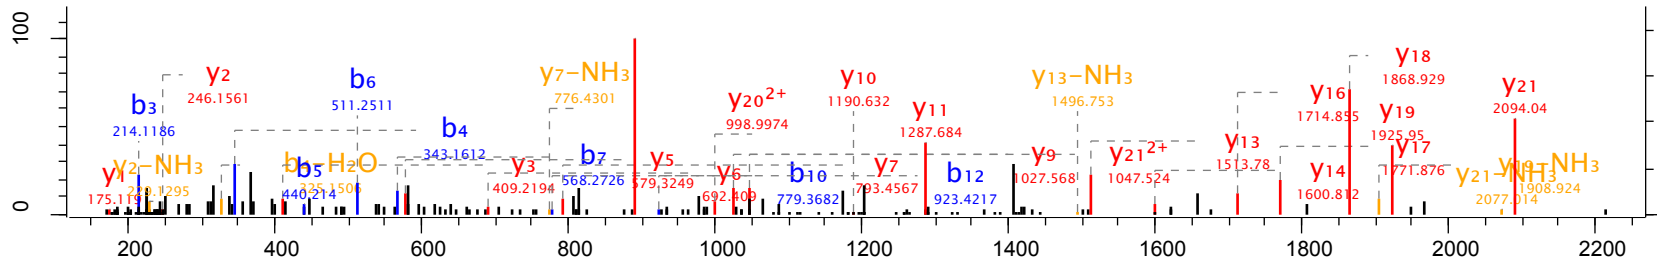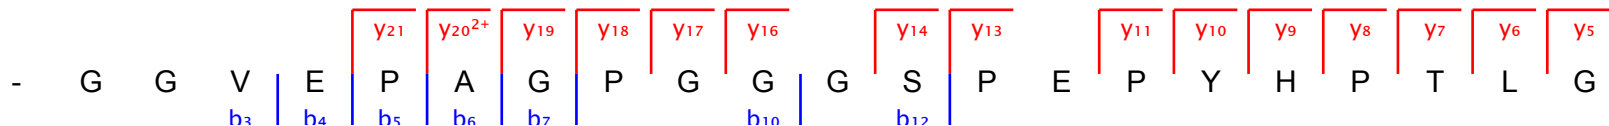

| Raw file                           | Scan  | Method   | Score | m/z    | Gene names |
|------------------------------------|-------|----------|-------|--------|------------|
| 20140925_fract17_dyn_5ul_H1_01_452 | 27140 | TOF; CID | 60.55 | 862.45 | PSENN      |

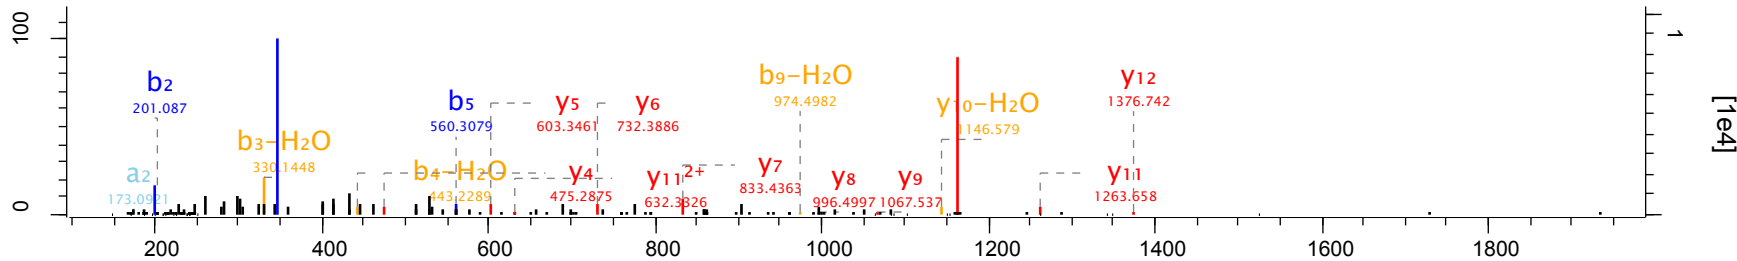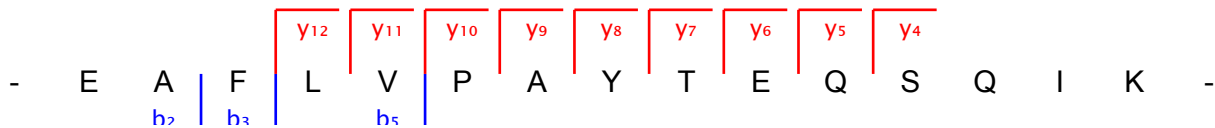



Raw file

20140925\_fract17\_dyn\_5ul\_H1\_01\_452

Scan

29034

Method

TOF; CID

Score

54.76

m/z

991.01

Gene names

UBE2W

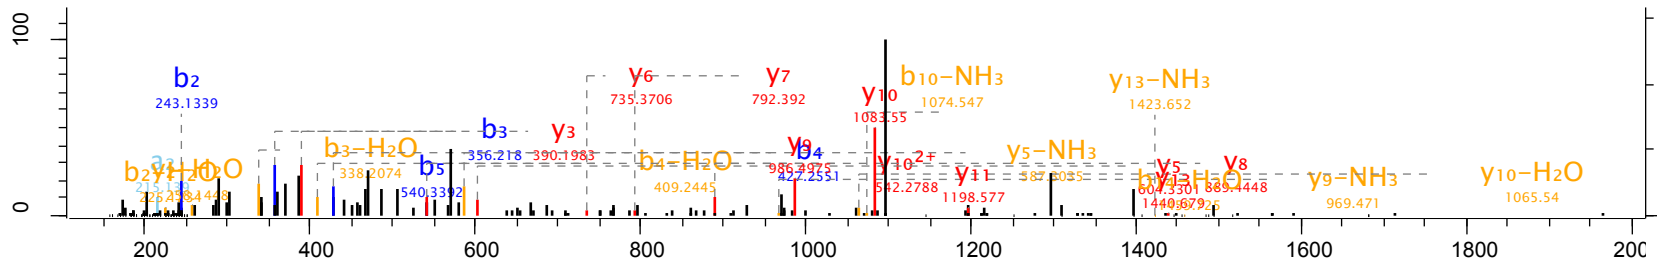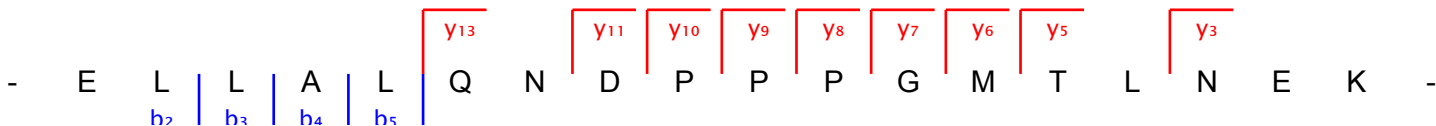

Raw file

20140925\_fract17\_dyn\_5ul\_H1\_01\_452

Scan

32819

Method

TOF; CID

Score

79.84

m/z

1015.45

Gene names

NPL

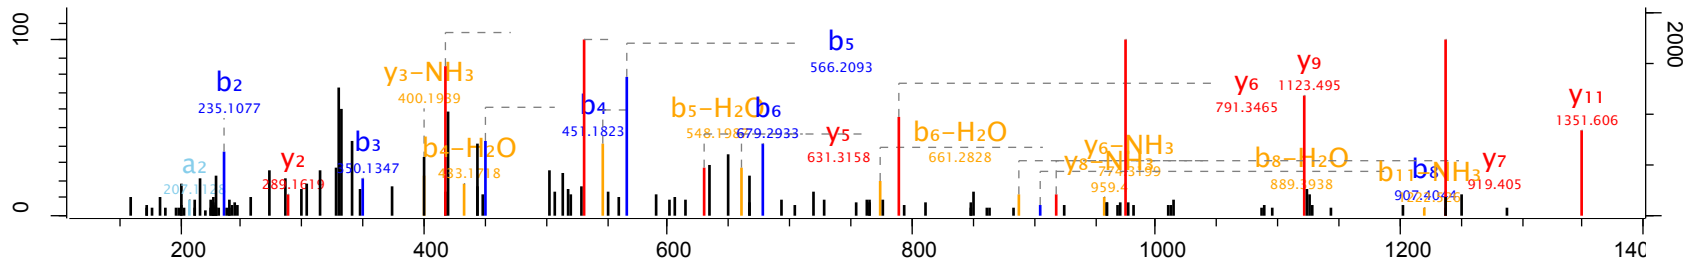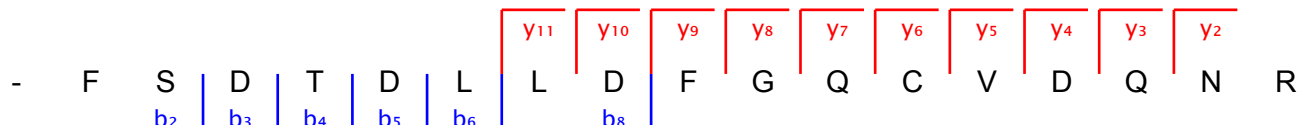

| Raw file                           | Scan  | Method   | Score | m/z     | Gene names |
|------------------------------------|-------|----------|-------|---------|------------|
| 20140925_fract17_dyn_5ul_H1_01_452 | 34843 | TOF; CID | 41.48 | 1146.88 | SWI5       |

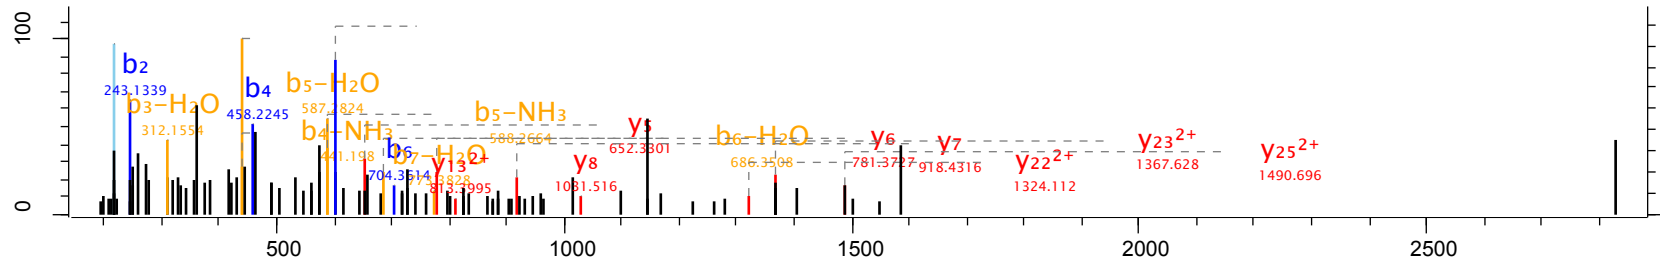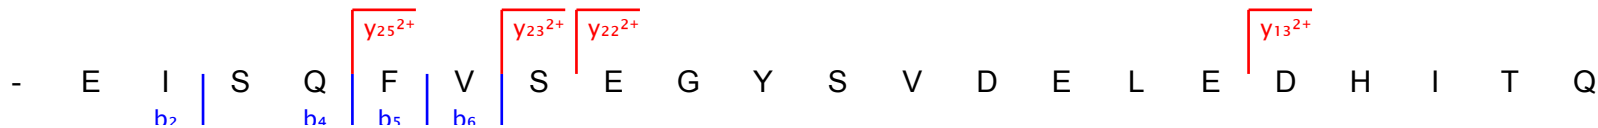

Raw file

20140925\_fract17\_dyn\_5ul\_H1\_01\_452

Scan

36344

Method

TOF; CID

Score

39.83

m/z

743.39

Gene names

ZNF512B

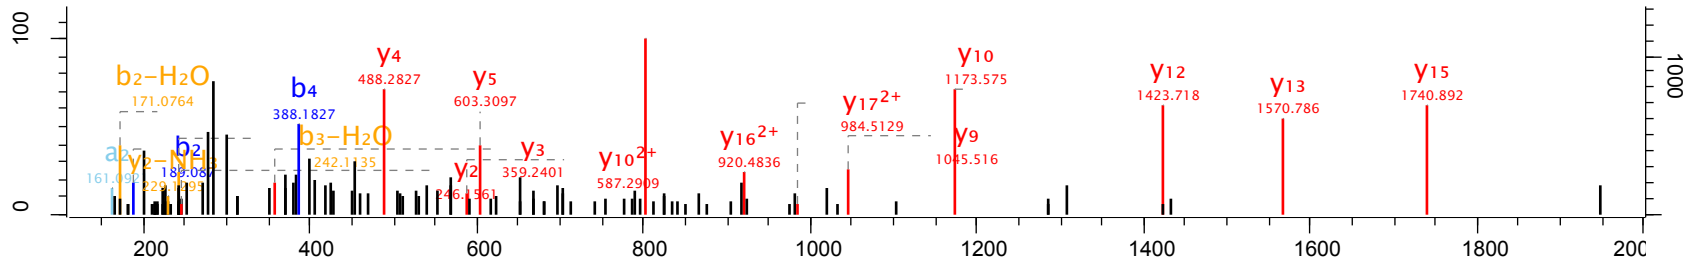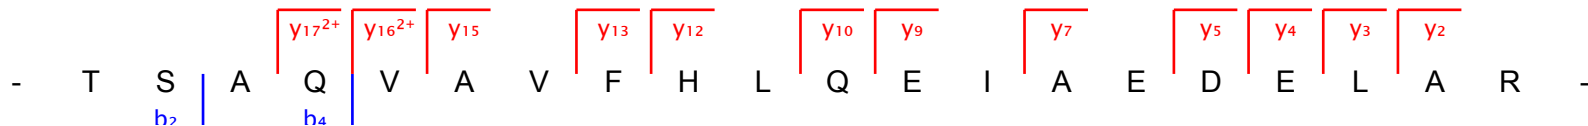

Raw file

Scan

Method

Score

m/z

Gene names

20140925\_fract18\_dyn\_5ul\_H2\_01\_453

5019

TOF; CID

72.29

436.25

ZNF707

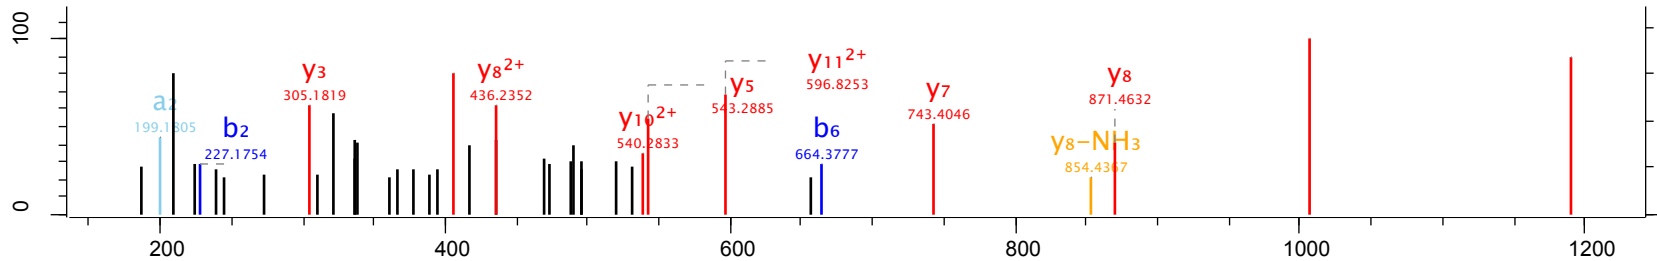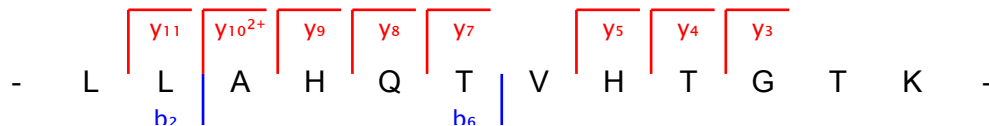

Raw file

Scan

Method

Score

m/z

Gene names

20140925\_fract18\_dyn\_5ul\_H2\_01\_453

5714

TOF; CID

55.26

483.92

ZXDB

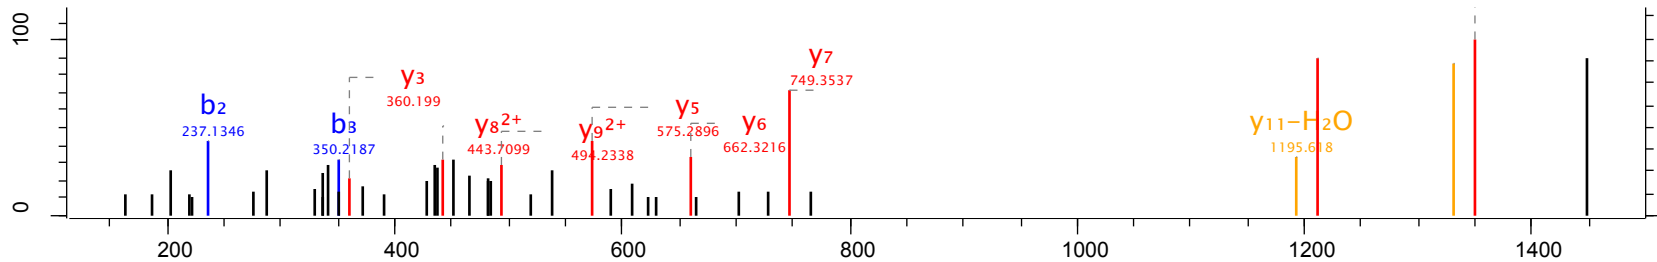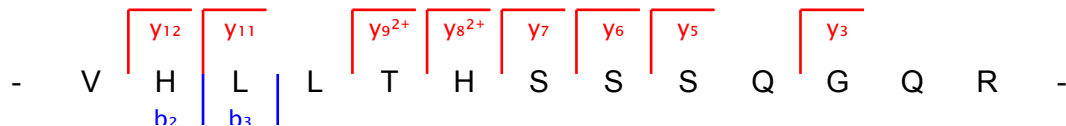

Raw file

20140925\_fract18\_dyn\_5ul\_H2\_01\_453

Scan

6526

Method

TOF; CID

Score

84.51

m/z

655.83

Gene names

RNF167

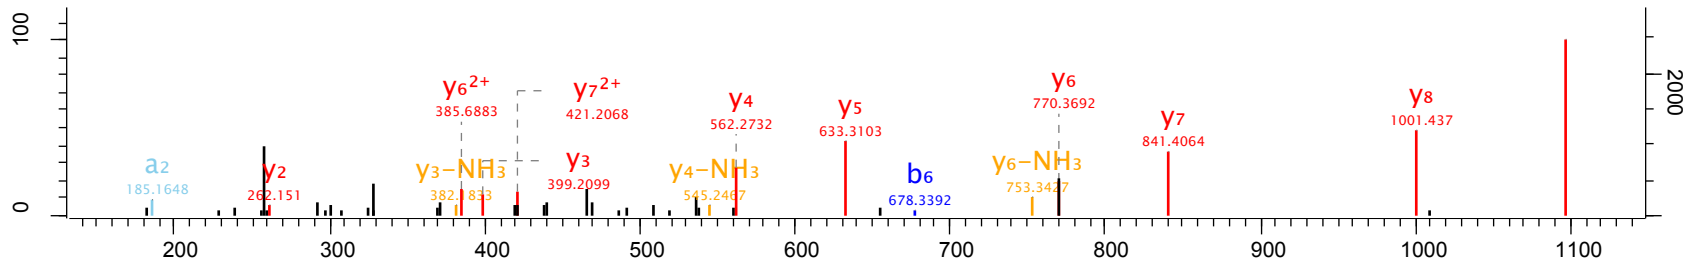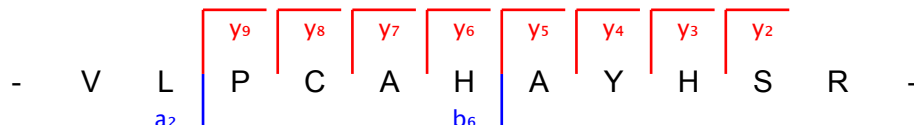

Raw file

20140925\_fract18\_dyn\_5ul\_H2\_01\_453

Scan

8990

Method

TOF; CID

Score

123.67

m/z

457.24

Gene names

ZFP62

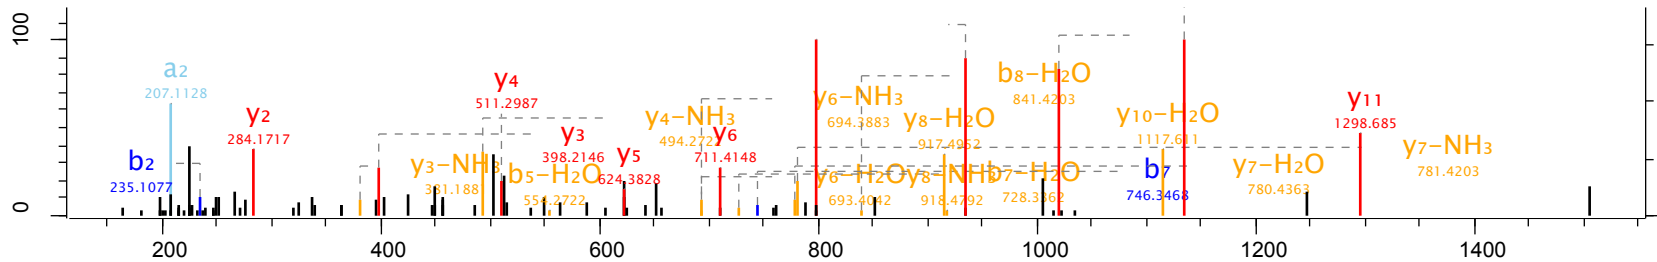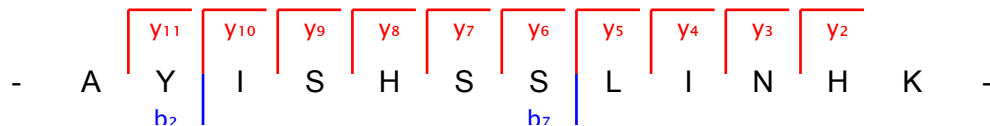



Raw file

20140925\_fract18\_dyn\_5ul\_H2\_01\_453

Scan

11106

Method

TOF; CID

Score

63.32

m/z

362.2

Gene names

RTN4R

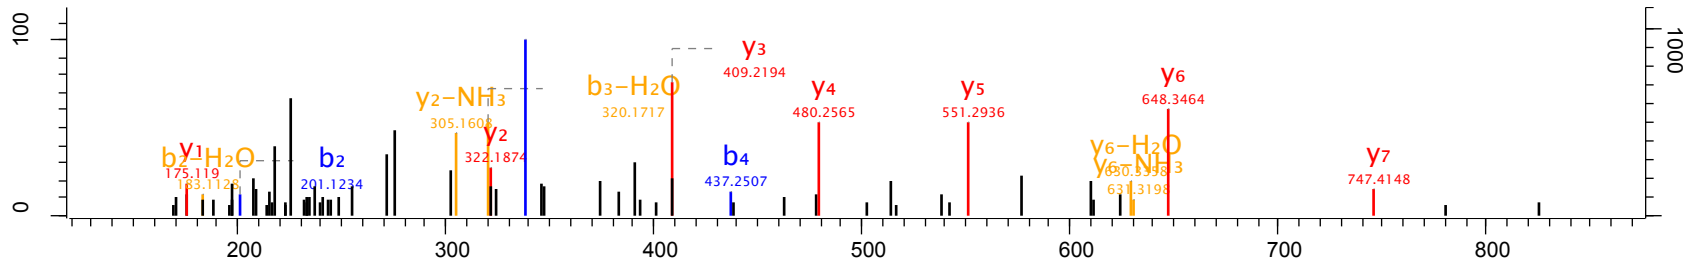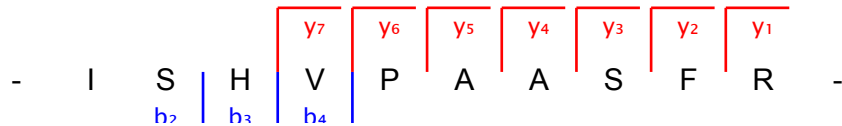

Raw file

Scan

Method

Score

m/z

Gene names

20140925\_fract18\_dyn\_5ul\_H2\_01\_453

12108

TOF; CID

89.19

621.31

C14orf119

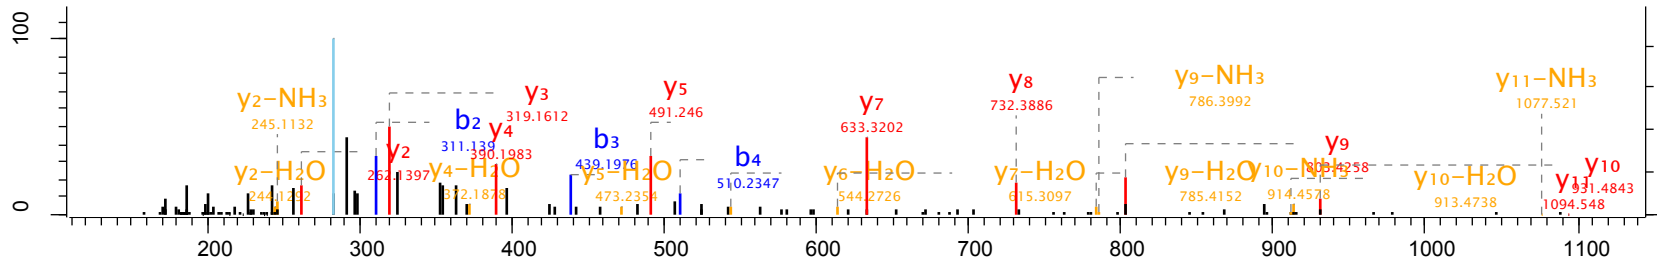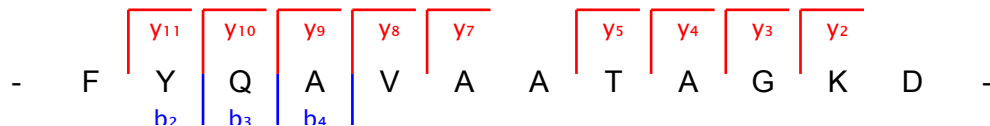

Raw file

20140925\_fract18\_dyn\_5ul\_H2\_01\_453

Scan

14821

Method

TOF; CID

Score

44.86

m/z

736.06

Gene names

TTC8

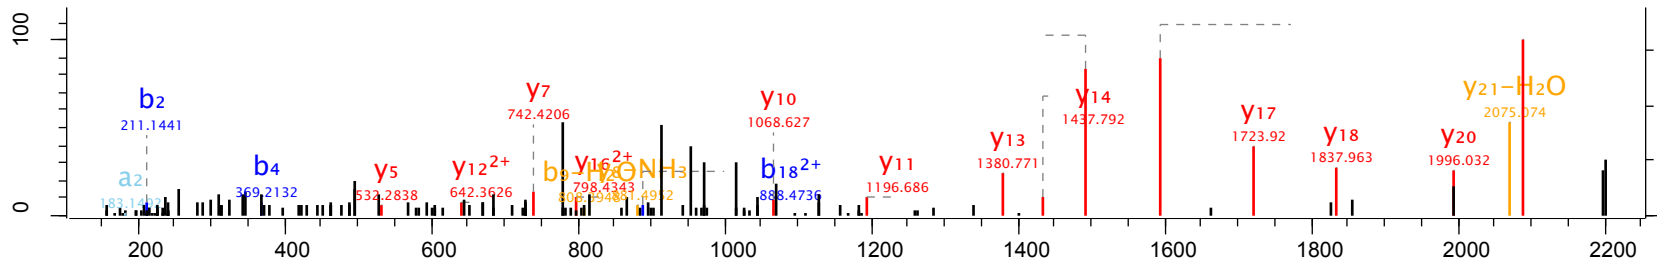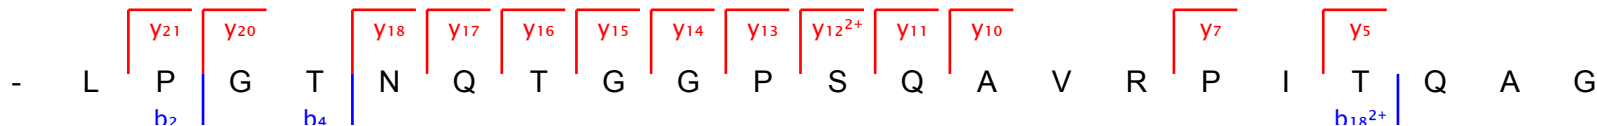

Raw file

20140925\_fract18\_dyn\_5ul\_H2\_01\_453

Scan

15116

Method

TOF; CID

Score

111.12

m/z

781.86

Gene names

PEMT

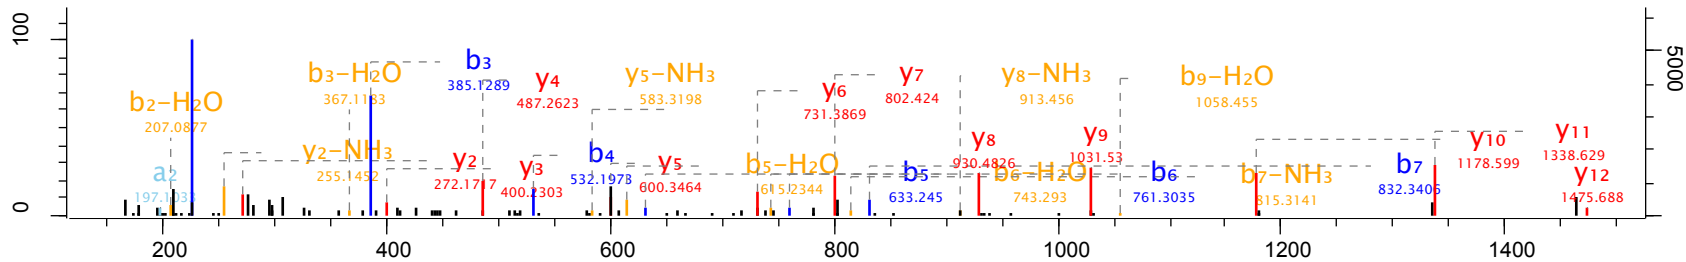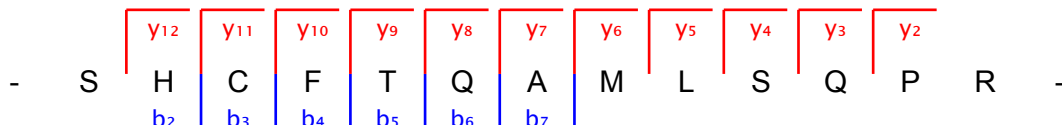

Raw file

Scan

Method

Score

m/z

Gene names

20140925\_fract18\_dyn\_5ul\_H2\_01\_453

15973

TOF; CID

81.3

365.55

ATAT1

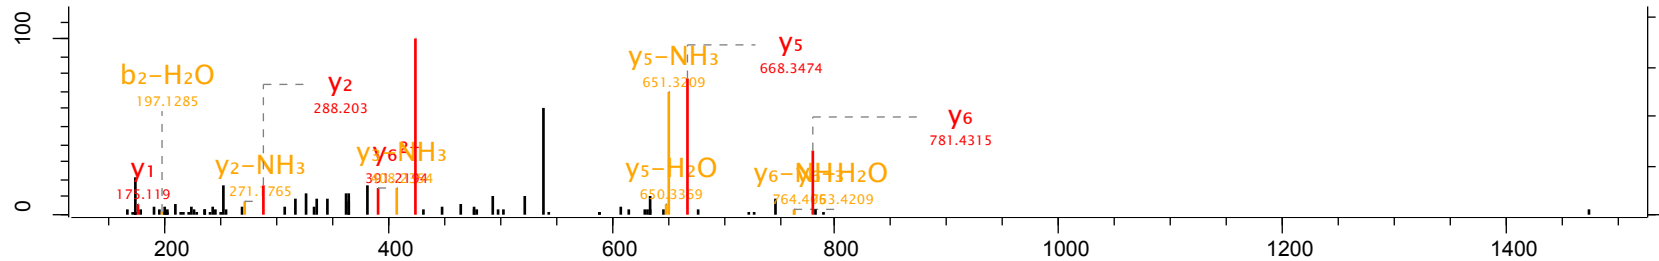

- I T V L D Q H L R -

Fragmentation patterns are indicated by red brackets above the amino acid sequence, showing the following assignments:

- $y_6$  is associated with the L-D peptide.
- $y_5$  is associated with the D-Q peptide.
- $y_3$  is associated with the H-L peptide.
- $y_2$  is associated with the L-R peptide.
- $y_1$  is associated with the R peptide.

Raw file

20140925\_fract18\_dyn\_5ul\_H2\_01\_453

Scan

17699

Method

TOF; CID

Score

157.99

m/z

436.58

Gene names

RPL39;RPL39P5

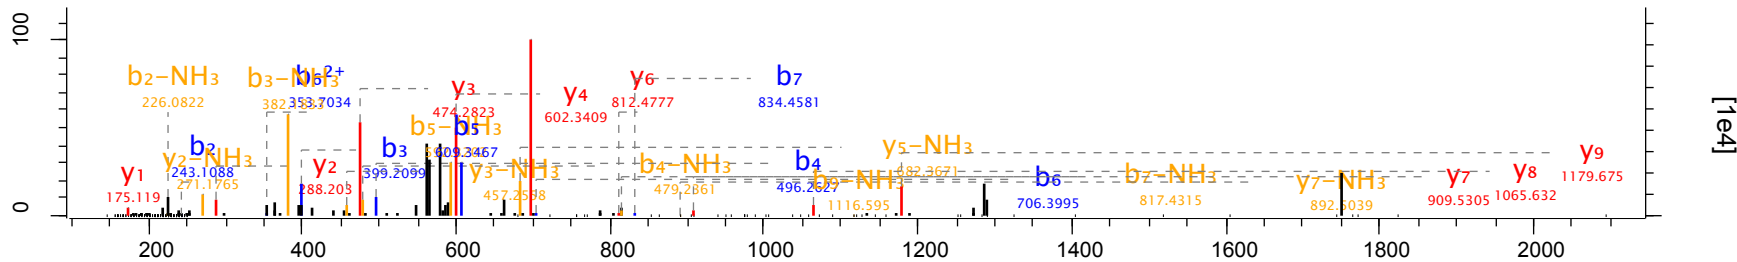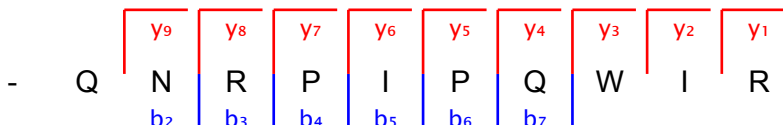

| Raw file                           | Scan  | Method   | Score | m/z    | Gene names |
|------------------------------------|-------|----------|-------|--------|------------|
| 20140925_fract18_dyn_5ul_H2_01_453 | 22779 | TOF; CID | 78.08 | 810.91 | MFSD1      |

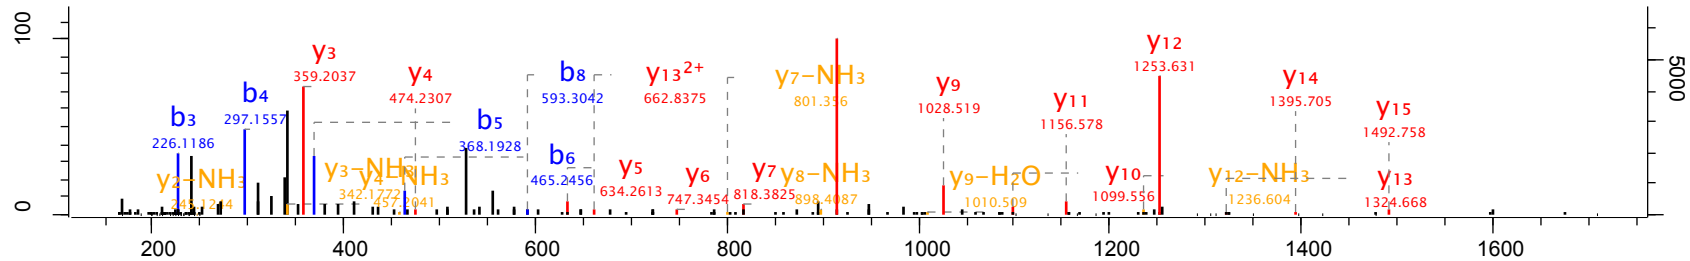

- G A P A A P G A L P A L C D P S R -  
 b<sub>3</sub> b<sub>4</sub> b<sub>5</sub> b<sub>6</sub> b<sub>8</sub>  
 y<sub>15</sub> y<sub>14</sub> y<sub>13</sub> y<sub>12</sub> y<sub>11</sub> y<sub>10</sub> y<sub>9</sub> y<sub>8</sub> y<sub>7</sub> y<sub>6</sub> y<sub>5</sub> y<sub>4</sub> y<sub>3</sub>

Raw file

20140925\_fract18\_dyn\_5ul\_H2\_01\_453

Scan

23605

Method

TOF; CID

Score

106.3

m/z

788.38

Gene names

SMIM10

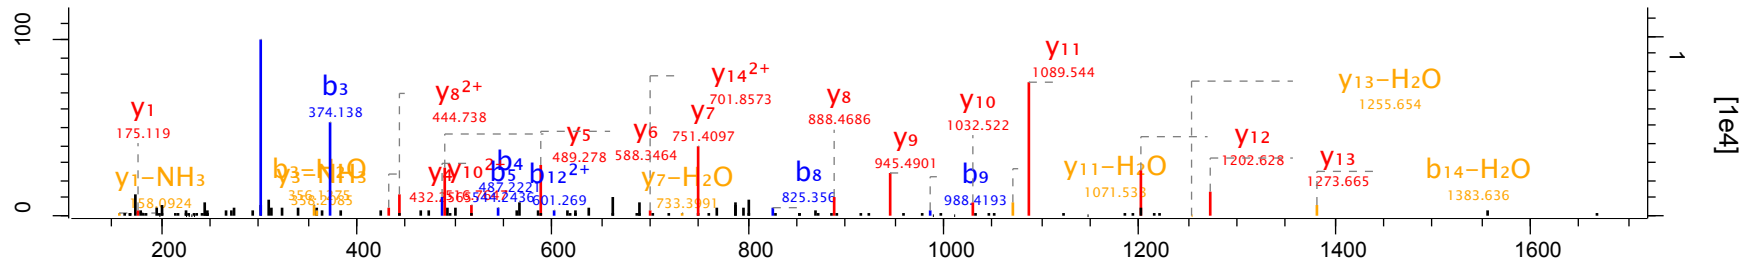

ac

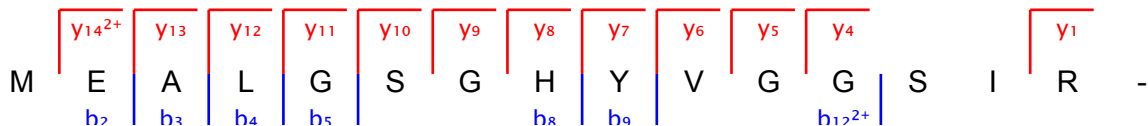



Raw file

20140925\_fract18\_dyn\_5ul\_H2\_01\_453

Scan

24761

Method

TOF; CID

Score

55.44

m/z

925.46

Gene names

PPDPF

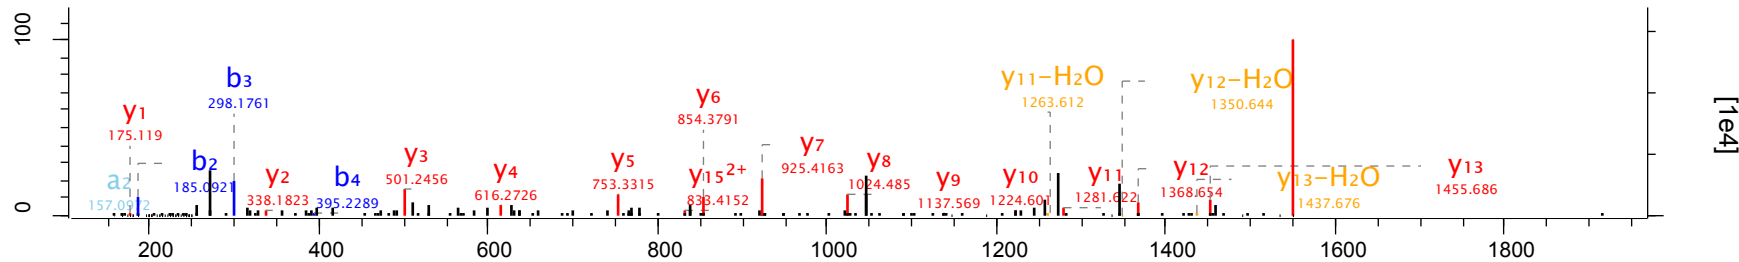

ac

- A A I P S S G S L V A T H D Y Y R -

b2 b3 b4

y15 2+ y14 y13 y12 y11 y10 y9 y8 y7 y6 y5 y4 y3 y2 y1

| Raw file                           | Scan  | Method   | Score  | m/z    | Gene names |
|------------------------------------|-------|----------|--------|--------|------------|
| 20140925_fract18_dyn_5ul_H2_01_453 | 26144 | TOF; CID | 106.28 | 941.45 | FAM168B    |

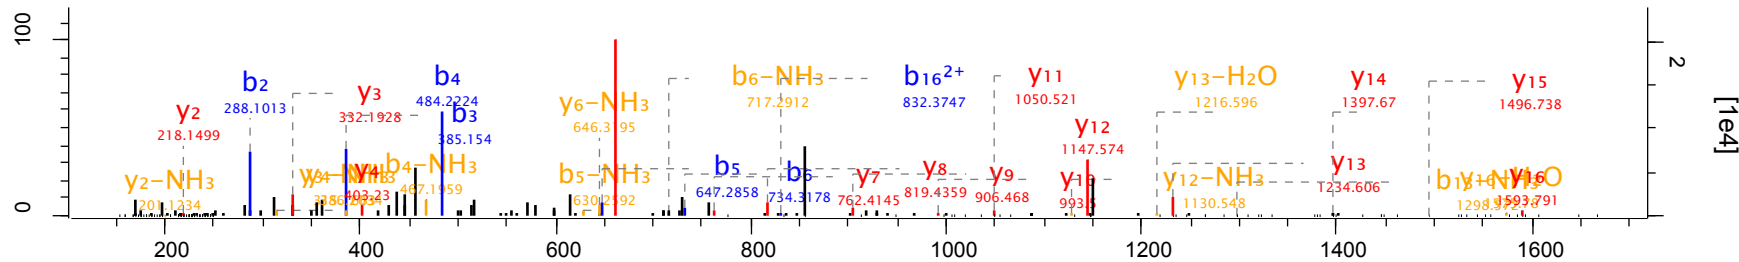

ac

- M N P V Y S P G S S G V P Y A N A K -

b<sub>2</sub> b<sub>3</sub> b<sub>4</sub> b<sub>5</sub> b<sub>6</sub> y<sub>16</sub> y<sub>15</sub> y<sub>14</sub> y<sub>13</sub> y<sub>12</sub> y<sub>11</sub> y<sub>10</sub> y<sub>9</sub> y<sub>8</sub> y<sub>7</sub> y<sub>6</sub> b<sub>16</sub><sup>2+</sup> y<sub>4</sub> y<sub>3</sub> y<sub>2</sub>

| Raw file                           | Scan  | Method   | Score | m/z   |
|------------------------------------|-------|----------|-------|-------|
| 20140925_fract18_dyn_5ul_H2_01_453 | 26801 | TOF; CID | 55.44 | 809.4 |

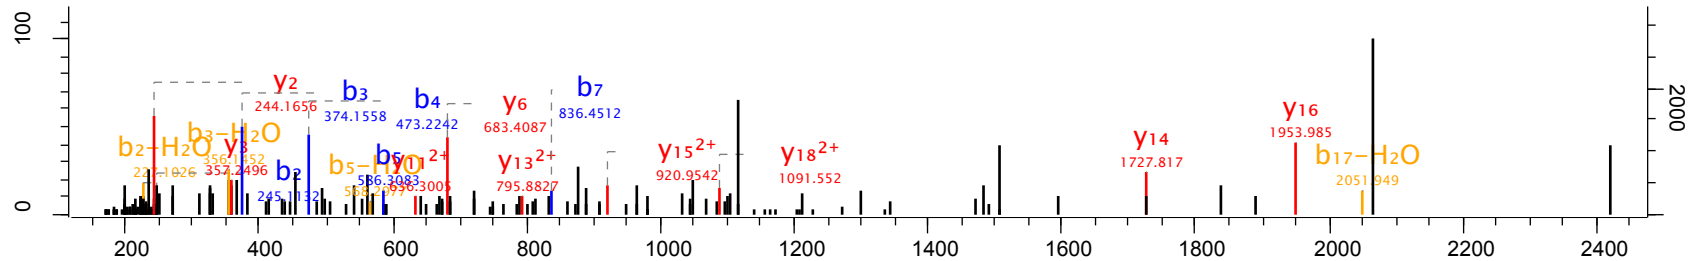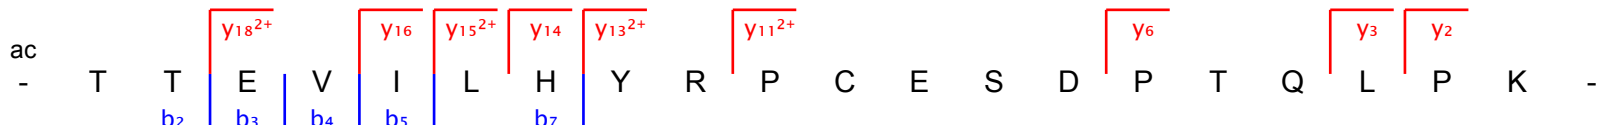

Raw file

20140925\_fract18\_dyn\_5ul\_H2\_01\_453

Scan

27740

Method

TOF; CID

Score

61.42

m/z

702.37

Gene names

VPS37C

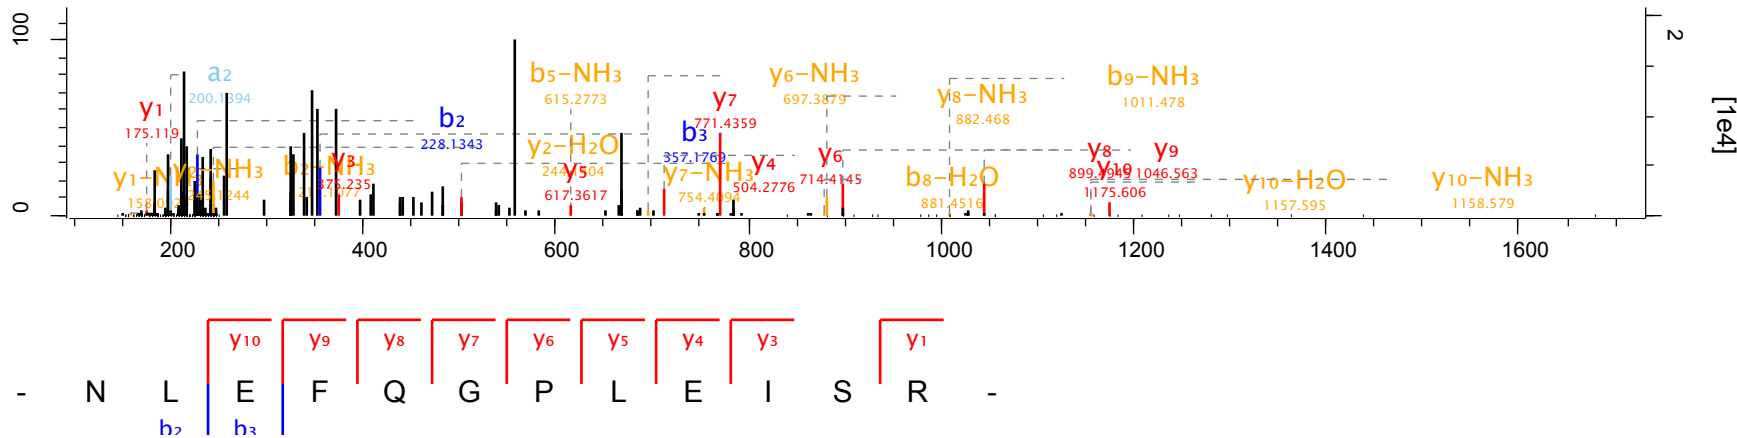

Raw file

Scan

Method

Score

m/z

Gene names

20140925\_fract18\_dyn\_5ul\_H2\_01\_453

28949

TOF; CID

81.77

1100.51

CEBPG

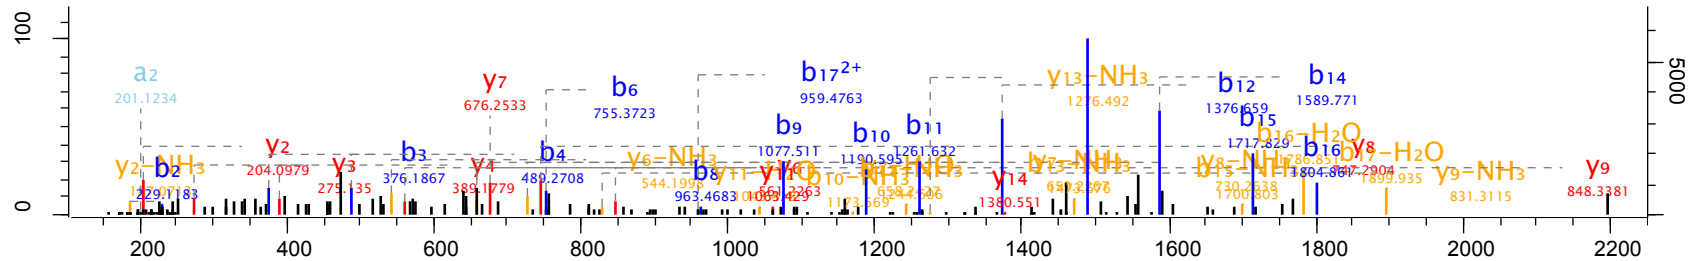

- D L F L E H A H N L A D N V Q S I S T E N

b<sub>2</sub>
b<sub>3</sub>
b<sub>4</sub>
b<sub>6</sub>
b<sub>8</sub>
b<sub>9</sub>
b<sub>10</sub>
b<sub>11</sub>
b<sub>12</sub>
b<sub>13</sub>
b<sub>14</sub>
b<sub>15</sub>
b<sub>16</sub>
b<sub>17</sub><sup>2+</sup>
y<sub>14</sub>
y<sub>11</sub>

Raw file

20140925\_fract18\_dyn\_5ul\_H2\_01\_453

Scan

30058

Method

TOF; CID

Score

62.47

m/z

633.81

Gene names

BACE1

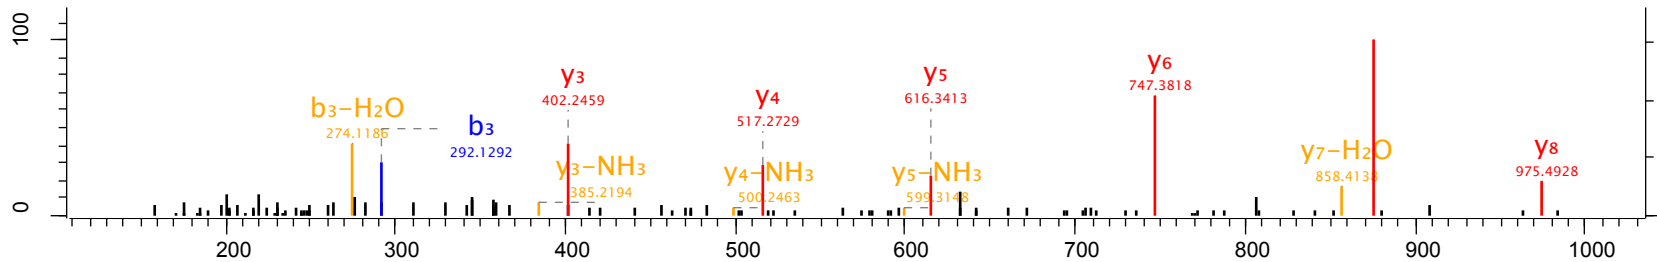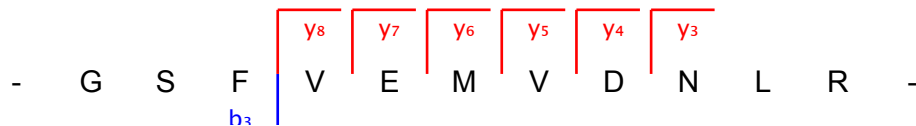

Raw file

Scan

Method

Score

m/z

Gene names

20140925\_fract18\_dyn\_5ul\_H2\_01\_453

32290

TOF; CID

77.22

968

EFHC1

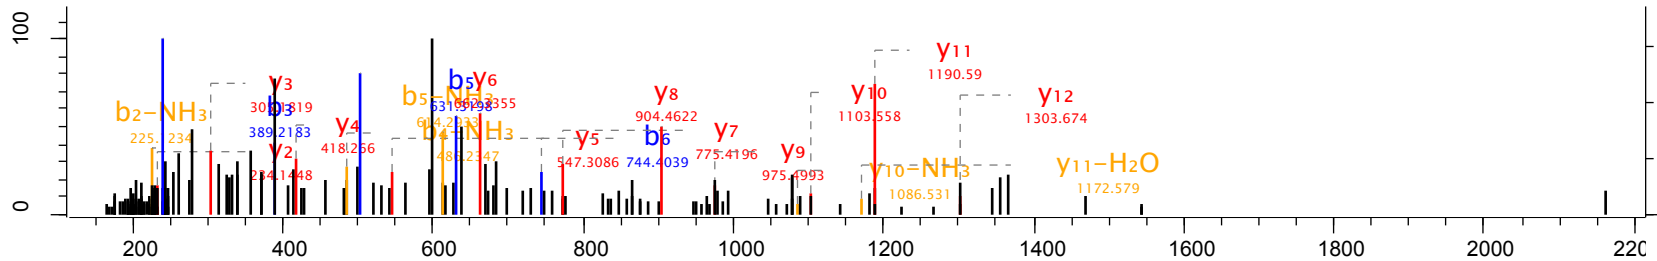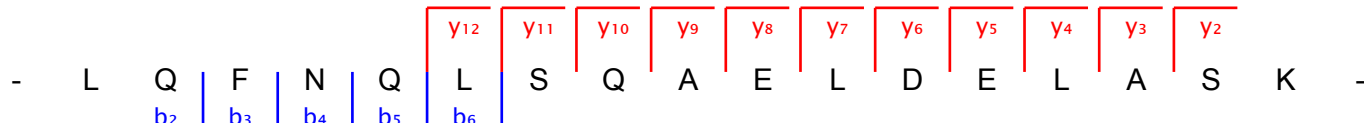

| Raw file                           | Scan  | Method   | Score | m/z    | Gene names |
|------------------------------------|-------|----------|-------|--------|------------|
| 20140925_fract18_dyn_5ul_H2_01_453 | 33602 | TOF; CID | 77.75 | 808.43 | NAA60      |

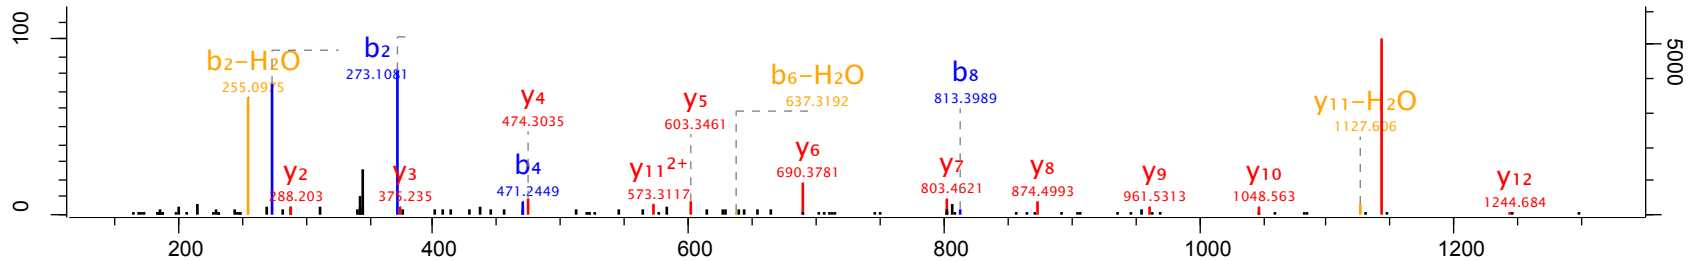

ac

- T E V V P S S A L S E V S L R -

b<sub>2</sub> | b<sub>3</sub> | b<sub>4</sub> | b<sub>8</sub>

y<sub>12</sub> | y<sub>11</sub> | y<sub>10</sub> | y<sub>9</sub> | y<sub>8</sub> | y<sub>7</sub> | y<sub>6</sub> | y<sub>5</sub> | y<sub>4</sub> | y<sub>3</sub> | y<sub>2</sub>



Raw file

20140925\_fract19\_dyn\_5ul\_H3\_01\_454

Scan

6187

Method

TOF; CID

Score

79.12

m/z

348.87

Gene names

ZNF12

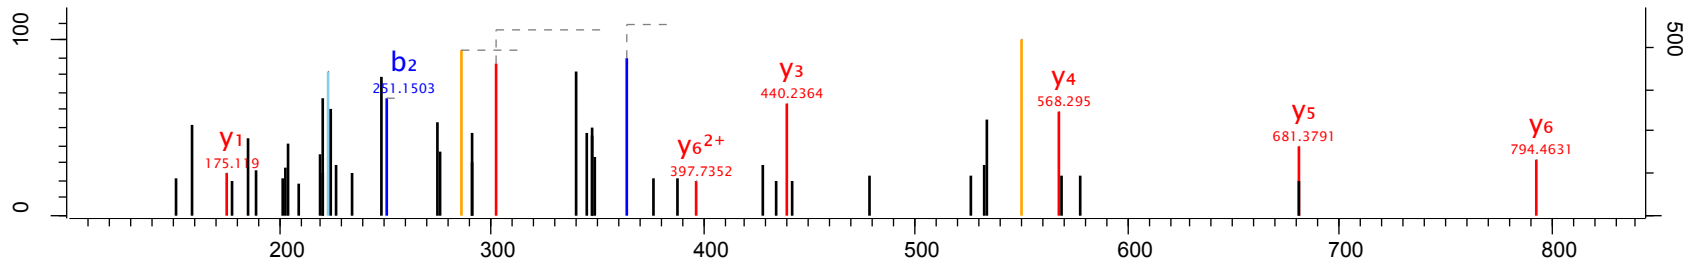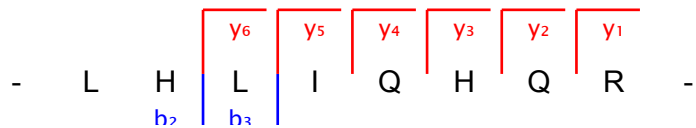

Raw file

Scan

Method

Score

m/z

Gene names

20140925\_fract19\_dyn\_5ul\_H3\_01\_454

9959

TOF; CID

49.45

431.23

C6orf136

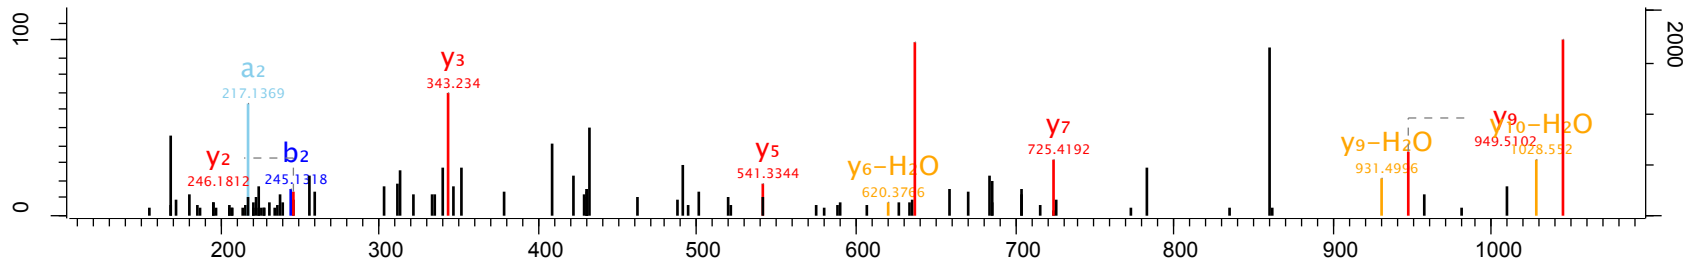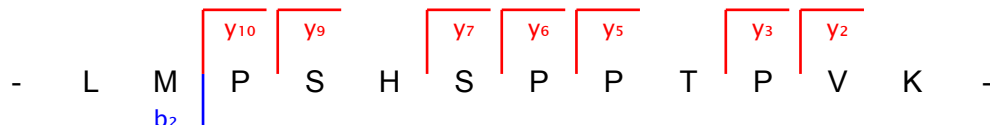

| Raw file                           | Scan  | Method   | Score | m/z    | Gene names |
|------------------------------------|-------|----------|-------|--------|------------|
| 20140925_fract19_dyn_5ul_H3_01_454 | 14659 | TOF; CID | 49.19 | 514.27 | TMEM53     |

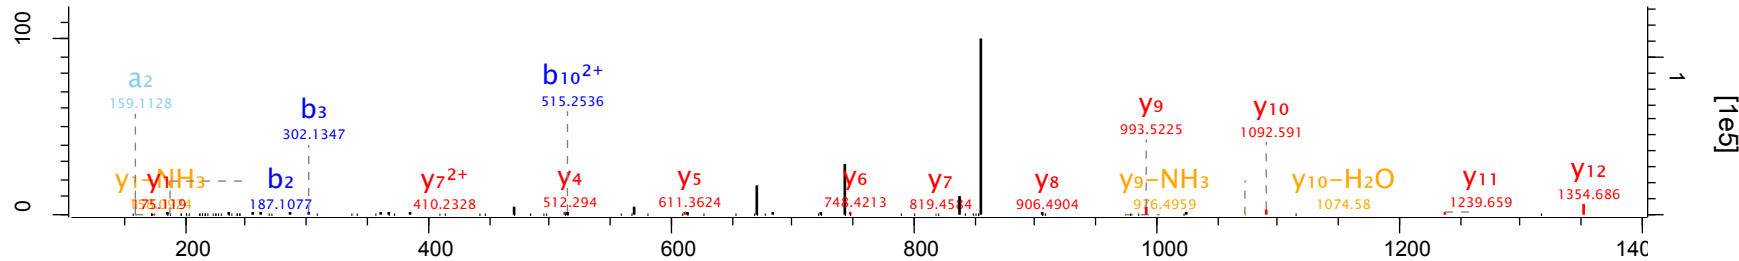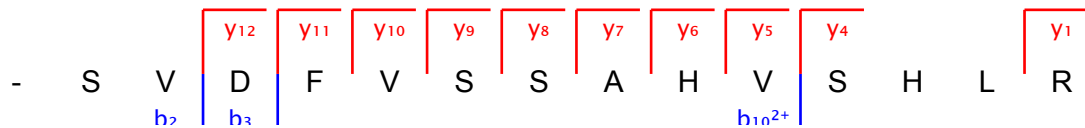

| Raw file                           | Scan  | Method   | Score | m/z   | Gene names |
|------------------------------------|-------|----------|-------|-------|------------|
| 20140925_fract19_dyn_5ul_H3_01_454 | 15075 | TOF; CID | 90.15 | 499.8 | DNAJB14    |

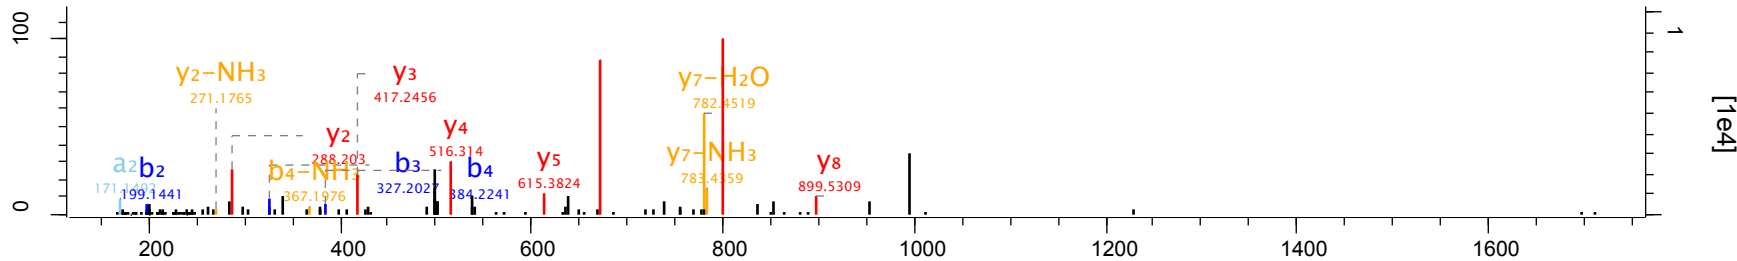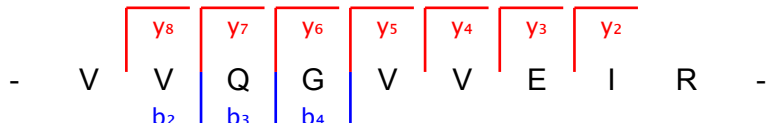

Raw file

20140925\_fract19\_dyn\_5ul\_H3\_01\_454

Scan

17579

Method

TOF; CID

Score

152.47

m/z

476.24

Gene names

MAPK15

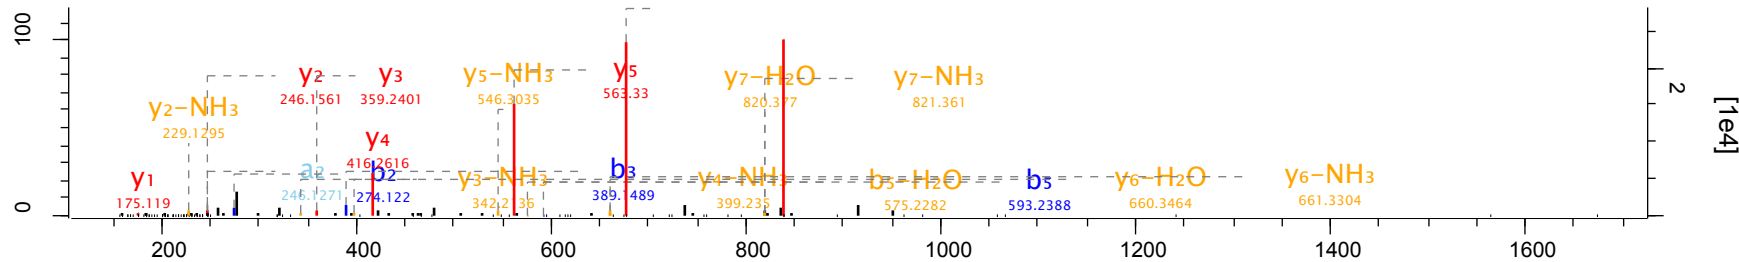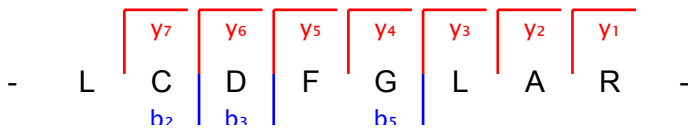

| Raw file                           | Scan  | Method   | Score  | m/z    | Gene names |
|------------------------------------|-------|----------|--------|--------|------------|
| 20140925_fract19_dyn_5ul_H3_01_454 | 18392 | TOF; CID | 130.04 | 510.78 | MAP2K5     |

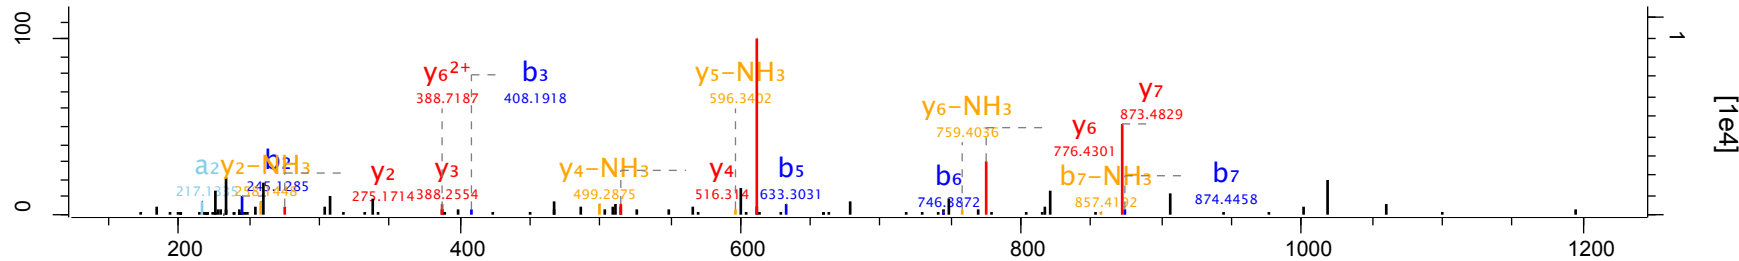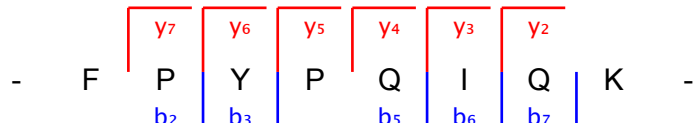

Raw file

20140925\_fract19\_dyn\_5ul\_H3\_01\_454

Scan

18582

Method

TOF; CID

Score

93.5

m/z

548.52

Gene names

ZDHHC24

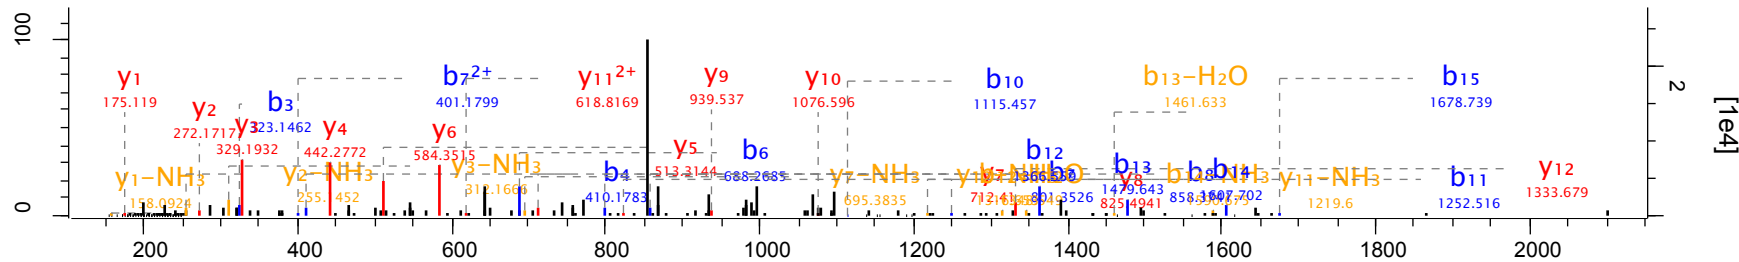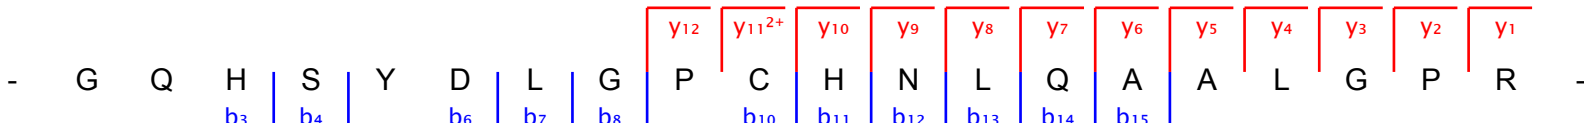

Raw file

20140925\_fract19\_dyn\_5ul\_H3\_01\_454

Scan

20773

Method

TOF; CID

Score

63.47

m/z

462.25

Gene names

EFCAB7

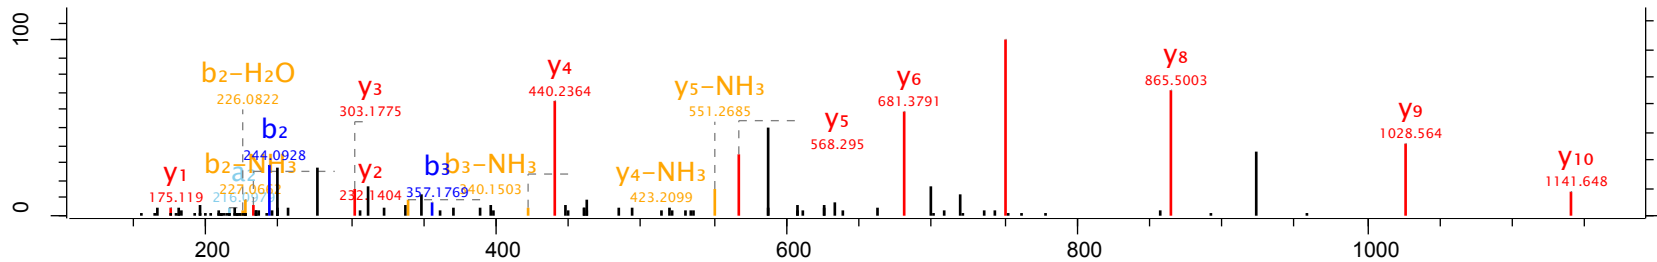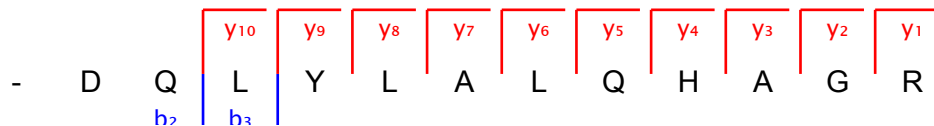



Raw file

Scan

Method

Score

m/z

Gene names

20140925\_fract19\_dyn\_5ul\_H3\_01\_454

23464

TOF; CID

73.93

771.36

FBXO17

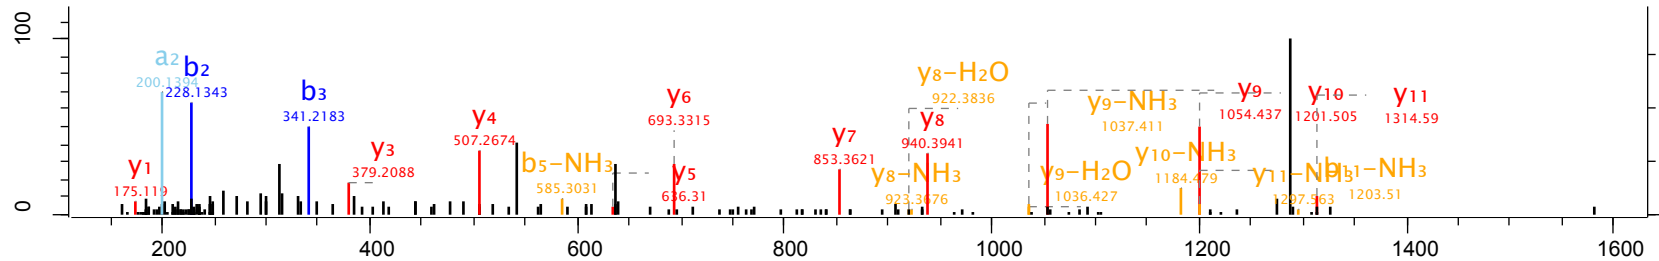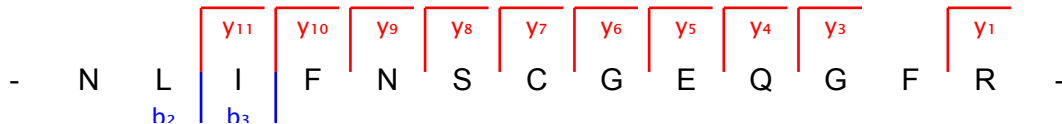

| Raw file                           | Scan  | Method   | Score | m/z    | Gene names |
|------------------------------------|-------|----------|-------|--------|------------|
| 20140925_fract19_dyn_5ul_H3_01_454 | 24558 | TOF; CID | 74.53 | 538.29 | S100P      |

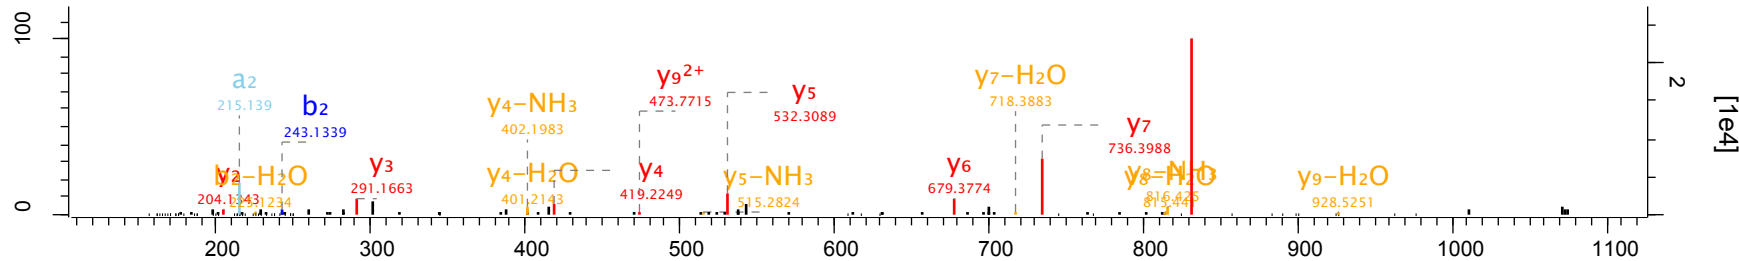

- E L P G F L Q S G K -

Fragmentation diagram showing the sequence of amino acids: E, L, P, G, F, L, Q, S, G, K. The L, P, G, F, L, Q, S, and G residues are grouped by red brackets above them, labeled y<sub>9</sub><sup>2+</sup>, y<sub>8</sub>, y<sub>7</sub>, y<sub>6</sub>, y<sub>5</sub>, y<sub>4</sub>, y<sub>3</sub>, and y<sub>2</sub> respectively. A blue bracket below the L residue is labeled b<sub>2</sub>.

Raw file

20140925\_fract19\_dyn\_5ul\_H3\_01\_454

Scan

26432

Method

TOF; CID

Score

42.64

m/z

712.7

Gene names

SDC3

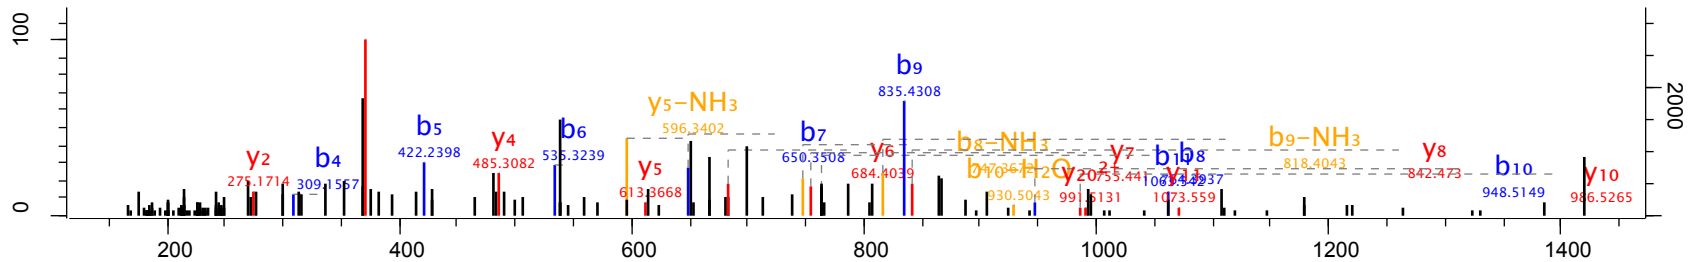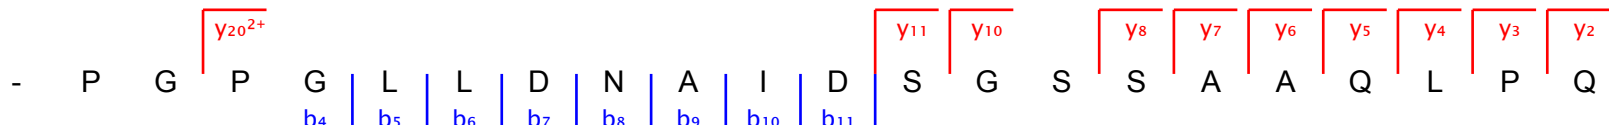

Raw file

20140925\_fract19\_dyn\_5ul\_H3\_01\_454

Scan

33397

Method

TOF; CID

Score

51.23

m/z

718.7

Gene names

BCL2L11

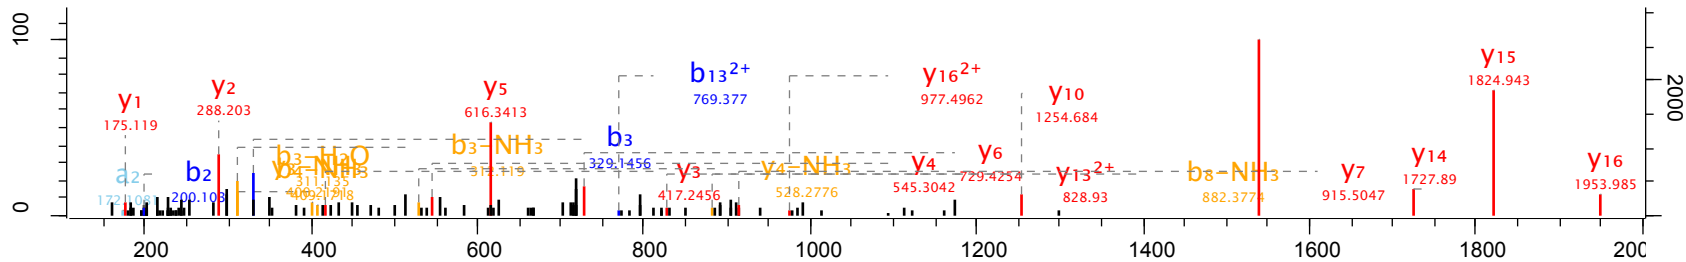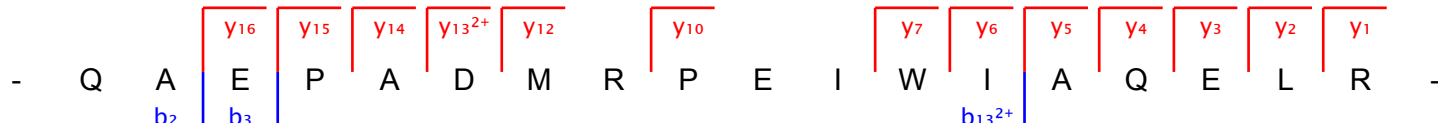

Raw file

20140925\_fract19\_dyn\_5ul\_H3\_01\_454

Scan

33877

Method

TOF; CID

Score

125.31

m/z

1319.1

Gene names

CHCHD10

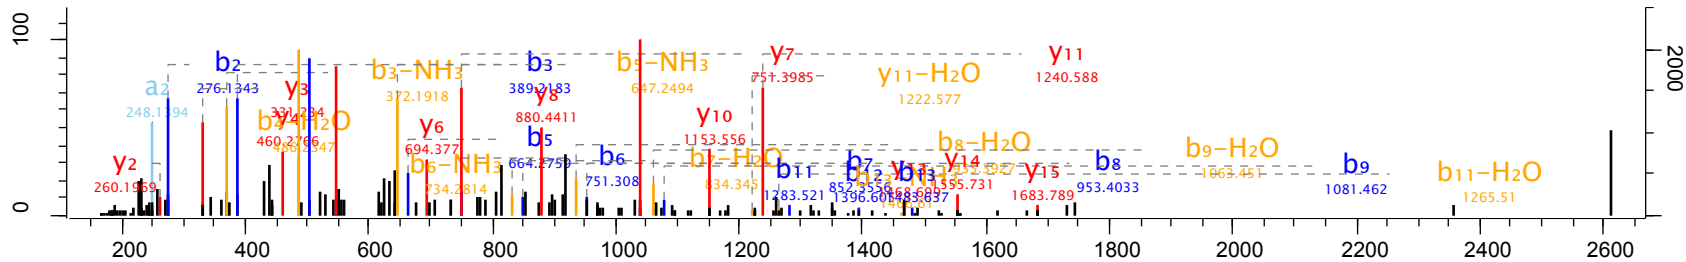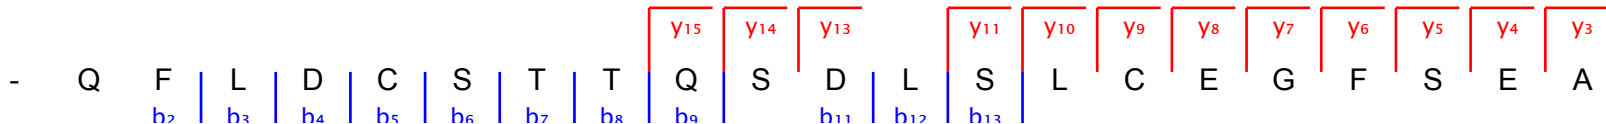

Raw file

20140925\_fract19\_dyn\_5ul\_H3\_01\_454

Scan

34248

Method

TOF; CID

Score

61.94

m/z

1091.52

Gene names

CDKN2AIPNL

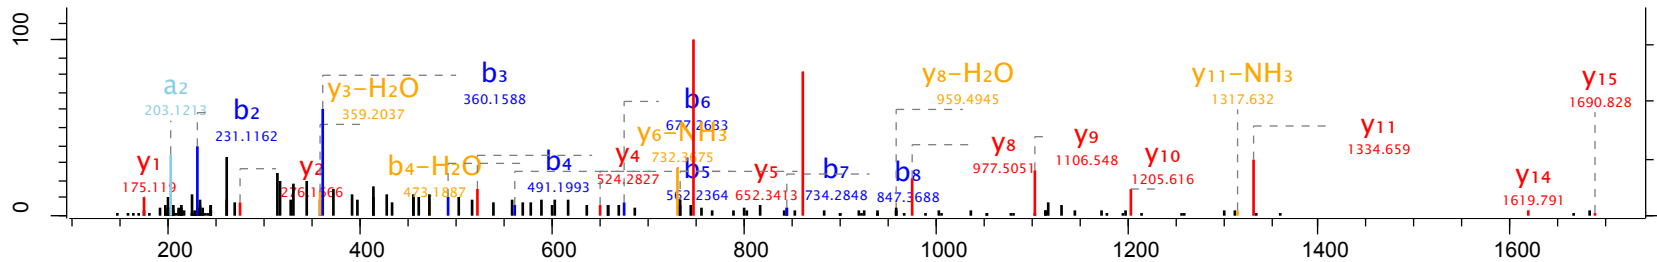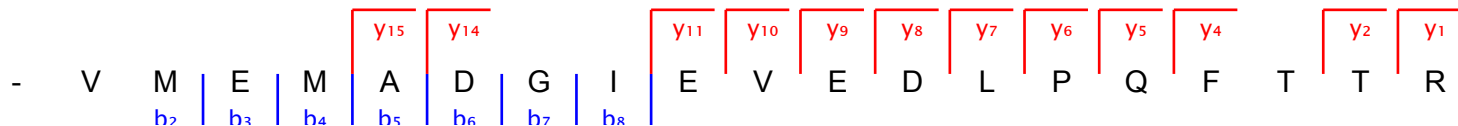

Raw file

20140925\_fract20\_dyn\_5ul\_H4\_01\_455

Scan

8917

Method

TOF; CID

Score

80.83

m/z

437.25

Gene names

KIAA1328

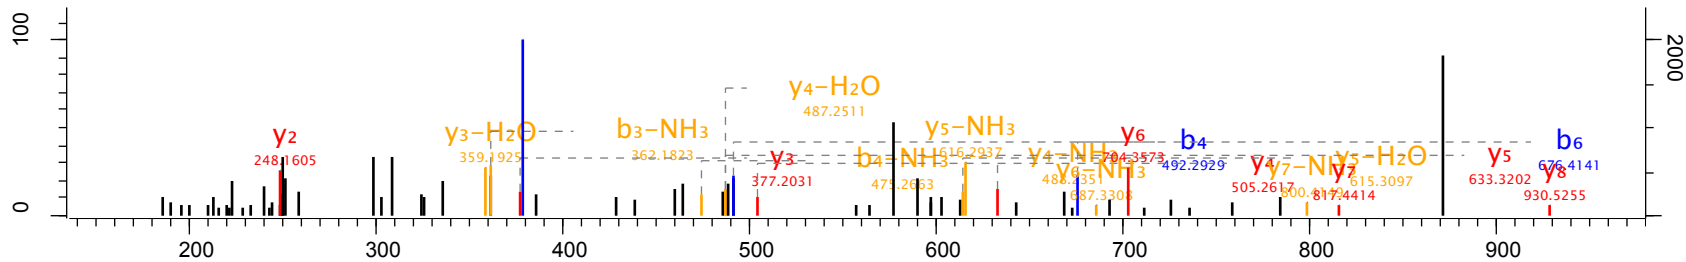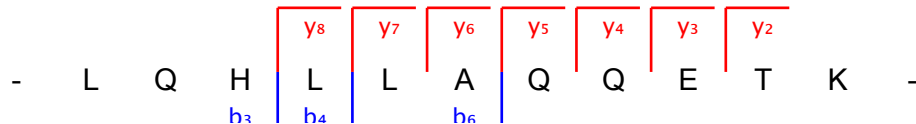

| Raw file                           | Scan | Method   | Score | m/z    | Gene names |
|------------------------------------|------|----------|-------|--------|------------|
| 20140925_fract20_dyn_5ul_H4_01_455 | 9852 | TOF; CID | 97.8  | 495.28 | ARID3B     |

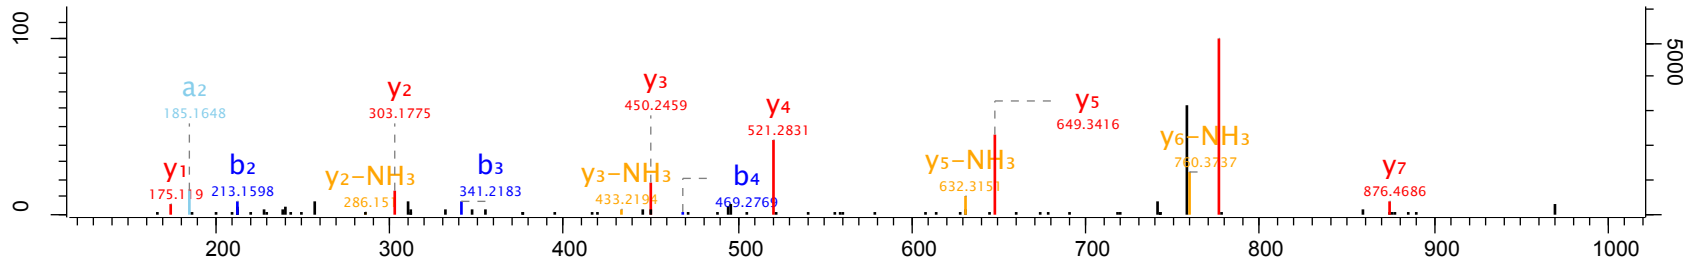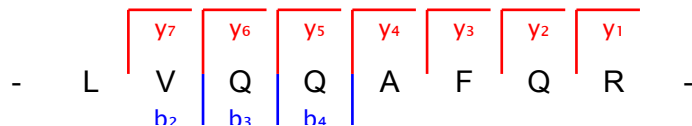



| Raw file                           | Scan  | Method   | Score | m/z    | Gene names |
|------------------------------------|-------|----------|-------|--------|------------|
| 20140925_fract20_dyn_5ul_H4_01_455 | 13873 | TOF; CID | 78.32 | 486.27 | MSRB3      |

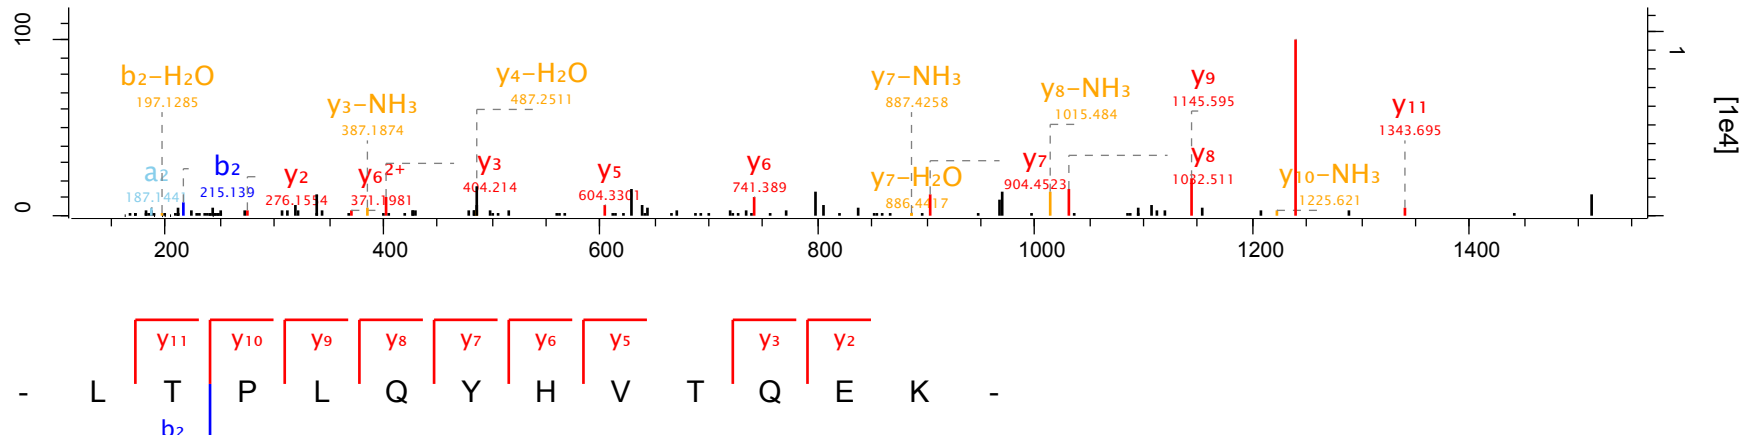

Raw file

20140925\_fract20\_dyn\_5ul\_H4\_01\_455

Scan

15079

Method

TOF; CID

Score

84

m/z

505.78

Gene names

NAIF1

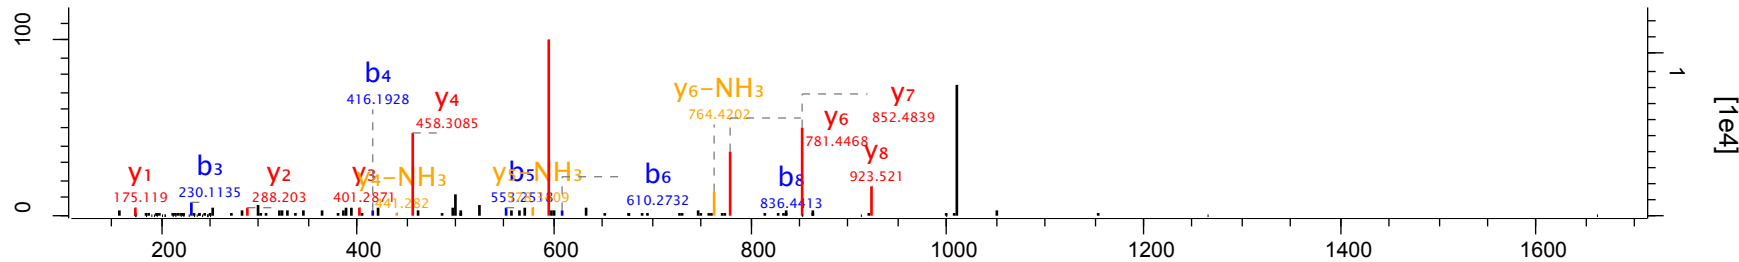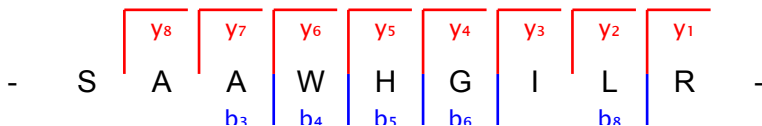

Raw file

20140925\_fract20\_dyn\_5ul\_H4\_01\_455

Scan

16399

Method

TOF; CID

Score

46.89

m/z

610.33

Gene names

SLC22A20

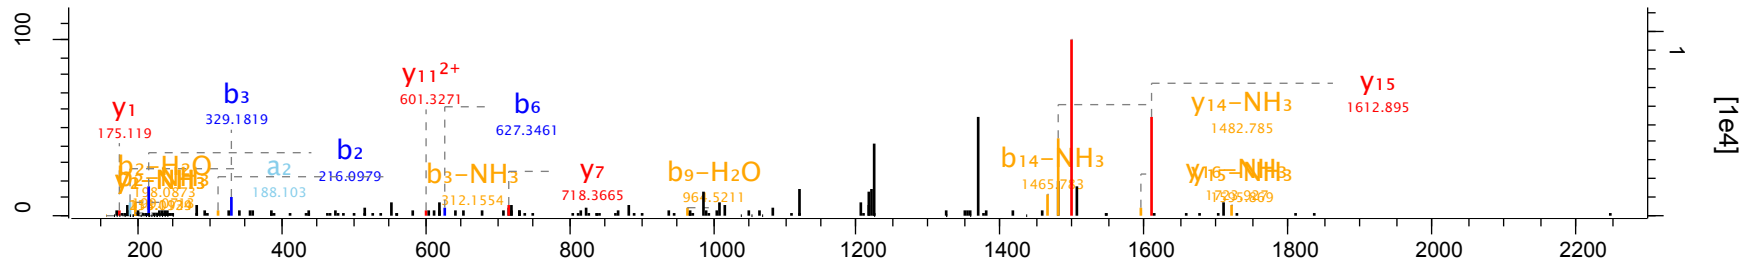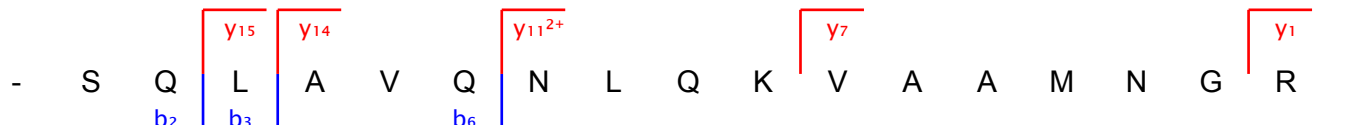

Raw file

20140925\_fract20\_dyn\_5ul\_H4\_01\_455

Scan

17586

Method

TOF; CID

Score

168.05

m/z

932.93

Gene names

ROMO1

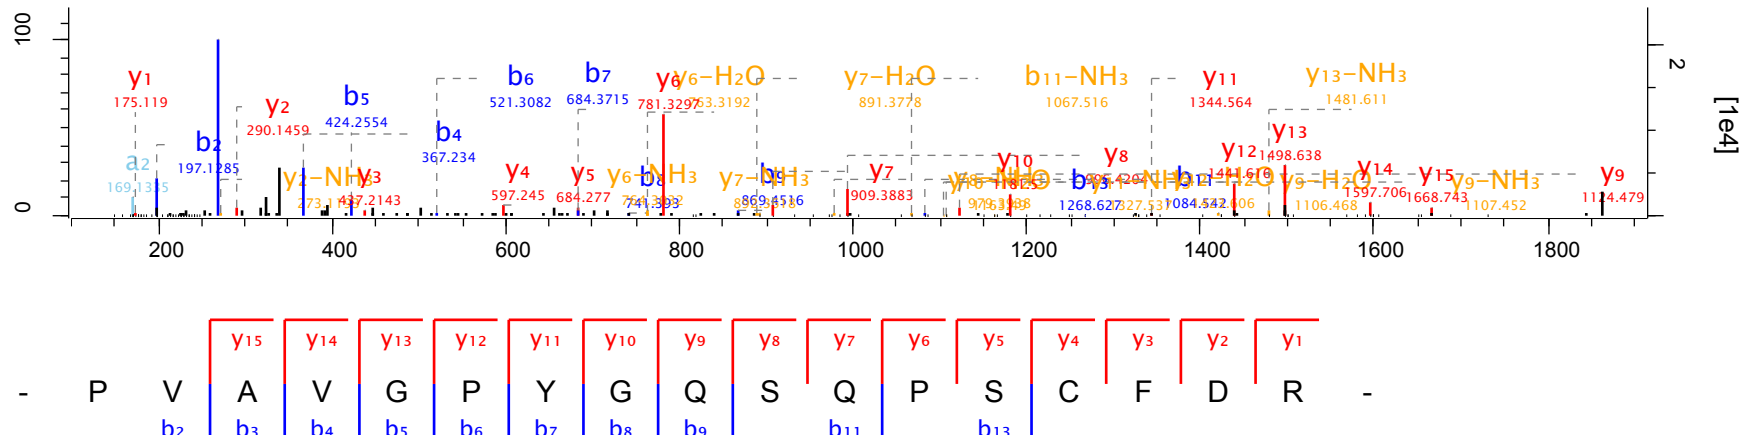

Raw file

20140925\_fract20\_dyn\_5ul\_H4\_01\_455

Scan

21001

Method

TOF; CID

Score

69.81

m/z

395.88

Gene names

CCDC65

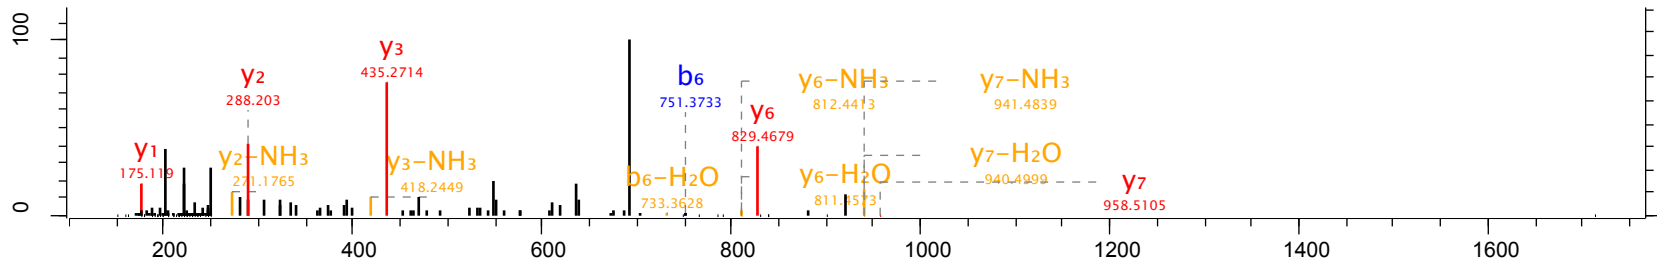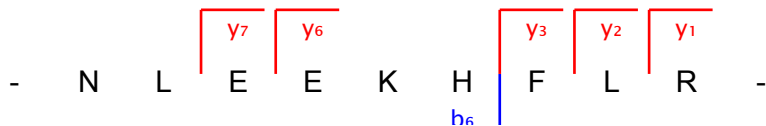

| Raw file                           | Scan  | Method   | Score | m/z    | Gene names |
|------------------------------------|-------|----------|-------|--------|------------|
| 20140925_fract20_dyn_5ul_H4_01_455 | 23305 | TOF; CID | 48.9  | 867.95 | FAM102A    |

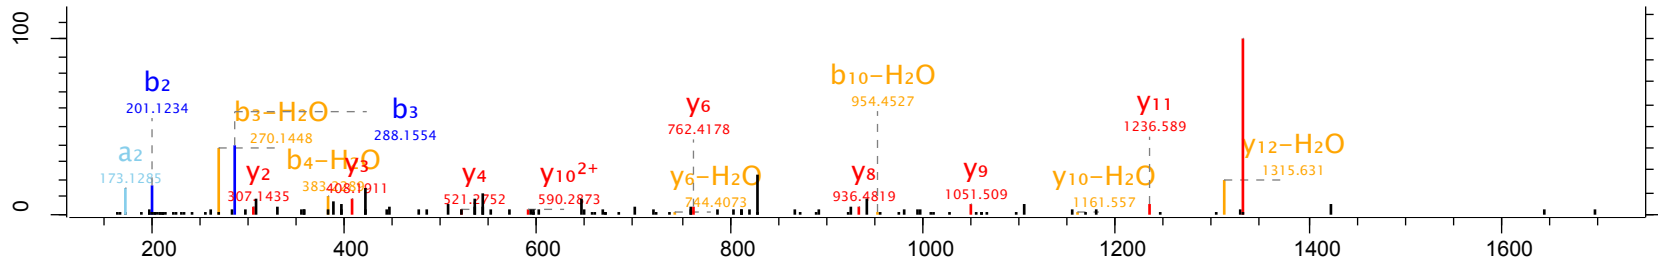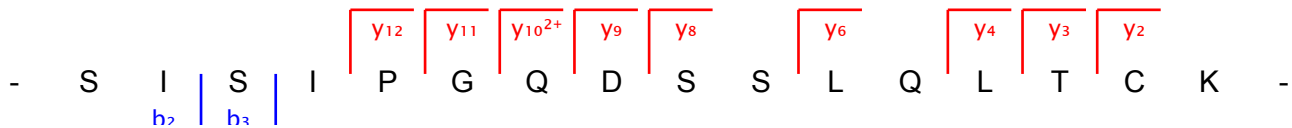

| Raw file                           | Scan  | Method   | Score | m/z    | Gene names |
|------------------------------------|-------|----------|-------|--------|------------|
| 20140925_fract20_dyn_5ul_H4_01_455 | 27402 | TOF; CID | 99.94 | 732.38 | SNAPC5     |

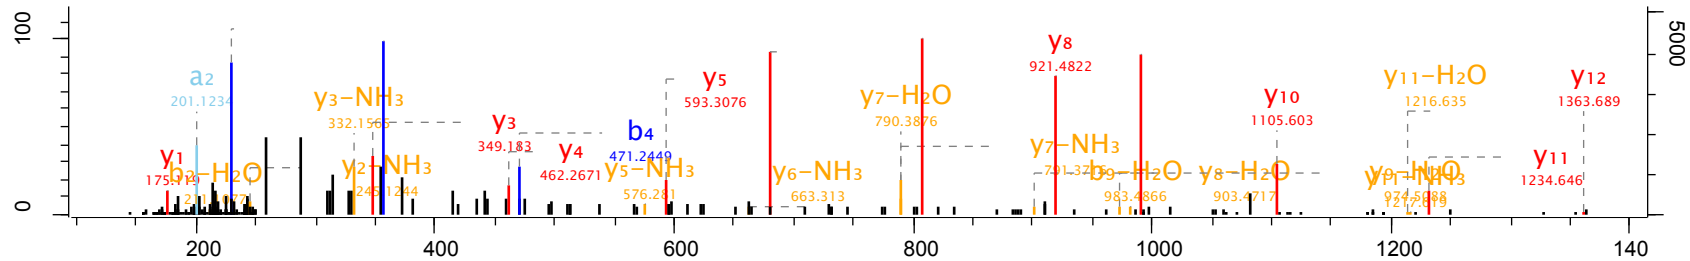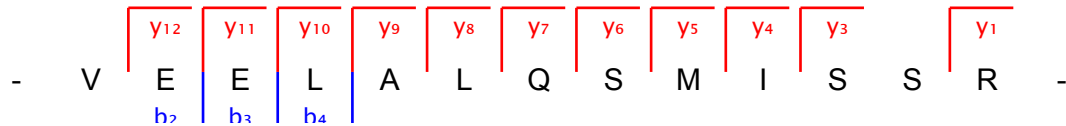

Raw file

20140925\_fract20\_dyn\_5ul\_H4\_01\_455

Scan

27466

Method

TOF; CID

Score

90.26

m/z

979.98

Gene names

FAM168A

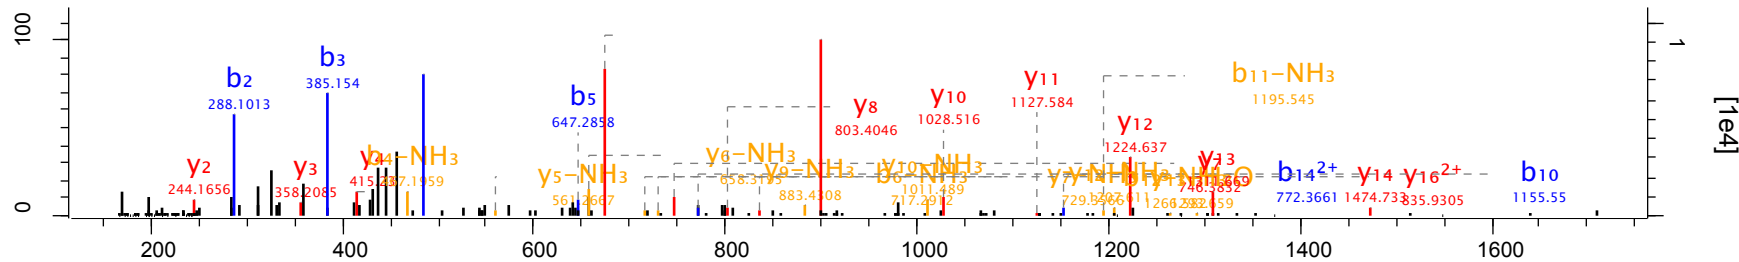

ac

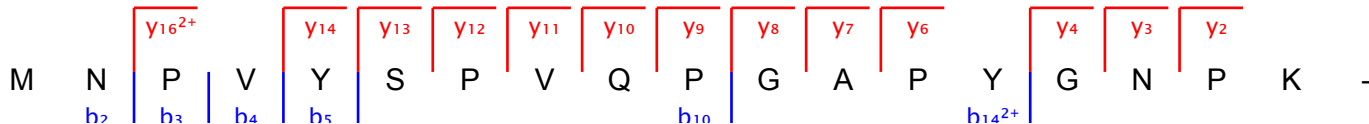



Raw file

20140925\_fract20\_dyn\_5ul\_H4\_01\_455

Scan

29308

Method

TOF; CID

Score

137.39

m/z

817.42

Gene names

SLC26A6

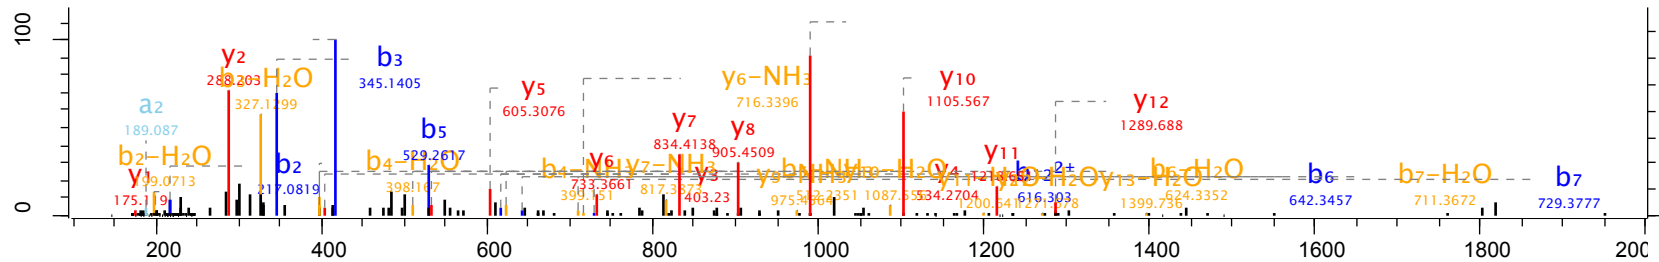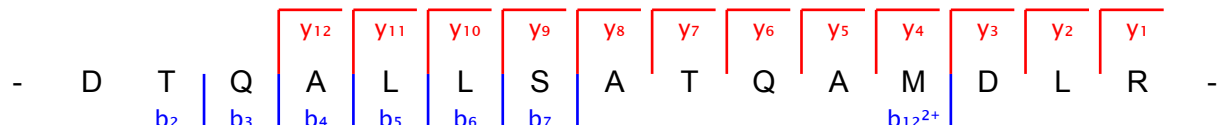

| Raw file                           | Scan  | Method   | Score | m/z    | Gene names |
|------------------------------------|-------|----------|-------|--------|------------|
| 20140925_fract20_dyn_5ul_H4_01_455 | 31205 | TOF; CID | 68    | 673.36 | CD82       |

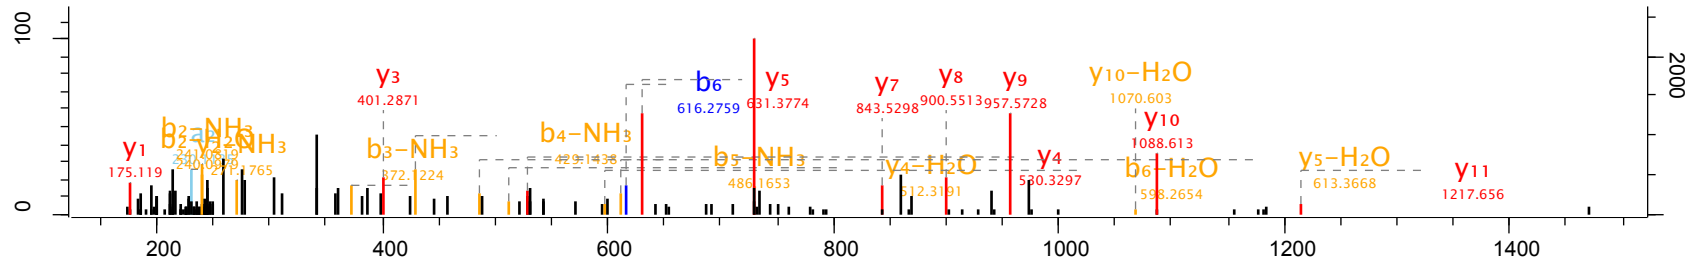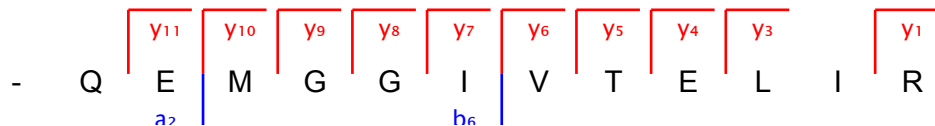

| Raw file                           | Scan  | Method   | Score | m/z     | Gene names |
|------------------------------------|-------|----------|-------|---------|------------|
| 20140925_fract20_dyn_5ul_H4_01_455 | 31520 | TOF; CID | 48.97 | 1230.11 | FAM219A    |

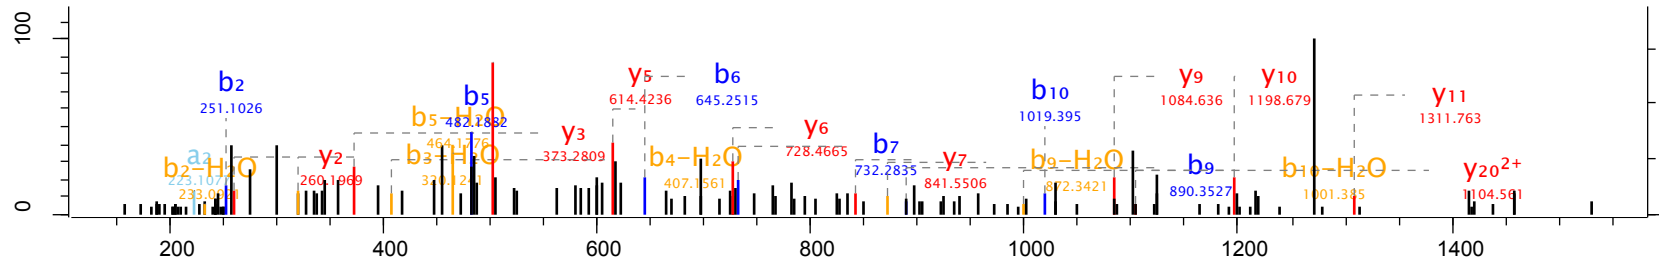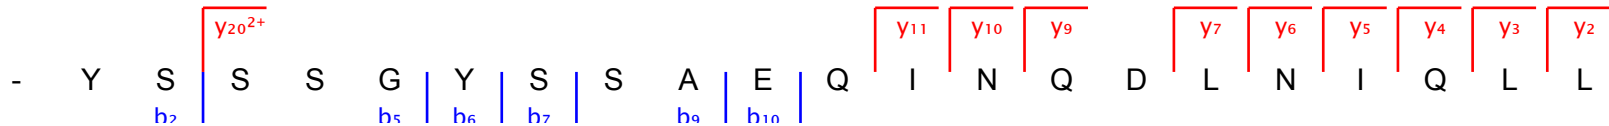

Raw file

20140925\_fract20\_dyn\_5ul\_H4\_01\_455

Scan

34894

Method

TOF; CID

Score

40.97

m/z

1073.57

Gene names

ULK4

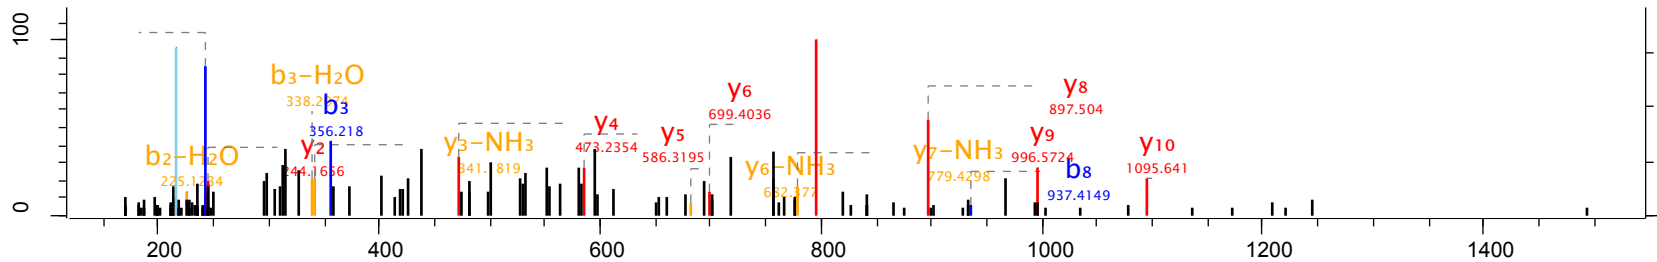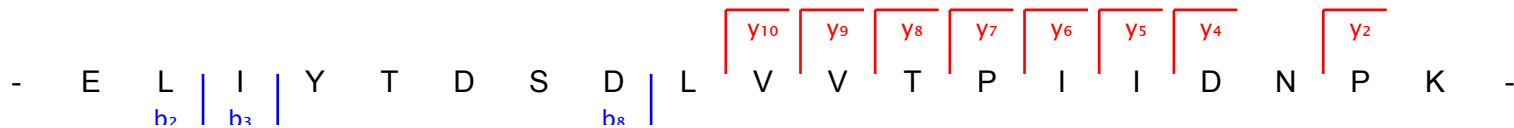

Raw file

20140925\_fract20\_dyn\_5ul\_H4\_01\_455

Scan

37382

Method

TOF; CID

Score

70.89

m/z

564.69

Gene names

SMIM11

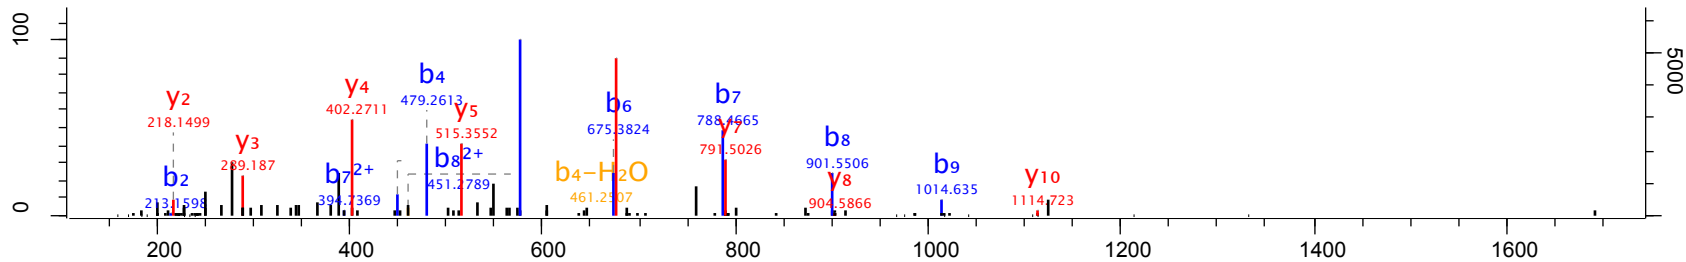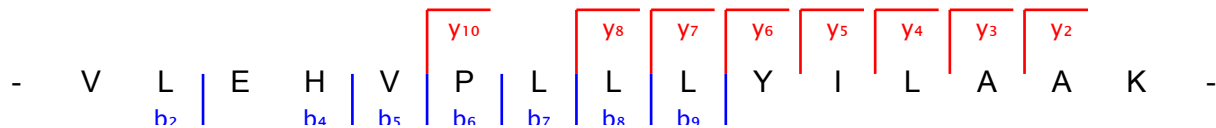

| Raw file                           | Scan  | Method   | Score  | m/z    | Gene names |
|------------------------------------|-------|----------|--------|--------|------------|
| 20140925_fract21_dyn_5ul_H5_01_456 | 16339 | TOF; CID | 115.71 | 565.34 | NIPA2      |

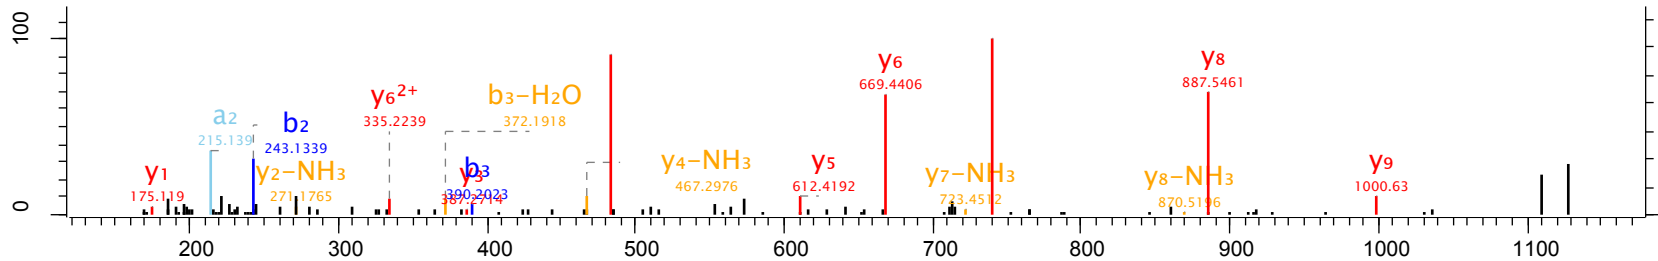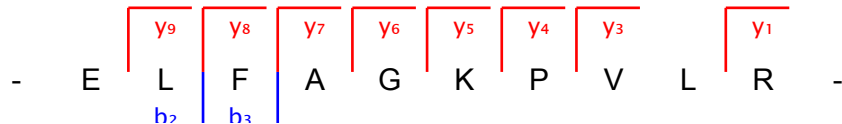

| Raw file                           | Scan  | Method   | Score | m/z    | Gene names |
|------------------------------------|-------|----------|-------|--------|------------|
| 20140925_fract21_dyn_5ul_H5_01_456 | 17882 | TOF; CID | 94.59 | 735.37 | AVP1       |

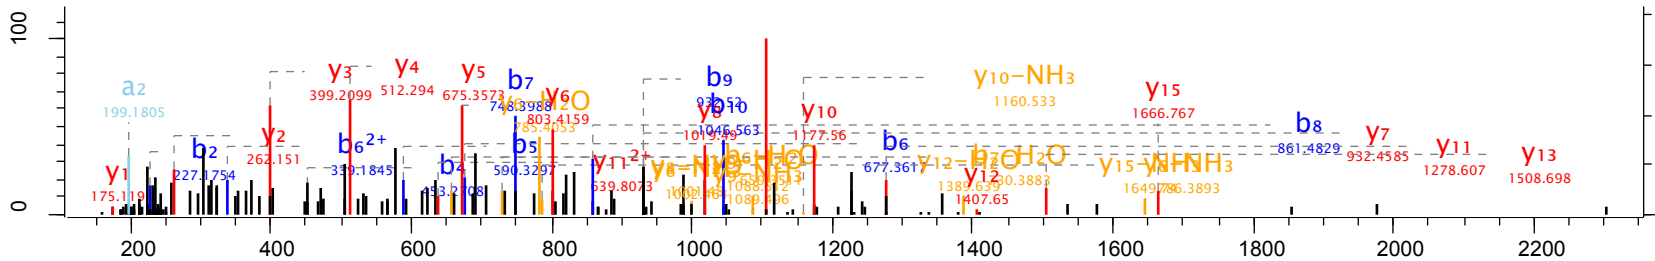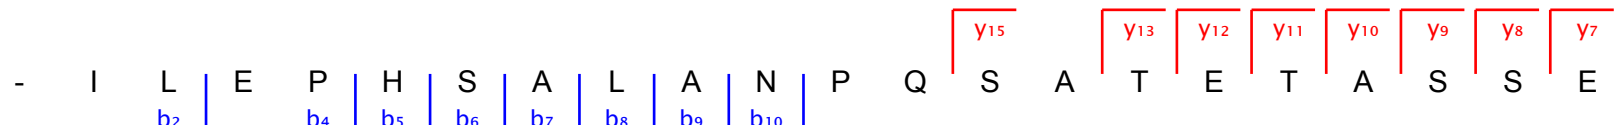

Raw file

20140925\_fract21\_dyn\_5ul\_H5\_01\_456

Scan

20846

Method

TOF; CID

Score

59.71

m/z

500.93

Gene names

USP40

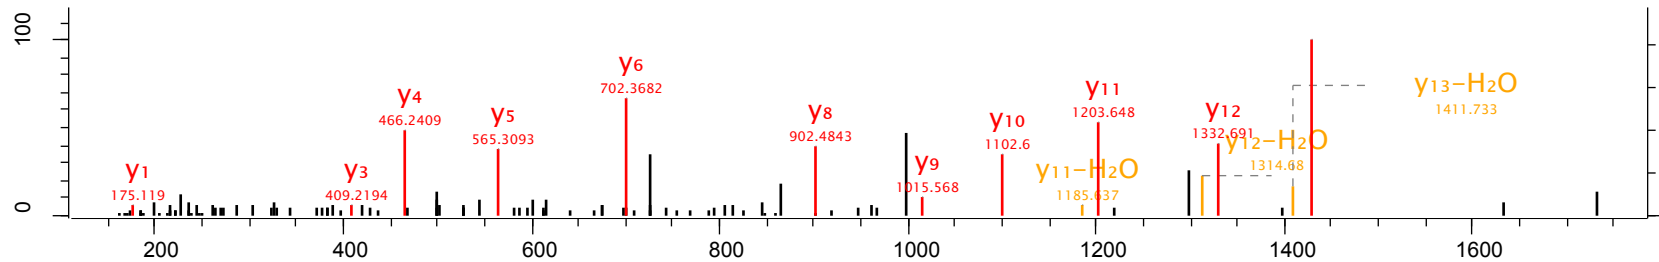

- A P E T S L S I H V G S F R -

Red brackets above the sequence indicate the following fragmentation sites: y13 (between P and E), y12 (between E and T), y11 (between T and S), y10 (between S and L), y9 (between L and S), y8 (between S and I), y6 (between I and H), y5 (between H and V), y4 (between V and G), y3 (between G and S), and y1 (between F and R).



| Raw file                           | Scan  | Method   | Score | m/z    | Gene names |
|------------------------------------|-------|----------|-------|--------|------------|
| 20140925_fract21_dyn_5ul_H5_01_456 | 23175 | TOF; CID | 42.12 | 741.03 | ZBTB8A     |

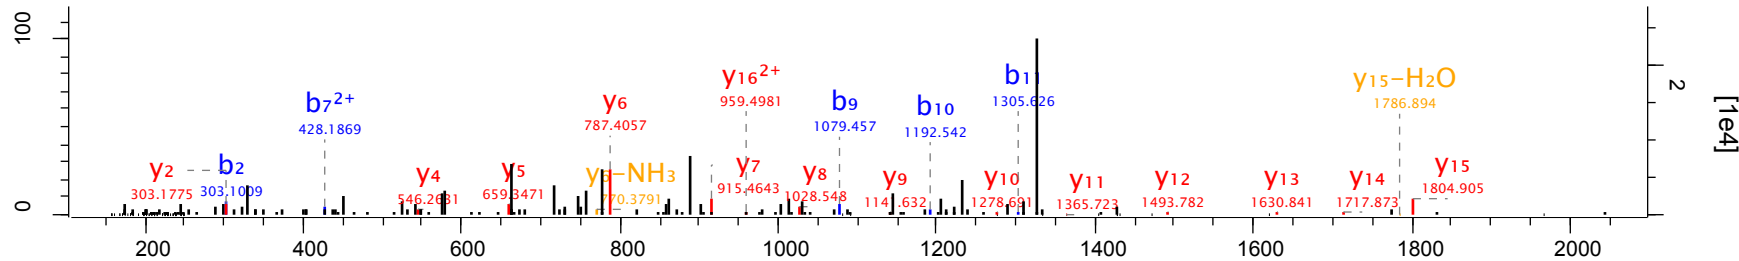

ac

- M E I S S H Q S H L L Q Q L N E Q R -

b<sub>2</sub> b<sub>7<sup>2+</sup></sub> b<sub>9</sub> b<sub>10</sub> b<sub>11</sub>

y<sub>2</sub> y<sub>4</sub> y<sub>5</sub> y<sub>6</sub> y<sub>7</sub> y<sub>8</sub> y<sub>9</sub> y<sub>10</sub> y<sub>11</sub> y<sub>12</sub> y<sub>13</sub> y<sub>14</sub> y<sub>15</sub> y<sub>16<sup>2+</sup></sub>

| Raw file                           | Scan  | Method   | Score | m/z    | Gene names |
|------------------------------------|-------|----------|-------|--------|------------|
| 20140925_fract21_dyn_5ul_H5_01_456 | 23785 | TOF; CID | 63.62 | 458.92 | CHRNA7     |

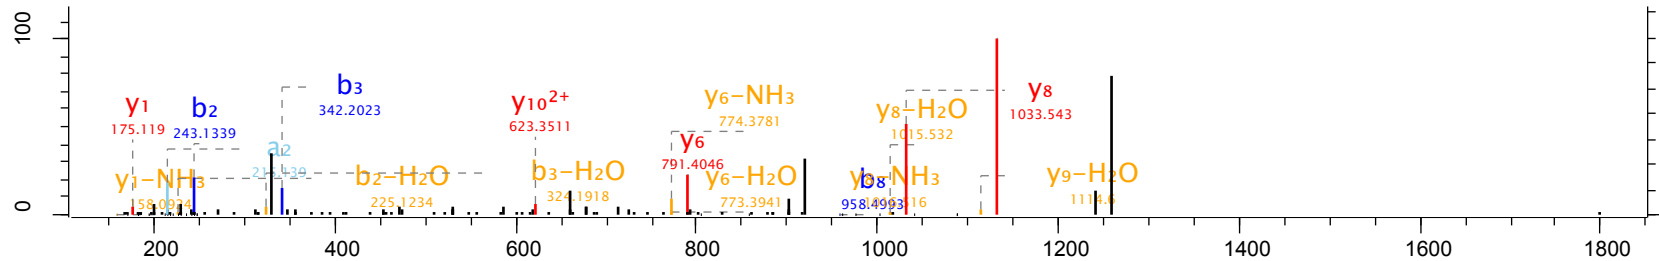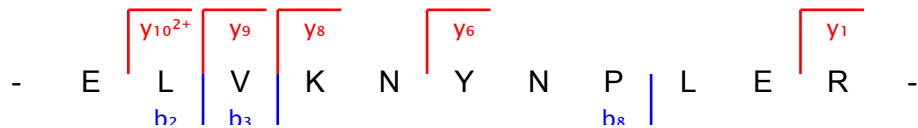

Raw file

20140925\_fract21\_dyn\_5ul\_H5\_01\_456

Scan

24059

Method

TOF; CID

Score

91.62

m/z

501.6

Gene names

HEMK1

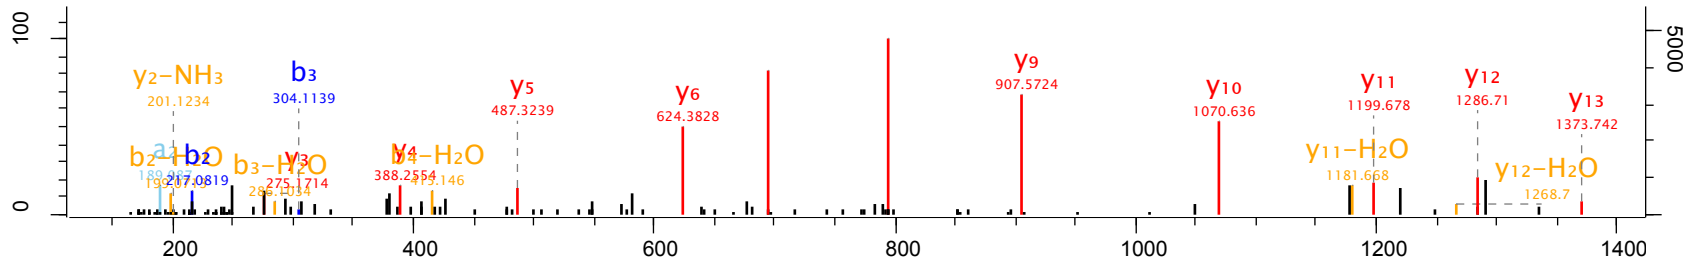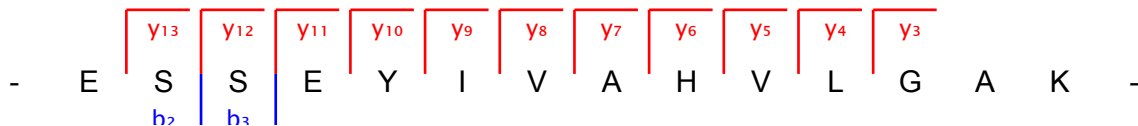

Raw file

Scan

Method

Score

m/z

Gene names

20140925\_fract21\_dyn\_5ul\_H5\_01\_456

26508

TOF; CID

61.11

833.41

IL10RB

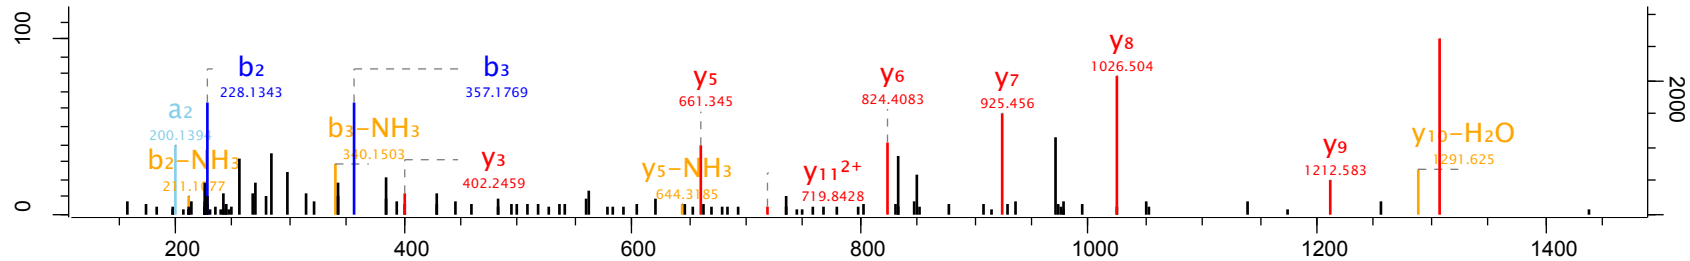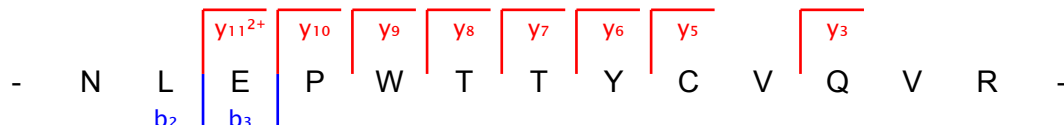

| Raw file                           | Scan  | Method   | Score | m/z    | Gene names |
|------------------------------------|-------|----------|-------|--------|------------|
| 20140925_fract21_dyn_5ul_H5_01_456 | 27714 | TOF; CID | 81.02 | 704.83 | OAF        |

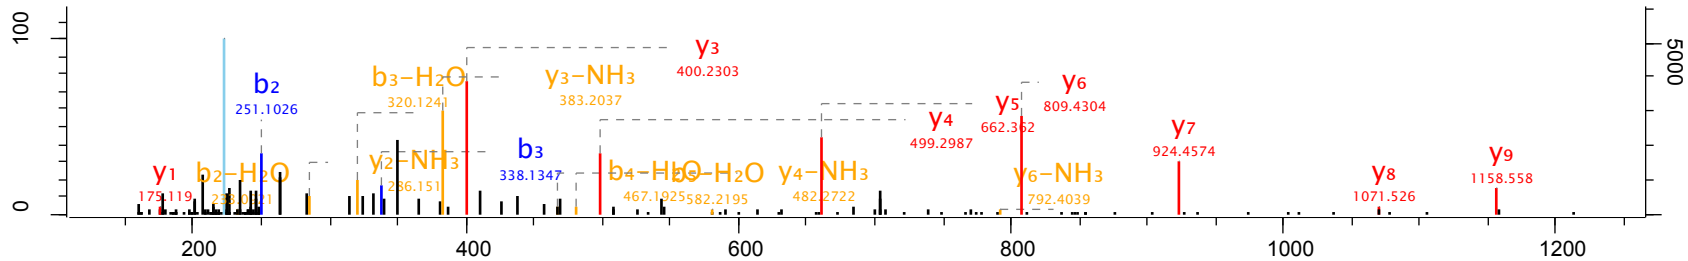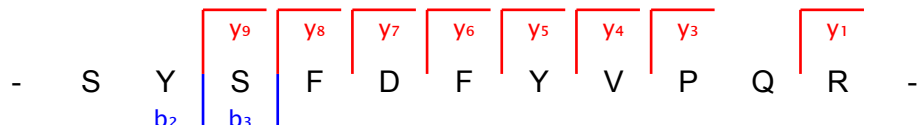

Raw file

20140925\_fract21\_dyn\_5ul\_H5\_01\_456

Scan

28121

Method

TOF; CID

Score

43.86

m/z

585.3

Gene names

TWSG1

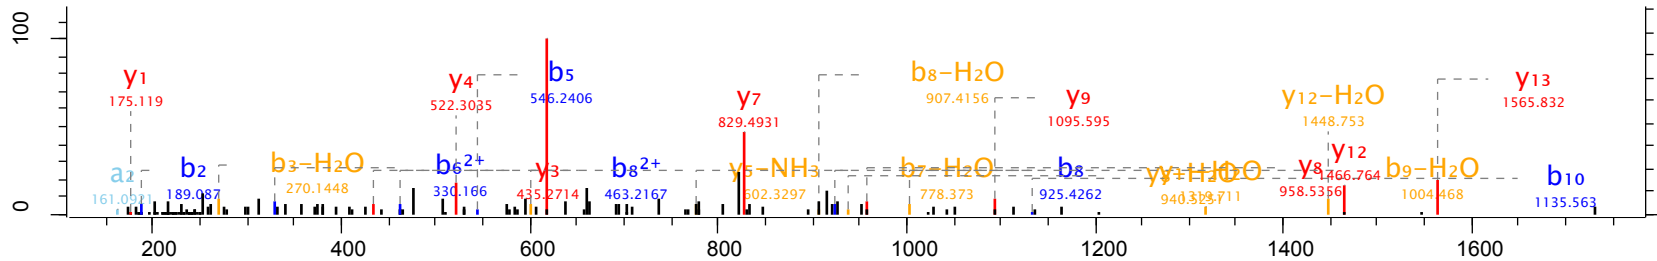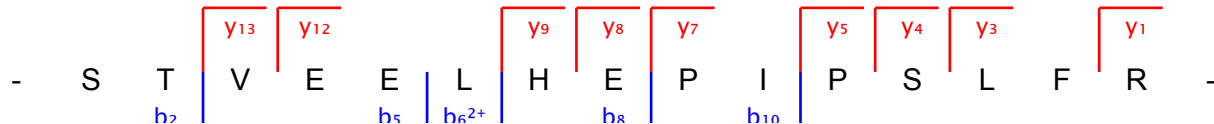

Raw file

Scan

Method

Score

m/z

Gene names

20140925\_fract22\_dyn\_5ul\_H6\_01\_457

13222

TOF; CID

70.91

513.26

ZNF740

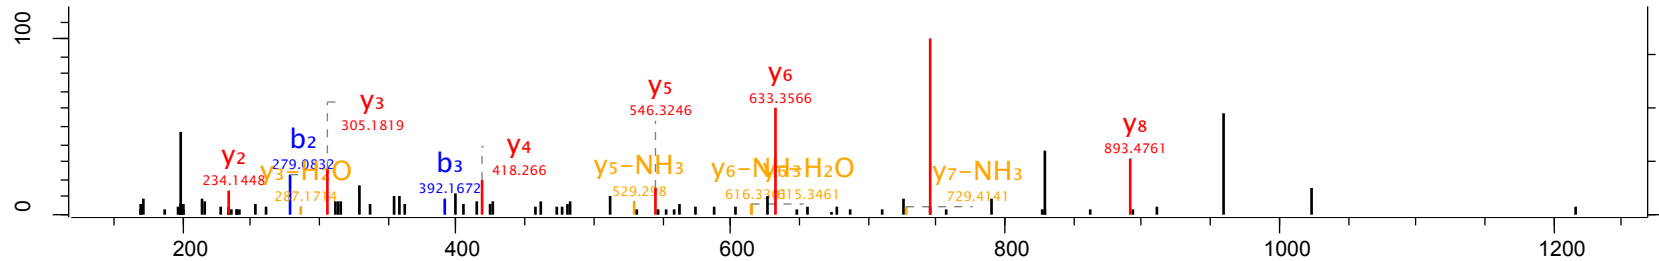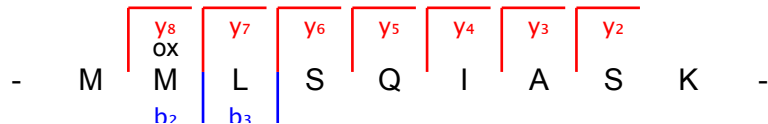

| Raw file                           | Scan  | Method   | Score  | m/z    | Gene names |
|------------------------------------|-------|----------|--------|--------|------------|
| 20140925_fract22_dyn_5ul_H6_01_457 | 15401 | TOF; CID | 128.38 | 504.33 | SNRNP35    |

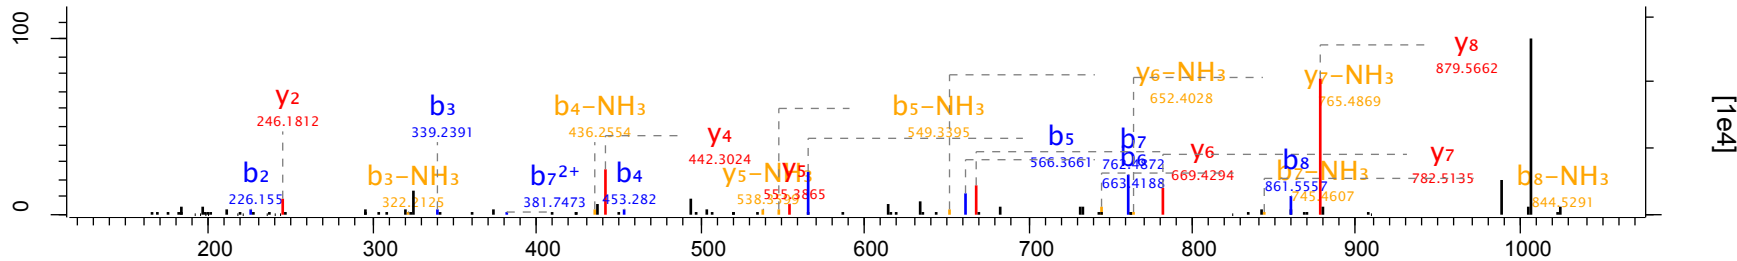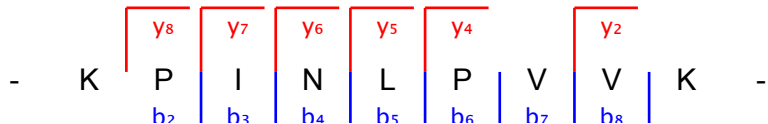



Raw file

20140925\_fract22\_dyn\_5ul\_H6\_01\_457

Scan

16966

Method

TOF; CID

Score

105.52

m/z

575.55

Gene names

SLC39A3

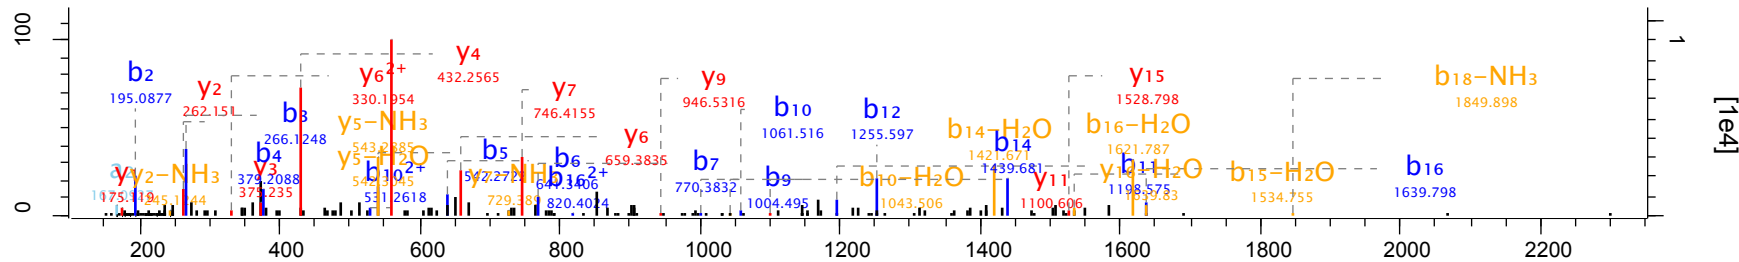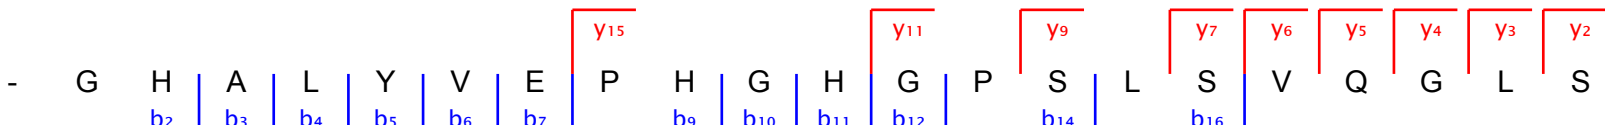

| Raw file                           | Scan  | Method   | Score | m/z    | Gene names |
|------------------------------------|-------|----------|-------|--------|------------|
| 20140925_fract22_dyn_5ul_H6_01_457 | 17733 | TOF; CID | 92.25 | 672.33 | XK         |

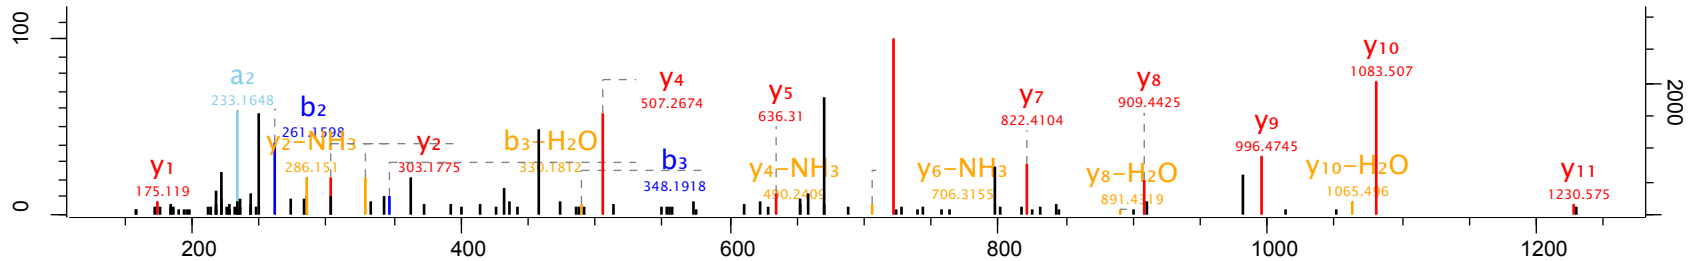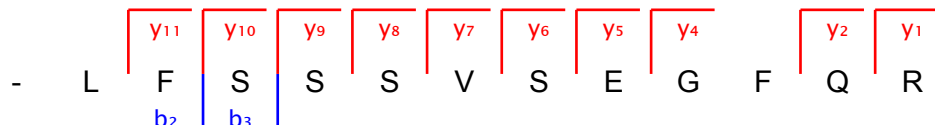

| Raw file                           | Scan  | Method   | Score  | m/z    | Gene names |
|------------------------------------|-------|----------|--------|--------|------------|
| 20140925_fract22_dyn_5ul_H6_01_457 | 21078 | TOF; CID | 120.55 | 509.28 | NLK        |

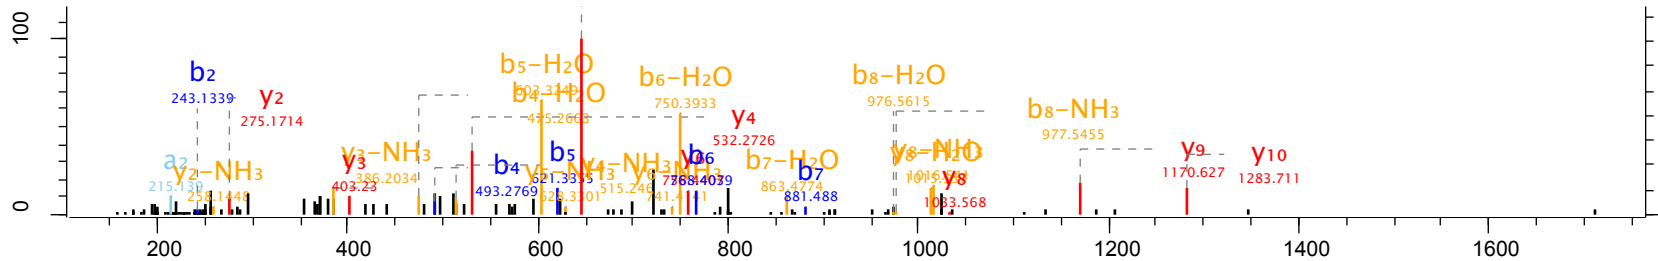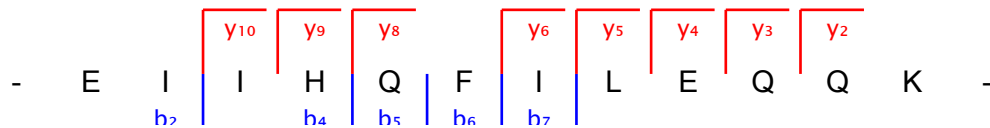

Raw file

20140925\_fract22\_dyn\_5ul\_H6\_01\_457

Scan

21715

Method

TOF; CID

Score

97.21

m/z

1101.48

Gene names

ELOF1

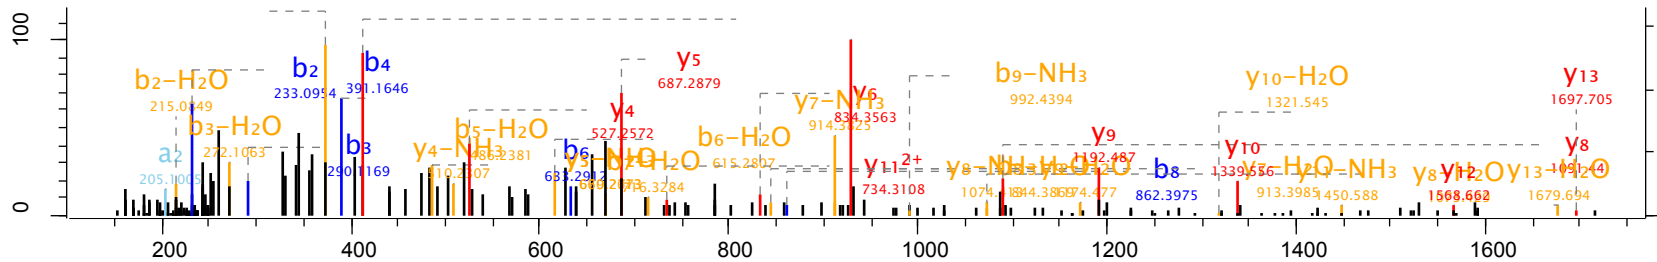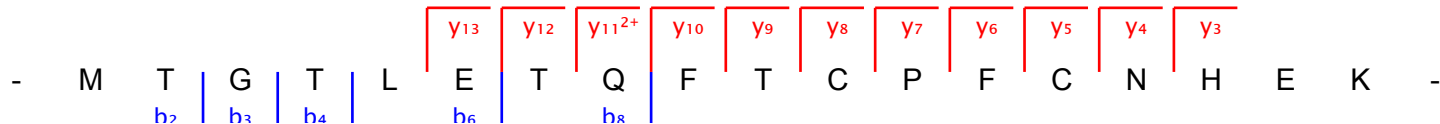

| Raw file                           | Scan  | Method   | Score | m/z   | Gene names |
|------------------------------------|-------|----------|-------|-------|------------|
| 20140925_fract22_dyn_5ul_H6_01_457 | 28654 | TOF; CID | 73.23 | 498.8 | ZNF114     |

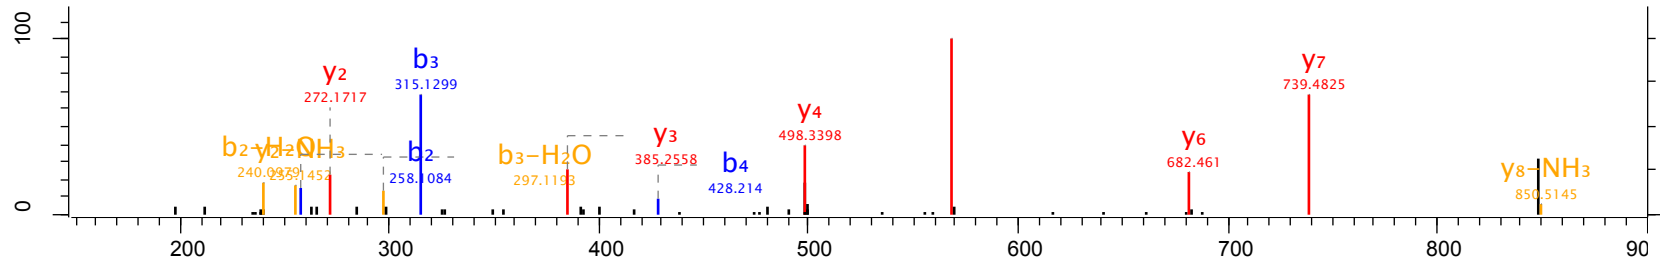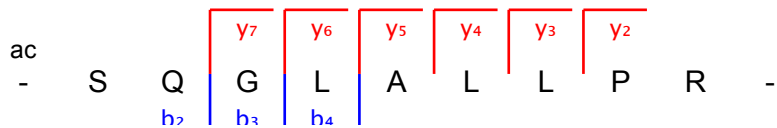

Raw file

20140925\_fract22\_dyn\_5ul\_H6\_01\_457

Scan

31286

Method

TOF; CID

Score

93.37

m/z

570.82

Gene names

FIGN

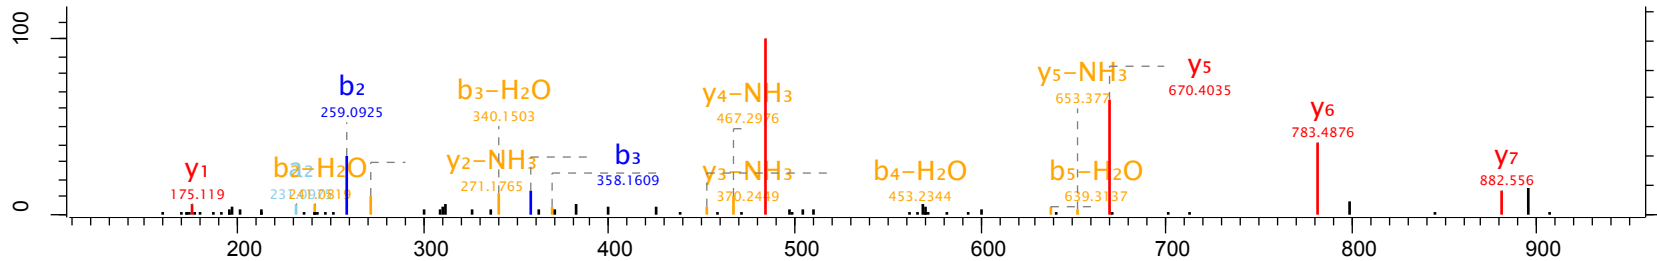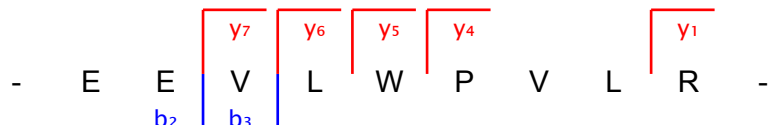

Raw file

20140925\_fract22\_dyn\_5ul\_H6\_01\_457

Scan

31800

Method

TOF; CID

Score

64.24

m/z

814.39

Gene names

TSPAN1

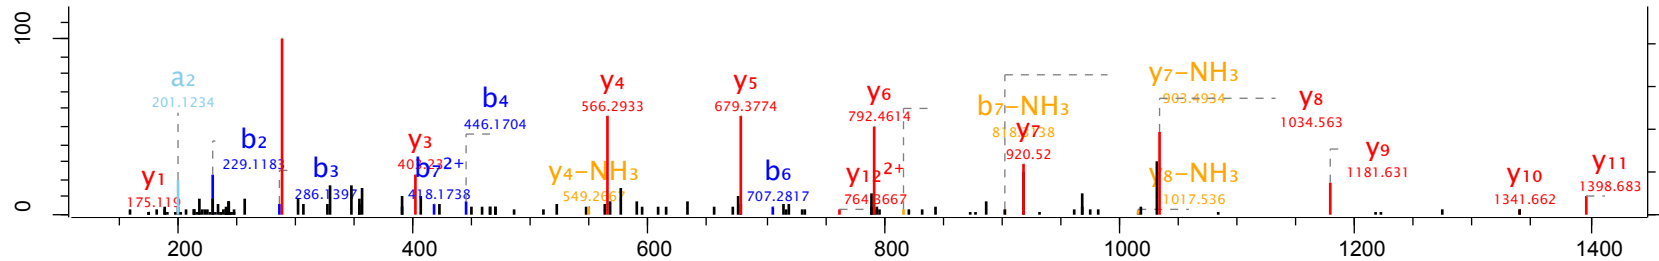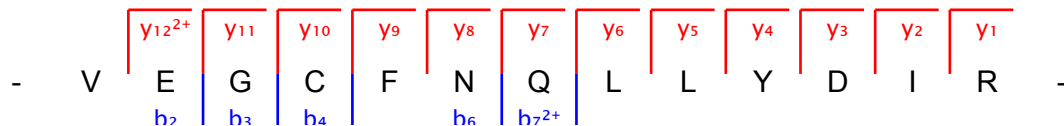

| Raw file                           | Scan  | Method   | Score | m/z    | Gene names |
|------------------------------------|-------|----------|-------|--------|------------|
| 20140925_fract23_dyn_5ul_H7_01_458 | 10320 | TOF; CID | 76.23 | 450.27 | SOX4       |

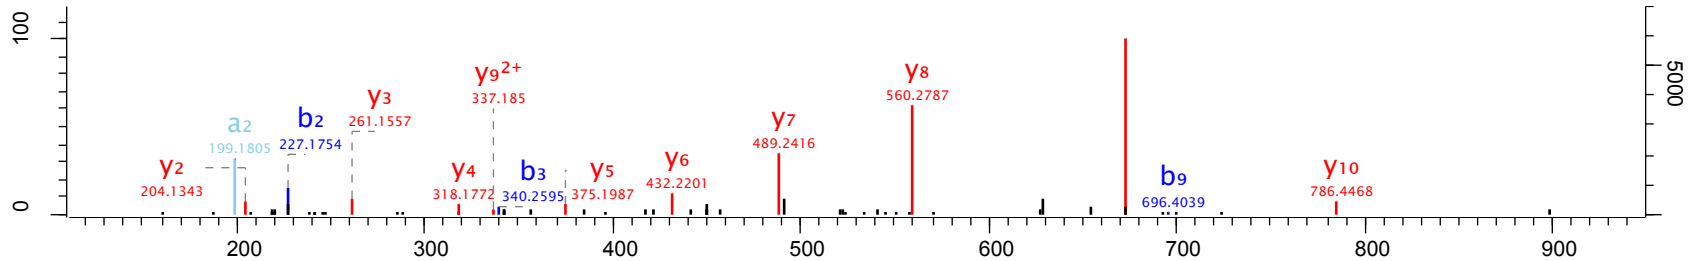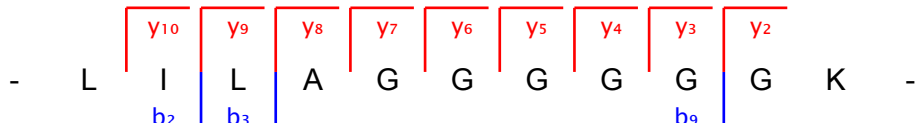



Raw file

Scan

Method

Score

m/z

Gene names

20140925\_fract23\_dyn\_5ul\_H7\_01\_458

13516

TOF; CID

93.62

625.87

FKRP

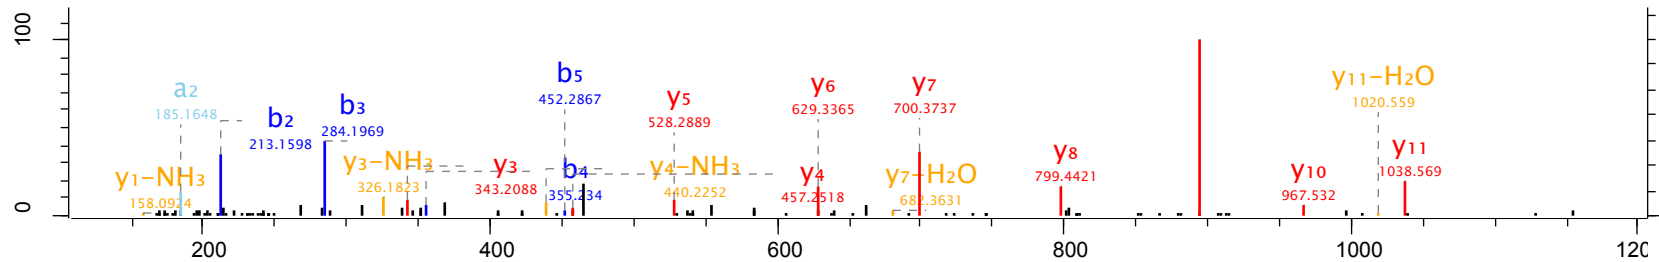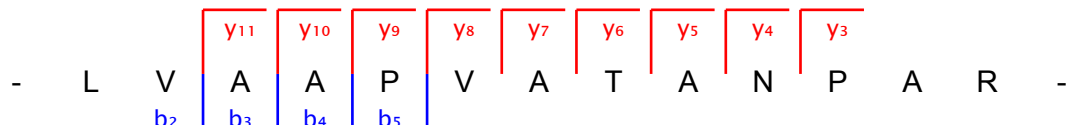

Raw file

20140925\_fract23\_dyn\_5ul\_H7\_01\_458

Scan

18044

Method

TOF; CID

Score

58.1

m/z

448.56

Gene names

B9D1

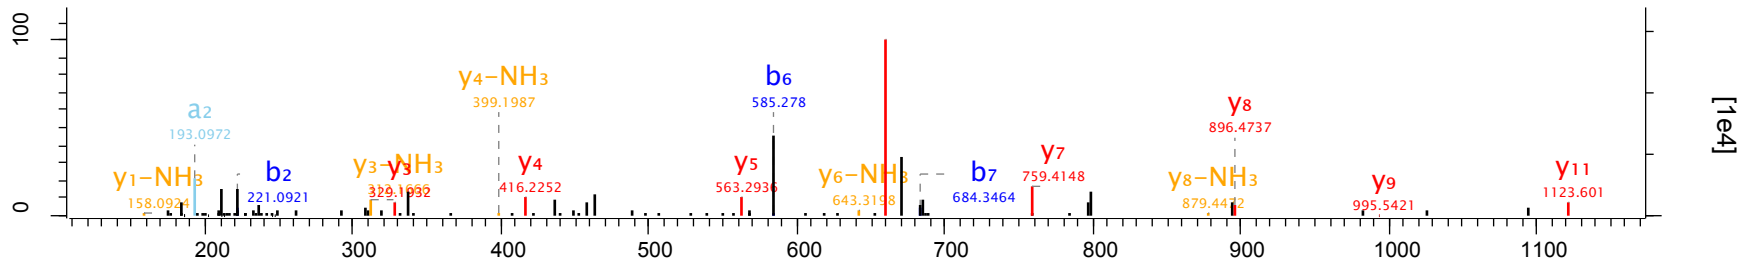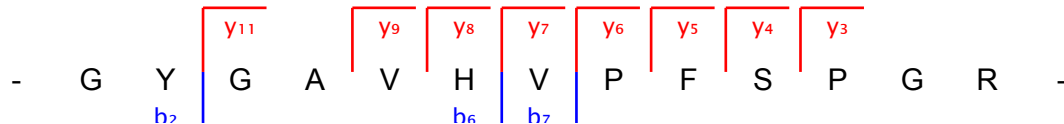

Raw file

20140925\_fract23\_dyn\_5ul\_H7\_01\_458

Scan

19417

Method

TOF; CID

Score

66.22

m/z

554.93

Gene names

MANEAL

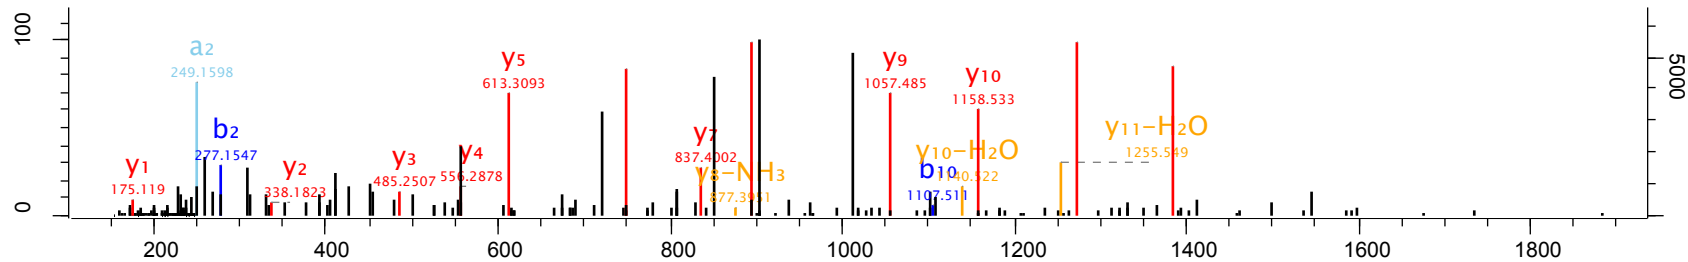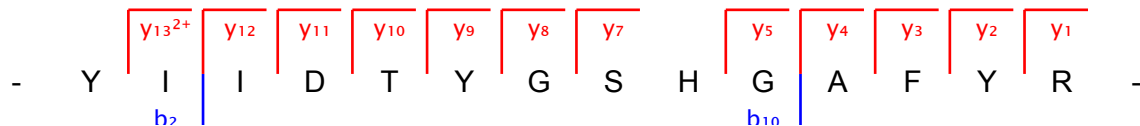

Raw file

20140925\_fract23\_dyn\_5ul\_H7\_01\_458

Scan

20113

Method

TOF; CID

Score

62.68

m/z

800.44

Gene names

ZCCHC10

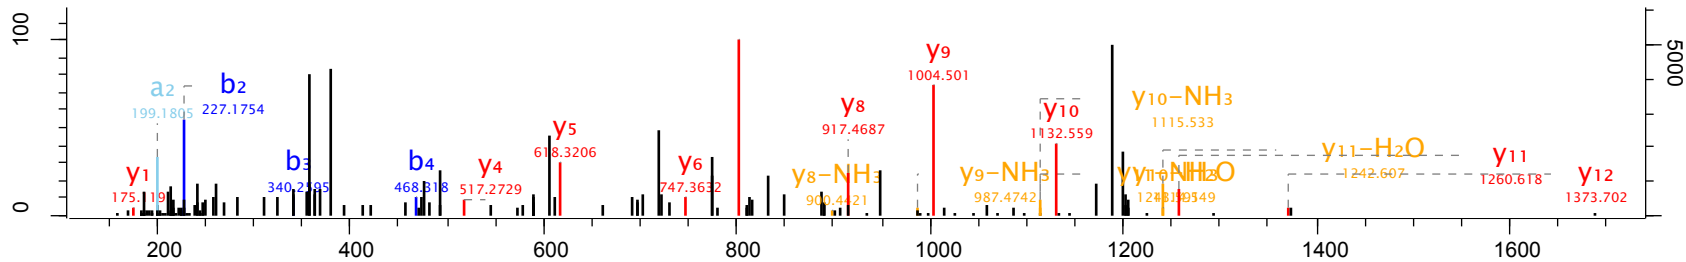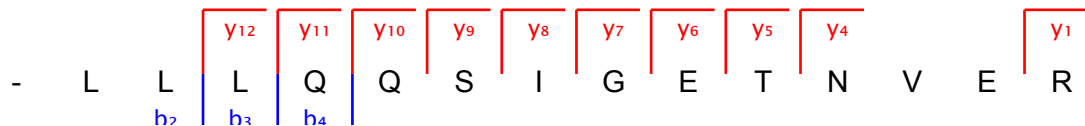

Raw file

20140925\_fract23\_dyn\_5ul\_H7\_01\_458

Scan

20707

Method

TOF; CID

Score

101.62

m/z

874.44

Gene names

BRI3

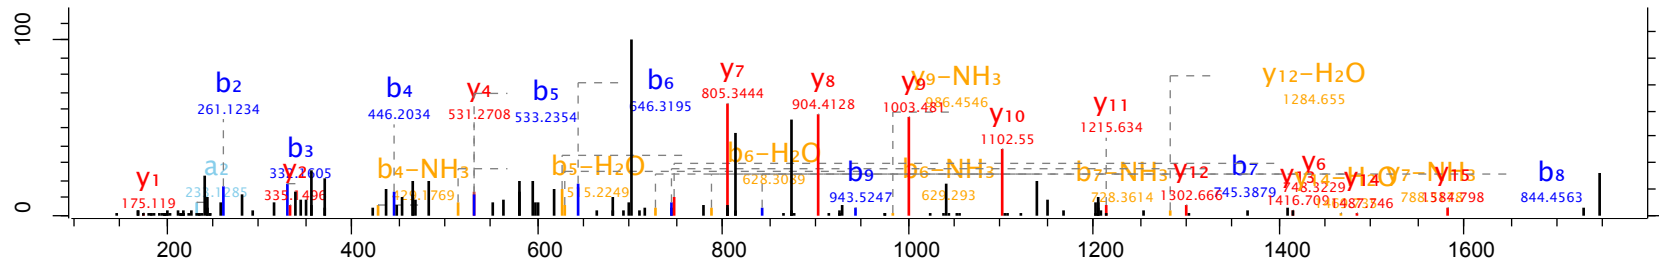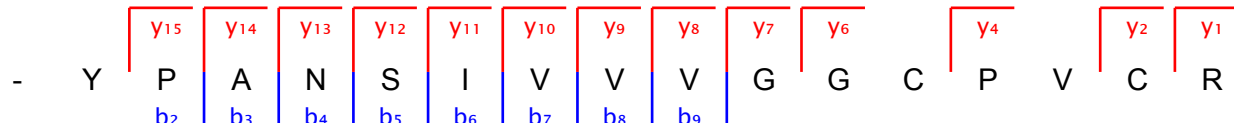

Raw file

Scan

Method

Score

m/z

Gene names

20140925\_fract23\_dyn\_5ul\_H7\_01\_458

21573

TOF; CID

79.15

492.26

ITGB6

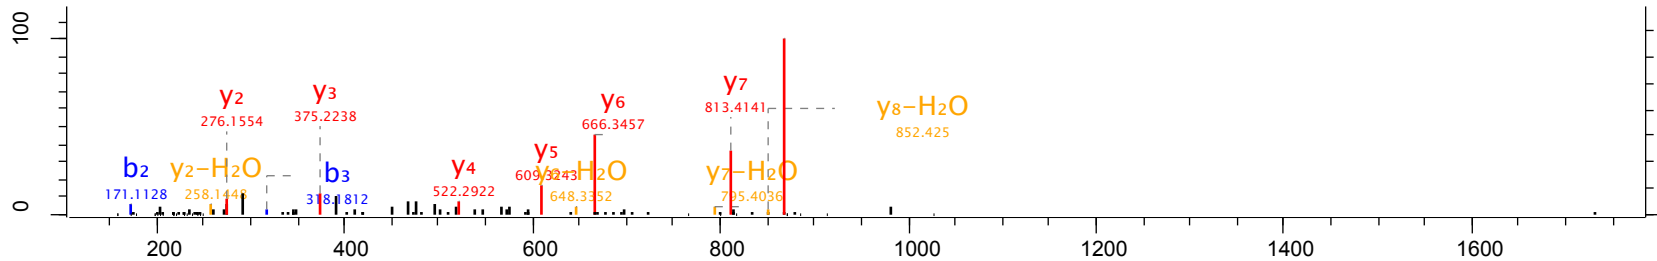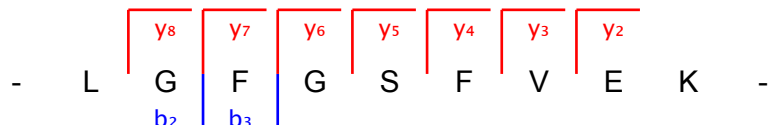



Raw file

Scan

Method

Score

m/z

Gene names

20140925\_fract23\_dyn\_5ul\_H7\_01\_458

28773

TOF; CID

43.7

1072.54

METTL12

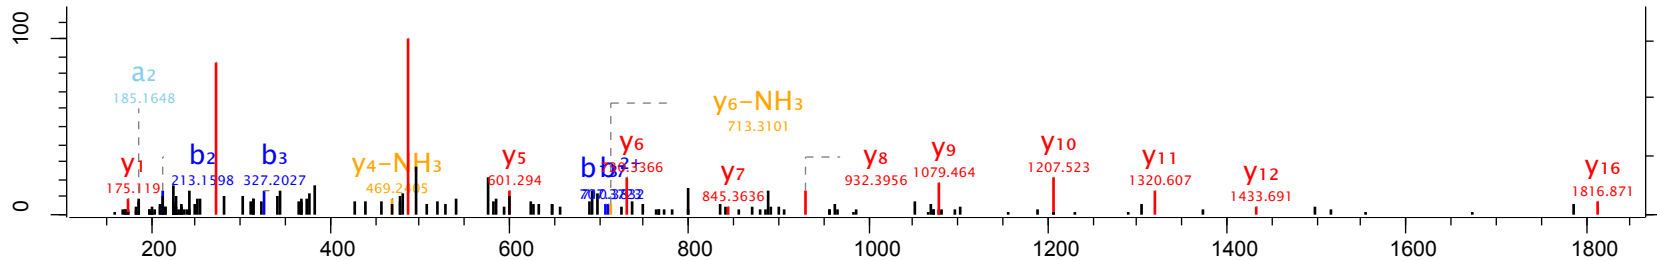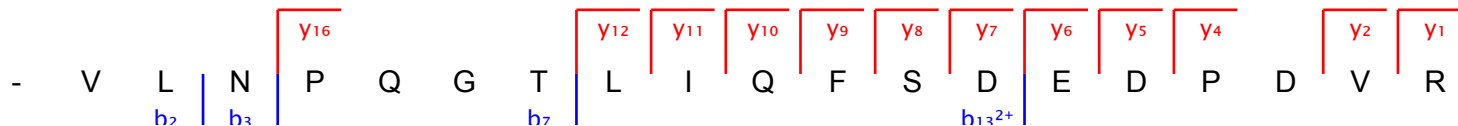



Raw file

20140925\_fract23\_dyn\_5ul\_H7\_01\_458

Scan

33082

Method

TOF; CID

Score

107.75

m/z

961.13

Gene names

SFT2D1

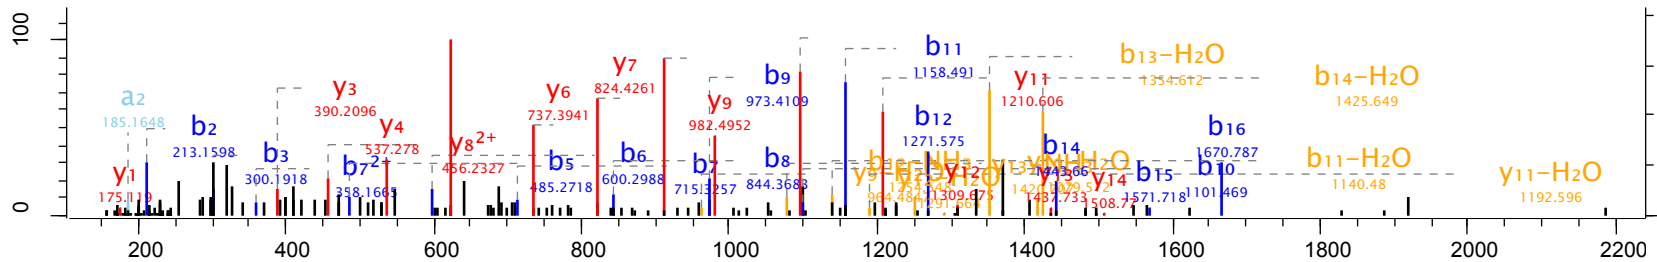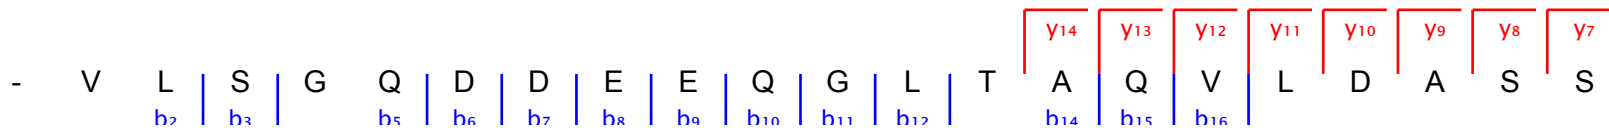

| Raw file                           | Scan  | Method   | Score | m/z    | Gene names |
|------------------------------------|-------|----------|-------|--------|------------|
| 20140925_fract23_dyn_5ul_H7_01_458 | 34170 | TOF; CID | 57.23 | 698.88 | PRKD2      |

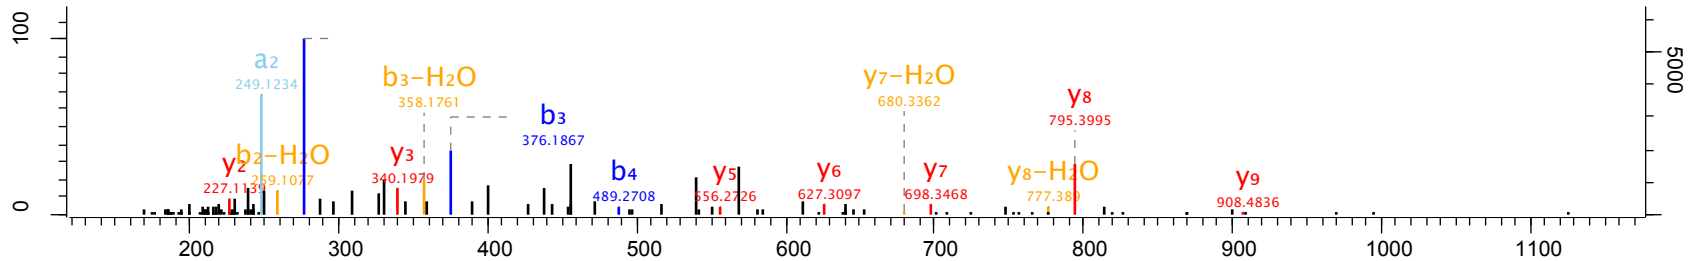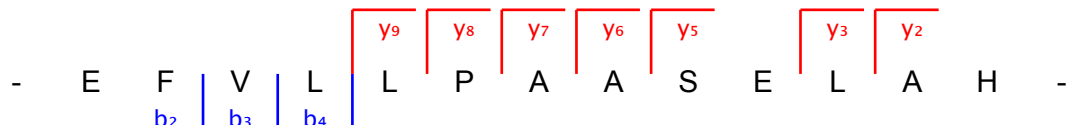

| Raw file                           | Scan | Method   | Score | m/z    | Gene names |
|------------------------------------|------|----------|-------|--------|------------|
| 20140925_fract24_dyn_5ul_H8_01_459 | 9206 | TOF; CID | 74.79 | 570.63 | RCBTB2     |

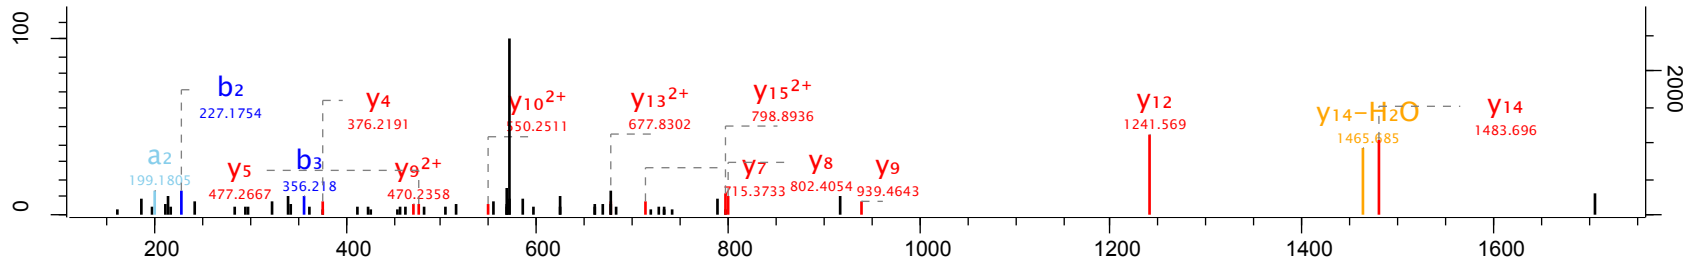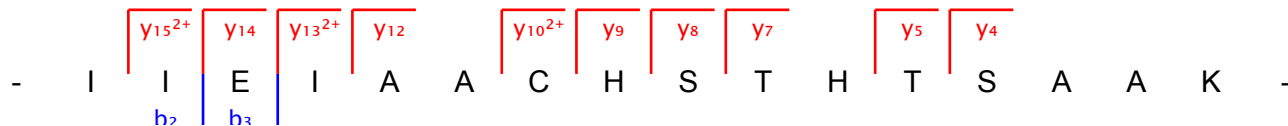

Raw file

Scan

Method

Score

m/z

Gene names

20140925\_fract24\_dyn\_5ul\_H8\_01\_459

9393

TOF; CID

77.66

523.78

SLC25A23

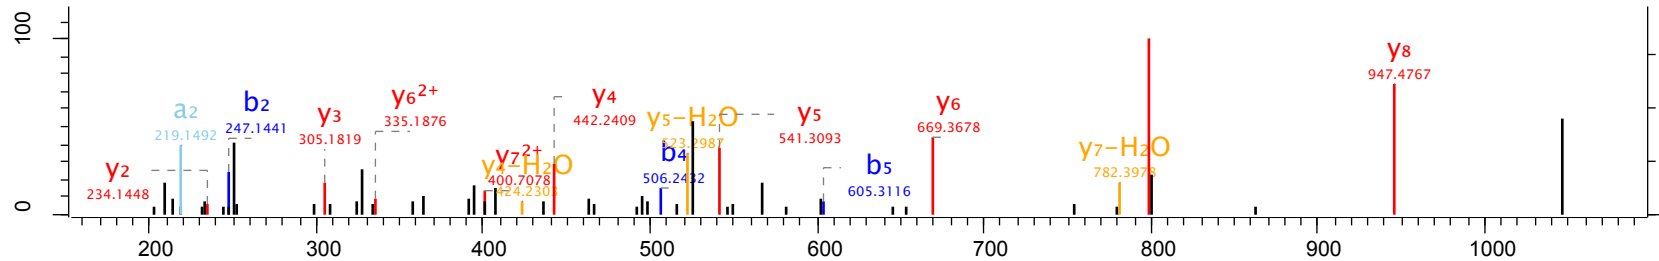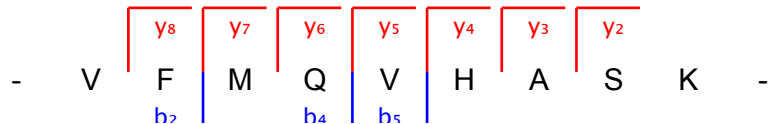

| Raw file                           | Scan  | Method   | Score | m/z    | Gene names |
|------------------------------------|-------|----------|-------|--------|------------|
| 20140925_fract24_dyn_5ul_H8_01_459 | 12749 | TOF; CID | 76.06 | 528.81 | TTC7B      |

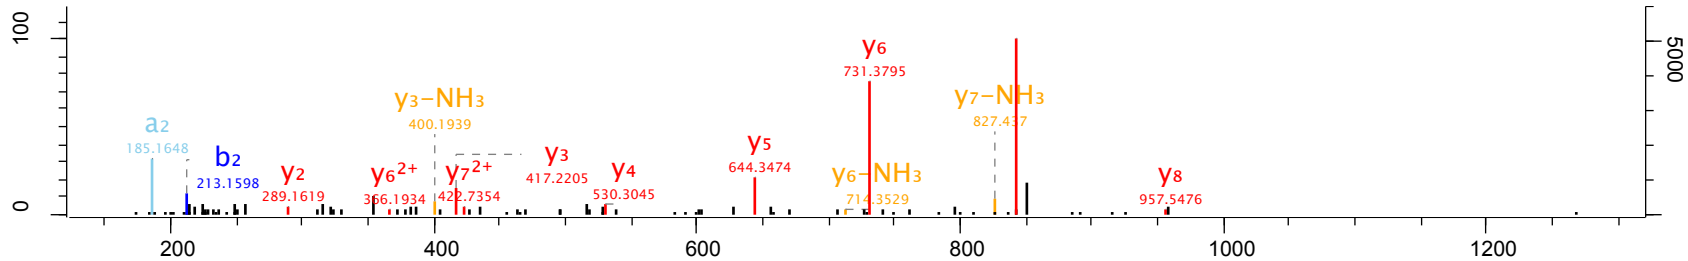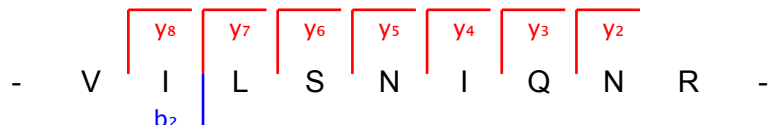

Raw file

20140925\_fract24\_dyn\_5ul\_H8\_01\_459

Scan

15262

Method

TOF; CID

Score

61.34

m/z

399.22

Gene names

WDR90

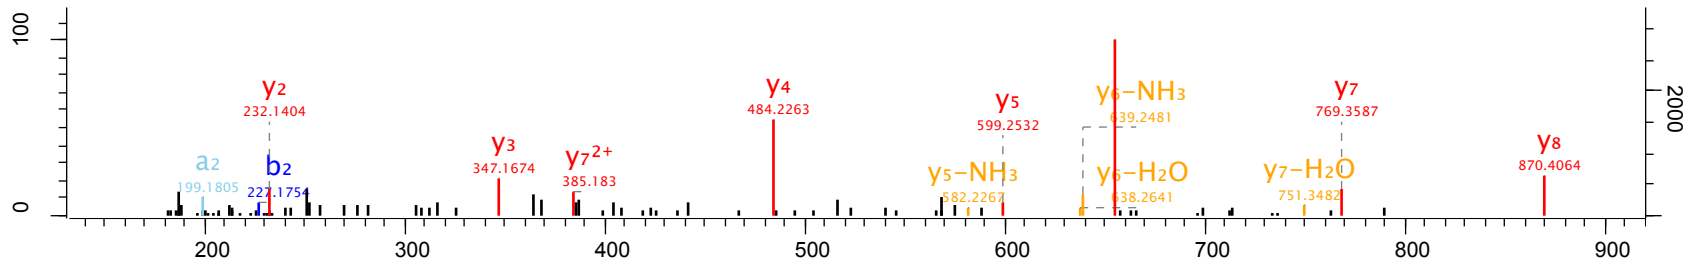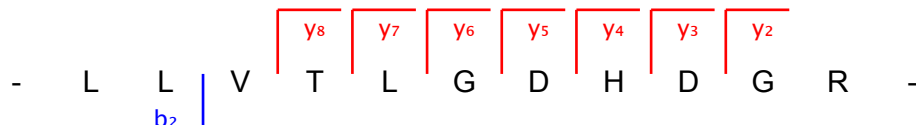

| Raw file                           | Scan  | Method   | Score | m/z    | Gene names |
|------------------------------------|-------|----------|-------|--------|------------|
| 20140925_fract24_dyn_5ul_H8_01_459 | 16548 | TOF; CID | 97.8  | 428.76 | STRC       |

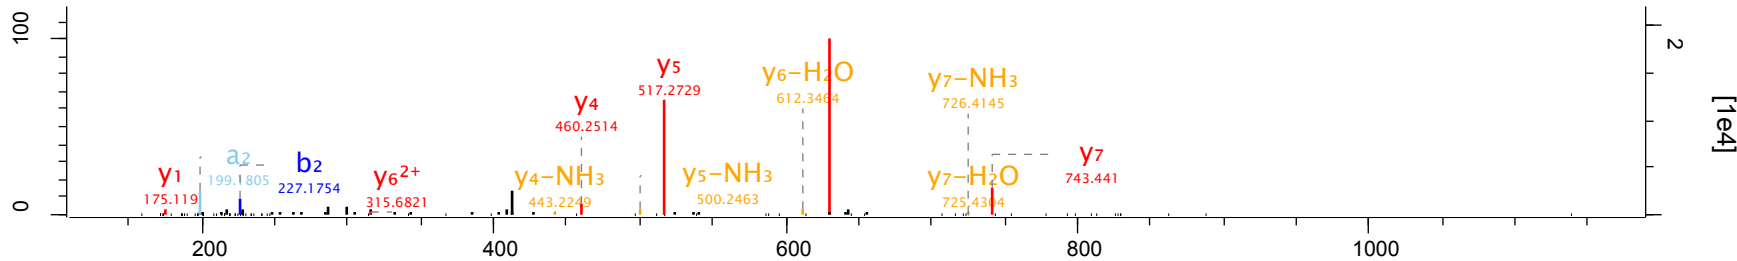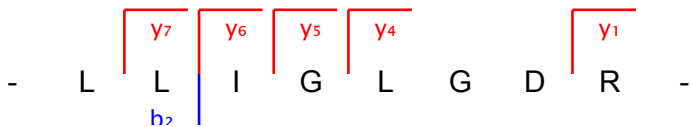

Raw file

Scan

Method

Score

m/z

Gene names

20140925\_fract24\_dyn\_5ul\_H8\_01\_459

19885

TOF; CID

53.45

552.98

FAM189B

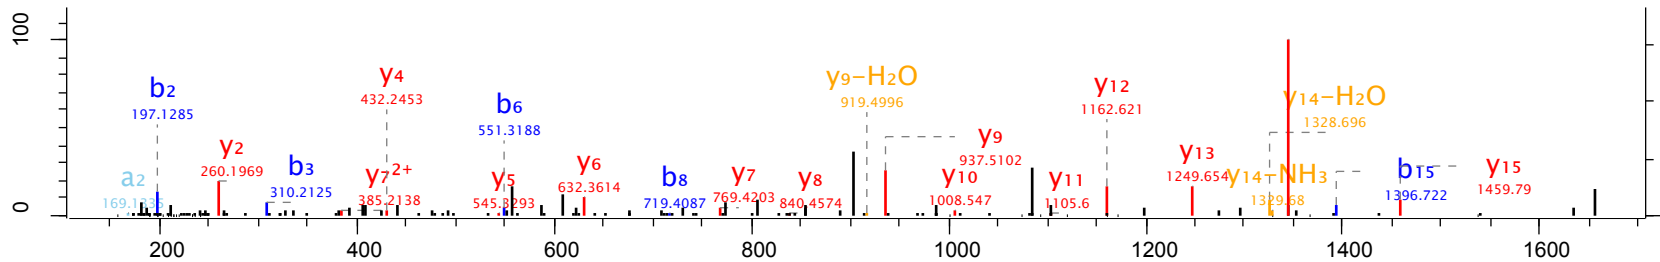

[1e4]

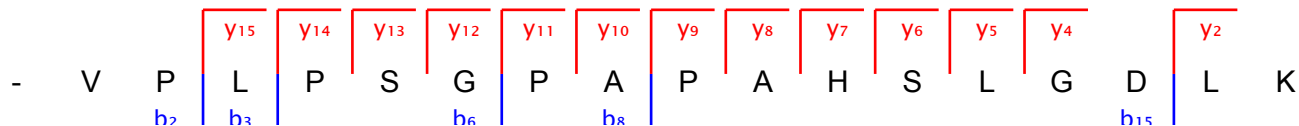



| Raw file                           | Scan  | Method   | Score | m/z    | Gene names |
|------------------------------------|-------|----------|-------|--------|------------|
| 20140925_fract24_dyn_5ul_H8_01_459 | 27364 | TOF; CID | 68.48 | 891.44 | TAF11      |

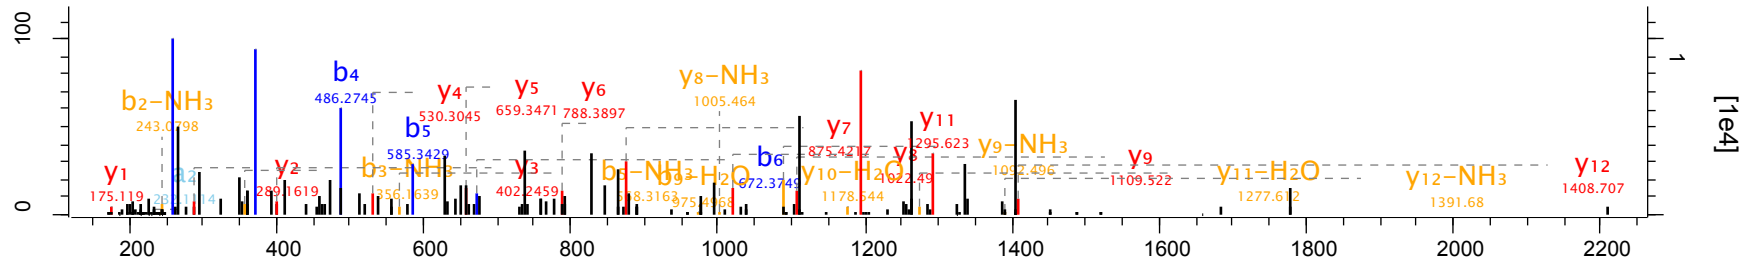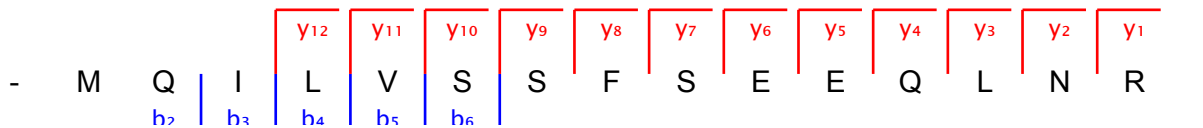

Raw file

Scan

Method

Score

m/z

Gene names

20140925\_fract24\_dyn\_5ul\_H8\_01\_459

28153

TOF; CID

62.34

693.38

IFT88

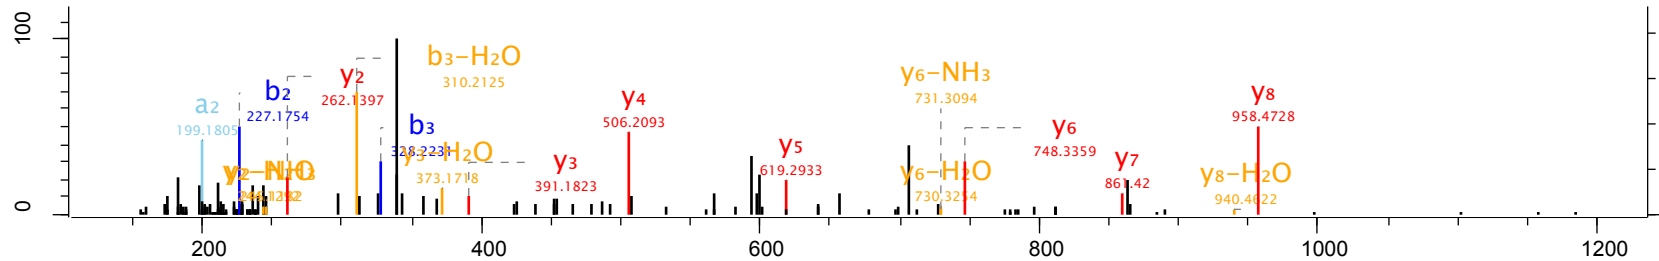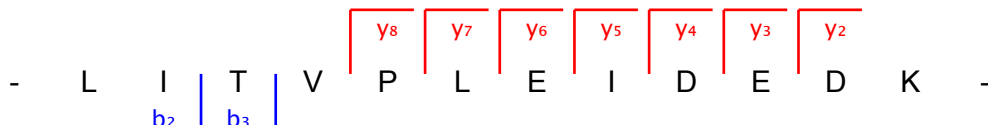

| Raw file                           | Scan  | Method   | Score | m/z    | Gene names |
|------------------------------------|-------|----------|-------|--------|------------|
| 20140925_fract24_dyn_5ul_H8_01_459 | 28568 | TOF; CID | 88.71 | 512.29 | FAM118A    |

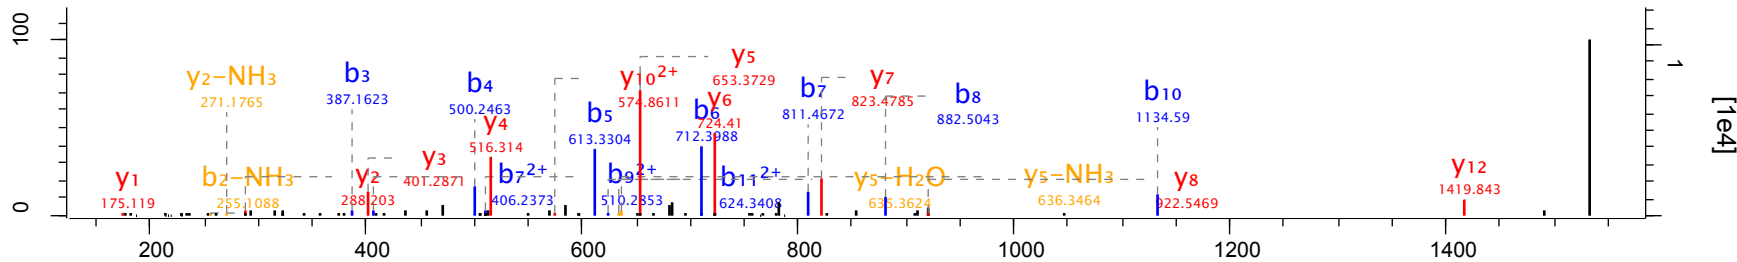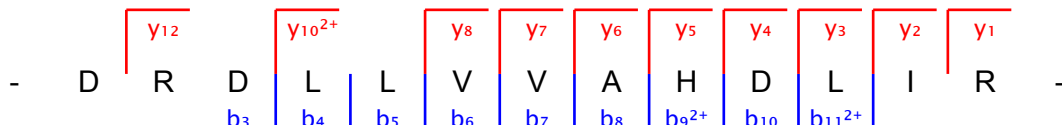

Raw file

Scan

Method

Score

m/z

Gene names

20140925\_fract24\_dyn\_5ul\_H8\_01\_459

34509

TOF; CID

55.75

823.44

NCKAP5

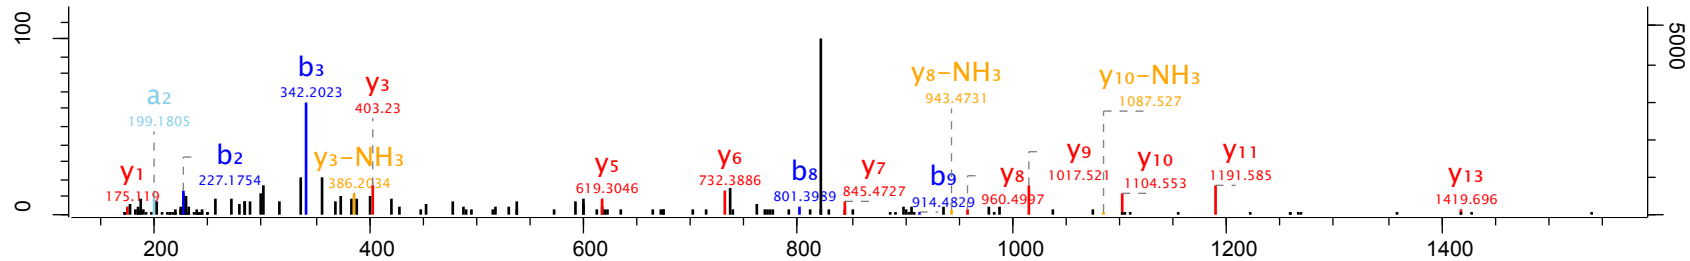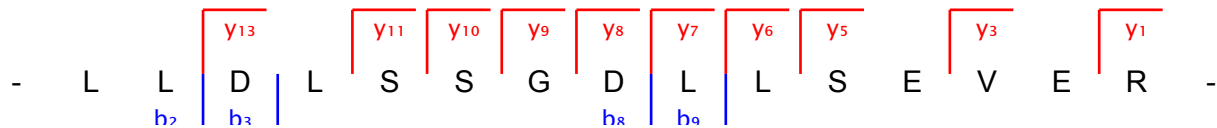

Supplement: supp_M114.047407_mcp.M114.047407-11.pdf [file supp_M114.047407_mcp.M114.047407-11.pdf]
