# Supplementary material for: The Impact II, a Very High-Resolution Quadrupole Time-of-Flight Instrument (QTOF) for Deep Shotgun Proteomics
Source: PubMed Central journal article supplement (PMC4587313; doi:10.1074/mcp.m114.047407), 2015-05-19

Raw file

20141014\_fract1\_dyn\_5ul\_E1\_01\_580

Scan

6102

Method

TOF; CID

Score

107.69

m/z

330.19

Gene names

HMGN4

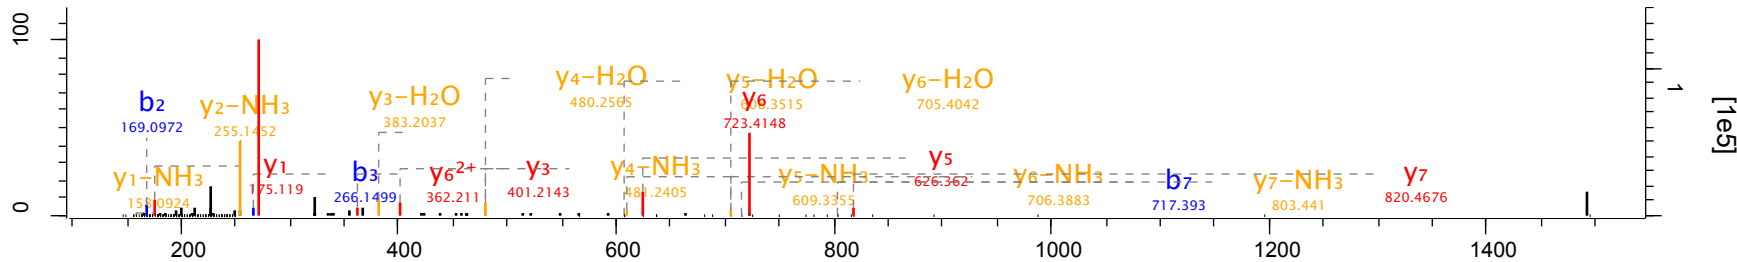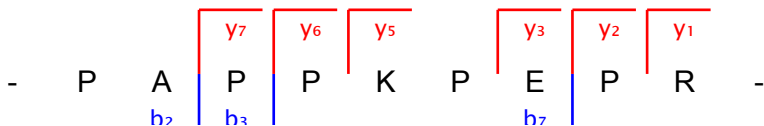

| Raw file                          | Scan | Method   | Score | m/z   | Gene names |
|-----------------------------------|------|----------|-------|-------|------------|
| 20141014_fract1_dyn_5ul_E1_01_580 | 6441 | TOF; CID | 90.05 | 377.2 | NDUFB2     |

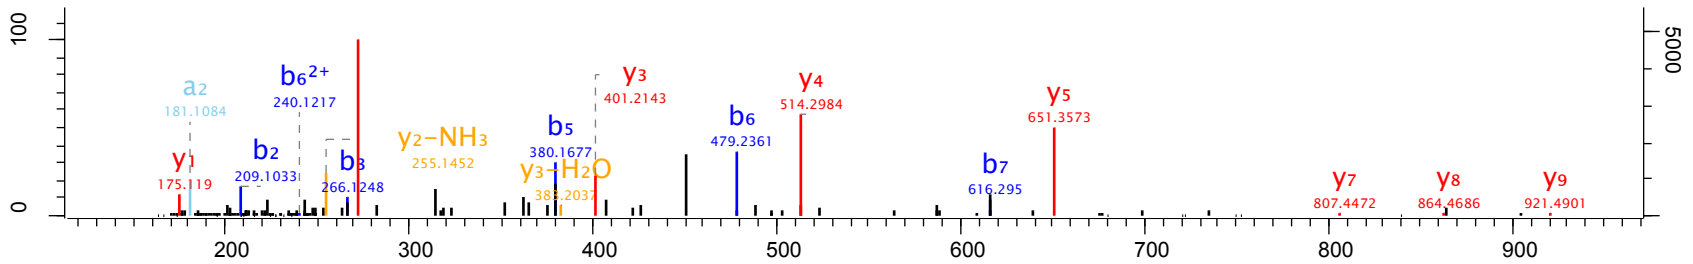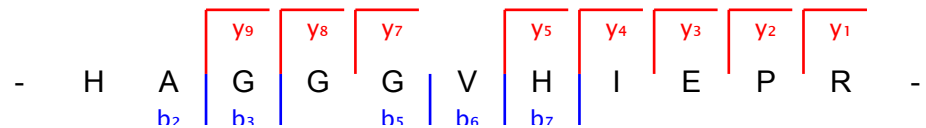

Raw file

20141014\_fract1\_dyn\_5ul\_E1\_01\_580

Scan

8834

Method

TOF; CID

Score

70.09

m/z

447.55

Gene names

BTBD7

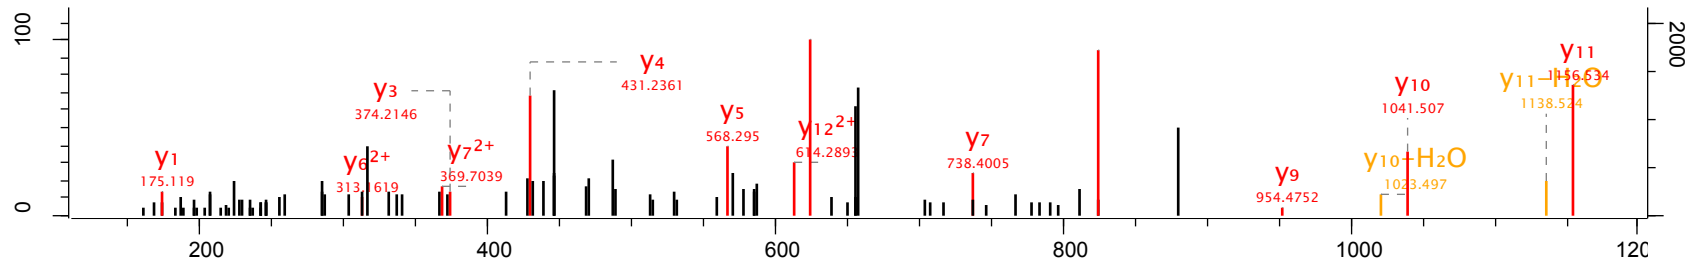

- L A D S E S L G H G A Q R -

Fragmentation sites (y-ions) are indicated by red brackets above the amino acid sequence:

- y12<sup>2+</sup> (between L and A)
- y11 (between A and D)
- y10 (between D and S)
- y9 (between S and E)
- y8 (between E and S)
- y7 (between S and L)
- y6 (between L and G)
- y5 (between G and H)
- y4 (between H and G)
- y3 (between G and A)
- y1 (between A and Q)

Raw file

20141014\_fract1\_dyn\_5ul\_E1\_01\_580

Scan

9299

Method

TOF; CID

Score

66.55

m/z

560.28

Gene names

SPSB3

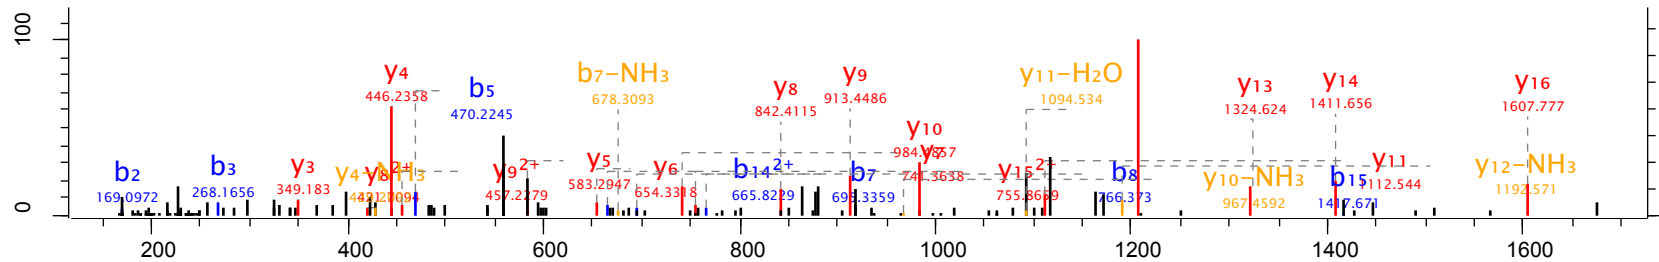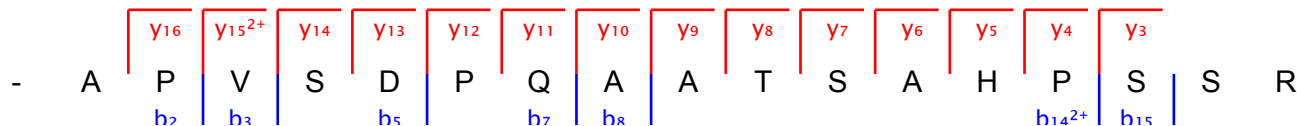

Raw file

20141014\_fract1\_dyn\_5ul\_E1\_01\_580

Scan

13546

Method

TOF; CID

Score

96.74

m/z

702.33

Gene names

TNFRSF10D

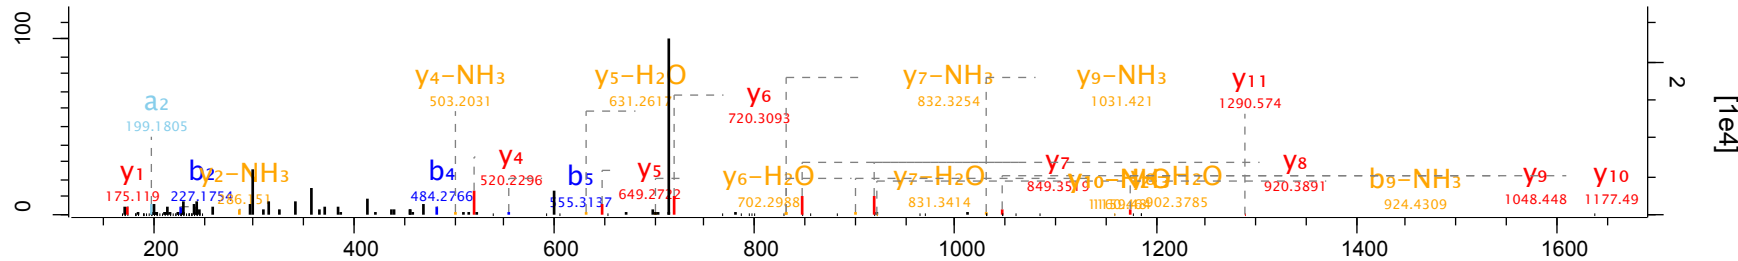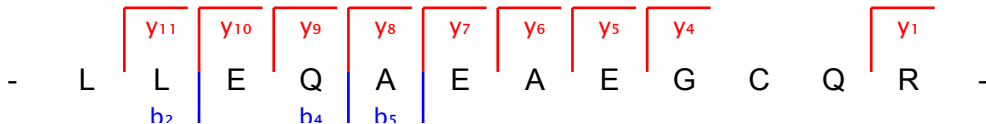

| Raw file                          | Scan  | Method   | Score | m/z    | Gene names |
|-----------------------------------|-------|----------|-------|--------|------------|
| 20141014_fract1_dyn_5ul_E1_01_580 | 14845 | TOF; CID | 65.18 | 538.28 | PTMS       |

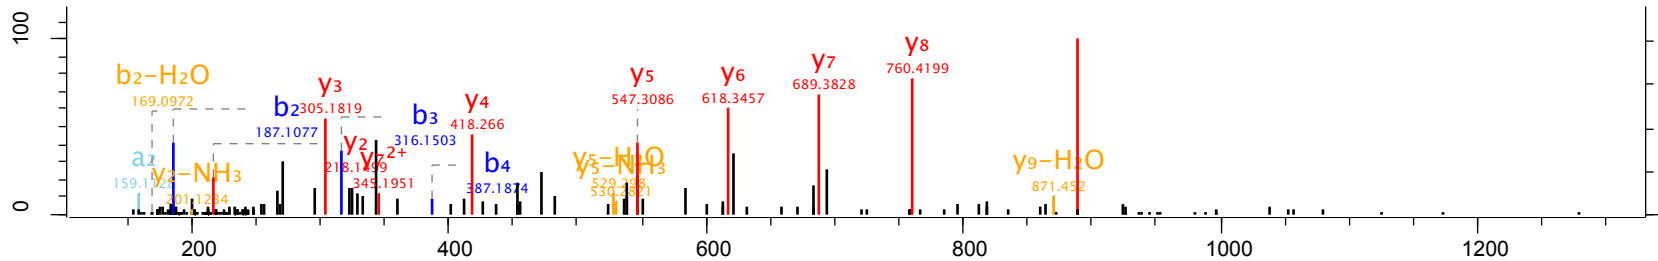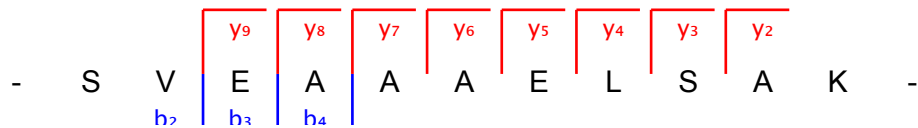

Raw file

20141014\_fract1\_dyn\_5ul\_E1\_01\_580

Scan

21407

Method

TOF; CID

Score

67.08

m/z

566.8

Gene names

RABL2B;RABL2A

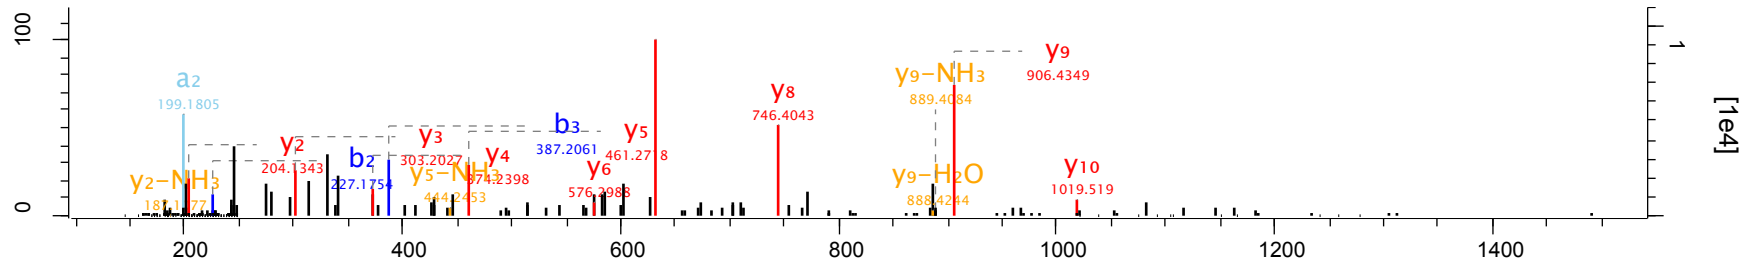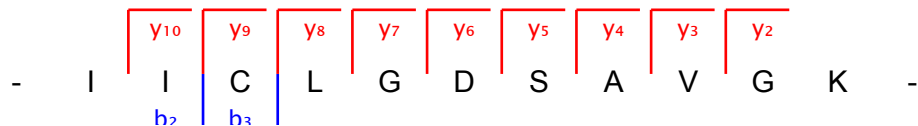

Raw file

20141014\_fract1\_dyn\_5ul\_E1\_01\_580

Scan

22474

Method

TOF; CID

Score

69.43

m/z

593.99

Gene names

SLC35A3

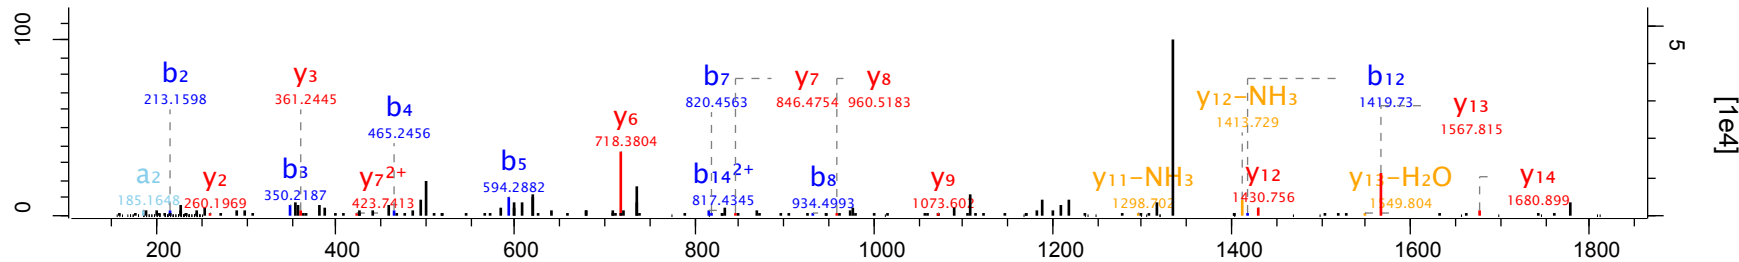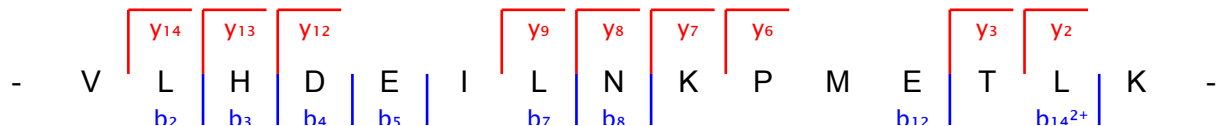



Raw file

20141014\_fract1\_dyn\_5ul\_E1\_01\_580

Scan

25904

Method

TOF; CID

Score

68.54

m/z

597.31

Gene names

FBXL17

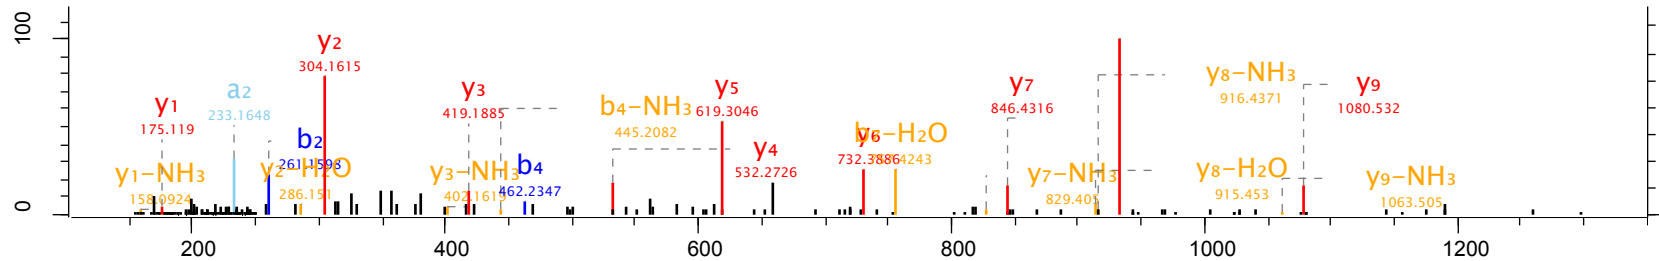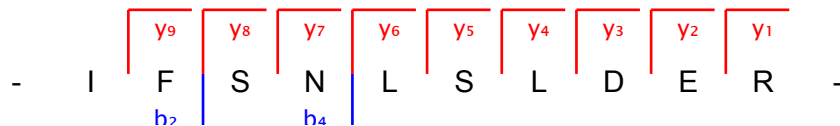

| Raw file                          | Scan  | Method   | Score | m/z    | Gene names |
|-----------------------------------|-------|----------|-------|--------|------------|
| 20141014_fract1_dyn_5ul_E1_01_580 | 27070 | TOF; CID | 80.24 | 699.87 | DEPTOR     |

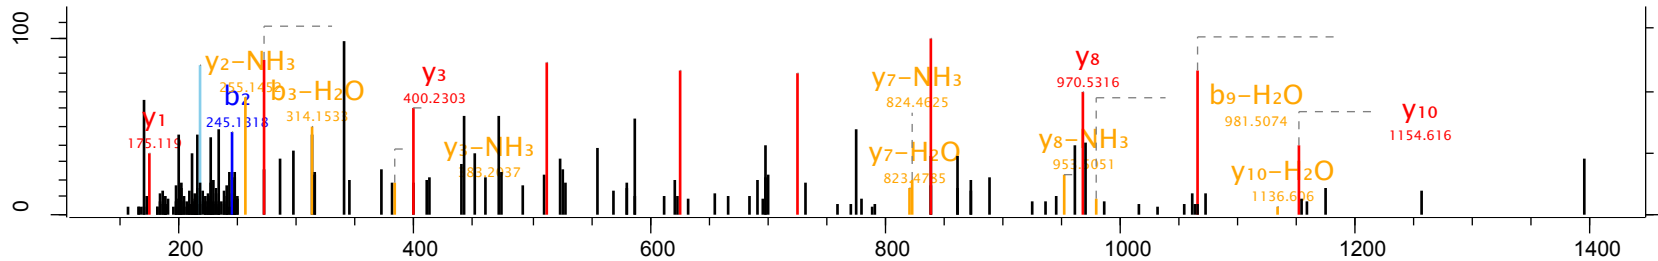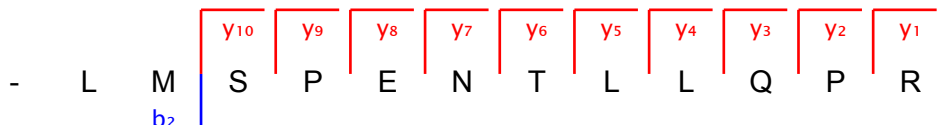

Raw file

20141014\_fract1\_dyn\_5ul\_E1\_01\_580

Scan

27783

Method

TOF; CID

Score

48.9

m/z

984.49

Gene names

HOXA11

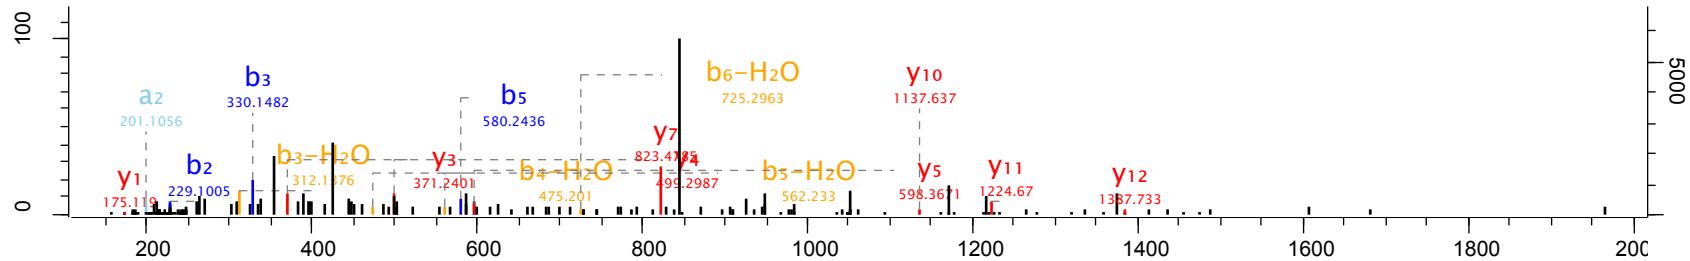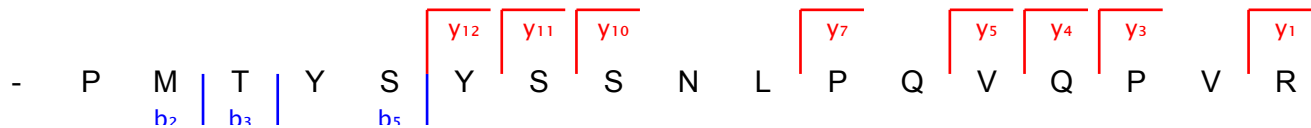

Raw file

20141014\_fract1\_dyn\_5ul\_E1\_01\_580

Scan

33597

Method

TOF; CID

Score

51.73

m/z

723.38

Gene names

SIVA1;GRM6

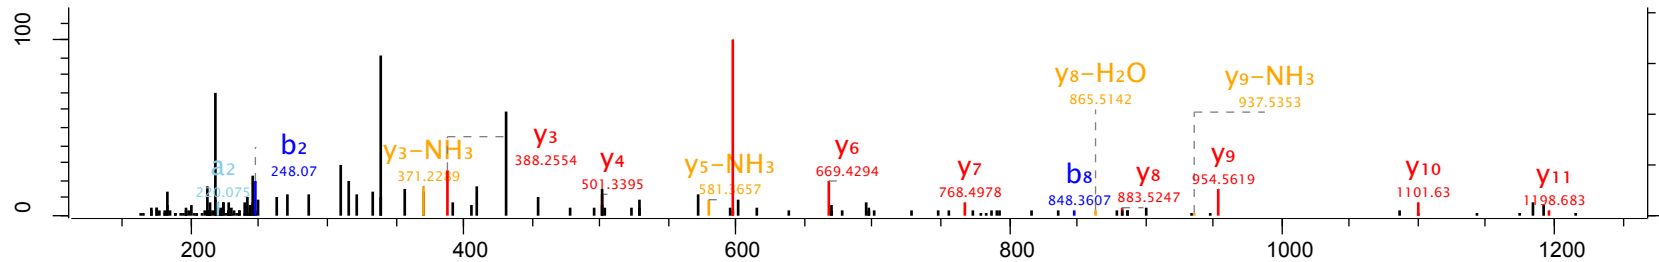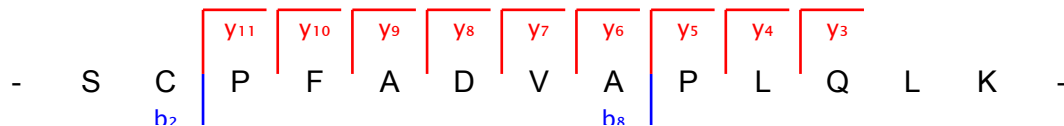

Raw file

20141014\_fract1\_dyn\_5ul\_E1\_01\_580

Scan

34618

Method

TOF; CID

Score

78.6

m/z

906.98

Gene names

RIMKLB

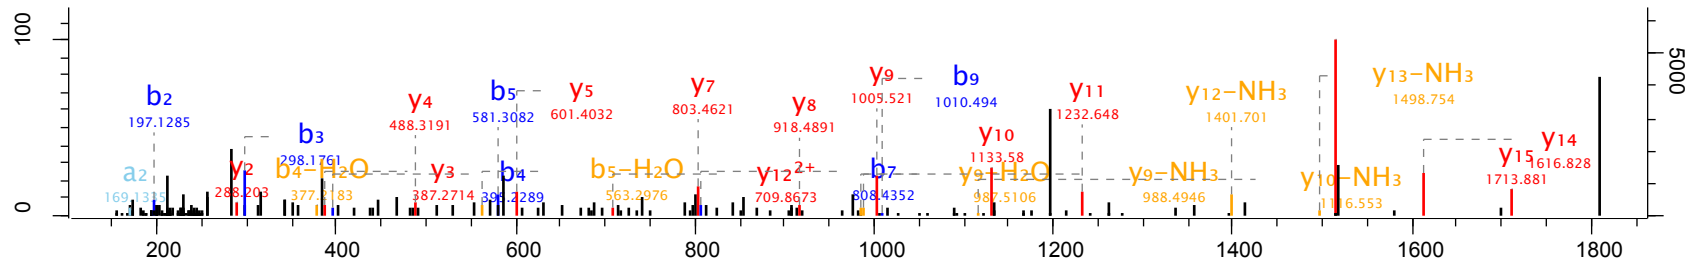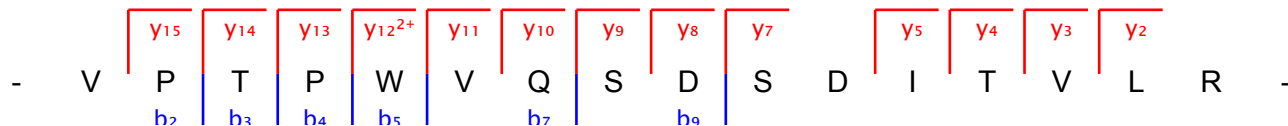

Raw file

20141014\_fract1\_dyn\_5ul\_E1\_01\_580

Scan

35665

Method

TOF; CID

Score

80.69

m/z

520.31

Gene names

SAMD11

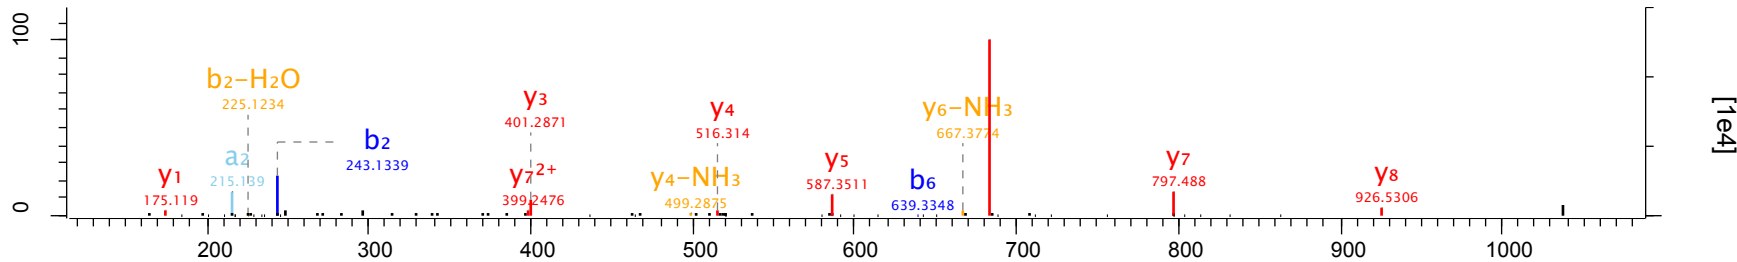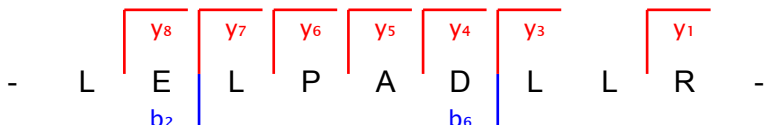

Raw file

20141014\_fract2\_dyn\_5ul\_E2\_01\_581

Scan

3355

Method

TOF; CID

Score

81.1

m/z

390.53

Gene names

BBIP1

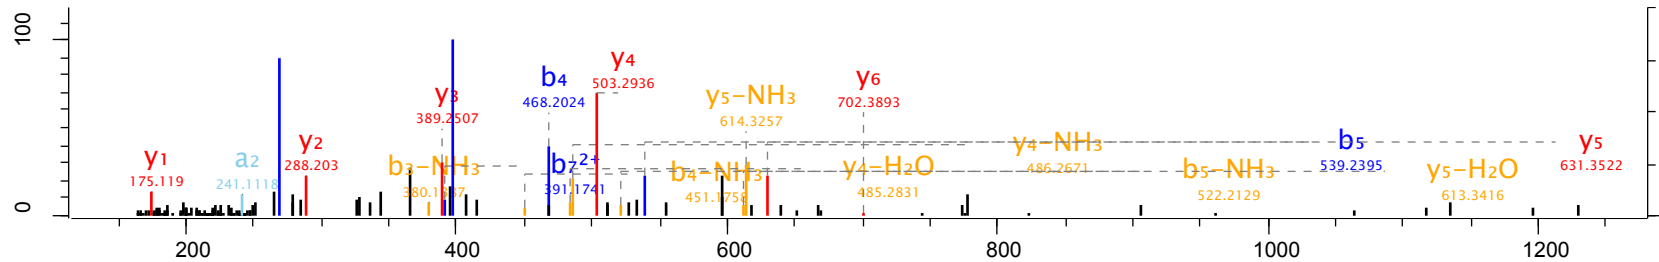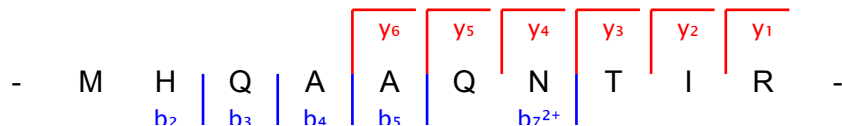

Raw file

20141014\_fract2\_dyn\_5ul\_E2\_01\_581

Scan

5353

Method

TOF; CID

Score

104.44

m/z

534.72

Gene names

SIAH1

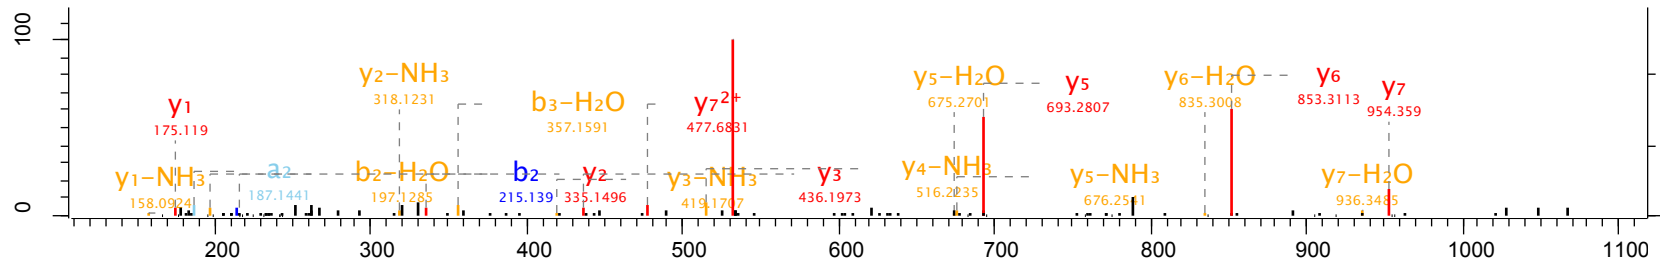

[1e4]

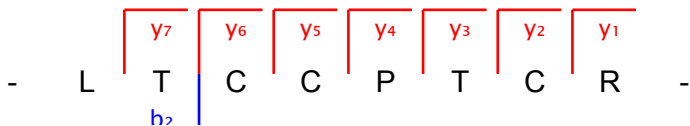



Raw file

20141014\_fract2\_dyn\_5ul\_E2\_01\_581

Scan

5967

Method

TOF; CID

Score

86.5

m/z

615.32

Gene names

CD164

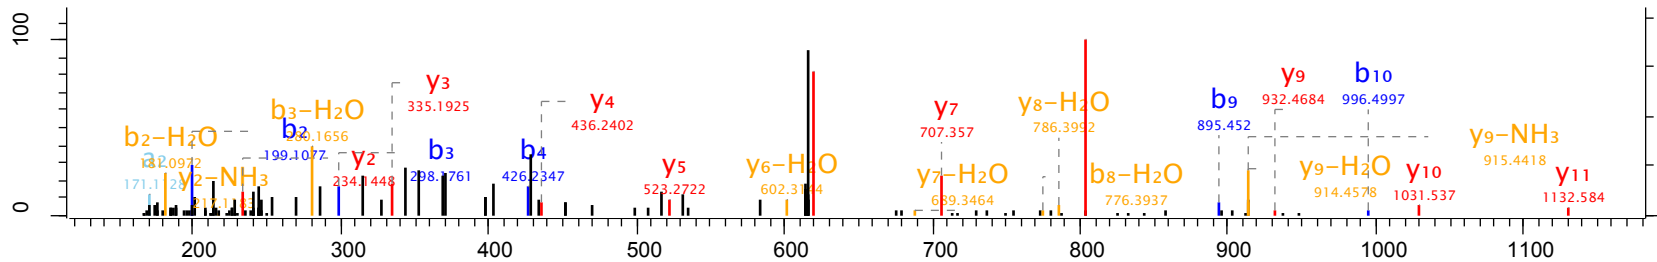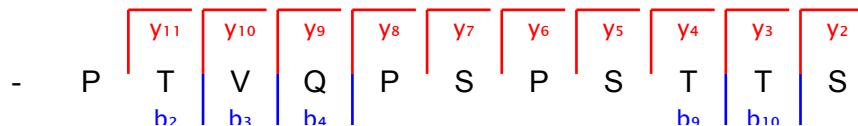

| Raw file                          | Scan | Method   | Score  | m/z    | Gene names |
|-----------------------------------|------|----------|--------|--------|------------|
| 20141014_fract2_dyn_5ul_E2_01_581 | 7794 | TOF; CID | 127.46 | 509.26 | VPS9D1     |

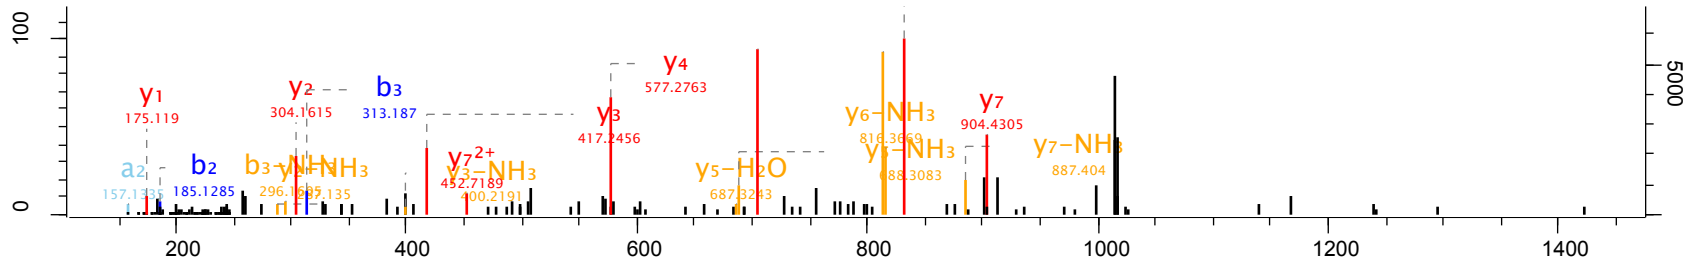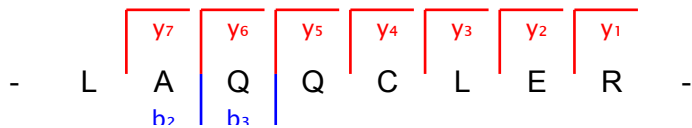

| Raw file                          | Scan | Method   | Score | m/z    | Gene names |
|-----------------------------------|------|----------|-------|--------|------------|
| 20141014_fract2_dyn_5ul_E2_01_581 | 8678 | TOF; CID | 52.25 | 482.24 | ZNF165     |

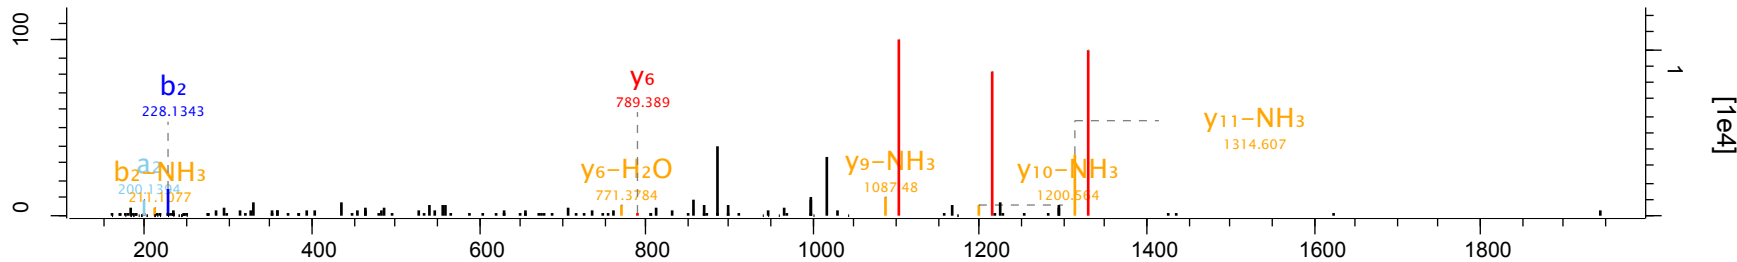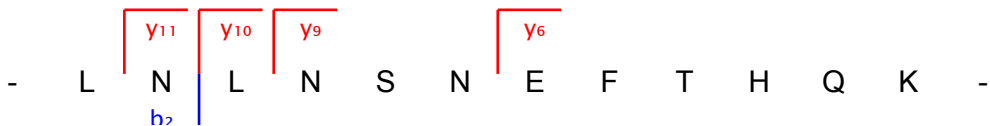

Raw file

20141014\_fract2\_dyn\_5ul\_E2\_01\_581

Scan

10721

Method

TOF; CID

Score

54.9

m/z

660.32

Gene names

NDFIP2

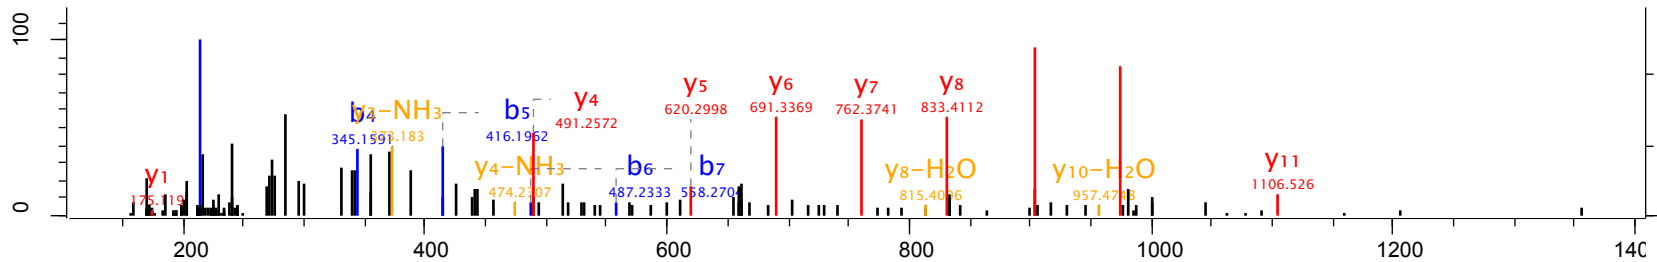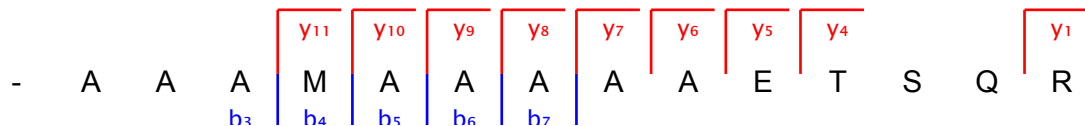

| Raw file                          | Scan  | Method   | Score | m/z    | Gene names |
|-----------------------------------|-------|----------|-------|--------|------------|
| 20141014_fract2_dyn_5ul_E2_01_581 | 11931 | TOF; CID | 87.18 | 502.25 | C18orf32   |

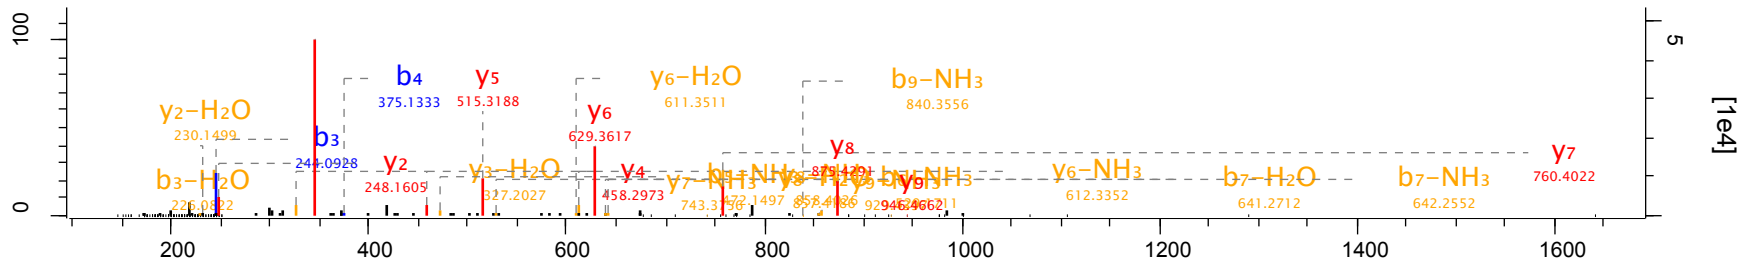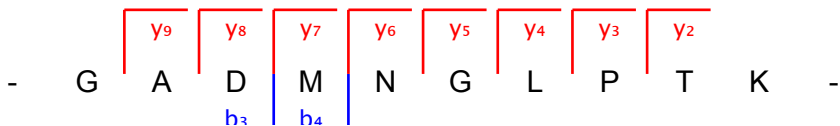

| Raw file                          | Scan  | Method   | Score | m/z    | Gene names |
|-----------------------------------|-------|----------|-------|--------|------------|
| 20141014_fract2_dyn_5ul_E2_01_581 | 12068 | TOF; CID | 95.52 | 552.78 | VAMP8      |

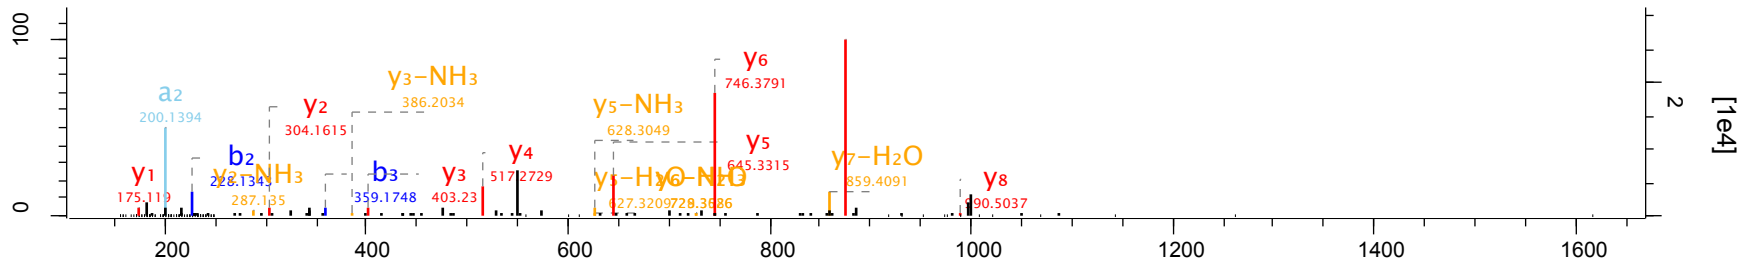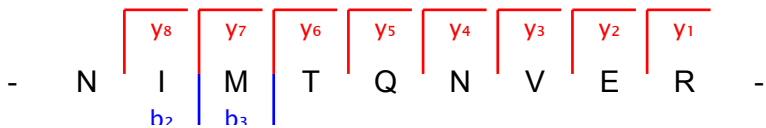

| Raw file                          | Scan  | Method   | Score  | m/z    | Gene names |
|-----------------------------------|-------|----------|--------|--------|------------|
| 20141014_fract2_dyn_5ul_E2_01_581 | 12220 | TOF; CID | 113.51 | 625.03 | C11orf48   |

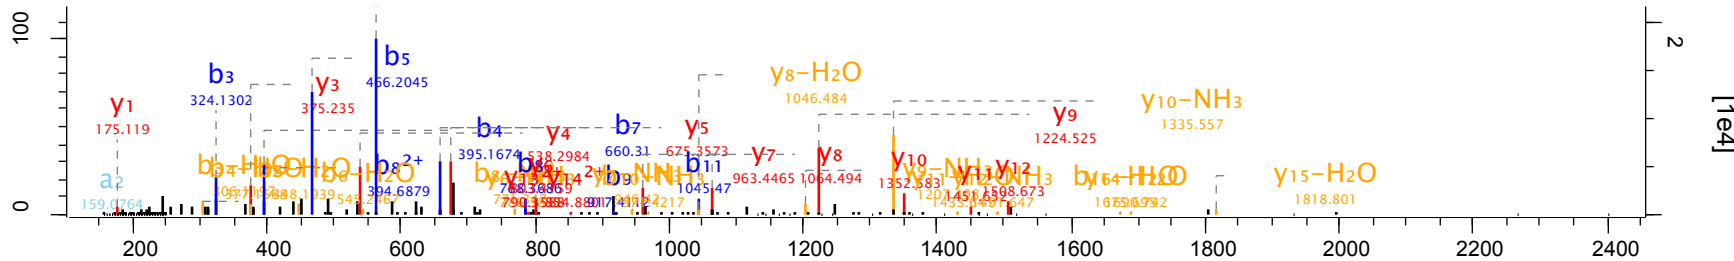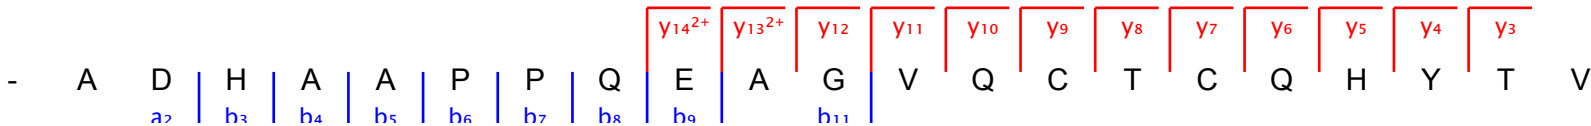

Raw file

20141014\_fract2\_dyn\_5ul\_E2\_01\_581

Scan

12521

Method

TOF; CID

Score

94.12

m/z

720.31

Gene names

LEPROTL1

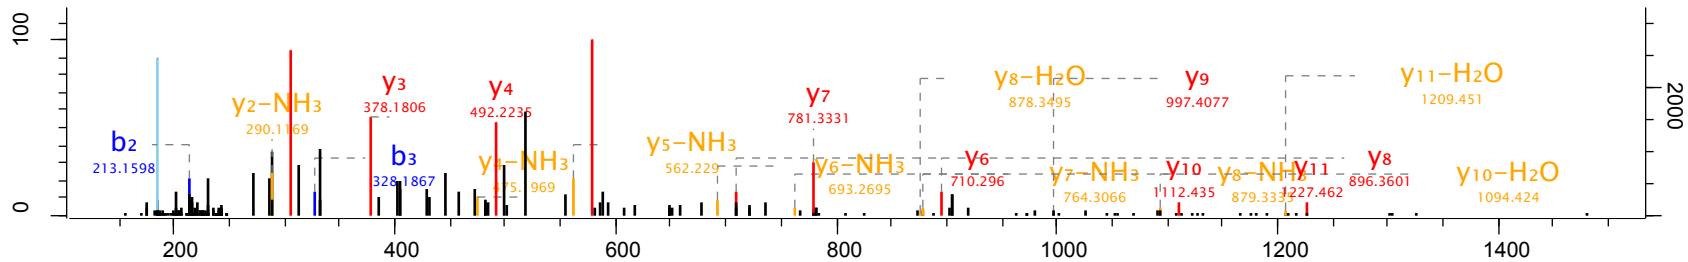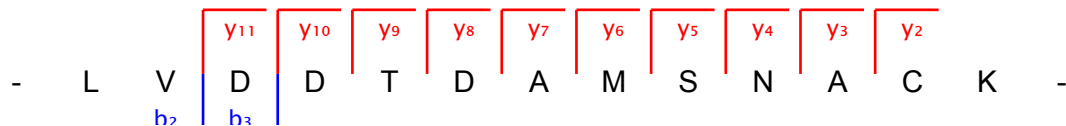



| Raw file                          | Scan  | Method   | Score  | m/z    | Gene names |
|-----------------------------------|-------|----------|--------|--------|------------|
| 20141014_fract2_dyn_5ul_E2_01_581 | 14642 | TOF; CID | 116.19 | 739.35 | ZNHIT1     |

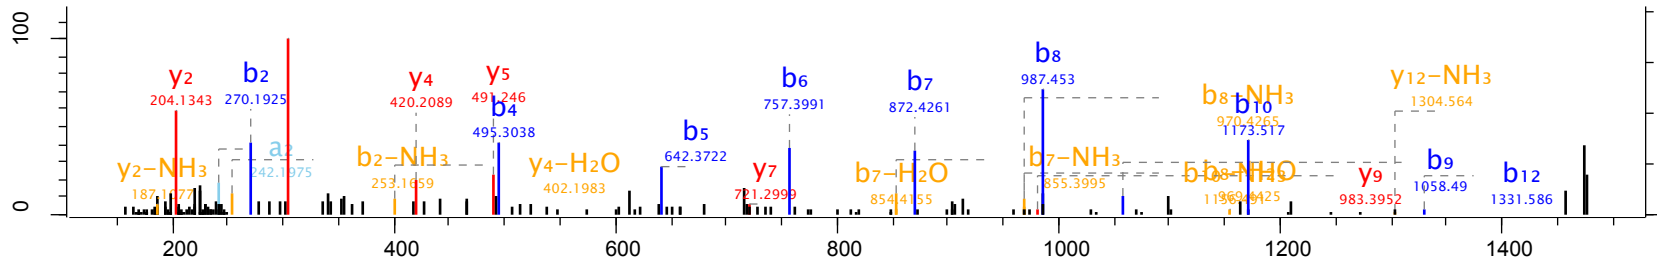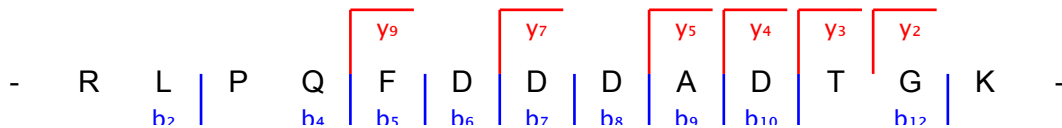

Raw file

20141014\_fract2\_dyn\_5ul\_E2\_01\_581

Scan

18284

Method

TOF; CID

Score

64.54

m/z

641.97

Gene names

ITPKA

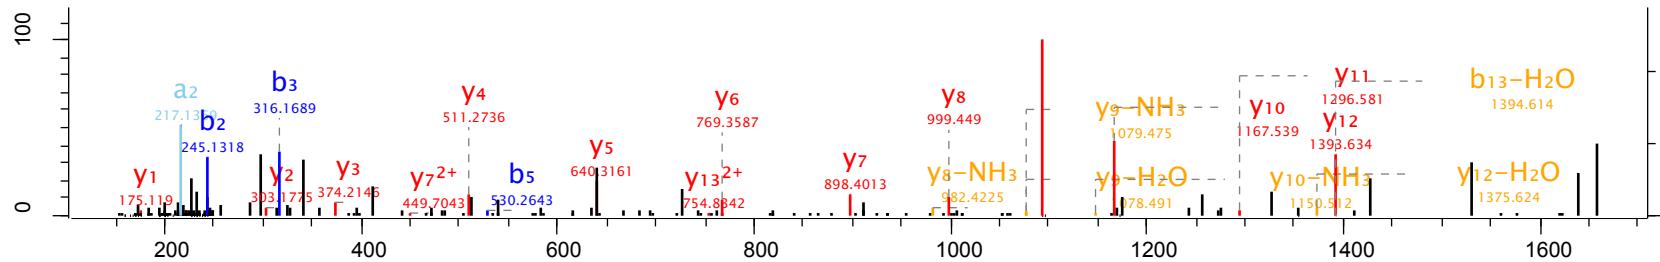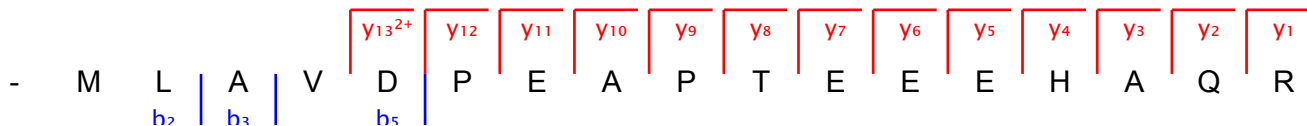

| Raw file                          | Scan  | Method   | Score  | m/z    | Gene names |
|-----------------------------------|-------|----------|--------|--------|------------|
| 20141014_fract2_dyn_5ul_E2_01_581 | 18570 | TOF; CID | 105.63 | 859.93 | APOC3      |

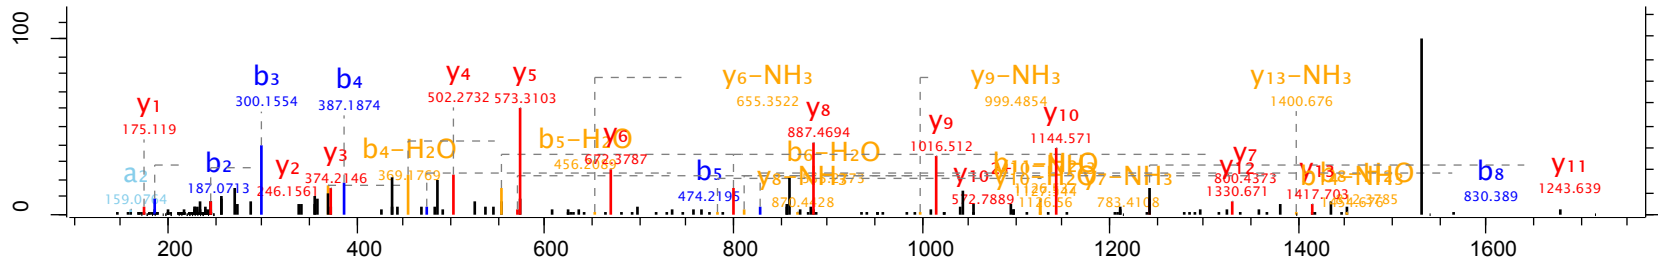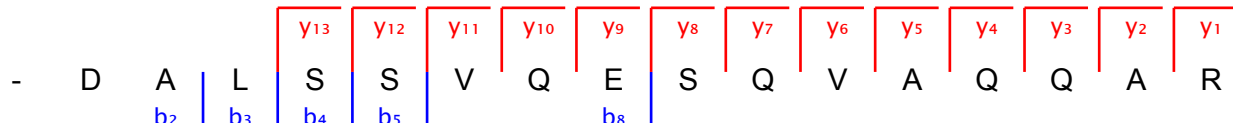

| Raw file                          | Scan  | Method   | Score | m/z    | Gene names |
|-----------------------------------|-------|----------|-------|--------|------------|
| 20141014_fract2_dyn_5ul_E2_01_581 | 26560 | TOF; CID | 73.93 | 756.86 | FAM73A     |

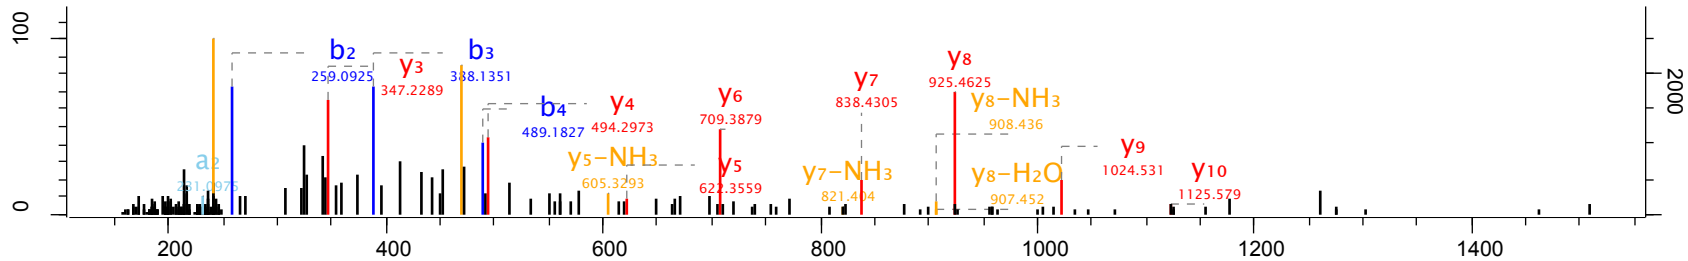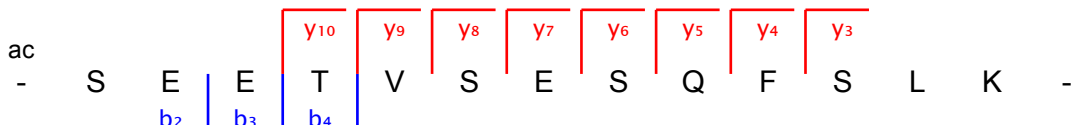

Raw file

20141014\_fract2\_dyn\_5ul\_E2\_01\_581

Scan

26737

Method

TOF; CID

Score

133.48

m/z

757.4

Gene names

MRPL57

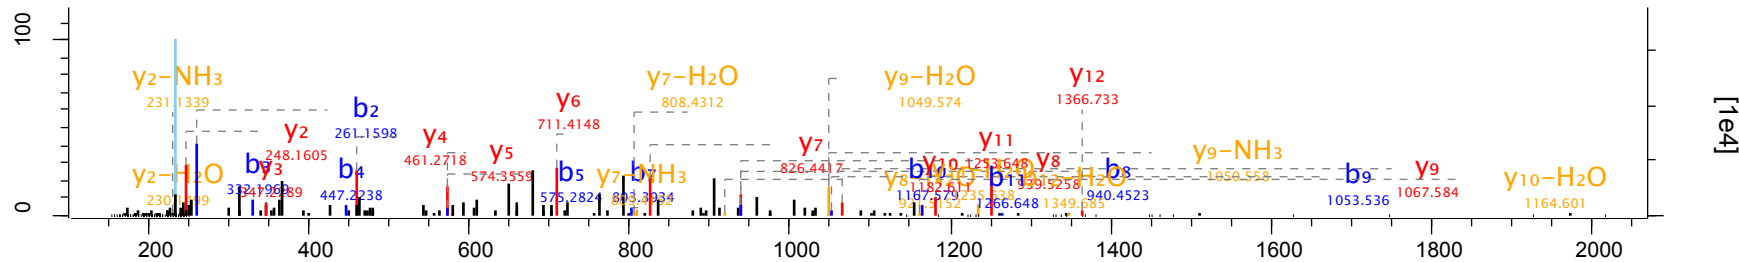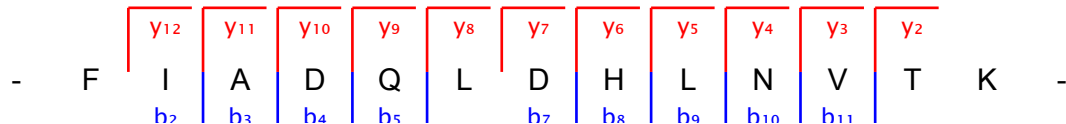

| Raw file                          | Scan  | Method   | Score | m/z    | Gene names |
|-----------------------------------|-------|----------|-------|--------|------------|
| 20141014_fract2_dyn_5ul_E2_01_581 | 27754 | TOF; CID | 49.3  | 615.36 | EFNB1      |

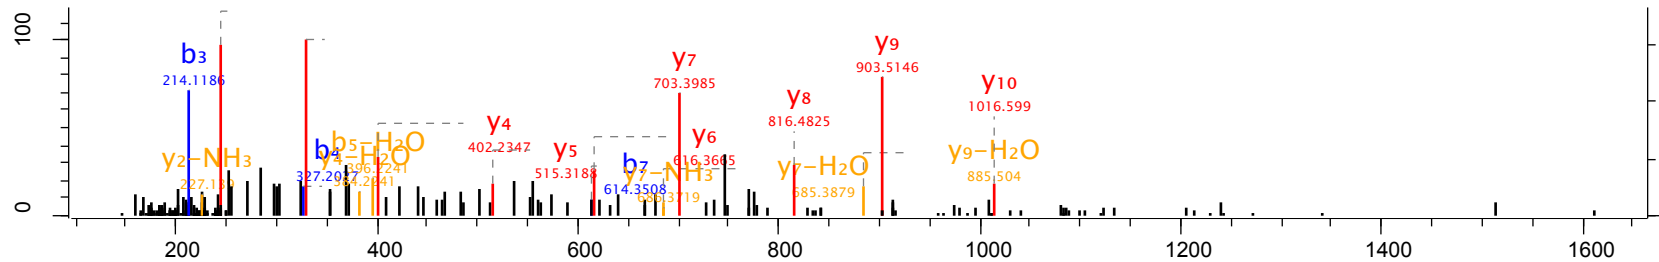

Sequence: - A A A L S L S T L A S P K -

Fragmentation sites (b and y ions) are indicated by brackets below the sequence:

- b<sub>3</sub> (blue) is between the 3rd and 4th residues (A and L).
- b<sub>4</sub> (blue) is between the 4th and 5th residues (L and S).
- b<sub>7</sub> (blue) is between the 7th and 8th residues (S and T).
- y<sub>2</sub> (red) is between the 1st and 2nd residues (A and A).
- y<sub>3</sub> (red) is between the 2nd and 3rd residues (A and A).
- y<sub>4</sub> (red) is between the 3rd and 4th residues (A and L).
- y<sub>5</sub> (red) is between the 4th and 5th residues (L and S).
- y<sub>6</sub> (red) is between the 5th and 6th residues (S and T).
- y<sub>7</sub> (red) is between the 6th and 7th residues (T and L).
- y<sub>8</sub> (red) is between the 7th and 8th residues (L and A).
- y<sub>9</sub> (red) is between the 8th and 9th residues (A and S).
- y<sub>10</sub> (red) is between the 9th and 10th residues (S and P).

Raw file

20141014\_fract2\_dyn\_5ul\_E2\_01\_581

Scan

28473

Method

TOF; CID

Score

94.49

m/z

565.29

Gene names

BTG2

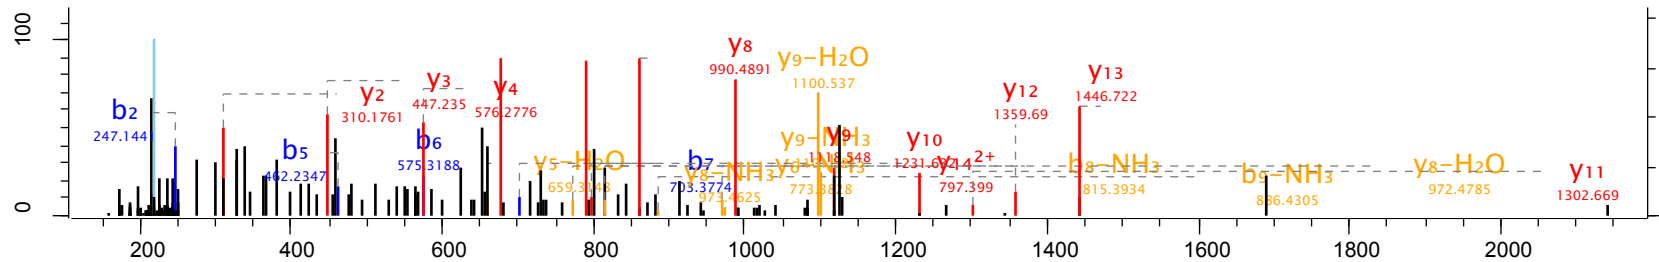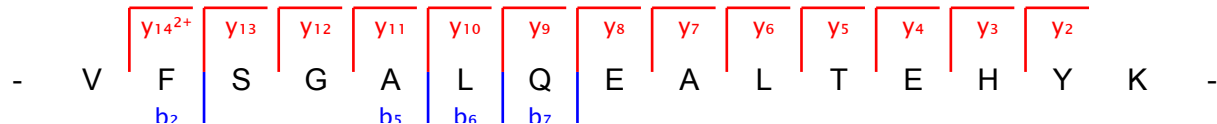

| Raw file                          | Scan  | Method   | Score  | m/z    | Gene names |
|-----------------------------------|-------|----------|--------|--------|------------|
| 20141014_fract2_dyn_5ul_E2_01_581 | 30966 | TOF; CID | 109.11 | 496.76 | SEPT3      |

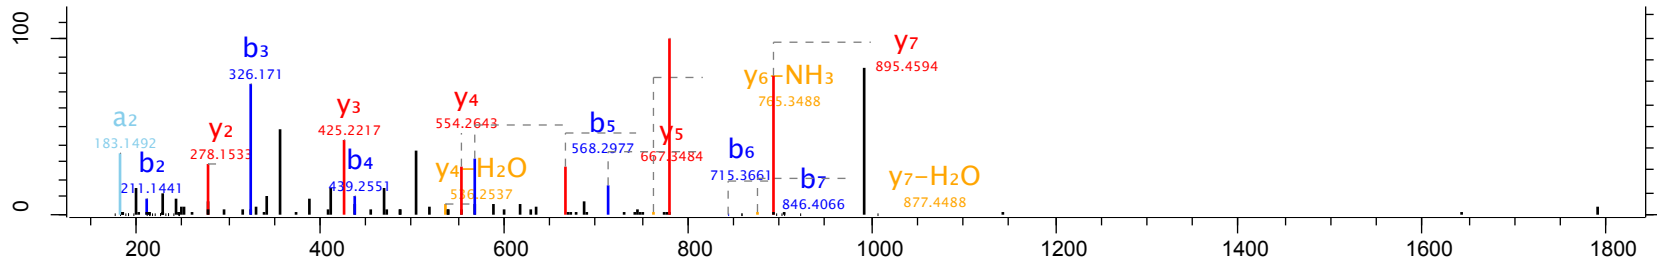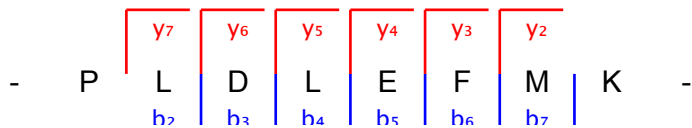



Raw file

20141014\_fract2\_dyn\_5ul\_E2\_01\_581

Scan

33792

Method

TOF; CID

Score

136.83

m/z

582.95

Gene names

TMEM138

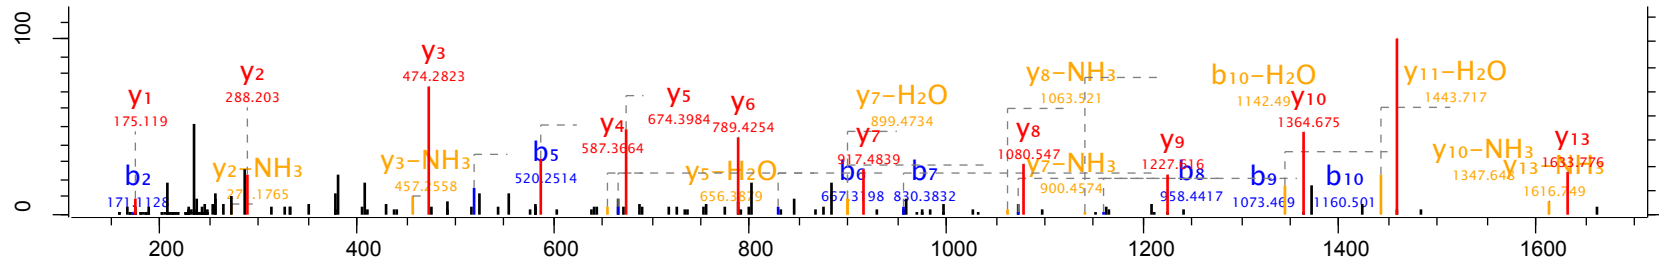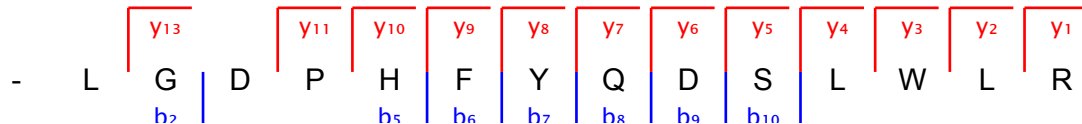

| Raw file                          | Scan  | Method   | Score | m/z    | Gene names |
|-----------------------------------|-------|----------|-------|--------|------------|
| 20141014_fract2_dyn_5ul_E2_01_581 | 35148 | TOF; CID | 90.15 | 530.29 | PHLDA1     |

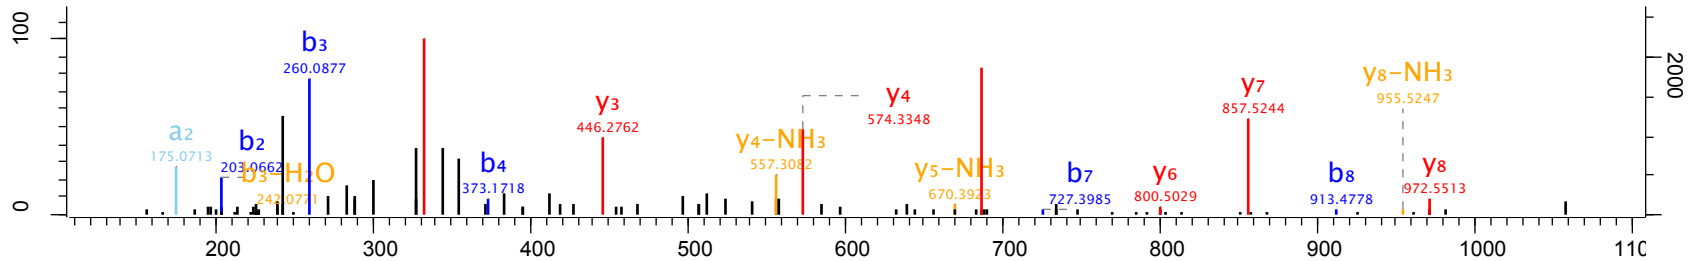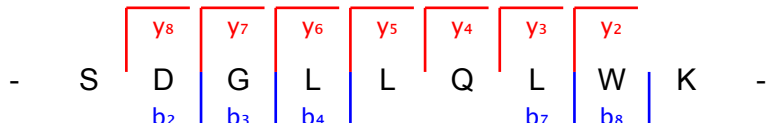

| Raw file                          | Scan  | Method   | Score | m/z    | Gene names |
|-----------------------------------|-------|----------|-------|--------|------------|
| 20141014_fract2_dyn_5ul_E2_01_581 | 37360 | TOF; CID | 82.65 | 516.97 | STK17B     |

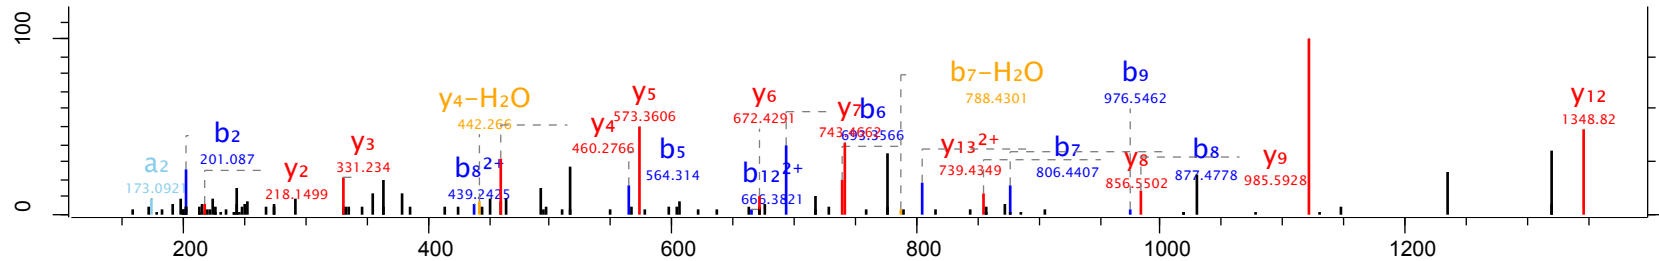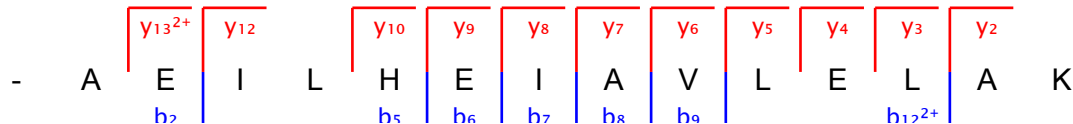

Raw file

20141014\_fract2\_dyn\_5ul\_E2\_01\_581

Scan

38373

Method

TOF; CID

Score

142.43

m/z

628.32

Gene names

SLC2A6

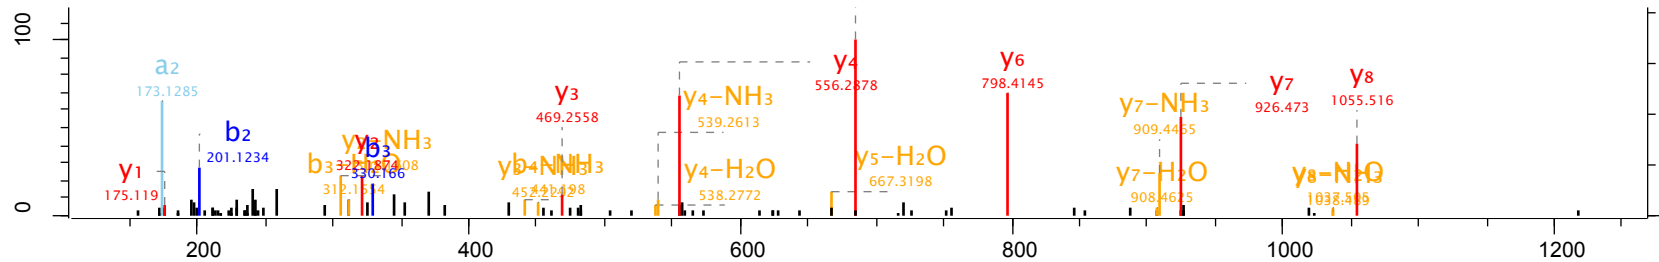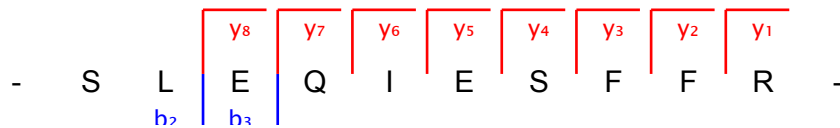

Raw file

20141014\_fract2\_dyn\_5ul\_E2\_01\_581

Scan

41523

Method

TOF; CID

Score

54.96

m/z

1068.02

Gene names

FKTN

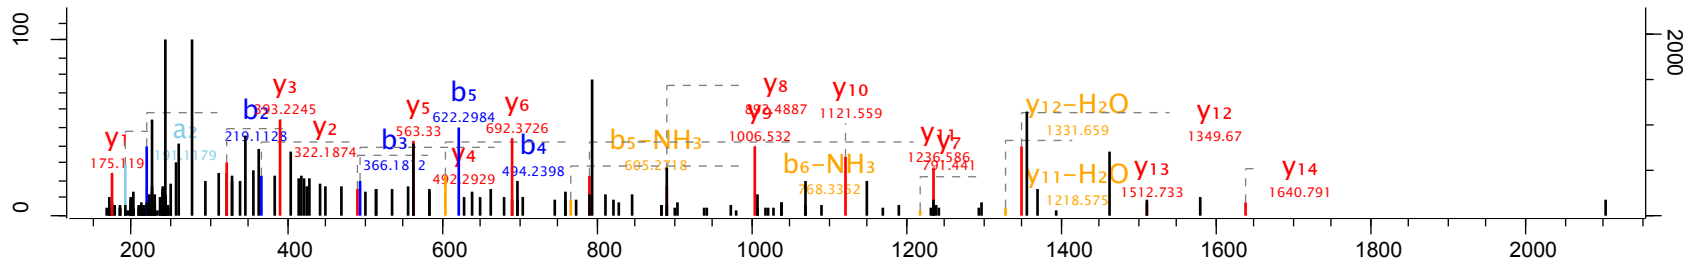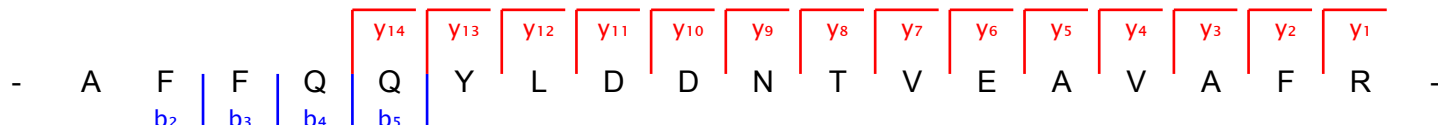

Raw file

20141014\_fract2\_dyn\_5ul\_E2\_01\_581

Scan

41524

Method

TOF; CID

Score

43.73

m/z

1040.48

Gene names

FUOM

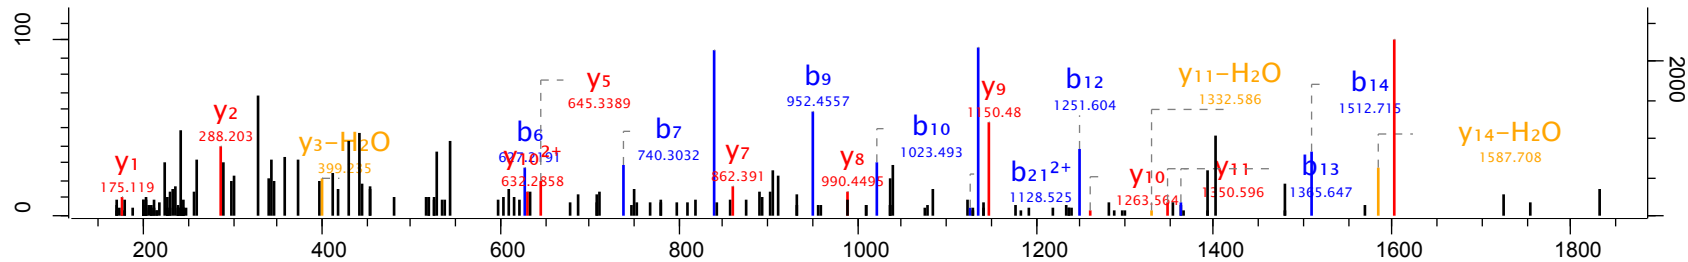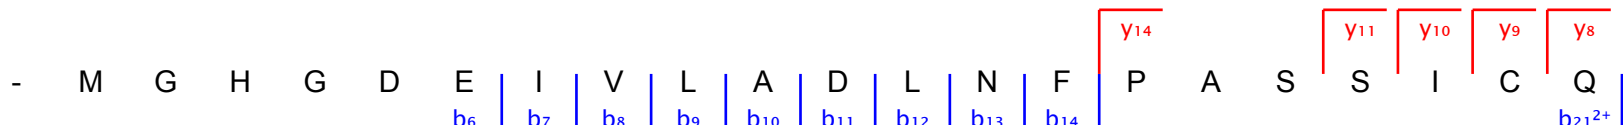

| Raw file                          | Scan | Method   | Score  | m/z    | Gene names |
|-----------------------------------|------|----------|--------|--------|------------|
| 20141014_fract3_dyn_5ul_E3_01_582 | 7727 | TOF; CID | 104.01 | 601.79 | C1orf53    |

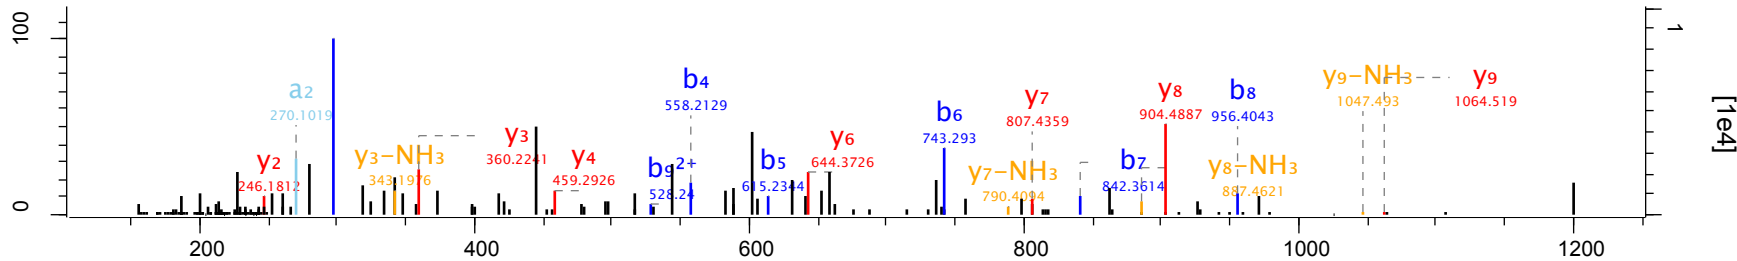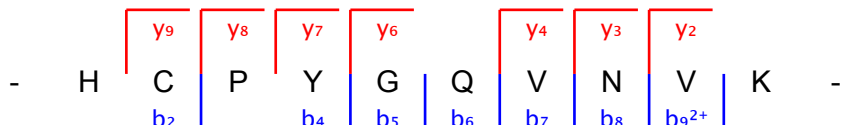

| Raw file                          | Scan  | Method   | Score | m/z    | Gene names |
|-----------------------------------|-------|----------|-------|--------|------------|
| 20141014_fract3_dyn_5ul_E3_01_582 | 11647 | TOF; CID | 84.16 | 673.36 | ZNF784     |

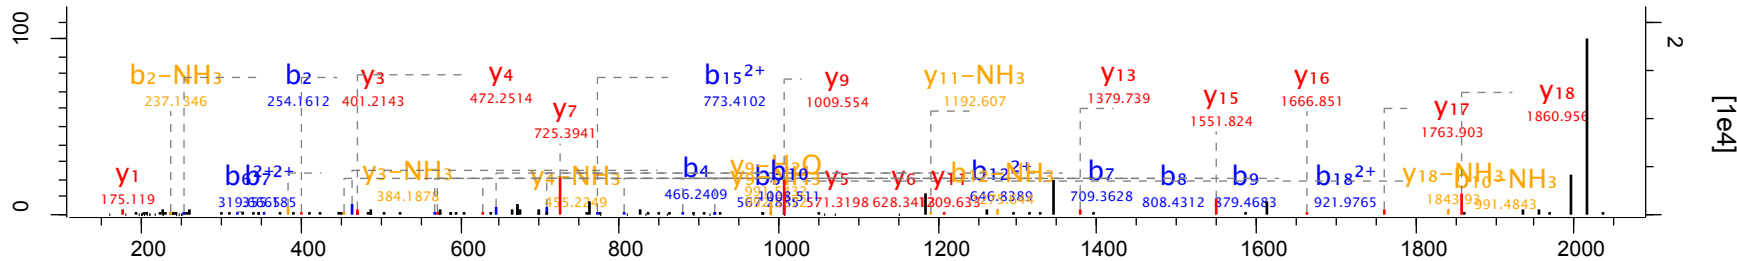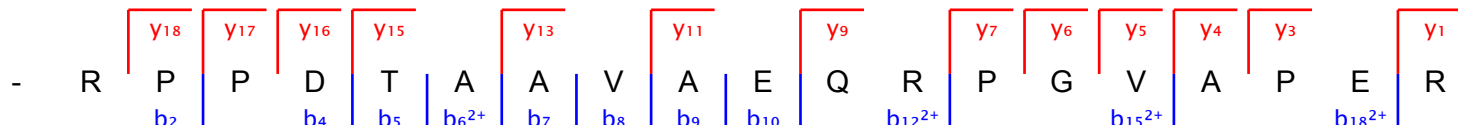



| Raw file                          | Scan  | Method   | Score | m/z    | Gene names |
|-----------------------------------|-------|----------|-------|--------|------------|
| 20141014_fract3_dyn_5ul_E3_01_582 | 12784 | TOF; CID | 55.72 | 634.33 | ADCK5      |

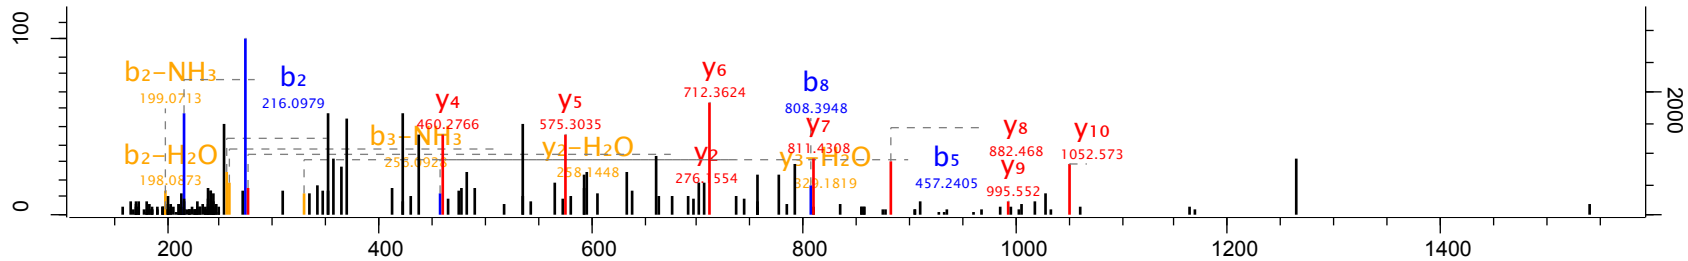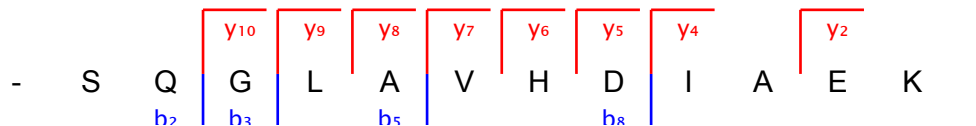

| Raw file                          | Scan  | Method   | Score | m/z    | Gene names |
|-----------------------------------|-------|----------|-------|--------|------------|
| 20141014_fract3_dyn_5ul_E3_01_582 | 13752 | TOF; CID | 49.22 | 696.34 | KLHL24     |

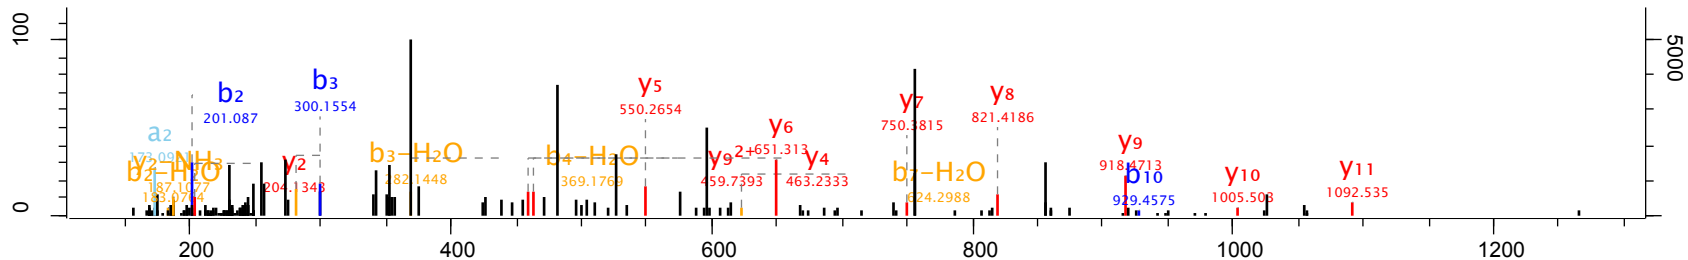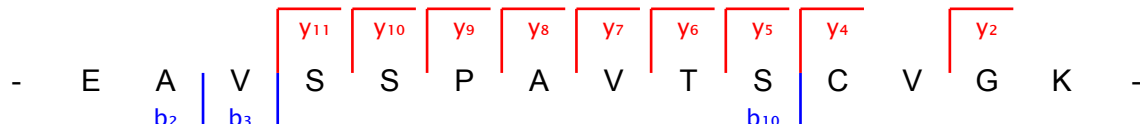

Raw file

20141014\_fract3\_dyn\_5ul\_E3\_01\_582

Scan

13989

Method

TOF; CID

Score

54.81

m/z

698.35

Gene names

IFT43

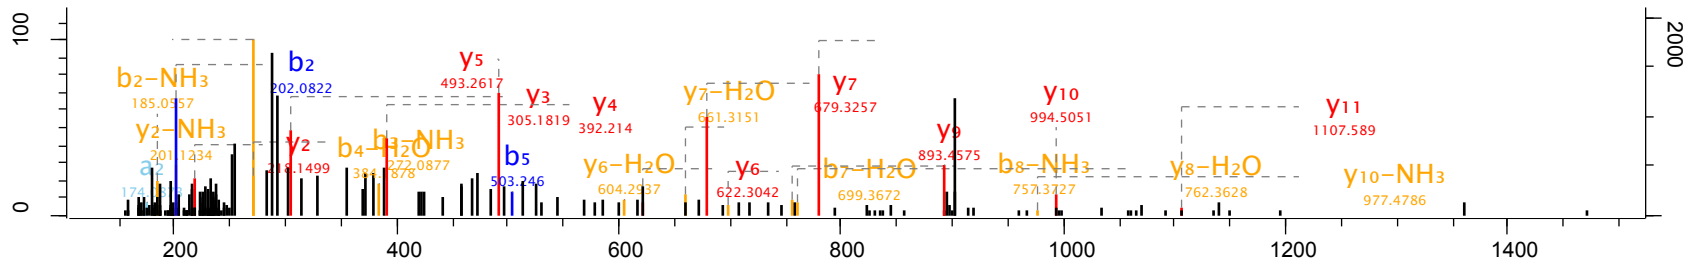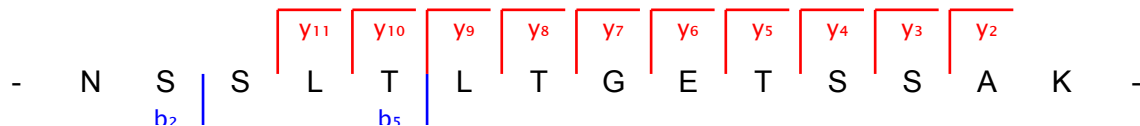

| Raw file                          | Scan  | Method   | Score  | m/z    | Gene names |
|-----------------------------------|-------|----------|--------|--------|------------|
| 20141014_fract3_dyn_5ul_E3_01_582 | 14124 | TOF; CID | 183.65 | 526.75 | C14orf1    |

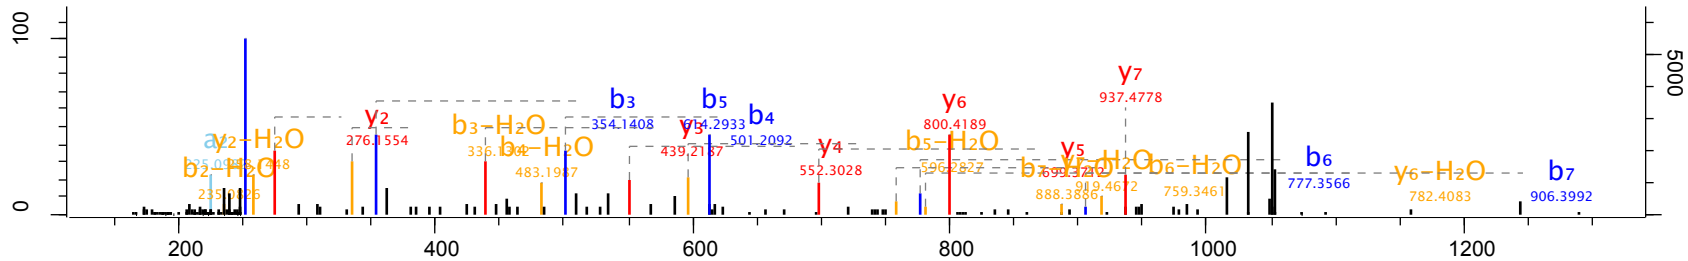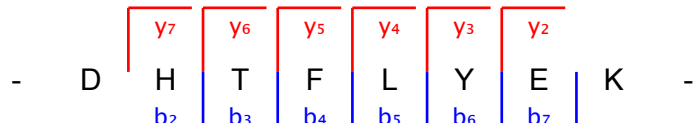

| Raw file                          | Scan  | Method   | Score | m/z   | Gene names |
|-----------------------------------|-------|----------|-------|-------|------------|
| 20141014_fract3_dyn_5ul_E3_01_582 | 15692 | TOF; CID | 90.7  | 592.8 | MFSD1      |

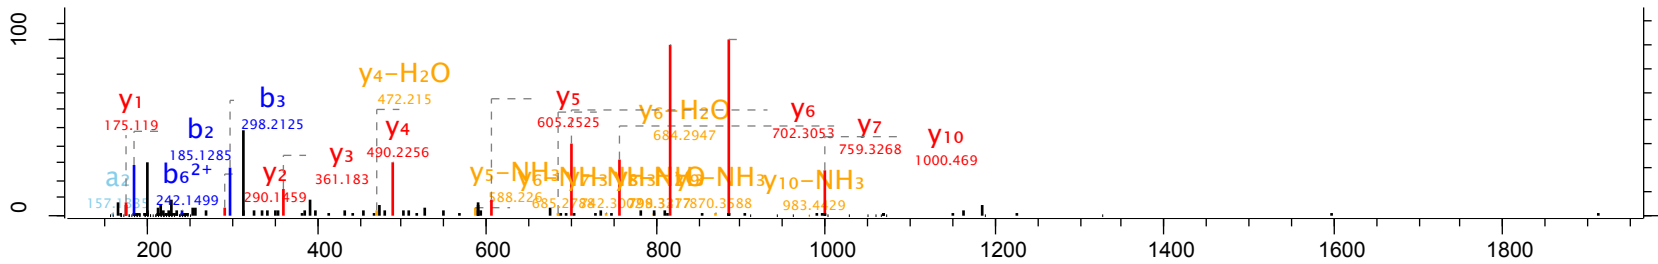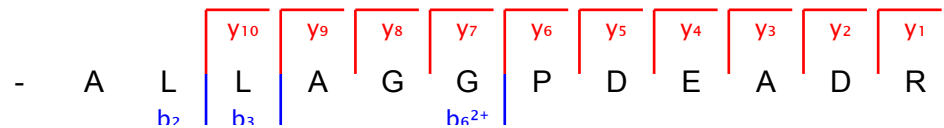

| Raw file                          | Scan  | Method   | Score | m/z    | Gene names |
|-----------------------------------|-------|----------|-------|--------|------------|
| 20141014_fract3_dyn_5ul_E3_01_582 | 17790 | TOF; CID | 71.18 | 658.84 | ZMYM6NB    |

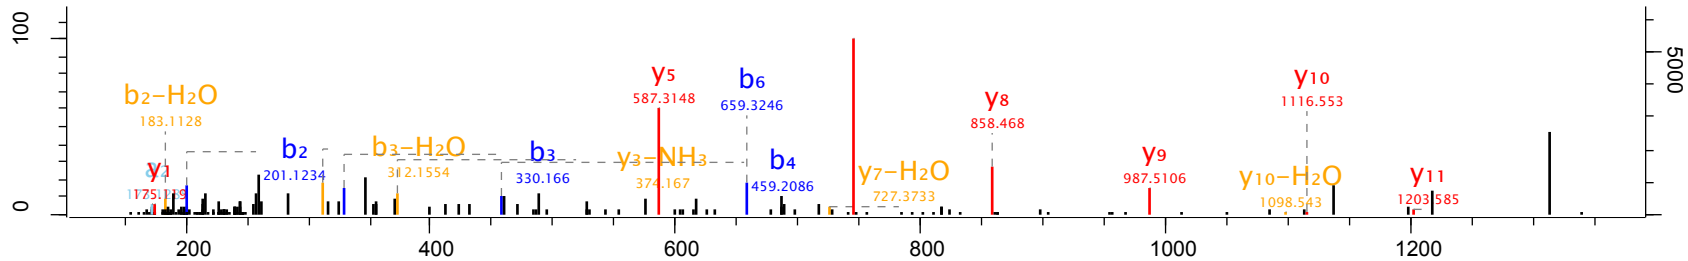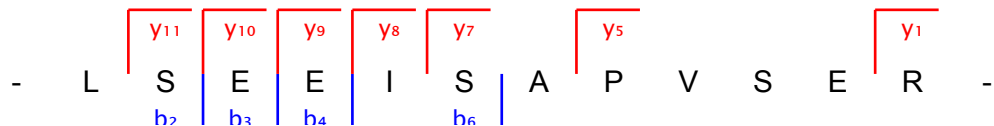

Raw file

20141014\_fract3\_dyn\_5ul\_E3\_01\_582

Scan

21322

Method

TOF; CID

Score

79.49

m/z

764.63

Gene names

SMIM14

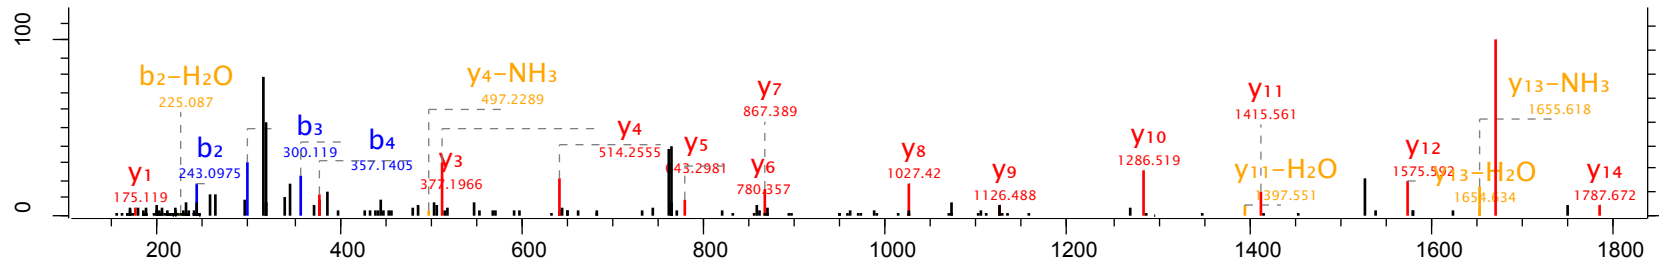

ac

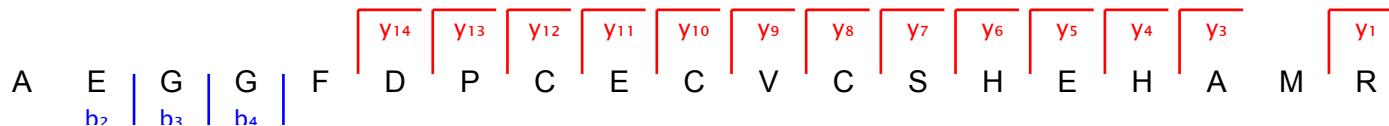

Raw file

20141014\_fract3\_dyn\_5ul\_E3\_01\_582

Scan

22524

Method

TOF; CID

Score

81.62

m/z

446.6

Gene names

HMGN5

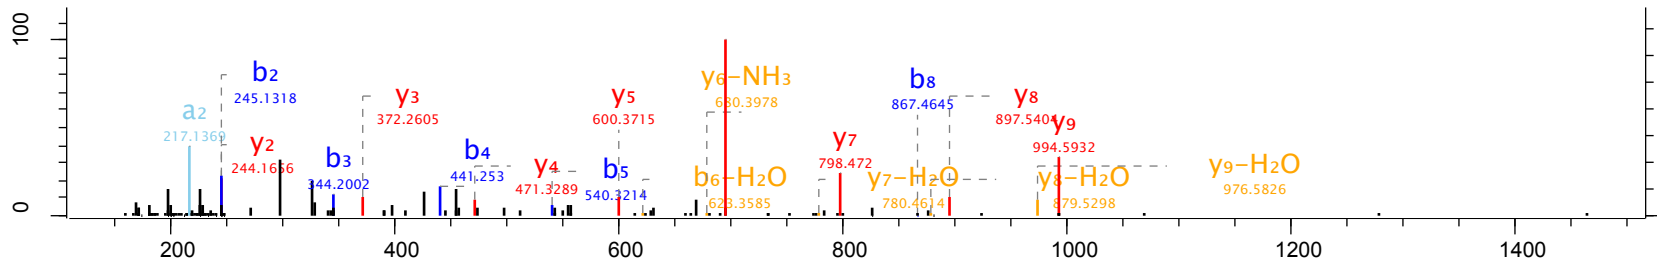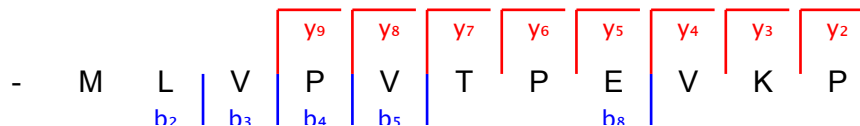



| Raw file                          | Scan  | Method   | Score  | m/z    | Gene names |
|-----------------------------------|-------|----------|--------|--------|------------|
| 20141014_fract3_dyn_5ul_E3_01_582 | 24106 | TOF; CID | 186.81 | 507.59 | CDC26      |

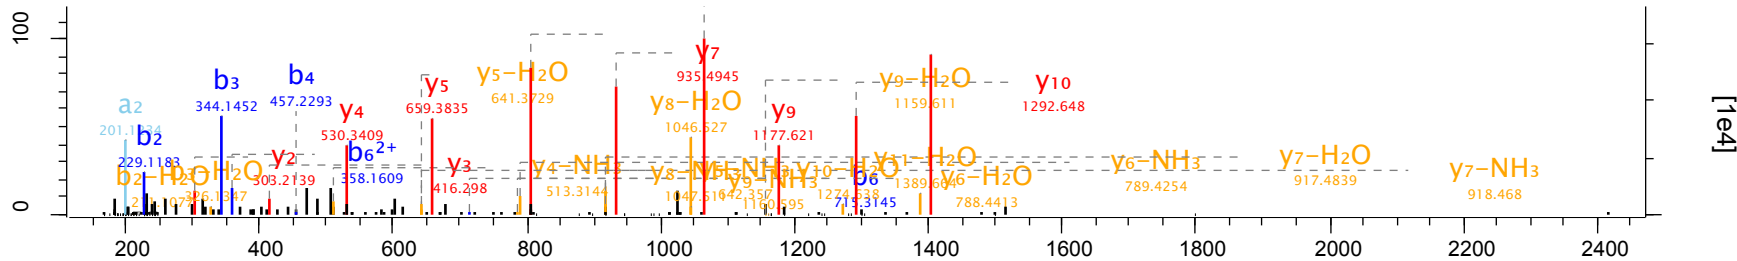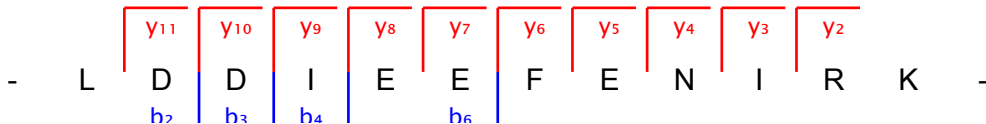

| Raw file                          | Scan  | Method   | Score | m/z    | Gene names |
|-----------------------------------|-------|----------|-------|--------|------------|
| 20141014_fract3_dyn_5ul_E3_01_582 | 25926 | TOF; CID | 51.64 | 669.37 | GREB1      |

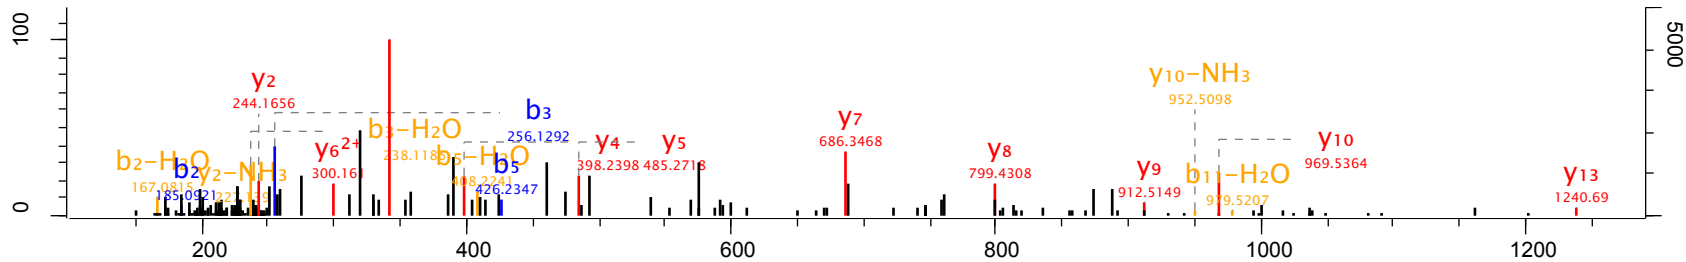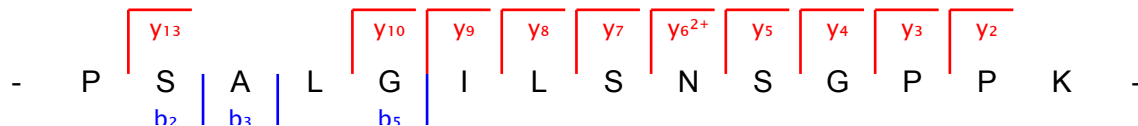

Raw file

20141014\_fract3\_dyn\_5ul\_E3\_01\_582

Scan

27220

Method

TOF; CID

Score

81.64

m/z

1040.48

Gene names

TCTEX1D2

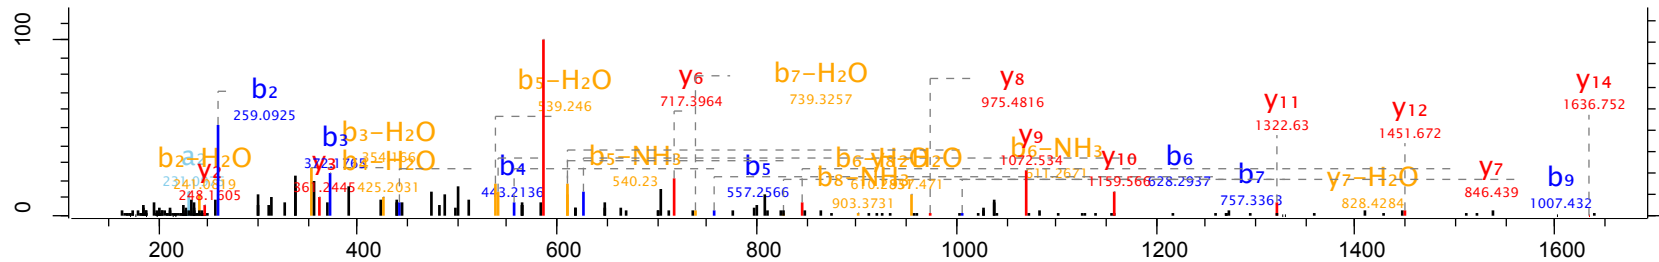

- E E L A N A E Y S P E E M P Q L T K -

b<sub>2</sub> | b<sub>3</sub> | b<sub>4</sub> | b<sub>5</sub> | b<sub>6</sub> | b<sub>7</sub> | b<sub>9</sub>

y<sub>14</sub> | y<sub>12</sub> | y<sub>11</sub> | y<sub>10</sub> | y<sub>9</sub> | y<sub>8</sub> | y<sub>7</sub> | y<sub>6</sub> | y<sub>5</sub> | y<sub>3</sub> | y<sub>2</sub>

| Raw file                          | Scan  | Method   | Score | m/z    | Gene names |
|-----------------------------------|-------|----------|-------|--------|------------|
| 20141014_fract3_dyn_5ul_E3_01_582 | 28058 | TOF; CID | 58.32 | 487.59 | TMEM231    |

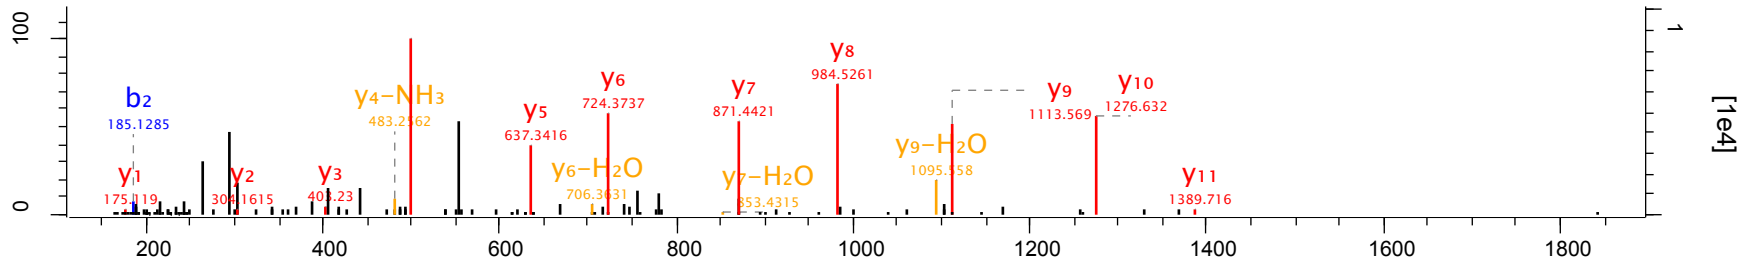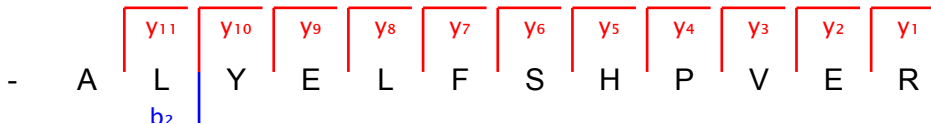

Raw file

20141014\_fract3\_dyn\_5ul\_E3\_01\_582

Scan

28977

Method

TOF; CID

Score

72.68

m/z

609.33

Gene names

SMIM10

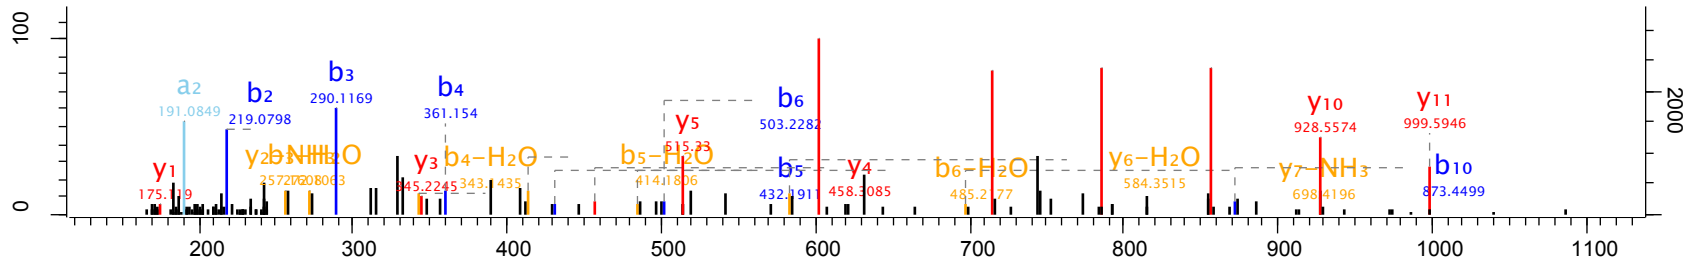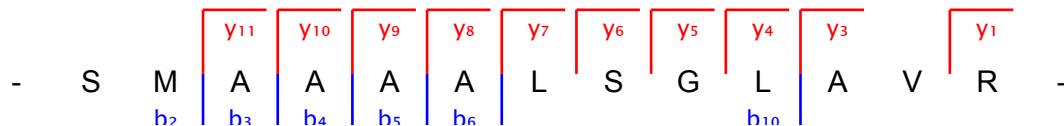

Raw file

20141014\_fract3\_dyn\_5ul\_E3\_01\_582

Scan

30250

Method

TOF; CID

Score

97.16

m/z

627.38

Gene names

MRPL34

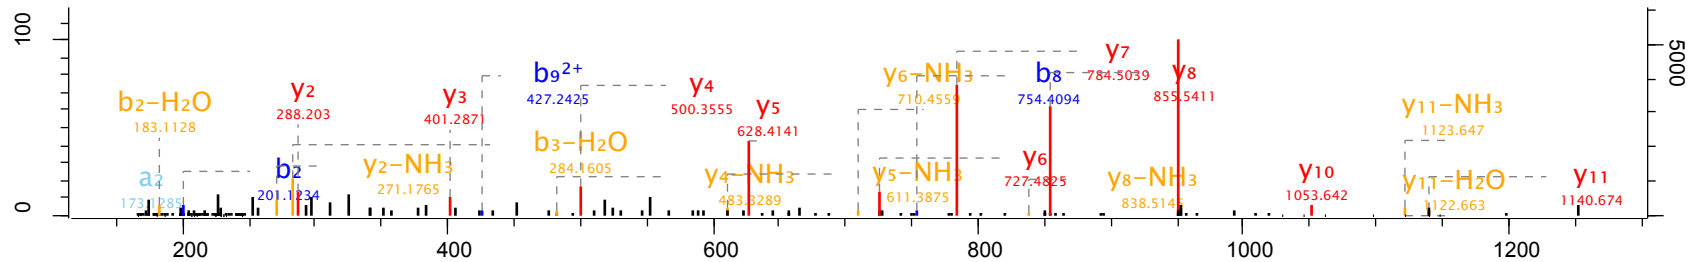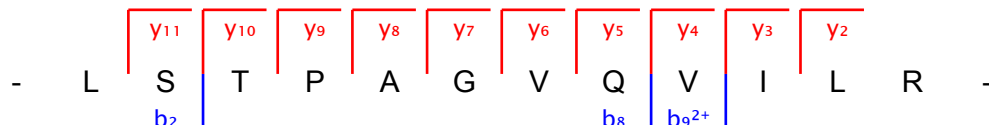

| Raw file                          | Scan  | Method   | Score | m/z    | Gene names |
|-----------------------------------|-------|----------|-------|--------|------------|
| 20141014_fract3_dyn_5ul_E3_01_582 | 30675 | TOF; CID | 50.09 | 695.39 | CCDC71L    |

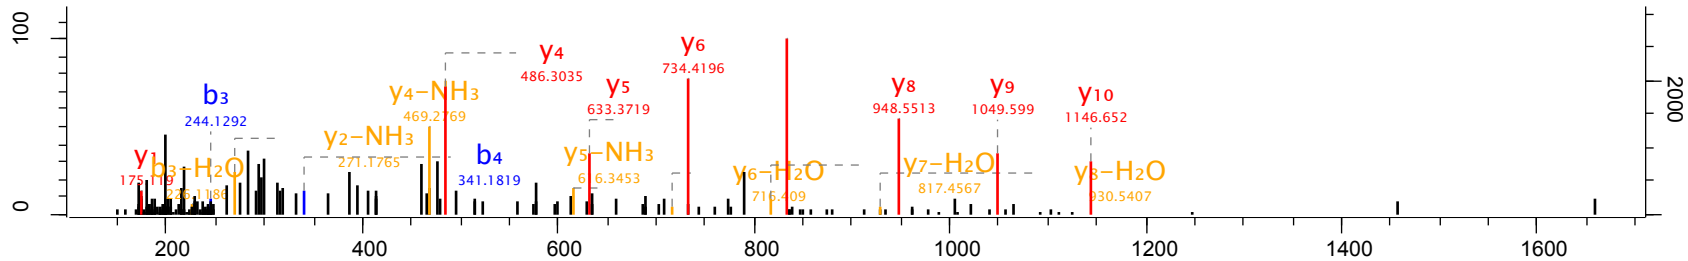

- A A T P T L T T F P T I R -

b<sub>3</sub> (under T)  
b<sub>4</sub> (under P)  
y<sub>10</sub> (over P)  
y<sub>9</sub> (over T)  
y<sub>8</sub> (over L)  
y<sub>7</sub> (over T)  
y<sub>6</sub> (over T)  
y<sub>5</sub> (over F)  
y<sub>4</sub> (over P)  
y<sub>1</sub> (over R)

Raw file

Scan

Method

Score

m/z

Gene names

20141014\_fract3\_dyn\_5ul\_E3\_01\_582

38024

TOF; CID

65.04

777.4

TPRA1

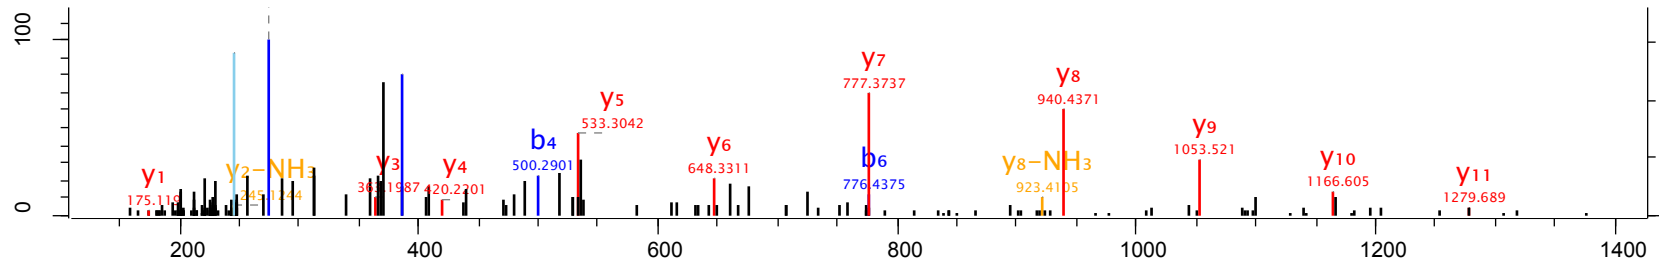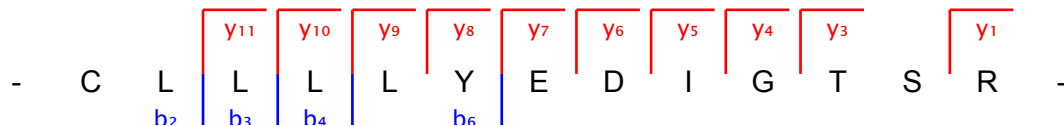



Raw file

20141014\_fract3\_dyn\_5ul\_E3\_01\_582

Scan

38068

Method

TOF; CID

Score

86.8

m/z

798.44

Gene names

CLDN12

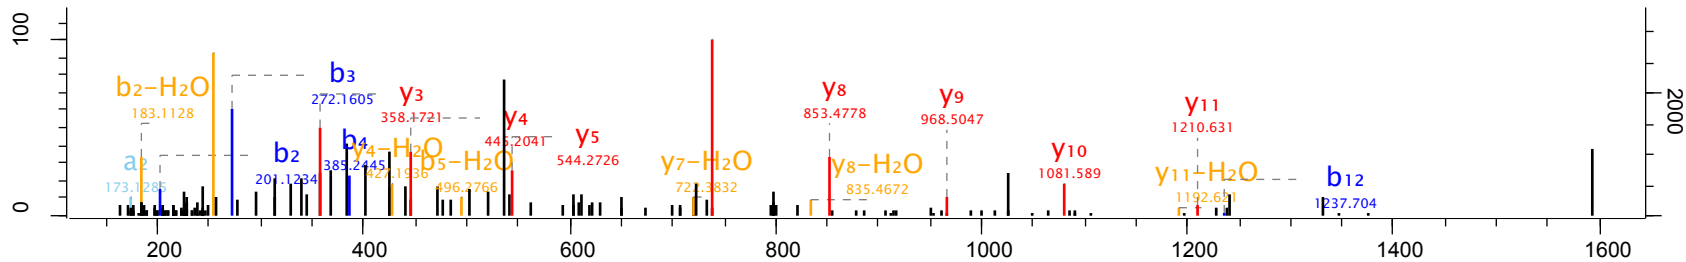

- L S A I E I D I P V V S H T T -  
 b<sub>2</sub> | b<sub>3</sub> | b<sub>4</sub> | y<sub>11</sub> | y<sub>10</sub> | y<sub>9</sub> | y<sub>8</sub> | y<sub>7</sub> | y<sub>5</sub> | y<sub>4</sub> | y<sub>3</sub>  
 b<sub>12</sub>

Raw file

20141014\_fract4\_dyn\_5ul\_E4\_01\_583

Scan

3789

Method

TOF; CID

Score

111.01

m/z

438.2

Gene names

SMOC2

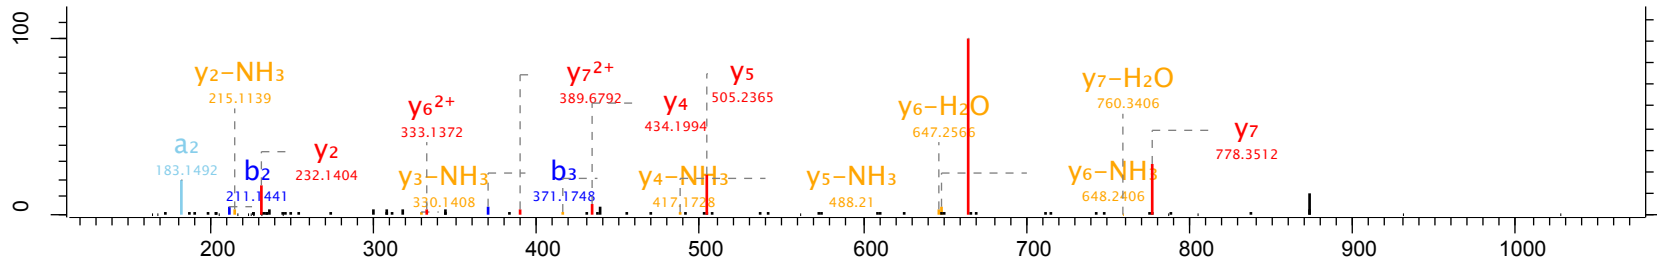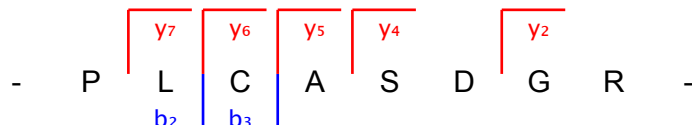

Raw file

20141014\_fract4\_dyn\_5ul\_E4\_01\_583

Scan

4789

Method

TOF; CID

Score

132.09

m/z

416.74

Gene names

TP53INP2

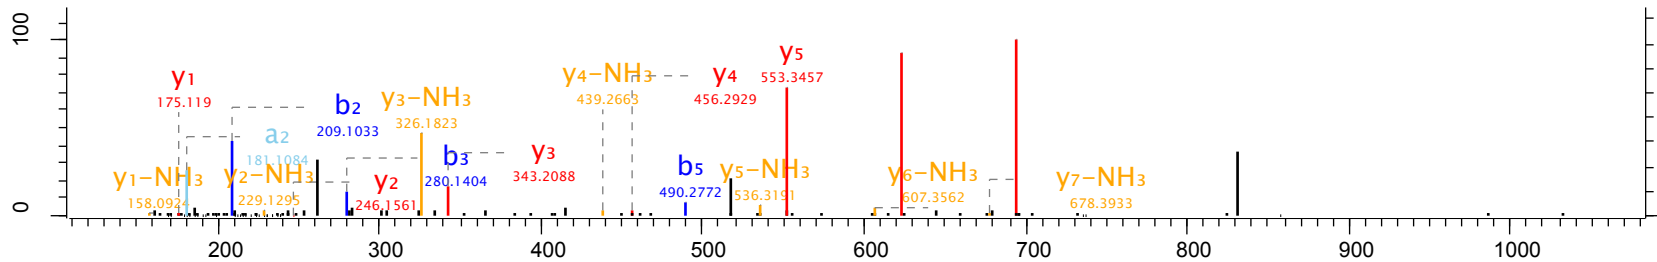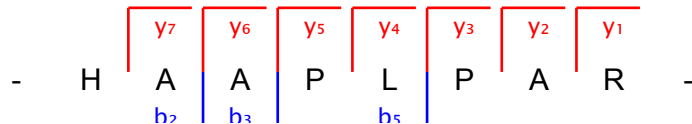

Raw file

20141014\_fract4\_dyn\_5ul\_E4\_01\_583

Scan

8664

Method

TOF; CID

Score

130.77

m/z

406.19

Gene names

CID

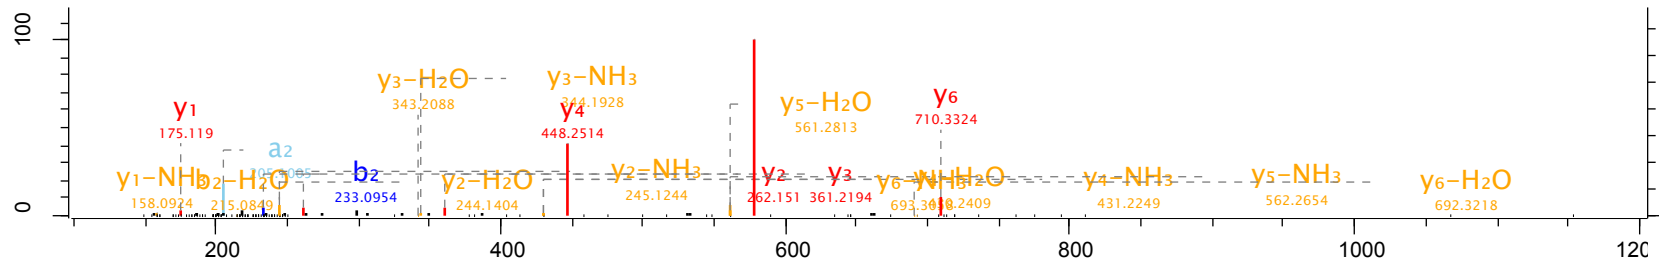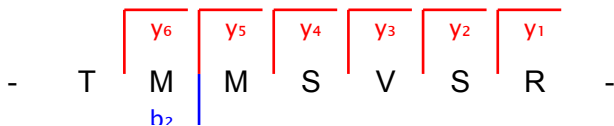

| Raw file                          | Scan | Method   | Score | m/z    | Gene names    |
|-----------------------------------|------|----------|-------|--------|---------------|
| 20141014_fract4_dyn_5ul_E4_01_583 | 9921 | TOF; CID | 85.35 | 626.26 | ZNF652;ZBTB47 |

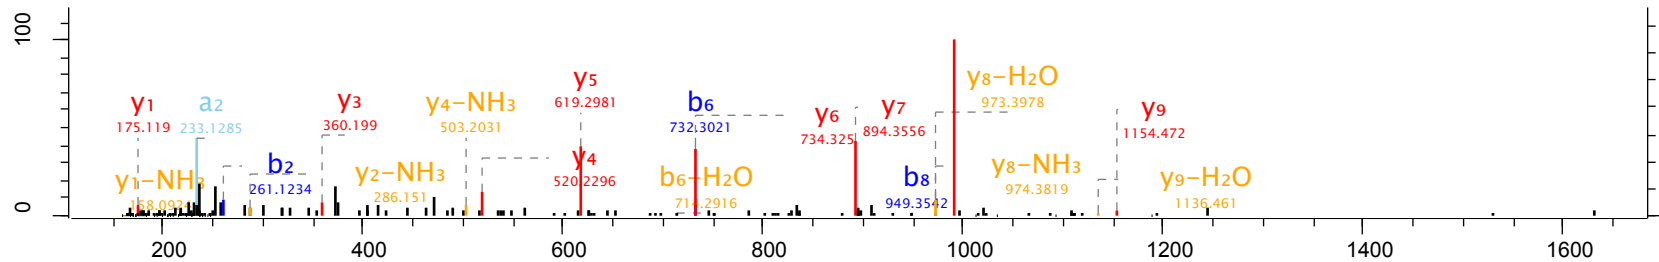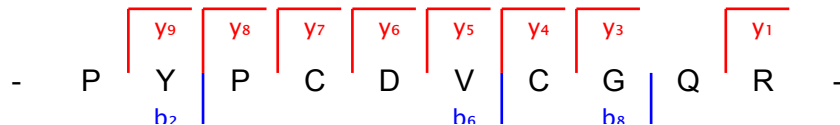

Raw file

20141014\_fract4\_dyn\_5ul\_E4\_01\_583

Scan

17515

Method

TOF; CID

Score

160.81

m/z

657.3

Gene names

DYNLT3

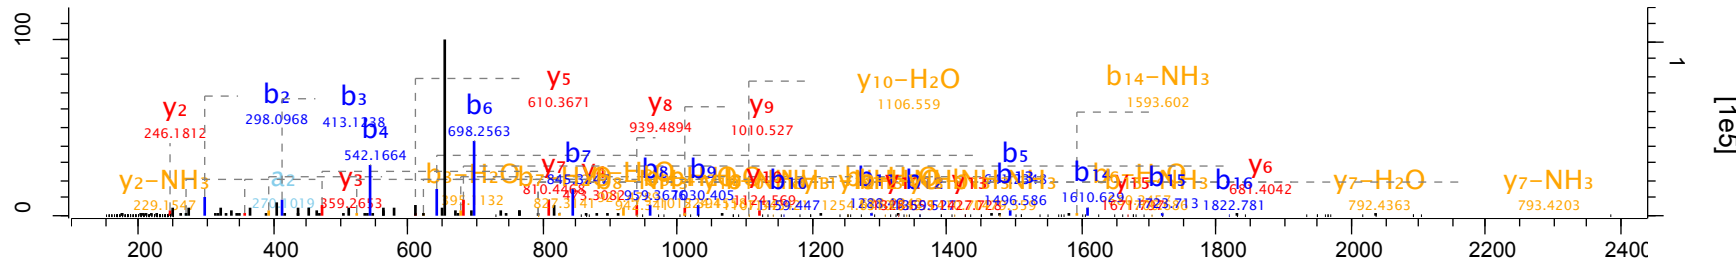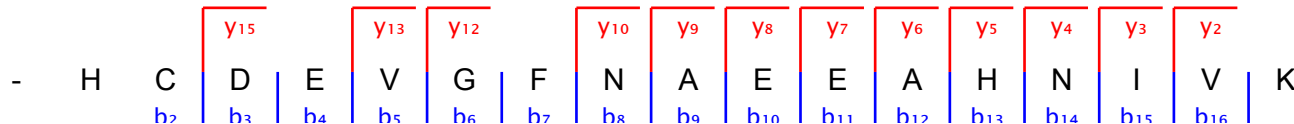

Raw file

20141014\_fract4\_dyn\_5ul\_E4\_01\_583

Scan

19196

Method

TOF; CID

Score

91.28

m/z

650.82

Gene names

SLC36A4

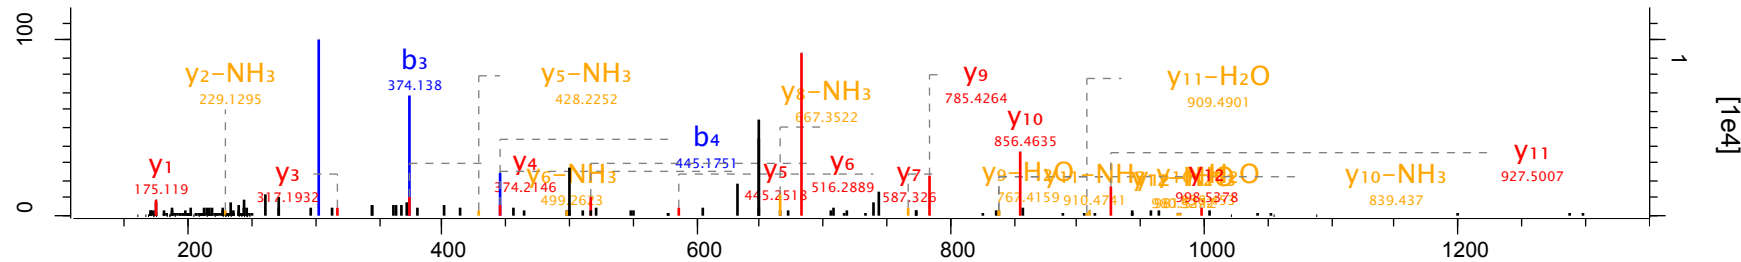

ac

M E A A A T P A A A G A A R -

b2

b3

b4

Raw file

20141014\_fract4\_dyn\_5ul\_E4\_01\_583

Scan

20269

Method

TOF; CID

Score

57.43

m/z

787.32

Gene names

FHL2

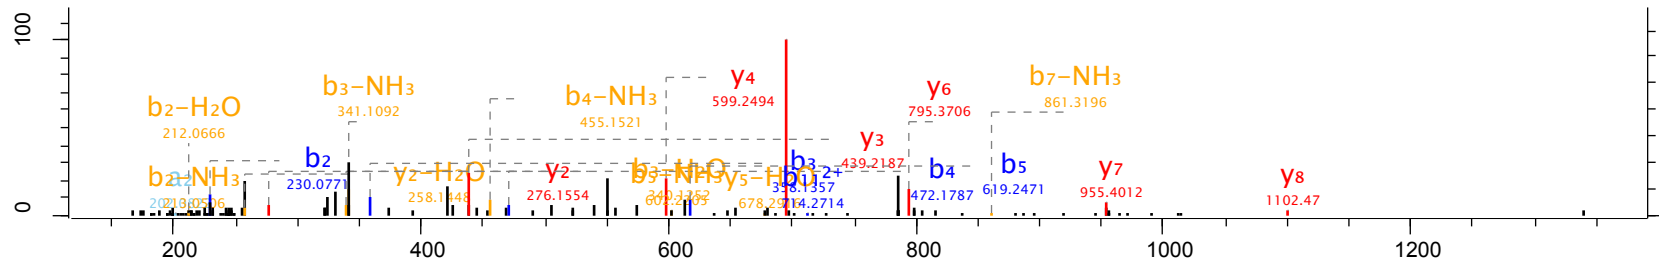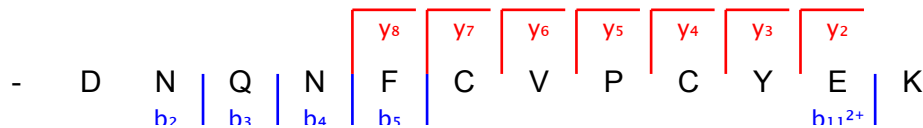



Raw file

20141014\_fract4\_dyn\_5ul\_E4\_01\_583

Scan

20370

Method

TOF; CID

Score

109.83

m/z

532.61

Gene names

SOCS3

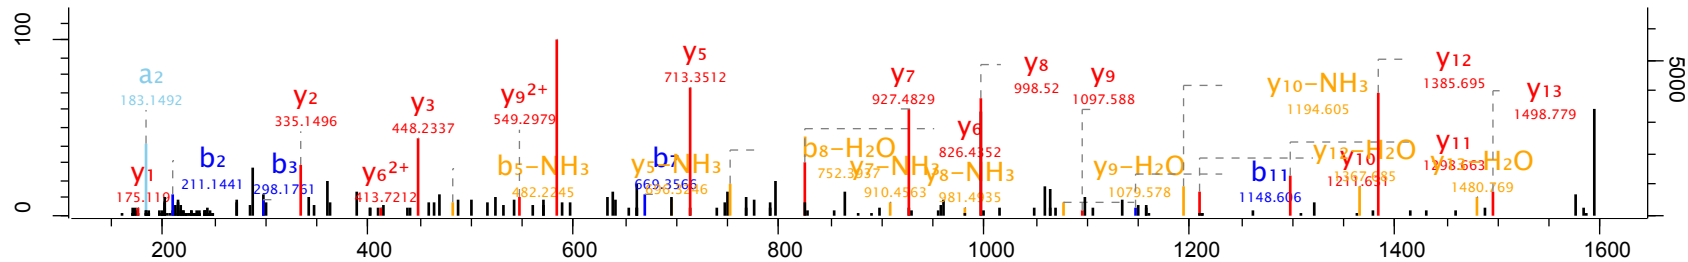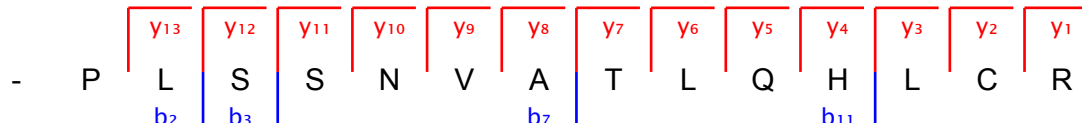

Raw file

20141014\_fract4\_dyn\_5ul\_E4\_01\_583

Scan

20560

Method

TOF; CID

Score

111.52

m/z

709.85

Gene names

CYB561D2

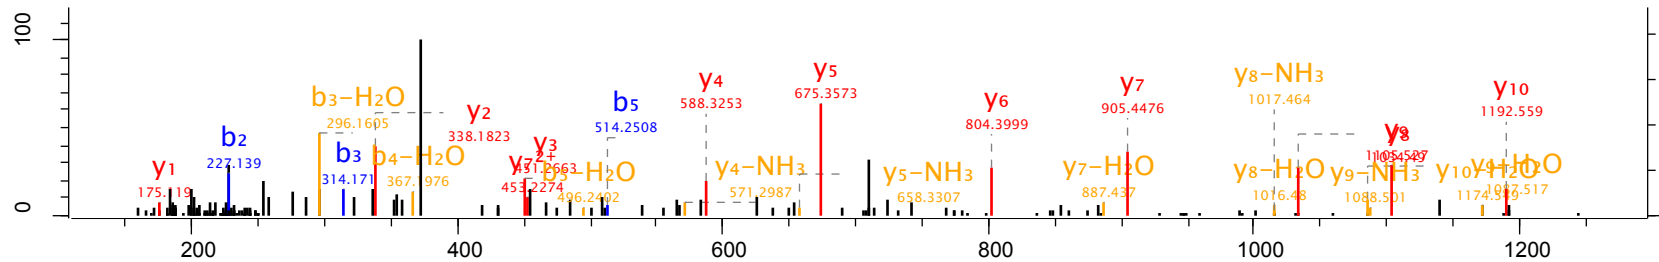

ac

- A L S A E T E S H I Y R -

          b<sub>2</sub> b<sub>3</sub> b<sub>5</sub>

          y<sub>10</sub> y<sub>9</sub> y<sub>8</sub> y<sub>7</sub> y<sub>6</sub> y<sub>5</sub> y<sub>4</sub> y<sub>3</sub> y<sub>2</sub> y<sub>1</sub>

Raw file

20141014\_fract4\_dyn\_5ul\_E4\_01\_583

Scan

24861

Method

TOF; CID

Score

64.24

m/z

814.89

Gene names

C4orf3

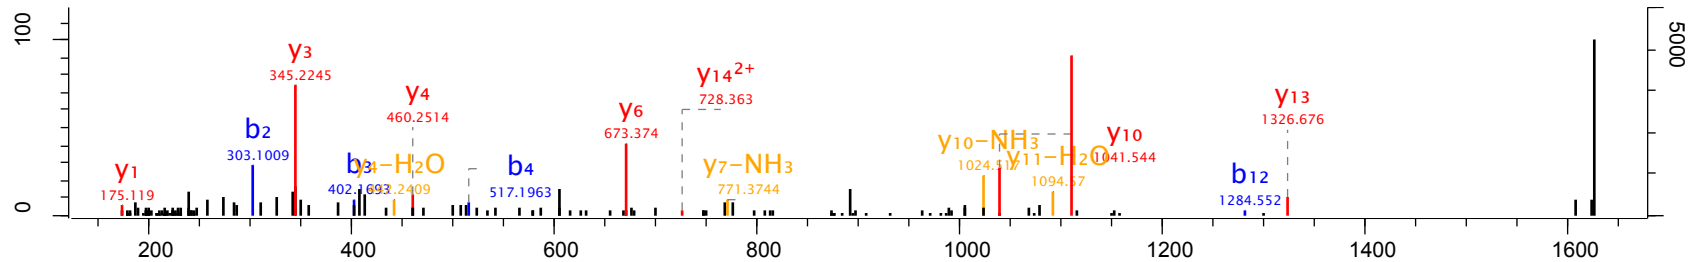

ac

M E V D A P G V D G R D G L R -  
 b<sub>2</sub> b<sub>3</sub> b<sub>4</sub> b<sub>12</sub>

y<sub>14</sub><sup>2+</sup> y<sub>13</sub> y<sub>11</sub> y<sub>10</sub> y<sub>6</sub> y<sub>4</sub> y<sub>3</sub> y<sub>1</sub>

Raw file

20141014\_fract4\_dyn\_5ul\_E4\_01\_583

Scan

25014

Method

TOF; CID

Score

59.91

m/z

668.35

Gene names

SYTL1

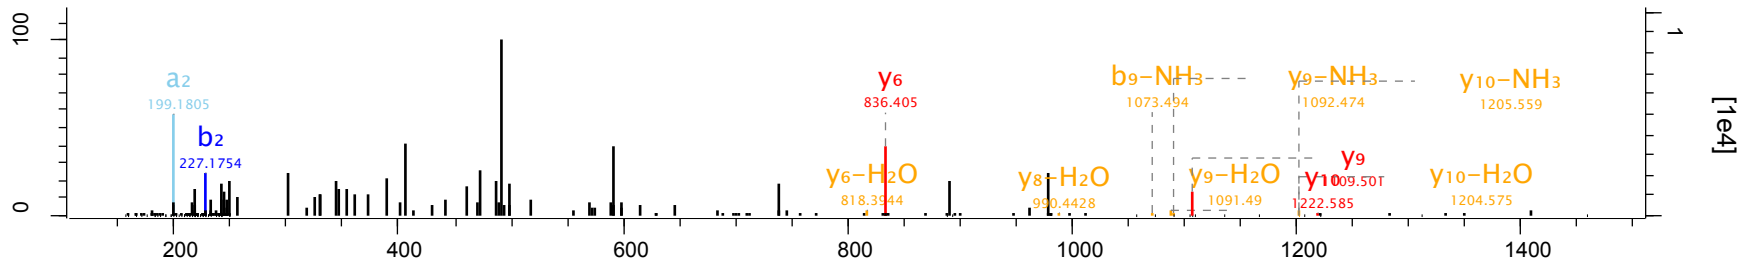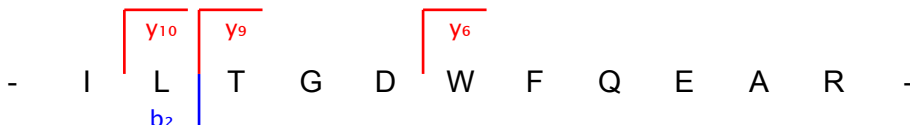

Raw file

20141014\_fract4\_dyn\_5ul\_E4\_01\_583

Scan

25540

Method

TOF; CID

Score

65.37

m/z

785.87

Gene names

HGSNAT

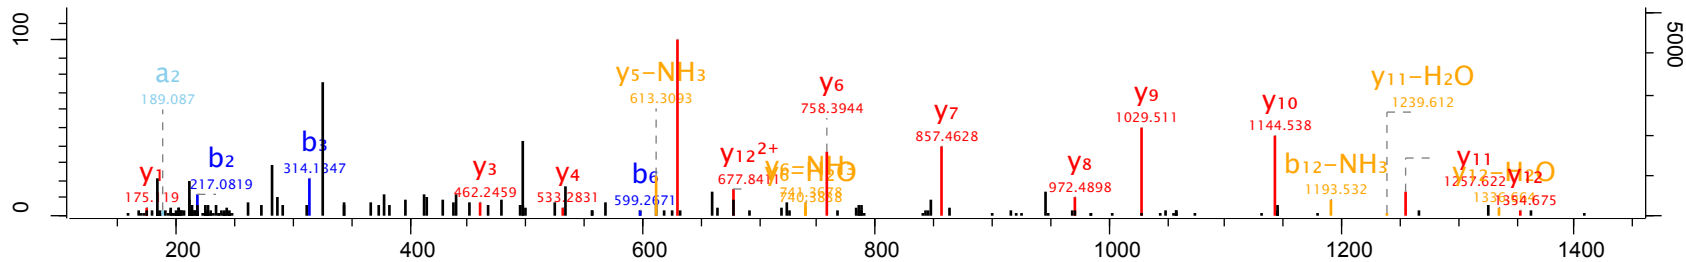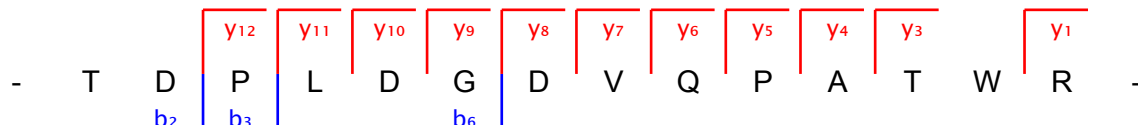

| Raw file                          | Scan  | Method   | Score | m/z    | Gene names |
|-----------------------------------|-------|----------|-------|--------|------------|
| 20141014_fract4_dyn_5ul_E4_01_583 | 26021 | TOF; CID | 60.16 | 586.84 | KATNAL2    |

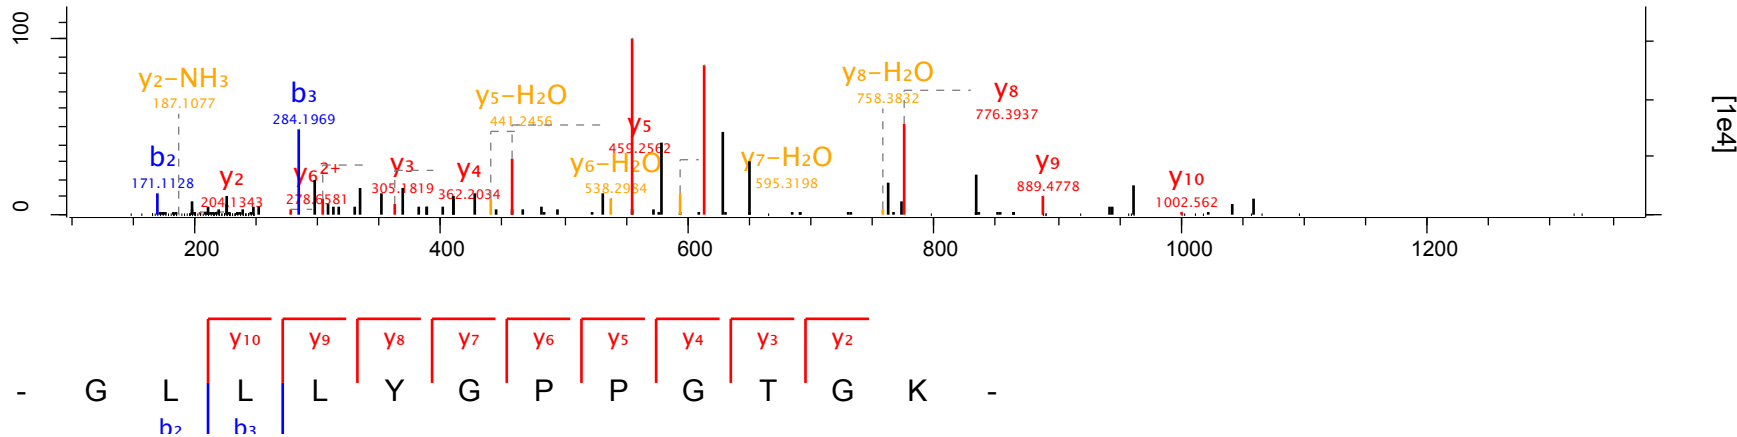

Raw file

20141014\_fract4\_dyn\_5ul\_E4\_01\_583

Scan

26163

Method

TOF; CID

Score

57.97

m/z

755.91

Gene names

KLF10

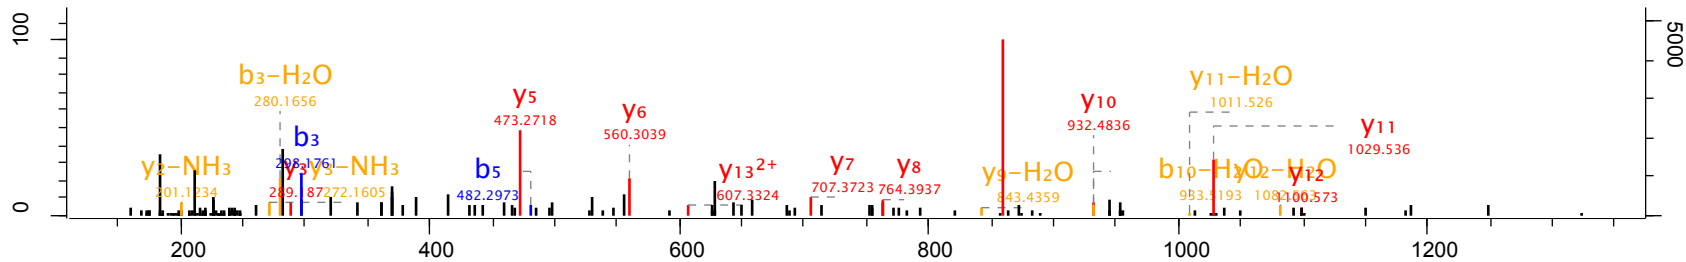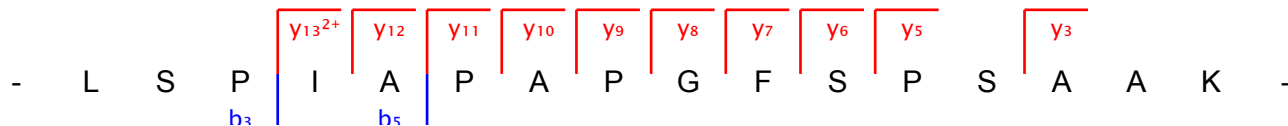

Raw file

20141014\_fract4\_dyn\_5ul\_E4\_01\_583

Scan

26226

Method

TOF; CID

Score

27.53

m/z

1132.86

Gene names

TECPR1

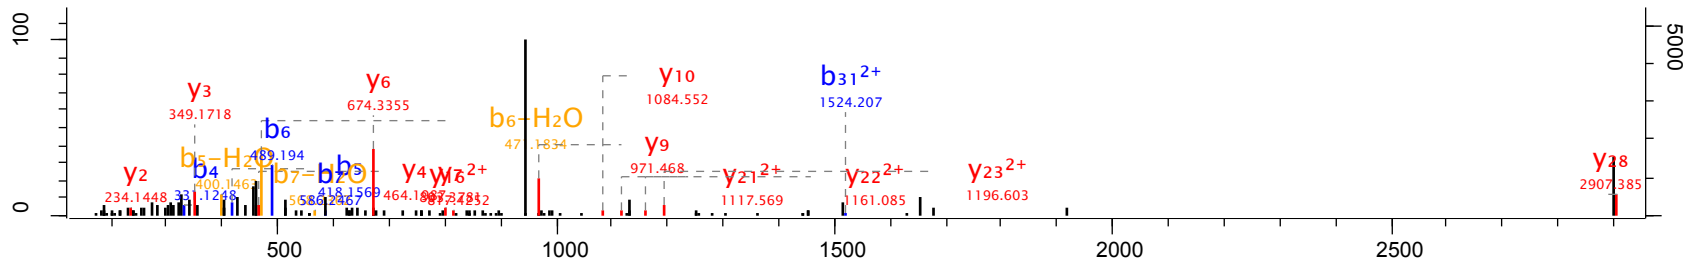

- G S G E | S | A | P | S D T D A S S E V E R P G P

h<sub>4</sub> | h<sub>5</sub> | h<sub>6</sub> | h<sub>7</sub>

y<sub>28</sub>

y<sub>23</sub><sup>2+</sup> | y<sub>22</sub><sup>2+</sup> | y<sub>21</sub><sup>2+</sup>

y<sub>16</sub><sup>2+</sup>



Raw file

20141014\_fract4\_dyn\_5ul\_E4\_01\_583

Scan

26734

Method

TOF; CID

Score

78.32

m/z

721.36

Gene names

CHURC1-FNTB;CHURC1

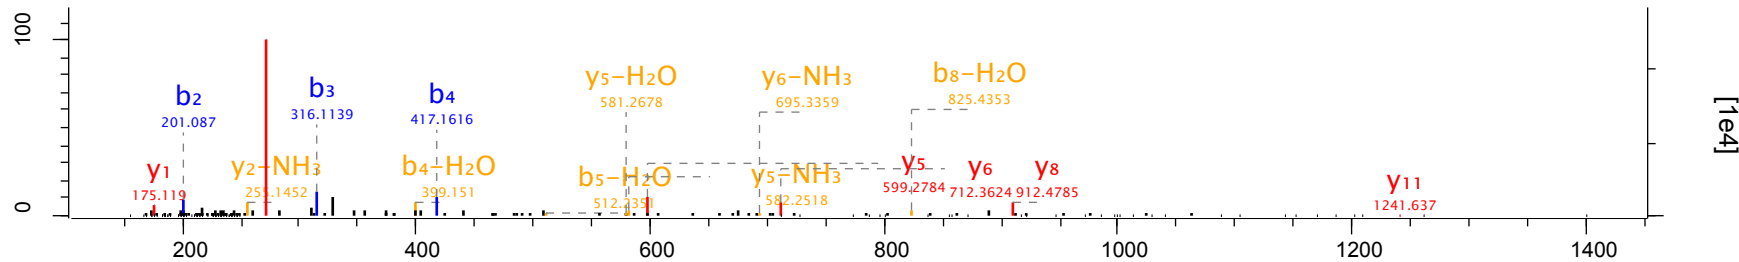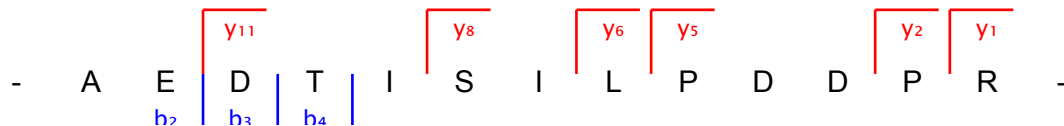

| Raw file                          | Scan  | Method   | Score | m/z    | Gene names |
|-----------------------------------|-------|----------|-------|--------|------------|
| 20141014_fract4_dyn_5ul_E4_01_583 | 26770 | TOF; CID | 52.53 | 855.39 | METTL7B    |

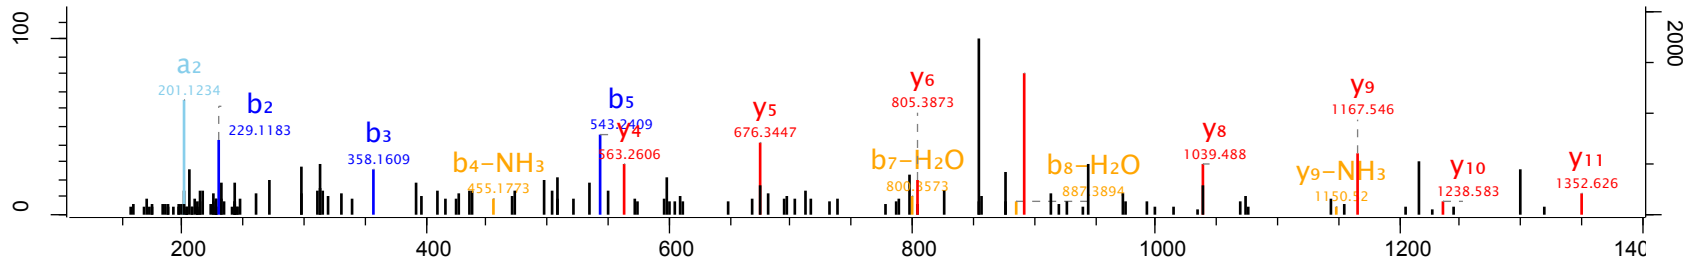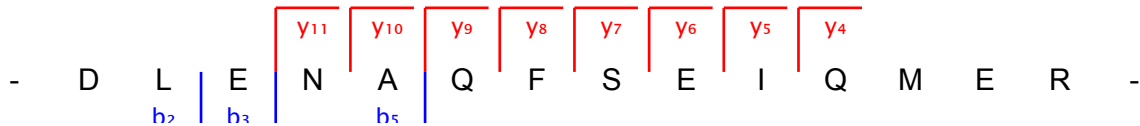

Raw file

20141014\_fract4\_dyn\_5ul\_E4\_01\_583

Scan

27431

Method

TOF; CID

Score

51.09

m/z

609.32

Gene names

SETD6

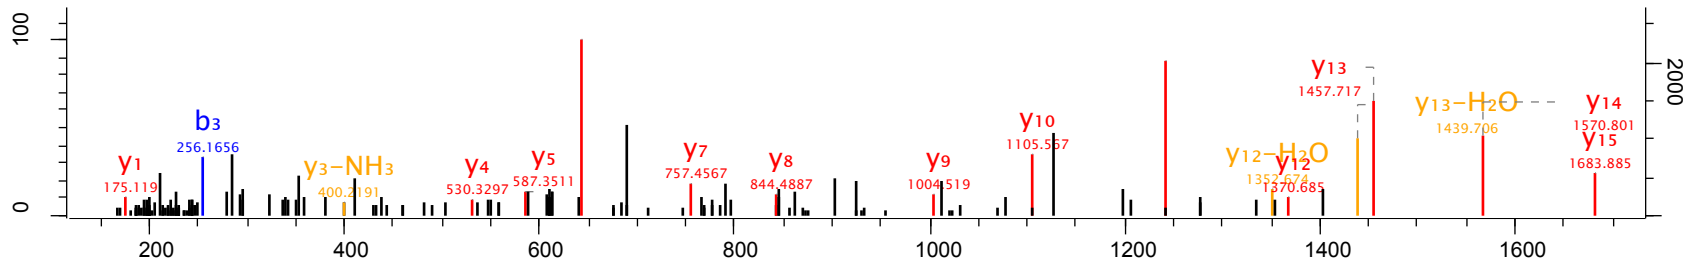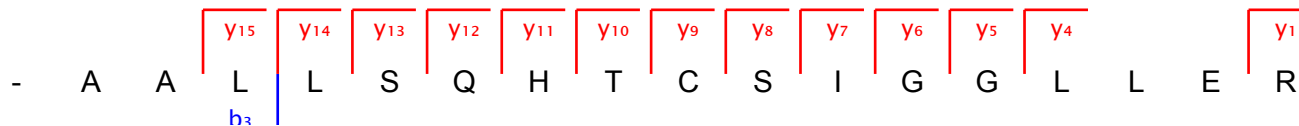

Raw file

Scan

Method

Score

m/z

Gene names

20141014\_fract4\_dyn\_5ul\_E4\_01\_583

28844

TOF; CID

87.43

858.42

CLUAP1

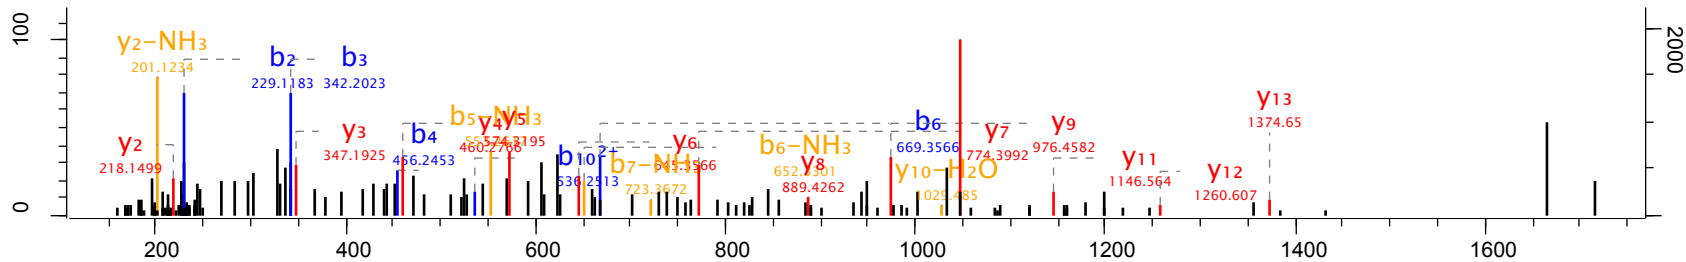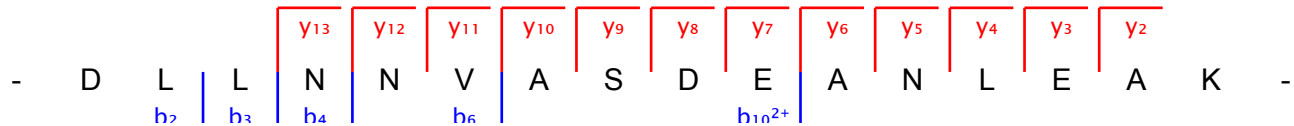

Raw file

Scan

Method

Score

m/z

Gene names

20141014\_fract4\_dyn\_5ul\_E4\_01\_583

29058

TOF; CID

86.18

572.33

BOK

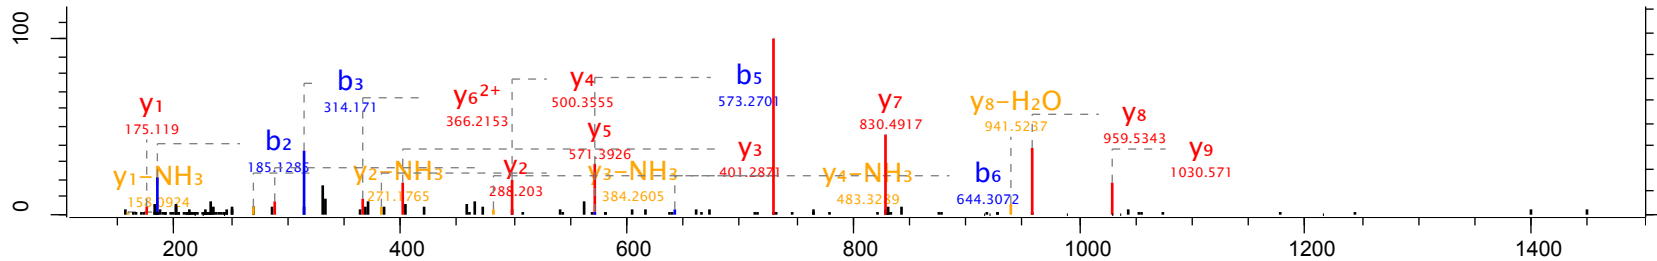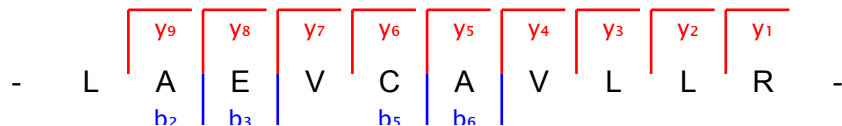

Raw file

20141014\_fract4\_dyn\_5ul\_E4\_01\_583

Scan

29096

Method

TOF; CID

Score

99.09

m/z

735.03

Gene names

UBALD1

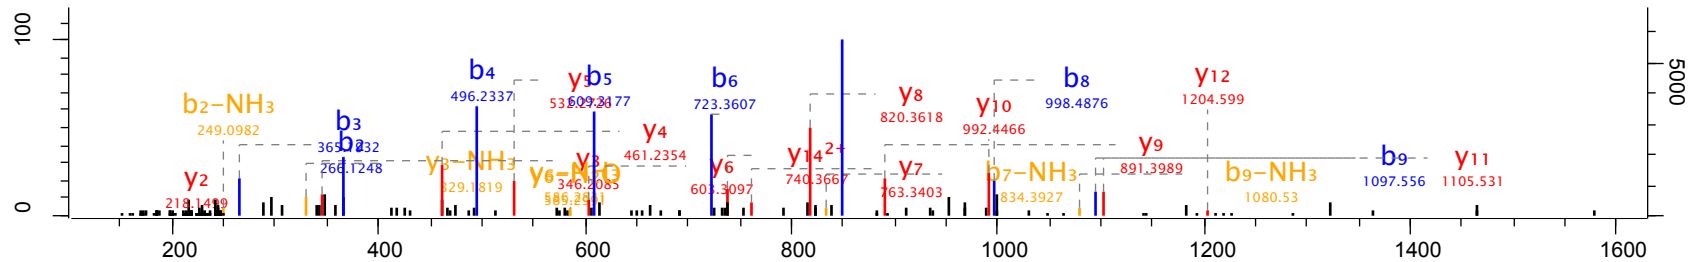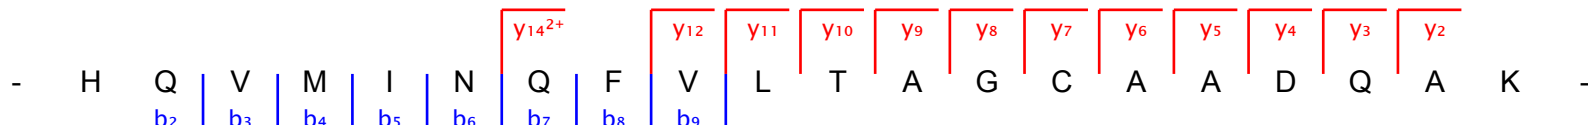

| Raw file                          | Scan  | Method   | Score  | m/z    | Gene names |
|-----------------------------------|-------|----------|--------|--------|------------|
| 20141014_fract4_dyn_5ul_E4_01_583 | 29929 | TOF; CID | 103.43 | 623.86 | SLC22A18   |

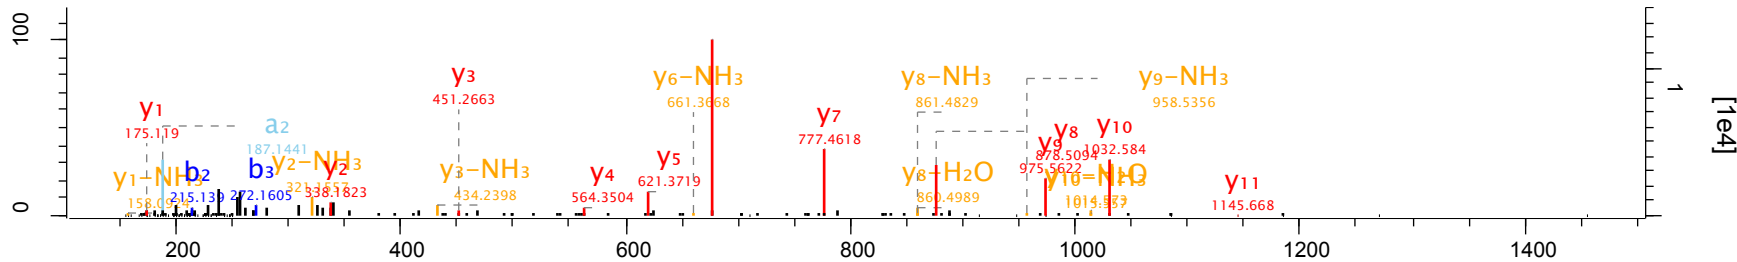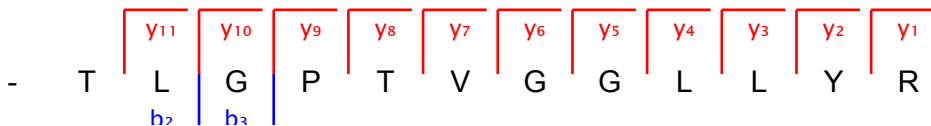

Raw file

20141014\_fract4\_dyn\_5ul\_E4\_01\_583

Scan

30589

Method

TOF; CID

Score

53.56

m/z

668.31

Gene names

PERP

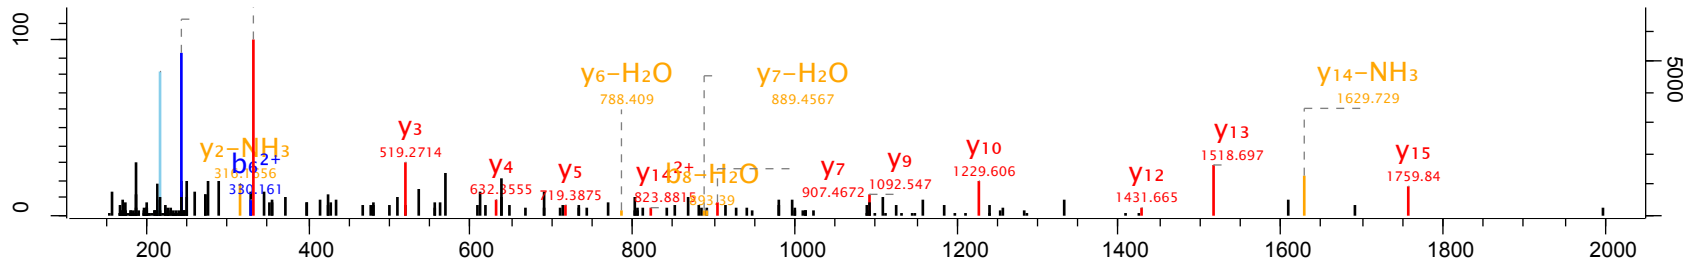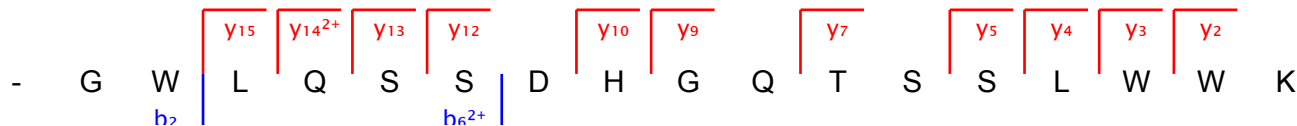



Raw file

20141014\_fract4\_dyn\_5ul\_E4\_01\_583

Scan

32830

Method

TOF; CID

Score

146.37

m/z

854.41

Gene names

SSR3

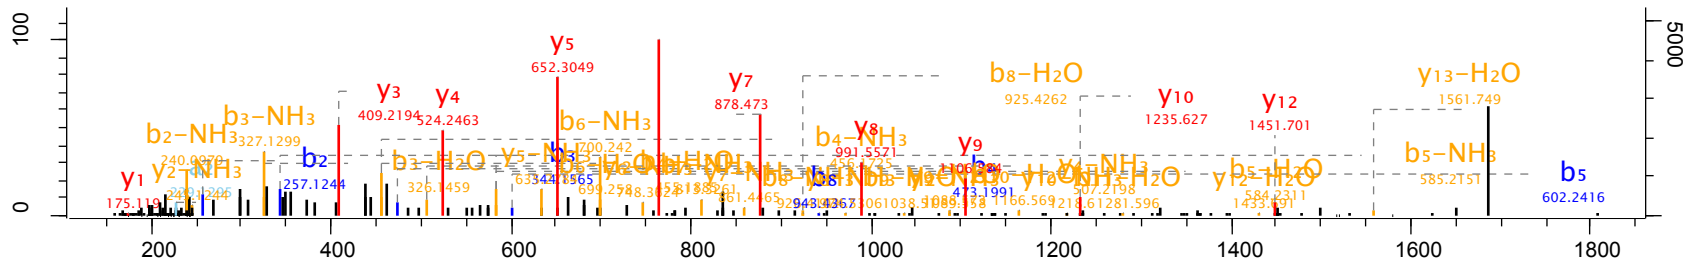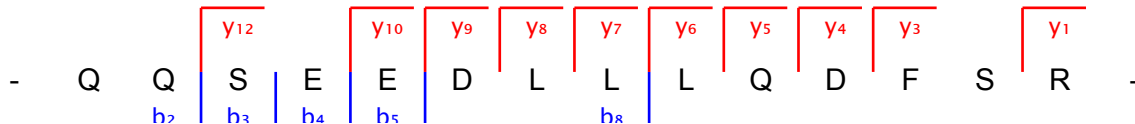

| Raw file                          | Scan  | Method   | Score | m/z    | Gene names |
|-----------------------------------|-------|----------|-------|--------|------------|
| 20141014_fract4_dyn_5ul_E4_01_583 | 33651 | TOF; CID | 51.73 | 659.36 | CDC14B     |

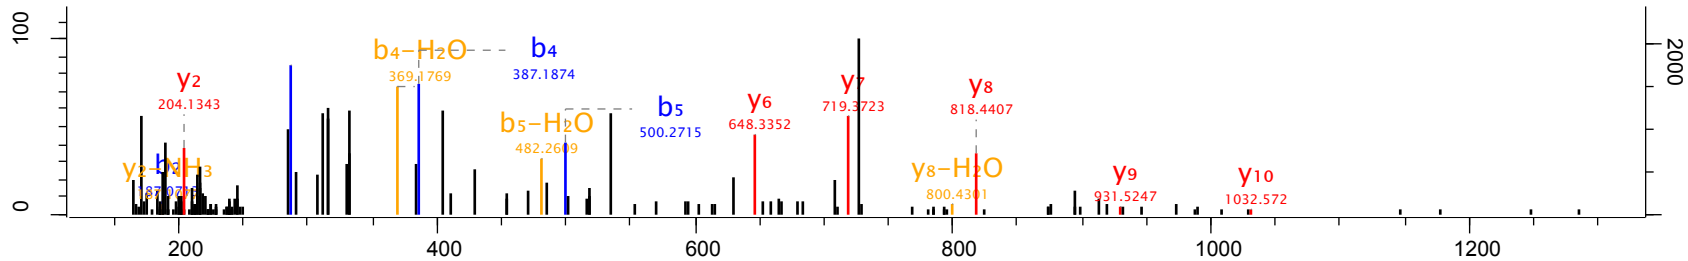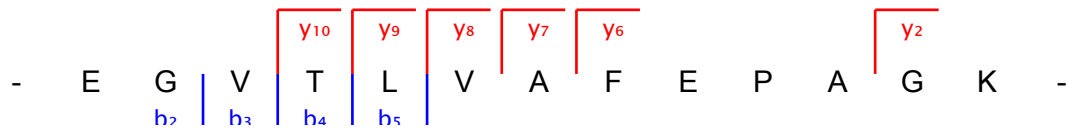

Raw file

20141014\_fract4\_dyn\_5ul\_E4\_01\_583

Scan

34503

Method

TOF; CID

Score

77.66

m/z

568.8

Gene names

MT-ND2

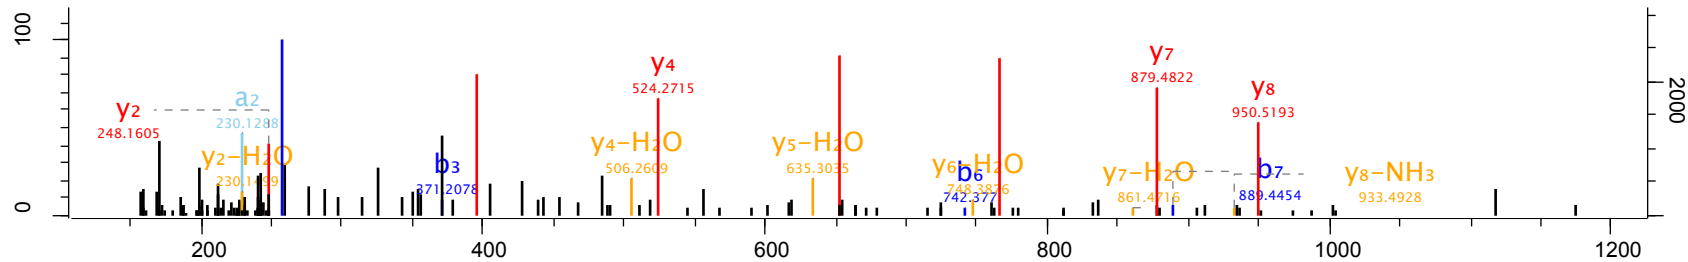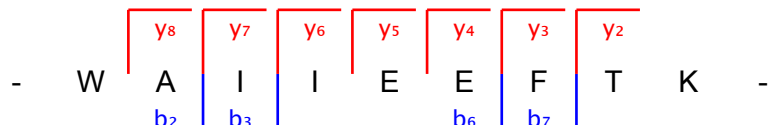

Raw file

20141014\_fract4\_dyn\_5ul\_E4\_01\_583

Scan

38279

Method

TOF; CID

Score

59.25

m/z

953.5

Gene names

C4orf46

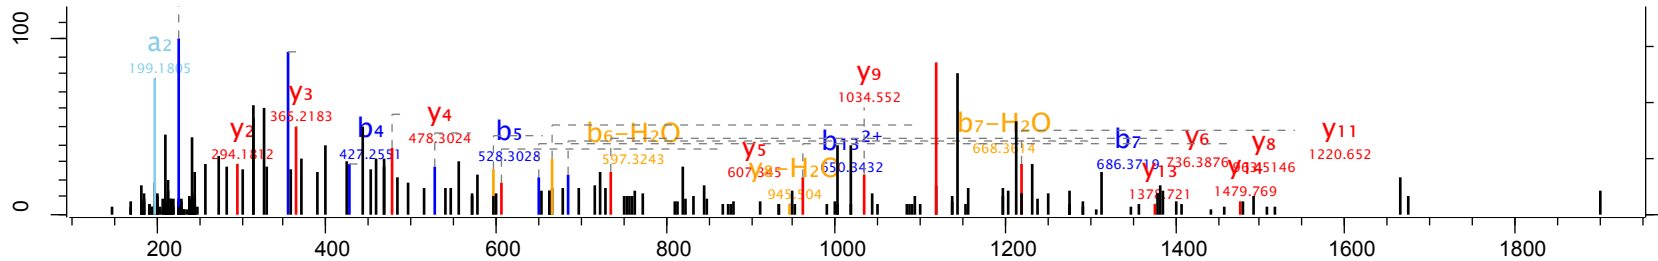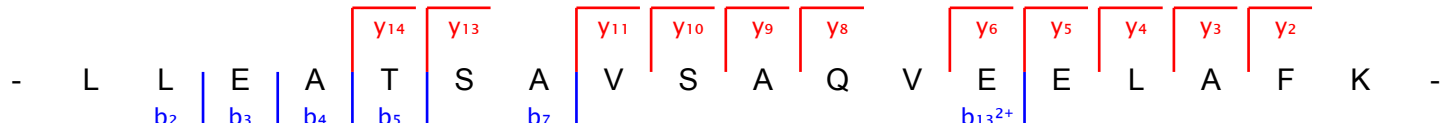

Raw file

20141014\_fract4\_dyn\_5ul\_E4\_01\_583

Scan

38846

Method

TOF; CID

Score

73.93

m/z

754.9

Gene names

BARX1

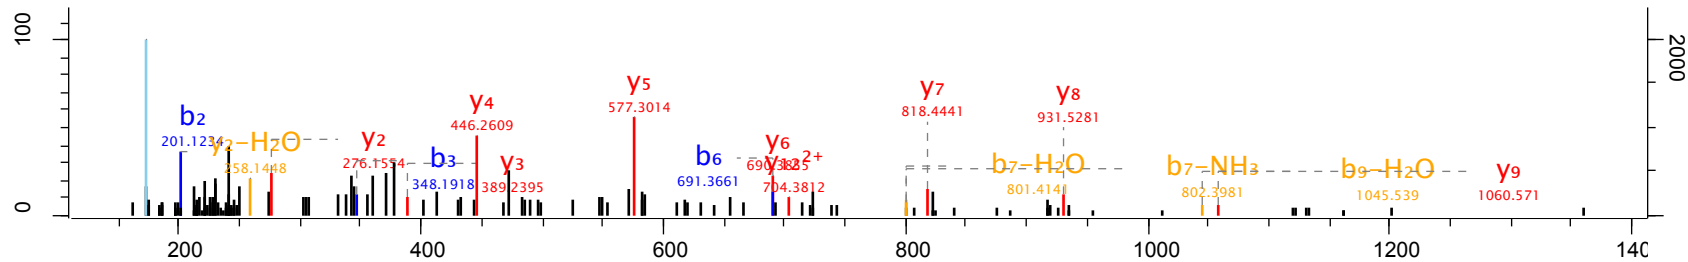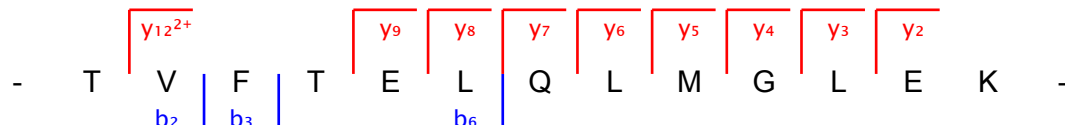

| Raw file                          | Scan | Method   | Score  | m/z    | Gene names |
|-----------------------------------|------|----------|--------|--------|------------|
| 20141014_fract5_dyn_5ul_E5_01_584 | 7476 | TOF; CID | 139.28 | 429.24 | VAMP5      |

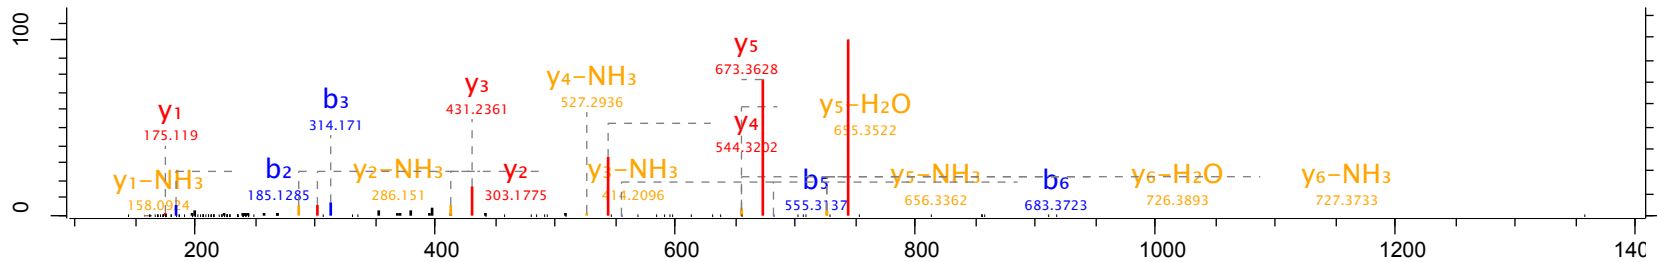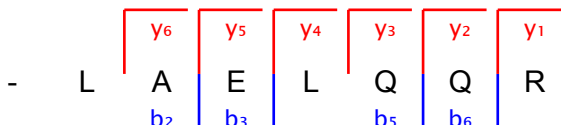

[1e4]

| Raw file                          | Scan | Method   | Score  | m/z    | Gene names |
|-----------------------------------|------|----------|--------|--------|------------|
| 20141014_fract5_dyn_5ul_E5_01_584 | 9936 | TOF; CID | 134.66 | 432.73 | TSPAN3     |

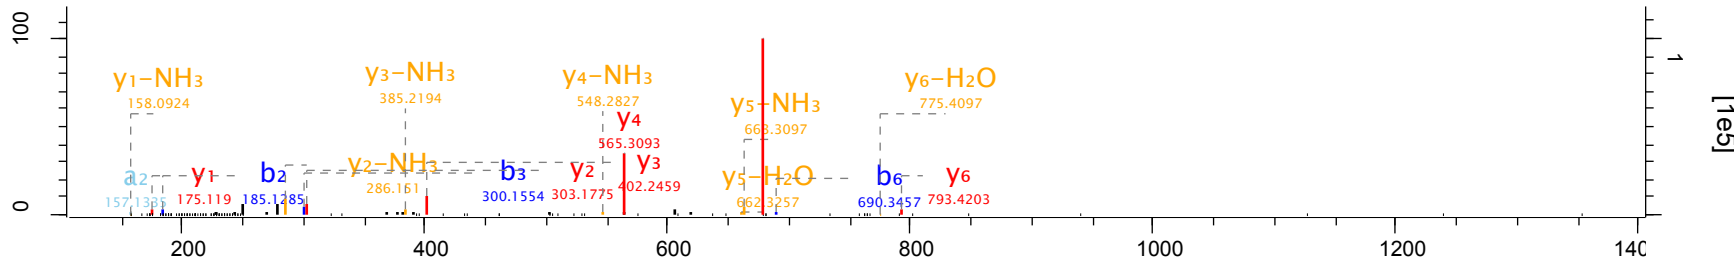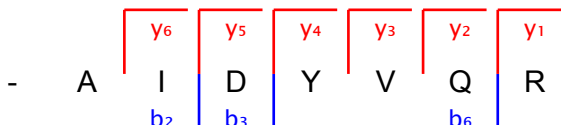

Raw file

20141014\_fract5\_dyn\_5ul\_E5\_01\_584

Scan

12423

Method

TOF; CID

Score

135.1

m/z

640.8

Gene names

C17orf89

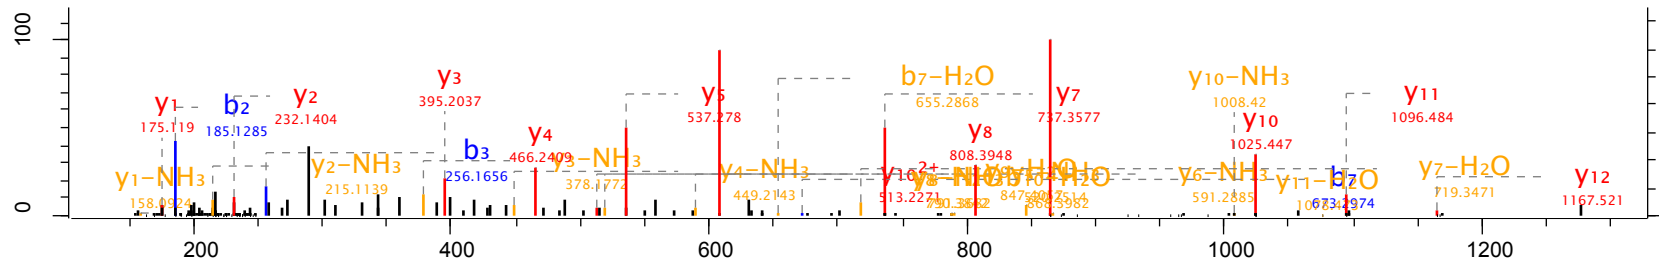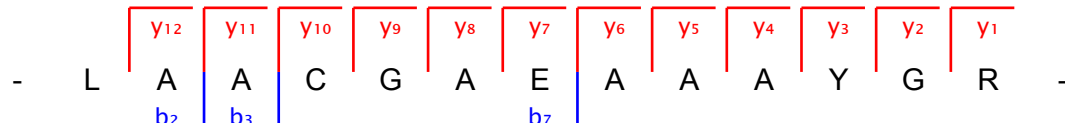



| Raw file                          | Scan  | Method   | Score | m/z    | Gene names |
|-----------------------------------|-------|----------|-------|--------|------------|
| 20141014_fract5_dyn_5ul_E5_01_584 | 12753 | TOF; CID | 66.99 | 654.82 | MORC4      |

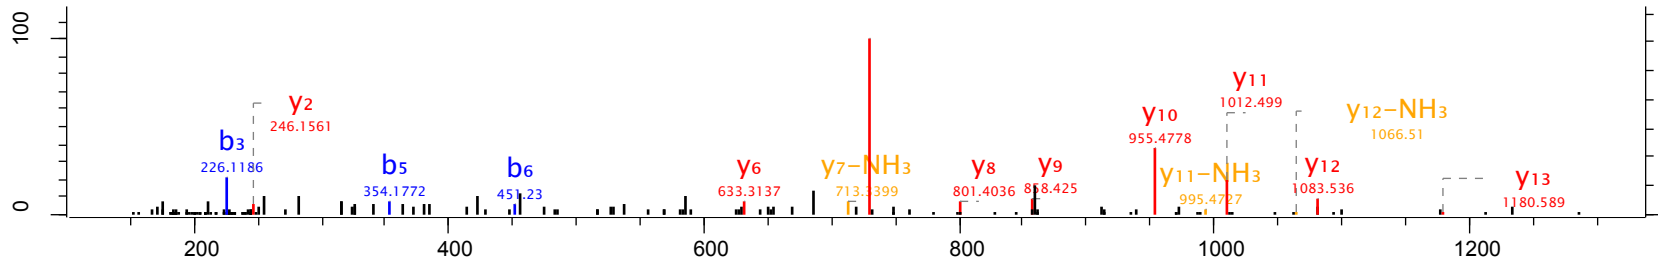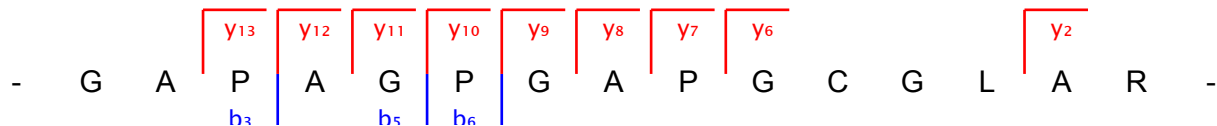

| Raw file                          | Scan  | Method   | Score | m/z    | Gene names |
|-----------------------------------|-------|----------|-------|--------|------------|
| 20141014_fract5_dyn_5ul_E5_01_584 | 13734 | TOF; CID | 48.61 | 511.28 | IFI27L2    |

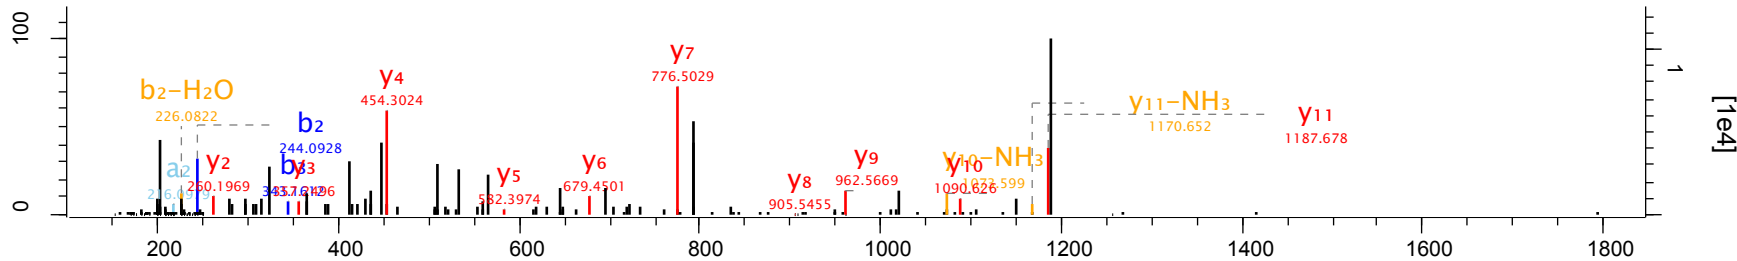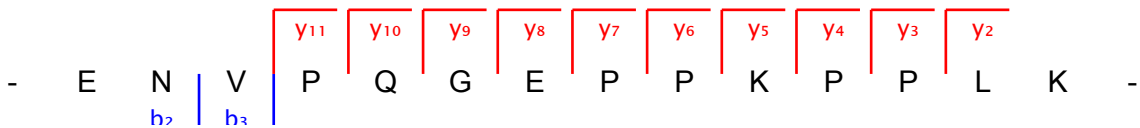

| Raw file                          | Scan  | Method   | Score | m/z    | Gene names |
|-----------------------------------|-------|----------|-------|--------|------------|
| 20141014_fract5_dyn_5ul_E5_01_584 | 15192 | TOF; CID | 63.29 | 698.84 | ADIRF      |

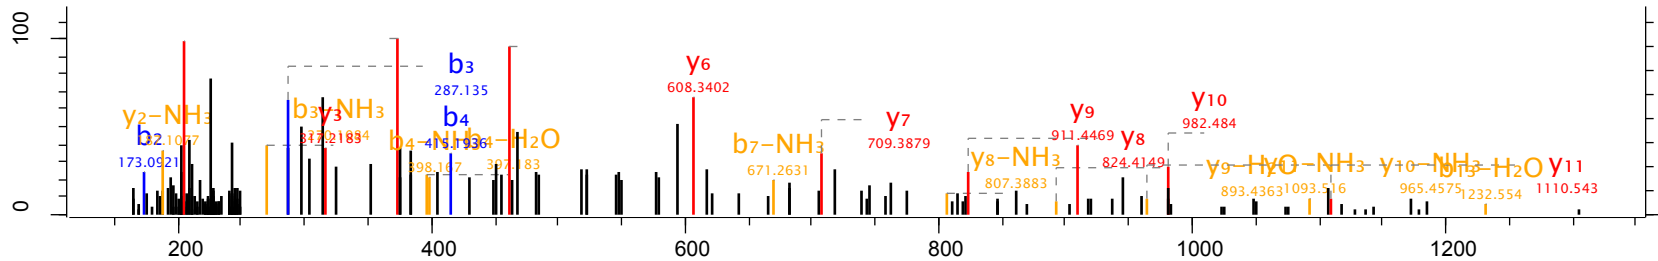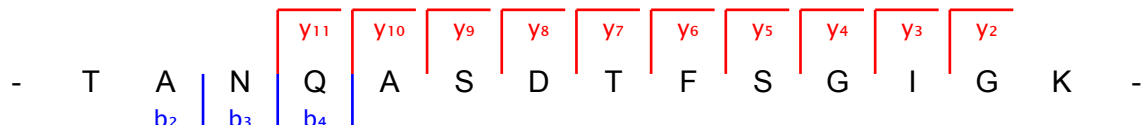

Raw file

20141014\_fract5\_dyn\_5ul\_E5\_01\_584

Scan

21272

Method

TOF; CID

Score

143

m/z

451.25

Gene names

BTBD16

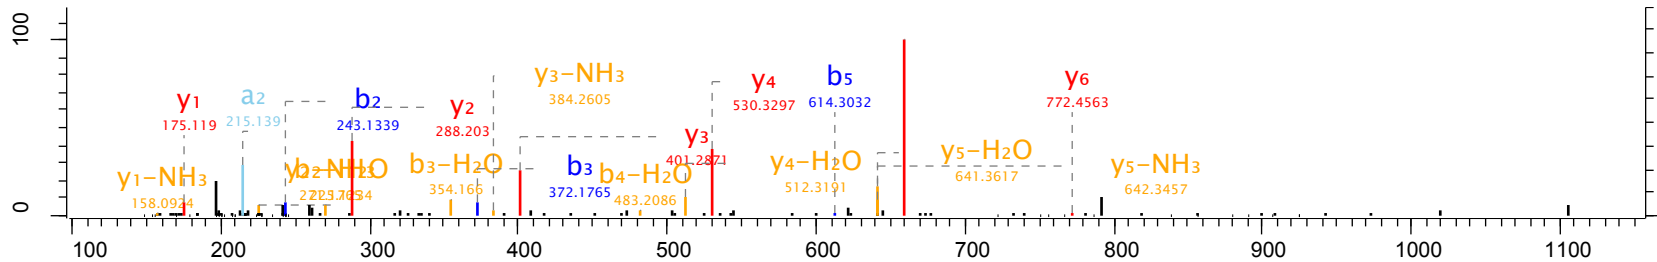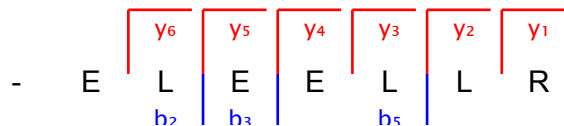

| Raw file                          | Scan  | Method   | Score | m/z    | Gene names |
|-----------------------------------|-------|----------|-------|--------|------------|
| 20141014_fract5_dyn_5ul_E5_01_584 | 23325 | TOF; CID | 72.34 | 648.29 | PFDN4      |

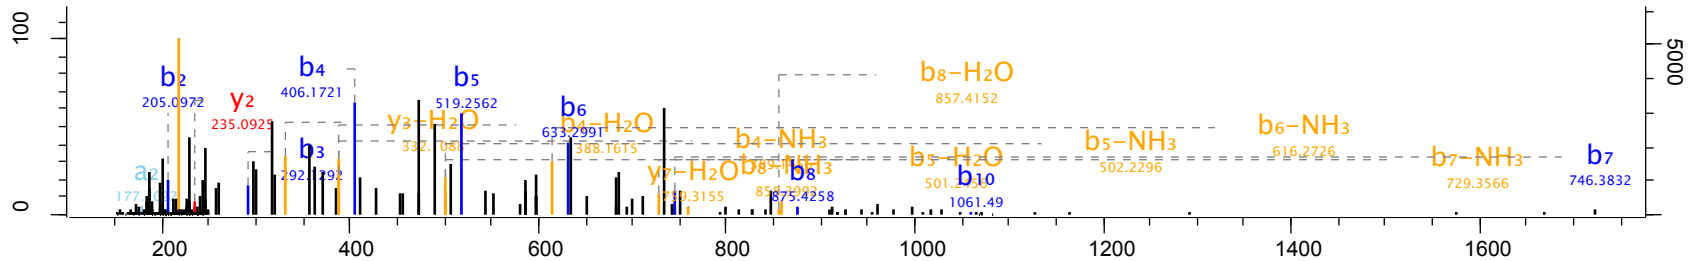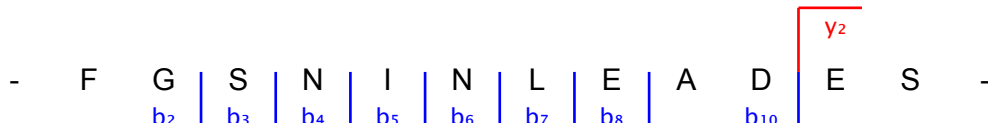

| Raw file                          | Scan  | Method   | Score | m/z    | Gene names |
|-----------------------------------|-------|----------|-------|--------|------------|
| 20141014_fract5_dyn_5ul_E5_01_584 | 23615 | TOF; CID | 97.27 | 793.89 | PMAIP1     |

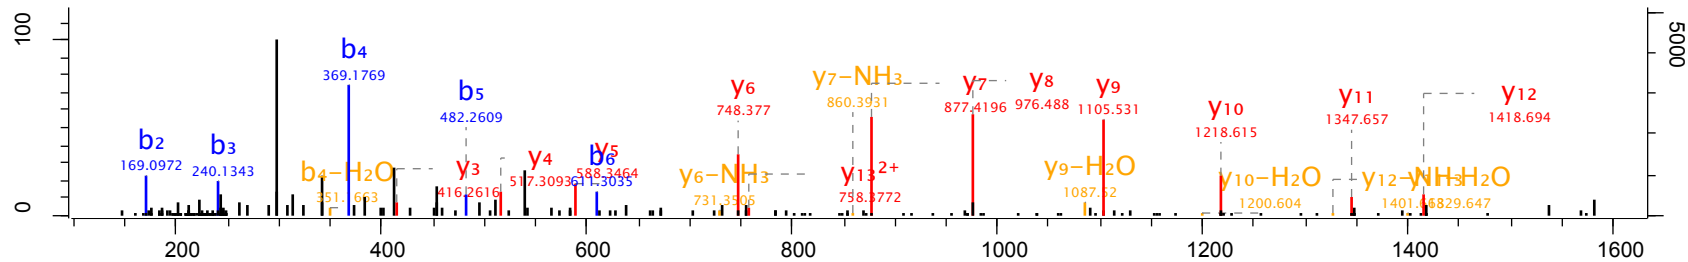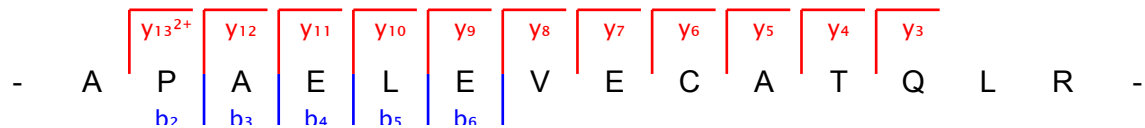

| Raw file                          | Scan  | Method   | Score  | m/z    | Gene names |
|-----------------------------------|-------|----------|--------|--------|------------|
| 20141014_fract5_dyn_5ul_E5_01_584 | 27722 | TOF; CID | 148.28 | 412.22 | SMDT1      |

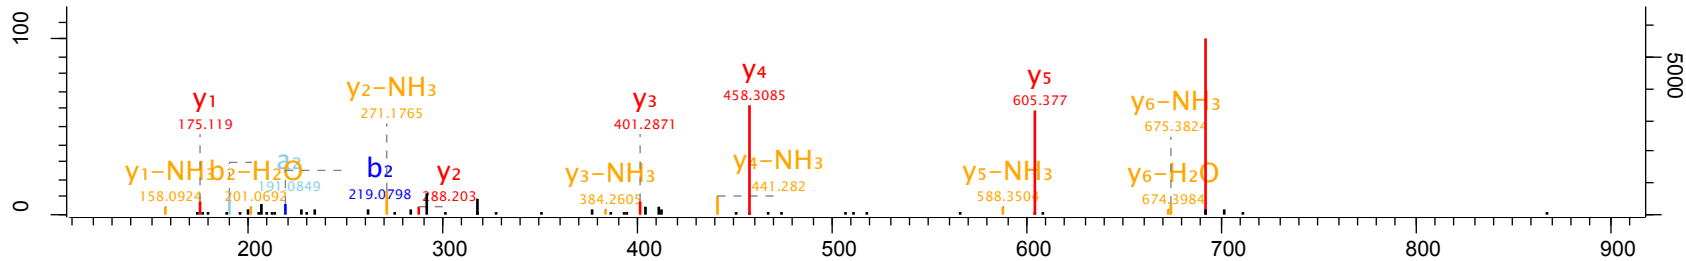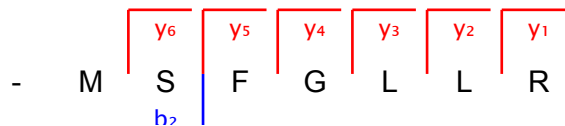

| Raw file                          | Scan  | Method   | Score  | m/z    | Gene names |
|-----------------------------------|-------|----------|--------|--------|------------|
| 20141014_fract5_dyn_5ul_E5_01_584 | 28067 | TOF; CID | 143.28 | 504.72 | TMEM258    |

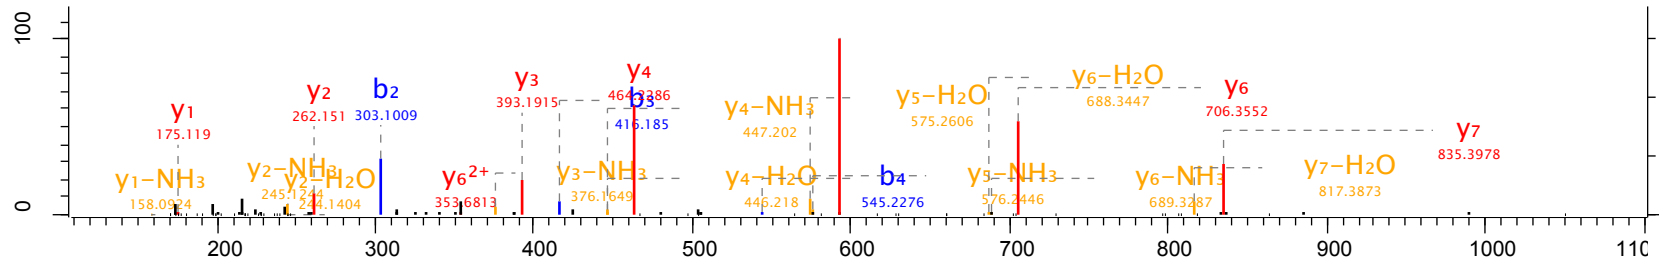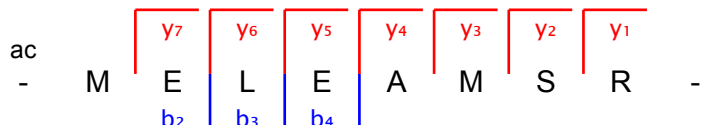



Raw file

20141014\_fract5\_dyn\_5ul\_E5\_01\_584

Scan

30004

Method

TOF; CID

Score

106.04

m/z

581.32

Gene names

ZDHHC12

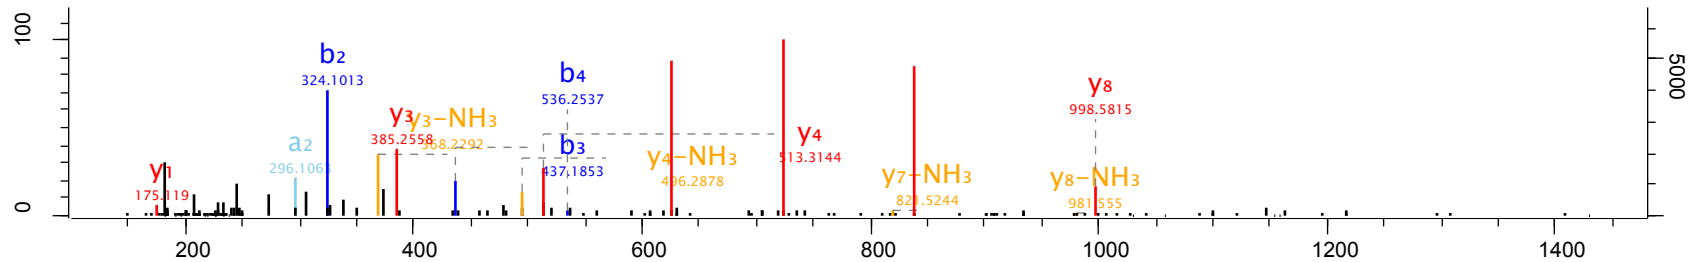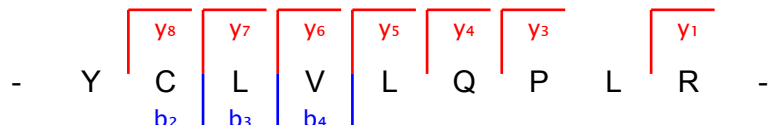

Raw file

Scan

Method

Score

m/z

Gene names

20141014\_fract5\_dyn\_5ul\_E5\_01\_584

31391

TOF; CID

61.94

725.35

PRR3

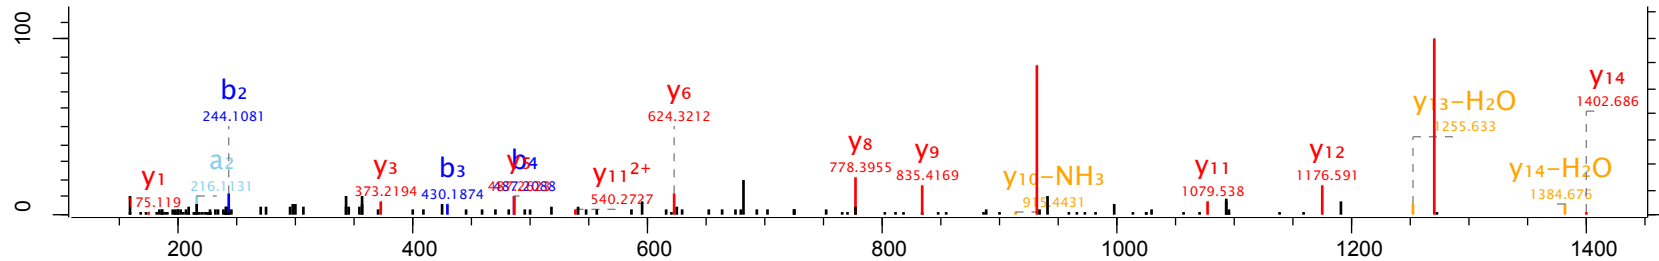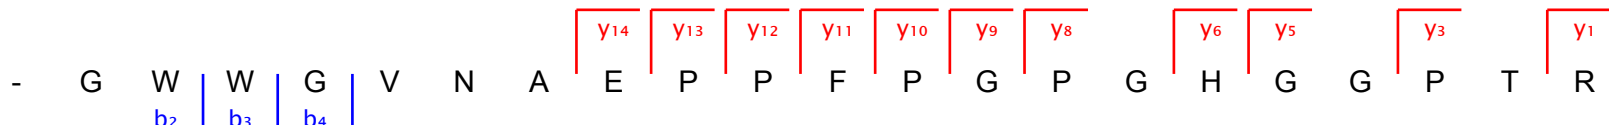

Raw file

20141014\_fract5\_dyn\_5ul\_E5\_01\_584

Scan

32361

Method

TOF; CID

Score

72.33

m/z

522.8

Gene names

ABCG8

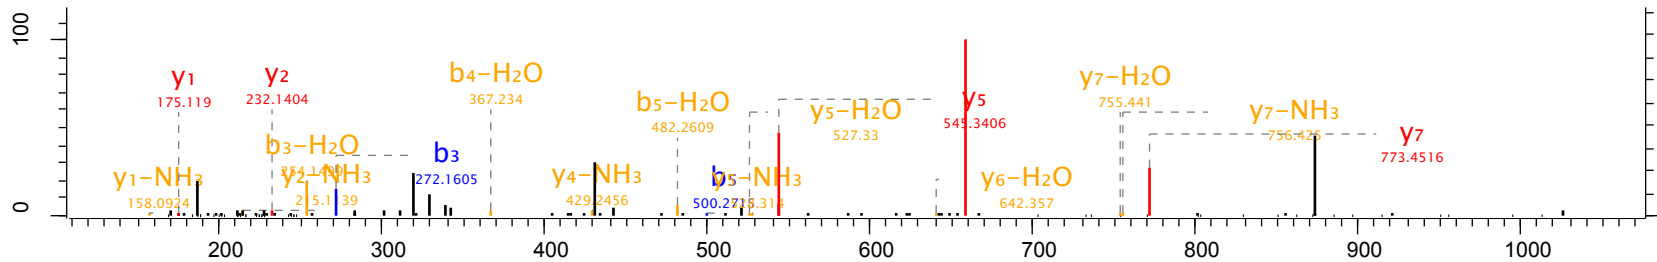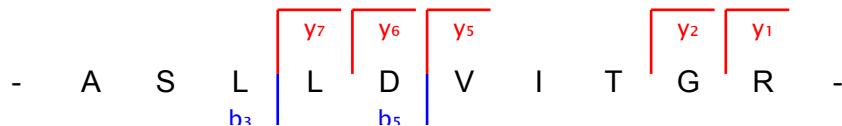

Raw file

20141014\_fract5\_dyn\_5ul\_E5\_01\_584

Scan

33982

Method

TOF; CID

Score

90.05

m/z

577.35

Gene names

SPIN4

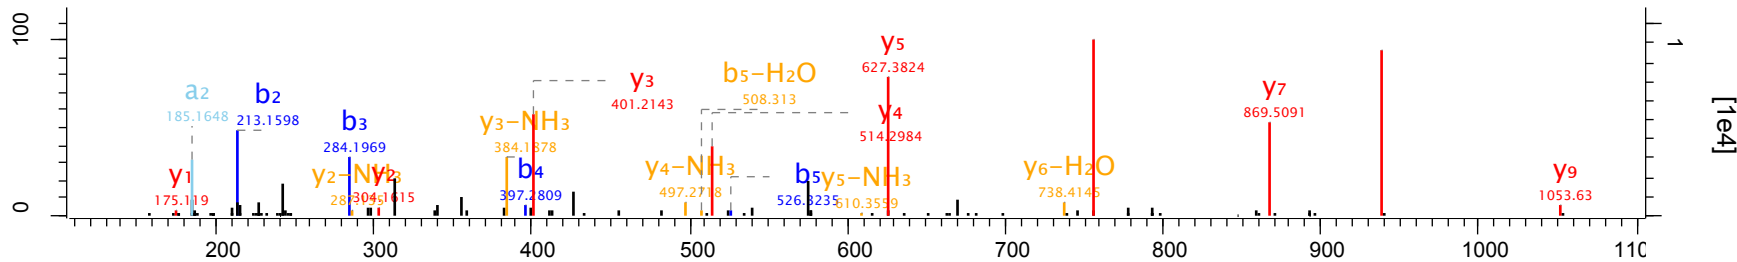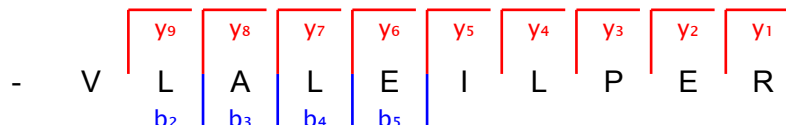

| Raw file                          | Scan  | Method   | Score | m/z    | Gene names |
|-----------------------------------|-------|----------|-------|--------|------------|
| 20141014_fract5_dyn_5ul_E5_01_584 | 34491 | TOF; CID | 59.73 | 650.32 | RNF141     |

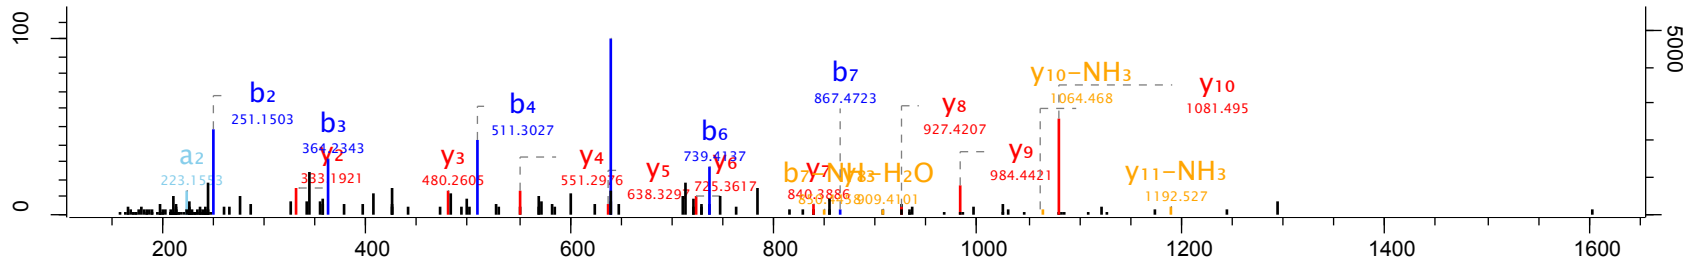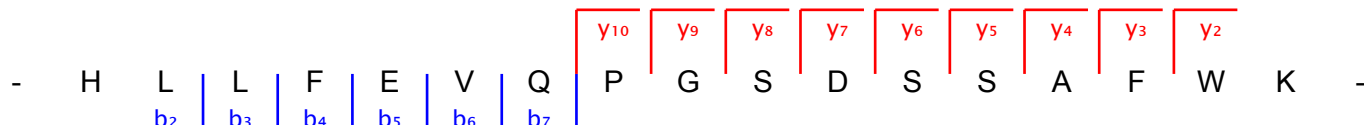

Raw file

20141014\_fract5\_dyn\_5ul\_E5\_01\_584

Scan

34718

Method

TOF; CID

Score

35.54

m/z

860.41

Gene names

ADPRM

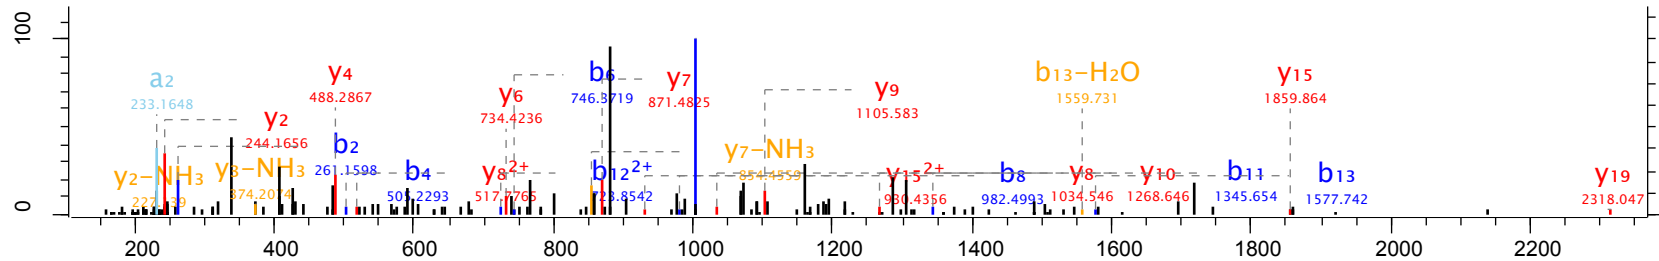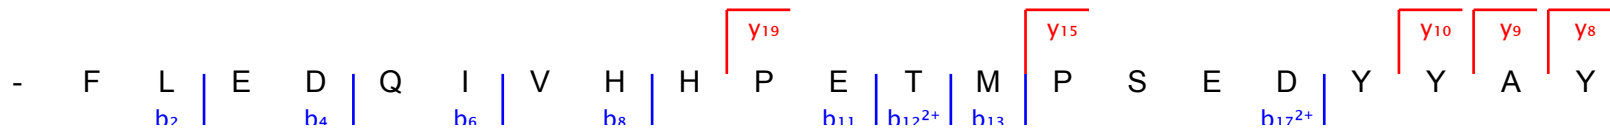

Raw file

20141014\_fract5\_dyn\_5ul\_E5\_01\_584

Scan

36099

Method

TOF; CID

Score

80.75

m/z

500.31

Gene names

IFI44

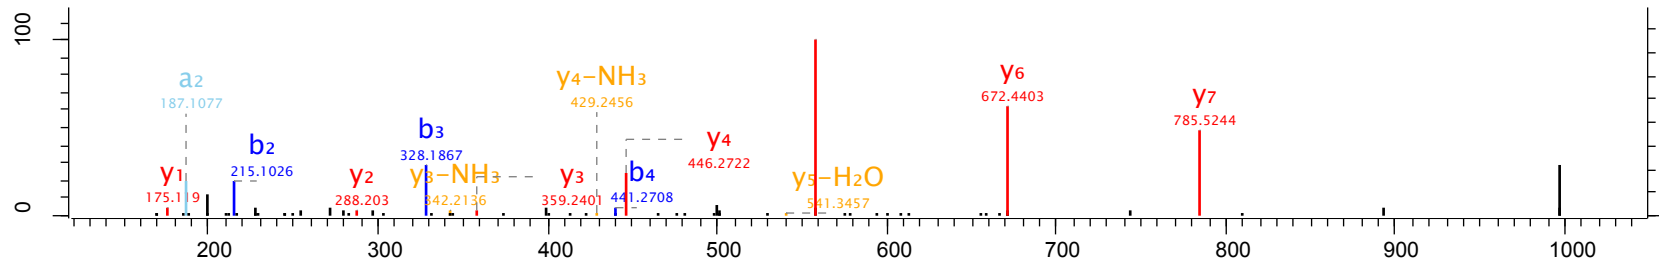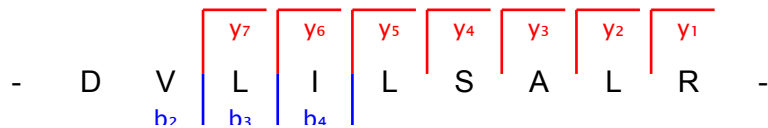

| Raw file                          | Scan  | Method   | Score | m/z   | Gene names |
|-----------------------------------|-------|----------|-------|-------|------------|
| 20141014_fract5_dyn_5ul_E5_01_584 | 36548 | TOF; CID | 90.41 | 750.9 | TMEM128    |

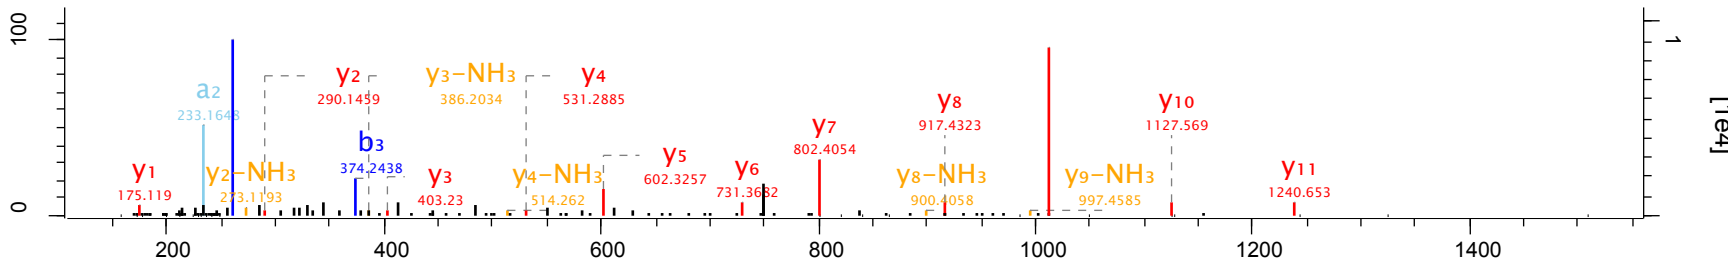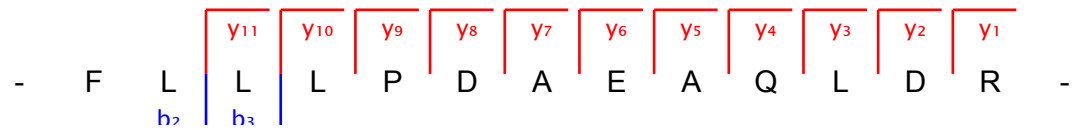



Raw file

20141014\_fract6\_dyn\_5ul\_E6\_01\_585

Scan

4782

Method

TOF; CID

Score

52.39

m/z

449.22

Gene names

ZNF526

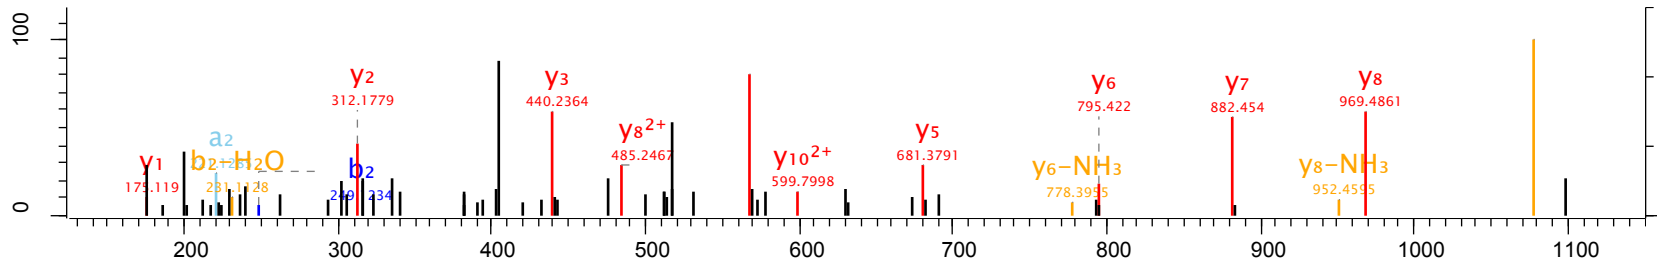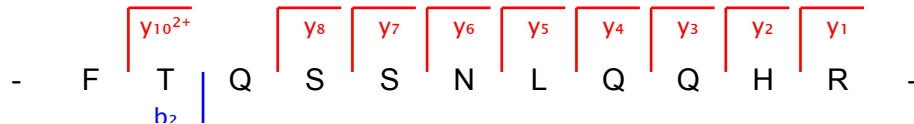

Raw file

20141014\_fract6\_dyn\_5ul\_E6\_01\_585

Scan

5304

Method

TOF; CID

Score

71.88

m/z

497.59

Gene names

ZNF689

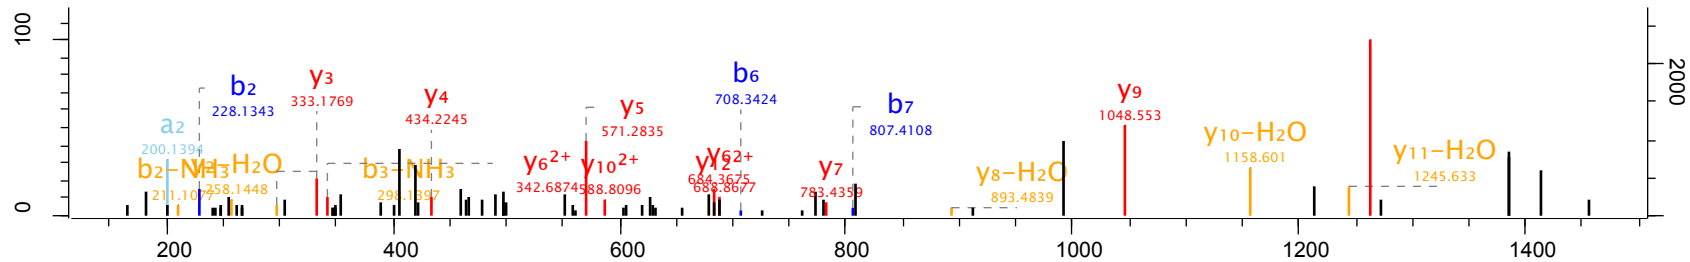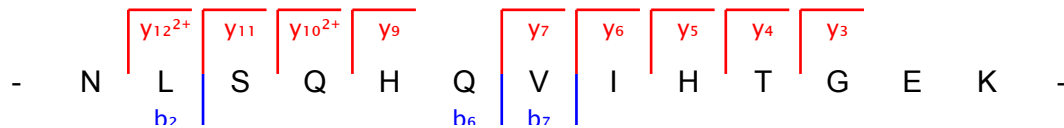

Raw file

20141014\_fract6\_dyn\_5ul\_E6\_01\_585

Scan

5558

Method

TOF; CID

Score

84.17

m/z

464.21

Gene names

ZSCAN29

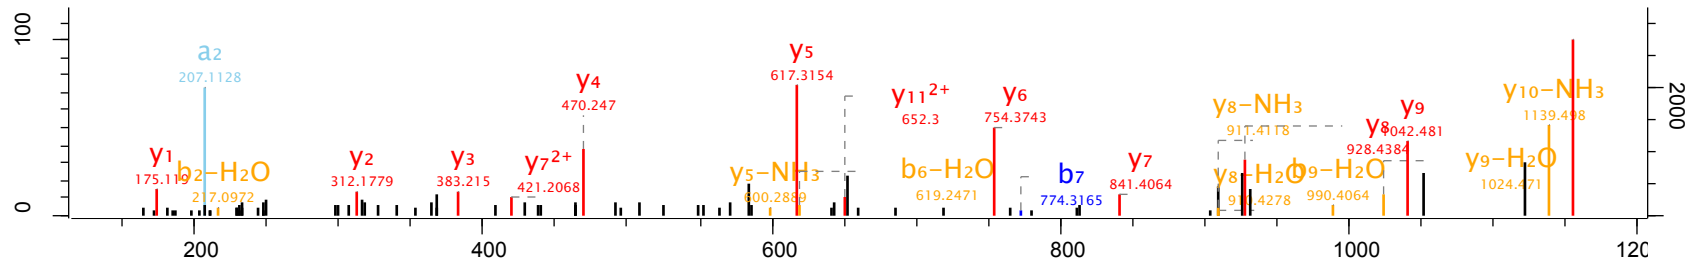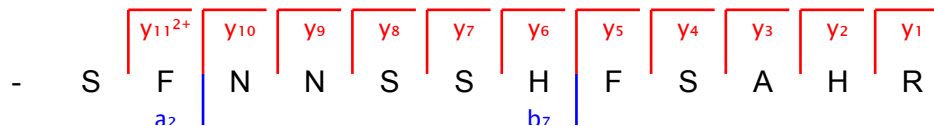

| Raw file                          | Scan | Method   | Score  | m/z    | Gene names |
|-----------------------------------|------|----------|--------|--------|------------|
| 20141014_fract6_dyn_5ul_E6_01_585 | 9632 | TOF; CID | 111.01 | 476.27 | ZNF584     |

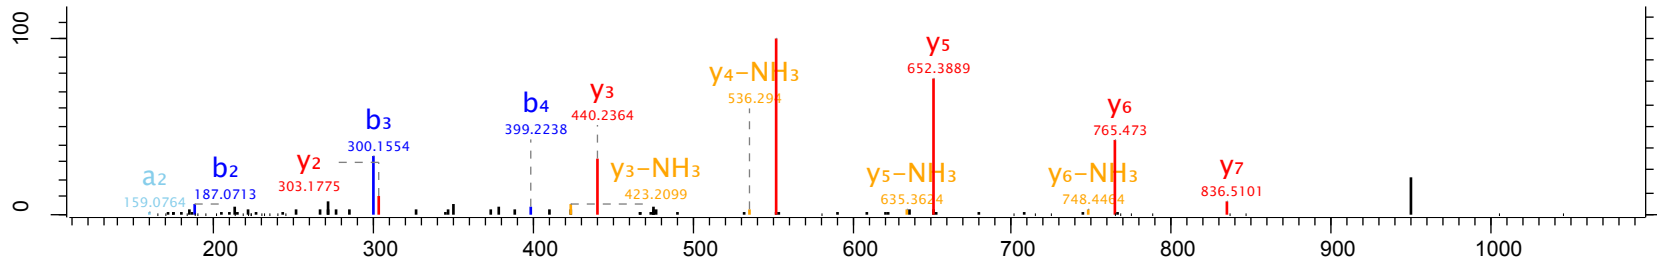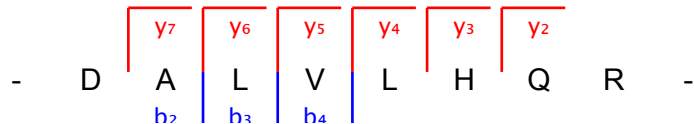

Raw file

20141014\_fract6\_dyn\_5ul\_E6\_01\_585

Scan

9932

Method

TOF; CID

Score

113.99

m/z

617.32

Gene names

HDGFRP2

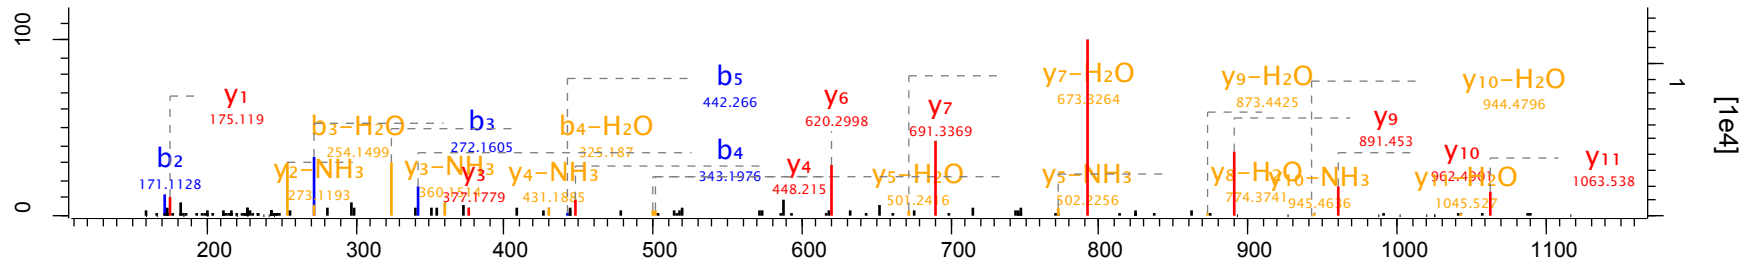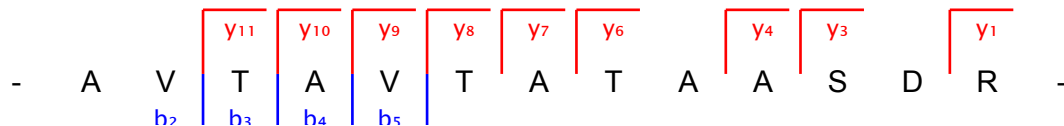

Raw file

20141014\_fract6\_dyn\_5ul\_E6\_01\_585

Scan

11959

Method

TOF; CID

Score

62.86

m/z

592.66

Gene names

C20orf24

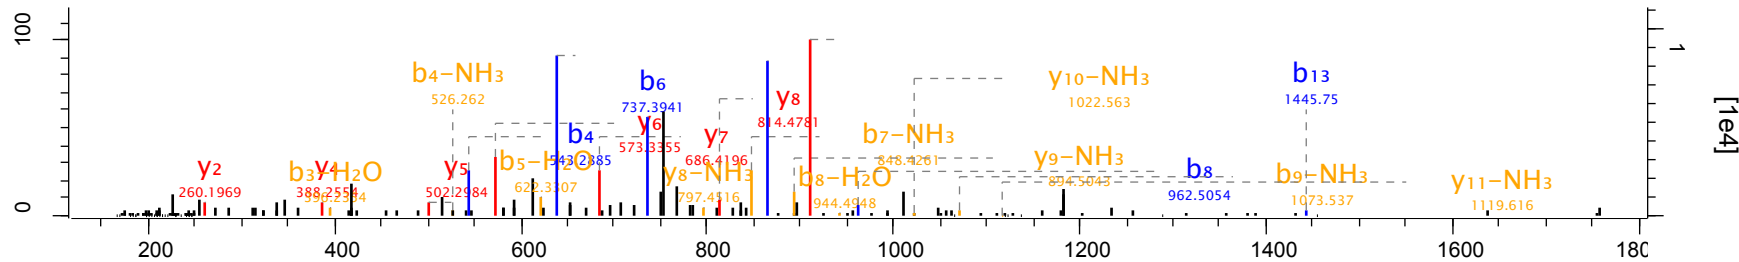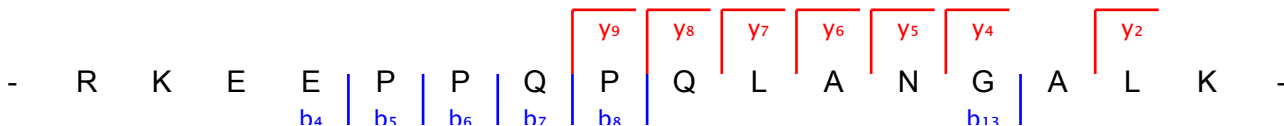

Raw file

Scan

Method

Score

m/z

Gene names

20141014\_fract6\_dyn\_5ul\_E6\_01\_585

12811

TOF; CID

96.74

607.83

SLC25A14

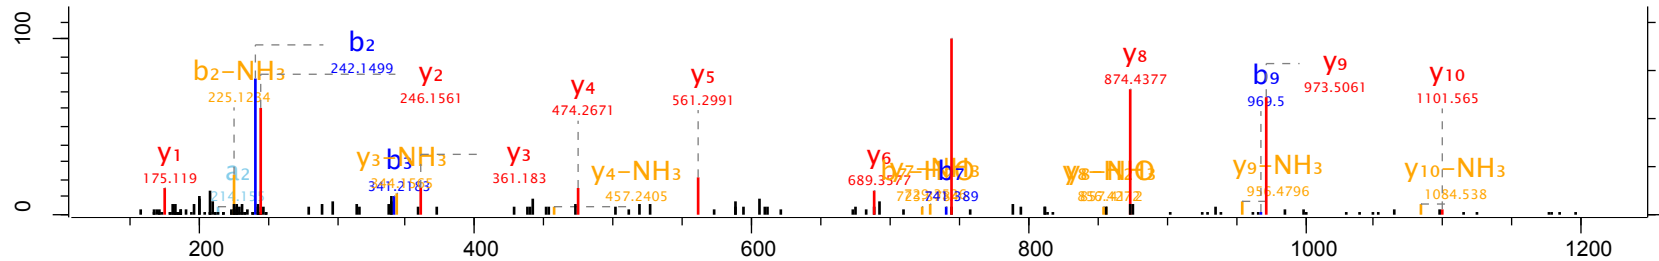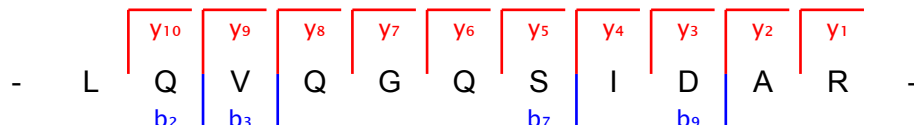

| Raw file                          | Scan  | Method   | Score  | m/z    | Gene names |
|-----------------------------------|-------|----------|--------|--------|------------|
| 20141014_fract6_dyn_5ul_E6_01_585 | 13708 | TOF; CID | 123.79 | 638.29 | CKS1B      |

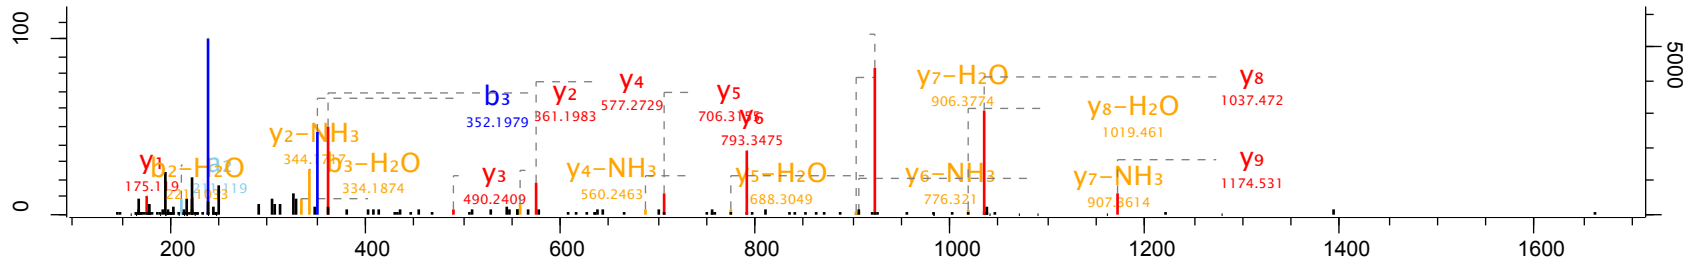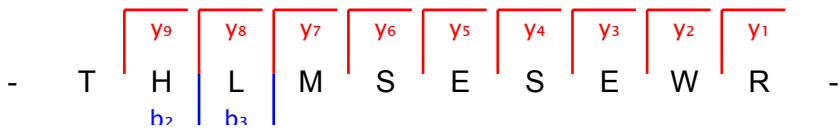



Raw file

20141014\_fract6\_dyn\_5ul\_E6\_01\_585

Scan

18036

Method

TOF; CID

Score

77.22

m/z

905.46

Gene names

TMEM44

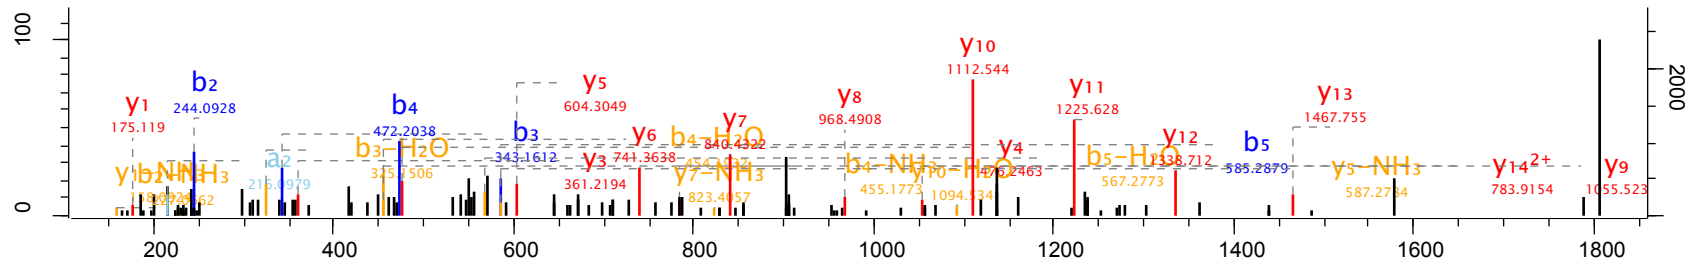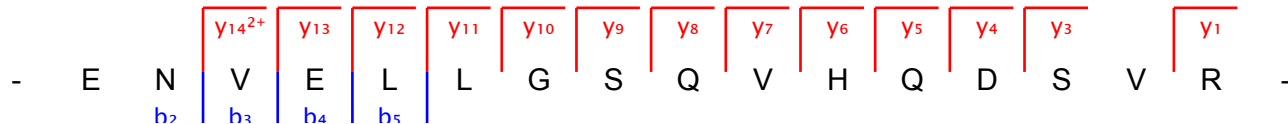

Raw file

20141014\_fract6\_dyn\_5ul\_E6\_01\_585

Scan

26348

Method

TOF; CID

Score

61.96

m/z

802.06

Gene names

CD68

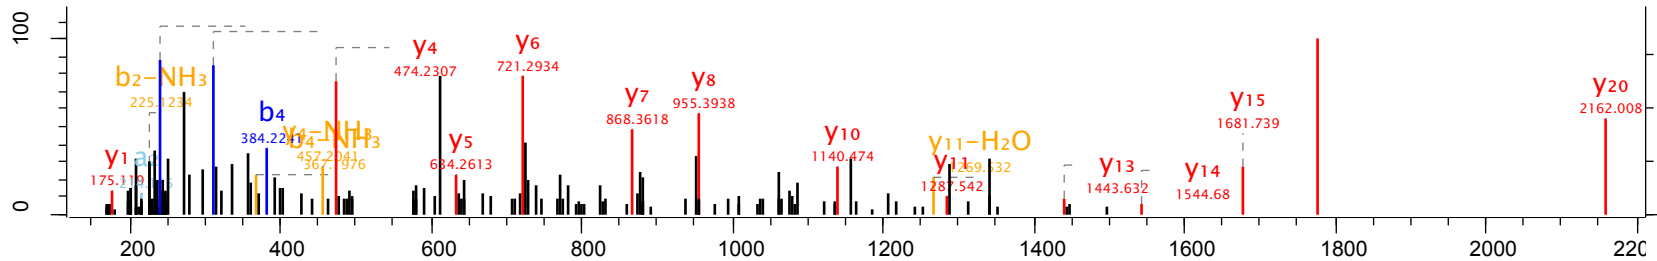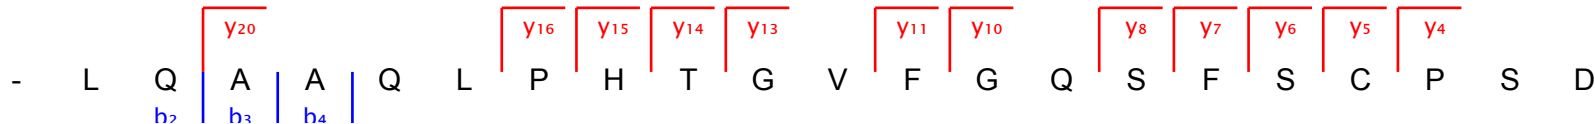

Raw file

20141014\_fract6\_dyn\_5ul\_E6\_01\_585

Scan

33574

Method

TOF; CID

Score

91.24

m/z

874.79

Gene names

ALDH8A1

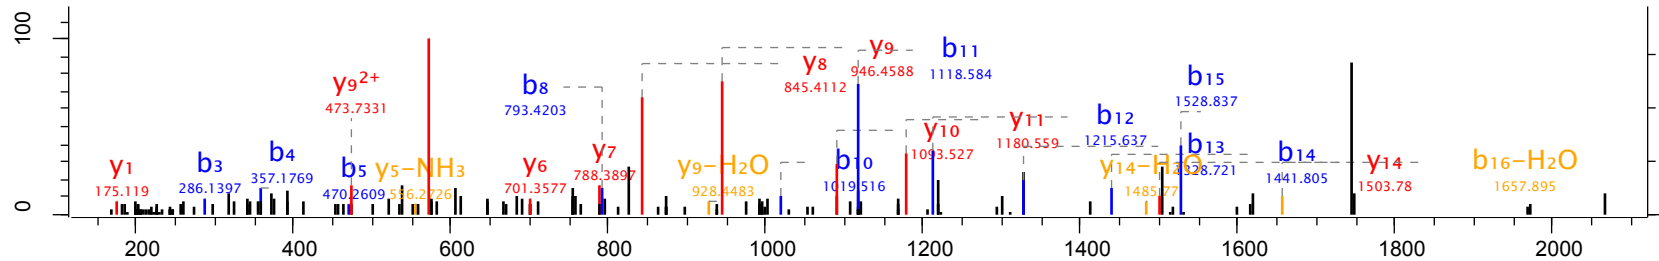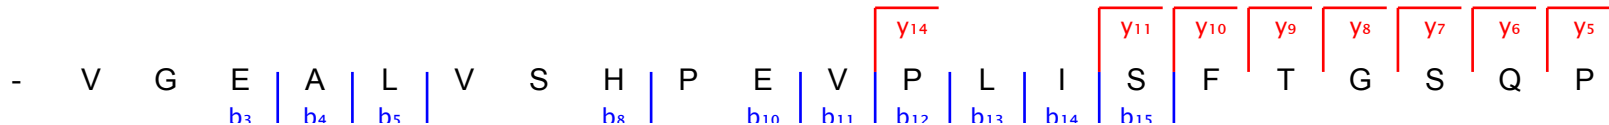

Raw file

20141014\_fract6\_dyn\_5ul\_E6\_01\_585

Scan

33729

Method

TOF; CID

Score

88.6

m/z

739.38

Gene names

PPAPDC1B

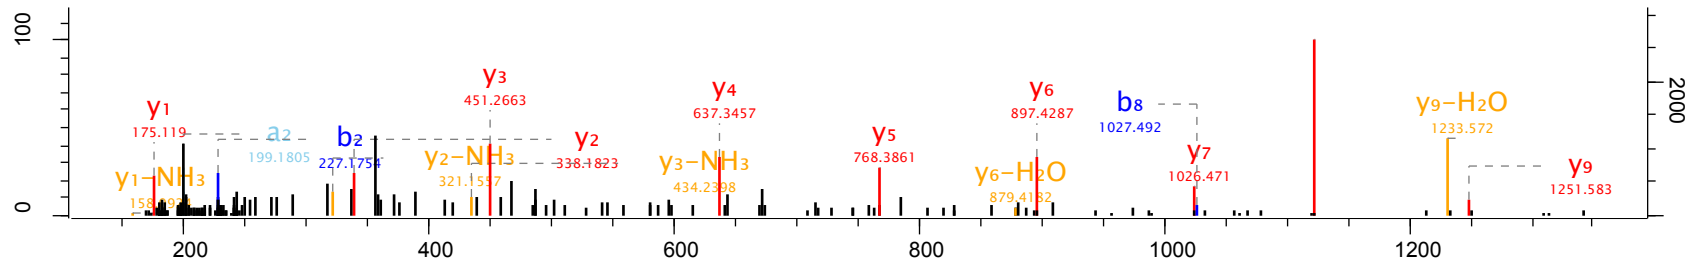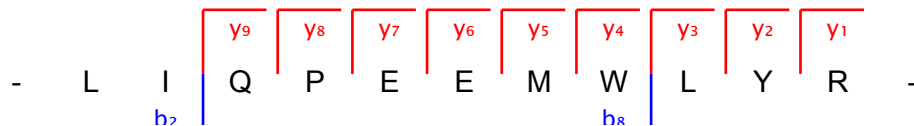

Raw file

20141014\_fract6\_dyn\_5ul\_E6\_01\_585

Scan

34378

Method

TOF; CID

Score

111.01

m/z

996.5

Gene names

PTTG1IP

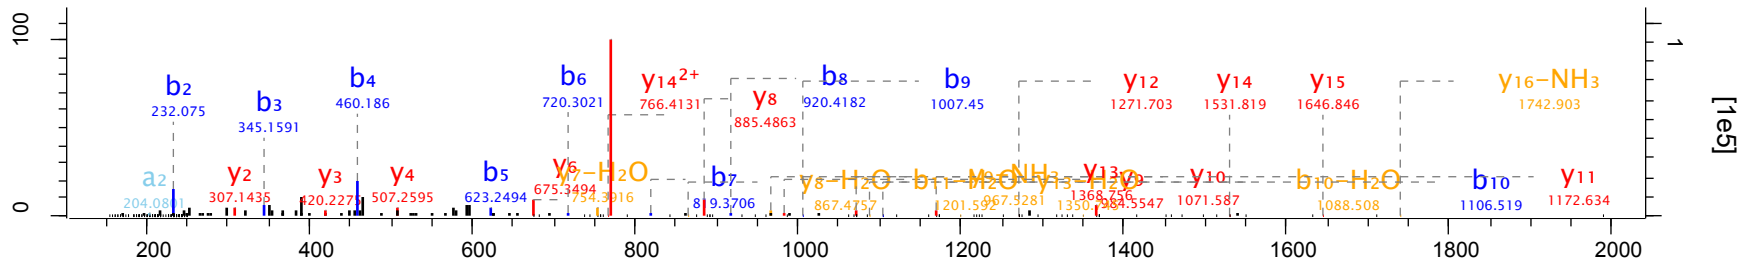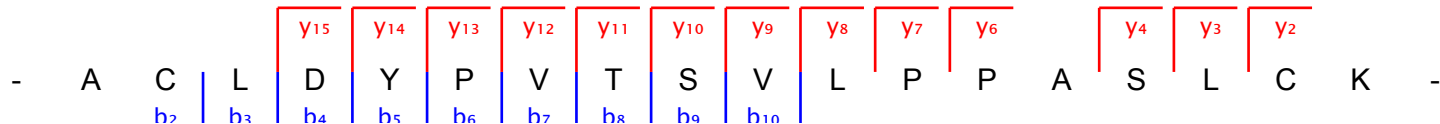

Raw file

20141014\_fract7\_dyn\_5ul\_E7\_01\_586

Scan

4502

Method

TOF; CID

Score

74.48

m/z

481.23

Gene names

ZSCAN21

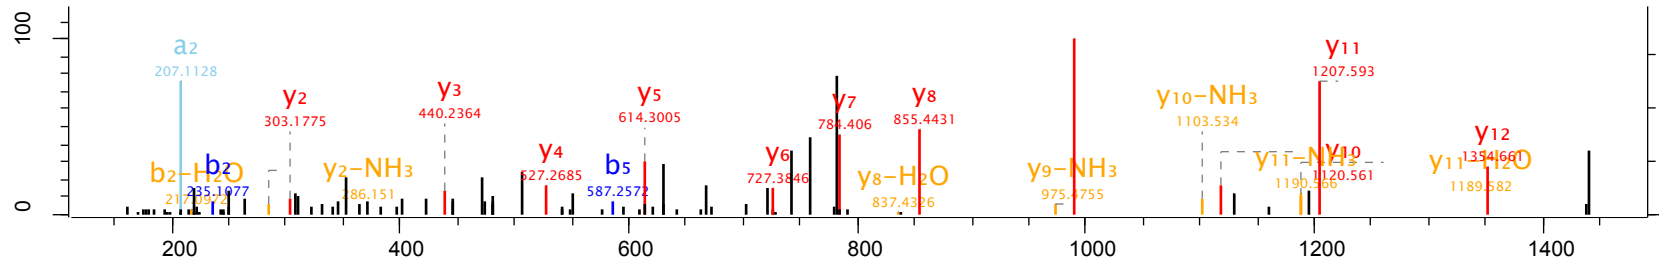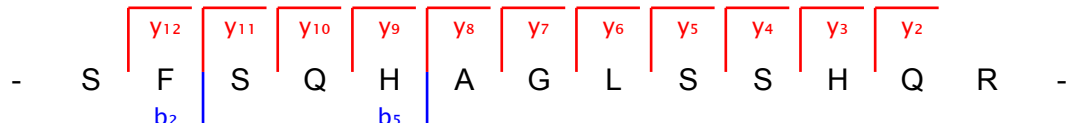

Raw file

20141014\_fract7\_dyn\_5ul\_E7\_01\_586

Scan

4604

Method

TOF; CID

Score

55.72

m/z

506.59

Gene names

STOX2;GDAP1

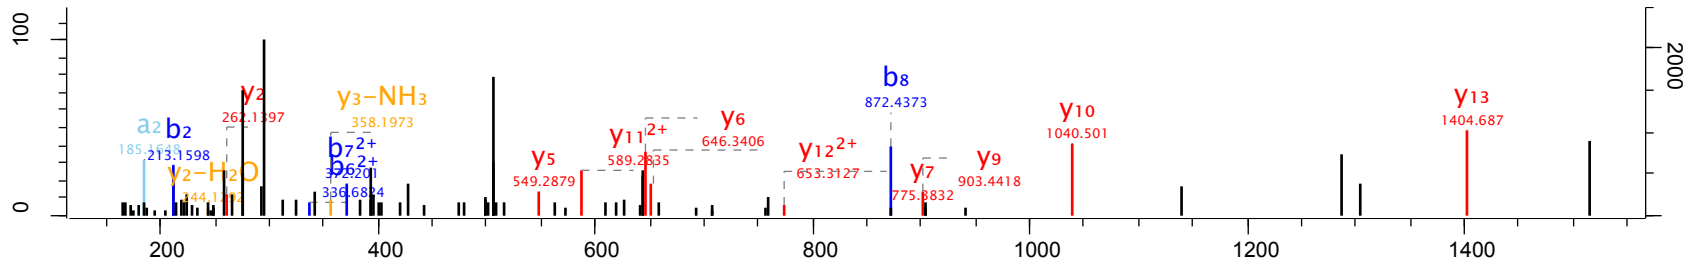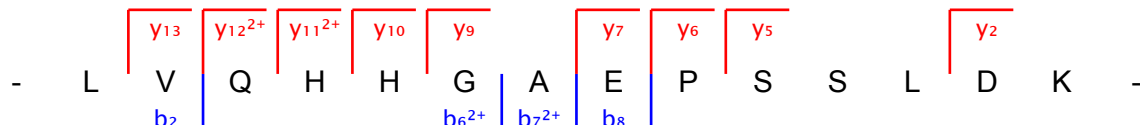

Raw file

20141014\_fract7\_dyn\_5ul\_E7\_01\_586

Scan

7247

Method

TOF; CID

Score

121.86

m/z

629.33

Gene names

CXCR4

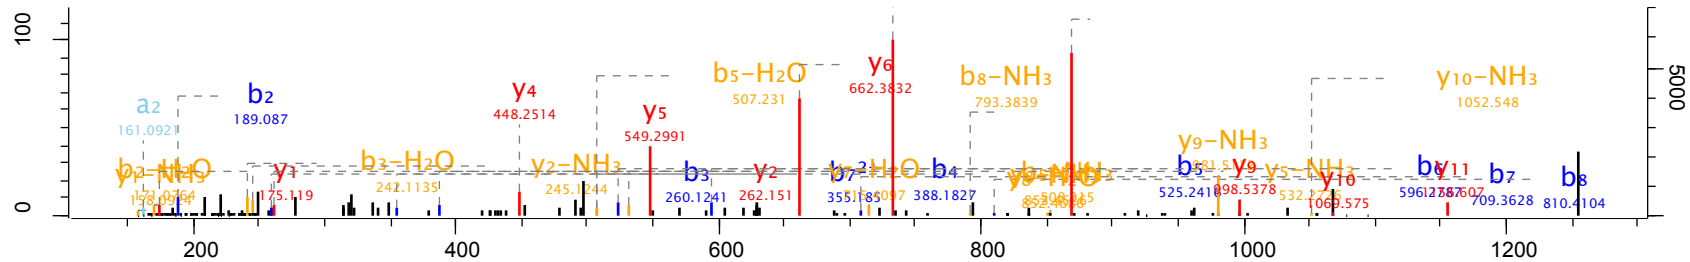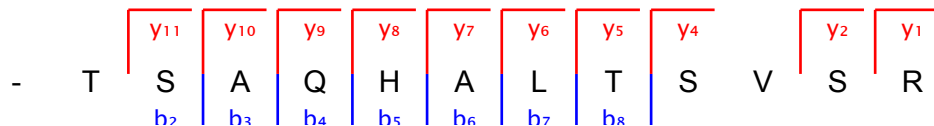



| Raw file                          | Scan  | Method   | Score | m/z    | Gene names |
|-----------------------------------|-------|----------|-------|--------|------------|
| 20141014_fract7_dyn_5ul_E7_01_586 | 10964 | TOF; CID | 78.94 | 538.28 | ZNF670     |

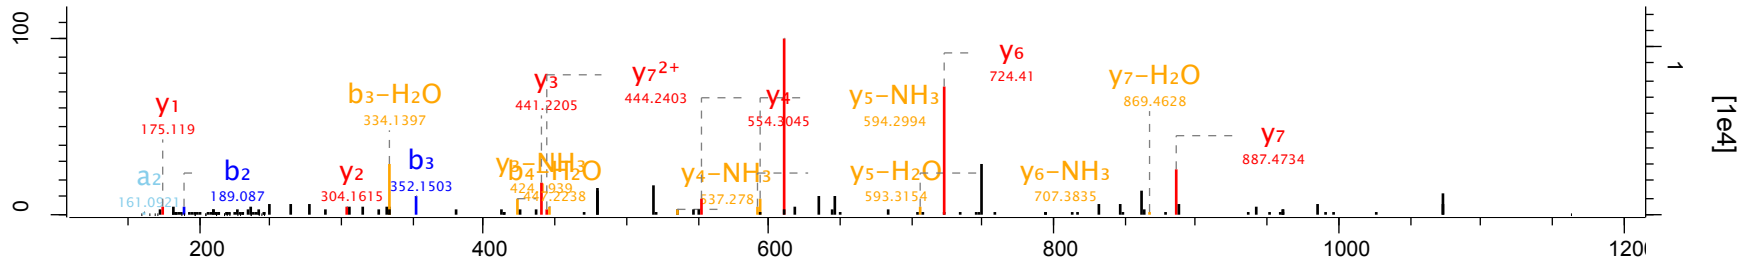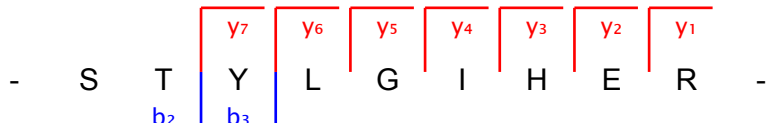

Raw file

20141014\_fract7\_dyn\_5ul\_E7\_01\_586

Scan

12817

Method

TOF; CID

Score

77.6

m/z

619.29

Gene names

USP53

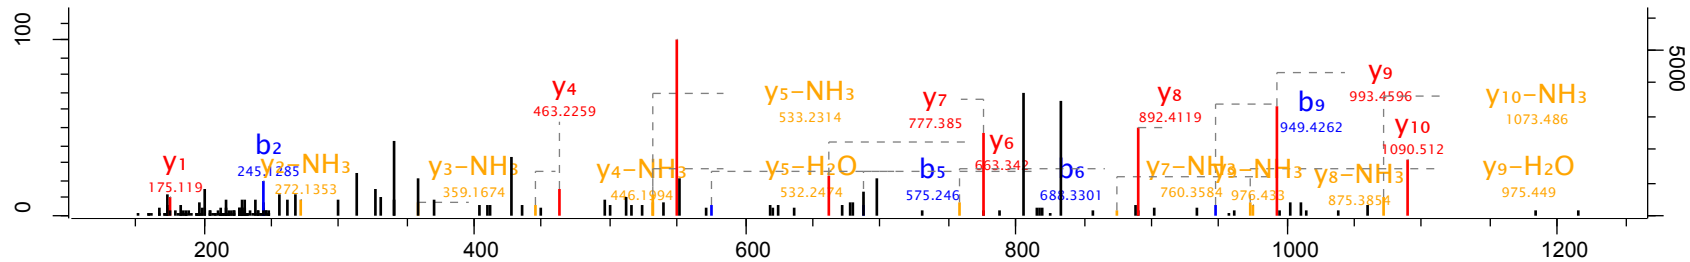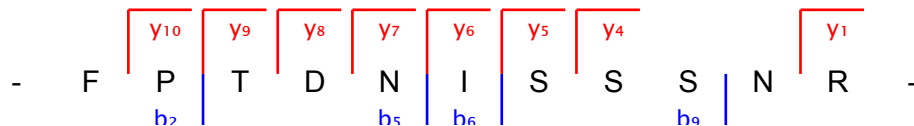

| Raw file                          | Scan  | Method   | Score | m/z    | Gene names |
|-----------------------------------|-------|----------|-------|--------|------------|
| 20141014_fract7_dyn_5ul_E7_01_586 | 17754 | TOF; CID | 49.63 | 453.23 | UBXN2A     |

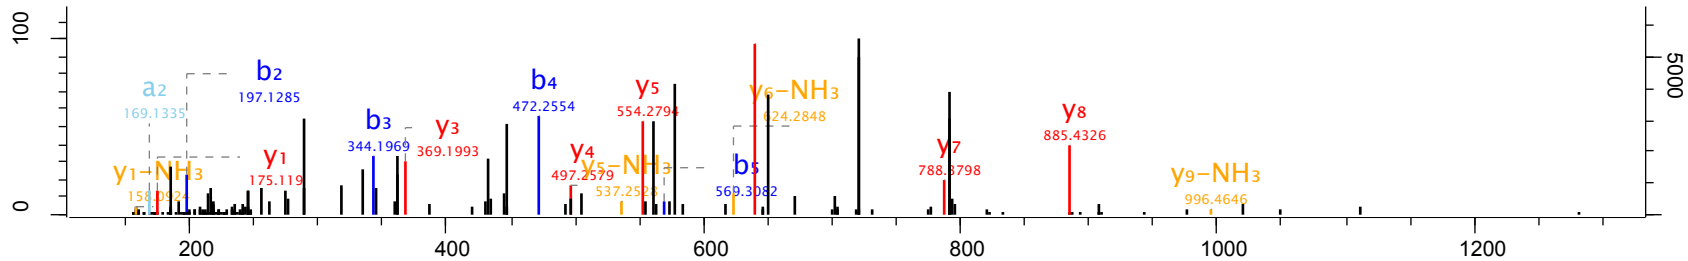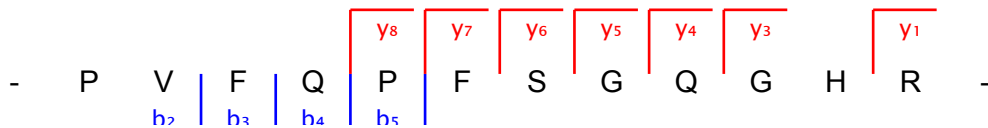

Raw file

20141014\_fract7\_dyn\_5ul\_E7\_01\_586

Scan

18292

Method

TOF; CID

Score

103.13

m/z

777.89

Gene names

C10orf35

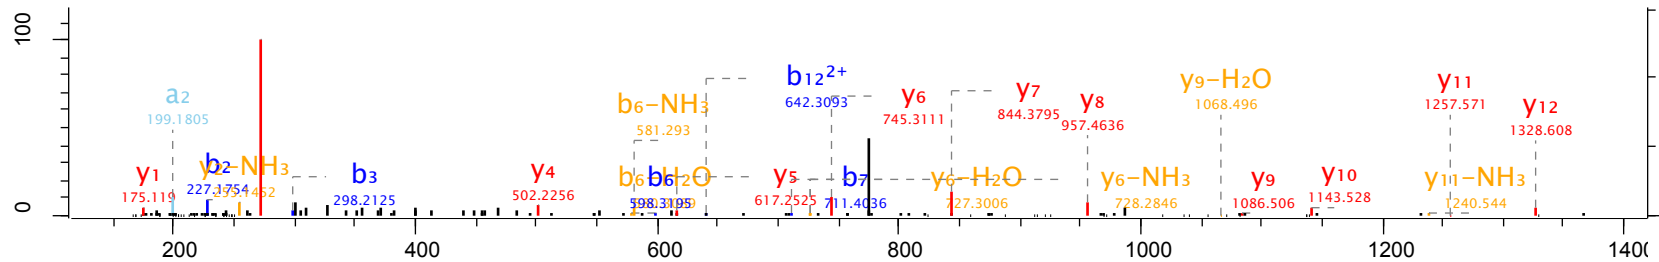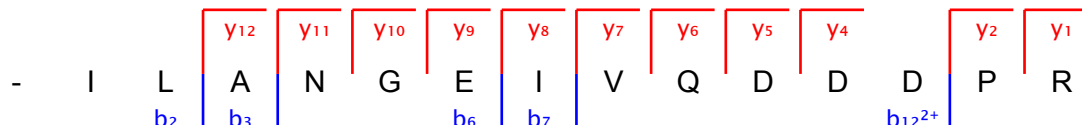

Raw file

20141014\_fract7\_dyn\_5ul\_E7\_01\_586

Scan

20843

Method

TOF; CID

Score

67.93

m/z

611.8

Gene names

TAF13

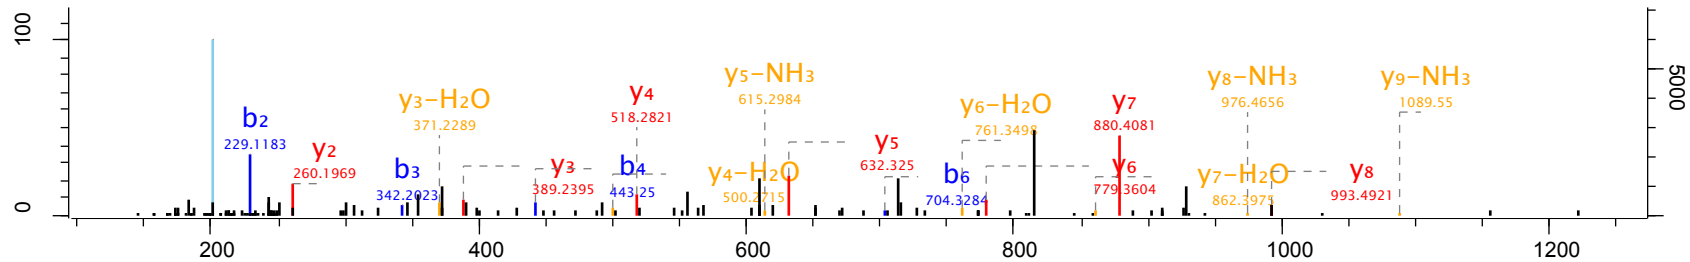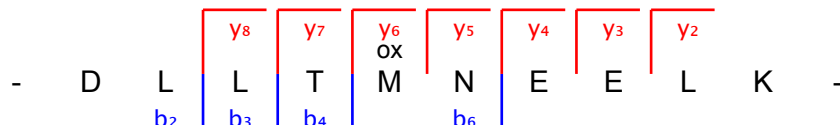

Raw file

20141014\_fract7\_dyn\_5ul\_E7\_01\_586

Scan

20969

Method

TOF; CID

Score

80.74

m/z

926.46

Gene names

LCORL

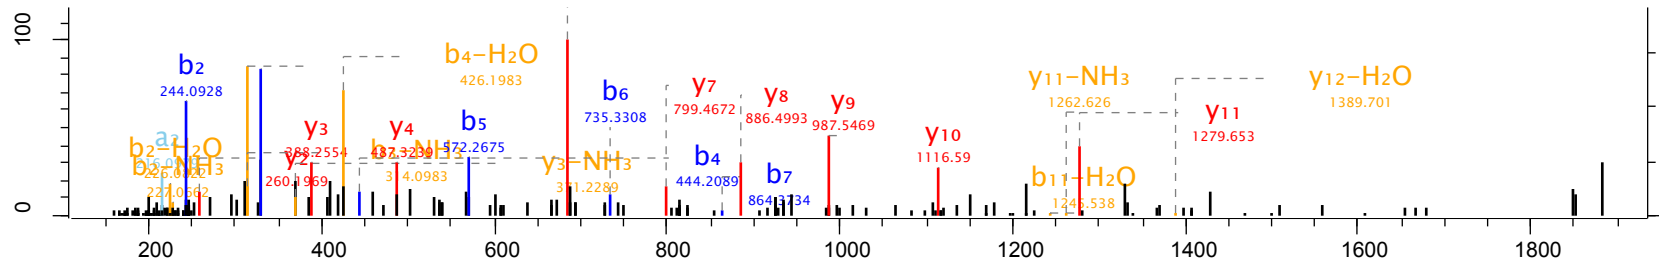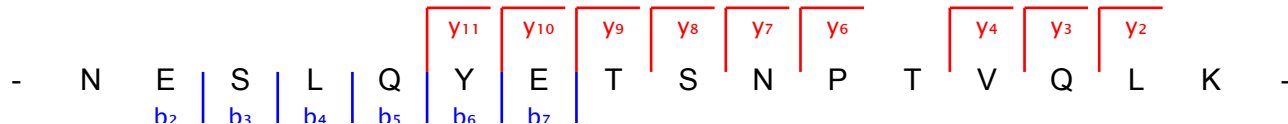

Raw file

20141014\_fract7\_dyn\_5ul\_E7\_01\_586

Scan

24972

Method

TOF; CID

Score

85.36

m/z

926.46

Gene names

HNRNPH1

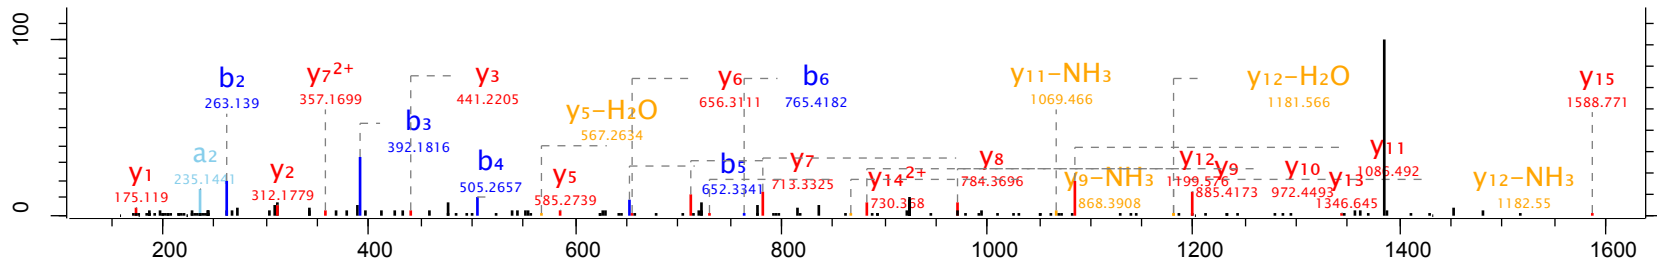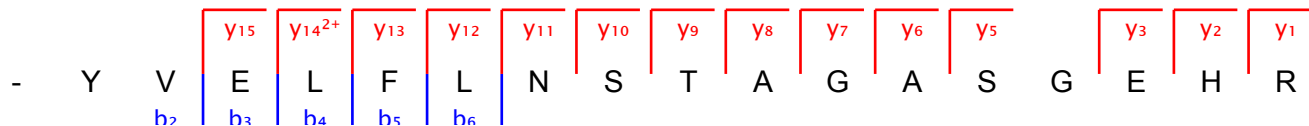

| Raw file                          | Scan  | Method   | Score | m/z    | Gene names |
|-----------------------------------|-------|----------|-------|--------|------------|
| 20141014_fract7_dyn_5ul_E7_01_586 | 25098 | TOF; CID | 92.86 | 692.86 | PLEKHO2    |

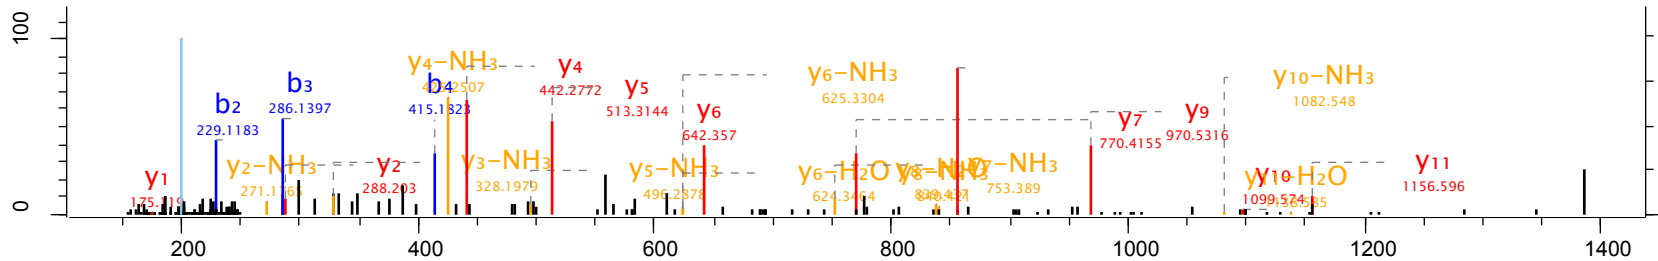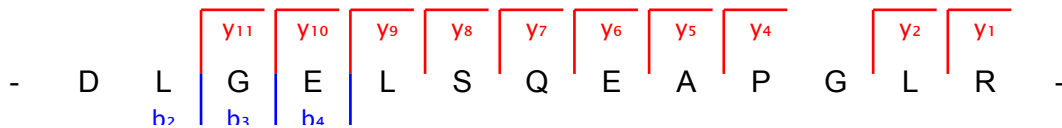



| Raw file                          | Scan  | Method   | Score | m/z   | Gene names |
|-----------------------------------|-------|----------|-------|-------|------------|
| 20141014_fract7_dyn_5ul_E7_01_586 | 29994 | TOF; CID | 63.29 | 778.4 | TBC1D16    |

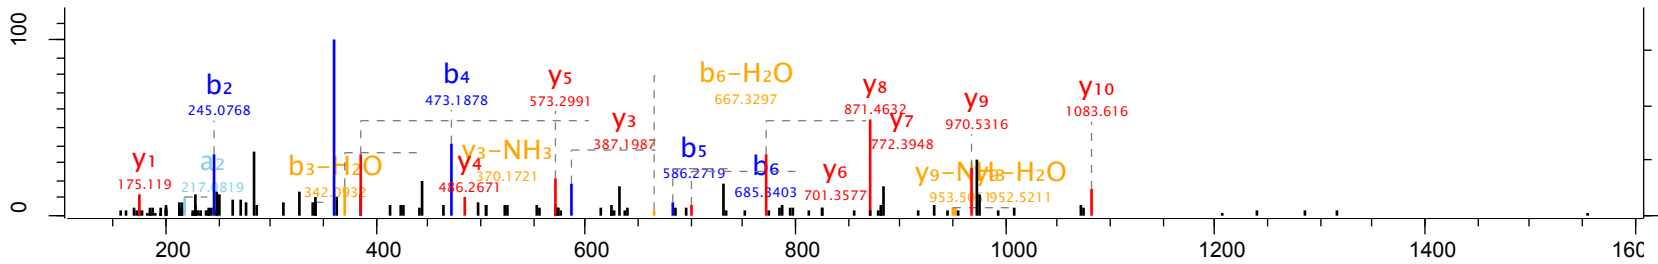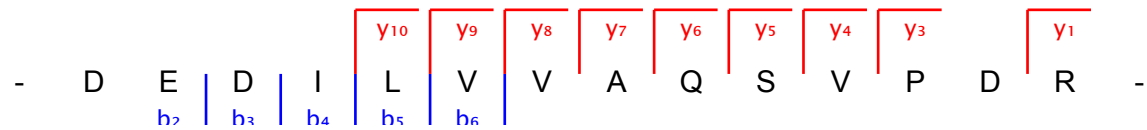

| Raw file                          | Scan  | Method   | Score | m/z    | Gene names |
|-----------------------------------|-------|----------|-------|--------|------------|
| 20141014_fract7_dyn_5ul_E7_01_586 | 31114 | TOF; CID | 39.34 | 560.32 | GRAMD3     |

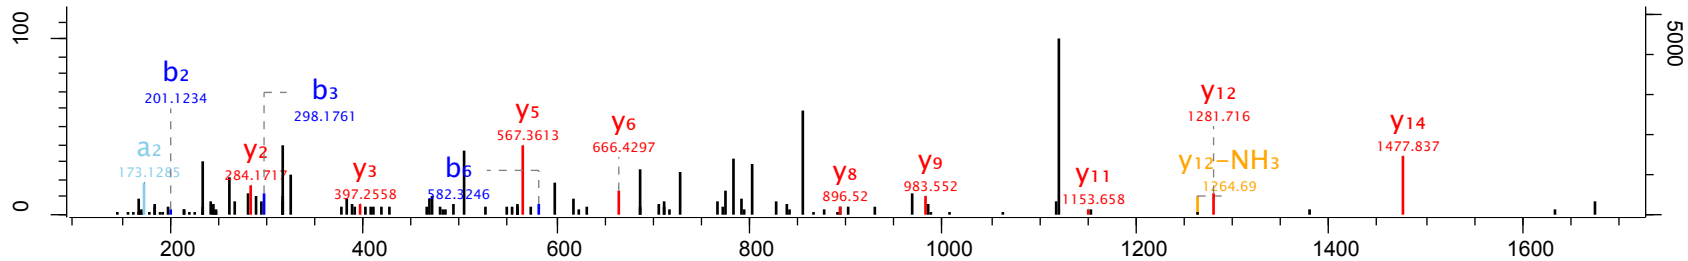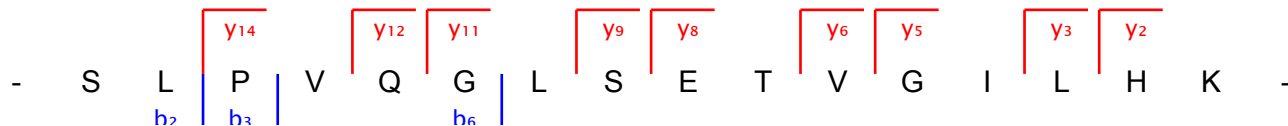

Raw file

20141014\_fract7\_dyn\_5ul\_E7\_01\_586

Scan

34957

Method

TOF; CID

Score

63.16

m/z

839.42

Gene names

GSTM4

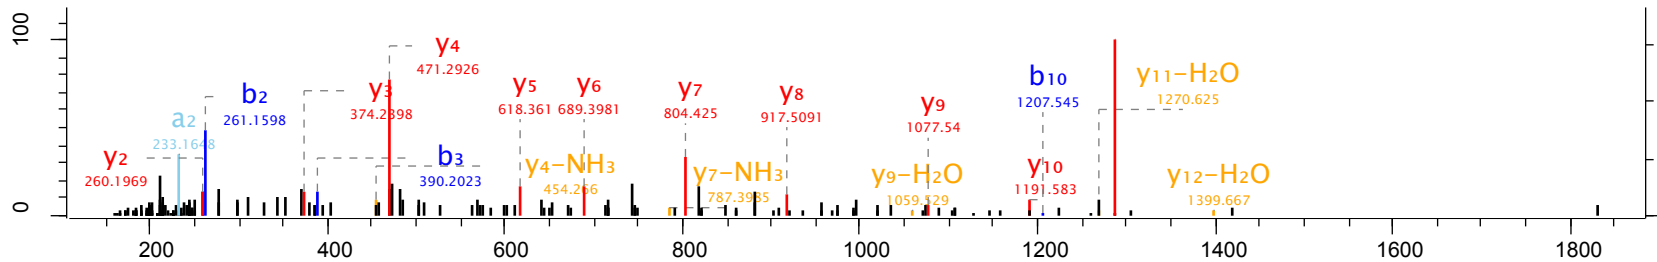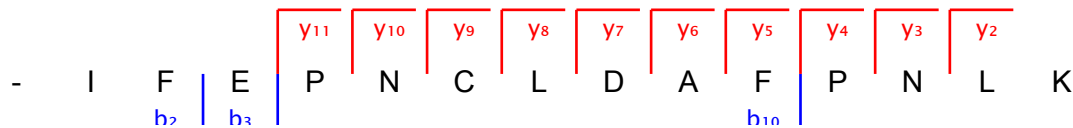

Raw file

20141014\_fract7\_dyn\_5ul\_E7\_01\_586

Scan

37190

Method

TOF; CID

Score

93.23

m/z

892.49

Gene names

PPP1R3F

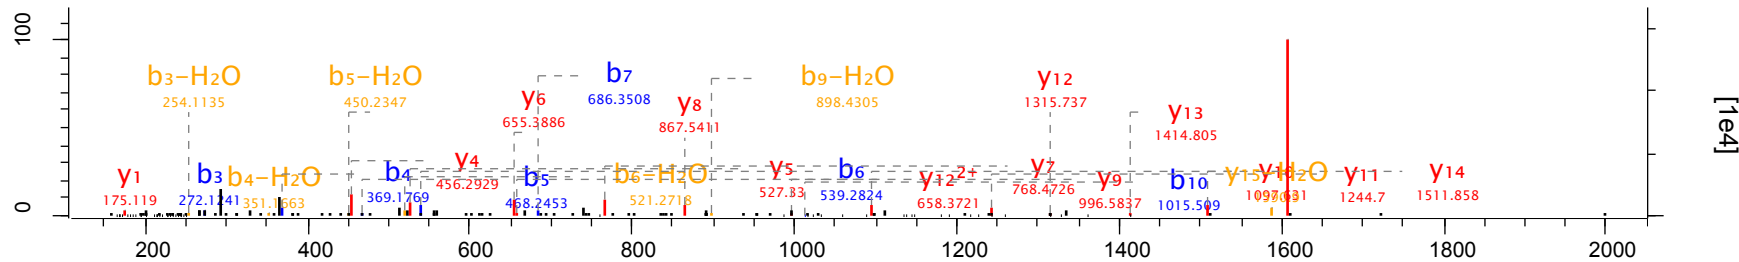

- S S P P V A F T E V L Q A P A I R -

b<sub>3</sub> b<sub>4</sub> b<sub>5</sub> b<sub>6</sub> b<sub>7</sub> b<sub>10</sub>

y<sub>15</sub> y<sub>14</sub> y<sub>13</sub> y<sub>12</sub> y<sub>11</sub> y<sub>10</sub> y<sub>9</sub> y<sub>8</sub> y<sub>7</sub> y<sub>6</sub> y<sub>5</sub> y<sub>4</sub> y<sub>1</sub>

Raw file

20141014\_fract8\_dyn\_5ul\_E8\_01\_587

Scan

9717

Method

TOF; CID

Score

72.2

m/z

547.28

Gene names

ZNF675

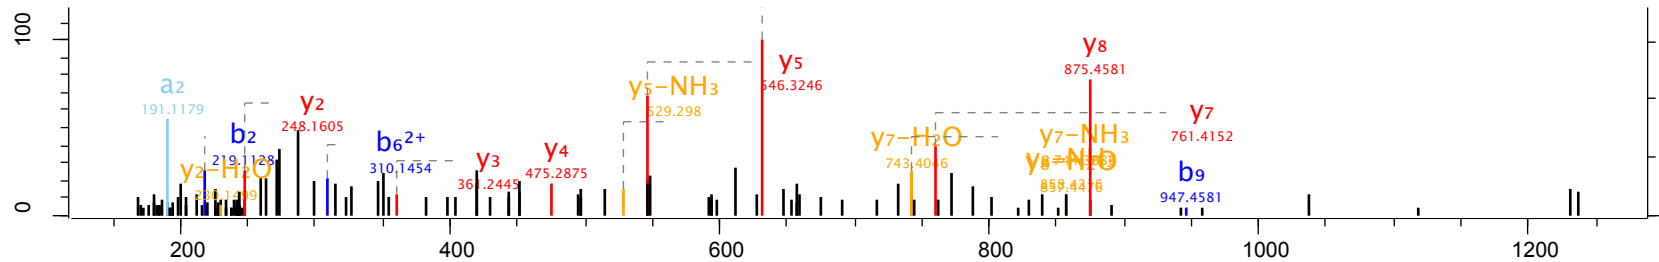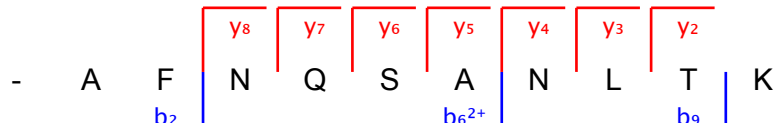

Raw file

20141014\_fract8\_dyn\_5ul\_E8\_01\_587

Scan

9944

Method

TOF; CID

Score

49.04

m/z

546.75

Gene names

LPHN1

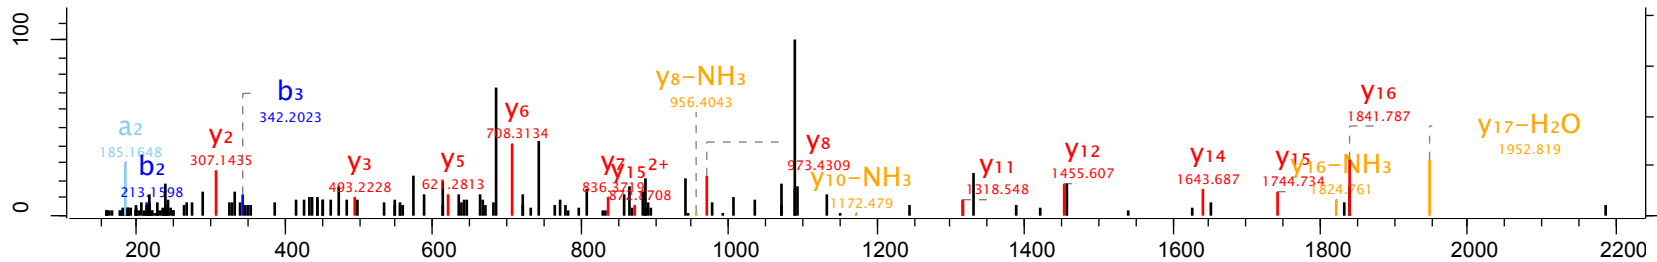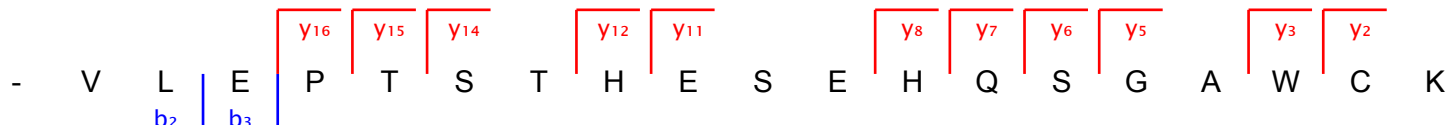

Raw file

20141014\_fract8\_dyn\_5ul\_E8\_01\_587

Scan

13387

Method

TOF; CID

Score

59.2

m/z

578.79

Gene names

TMEM254

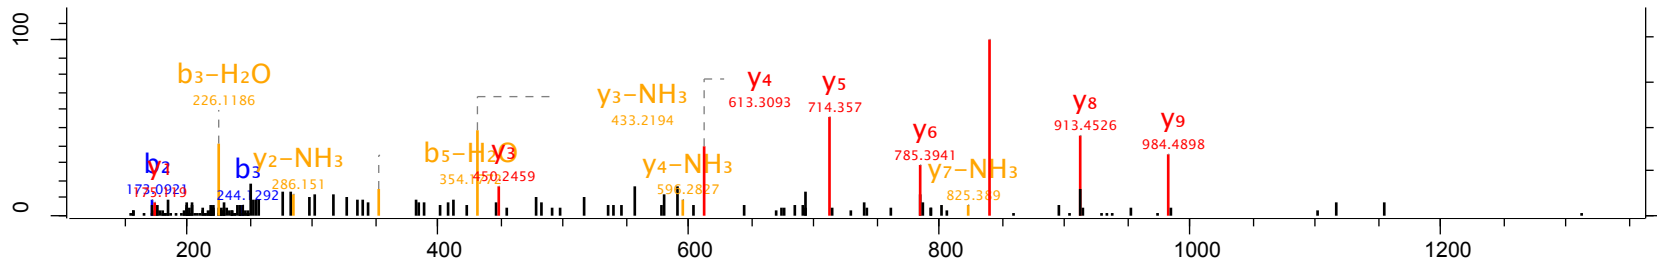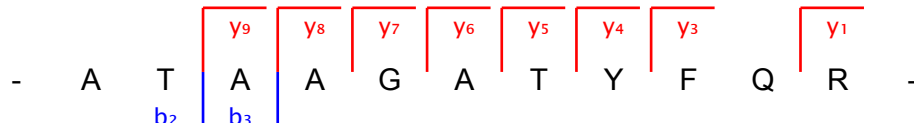

Raw file

20141014\_fract8\_dyn\_5ul\_E8\_01\_587

Scan

13435

Method

TOF; CID

Score

68.52

m/z

656.35

Gene names

UCP2

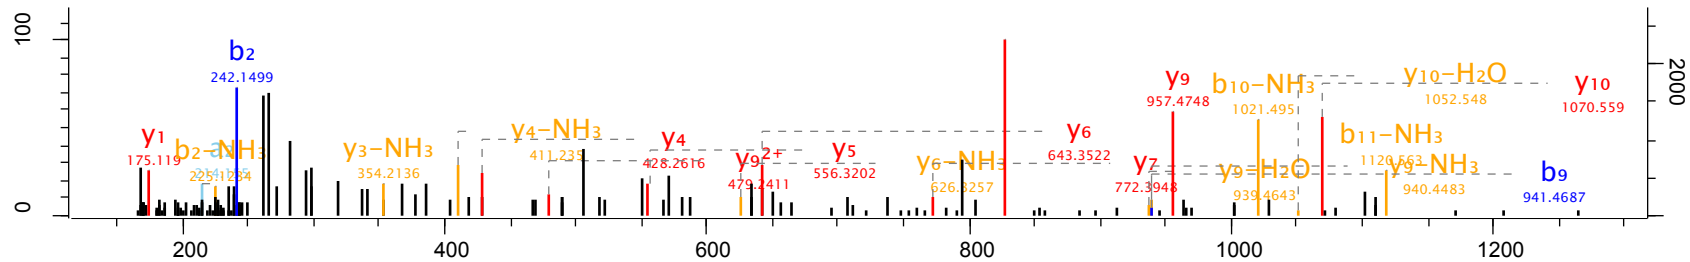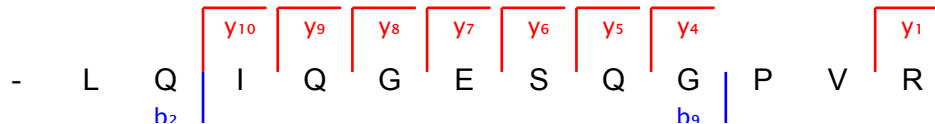



| Raw file                          | Scan  | Method   | Score | m/z    | Gene names |
|-----------------------------------|-------|----------|-------|--------|------------|
| 20141014_fract8_dyn_5ul_E8_01_587 | 16168 | TOF; CID | 63.61 | 624.78 | C11orf83   |

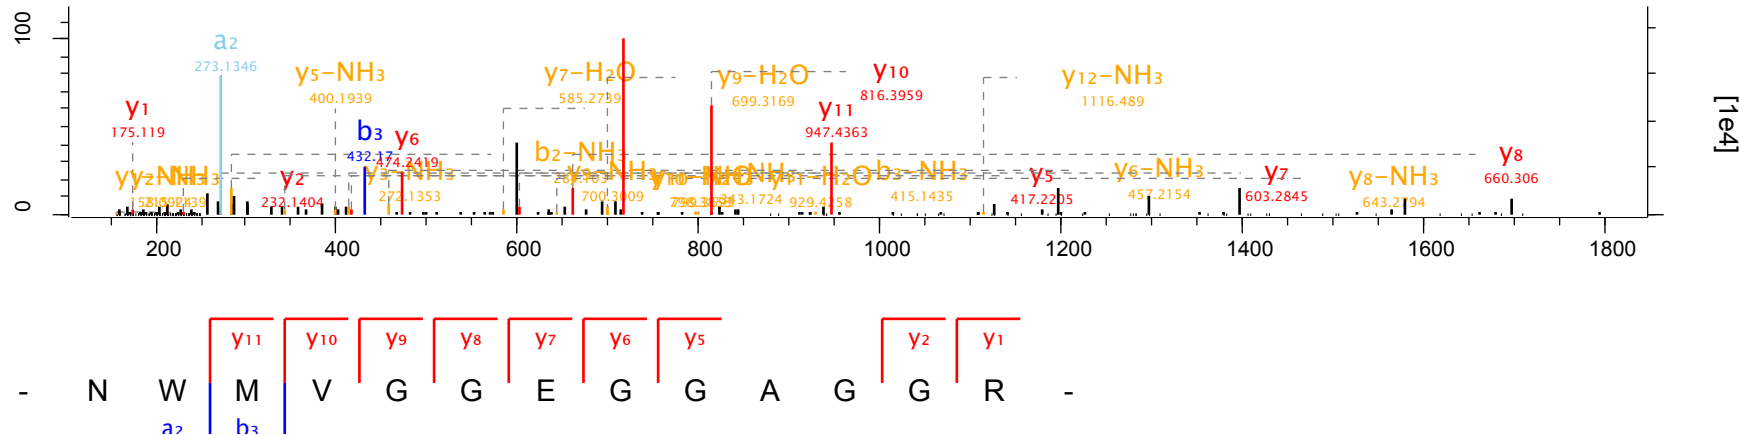

Raw file

20141014\_fract8\_dyn\_5ul\_E8\_01\_587

Scan

17376

Method

TOF; CID

Score

110.41

m/z

539.26

Gene names

NPDC1

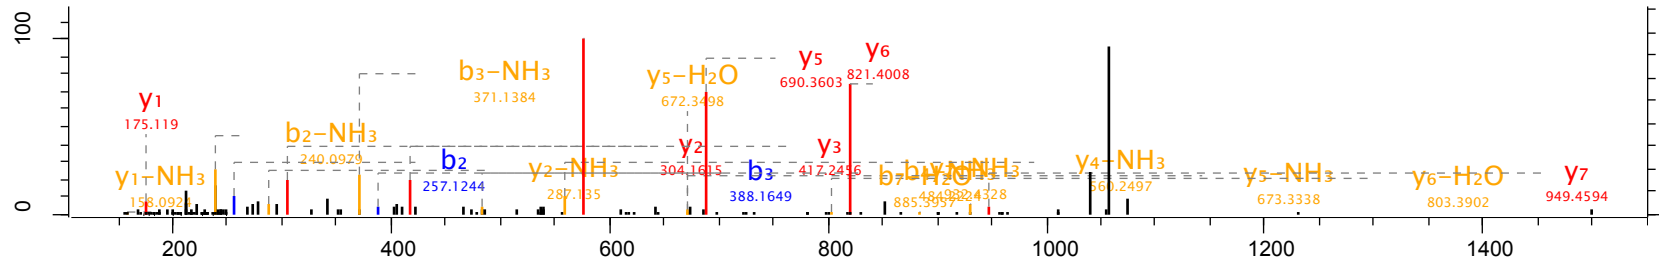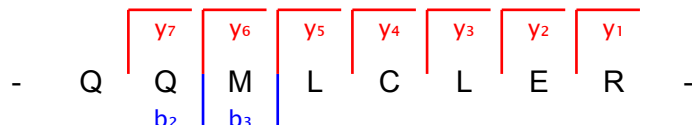

| Raw file                          | Scan  | Method   | Score | m/z    | Gene names |
|-----------------------------------|-------|----------|-------|--------|------------|
| 20141014_fract8_dyn_5ul_E8_01_587 | 17469 | TOF; CID | 94.82 | 566.29 | C6orf57    |

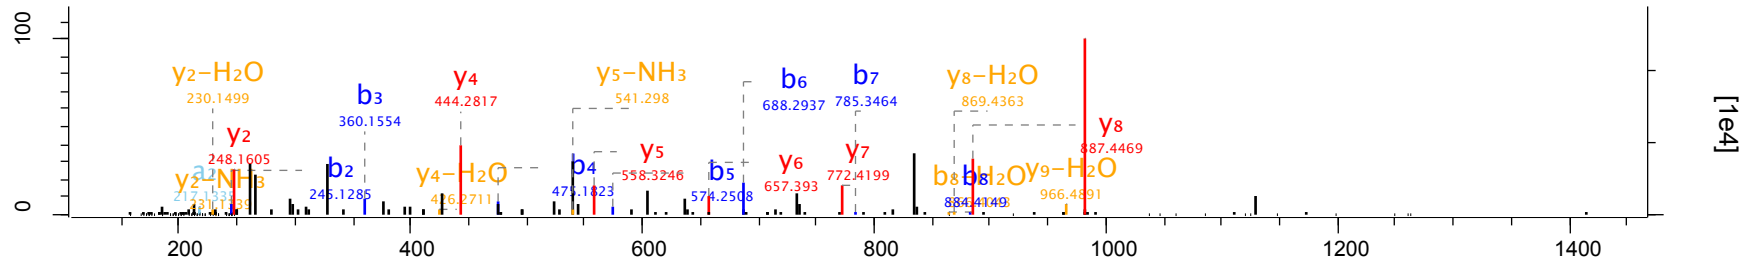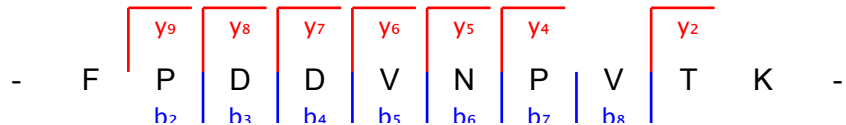

Raw file

20141014\_fract8\_dyn\_5ul\_E8\_01\_587

Scan

23332

Method

TOF; CID

Score

61.11

m/z

670.36

Gene names

CSTA

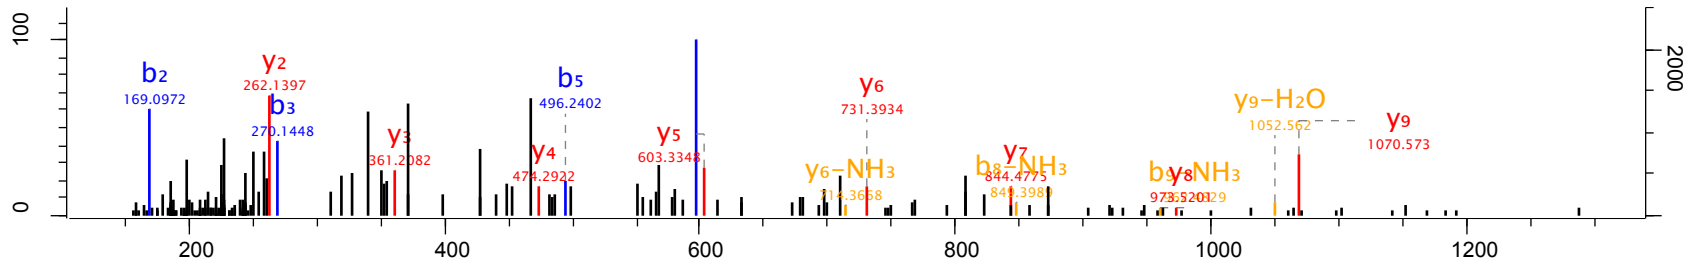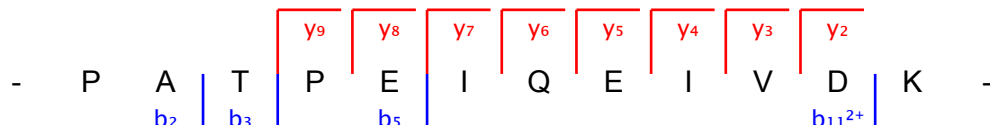

Raw file

20141014\_fract8\_dyn\_5ul\_E8\_01\_587

Scan

24831

Method

TOF; CID

Score

60.33

m/z

676.35

Gene names

ZNF202

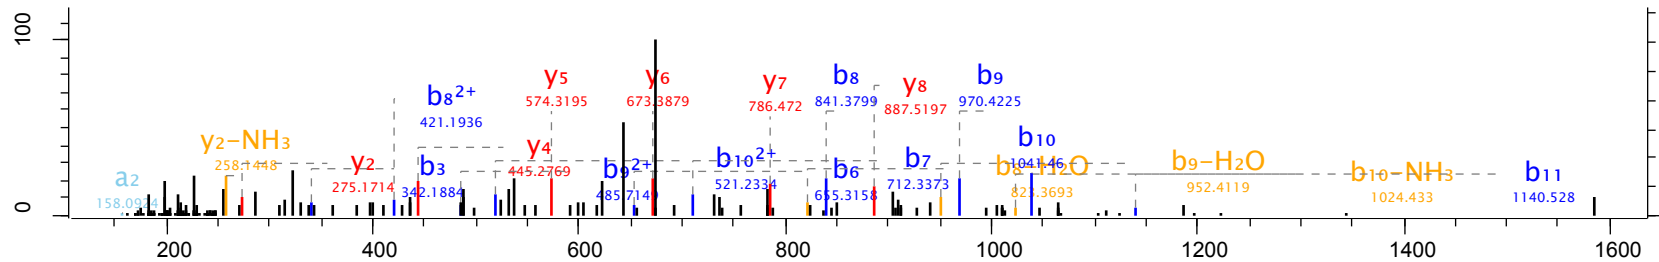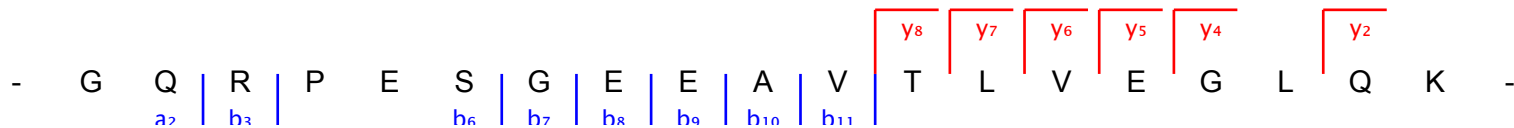

| Raw file                          | Scan  | Method   | Score | m/z    | Gene names |
|-----------------------------------|-------|----------|-------|--------|------------|
| 20141014_fract8_dyn_5ul_E8_01_587 | 25255 | TOF; CID | 67.38 | 582.29 | TMLHE      |

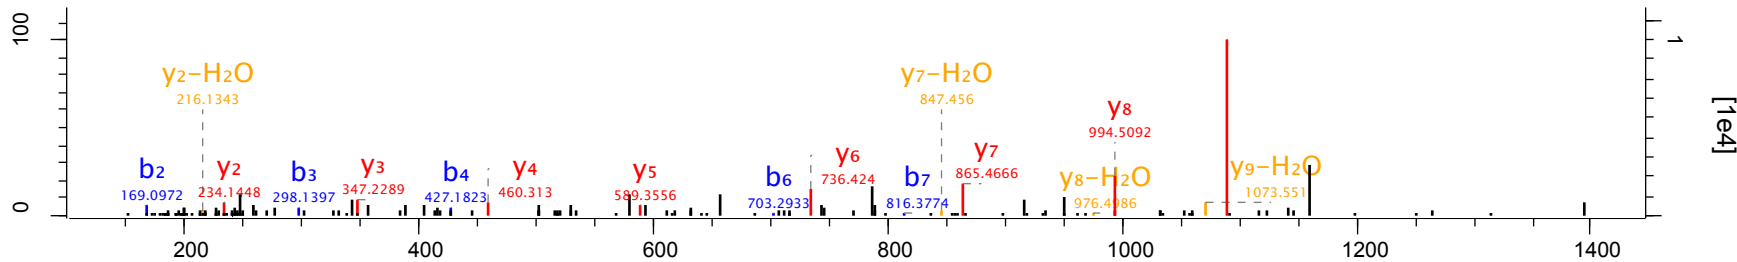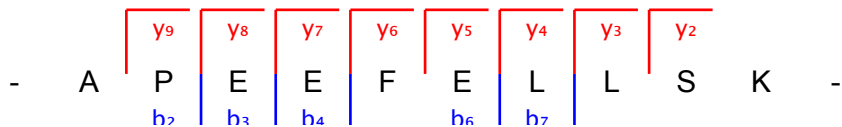

Raw file

20141014\_fract8\_dyn\_5ul\_E8\_01\_587

Scan

25841

Method

TOF; CID

Score

102.07

m/z

502.27

Gene names

PGM5

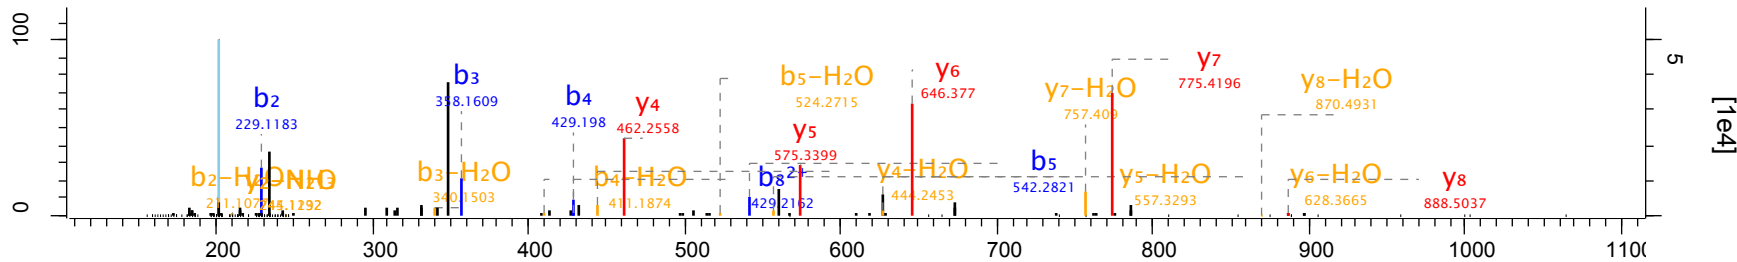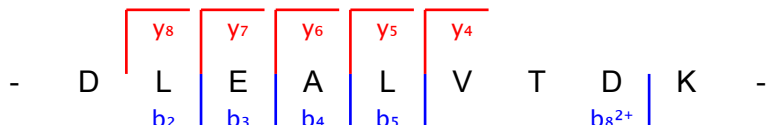

Raw file

20141014\_fract8\_dyn\_5ul\_E8\_01\_587

Scan

26052

Method

TOF; CID

Score

114.28

m/z

546.32

Gene names

BHLHB9

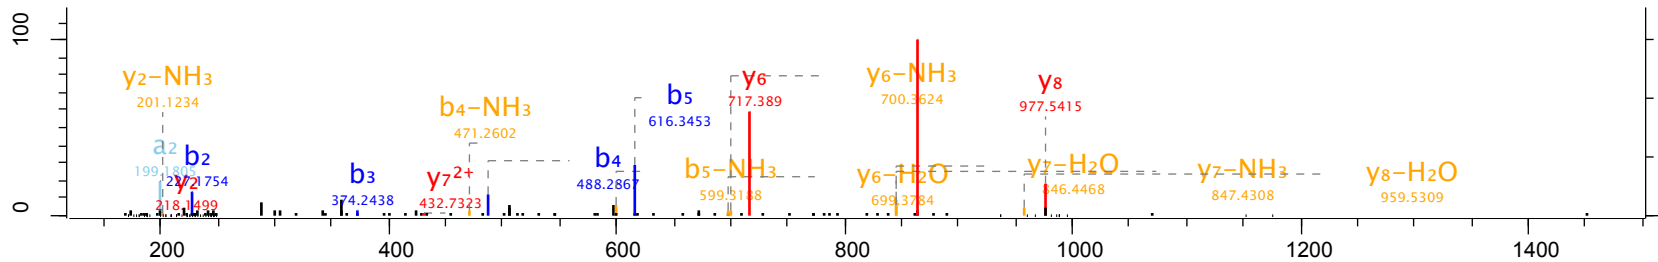

[1e4]

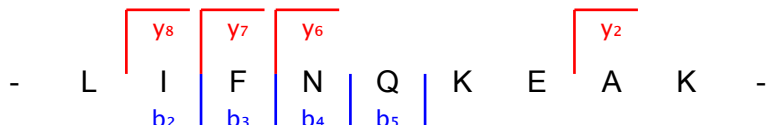



Raw file

20141014\_fract8\_dyn\_5ul\_E8\_01\_587

Scan

29898

Method

TOF; CID

Score

113.42

m/z

1173.05

Gene names

PKIG

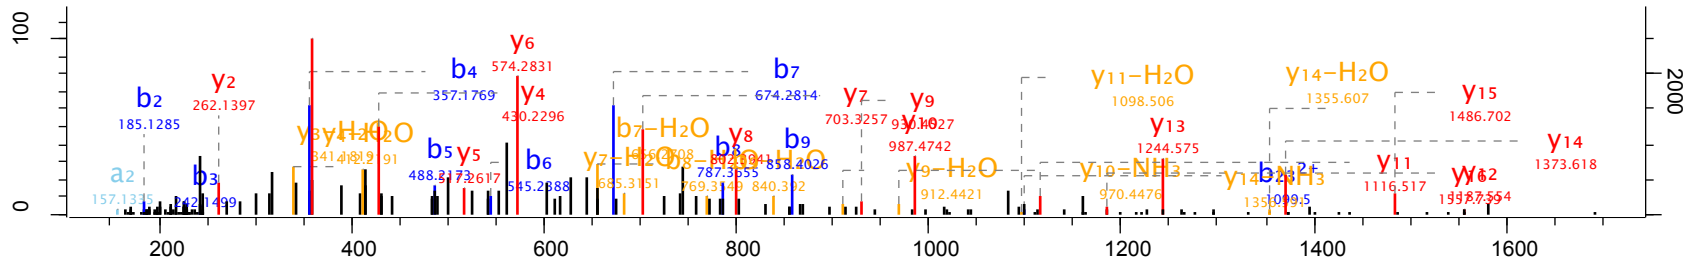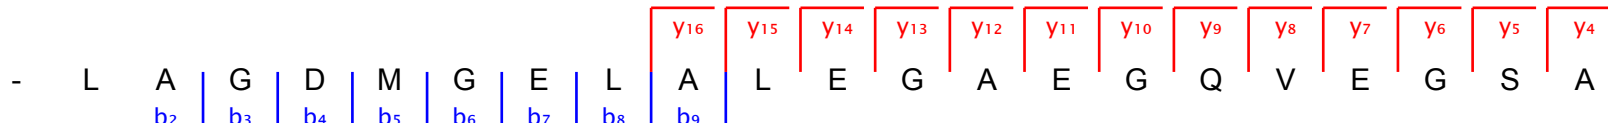

Raw file

20141014\_fract8\_dyn\_5ul\_E8\_01\_587

Scan

31118

Method

TOF; CID

Score

49.54

m/z

869.42

Gene names

MFSD8

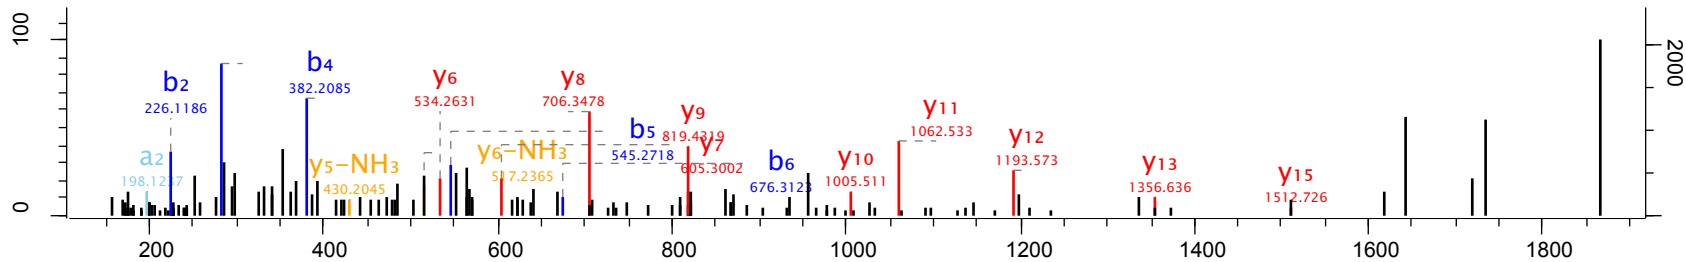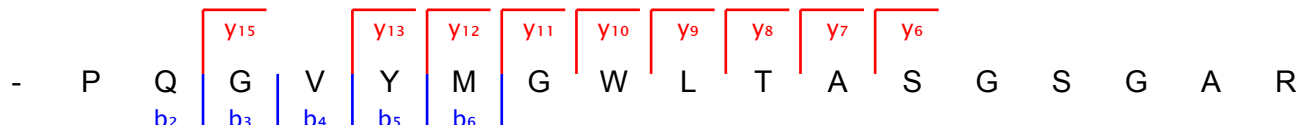

| Raw file                          | Scan  | Method   | Score | m/z    | Gene names |
|-----------------------------------|-------|----------|-------|--------|------------|
| 20141014_fract8_dyn_5ul_E8_01_587 | 36842 | TOF; CID | 80.24 | 497.58 | KCTD7      |

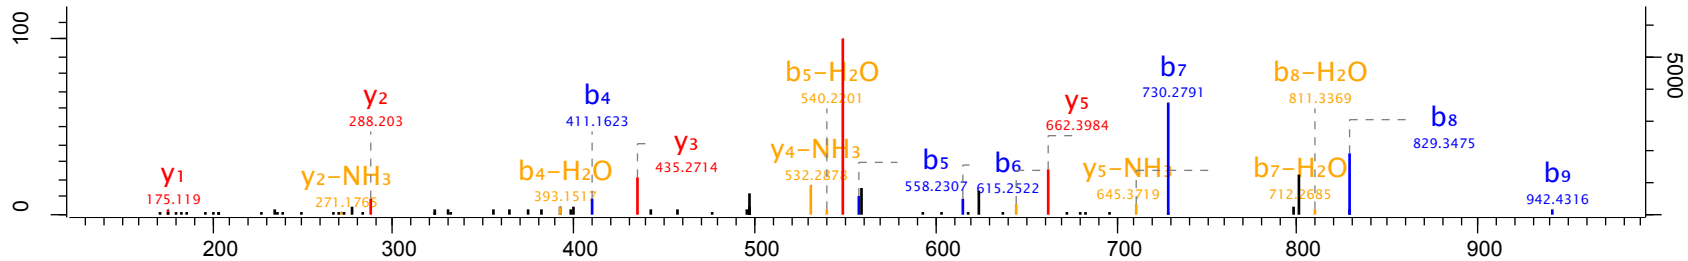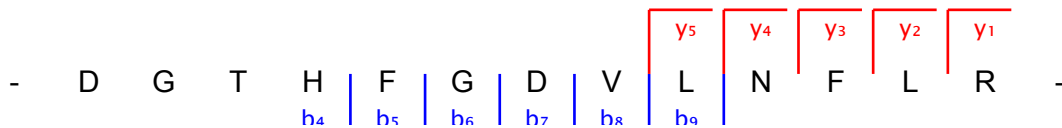

| Raw file                          | Scan  | Method   | Score | m/z    | Gene names |
|-----------------------------------|-------|----------|-------|--------|------------|
| 20141014_fract8_dyn_5ul_E8_01_587 | 38691 | TOF; CID | 54.28 | 729.39 | IDNK       |

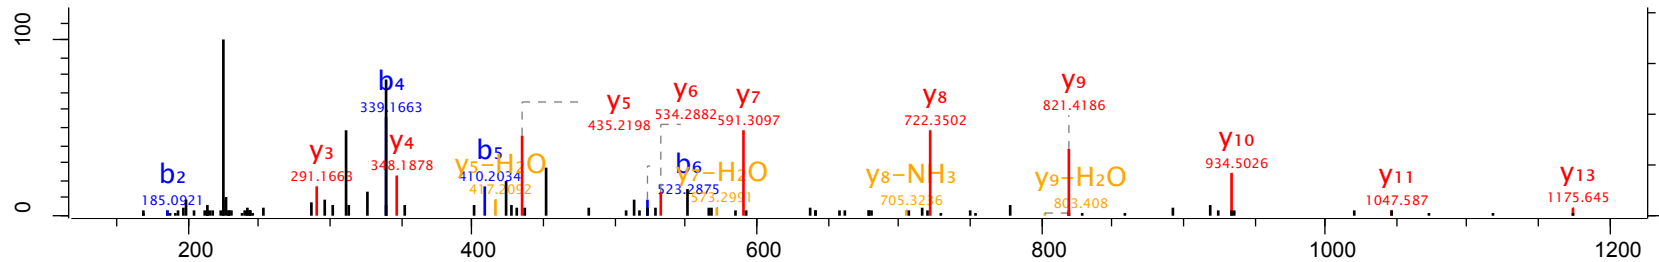

ac

- A A | P G | A L | L V | M G | V S | G S G K -

b<sub>2</sub> | b<sub>4</sub> | b<sub>5</sub> | b<sub>6</sub>

y<sub>13</sub> | y<sub>11</sub> | y<sub>10</sub> | y<sub>9</sub> | y<sub>8</sub> | y<sub>7</sub> | y<sub>6</sub> | y<sub>5</sub> | y<sub>4</sub> | y<sub>3</sub>

Raw file

20141014\_fract9\_dyn\_5ul\_F1\_01\_588

Scan

4674

Method

TOF; CID

Score

91.55

m/z

521.78

Gene names

SLC16A7

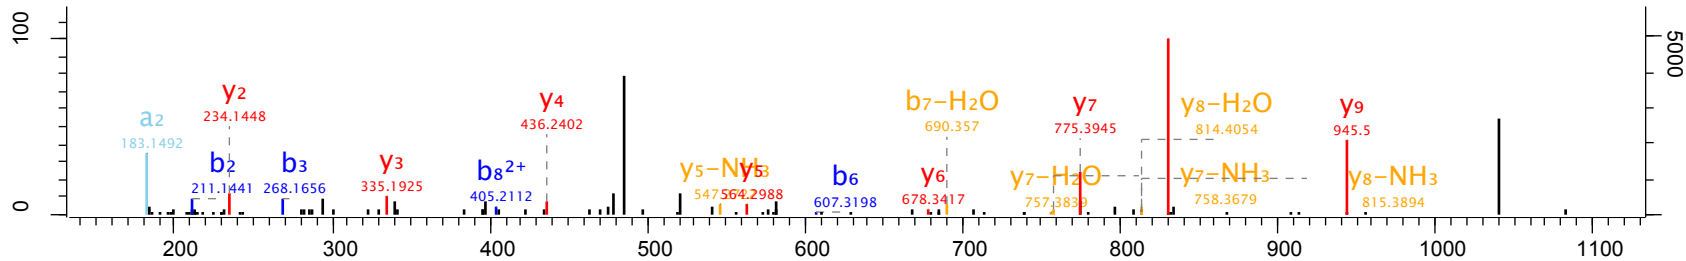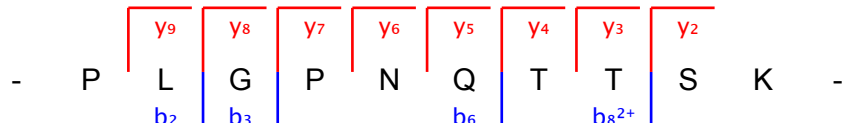

Raw file

20141014\_fract9\_dyn\_5ul\_F1\_01\_588

Scan

Method

Score

m/z

Gene names

9754

TOF; CID

37.46

690.32

PPAPDC2

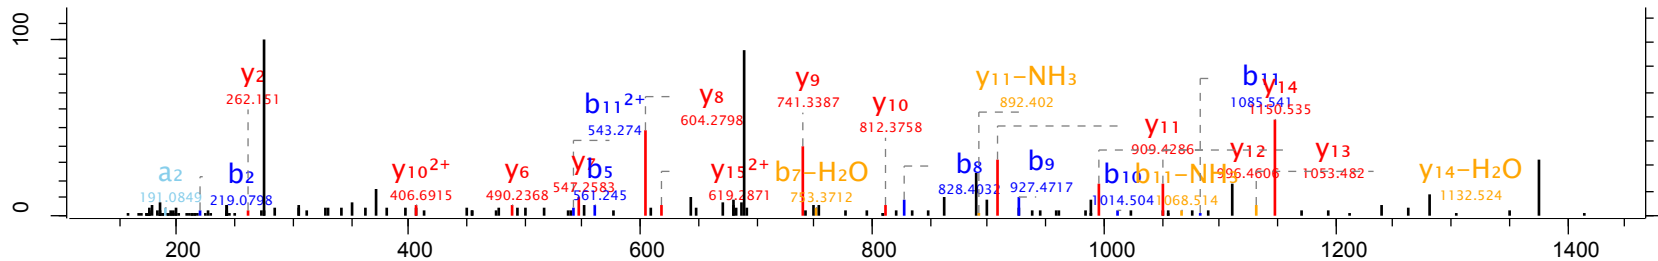

- S M | E G R | P L G | V | S | A | S S S S S | S P G S P

h<sub>2</sub> | h<sub>5</sub> | h<sub>8</sub> | h<sub>9</sub> | h<sub>10</sub> | h<sub>11</sub>

y<sub>15</sub><sup>2+</sup> y<sub>14</sub> y<sub>13</sub> y<sub>12</sub> y<sub>11</sub>

Raw file

20141014\_fract9\_dyn\_5ul\_F1\_01\_588

Scan

11317

Method

TOF; CID

Score

133.81

m/z

438.18

Gene names

CITED2

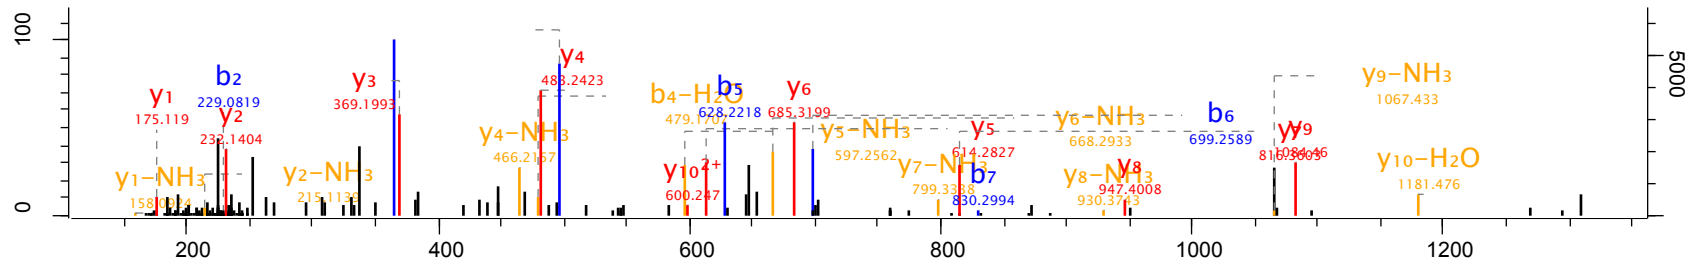

ac

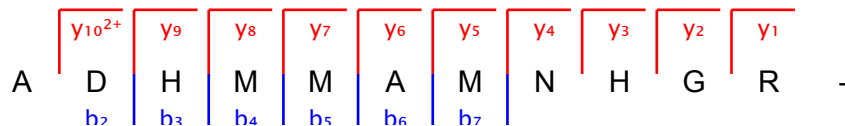

| Raw file                          | Scan  | Method   | Score | m/z    | Gene names |
|-----------------------------------|-------|----------|-------|--------|------------|
| 20141014_fract9_dyn_5ul_F1_01_588 | 12656 | TOF; CID | 90.14 | 600.83 | SPATA24    |

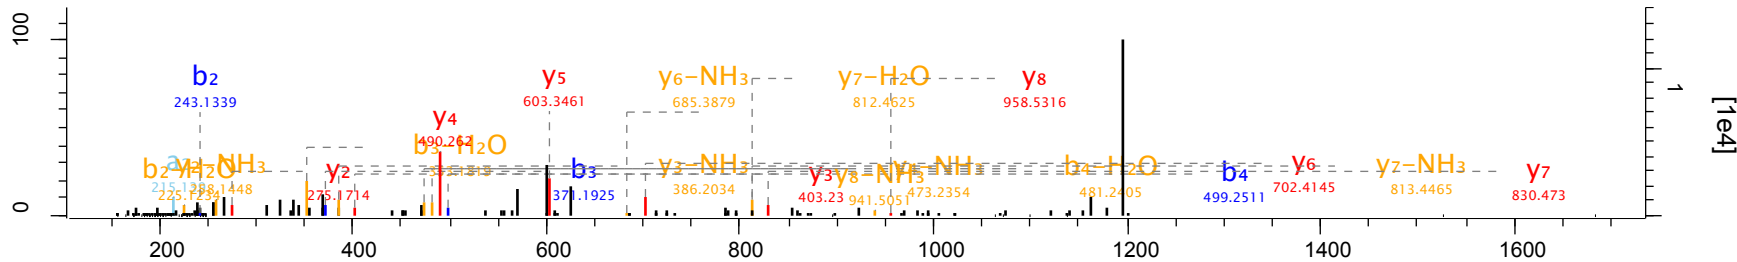

Protein sequence: - E L Q Q V I S Q Q K -

Fragmentation sites (b and y ions) are indicated by brackets above the sequence:

- b<sub>2</sub> (blue) is between L and Q.
- b<sub>3</sub> (blue) is between Q and Q.
- b<sub>4</sub> (blue) is between V and I.
- y<sub>2</sub> (red) is between Q and Q.
- y<sub>3</sub> (red) is between Q and Q.
- y<sub>4</sub> (red) is between S and Q.
- y<sub>5</sub> (red) is between I and S.
- y<sub>6</sub> (red) is between V and I.
- y<sub>7</sub> (red) is between Q and Q.
- y<sub>8</sub> (red) is between L and Q.



Raw file

20141014\_fract9\_dyn\_5ul\_F1\_01\_588

Scan

13990

Method

TOF; CID

Score

59.73

m/z

759.36

Gene names

IGFBP7

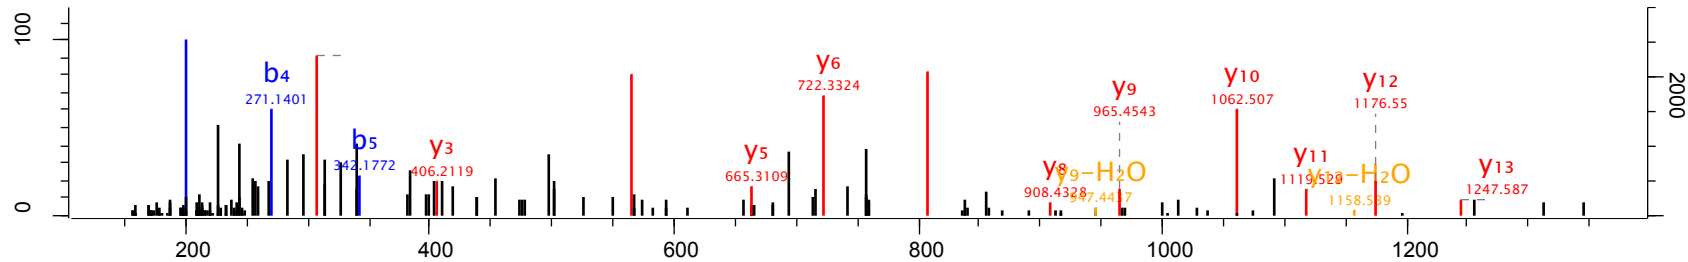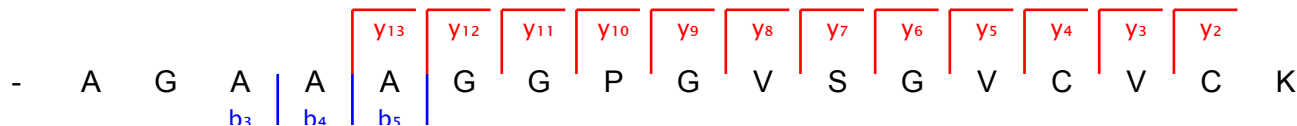

Raw file

20141014\_fract9\_dyn\_5ul\_F1\_01\_588

Scan

15090

Method

TOF; CID

Score

83.62

m/z

492.24

Gene names

TNFSF9

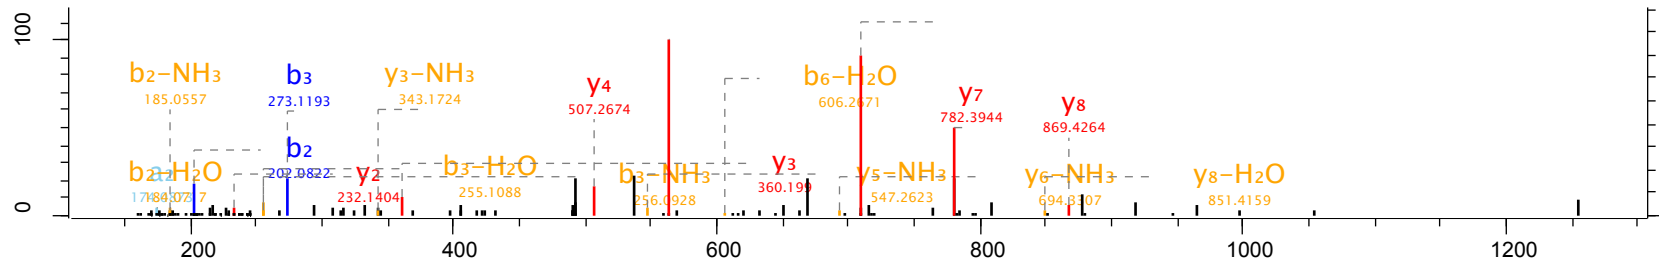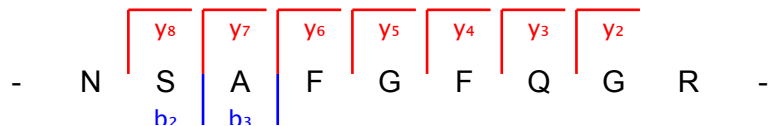

| Raw file                          | Scan  | Method   | Score  | m/z    | Gene names    |
|-----------------------------------|-------|----------|--------|--------|---------------|
| 20141014_fract9_dyn_5ul_F1_01_588 | 15195 | TOF; CID | 102.46 | 454.25 | ATP5E;ATP5EP2 |

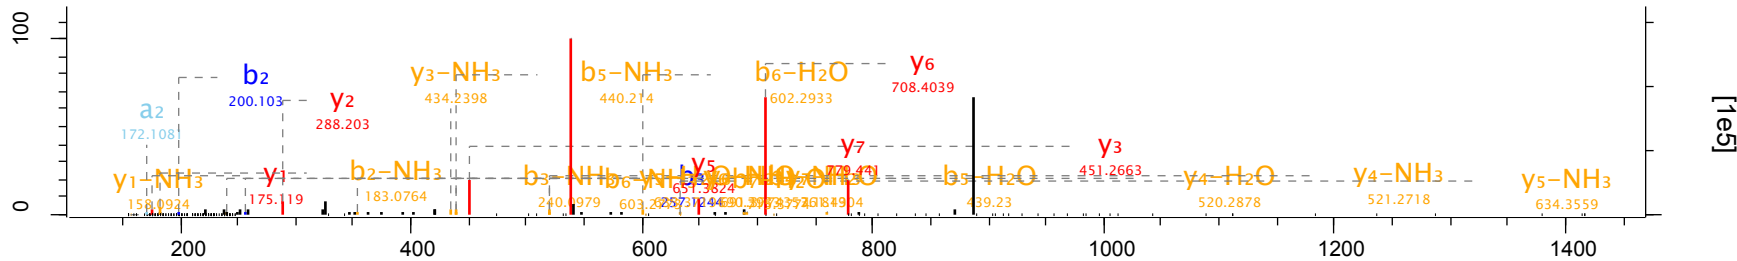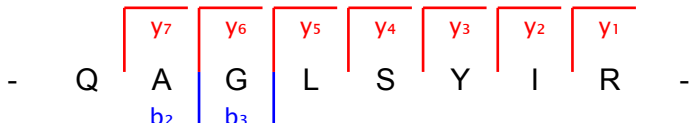

Raw file: 20141014\_fract9\_dyn\_5ul\_F1\_01\_588  
 Scan: 16089  
 Method: TOF; CID  
 Score: 143.42  
 m/z: 824.4  
 Gene names: SS18L1

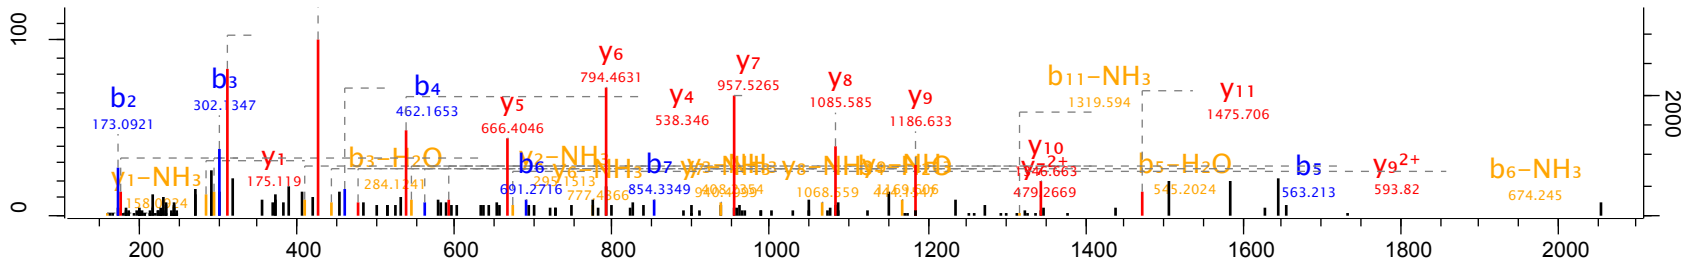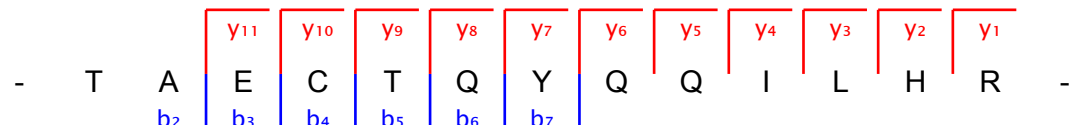

Raw file

20141014\_fract9\_dyn\_5ul\_F1\_01\_588

Scan

18962

Method

TOF; CID

Score

110.44

m/z

850.9

Gene names

ZNF239

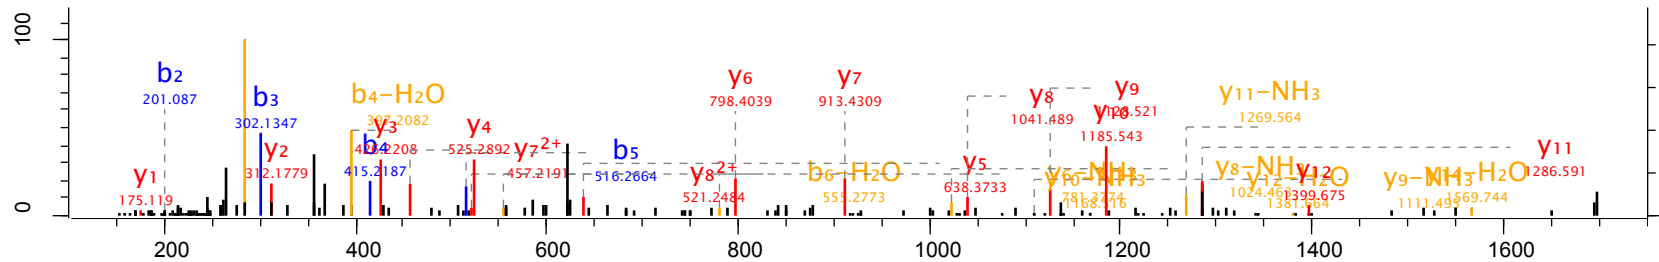

ac

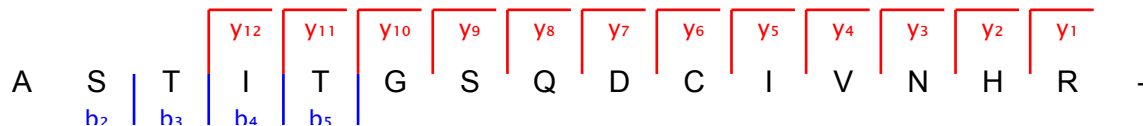

Raw file

20141014\_fract9\_dyn\_5ul\_F1\_01\_588

Scan

23263

Method

TOF; CID

Score

41.36

m/z

957.78

Gene names

SLC20A2

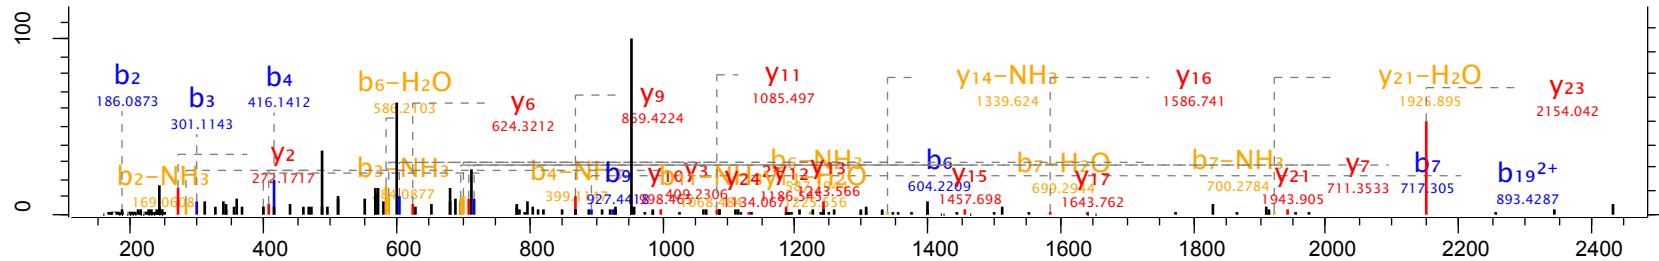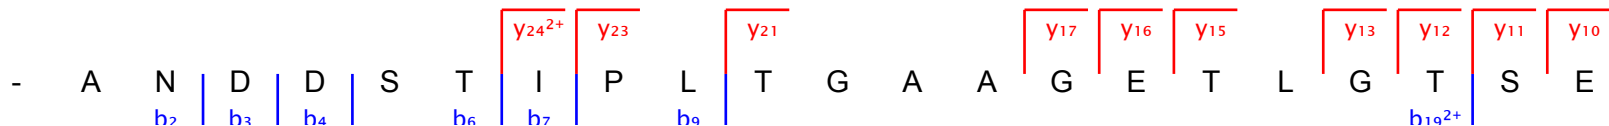

Raw file

20141014\_fract9\_dyn\_5ul\_F1\_01\_588

Scan

23673

Method

TOF; CID

Score

140.14

m/z

661.32

Gene names

SLC6A9

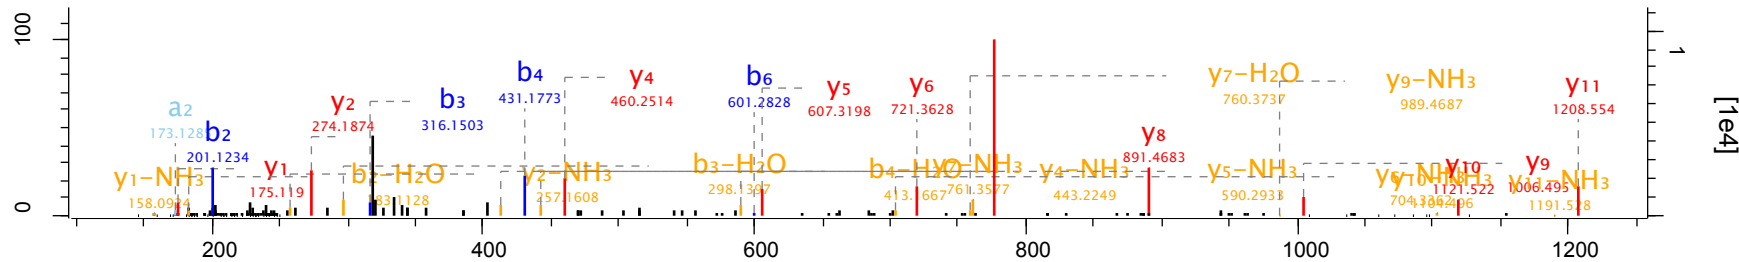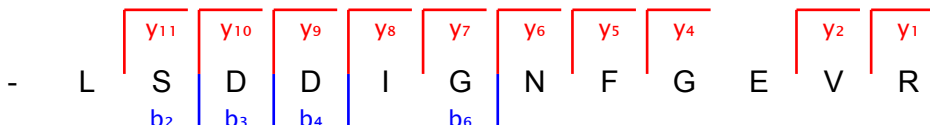

Raw file

20141014\_fract9\_dyn\_5ul\_F1\_01\_588

Scan

25104

Method

TOF; CID

Score

93.32

m/z

632.34

Gene names

CKLF

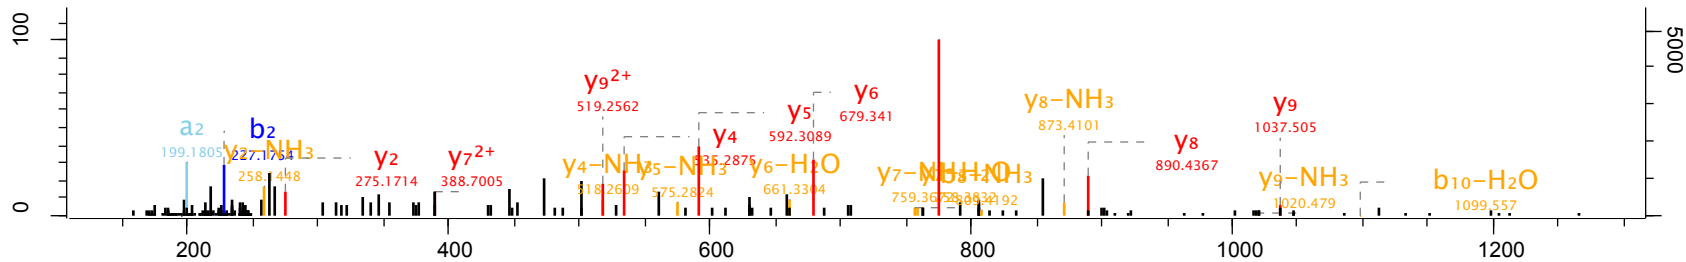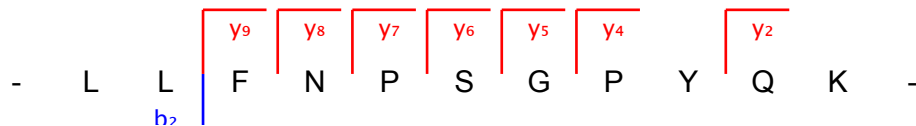



Raw file

20141014\_fract9\_dyn\_5ul\_F1\_01\_588

Scan

29640

Method

TOF; CID

Score

57.53

m/z

442.61

Gene names

FAM150B

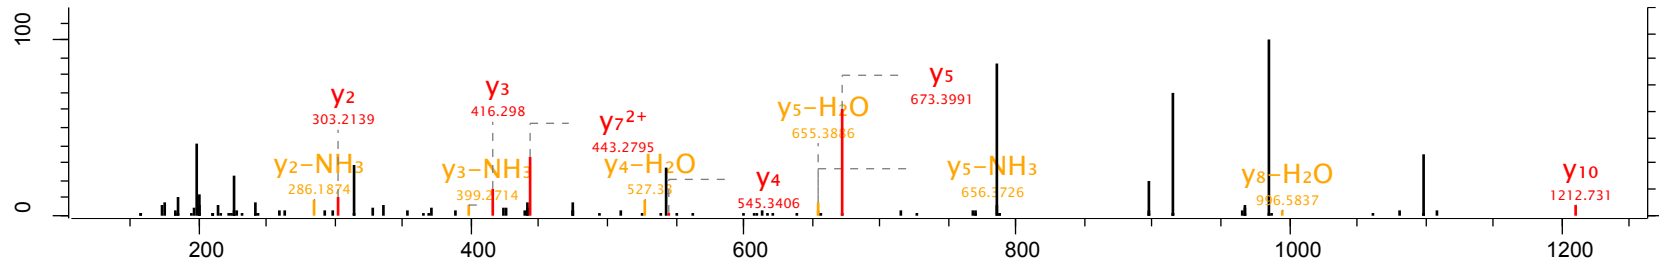

- L V V E L V Q E L R K -

Red brackets above the sequence indicate the following y-series: y<sub>10</sub> (above V), y<sub>7<sup>2+</sup></sub> (above L), y<sub>5</sub> (above Q), y<sub>4</sub> (above E), y<sub>3</sub> (above L), and y<sub>2</sub> (above R).

Raw file

20141014\_fract9\_dyn\_5ul\_F1\_01\_588

Scan

29908

Method

TOF; CID

Score

64.45

m/z

865.99

Gene names

KRTCAP2

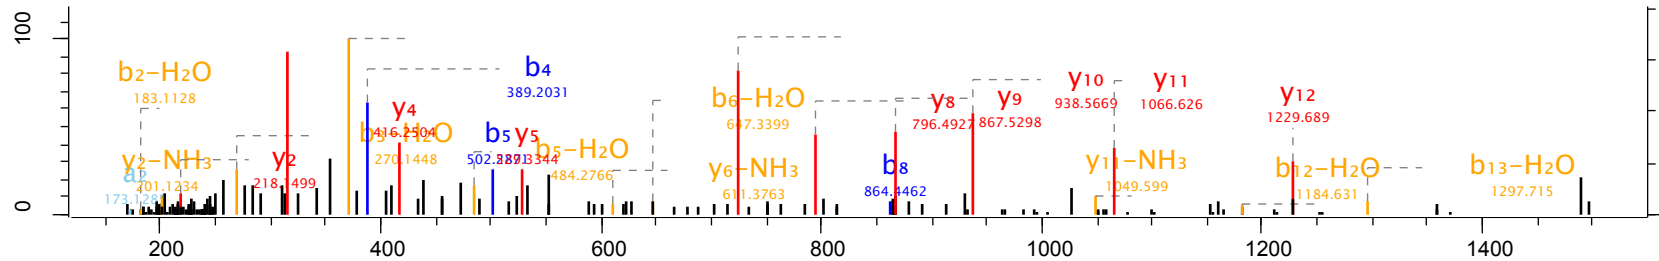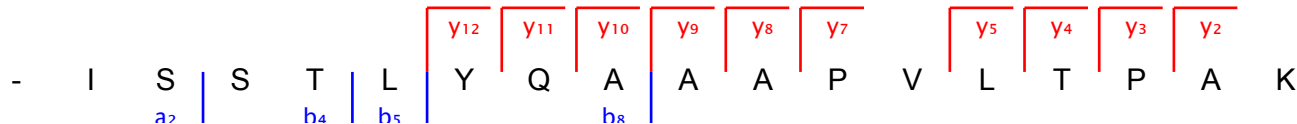

| Raw file                          | Scan  | Method   | Score  | m/z    | Gene names |
|-----------------------------------|-------|----------|--------|--------|------------|
| 20141014_fract9_dyn_5ul_F1_01_588 | 30140 | TOF; CID | 111.95 | 529.28 | SLC9A8     |

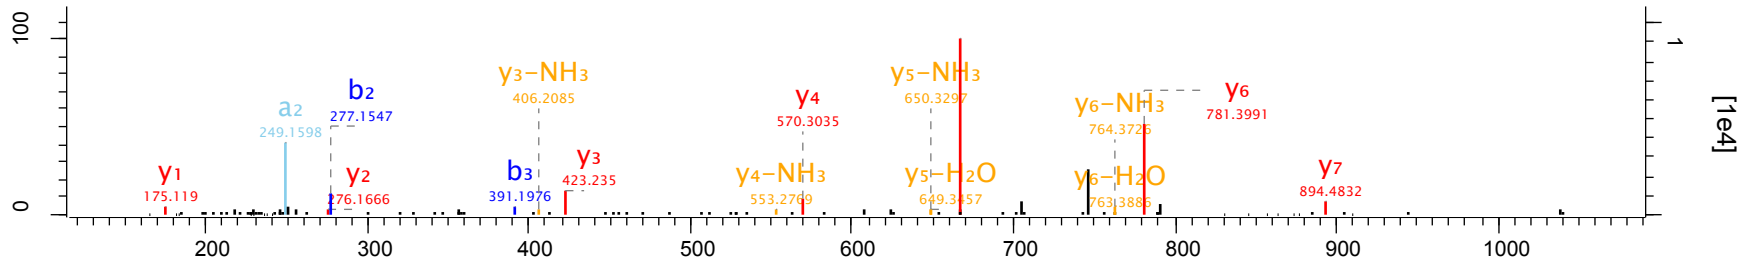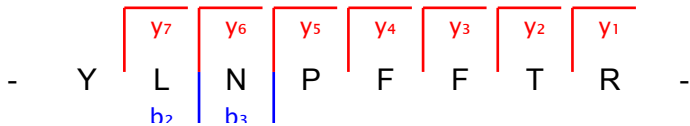

| Raw file                          | Scan  | Method   | Score  | m/z    | Gene names |
|-----------------------------------|-------|----------|--------|--------|------------|
| 20141014_fract9_dyn_5ul_F1_01_588 | 30511 | TOF; CID | 108.43 | 624.86 | RITA1      |

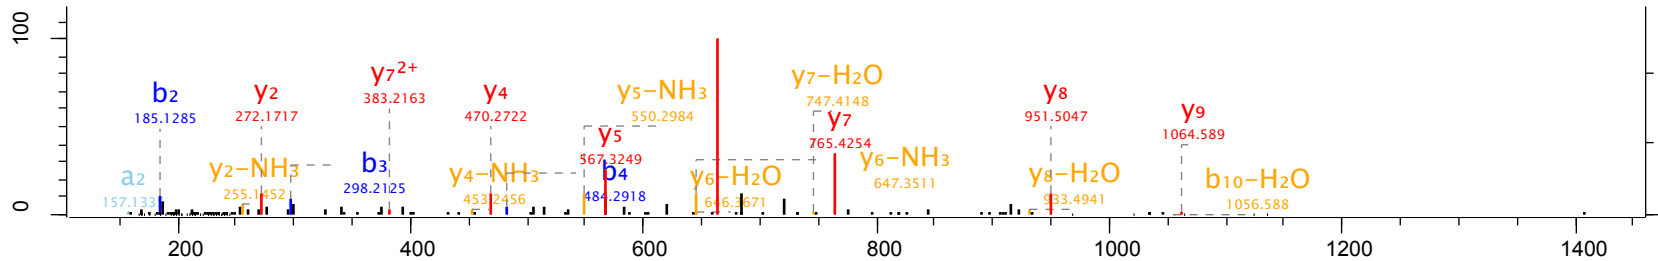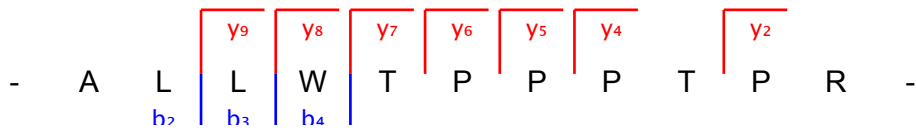

[1e4]

Raw file

20141014\_fract9\_dyn\_5ul\_F1\_01\_588

Scan

31463

Method

TOF; CID

Score

86.8

m/z

765.36

Gene names

CNIH4

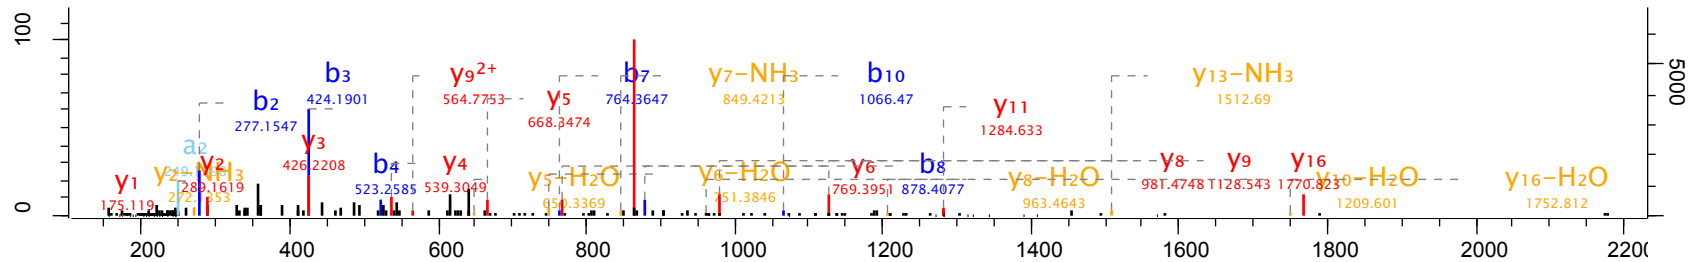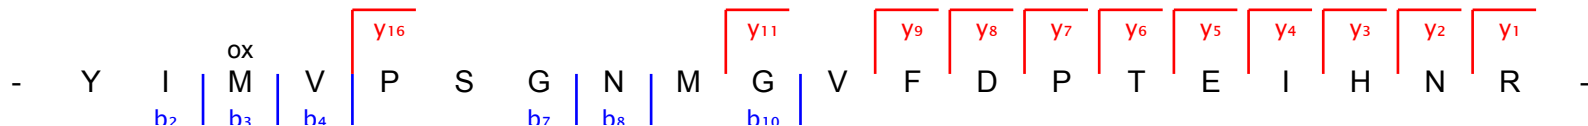

Raw file

20141014\_fract9\_dyn\_5ul\_F1\_01\_588

Scan

31846

Method

TOF; CID

Score

50.9

m/z

764.84

Gene names

ATF4

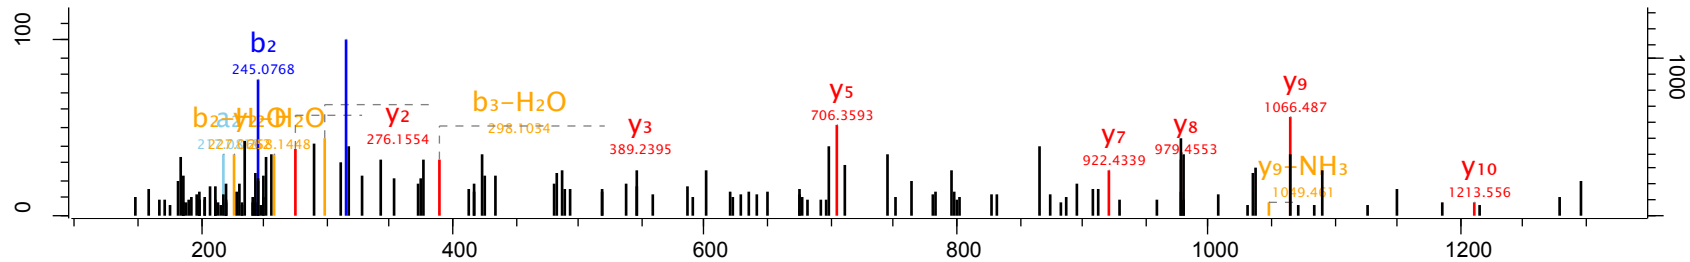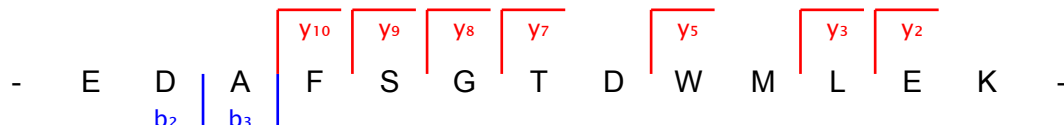

Raw file

20141014\_fract9\_dyn\_5ul\_F1\_01\_588

Scan

32555

Method

TOF; CID

Score

53.45

m/z

757.67

Gene names

EFNA5

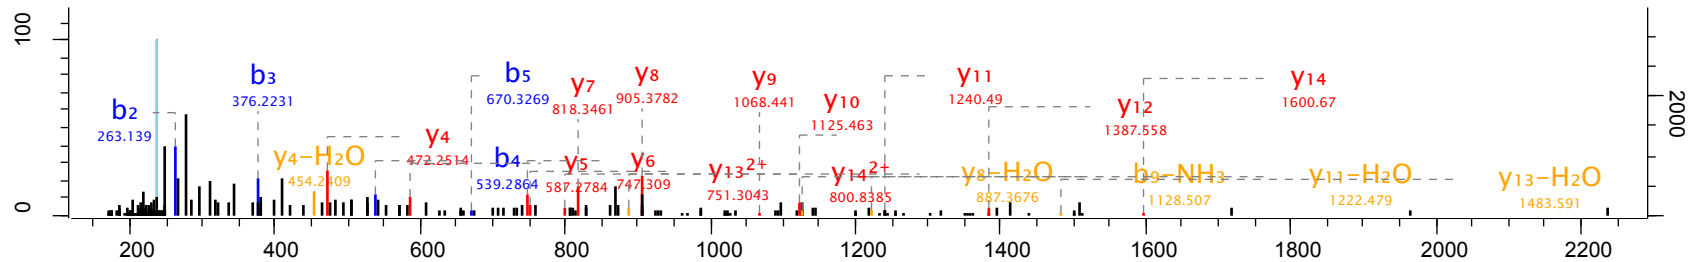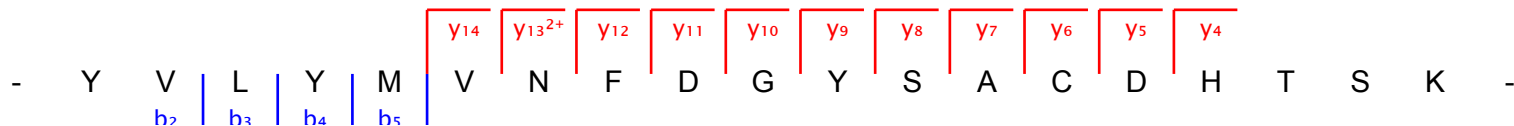

Raw file

20141014\_fract9\_dyn\_5ul\_F1\_01\_588

Scan

36625

Method

TOF; CID

Score

70.26

m/z

847.47

Gene names

MTERF2

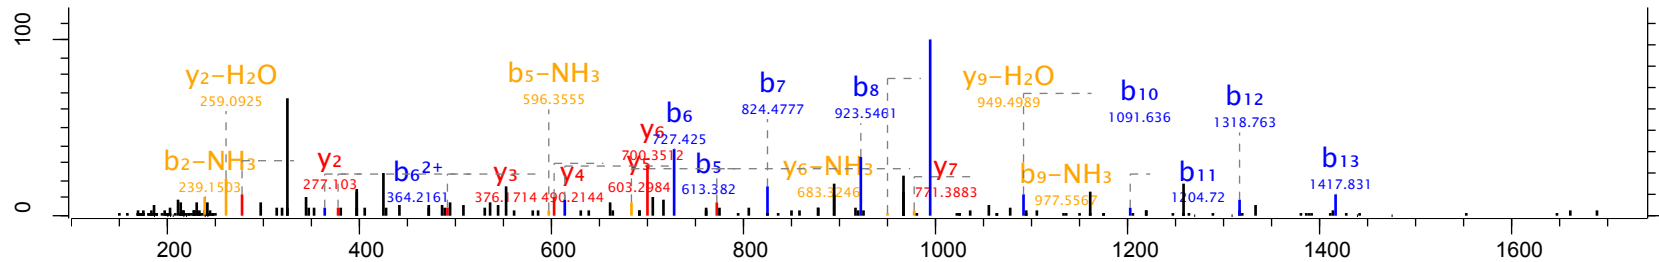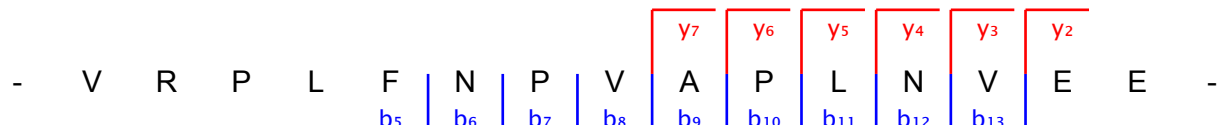



Raw file

20141014\_fract9\_dyn\_5ul\_F1\_01\_588

Scan

37674

Method

TOF; CID

Score

57.17

m/z

673.35

Gene names

PLAGL2

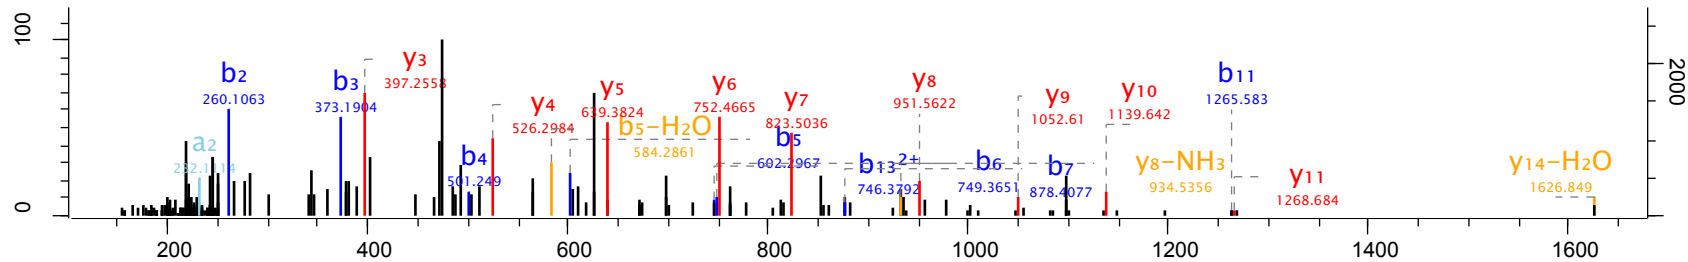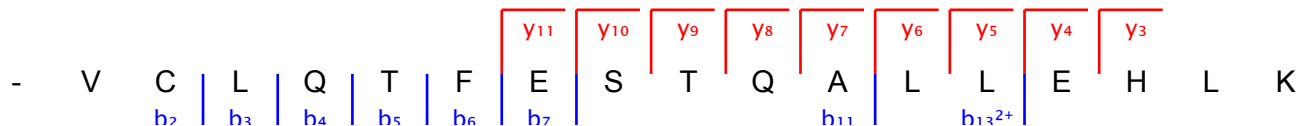

Raw file

20141014\_fract9\_dyn\_5ul\_F1\_01\_588

Scan

38231

Method

TOF; CID

Score

84.94

m/z

710.36

Gene names

KDELR1

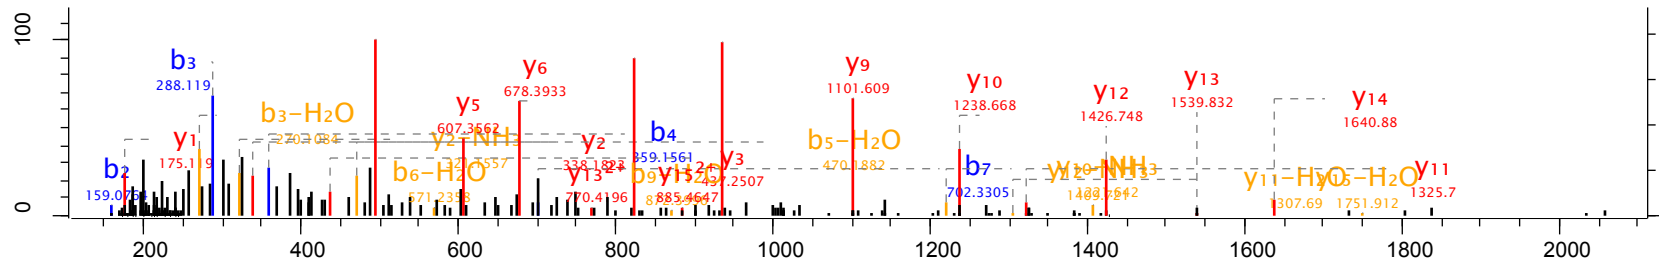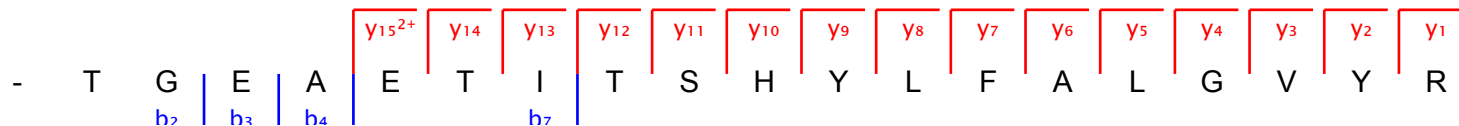

Raw file

20141014\_fract9\_dyn\_5ul\_F1\_01\_588

Scan

38402

Method

TOF; CID

Score

34.04

m/z

1150.89

Gene names

ZAN

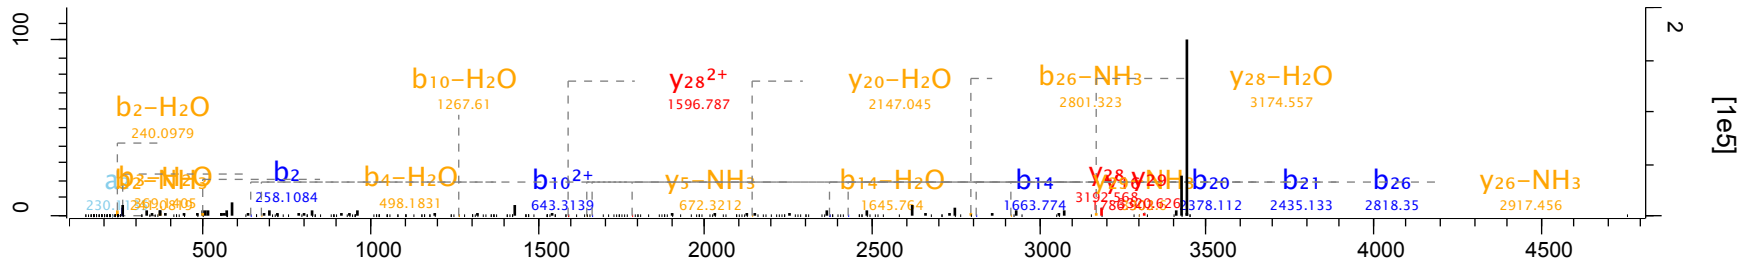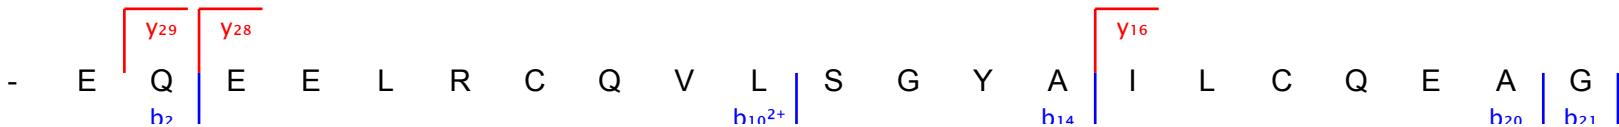

Raw file

20141014\_fract9\_dyn\_5ul\_F1\_01\_588

Scan

38564

Method

TOF; CID

Score

31.29

m/z

969.7

Gene names

CDC42SE1

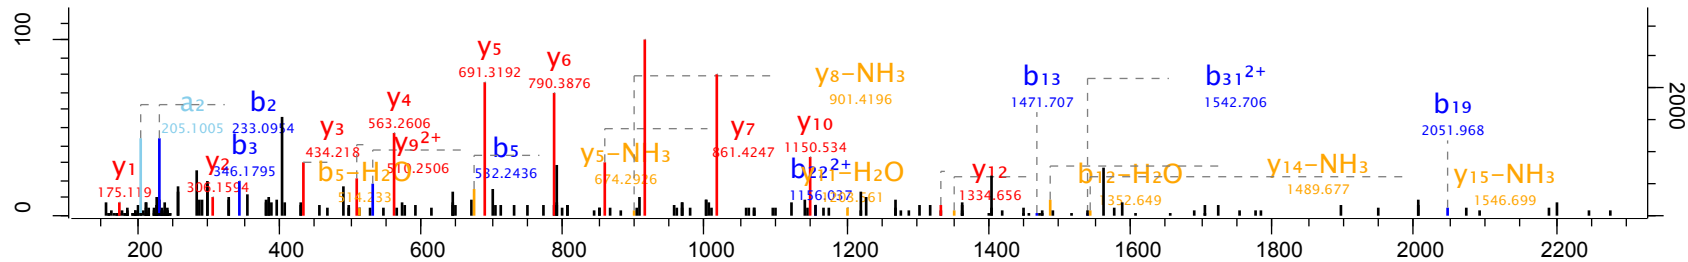

- T M I G E P M N F V H L T H I G S G E M G

b<sub>2</sub> | b<sub>3</sub> | b<sub>5</sub> | b<sub>13</sub> | b<sub>19</sub>

Raw file

20141014\_fract9\_dyn\_5ul\_F1\_01\_588

Scan

39519

Method

TOF; CID

Score

75.02

m/z

836.94

Gene names

ZNF273

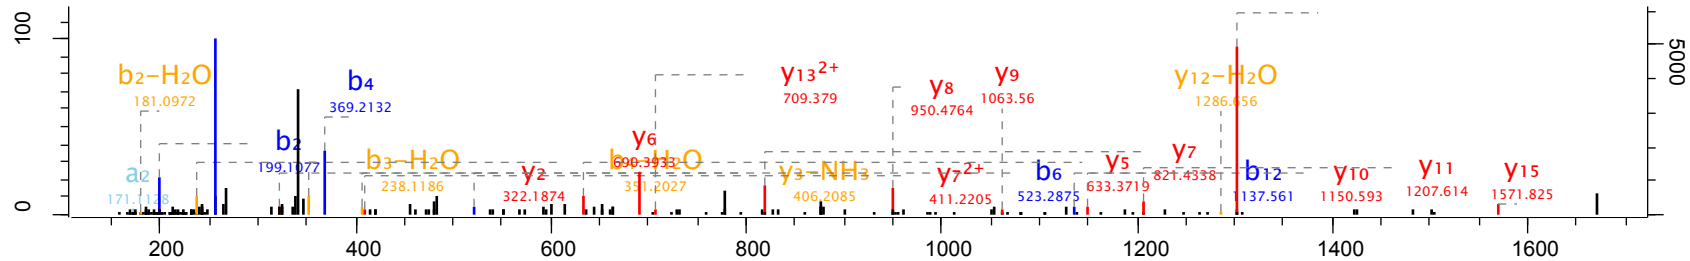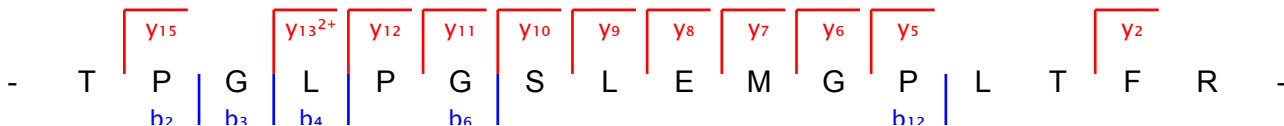

Raw file

20141014\_fract10\_dyn\_5ul\_F2\_01\_589

Scan

4168

Method

TOF; CID

Score

64.1

m/z

465.23

Gene names

CRAT

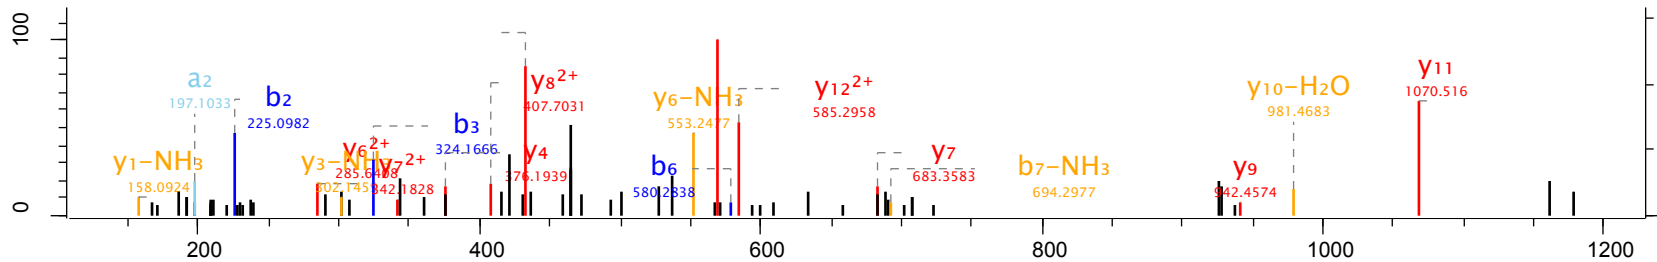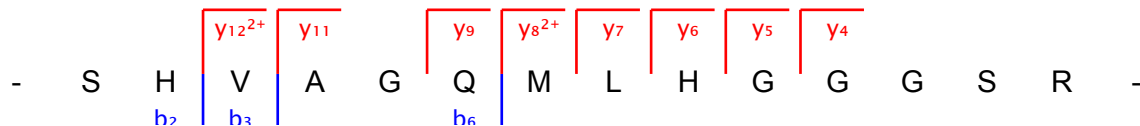

| Raw file                           | Scan  | Method   | Score | m/z    | Gene names |
|------------------------------------|-------|----------|-------|--------|------------|
| 20141014_fract10_dyn_5ul_F2_01_589 | 11667 | TOF; CID | 91.09 | 529.31 | RPGRIP1    |

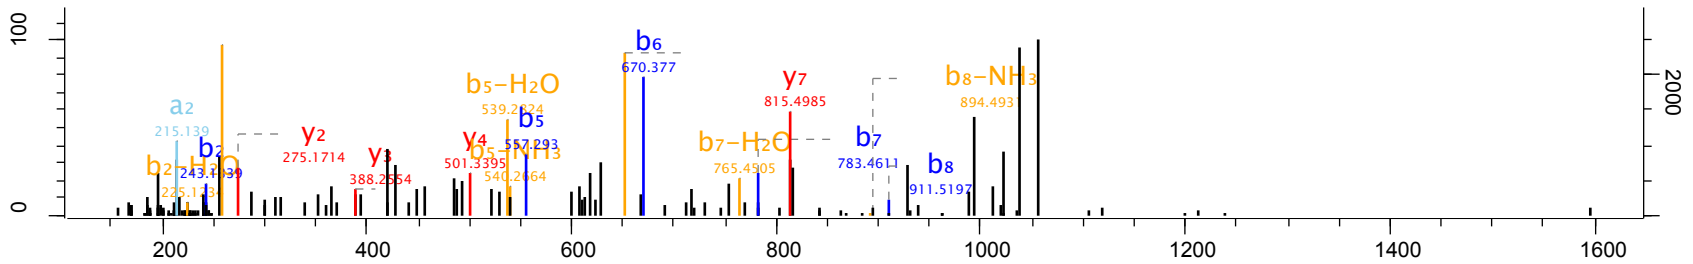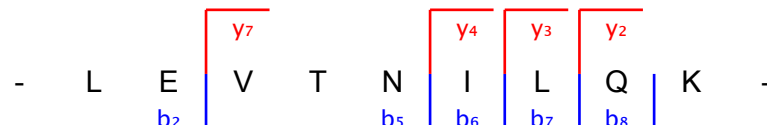

Raw file

20141014\_fract10\_dyn\_5ul\_F2\_01\_589

Scan

16187

Method

TOF; CID

Score

86.46

m/z

432.9

Gene names

NDUFC1

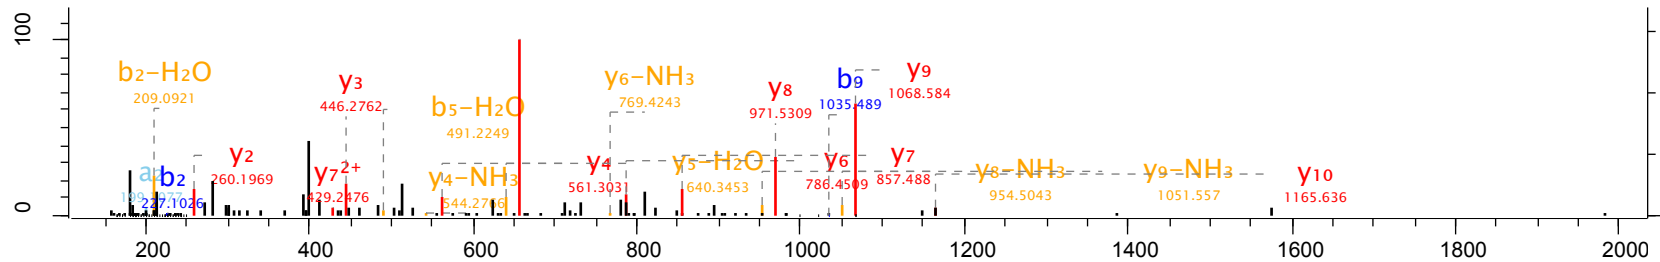

[1e4]

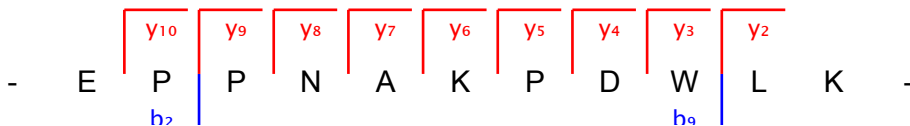



| Raw file                           | Scan  | Method   | Score | m/z    | Gene names |
|------------------------------------|-------|----------|-------|--------|------------|
| 20141014_fract10_dyn_5ul_F2_01_589 | 19145 | TOF; CID | 75.82 | 421.23 | GNG11      |

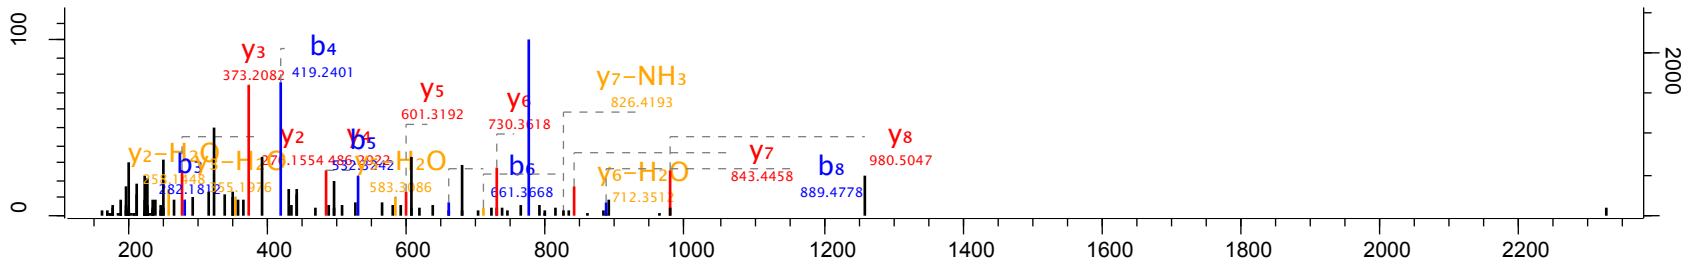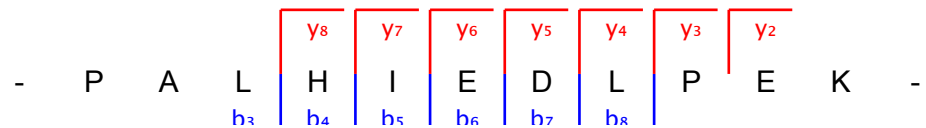

Raw file

20141014\_fract10\_dyn\_5ul\_F2\_01\_589

Scan

22968

Method

TOF; CID

Score

91.7

m/z

688.83

Gene names

SMIM4

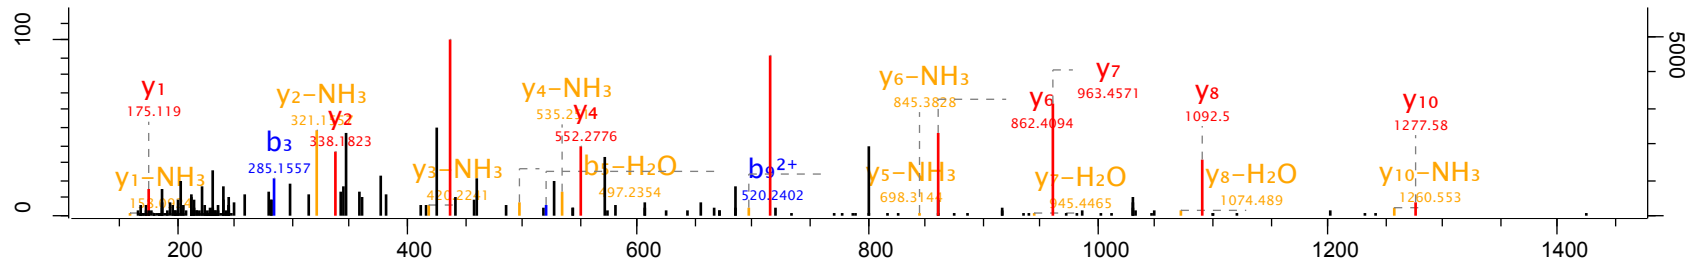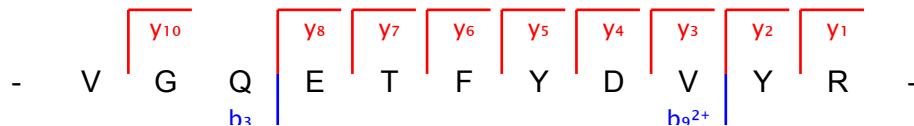

Raw file

20141014\_fract10\_dyn\_5ul\_F2\_01\_589

Scan

23140

Method

TOF; CID

Score

71.08

m/z

617.3

Gene names

TMEM104

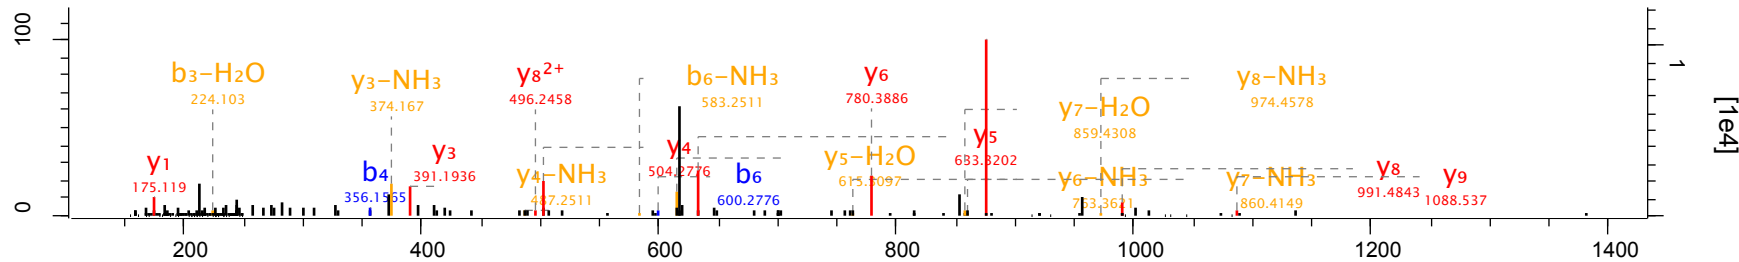

- G S P N P F E I T D R -

Fragmentation sites are indicated by brackets above the sequence, labeled y1 through y9. The b4 and b6 labels are positioned below the N and F residues, respectively.

| Raw file                           | Scan  | Method   | Score | m/z    | Gene names |
|------------------------------------|-------|----------|-------|--------|------------|
| 20141014_fract10_dyn_5ul_F2_01_589 | 26607 | TOF; CID | 74.92 | 558.32 | STC2       |

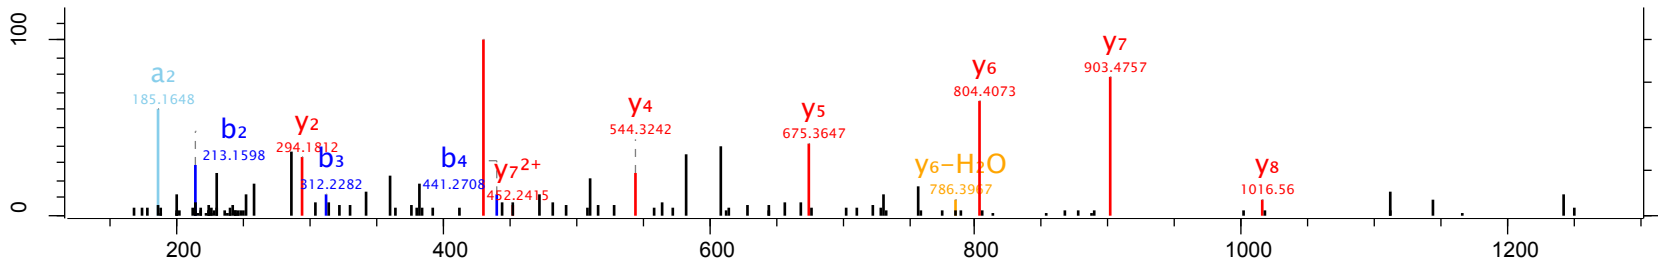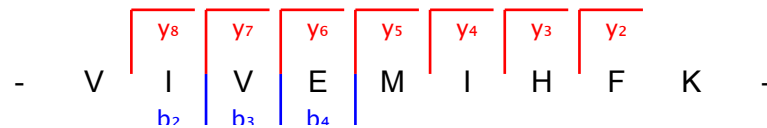

| Raw file                           | Scan  | Method   | Score | m/z    | Gene names |
|------------------------------------|-------|----------|-------|--------|------------|
| 20141014_fract10_dyn_5ul_F2_01_589 | 27475 | TOF; CID | 80.51 | 757.92 | C9orf91    |

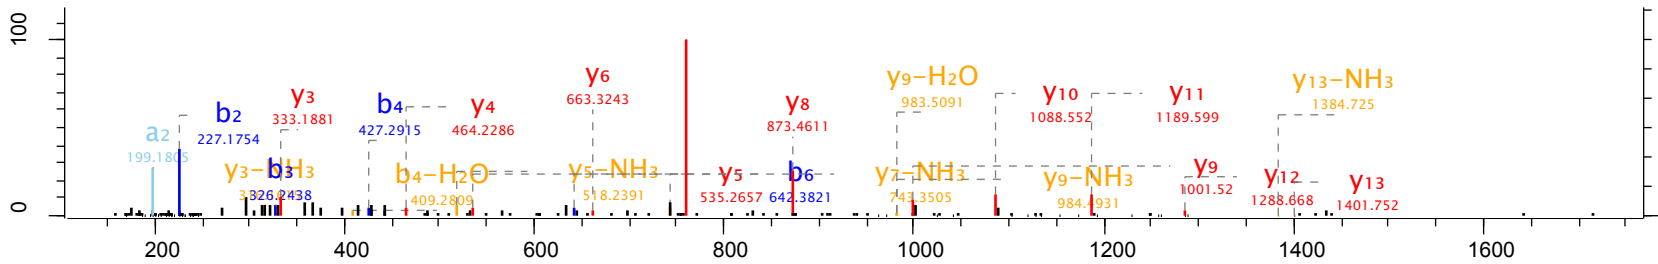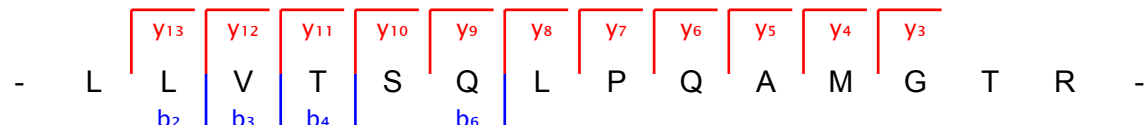

Raw file

20141014\_fract10\_dyn\_5ul\_F2\_01\_589

Scan

27642

Method

TOF; CID

Score

118.22

m/z

894.45

Gene names

DYNC111

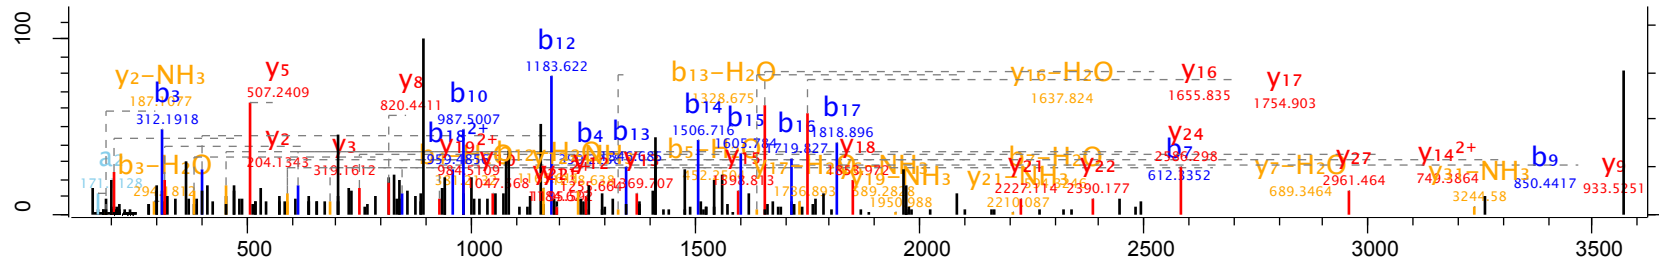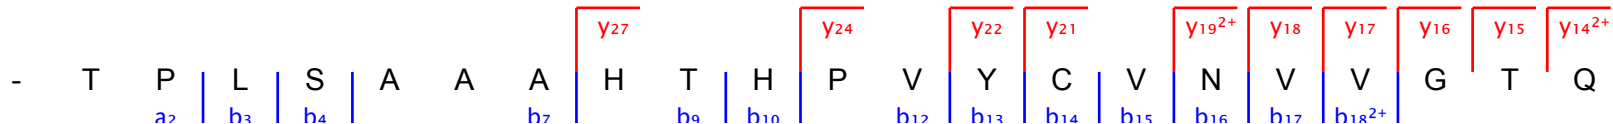

Raw file

20141014\_fract10\_dyn\_5ul\_F2\_01\_589

Scan

32218

Method

TOF; CID

Score

170.77

m/z

928.44

Gene names

MAPK1IP1L

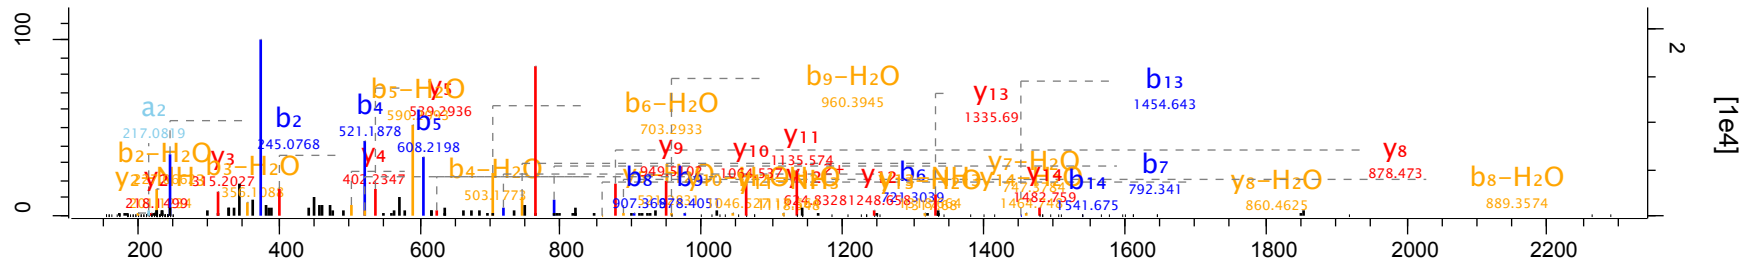

ac

S

D

E

F

S

L

A

D

A

L

P

E

H

S

P

A

K

-

b<sub>2</sub>b<sub>3</sub>b<sub>4</sub>b<sub>5</sub>b<sub>6</sub>b<sub>7</sub>b<sub>8</sub>b<sub>9</sub>b<sub>13</sub>b<sub>14</sub>y<sub>14</sub>y<sub>13</sub>y<sub>12</sub>y<sub>11</sub>y<sub>10</sub>y<sub>9</sub>y<sub>8</sub>y<sub>7</sub>y<sub>5</sub>y<sub>4</sub>y<sub>3</sub>y<sub>2</sub>

Raw file

20141014\_fract10\_dyn\_5ul\_F2\_01\_589

Scan

33291

Method

TOF; CID

Score

140.48

m/z

629.84

Gene names

GTF2A1; HIST1H4F

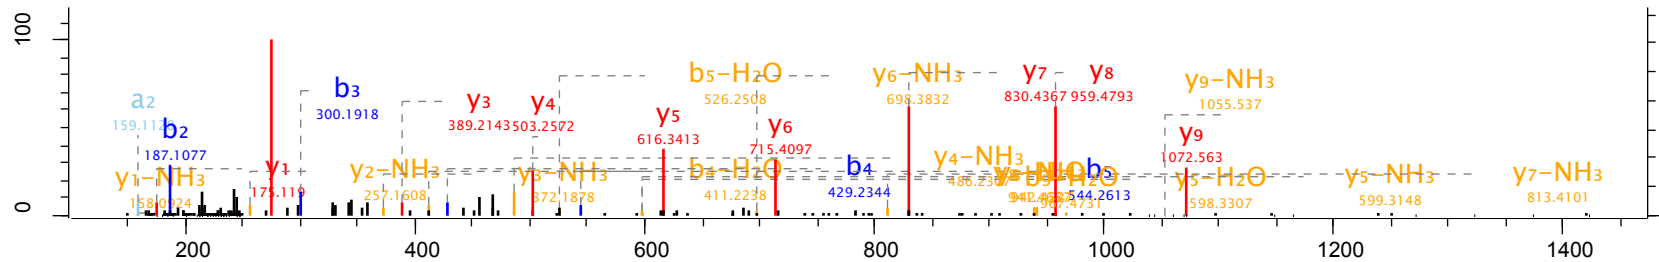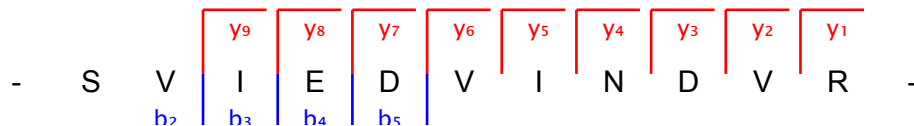



Raw file

20141014\_fract10\_dyn\_5ul\_F2\_01\_589

Scan

35403

Method

TOF; CID

Score

68.24

m/z

642.67

Gene names

SLC25A26

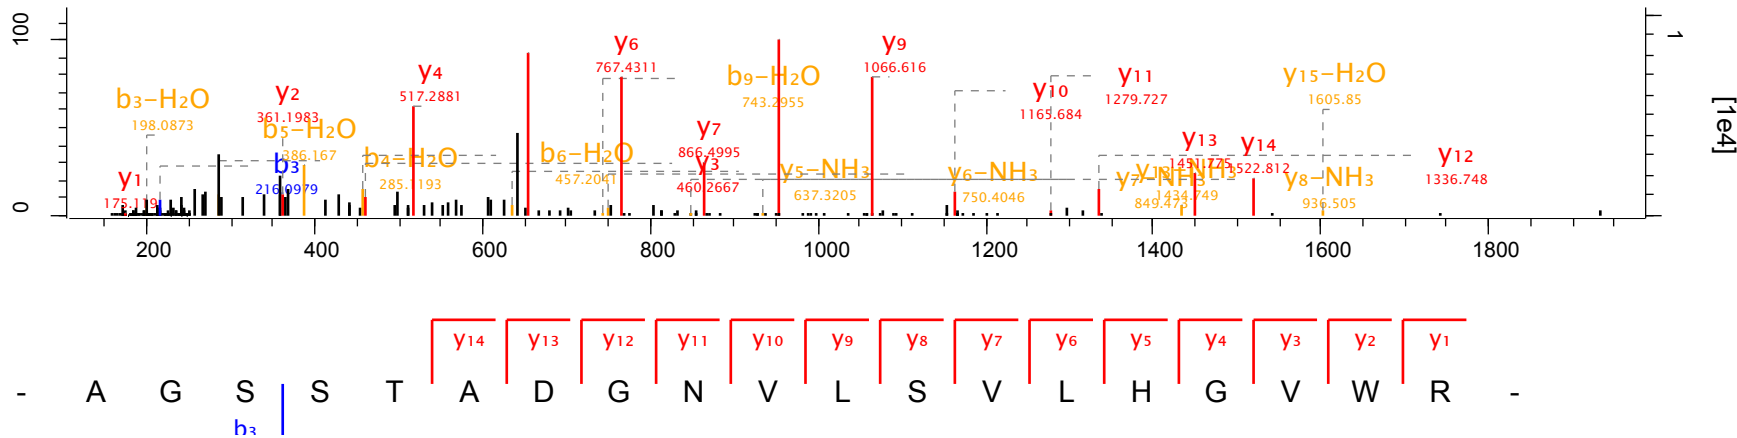

Raw file

Scan

Method

Score

m/z

Gene names

20141014\_fract10\_dyn\_5ul\_F2\_01\_589

37241

TOF; CID

118.37

1351.63

SMAGP

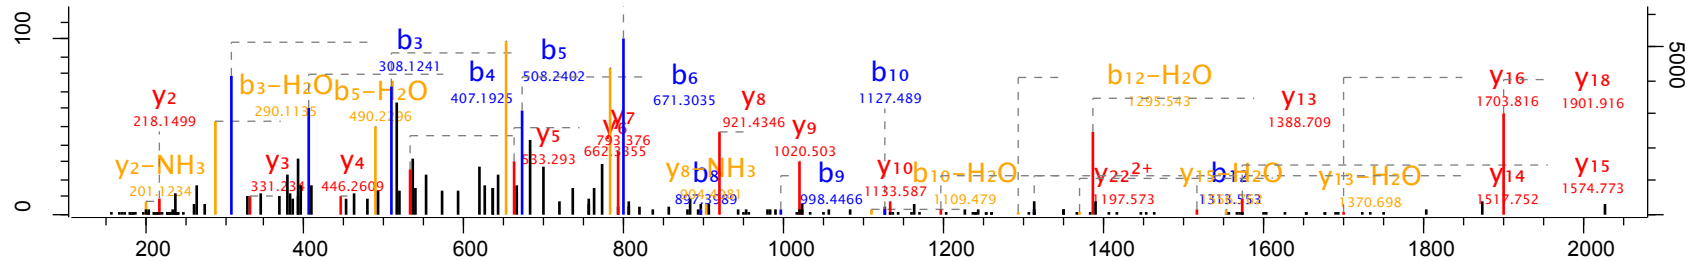

- G S Y V T Y E P T E G E P S A I V Q M E S  
 b<sub>3</sub> b<sub>4</sub> b<sub>5</sub> b<sub>6</sub> b<sub>7</sub> b<sub>8</sub> b<sub>9</sub> b<sub>10</sub> b<sub>12</sub> y<sub>22</sub><sup>2+</sup> y<sub>18</sub> y<sub>16</sub> y<sub>15</sub> y<sub>14</sub> y<sub>13</sub> y<sub>10</sub> y<sub>9</sub> y<sub>8</sub> y<sub>7</sub> y<sub>6</sub> y<sub>5</sub>

Raw file

20141014\_fract10\_dyn\_5ul\_F2\_01\_589

Scan

40719

Method

TOF; CID

Score

71.67

m/z

1098.52

Gene names

CNIH1

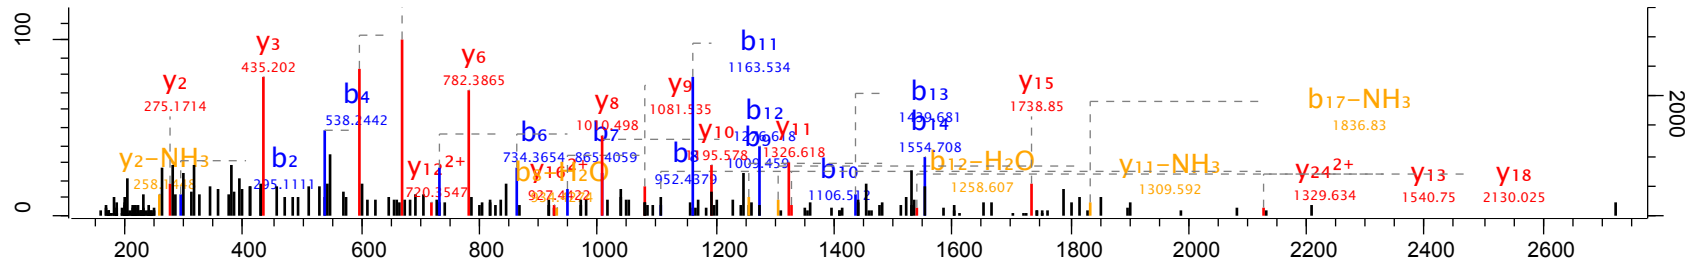

- Y M | S R | P V | M | S | G | P | G L | Y D | P T T | I M | N A  
   b<sub>2</sub> | b<sub>4</sub> | b<sub>6</sub> | b<sub>7</sub> | b<sub>8</sub> | b<sub>9</sub> | b<sub>10</sub> | b<sub>11</sub> | b<sub>12</sub> | b<sub>13</sub> | b<sub>14</sub>

y<sub>24</sub><sup>2+</sup> y<sub>18</sub> y<sub>16</sub><sup>2+</sup> y<sub>15</sub> y<sub>13</sub> y<sub>12</sub><sup>2+</sup> y<sub>11</sub> y<sub>10</sub> y<sub>9</sub>

Raw file

20141014\_fract10\_dyn\_5ul\_F2\_01\_589

Scan

41167

Method

TOF; CID

Score

36.55

m/z

1214.62

Gene names

DAZAP2

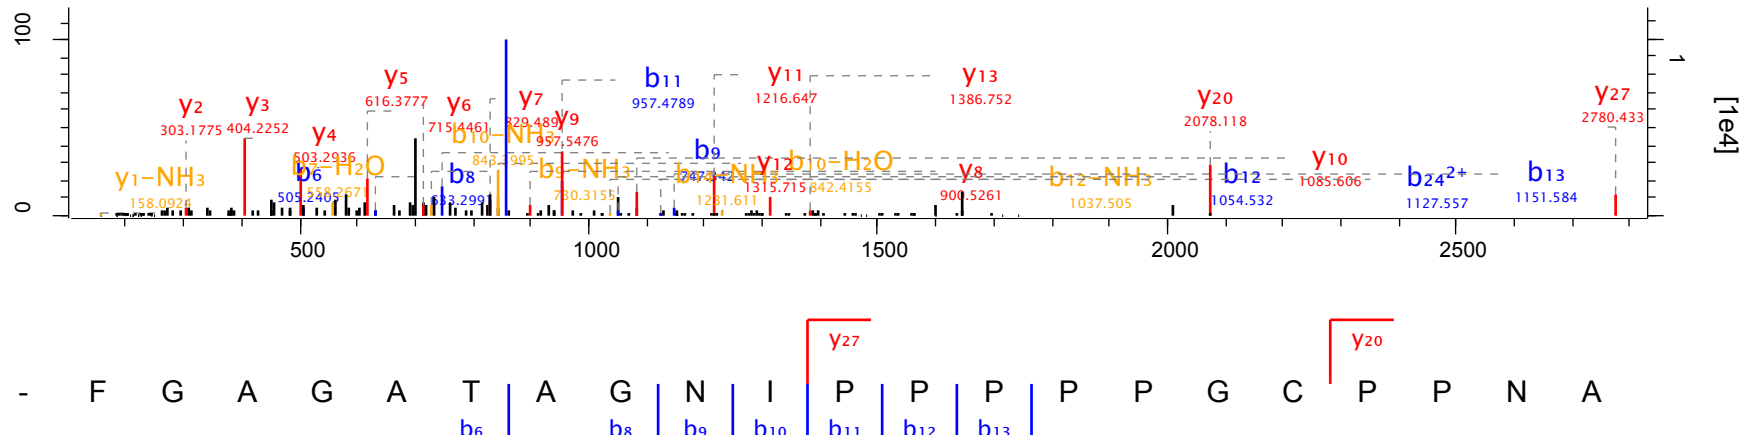

Raw file

20141014\_fract11\_dyn\_5ul\_F3\_01\_590

Scan

6157

Method

TOF; CID

Score

101.56

m/z

446.23

Gene names

NINJ1

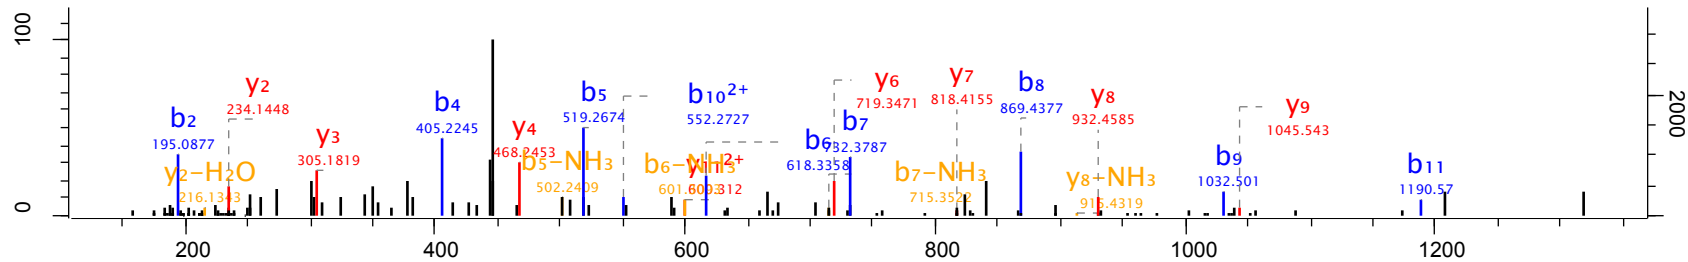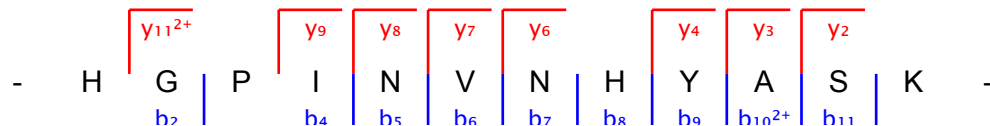

| Raw file                           | Scan  | Method   | Score | m/z    | Gene names |
|------------------------------------|-------|----------|-------|--------|------------|
| 20141014_fract11_dyn_5ul_F3_01_590 | 10827 | TOF; CID | 43.04 | 847.43 | C11orf49   |

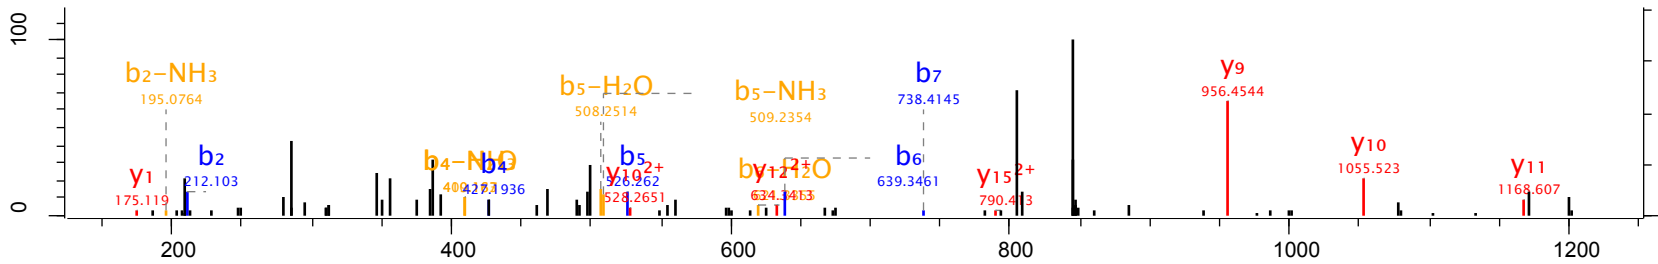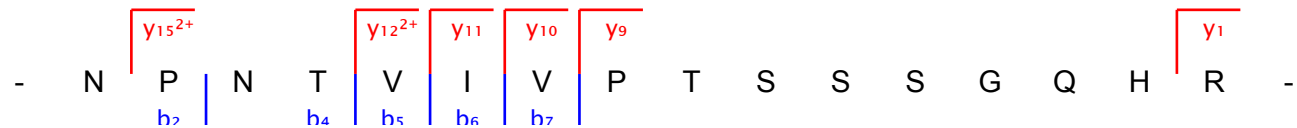

| Raw file                           | Scan  | Method   | Score | m/z   | Gene names |
|------------------------------------|-------|----------|-------|-------|------------|
| 20141014_fract11_dyn_5ul_F3_01_590 | 11461 | TOF; CID | 54.34 | 638.8 | PNMA3      |

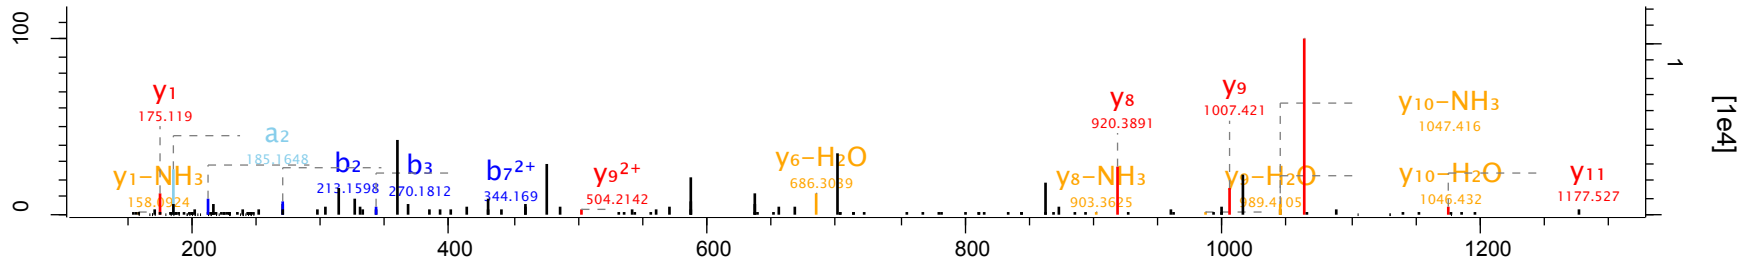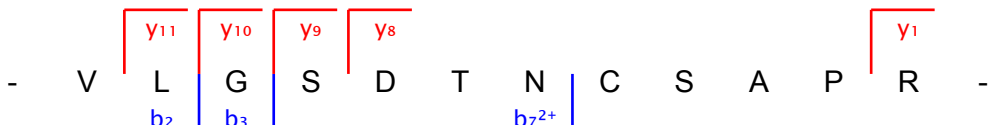

Raw file

20141014\_fract11\_dyn\_5ul\_F3\_01\_590

Scan

12591

Method

TOF; CID

Score

58.89

m/z

463.02

Gene names

ADAMTS15

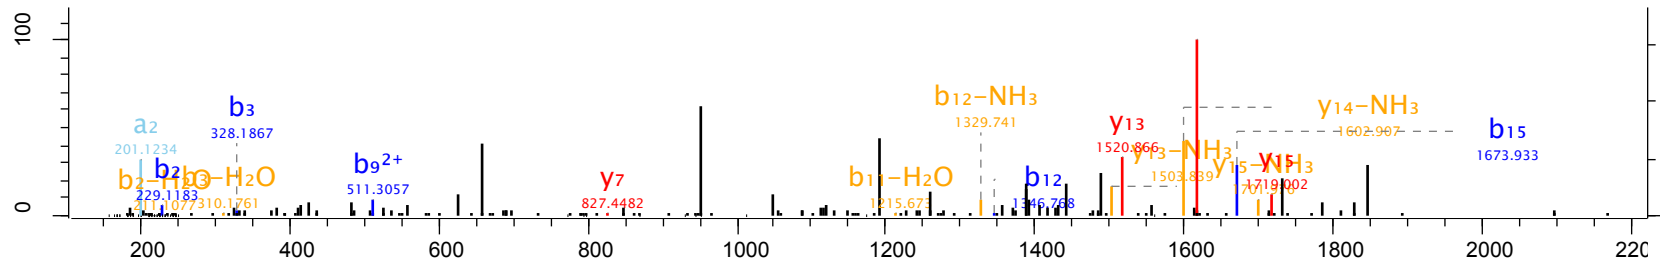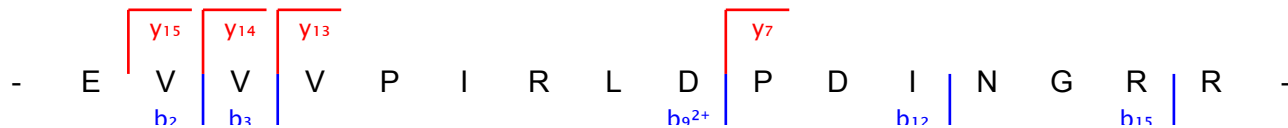



| Raw file                           | Scan  | Method   | Score  | m/z    | Gene names |
|------------------------------------|-------|----------|--------|--------|------------|
| 20141014_fract11_dyn_5ul_F3_01_590 | 14078 | TOF; CID | 152.34 | 497.26 | AKR1D1     |

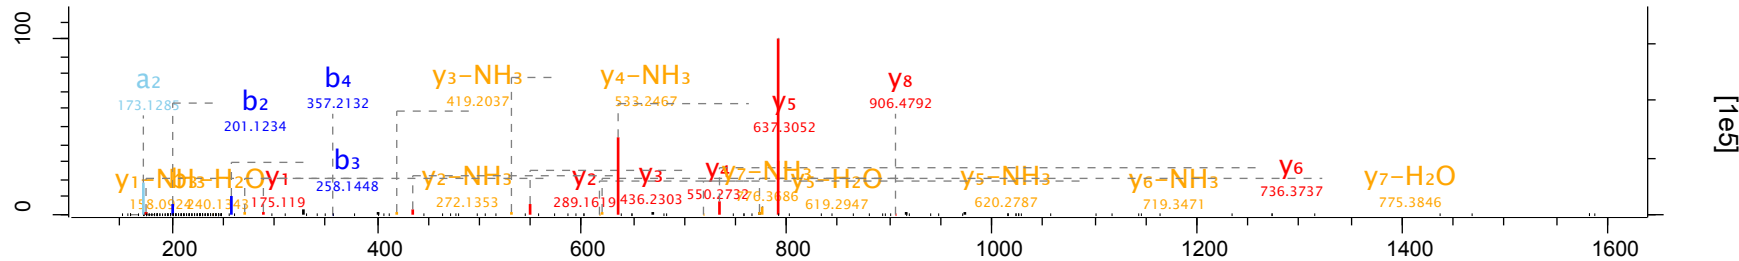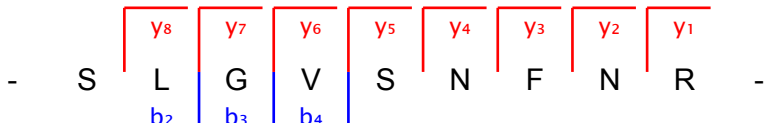

| Raw file                           | Scan  | Method   | Score  | m/z    | Gene names |
|------------------------------------|-------|----------|--------|--------|------------|
| 20141014_fract11_dyn_5ul_F3_01_590 | 15252 | TOF; CID | 101.43 | 490.26 | ZBED8      |

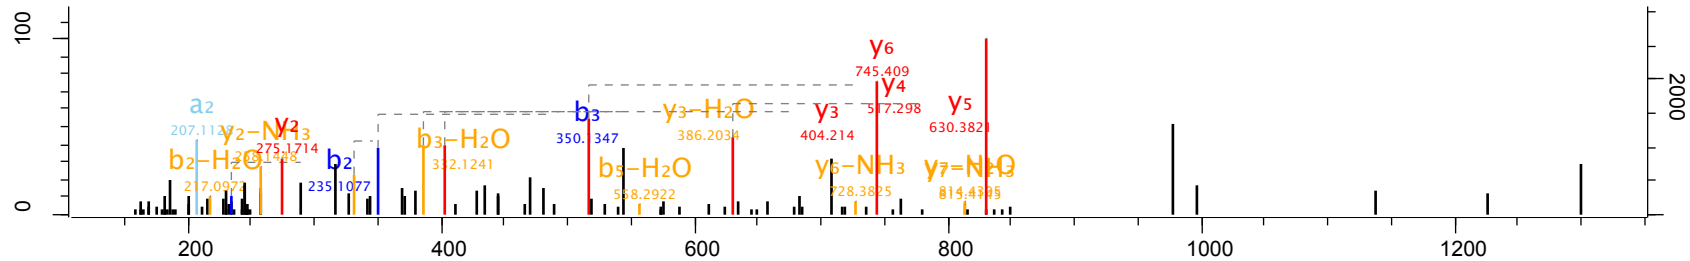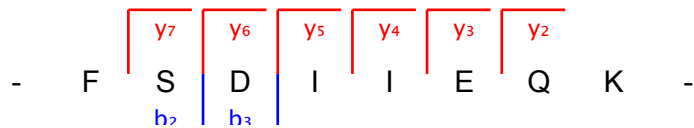

Raw file

20141014\_fract11\_dyn\_5ul\_F3\_01\_590

Scan

15492

Method

TOF; CID

Score

122.33

m/z

617.82

Gene names

SUMO2;SUMO3;SUMO4

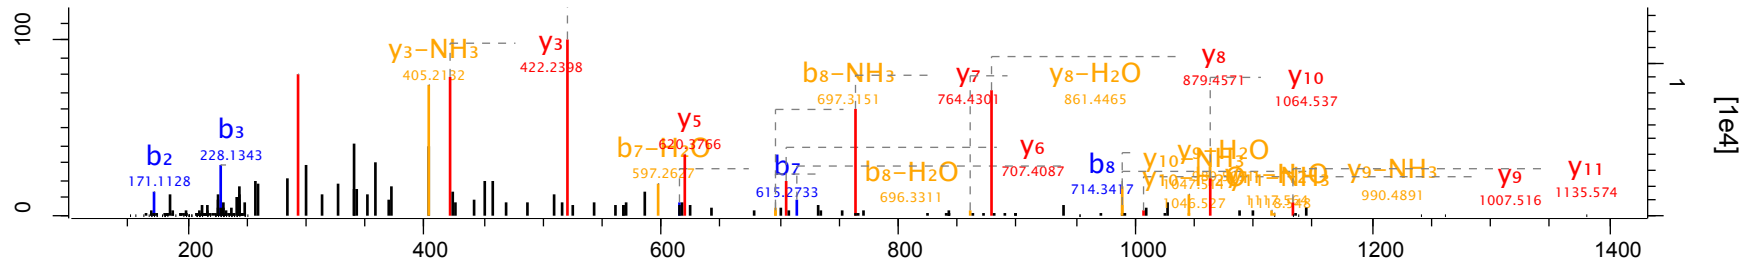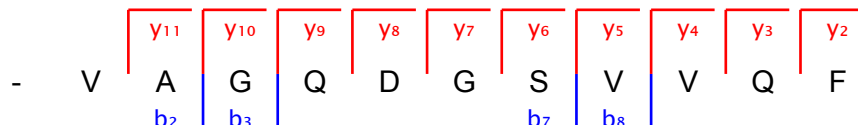

| Raw file                           | Scan  | Method   | Score | m/z    | Gene names |
|------------------------------------|-------|----------|-------|--------|------------|
| 20141014_fract11_dyn_5ul_F3_01_590 | 17495 | TOF; CID | 72.29 | 470.25 | CCDC88B    |

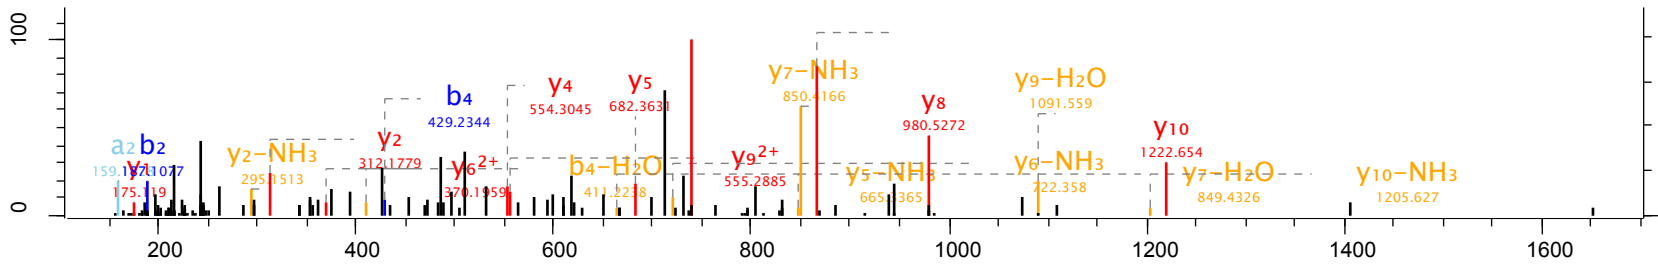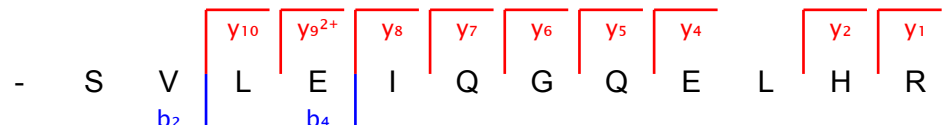

Raw file

20141014\_fract11\_dyn\_5ul\_F3\_01\_590

Scan

17959

Method

TOF; CID

Score

145.82

m/z

888.45

Gene names

NDUFV3

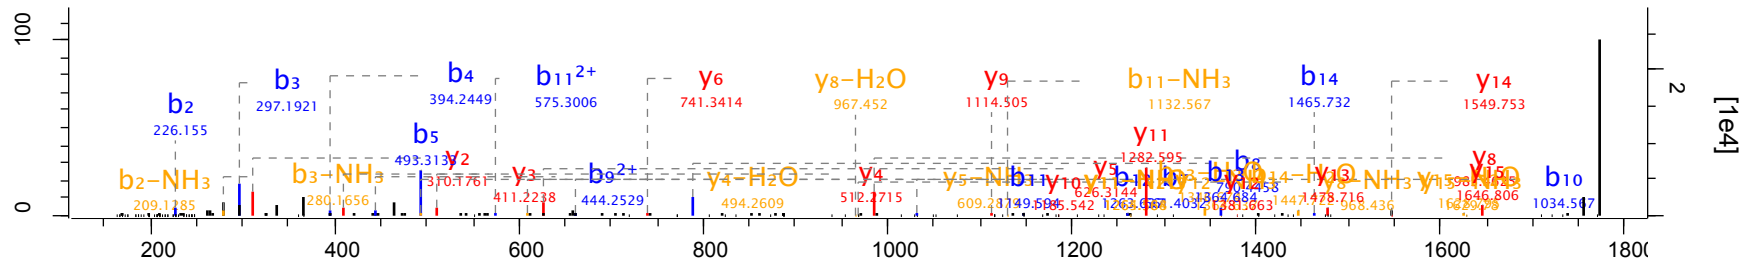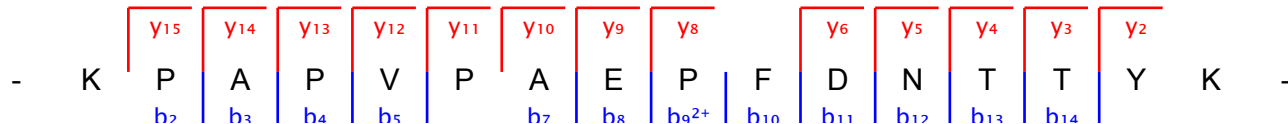

Raw file

20141014\_fract11\_dyn\_5ul\_F3\_01\_590

Scan

19980

Method

TOF; CID

Score

108.47

m/z

627.81

Gene names

SMIM19

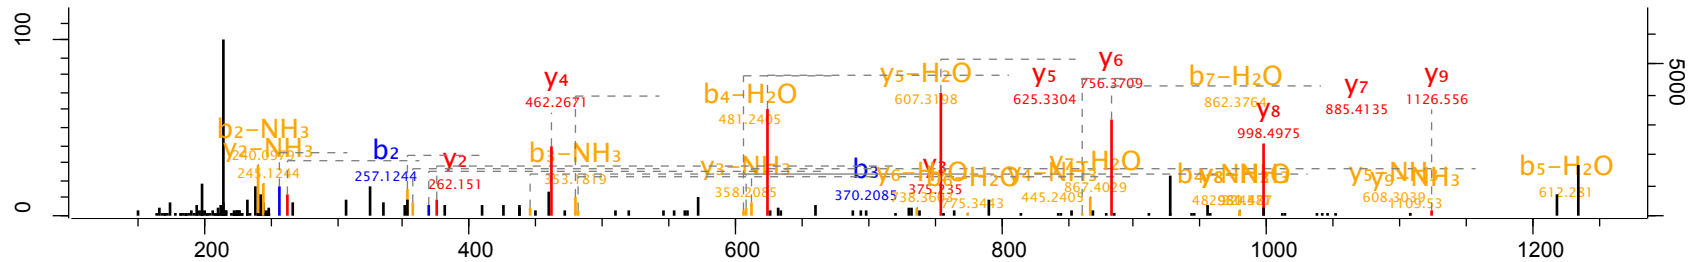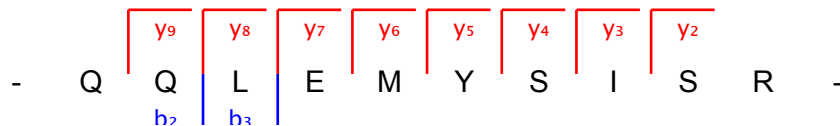

Raw file

20141014\_fract11\_dyn\_5ul\_F3\_01\_590

Scan

21302

Method

TOF; CID

Score

49.92

m/z

751

Gene names

POLR2K

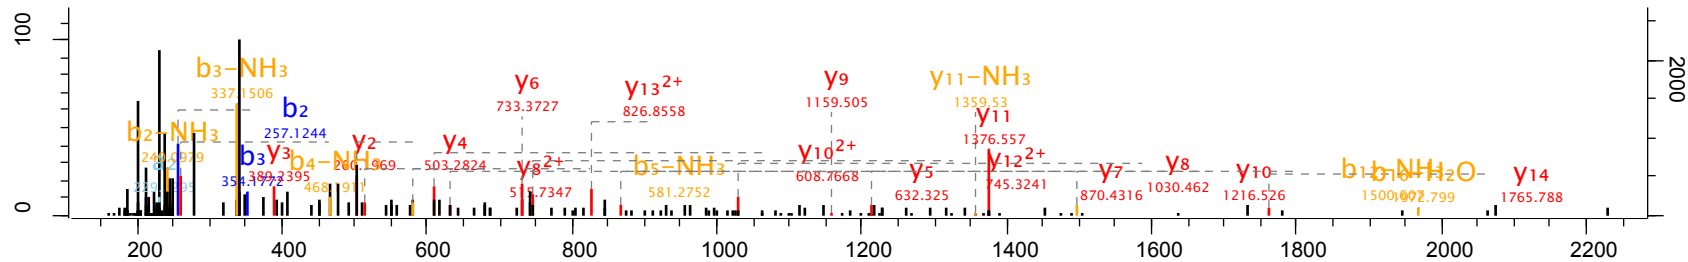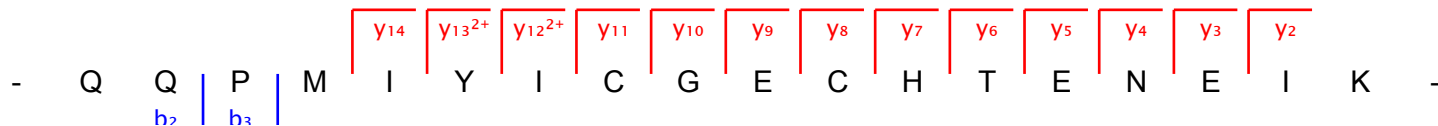

Raw file

20141014\_fract11\_dyn\_5ul\_F3\_01\_590

Scan

24147

Method

TOF; CID

Score

78.51

m/z

858.37

Gene names

MT-ND3

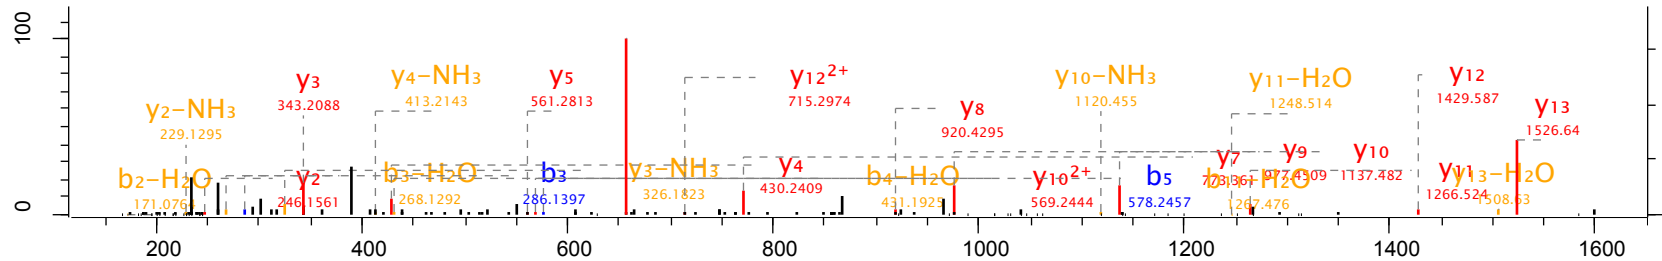

[1e4]

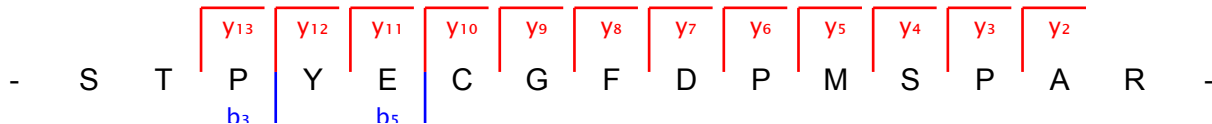



| Raw file                           | Scan  | Method   | Score  | m/z    | Gene names |
|------------------------------------|-------|----------|--------|--------|------------|
| 20141014_fract11_dyn_5ul_F3_01_590 | 24934 | TOF; CID | 107.32 | 497.28 | MT-ND1     |

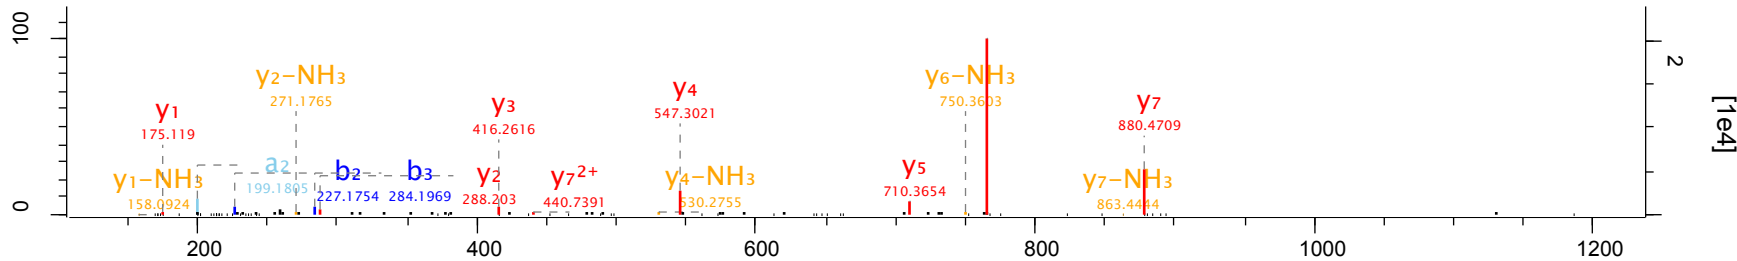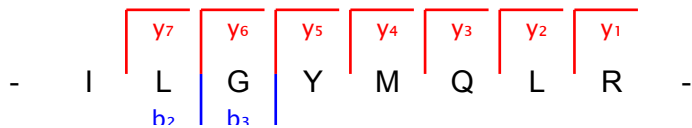

Raw file

20141014\_fract11\_dyn\_5ul\_F3\_01\_590

Scan

25502

Method

TOF; CID

Score

98.1

m/z

496.3

Gene names

BMP6

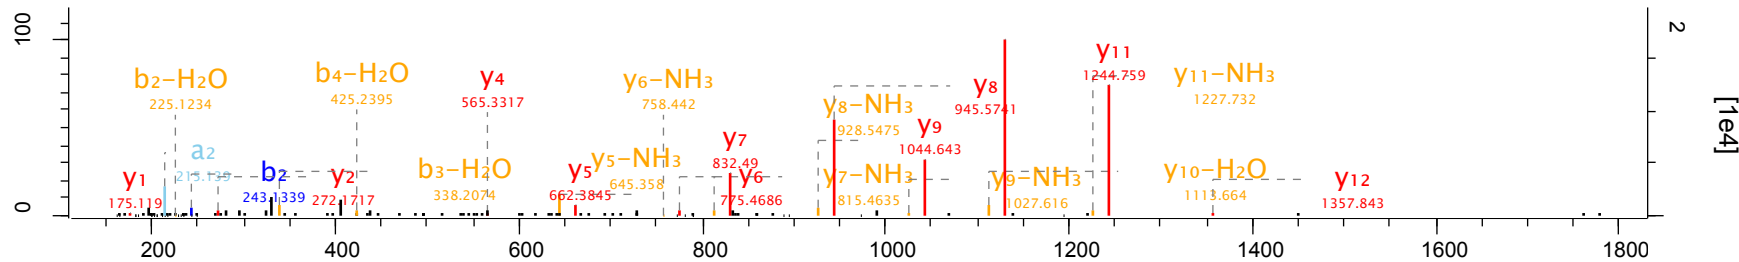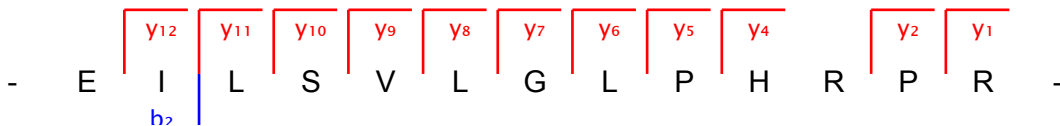

Raw file

20141014\_fract11\_dyn\_5ul\_F3\_01\_590

Scan

27185

Method

TOF; CID

Score

157.86

m/z

966.93

Gene names

CCDC23

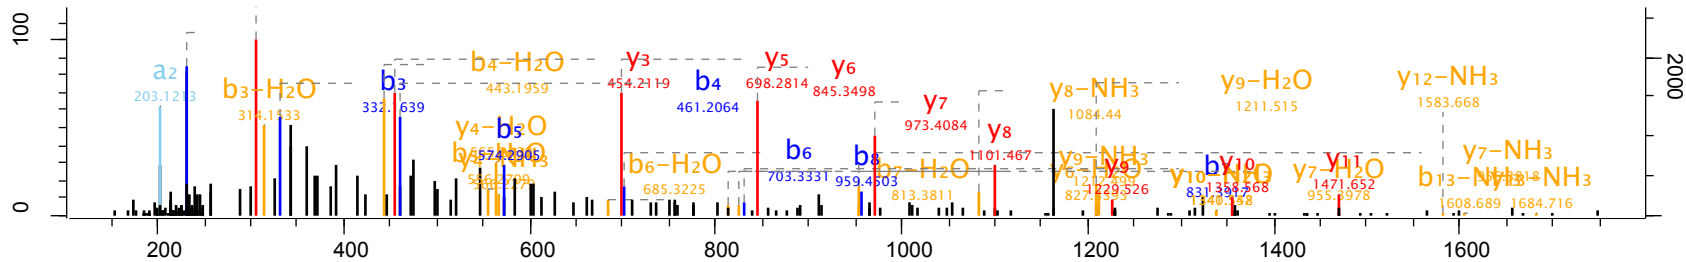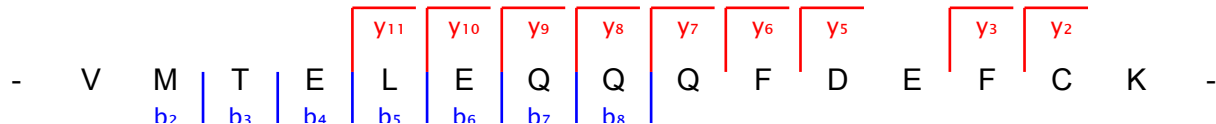

| Raw file                           | Scan  | Method   | Score  | m/z    | Gene names |
|------------------------------------|-------|----------|--------|--------|------------|
| 20141014_fract11_dyn_5ul_F3_01_590 | 28502 | TOF; CID | 120.46 | 452.77 | MYLK       |

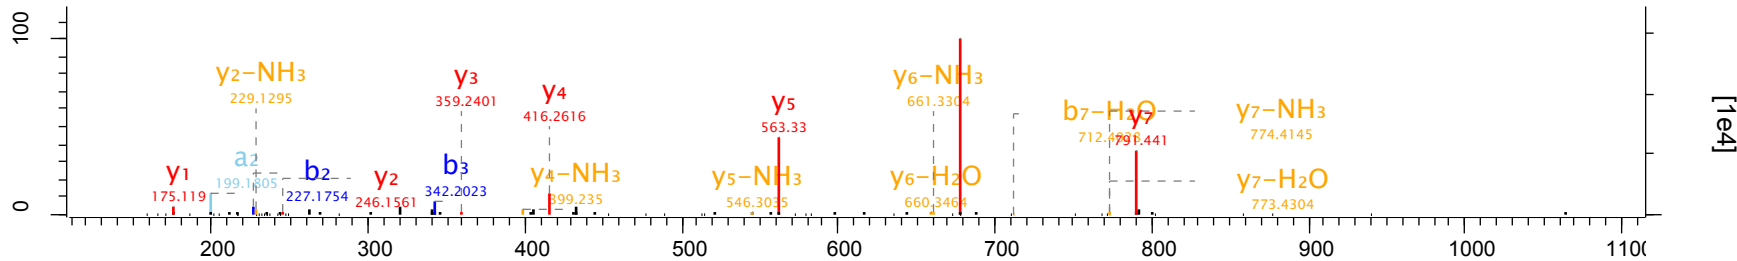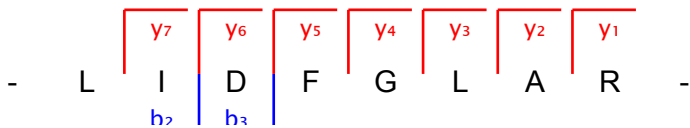

Raw file

20141014\_fract11\_dyn\_5ul\_F3\_01\_590

Scan

30360

Method

TOF; CID

Score

66.92

m/z

501.83

Gene names

PSCA

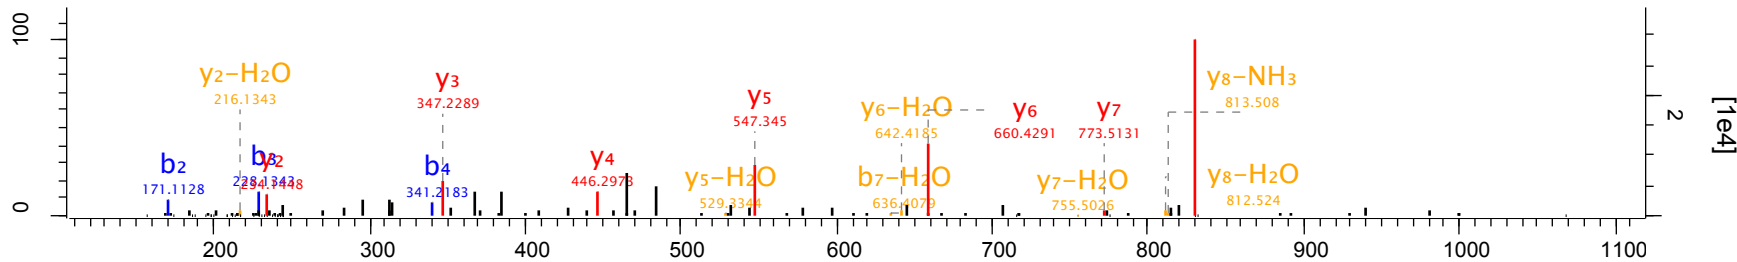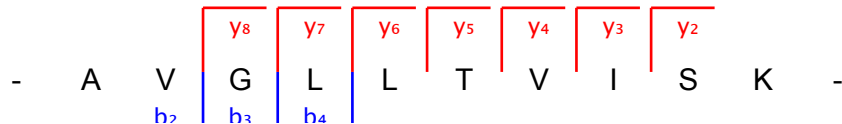

Raw file

20141014\_fract11\_dyn\_5ul\_F3\_01\_590

Scan

30862

Method

TOF; CID

Score

68.54

m/z

493.61

Gene names

TOR1AIP2

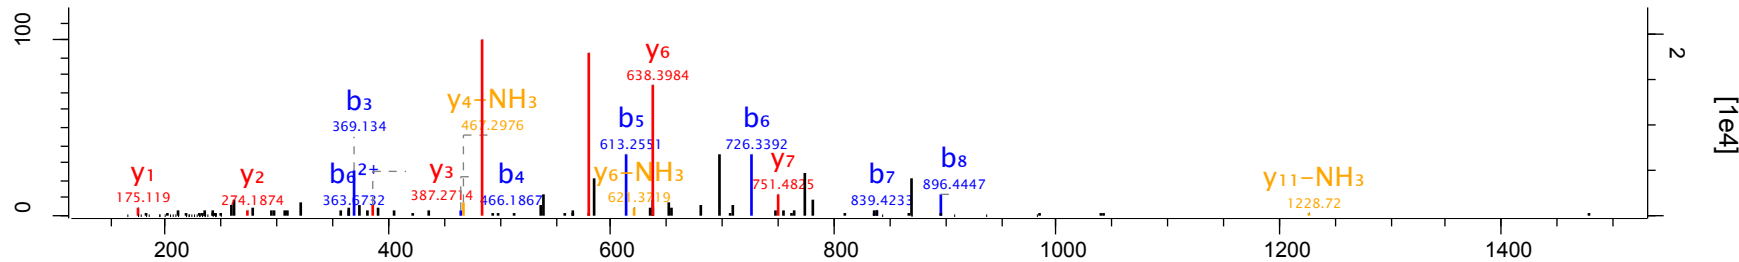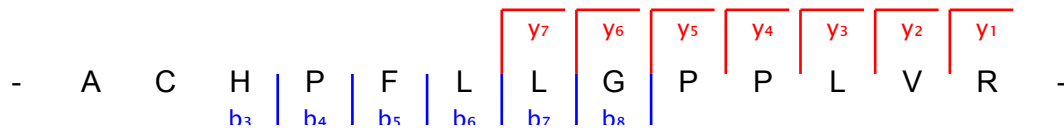

Raw file

20141014\_fract11\_dyn\_5ul\_F3\_01\_590

Scan

31303

Method

TOF; CID

Score

107.09

m/z

738.41

Gene names

TMEM56;TMEM56-RWDD3

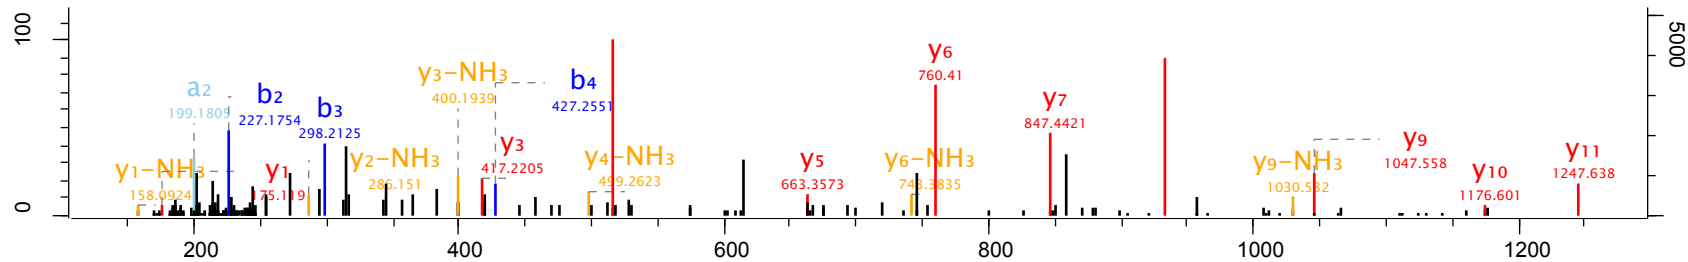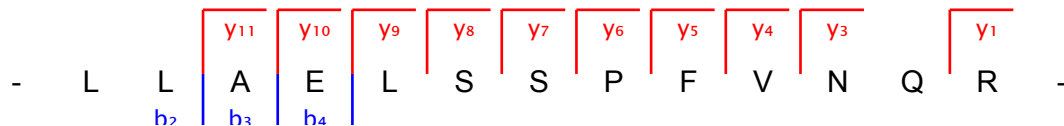

| Raw file                           | Scan  | Method   | Score  | m/z    | Gene names |
|------------------------------------|-------|----------|--------|--------|------------|
| 20141014_fract11_dyn_5ul_F3_01_590 | 35180 | TOF; CID | 120.46 | 560.32 | KDEL3      |

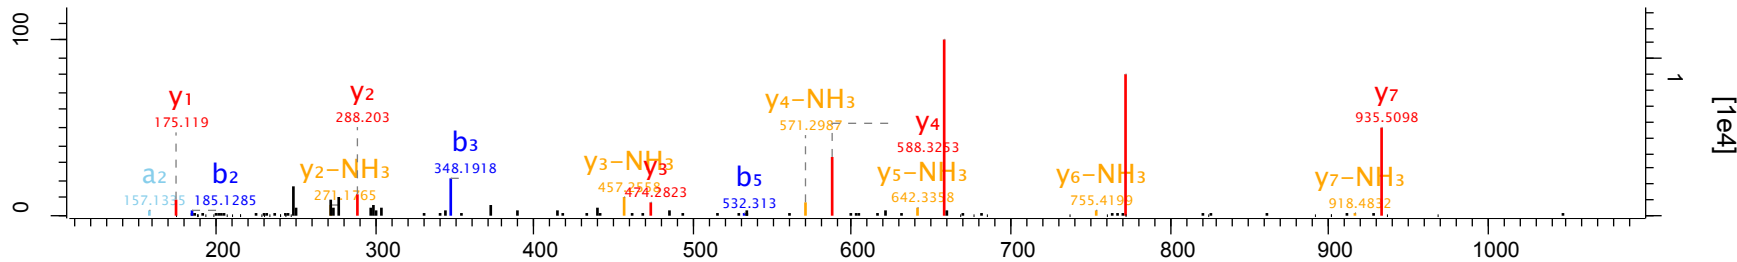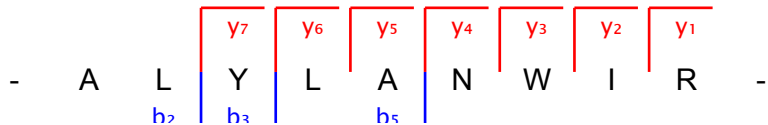



Raw file

20141014\_fract11\_dyn\_5ul\_F3\_01\_590

Scan

36573

Method

TOF; CID

Score

78.44

m/z

665.35

Gene names

DUSP19

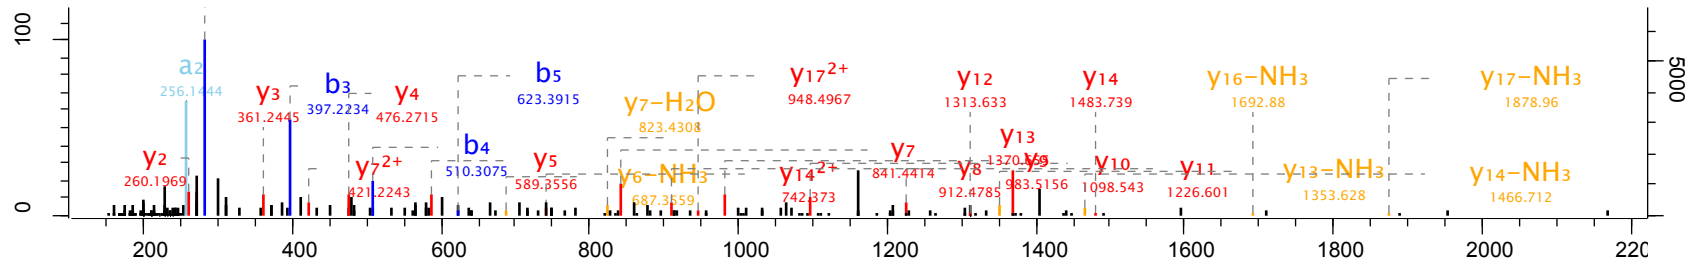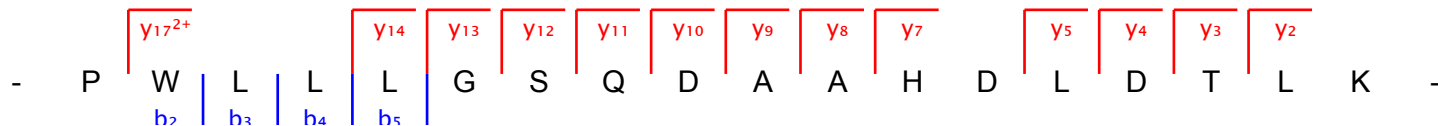

Raw file

20141014\_fract12\_dyn\_5ul\_F4\_01\_591

Scan

5855

Method

TOF; CID

Score

76.06

m/z

499.21

Gene names

ZNF580

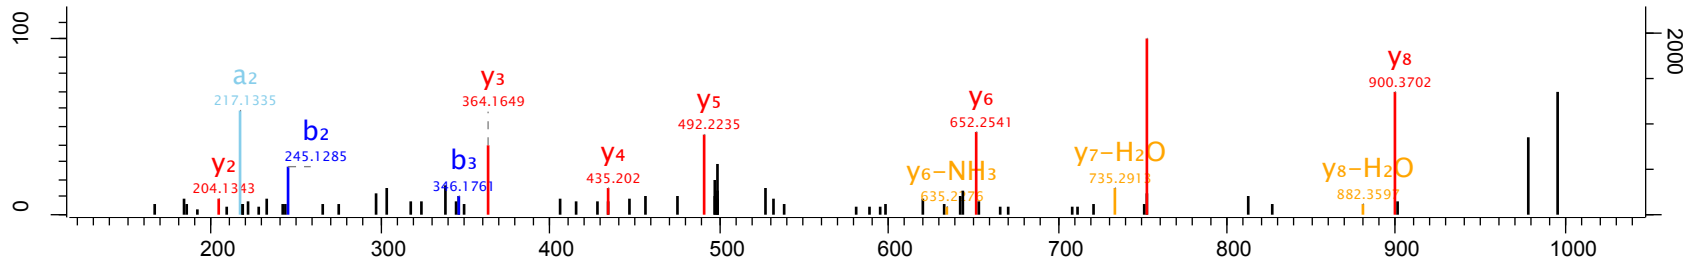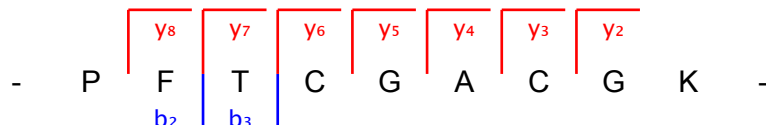

Raw file

20141014\_fract12\_dyn\_5ul\_F4\_01\_591

Scan

7555

Method

TOF; CID

Score

95.36

m/z

464.78

Gene names

TMEM185B;TMEM185A

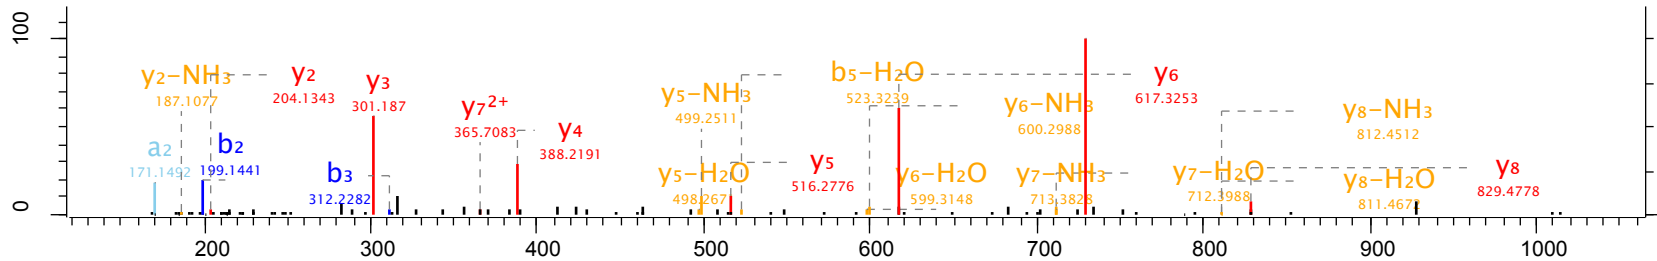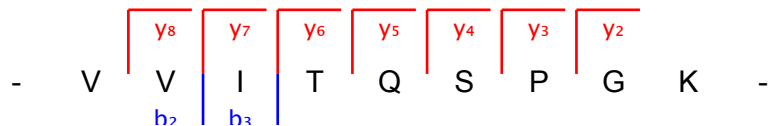

Raw file

20141014\_fract12\_dyn\_5ul\_F4\_01\_591

Scan

7804

Method

TOF; CID

Score

50.79

m/z

385.55

Gene names

TNRC6C

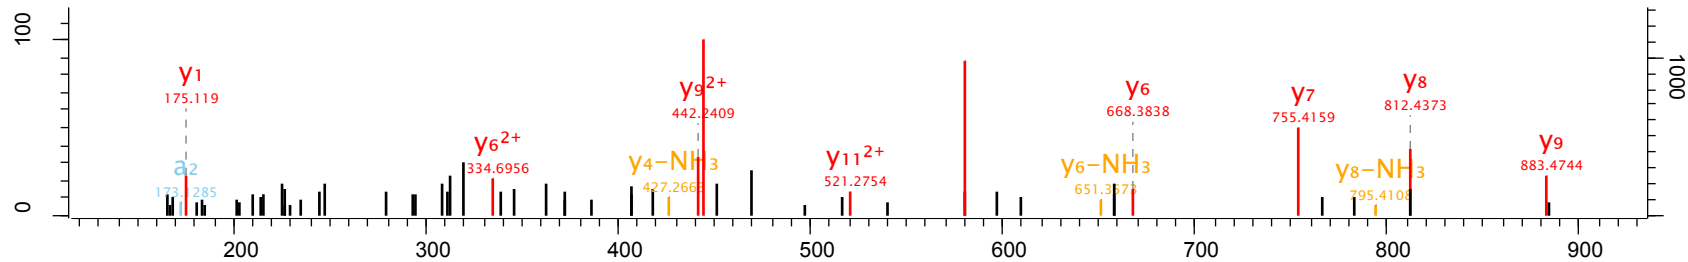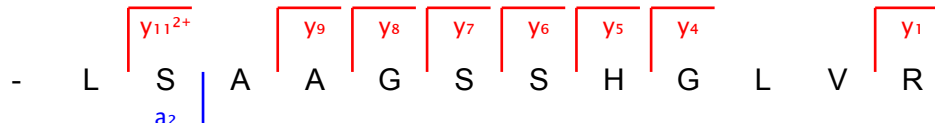

Raw file

Scan

Method

Score

m/z

Gene names

20141014\_fract12\_dyn\_5ul\_F4\_01\_591

12205

TOF; CID

75.91

570.63

HPS1

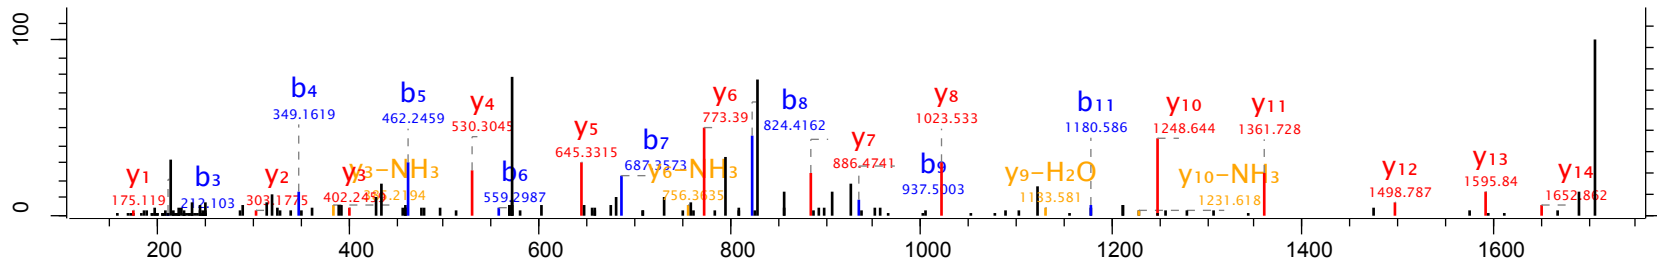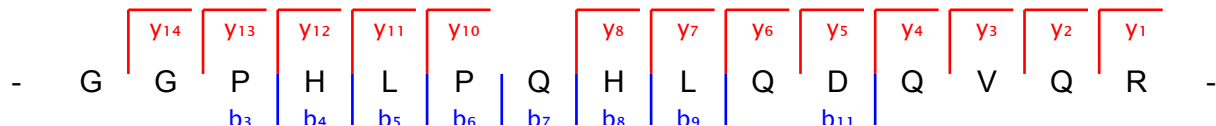

| Raw file                           | Scan  | Method   | Score  | m/z   | Gene names |
|------------------------------------|-------|----------|--------|-------|------------|
| 20141014_fract12_dyn_5ul_F4_01_591 | 12895 | TOF; CID | 151.07 | 586.8 | SULT1E1    |

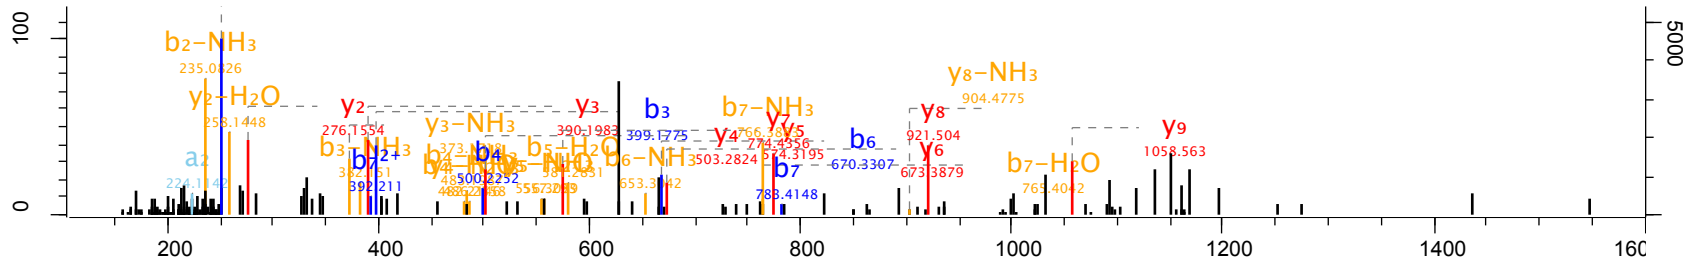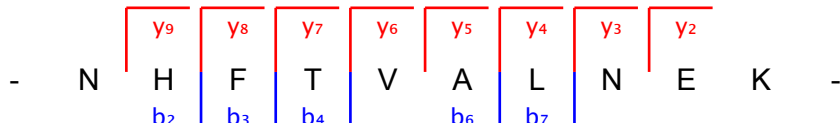

Raw file

20141014\_fract12\_dyn\_5ul\_F4\_01\_591

Scan

14368

Method

TOF; CID

Score

69.03

m/z

434.25

Gene names

RELL1

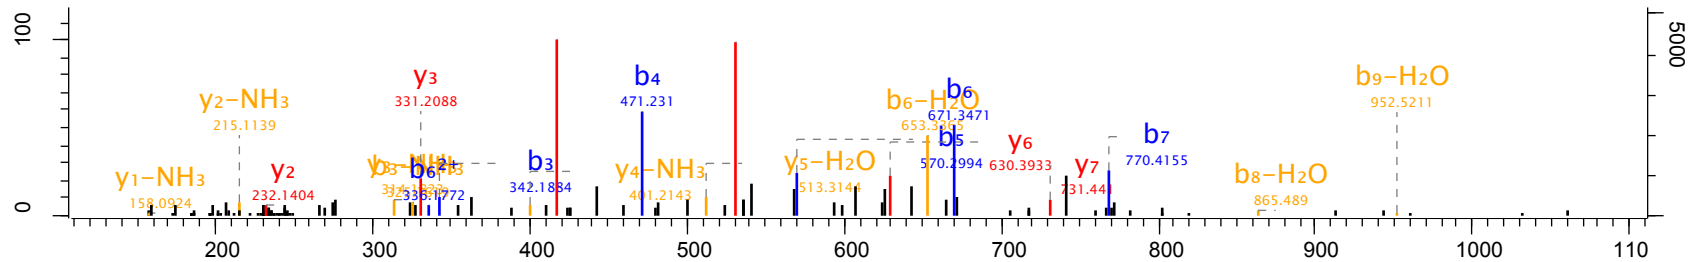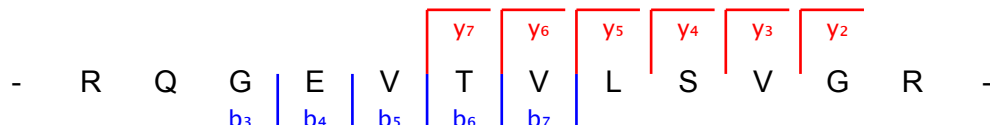

Raw file

20141014\_fract12\_dyn\_5ul\_F4\_01\_591

Scan

14370

Method

TOF; CID

Score

74.61

m/z

578.82

Gene names

MAP3K11

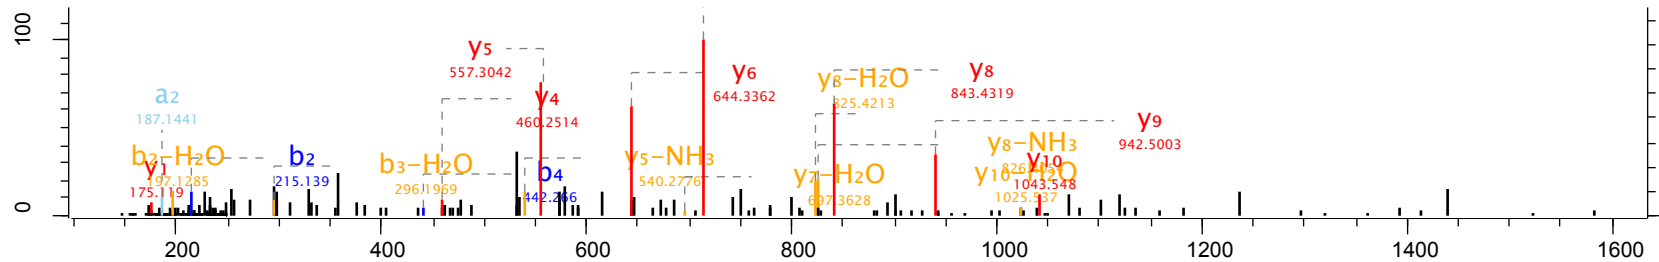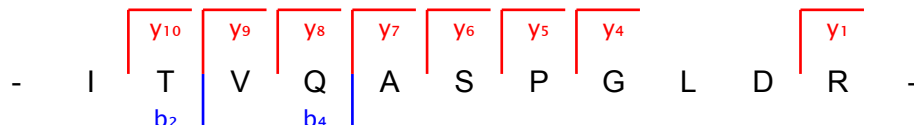



| Raw file                           | Scan  | Method   | Score | m/z    | Gene names |
|------------------------------------|-------|----------|-------|--------|------------|
| 20141014_fract12_dyn_5ul_F4_01_591 | 15999 | TOF; CID | 93.6  | 479.27 | SLIT1      |

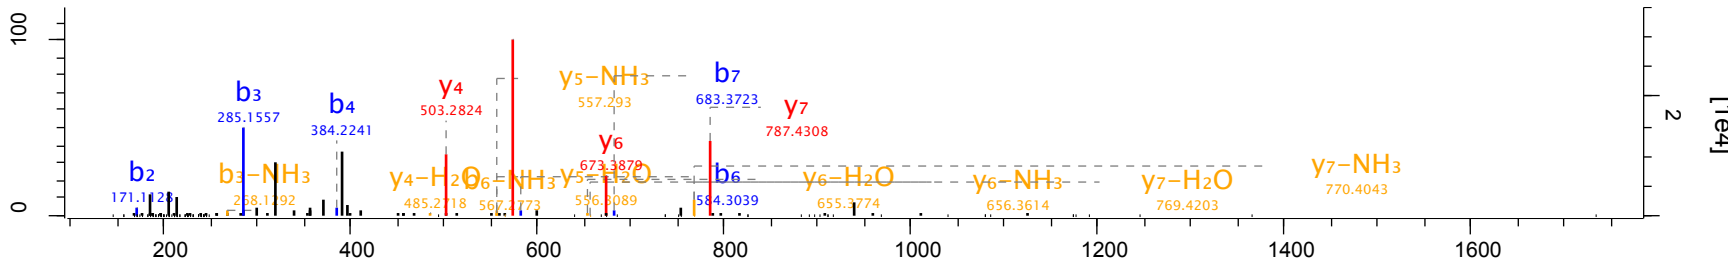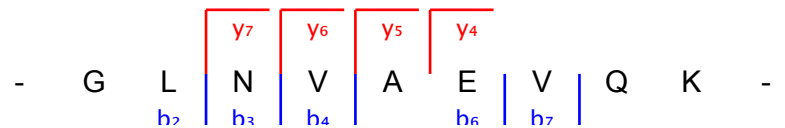

| Raw file                           | Scan  | Method   | Score | m/z    | Gene names |
|------------------------------------|-------|----------|-------|--------|------------|
| 20141014_fract12_dyn_5ul_F4_01_591 | 23595 | TOF; CID | 89.23 | 802.89 | C12orf49   |

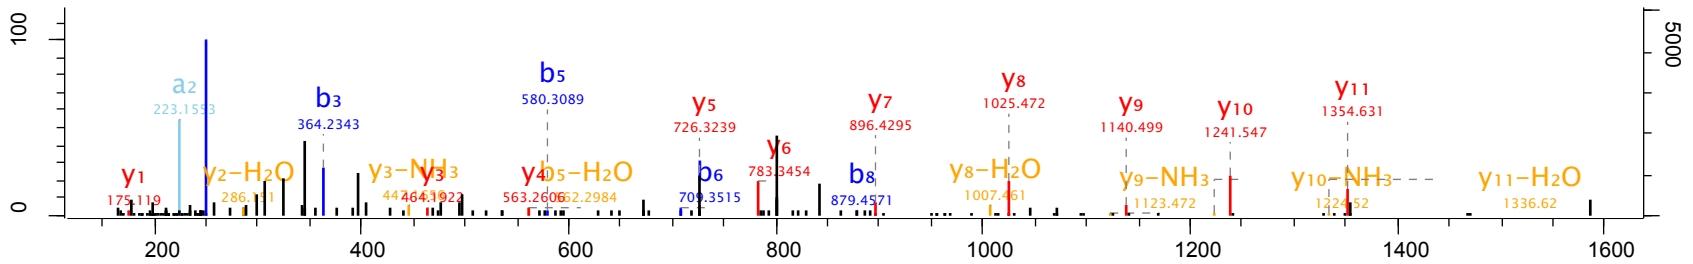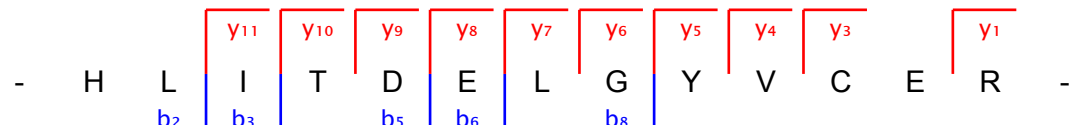

| Raw file                           | Scan  | Method   | Score | m/z    | Gene names |
|------------------------------------|-------|----------|-------|--------|------------|
| 20141014_fract12_dyn_5ul_F4_01_591 | 25261 | TOF; CID | 43.59 | 486.95 | TIGD1      |

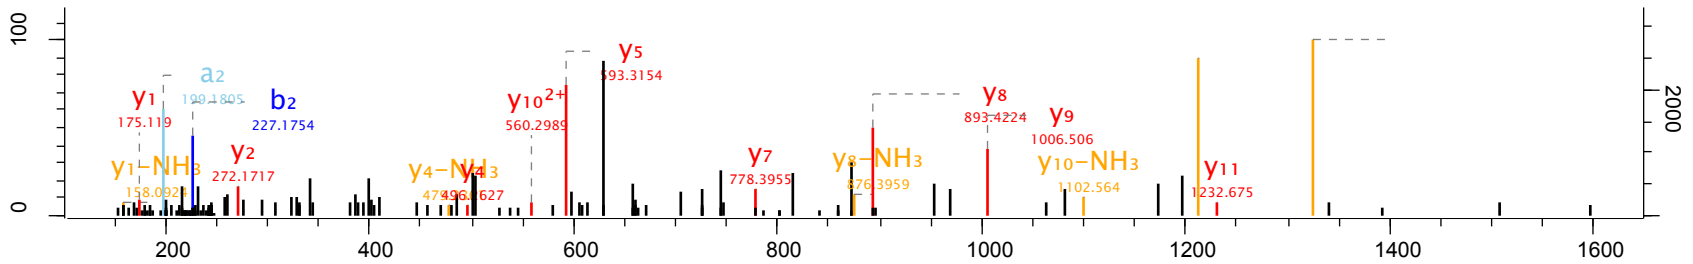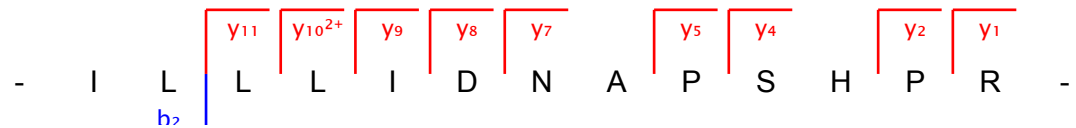

| Raw file                           | Scan  | Method   | Score | m/z    | Gene names |
|------------------------------------|-------|----------|-------|--------|------------|
| 20141014_fract12_dyn_5ul_F4_01_591 | 25732 | TOF; CID | 59.23 | 655.86 | USP40      |

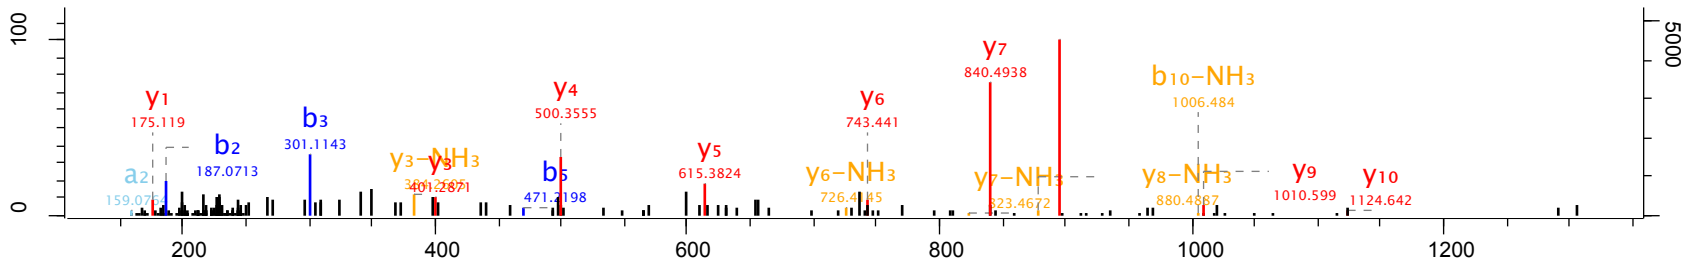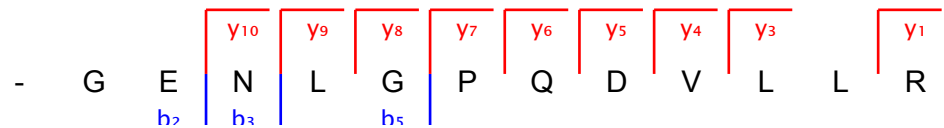

Raw file

20141014\_fract12\_dyn\_5ul\_F4\_01\_591

Scan

28389

Method

TOF; CID

Score

121.56

m/z

710.84

Gene names

SLC39A13

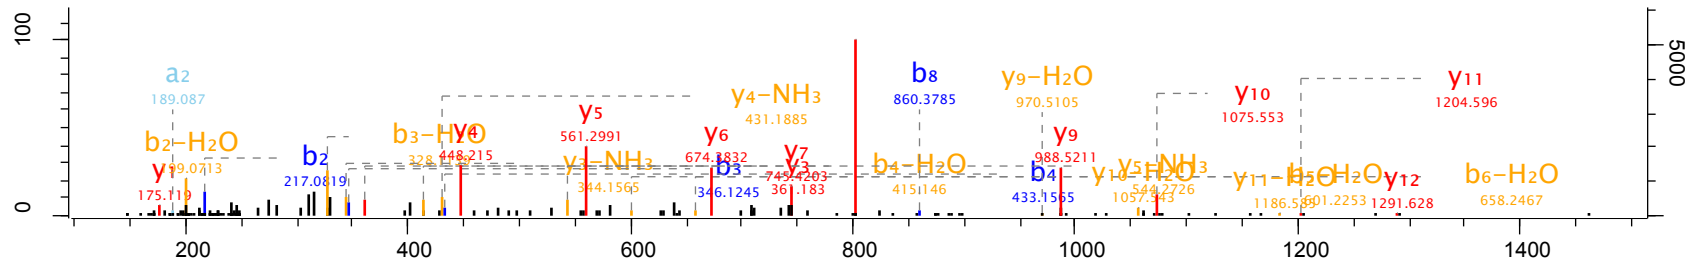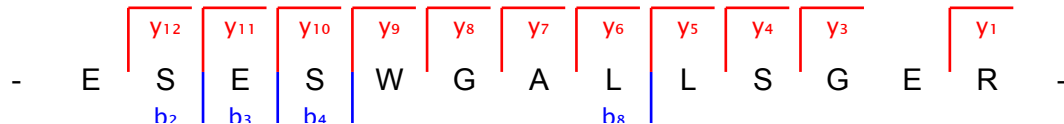

Raw file

20141014\_fract12\_dyn\_5ul\_F4\_01\_591

Scan

28819

Method

TOF; CID

Score

112.36

m/z

622.37

Gene names

MT-ATP6

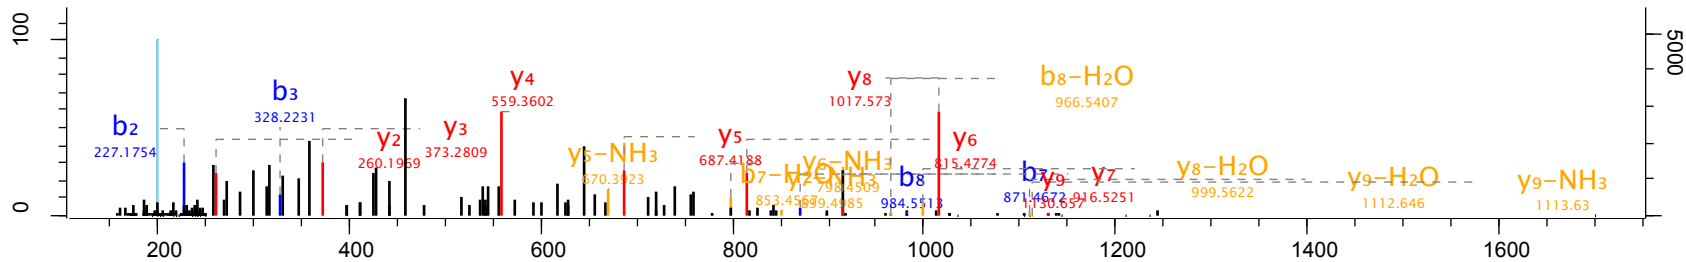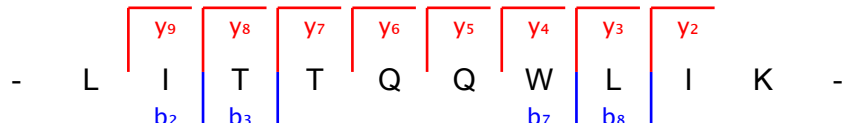

Raw file 20141014\_fract12\_dyn\_5ul\_F4\_01\_591 Scan 30571 Method TOF; CID Score 69.88 m/z 555.31 Gene names ELF3

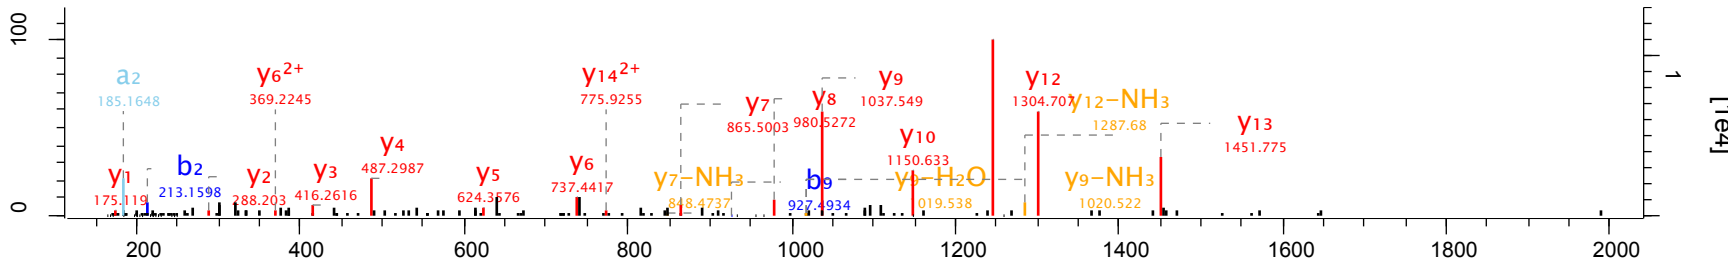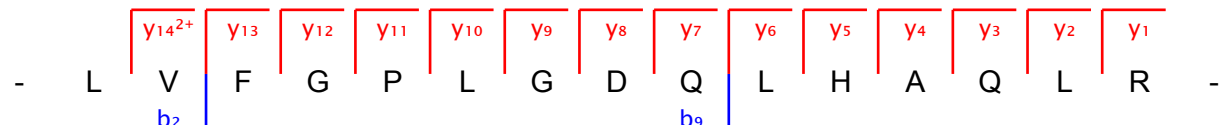

| Raw file                           | Scan  | Method   | Score | m/z    | Gene names |
|------------------------------------|-------|----------|-------|--------|------------|
| 20141014_fract12_dyn_5ul_F4_01_591 | 34630 | TOF; CID | 77.22 | 574.99 | ZMYND19    |

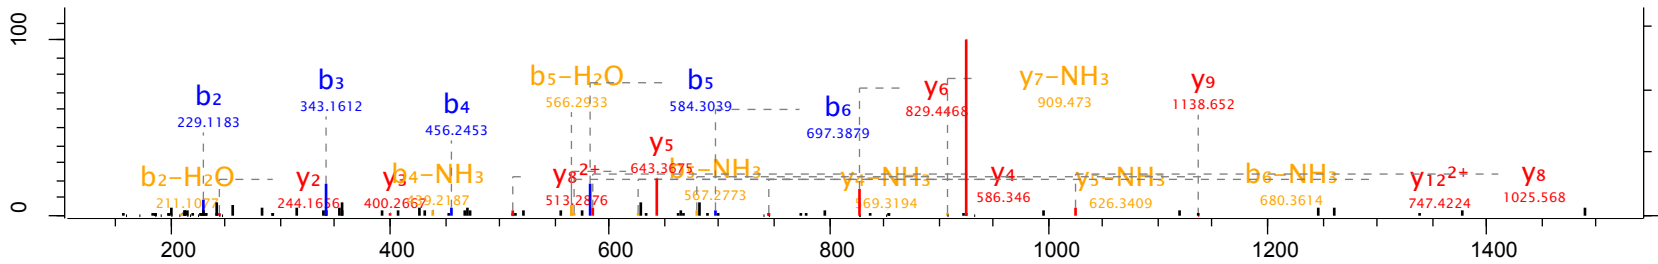

[1e4]

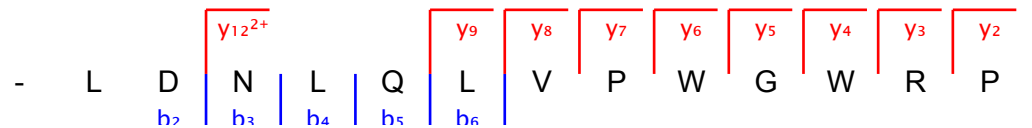



Raw file

20141014\_fract12\_dyn\_5ul\_F4\_01\_591

Scan

34915

Method

TOF; CID

Score

140.2

m/z

666.09

Gene names

SLC39A8

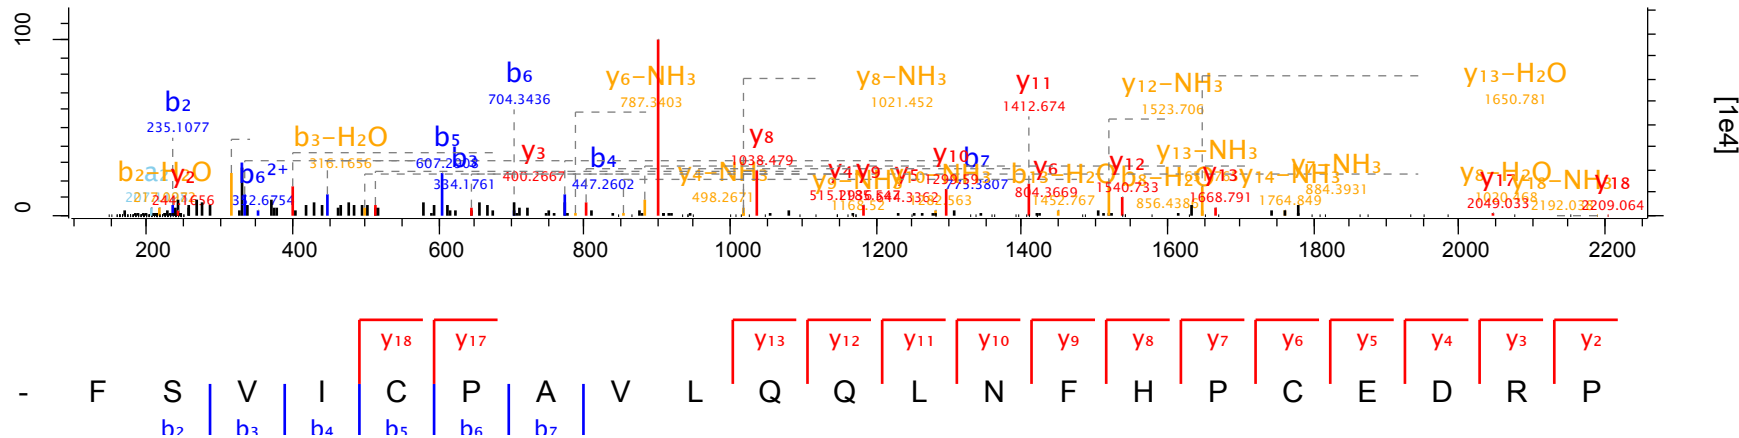

Raw file

20141014\_fract12\_dyn\_5ul\_F4\_01\_591

Scan

35587

Method

TOF; CID

Score

88.28

m/z

881.47

Gene names

C5orf28

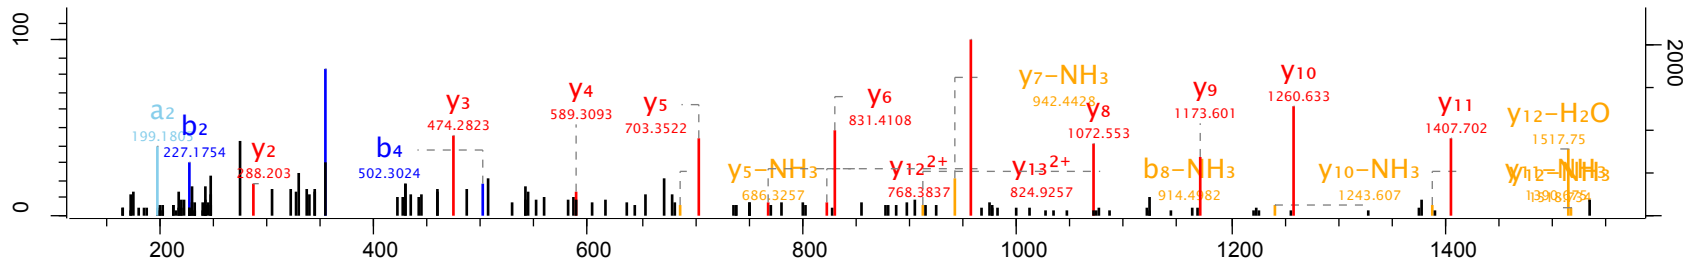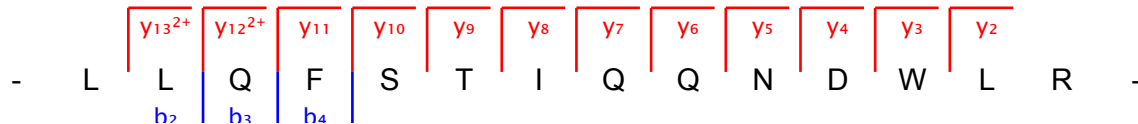

Raw file

20141014\_fract12\_dyn\_5ul\_F4\_01\_591

Scan

37009

Method

TOF; CID

Score

41.26

m/z

546.79

Gene names

S100A12

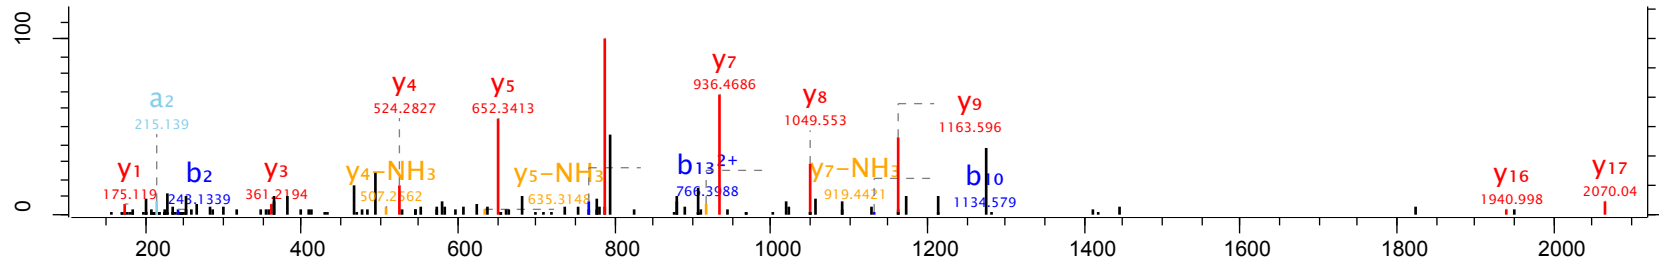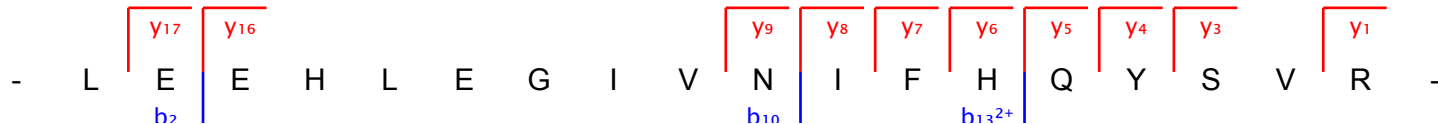

| Raw file                           | Scan  | Method   | Score  | m/z    | Gene names |
|------------------------------------|-------|----------|--------|--------|------------|
| 20141014_fract12_dyn_5ul_F4_01_591 | 38365 | TOF; CID | 128.22 | 821.44 | ATP6V0D2   |

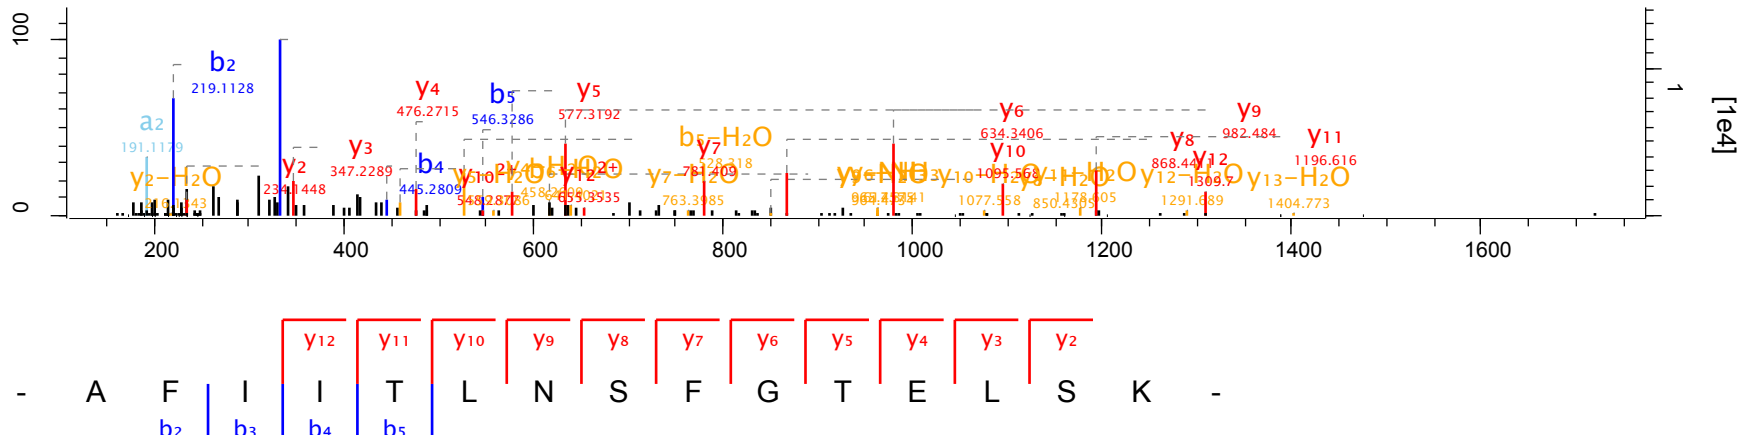

| Raw file                           | Scan  | Method   | Score | m/z    | Gene names |
|------------------------------------|-------|----------|-------|--------|------------|
| 20141014_fract12_dyn_5ul_F4_01_591 | 38881 | TOF; CID | 53.3  | 712.44 | SLC36A1    |

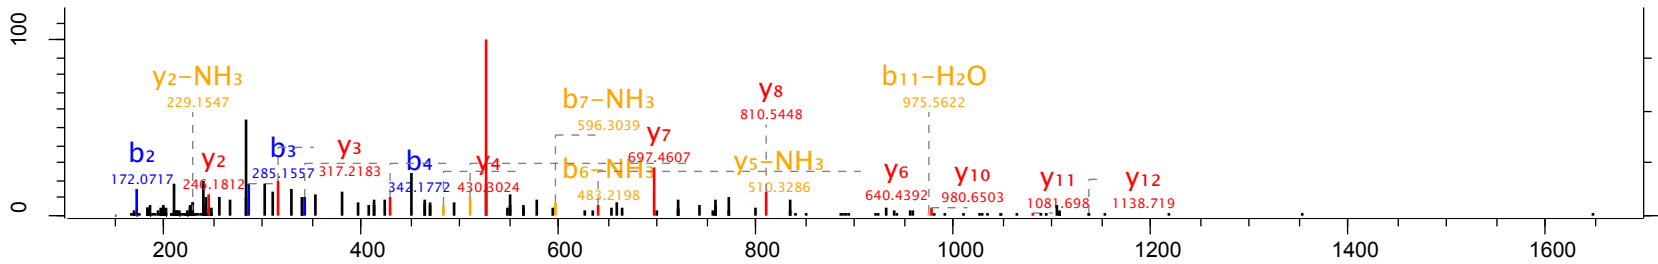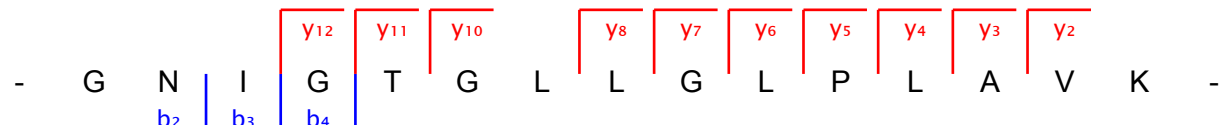

Raw file

20141014\_fract13\_dyn\_5ul\_F5\_01\_592

Scan

13502

Method

TOF; CID

Score

103.13

m/z

485.91

Gene names

SLC41A1

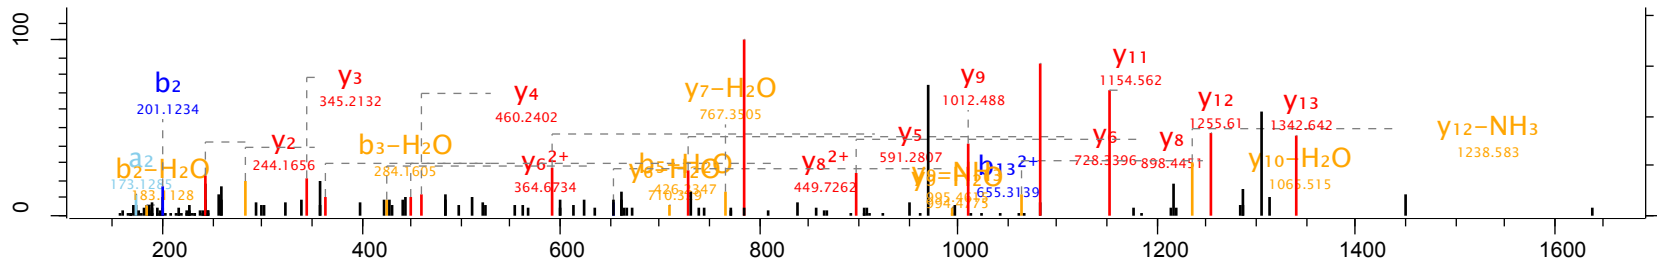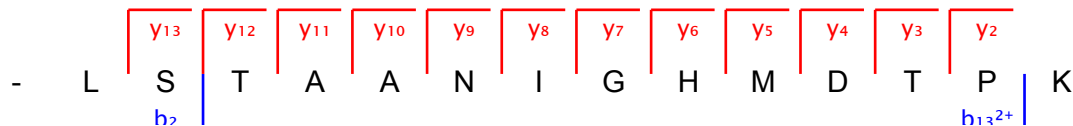

Raw file

20141014\_fract13\_dyn\_5ul\_F5\_01\_592

Scan

18052

Method

TOF; CID

Score

106.14

m/z

744.38

Gene names

DNAAF3

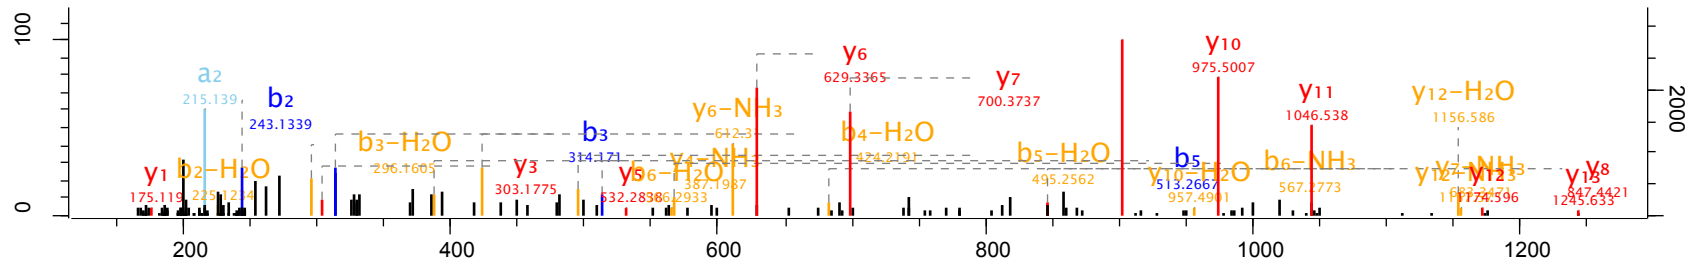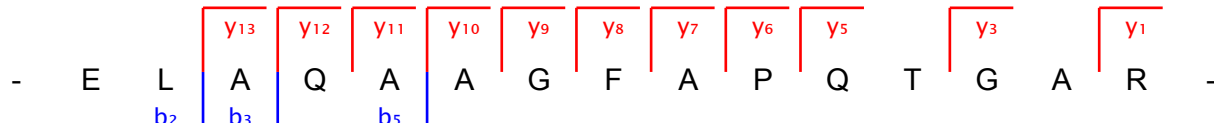

Raw file

20141014\_fract13\_dyn\_5ul\_F5\_01\_592

Scan

19254

Method

TOF; CID

Score

71.69

m/z

877.46

Gene names

KCTD2

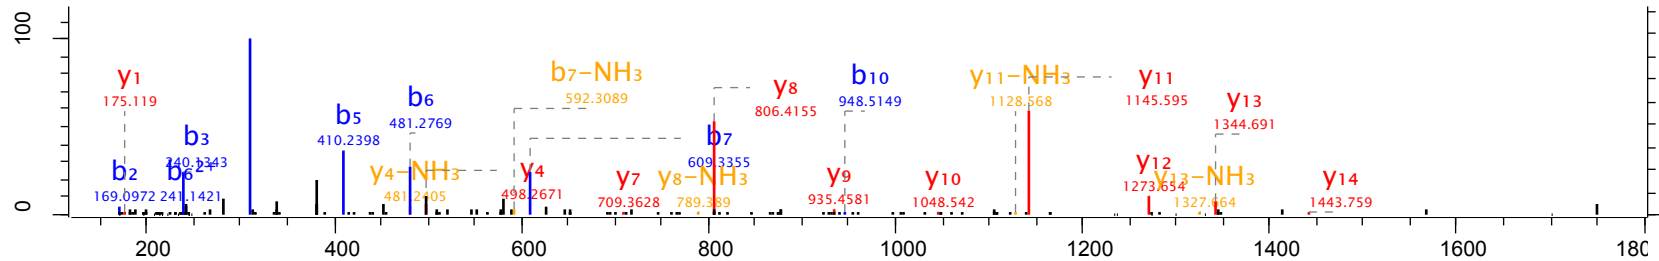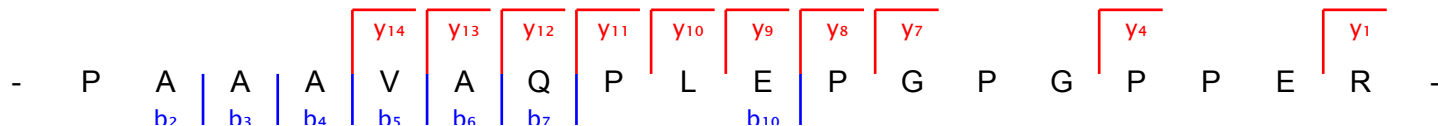



Raw file

20141014\_fract13\_dyn\_5ul\_F5\_01\_592

Scan

19954

Method

TOF; CID

Score

61.17

m/z

672.32

Gene names

IL17RA

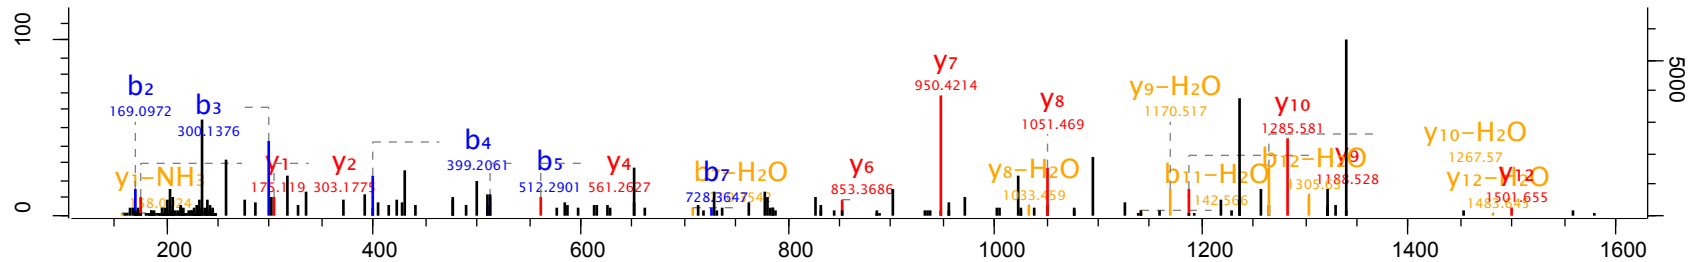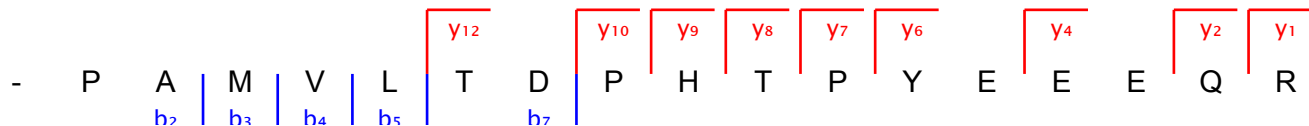

| Raw file                           | Scan  | Method   | Score | m/z    | Gene names |
|------------------------------------|-------|----------|-------|--------|------------|
| 20141014_fract13_dyn_5ul_F5_01_592 | 21431 | TOF; CID | 60.97 | 765.82 | SLC35F6    |

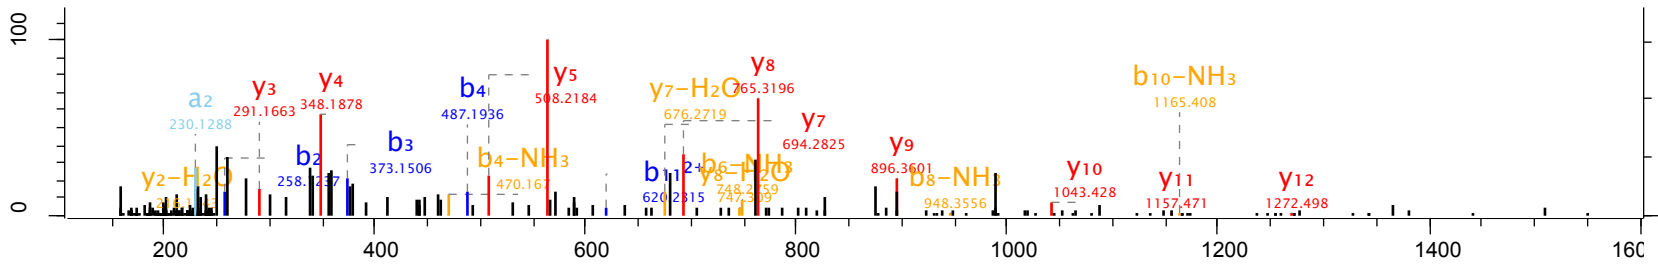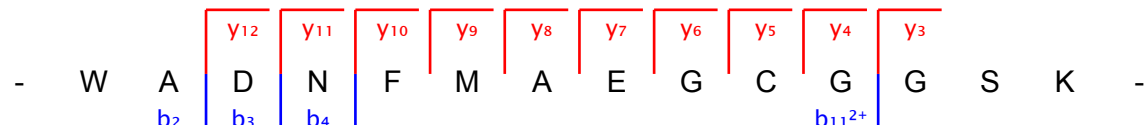

| Raw file                           | Scan  | Method   | Score | m/z    | Gene names |
|------------------------------------|-------|----------|-------|--------|------------|
| 20141014_fract13_dyn_5ul_F5_01_592 | 22212 | TOF; CID | 62.29 | 521.28 | APIAR      |

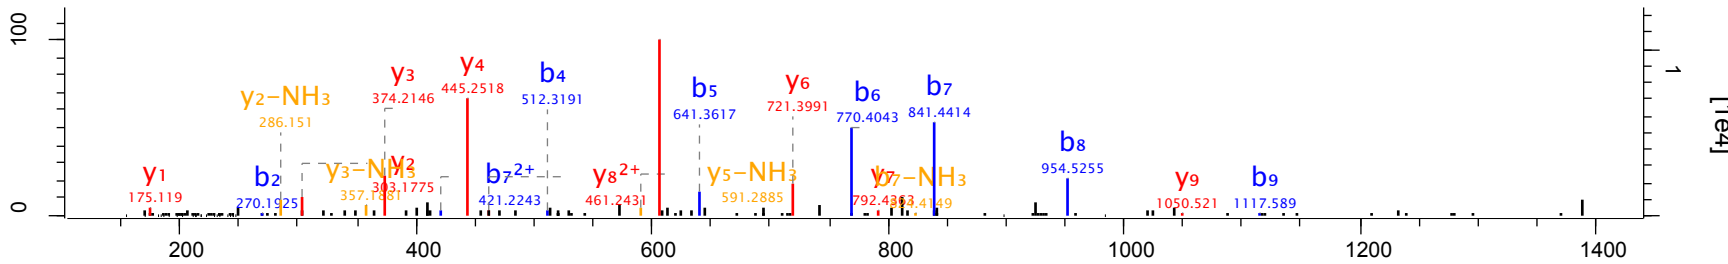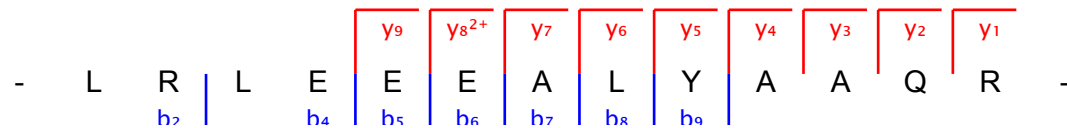

Raw file

20141014\_fract13\_dyn\_5ul\_F5\_01\_592

Scan

22541

Method

TOF; CID

Score

58.02

m/z

972.42

Gene names

LYPD3

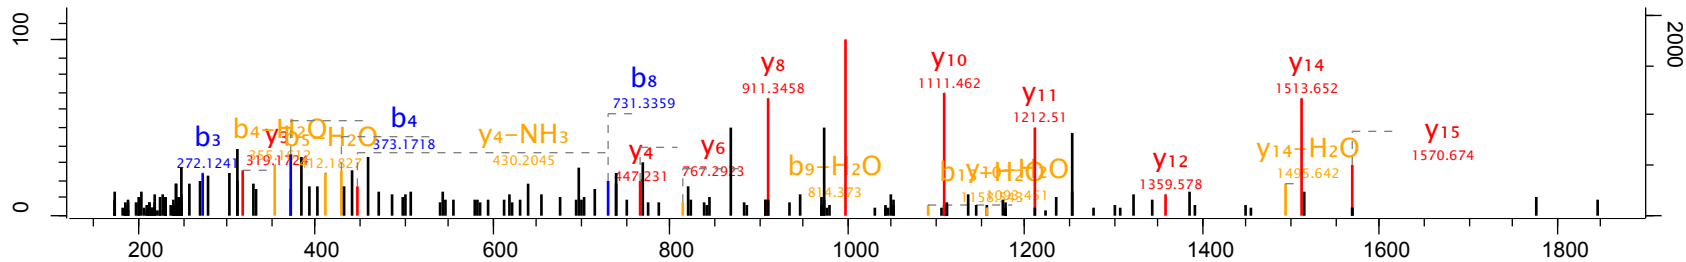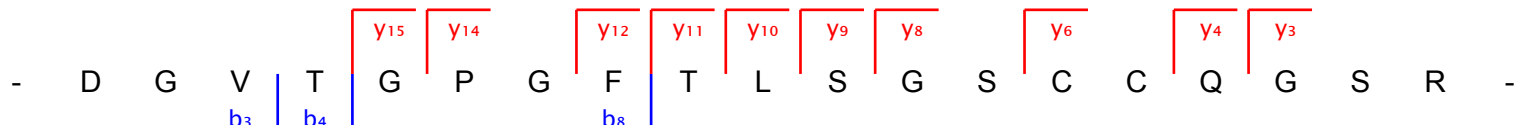

Raw file

20141014\_fract13\_dyn\_5ul\_F5\_01\_592

Scan

23383

Method

TOF; CID

Score

33.96

m/z

773.85

Gene names

TM2D2

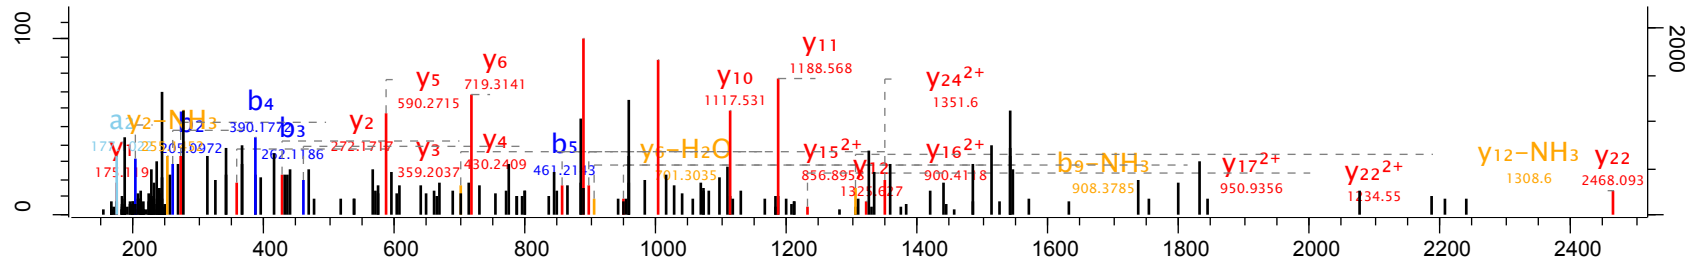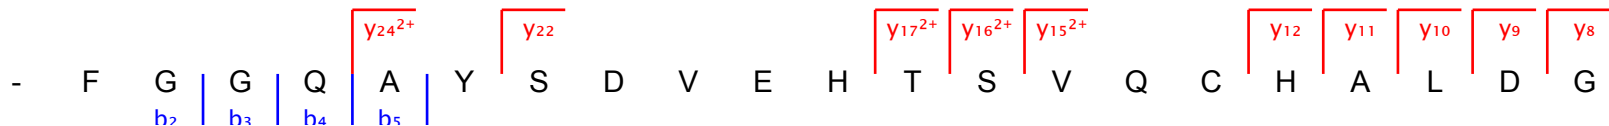

Raw file

20141014\_fract13\_dyn\_5ul\_F5\_01\_592

Scan

24347

Method

TOF; CID

Score

42.09

m/z

773.88

Gene names

METTL10

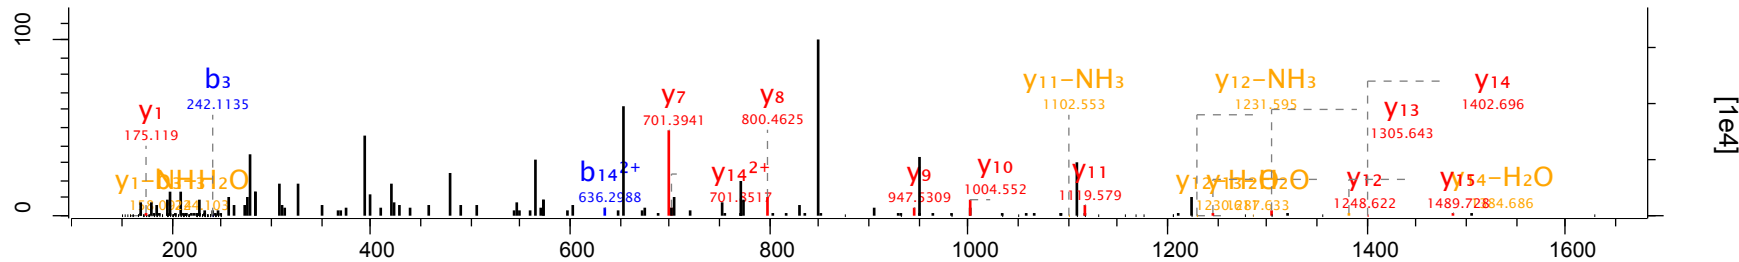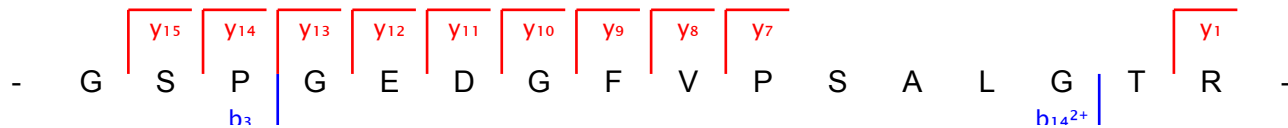

Raw file

20141014\_fract13\_dyn\_5ul\_F5\_01\_592

Scan

24524

Method

TOF; CID

Score

48.22

m/z

728.87

Gene names

ZNF655

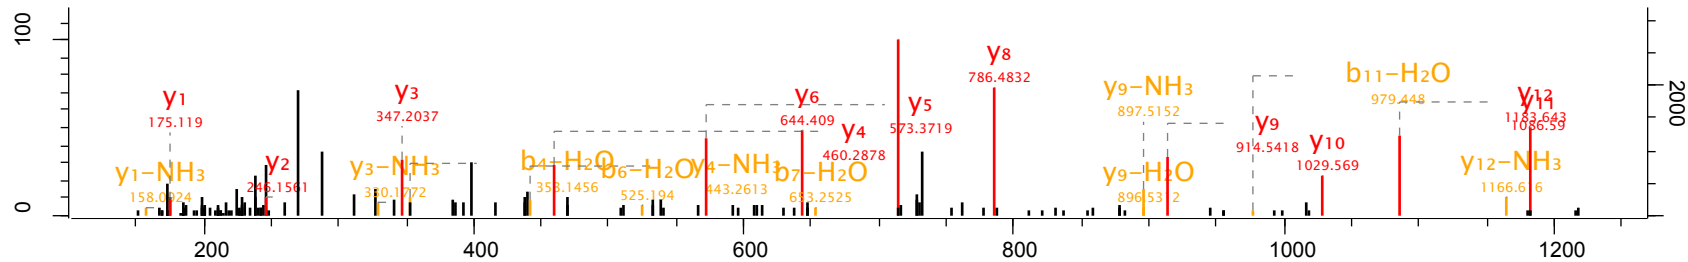

- E G S P G D Q A A A L L T A R -

Fragmentation diagram showing the sequence of amino acids: P, G, D, Q, A, A, A, L, L, T, A, R. Red brackets above the sequence indicate the fragmentation points for the y-ions (y1 to y12) shown in the mass spectrum above.

| Raw file                           | Scan  | Method   | Score | m/z    | Gene names |
|------------------------------------|-------|----------|-------|--------|------------|
| 20141014_fract13_dyn_5ul_F5_01_592 | 24998 | TOF; CID | 81.3  | 477.82 | BBS10      |

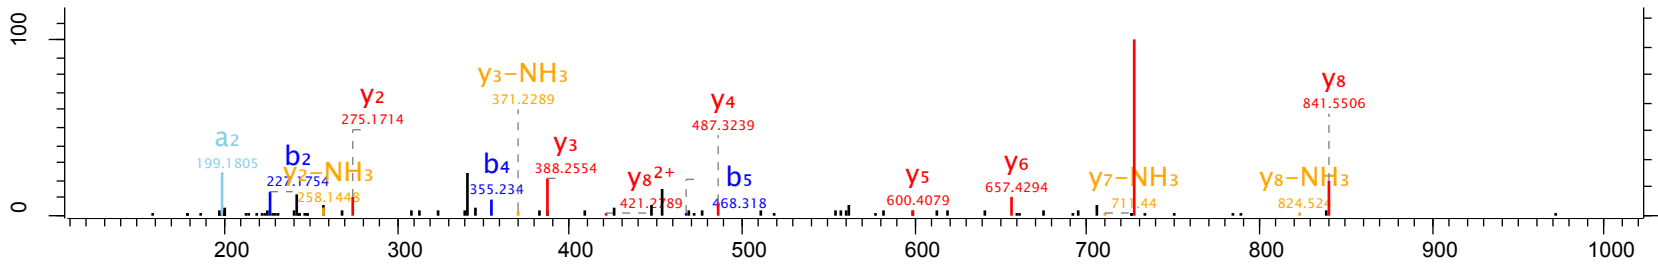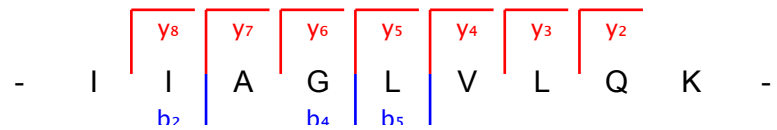



Raw file

20141014\_fract13\_dyn\_5ul\_F5\_01\_592

Scan

27038

Method

TOF; CID

Score

62.09

m/z

580.31

Gene names

GADD45A

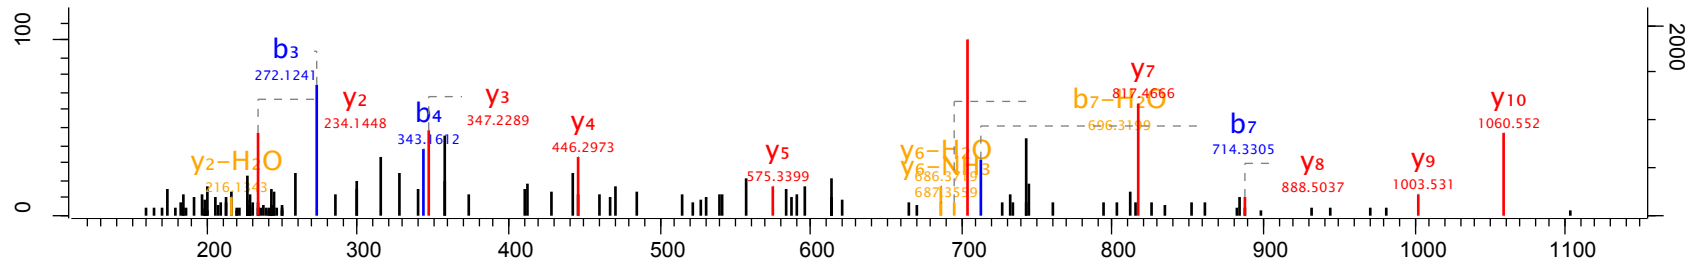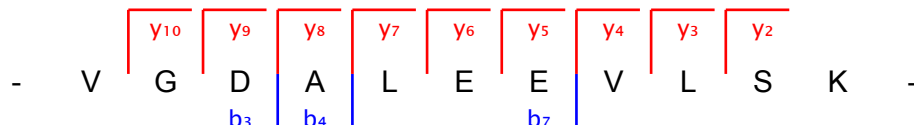

Raw file

20141014\_fract13\_dyn\_5ul\_F5\_01\_592

Scan

27860

Method

TOF; CID

Score

103.08

m/z

543.8

Gene names

CPA4

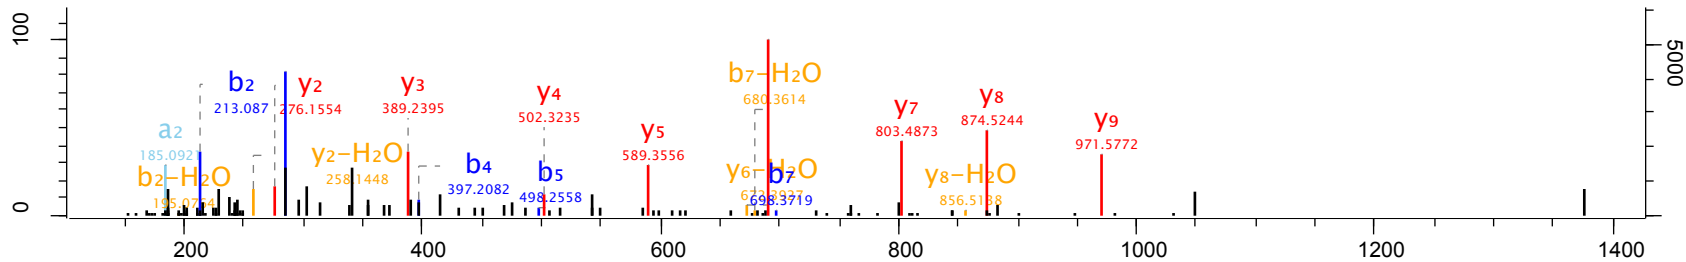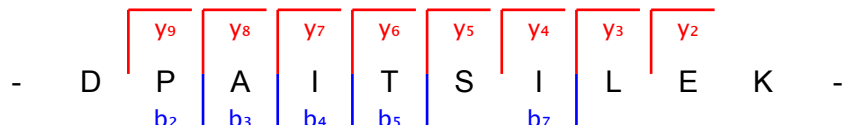

| Raw file                           | Scan  | Method   | Score | m/z    | Gene names |
|------------------------------------|-------|----------|-------|--------|------------|
| 20141014_fract13_dyn_5ul_F5_01_592 | 29425 | TOF; CID | 78.67 | 800.41 | ATMIN      |

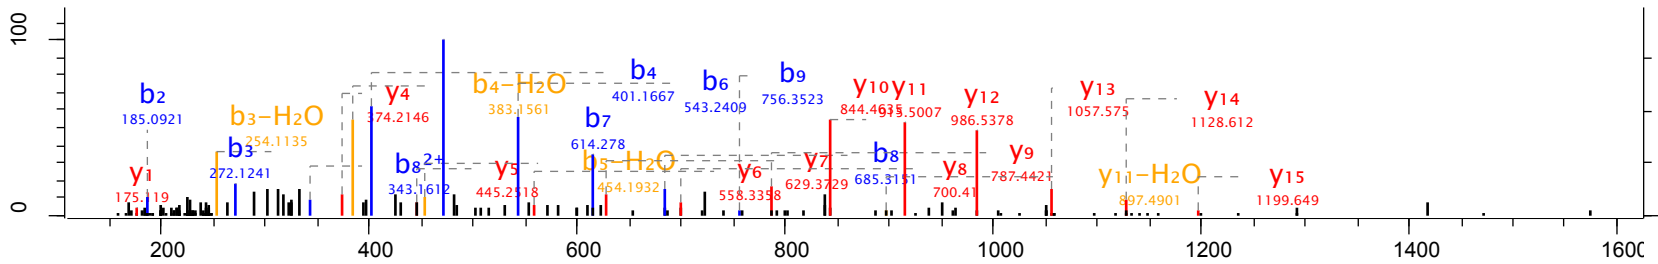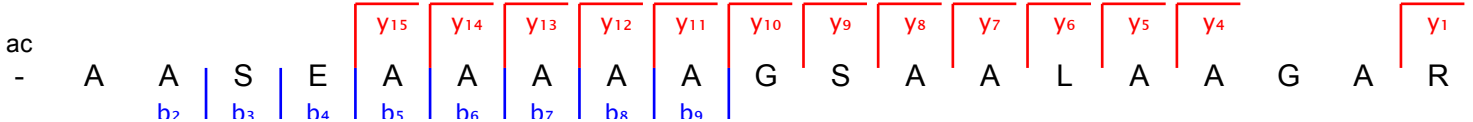

| Raw file                           | Scan  | Method   | Score | m/z   | Gene names |
|------------------------------------|-------|----------|-------|-------|------------|
| 20141014_fract13_dyn_5ul_F5_01_592 | 30641 | TOF; CID | 72.32 | 588.8 | PKD2       |

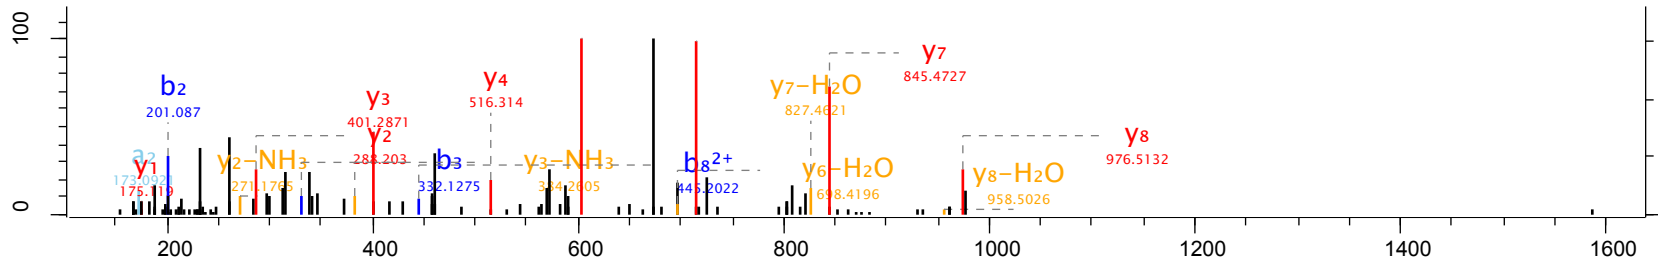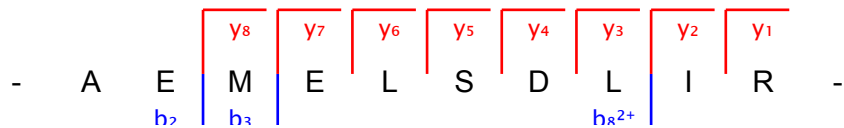

Raw file

20141014\_fract13\_dyn\_5ul\_F5\_01\_592

Scan

31178

Method

TOF; CID

Score

118.51

m/z

836.38

Gene names

WRB

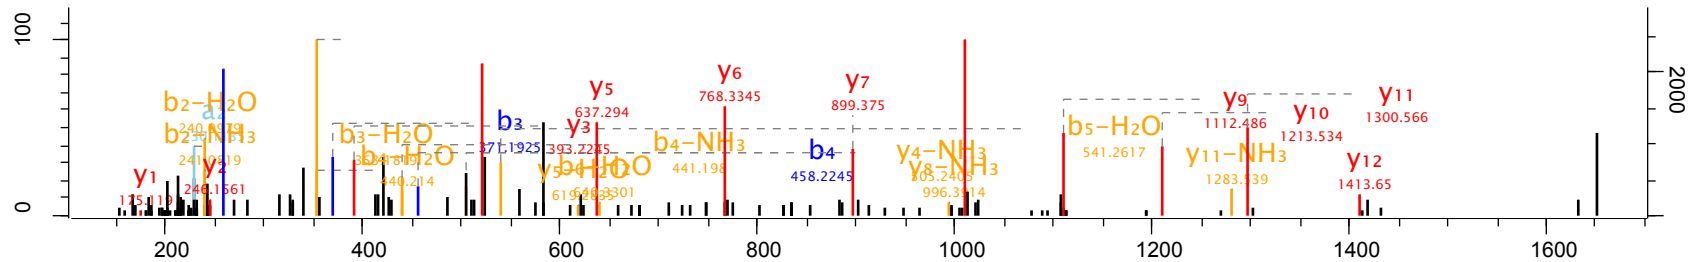

- Q E L S T V N M M D E F A R -

b<sub>2</sub> b<sub>3</sub> b<sub>4</sub>

y<sub>12</sub> y<sub>11</sub> y<sub>10</sub> y<sub>9</sub> y<sub>8</sub> y<sub>7</sub> y<sub>6</sub> y<sub>5</sub> y<sub>4</sub> y<sub>3</sub> y<sub>2</sub> y<sub>1</sub>

Raw file

20141014\_fract13\_dyn\_5ul\_F5\_01\_592

Scan

32116

Method

TOF; CID

Score

104.05

m/z

600.84

Gene names

ATG101

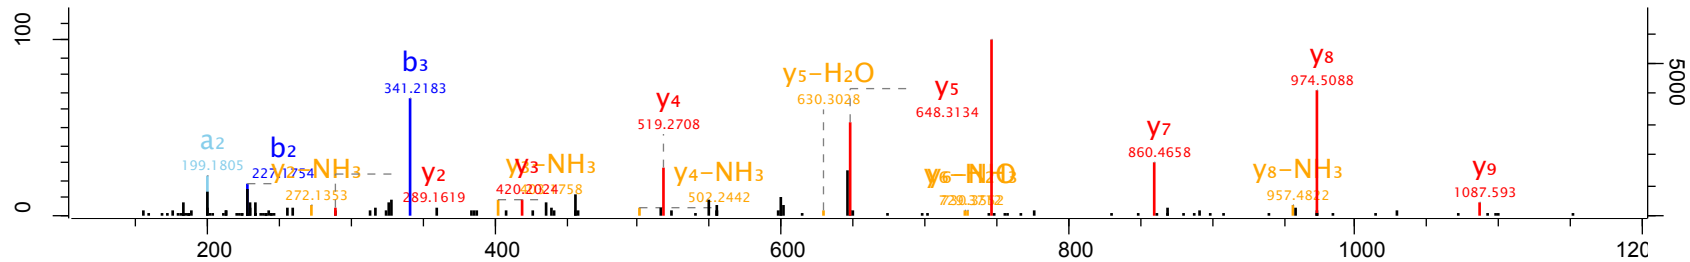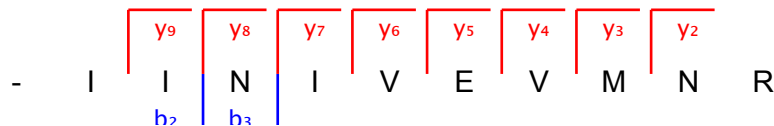

Raw file

20141014\_fract13\_dyn\_5ul\_F5\_01\_592

Scan

32472

Method

TOF; CID

Score

60.2

m/z

707.41

Gene names

MRI

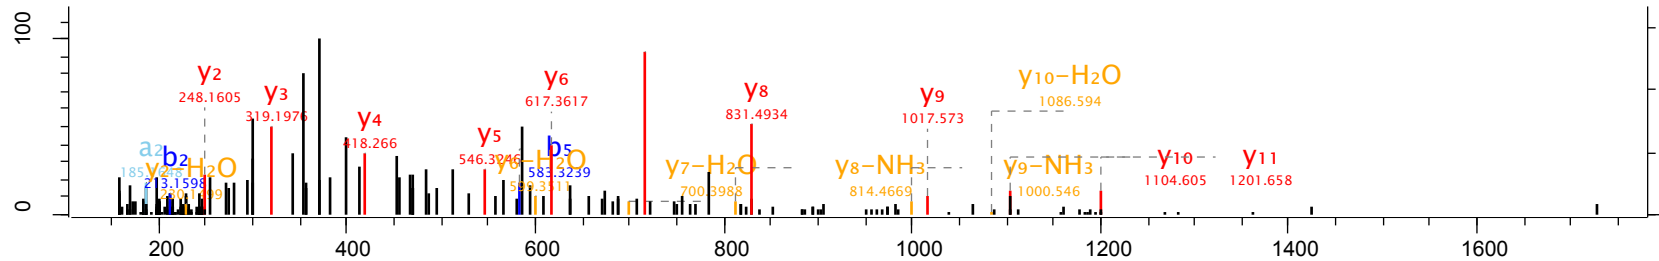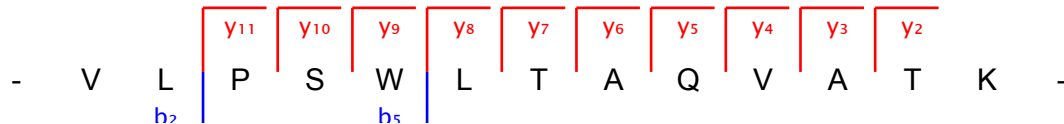

| Raw file                           | Scan  | Method   | Score | m/z    | Gene names |
|------------------------------------|-------|----------|-------|--------|------------|
| 20141014_fract13_dyn_5ul_F5_01_592 | 32774 | TOF; CID | 55.72 | 745.38 | PPARGC1B   |

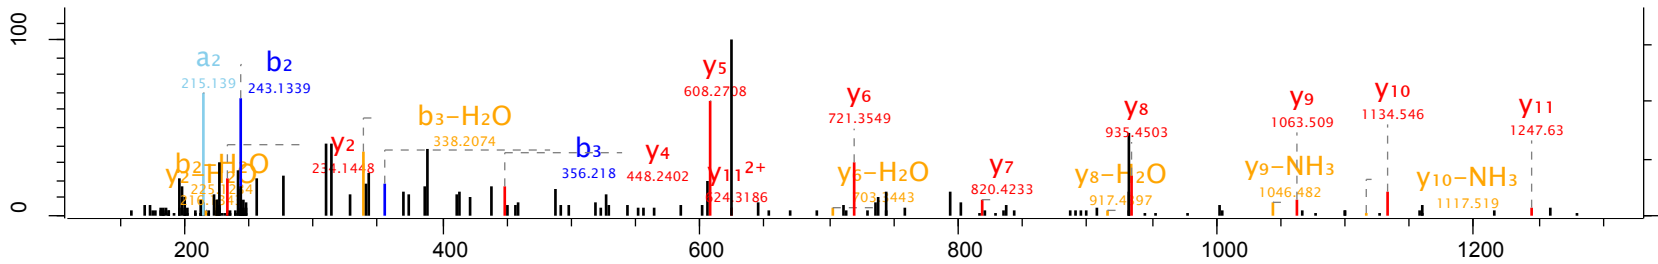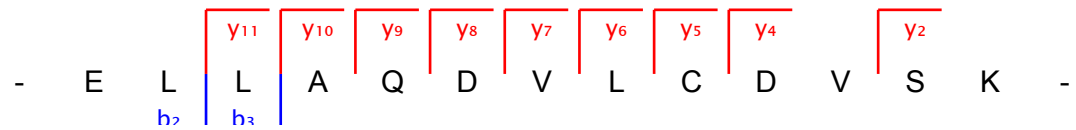



| Raw file                           | Scan  | Method   | Score | m/z    | Gene names |
|------------------------------------|-------|----------|-------|--------|------------|
| 20141014_fract13_dyn_5ul_F5_01_592 | 33810 | TOF; CID | 63.19 | 499.94 | METTL4     |

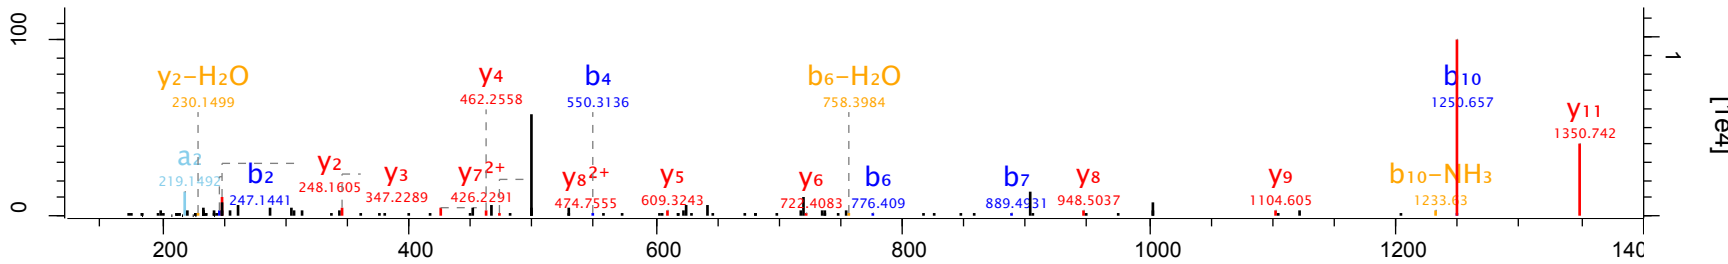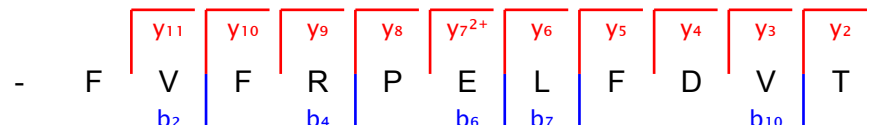

| Raw file                           | Scan  | Method   | Score | m/z | Gene names |
|------------------------------------|-------|----------|-------|-----|------------|
| 20141014_fract13_dyn_5ul_F5_01_592 | 34518 | TOF; CID | 45.44 | 576 | DHRS3      |

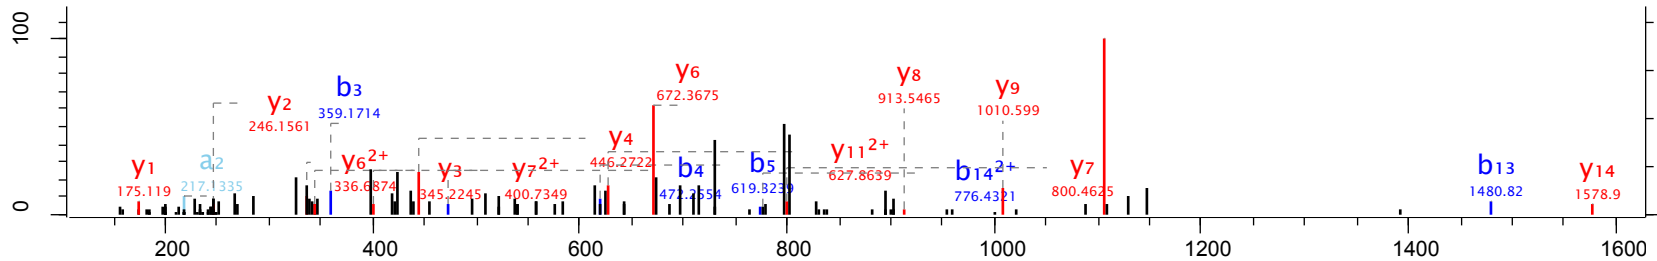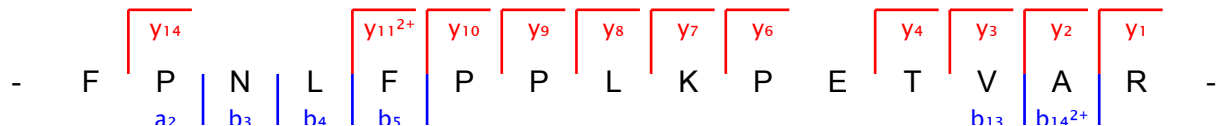

Raw file  
 20141014\_fract13\_dyn\_5ul\_F5\_01\_592

| Scan  | Method   | Score | m/z    | Gene names |
|-------|----------|-------|--------|------------|
| 34790 | TOF; CID | 79.34 | 571.32 | G2E3       |

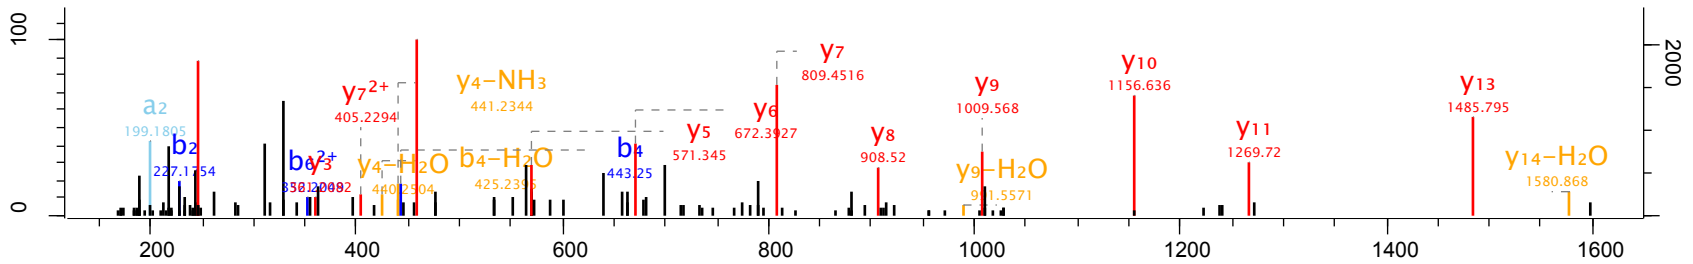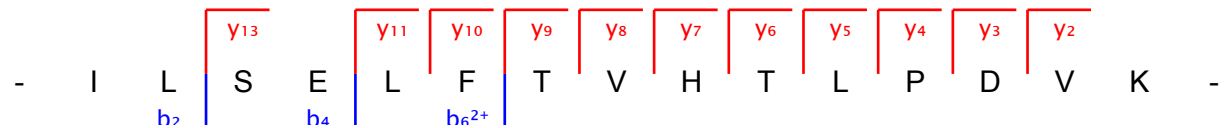

| Raw file                           | Scan  | Method   | Score | m/z    | Gene names |
|------------------------------------|-------|----------|-------|--------|------------|
| 20141014_fract13_dyn_5ul_F5_01_592 | 35837 | TOF; CID | 81.3  | 493.31 | SLC29A3    |

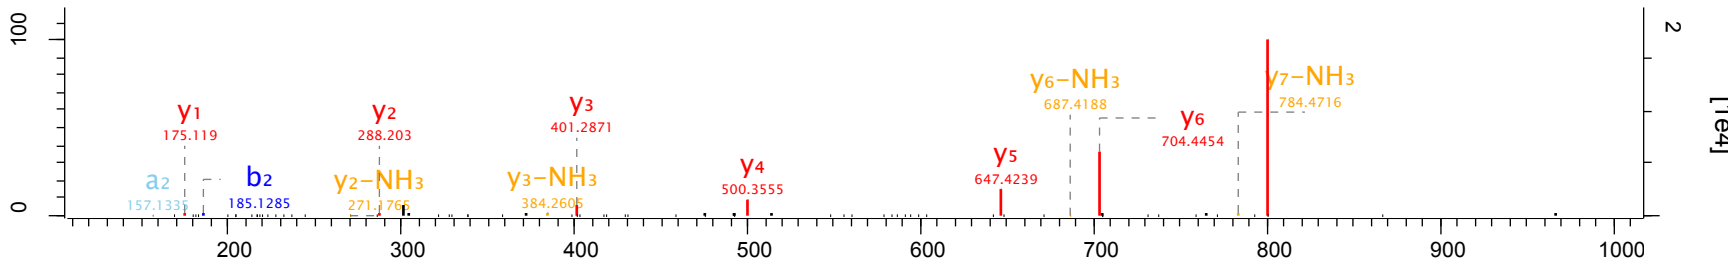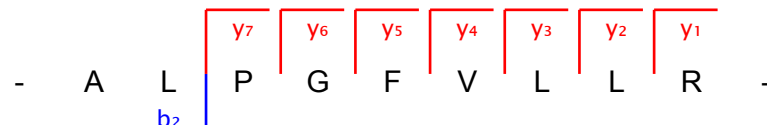

Raw file

20141014\_fract13\_dyn\_5ul\_F5\_01\_592

Scan

37719

Method

TOF; CID

Score

60.55

m/z

748.44

Gene names

SIM2;SIM1

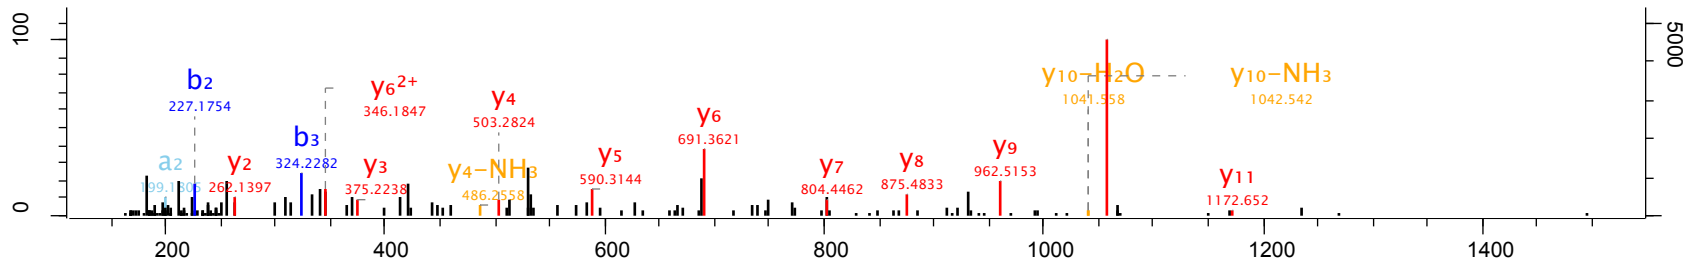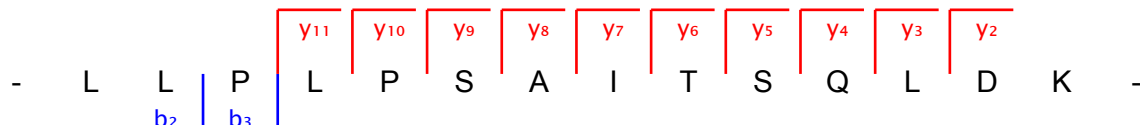

Raw file

20141014\_fract14\_dyn\_5ul\_F6\_01\_593

Scan

10326

Method

TOF; CID

Score

65.18

m/z

412.9

Gene names

ARRDC1-AS1

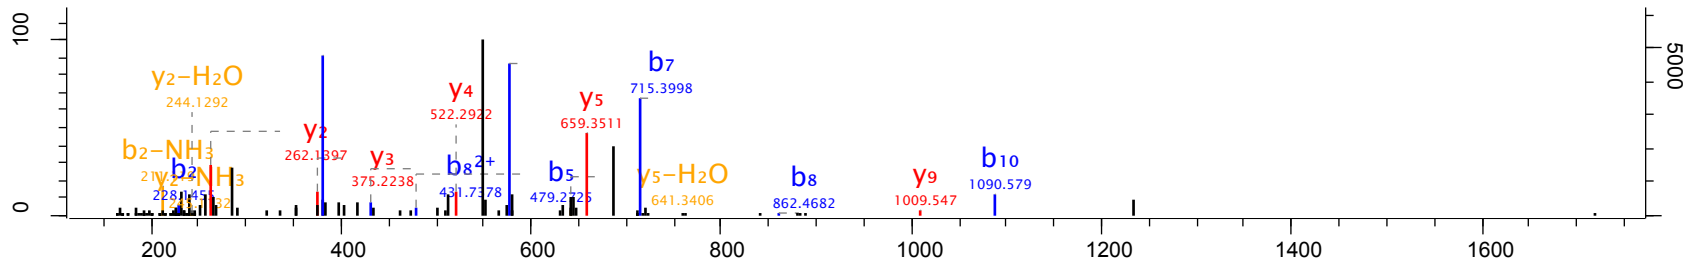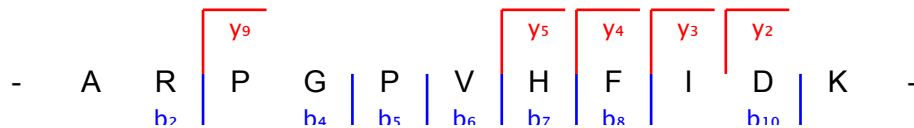

| Raw file                           | Scan  | Method   | Score | m/z    | Gene names |
|------------------------------------|-------|----------|-------|--------|------------|
| 20141014_fract14_dyn_5ul_F6_01_593 | 11009 | TOF; CID | 68.52 | 430.91 | DPY19L3    |

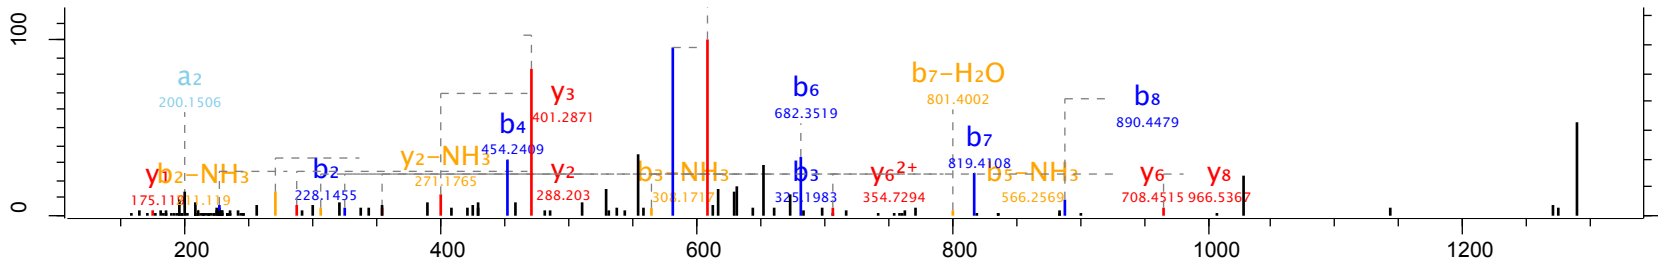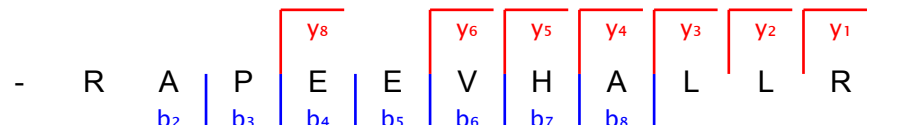

Raw file

20141014\_fract14\_dyn\_5ul\_F6\_01\_593

Scan

11297

Method

TOF; CID

Score

90.38

m/z

690.33

Gene names

MED11

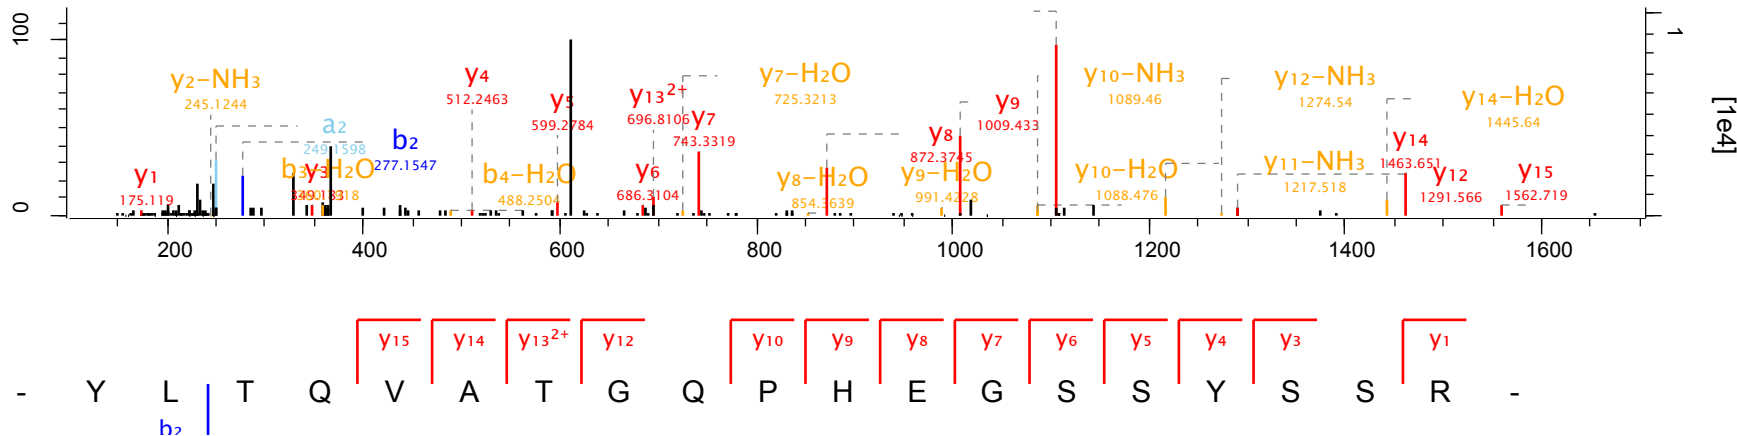



| Raw file                           | Scan  | Method   | Score  | m/z    | Gene names |
|------------------------------------|-------|----------|--------|--------|------------|
| 20141014_fract14_dyn_5ul_F6_01_593 | 12997 | TOF; CID | 118.74 | 420.73 | ARMC7      |

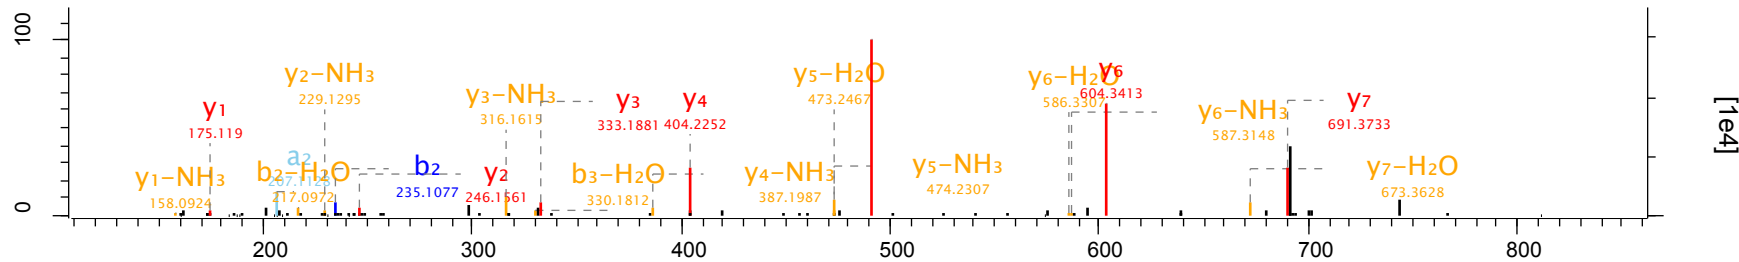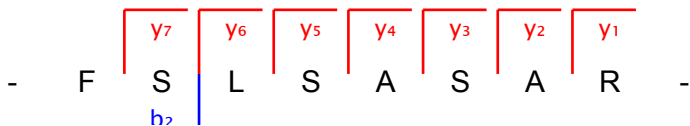

Raw file

20141014\_fract14\_dyn\_5ul\_F6\_01\_593

Scan

13885

Method

TOF; CID

Score

88.16

m/z

569.79

Gene names

SGMS2

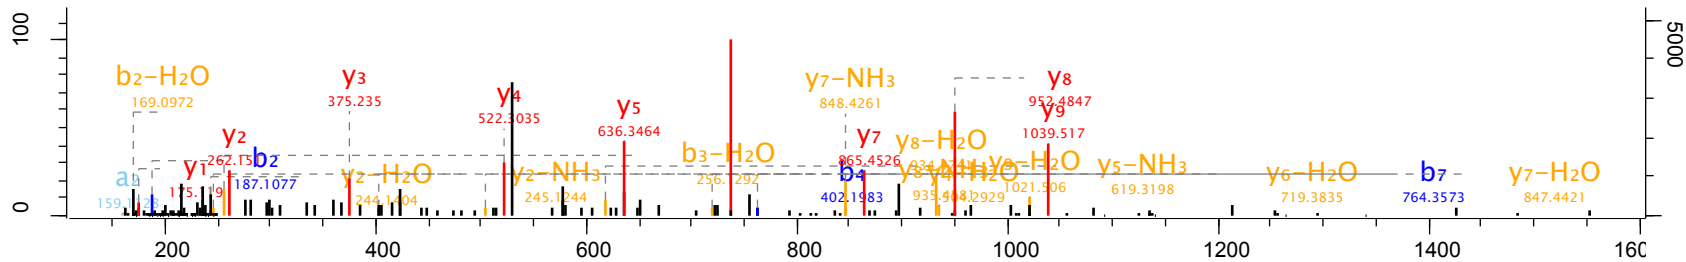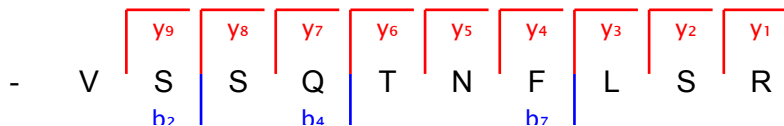

Raw file

20141014\_fract14\_dyn\_5ul\_F6\_01\_593

Scan

18083

Method

TOF; CID

Score

116.37

m/z

587.78

Gene names

MAX

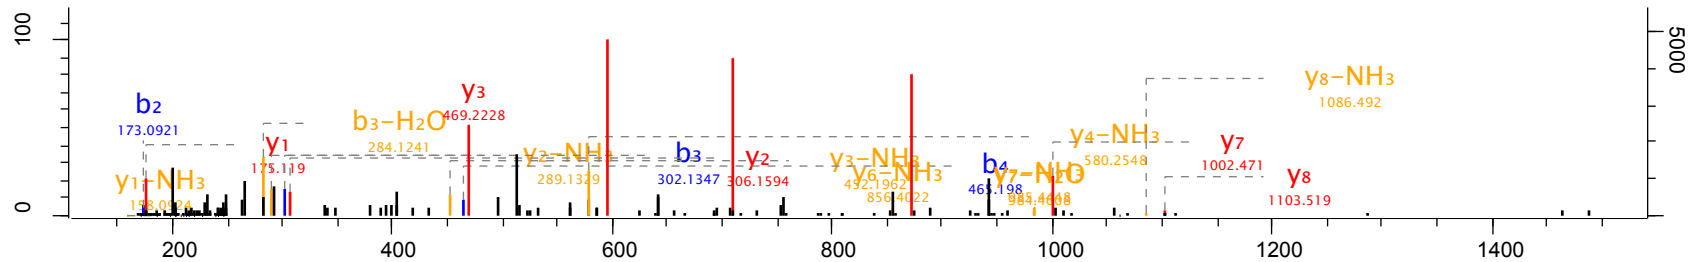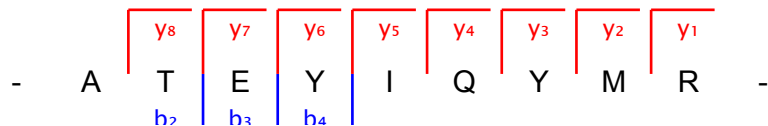

| Raw file                           | Scan  | Method   | Score | m/z    | Gene names |
|------------------------------------|-------|----------|-------|--------|------------|
| 20141014_fract14_dyn_5ul_F6_01_593 | 20499 | TOF; CID | 79.15 | 540.81 | ADAMTS14   |

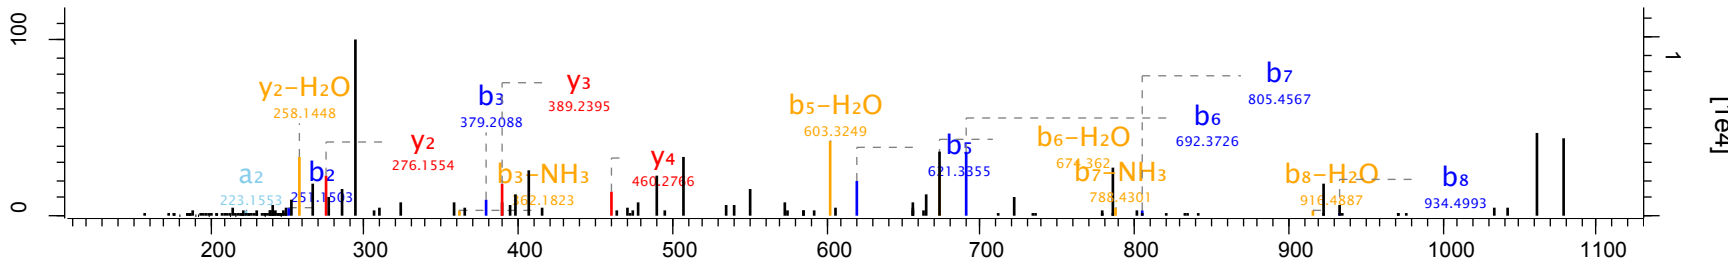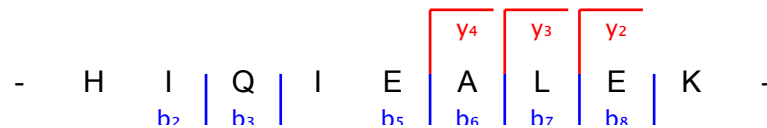

| Raw file                           | Scan  | Method   | Score | m/z    | Gene names |
|------------------------------------|-------|----------|-------|--------|------------|
| 20141014_fract14_dyn_5ul_F6_01_593 | 22717 | TOF; CID | 64.12 | 743.34 | OTX1       |

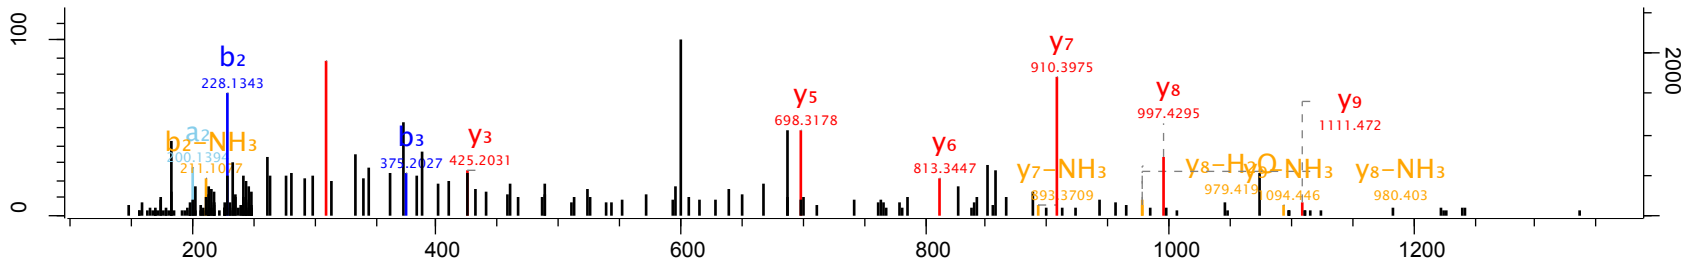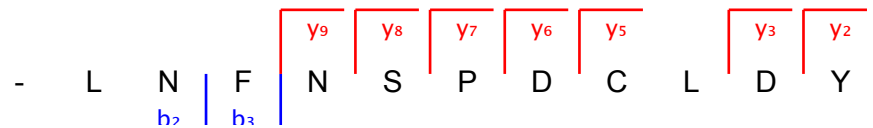

Raw file

20141014\_fract14\_dyn\_5ul\_F6\_01\_593

Scan

24847

Method

TOF; CID

Score

118.96

m/z

928.97

Gene names

HIATL1

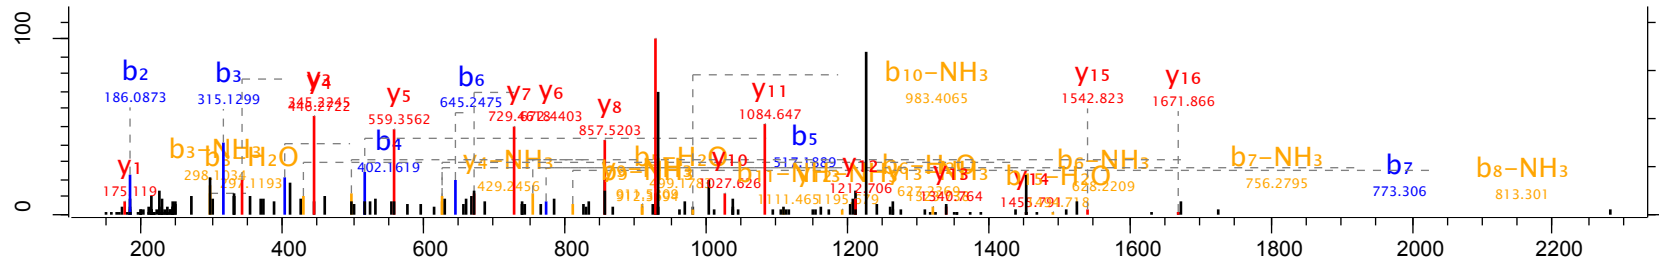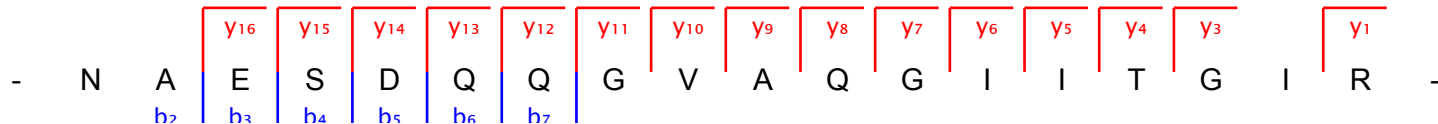

Raw file

20141014\_fract14\_dyn\_5ul\_F6\_01\_593

Scan

30294

Method

TOF; CID

Score

69.85

m/z

813.9

Gene names

PAG1

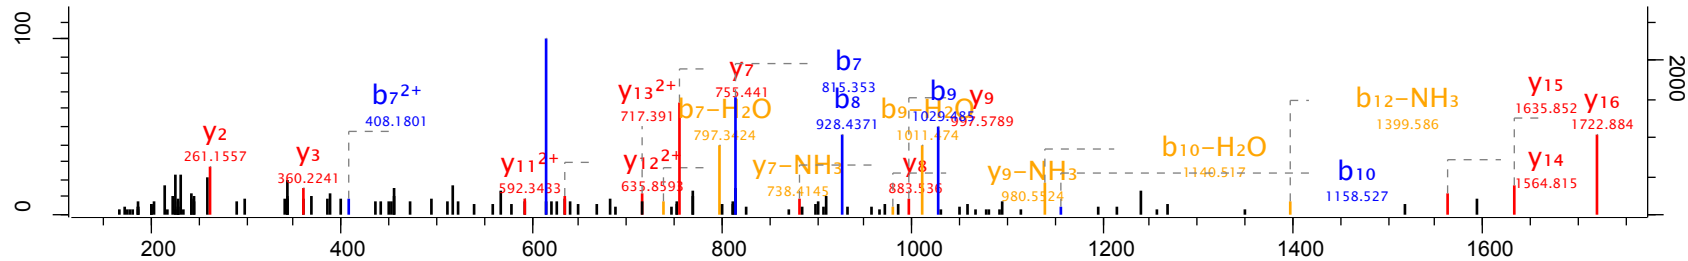

- S R E E D P T L T E E E I S A M Y S S V N

h<sub>5</sub> | h<sub>7</sub> | h<sub>8</sub> | h<sub>9</sub> | h<sub>10</sub>

y<sub>16</sub> | y<sub>15</sub> | y<sub>14</sub> | y<sub>13</sub><sup>2+</sup> | y<sub>12</sub><sup>2+</sup> | y<sub>11</sub><sup>2+</sup> | y<sub>9</sub>

| Raw file                           | Scan  | Method   | Score | m/z    | Gene names |
|------------------------------------|-------|----------|-------|--------|------------|
| 20141014_fract14_dyn_5ul_F6_01_593 | 35876 | TOF; CID | 78.81 | 770.42 | NPL        |

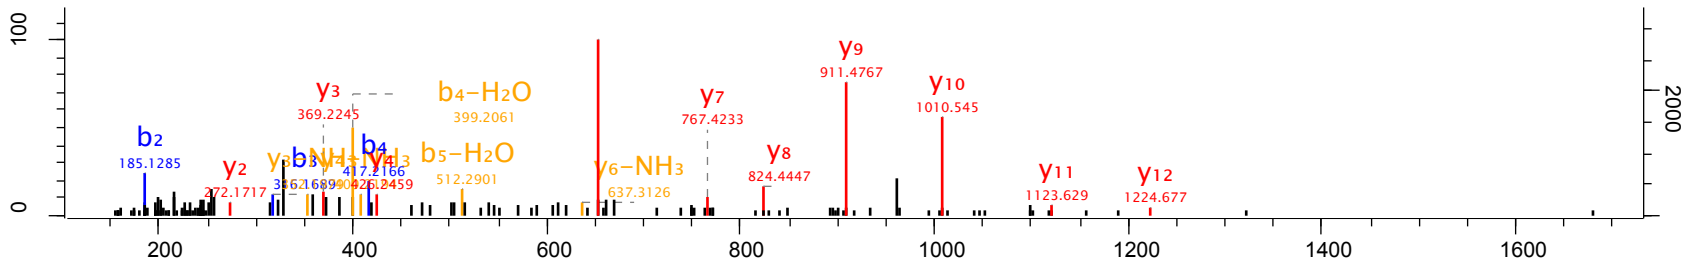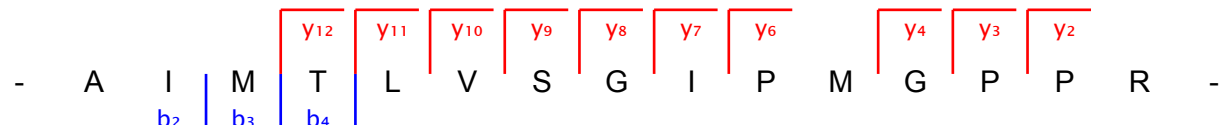



Raw file

20141014\_fract14\_dyn\_5ul\_F6\_01\_593

Scan

35994

Method

TOF; CID

Score

100.02

m/z

837.36

Gene names

PAIP2

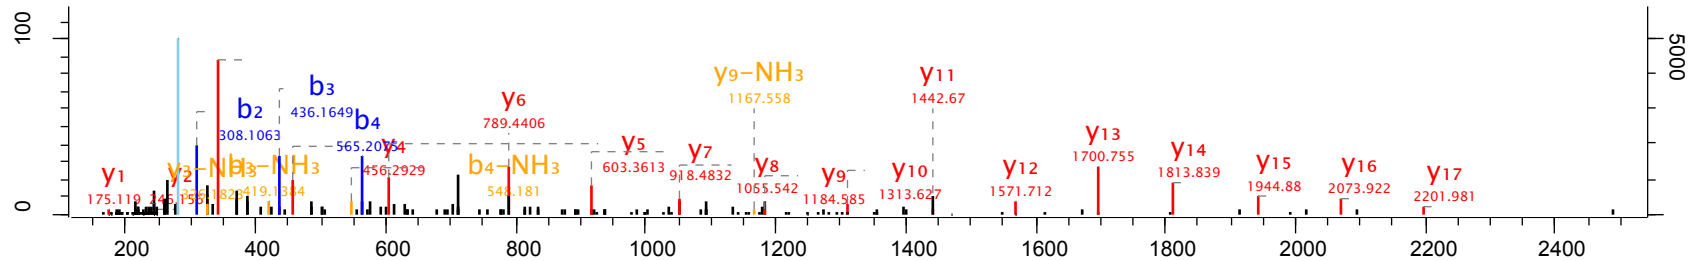

- C F Q E M L E E E E H E W F I P A R -

Fragmentation sites are indicated by red brackets above the sequence, corresponding to the y ions labeled in the spectrum above. Blue brackets below the sequence correspond to the b ions labeled in the spectrum above.

Raw file

20141014\_fract14\_dyn\_5ul\_F6\_01\_593

Scan

36542

Method

TOF; CID

Score

98.16

m/z

588.36

Gene names

KREMEN2

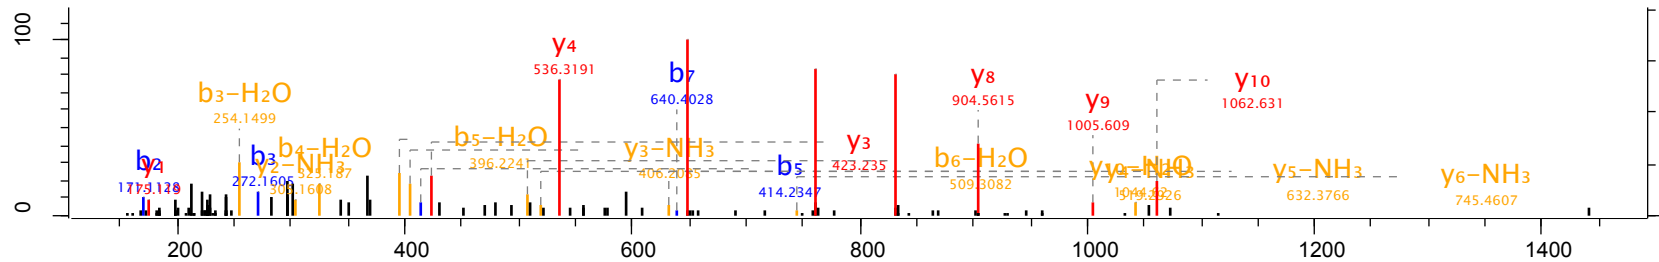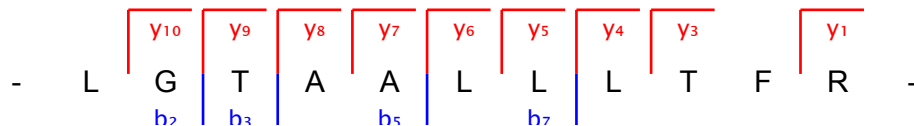

| Raw file                           | Scan  | Method   | Score | m/z   | Gene names |
|------------------------------------|-------|----------|-------|-------|------------|
| 20141014_fract14_dyn_5ul_F6_01_593 | 39070 | TOF; CID | 96.03 | 517.8 | TMEM167A   |

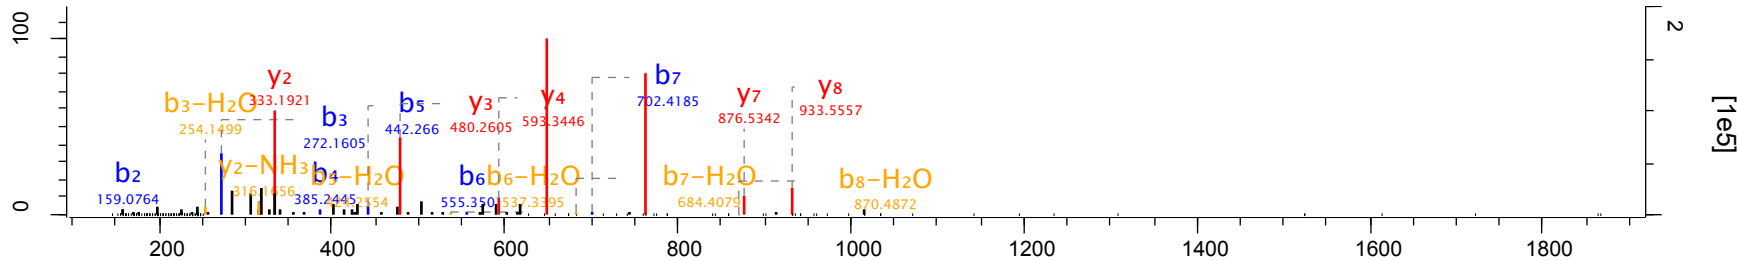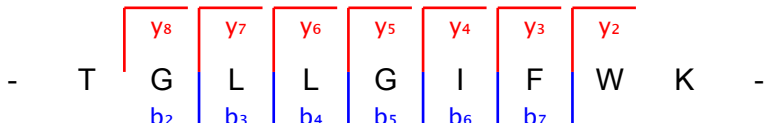

Raw file

20141014\_fract14\_dyn\_5ul\_F6\_01\_593

Scan

39365

Method

TOF; CID

Score

74.17

m/z

579.31

Gene names

FAM184B

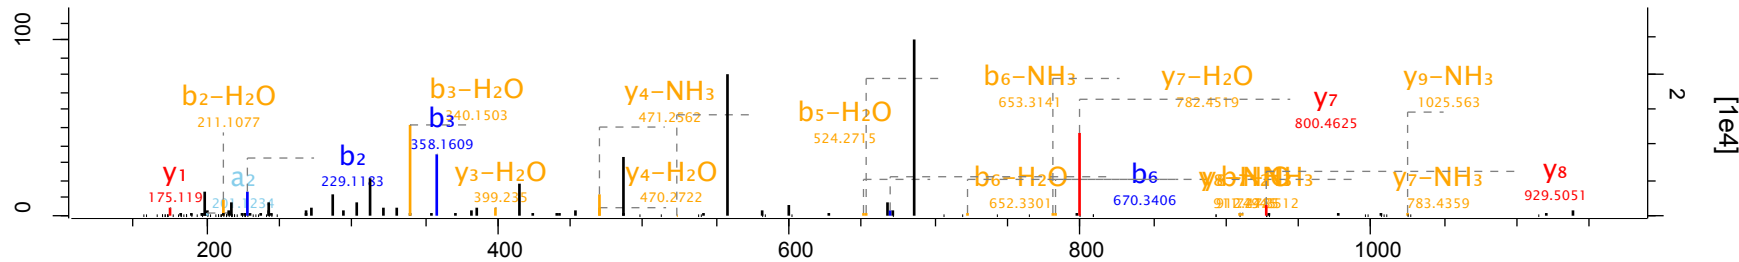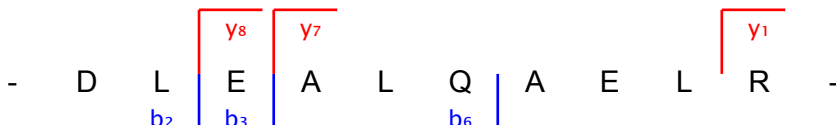

Raw file

20141014\_fract15\_dyn\_5ul\_F7\_01\_594

Scan

13920

Method

TOF; CID

Score

69.37

m/z

521.3

Gene names

CCDC17

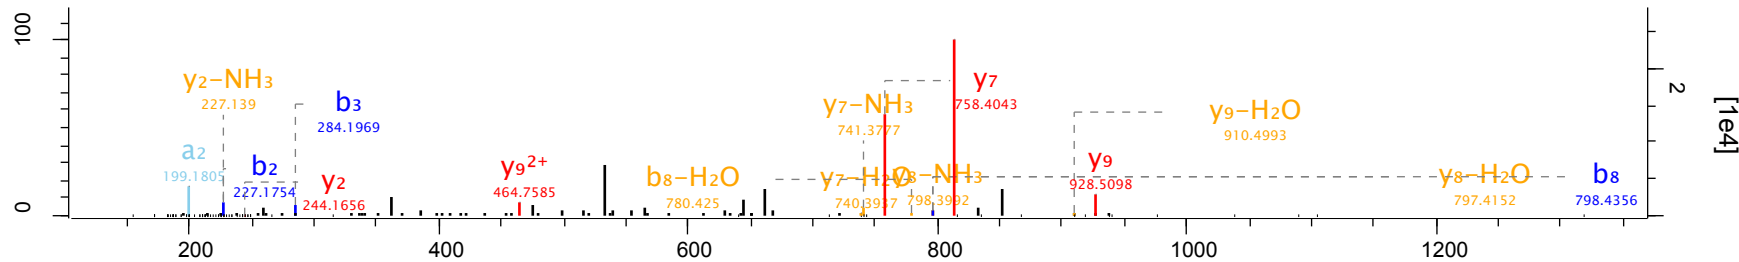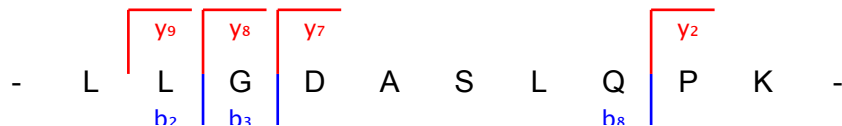

| Raw file                           | Scan  | Method   | Score | m/z    | Gene names |
|------------------------------------|-------|----------|-------|--------|------------|
| 20141014_fract15_dyn_5ul_F7_01_594 | 20708 | TOF; CID | 99.01 | 524.28 | COX7C      |

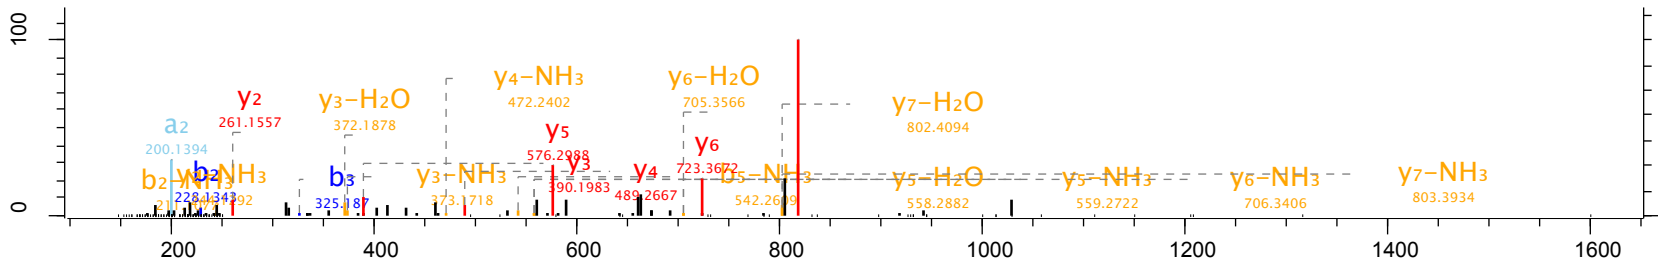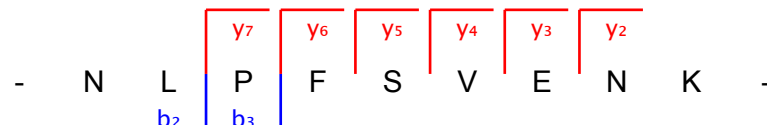

[1e4]

Raw file

20141014\_fract15\_dyn\_5ul\_F7\_01\_594

Scan

24123

Method

TOF; CID

Score

69.03

m/z

691.34

Gene names

TMEM164;RP13-360B22.2

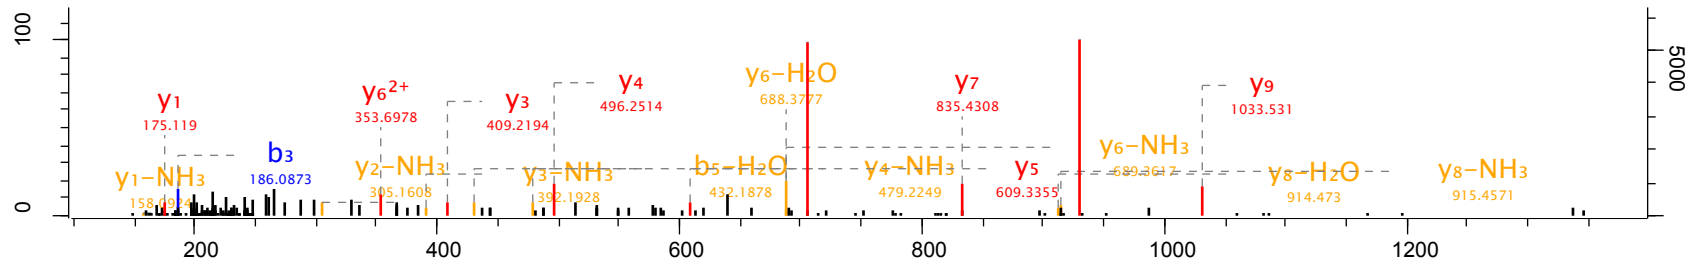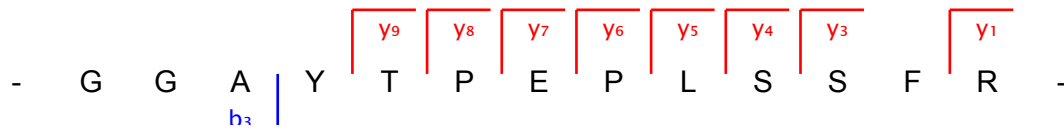

| Raw file                           | Scan  | Method   | Score | m/z    | Gene names |
|------------------------------------|-------|----------|-------|--------|------------|
| 20141014_fract15_dyn_5ul_F7_01_594 | 30946 | TOF; CID | 63.73 | 916.95 | TNIP3      |

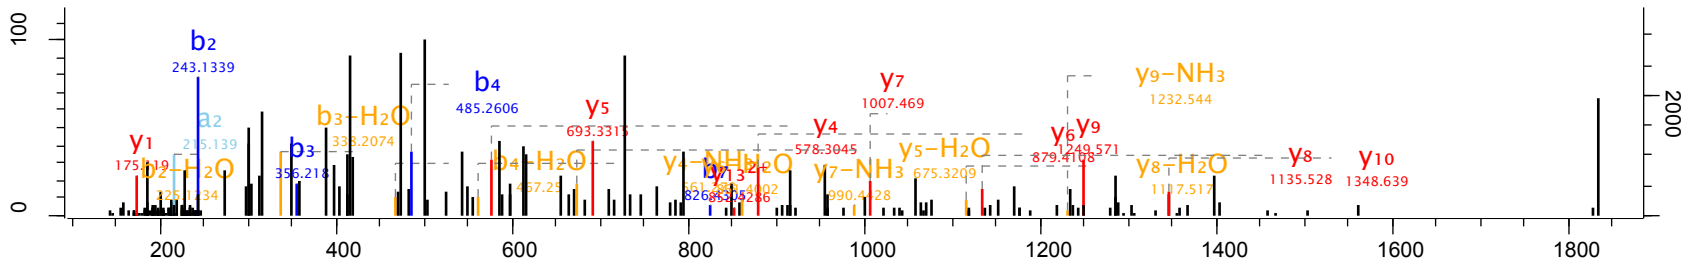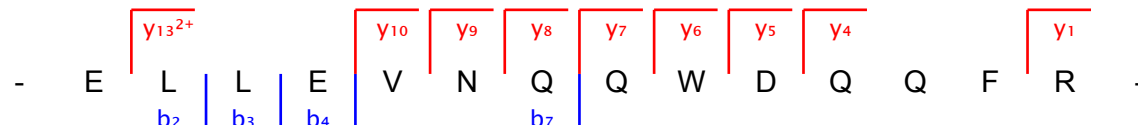



Raw file  
 20141014\_fract15\_dyn\_5ul\_F7\_01\_594  
 Scan 32768 Method TOF; CID Score 54.86 m/z 920.93 Gene names DEAF1

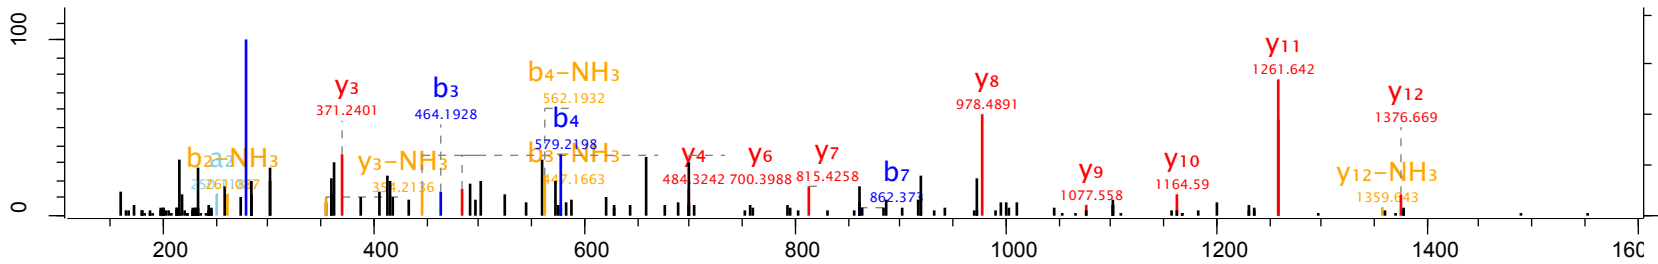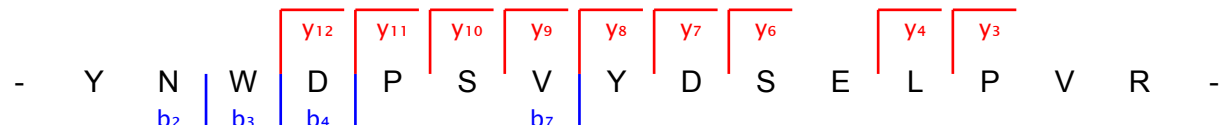

Raw file

20141014\_fract15\_dyn\_5ul\_F7\_01\_594

Scan

34288

Method

TOF; CID

Score

88.39

m/z

935.51

Gene names

VAMP1

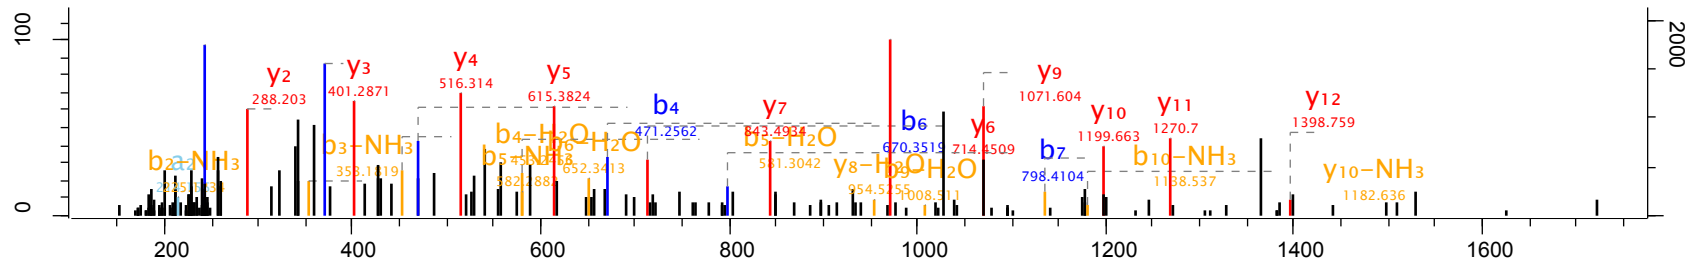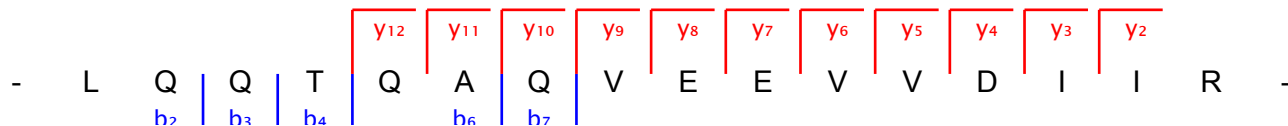

Raw file

20141014\_fract15\_dyn\_5ul\_F7\_01\_594

Scan

34743

Method

TOF; CID

Score

119.62

m/z

806.9

Gene names

NIPA1

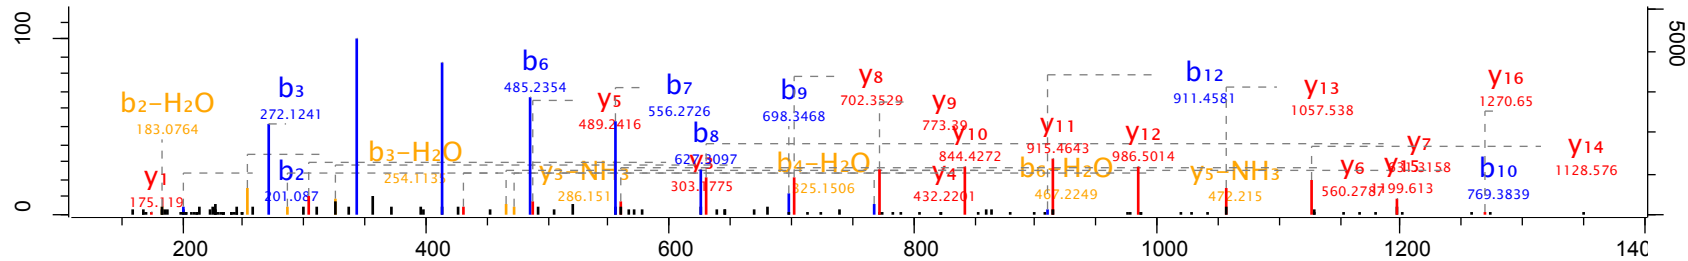

ac

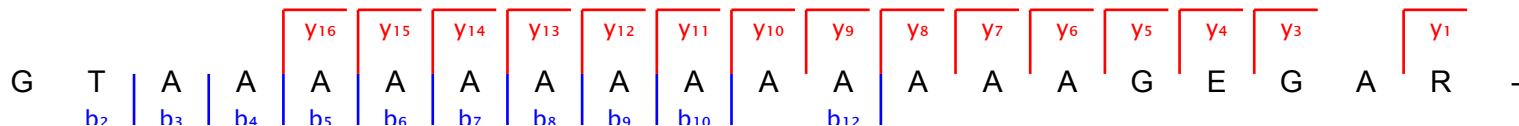

Raw file

20141014\_fract15\_dyn\_5ul\_F7\_01\_594

Scan

36642

Method

TOF; CID

Score

90.86

m/z

741.41

Gene names

VAV3

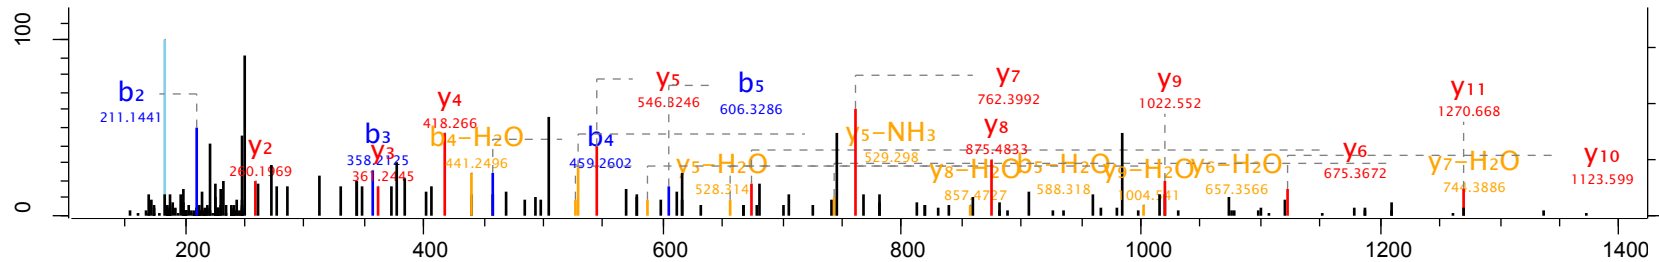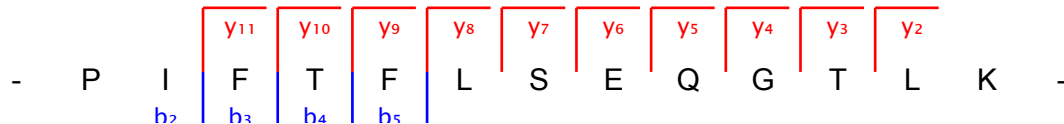

Raw file

20141014\_fract15\_dyn\_5ul\_F7\_01\_594

Scan

39052

Method

TOF; CID

Score

91.66

m/z

630.99

Gene names

CSAD

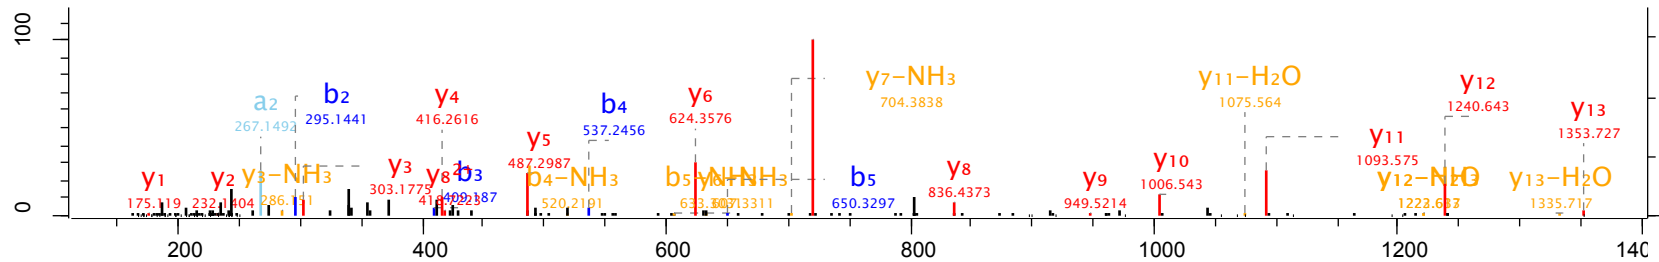

[1e4]

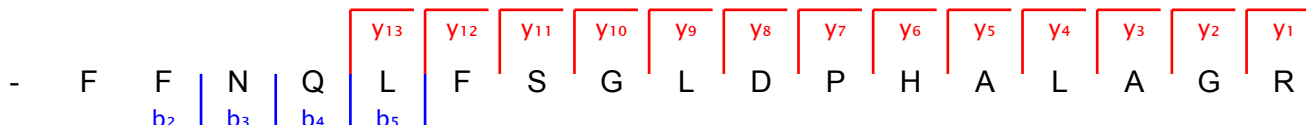

Raw file

20141014\_fract15\_dyn\_5ul\_F7\_01\_594

Scan

41392

Method

TOF; CID

Score

86.8

m/z

1029.03

Gene names

SLC50A1

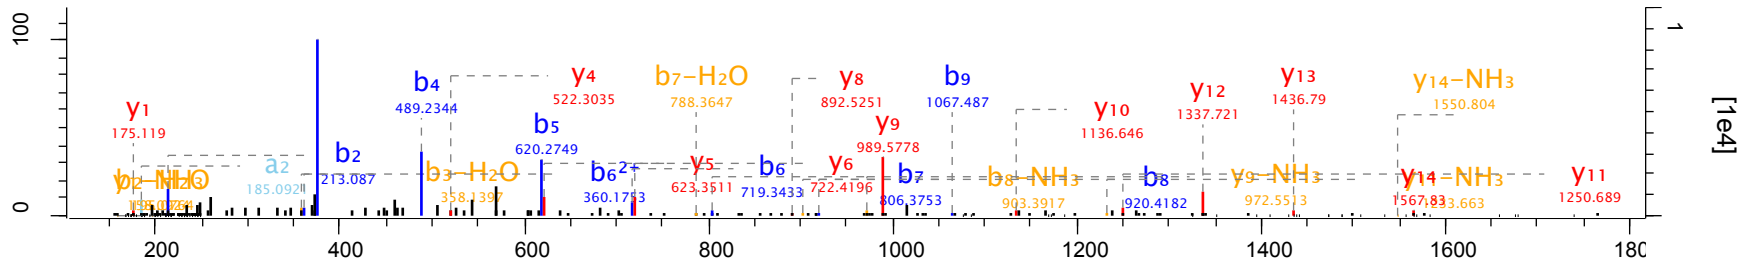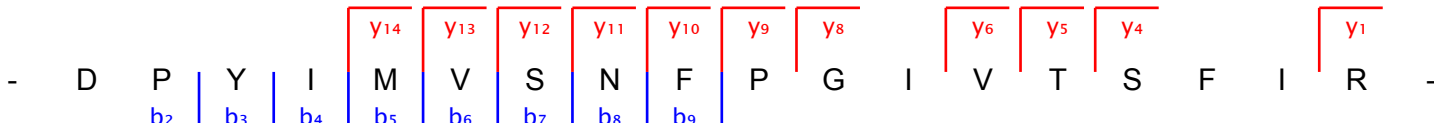

Raw file

20141014\_fract16\_dyn\_5ul\_F8\_01\_595

Scan

8984

Method

TOF; CID

Score

94.4

m/z

637.81

Gene names

FUNDC1

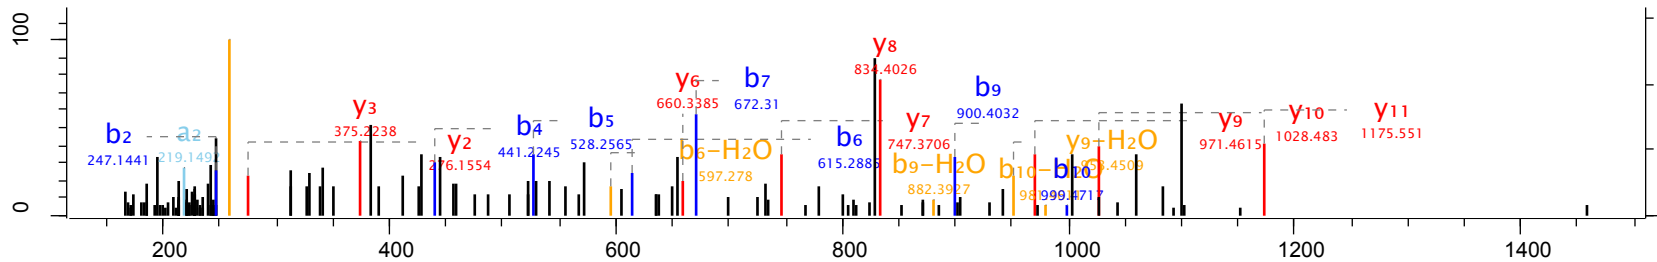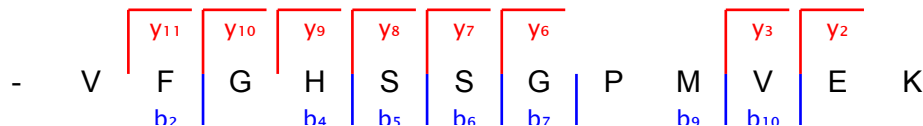

| Raw file                           | Scan  | Method   | Score | m/z   | Gene names |
|------------------------------------|-------|----------|-------|-------|------------|
| 20141014_fract16_dyn_5ul_F8_01_595 | 13765 | TOF; CID | 88.5  | 522.8 | TRAF5      |

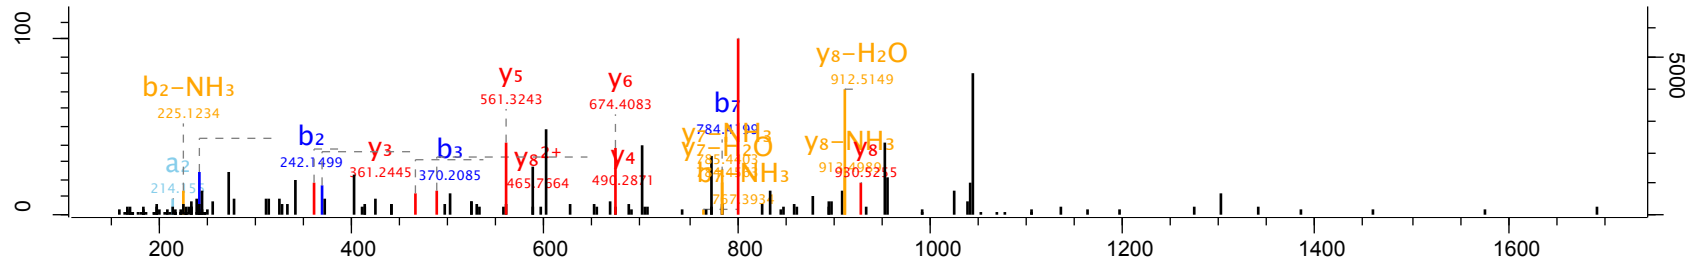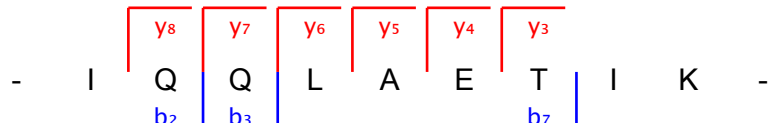



| Raw file                           | Scan  | Method   | Score | m/z    | Gene names |
|------------------------------------|-------|----------|-------|--------|------------|
| 20141014_fract16_dyn_5ul_F8_01_595 | 15101 | TOF; CID | 65.28 | 631.78 | CRLS1      |

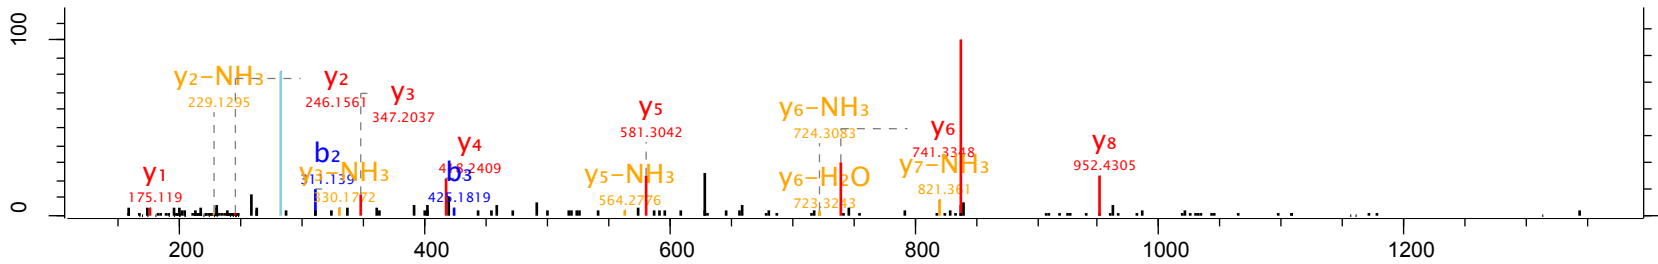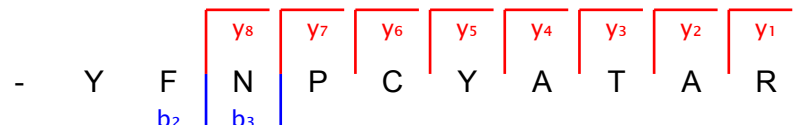

Raw file

20141014\_fract16\_dyn\_5ul\_F8\_01\_595

Scan

15536

Method

TOF; CID

Score

61.41

m/z

504.27

Gene names

ZNF385A;SOX6

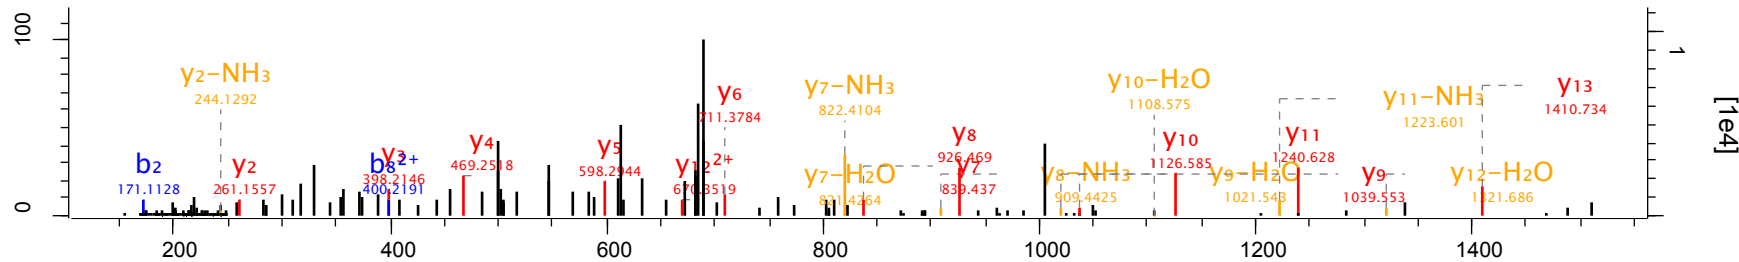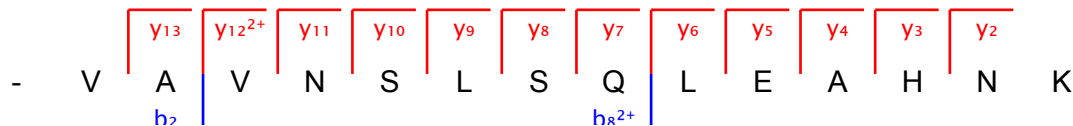

Raw file

20141014\_fract16\_dyn\_5ul\_F8\_01\_595

Scan

15923

Method

TOF; CID

Score

89.43

m/z

602.33

Gene names

DAZAP2

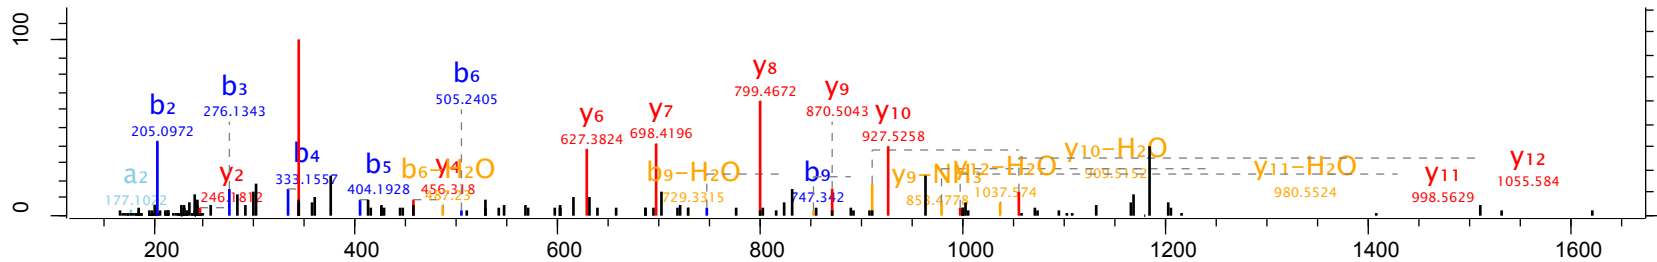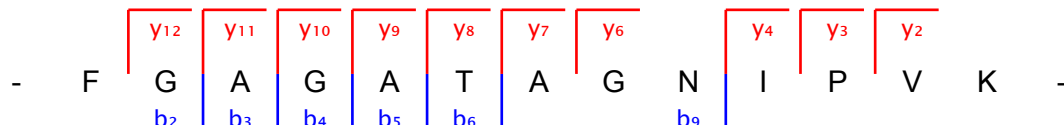

Raw file

20141014\_fract16\_dyn\_5ul\_F8\_01\_595

Scan

18528

Method

TOF; CID

Score

104.26

m/z

705.36

Gene names

TMEM69

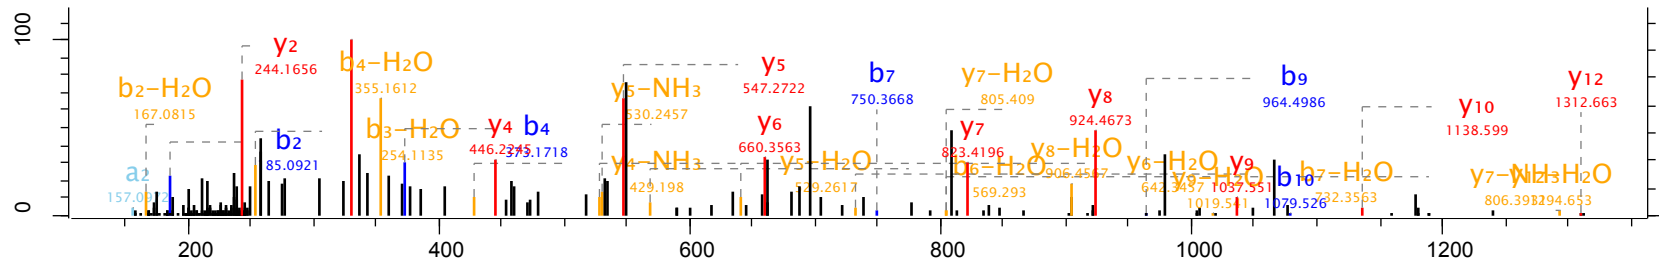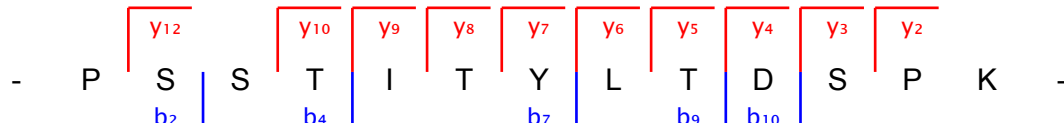

Raw file

20141014\_fract16\_dyn\_5ul\_F8\_01\_595

Scan

19533

Method

TOF; CID

Score

68.95

m/z

1007.49

Gene names

TMEM243

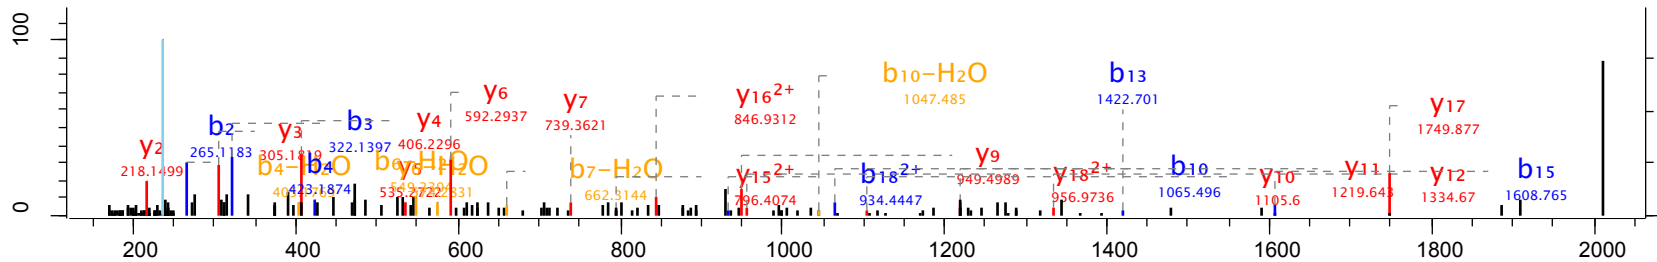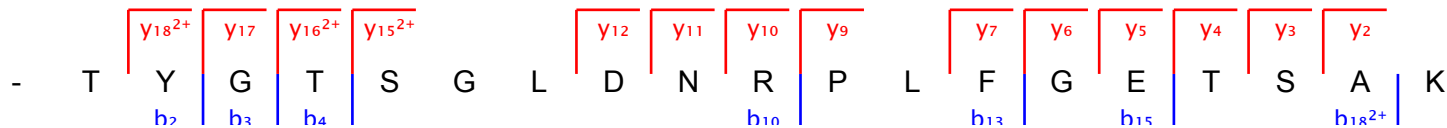

| Raw file                           | Scan  | Method   | Score | m/z    | Gene names |
|------------------------------------|-------|----------|-------|--------|------------|
| 20141014_fract16_dyn_5ul_F8_01_595 | 20390 | TOF; CID | 78.51 | 709.89 | DIRC2      |

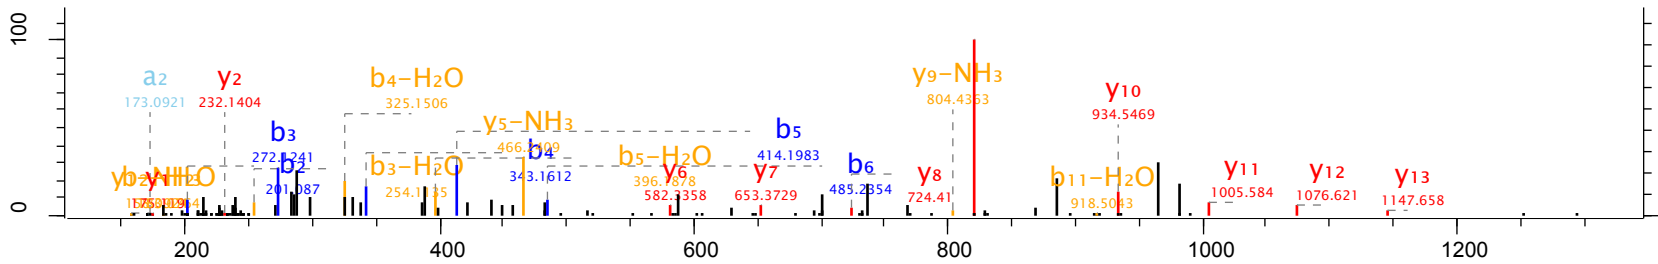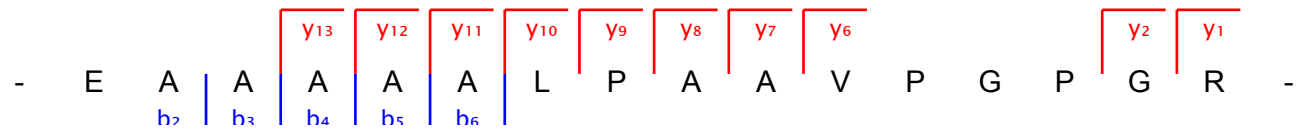

Raw file

20141014\_fract16\_dyn\_5ul\_F8\_01\_595

Scan

25303

Method

TOF; CID

Score

72.21

m/z

730.38

Gene names

DMBT1

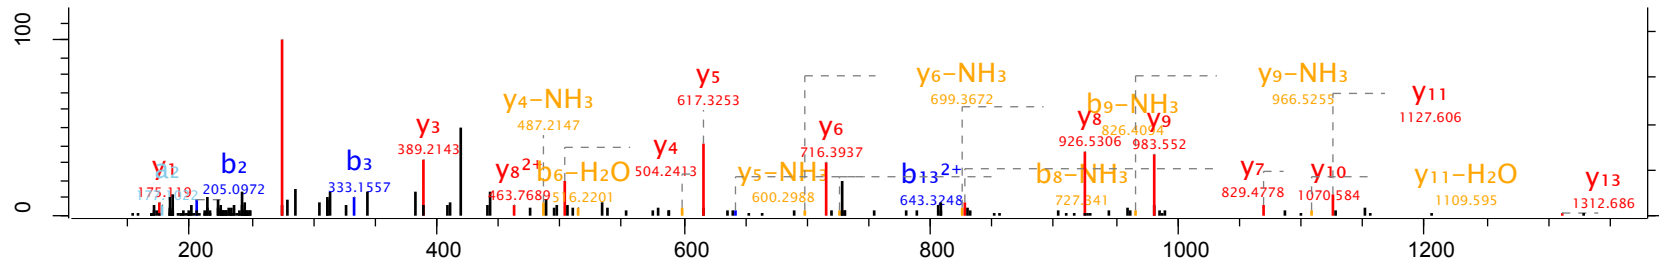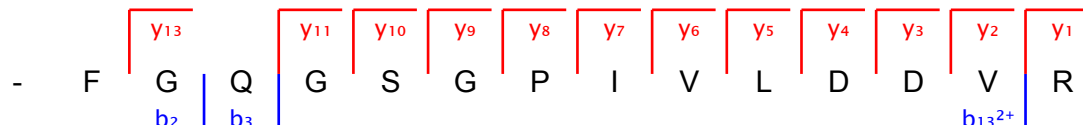

Raw file

20141014\_fract16\_dyn\_5ul\_F8\_01\_595

Scan

28148

Method

TOF; CID

Score

81.97

m/z

1010.09

Gene names

FAM199X

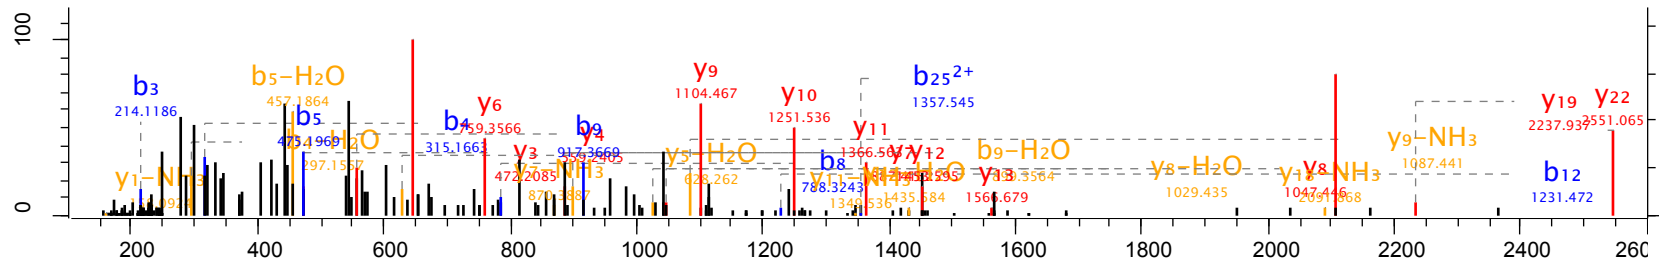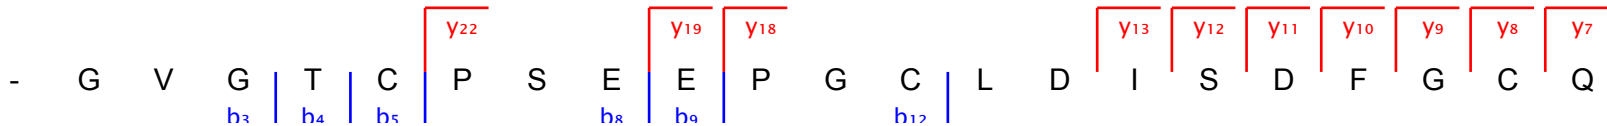



Raw file

20141014\_fract16\_dyn\_5ul\_F8\_01\_595

Scan

32575

Method

TOF; CID

Score

91.4

m/z

955.46

Gene names

CEP350

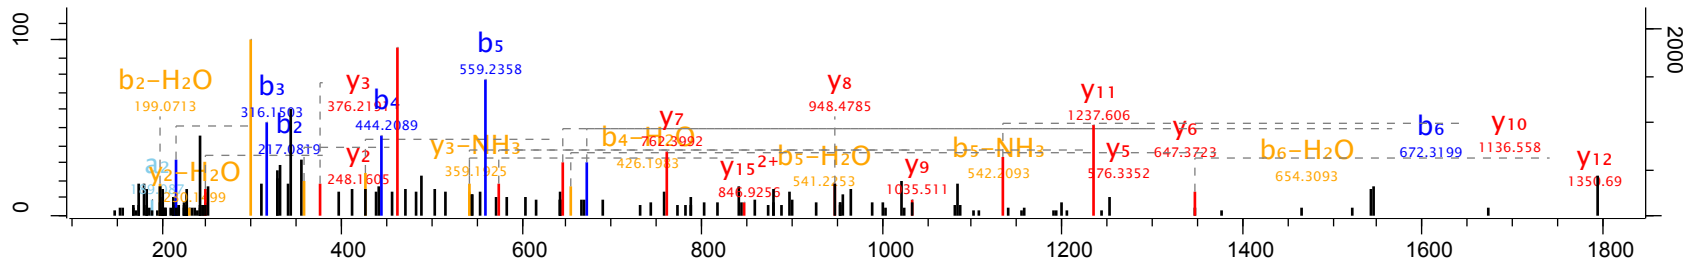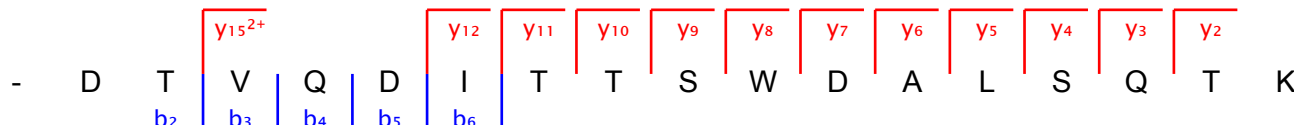

Raw file

20141014\_fract16\_dyn\_5ul\_F8\_01\_595

Scan

34265

Method

TOF; CID

Score

59.37

m/z

860.4

Gene names

SWI5

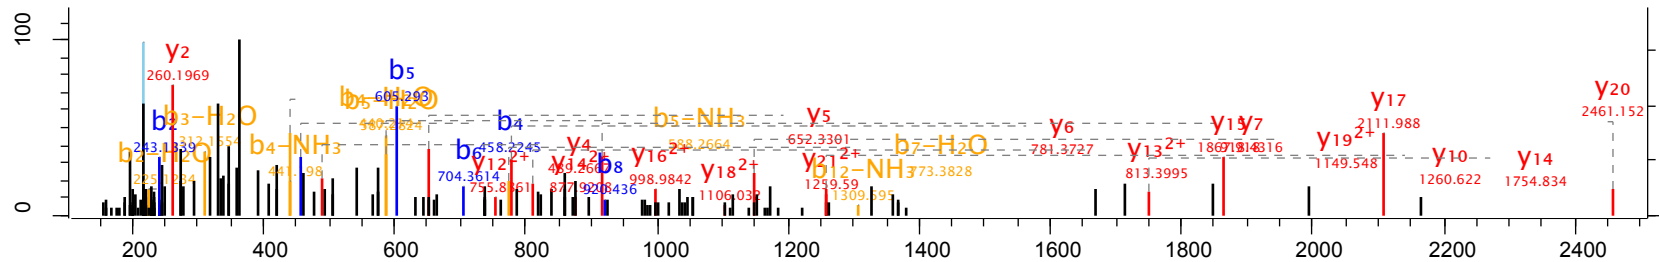

- E I S Q F V S E G Y S V D E L E D H I T Q

h<sub>2</sub> h<sub>4</sub> h<sub>5</sub> h<sub>6</sub> h<sub>8</sub>

y<sub>21</sub><sup>2+</sup> y<sub>20</sub> y<sub>19</sub><sup>2+</sup> y<sub>18</sub><sup>2+</sup> y<sub>17</sub> y<sub>16</sub><sup>2+</sup> y<sub>15</sub> y<sub>14</sub> y<sub>13</sub><sup>2+</sup> y<sub>12</sub><sup>2+</sup> y<sub>10</sub>

| Raw file                           | Scan  | Method   | Score | m/z    | Gene names |
|------------------------------------|-------|----------|-------|--------|------------|
| 20141014_fract16_dyn_5ul_F8_01_595 | 37267 | TOF; CID | 66.83 | 898.01 | R3HDM4     |

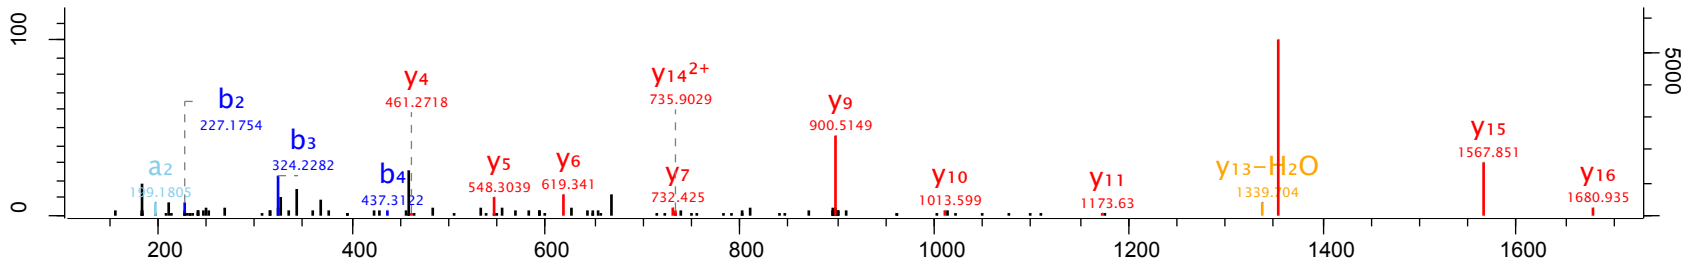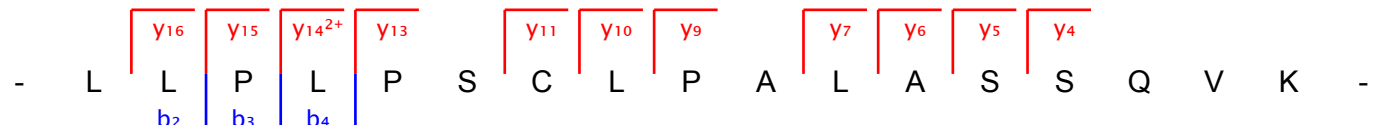

Raw file

Scan

Method

Score

m/z

Gene names

20141014\_fract17\_dyn\_5ul\_G1\_01\_596

11851

TOF; CID

110.08

689.87

FBXO33

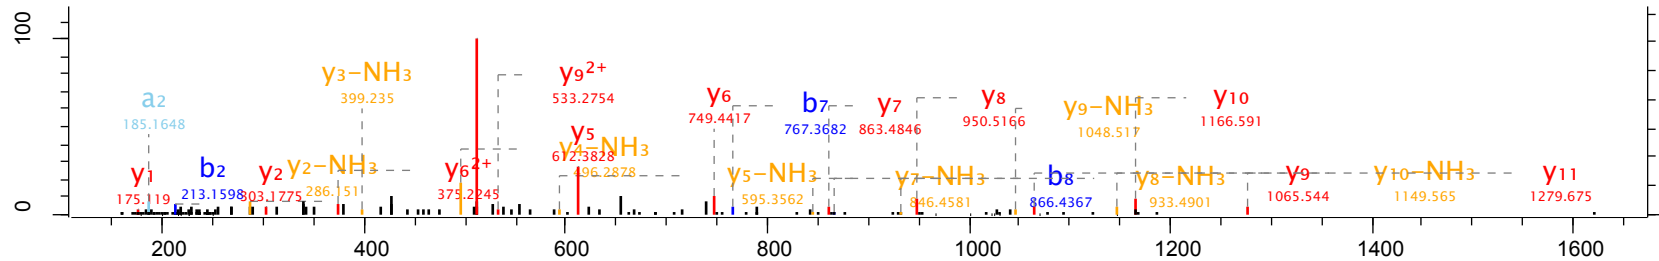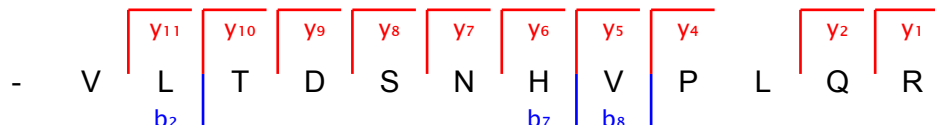

| Raw file                           | Scan  | Method   | Score | m/z    | Gene names |
|------------------------------------|-------|----------|-------|--------|------------|
| 20141014_fract17_dyn_5ul_G1_01_596 | 19333 | TOF; CID | 91.96 | 553.79 | C19orf43   |

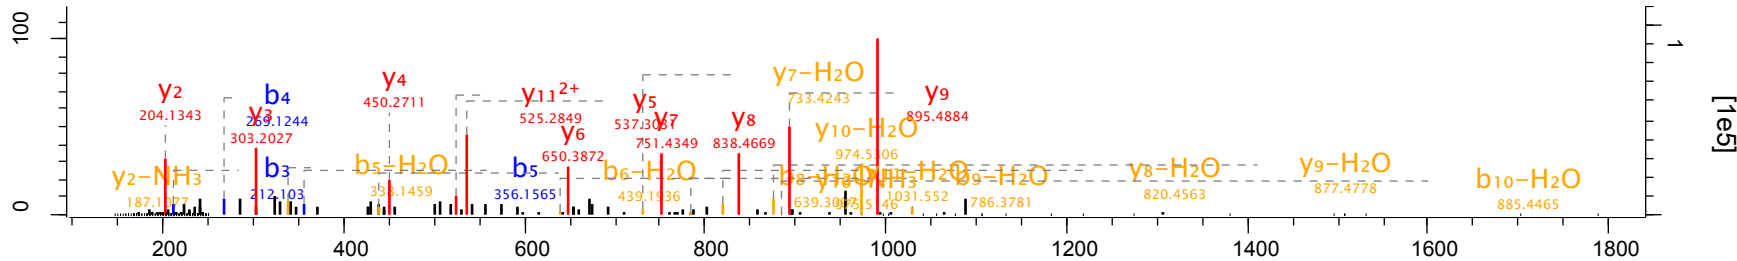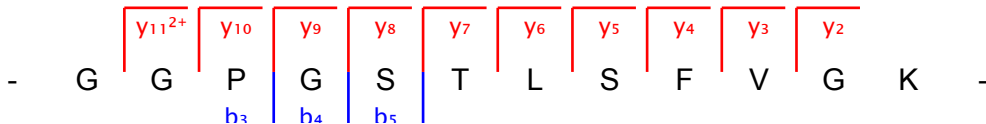

Raw file

20141014\_fract17\_dyn\_5ul\_G1\_01\_596

Scan

20256

Method

TOF; CID

Score

52.17

m/z

563.64

Gene names

ELF4

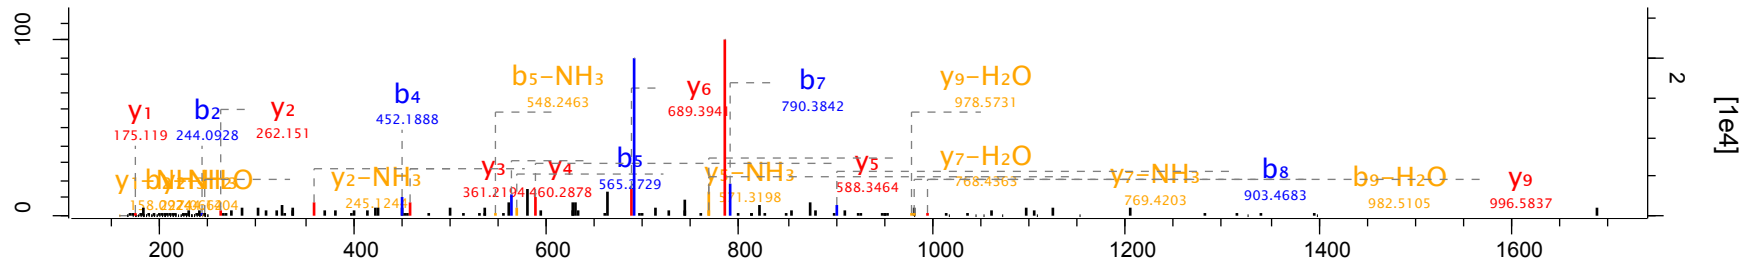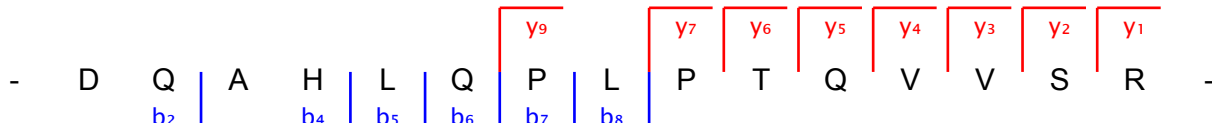

Raw file

Scan

Method

Score

m/z

Gene names

20141014\_fract17\_dyn\_5ul\_G1\_01\_596

23450

TOF; CID

79.28

622.34

PEX2

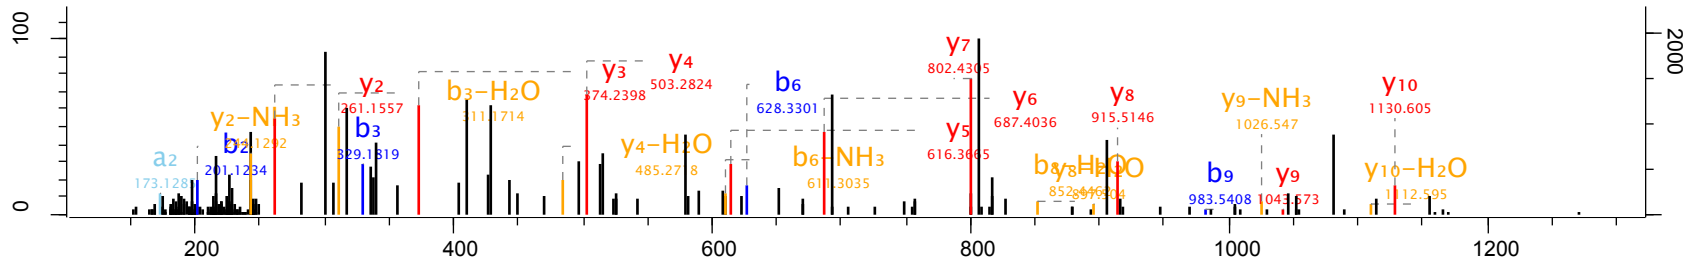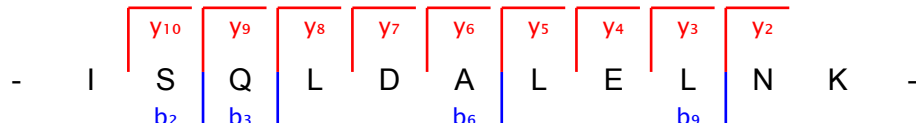

Raw file

Scan

Method

Score

m/z

Gene names

20141014\_fract17\_dyn\_5ul\_G1\_01\_596

23528

TOF; CID

62.03

813.07

LHFPL2

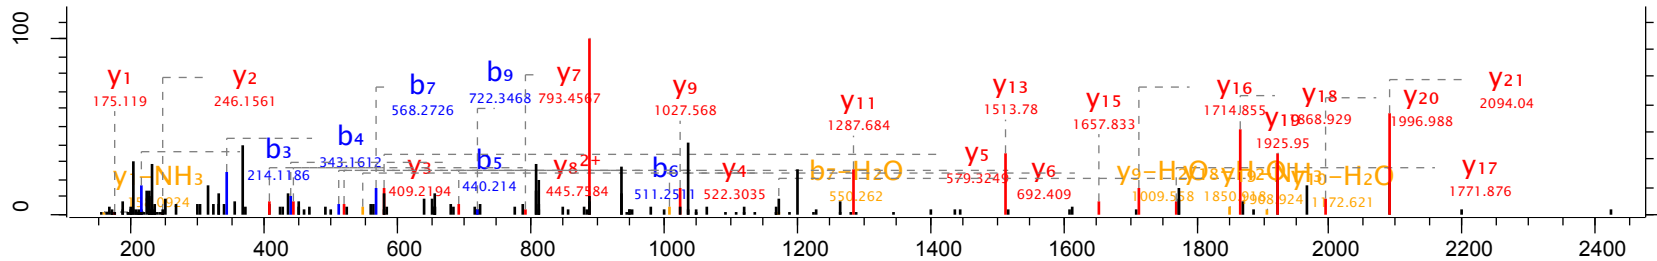

- G G V E P A G P G G G S P E P Y H P T L G

h<sub>3</sub> h<sub>4</sub> h<sub>5</sub> h<sub>6</sub> h<sub>7</sub> h<sub>9</sub>

y<sub>21</sub> y<sub>20</sub> y<sub>19</sub> y<sub>18</sub> y<sub>17</sub> y<sub>16</sub> y<sub>15</sub> y<sub>13</sub> y<sub>11</sub> y<sub>9</sub> y<sub>8</sub> y<sub>7</sub> y<sub>6</sub> y<sub>5</sub>



Raw file

20141014\_fract17\_dyn\_5ul\_G1\_01\_596

Scan

23833

Method

TOF; CID

Score

98.16

m/z

587.81

Gene names

SYNGR3

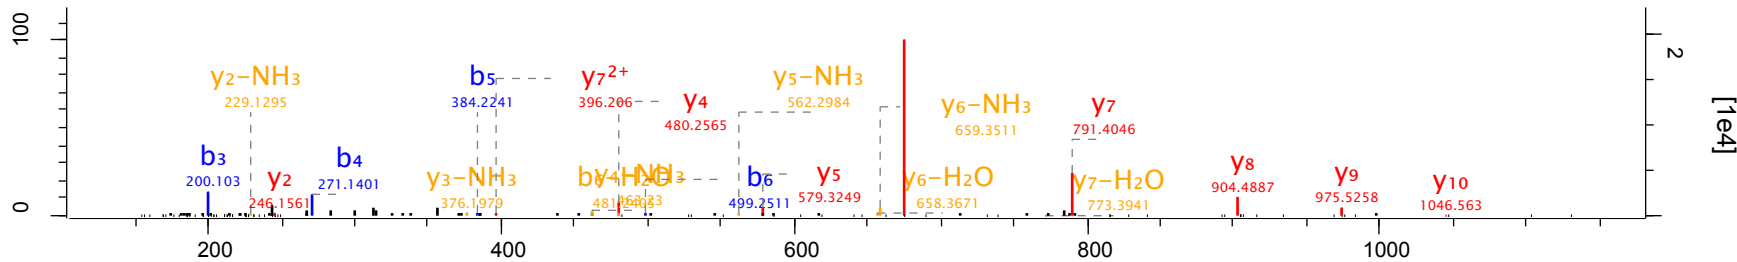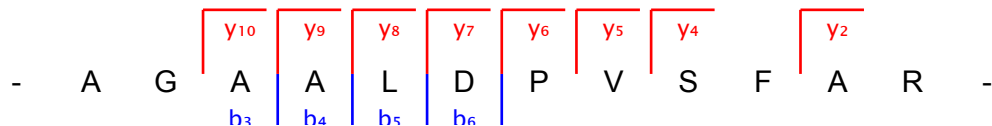

Raw file

Scan

Method

Score

m/z

Gene names

20141014\_fract17\_dyn\_5ul\_G1\_01\_596

27158

TOF; CID

64

930.47

HIAT1

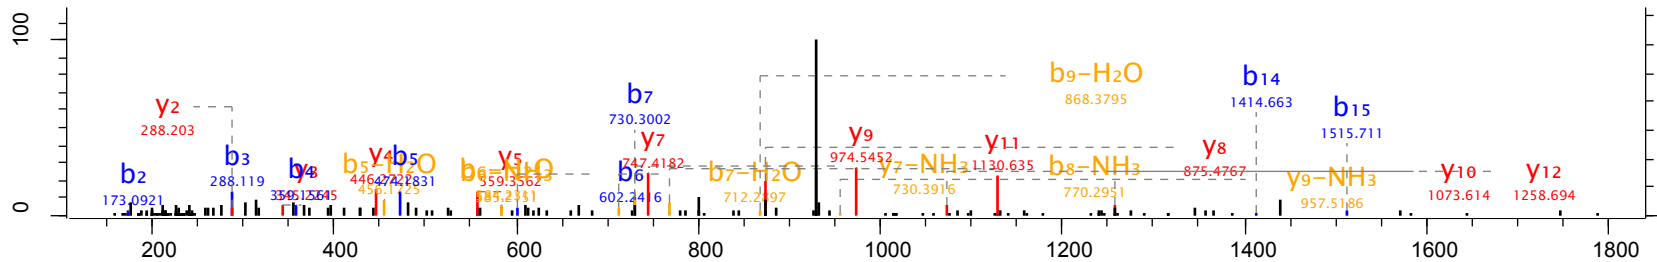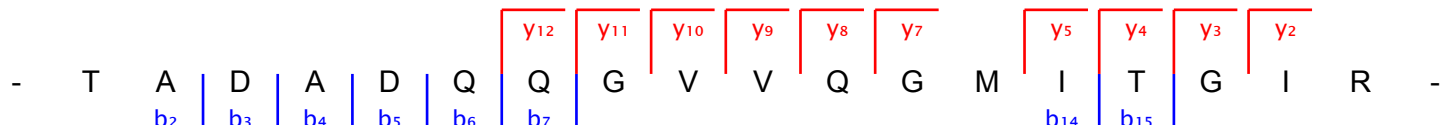

| Raw file                           | Scan  | Method   | Score | m/z   | Gene names |
|------------------------------------|-------|----------|-------|-------|------------|
| 20141014_fract17_dyn_5ul_G1_01_596 | 27778 | TOF; CID | 58.89 | 862.4 | PSENN      |

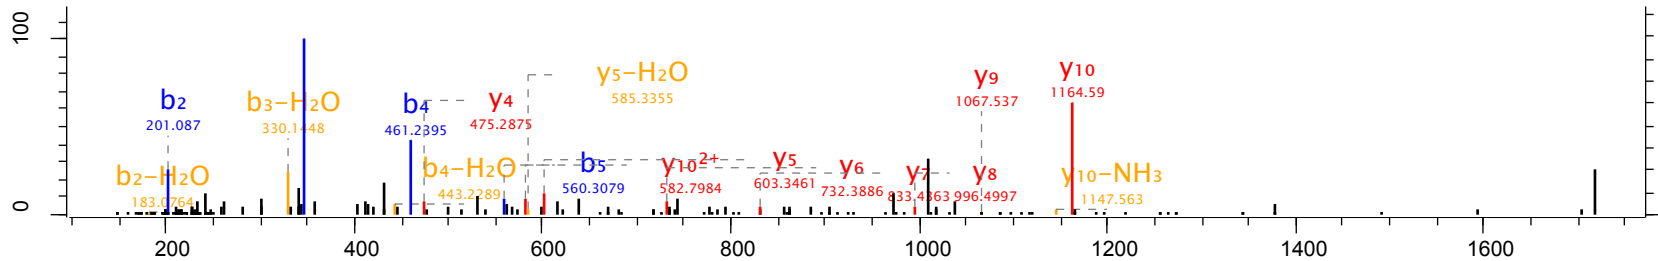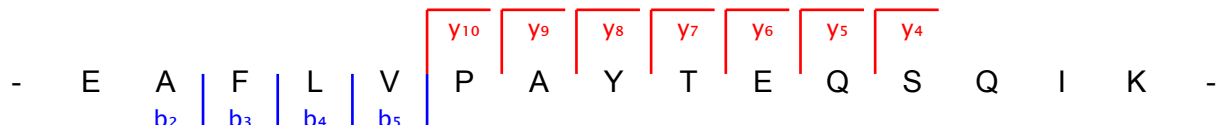

Raw file

20141014\_fract17\_dyn\_5ul\_G1\_01\_596

Scan

29706

Method

TOF; CID

Score

67.88

m/z

848.91

Gene names

WDR65

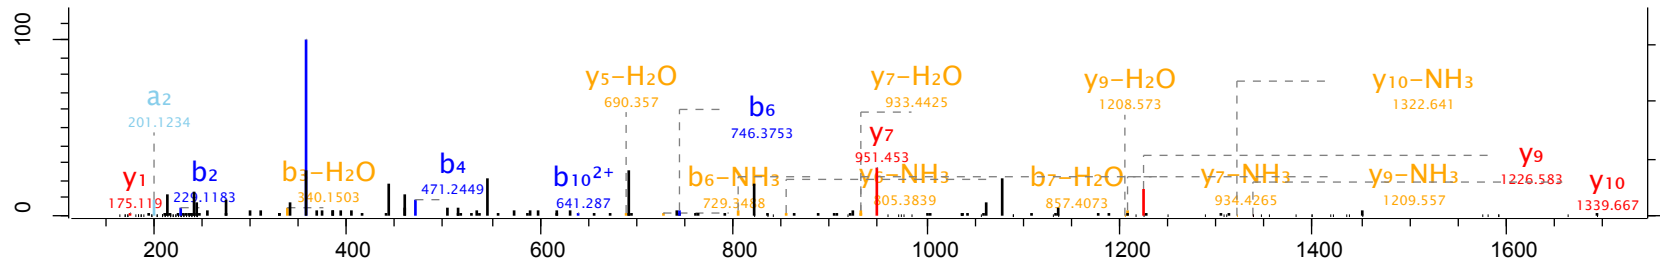

[1e4]

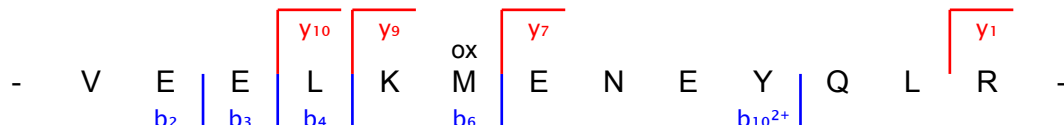

Raw file

20141014\_fract17\_dyn\_5ul\_G1\_01\_596

Scan

31561

Method

TOF; CID

Score

53.24

m/z

712.84

Gene names

DUSP18

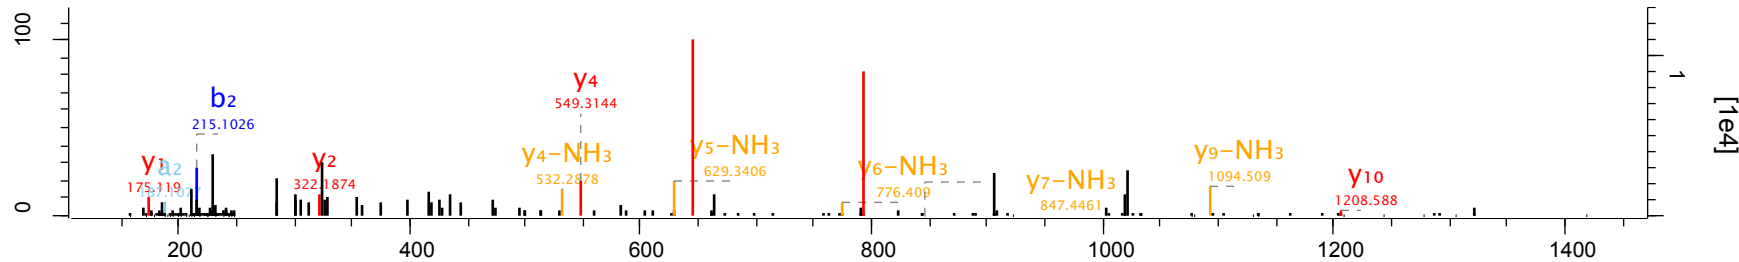

ac

T A P S C A F P V Q F R -

b2

y10

y6

y5

y4

y2

y1

| Raw file                           | Scan  | Method   | Score  | m/z     | Gene names |
|------------------------------------|-------|----------|--------|---------|------------|
| 20141014_fract17_dyn_5ul_G1_01_596 | 34721 | TOF; CID | 149.73 | 1007.98 | TMEM106C   |

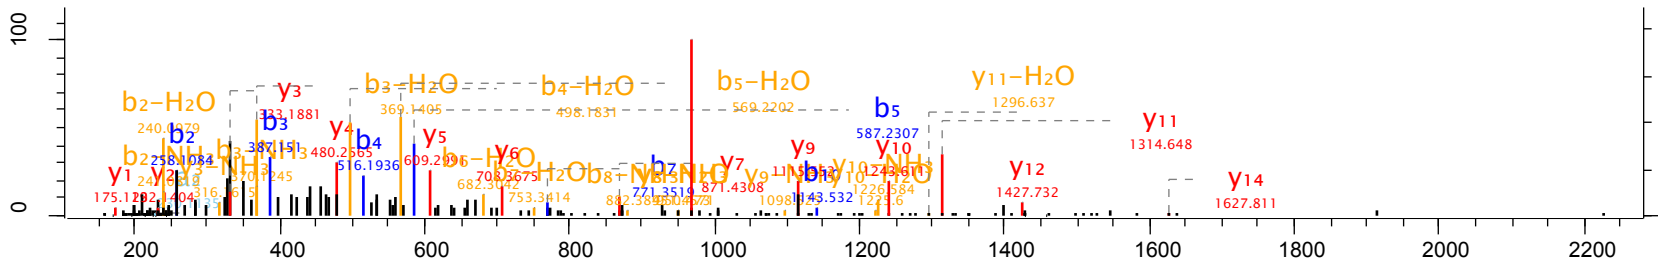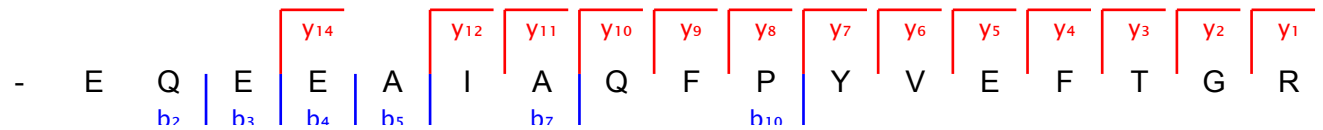

Raw file

20141014\_fract17\_dyn\_5ul\_G1\_01\_596

Scan

36308

Method

TOF; CID

Score

38.72

m/z

743.38

Gene names

ZNF512B

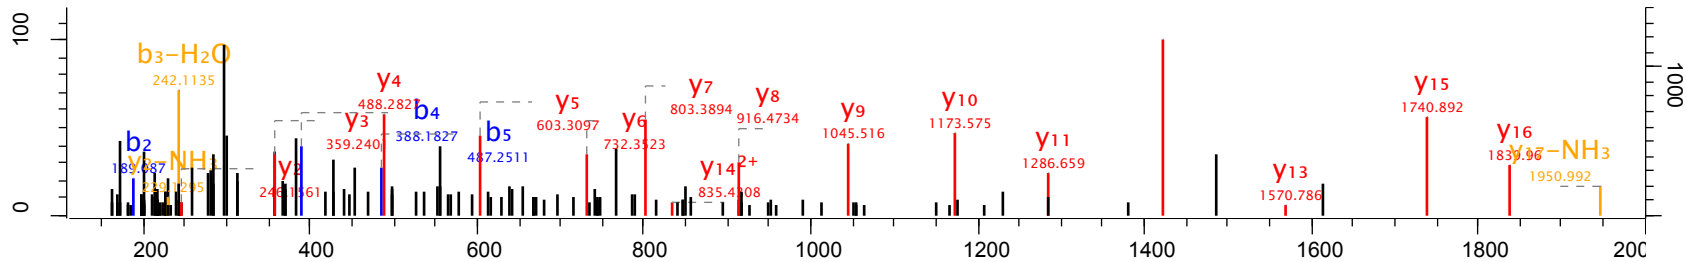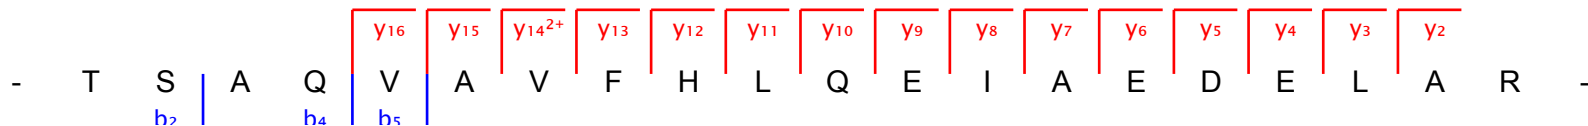

Raw file

20141014\_fract17\_dyn\_5ul\_G1\_01\_596

Scan

38062

Method

TOF; CID

Score

52.46

m/z

1240.52

Gene names

RNF11

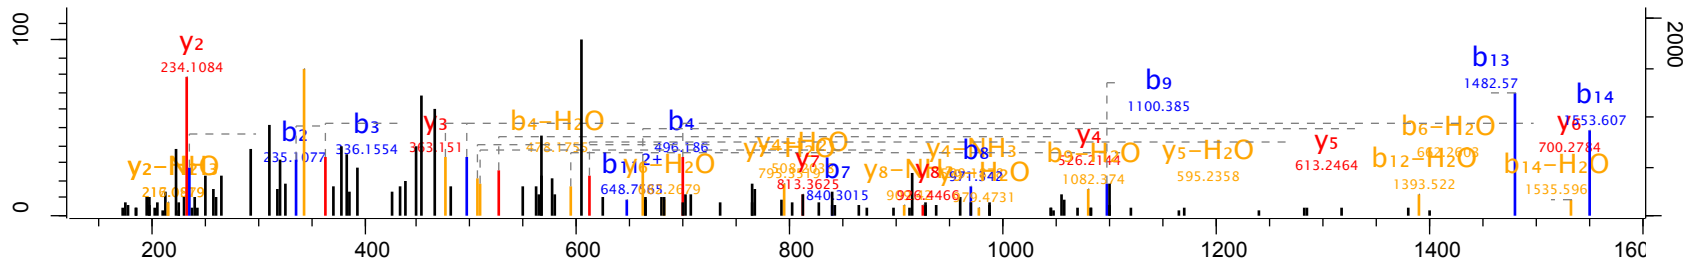

- S F T C P S C M E P V D A A L L S S Y E T

$b_2$  |  $b_3$  |  $b_4$  |  $b_7$  |  $b_8$  |  $b_9$  |  $b_{11}^{2+}$  |  $b_{13}$  |  $b_{14}$

$y_8$  |  $y_7$  |  $y_6$  |  $y_5$  |  $y_4$  |  $y_3$  |  $y_2$



Raw file

Scan

Method

Score

m/z

Gene names

20141014\_fract18\_dyn\_5ul\_G2\_01\_597

8120

TOF; CID

56.2

457.24

ZFP62

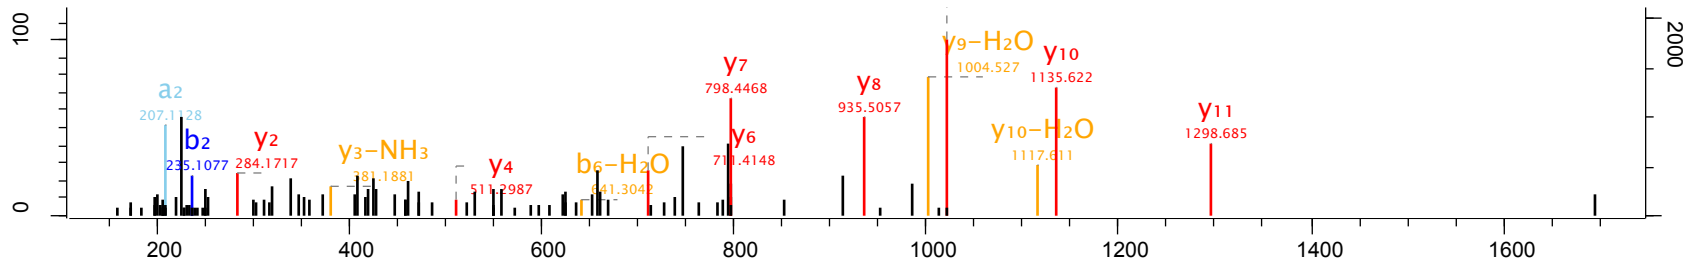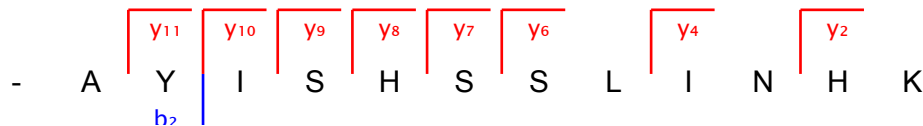

| Raw file                           | Scan  | Method   | Score | m/z    | Gene names |
|------------------------------------|-------|----------|-------|--------|------------|
| 20141014_fract18_dyn_5ul_G2_01_597 | 12482 | TOF; CID | 80.23 | 487.78 | CENPW      |

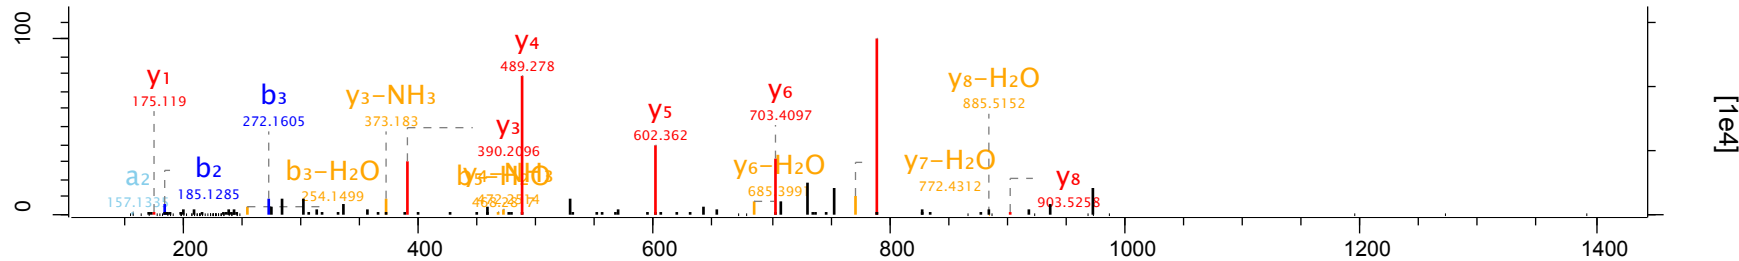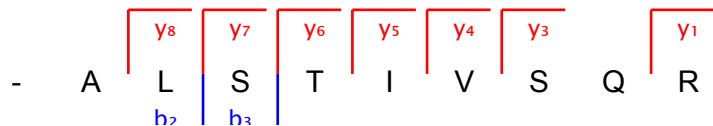

| Raw file                           | Scan  | Method   | Score  | m/z    | Gene names |
|------------------------------------|-------|----------|--------|--------|------------|
| 20141014_fract18_dyn_5ul_G2_01_597 | 16907 | TOF; CID | 106.04 | 494.79 | GPNMB      |

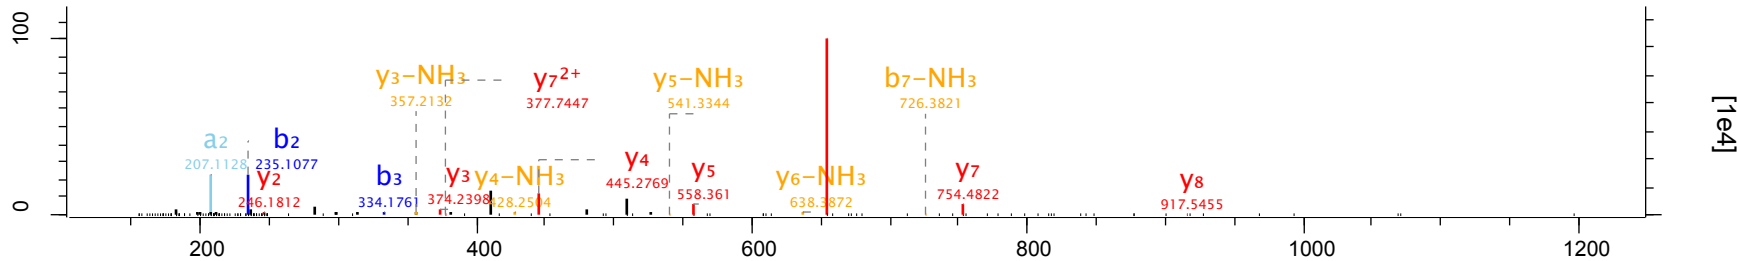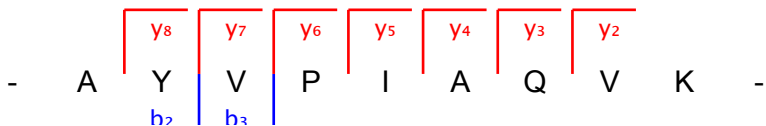

| Raw file                           | Scan  | Method   | Score  | m/z    | Gene names |
|------------------------------------|-------|----------|--------|--------|------------|
| 20141014_fract18_dyn_5ul_G2_01_597 | 17983 | TOF; CID | 120.92 | 476.24 | MAPK15     |

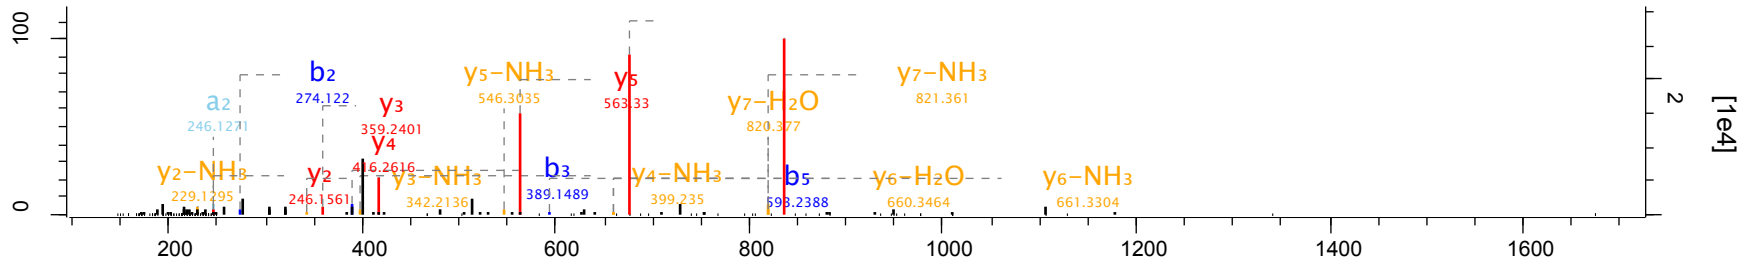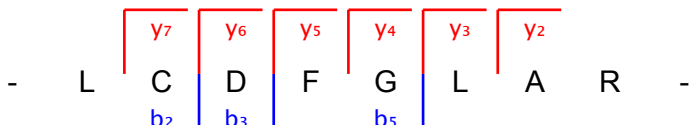

Raw file

20141014\_fract18\_dyn\_5ul\_G2\_01\_597

Scan

23835

Method

TOF; CID

Score

83.95

m/z

542.78

Gene names

HCLS1

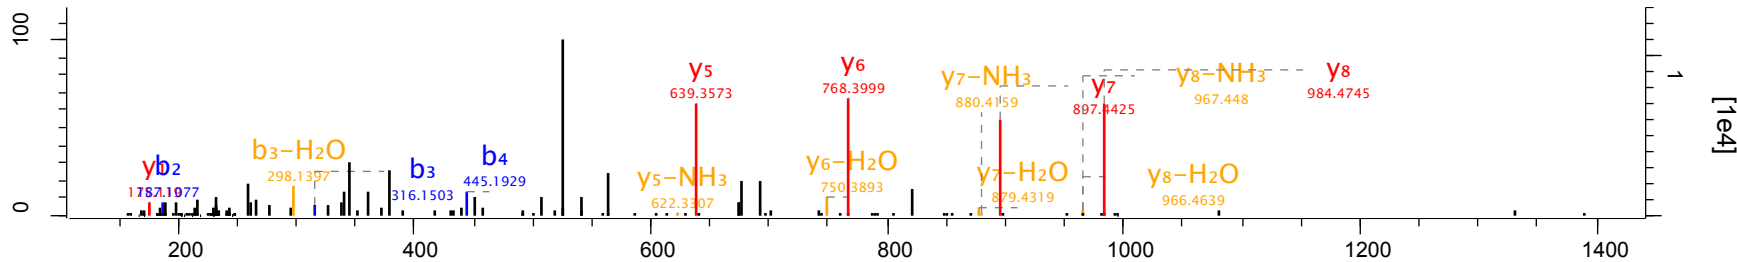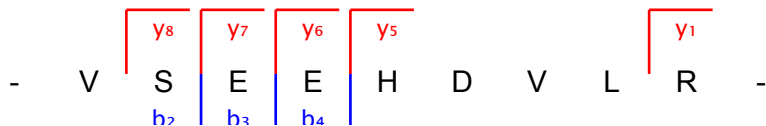

Raw file

Scan

Method

Score

m/z

20141014\_fract18\_dyn\_5ul\_G2\_01\_597

26720

TOF; CID

50.36

809.4

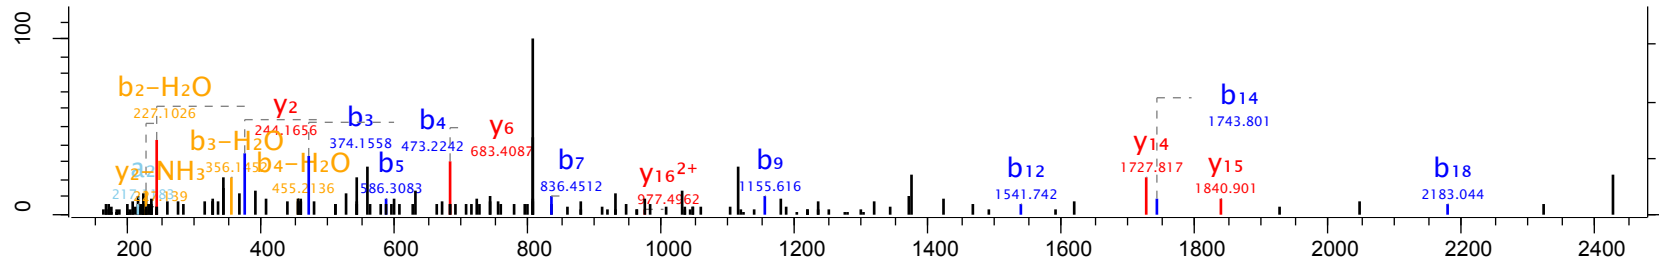

ac

- T T E V I L H Y R P C E S D P T Q L P K -

a<sub>2</sub> b<sub>3</sub> b<sub>4</sub> b<sub>5</sub> b<sub>7</sub> b<sub>9</sub> b<sub>12</sub> b<sub>14</sub> b<sub>18</sub>

y<sub>16</sub><sup>2+</sup> y<sub>15</sub> y<sub>14</sub> y<sub>6</sub> y<sub>2</sub>

Raw file

20141014\_fract18\_dyn\_5ul\_G2\_01\_597

Scan

27725

Method

TOF; CID

Score

57.94

m/z

1108.99

Gene names

TMEM51

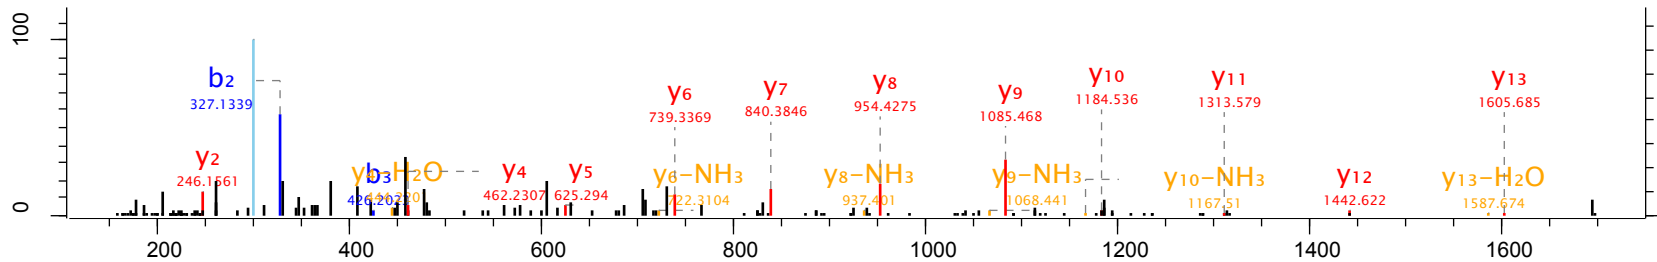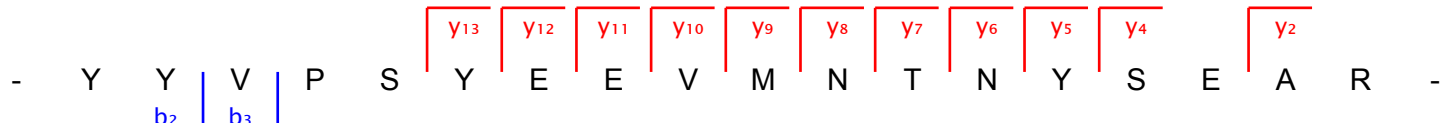

| Raw file                           | Scan  | Method   | Score | m/z    | Gene names |
|------------------------------------|-------|----------|-------|--------|------------|
| 20141014_fract18_dyn_5ul_G2_01_597 | 28110 | TOF; CID | 59.8  | 702.37 | VPS37C     |

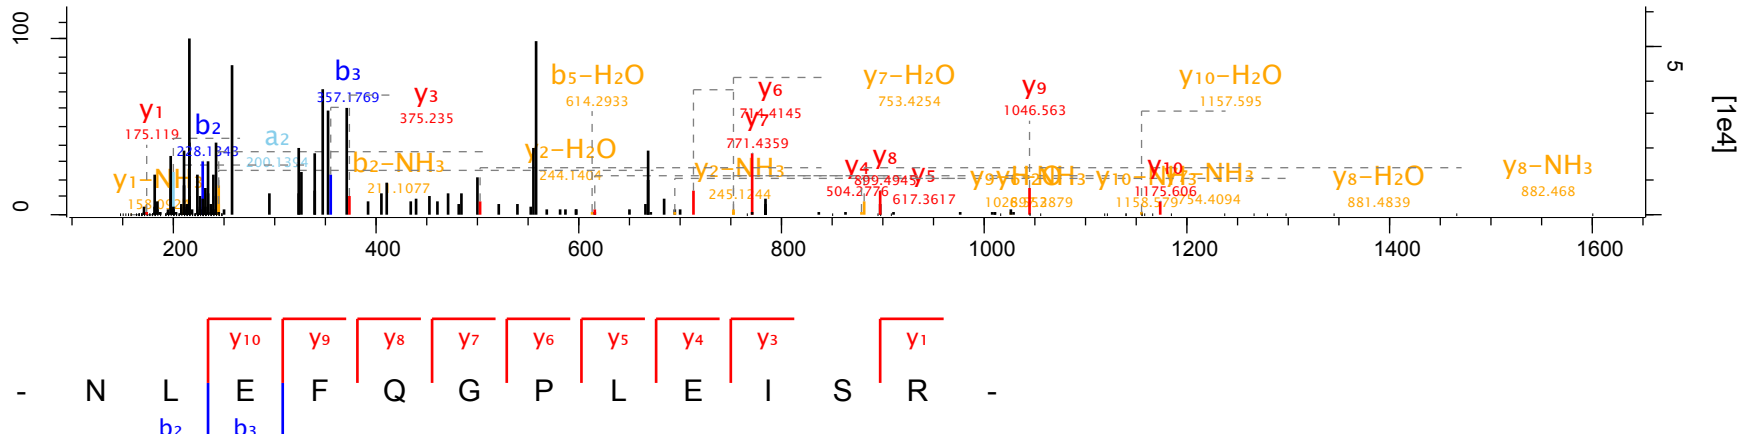



Raw file

20141014\_fract18\_dyn\_5ul\_G2\_01\_597

Scan

28746

Method

TOF; CID

Score

62.1

m/z

777.33

Gene names

TSEN15

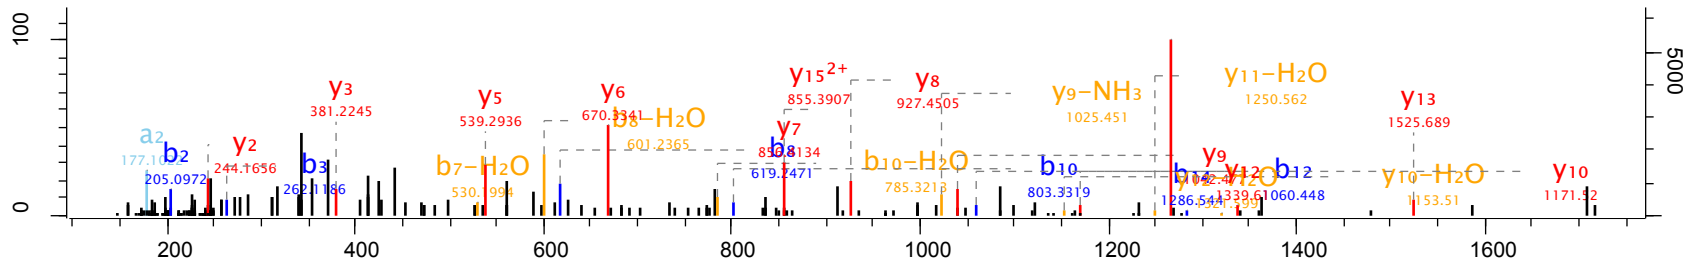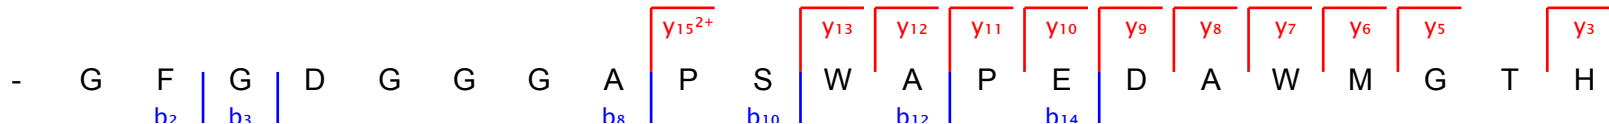

Raw file

20141014\_fract18\_dyn\_5ul\_G2\_01\_597

Scan

29037

Method

TOF; CID

Score

68.24

m/z

990.51

Gene names

UBE2W

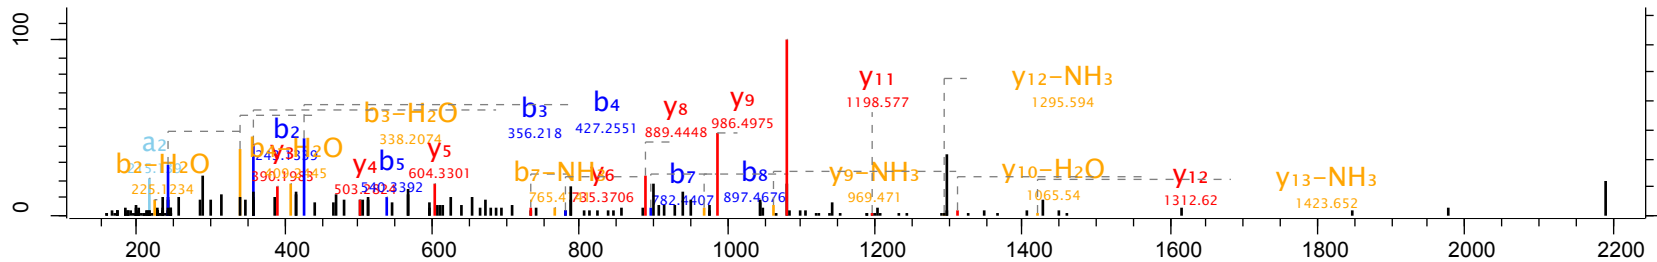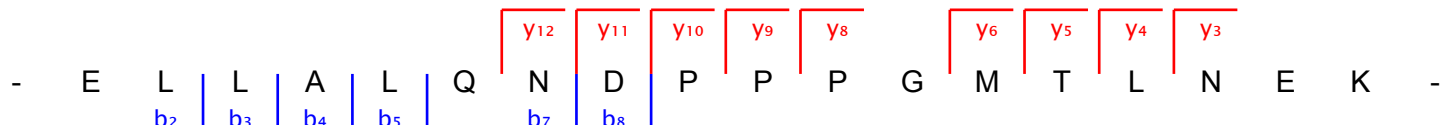



Raw file

Scan

Method

Score

m/z

Gene names

20141014\_fract18\_dyn\_5ul\_G2\_01\_597

29448

TOF; CID

82.45

899.98

BEGAIN

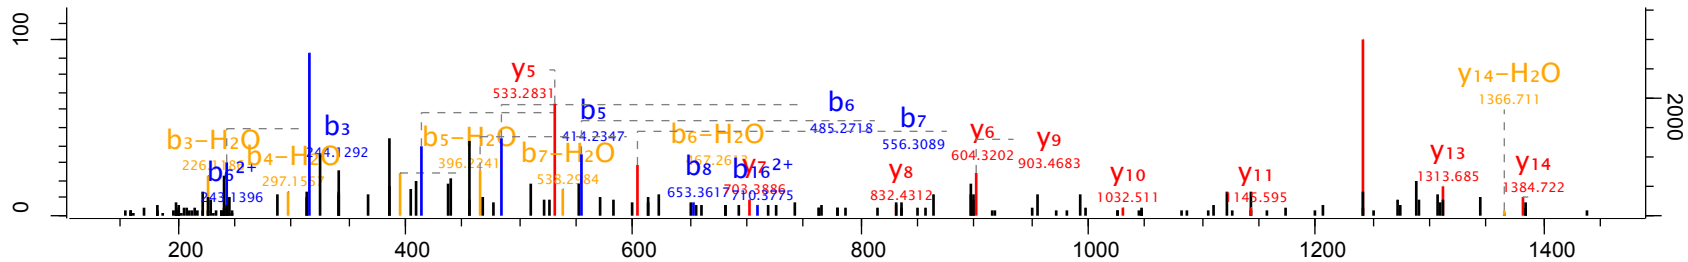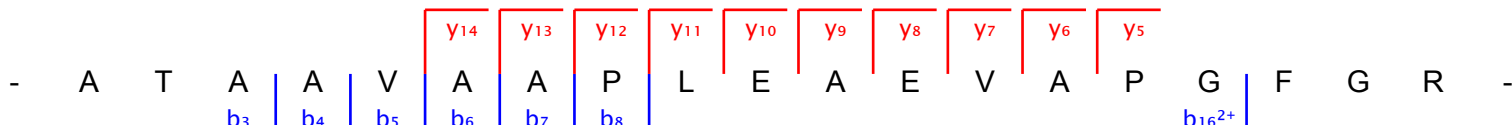

Raw file

20141014\_fract18\_dyn\_5ul\_G2\_01\_597

Scan

30228

Method

TOF; CID

Score

108.72

m/z

728.87

Gene names

MALSU1

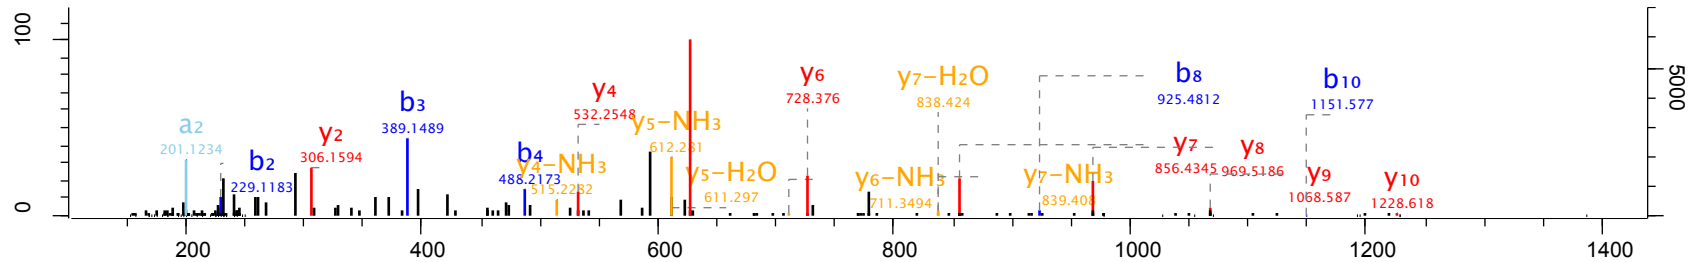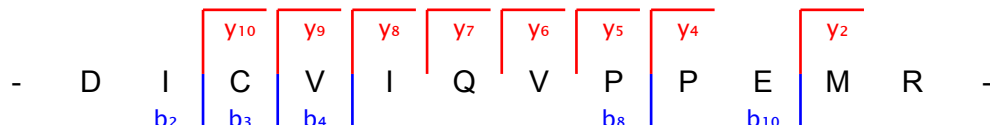

Raw file

Scan

Method

Score

m/z

Gene names

20141014\_fract18\_dyn\_5ul\_G2\_01\_597

31765

TOF; CID

47.04

805.93

PIP

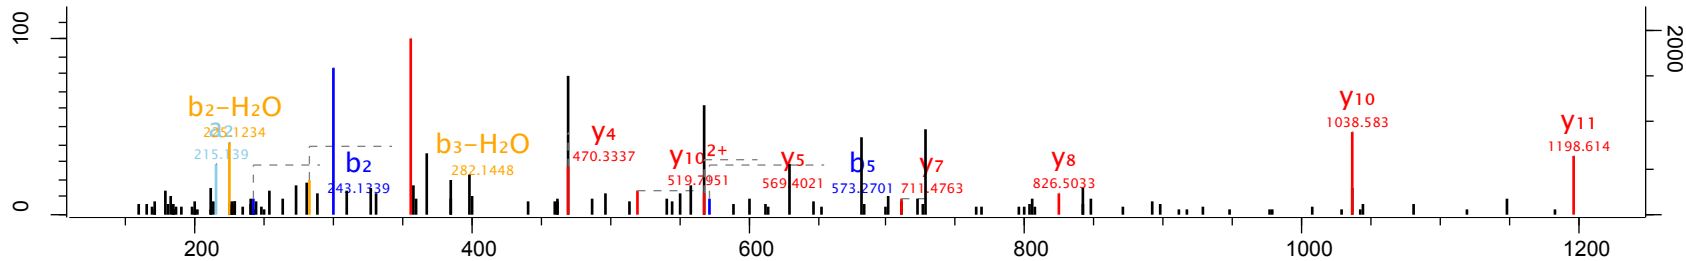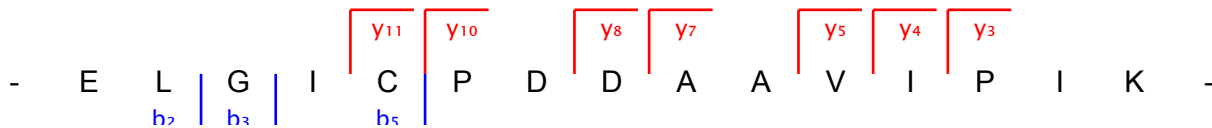

Raw file

20141014\_fract18\_dyn\_5ul\_G2\_01\_597

Scan

32329

Method

TOF; CID

Score

96.1

m/z

968

Gene names

EFHC1

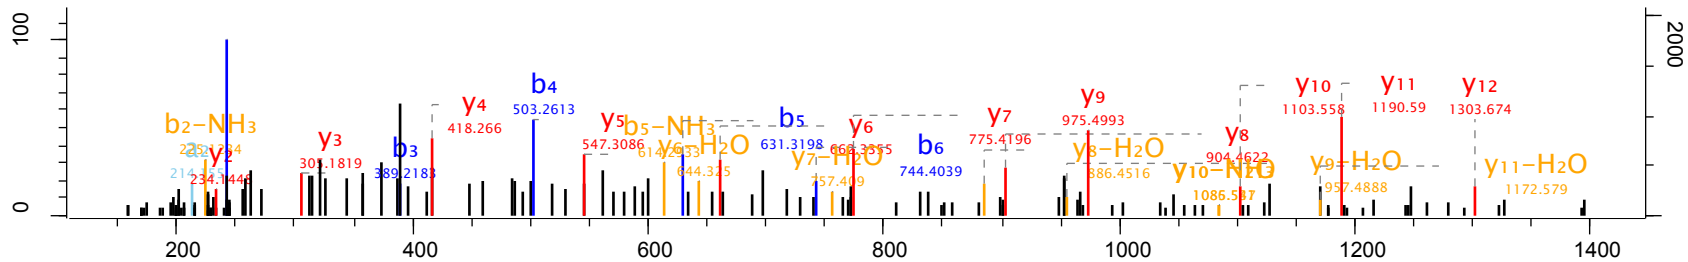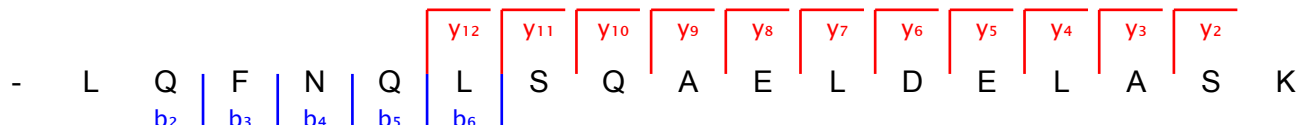

Raw file

Scan

Method

Score

m/z

Gene names

20141014\_fract18\_dyn\_5ul\_G2\_01\_597

33912

TOF; CID

78.44

948.42

TMEM222

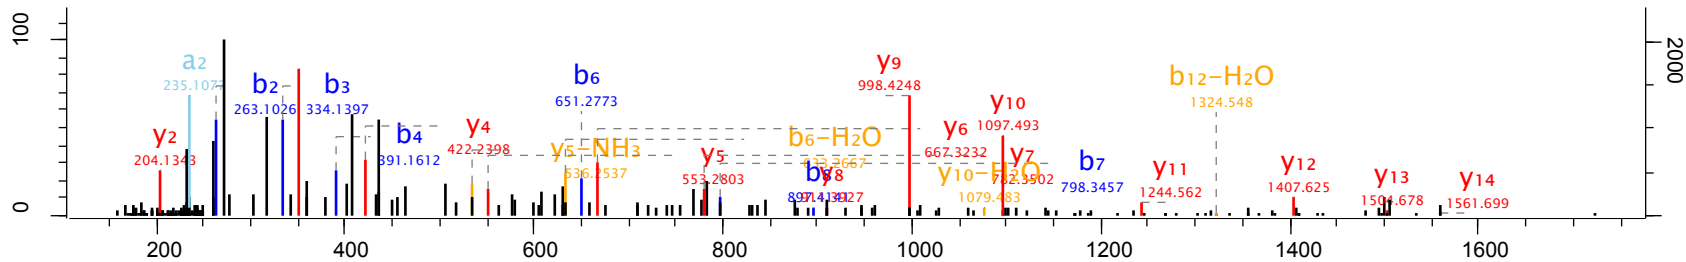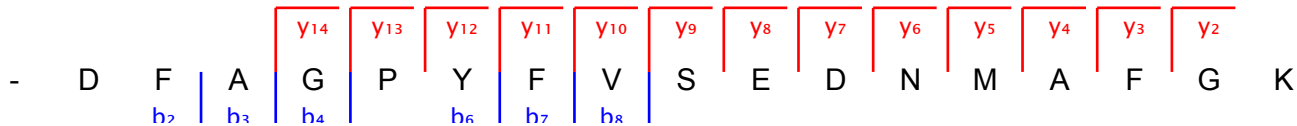



Raw file

20141014\_fract18\_dyn\_5ul\_G2\_01\_597

Scan

34439

Method

TOF; CID

Score

60.55

m/z

808.43

Gene names

NAA60

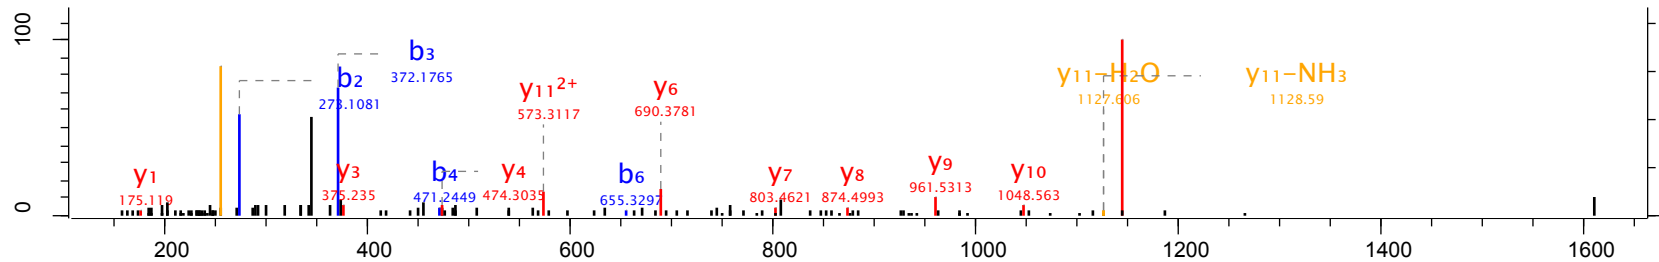

ac

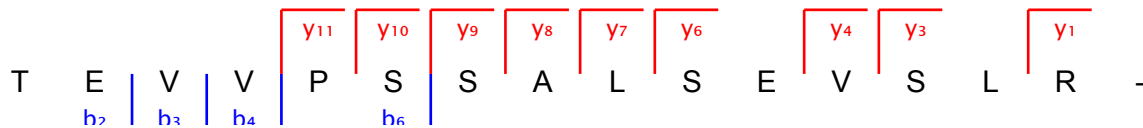

Raw file

20141014\_fract19\_dyn\_5ul\_G3\_01\_598

Scan

10366

Method

TOF; CID

Score

55.04

m/z

530.25

Gene names

MGAT5B

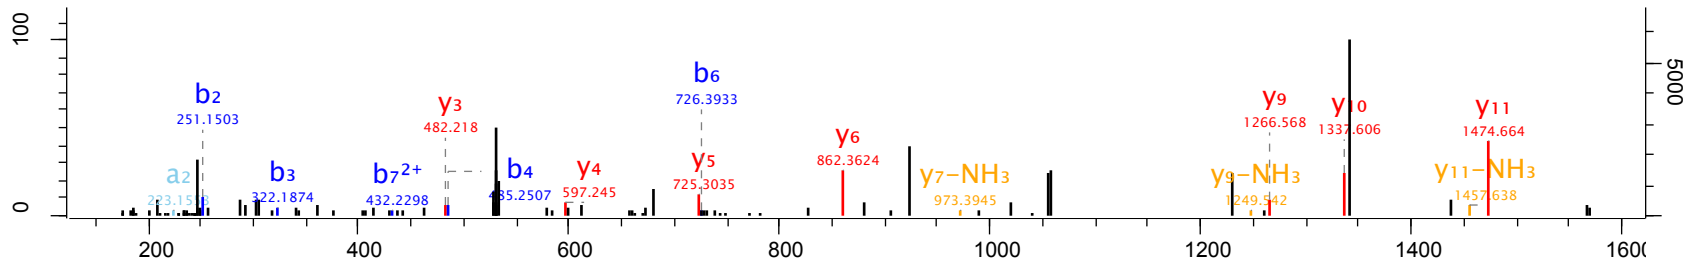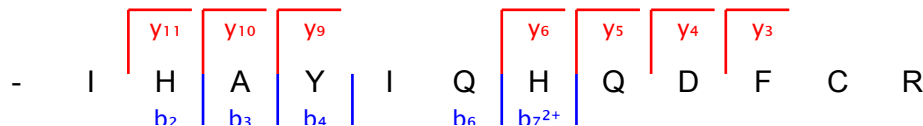

Raw file

20141014\_fract19\_dyn\_5ul\_G3\_01\_598

Scan

14294

Method

TOF; CID

Score

44.81

m/z

514.26

Gene names

TMEM53

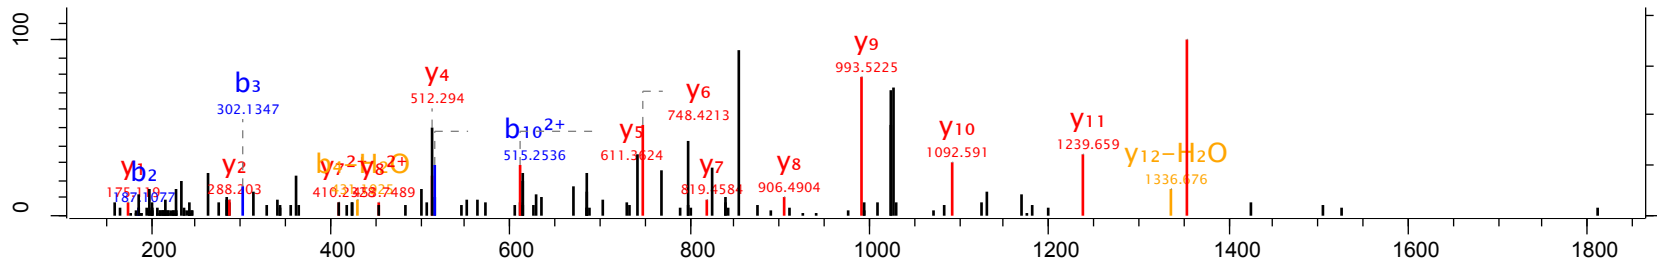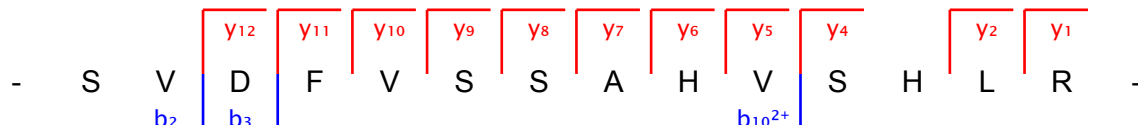

Raw file

20141014\_fract19\_dyn\_5ul\_G3\_01\_598

Scan

18406

Method

TOF; CID

Score

34.4

m/z

731.36

Gene names

ZDHHC24

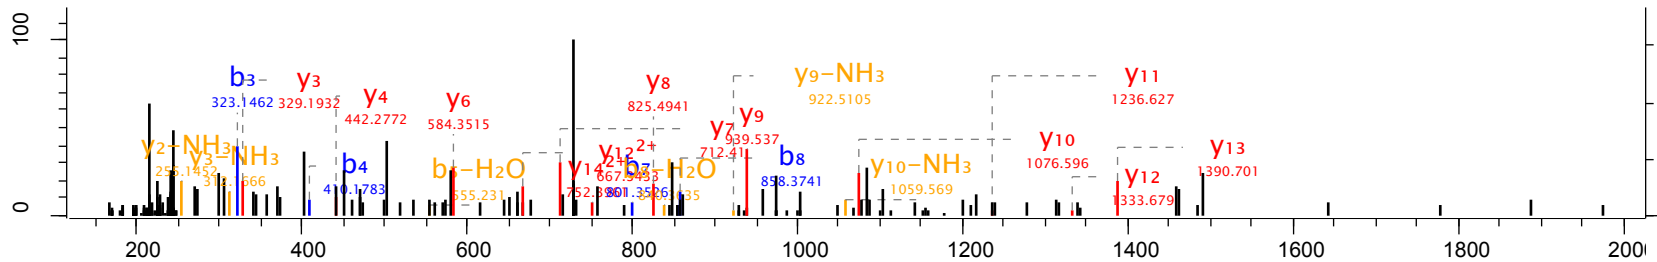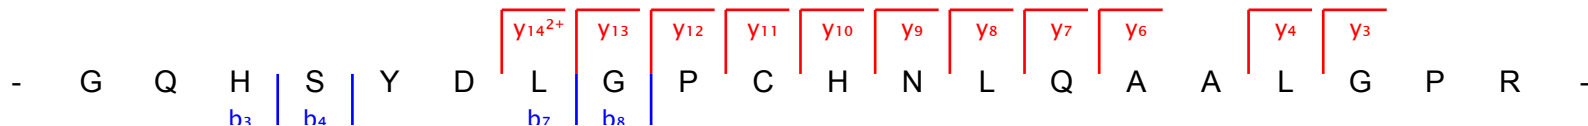

Raw file

20141014\_fract19\_dyn\_5ul\_G3\_01\_598

Scan

22302

Method

TOF; CID

Score

70.78

m/z

885.42

Gene names

DNASE1L1

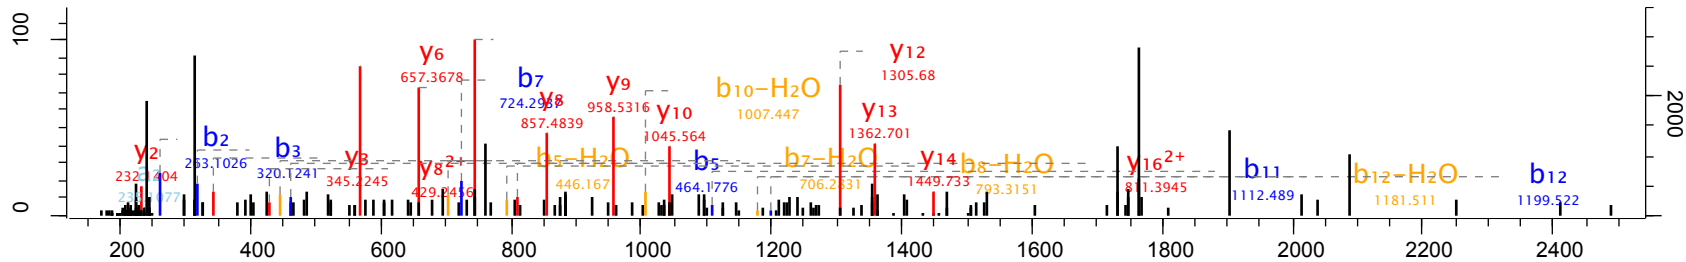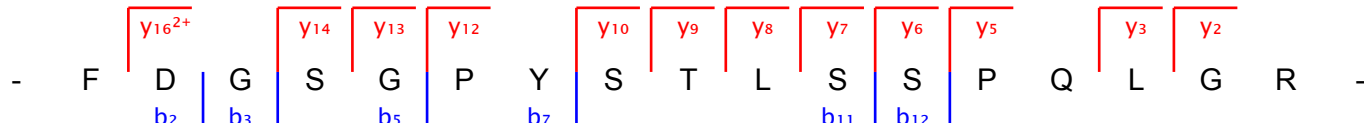

Raw file

20141014\_fract19\_dyn\_5ul\_G3\_01\_598

Scan

22540

Method

TOF; CID

Score

99.57

m/z

538.29

Gene names

S100P

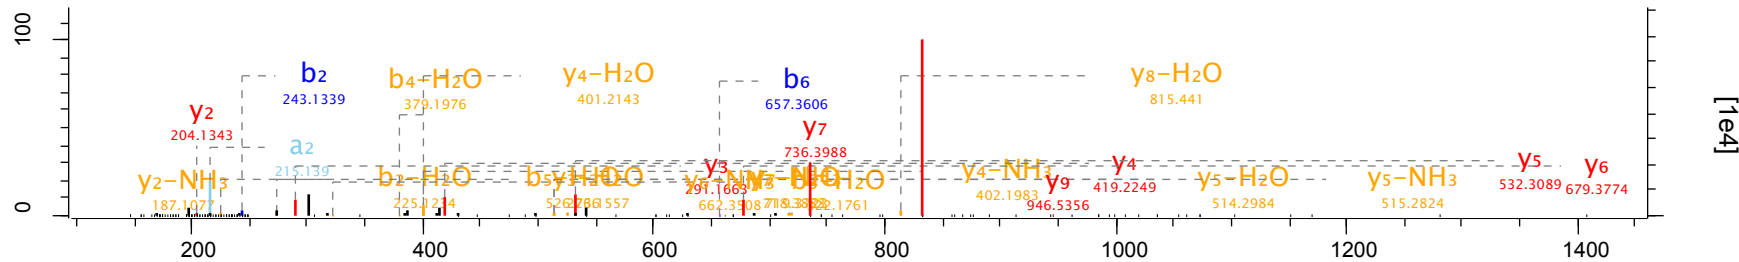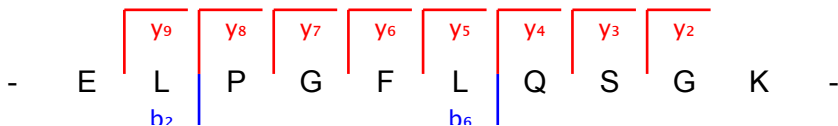

Raw file

20141014\_fract19\_dyn\_5ul\_G3\_01\_598

Scan

27711

Method

TOF; CID

Score

50.96

m/z

1143.56

Gene names

CDON

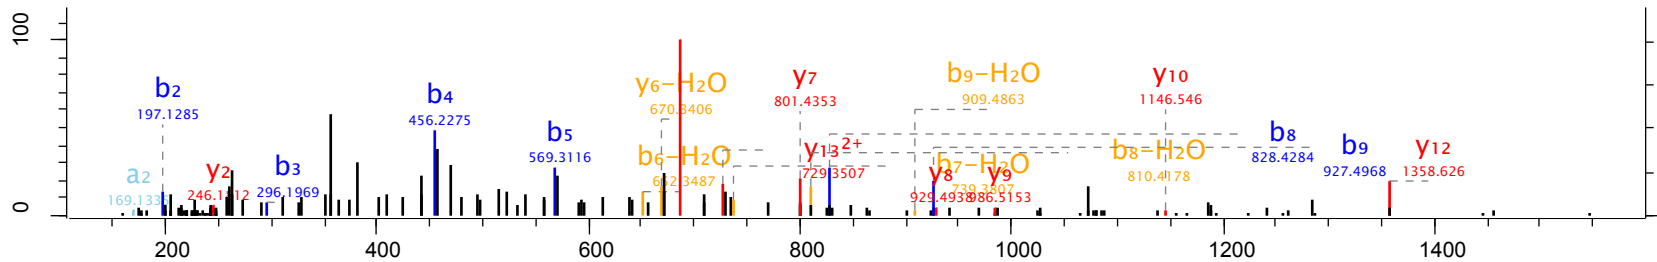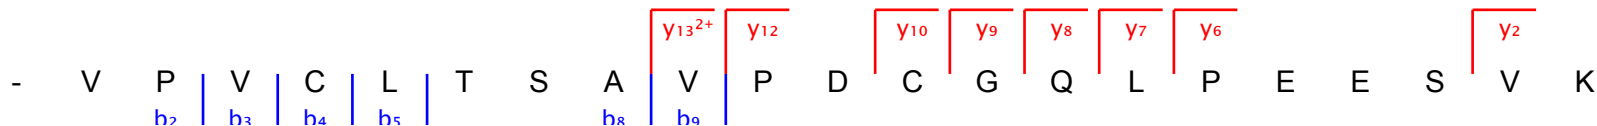

| Raw file                           | Scan  | Method   | Score | m/z    | Gene names |
|------------------------------------|-------|----------|-------|--------|------------|
| 20141014_fract19_dyn_5ul_G3_01_598 | 32776 | TOF; CID | 69.75 | 899.47 | RNF130     |

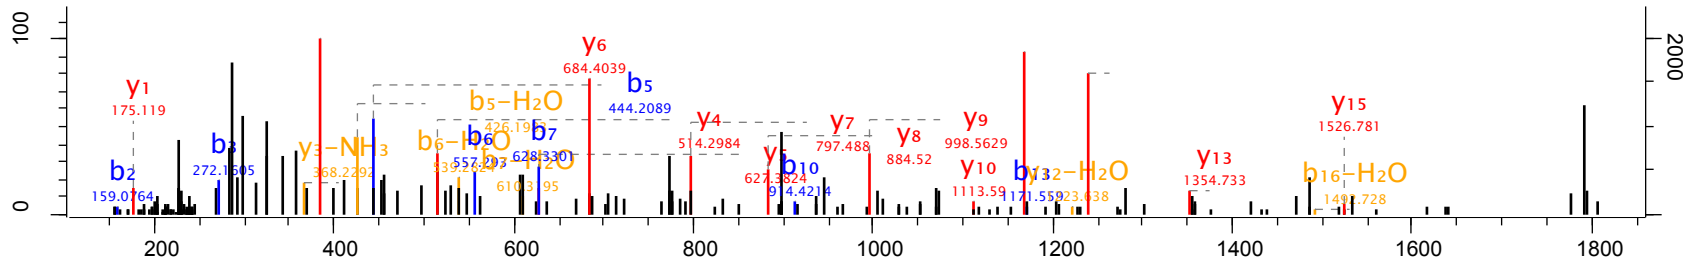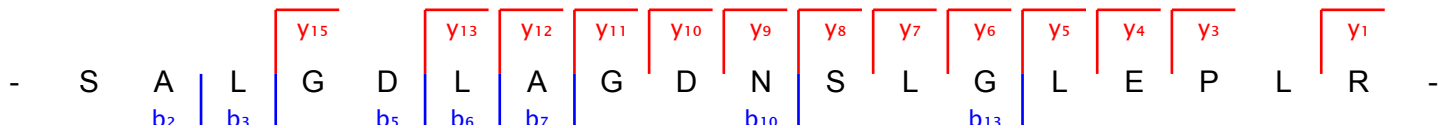



Raw file

20141014\_fract19\_dyn\_5ul\_G3\_01\_598

Scan

38338

Method

TOF; CID

Score

74.54

m/z

894.45

Gene names

CCDC70

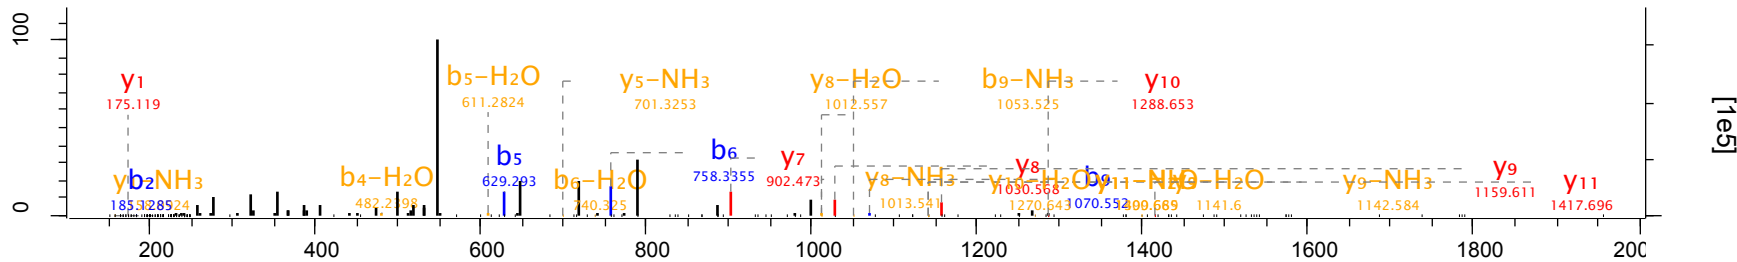

- A L W E E E K A L W V E E R -

b<sub>2</sub> | b<sub>5</sub> | b<sub>6</sub> | b<sub>9</sub>

y<sub>11</sub> | y<sub>10</sub> | y<sub>9</sub> | y<sub>8</sub> | y<sub>7</sub> | y<sub>1</sub>

Raw file

20141014\_fract20\_dyn\_5ul\_G4\_01\_599

Scan

15417

Method

TOF; CID

Score

63.62

m/z

384.57

Gene names

ARHGAP29

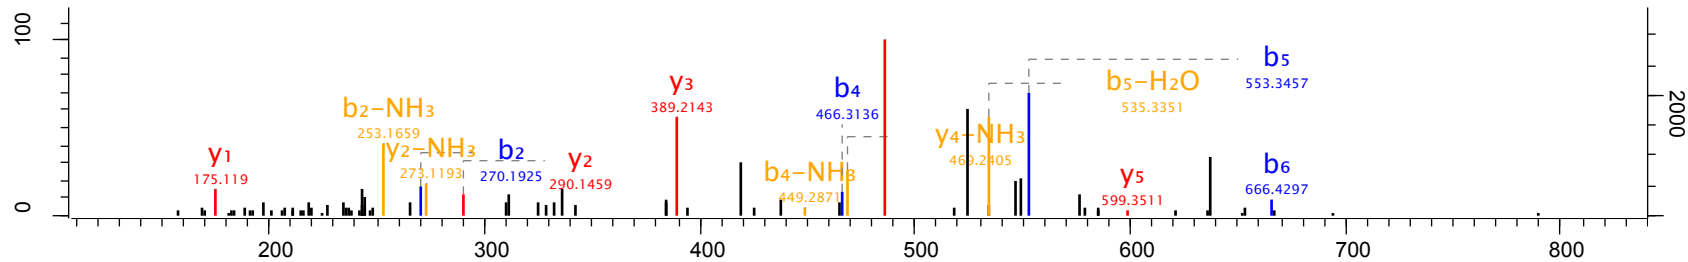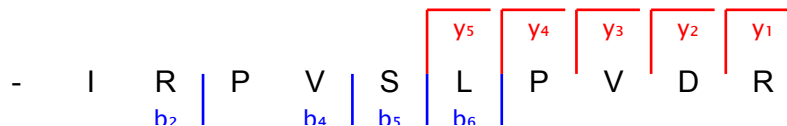

Raw file

20141014\_fract20\_dyn\_5ul\_G4\_01\_599

Scan

16215

Method

TOF; CID

Score

44.69

m/z

610.33

Gene names

SLC22A20

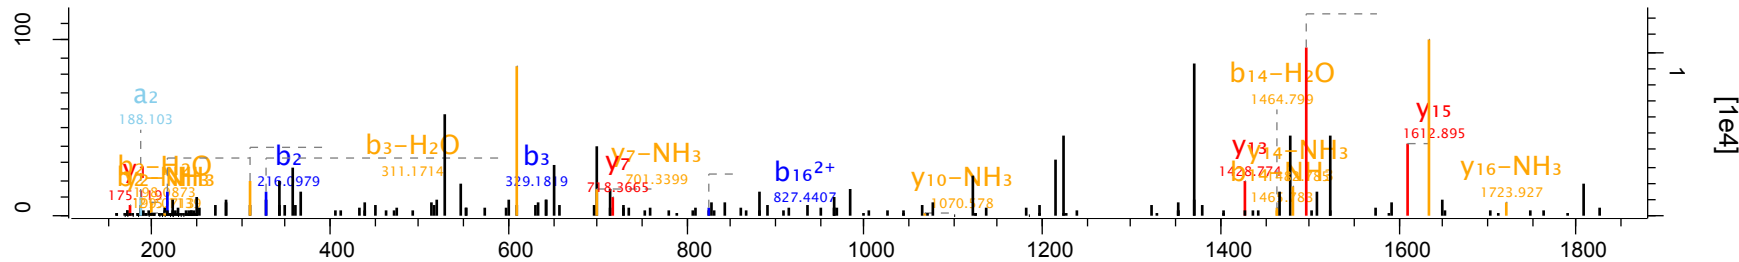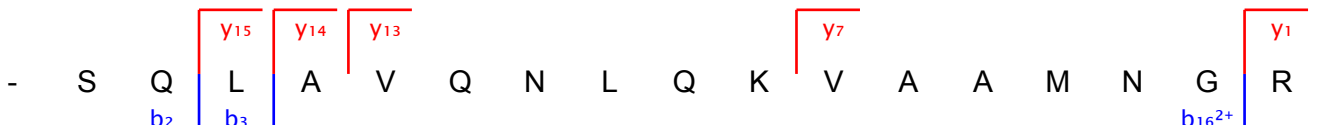

Raw file

20141014\_fract20\_dyn\_5ul\_G4\_01\_599

Scan

24655

Method

TOF; CID

Score

52.07

m/z

682.35

Gene names

ENTPD6

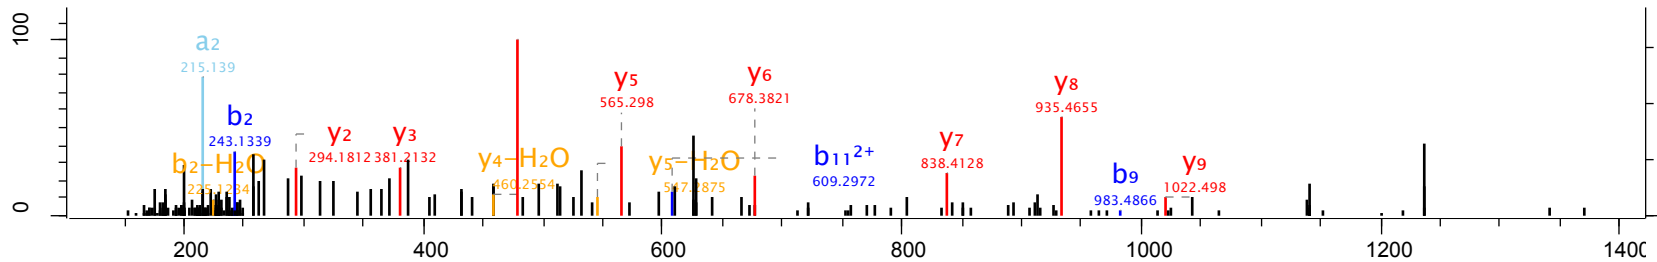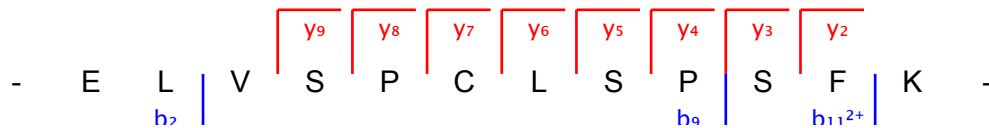

Raw file

Scan

Method

Score

m/z

Gene names

20141014\_fract20\_dyn\_5ul\_G4\_01\_599

28236

TOF; CID

98.94

731.88

SNAPC5

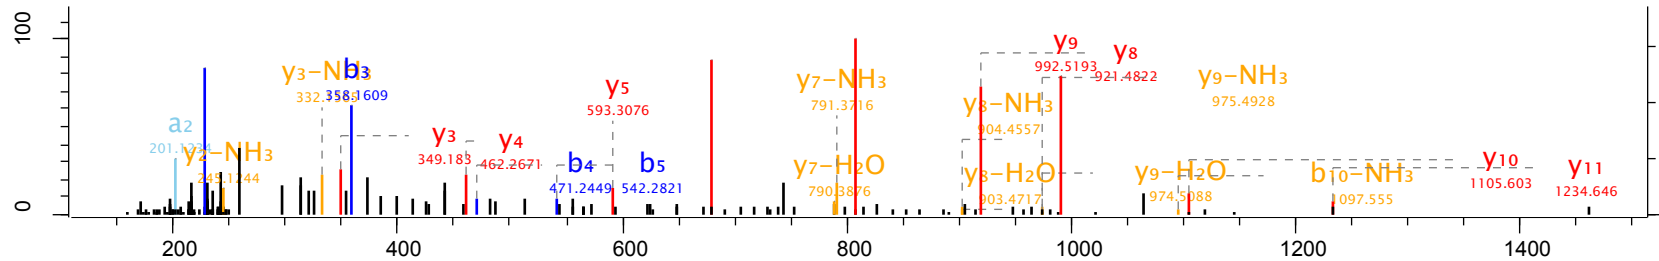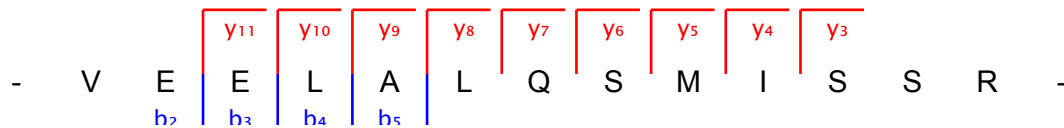

Raw file

20141014\_fract20\_dyn\_5ul\_G4\_01\_599

Scan

28849

Method

TOF; CID

Score

80.54

m/z

980.47

Gene names

FAM168A

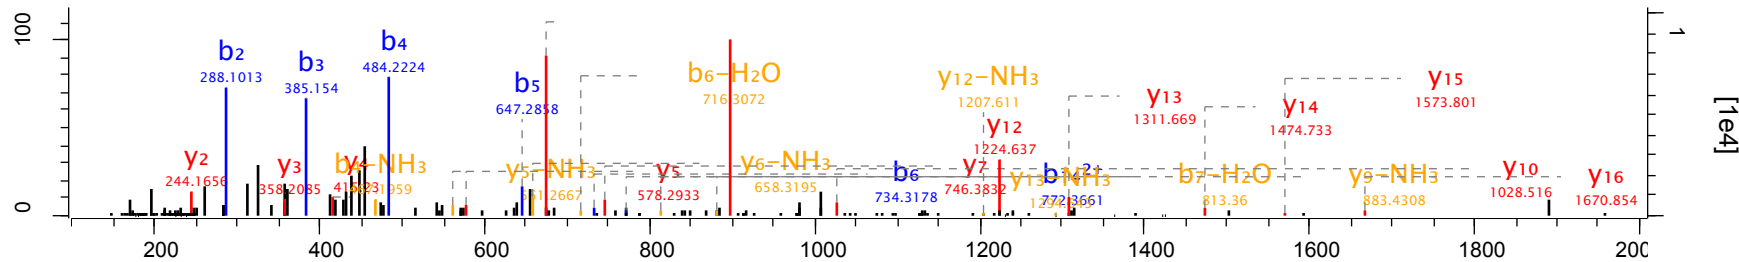

ac

- M N P V Y S P V Q P G A P Y G N P K -  
 b<sub>2</sub> b<sub>3</sub> b<sub>4</sub> b<sub>5</sub> b<sub>6</sub> b<sub>14</sub><sup>2+</sup> y<sub>16</sub> y<sub>15</sub> y<sub>14</sub> y<sub>13</sub> y<sub>12</sub> y<sub>10</sub> y<sub>9</sub> y<sub>7</sub> y<sub>6</sub> y<sub>5</sub> y<sub>4</sub> y<sub>3</sub> y<sub>2</sub>

Raw file

20141014\_fract20\_dyn\_5ul\_G4\_01\_599

Scan

29642

Method

TOF; CID

Score

93.18

m/z

609.33

Gene names

GOLGA8A;GOLGA8B

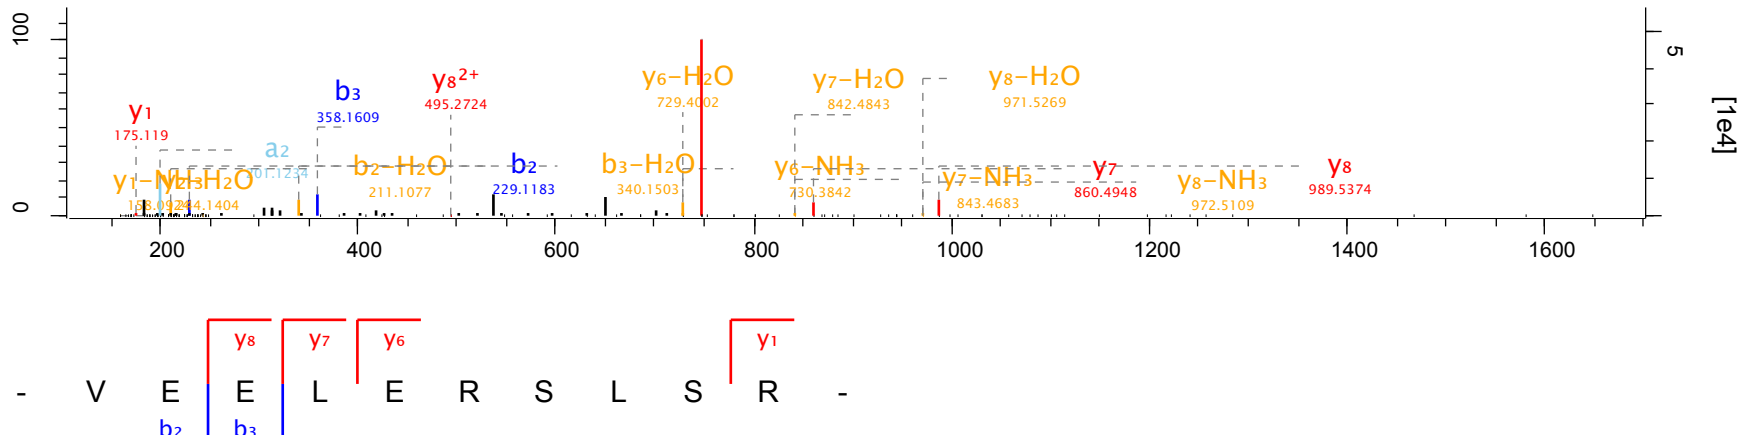

Raw file

20141014\_fract20\_dyn\_5ul\_G4\_01\_599

Scan

31462

Method

TOF; CID

Score

100.43

m/z

840.44

Gene names

COMMD7

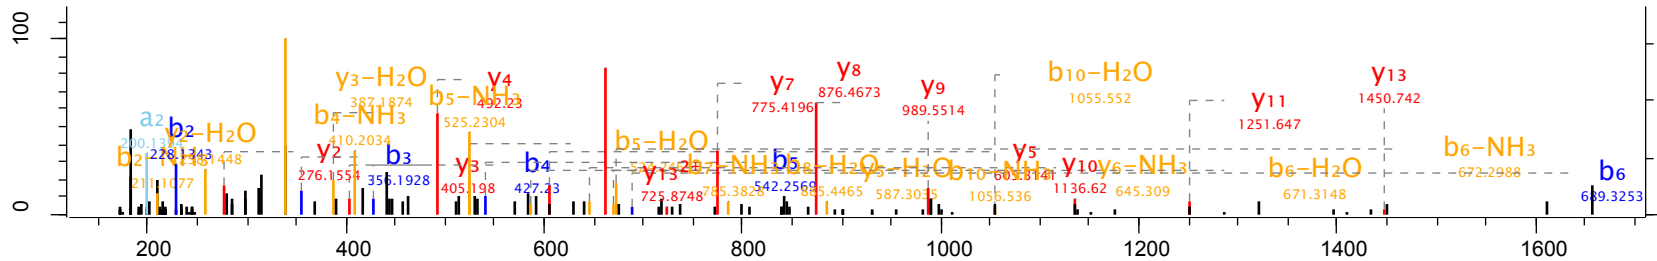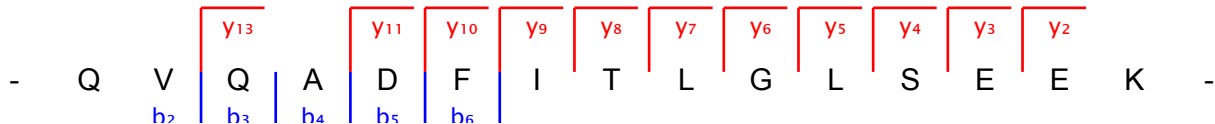



Raw file

20141014\_fract20\_dyn\_5ul\_G4\_01\_599

Scan

33602

Method

TOF; CID

Score

36.08

m/z

881.42

Gene names

SAYSD1

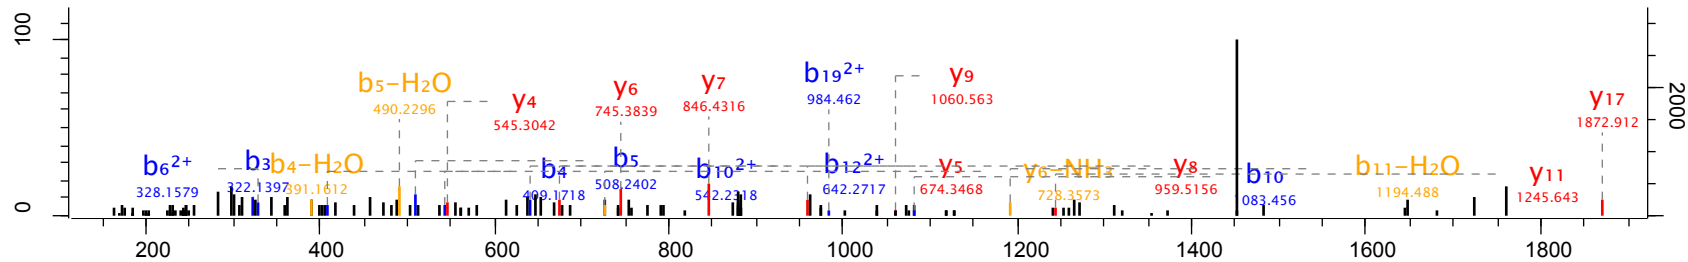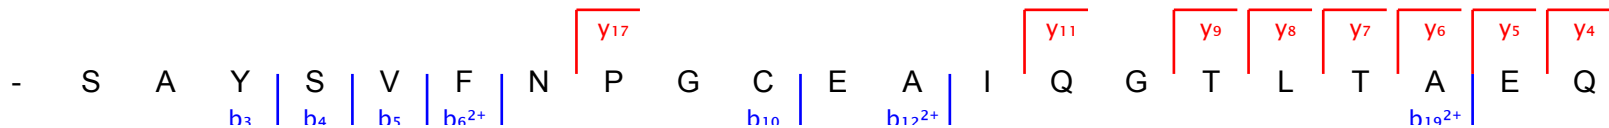

Raw file

20141014\_fract21\_dyn\_5ul\_G5\_01\_600

Scan

6457

Method

TOF; CID

Score

138.37

m/z

433.76

Gene names

SLC39A1

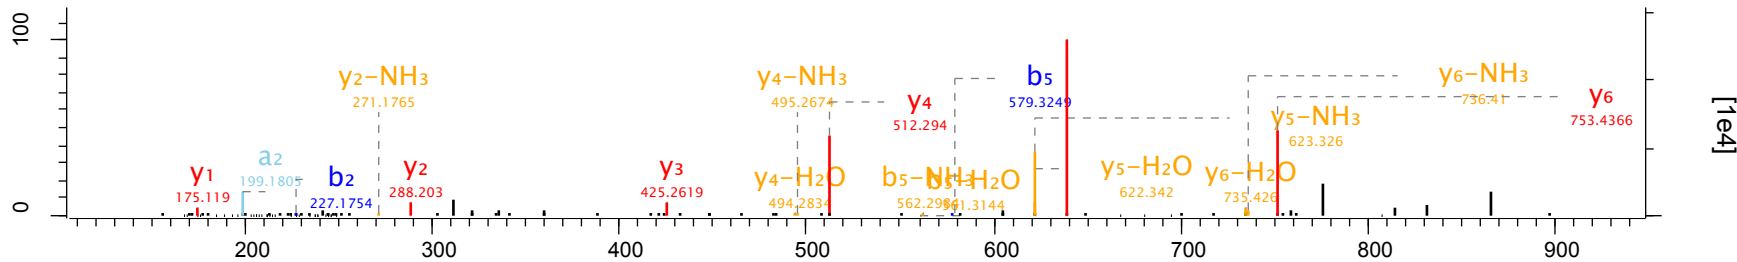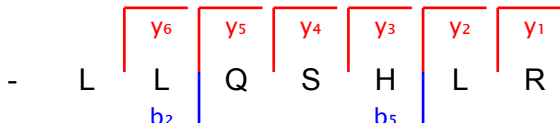

| Raw file                           | Scan  | Method   | Score | m/z    | Gene names |
|------------------------------------|-------|----------|-------|--------|------------|
| 20141014_fract21_dyn_5ul_G5_01_600 | 13464 | TOF; CID | 91.66 | 578.84 | KIAA1107   |

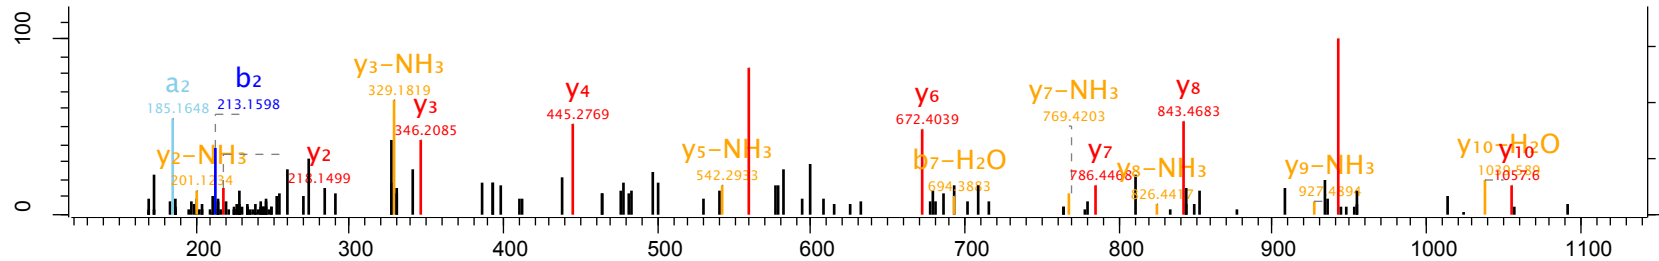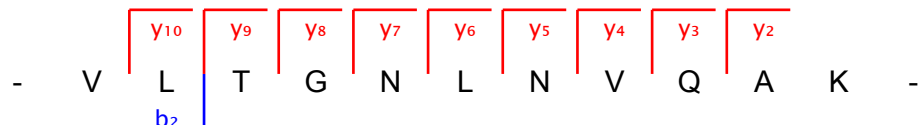

| Raw file                           | Scan  | Method   | Score | m/z    | Gene names |
|------------------------------------|-------|----------|-------|--------|------------|
| 20141014_fract21_dyn_5ul_G5_01_600 | 15422 | TOF; CID | 50.9  | 606.83 | AGBL5      |

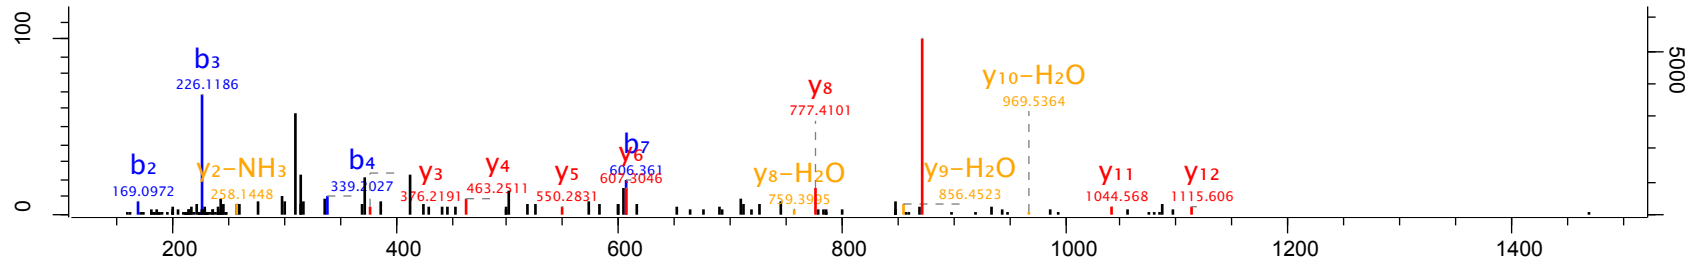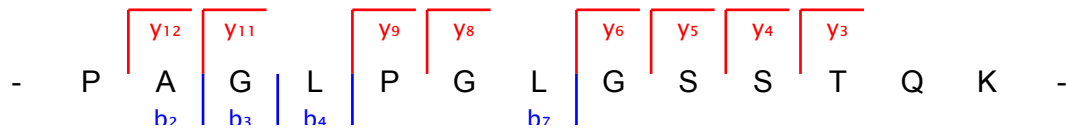

Raw file

Scan

Method

Score

m/z

Gene names

20141014\_fract21\_dyn\_5ul\_G5\_01\_600

15509

TOF; CID

90.15

525.79

ABLIM2

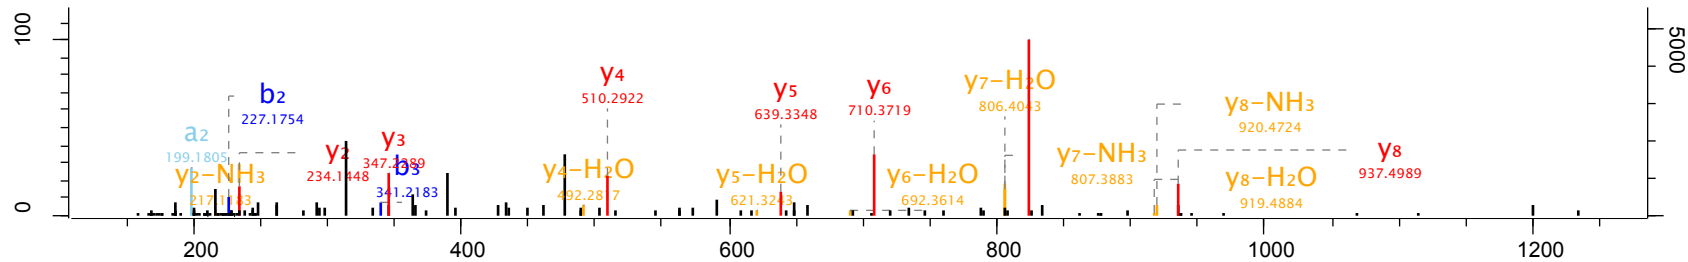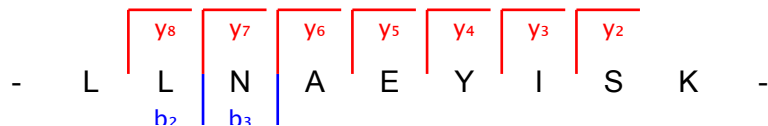

| Raw file                           | Scan  | Method   | Score | m/z    | Gene names |
|------------------------------------|-------|----------|-------|--------|------------|
| 20141014_fract21_dyn_5ul_G5_01_600 | 16497 | TOF; CID | 76.22 | 377.23 | NIPA2      |

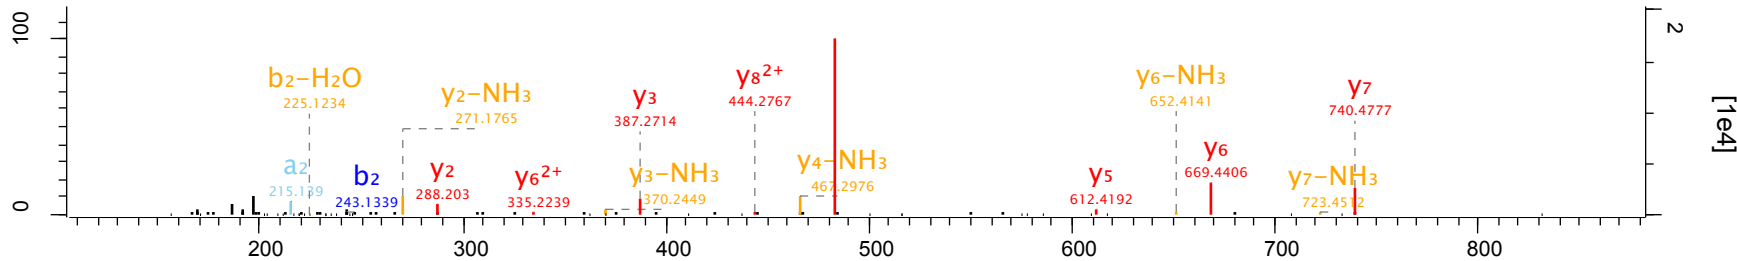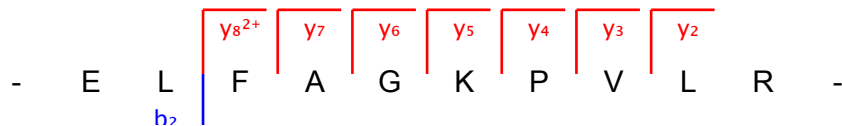

Raw file

20141014\_fract21\_dyn\_5ul\_G5\_01\_600

Scan

17422

Method

TOF; CID

Score

121.9

m/z

664.33

Gene names

ZNF706

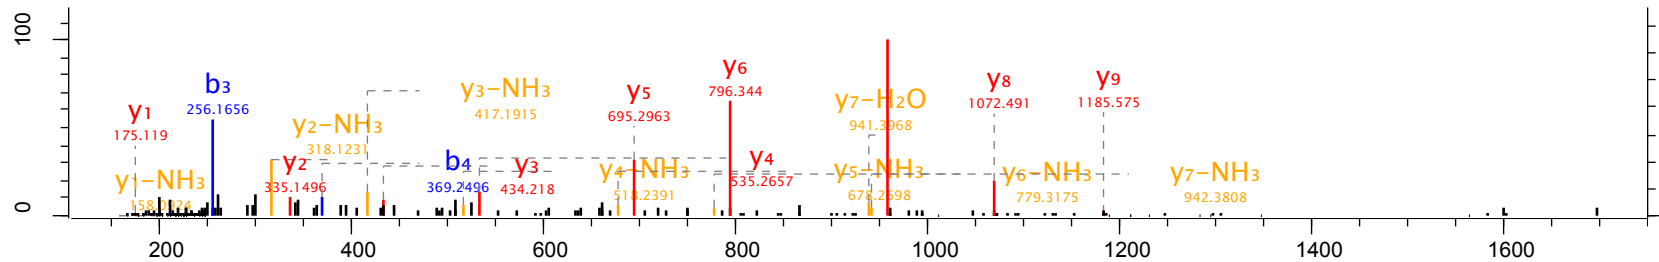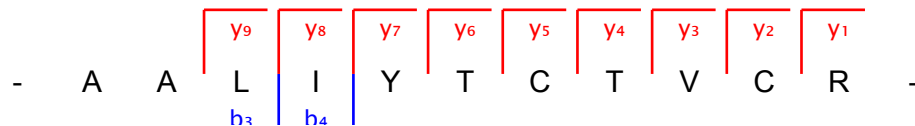

Raw file

Scan

Method

Score

m/z

Gene names

20141014\_fract21\_dyn\_5ul\_G5\_01\_600

19806

TOF; CID

50.18

461.74

ZBTB45

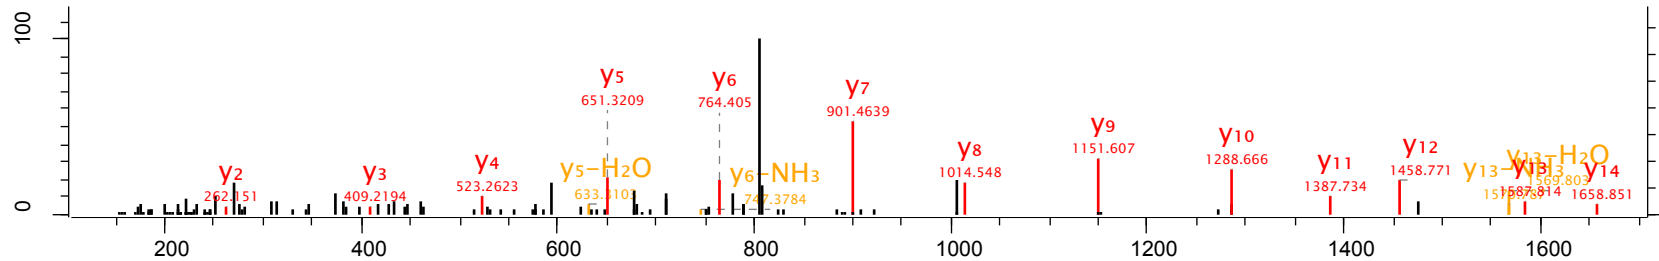

ac

-

A

A

A

E

A

V

H

H

I

H

L

Q

N

F

S

R

-

y14

y13

y12

y11

y10

y9

y8

y7

y6

y5

y4

y3

y2



Raw file

20141014\_fract21\_dyn\_5ul\_G5\_01\_600

Scan

22193

Method

TOF; CID

Score

78.4

m/z

636.86

Gene names

TMEM219

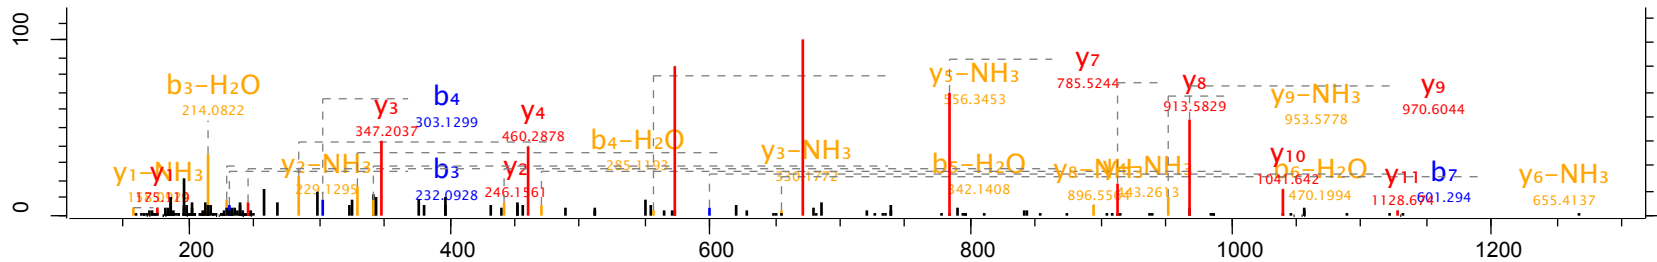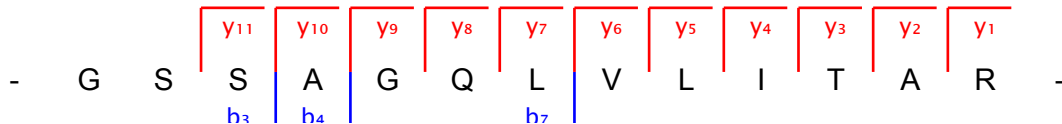

Raw file

20141014\_fract21\_dyn\_5ul\_G5\_01\_600

Scan

22235

Method

TOF; CID

Score

36.92

m/z

998.51

Gene names

LMO4

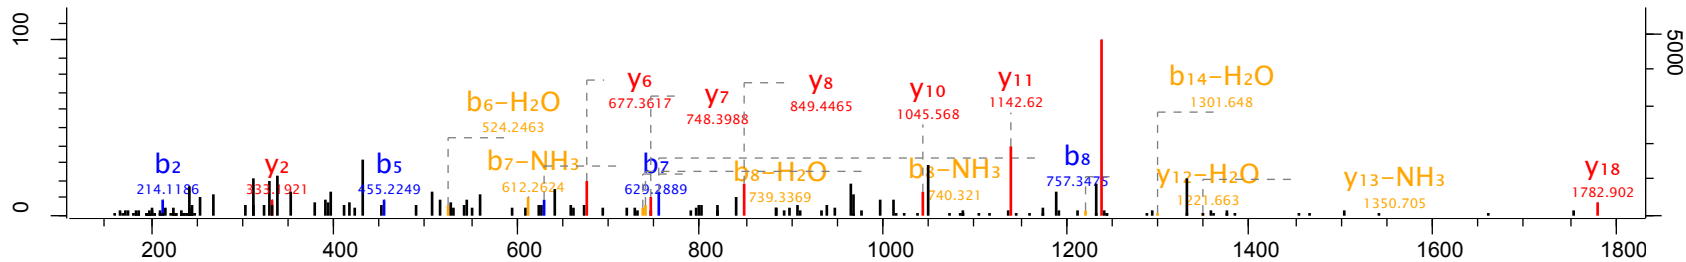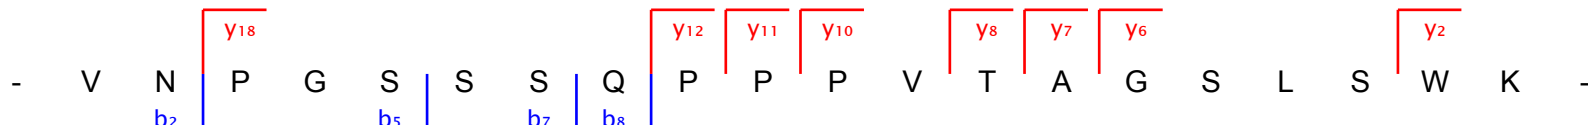

| Raw file                           | Scan  | Method   | Score | m/z    | Gene names |
|------------------------------------|-------|----------|-------|--------|------------|
| 20141014_fract21_dyn_5ul_G5_01_600 | 28402 | TOF; CID | 63.68 | 585.64 | TWSG1      |

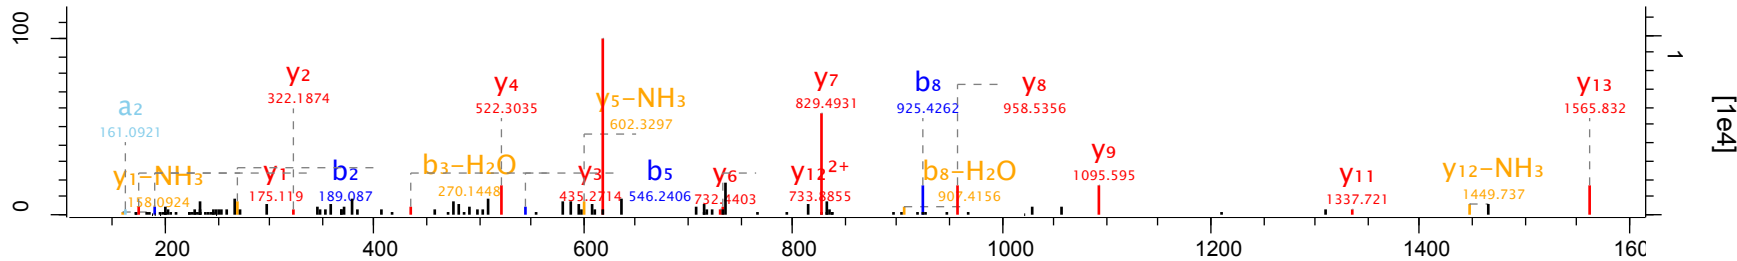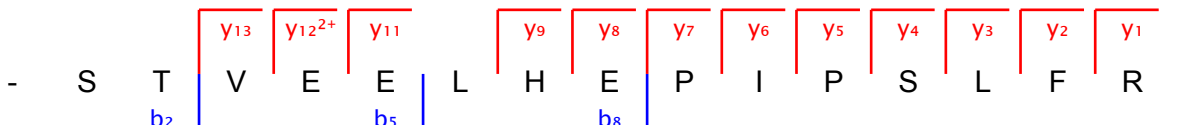

Raw file

20141014\_fract22\_dyn\_5ul\_G6\_01\_601

Scan

8661

Method

TOF; CID

Score

63.06

m/z

457.74

Gene names

ZNF780A

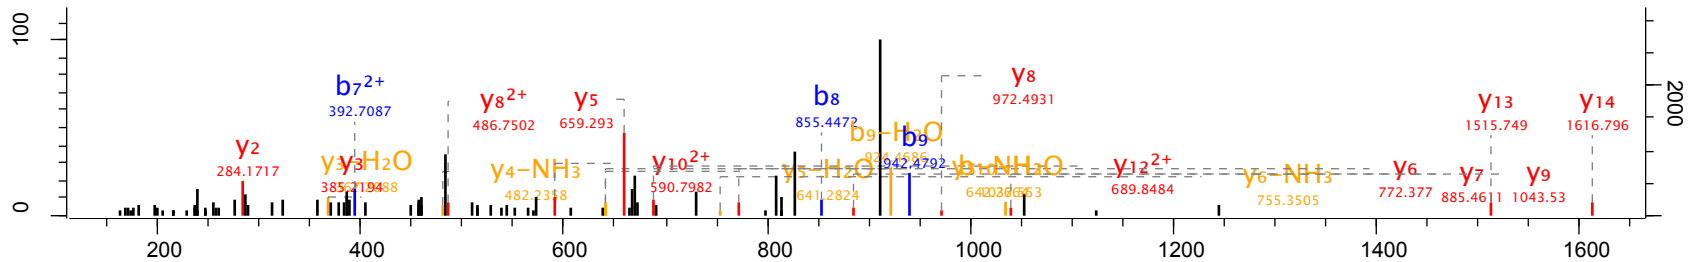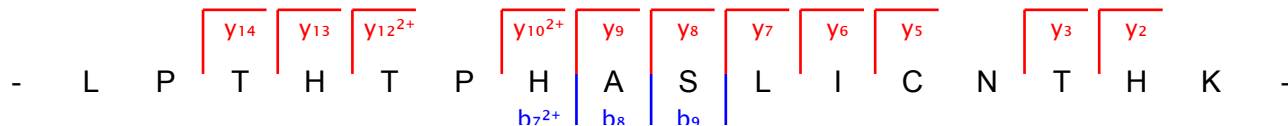

| Raw file                           | Scan  | Method   | Score | m/z    | Gene names |
|------------------------------------|-------|----------|-------|--------|------------|
| 20141014_fract22_dyn_5ul_G6_01_601 | 14883 | TOF; CID | 42.32 | 515.28 | SLC23A2    |

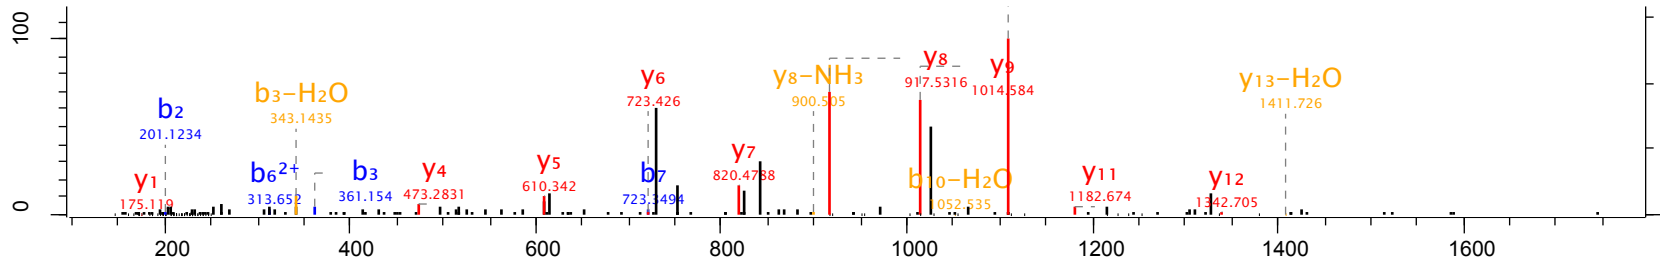

[1e4]

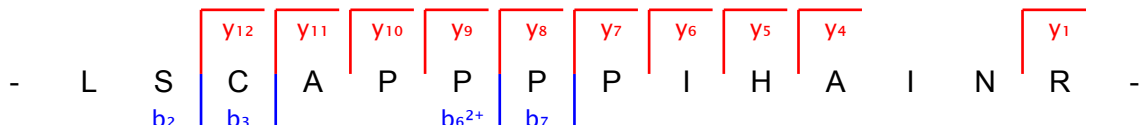

| Raw file                           | Scan  | Method   | Score  | m/z    | Gene names |
|------------------------------------|-------|----------|--------|--------|------------|
| 20141014_fract22_dyn_5ul_G6_01_601 | 16056 | TOF; CID | 114.72 | 721.39 | AKAP7      |

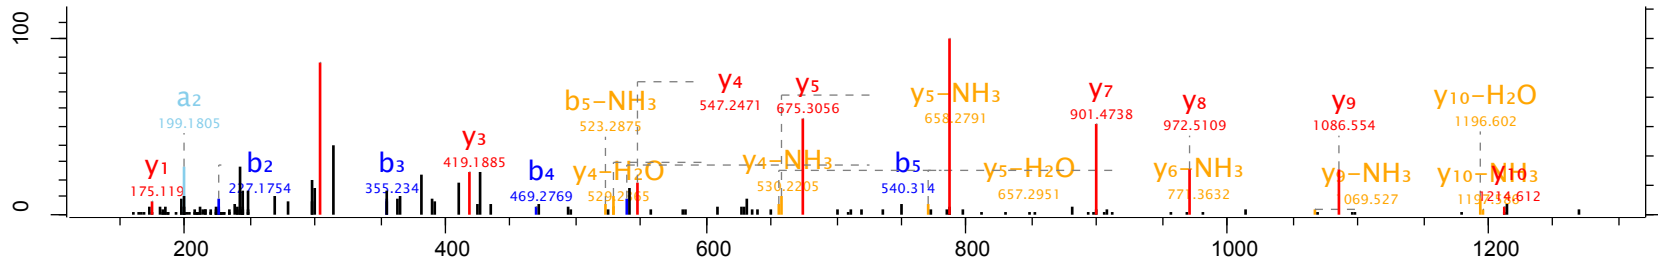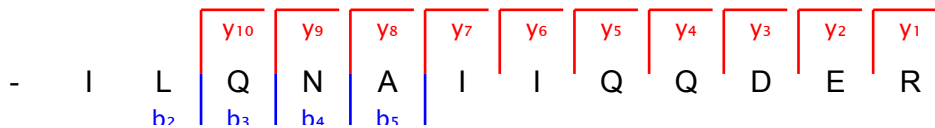

Raw file

Scan

Method

Score

m/z

Gene names

20141014\_fract22\_dyn\_5ul\_G6\_01\_601

19737

TOF; CID

105.03

826.89

FBXW2

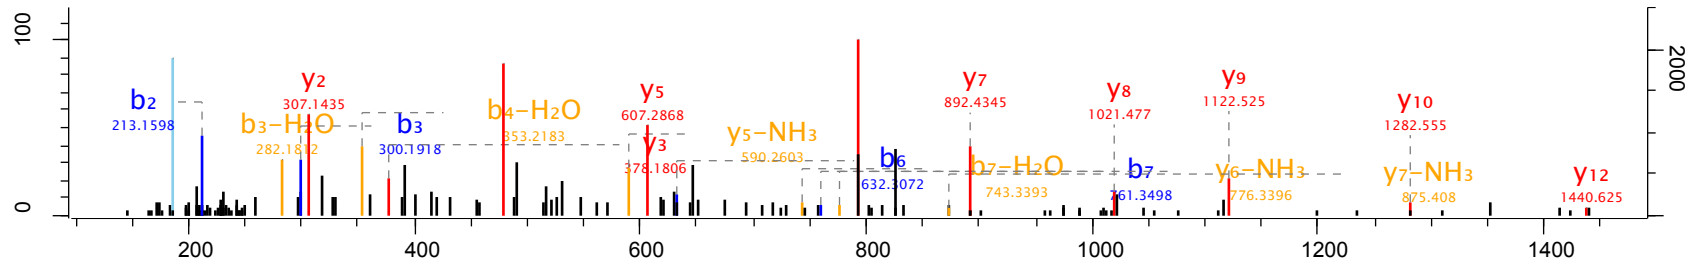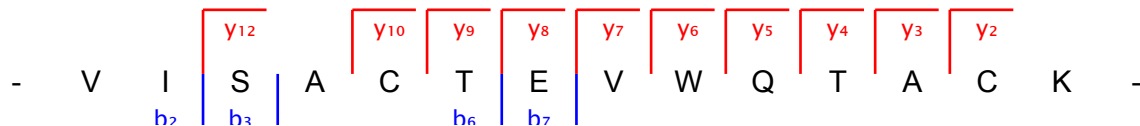

Raw file

20141014\_fract22\_dyn\_5ul\_G6\_01\_601

Scan

22553

Method

TOF; CID

Score

105.9

m/z

734.65

Gene names

ELOF1

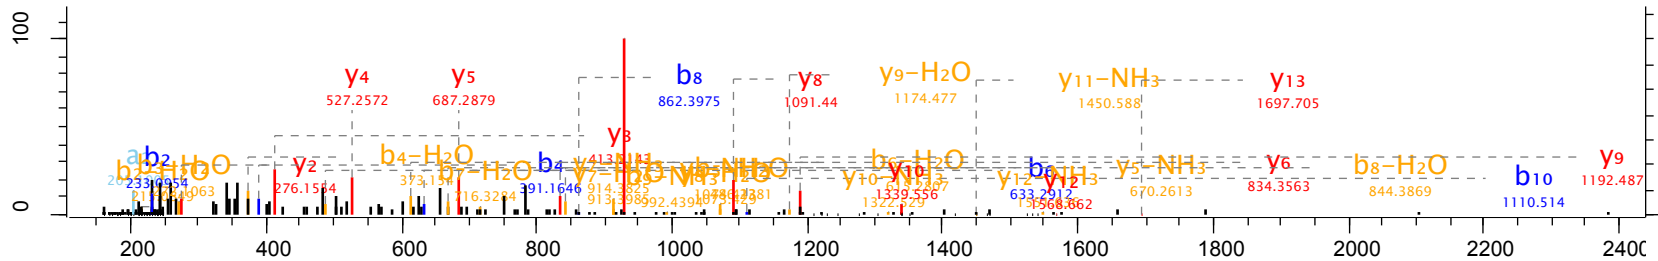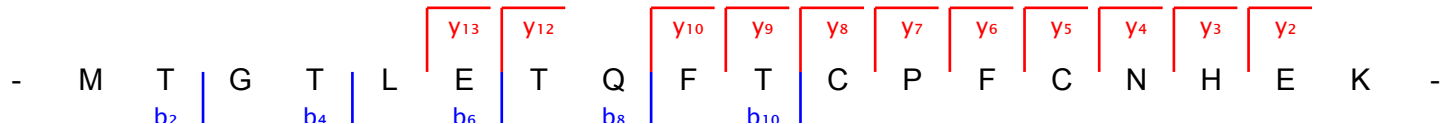



| Raw file                           | Scan  | Method   | Score  | m/z    | Gene names |
|------------------------------------|-------|----------|--------|--------|------------|
| 20141014_fract22_dyn_5ul_G6_01_601 | 24438 | TOF; CID | 103.55 | 519.82 | OPN3       |

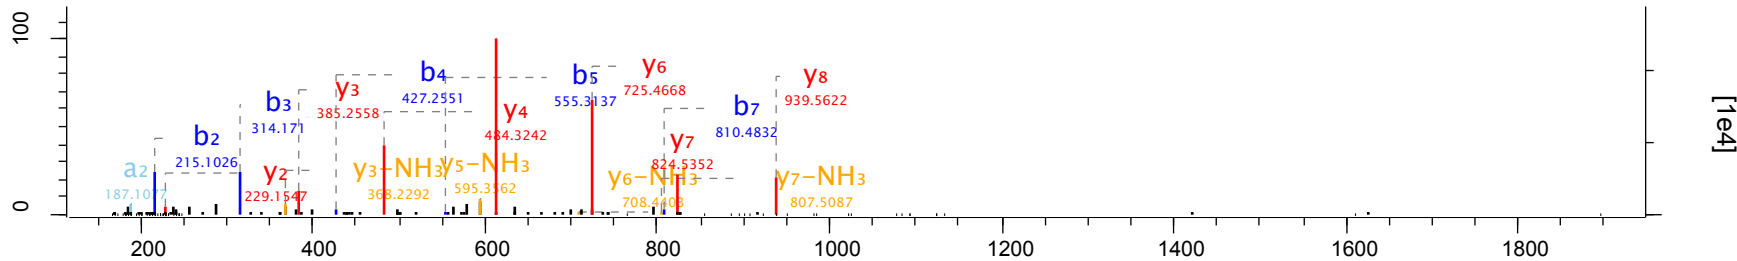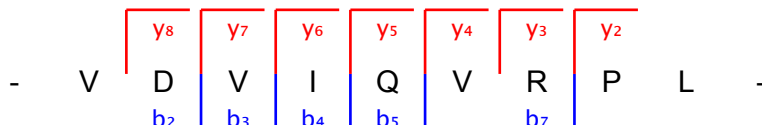

Raw file

20141014\_fract22\_dyn\_5ul\_G6\_01\_601

Scan

32899

Method

TOF; CID

Score

68.26

m/z

813.89

Gene names

TSPAN1

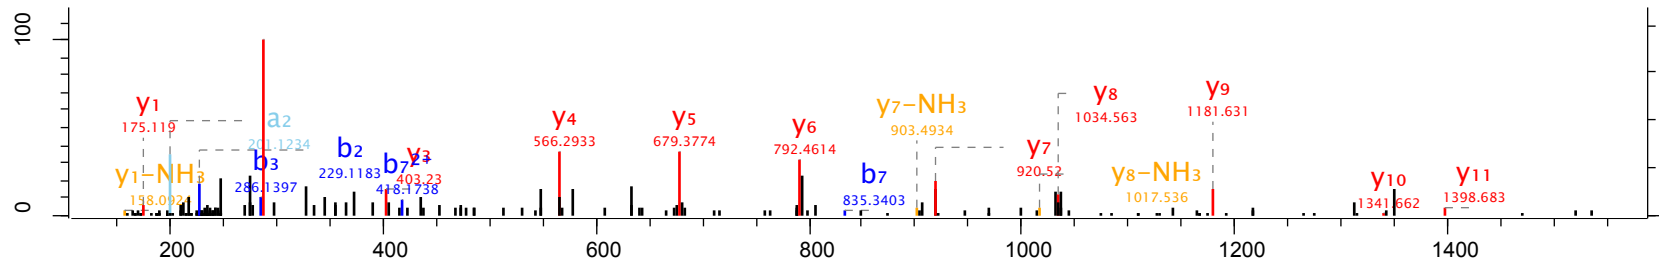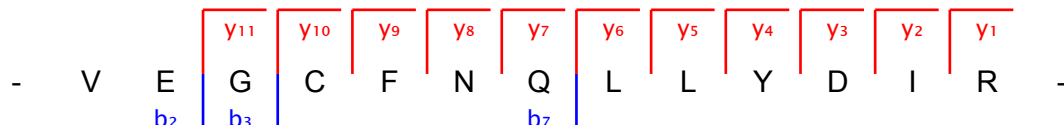

Raw file

Scan

Method

Score

m/z

Gene names

20141014\_fract22\_dyn\_5ul\_G6\_01\_601

33398

TOF; CID

72.58

928.51

PET117

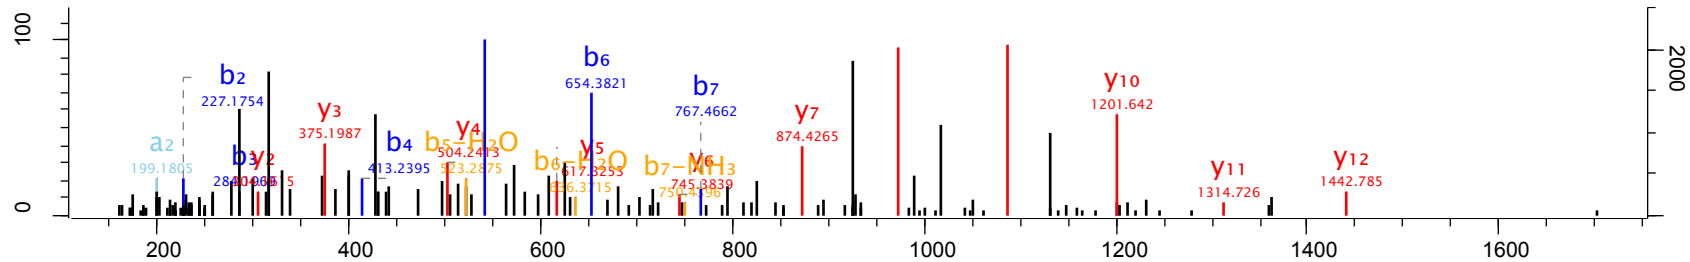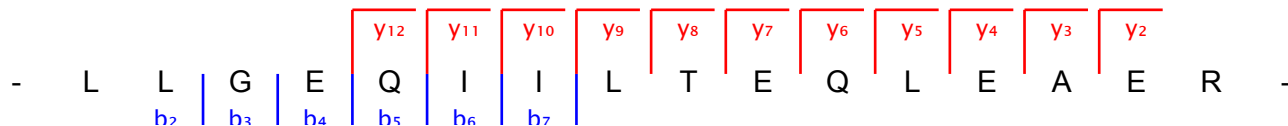

Raw file

20141014\_fract23\_dyn\_5ul\_G7\_01\_602

Scan

8390

Method

TOF; CID

Score

90.61

m/z

527.61

Gene names

ZNF34

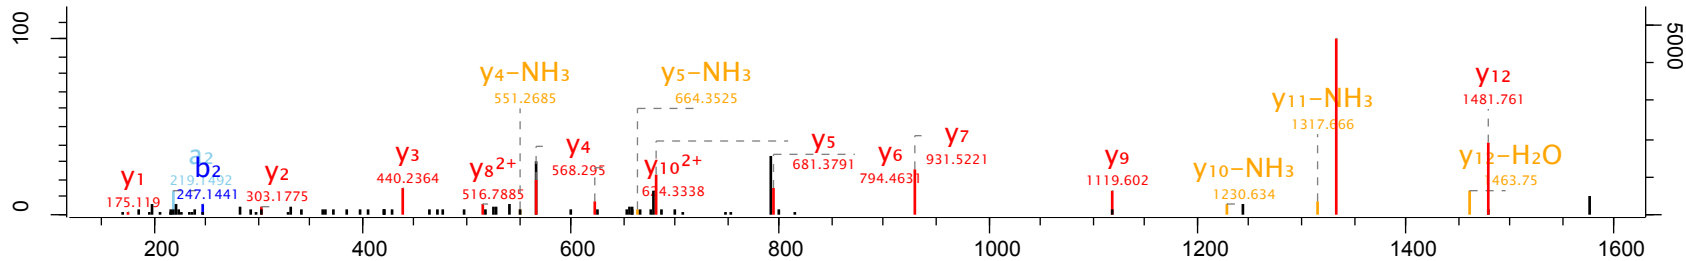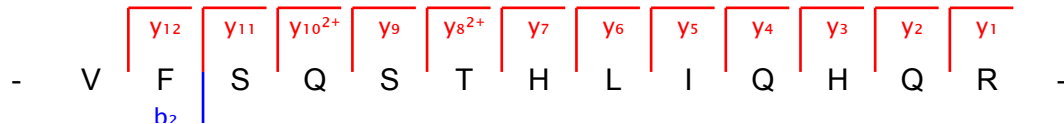

Raw file

20141014\_fract23\_dyn\_5ul\_G7\_01\_602

Scan

10940

Method

TOF; CID

Score

103.74

m/z

467.77

Gene names

ENTPD4

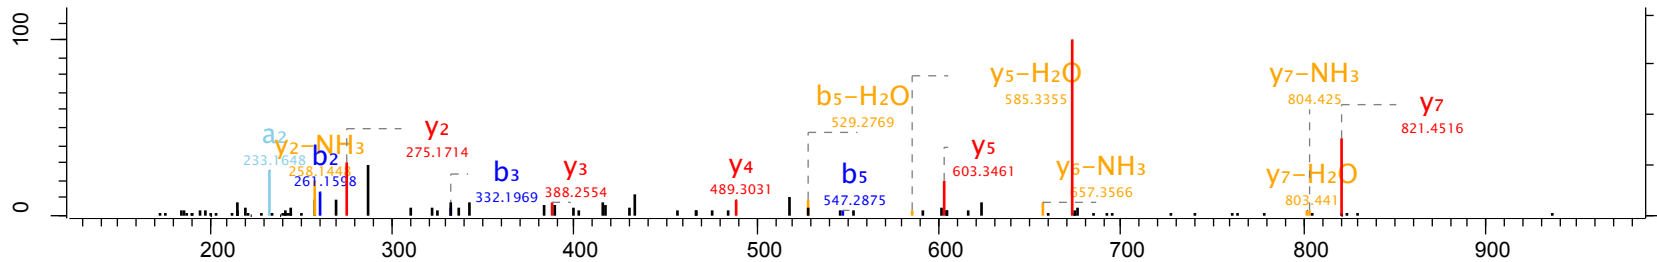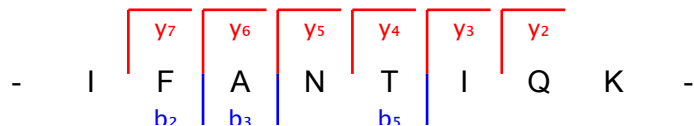

| Raw file                           | Scan  | Method   | Score | m/z    | Gene names |
|------------------------------------|-------|----------|-------|--------|------------|
| 20141014_fract23_dyn_5ul_G7_01_602 | 11199 | TOF; CID | 87.18 | 582.33 | MIDN       |

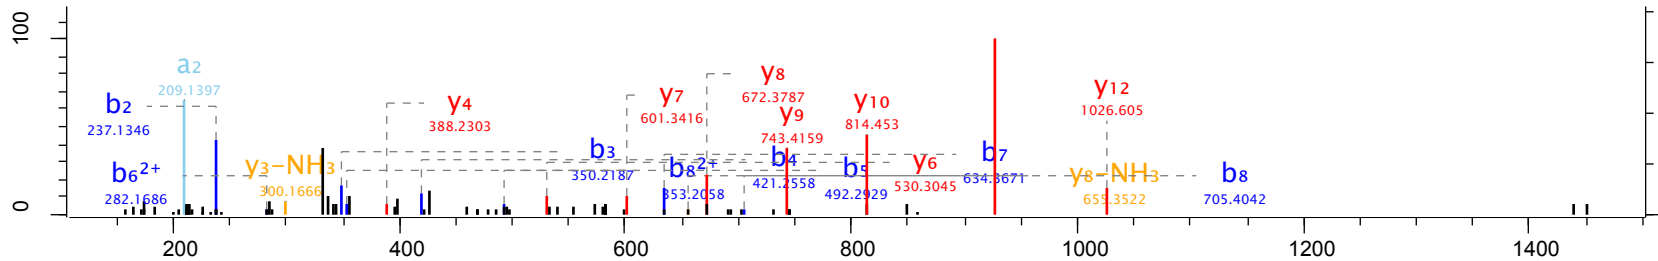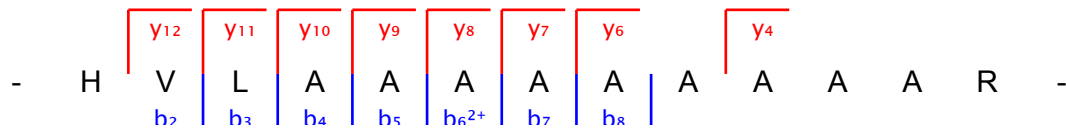

Raw file

20141014\_fract23\_dyn\_5ul\_G7\_01\_602

Scan

12421

Method

TOF; CID

Score

55.66

m/z

587.65

Gene names

RBL2

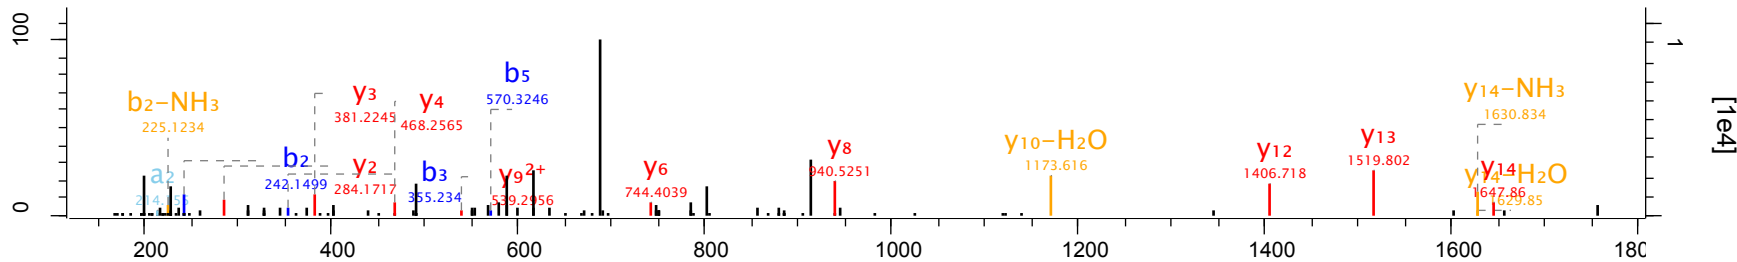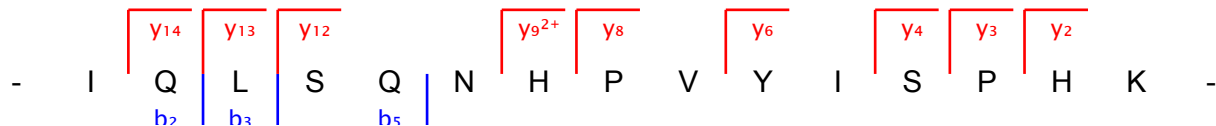

| Raw file                           | Scan  | Method   | Score | m/z    | Gene names |
|------------------------------------|-------|----------|-------|--------|------------|
| 20141014_fract23_dyn_5ul_G7_01_602 | 13733 | TOF; CID | 94.12 | 625.86 | FKRP       |

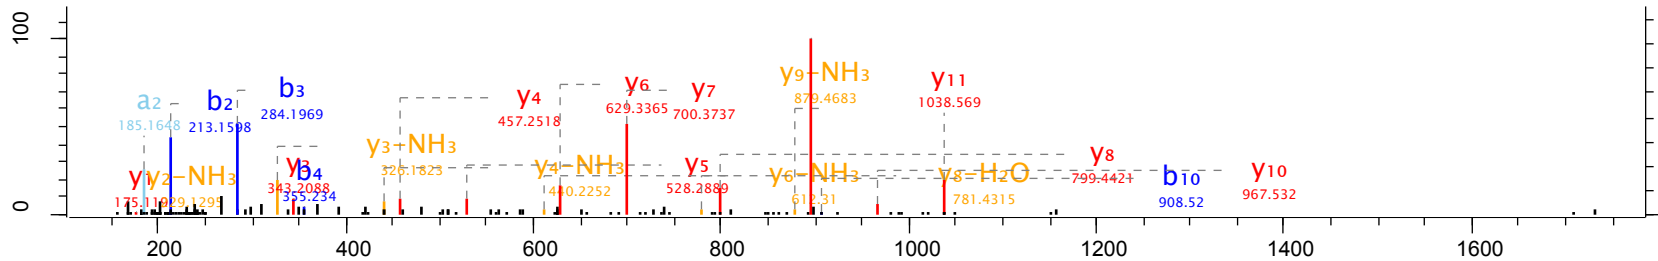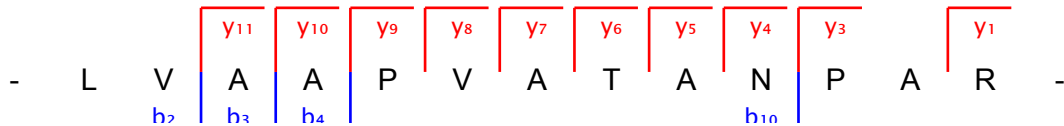



| Raw file                           | Scan  | Method   | Score | m/z    | Gene names |
|------------------------------------|-------|----------|-------|--------|------------|
| 20141014_fract23_dyn_5ul_G7_01_602 | 16291 | TOF; CID | 117.1 | 469.76 | APH1A      |

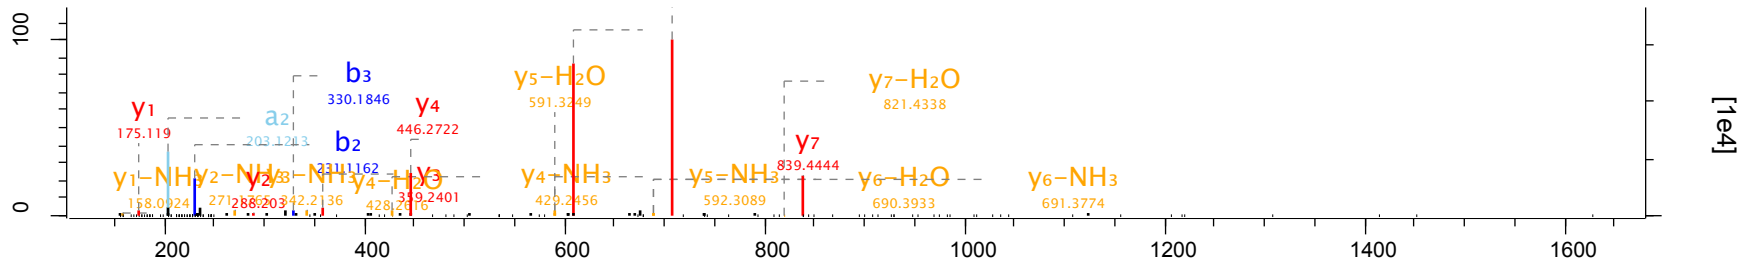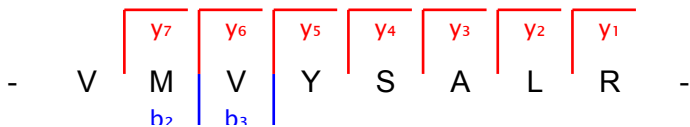

Raw file

Scan

Method

Score

m/z

Gene names

20141014\_fract23\_dyn\_5ul\_G7\_01\_602

17175

TOF; CID

75.5

632.35

TTBK2

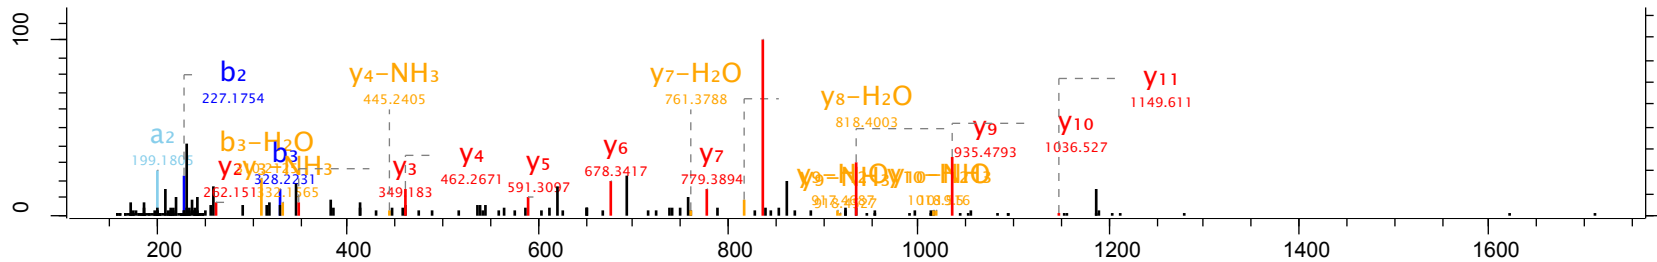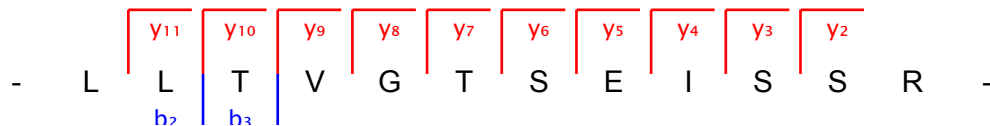

Raw file

20141014\_fract23\_dyn\_5ul\_G7\_01\_602

Scan

17490

Method

TOF; CID

Score

99.97

m/z

602.3

Gene names

GALNT11

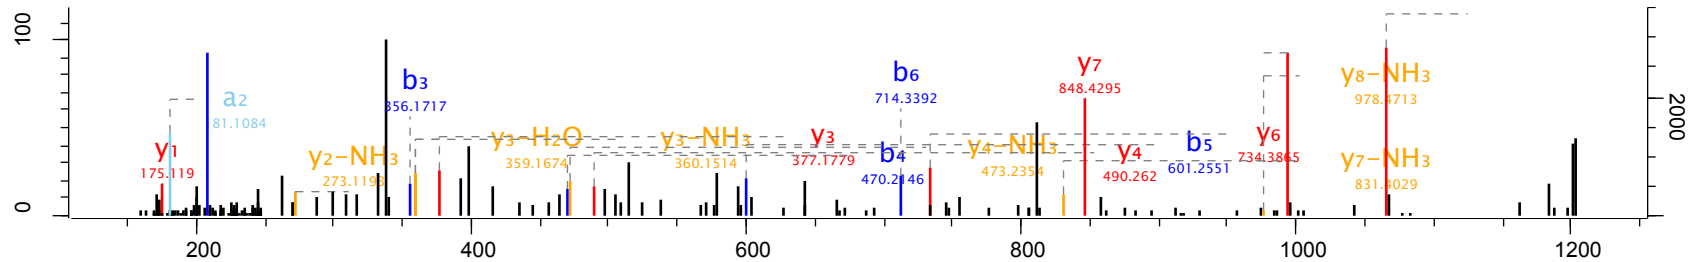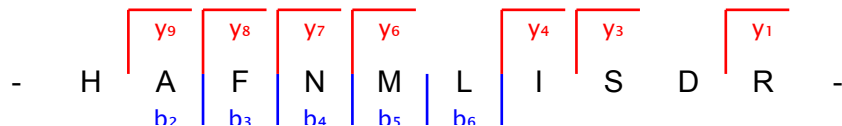

Raw file

20141014\_fract23\_dyn\_5ul\_G7\_01\_602

Scan

22769

Method

TOF; CID

Score

149.59

m/z

849.38

Gene names

PLP2

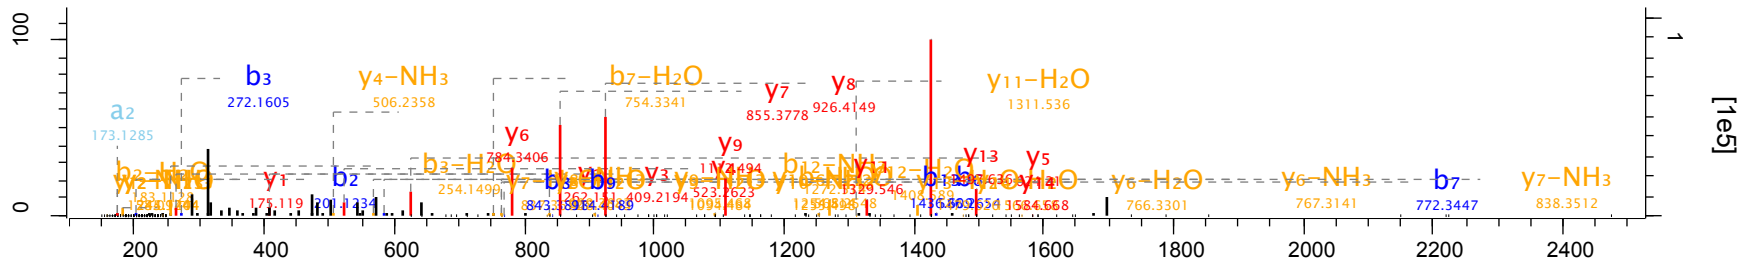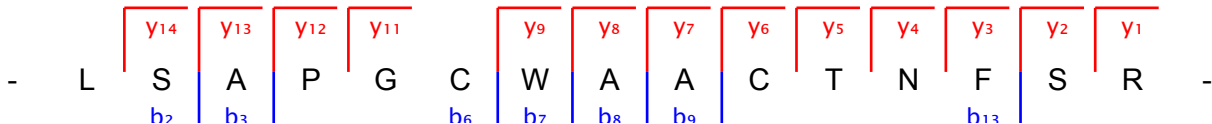

Raw file

20141014\_fract23\_dyn\_5ul\_G7\_01\_602

Scan

23436

Method

TOF; CID

Score

81.7

m/z

1127.07

Gene names

MYADM

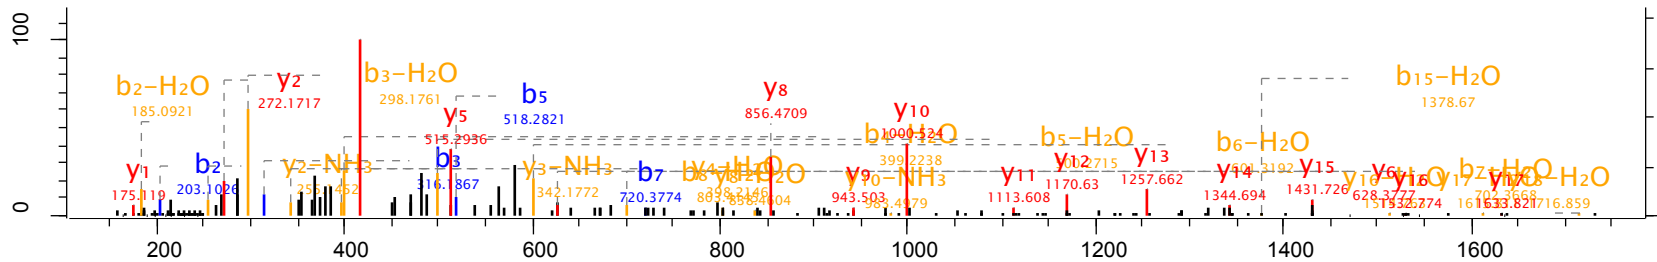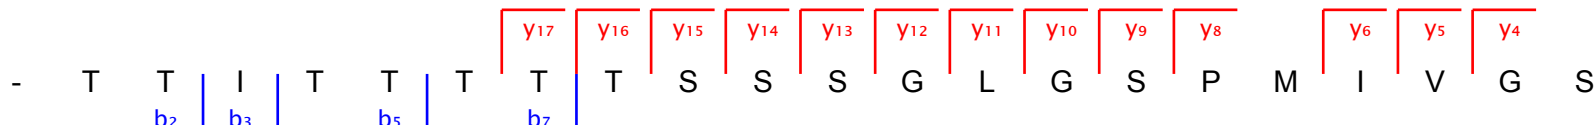

Raw file

Scan

Method

Score

m/z

Gene names

20141014\_fract23\_dyn\_5ul\_G7\_01\_602

25922

TOF; CID

74.44

836.41

TMEM39A

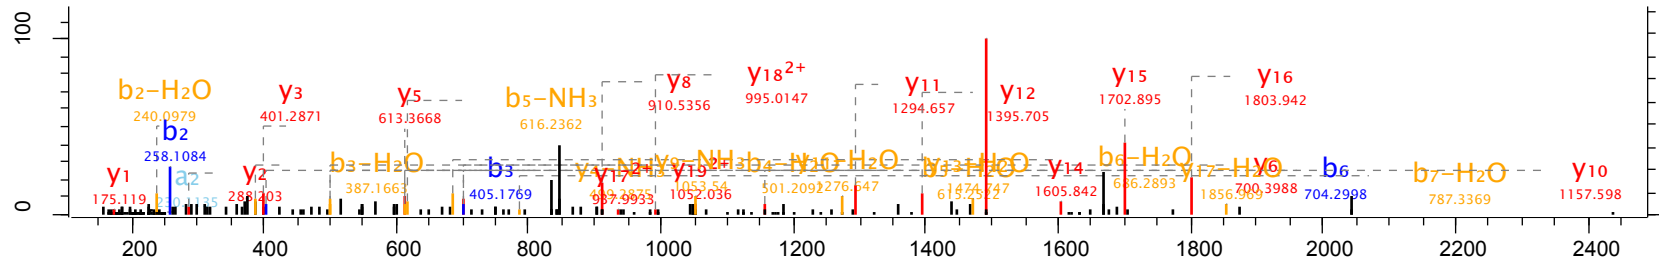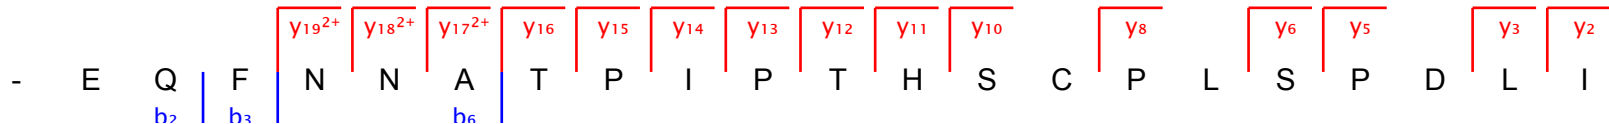

Raw file

20141014\_fract23\_dyn\_5ul\_G7\_01\_602

Scan

30065

Method

TOF; CID

Score

93.65

m/z

714.39

Gene names

MPV17

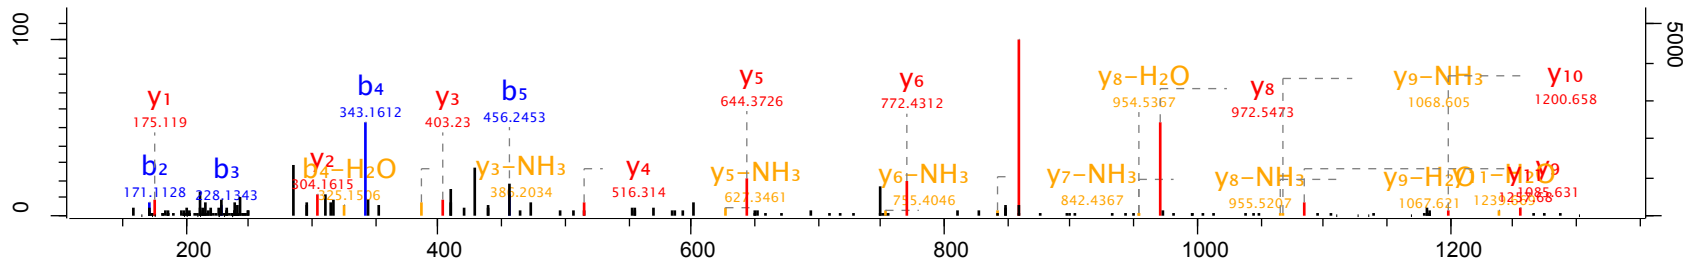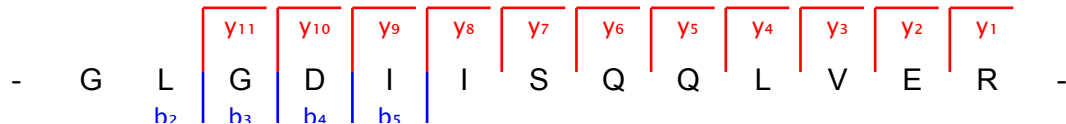

Raw file

20141014\_fract23\_dyn\_5ul\_G7\_01\_602

Scan

30090

Method

TOF; CID

Score

56.13

m/z

908.73

Gene names

TSPAN4

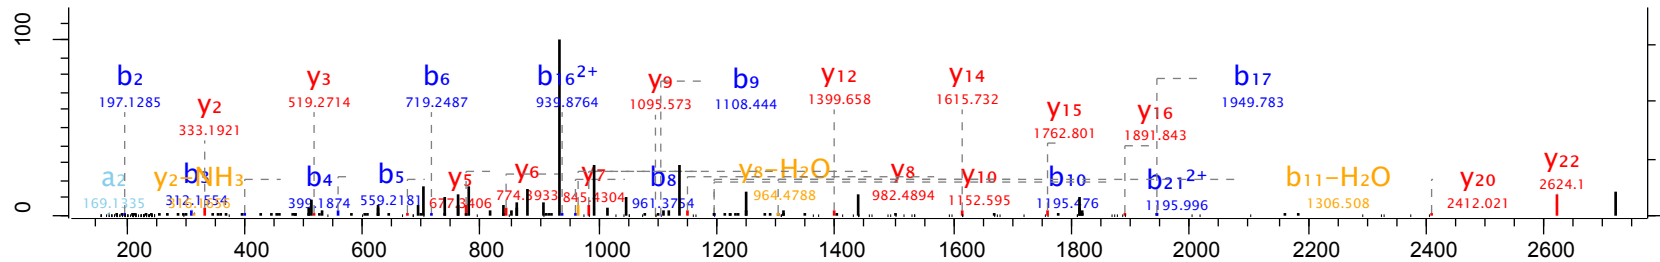

[1e4]

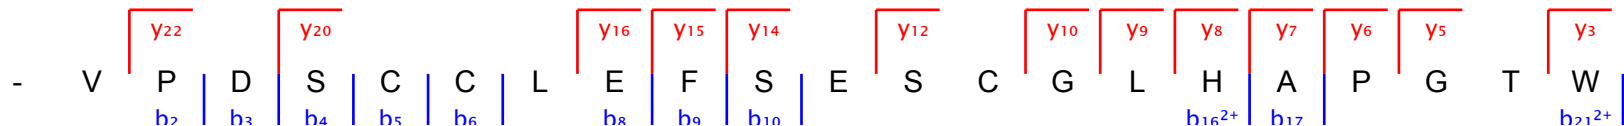



| Raw file                           | Scan  | Method   | Score | m/z    | Gene names |
|------------------------------------|-------|----------|-------|--------|------------|
| 20141014_fract23_dyn_5ul_G7_01_602 | 35313 | TOF; CID | 65.84 | 698.87 | PRKD2      |

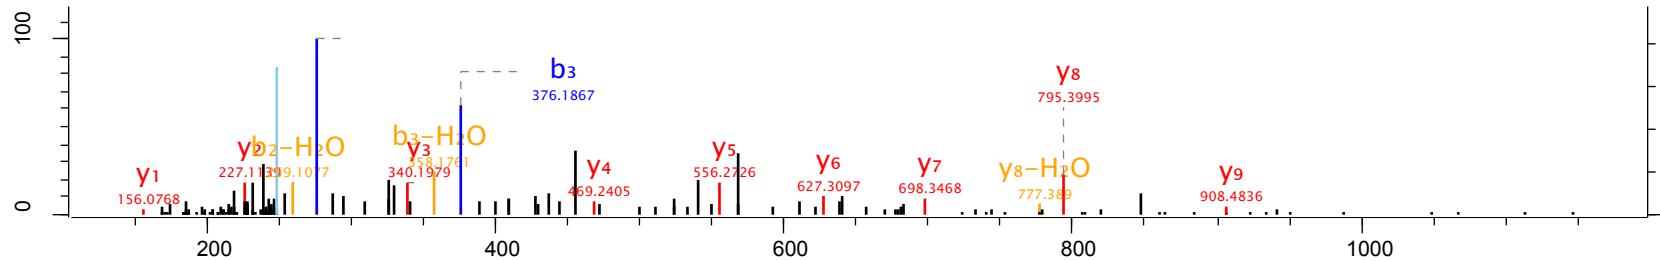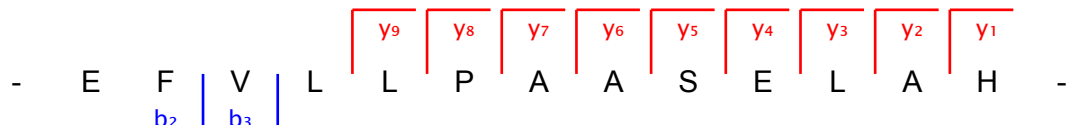

| Raw file                           | Scan  | Method   | Score | m/z     | Gene names |
|------------------------------------|-------|----------|-------|---------|------------|
| 20141014_fract23_dyn_5ul_G7_01_602 | 37784 | TOF; CID | 51.71 | 1199.88 | MYEOV2     |

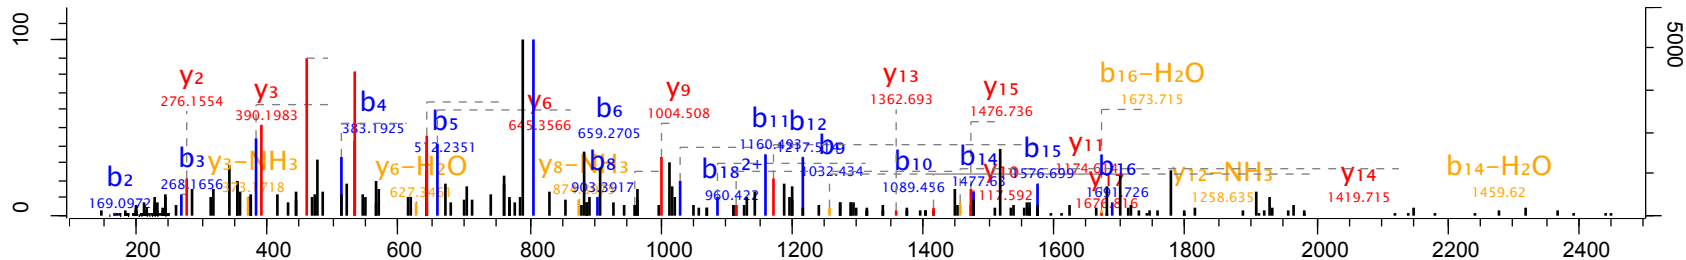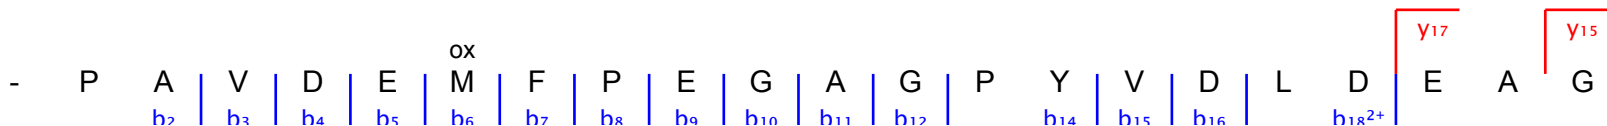

Raw file

20141014\_fract24\_dyn\_5ul\_G8\_01\_603

Scan

12552

Method

TOF; CID

Score

95.5

m/z

528.81

Gene names

TTC7B

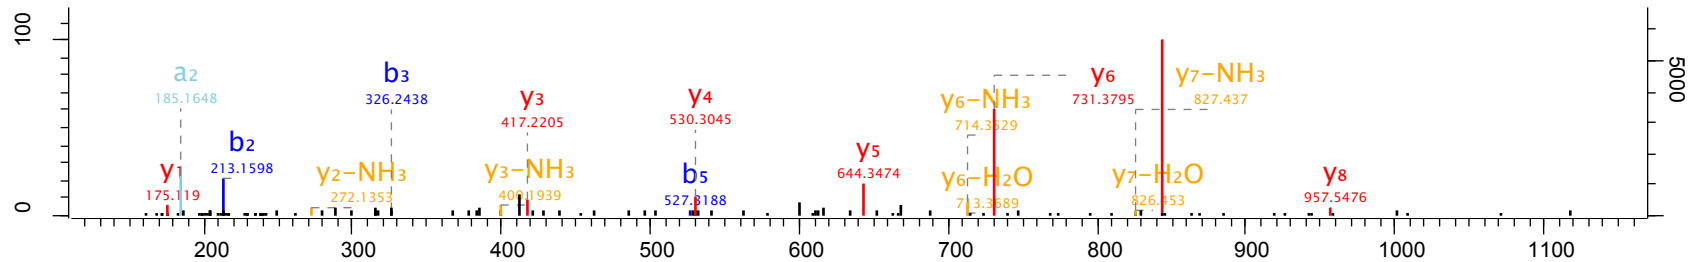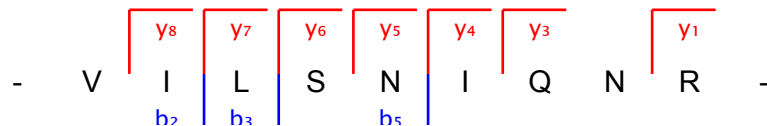

Raw file

20141014\_fract24\_dyn\_5ul\_G8\_01\_603

Scan

16867

Method

TOF; CID

Score

69.35

m/z

483.56

Gene names

PRNP

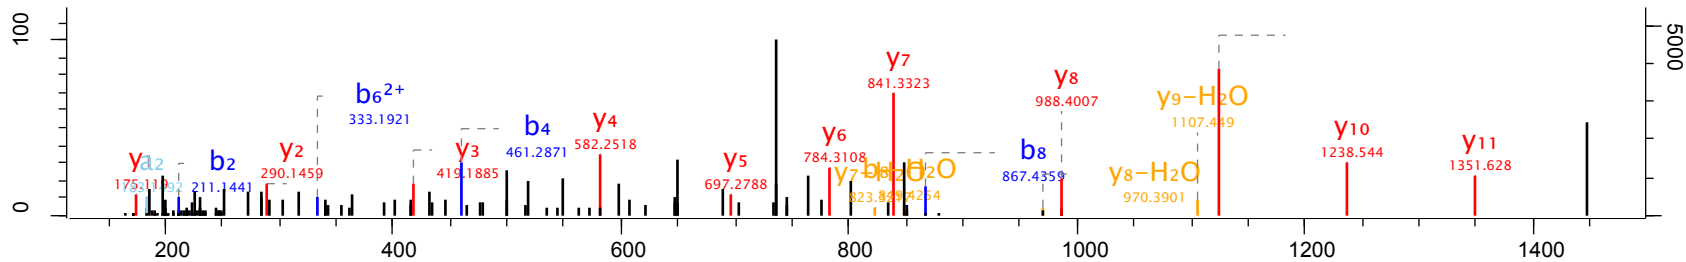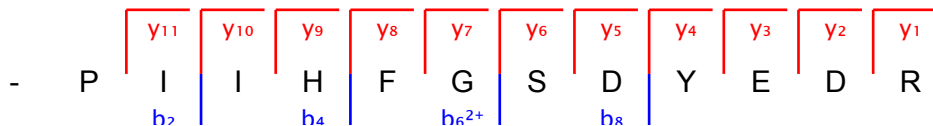

Raw file

20141014\_fract24\_dyn\_5ul\_G8\_01\_603

Scan

18665

Method

TOF; CID

Score

69.72

m/z

638.32

Gene names

PIGB

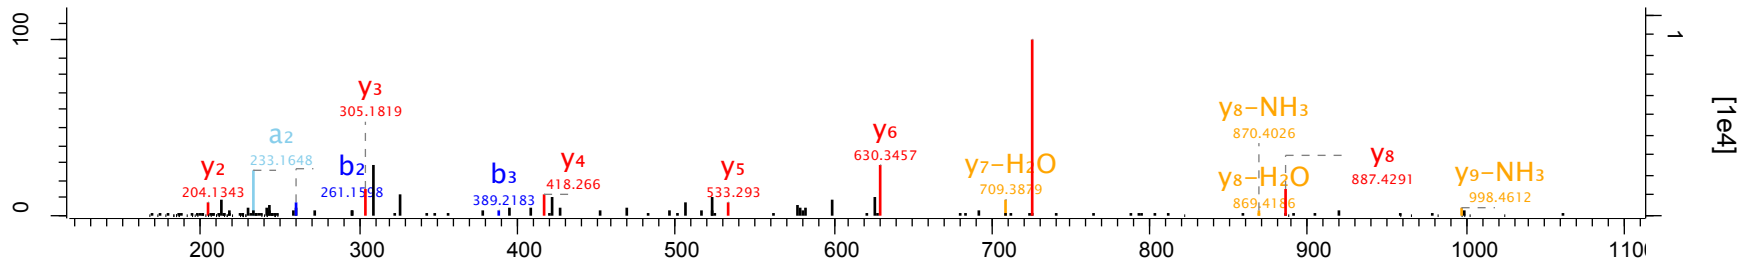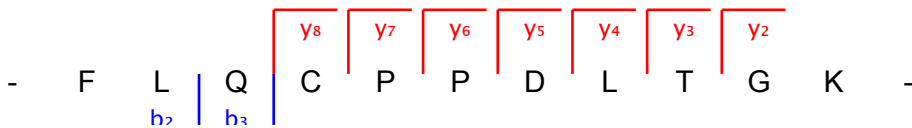

Raw file

Scan

Method

Score

m/z

Gene names

20141014\_fract24\_dyn\_5ul\_G8\_01\_603

20741

TOF; CID

68.04

800.44

ZCCHC10

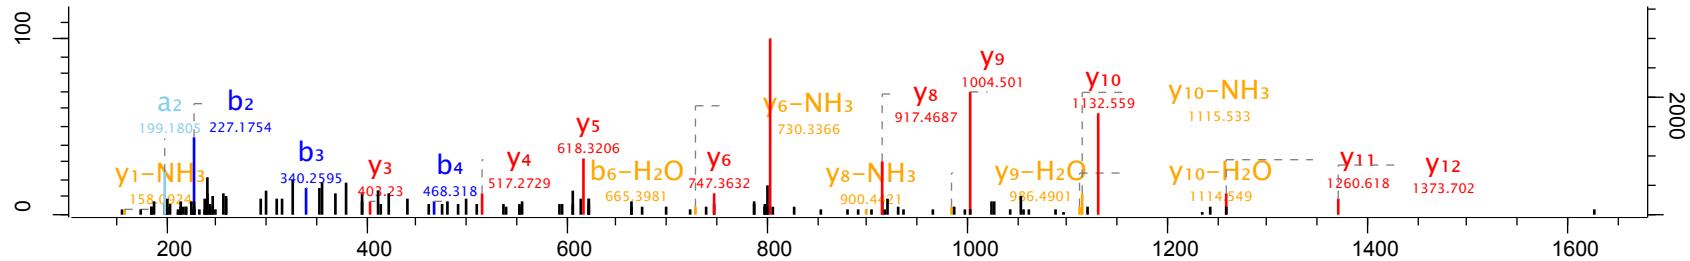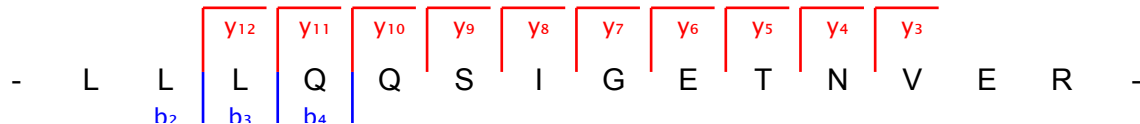

Raw file

20141014\_fract24\_dyn\_5ul\_G8\_01\_603

Scan

21101

Method

TOF; CID

Score

81.63

m/z

507.96

Gene names

EPM2A

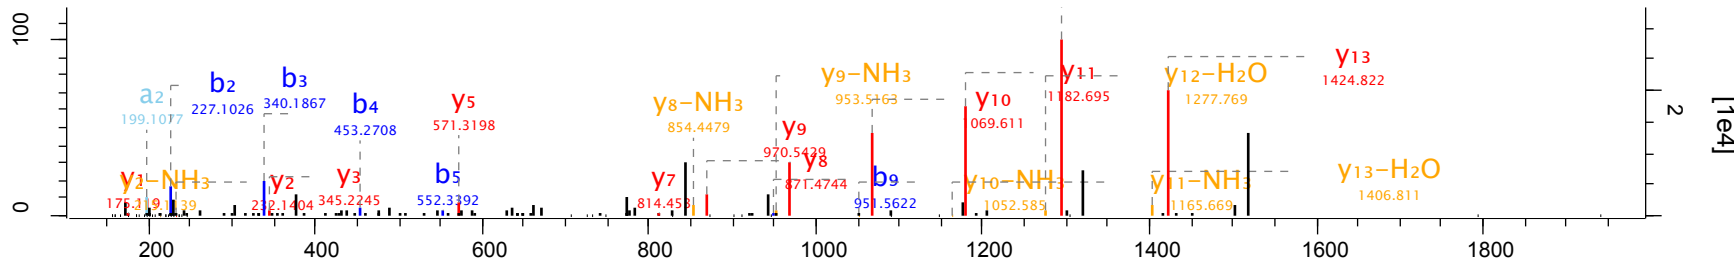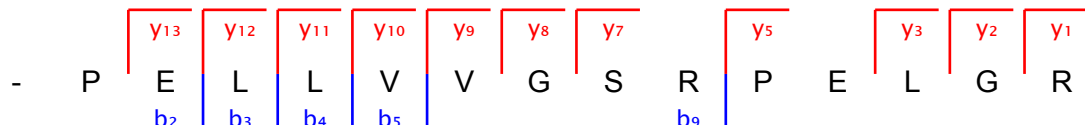

| Raw file                           | Scan  | Method   | Score | m/z    | Gene names |
|------------------------------------|-------|----------|-------|--------|------------|
| 20141014_fract24_dyn_5ul_G8_01_603 | 27723 | TOF; CID | 84.51 | 891.45 | TAF11      |

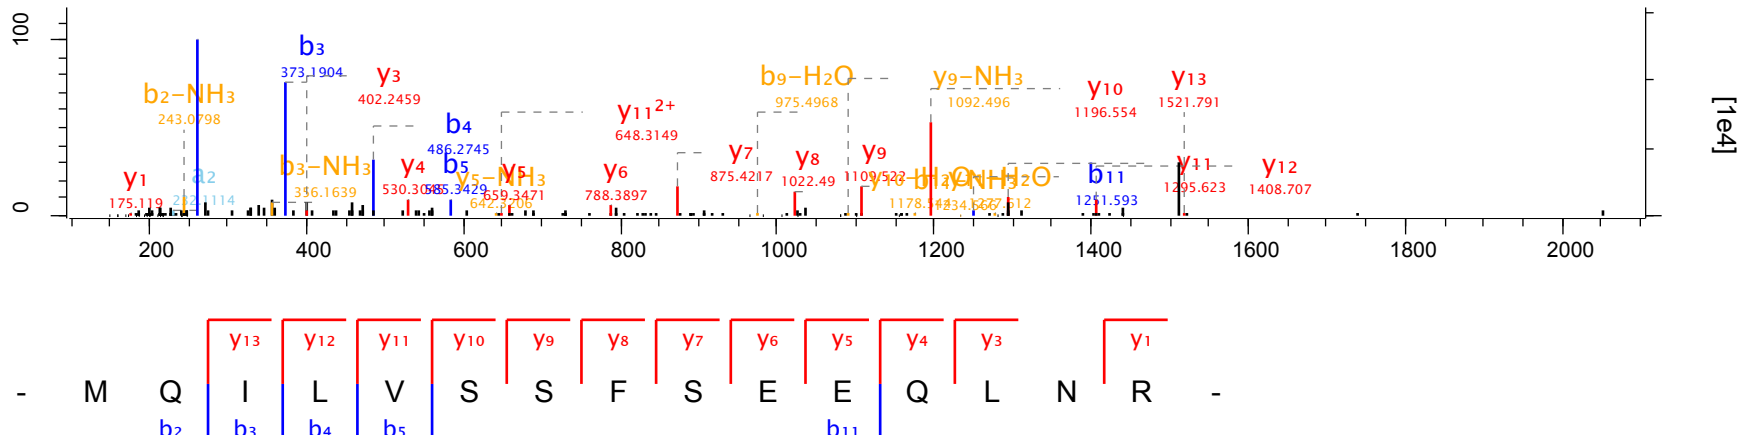



Raw file

Scan

Method

Score

m/z

Gene names

20141014\_fract24\_dyn\_5ul\_G8\_01\_603

32521

TOF; CID

91.55

670.33

LRRTM4

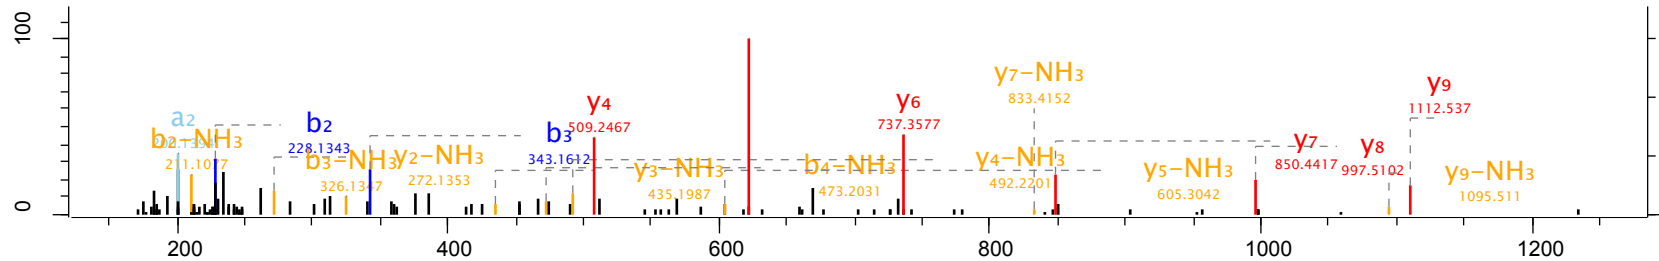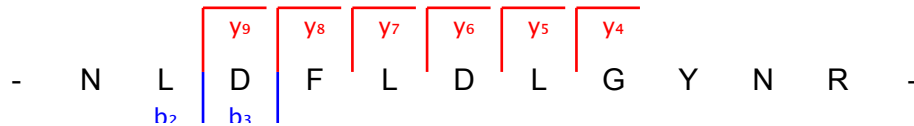

Raw file

20141014\_fract24\_dyn\_5ul\_G8\_01\_603

Scan

32753

Method

TOF; CID

Score

58.69

m/z

803.41

Gene names

CEP68

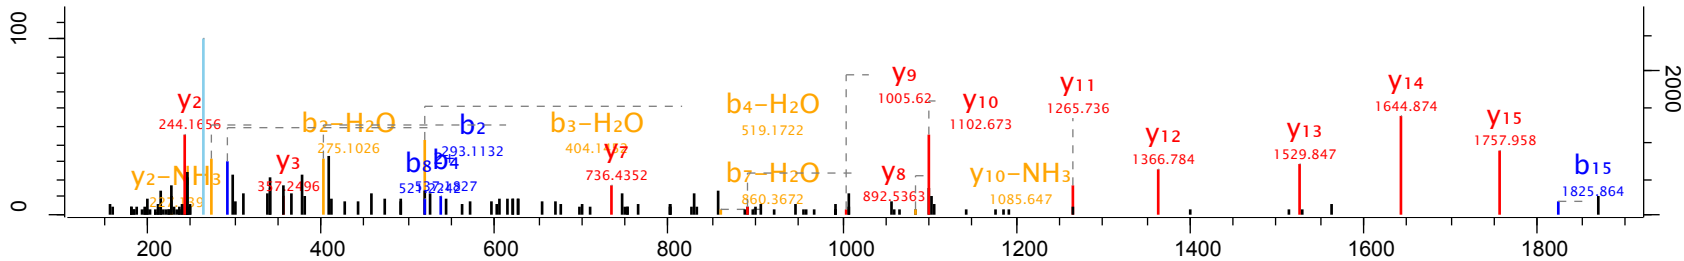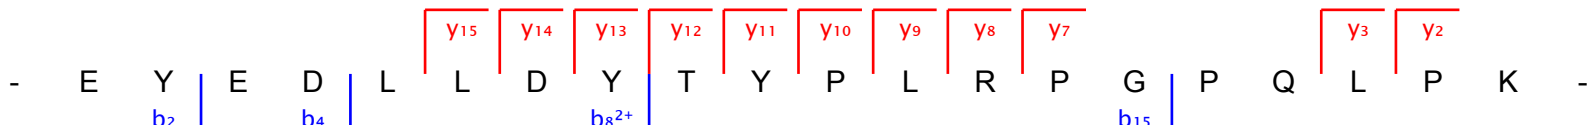

Raw file

20141014\_fract24\_dyn\_5ul\_G8\_01\_603

Scan

33196

Method

TOF; CID

Score

52.07

m/z

712.36

Gene names

SMIM15

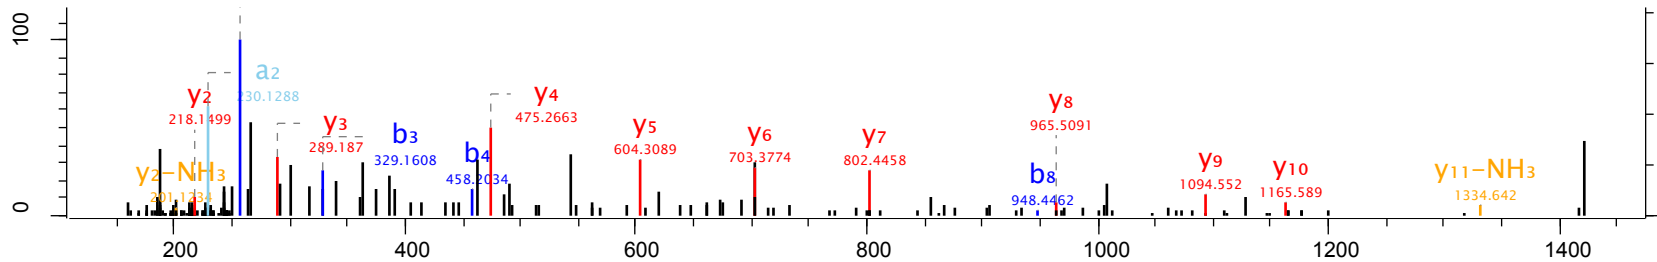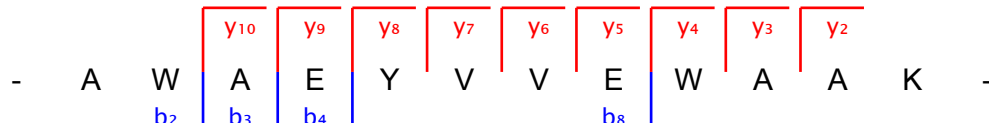

Raw file

20141014\_fract24\_dyn\_5ul\_G8\_01\_603

Scan

34885

Method

TOF; CID

Score

103.83

m/z

814.95

Gene names

RCE1

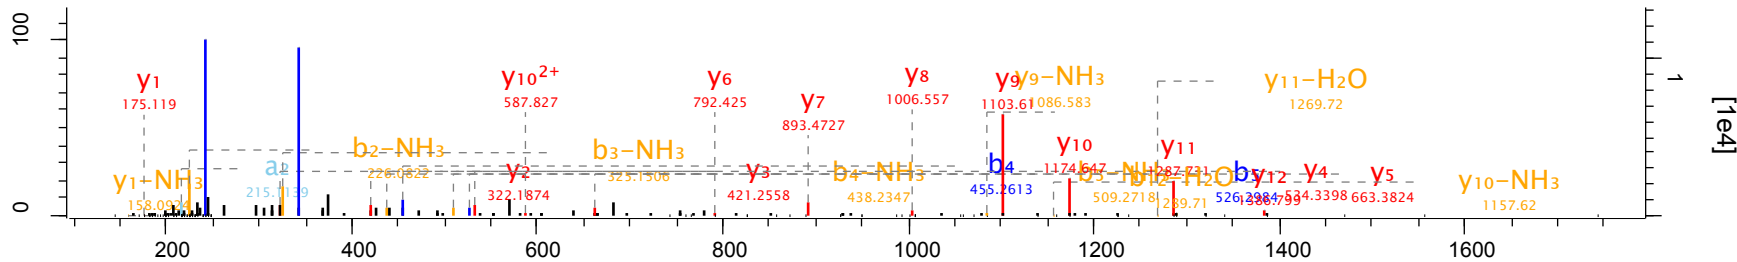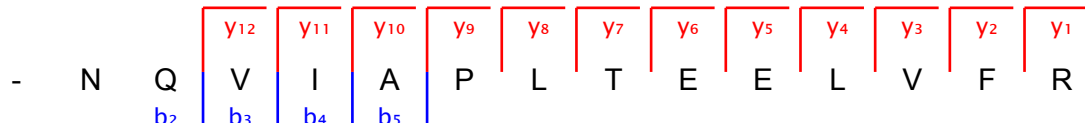

Supplement: supp_M114.047407_mcp.M114.047407-12.pdf [file supp_M114.047407_mcp.M114.047407-12.pdf]
