# Supplementary material for: The Impact II, a Very High-Resolution Quadrupole Time-of-Flight Instrument (QTOF) for Deep Shotgun Proteomics
Source: PubMed Central journal article supplement (PMC4587313; doi:10.1074/mcp.m114.047407), 2015-05-19

| Raw file                          | Scan | Method   | Score  | m/z    | Gene names |
|-----------------------------------|------|----------|--------|--------|------------|
| 20140918_fract1_dyn_5ul_D1_01_367 | 5371 | TOF; CID | 131.06 | 330.19 | HMGN4      |

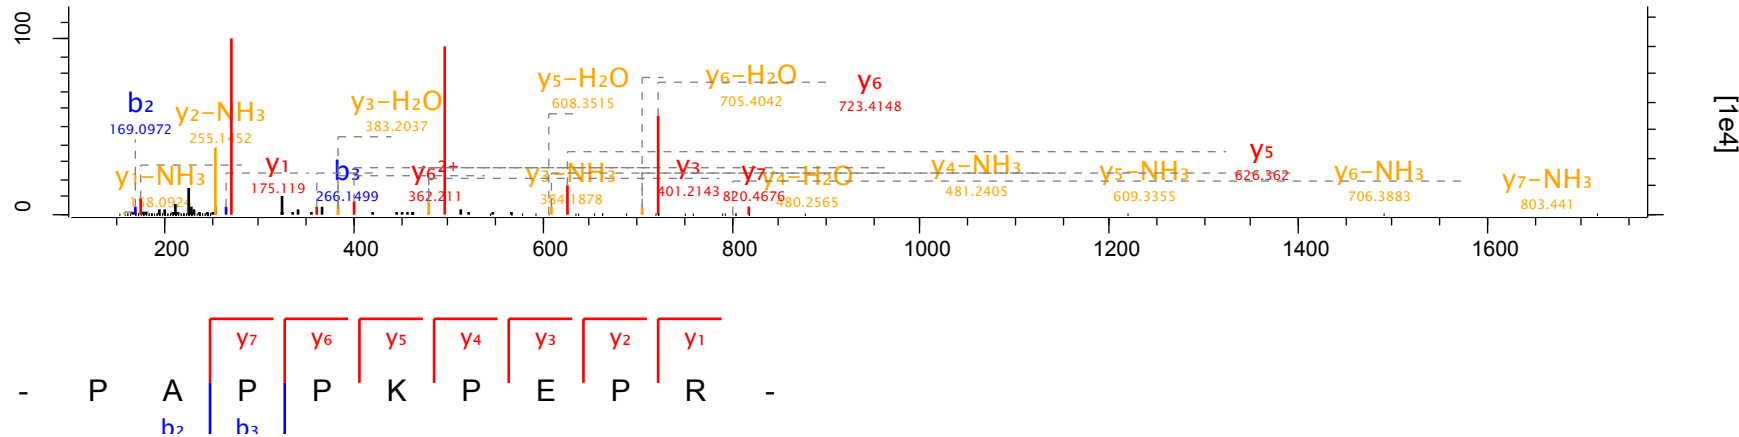

| Raw file                          | Scan  | Method   | Score | m/z    | Gene names |
|-----------------------------------|-------|----------|-------|--------|------------|
| 20140918_fract1_dyn_5ul_D1_01_367 | 14149 | TOF; CID | 91.31 | 538.29 | PTMS       |

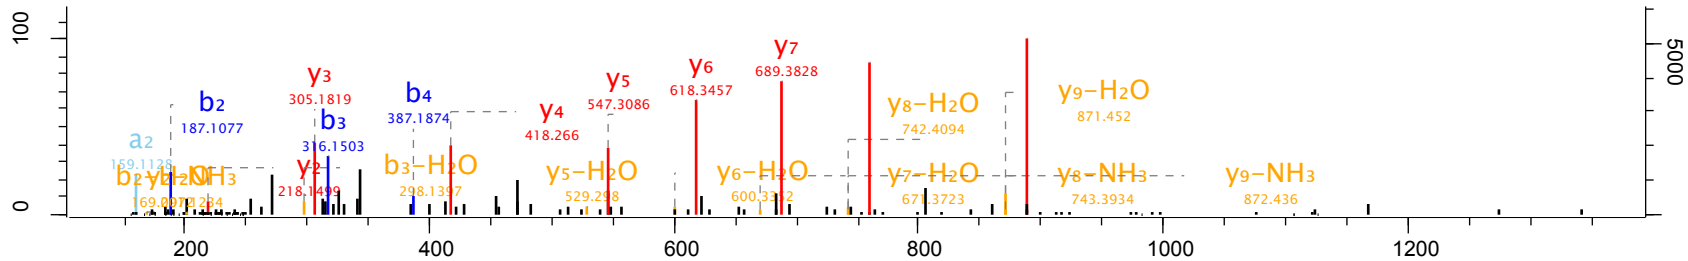

Protein sequence: - S V E A A A E L S A K -

Fragmentation sites (b ions): b<sub>2</sub> (between V and E), b<sub>3</sub> (between E and A), b<sub>4</sub> (between A and A).

Fragmentation sites (y ions): y<sub>2</sub> (between A and K), y<sub>3</sub> (between S and A), y<sub>4</sub> (between L and S), y<sub>5</sub> (between E and L), y<sub>6</sub> (between A and E), y<sub>7</sub> (between A and A), y<sub>8</sub> (between A and E), y<sub>9</sub> (between V and E).

Raw file

20140918\_fract1\_dyn\_5ul\_D1\_01\_367

Scan

19764

Method

TOF; CID

Score

58.71

m/z

576.26

Gene names

GCA

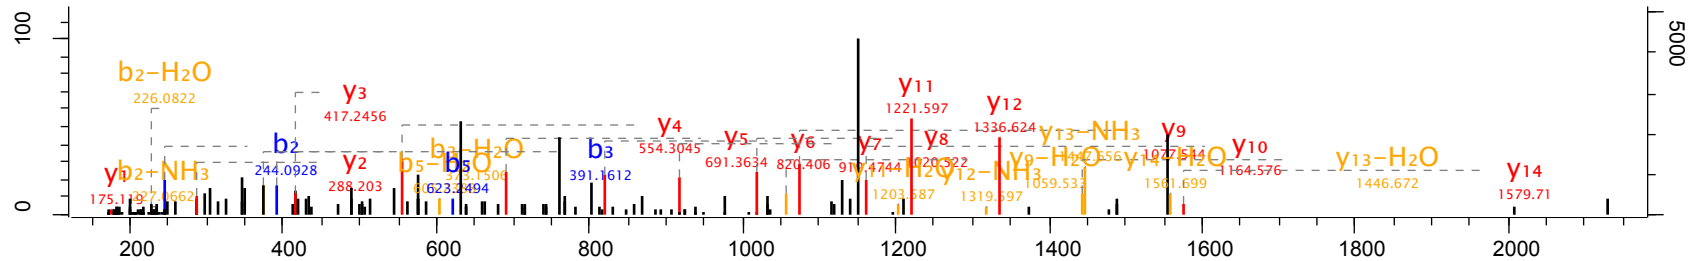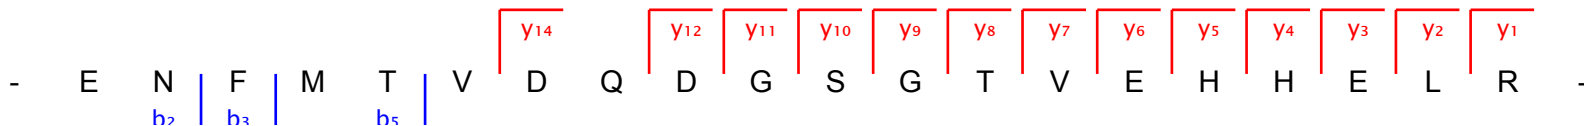

| Raw file                          | Scan  | Method   | Score | m/z    | Gene names |
|-----------------------------------|-------|----------|-------|--------|------------|
| 20140918_fract1_dyn_5ul_D1_01_367 | 25911 | TOF; CID | 106.4 | 597.31 | FBXL17     |

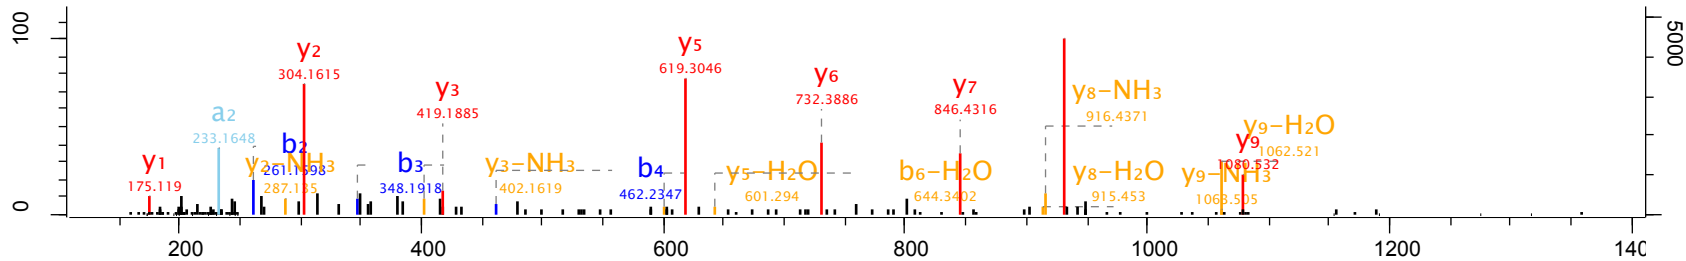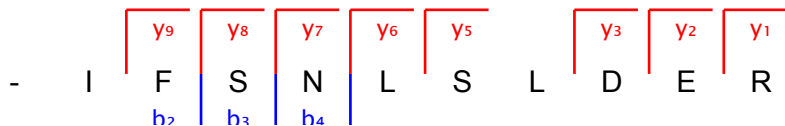

Raw file

20140918\_fract1\_dyn\_5ul\_D1\_01\_367

Scan

27688

Method

TOF; CID

Score

115.78

m/z

640.34

Gene names

METTL23

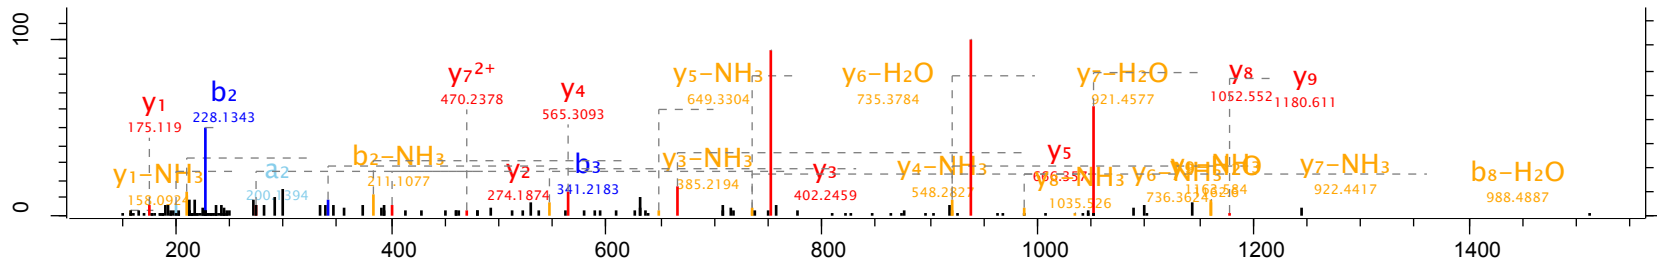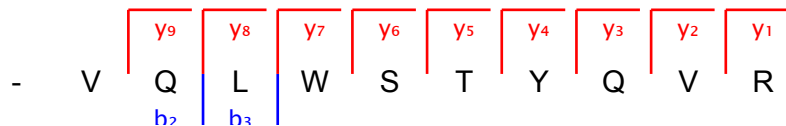

Raw file

20140918\_fract1\_dyn\_5ul\_D1\_01\_367

Scan

29299

Method

TOF; CID

Score

95.27

m/z

469.25

Gene names

CHAC1

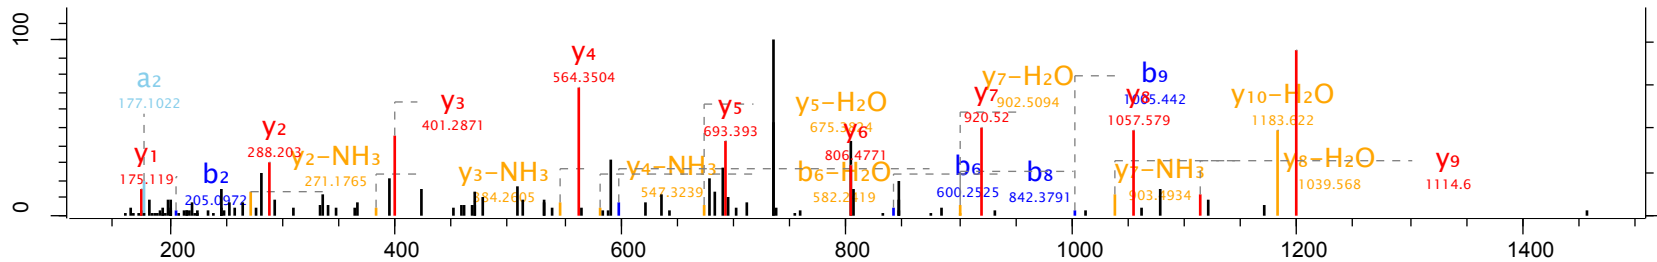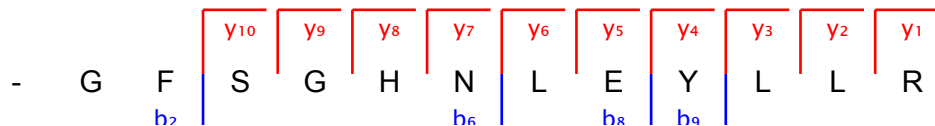

Raw file

20140918\_fract1\_dyn\_5ul\_D1\_01\_367

Scan

33339

Method

TOF; CID

Score

47.56

m/z

772.74

Gene names

PLLP

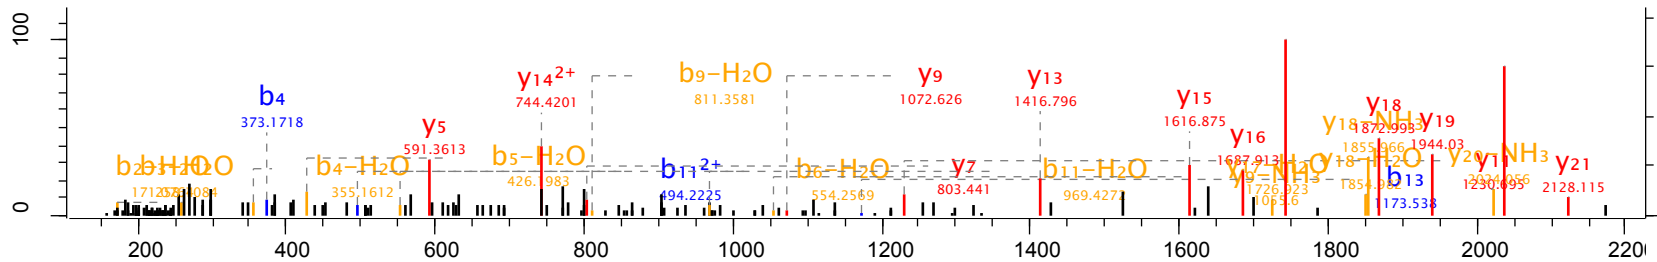

- T S S P A Q G A E A S V S A L R P D L G F

$y_{21}$   $y_{20}$   $y_{19}$   $y_{18}$   $y_{17}$   $y_{16}$   $y_{15}$   $y_{14}^{2+}$   $y_{13}$   $y_{11}$   $y_9$   $y_7$   $y_5$   
 $b_4$   $b_{11}^{2+}$   $b_{13}$

| Raw file                          | Scan | Method   | Score | m/z    | Gene names |
|-----------------------------------|------|----------|-------|--------|------------|
| 20140918_fract2_dyn_5ul_D2_01_369 | 8659 | TOF; CID | 60.17 | 478.76 | EPM2A      |

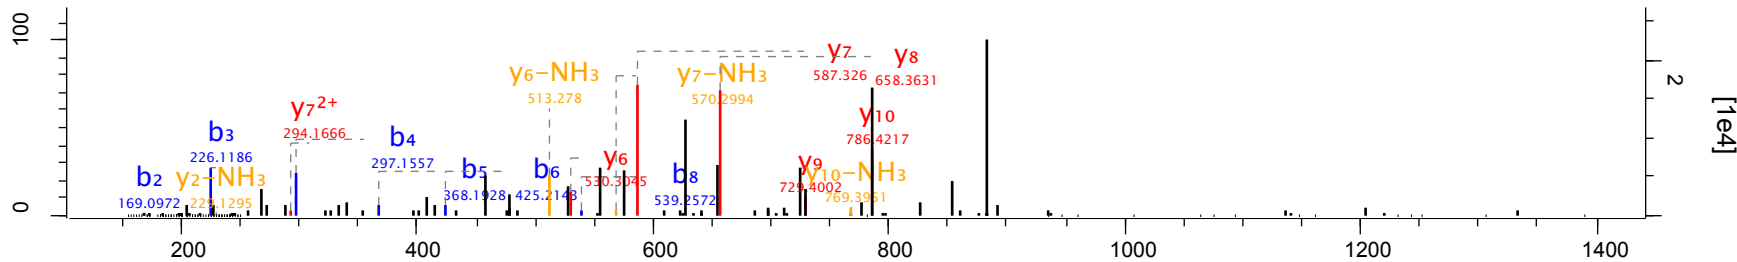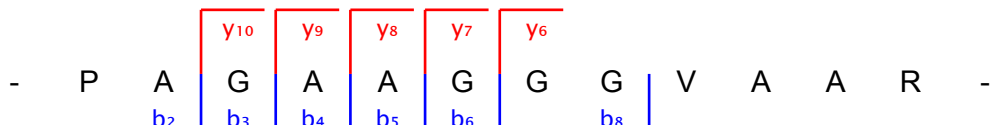



Raw file

20140918\_fract2\_dyn\_5ul\_D2\_01\_369

Scan

13430

Method

TOF; CID

Score

130.56

m/z

720.31

Gene names

LEPROTL1

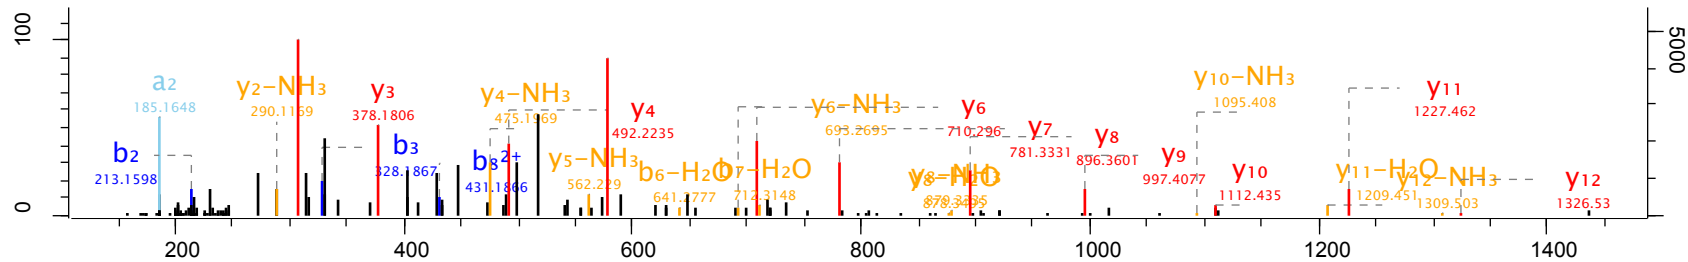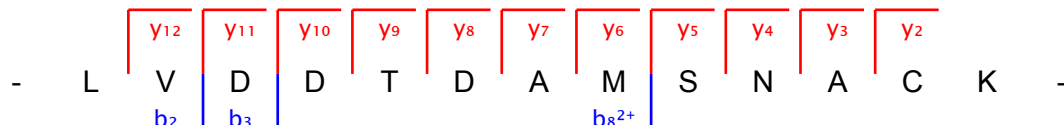

| Raw file                          | Scan  | Method   | Score  | m/z    | Gene names |
|-----------------------------------|-------|----------|--------|--------|------------|
| 20140918_fract2_dyn_5ul_D2_01_369 | 18483 | TOF; CID | 101.65 | 509.26 | PPP2R2A    |

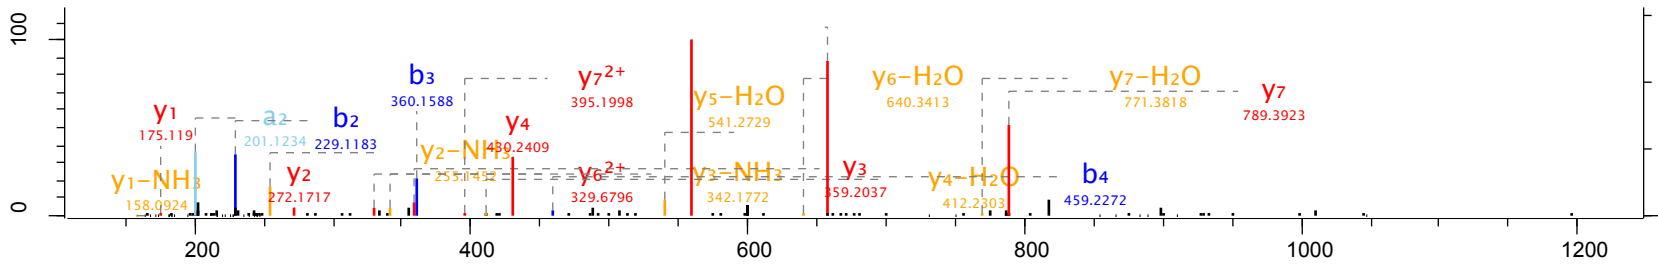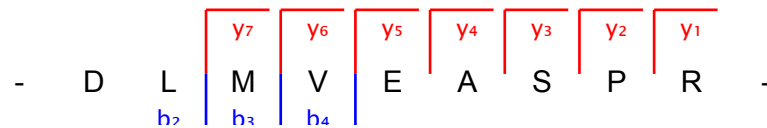

[1e4]

Raw file

20140918\_fract2\_dyn\_5ul\_D2\_01\_369

Scan

41437

Method

TOF; CID

Score

147.64

m/z

1019.55

Gene names

LSM5

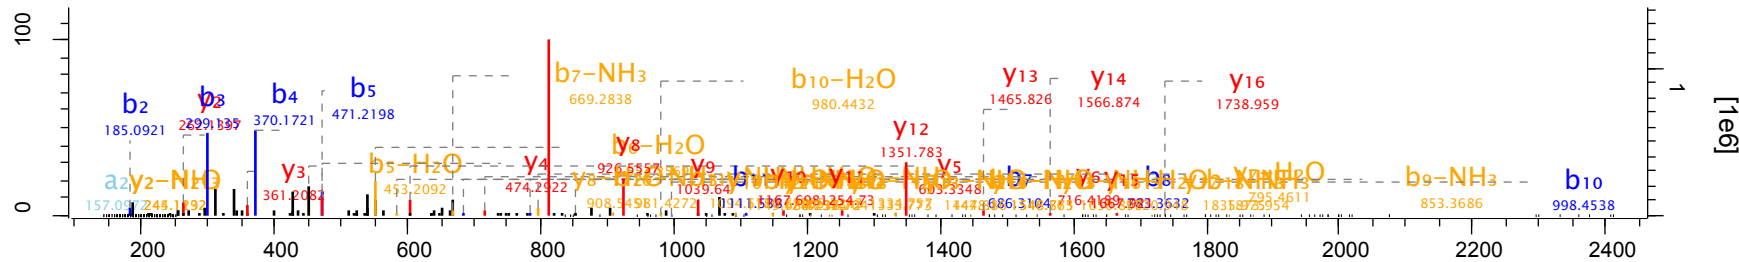

ac

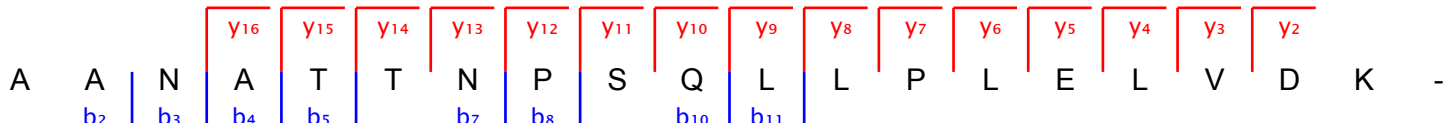

| Raw file                          | Scan  | Method   | Score | m/z    | Gene names |
|-----------------------------------|-------|----------|-------|--------|------------|
| 20140918_fract3_dyn_5ul_D3_01_370 | 12643 | TOF; CID | 39.39 | 627.31 | CYBRD1     |

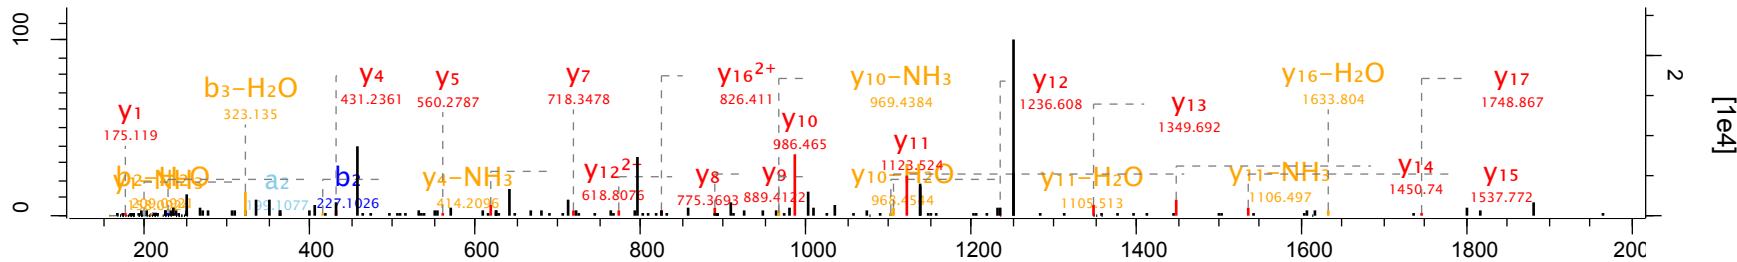

- E P N S T I L H P N G G T E Q G A R -  
 b<sub>2</sub>

Red brackets above the sequence indicate the following y-ion fragmentation sites: y17 (P-N), y16<sup>2+</sup> (N-S), y15 (S-T), y14 (T-I), y13 (I-L), y12 (L-H), y11 (H-P), y10 (P-N), y9 (N-G), y8 (G-G), y7 (G-T), y5 (E-Q), y4 (Q-G), and y1 (A-R).

Raw file

20140918\_fract3\_dyn\_5ul\_D3\_01\_370

Scan

18788

Method

TOF; CID

Score

136.81

m/z

858.93

Gene names

APOC3

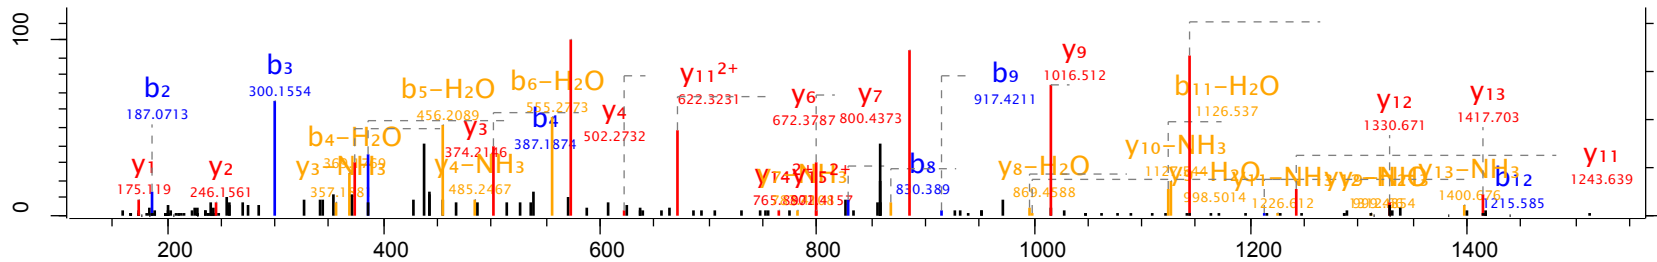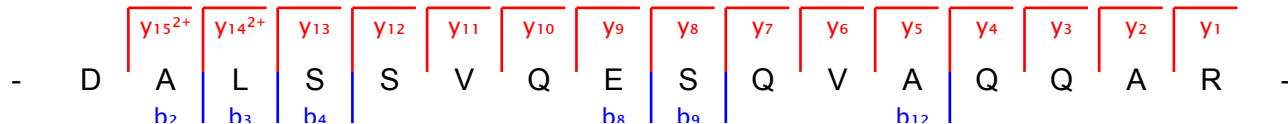

| Raw file                          | Scan  | Method   | Score | m/z    | Gene names |
|-----------------------------------|-------|----------|-------|--------|------------|
| 20140918_fract3_dyn_5ul_D3_01_370 | 27345 | TOF; CID | 89.3  | 586.84 | KATNAL2    |

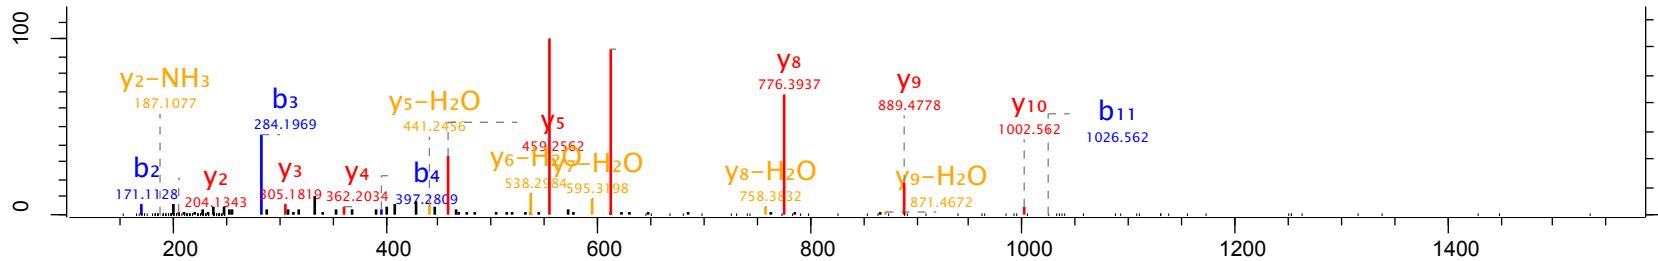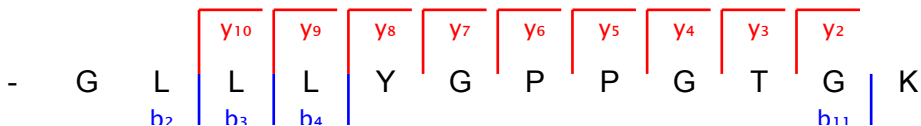

[1e4]

| Raw file                          | Scan  | Method   | Score  | m/z   | Gene names |
|-----------------------------------|-------|----------|--------|-------|------------|
| 20140918_fract3_dyn_5ul_D3_01_370 | 35999 | TOF; CID | 113.71 | 568.8 | MT-ND2     |

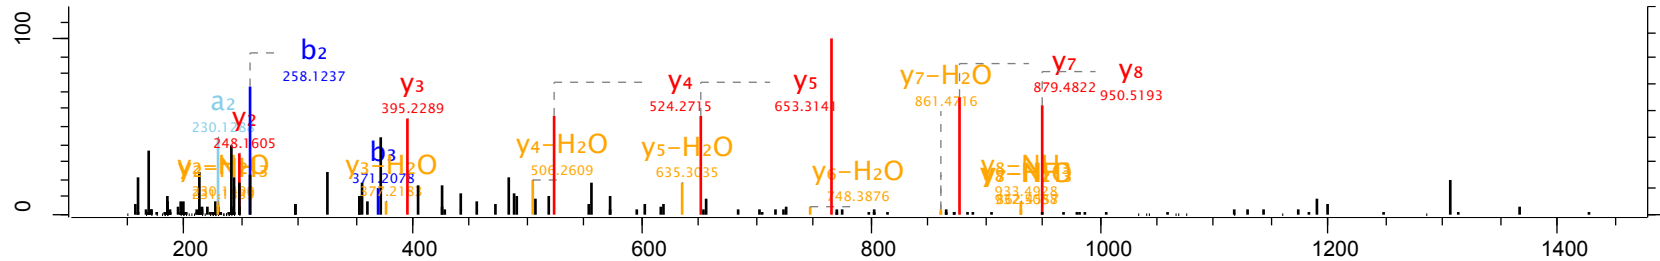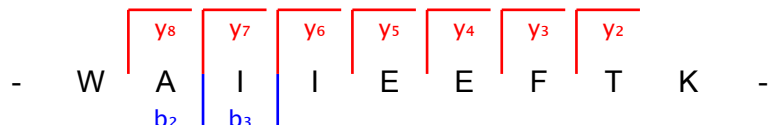

Raw file

20140918\_fract4\_dyn\_5ul\_D4\_01\_371

Scan

7729

Method

TOF; CID

Score

109.48

m/z

476.77

Gene names

ENTPD7

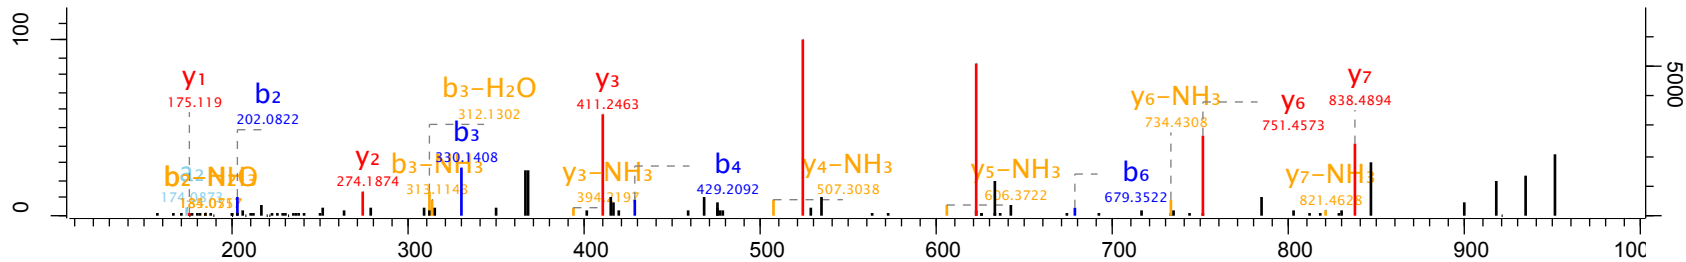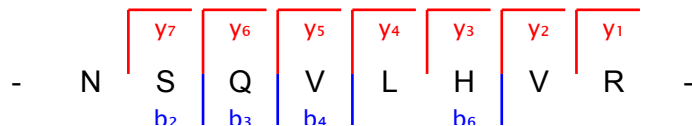



Raw file

20140918\_fract4\_dyn\_5ul\_D4\_01\_371

Scan

8826

Method

TOF; CID

Score

90.79

m/z

464.54

Gene names

DPM3

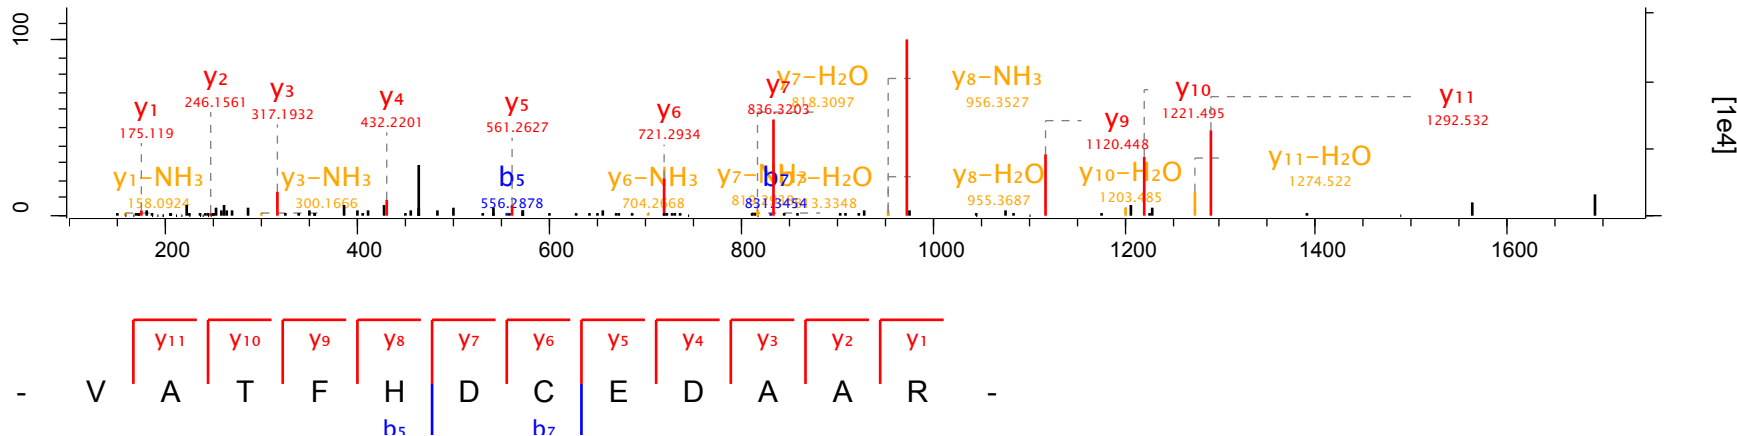

Raw file

20140918\_fract4\_dyn\_5ul\_D4\_01\_371

Scan

13366

Method

TOF; CID

Score

151.98

m/z

459.56

Gene names

CYB561D2

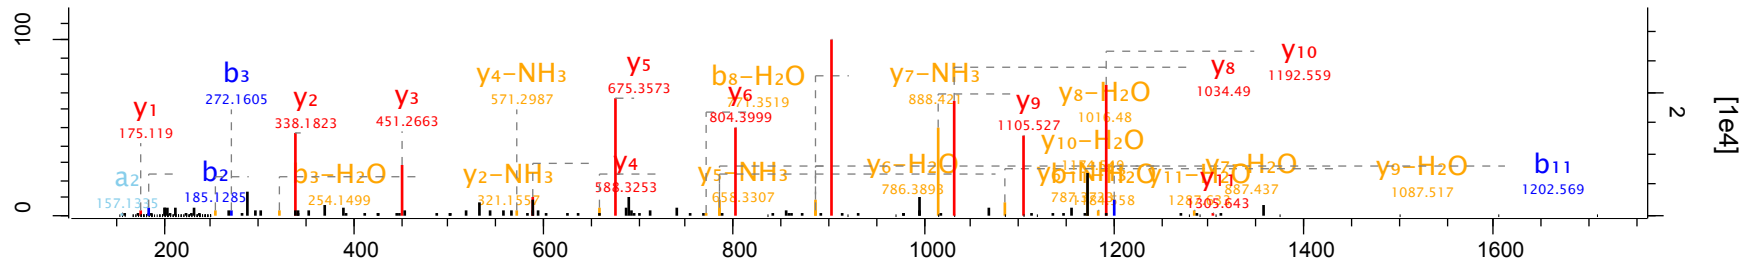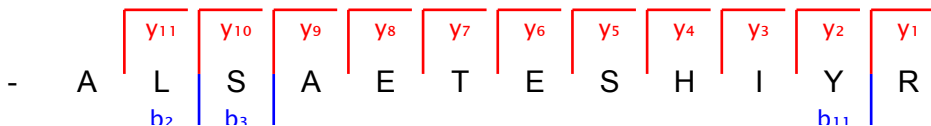

Raw file

20140918\_fract4\_dyn\_5ul\_D4\_01\_371

Scan

22016

Method

TOF; CID

Score

119.87

m/z

532.62

Gene names

SOCS3

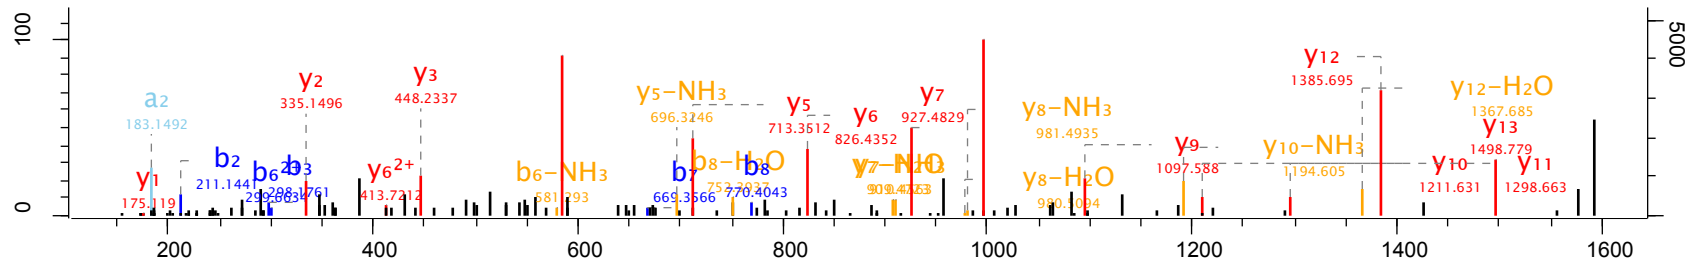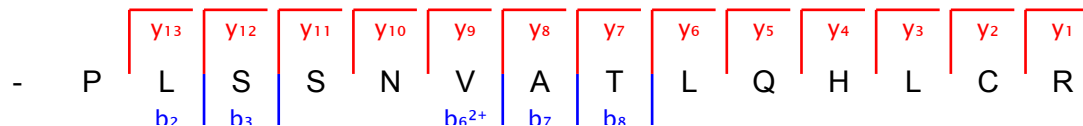

Raw file

20140918\_fract4\_dyn\_5ul\_D4\_01\_371

Scan

32344

Method

TOF; CID

Score

66.83

m/z

668.65

Gene names

PERP

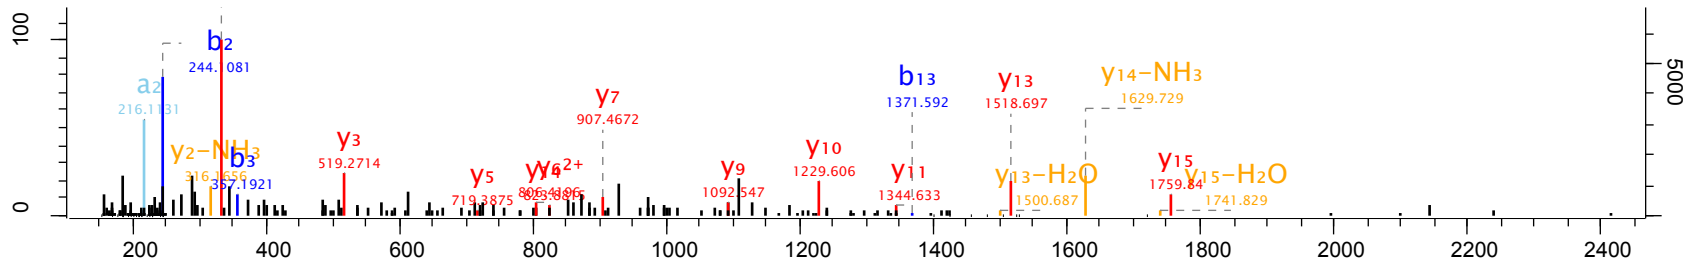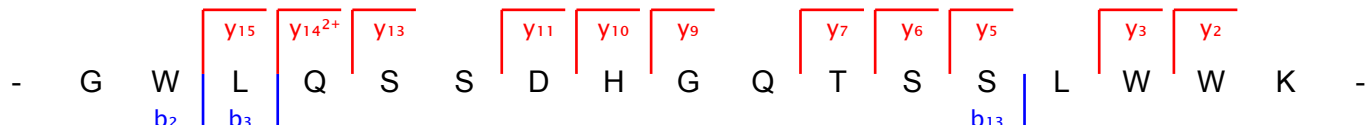

Raw file

20140918\_fract4\_dyn\_5ul\_D4\_01\_371

Scan

38454

Method

TOF; CID

Score

141.58

m/z

797.94

Gene names

CLDN12

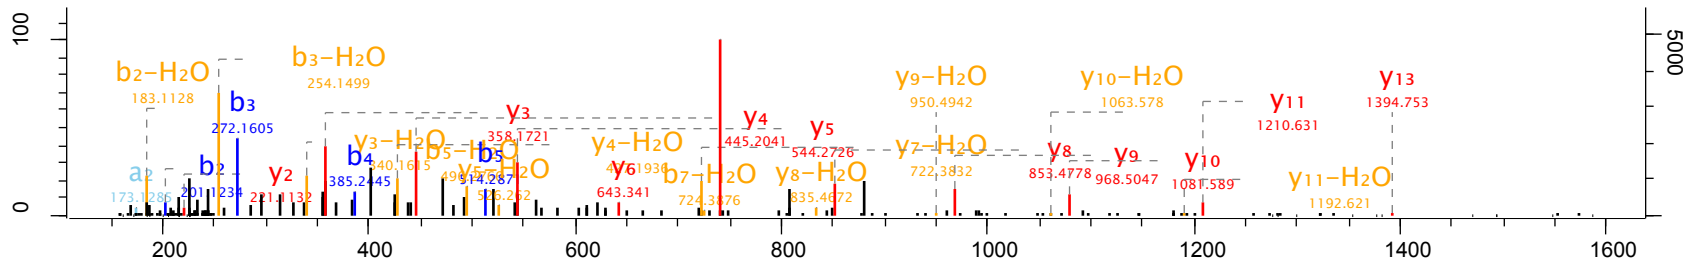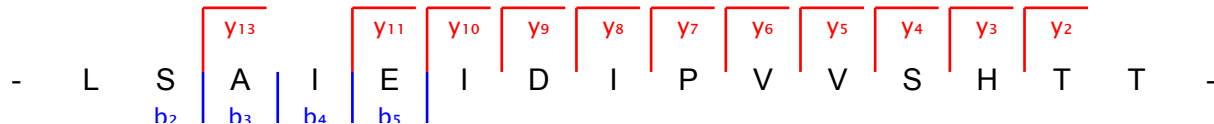

| Raw file                          | Scan  | Method   | Score | m/z    | Gene names |
|-----------------------------------|-------|----------|-------|--------|------------|
| 20140918_fract5_dyn_5ul_D5_01_372 | 14907 | TOF; CID | 94.02 | 510.62 | IFI27L2    |

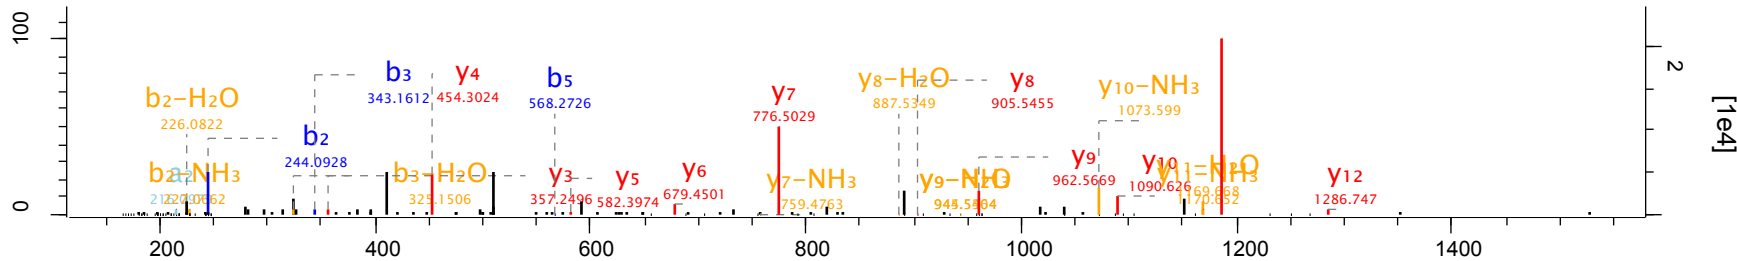

- E N V P Q G E P P K P P L K -  
 b<sub>2</sub> b<sub>3</sub> b<sub>5</sub>  
 y<sub>12</sub> y<sub>11</sub> y<sub>10</sub> y<sub>9</sub> y<sub>8</sub> y<sub>7</sub> y<sub>6</sub> y<sub>5</sub> y<sub>4</sub> y<sub>3</sub>

| Raw file                          | Scan  | Method   | Score  | m/z    | Gene names |
|-----------------------------------|-------|----------|--------|--------|------------|
| 20140918_fract5_dyn_5ul_D5_01_372 | 30562 | TOF; CID | 100.02 | 735.03 | UBALD1     |

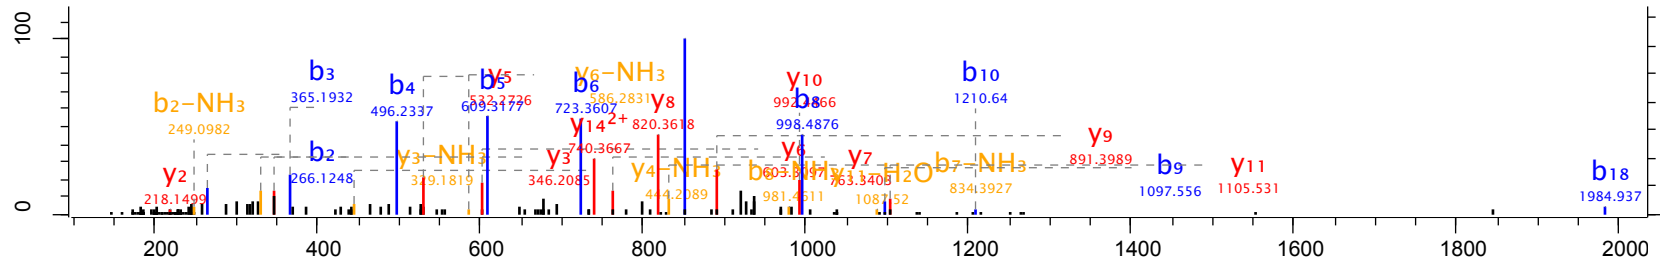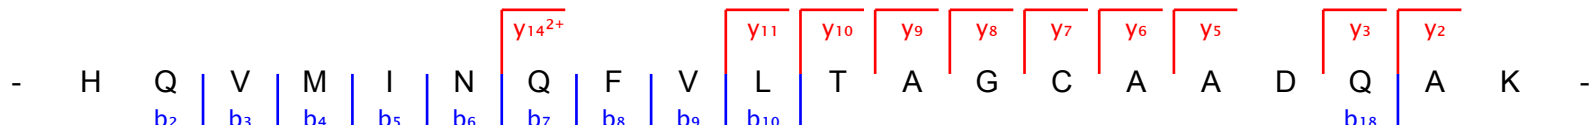

| Raw file                          | Scan  | Method   | Score | m/z    | Gene names |
|-----------------------------------|-------|----------|-------|--------|------------|
| 20140918_fract5_dyn_5ul_D5_01_372 | 33628 | TOF; CID | 64.1  | 773.43 | PIGL       |

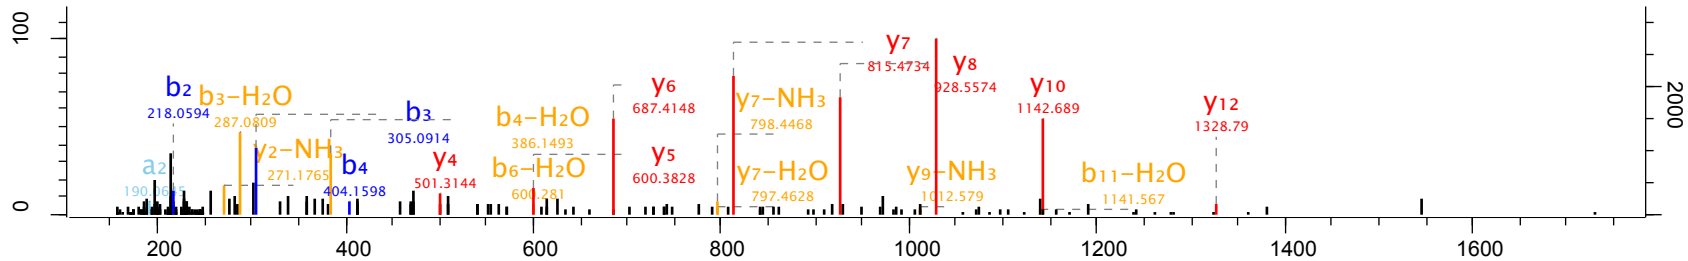

- G C S V L T L Q S V N V L R -  
 b<sub>2</sub> b<sub>3</sub> b<sub>4</sub> y<sub>12</sub> y<sub>10</sub> y<sub>9</sub> y<sub>8</sub> y<sub>7</sub> y<sub>6</sub> y<sub>5</sub> y<sub>4</sub>



| Raw file                          | Scan  | Method   | Score | m/z    | Gene names |
|-----------------------------------|-------|----------|-------|--------|------------|
| 20140918_fract5_dyn_5ul_D5_01_372 | 34434 | TOF; CID | 59.23 | 659.36 | CDC14B     |

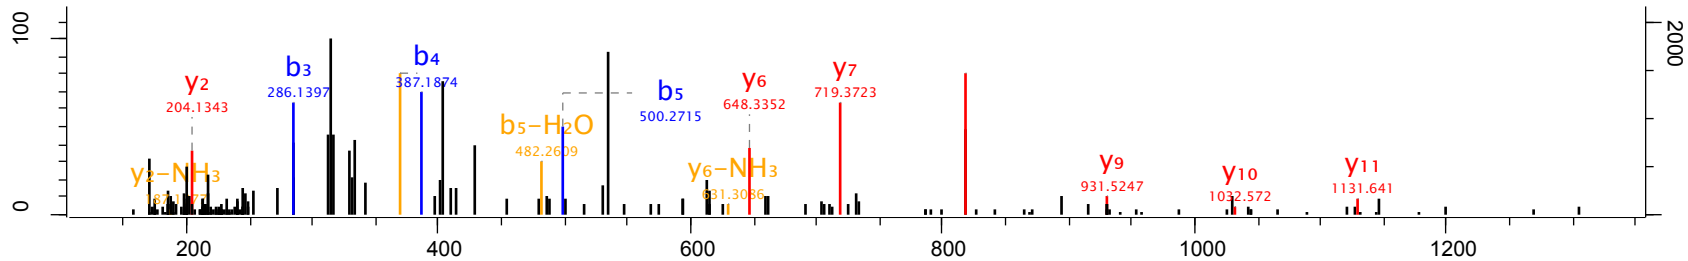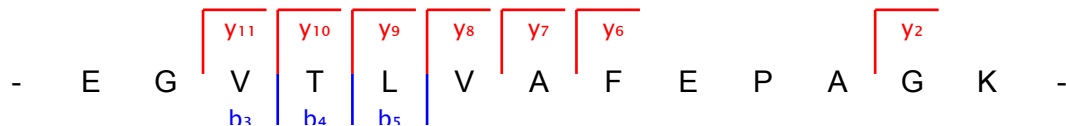

Raw file

20140918\_fract5\_dyn\_5ul\_D5\_01\_372

Scan

37423

Method

TOF; CID

Score

54.09

m/z

557.29

Gene names

IFT46

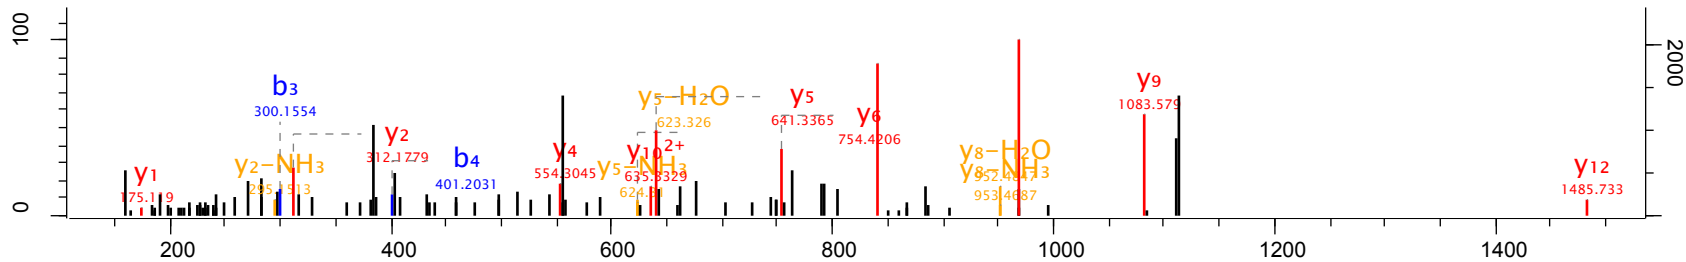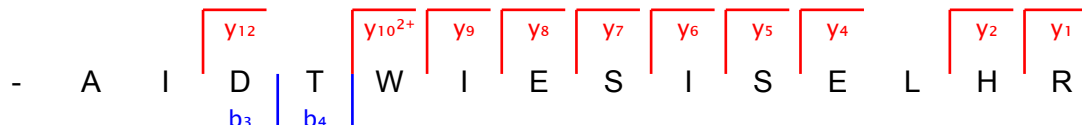

| Raw file                          | Scan | Method   | Score | m/z   | Gene names |
|-----------------------------------|------|----------|-------|-------|------------|
| 20140918_fract6_dyn_5ul_D6_01_373 | 7562 | TOF; CID | 91.07 | 566.3 | ZKSCAN4    |

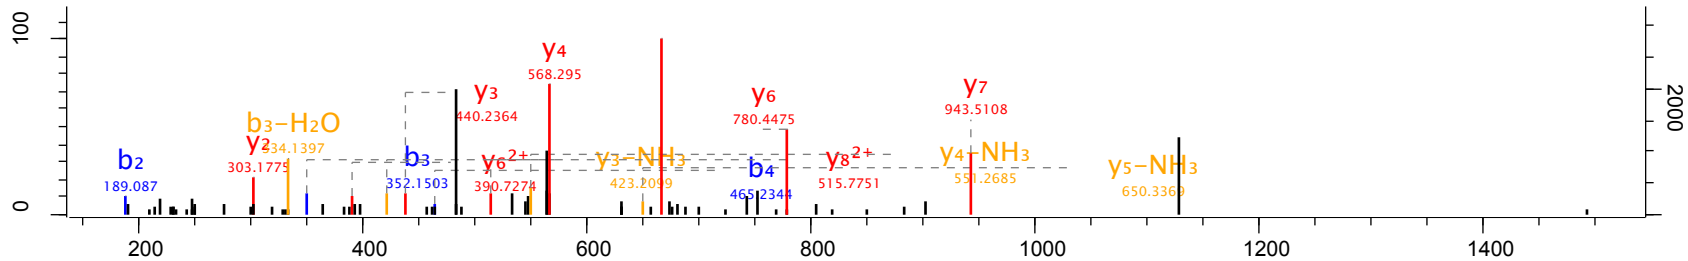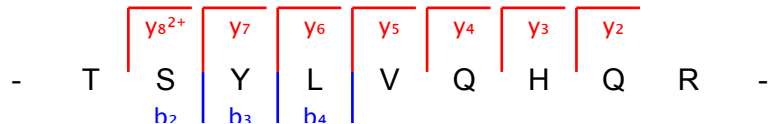

Raw file

20140918\_fract6\_dyn\_5ul\_D6\_01\_373

Scan

13691

Method

TOF; CID

Score

133.42

m/z

607.83

Gene names

SLC25A14

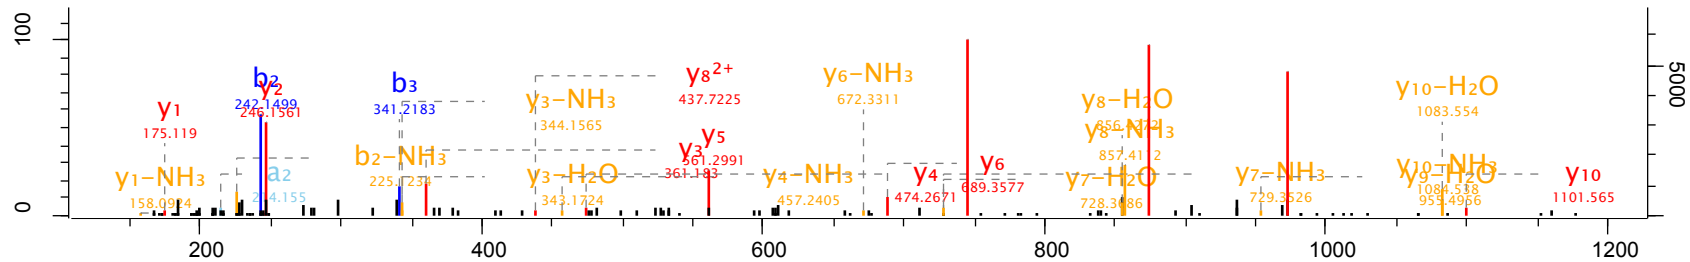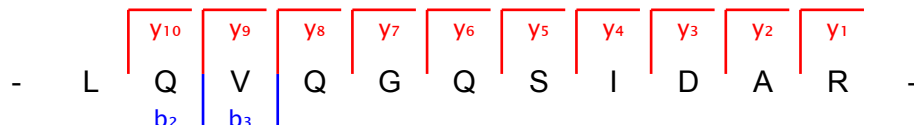

| Raw file                          | Scan  | Method   | Score | m/z     | Gene names |
|-----------------------------------|-------|----------|-------|---------|------------|
| 20140918_fract6_dyn_5ul_D6_01_373 | 21525 | TOF; CID | 54.87 | 1137.52 | MDM2       |

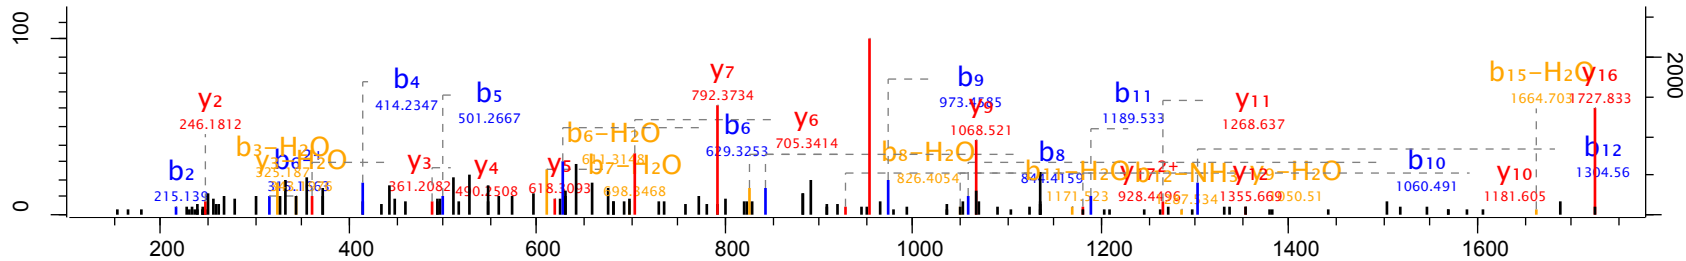

- I T Q A S Q S Q E S E D Y S Q P S T S S S  
 b<sub>2</sub> | b<sub>4</sub> | b<sub>5</sub> | b<sub>6</sub> | b<sub>8</sub> | b<sub>9</sub> | b<sub>10</sub> | b<sub>11</sub> | b<sub>12</sub>  
 y<sub>17</sub><sup>2+</sup> | y<sub>16</sub> | y<sub>12</sub> | y<sub>11</sub>

Raw file

20140918\_fract6\_dyn\_5ul\_D6\_01\_373

Scan

22016

Method

TOF; CID

Score

102.52

m/z

548.28

Gene names

SOCS2

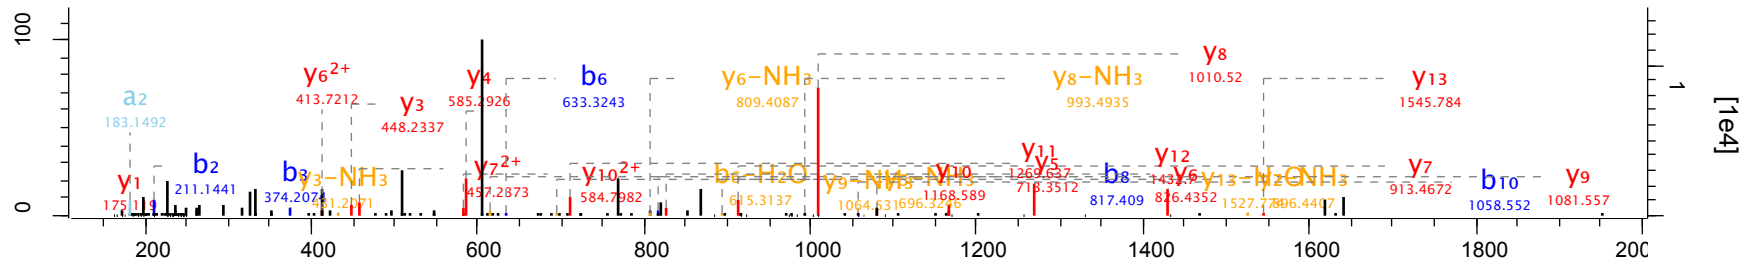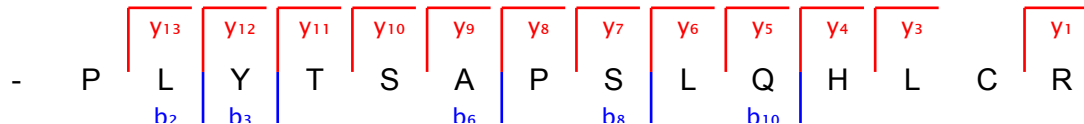

| Raw file                          | Scan  | Method   | Score | m/z    | Gene names |
|-----------------------------------|-------|----------|-------|--------|------------|
| 20140918_fract6_dyn_5ul_D6_01_373 | 22980 | TOF; CID | 93.16 | 499.31 | ZBTB26     |

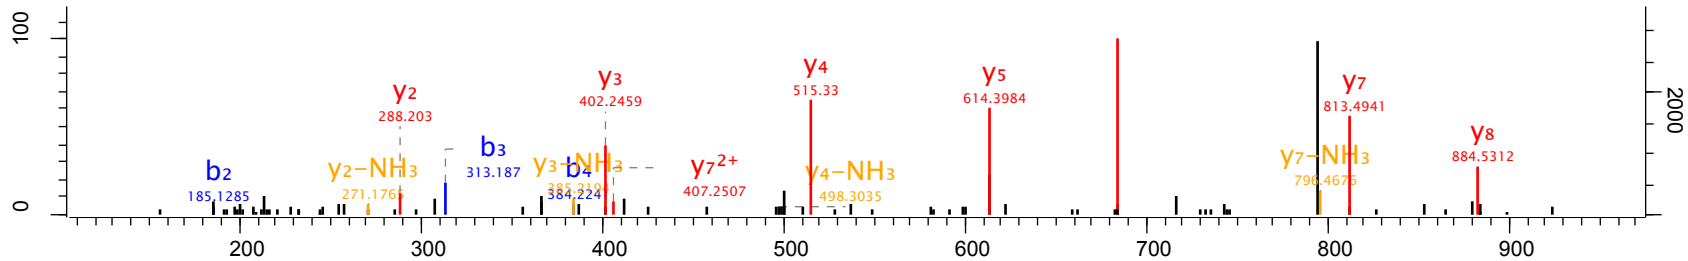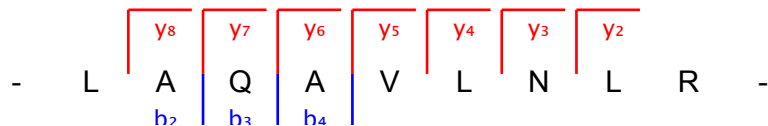

| Raw file                          | Scan  | Method   | Score | m/z    | Gene names |
|-----------------------------------|-------|----------|-------|--------|------------|
| 20140918_fract7_dyn_5ul_D7_01_393 | 19337 | TOF; CID | 73.93 | 799.01 | PGAP3      |

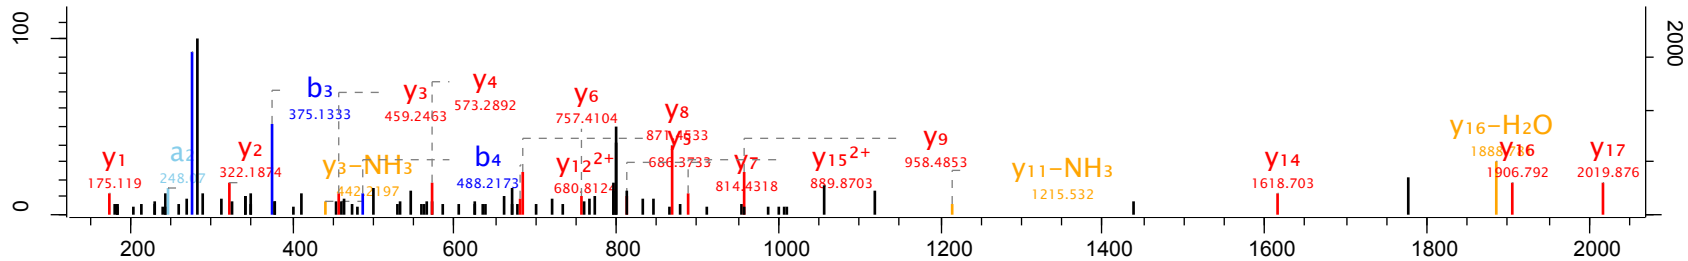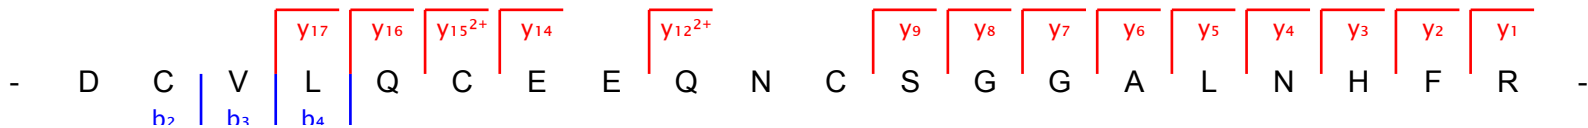



Raw file

20140918\_fract7\_dyn\_5ul\_D7\_01\_393

Scan

26476

Method

TOF; CID

Score

100.45

m/z

946.97

Gene names

PAGE1

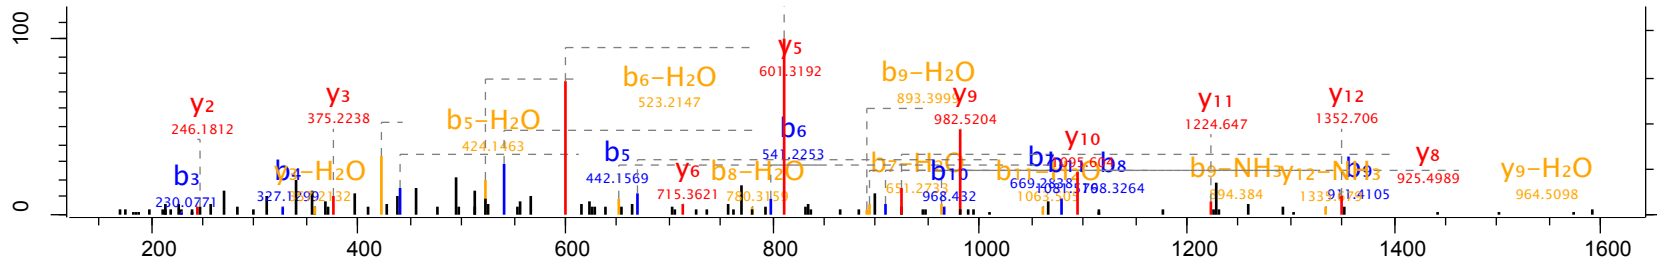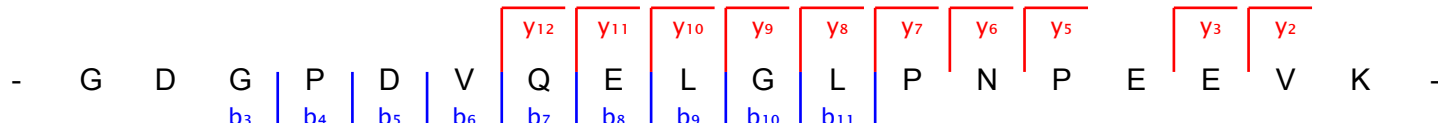

Raw file

20140918\_fract8\_dyn\_5ul\_D8\_01\_394

Scan

17254

Method

TOF; CID

Score

90.15

m/z

517.27

Gene names

CGRRF1

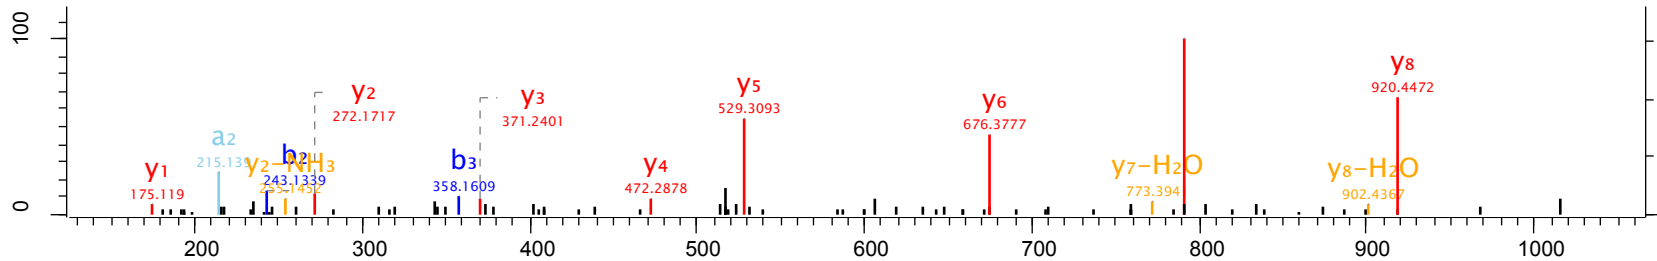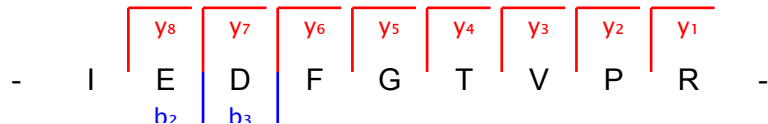

Raw file

20140918\_fract8\_dyn\_5ul\_D8\_01\_394

Scan

23593

Method

TOF; CID

Score

76.28

m/z

595.28

Gene names

RPS3

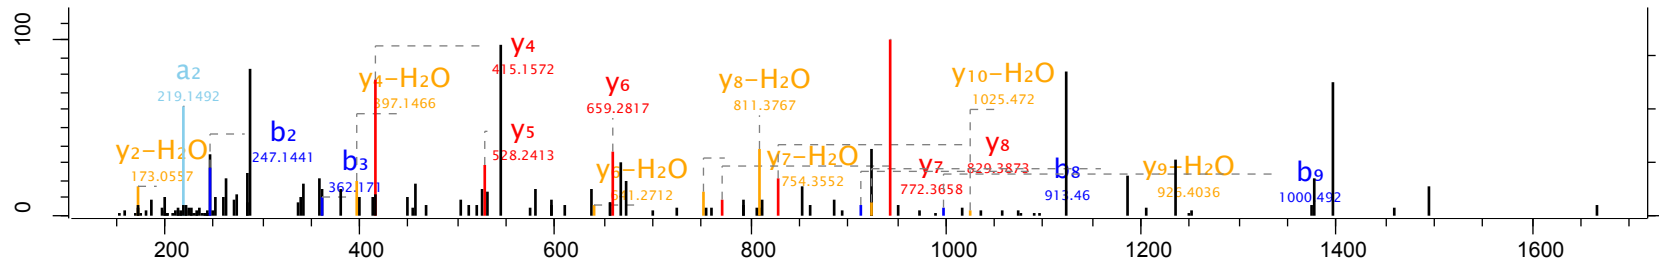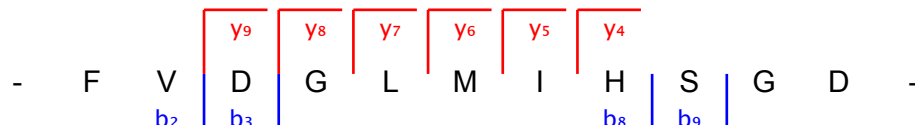

| Raw file                          | Scan  | Method   | Score  | m/z    | Gene names |
|-----------------------------------|-------|----------|--------|--------|------------|
| 20140918_fract9_dyn_5ul_E1_01_377 | 14012 | TOF; CID | 110.38 | 600.83 | SPATA24    |

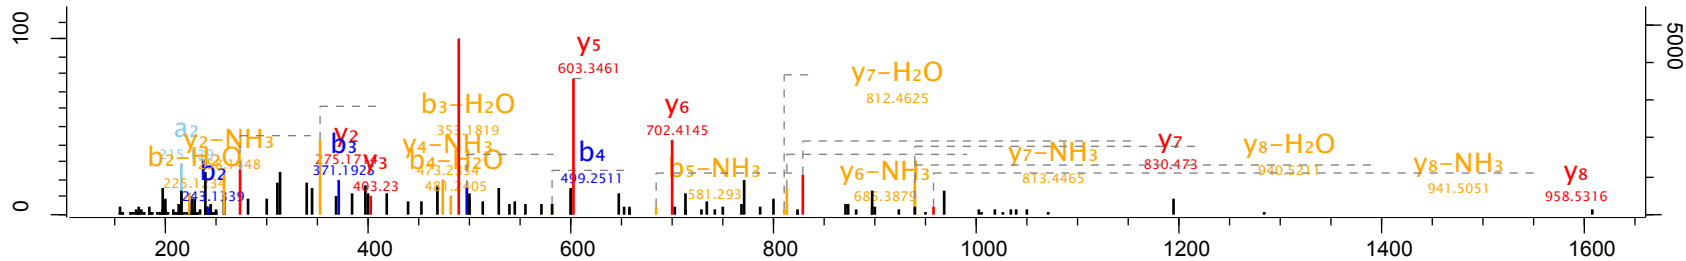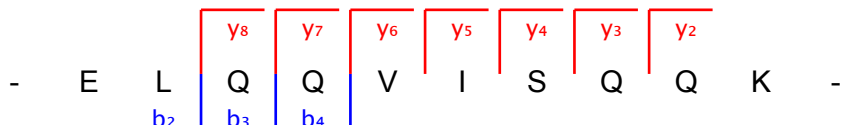

Raw file

20140918\_fract9\_dyn\_5ul\_E1\_01\_377

Scan

15473

Method

TOF; CID

Score

41.91

m/z

599.55

Gene names

COL16A1

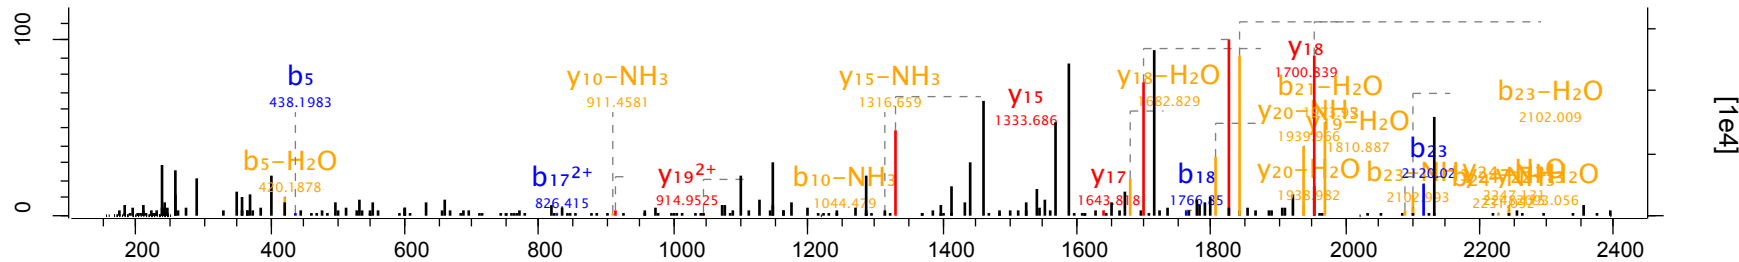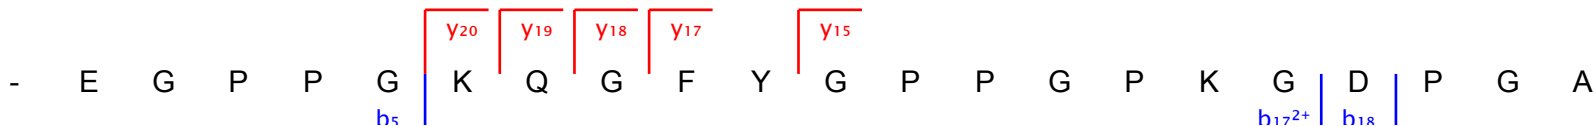

Raw file

Scan

Method

Score

m/z

Gene names

20140918\_fract9\_dyn\_5ul\_E1\_01\_377

21888

TOF; CID

72.29

698.36

TRAIP

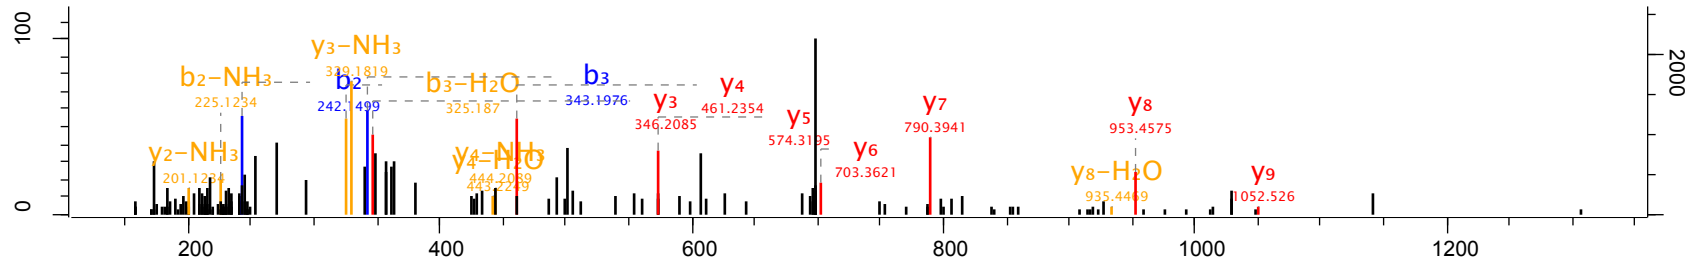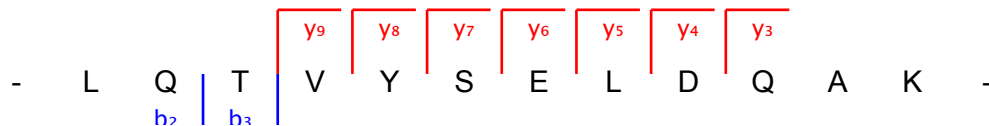

| Raw file                          | Scan  | Method   | Score | m/z   | Gene names |
|-----------------------------------|-------|----------|-------|-------|------------|
| 20140918_fract9_dyn_5ul_E1_01_377 | 29824 | TOF; CID | 59.23 | 827.4 | SYCP1      |

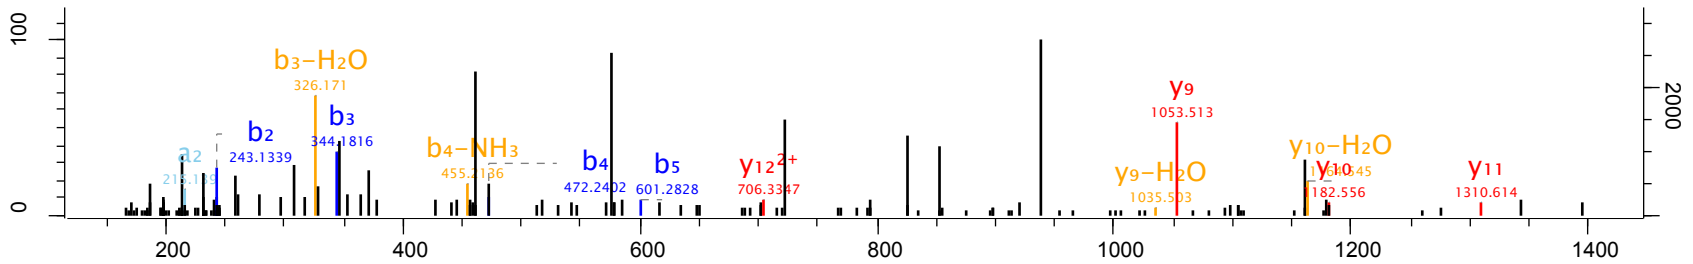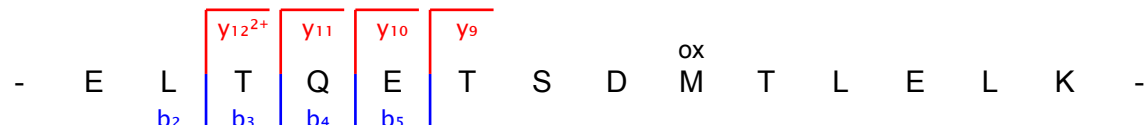

Raw file

20140918\_fract9\_dyn\_5ul\_E1\_01\_377

Scan

29965

Method

TOF; CID

Score

121.44

m/z

765.37

Gene names

CNIH4

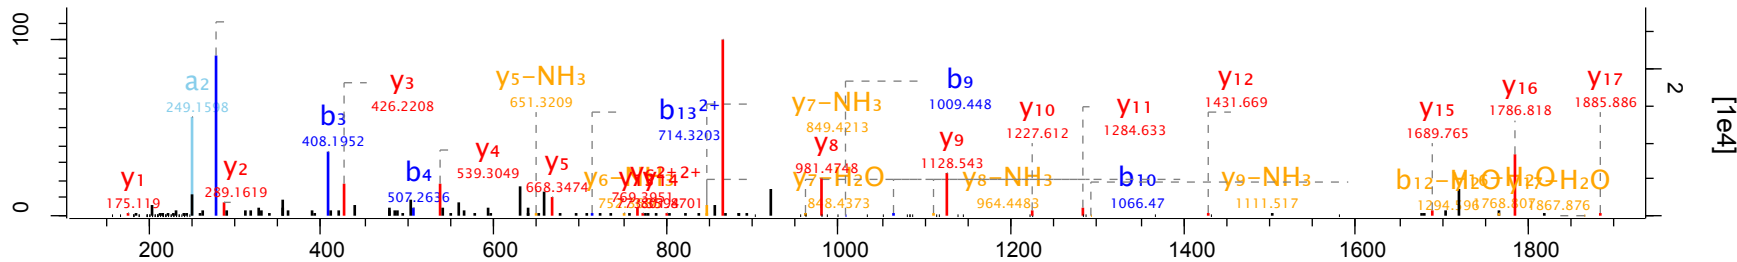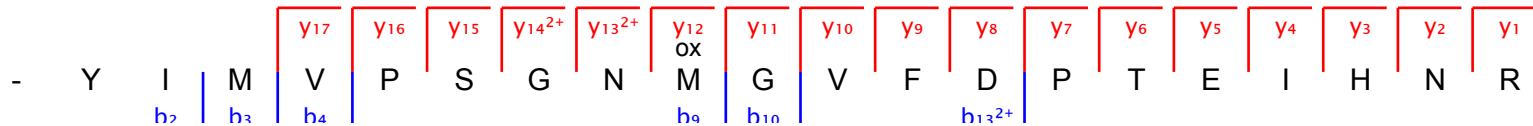



Raw file

20140918\_fract9\_dyn\_5ul\_E1\_01\_377

Scan

38027

Method

TOF; CID

Score

61.13

m/z

673.02

Gene names

PLAGL2

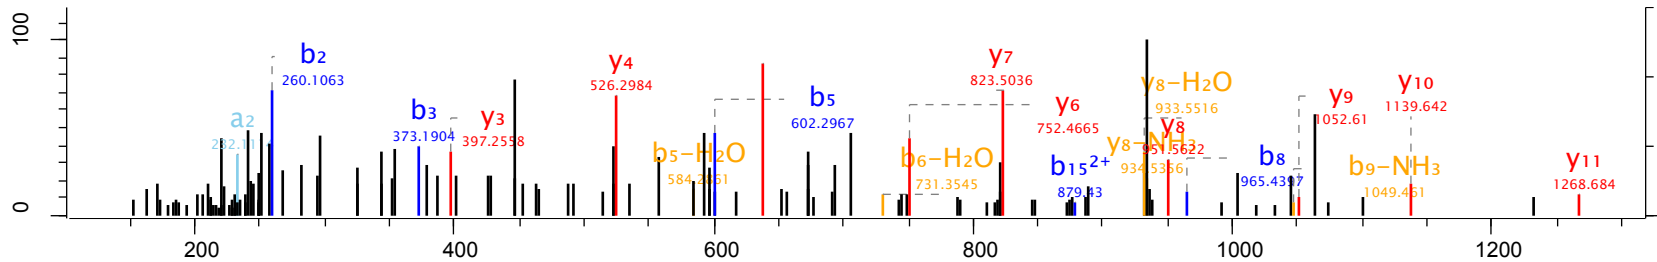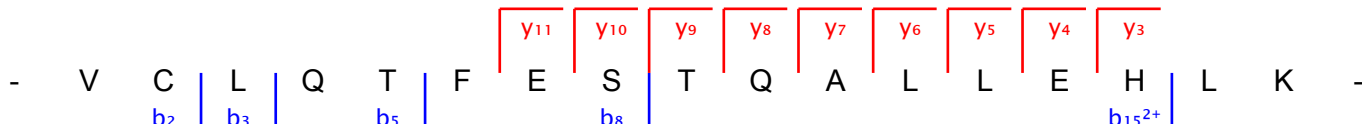

Raw file

20140918\_fract10\_dyn\_5ul\_E2\_01\_378

Scan

6158

Method

TOF; CID

Score

75.32

m/z

465.23

Gene names

CRAT

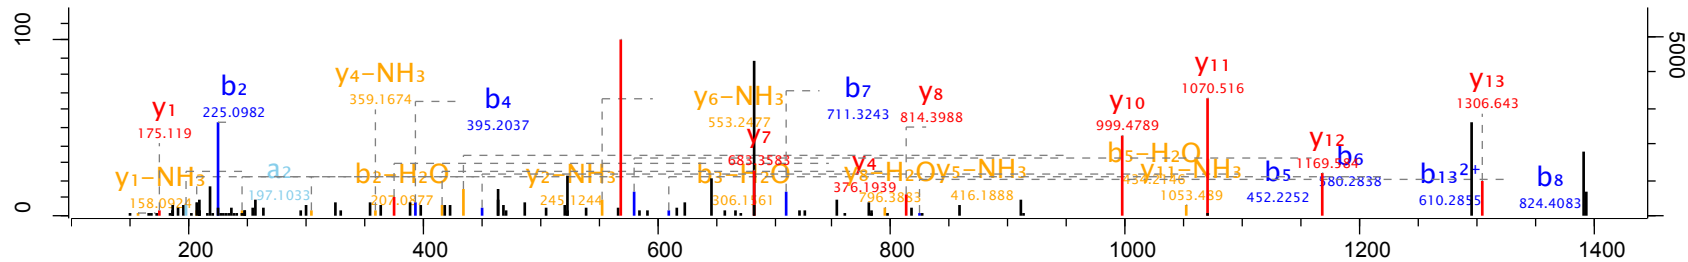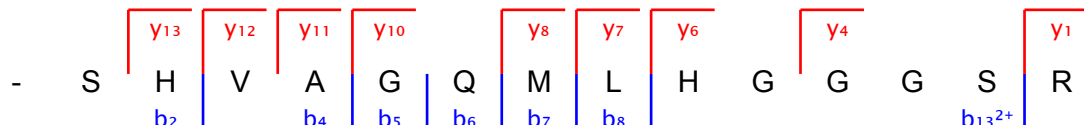

| Raw file                           | Scan  | Method   | Score  | m/z    | Gene names |
|------------------------------------|-------|----------|--------|--------|------------|
| 20140918_fract10_dyn_5ul_E2_01_378 | 10459 | TOF; CID | 125.74 | 545.32 | PRICKLE2   |

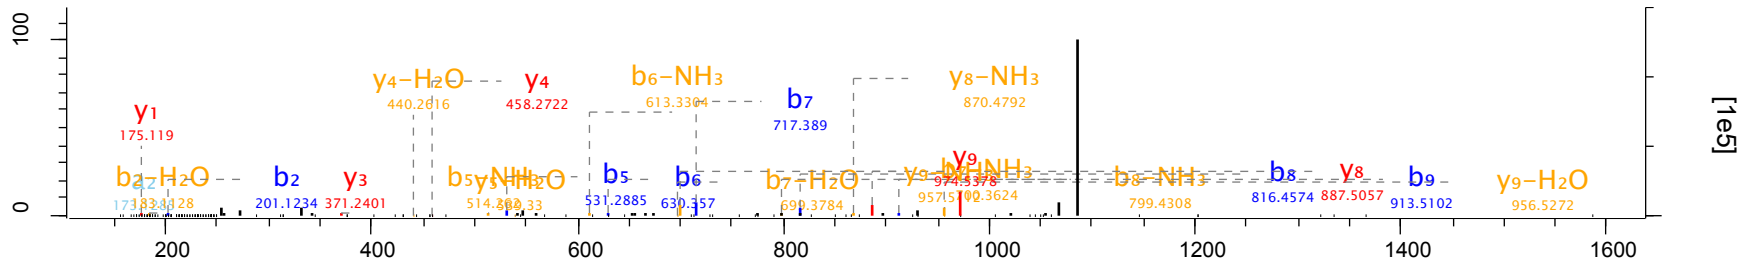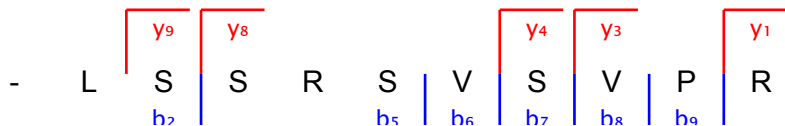

Raw file

20140918\_fract10\_dyn\_5ul\_E2\_01\_378

Scan

26649

Method

TOF; CID

Score

43.33

m/z

979.49

Gene names

OSBPL8

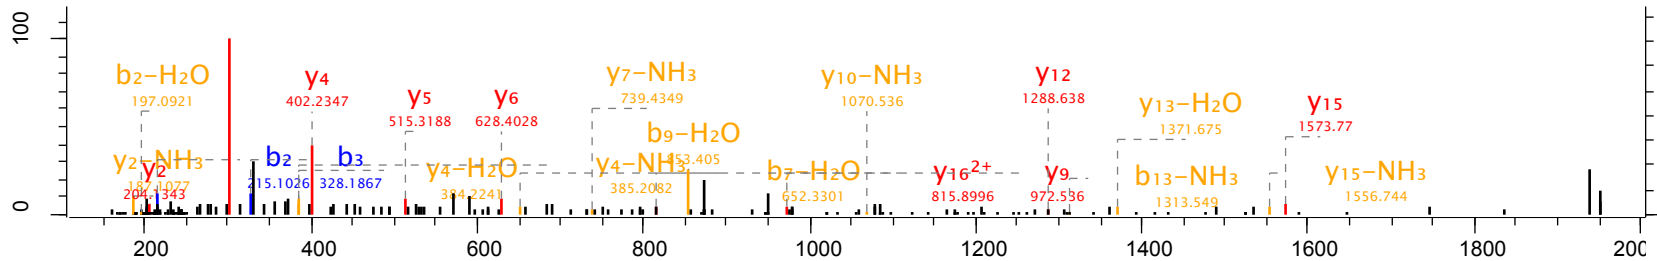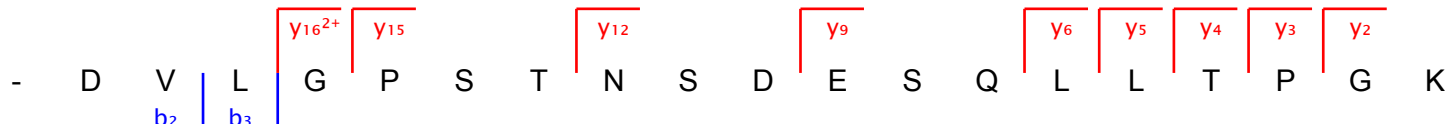

Raw file

20140918\_fract10\_dyn\_5ul\_E2\_01\_378

Scan

30767

Method

TOF; CID

Score

120.9

m/z

865.99

Gene names

KRTCAP2

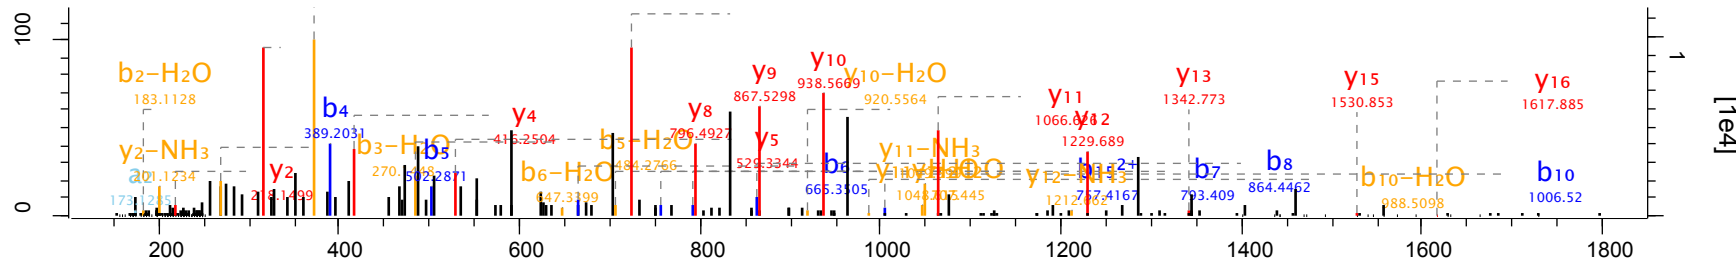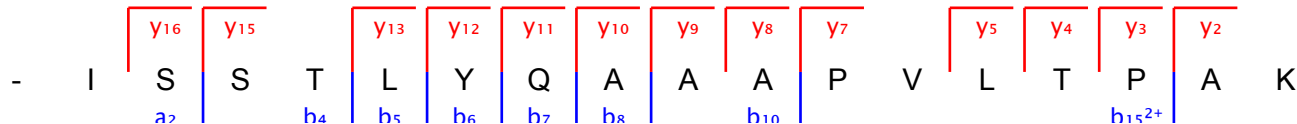

| Raw file                           | Scan  | Method   | Score  | m/z    | Gene names |
|------------------------------------|-------|----------|--------|--------|------------|
| 20140918_fract10_dyn_5ul_E2_01_378 | 34653 | TOF; CID | 137.89 | 814.92 | CCDC167    |

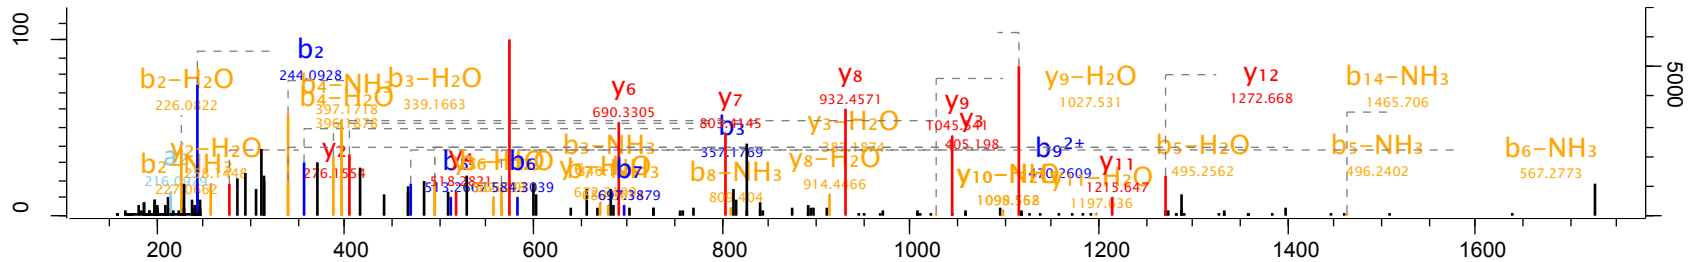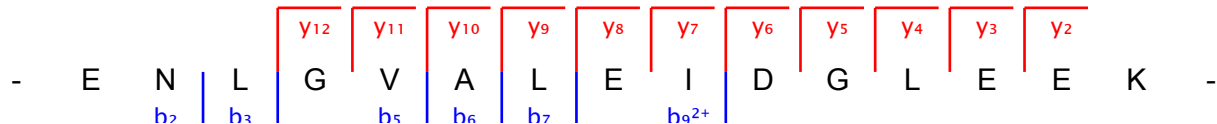

Raw file

Scan

Method

Score

m/z

Gene names

20140918\_fract11\_dyn\_5ul\_E3\_01\_379

9894

TOF; CID

74.53

368.21

SPATA24

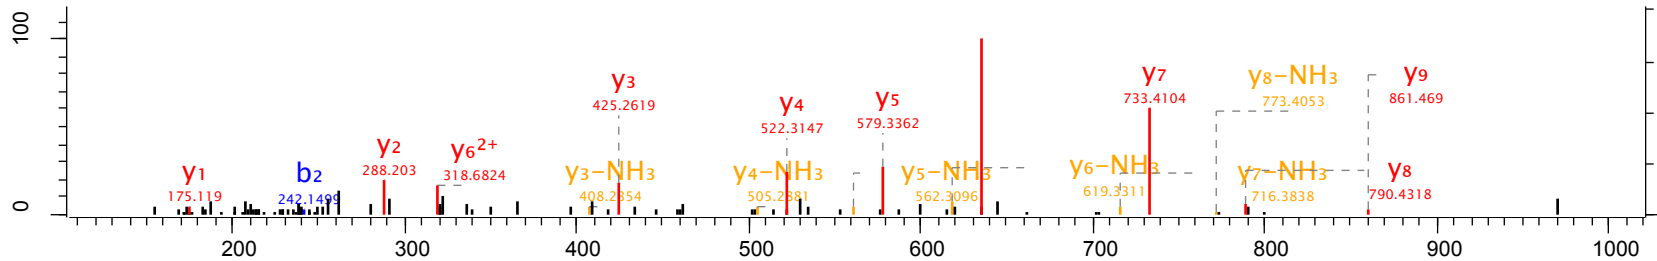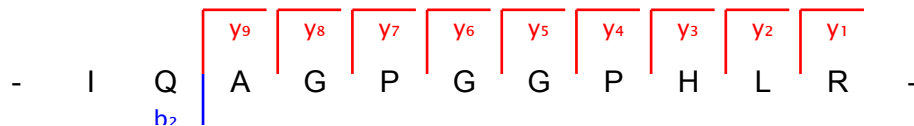

| Raw file                           | Scan  | Method   | Score | m/z    | Gene names |
|------------------------------------|-------|----------|-------|--------|------------|
| 20140918_fract11_dyn_5ul_E3_01_379 | 20243 | TOF; CID | 61.41 | 513.28 | MYEOV2     |

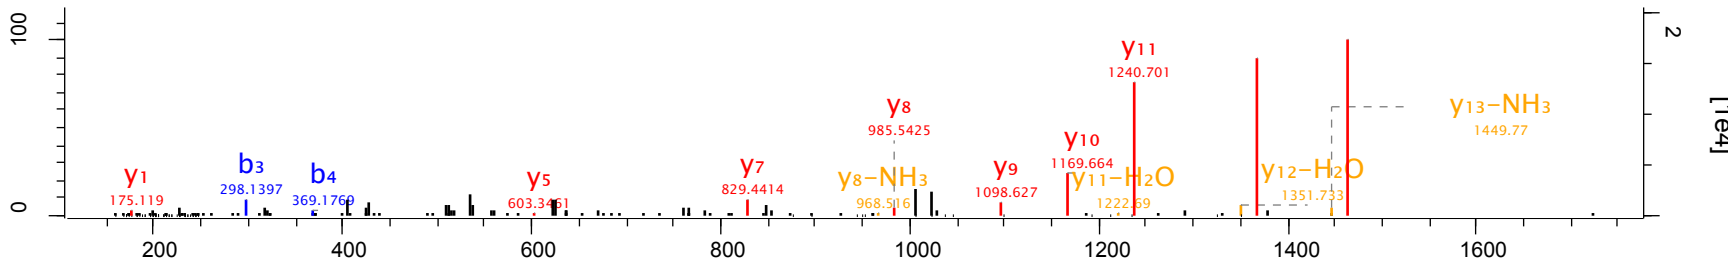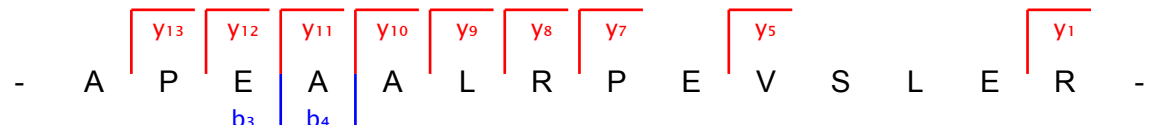



Raw file  
 20140918\_fract11\_dyn\_5ul\_E3\_01\_379

| Scan  | Method   | Score | m/z    | Gene names |
|-------|----------|-------|--------|------------|
| 24909 | TOF; CID | 83.82 | 857.86 | MT-ND3     |

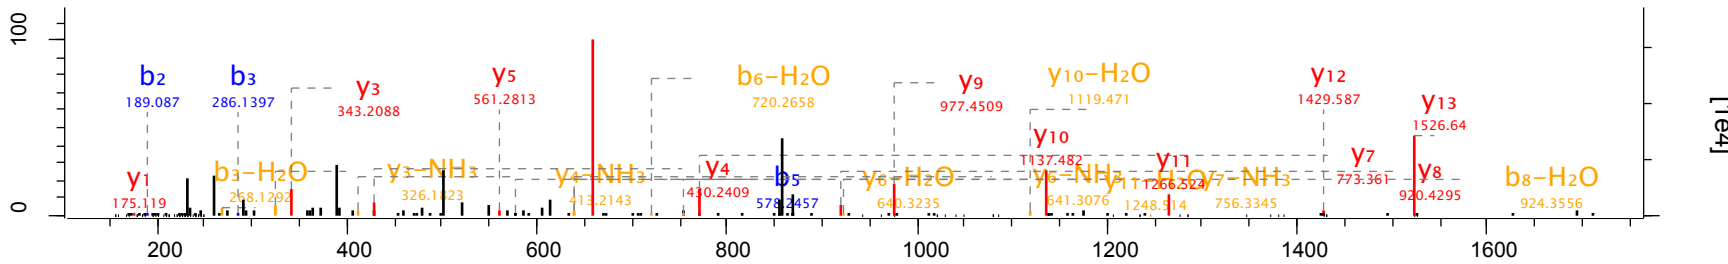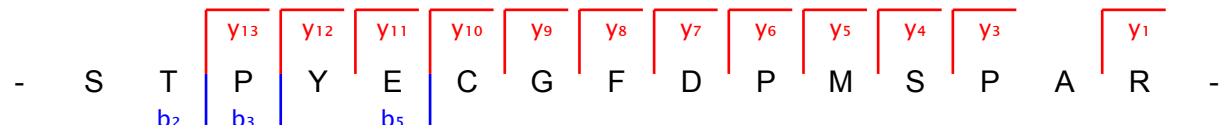

Raw file

20140918\_fract11\_dyn\_5ul\_E3\_01\_379

Scan

32811

Method

TOF; CID

Score

69.72

m/z

493.28

Gene names

TOR1AIP2

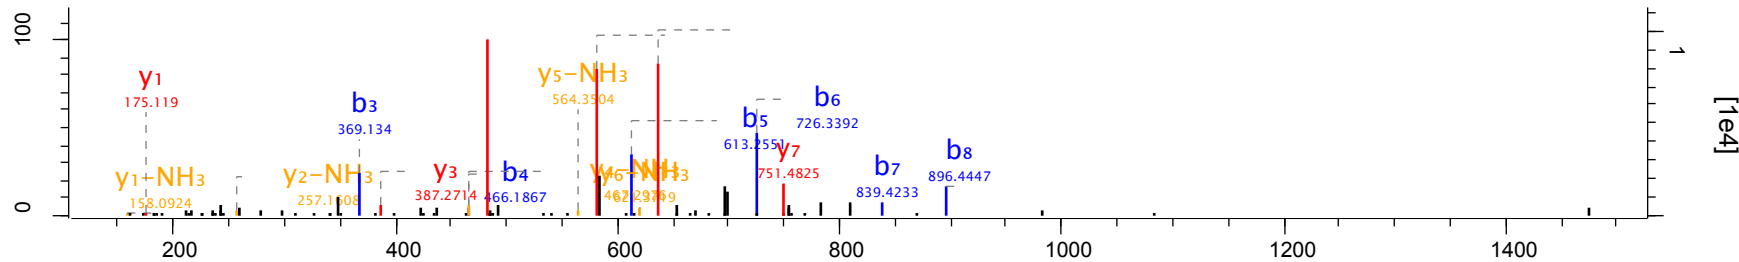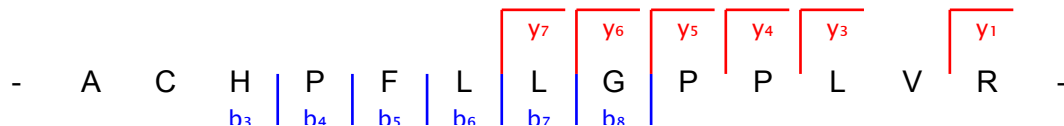

| Raw file                           | Scan  | Method   | Score  | m/z    | Gene names |
|------------------------------------|-------|----------|--------|--------|------------|
| 20140918_fract11_dyn_5ul_E3_01_379 | 36638 | TOF; CID | 139.88 | 560.32 | KDEL3      |

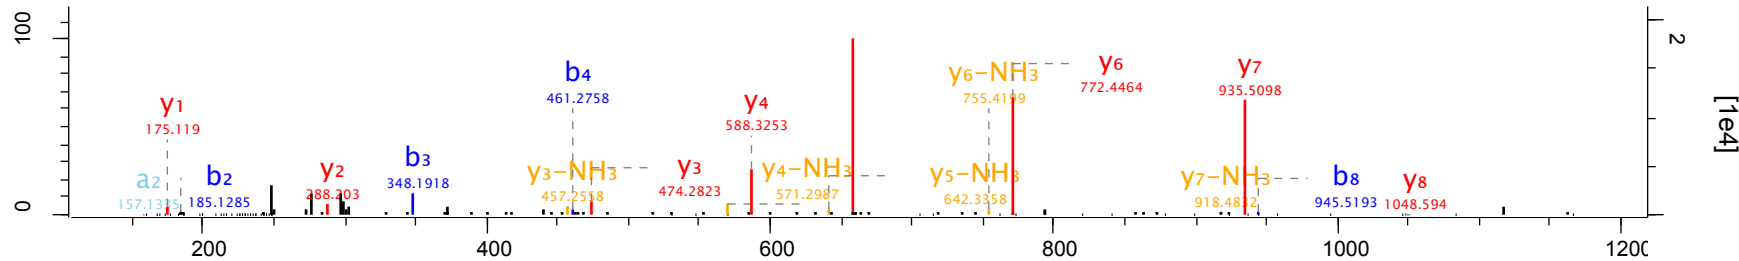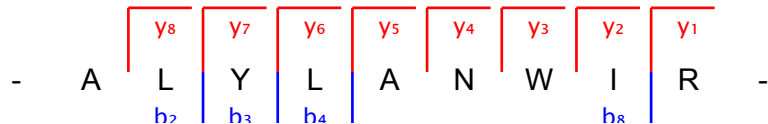

Raw file

20140918\_fract12\_dyn\_5ul\_E4\_01\_380

Scan

6672

Method

TOF; CID

Score

87.64

m/z

499.22

Gene names

ZNF580

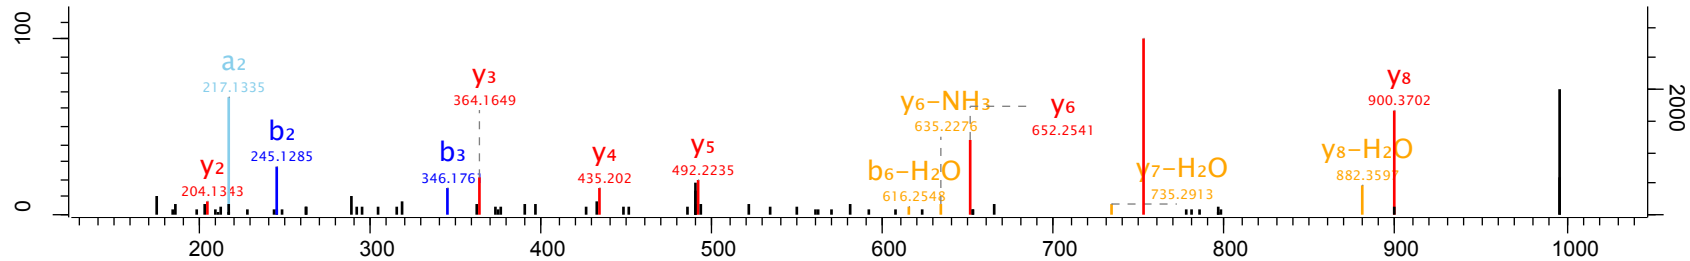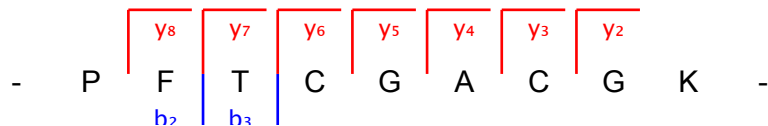

| Raw file                           | Scan  | Method   | Score | m/z    | Gene names |
|------------------------------------|-------|----------|-------|--------|------------|
| 20140918_fract12_dyn_5ul_E4_01_380 | 11045 | TOF; CID | 64.22 | 705.87 | SAMD10     |

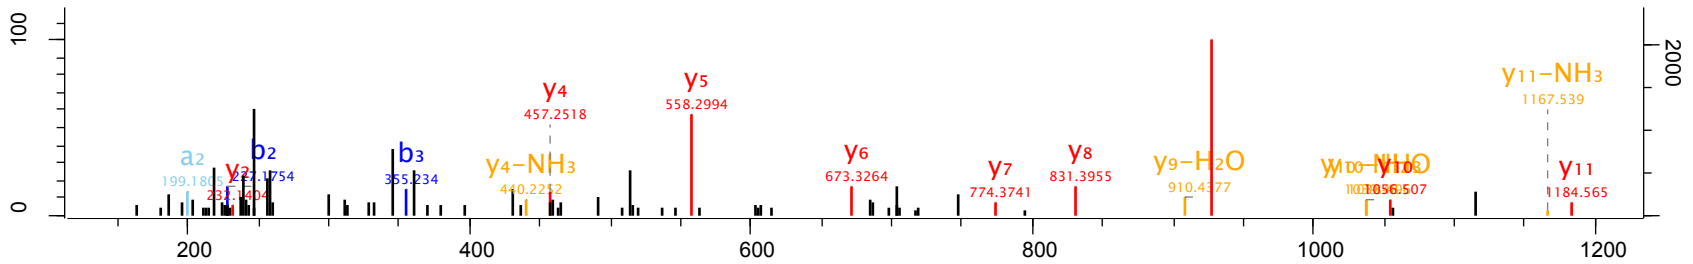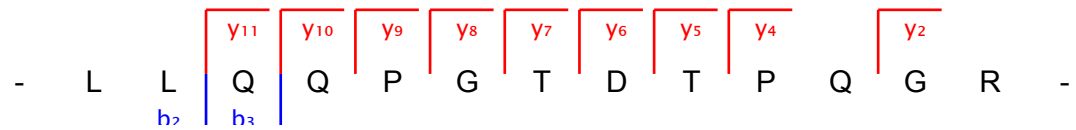

| Raw file                           | Scan  | Method   | Score | m/z    | Gene names |
|------------------------------------|-------|----------|-------|--------|------------|
| 20140918_fract12_dyn_5ul_E4_01_380 | 21996 | TOF; CID | 89.35 | 524.25 | BTN2A2     |

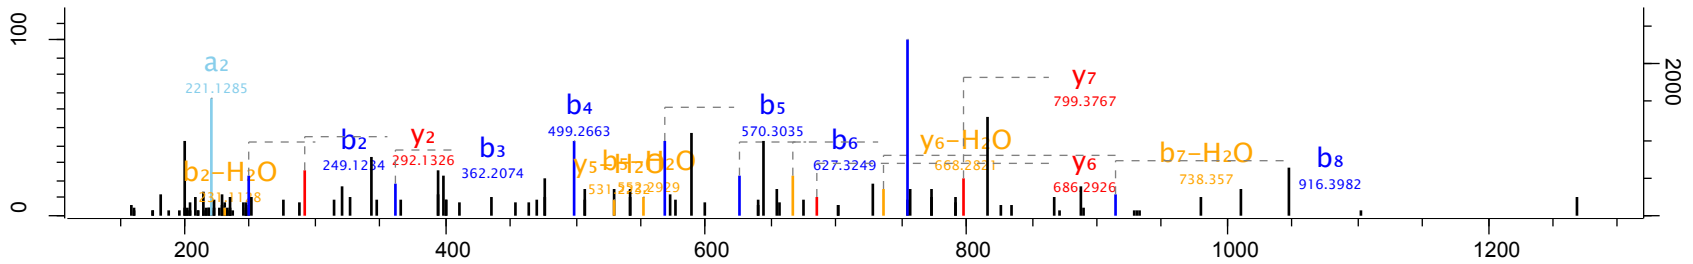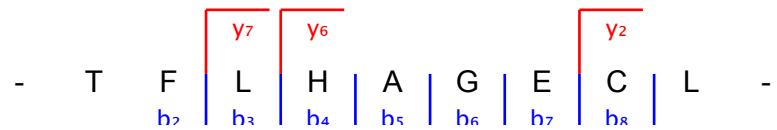

Raw file

20140918\_fract12\_dyn\_5ul\_E4\_01\_380

Scan

26404

Method

TOF; CID

Score

90.79

m/z

486.95

Gene names

TIGD1

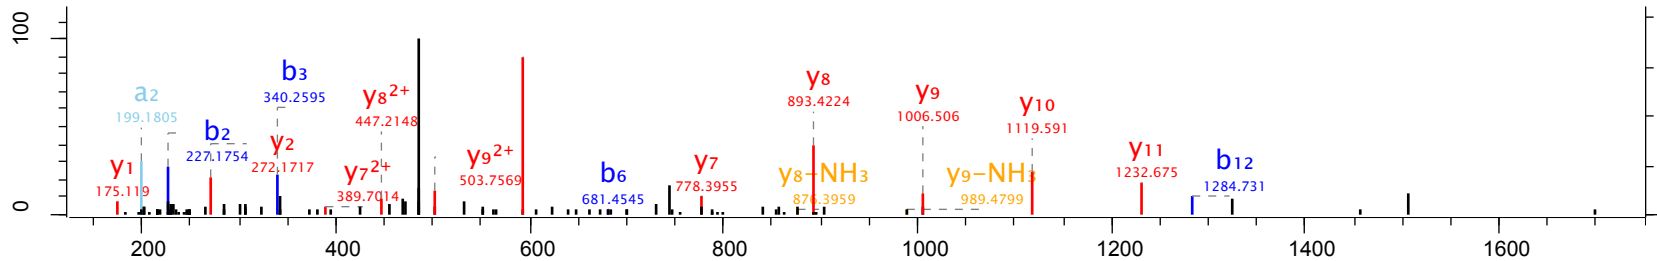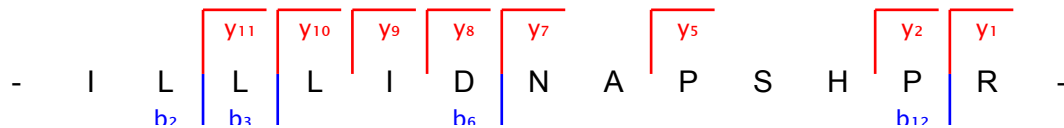

Raw file

20140918\_fract13\_dyn\_5ul\_E5\_01\_381

Scan

22797

Method

TOF; CID

Score

63.49

m/z

972.43

Gene names

LYPD3

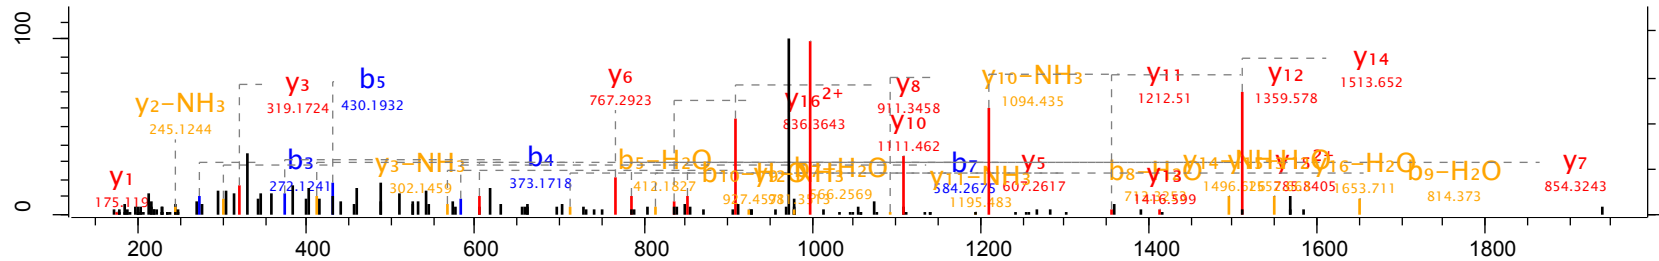

- D G V T G P G F T L S G S C C Q G S R -

$y_{16}^{2+}$   $y_{15}^{2+}$   $y_{14}$   $y_{13}$   $y_{12}$   $y_{11}$   $y_{10}$   $y_9$   $y_8$   $y_7$   $y_6$   $y_5$   $y_3$   $y_1$   
 $b_3$   $b_4$   $b_5$   $b_7$



Raw file

20140918\_fract13\_dyn\_5ul\_E5\_01\_381

Scan

27792

Method

TOF; CID

Score

73.08

m/z

580.31

Gene names

GADD45A

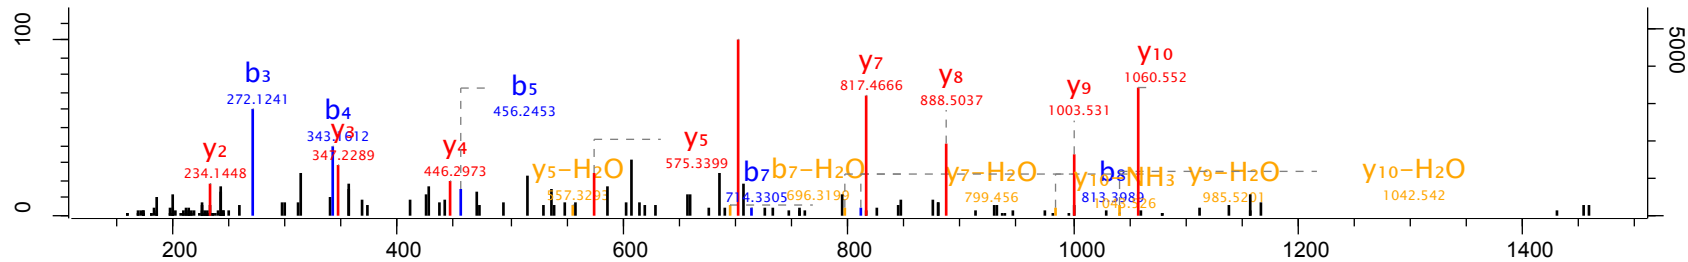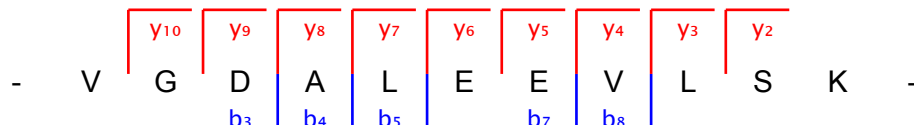

| Raw file                           | Scan  | Method   | Score | m/z    | Gene names |
|------------------------------------|-------|----------|-------|--------|------------|
| 20140918_fract13_dyn_5ul_E5_01_381 | 33194 | TOF; CID | 74.99 | 745.38 | PPARGC1B   |

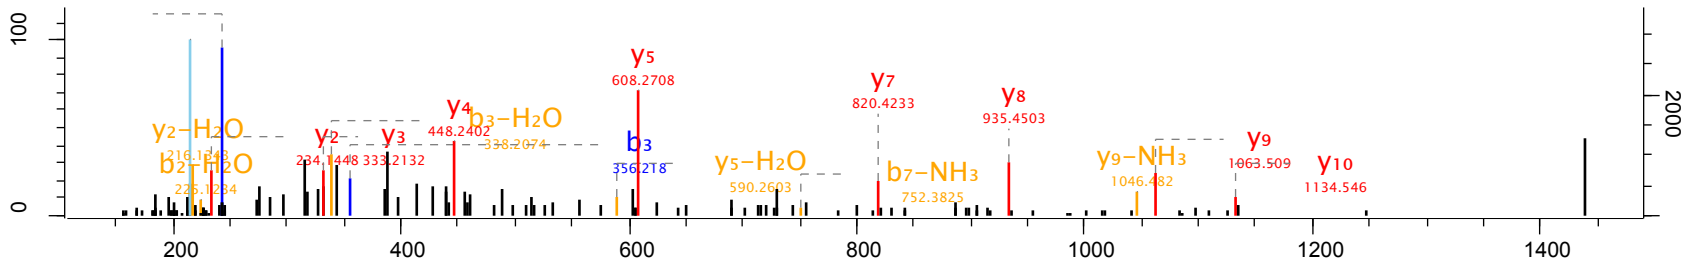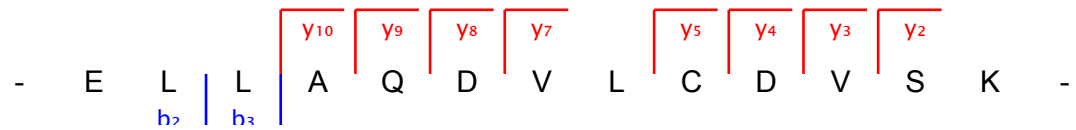

| Raw file                           | Scan  | Method   | Score  | m/z    | Gene names |
|------------------------------------|-------|----------|--------|--------|------------|
| 20140918_fract14_dyn_5ul_E6_01_382 | 13466 | TOF; CID | 103.69 | 430.92 | DPY19L3    |

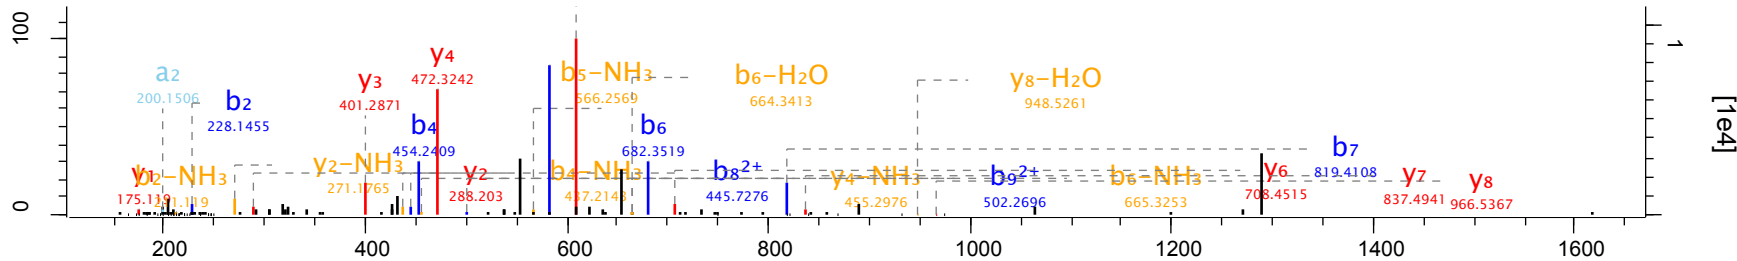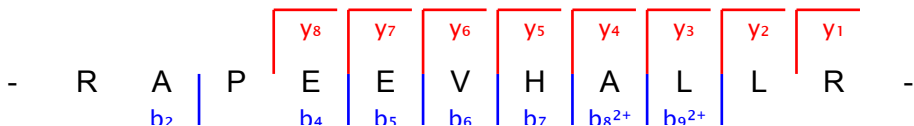

Raw file

20140918\_fract14\_dyn\_5ul\_E6\_01\_382

Scan

20987

Method

TOF; CID

Score

69.72

m/z

588.31

Gene names

ZDHHC14

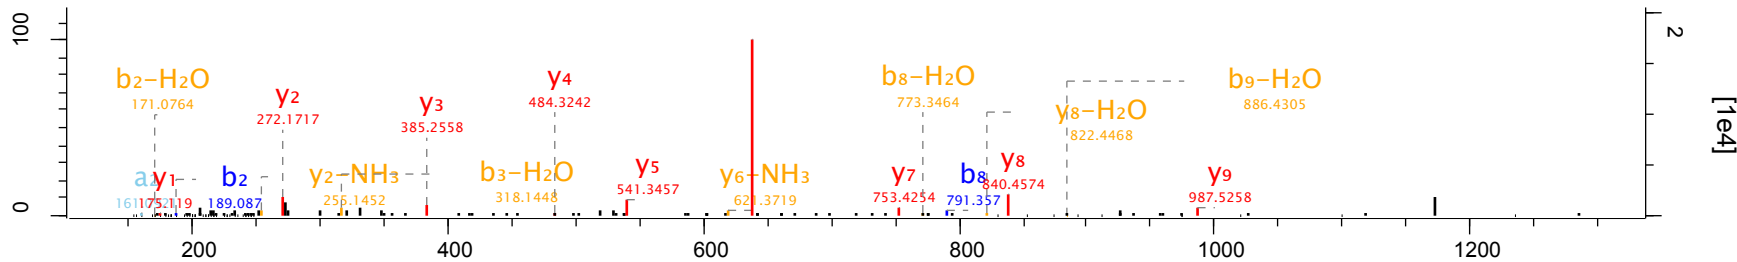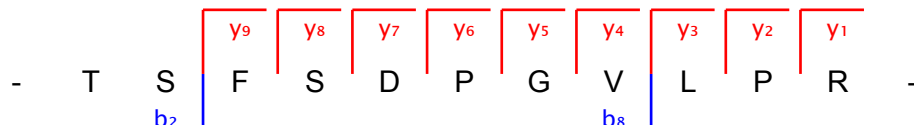

Raw file

20140918\_fract14\_dyn\_5ul\_E6\_01\_382

Scan

25573

Method

TOF; CID

Score

163.45

m/z

929.48

Gene names

HIATL1

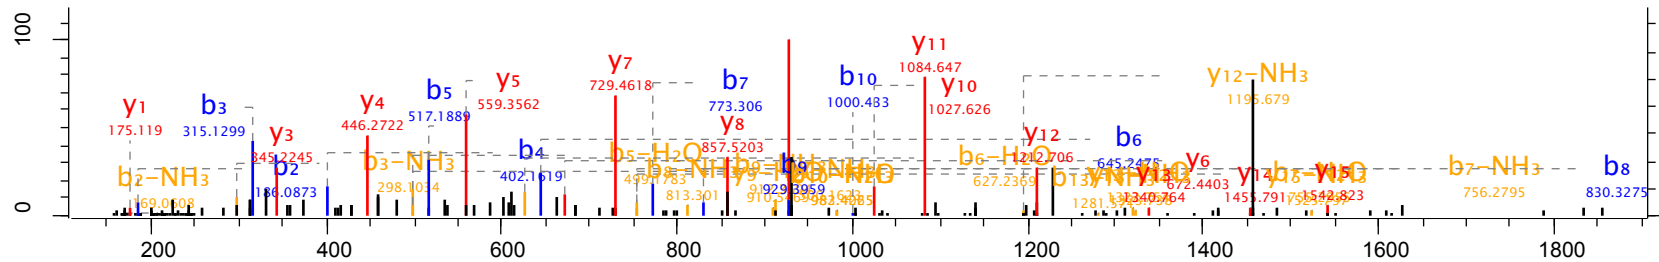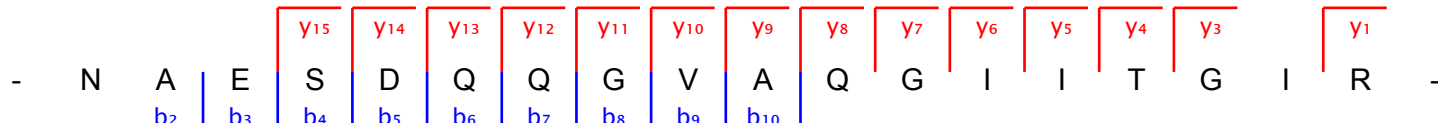

Raw file

20140918\_fract14\_dyn\_5ul\_E6\_01\_382

Scan

34095

Method

TOF; CID

Score

37.88

m/z

730.02

Gene names

PTPRH

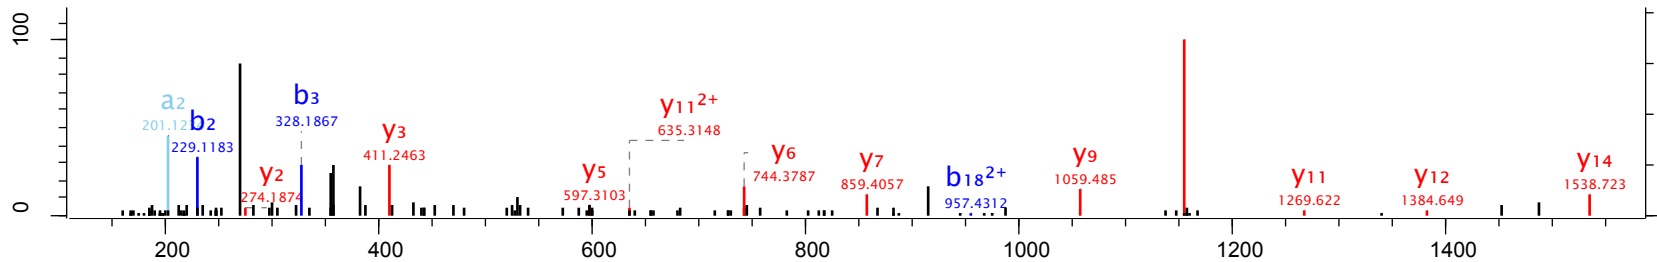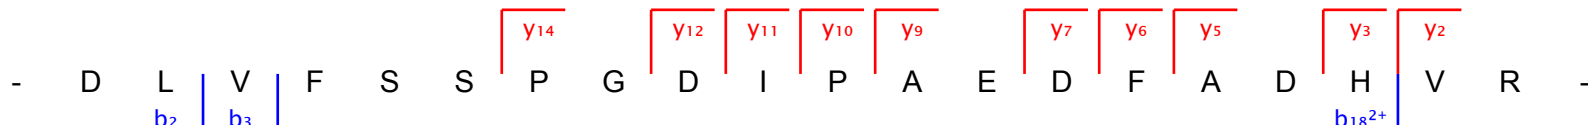

Raw file

20140918\_fract14\_dyn\_5ul\_E6\_01\_382

Scan

38899

Method

TOF; CID

Score

73.07

m/z

907.8

Gene names

HIGD2A

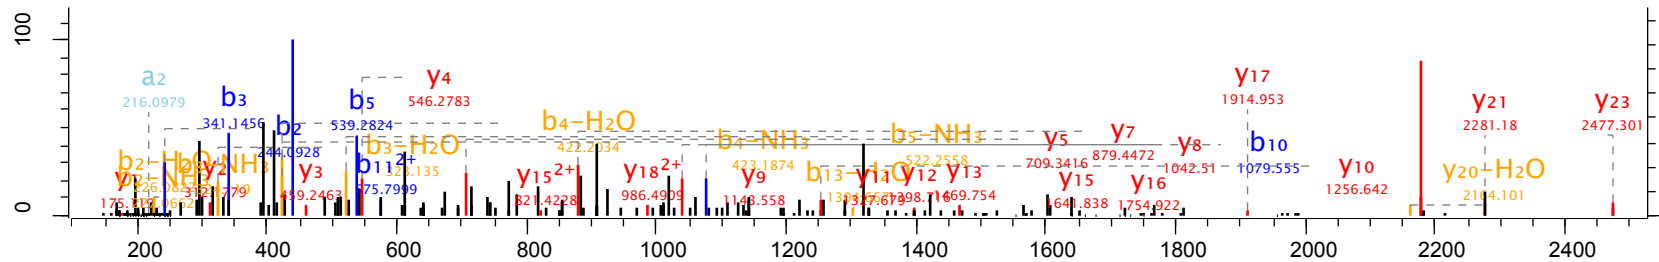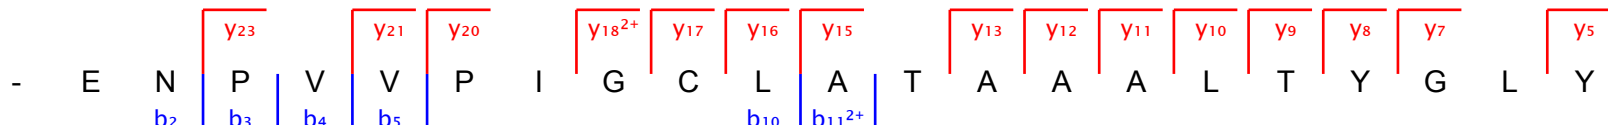

Raw file

20140918\_fract15\_dyn\_5ul\_E7\_01\_383

Scan

10912

Method

TOF; CID

Score

109.72

m/z

613.83

Gene names

TMC7

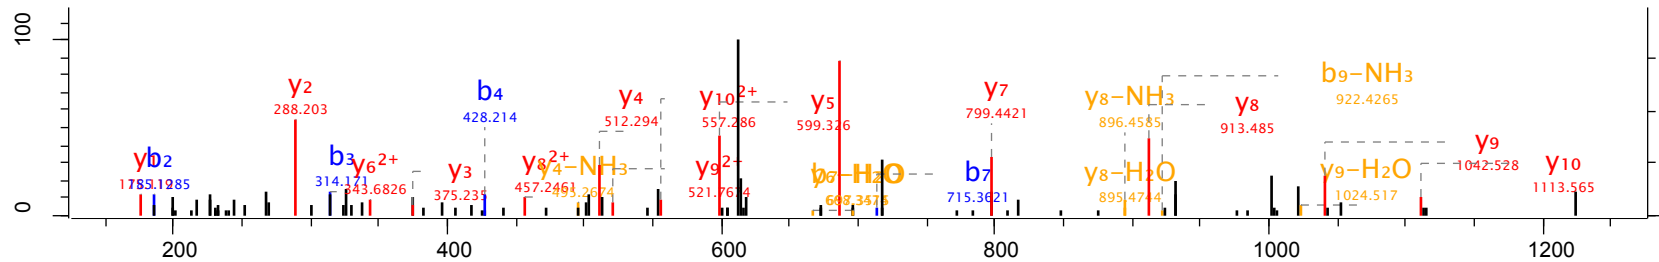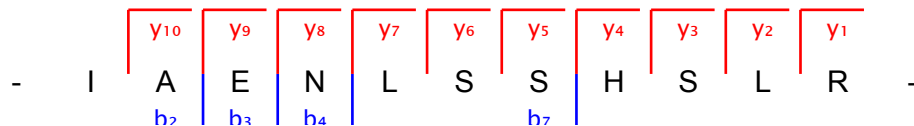



Raw file

20140918\_fract15\_dyn\_5ul\_E7\_01\_383

Scan

35442

Method

TOF; CID

Score

179.74

m/z

935.51

Gene names

VAMP1

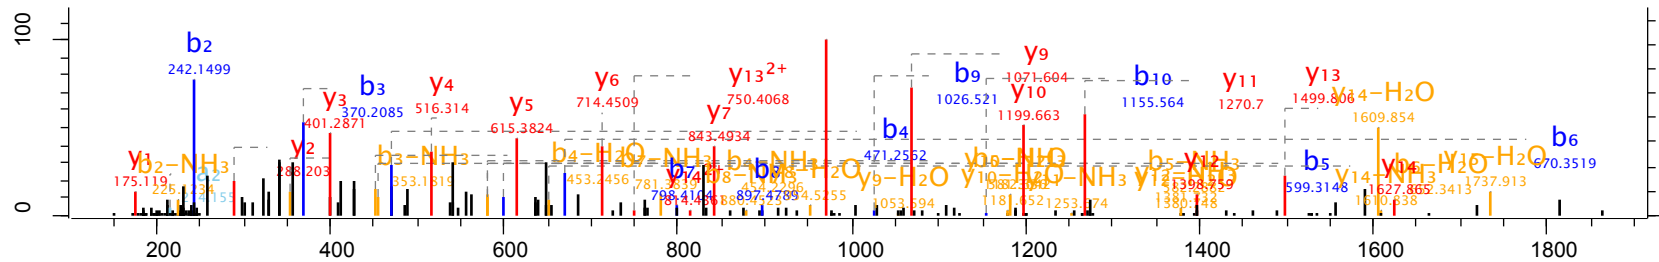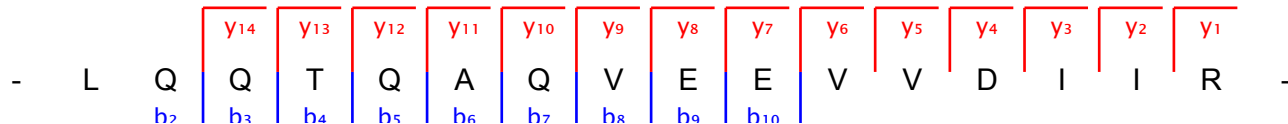

| Raw file                           | Scan  | Method   | Score  | m/z    | Gene names |
|------------------------------------|-------|----------|--------|--------|------------|
| 20140918_fract15_dyn_5ul_E7_01_383 | 36900 | TOF; CID | 125.74 | 615.86 | ORAOV1     |

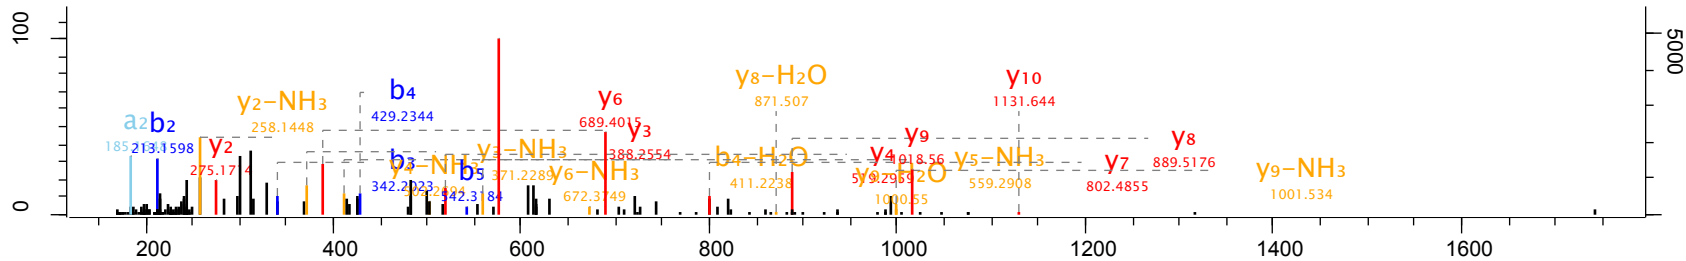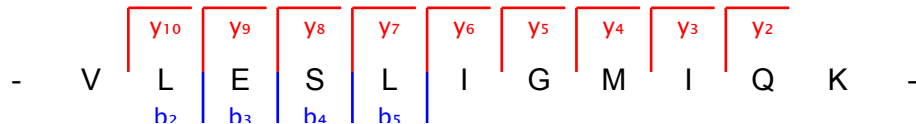

Raw file

20140918\_fract16\_dyn\_5ul\_E8\_01\_384

Scan

10407

Method

TOF; CID

Score

108.72

m/z

637.81

Gene names

FUNDC1

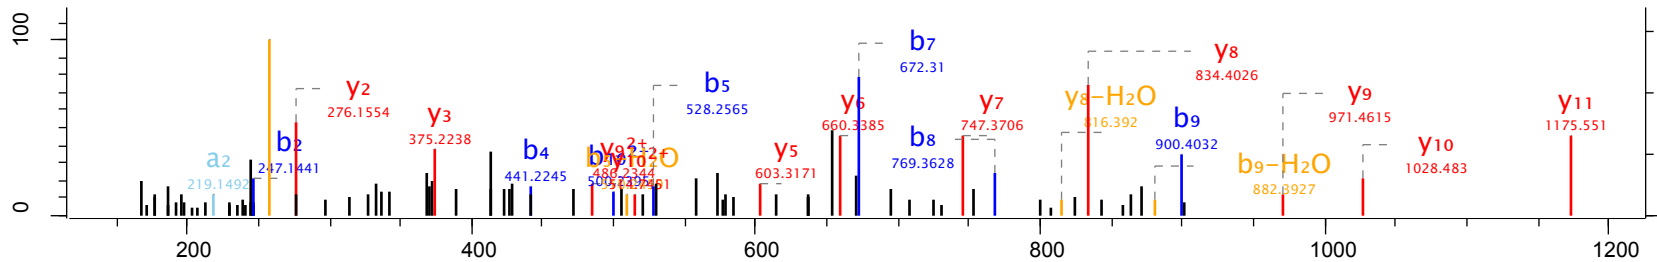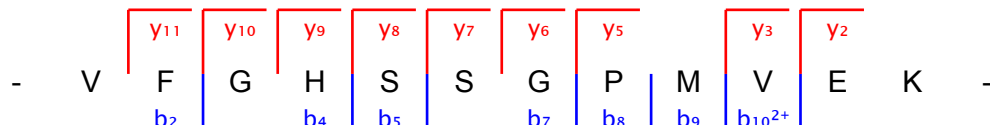

Raw file

20140918\_fract16\_dyn\_5ul\_E8\_01\_384

Scan

15801

Method

TOF; CID

Score

130.41

m/z

631.79

Gene names

CRLS1

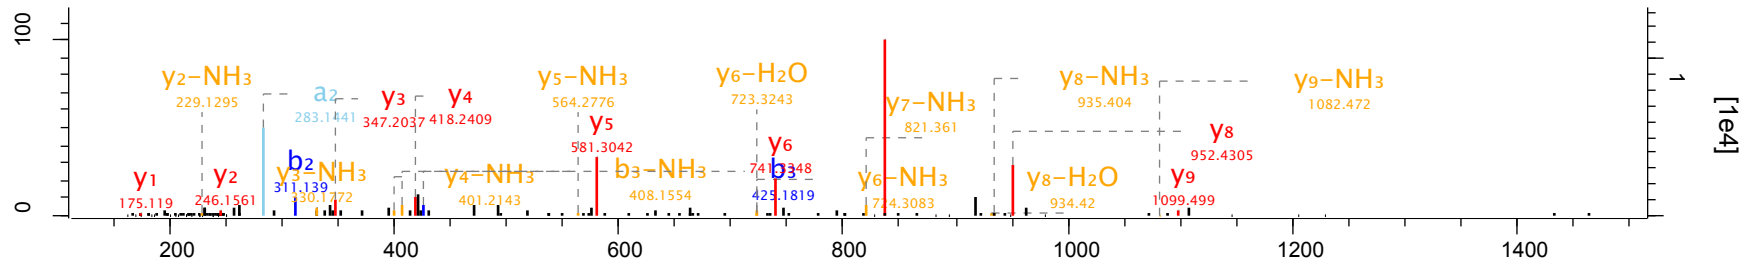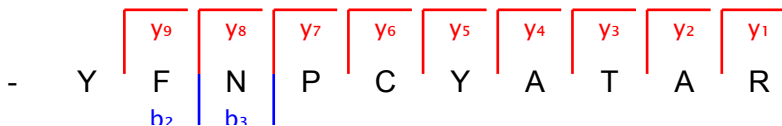

Raw file

20140918\_fract16\_dyn\_5ul\_E8\_01\_384

Scan

19188

Method

TOF; CID

Score

147.26

m/z

705.36

Gene names

TMEM69

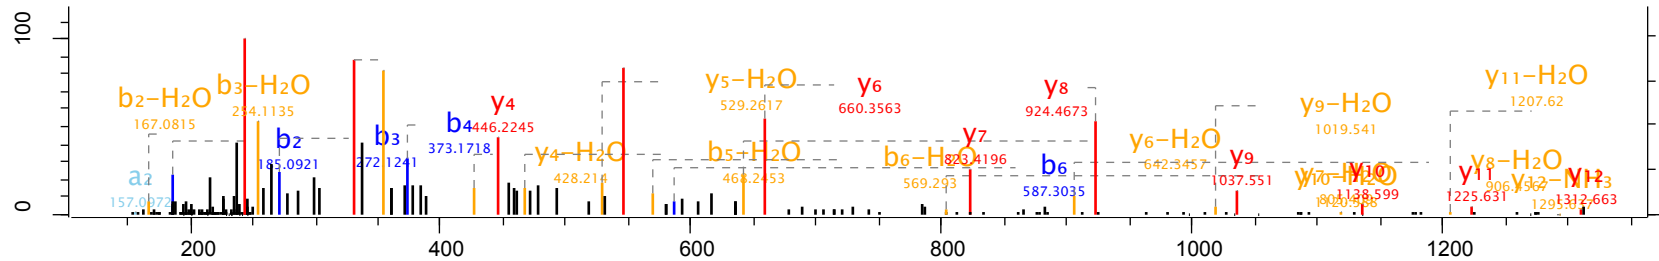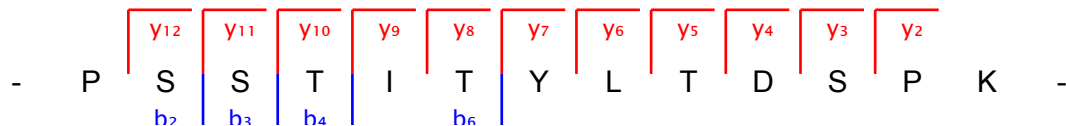

| Raw file                           | Scan  | Method   | Score | m/z    | Gene names |
|------------------------------------|-------|----------|-------|--------|------------|
| 20140918_fract16_dyn_5ul_E8_01_384 | 21868 | TOF; CID | 99.82 | 517.78 | TMEM18     |

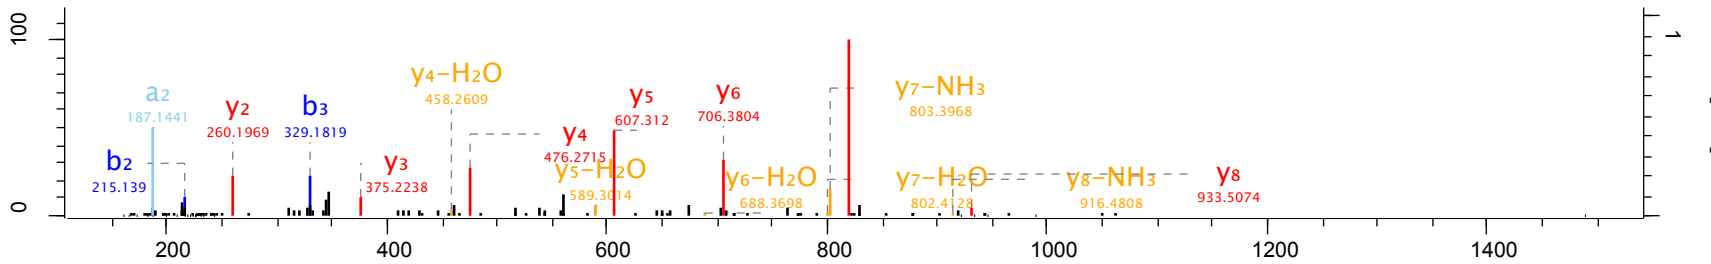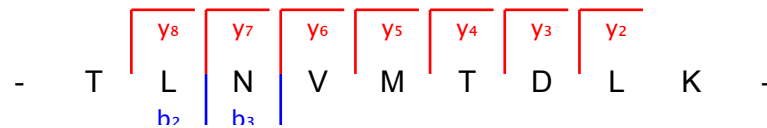

Raw file

20140918\_fract16\_dyn\_5ul\_E8\_01\_384

Scan

25775

Method

TOF; CID

Score

74.96

m/z

648.83

Gene names

GSKIP

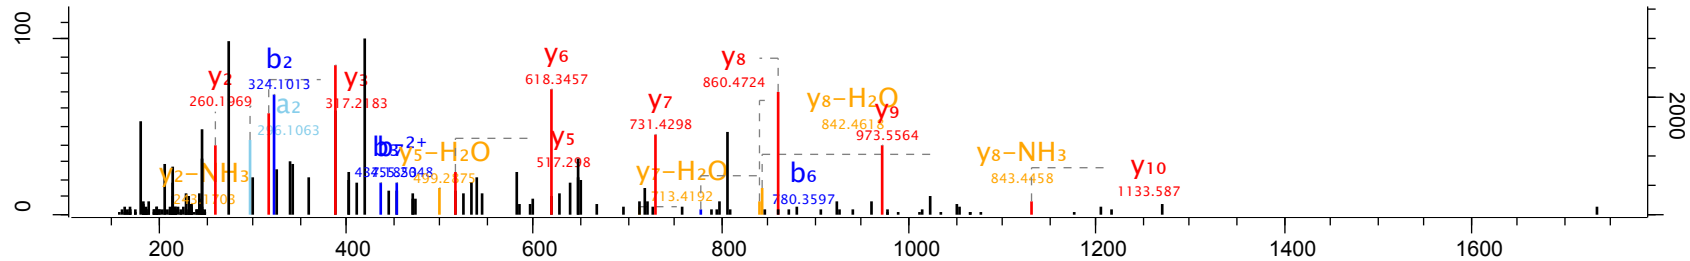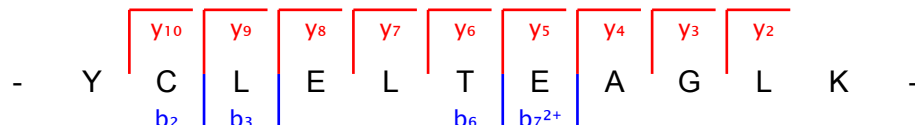

Raw file

20140918\_fract17\_dyn\_5ul\_F1\_01\_385

Scan

20475

Method

TOF; CID

Score

68.58

m/z

563.64

Gene names

ELF4

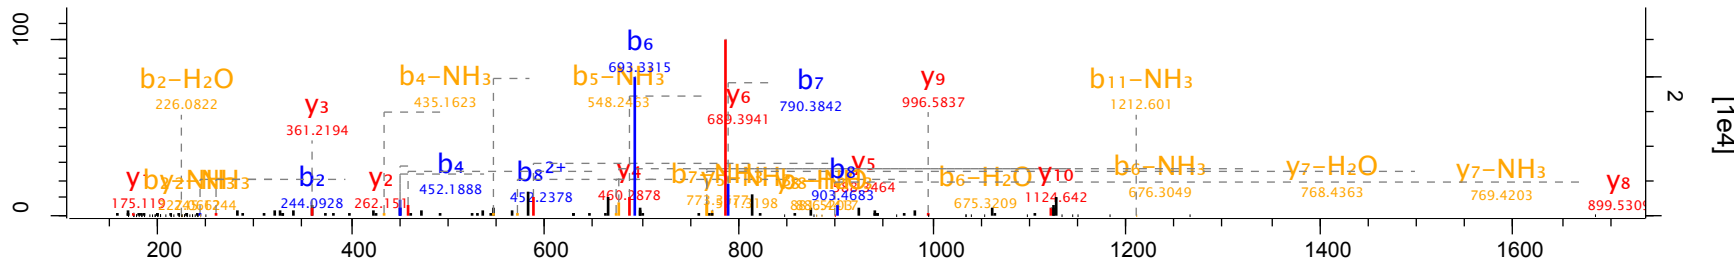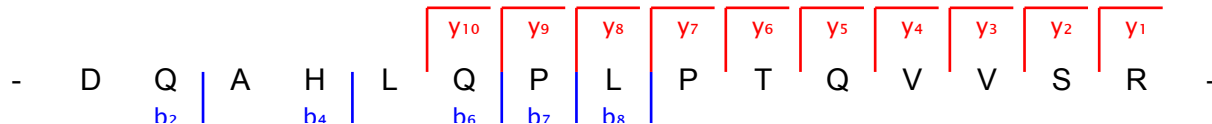



| Raw file                           | Scan  | Method   | Score | m/z    | Gene names |
|------------------------------------|-------|----------|-------|--------|------------|
| 20140918_fract17_dyn_5ul_F1_01_385 | 21637 | TOF; CID | 76.33 | 637.84 | FICD       |

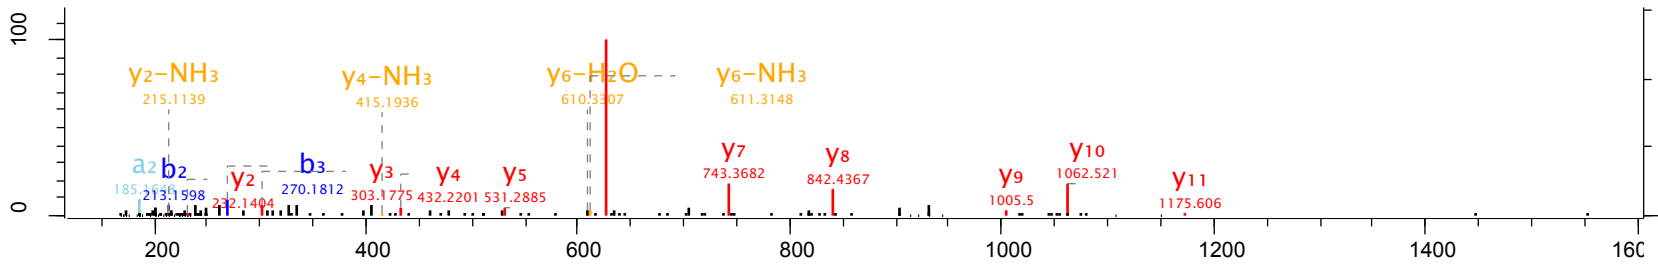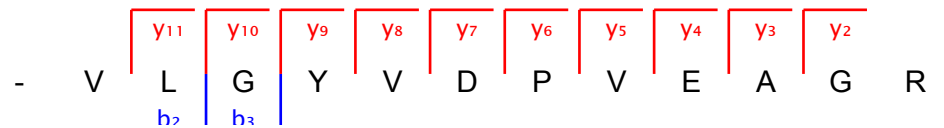

[1e4]

| Raw file                           | Scan  | Method   | Score | m/z    | Gene names |
|------------------------------------|-------|----------|-------|--------|------------|
| 20140918_fract17_dyn_5ul_F1_01_385 | 27872 | TOF; CID | 65.37 | 862.46 | PSENN      |

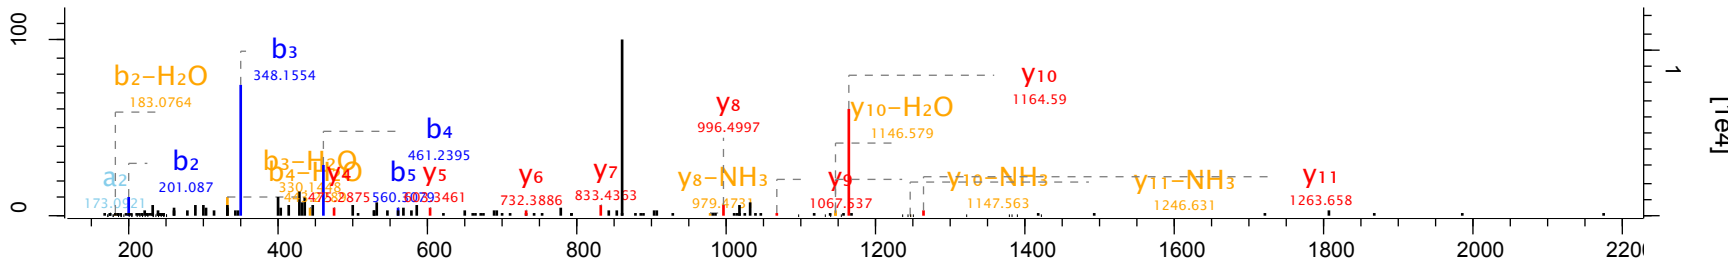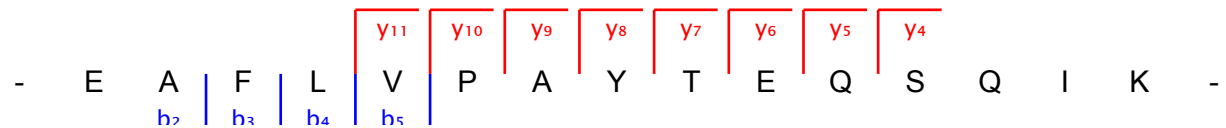

Raw file

20140918\_fract17\_dyn\_5ul\_F1\_01\_385

Scan

28637

Method

TOF; CID

Score

76.3

m/z

1074.52

Gene names

GGACT

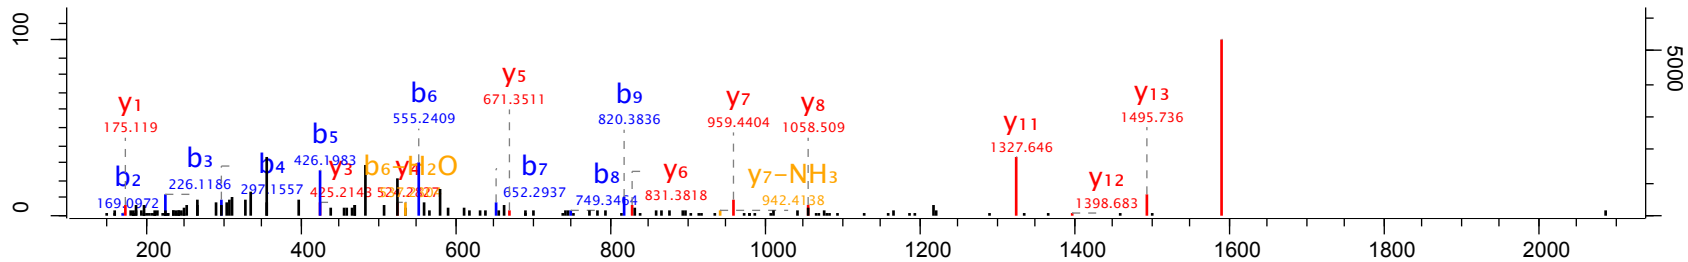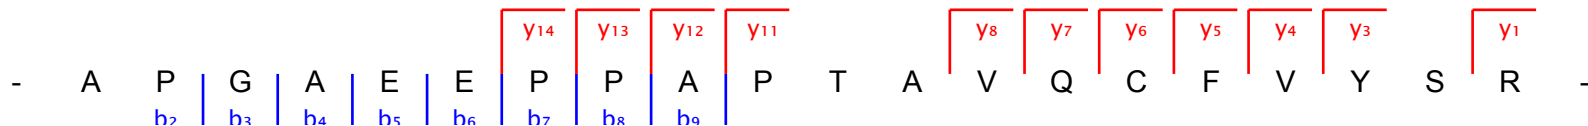

Raw file

20140918\_fract17\_dyn\_5ul\_F1\_01\_385

Scan

32221

Method

TOF; CID

Score

44.93

m/z

963.44

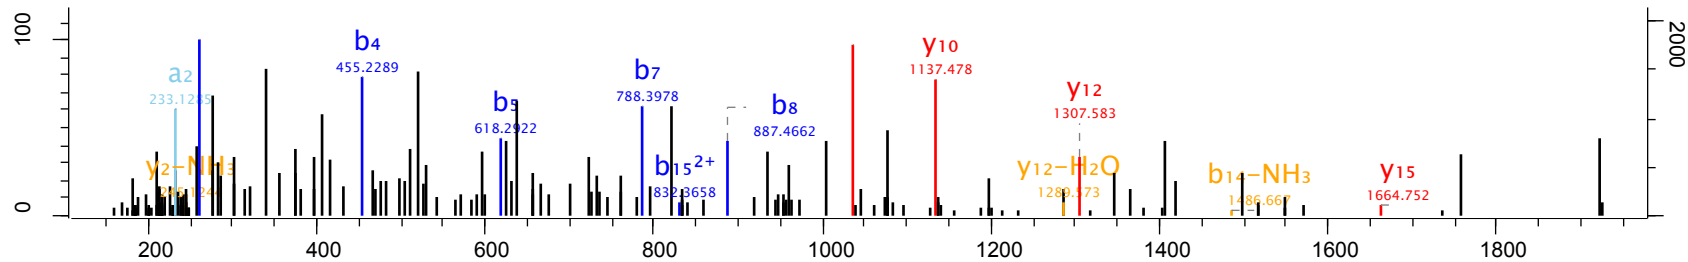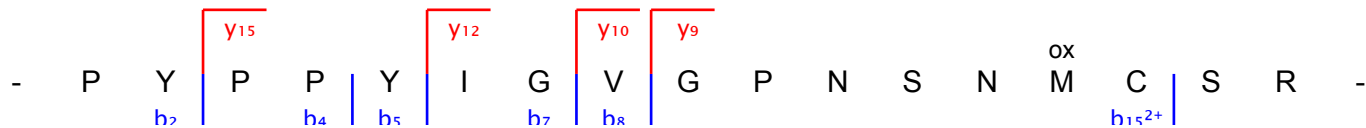

| Raw file                           | Scan  | Method   | Score | m/z    | Gene names |
|------------------------------------|-------|----------|-------|--------|------------|
| 20140918_fract18_dyn_5ul_F2_01_386 | 19576 | TOF; CID | 72.85 | 436.91 | LAMB2      |

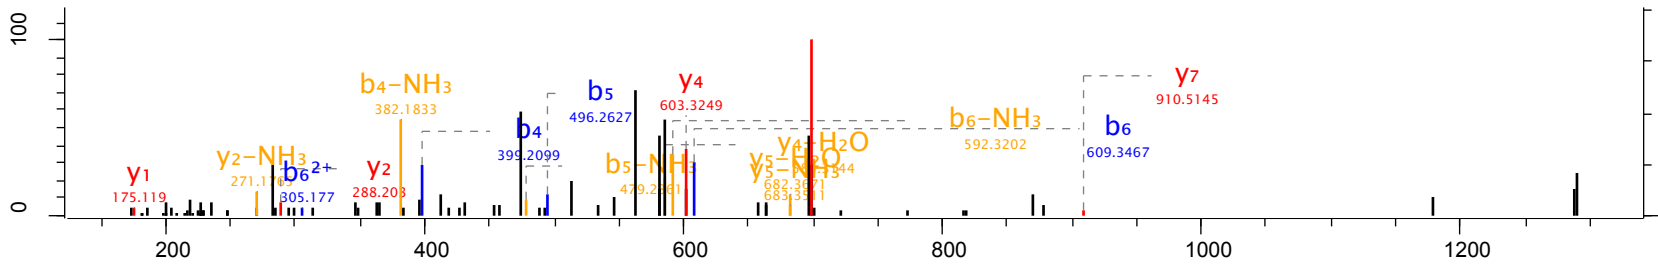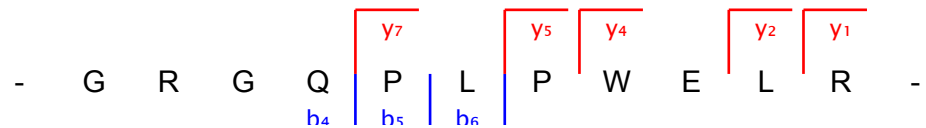

Raw file

20140918\_fract18\_dyn\_5ul\_F2\_01\_386

Scan

27291

Method

TOF; CID

Score

55.55

m/z

830.4

Gene names

C11orf74

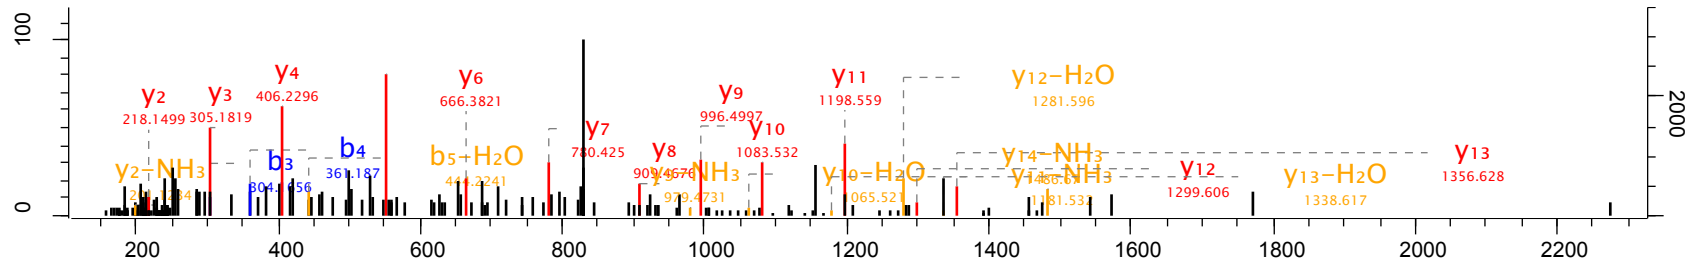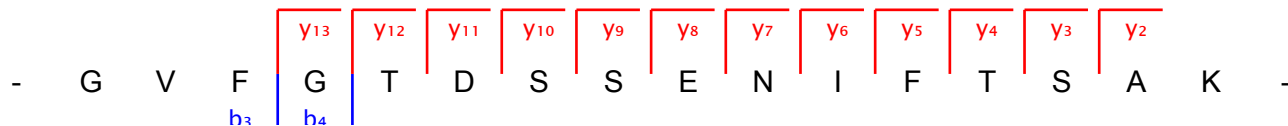

| Raw file                           | Scan  | Method   | Score  | m/z     | Gene names |
|------------------------------------|-------|----------|--------|---------|------------|
| 20140918_fract18_dyn_5ul_F2_01_386 | 29698 | TOF; CID | 103.42 | 1101.17 | CEBPG      |

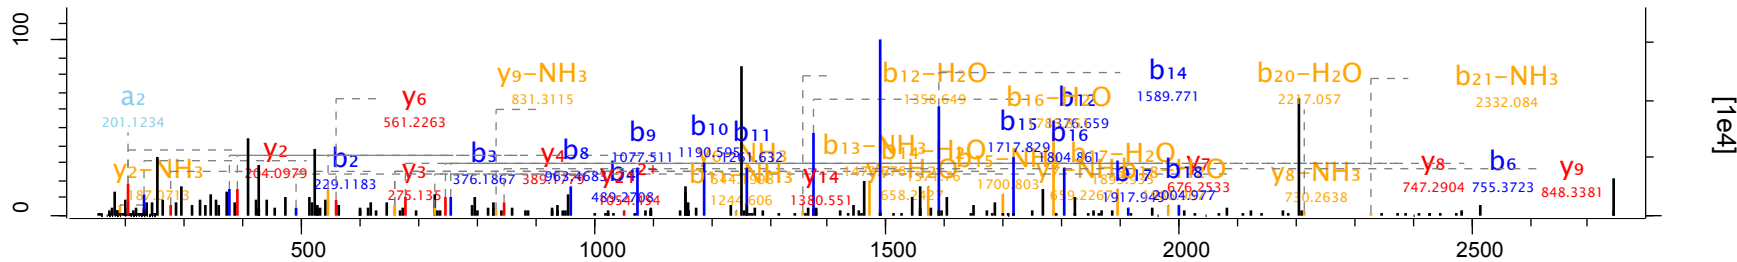

- D L F L E H A H N L A D N V Q S I S T E N

b<sub>2</sub>
b<sub>3</sub>
b<sub>4</sub>
b<sub>6</sub>
b<sub>8</sub>
b<sub>9</sub>
b<sub>10</sub>
b<sub>11</sub>
b<sub>12</sub>
b<sub>13</sub>
b<sub>14</sub>
b<sub>15</sub>
b<sub>16</sub>
b<sub>17</sub>
b<sub>18</sub>

y<sub>21</sub><sup>2+</sup>
y<sub>14</sub>

| Raw file                           | Scan  | Method   | Score | m/z    | Gene names |
|------------------------------------|-------|----------|-------|--------|------------|
| 20140918_fract18_dyn_5ul_F2_01_386 | 30818 | TOF; CID | 70.94 | 633.81 | BACE1      |

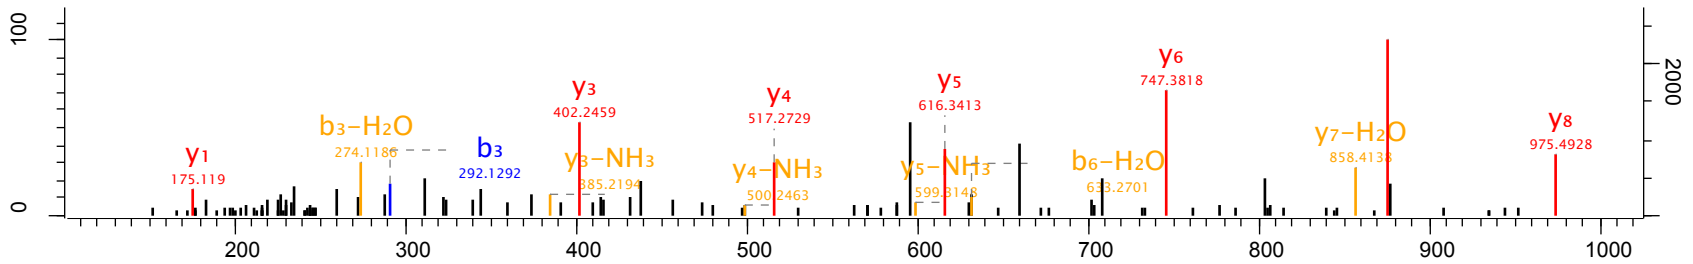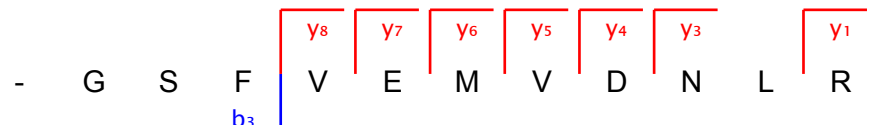



Raw file 20140918\_fract18\_dyn\_5ul\_F2\_01\_386 Scan 35229 Method TOF; CID Score 77.78 m/z 742.89 Gene names AURKAIP1

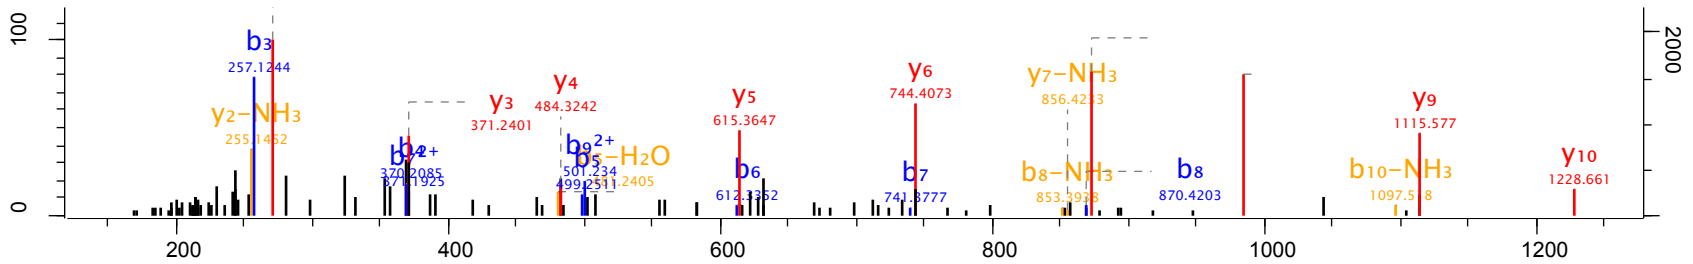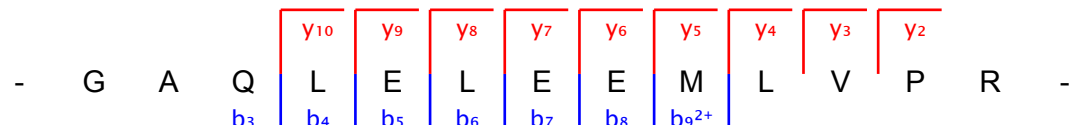

| Raw file                           | Scan  | Method   | Score  | m/z    | Gene names |
|------------------------------------|-------|----------|--------|--------|------------|
| 20140918_fract19_dyn_5ul_F3_01_387 | 18389 | TOF; CID | 147.52 | 476.24 | MAPK15     |

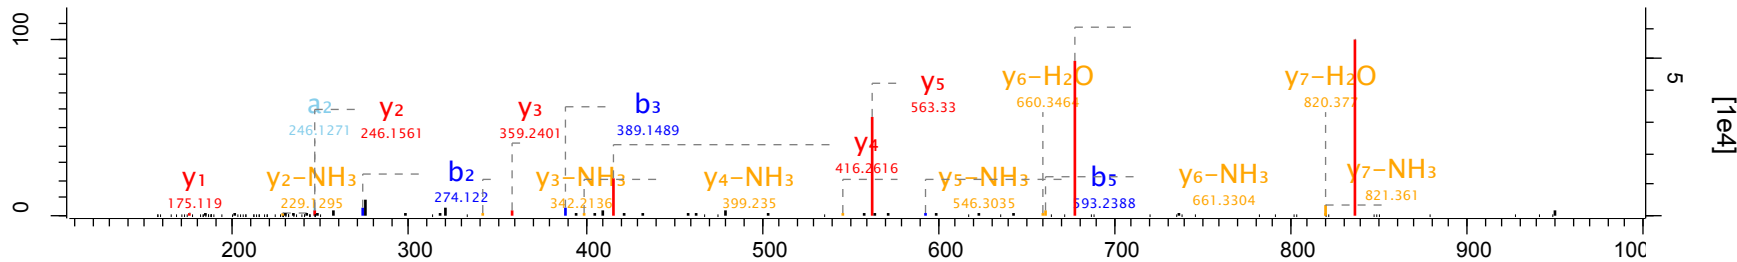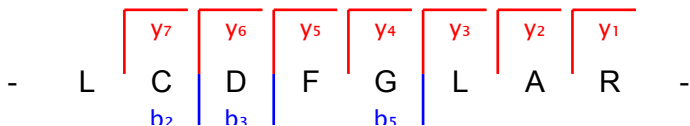

Raw file

20140918\_fract19\_dyn\_5ul\_F3\_01\_387

Scan

19285

Method

TOF; CID

Score

95.41

m/z

731.36

Gene names

ZDHHC24

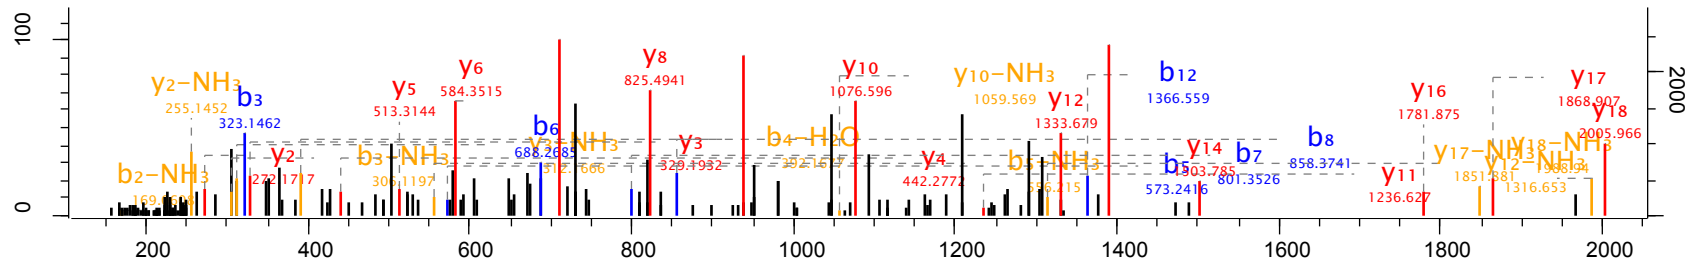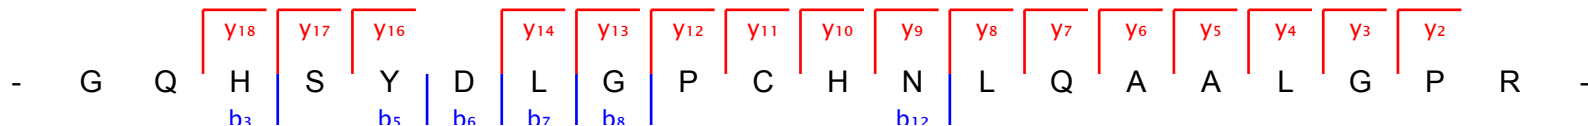

| Raw file                           | Scan  | Method   | Score | m/z    | Gene names |
|------------------------------------|-------|----------|-------|--------|------------|
| 20140918_fract19_dyn_5ul_F3_01_387 | 24337 | TOF; CID | 79.09 | 771.36 | FBXO17     |

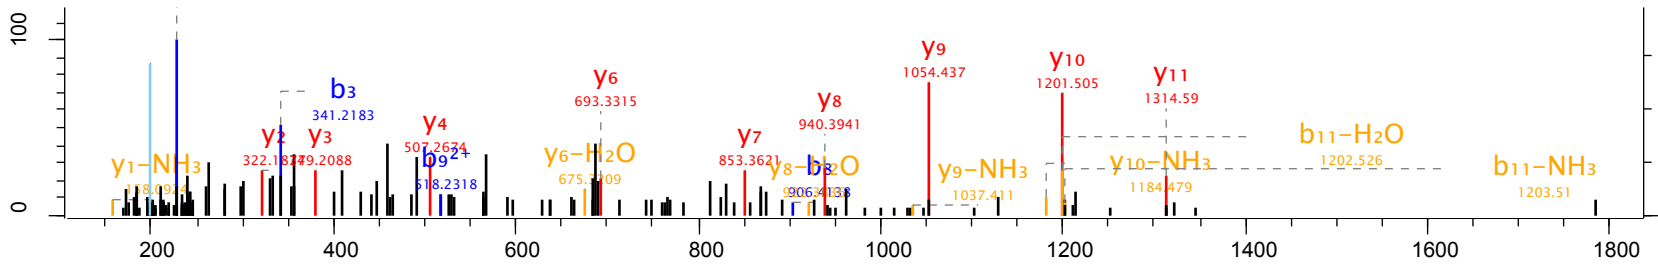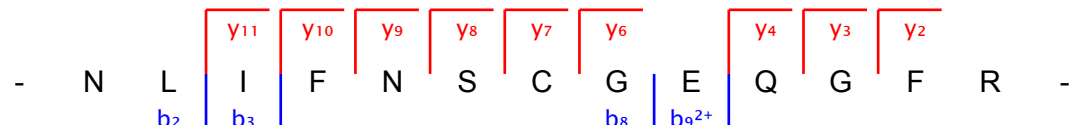

Raw file

20140918\_fract20\_dyn\_5ul\_F4\_01\_388

Scan

16067

Method

TOF; CID

Score

93.18

m/z

505.78

Gene names

NAIF1

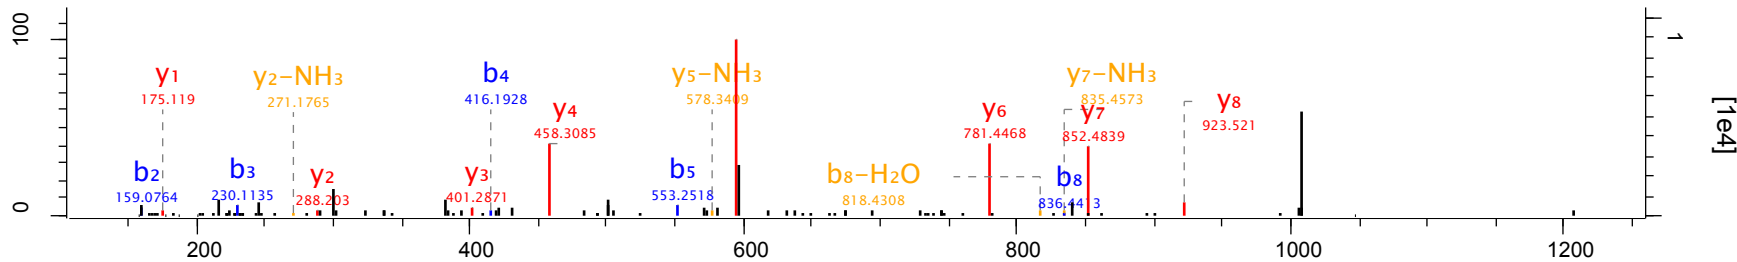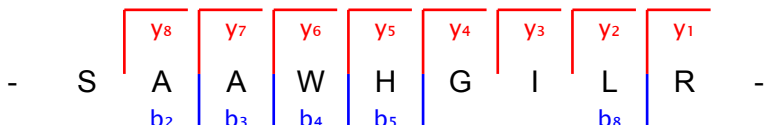

Raw file

20140918\_fract20\_dyn\_5ul\_F4\_01\_388

Scan

17487

Method

TOF; CID

Score

30.94

m/z

624.83

Gene names

ZNF831

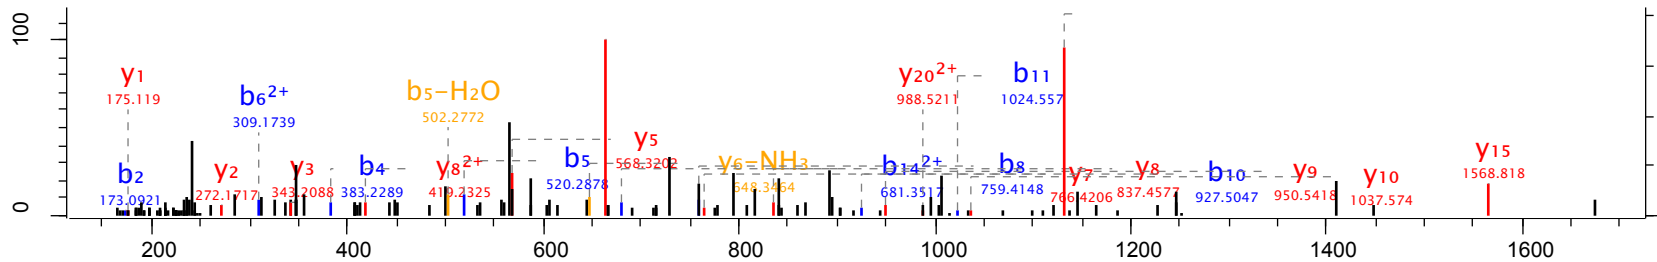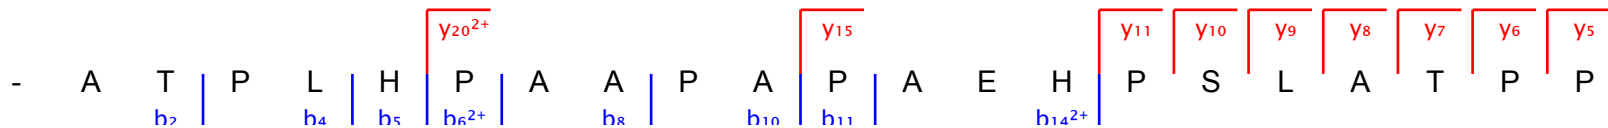

Raw file

20140918\_fract21\_dyn\_5ul\_F5\_01\_389

Scan

24025

Method

TOF; CID

Score

52.48

m/z

741.03

Gene names

ZBTB8A

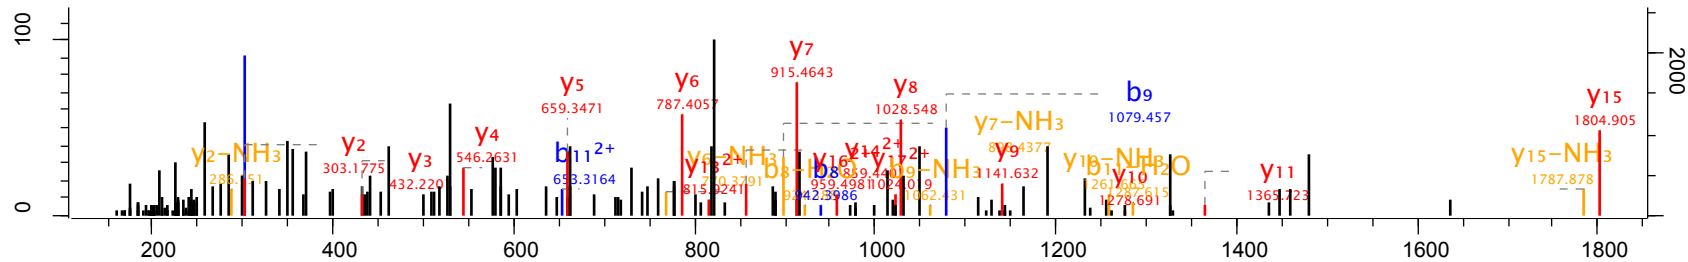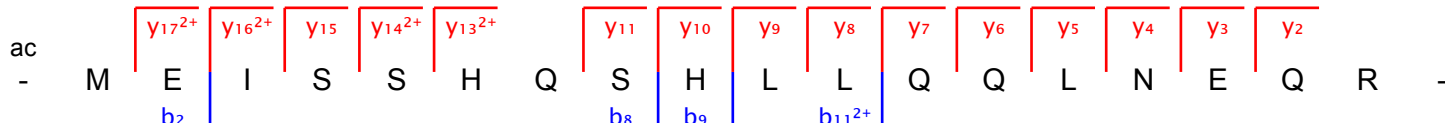

| Raw file                           | Scan  | Method   | Score  | m/z    | Gene names |
|------------------------------------|-------|----------|--------|--------|------------|
| 20140918_fract21_dyn_5ul_F5_01_389 | 24342 | TOF; CID | 109.11 | 486.29 | LGI1       |

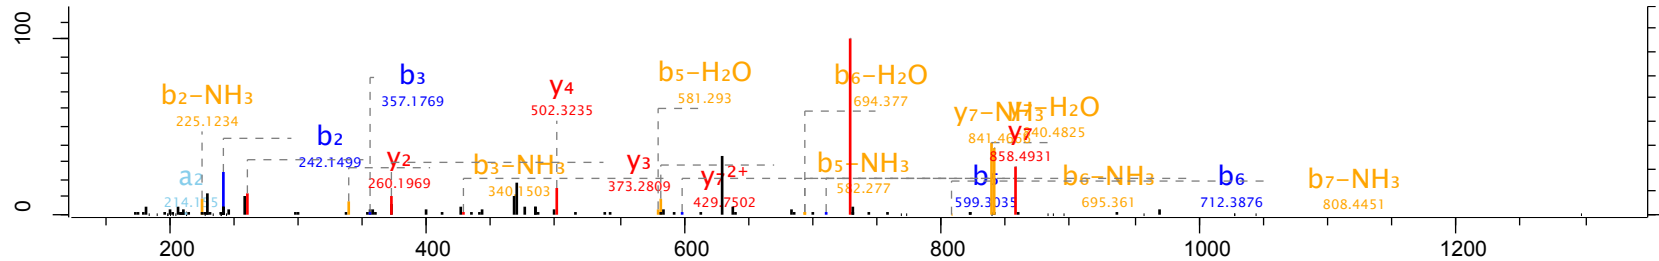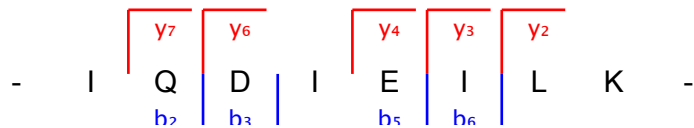



Raw file

Scan

Method

Score

m/z

Gene names

20140918\_fract21\_dyn\_5ul\_F5\_01\_389

27728

TOF; CID

117.93

731.88

SNAPC5

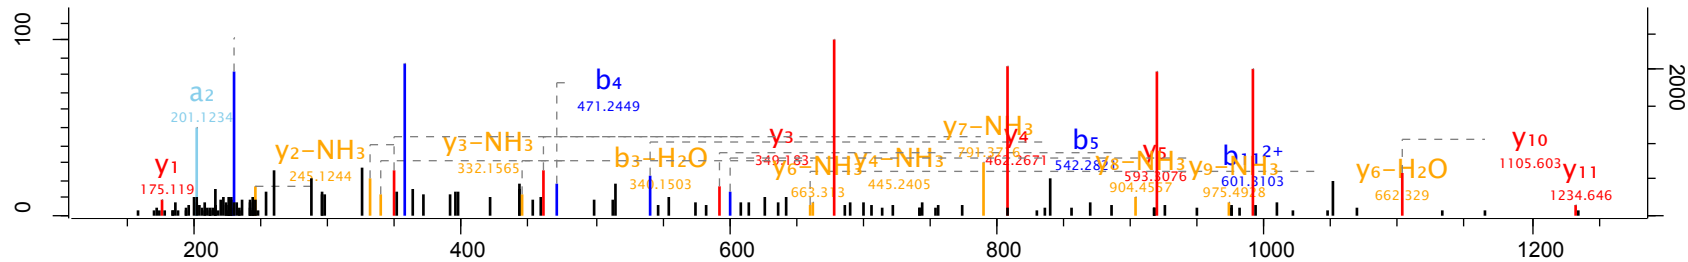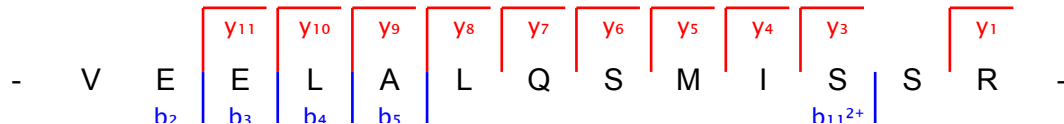

Raw file

20140918\_fract22\_dyn\_5ul\_F6\_01\_390

Scan

12713

Method

TOF; CID

Score

54.95

m/z

604.31

Gene names

HORMAD1

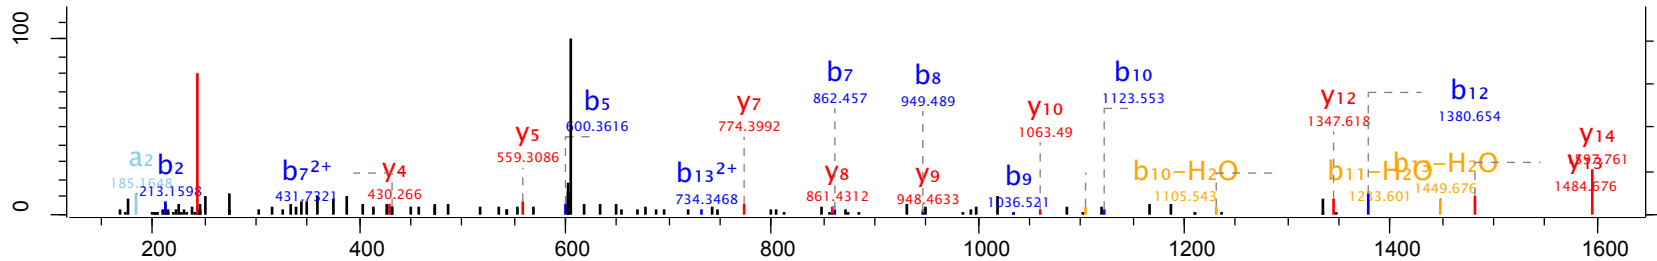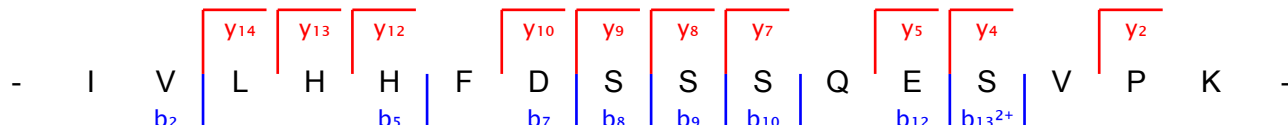

| Raw file                           | Scan  | Method   | Score  | m/z   | Gene names |
|------------------------------------|-------|----------|--------|-------|------------|
| 20140918_fract22_dyn_5ul_F6_01_390 | 32616 | TOF; CID | 102.52 | 813.9 | TSPAN1     |

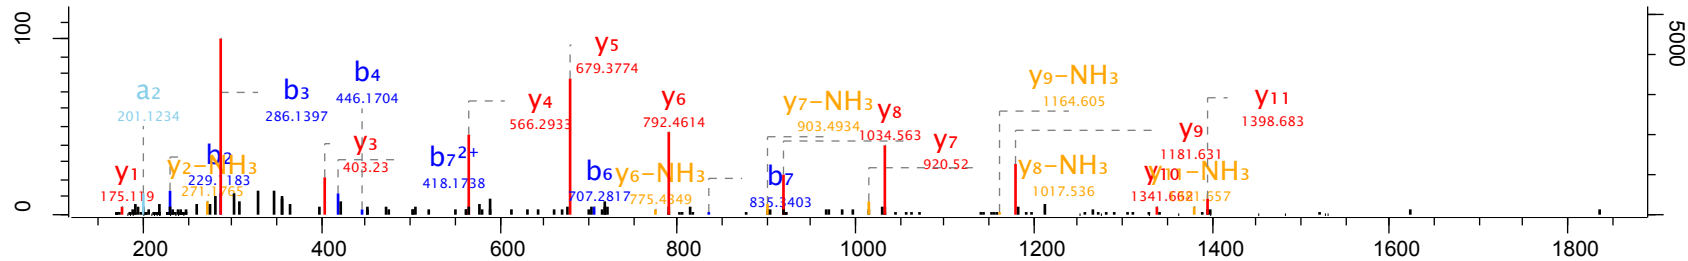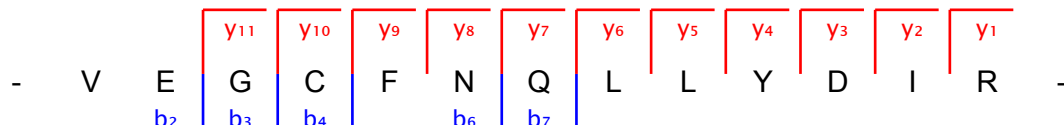

| Raw file                           | Scan  | Method   | Score | m/z    | Gene names |
|------------------------------------|-------|----------|-------|--------|------------|
| 20140918_fract23_dyn_5ul_F7_01_391 | 14436 | TOF; CID | 96.74 | 625.86 | FKRP       |

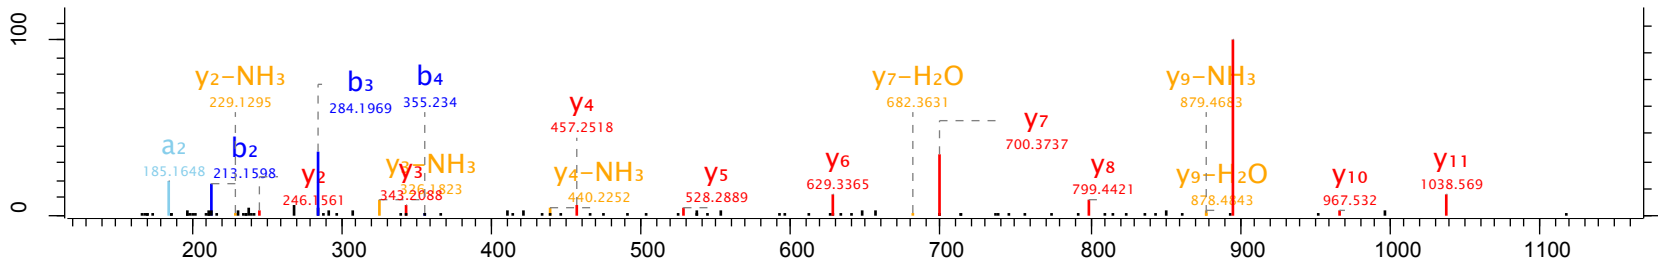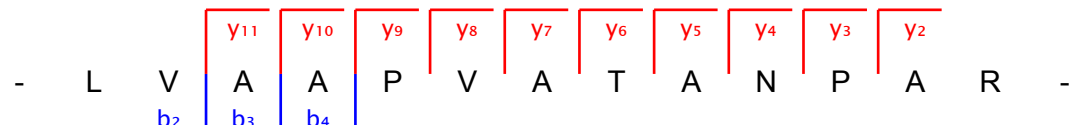

| Raw file                           | Scan  | Method   | Score | m/z    | Gene names |
|------------------------------------|-------|----------|-------|--------|------------|
| 20140918_fract23_dyn_5ul_F7_01_391 | 16629 | TOF; CID | 84.51 | 569.32 | ZNF219     |

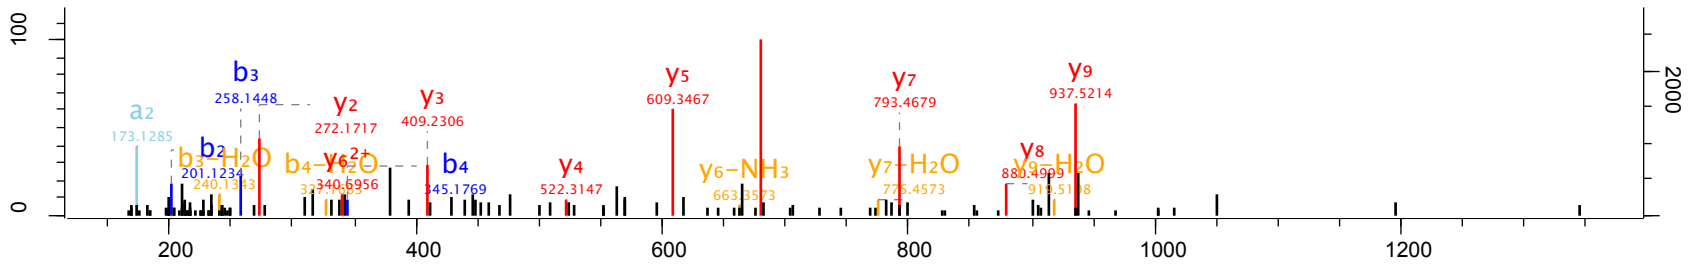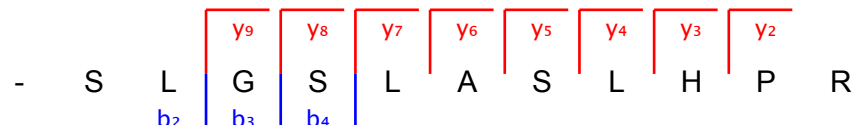

Raw file

20140918\_fract23\_dyn\_5ul\_F7\_01\_391

Scan

18077

Method

TOF; CID

Score

76.07

m/z

734.85

Gene names

STYXL1

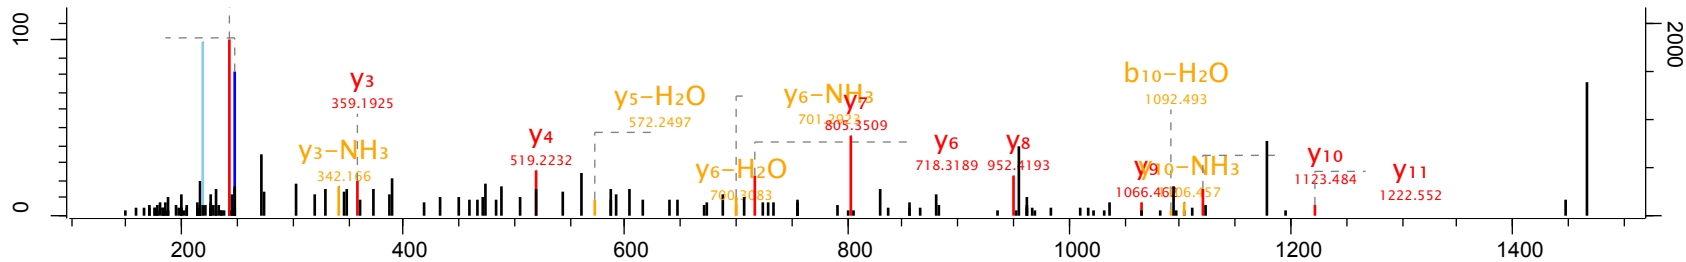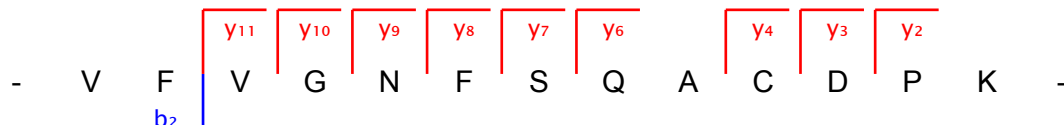

Raw file

20140918\_fract23\_dyn\_5ul\_F7\_01\_391

Scan

21107

Method

TOF; CID

Score

80.37

m/z

800.44

Gene names

ZCCHC10

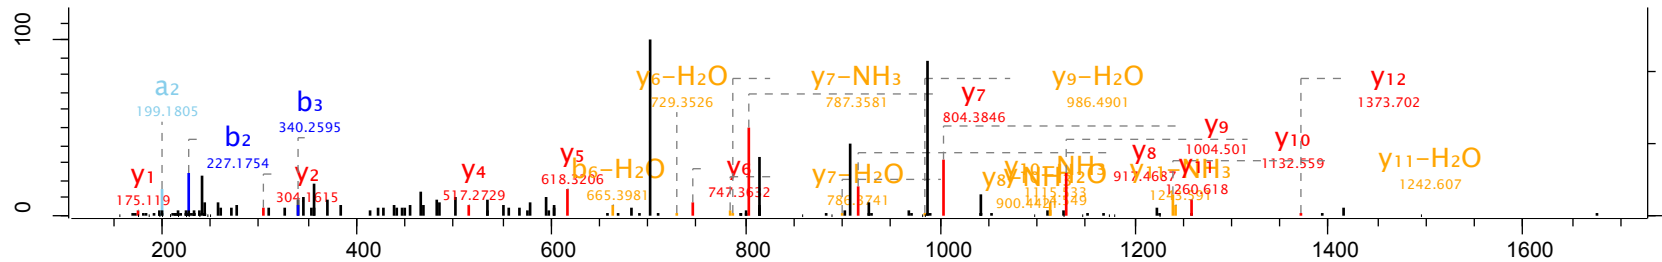

[1e4]

- L L L Q Q S I G E T N V E R -

          b<sub>2</sub>  b<sub>3</sub>

          y<sub>12</sub>  y<sub>11</sub>  y<sub>10</sub>  y<sub>9</sub>  y<sub>8</sub>  y<sub>7</sub>  y<sub>6</sub>  y<sub>5</sub>  y<sub>4</sub>  y<sub>2</sub>  y<sub>1</sub>

Raw file

20140918\_fract23\_dyn\_5ul\_F7\_01\_391

Scan

30129

Method

TOF; CID

Score

69.7

m/z

908.73

Gene names

TSPAN4

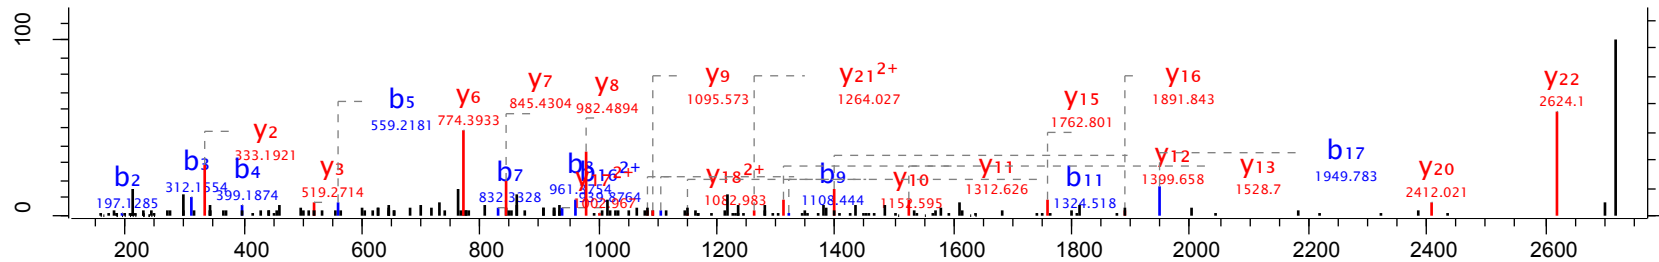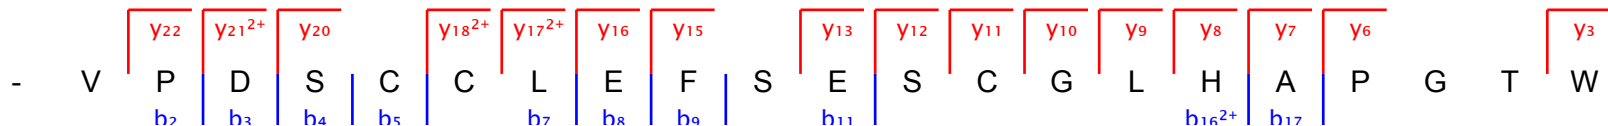



Raw file

20140918\_fract24\_dyn\_5ul\_F8\_01\_392

Scan

20157

Method

TOF; CID

Score

42.12

m/z

762.34

Gene names

PEG10

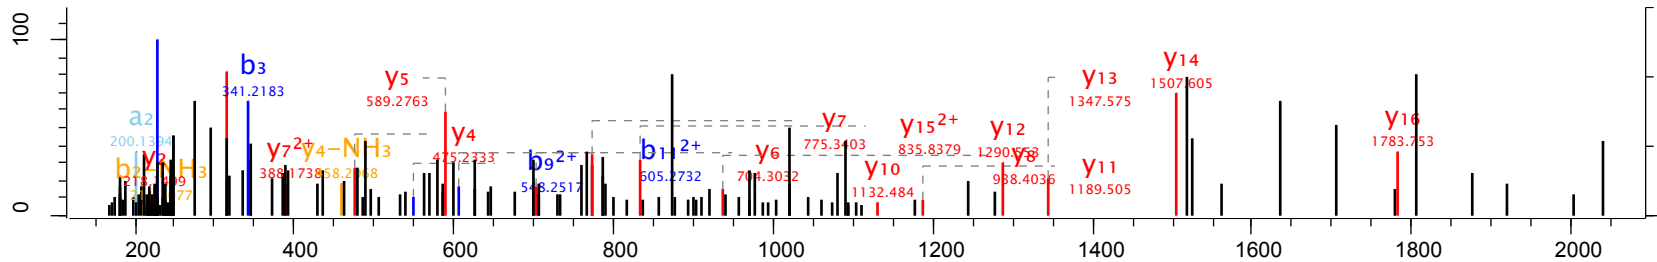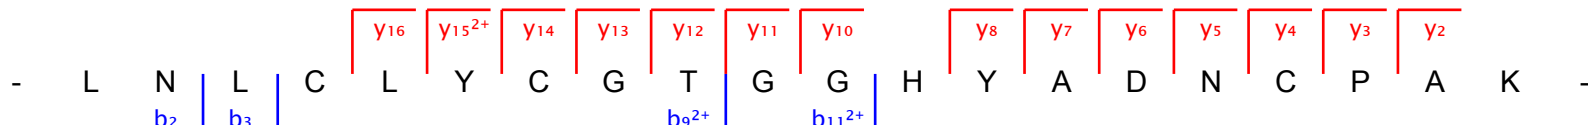

| Raw file                           | Scan  | Method   | Score  | m/z    | Gene names |
|------------------------------------|-------|----------|--------|--------|------------|
| 20140918_fract24_dyn_5ul_F8_01_392 | 29116 | TOF; CID | 139.58 | 512.29 | FAM118A    |

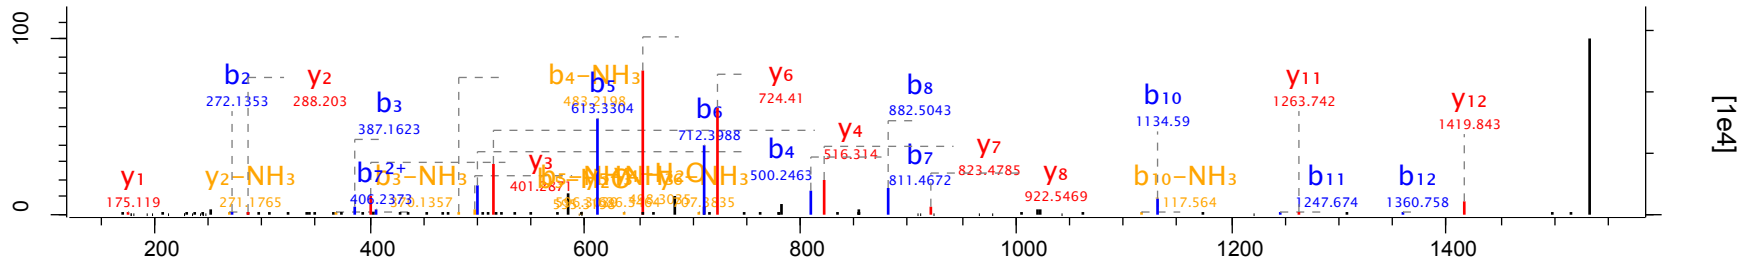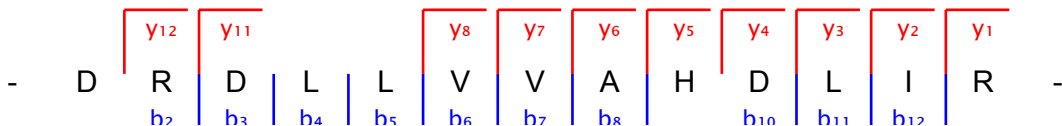

| Raw file                           | Scan  | Method   | Score | m/z    | Gene names |
|------------------------------------|-------|----------|-------|--------|------------|
| 20140918_fract24_dyn_5ul_F8_01_392 | 34044 | TOF; CID | 83.23 | 711.86 | SMIM15     |

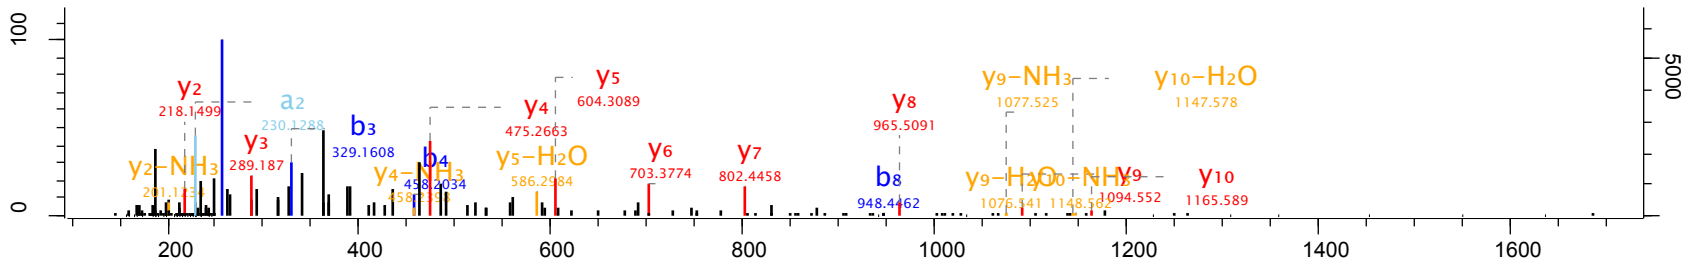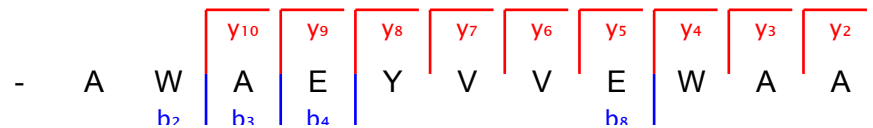

Raw file

20140925\_fract1\_dyn\_5ul\_B1\_01\_436

Scan

3761

Method

TOF; CID

Score

88.5

m/z

538.76

Gene names

TM4SF1

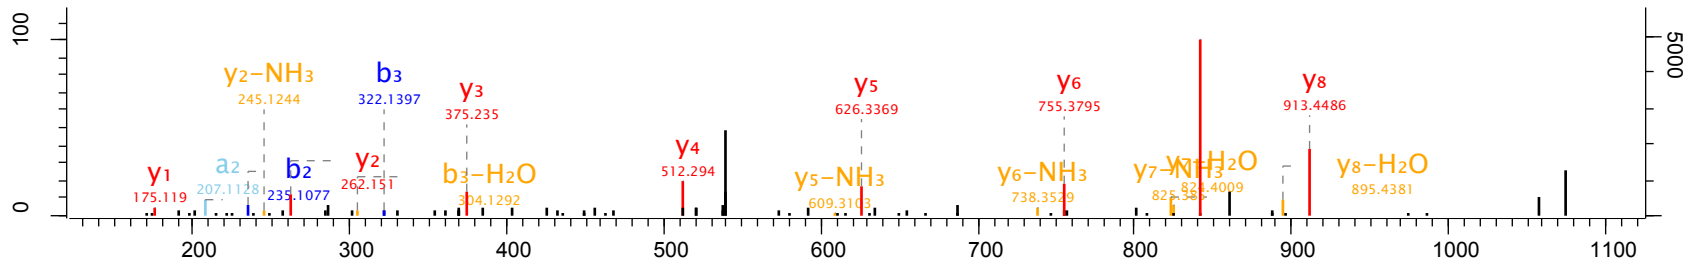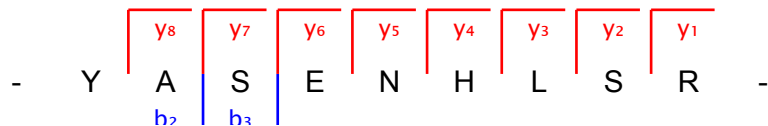

Raw file

20140925\_fract1\_dyn\_5ul\_B1\_01\_436

Scan

17592

Method

TOF; CID

Score

81.8

m/z

726.36

Gene names

SCNN1B

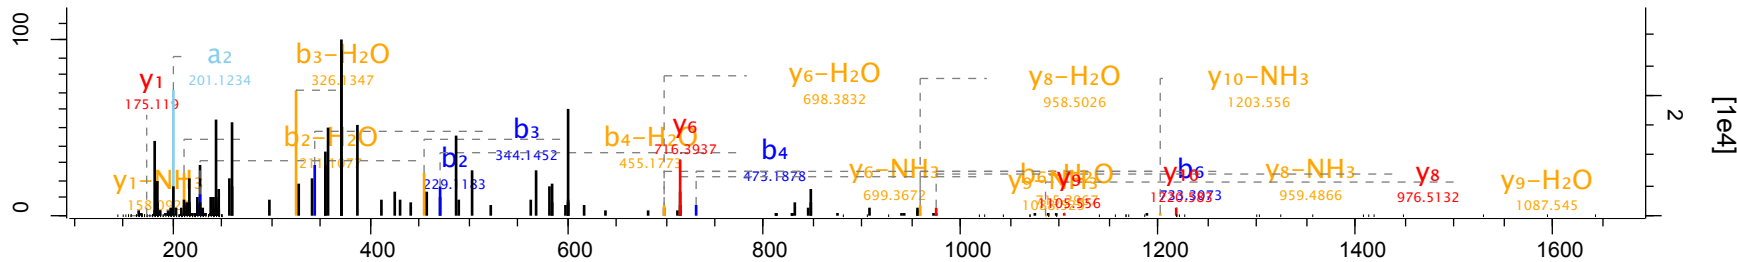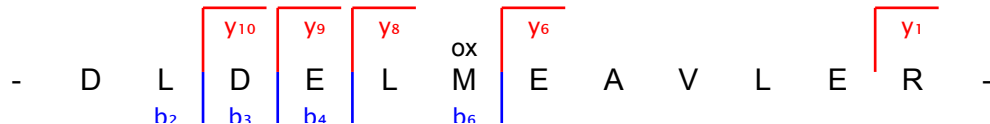

Raw file

20140925\_fract1\_dyn\_5ul\_B1\_01\_436

Scan

30678

Method

TOF; CID

Score

61.28

m/z

999.02

Gene names

GLYCTK

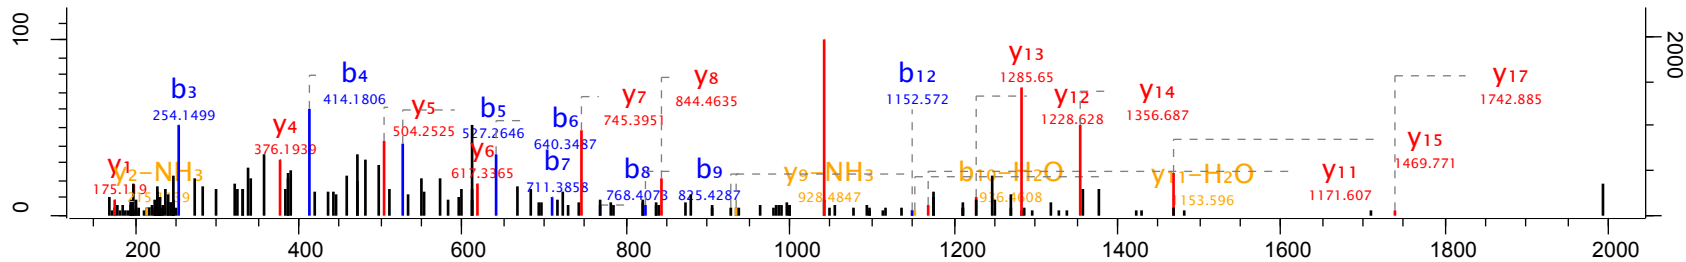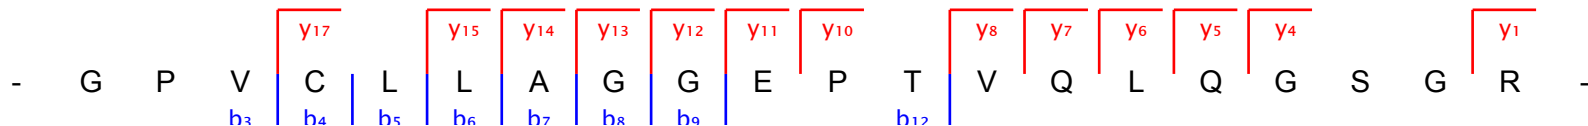

Raw file

20140925\_fract1\_dyn\_5ul\_B1\_01\_436

Scan

37990

Method

TOF; CID

Score

101.3

m/z

613.31

Gene names

TMEM234

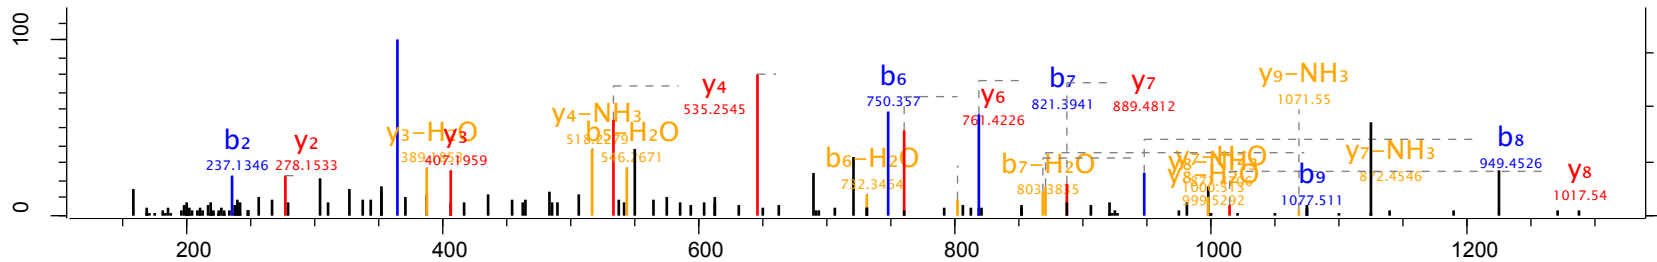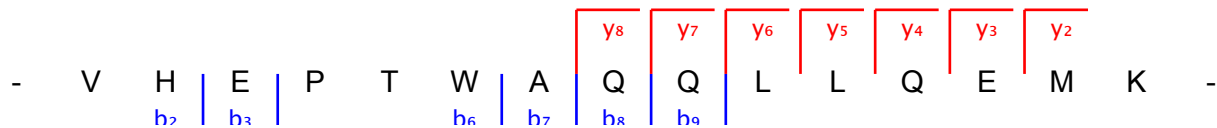

| Raw file                          | Scan  | Method   | Score | m/z    | Gene names |
|-----------------------------------|-------|----------|-------|--------|------------|
| 20140925_fract2_dyn_5ul_B2_01_437 | 11066 | TOF; CID | 79.64 | 660.32 | NDFIP2     |

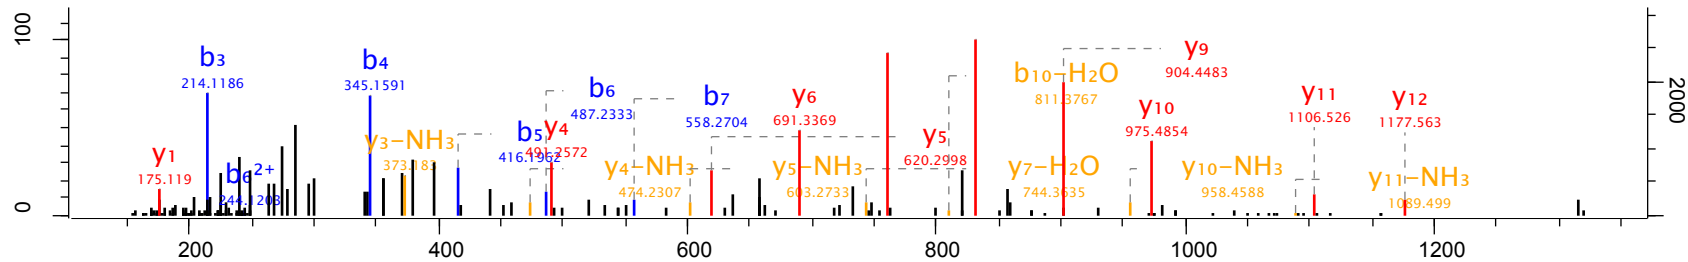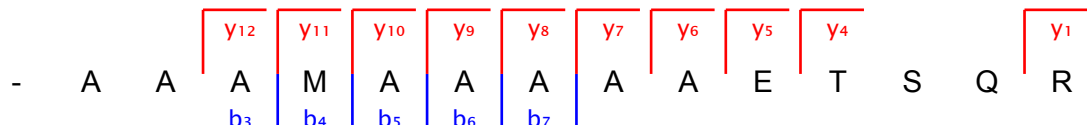



| Raw file                          | Scan  | Method   | Score | m/z   |
|-----------------------------------|-------|----------|-------|-------|
| 20140925_fract2_dyn_5ul_B2_01_437 | 15478 | TOF; CID | 72.2  | 609.8 |

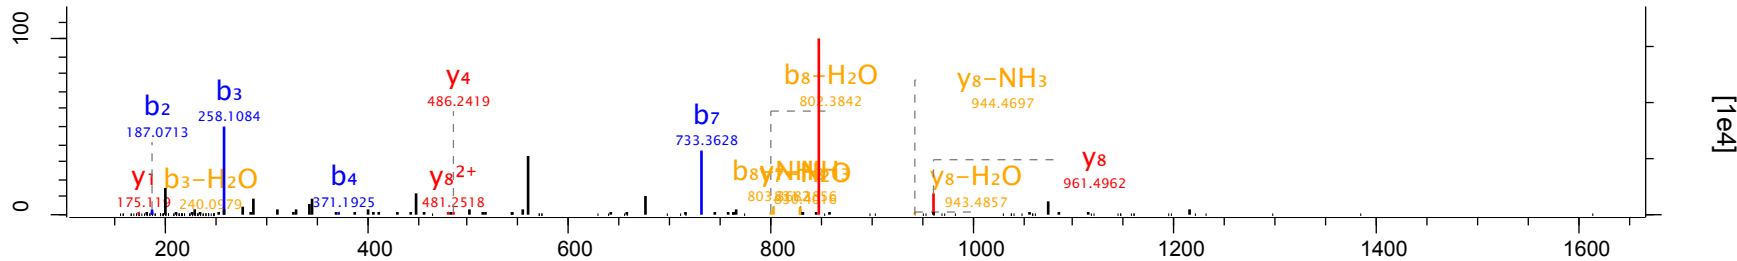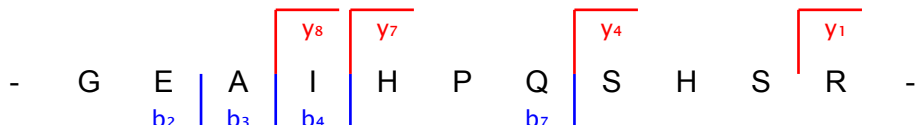

| Raw file                          | Scan  | Method   | Score  | m/z    | Gene names |
|-----------------------------------|-------|----------|--------|--------|------------|
| 20140925_fract2_dyn_5ul_B2_01_437 | 25530 | TOF; CID | 101.32 | 756.86 | FAM73A     |

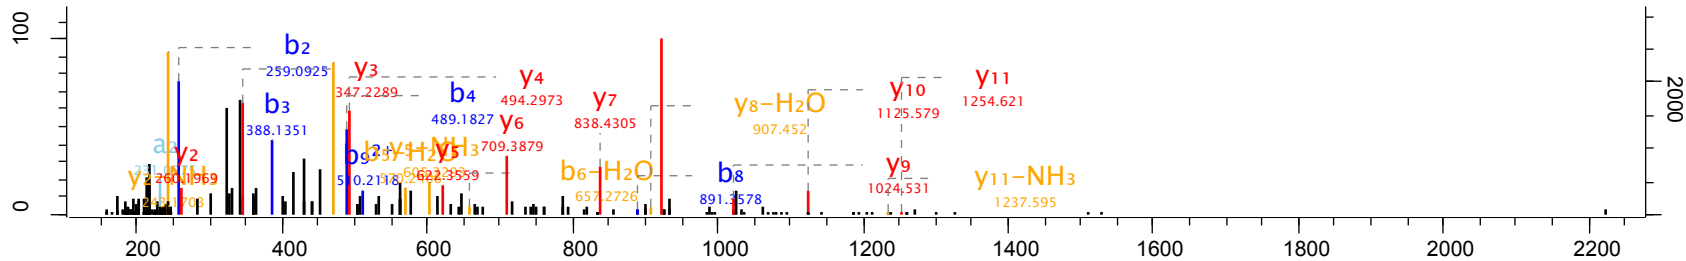

ac

- S E E T V S E S Q F S L K -

b<sub>2</sub> b<sub>3</sub> b<sub>4</sub> b<sub>8</sub> b<sub>9</sub><sup>2+</sup>

y<sub>11</sub> y<sub>10</sub> y<sub>9</sub> y<sub>8</sub> y<sub>7</sub> y<sub>6</sub> y<sub>5</sub> y<sub>4</sub> y<sub>3</sub> y<sub>2</sub>

Raw file

20140925\_fract2\_dyn\_5ul\_B2\_01\_437

Scan

37413

Method

TOF; CID

Score

73.92

m/z

972.02

Gene names

SLC10A7

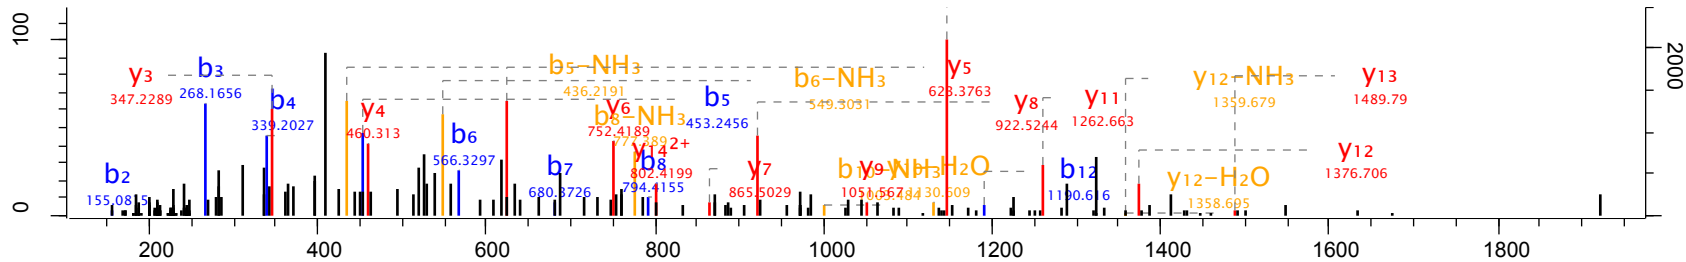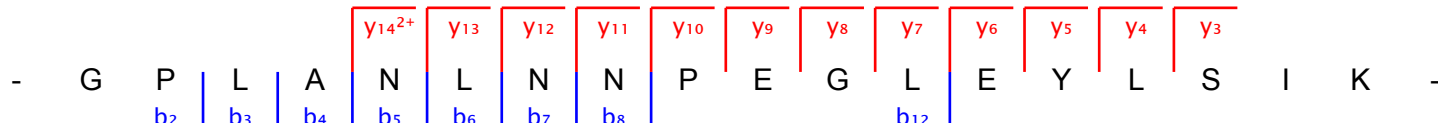

Raw file

20140925\_fract3\_dyn\_5ul\_B3\_01\_438

Scan

14078

Method

TOF; CID

Score

122.33

m/z

630.83

Gene names

TFDP2

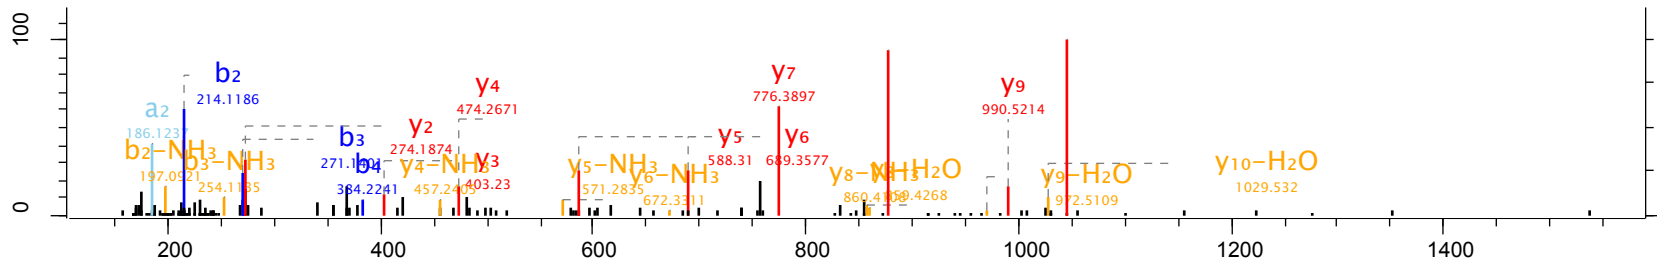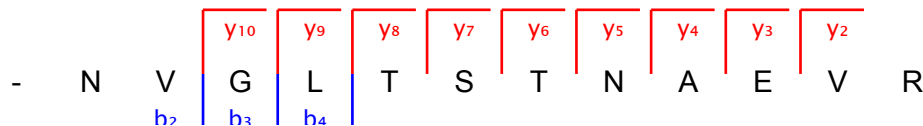

Raw file

20140925\_fract3\_dyn\_5ul\_B3\_01\_438

Scan

17637

Method

TOF; CID

Score

33.32

m/z

778.38

Gene names

FXVD5

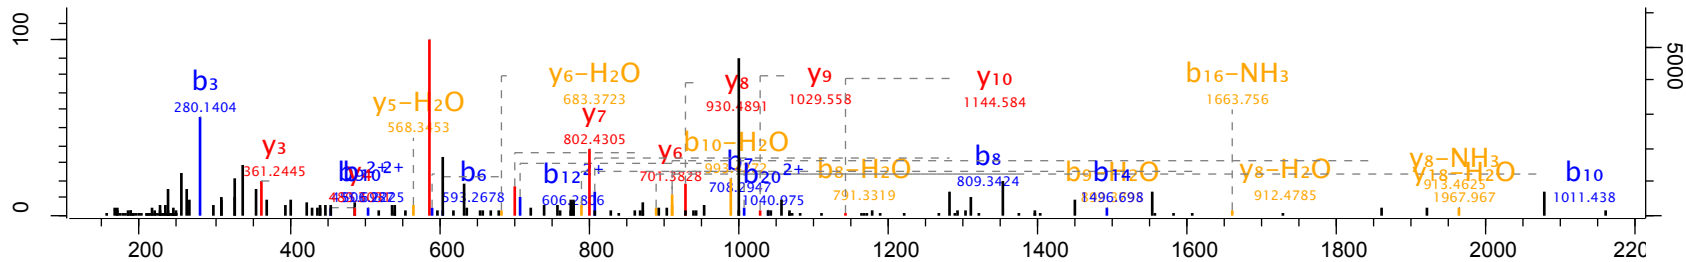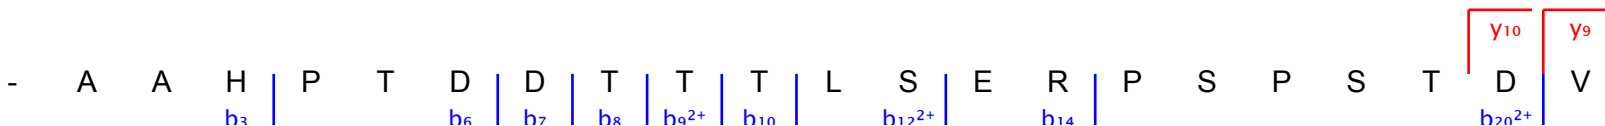

Raw file

20140925\_fract3\_dyn\_5ul\_B3\_01\_438

Scan

32375

Method

TOF; CID

Score

92.26

m/z

996.91

Gene names

CLDN7

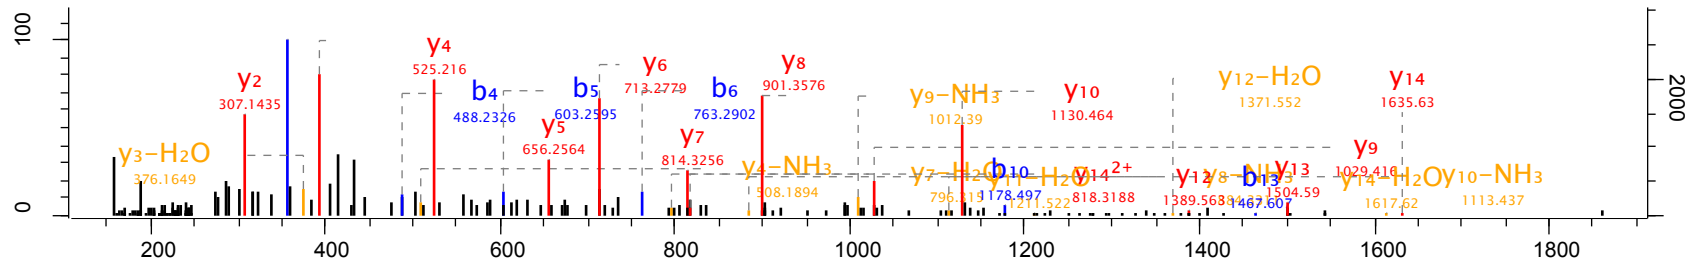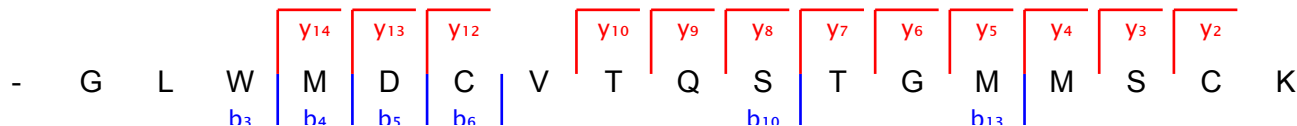

Raw file

20140925\_fract4\_dyn\_5ul\_B4\_01\_439

Scan

3804

Method

TOF; CID

Score

116.37

m/z

438.2

Gene names

SMOC2

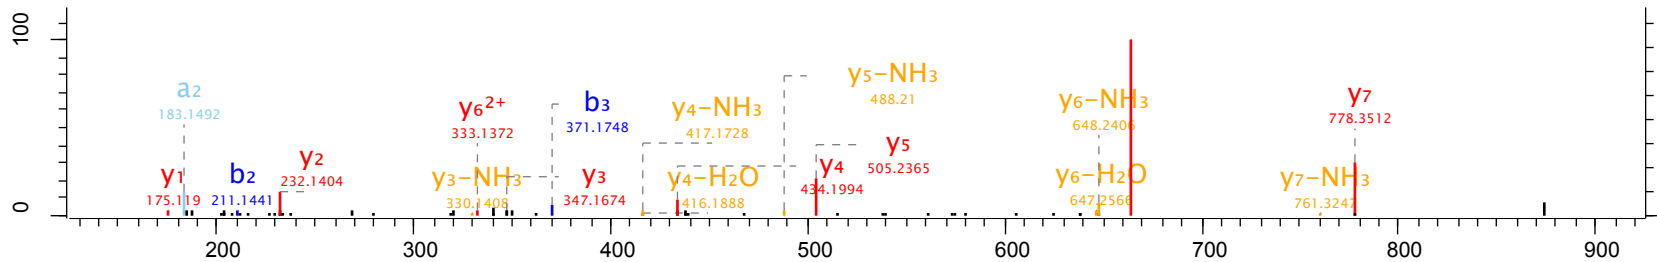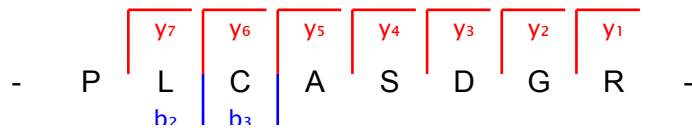

| Raw file                          | Scan  | Method   | Score | m/z    | Gene names       |
|-----------------------------------|-------|----------|-------|--------|------------------|
| 20140925_fract4_dyn_5ul_B4_01_439 | 12557 | TOF; CID | 144.1 | 577.32 | PLEKHG4;CYB561A3 |

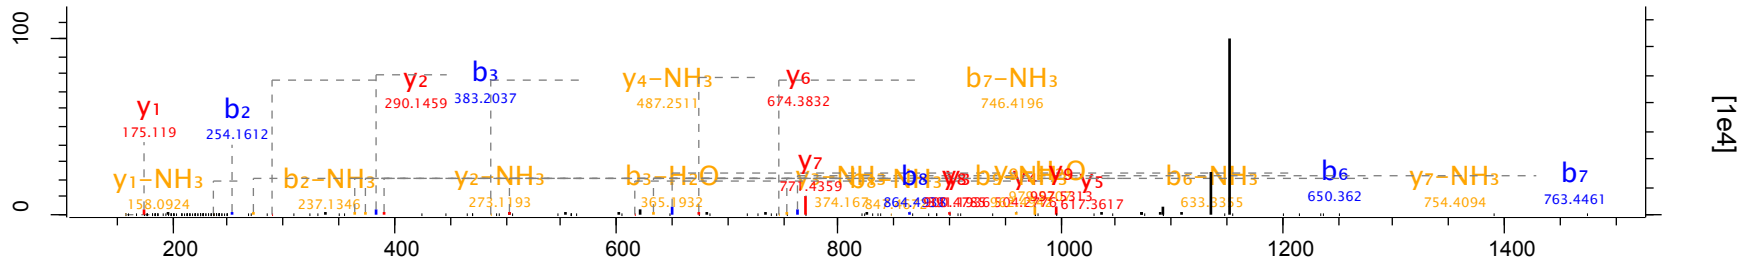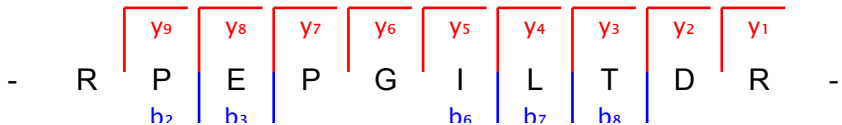



Raw file

20140925\_fract4\_dyn\_5ul\_B4\_01\_439

Scan

15240

Method

TOF; CID

Score

80.32

m/z

634.8

Gene names

MXD1

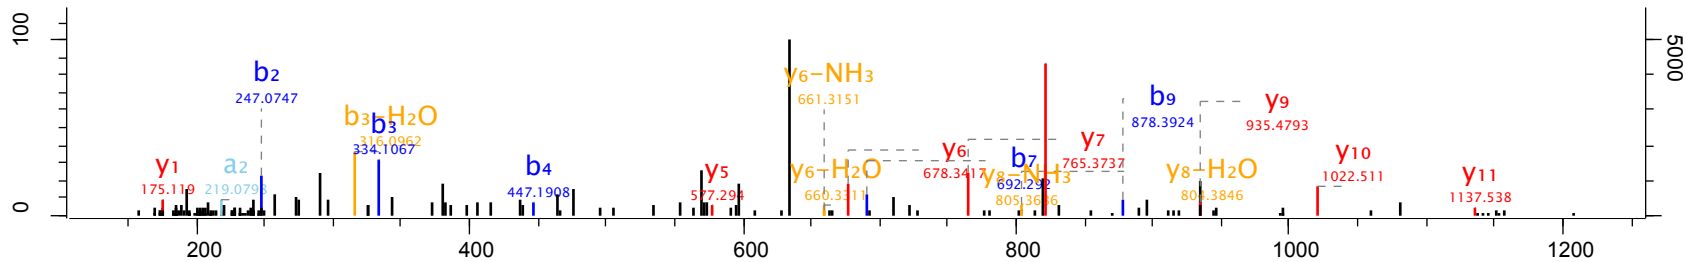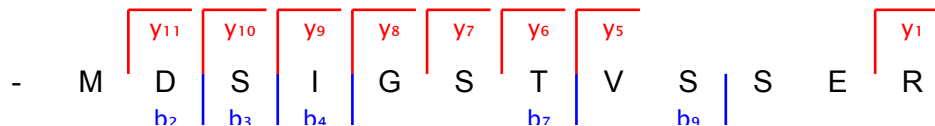

Raw file

Scan

Method

Score

m/z

Gene names

20140925\_fract4\_dyn\_5ul\_B4\_01\_439

17334

TOF; CID

85.81

658.84

ZMYM6NB

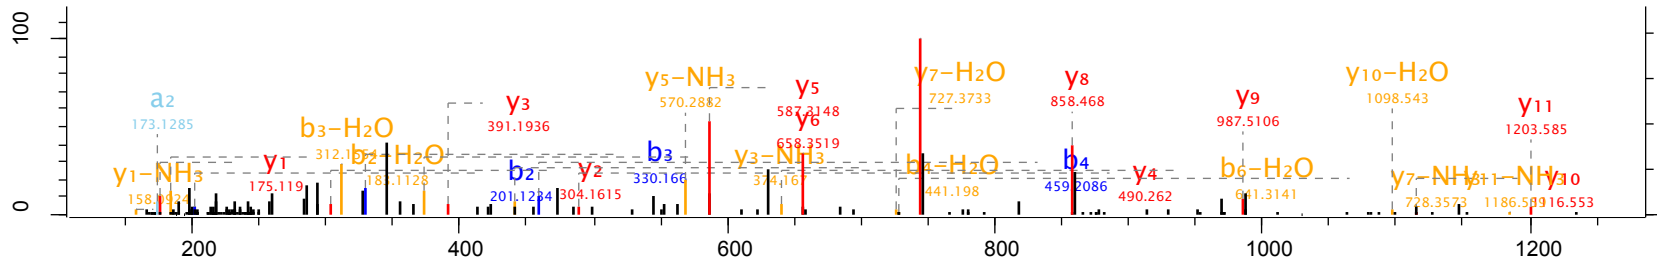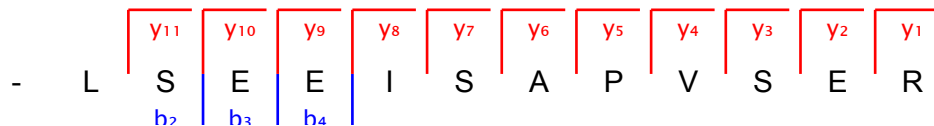

| Raw file                          | Scan  | Method   | Score  | m/z    | Gene names |
|-----------------------------------|-------|----------|--------|--------|------------|
| 20140925_fract4_dyn_5ul_B4_01_439 | 32642 | TOF; CID | 244.37 | 854.42 | SSR3       |

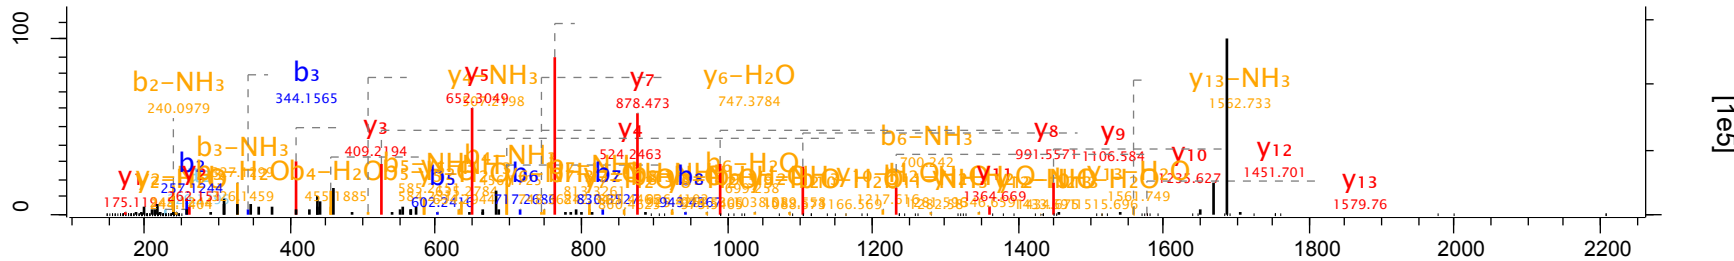

- Q y13 Q y12 S y11 E y10 E y9 D y8 L y7 L y6 L y5 Q y4 D y3 F y2 S y1 R -

b2 b3 b4 b5 b6 b7 b8

Raw file

20140925\_fract4\_dyn\_5ul\_B4\_01\_439

Scan

36201

Method

TOF; CID

Score

65.72

m/z

917.44

Gene names

CNBP

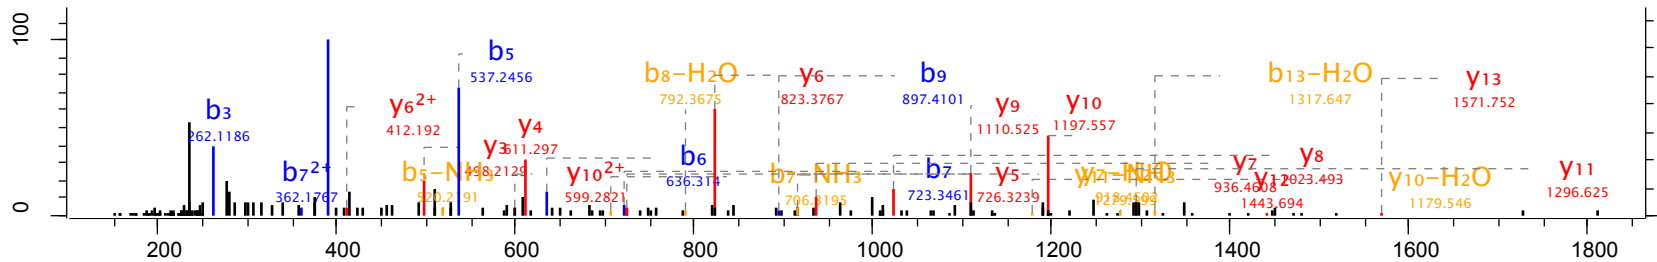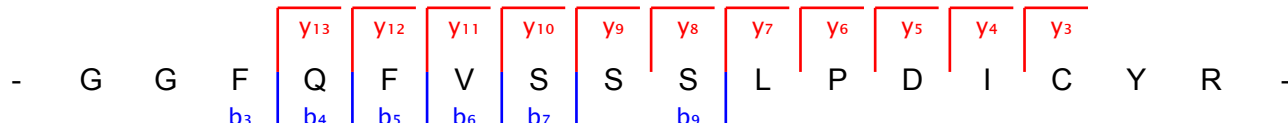

| Raw file                          | Scan  | Method   | Score | m/z    | Gene names |
|-----------------------------------|-------|----------|-------|--------|------------|
| 20140925_fract5_dyn_5ul_B5_01_440 | 10987 | TOF; CID | 94.11 | 408.21 | TMEM187    |

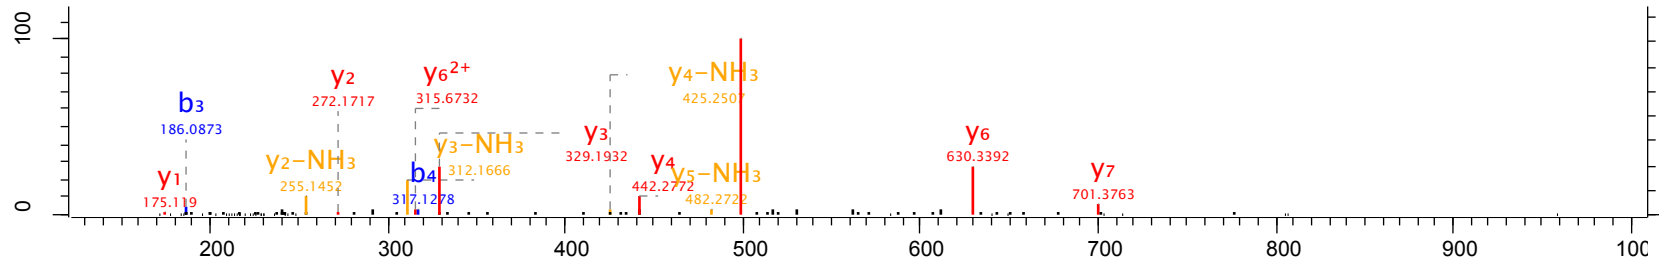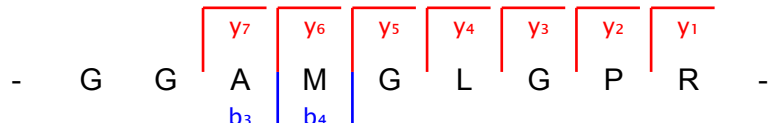

| Raw file                          | Scan  | Method   | Score  | m/z    | Gene names |
|-----------------------------------|-------|----------|--------|--------|------------|
| 20140925_fract5_dyn_5ul_B5_01_440 | 14538 | TOF; CID | 142.43 | 425.86 | CKS1B      |

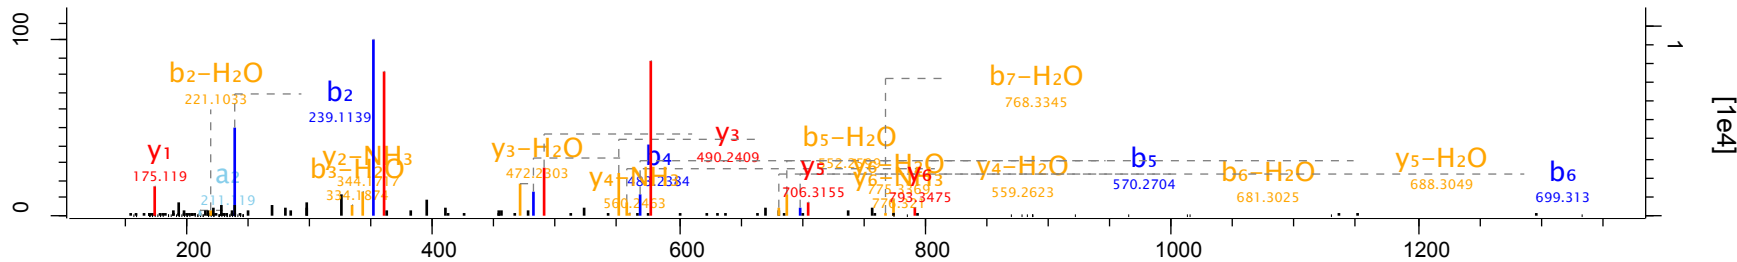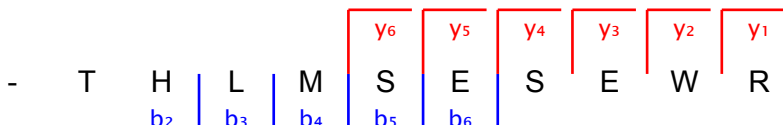

Raw file

20140925\_fract5\_dyn\_5ul\_B5\_01\_440

Scan

29617

Method

TOF; CID

Score

58.89

m/z

687.86

Gene names

FAM89B

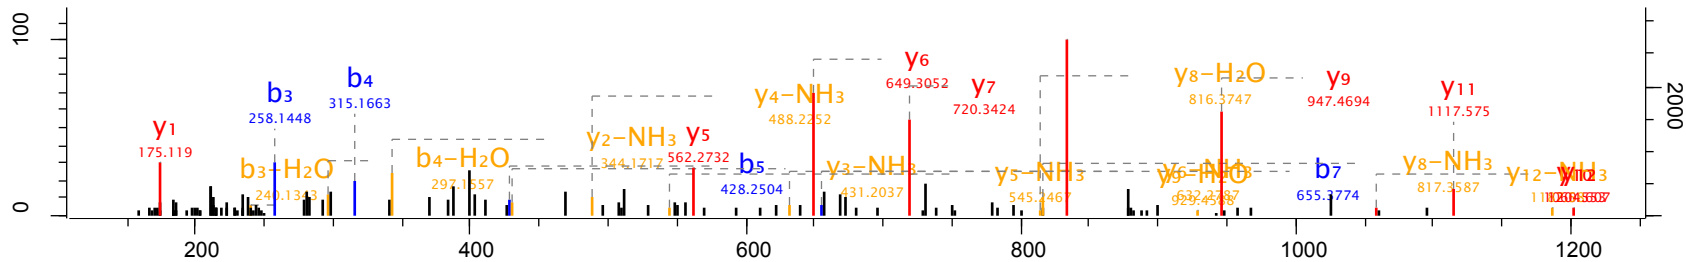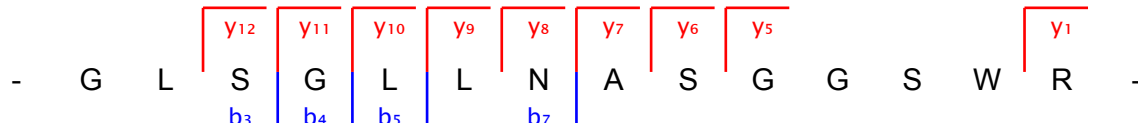

| Raw file                          | Scan  | Method   | Score | m/z    | Gene names |
|-----------------------------------|-------|----------|-------|--------|------------|
| 20140925_fract5_dyn_5ul_B5_01_440 | 34064 | TOF; CID | 117.7 | 576.85 | SPIN4      |

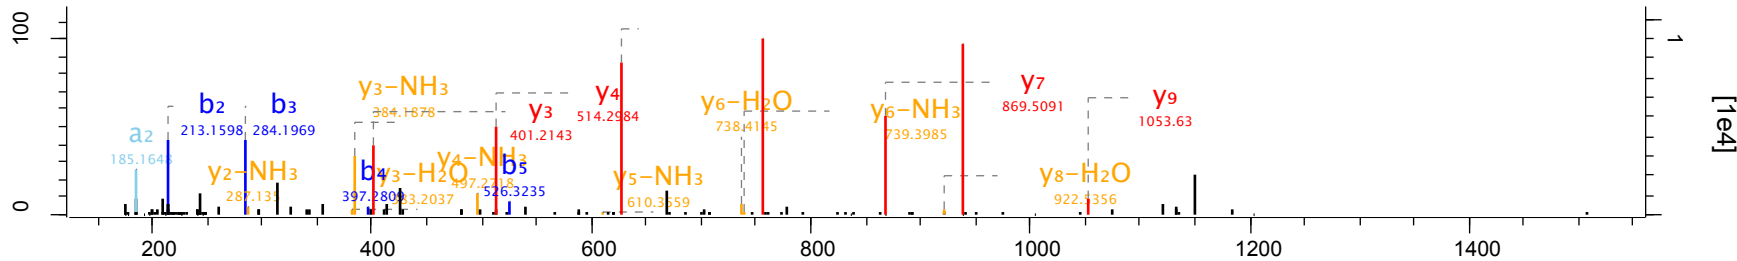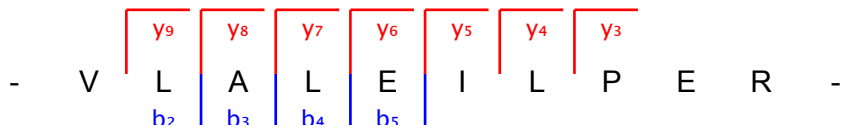



Raw file

20140925\_fract6\_dyn\_5ul\_B6\_01\_441

Scan

10157

Method

TOF; CID

Score

118.76

m/z

617.32

Gene names

HDGFRP2

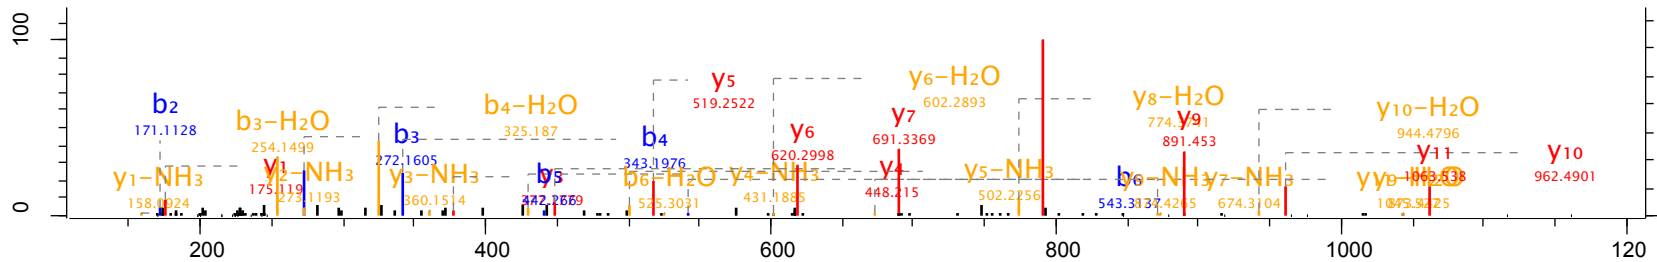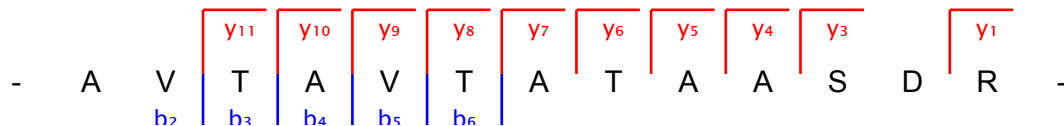

Raw file

20140925\_fract6\_dyn\_5ul\_B6\_01\_441

Scan

22628

Method

TOF; CID

Score

86.8

m/z

461.23

Gene names

ZKSCAN5

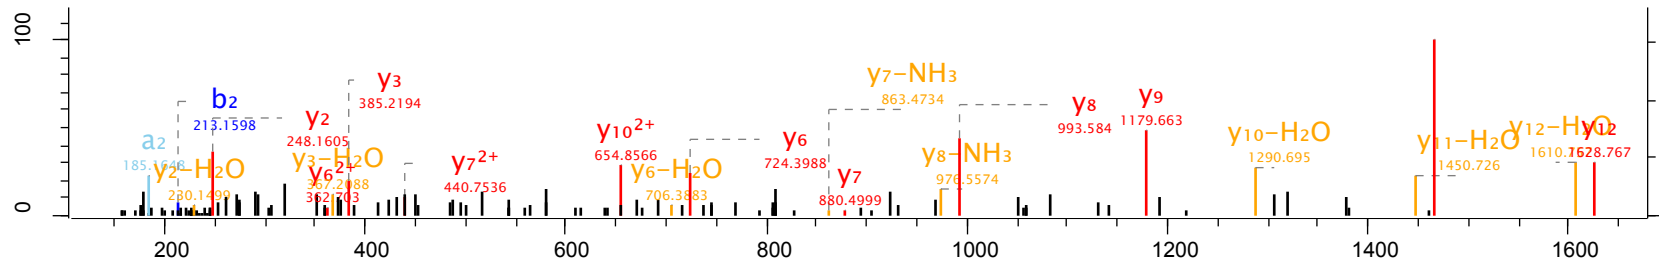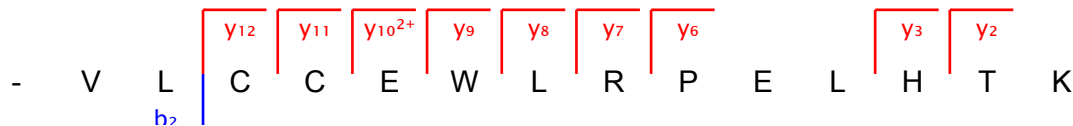

Raw file

20140925\_fract6\_dyn\_5ul\_B6\_01\_441

Scan

26604

Method

TOF; CID

Score

73.83

m/z

556.29

Gene names

FAM210B

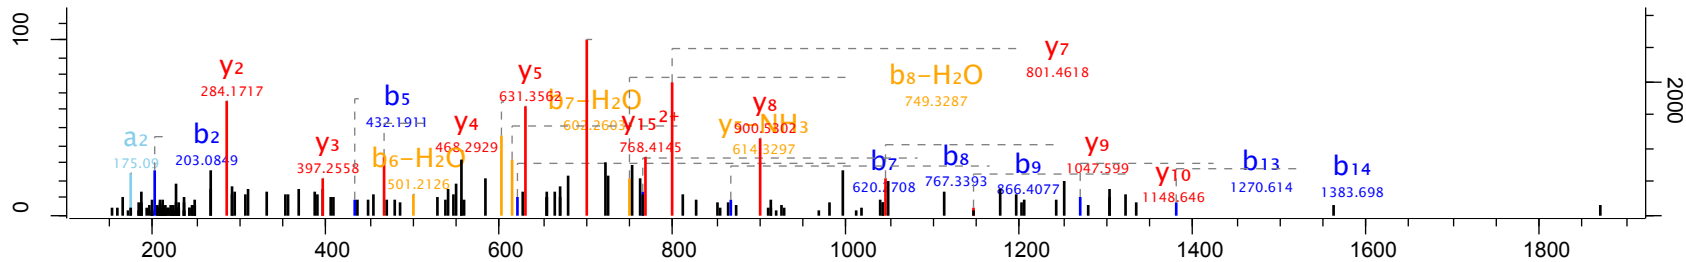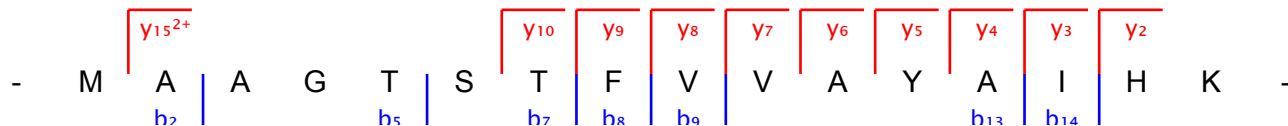

| Raw file                          | Scan  | Method   | Score | m/z    | Gene names |
|-----------------------------------|-------|----------|-------|--------|------------|
| 20140925_fract6_dyn_5ul_B6_01_441 | 29925 | TOF; CID | 67.23 | 725.03 | UBALD2     |

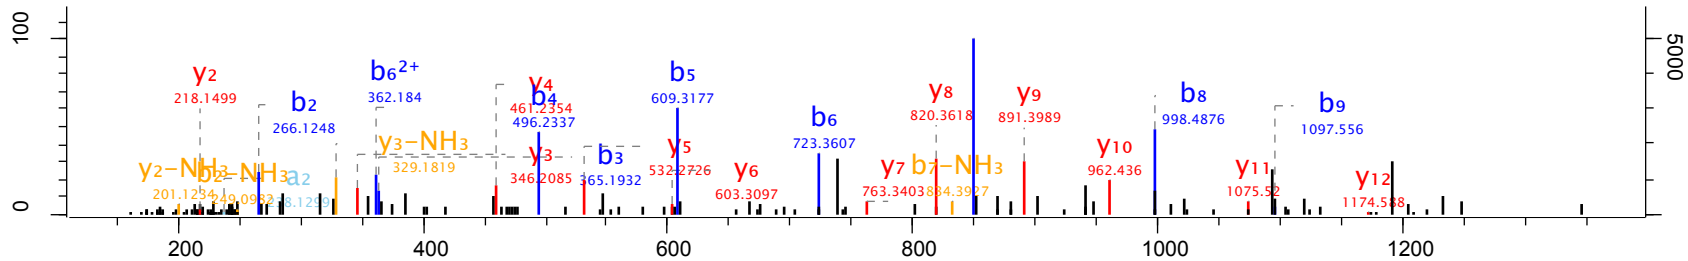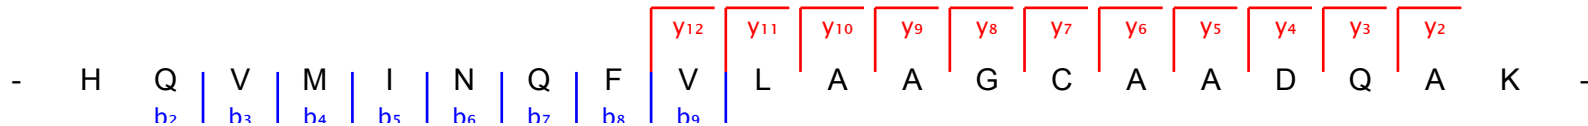

Raw file

20140925\_fract6\_dyn\_5ul\_B6\_01\_441

Scan

34441

Method

TOF; CID

Score

60.54

m/z

866.47

Gene names

TTC32

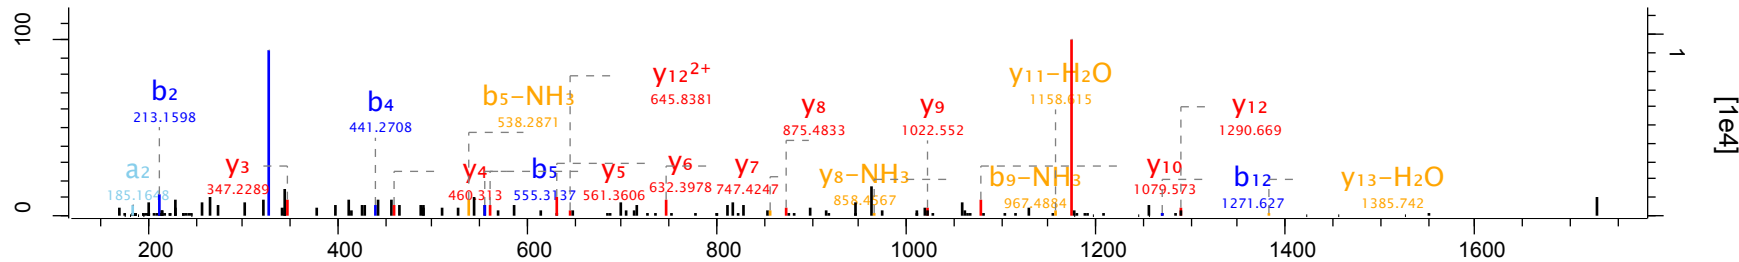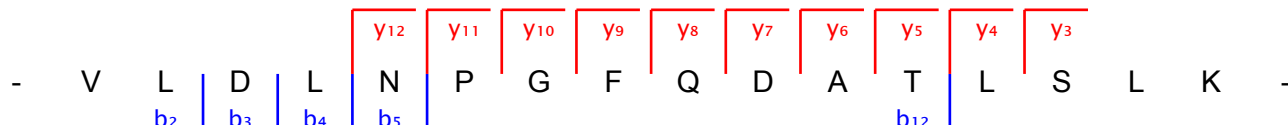

Raw file

Scan

Method

Score

m/z

Gene names

20140925\_fract7\_dyn\_5ul\_B7\_01\_442

11706

TOF; CID

66.15

690.34

DMTF1

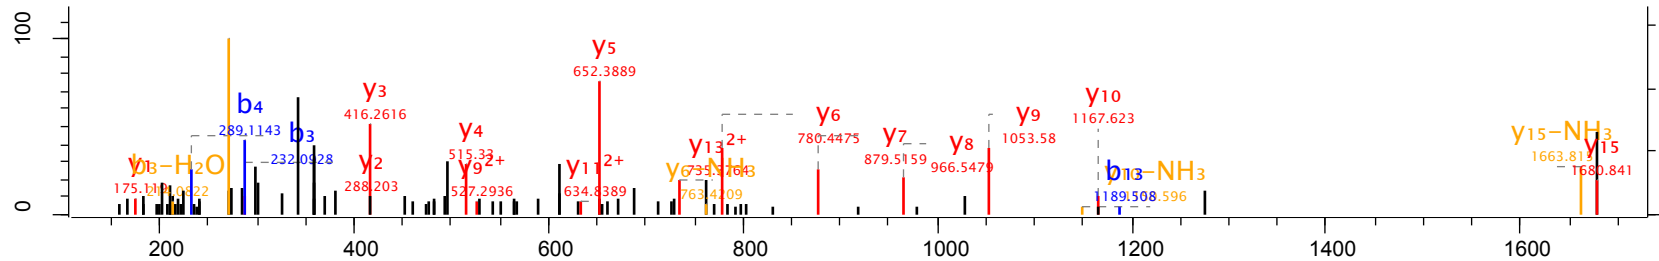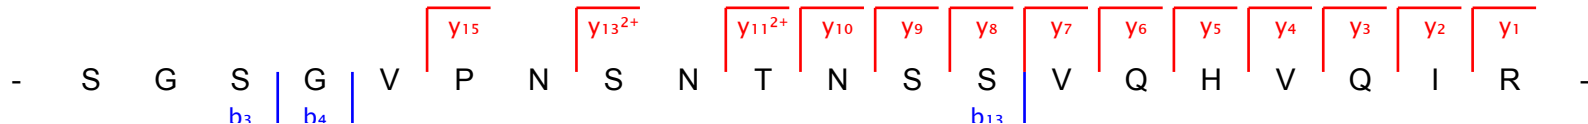

| Raw file                          | Scan  | Method   | Score | m/z   | Gene names |
|-----------------------------------|-------|----------|-------|-------|------------|
| 20140925_fract7_dyn_5ul_B7_01_442 | 17433 | TOF; CID | 49.93 | 452.9 | UBXN2A     |

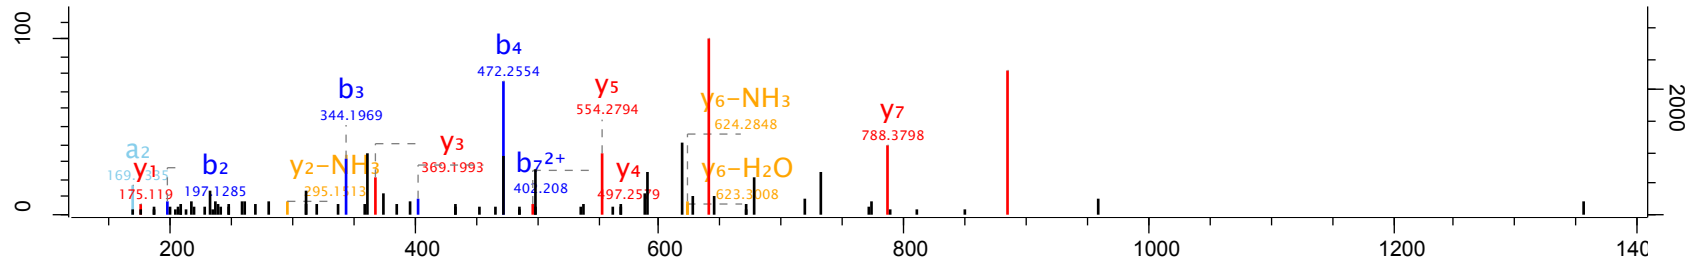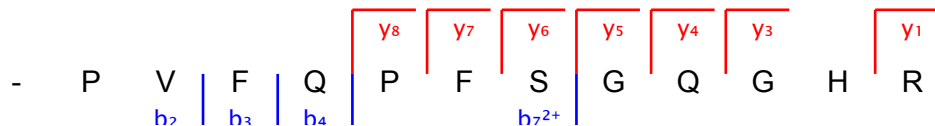

| Raw file                          | Scan  | Method   | Score | m/z    | Gene names |
|-----------------------------------|-------|----------|-------|--------|------------|
| 20140925_fract7_dyn_5ul_B7_01_442 | 19373 | TOF; CID | 42.71 | 678.33 | ODF2L      |

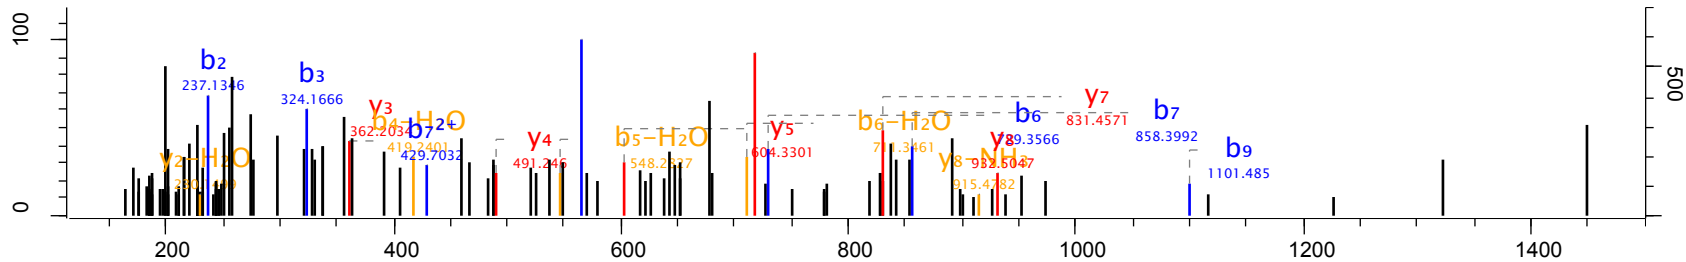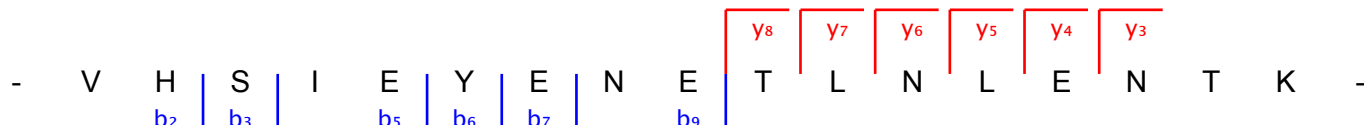



Raw file

20140925\_fract7\_dyn\_5ul\_B7\_01\_442

Scan

23880

Method

TOF; CID

Score

105.53

m/z

617.97

Gene names

HNRNPH1

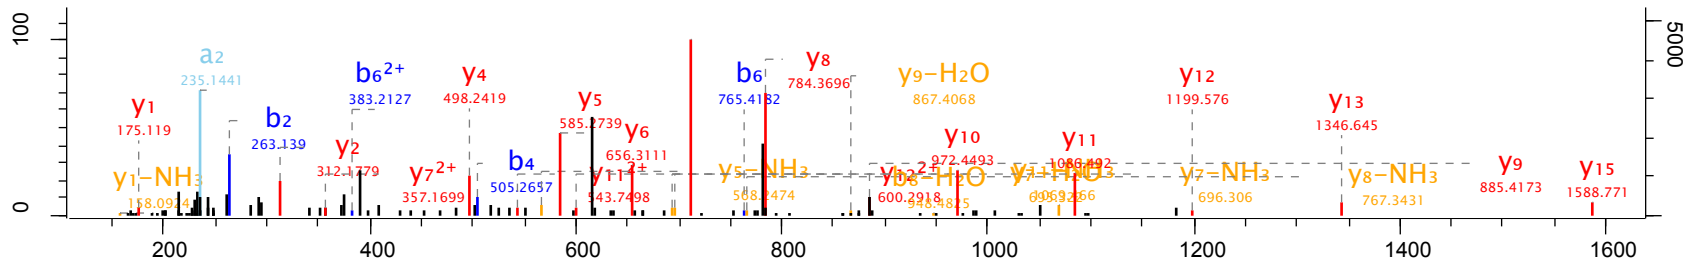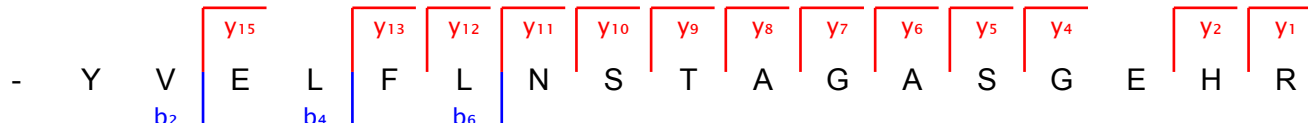

Raw file

20140925\_fract7\_dyn\_5ul\_B7\_01\_442

Scan

24744

Method

TOF; CID

Score

105.98

m/z

603.31

Gene names

TAF13

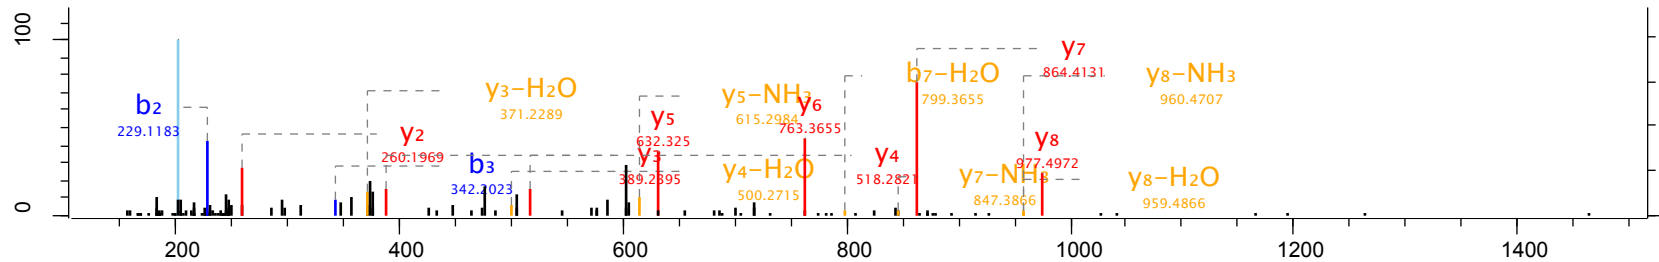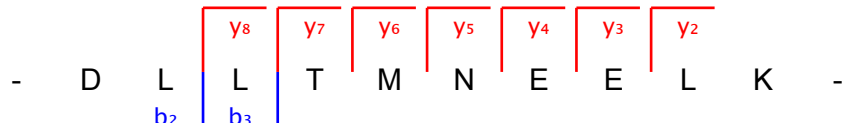

Raw file

20140925\_fract8\_dyn\_5ul\_B8\_01\_443

Scan

5102

Method

TOF; CID

Score

79.47

m/z

313.85

Gene names

ZNF212

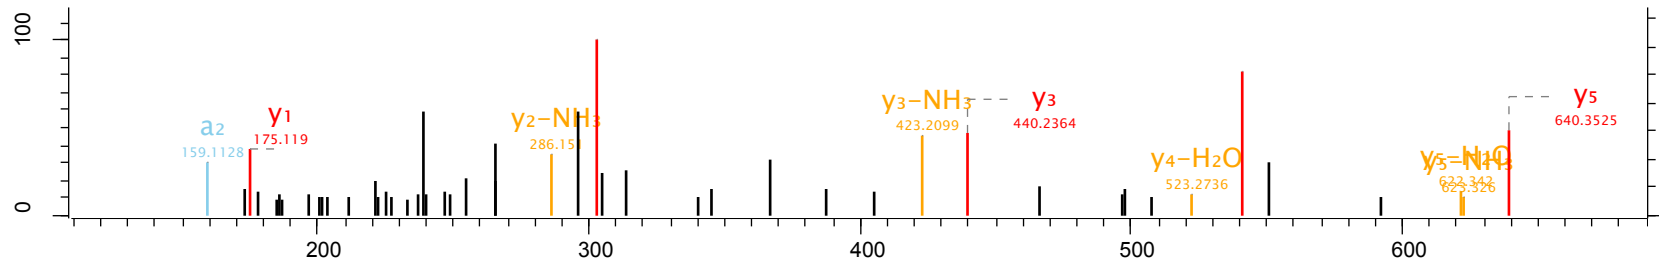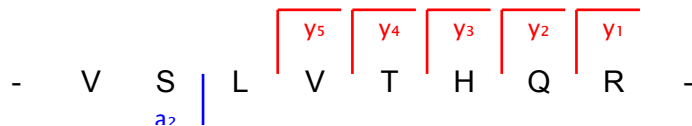

Raw file

20140925\_fract8\_dyn\_5ul\_B8\_01\_443

Scan

9549

Method

TOF; CID

Score

103.26

m/z

574.32

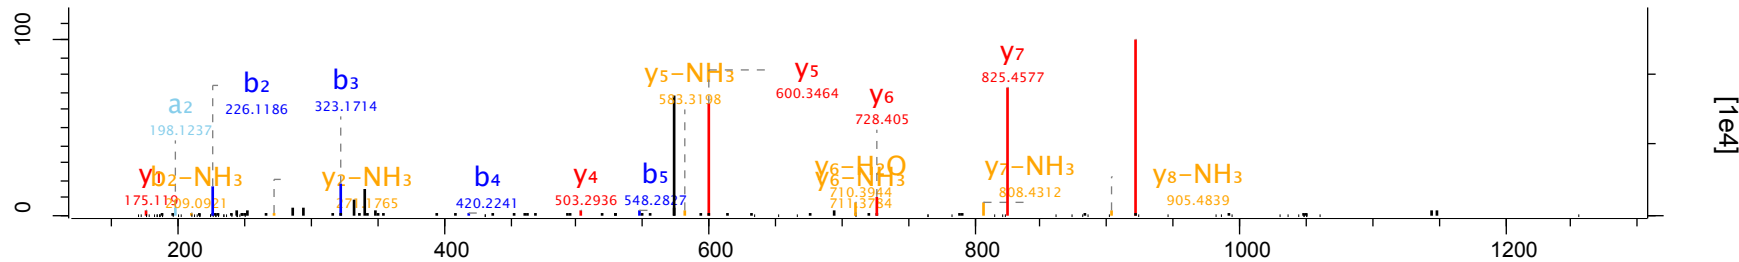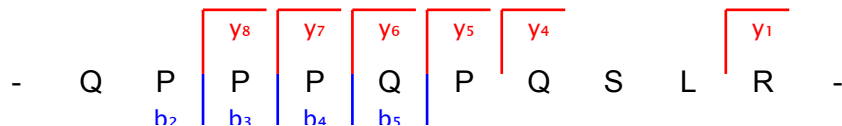

Raw file

20140925\_fract8\_dyn\_5ul\_B8\_01\_443

Scan

12927

Method

TOF; CID

Score

79.12

m/z

339.16

Gene names

AQP3

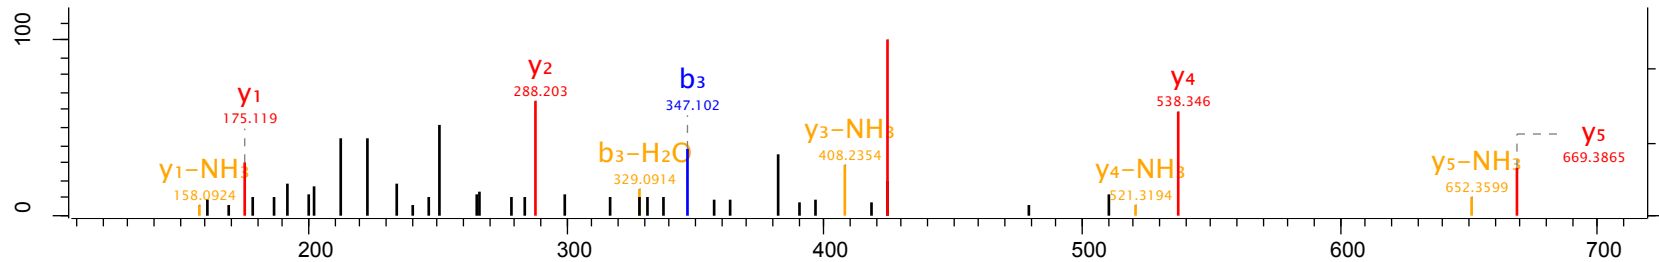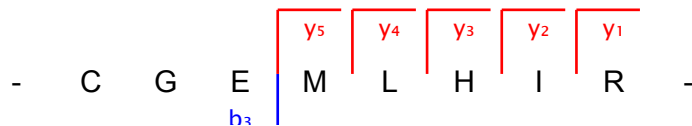

| Raw file                          | Scan  | Method   | Score | m/z    | Gene names |
|-----------------------------------|-------|----------|-------|--------|------------|
| 20140925_fract8_dyn_5ul_B8_01_443 | 13166 | TOF; CID | 97.73 | 578.79 | TMEM254    |

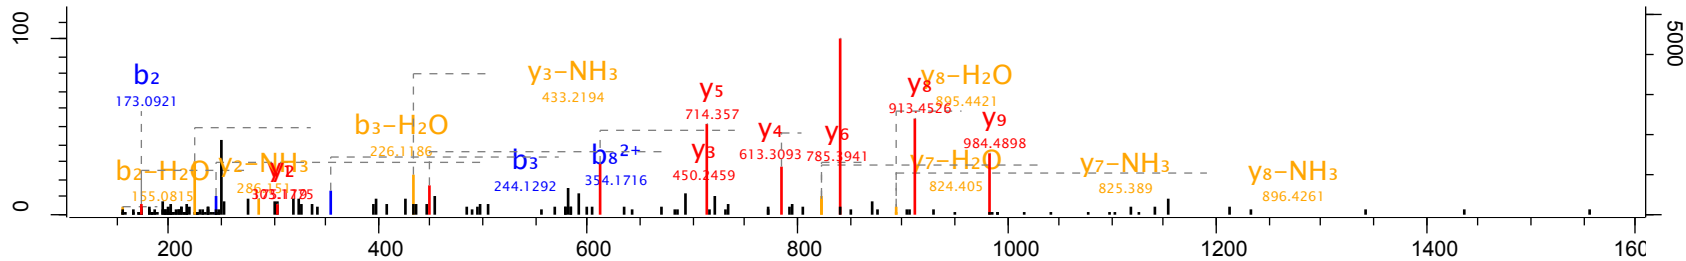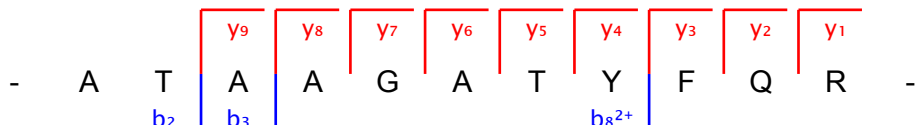

Raw file

20140925\_fract8\_dyn\_5ul\_B8\_01\_443

Scan

14497

Method

TOF; CID

Score

107.82

m/z

874.92

Gene names

TMEM181

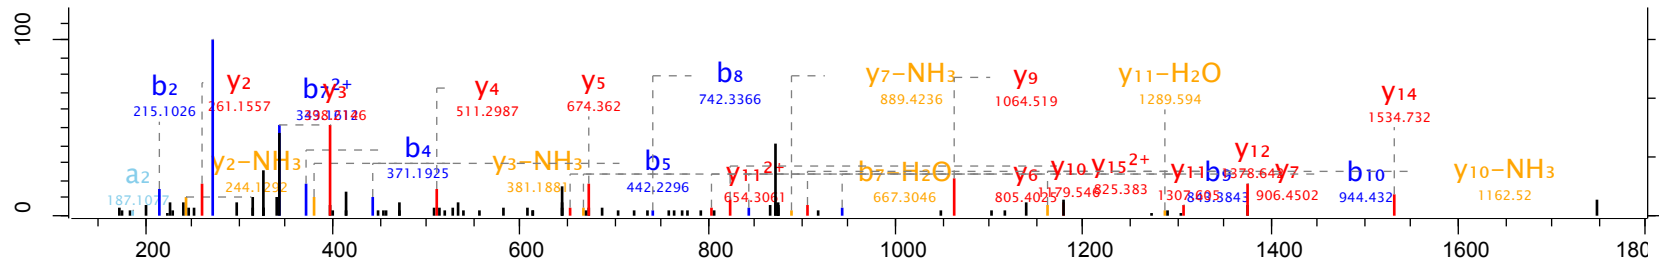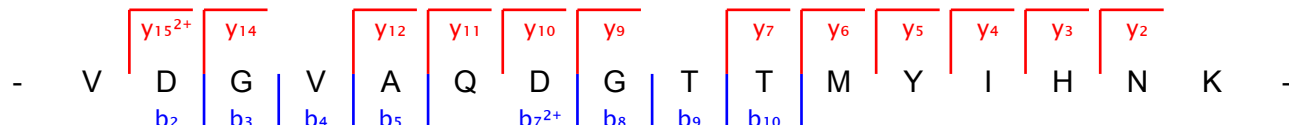

| Raw file                          | Scan  | Method   | Score | m/z    | Gene names |
|-----------------------------------|-------|----------|-------|--------|------------|
| 20140925_fract8_dyn_5ul_B8_01_443 | 23826 | TOF; CID | 45.42 | 798.38 | ATXN7L2    |

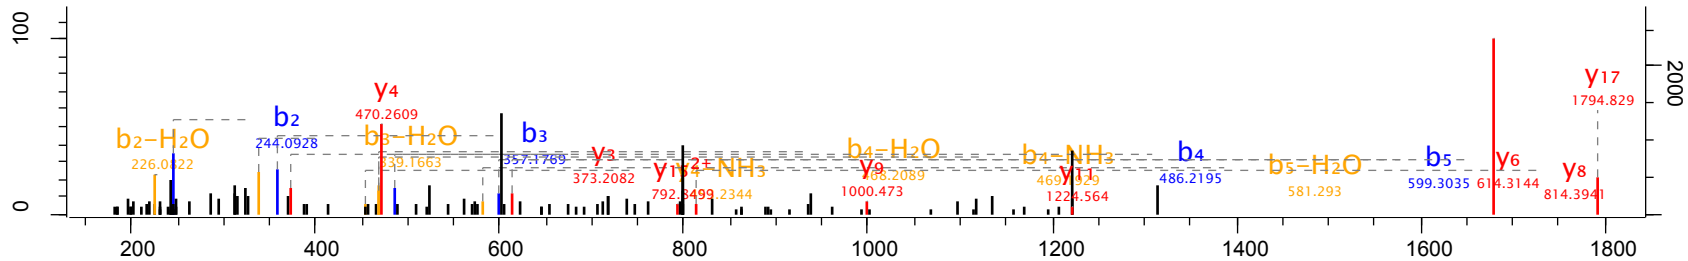

- E N I E I I P S E G S S H W A E G S P P E  
   b<sub>2</sub> b<sub>3</sub> b<sub>4</sub> b<sub>5</sub> y<sub>17</sub> y<sub>16</sub> y<sub>15</sub><sup>2+</sup> y<sub>11</sub> y<sub>9</sub> y<sub>8</sub> y<sub>6</sub> y<sub>4</sub> y<sub>3</sub>



Raw file

20140925\_fract8\_dyn\_5ul\_B8\_01\_443

Scan

24478

Method

TOF; CID

Score

75.82

m/z

658.85

Gene names

PLAC1

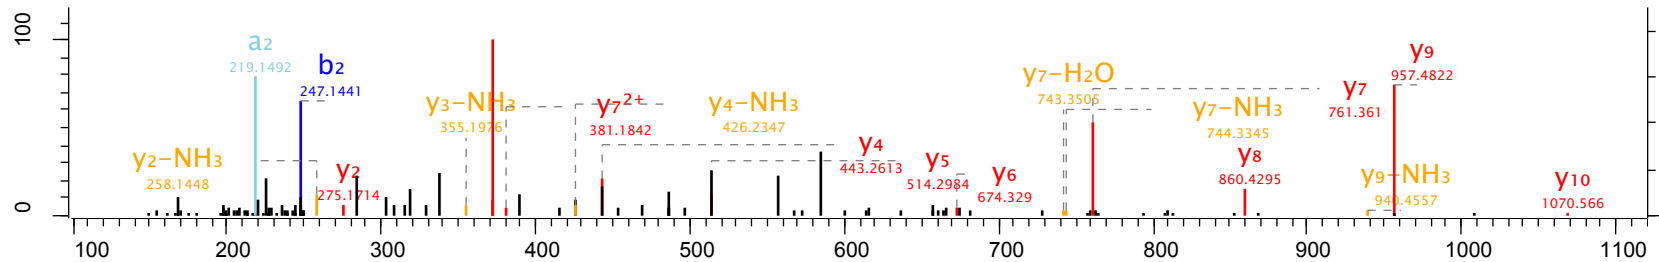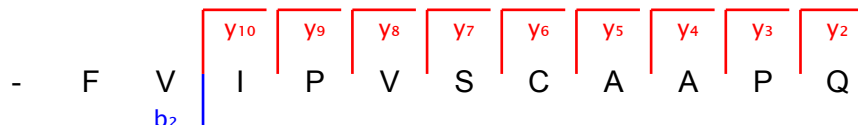

Raw file

20140925\_fract8\_dyn\_5ul\_B8\_01\_443

Scan

30412

Method

TOF; CID

Score

64.27

m/z

869.43

Gene names

MFSD8

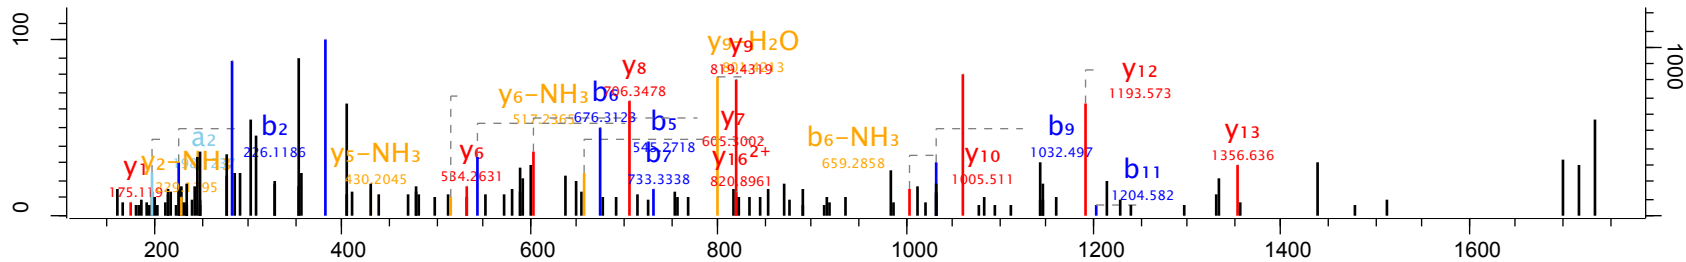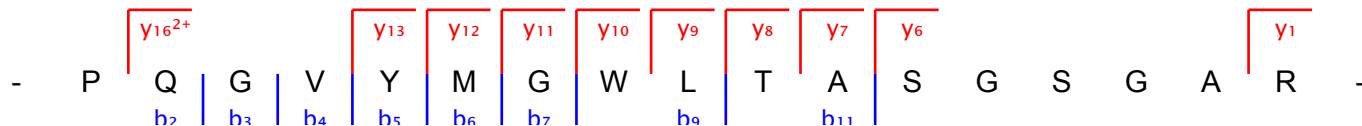

| Raw file                          | Scan | Method   | Score | m/z    | Gene names |
|-----------------------------------|------|----------|-------|--------|------------|
| 20140925_fract9_dyn_5ul_C1_01_444 | 3856 | TOF; CID | 59.23 | 453.58 | SPOCK1     |

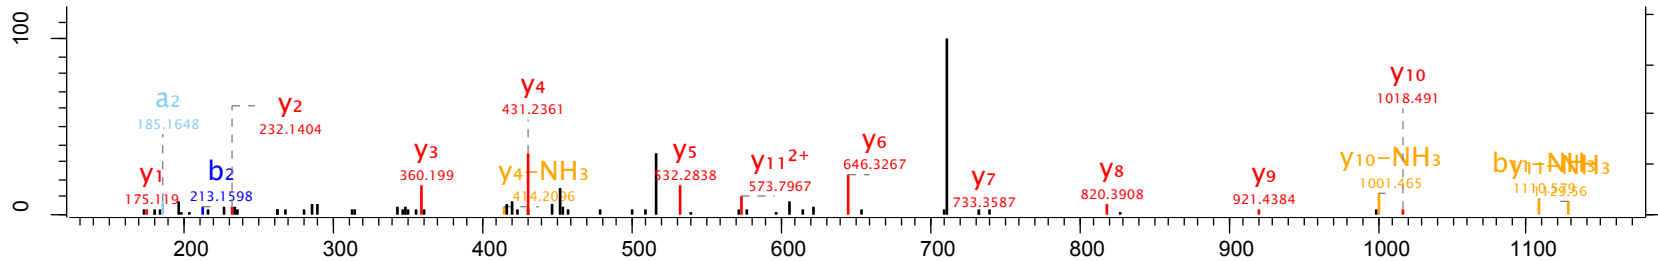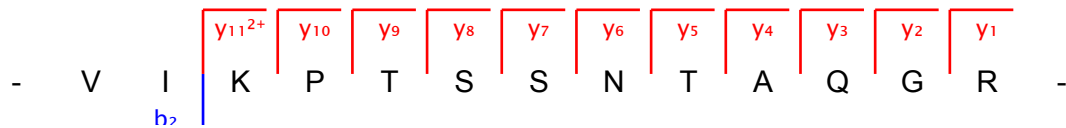

Raw file

20140925\_fract9\_dyn\_5ul\_C1\_01\_444

Scan

25470

Method

TOF; CID

Score

65.37

m/z

749.36

Gene names

MT-ND6

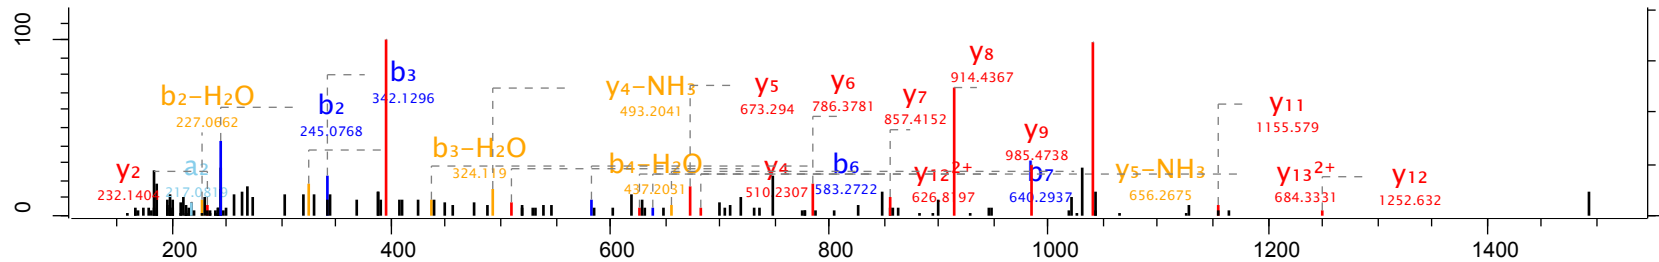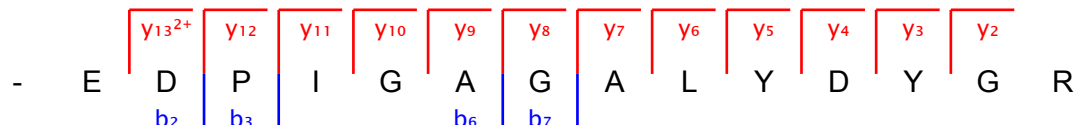

Raw file

20140925\_fract9\_dyn\_5ul\_C1\_01\_444

Scan

29165

Method

TOF; CID

Score

87.36

m/z

1207.54

Gene names

CMTM4

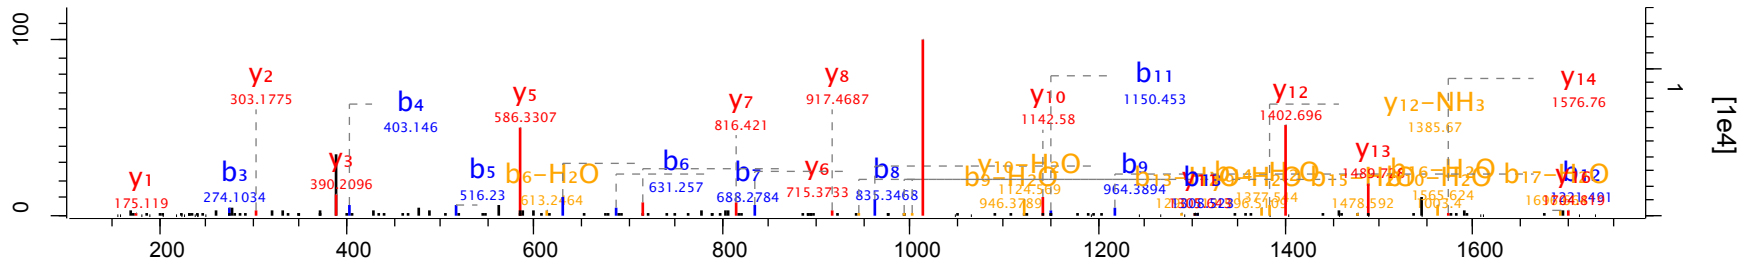

- S G E | E | L | D | G | F | E | G E | A | S | S T S M I S G A

h<sub>3</sub> | h<sub>4</sub> | h<sub>5</sub> | h<sub>6</sub> | h<sub>7</sub> | h<sub>8</sub> | h<sub>9</sub> | h<sub>11</sub> | h<sub>12</sub> | h<sub>13</sub>

| Raw file                          | Scan  | Method   | Score  | m/z     | Gene names |
|-----------------------------------|-------|----------|--------|---------|------------|
| 20140925_fract9_dyn_5ul_C1_01_444 | 37645 | TOF; CID | 104.88 | 1065.55 | KDELRL1    |

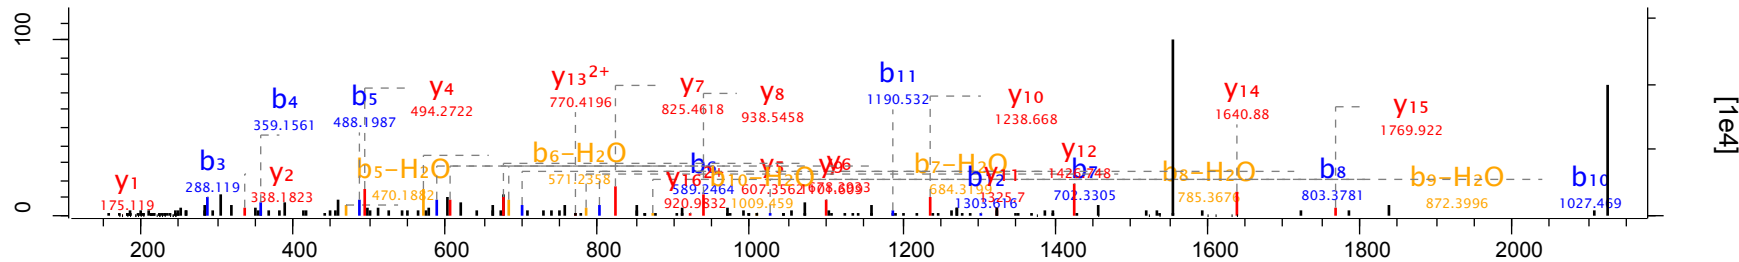

- T G E A E T I T S H Y L F A L G V Y R -

Fragmentation scheme showing amino acid sequence and corresponding b and y ions:

- Red brackets above the sequence indicate y ions: y16<sup>2+</sup>, y15, y14, y13<sup>2+</sup>, y12, y11, y10, y9, y8, y7, y6, y5, y4, y2, y1.
- Blue brackets below the sequence indicate b ions: b3, b4, b5, b6, b7, b8, b10, b11, b12.

| Raw file                          | Scan  | Method   | Score | m/z     | Gene names |
|-----------------------------------|-------|----------|-------|---------|------------|
| 20140925_fract9_dyn_5ul_C1_01_444 | 37770 | TOF; CID | 79.84 | 1017.54 | ZFAND2B    |

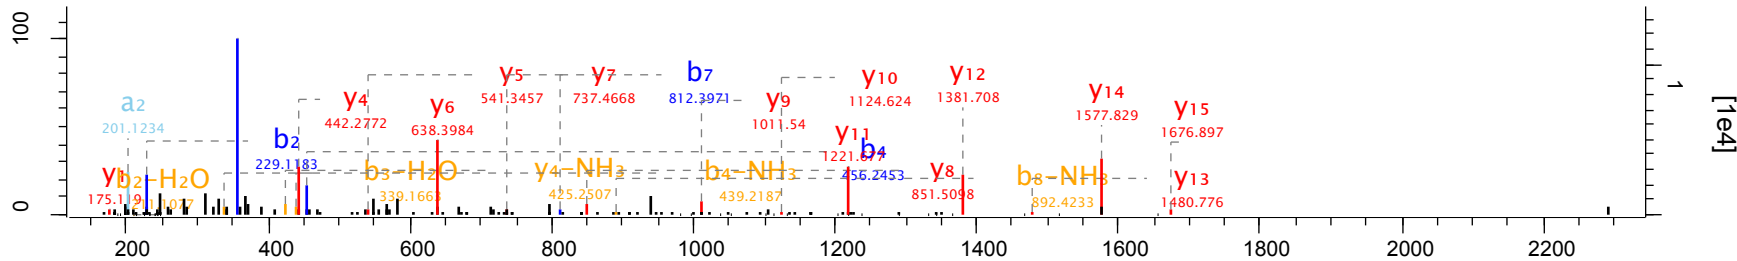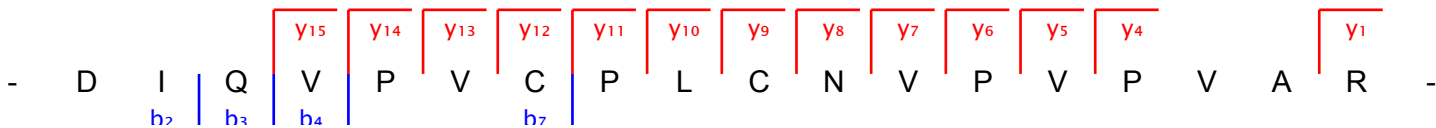

Raw file

20140925\_fract9\_dyn\_5ul\_C1\_01\_444

Scan

38245

Method

TOF; CID

Score

49.83

m/z

969.45

Gene names

CDC42SE1

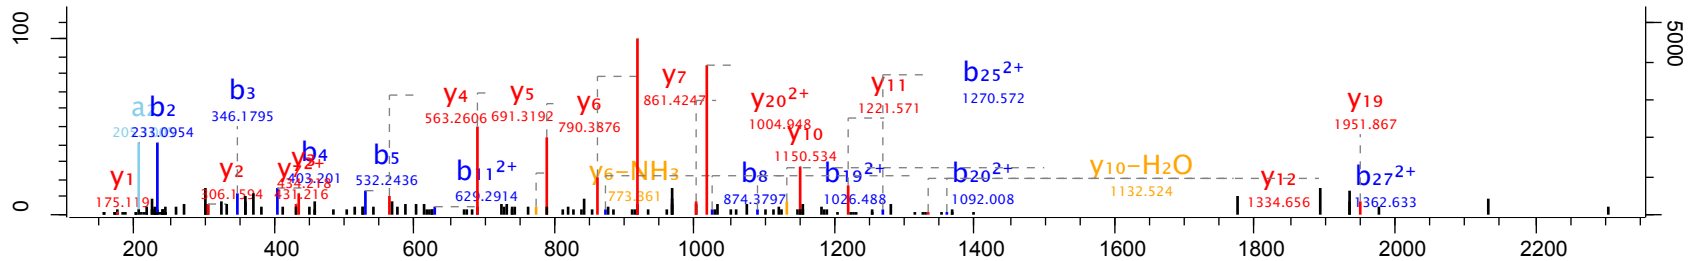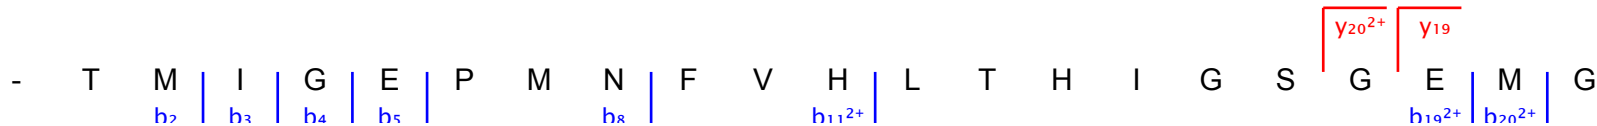



Raw file

Scan

Method

Score

m/z

Gene names

20140925\_fract10\_dyn\_5ul\_C2\_01\_445

6793

TOF; CID

196.27

446.23

NINJ1

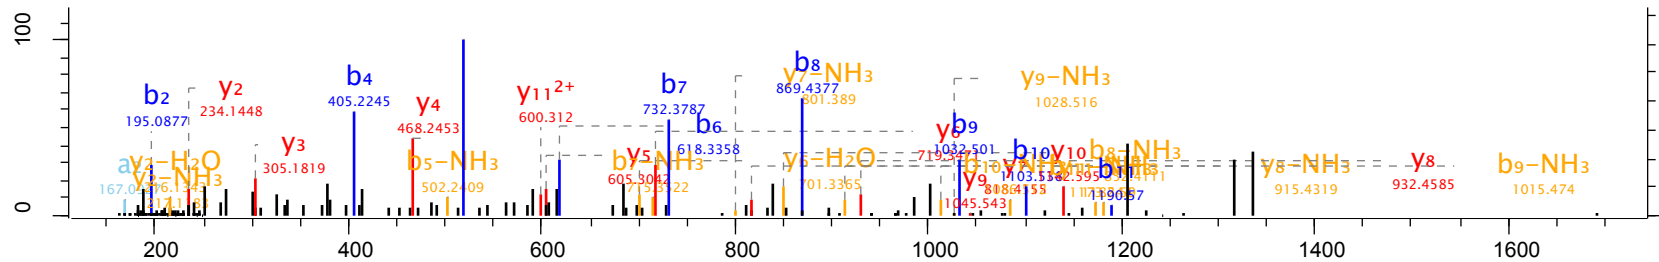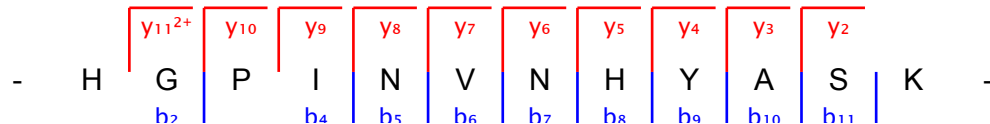

| Raw file                           | Scan  | Method   | Score | m/z    | Gene names |
|------------------------------------|-------|----------|-------|--------|------------|
| 20140925_fract10_dyn_5ul_C2_01_445 | 12153 | TOF; CID | 93.6  | 529.32 | RPGRIP1    |

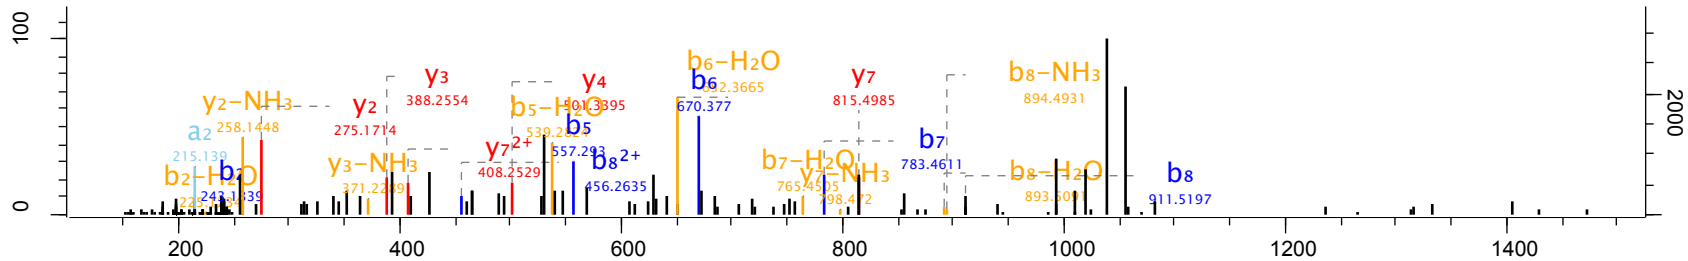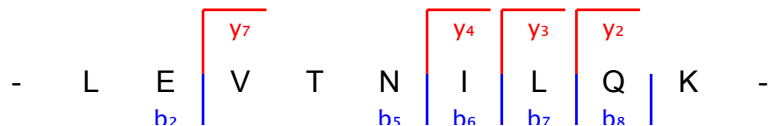

Raw file

20140925\_fract10\_dyn\_5ul\_C2\_01\_445

Scan

33269

Method

TOF; CID

Score

147.62

m/z

629.83

Gene names

GTF2A1;HIST1H4F

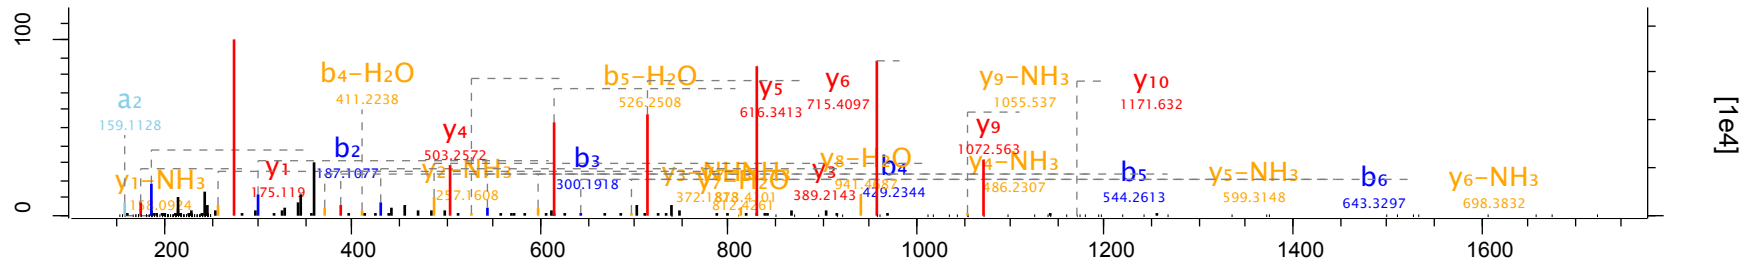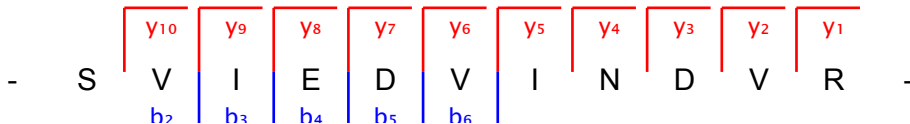

Raw file

20140925\_fract10\_dyn\_5ul\_C2\_01\_445

Scan

40949

Method

TOF; CID

Score

106.28

m/z

1099.53

Gene names

CNIH1

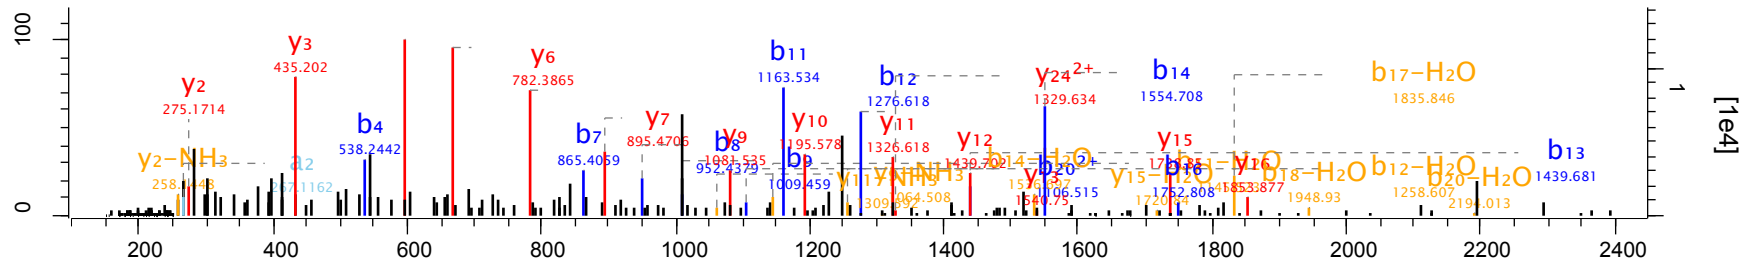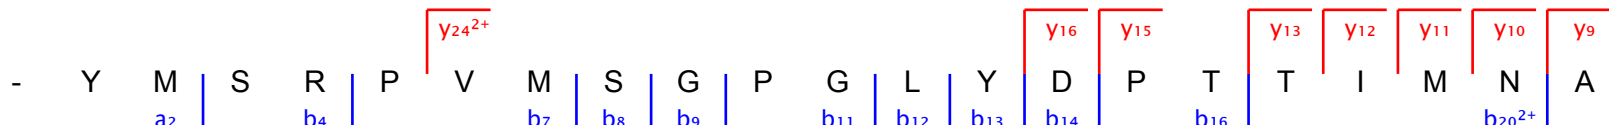

Raw file

Scan

Method

Score

m/z

Gene names

20140925\_fract11\_dyn\_5ul\_C3\_01\_446

16053

TOF; CID

168.85

617.83

SUMO2;SUMO3;SUMO4

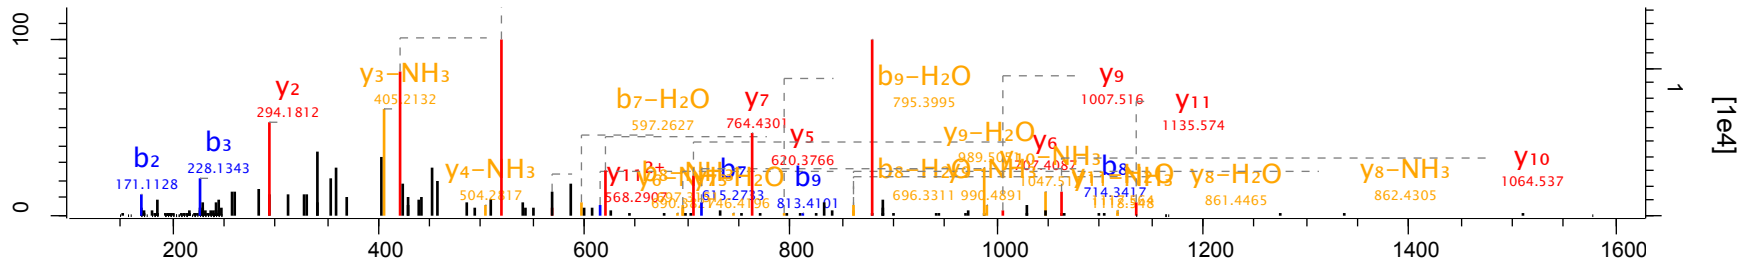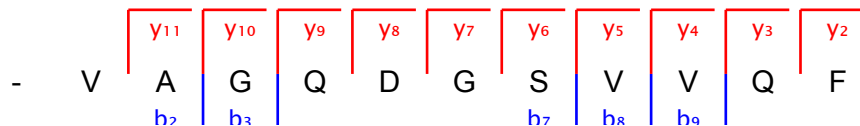

Raw file

20140925\_fract11\_dyn\_5ul\_C3\_01\_446

Scan

28160

Method

TOF; CID

Score

90.71

m/z

597.99

Gene names

DGCR2

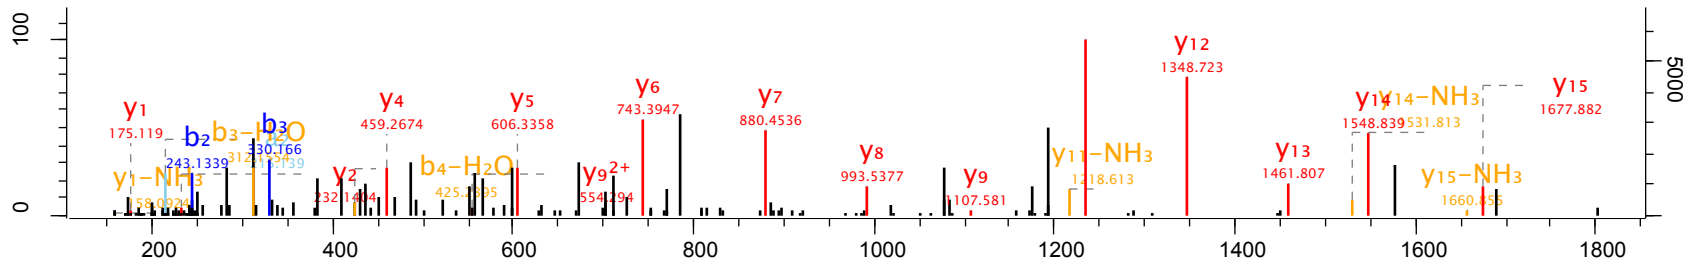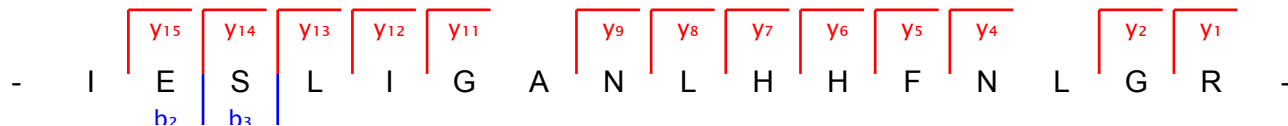

| Raw file                           | Scan  | Method   | Score  | m/z    | Gene names |
|------------------------------------|-------|----------|--------|--------|------------|
| 20140925_fract11_dyn_5ul_C3_01_446 | 29914 | TOF; CID | 114.97 | 623.38 | MT-ATP6    |

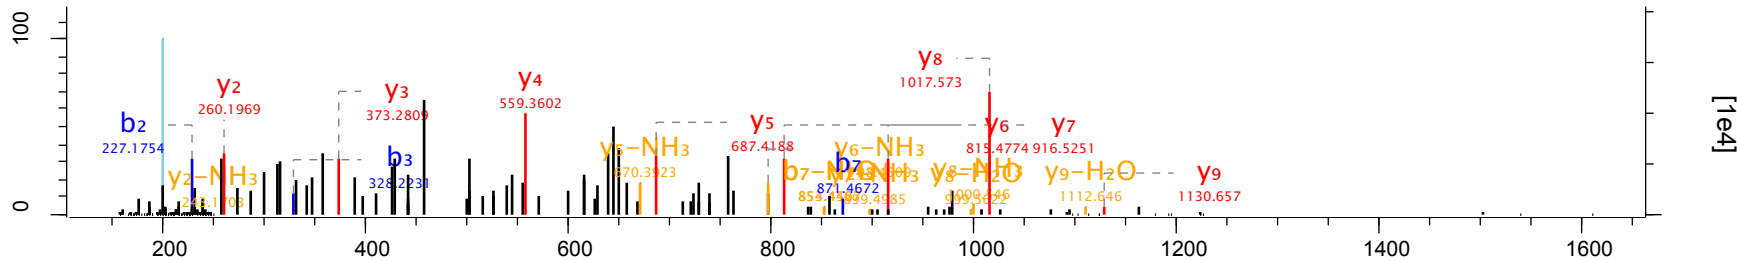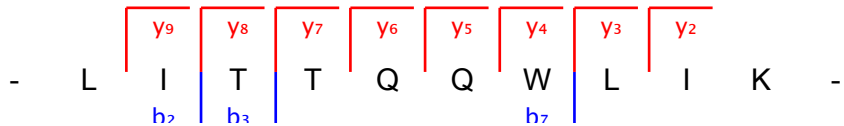

Raw file

20140925\_fract12\_dyn\_5ul\_C4\_01\_447

Scan

10892

Method

TOF; CID

Score

67.38

m/z

543.8

Gene names

SLC26A11

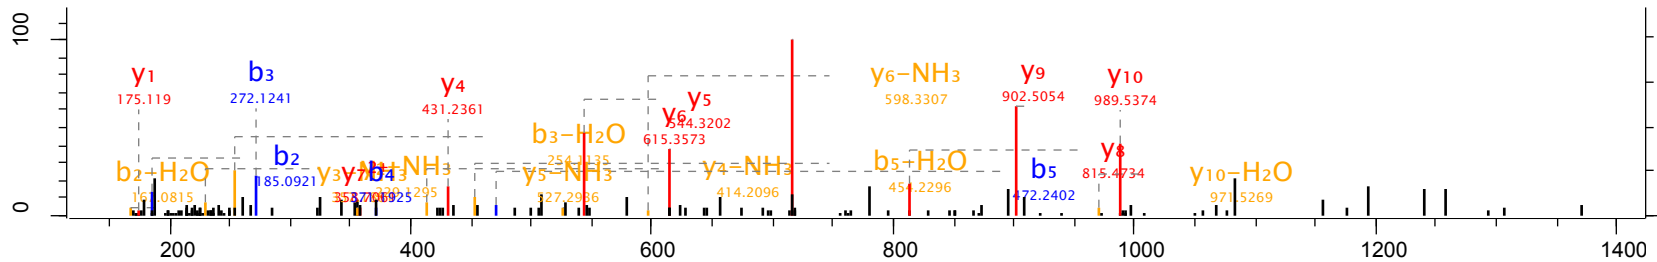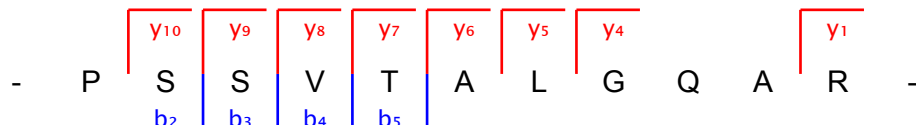



Raw file

20140925\_fract13\_dyn\_5ul\_C5\_01\_448

Scan

8066

Method

TOF; CID

Score

107.65

m/z

463.92

Gene names

ARNTL2

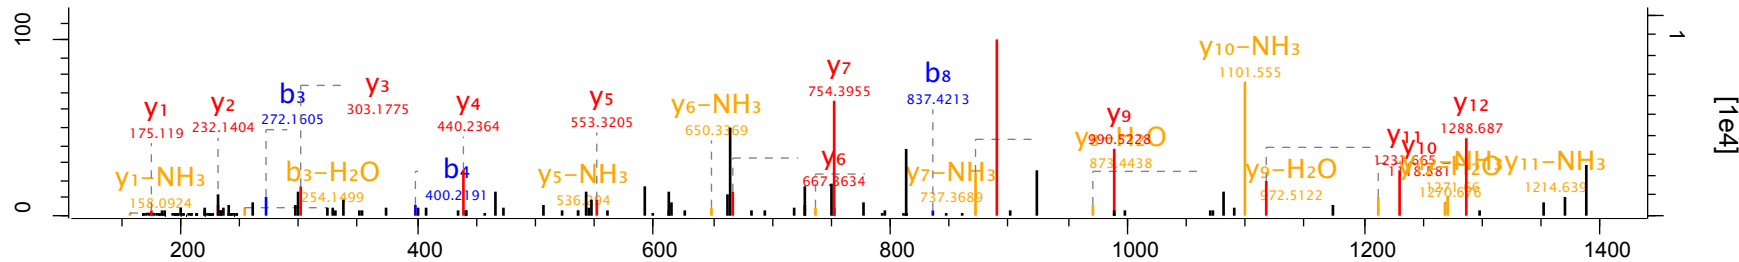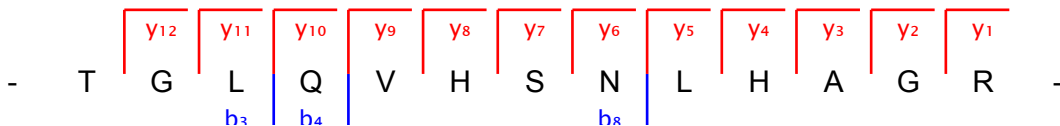

Raw file

Scan

Method

Score

m/z

Gene names

20140925\_fract13\_dyn\_5ul\_C5\_01\_448

22877

TOF; CID

73.39

767.89

PREP

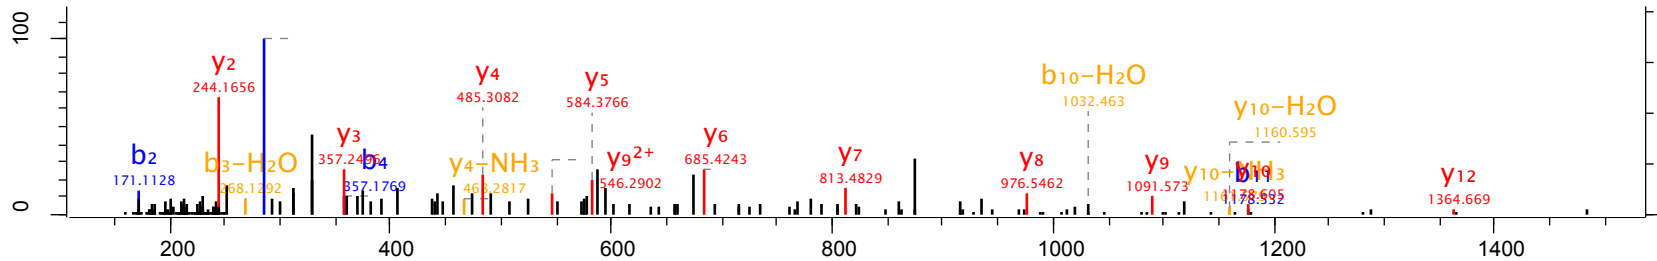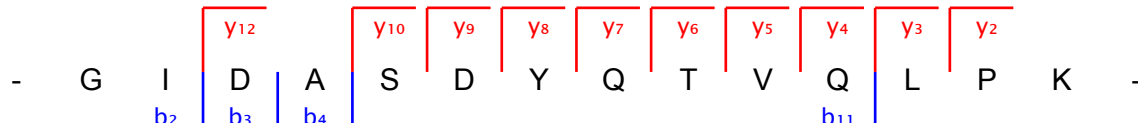

Raw file

20140925\_fract13\_dyn\_5ul\_C5\_01\_448

Scan

23106

Method

TOF; CID

Score

56.37

m/z

773.85

Gene names

TM2D2

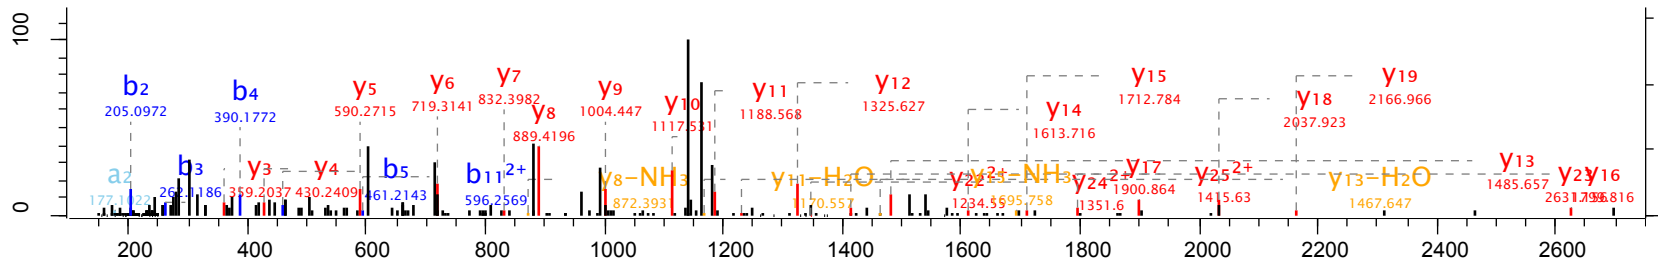

[1e4]

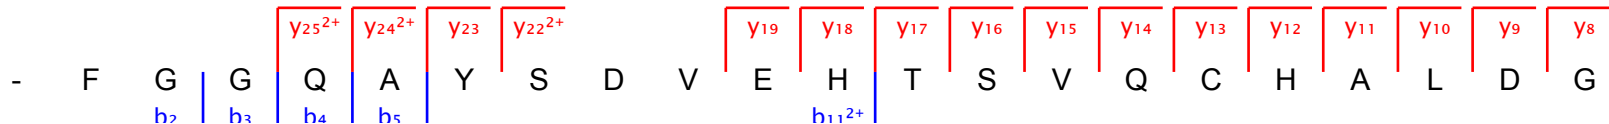

Raw file Scan Method Score m/z Gene names  
20140925\_fract13\_dyn\_5ul\_C5\_01\_448 36368 TOF; CID 68.75 879.92 TPM4

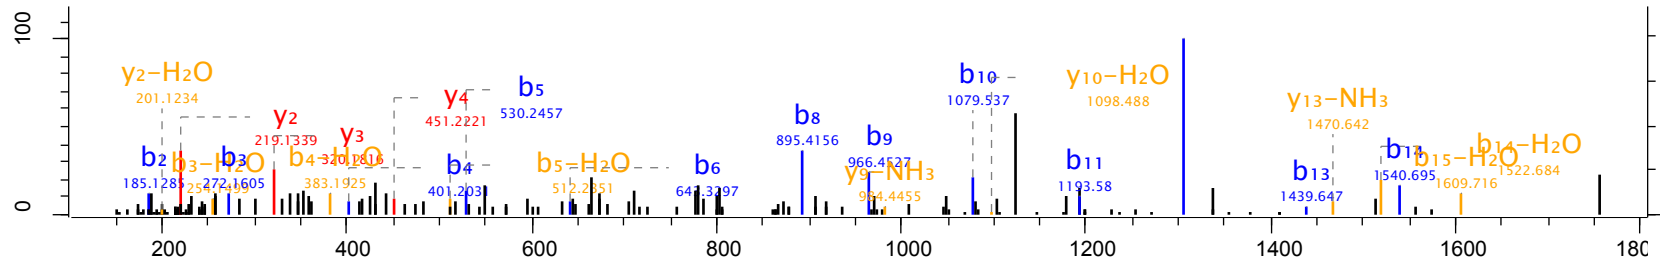

- A I | S | E | E | L | D H | A | L | N | D M | T | S L -  
b2 | b3 | b4 | b5 | b6 | b8 | b9 | b10 | b11 | b12 | b13 | b14

Raw file

Scan

Method

Score

m/z

Gene names

20140925\_fract14\_dyn\_5ul\_C6\_01\_449

8085

TOF; CID

68

521.27

GDF11

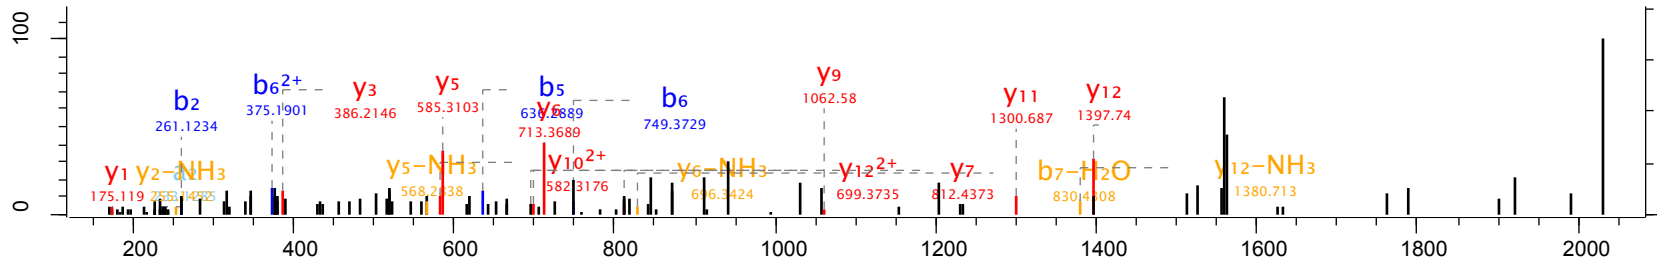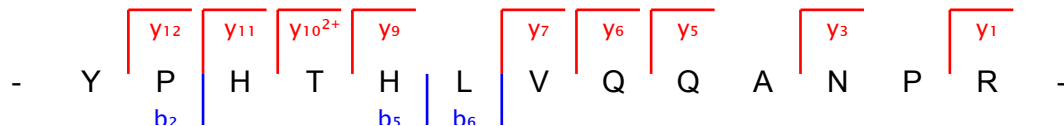

Raw file

20140925\_fract14\_dyn\_5ul\_C6\_01\_449

Scan

38602

Method

TOF; CID

Score

128.74

m/z

620.02

Gene names

GIPC2

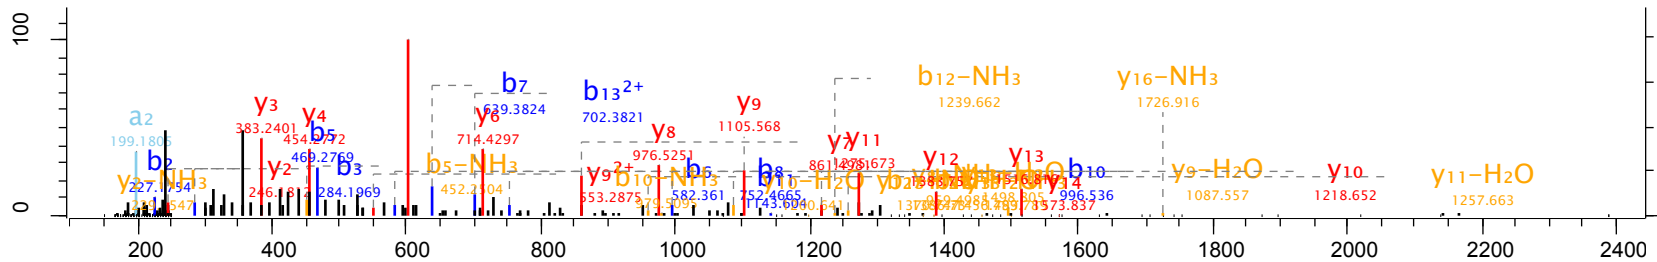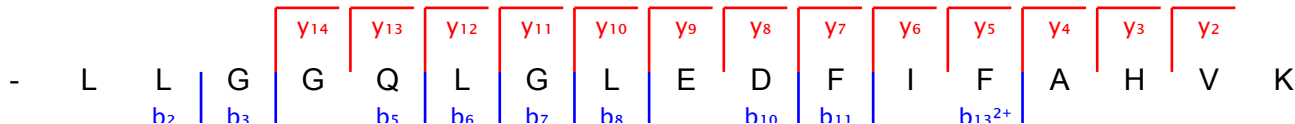

| Raw file                           | Scan  | Method   | Score | m/z    | Gene names |
|------------------------------------|-------|----------|-------|--------|------------|
| 20140925_fract15_dyn_5ul_C7_01_450 | 27155 | TOF; CID | 96.14 | 629.85 | C10orf90   |

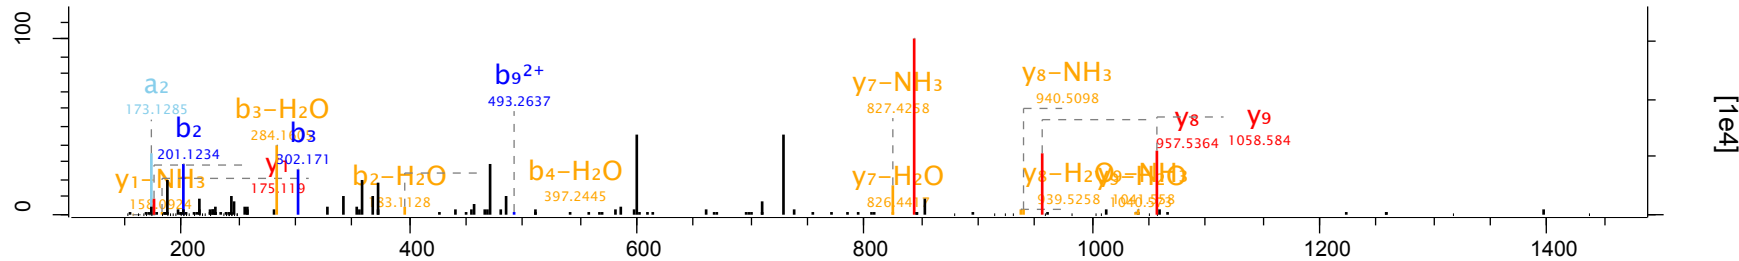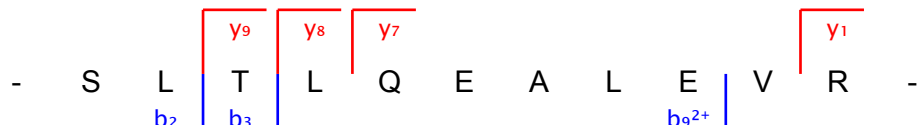

Raw file

Scan

Method

Score

m/z

Gene names

20140925\_fract16\_dyn\_5ul\_C8\_01\_451

18592

TOF; CID

81.57

1043.03

ZFP36

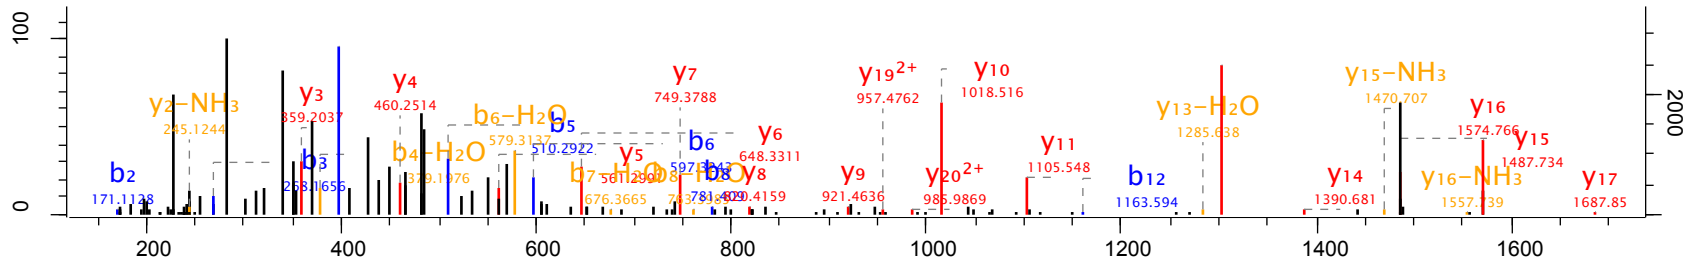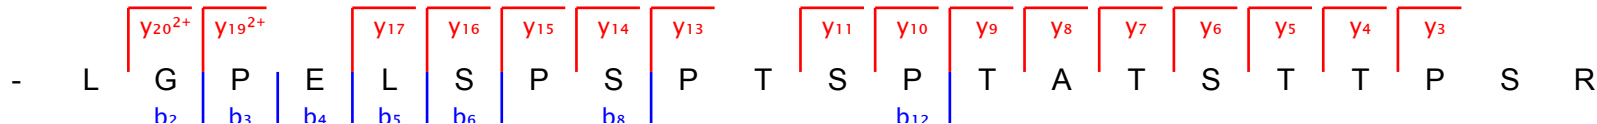



Raw file

20140925\_fract16\_dyn\_5ul\_C8\_01\_451

Scan

19513

Method

TOF; CID

Score

93.37

m/z

672.33

Gene names

TMEM243

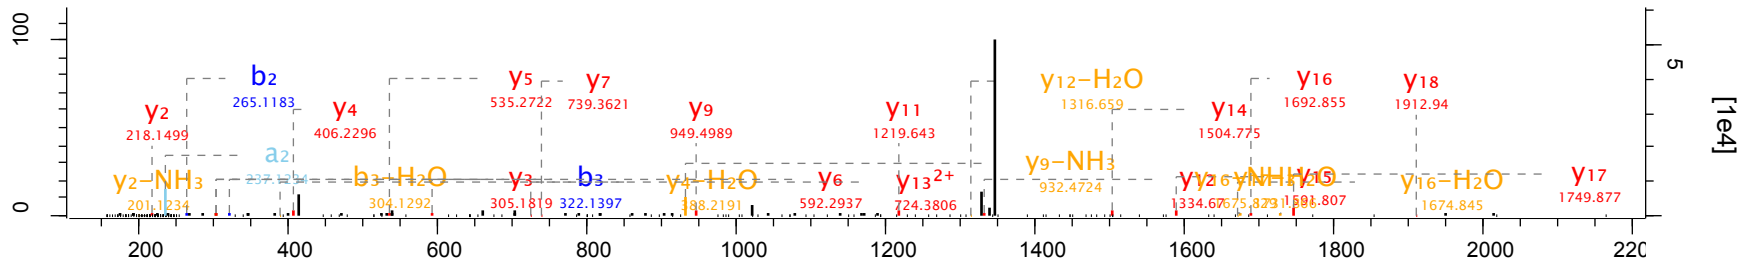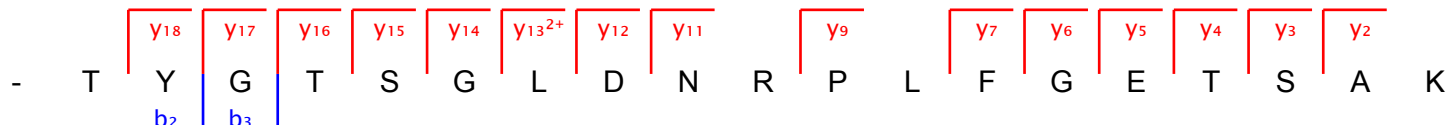

| Raw file                           | Scan  | Method   | Score  | m/z    | Gene names |
|------------------------------------|-------|----------|--------|--------|------------|
| 20140925_fract16_dyn_5ul_C8_01_451 | 19533 | TOF; CID | 137.05 | 524.28 | COX7C      |

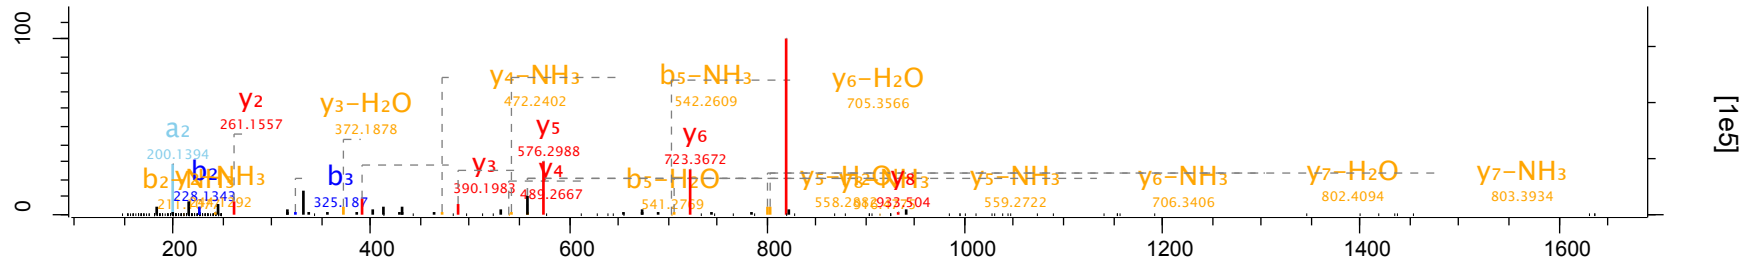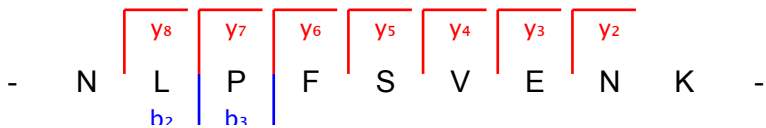

Raw file

20140925\_fract17\_dyn\_5ul\_H1\_01\_452

Scan

23260

Method

TOF; CID

Score

99.45

m/z

813.07

Gene names

LHFPL2

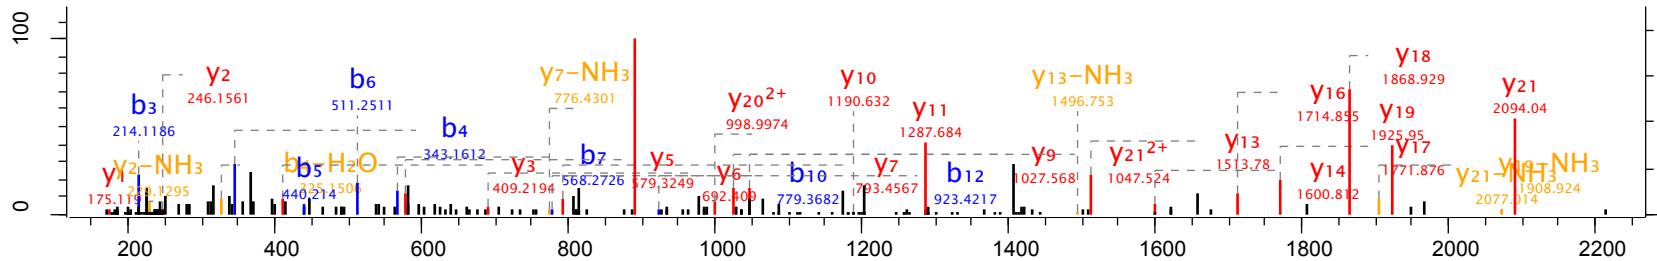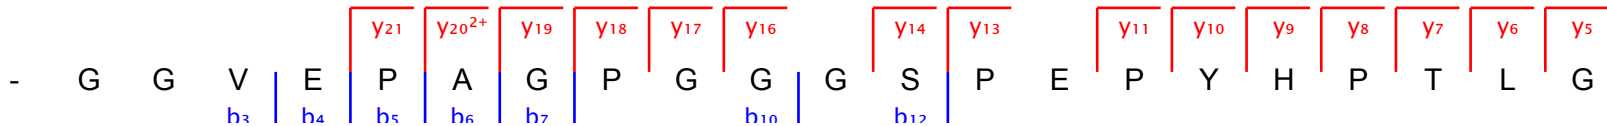

Raw file

20140925\_fract18\_dyn\_5ul\_H2\_01\_453

Scan

5019

Method

TOF; CID

Score

72.29

m/z

436.25

Gene names

ZNF707

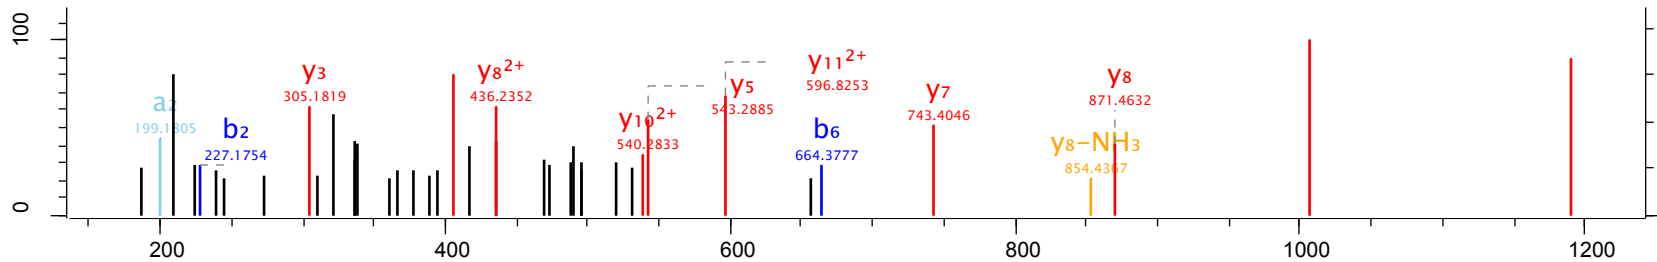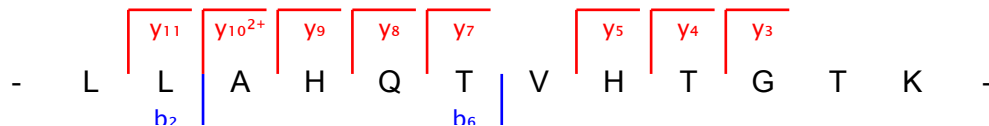

Raw file

20140925\_fract18\_dyn\_5ul\_H2\_01\_453

Scan

8990

Method

TOF; CID

Score

123.67

m/z

457.24

Gene names

ZFP62

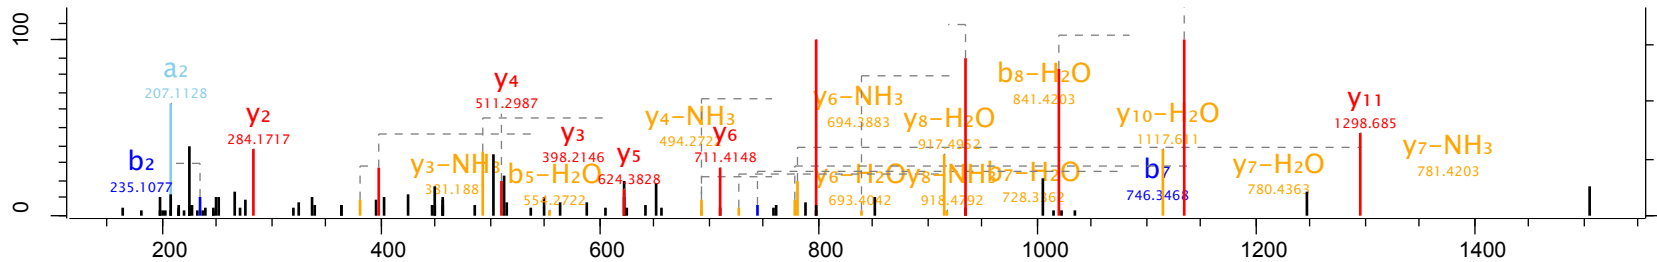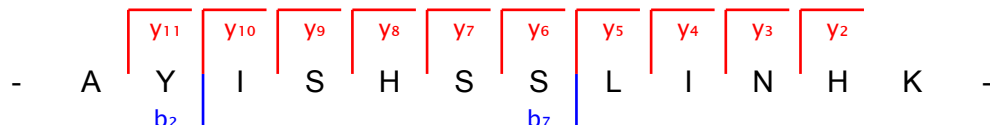

Raw file

20140925\_fract18\_dyn\_5ul\_H2\_01\_453

Scan

11106

Method

TOF; CID

Score

63.32

m/z

362.2

Gene names

RTN4R

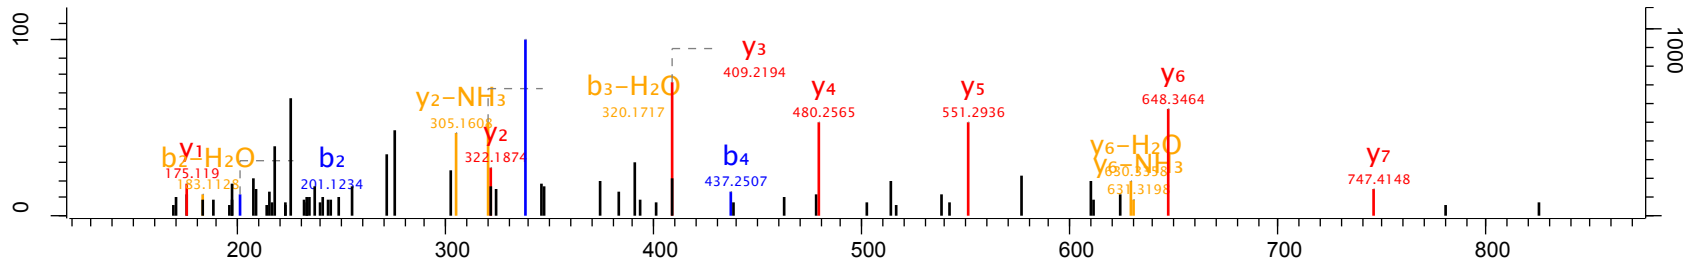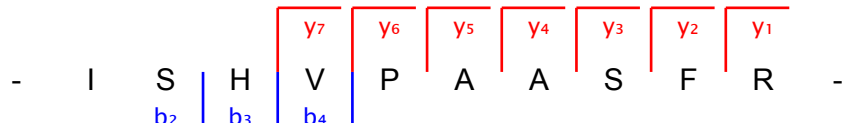

Raw file

Scan

Method

Score

m/z

Gene names

20140925\_fract18\_dyn\_5ul\_H2\_01\_453

15973

TOF; CID

81.3

365.55

ATAT1

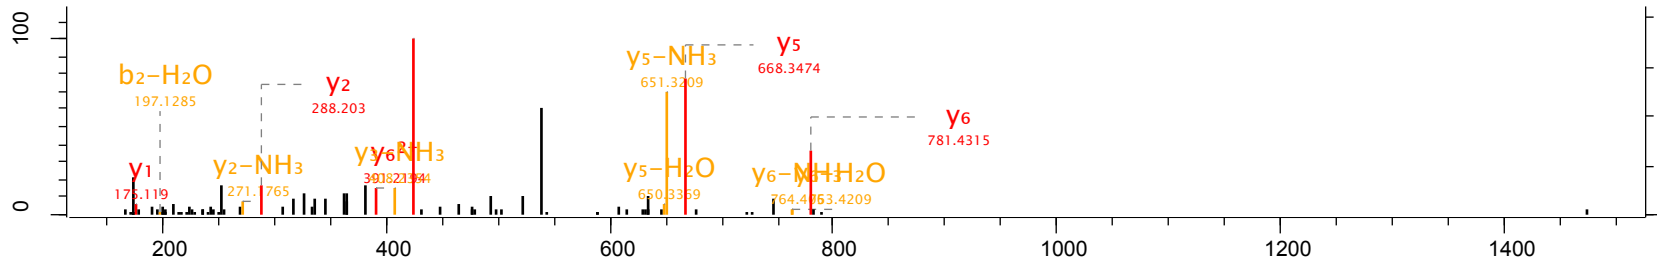

- I T V L D Q H L R -

Fragmentation patterns are indicated by red brackets above the amino acid sequence, showing the following assignments:

- $y_6$  covers L and D
- $y_5$  covers D and Q
- $y_3$  covers H and L
- $y_2$  covers L and R
- $y_1$  covers R

| Raw file                           | Scan  | Method   | Score  | m/z    | Gene names |
|------------------------------------|-------|----------|--------|--------|------------|
| 20140925_fract18_dyn_5ul_H2_01_453 | 26144 | TOF; CID | 106.28 | 941.45 | FAM168B    |

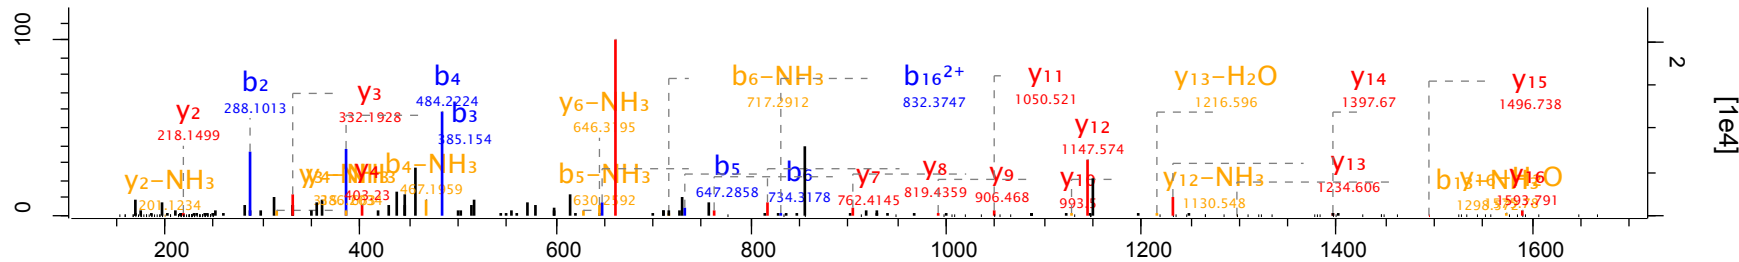

ac

- M N P V Y S P G S S G V P Y A N A K -

b<sub>2</sub> b<sub>3</sub> b<sub>4</sub> b<sub>5</sub> b<sub>6</sub> y<sub>16</sub> y<sub>15</sub> y<sub>14</sub> y<sub>13</sub> y<sub>12</sub> y<sub>11</sub> y<sub>10</sub> y<sub>9</sub> y<sub>8</sub> y<sub>7</sub> y<sub>6</sub> b<sub>16</sub><sup>2+</sup>



Raw file

20140925\_fract18\_dyn\_5ul\_H2\_01\_453

Scan

26801

Method

TOF; CID

Score

55.44

m/z

809.4

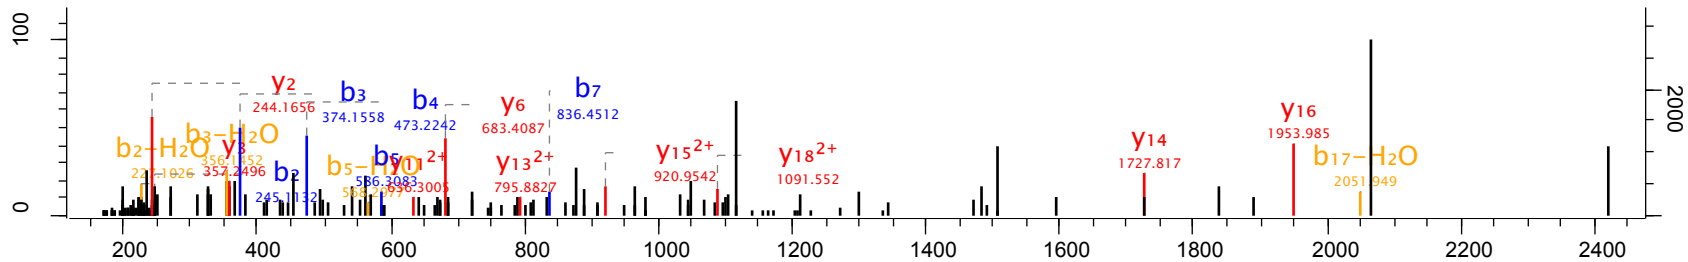

ac

- T T E V I L H Y R P C E S D P T Q L P K -

b<sub>2</sub> b<sub>3</sub> b<sub>4</sub> b<sub>5</sub> b<sub>7</sub>
y<sub>18</sub><sup>2+</sup> y<sub>16</sub> y<sub>15</sub><sup>2+</sup> y<sub>14</sub> y<sub>13</sub><sup>2+</sup> y<sub>11</sub><sup>2+</sup> y<sub>6</sub> y<sub>3</sub> y<sub>2</sub>

| Raw file                           | Scan  | Method   | Score | m/z    | Gene names |
|------------------------------------|-------|----------|-------|--------|------------|
| 20140925_fract18_dyn_5ul_H2_01_453 | 33602 | TOF; CID | 77.75 | 808.43 | NAA60      |

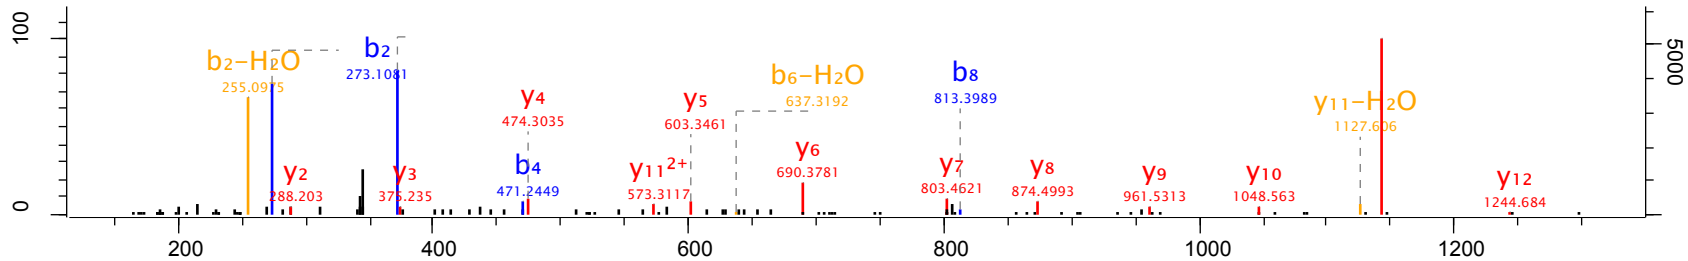

ac

- T E V V P S S A L S E V S L R -

h<sub>2</sub> | h<sub>3</sub> | h<sub>4</sub> | h<sub>8</sub>

y<sub>12</sub> | y<sub>11</sub> | y<sub>10</sub> | y<sub>9</sub> | y<sub>8</sub> | y<sub>7</sub> | y<sub>6</sub> | y<sub>5</sub> | y<sub>4</sub> | y<sub>3</sub> | y<sub>2</sub>

Raw file

20140925\_fract19\_dyn\_5ul\_H3\_01\_454

Scan

6187

Method

TOF; CID

Score

79.12

m/z

348.87

Gene names

ZNF12

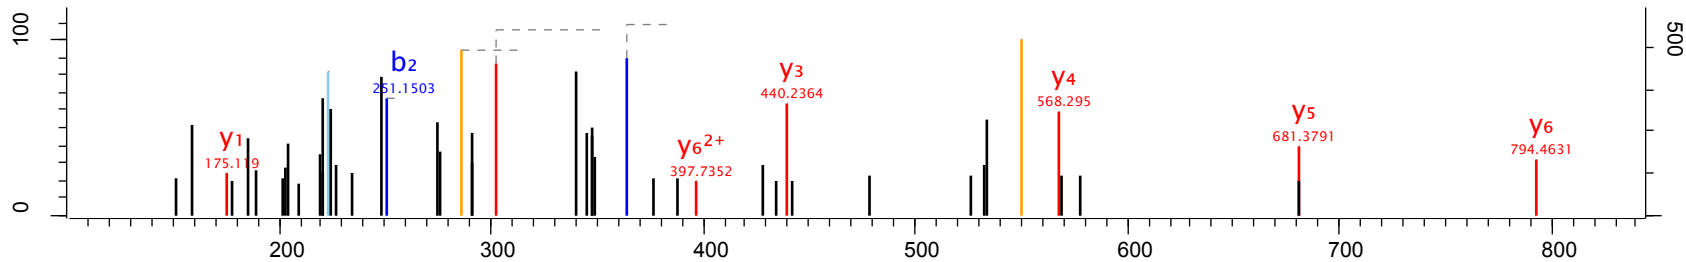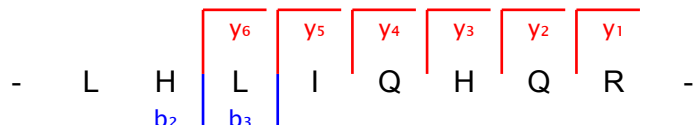

| Raw file                           | Scan  | Method   | Score | m/z    | Gene names |
|------------------------------------|-------|----------|-------|--------|------------|
| 20140925_fract19_dyn_5ul_H3_01_454 | 14659 | TOF; CID | 49.19 | 514.27 | TMEM53     |

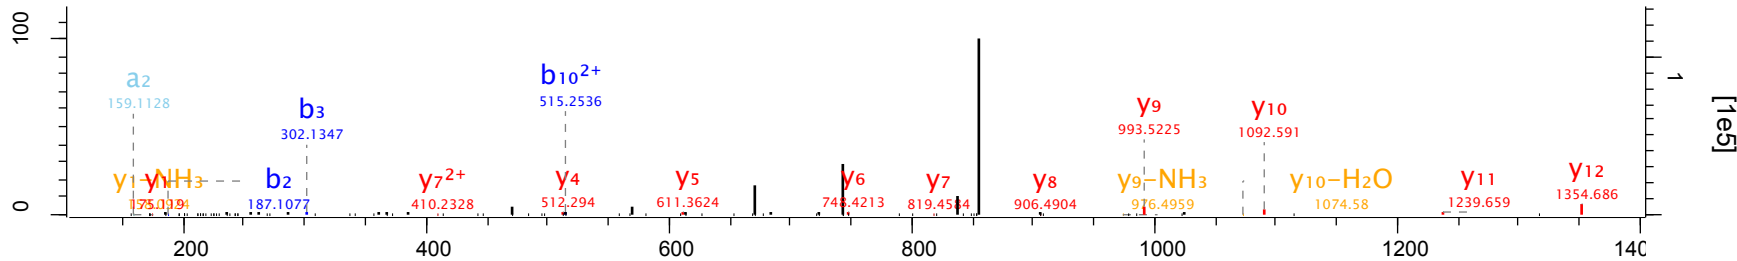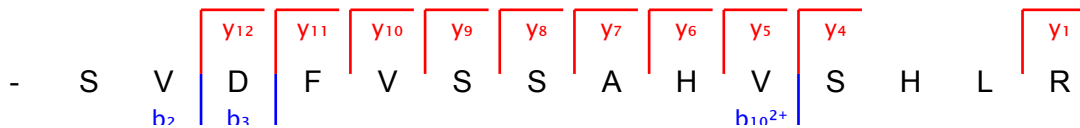

| Raw file                           | Scan  | Method   | Score | m/z   | Gene names |
|------------------------------------|-------|----------|-------|-------|------------|
| 20140925_fract19_dyn_5ul_H3_01_454 | 15075 | TOF; CID | 90.15 | 499.8 | DNAJB14    |

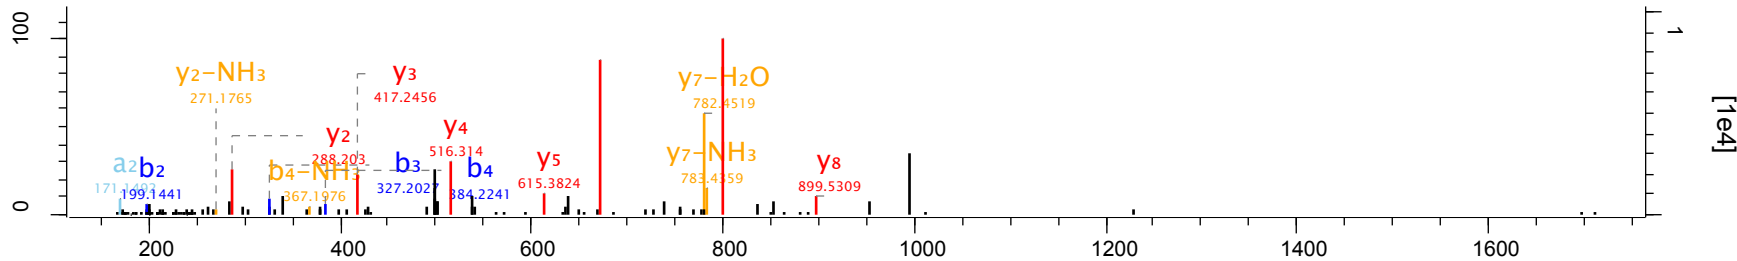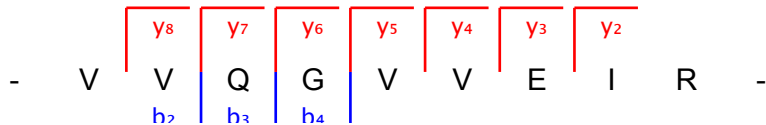

| Raw file                           | Scan  | Method   | Score  | m/z    | Gene names |
|------------------------------------|-------|----------|--------|--------|------------|
| 20140925_fract19_dyn_5ul_H3_01_454 | 18392 | TOF; CID | 130.04 | 510.78 | MAP2K5     |

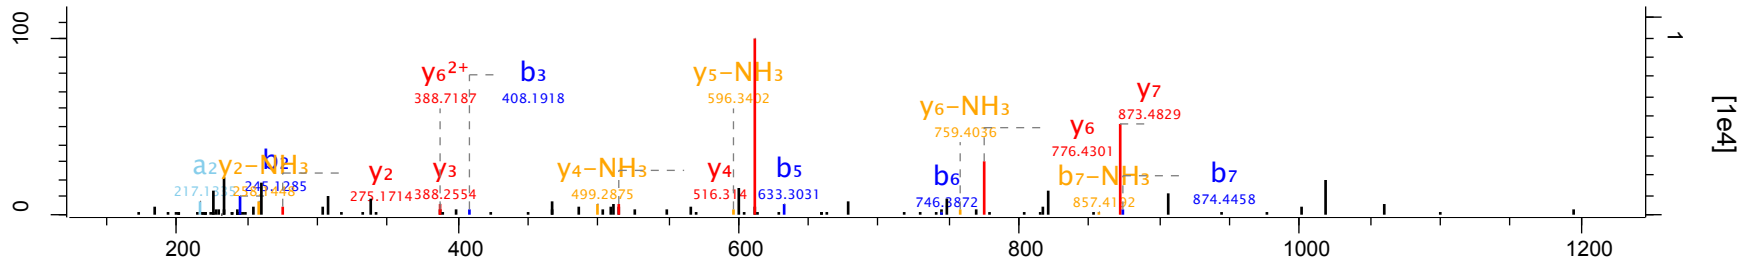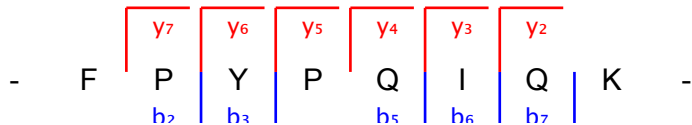

Raw file

20140925\_fract19\_dyn\_5ul\_H3\_01\_454

Scan

26432

Method

TOF; CID

Score

42.64

m/z

712.7

Gene names

SDC3

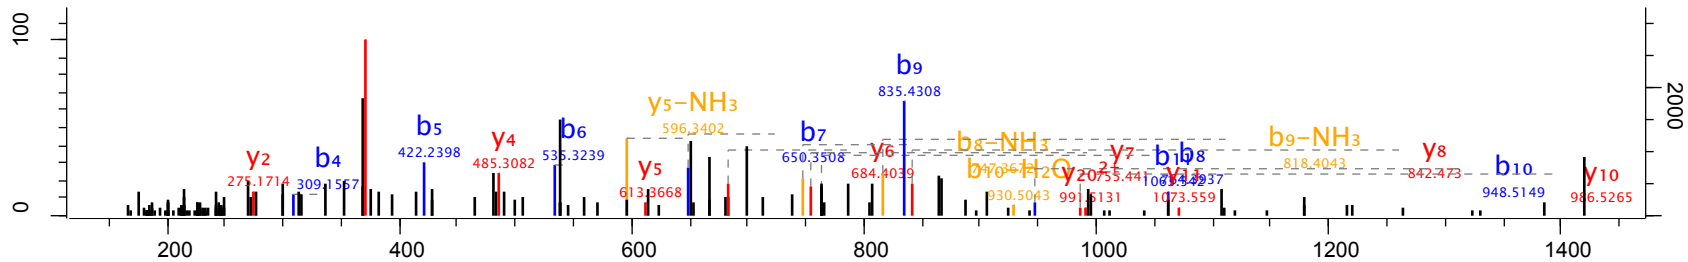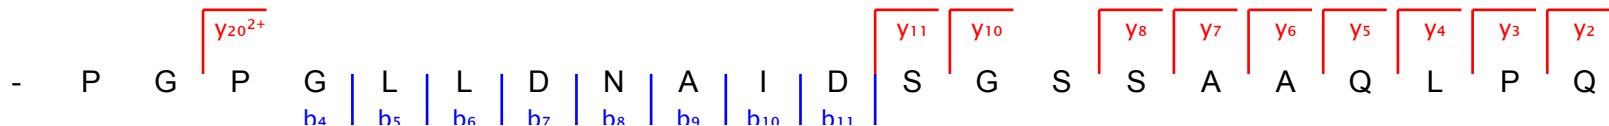

Raw file

20140925\_fract20\_dyn\_5ul\_H4\_01\_455

Scan

16399

Method

TOF; CID

Score

46.89

m/z

610.33

Gene names

SLC22A20

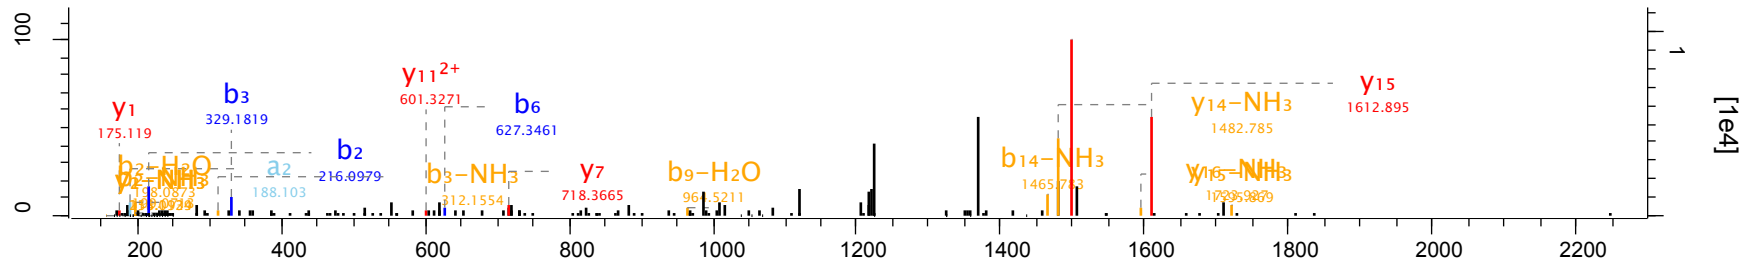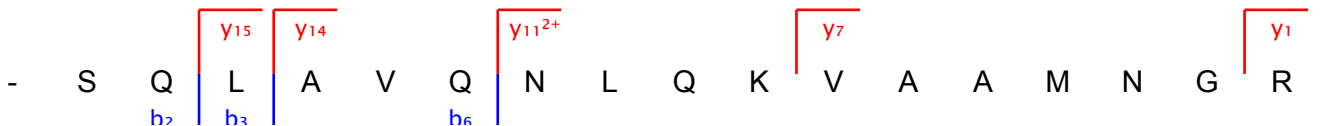



| Raw file                           | Scan  | Method   | Score | m/z    | Gene names |
|------------------------------------|-------|----------|-------|--------|------------|
| 20140925_fract20_dyn_5ul_H4_01_455 | 23305 | TOF; CID | 48.9  | 867.95 | FAM102A    |

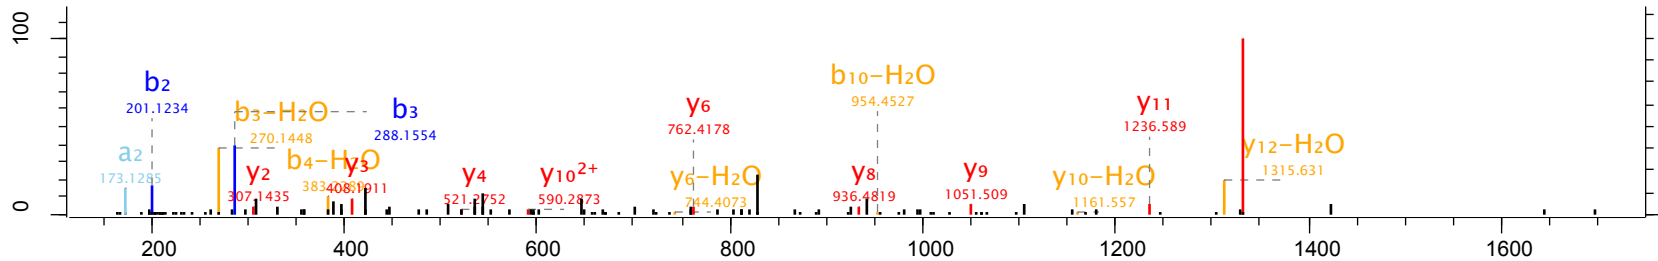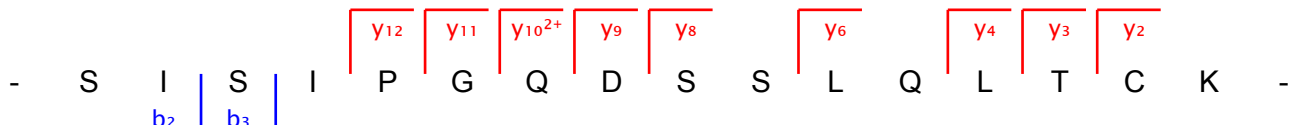

| Raw file                           | Scan  | Method   | Score | m/z    | Gene names |
|------------------------------------|-------|----------|-------|--------|------------|
| 20140925_fract20_dyn_5ul_H4_01_455 | 31205 | TOF; CID | 68    | 673.36 | CD82       |

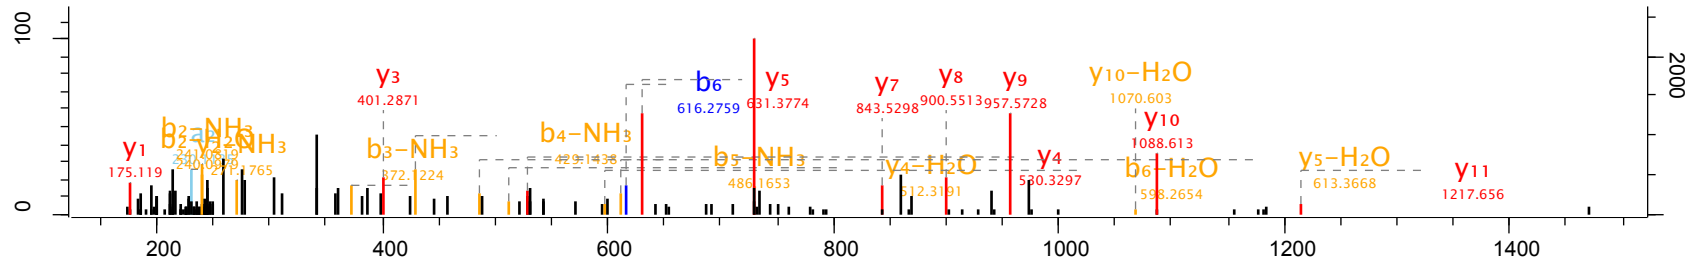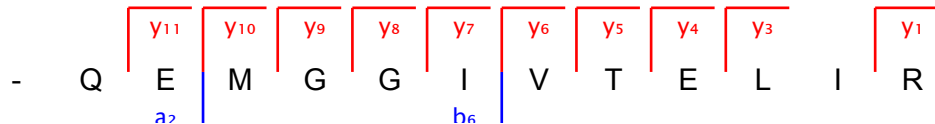

| Raw file                           | Scan  | Method   | Score  | m/z    | Gene names |
|------------------------------------|-------|----------|--------|--------|------------|
| 20140925_fract21_dyn_5ul_H5_01_456 | 16339 | TOF; CID | 115.71 | 565.34 | NIPA2      |

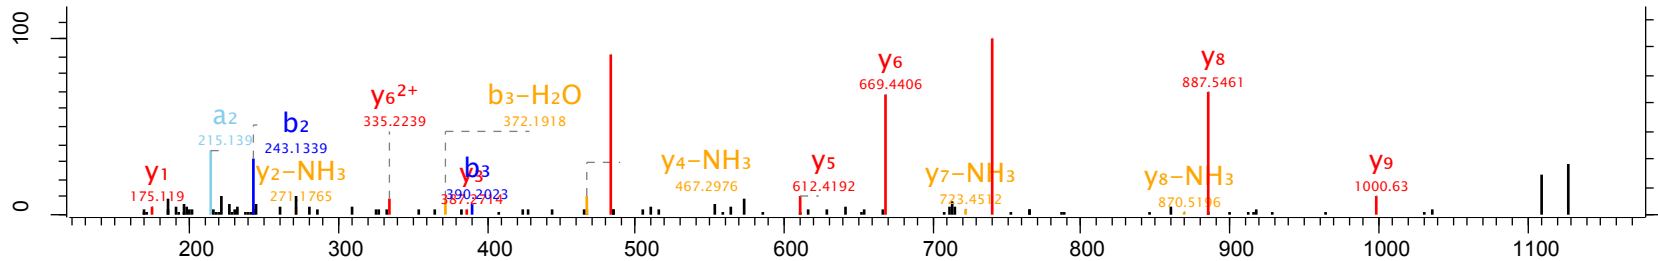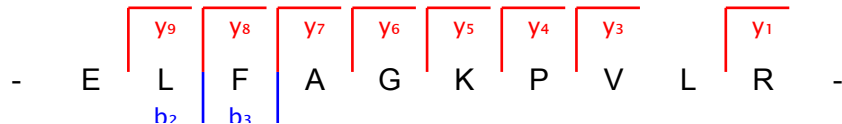

Raw file

20140925\_fract21\_dyn\_5ul\_H5\_01\_456

Scan

24059

Method

TOF; CID

Score

91.62

m/z

501.6

Gene names

HEMK1

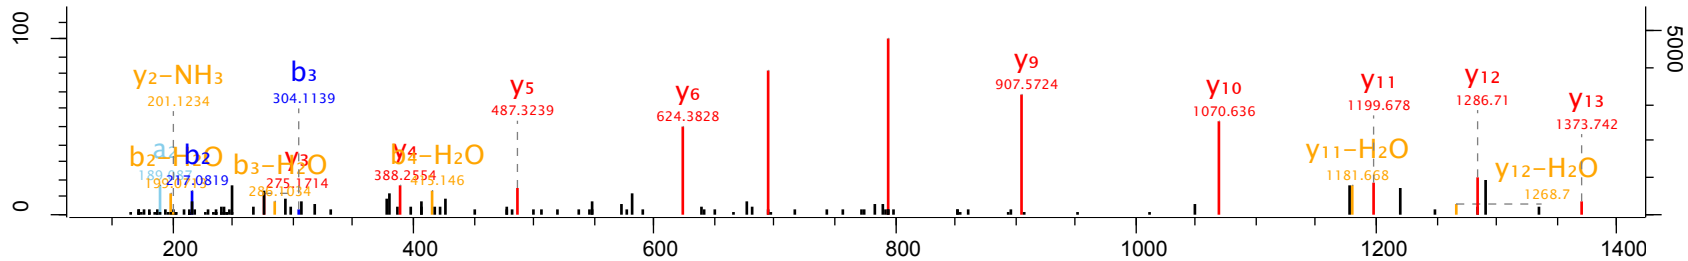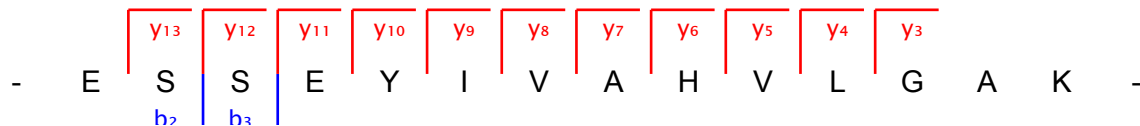

| Raw file                           | Scan  | Method   | Score  | m/z    | Gene names |
|------------------------------------|-------|----------|--------|--------|------------|
| 20140925_fract22_dyn_5ul_H6_01_457 | 21078 | TOF; CID | 120.55 | 509.28 | NLK        |

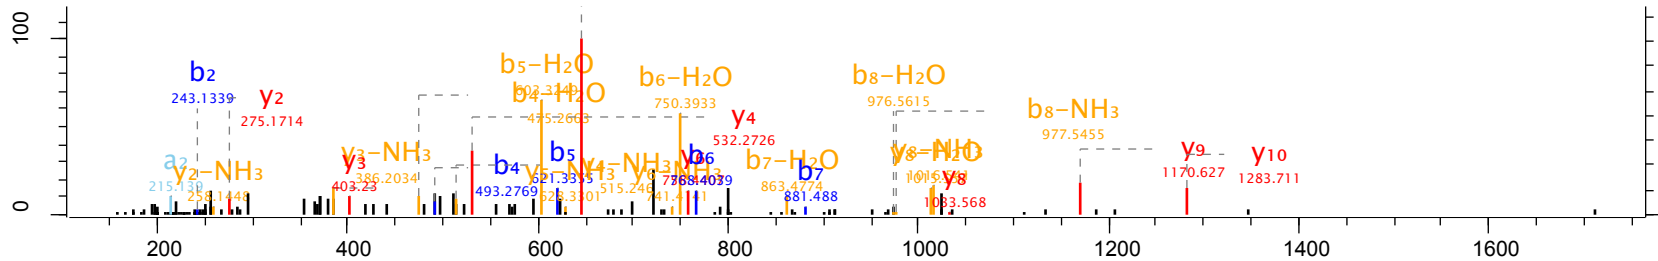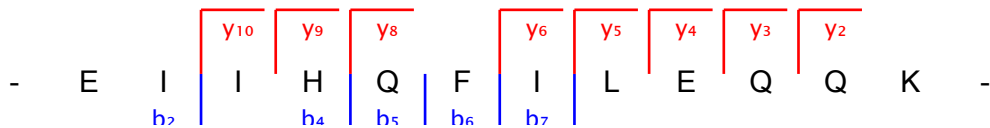

| Raw file                           | Scan  | Method   | Score | m/z    | Gene names |
|------------------------------------|-------|----------|-------|--------|------------|
| 20140925_fract23_dyn_5ul_H7_01_458 | 10320 | TOF; CID | 76.23 | 450.27 | SOX4       |

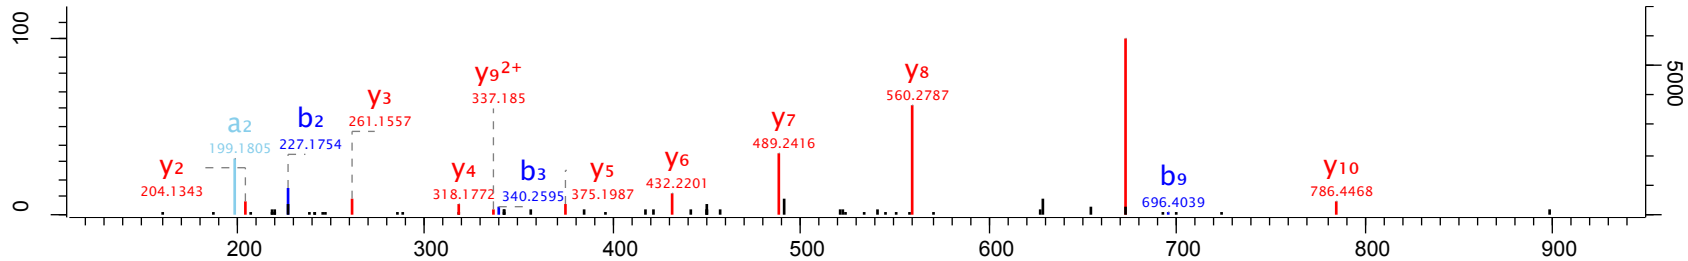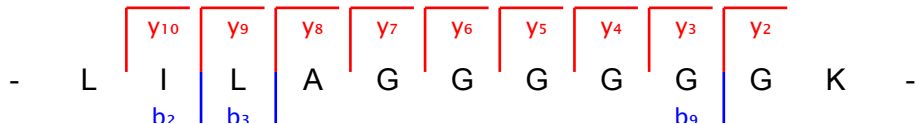

Raw file

Scan

Method

Score

m/z

Gene names

20140925\_fract23\_dyn\_5ul\_H7\_01\_458

11453

TOF; CID

134.48

554.76

ZNF341

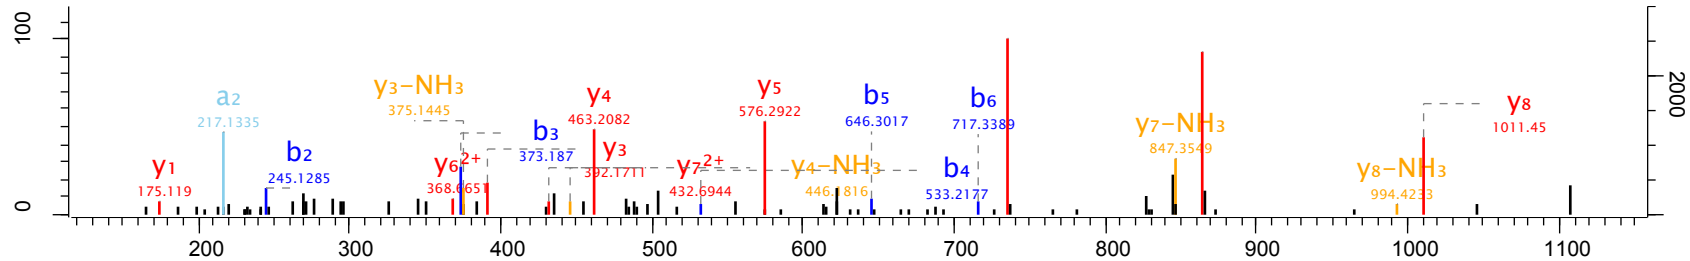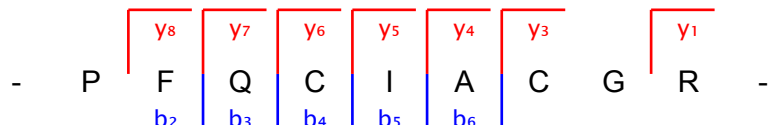

Raw file

Scan

Method

Score

m/z

Gene names

20140925\_fract23\_dyn\_5ul\_H7\_01\_458

28773

TOF; CID

43.7

1072.54

METTL12

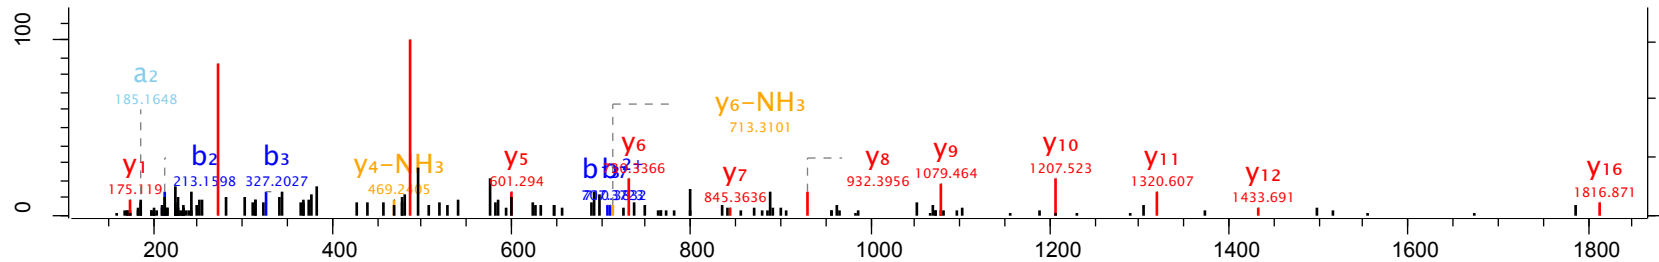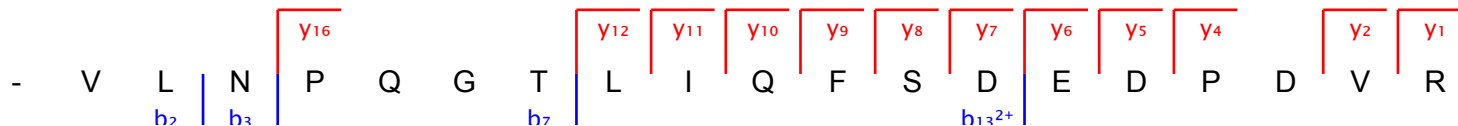



Raw file

20140925\_fract23\_dyn\_5ul\_H7\_01\_458

Scan

33082

Method

TOF; CID

Score

107.75

m/z

961.13

Gene names

SFT2D1

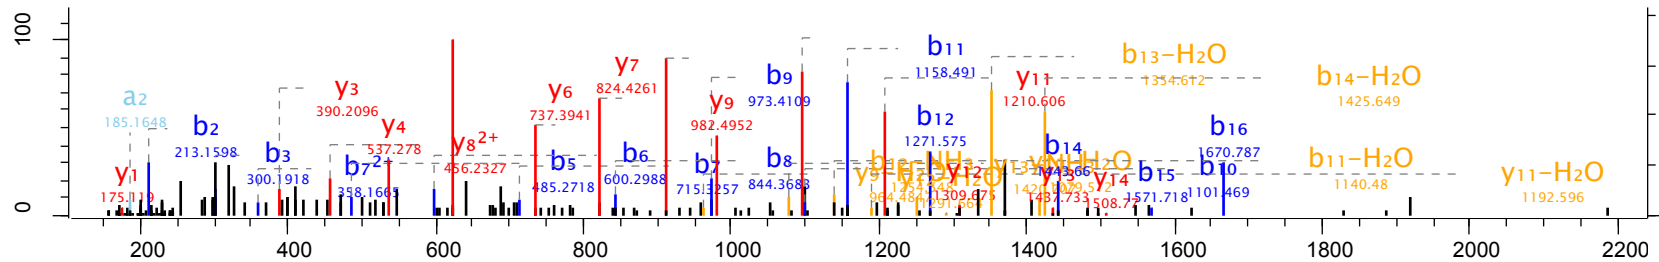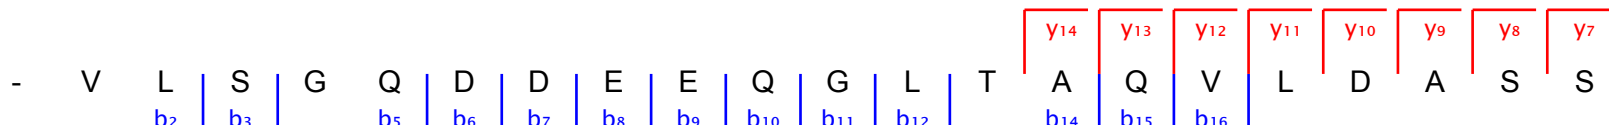

| Raw file                           | Scan | Method   | Score | m/z    | Gene names |
|------------------------------------|------|----------|-------|--------|------------|
| 20140925_fract24_dyn_5ul_H8_01_459 | 9206 | TOF; CID | 74.79 | 570.63 | RCBTB2     |

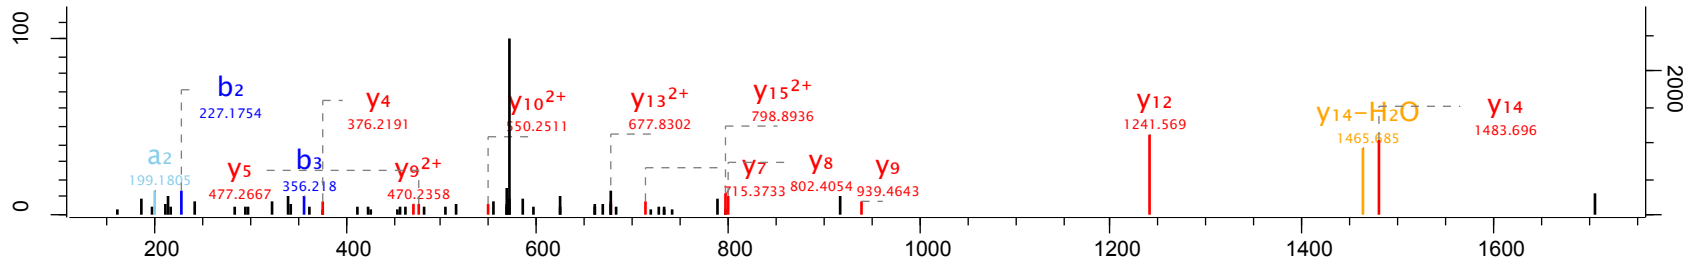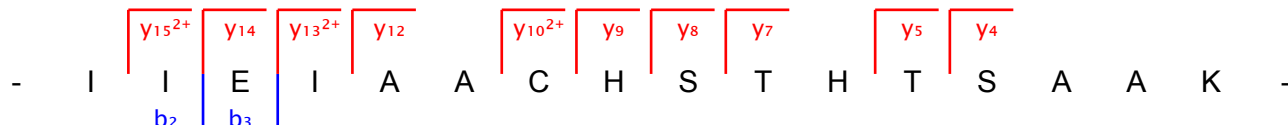

Raw file

Scan

Method

Score

m/z

Gene names

20140925\_fract24\_dyn\_5ul\_H8\_01\_459

19885

TOF; CID

53.45

552.98

FAM189B

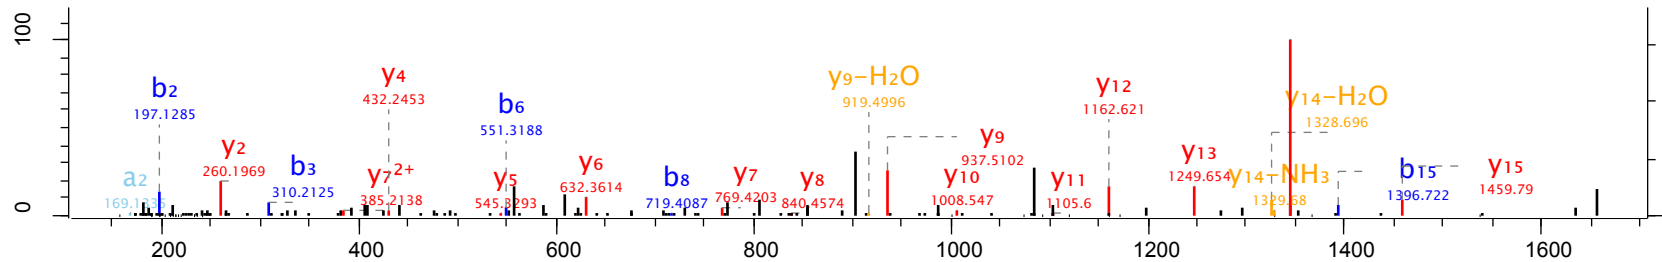

[1e4]

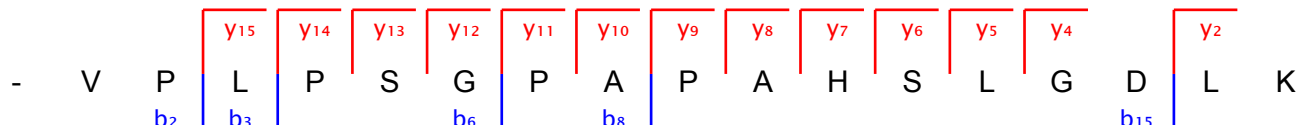

Raw file

20141014\_fract1\_dyn\_5ul\_E1\_01\_580

Scan

27070

Method

TOF; CID

Score

80.24

m/z

699.87

Gene names

DEPTOR

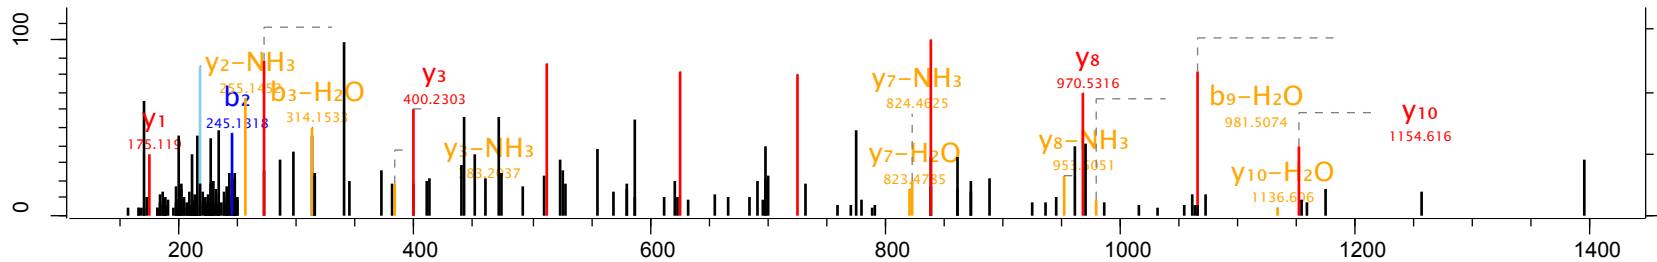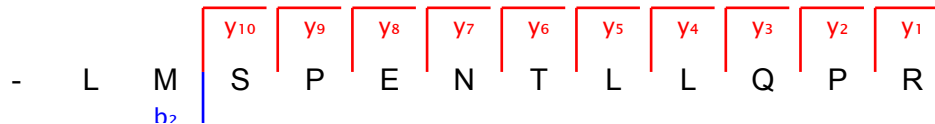

Raw file

20141014\_fract2\_dyn\_5ul\_E2\_01\_581

Scan

3355

Method

TOF; CID

Score

81.1

m/z

390.53

Gene names

BBIP1

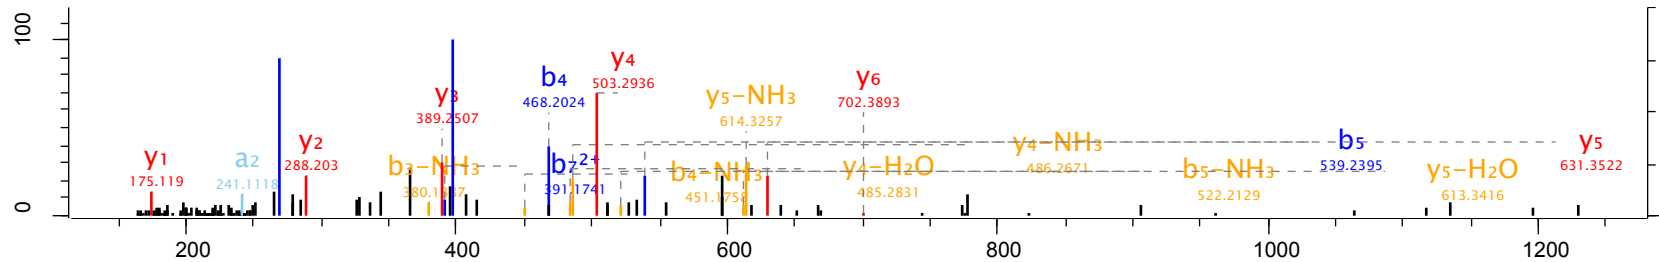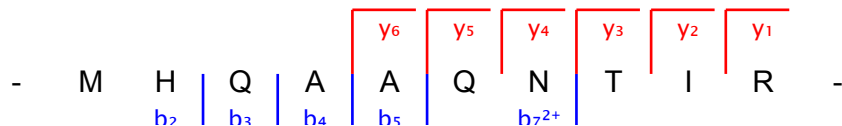

| Raw file                          | Scan | Method   | Score | m/z    | Gene names |
|-----------------------------------|------|----------|-------|--------|------------|
| 20141014_fract2_dyn_5ul_E2_01_581 | 8678 | TOF; CID | 52.25 | 482.24 | ZNF165     |

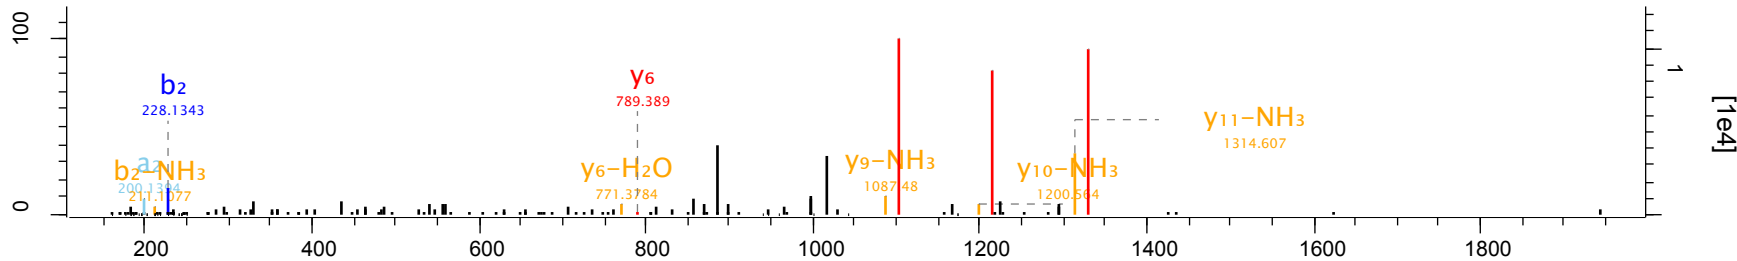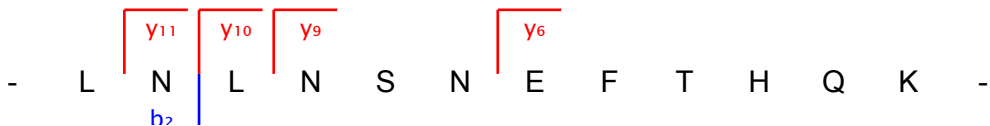

| Raw file                          | Scan  | Method   | Score | m/z    | Gene names |
|-----------------------------------|-------|----------|-------|--------|------------|
| 20141014_fract2_dyn_5ul_E2_01_581 | 11931 | TOF; CID | 87.18 | 502.25 | C18orf32   |

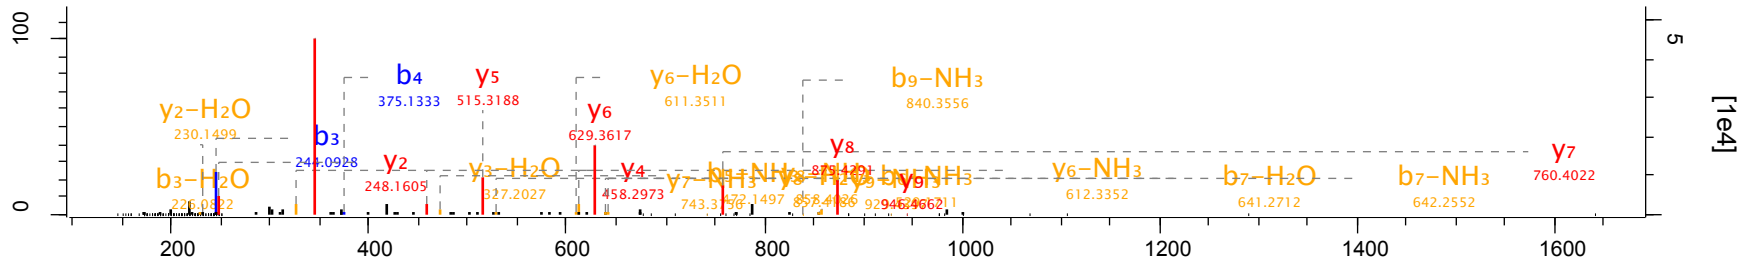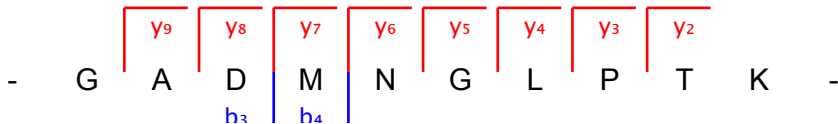

Raw file

20141014\_fract2\_dyn\_5ul\_E2\_01\_581

Scan

33792

Method

TOF; CID

Score

136.83

m/z

582.95

Gene names

TMEM138

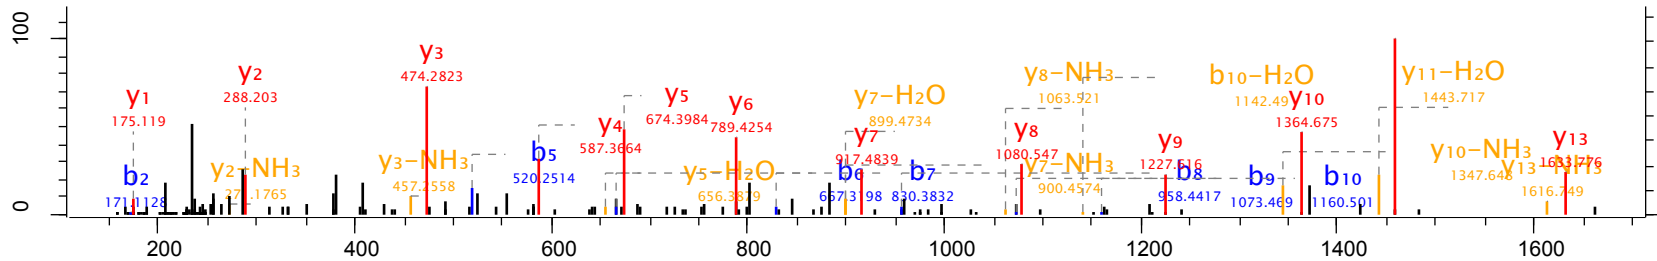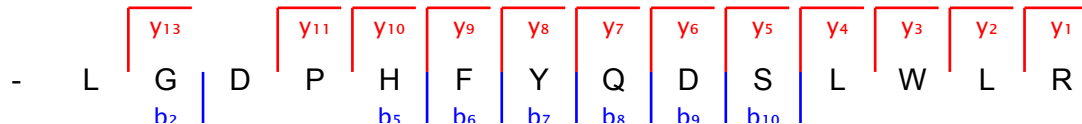



Raw file

Scan

Method

Score

m/z

Gene names

20141014\_fract2\_dyn\_5ul\_E2\_01\_581

35148

TOF; CID

90.15

530.29

PHLDA1

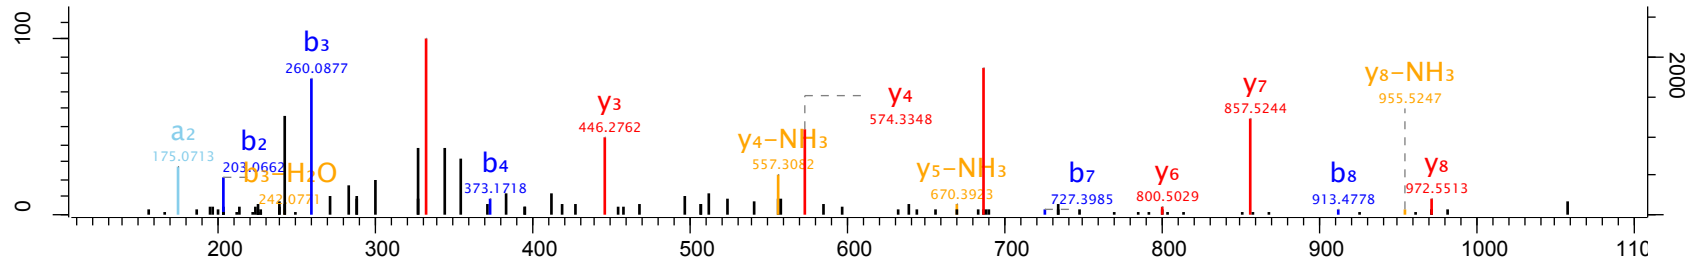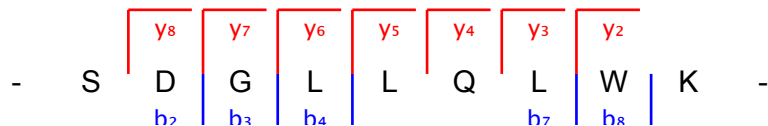

| Raw file                          | Scan  | Method   | Score | m/z    | Gene names |
|-----------------------------------|-------|----------|-------|--------|------------|
| 20141014_fract2_dyn_5ul_E2_01_581 | 37360 | TOF; CID | 82.65 | 516.97 | STK17B     |

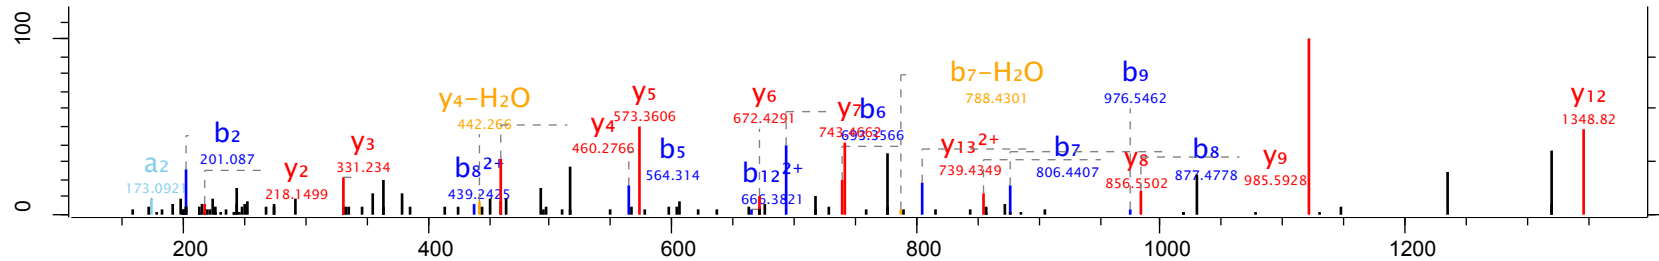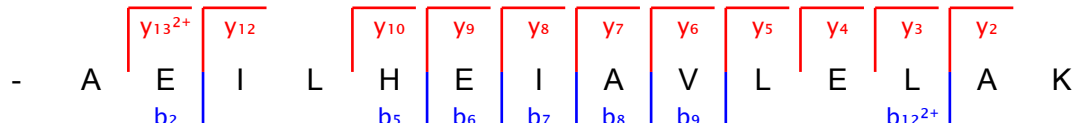

Raw file

20141014\_fract2\_dyn\_5ul\_E2\_01\_581

Scan

38373

Method

TOF; CID

Score

142.43

m/z

628.32

Gene names

SLC2A6

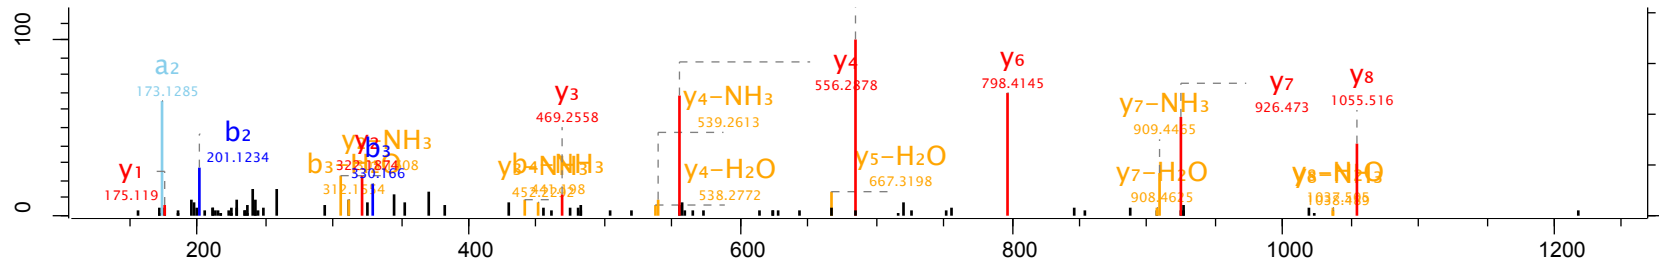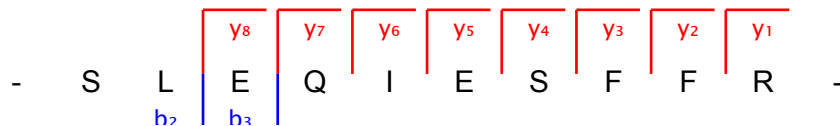

Raw file

20141014\_fract2\_dyn\_5ul\_E2\_01\_581

Scan

41524

Method

TOF; CID

Score

43.73

m/z

1040.48

Gene names

FUOM

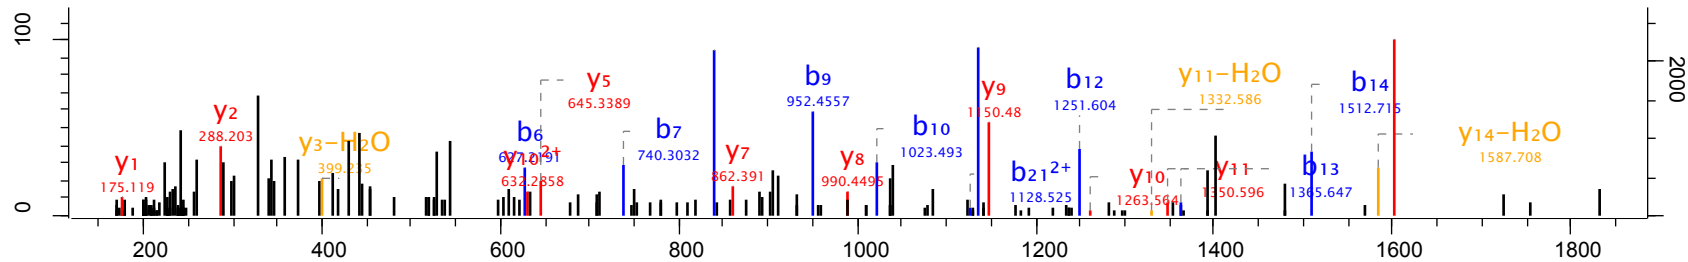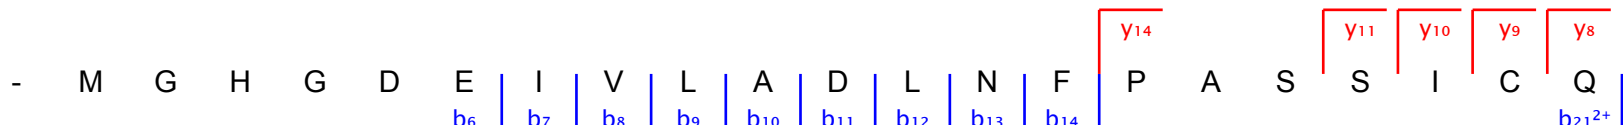

Raw file

20141014\_fract3\_dyn\_5ul\_E3\_01\_582

Scan

7727

Method

TOF; CID

Score

104.01

m/z

601.79

Gene names

C1orf53

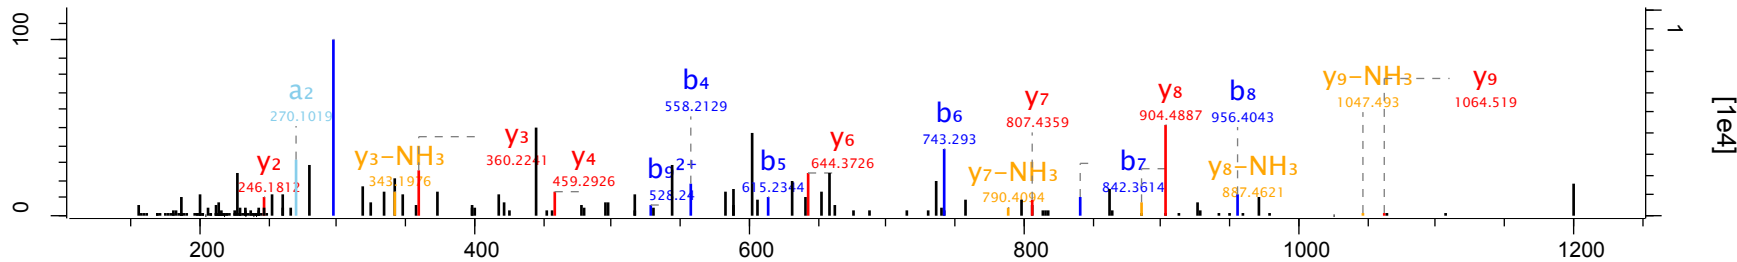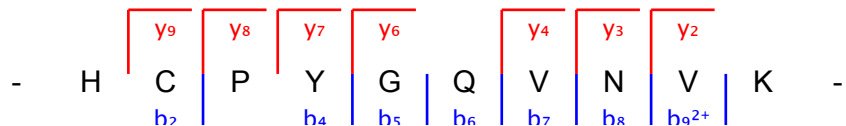

Raw file

20141014\_fract3\_dyn\_5ul\_E3\_01\_582

Scan

21322

Method

TOF; CID

Score

79.49

m/z

764.63

Gene names

SMIM14

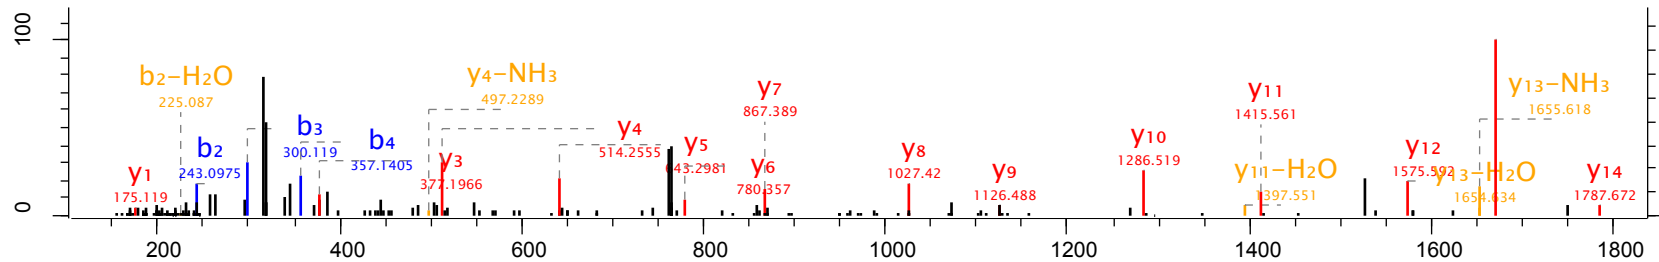

ac

- A E | G | G | F D P C E C V C S H E H A M R -

b<sub>2</sub> | b<sub>3</sub> | b<sub>4</sub>

y<sub>14</sub> | y<sub>13</sub> | y<sub>12</sub> | y<sub>11</sub> | y<sub>10</sub> | y<sub>9</sub> | y<sub>8</sub> | y<sub>7</sub> | y<sub>6</sub> | y<sub>5</sub> | y<sub>4</sub> | y<sub>3</sub> | y<sub>1</sub>

| Raw file                          | Scan  | Method   | Score | m/z    | Gene names |
|-----------------------------------|-------|----------|-------|--------|------------|
| 20141014_fract3_dyn_5ul_E3_01_582 | 28058 | TOF; CID | 58.32 | 487.59 | TMEM231    |

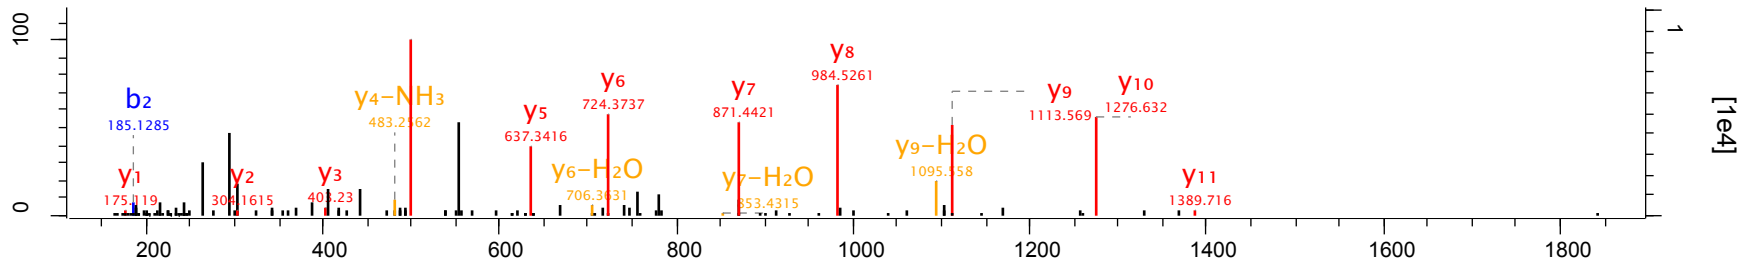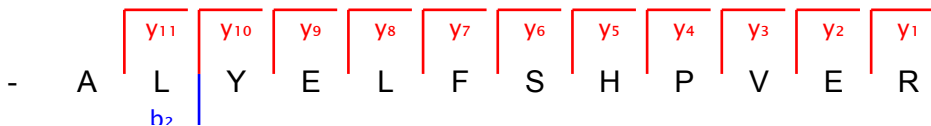

Raw file

Scan

Method

Score

m/z

Gene names

20141014\_fract3\_dyn\_5ul\_E3\_01\_582

38024

TOF; CID

65.04

777.4

TPRA1

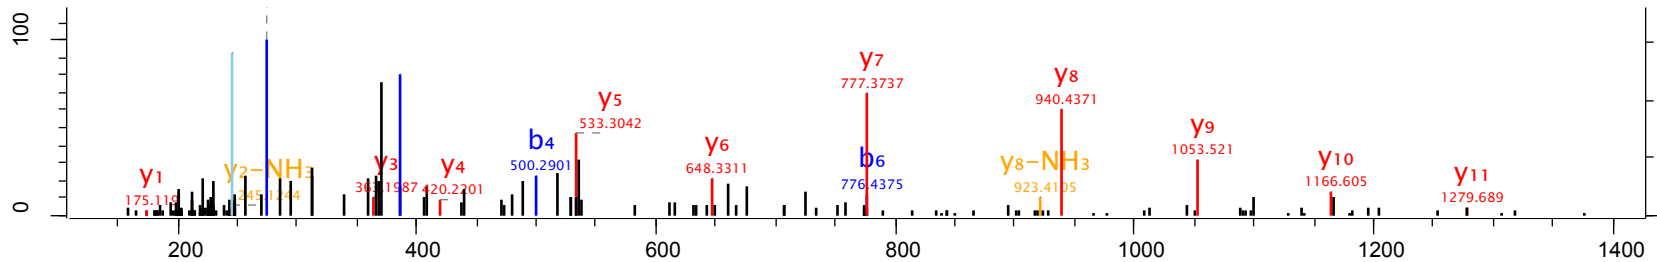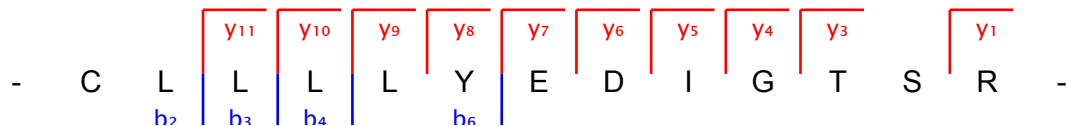



Raw file

20141014\_fract4\_dyn\_5ul\_E4\_01\_583

Scan

19196

Method

TOF; CID

Score

91.28

m/z

650.82

Gene names

SLC36A4

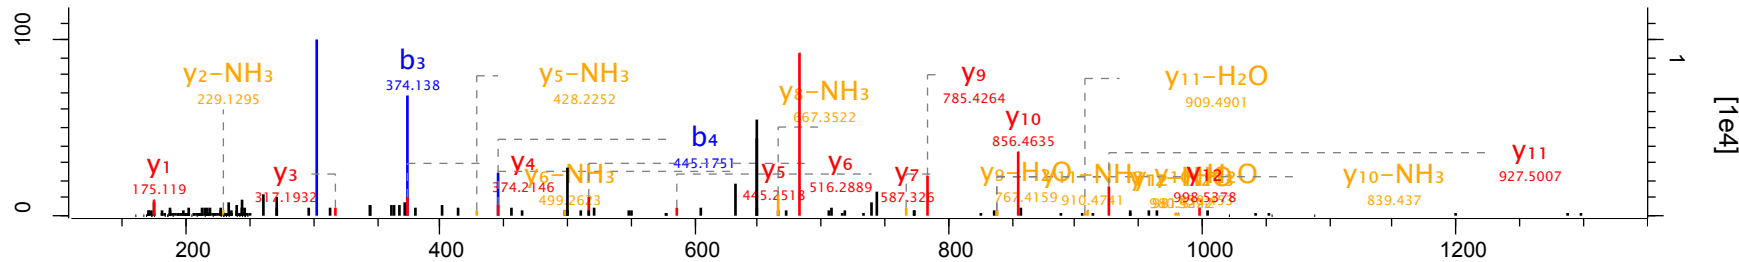

ac

M E A A A T P A A A G A A R -

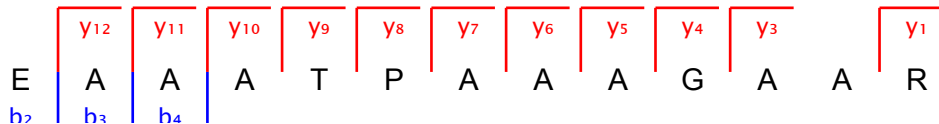

Raw file

Scan

Method

Score

m/z

Gene names

20141014\_fract4\_dyn\_5ul\_E4\_01\_583

29058

TOF; CID

86.18

572.33

BOK

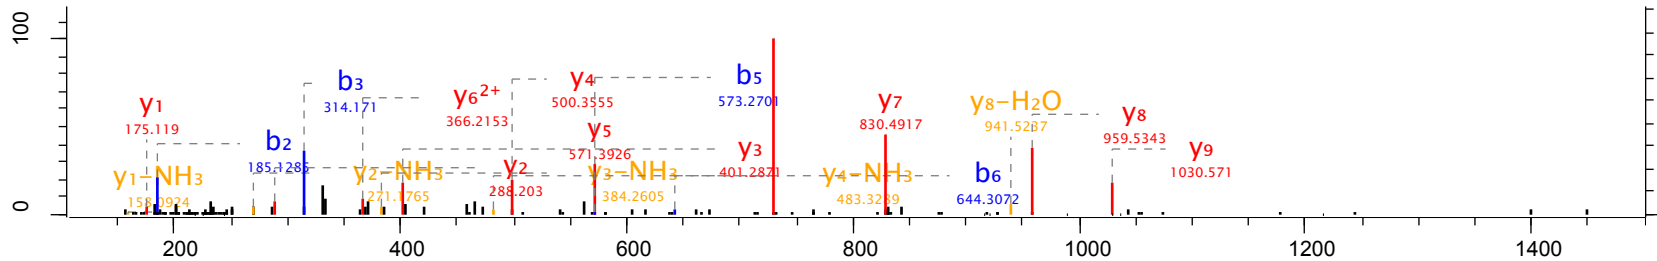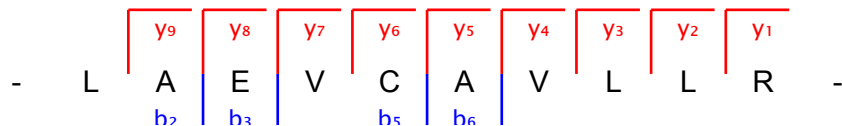

Raw file

20141014\_fract4\_dyn\_5ul\_E4\_01\_583

Scan

38279

Method

TOF; CID

Score

59.25

m/z

953.5

Gene names

C4orf46

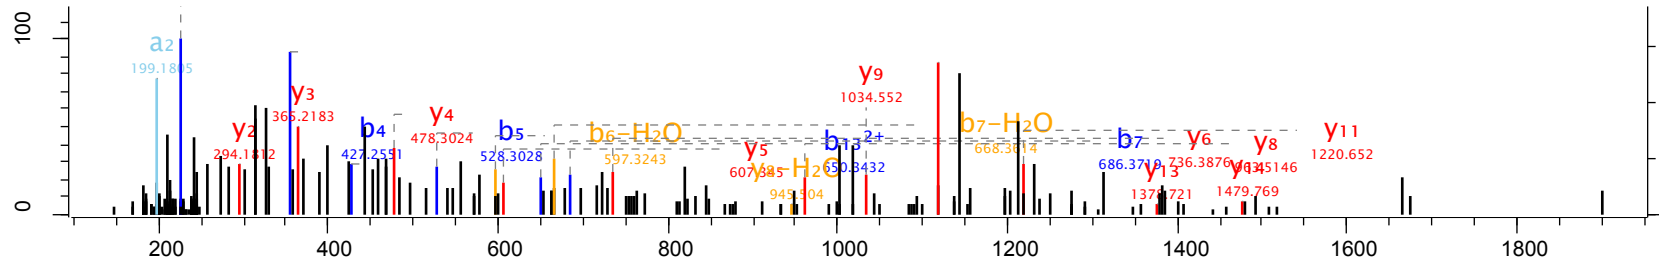

Fragmentation map showing amino acid sequence and fragmentation sites:

- L L E A T S A V S A Q V E E L A F K -

Fragmentation sites are indicated by vertical lines and brackets above the sequence:

- h<sub>2</sub> (blue line) at L
- h<sub>3</sub> (blue line) at E
- h<sub>4</sub> (blue line) at A
- h<sub>5</sub> (blue line) at T
- h<sub>7</sub> (blue line) at A
- h<sub>13</sub><sup>2+</sup> (blue line) at E
- y<sub>2</sub> (red bracket) above F
- y<sub>3</sub> (red bracket) above A
- y<sub>4</sub> (red bracket) above L
- y<sub>5</sub> (red bracket) above E
- y<sub>6</sub> (red bracket) above E
- y<sub>8</sub> (red bracket) above Q
- y<sub>9</sub> (red bracket) above A
- y<sub>10</sub> (red bracket) above S
- y<sub>11</sub> (red bracket) above V
- y<sub>13</sub> (red bracket) above S
- y<sub>14</sub> (red bracket) above T

Raw file

20141014\_fract5\_dyn\_5ul\_E5\_01\_584

Scan

12423

Method

TOF; CID

Score

135.1

m/z

640.8

Gene names

C17orf89

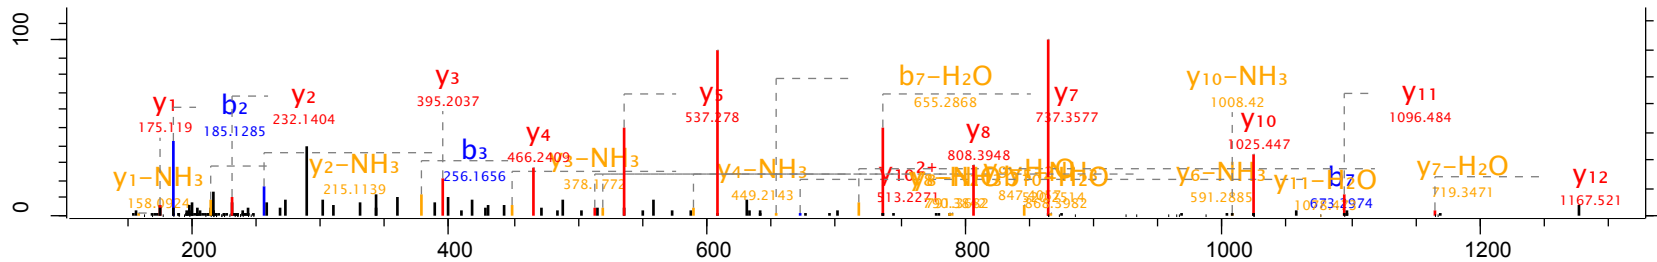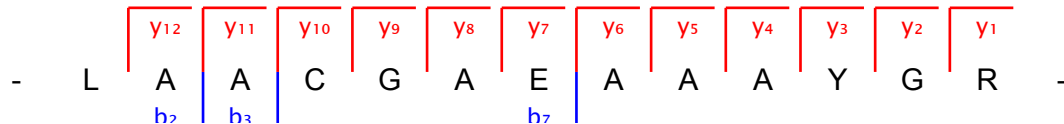

Raw file

Scan

Method

Score

m/z

Gene names

20141014\_fract5\_dyn\_5ul\_E5\_01\_584

23325

TOF; CID

72.34

648.29

PFDN4

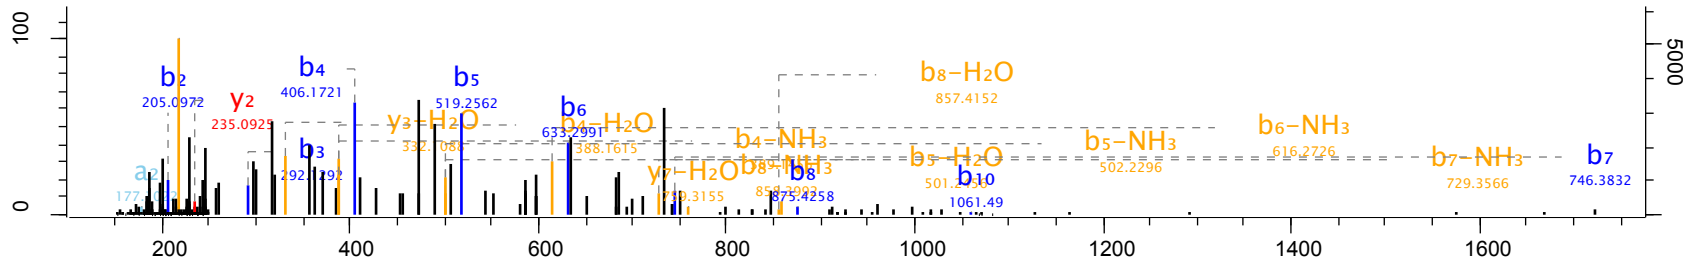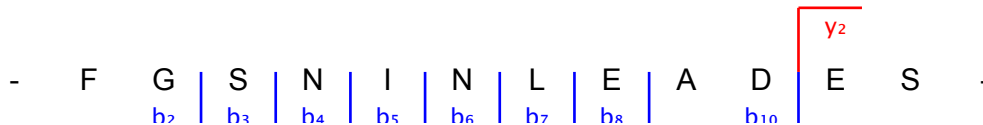

| Raw file                          | Scan  | Method   | Score  | m/z    | Gene names |
|-----------------------------------|-------|----------|--------|--------|------------|
| 20141014_fract5_dyn_5ul_E5_01_584 | 28067 | TOF; CID | 143.28 | 504.72 | TMEM258    |

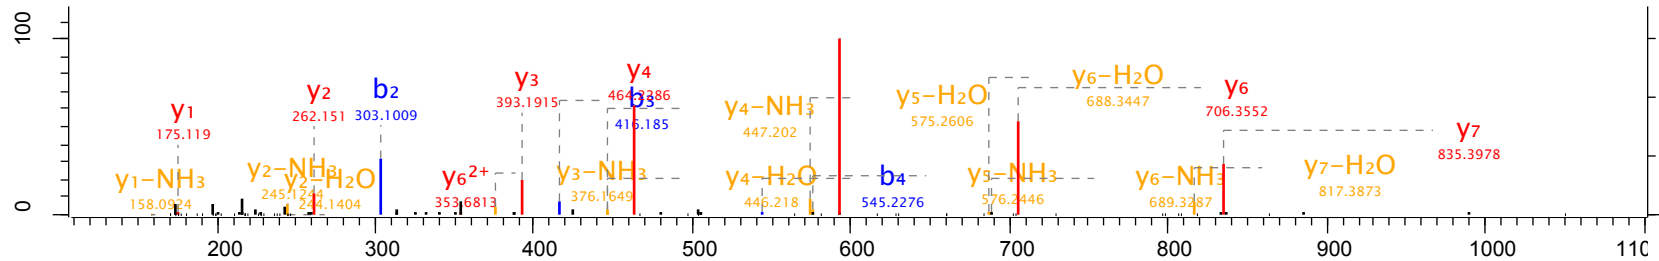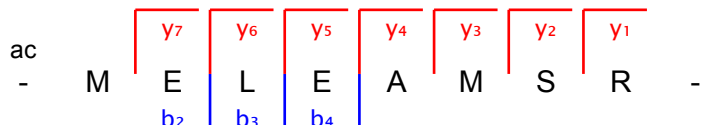

[1e4]

Raw file

20141014\_fract5\_dyn\_5ul\_E5\_01\_584

Scan

31391

Method

TOF; CID

Score

61.94

m/z

725.35

Gene names

PRR3

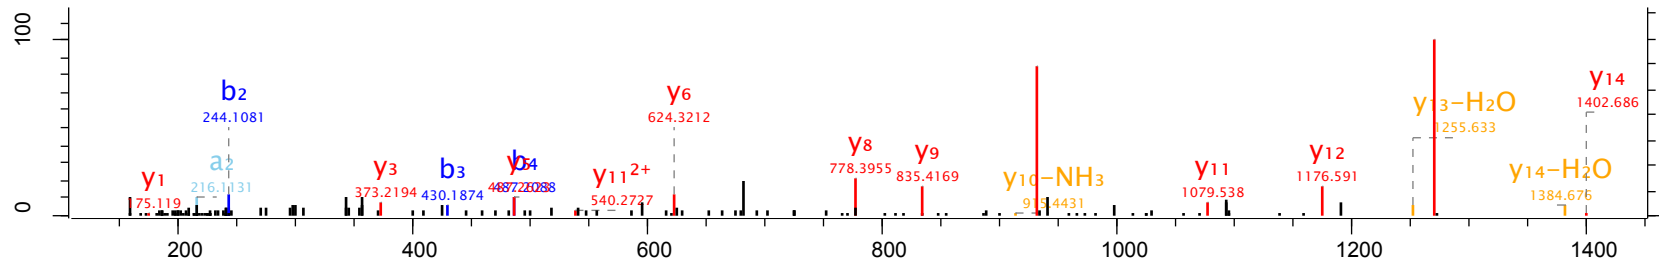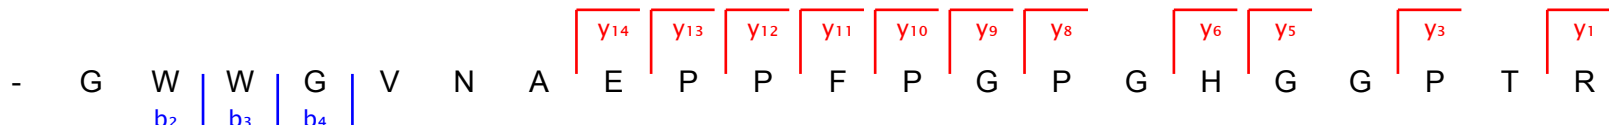

Raw file

20141014\_fract5\_dyn\_5ul\_E5\_01\_584

Scan

34718

Method

TOF; CID

Score

35.54

m/z

860.41

Gene names

ADPRM

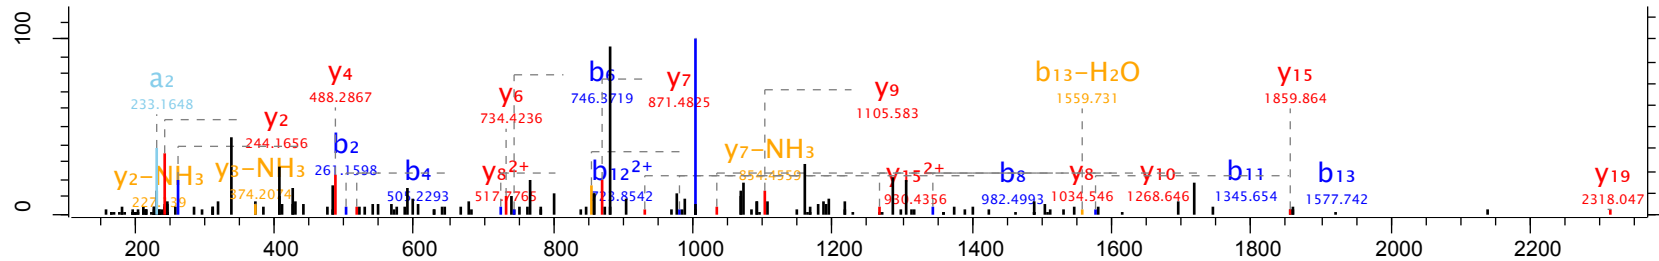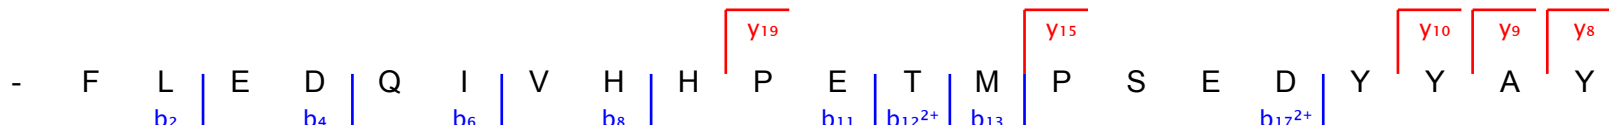



Raw file

20141014\_fract7\_dyn\_5ul\_E7\_01\_586

Scan

4604

Method

TOF; CID

Score

55.72

m/z

506.59

Gene names

STOX2;GDAP1

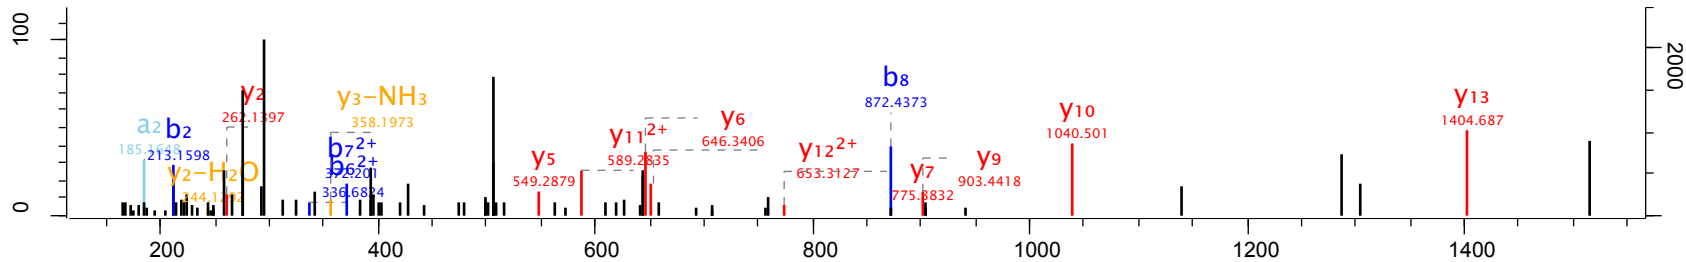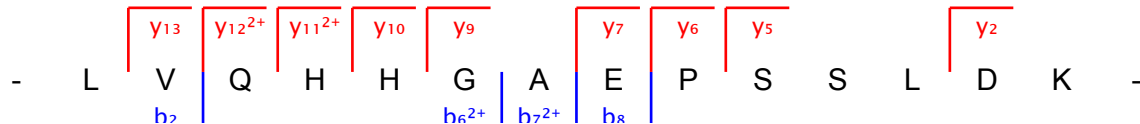

Raw file

20141014\_fract7\_dyn\_5ul\_E7\_01\_586

Scan

7247

Method

TOF; CID

Score

121.86

m/z

629.33

Gene names

CXCR4

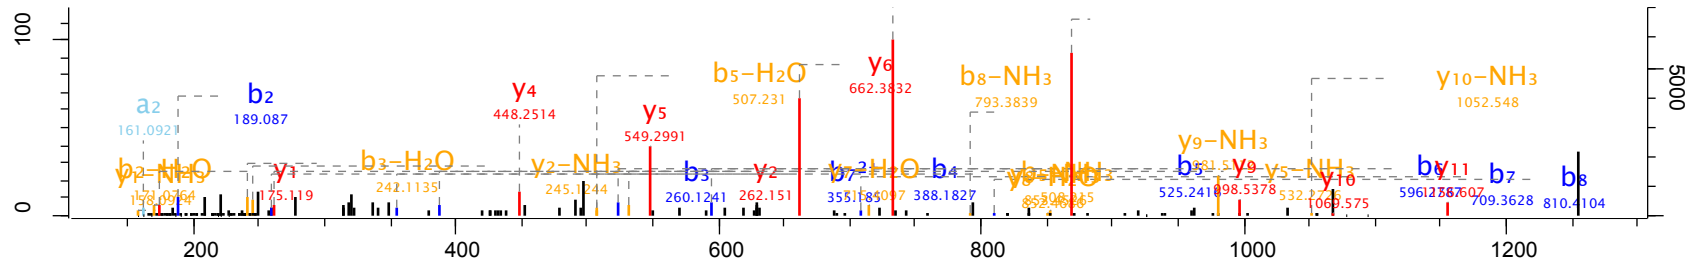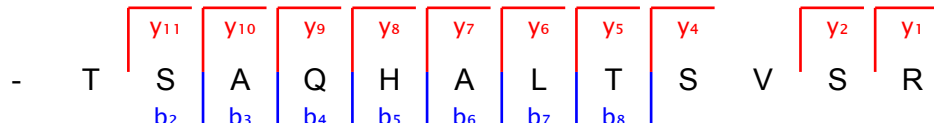

Raw file

20141014\_fract7\_dyn\_5ul\_E7\_01\_586

Scan

12817

Method

TOF; CID

Score

77.6

m/z

619.29

Gene names

USP53

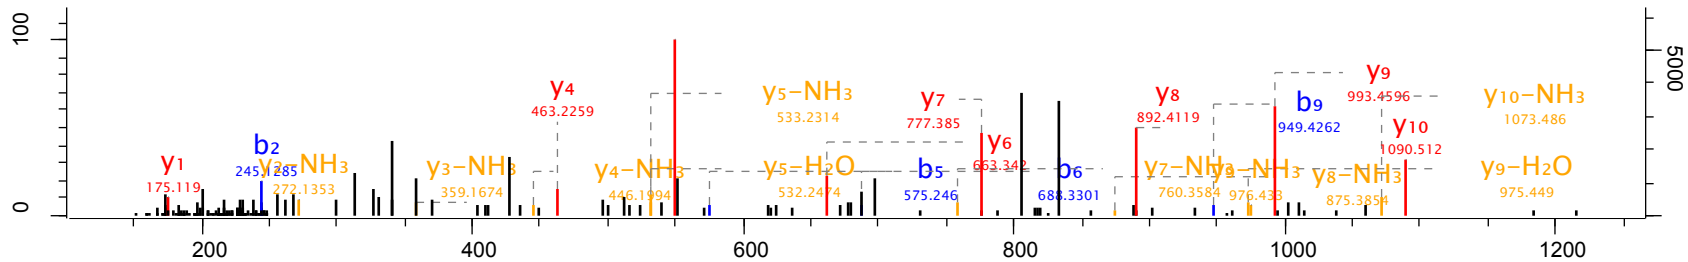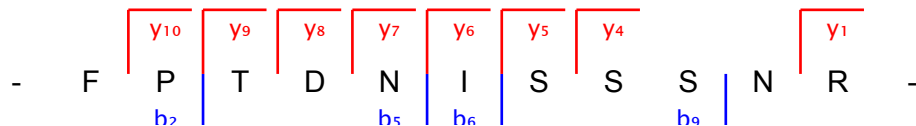

| Raw file                          | Scan  | Method   | Score | m/z   | Gene names |
|-----------------------------------|-------|----------|-------|-------|------------|
| 20141014_fract7_dyn_5ul_E7_01_586 | 29994 | TOF; CID | 63.29 | 778.4 | TBC1D16    |

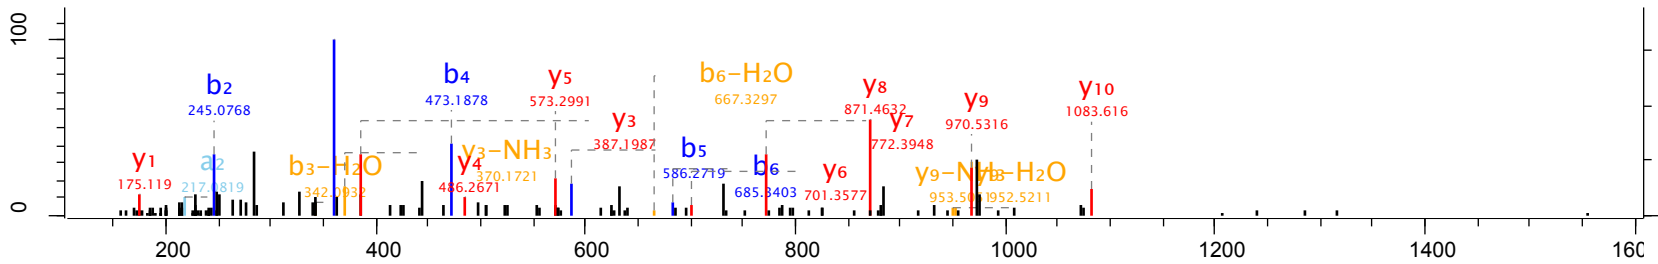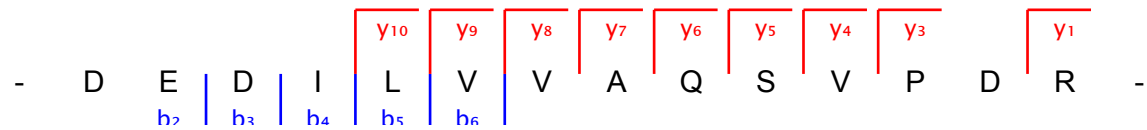

Raw file

20141014\_fract7\_dyn\_5ul\_E7\_01\_586

Scan

37190

Method

TOF; CID

Score

93.23

m/z

892.49

Gene names

PPP1R3F

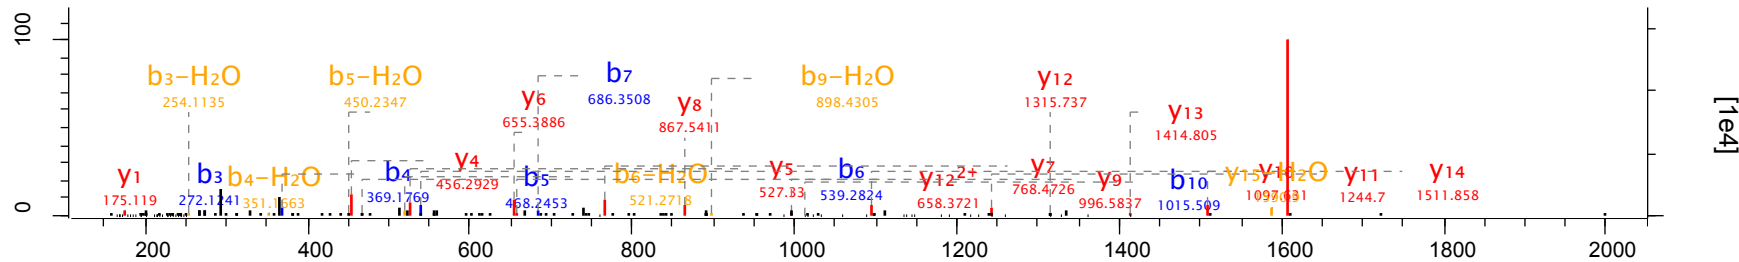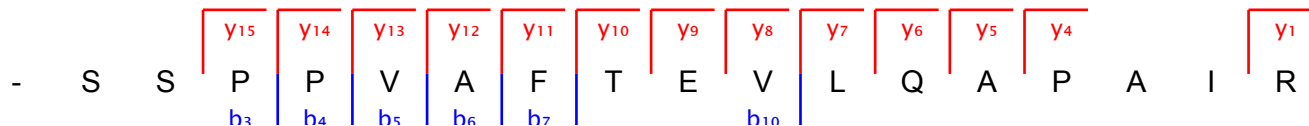

Raw file

20141014\_fract8\_dyn\_5ul\_E8\_01\_587

Scan

13435

Method

TOF; CID

Score

68.52

m/z

656.35

Gene names

UCP2

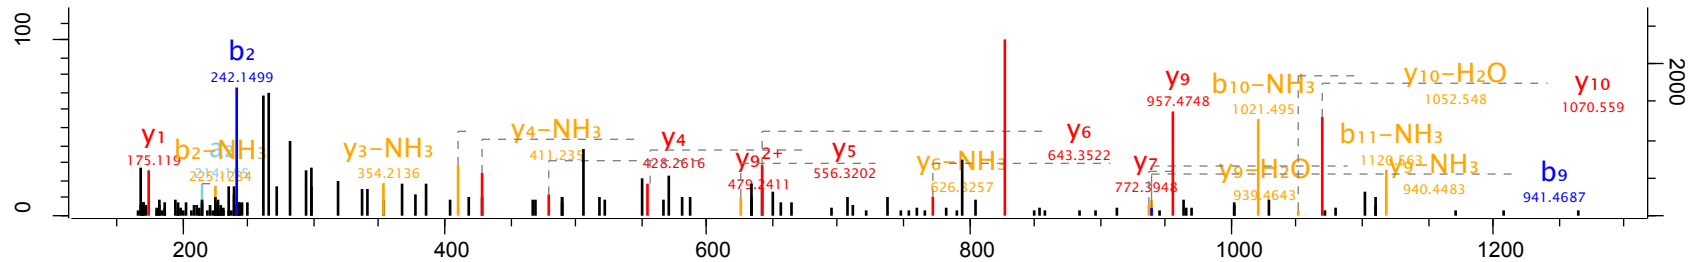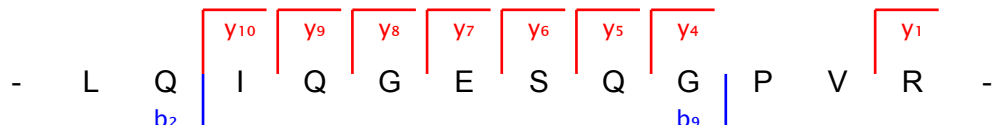

| Raw file                          | Scan  | Method   | Score | m/z    | Gene names |
|-----------------------------------|-------|----------|-------|--------|------------|
| 20141014_fract8_dyn_5ul_E8_01_587 | 17469 | TOF; CID | 94.82 | 566.29 | C6orf57    |

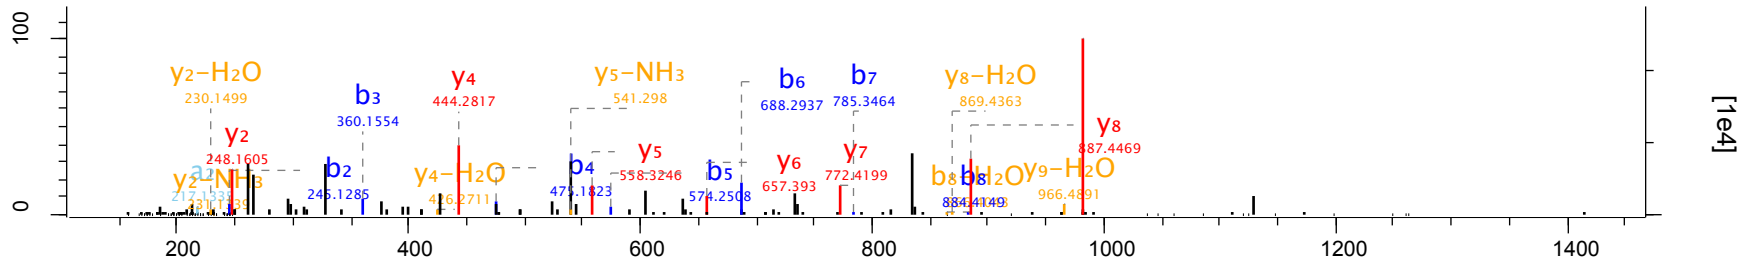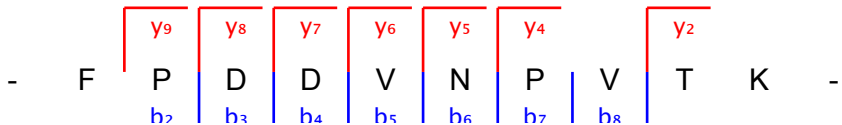

Raw file

20141014\_fract8\_dyn\_5ul\_E8\_01\_587

Scan

23332

Method

TOF; CID

Score

61.11

m/z

670.36

Gene names

CSTA

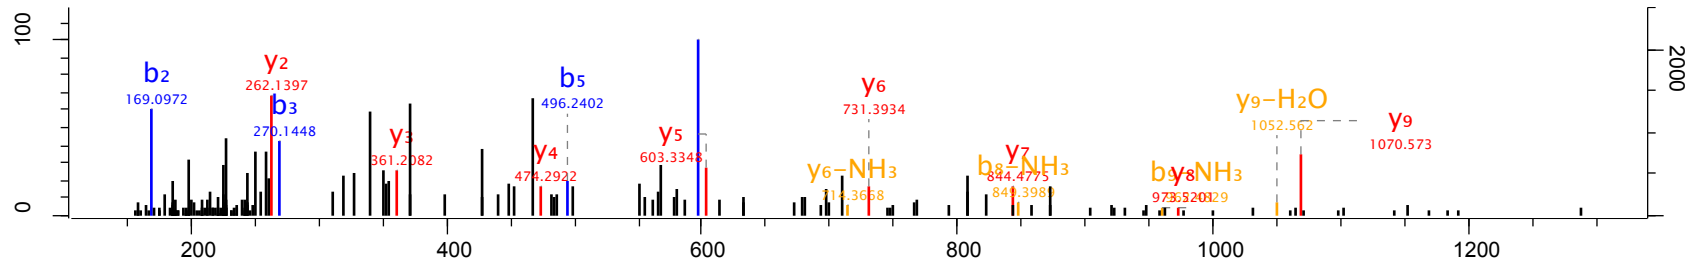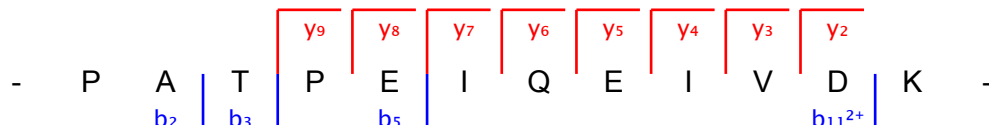



Raw file

20141014\_fract8\_dyn\_5ul\_E8\_01\_587

Scan

25841

Method

TOF; CID

Score

102.07

m/z

502.27

Gene names

PGM5

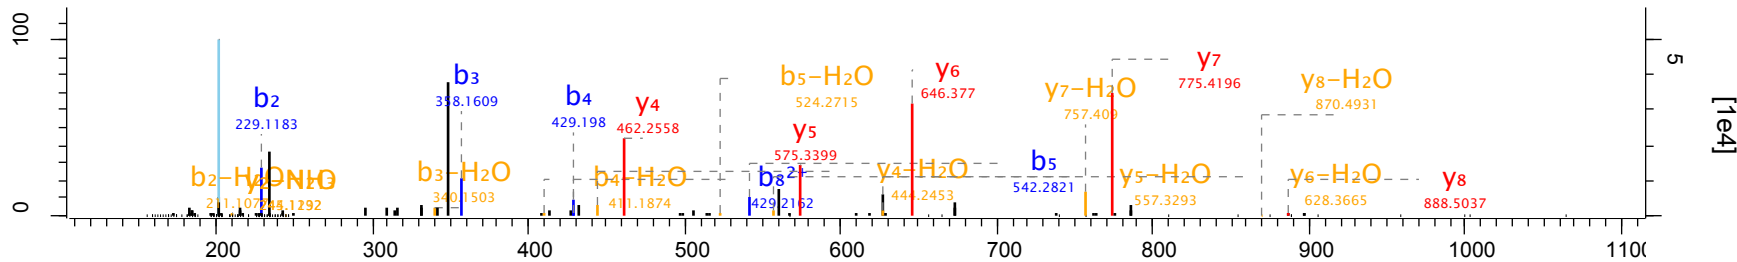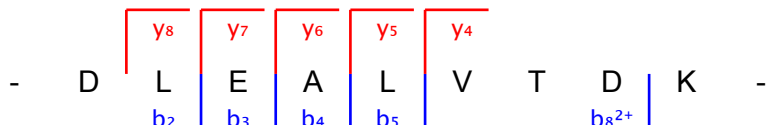

Raw file

20141014\_fract8\_dyn\_5ul\_E8\_01\_587

Scan

29898

Method

TOF; CID

Score

113.42

m/z

1173.05

Gene names

PKIG

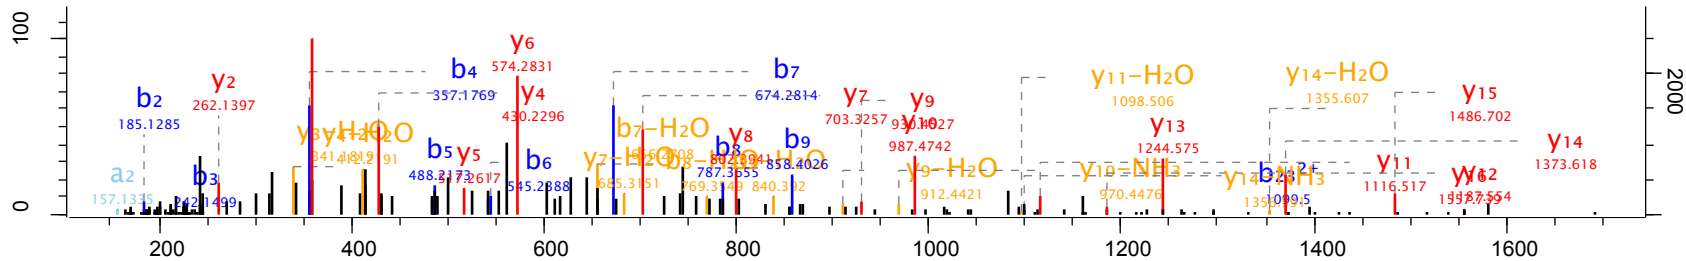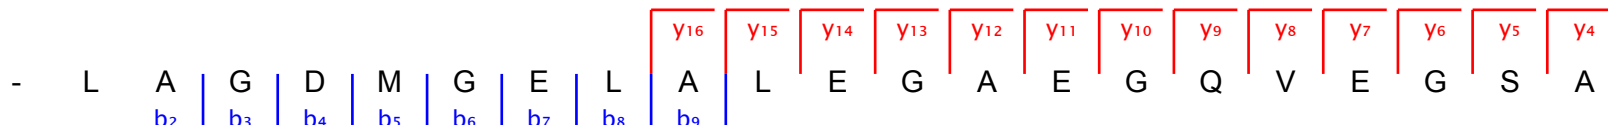

| Raw file                          | Scan  | Method   | Score | m/z    | Gene names |
|-----------------------------------|-------|----------|-------|--------|------------|
| 20141014_fract8_dyn_5ul_E8_01_587 | 36842 | TOF; CID | 80.24 | 497.58 | KCTD7      |

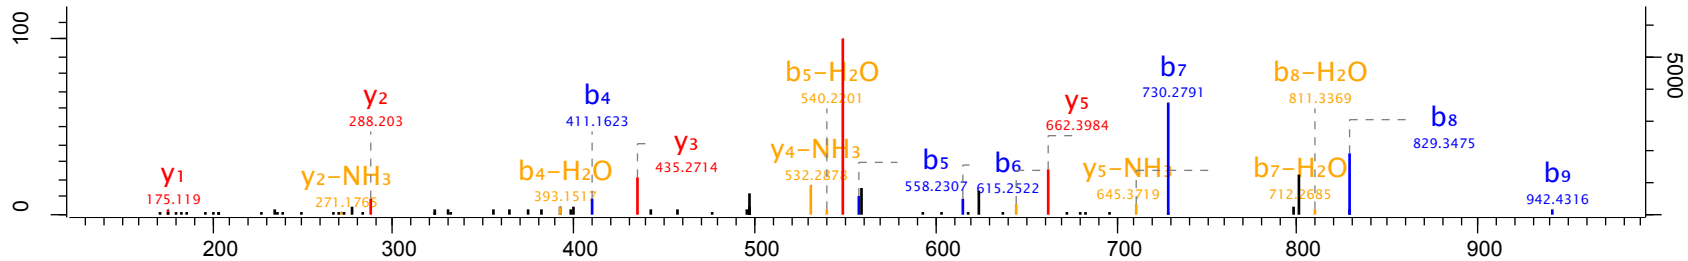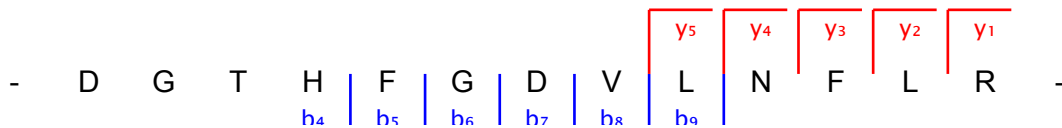

| Raw file                          | Scan  | Method   | Score | m/z    | Gene names |
|-----------------------------------|-------|----------|-------|--------|------------|
| 20141014_fract8_dyn_5ul_E8_01_587 | 38691 | TOF; CID | 54.28 | 729.39 | IDNK       |

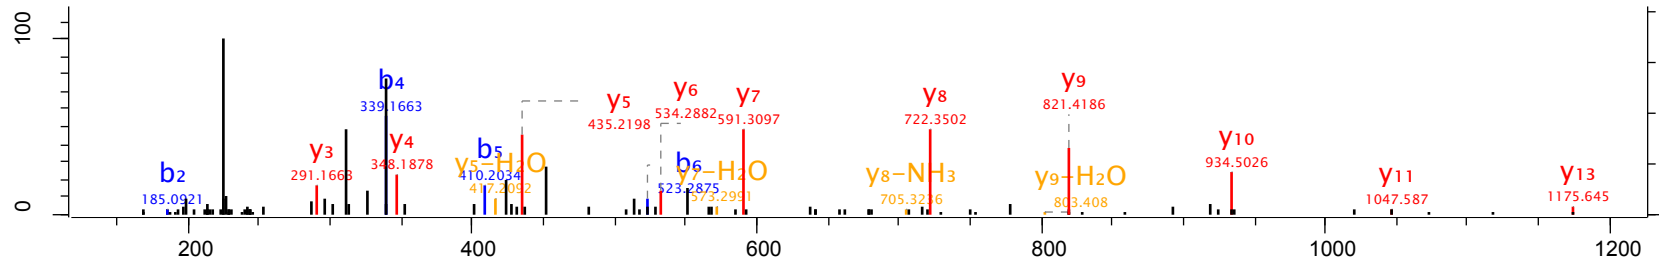

ac

- A A | P G | A L | L V | M G | V S | G S G K -

          b<sub>2</sub>          b<sub>4</sub> | b<sub>5</sub> | b<sub>6</sub>          y<sub>13</sub>          y<sub>11</sub> | y<sub>10</sub> | y<sub>9</sub> | y<sub>8</sub> | y<sub>7</sub> | y<sub>6</sub> | y<sub>5</sub> | y<sub>4</sub> | y<sub>3</sub>

Raw file

20141014\_fract9\_dyn\_5ul\_F1\_01\_588

Scan

25104

Method

TOF; CID

Score

93.32

m/z

632.34

Gene names

CKLF

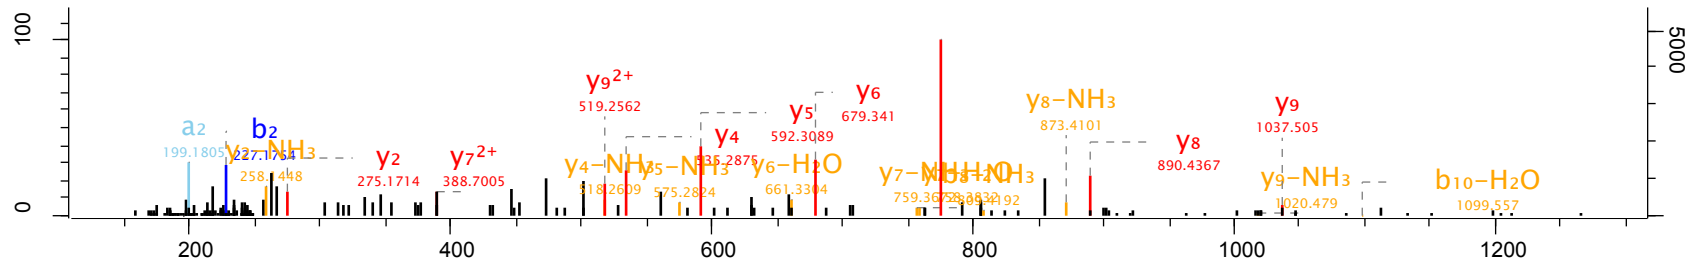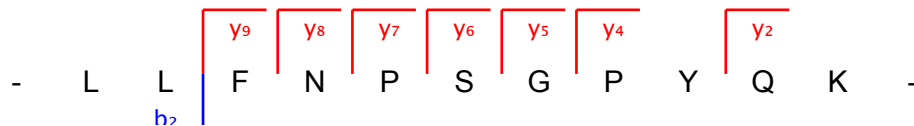

| Raw file                          | Scan  | Method   | Score  | m/z    | Gene names |
|-----------------------------------|-------|----------|--------|--------|------------|
| 20141014_fract9_dyn_5ul_F1_01_588 | 30140 | TOF; CID | 111.95 | 529.28 | SLC9A8     |

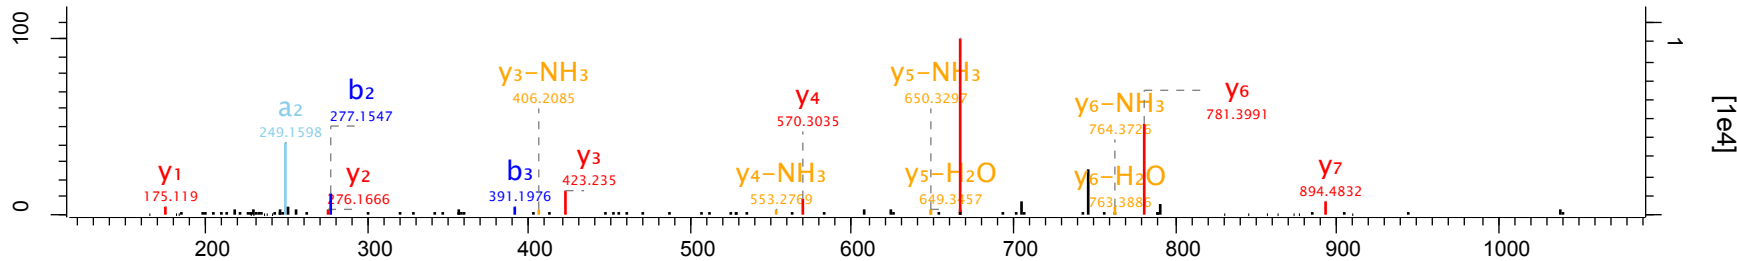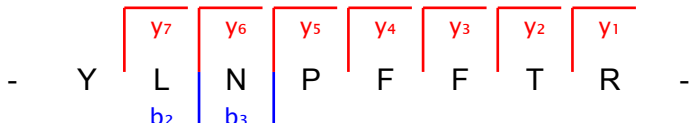

Raw file

20141014\_fract9\_dyn\_5ul\_F1\_01\_588

Scan

38402

Method

TOF; CID

Score

34.04

m/z

1150.89

Gene names

ZAN

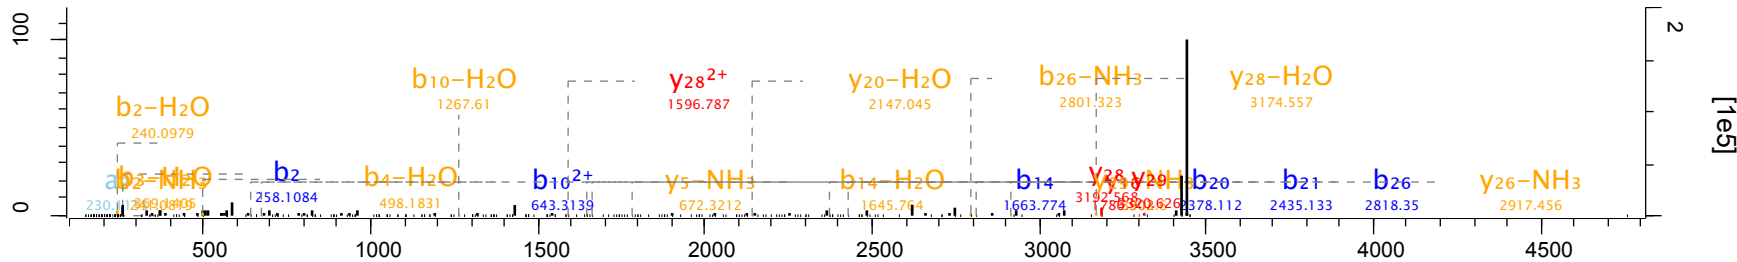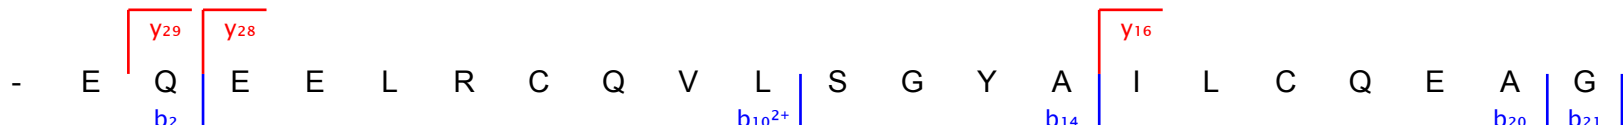

Raw file

20141014\_fract10\_dyn\_5ul\_F2\_01\_589

Scan

16187

Method

TOF; CID

Score

86.46

m/z

432.9

Gene names

NDUFC1

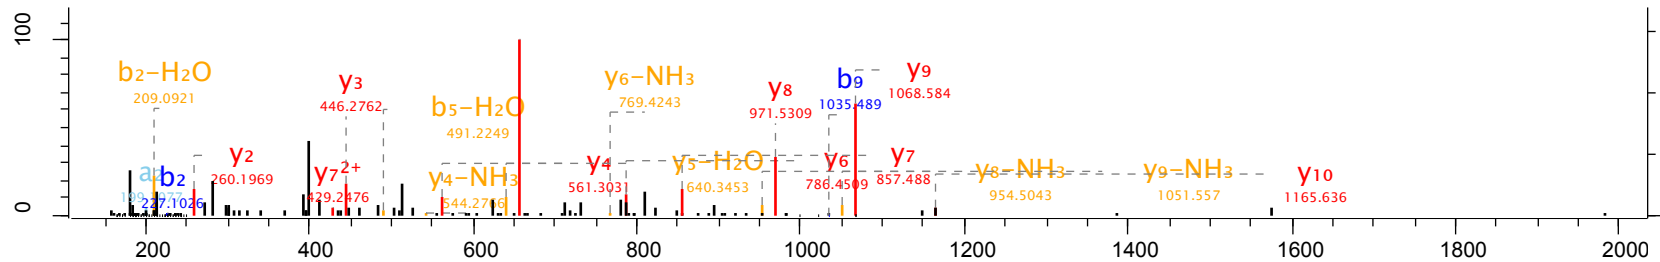

[1e4]

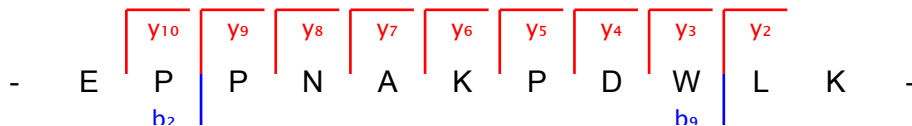



Raw file

20141014\_fract10\_dyn\_5ul\_F2\_01\_589

Scan

23140

Method

TOF; CID

Score

71.08

m/z

617.3

Gene names

TMEM104

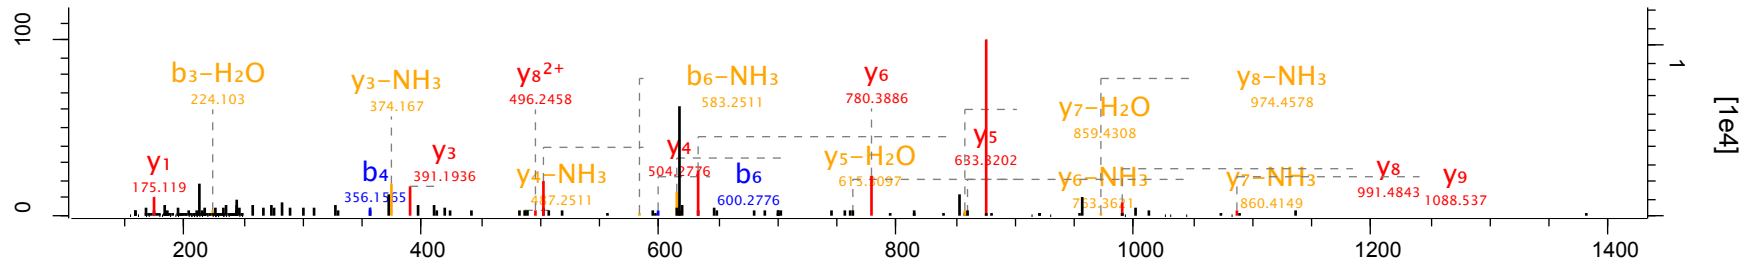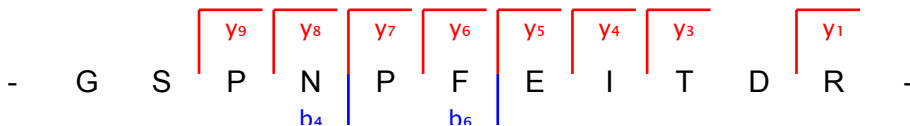

Raw file

Scan

Method

Score

m/z

Gene names

20141014\_fract10\_dyn\_5ul\_F2\_01\_589

37241

TOF; CID

118.37

1351.63

SMAGP

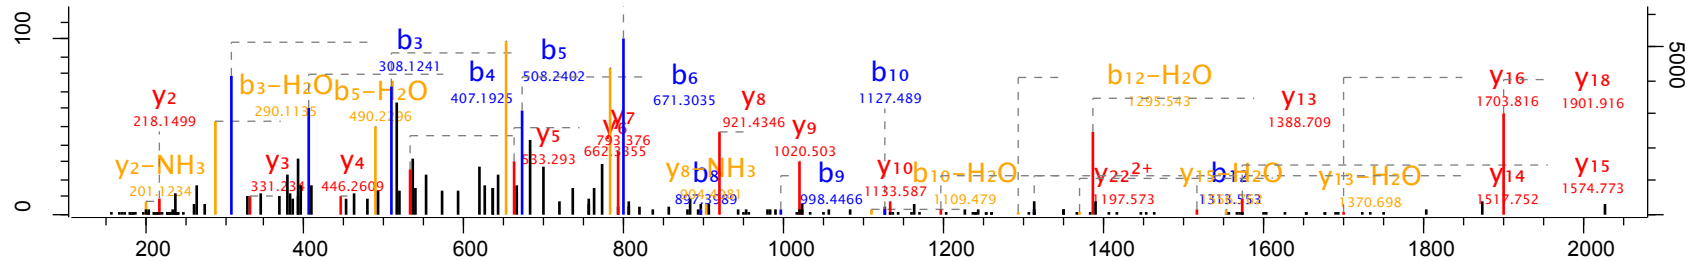

- G S Y V T Y E P T E G E P S A I V Q M E S

Fragmentation patterns (b and y ions) are indicated by brackets below the sequence:

- b<sub>3</sub> (under Y)
- b<sub>4</sub> (under V)
- b<sub>5</sub> (under T)
- b<sub>6</sub> (under Y)
- b<sub>7</sub> (under E)
- b<sub>8</sub> (under P)
- b<sub>9</sub> (under T)
- b<sub>10</sub> (under E)
- b<sub>12</sub> (under E)
- y<sub>5</sub> (under S)
- y<sub>6</sub> (under E)
- y<sub>7</sub> (under M)
- y<sub>8</sub> (under Q)
- y<sub>9</sub> (under V)
- y<sub>10</sub> (under I)
- y<sub>13</sub> (under P)
- y<sub>14</sub> (under E)
- y<sub>15</sub> (under G)
- y<sub>16</sub> (under E)
- y<sub>18</sub> (under P)
- y<sub>22</sub><sup>2+</sup> (under V)

Raw file

20141014\_fract10\_dyn\_5ul\_F2\_01\_589

Scan

41167

Method

TOF; CID

Score

36.55

m/z

1214.62

Gene names

DAZAP2

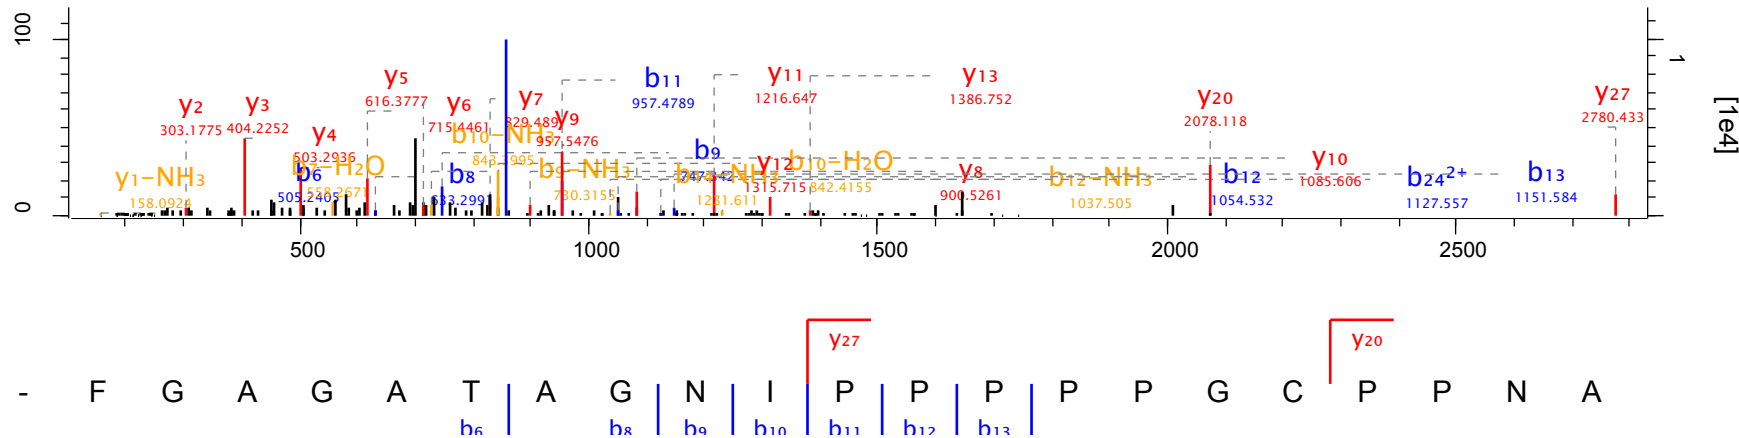

Raw file

20141014\_fract11\_dyn\_5ul\_F3\_01\_590

Scan

12591

Method

TOF; CID

Score

58.89

m/z

463.02

Gene names

ADAMTS15

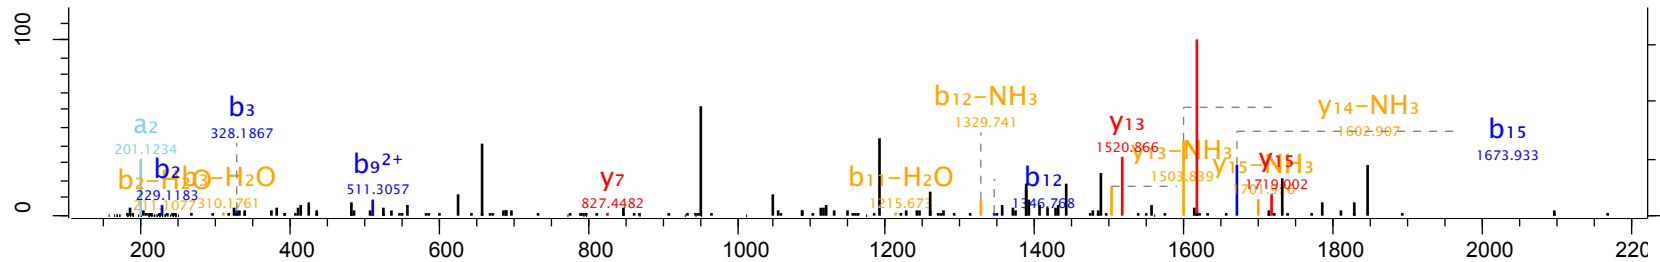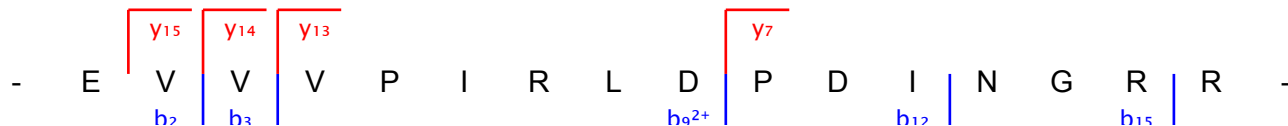

Raw file

20141014\_fract11\_dyn\_5ul\_F3\_01\_590

Scan

14078

Method

TOF; CID

Score

152.34

m/z

497.26

Gene names

AKR1D1

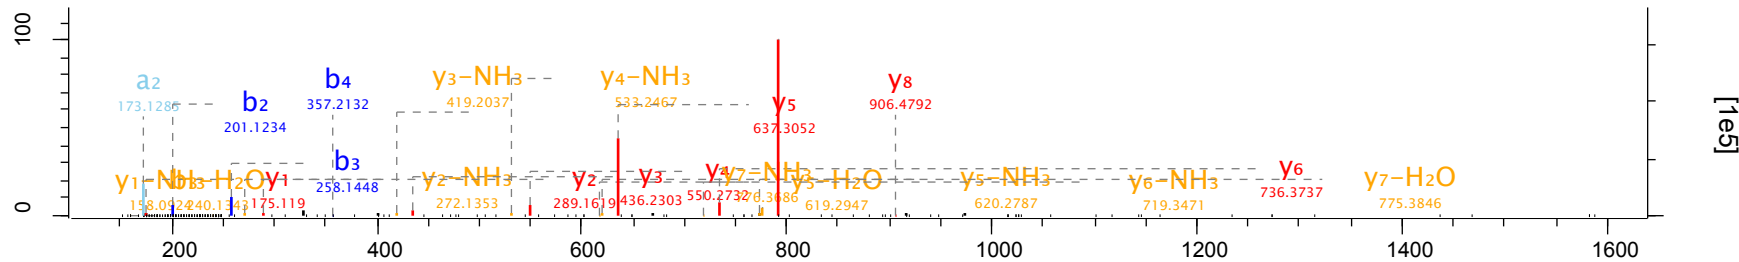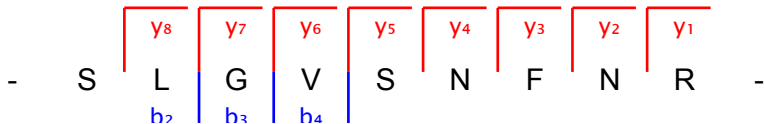

| Raw file                           | Scan  | Method   | Score  | m/z   | Gene names |
|------------------------------------|-------|----------|--------|-------|------------|
| 20141014_fract12_dyn_5ul_F4_01_591 | 12895 | TOF; CID | 151.07 | 586.8 | SULT1E1    |

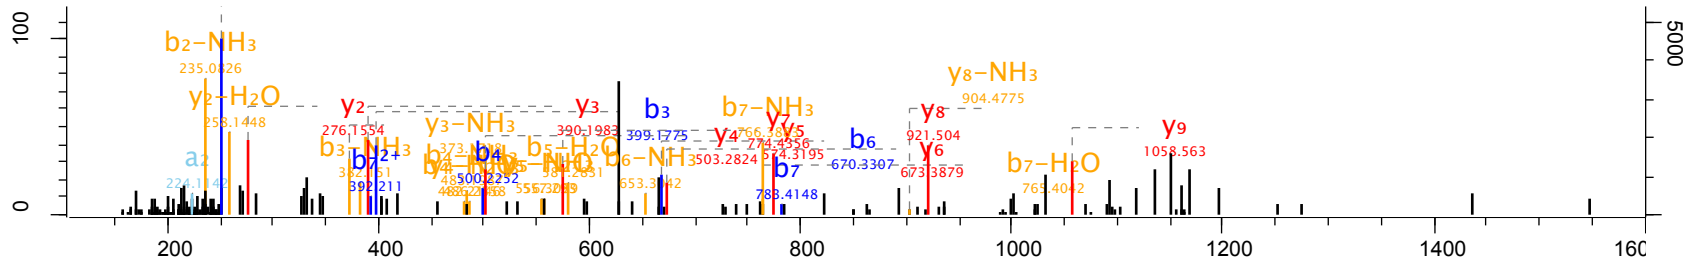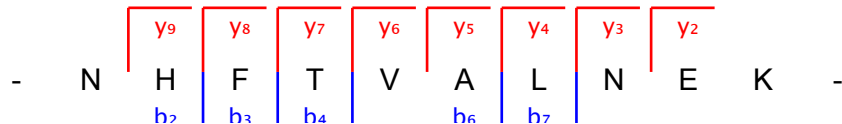

| Raw file                           | Scan  | Method   | Score | m/z    | Gene names |
|------------------------------------|-------|----------|-------|--------|------------|
| 20141014_fract12_dyn_5ul_F4_01_591 | 15999 | TOF; CID | 93.6  | 479.27 | SLIT1      |

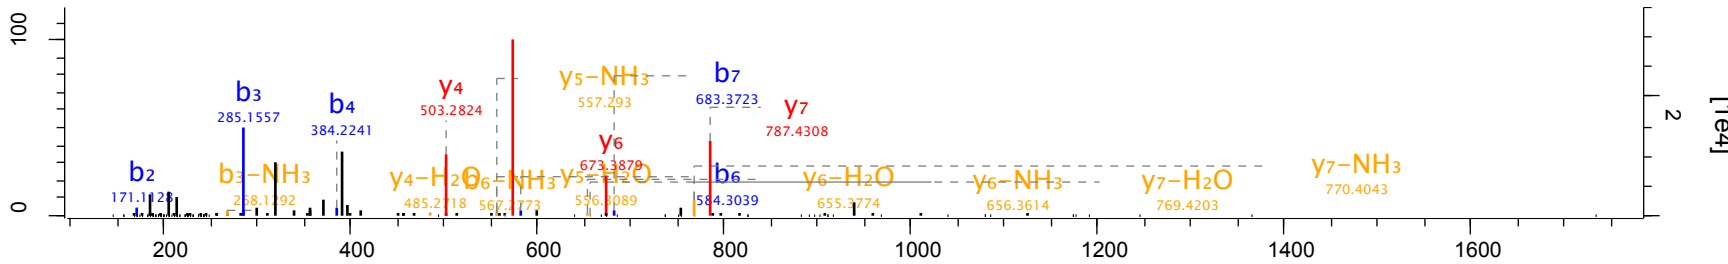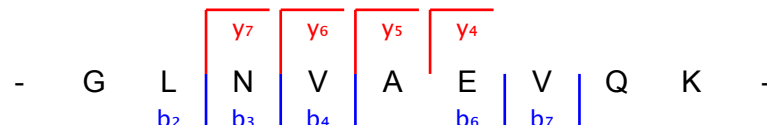

Raw file

20141014\_fract12\_dyn\_5ul\_F4\_01\_591

Scan

28389

Method

TOF; CID

Score

121.56

m/z

710.84

Gene names

SLC39A13

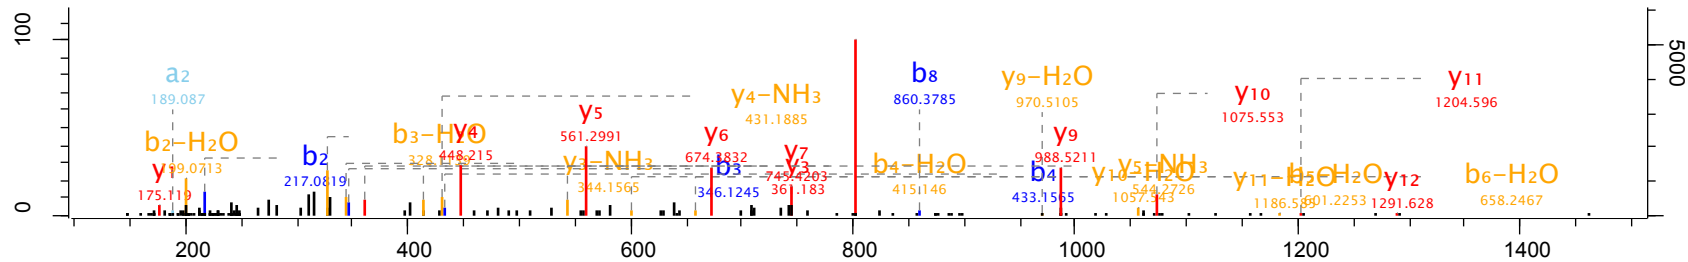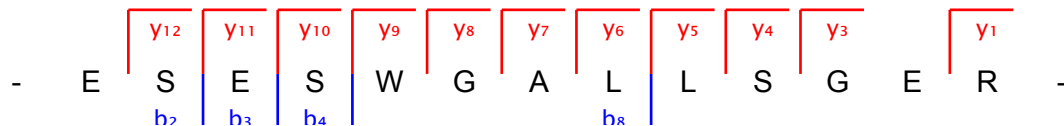



Raw file

20141014\_fract12\_dyn\_5ul\_F4\_01\_591

Scan

34915

Method

TOF; CID

Score

140.2

m/z

666.09

Gene names

SLC39A8

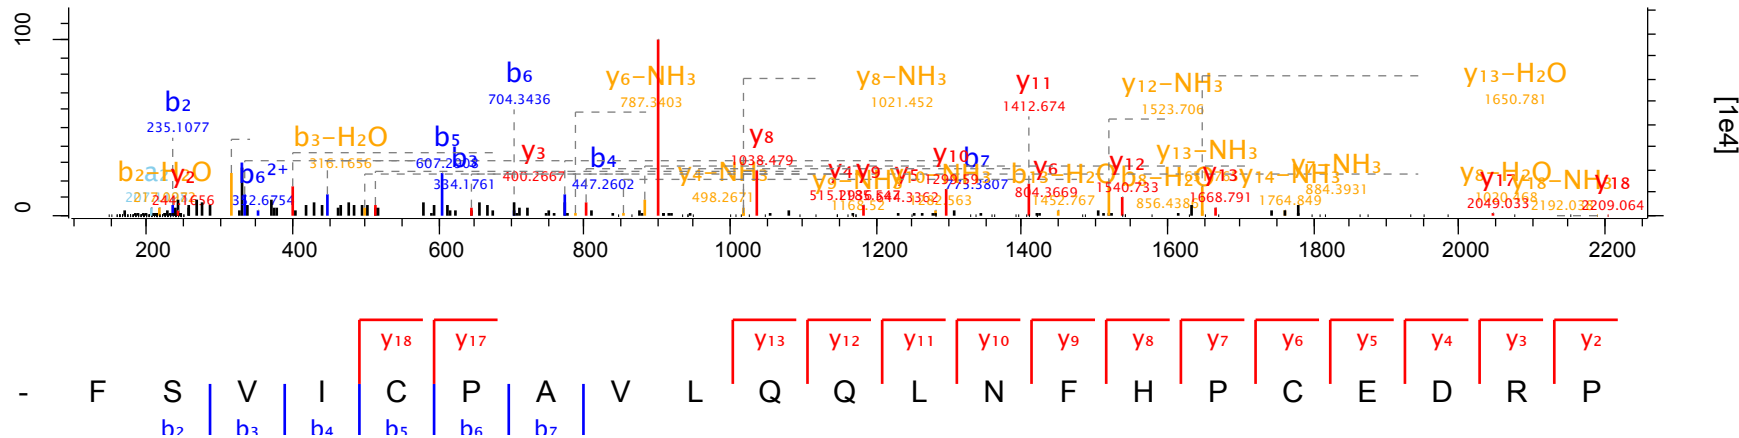

Raw file

20141014\_fract12\_dyn\_5ul\_F4\_01\_591

Scan

37009

Method

TOF; CID

Score

41.26

m/z

546.79

Gene names

S100A12

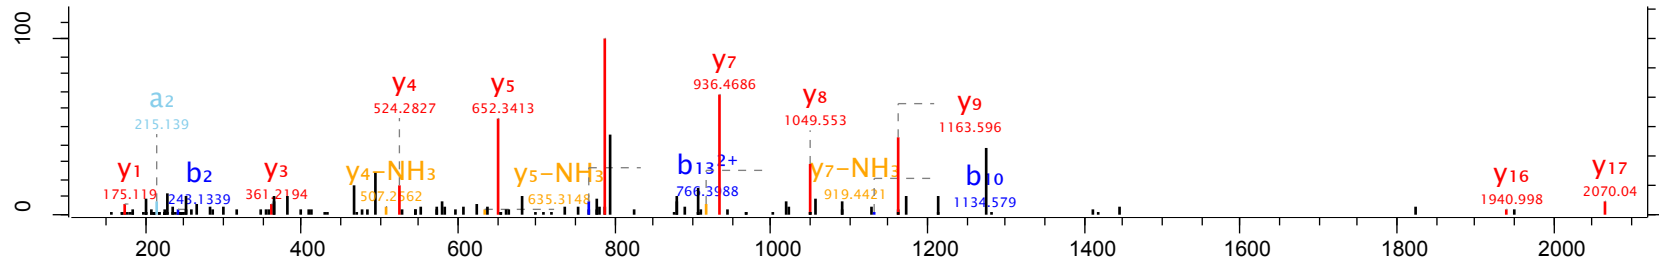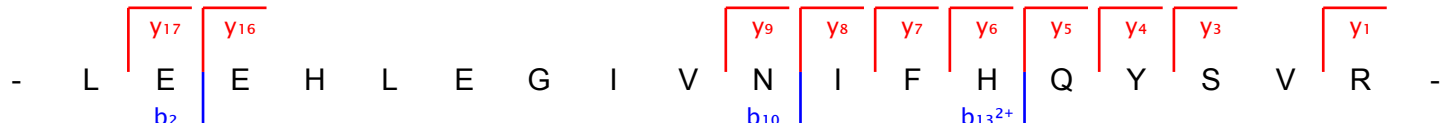

| Raw file                           | Scan  | Method   | Score  | m/z    | Gene names |
|------------------------------------|-------|----------|--------|--------|------------|
| 20141014_fract12_dyn_5ul_F4_01_591 | 38365 | TOF; CID | 128.22 | 821.44 | ATP6V0D2   |

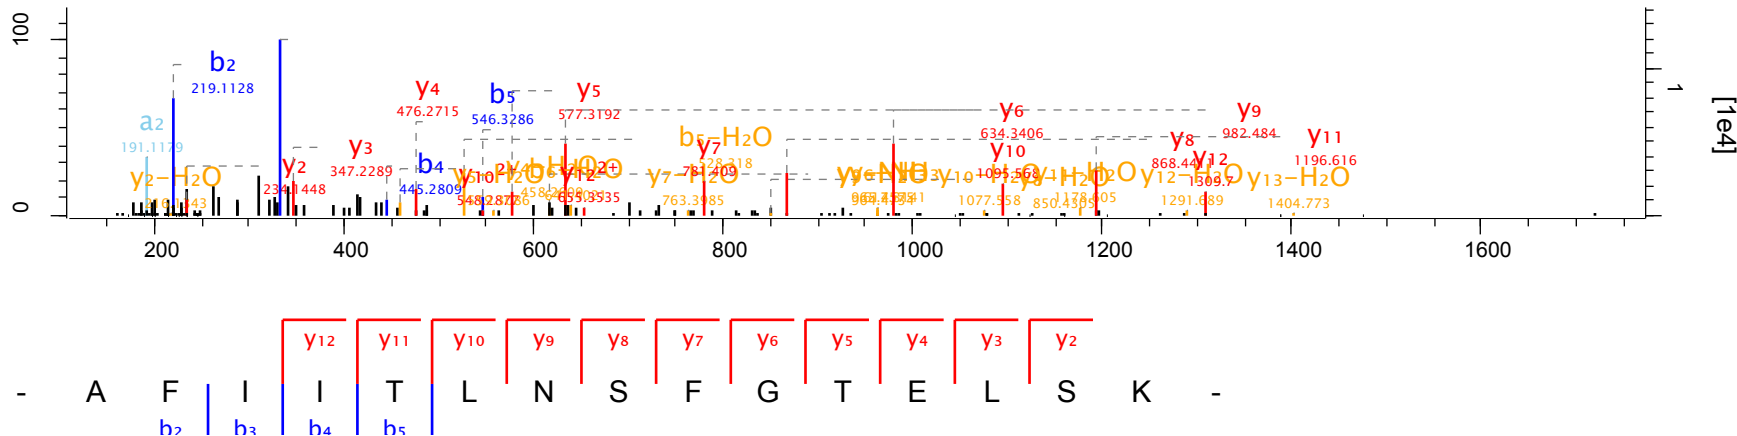

| Raw file                           | Scan  | Method   | Score | m/z    | Gene names |
|------------------------------------|-------|----------|-------|--------|------------|
| 20141014_fract12_dyn_5ul_F4_01_591 | 38881 | TOF; CID | 53.3  | 712.44 | SLC36A1    |

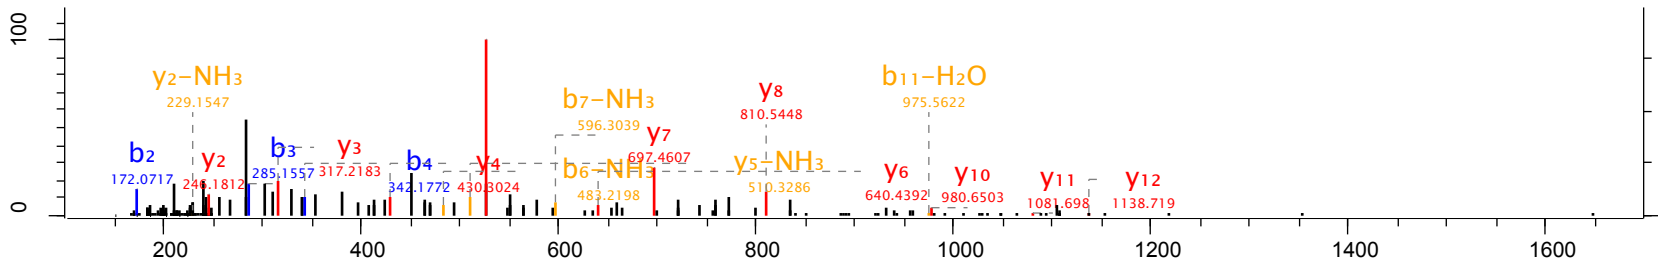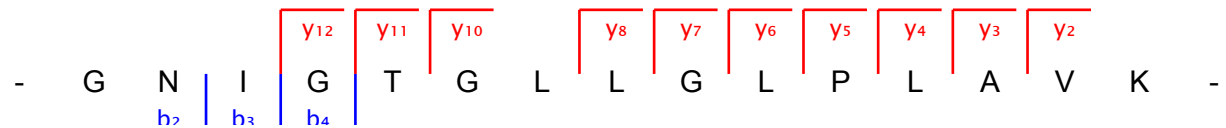

| Raw file                           | Scan  | Method   | Score | m/z    | Gene names |
|------------------------------------|-------|----------|-------|--------|------------|
| 20141014_fract13_dyn_5ul_F5_01_592 | 29425 | TOF; CID | 78.67 | 800.41 | ATMIN      |

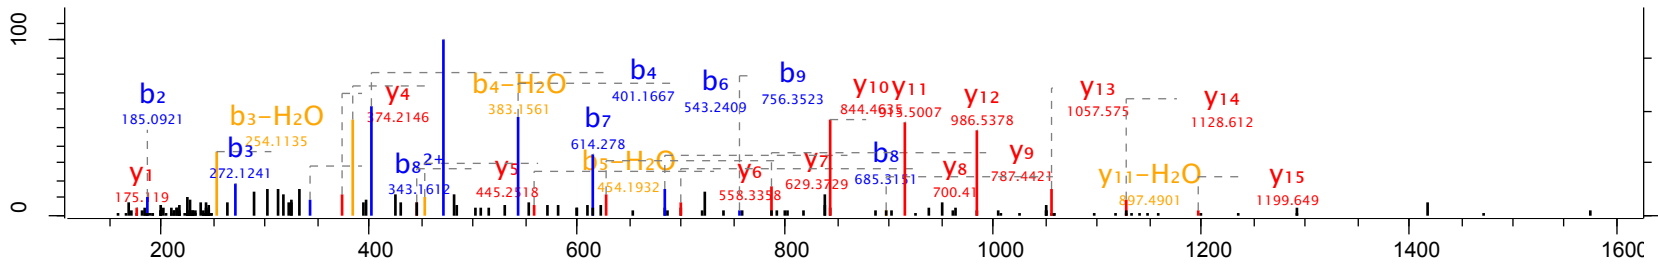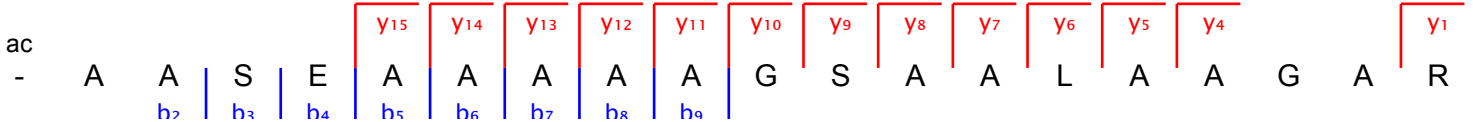

Raw file

20141014\_fract13\_dyn\_5ul\_F5\_01\_592

Scan

37719

Method

TOF; CID

Score

60.55

m/z

748.44

Gene names

SIM2;SIM1

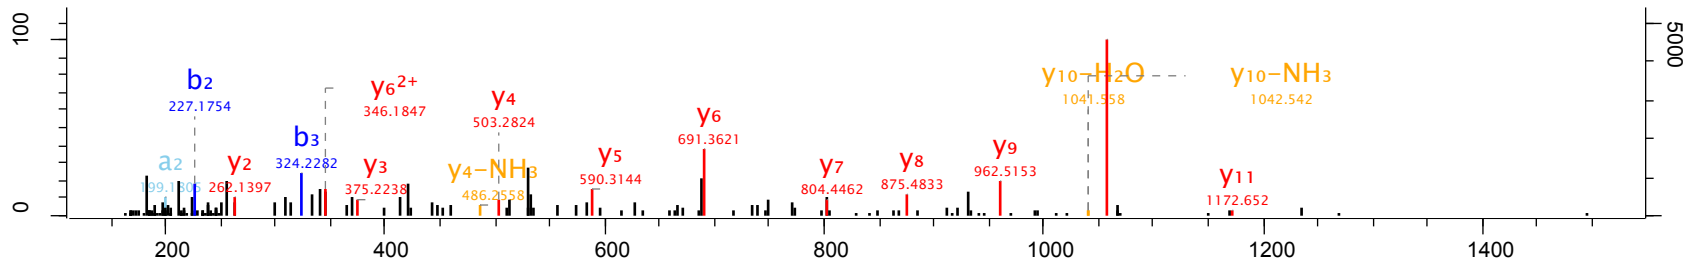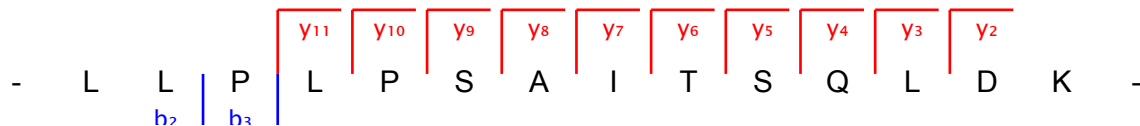

Raw file

20141014\_fract14\_dyn\_5ul\_F6\_01\_593

Scan

10326

Method

TOF; CID

Score

65.18

m/z

412.9

Gene names

ARRDC1-AS1

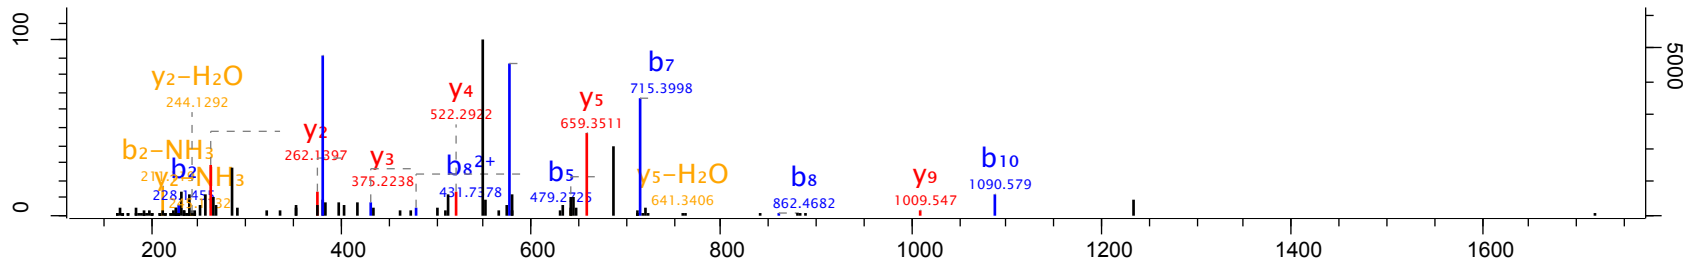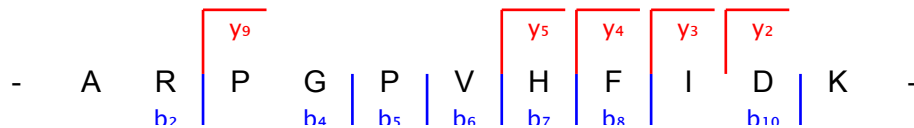

| Raw file                           | Scan  | Method   | Score | m/z    | Gene names |
|------------------------------------|-------|----------|-------|--------|------------|
| 20141014_fract14_dyn_5ul_F6_01_593 | 35876 | TOF; CID | 78.81 | 770.42 | NPL        |

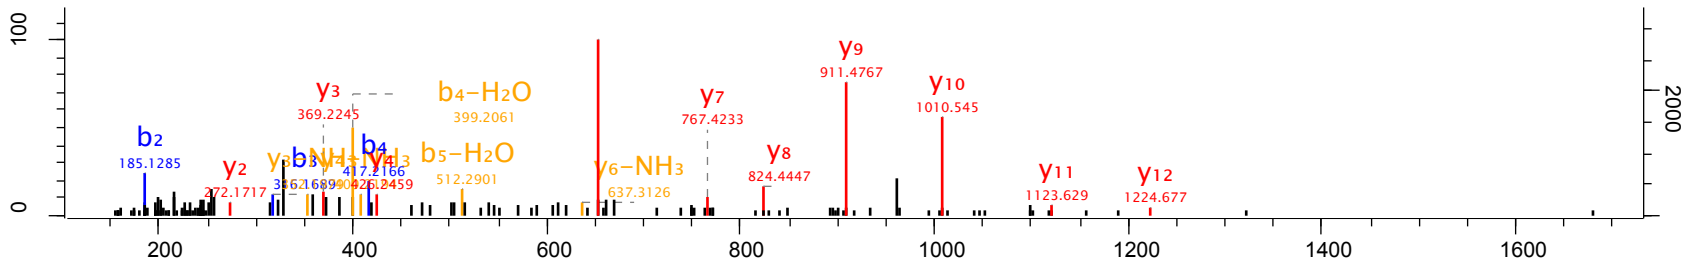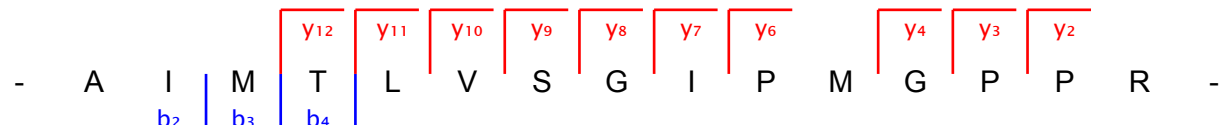



Raw file

20141014\_fract15\_dyn\_5ul\_F7\_01\_594

Scan

41392

Method

TOF; CID

Score

86.8

m/z

1029.03

Gene names

SLC50A1

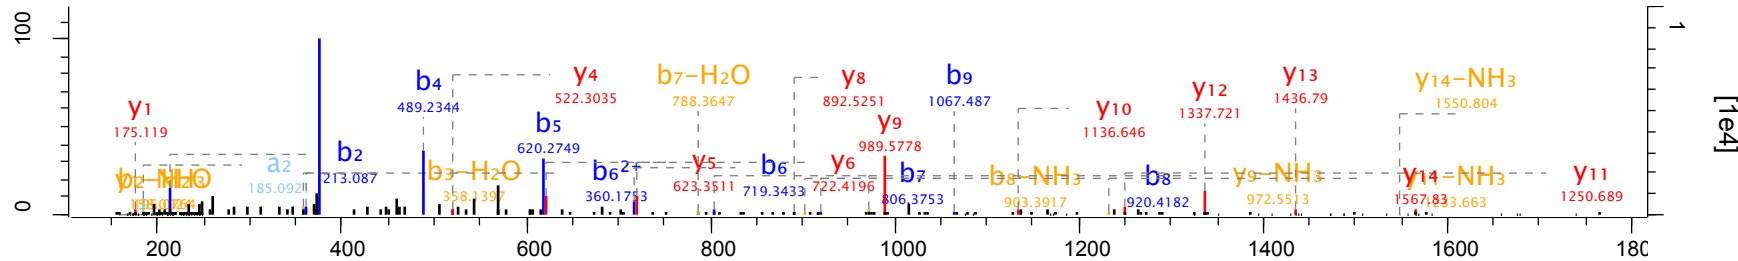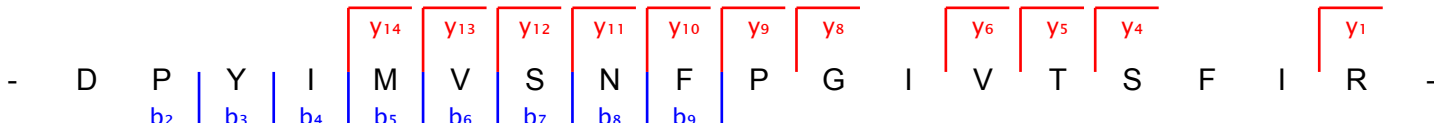

Raw file

20141014\_fract16\_dyn\_5ul\_F8\_01\_595

Scan

15923

Method

TOF; CID

Score

89.43

m/z

602.33

Gene names

DAZAP2

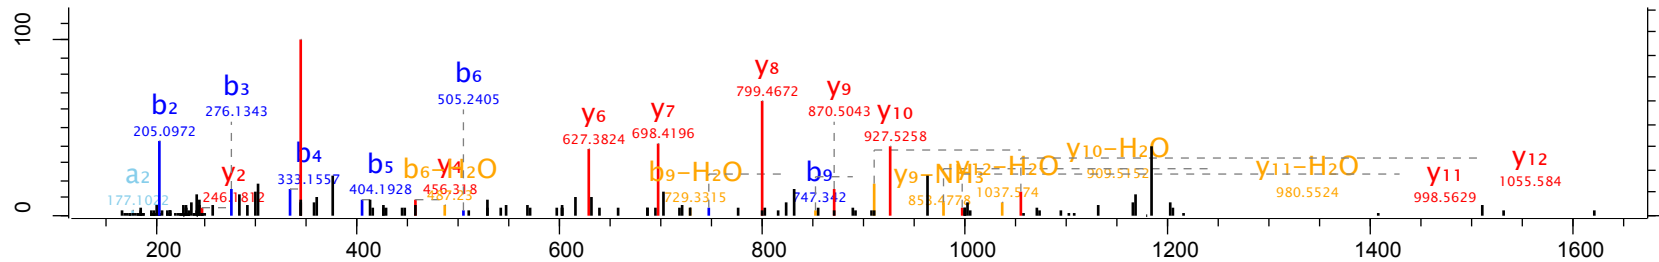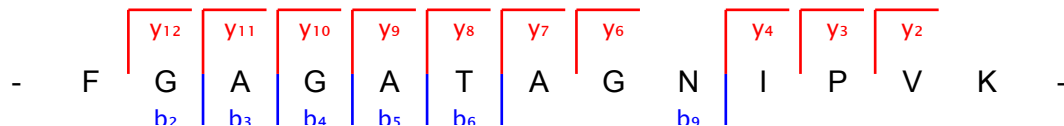

| Raw file                           | Scan  | Method   | Score | m/z     | Gene names |
|------------------------------------|-------|----------|-------|---------|------------|
| 20141014_fract16_dyn_5ul_F8_01_595 | 28148 | TOF; CID | 81.97 | 1010.09 | FAM199X    |

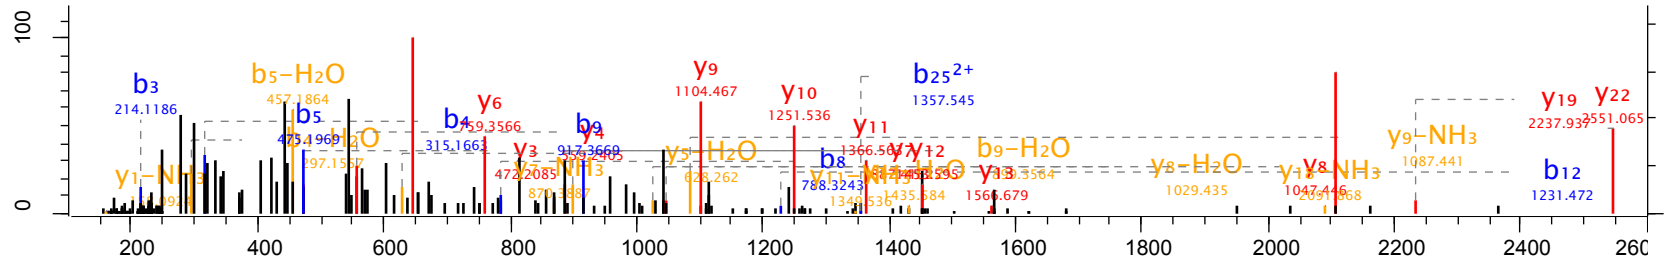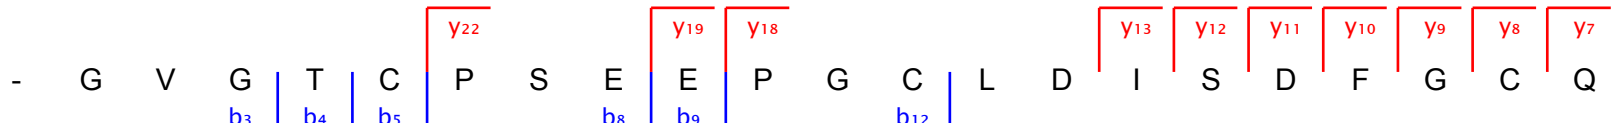

| Raw file                           | Scan  | Method   | Score | m/z    | Gene names |
|------------------------------------|-------|----------|-------|--------|------------|
| 20141014_fract17_dyn_5ul_G1_01_596 | 19333 | TOF; CID | 91.96 | 553.79 | C19orf43   |

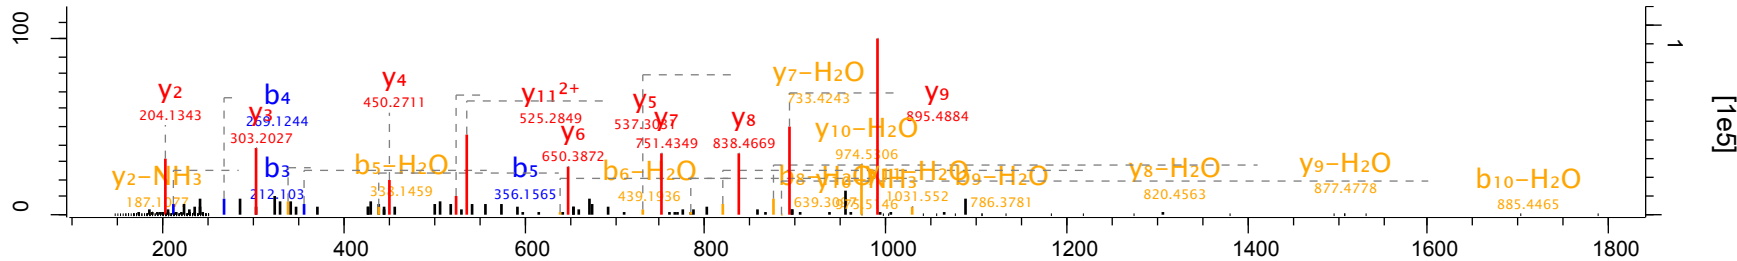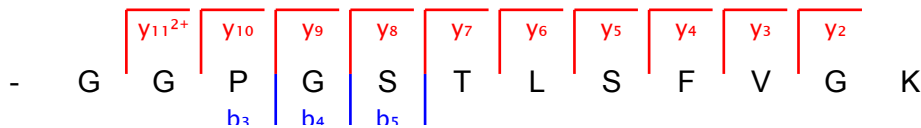

Raw file

20141014\_fract17\_dyn\_5ul\_G1\_01\_596

Scan

23833

Method

TOF; CID

Score

98.16

m/z

587.81

Gene names

SYNGR3

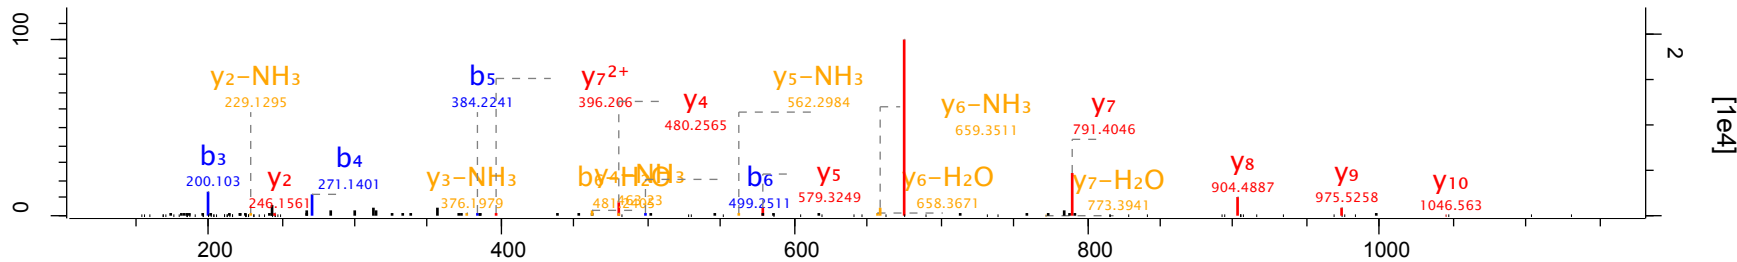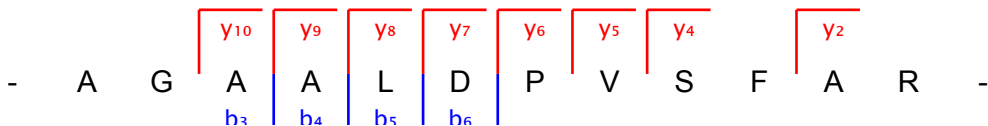

Raw file

20141014\_fract17\_dyn\_5ul\_G1\_01\_596

Scan

Method

Score

m/z

Gene names

27158

TOF; CID

64

930.47

HIAT1

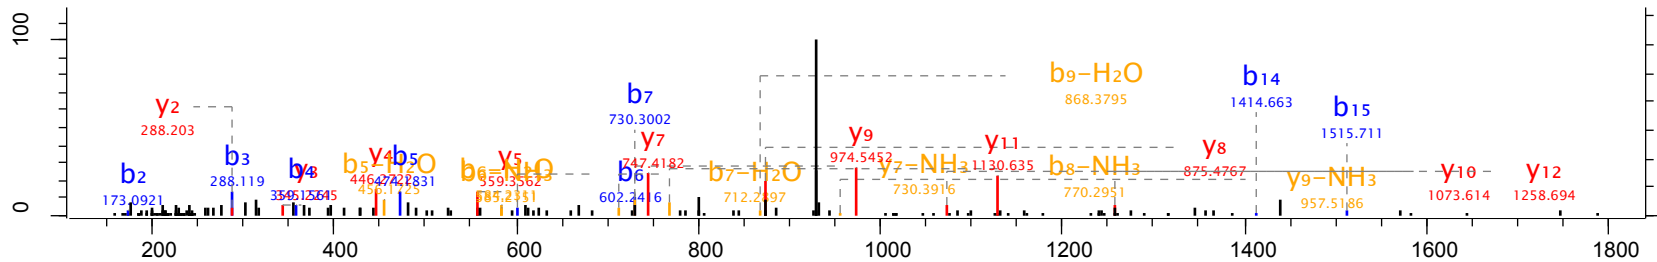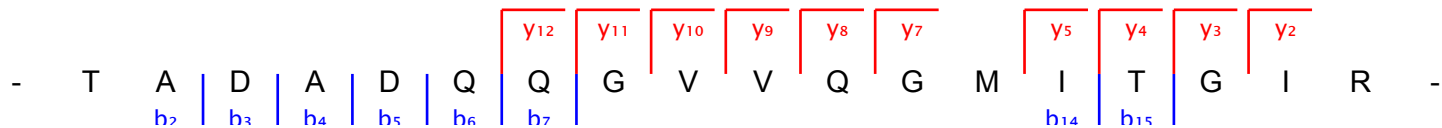

| Raw file                           | Scan  | Method   | Score  | m/z    | Gene names |
|------------------------------------|-------|----------|--------|--------|------------|
| 20141014_fract18_dyn_5ul_G2_01_597 | 29283 | TOF; CID | 204.53 | 917.11 | EIF4EBP1   |

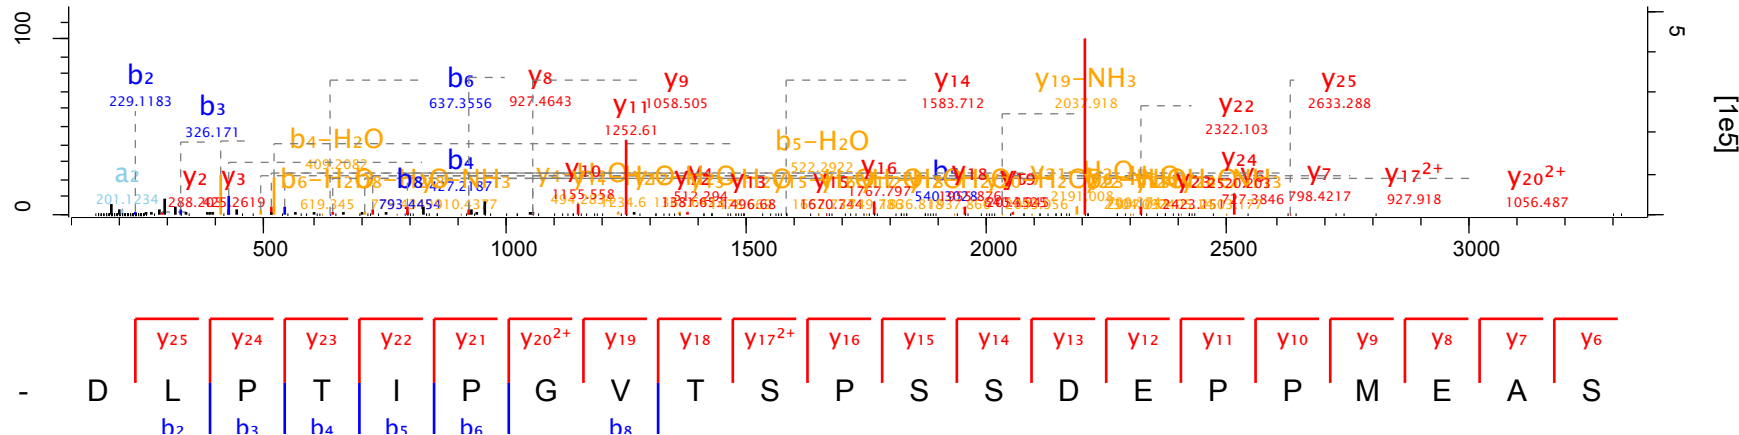

Raw file

20141014\_fract18\_dyn\_5ul\_G2\_01\_597

Scan

32329

Method

TOF; CID

Score

96.1

m/z

968

Gene names

EFHC1

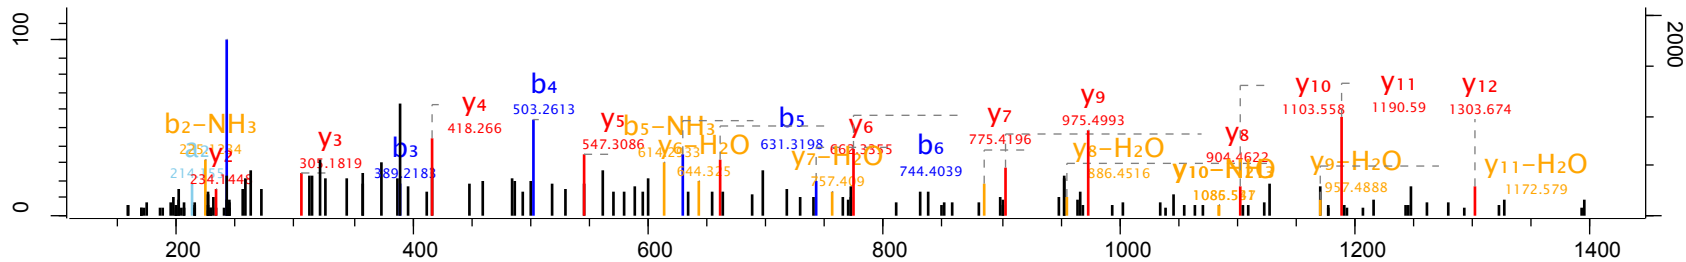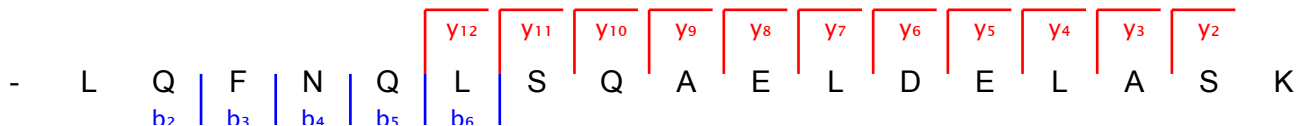



Raw file

20141014\_fract19\_dyn\_5ul\_G3\_01\_598

Scan

10366

Method

TOF; CID

Score

55.04

m/z

530.25

Gene names

MGAT5B

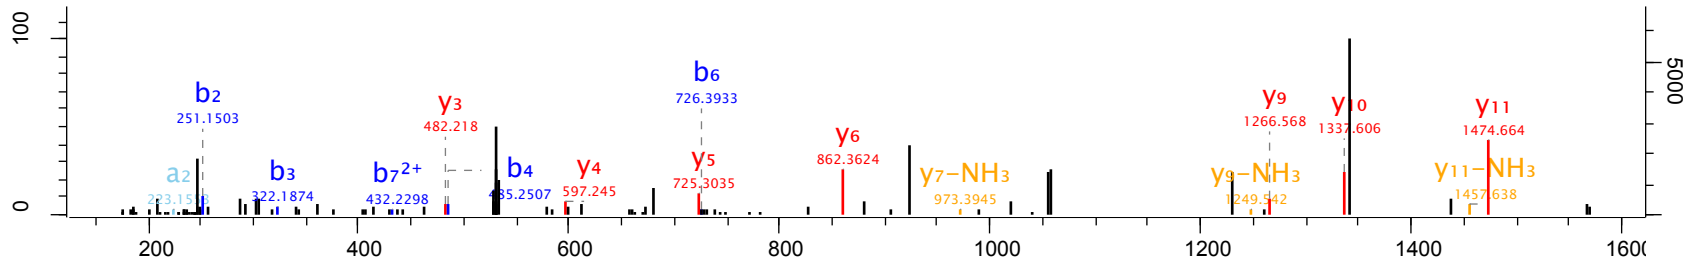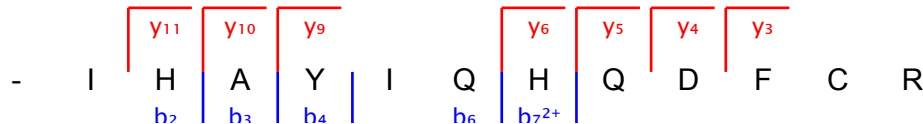

| Raw file                           | Scan  | Method   | Score | m/z    | Gene names |
|------------------------------------|-------|----------|-------|--------|------------|
| 20141014_fract19_dyn_5ul_G3_01_598 | 38338 | TOF; CID | 74.54 | 894.45 | CCDC70     |

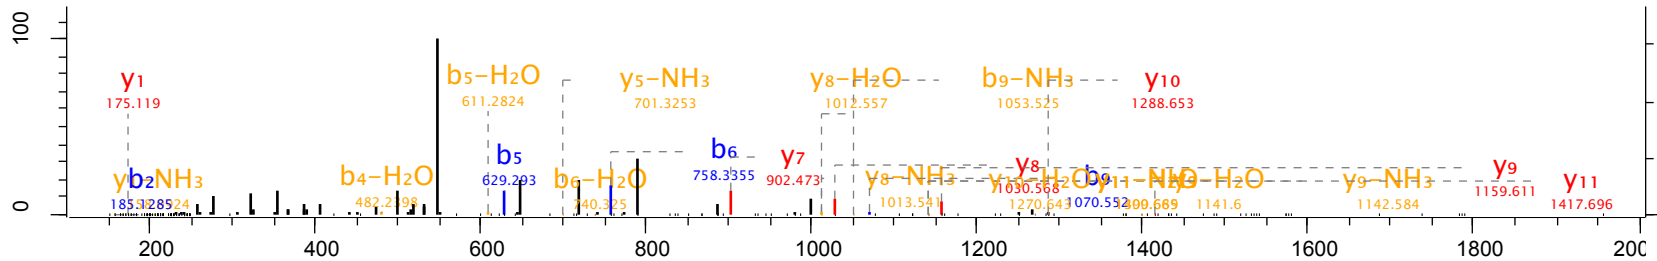

- A L W E E E K A L W V E E R -

          |          |          |          |          |          |          |          |

          b<sub>2</sub>          b<sub>5</sub>          b<sub>6</sub>          b<sub>9</sub>

          y<sub>11</sub>          y<sub>10</sub>          y<sub>9</sub>          y<sub>8</sub>          y<sub>7</sub>          y<sub>1</sub>

[1e5]

Raw file 20141014\_fract19\_dyn\_5ul\_G3\_01\_598 Scan 38518 Method TOF; CID Score 84.75 m/z 565.02 Gene names SMIM11

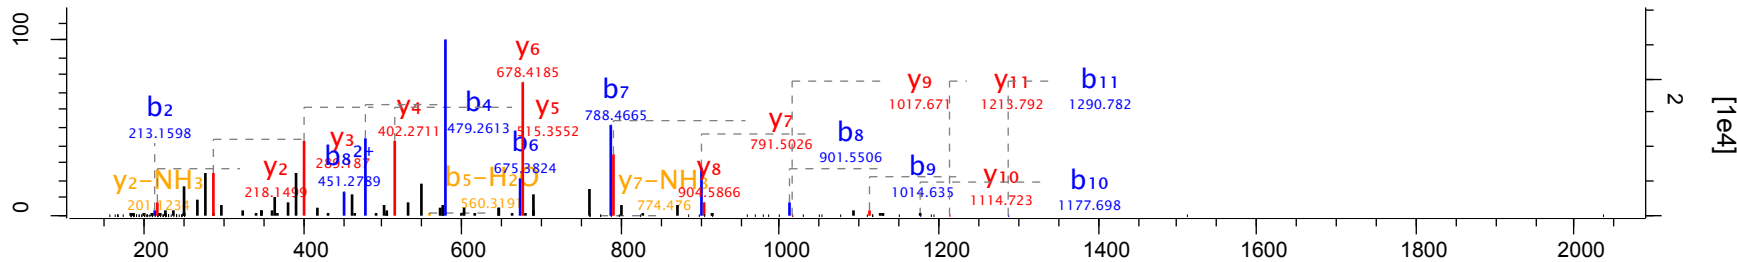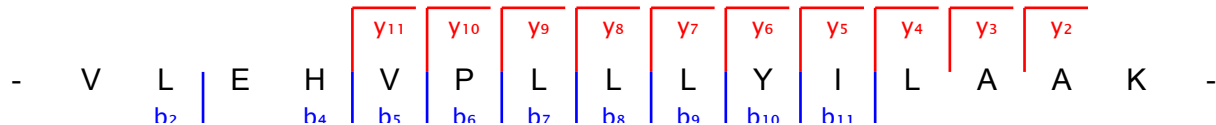

| Raw file                           | Scan  | Method   | Score | m/z    | Gene names |
|------------------------------------|-------|----------|-------|--------|------------|
| 20141014_fract21_dyn_5ul_G5_01_600 | 28402 | TOF; CID | 63.68 | 585.64 | TWSG1      |

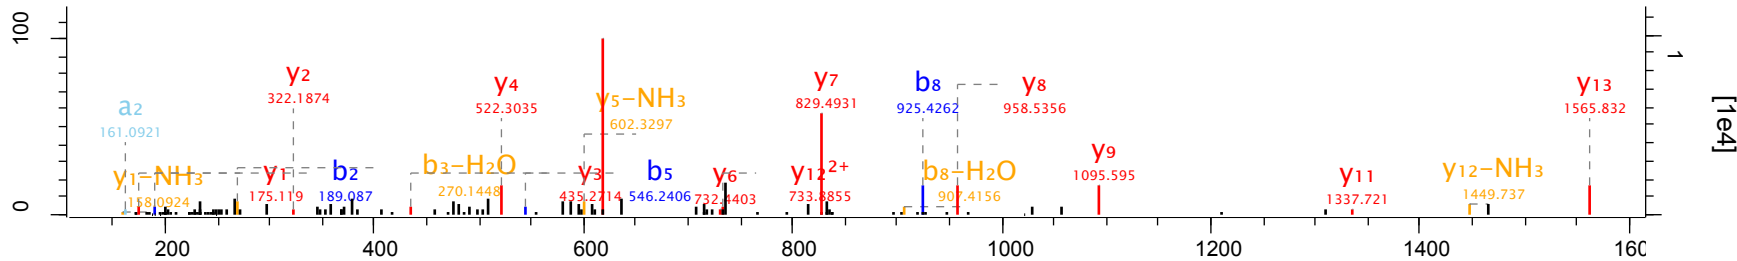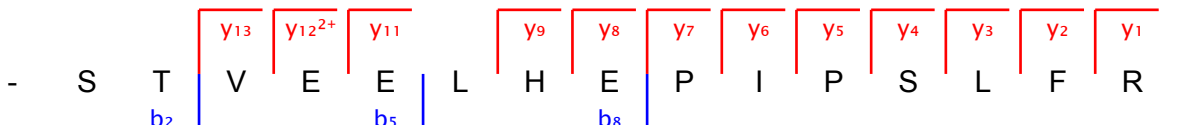

Raw file

Scan

Method

Score

m/z

Gene names

20141014\_fract22\_dyn\_5ul\_G6\_01\_601

22553

TOF; CID

105.9

734.65

ELOF1

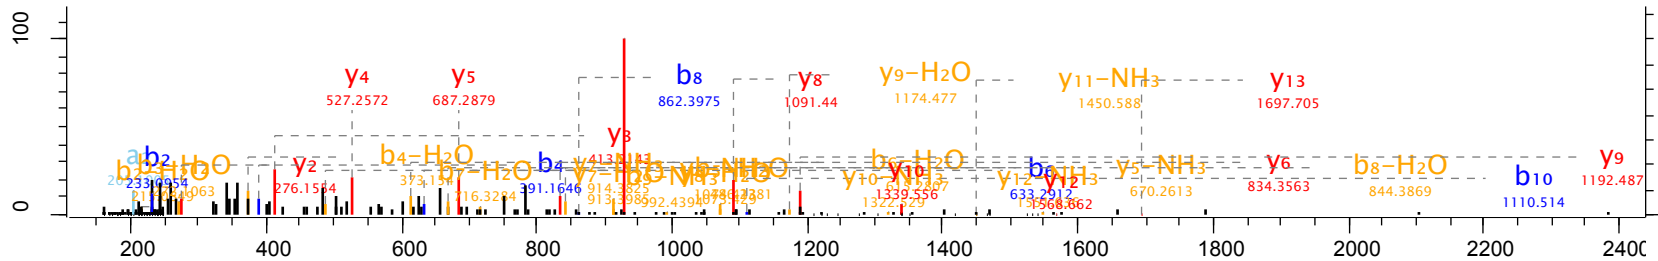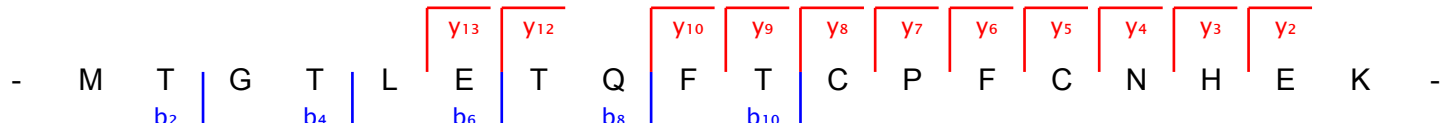

| Raw file                           | Scan  | Method   | Score | m/z    | Gene names |
|------------------------------------|-------|----------|-------|--------|------------|
| 20141014_fract23_dyn_5ul_G7_01_602 | 16291 | TOF; CID | 117.1 | 469.76 | APH1A      |

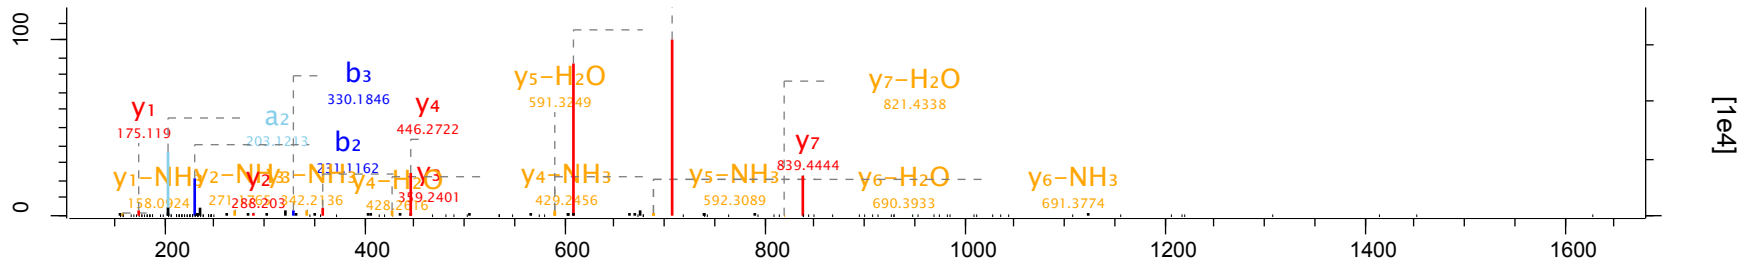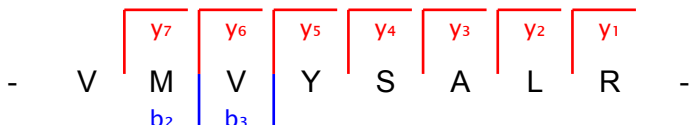

Raw file

Scan

Method

Score

m/z

Gene names

20141014\_fract23\_dyn\_5ul\_G7\_01\_602

17175

TOF; CID

75.5

632.35

TTBK2

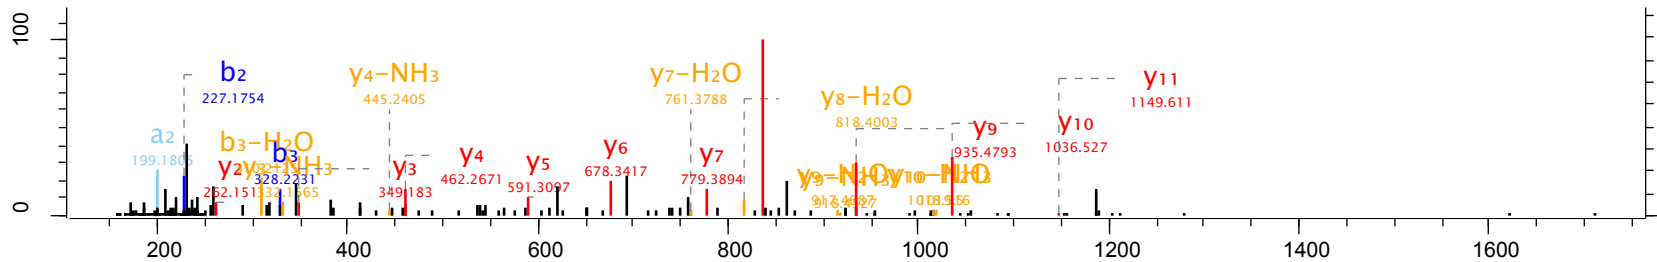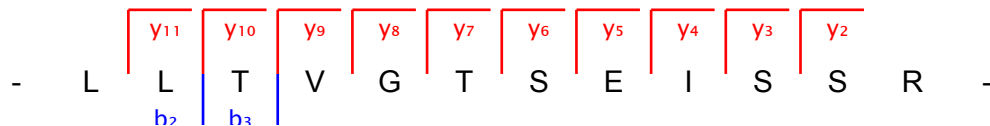

| Raw file                           | Scan  | Method   | Score | m/z    | Gene names |
|------------------------------------|-------|----------|-------|--------|------------|
| 20141014_fract23_dyn_5ul_G7_01_602 | 35313 | TOF; CID | 65.84 | 698.87 | PRKD2      |

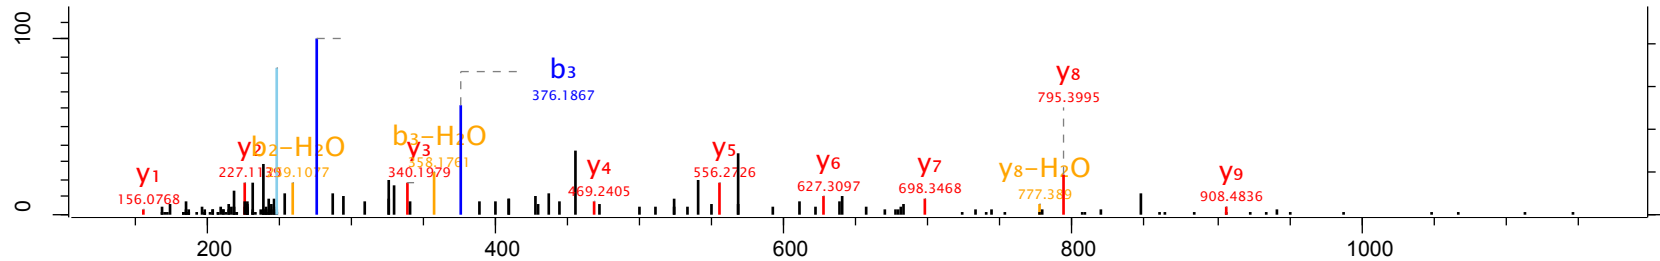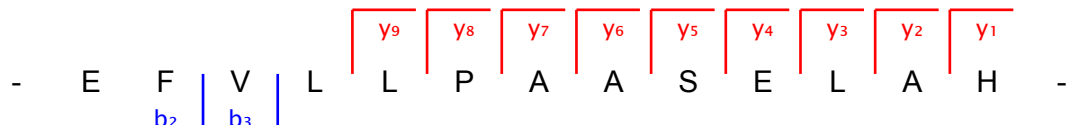



| Raw file                           | Scan  | Method   | Score | m/z     | Gene names |
|------------------------------------|-------|----------|-------|---------|------------|
| 20141014_fract23_dyn_5ul_G7_01_602 | 37784 | TOF; CID | 51.71 | 1199.88 | MYEOV2     |

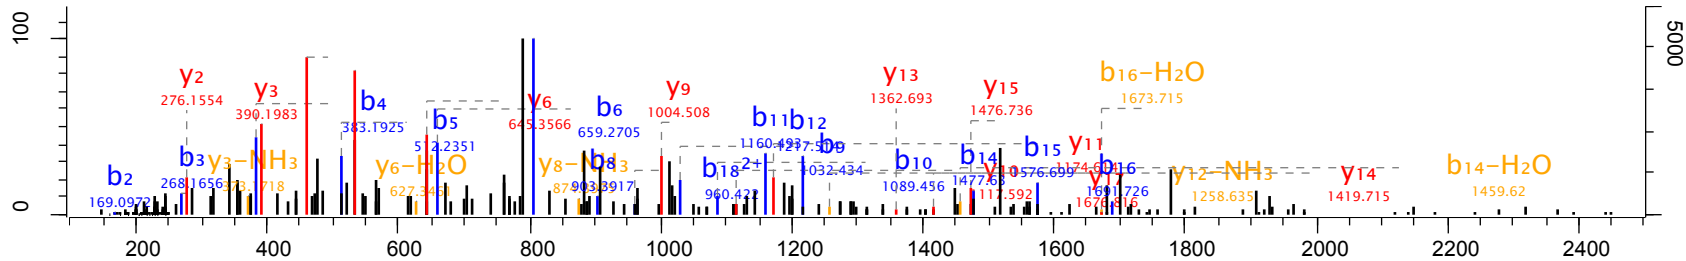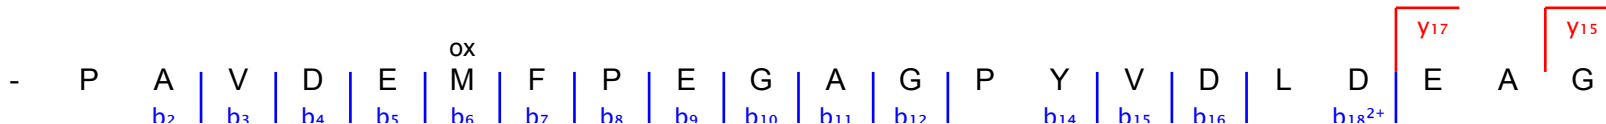

Raw file

20141014\_fract24\_dyn\_5ul\_G8\_01\_603

Scan

12552

Method

TOF; CID

Score

95.5

m/z

528.81

Gene names

TTC7B

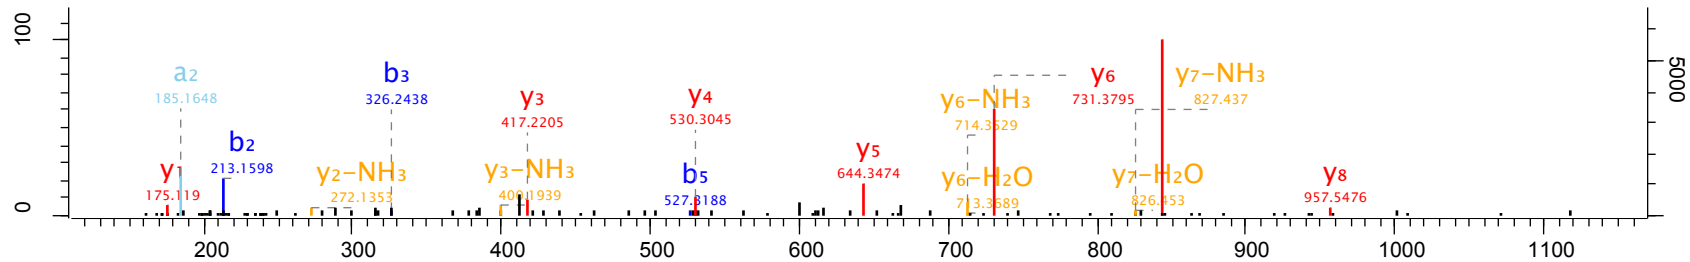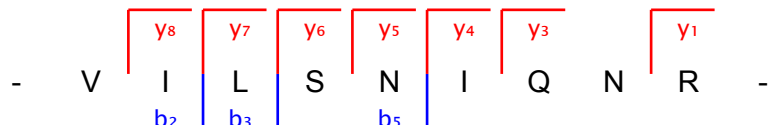

Supplement: supp_M114.047407_mcp.M114.047407-13.pdf [file supp_M114.047407_mcp.M114.047407-13.pdf]
