# Supplementary material for: The Impact II, a Very High-Resolution Quadrupole Time-of-Flight Instrument (QTOF) for Deep Shotgun Proteomics
Source: PubMed Central journal article supplement (PMC4587313; doi:10.1074/mcp.m114.047407), 2015-05-19
Supplement: supp_M114.047407_mcp.M114.047407-5.pdf [file supp_M114.047407_mcp.M114.047407-5.pdf]

| Raw file                         | Scan | Method   | Score | m/z    | Gene names |
|----------------------------------|------|----------|-------|--------|------------|
| 20150226_Hela_Top_opt_A3_01_1591 | 5243 | TOF; CID | 53.03 | 670.33 | SYF2       |

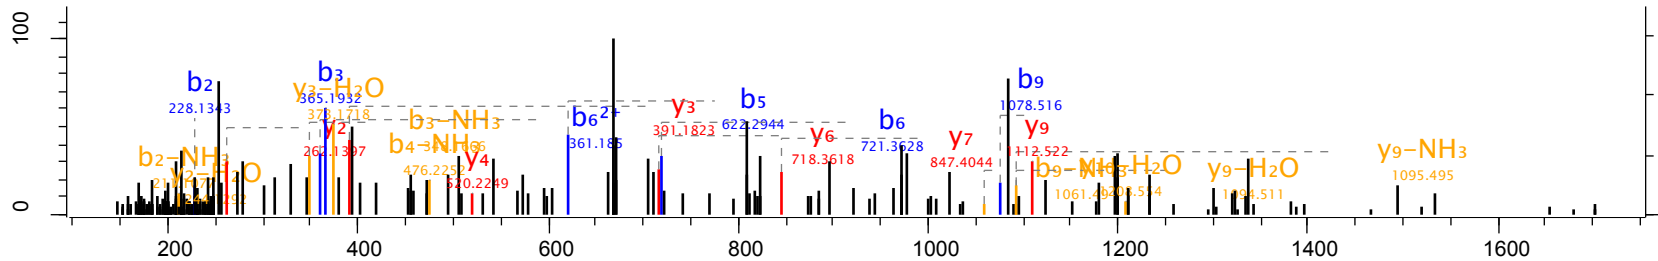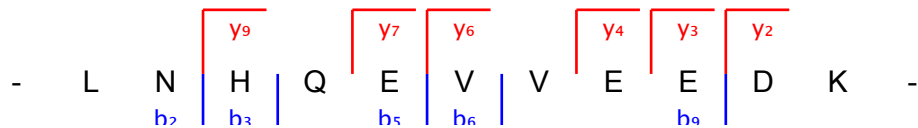

Raw file

Scan

Method

Score

m/z

Gene names

20150226\_Hela\_Top\_opt\_A3\_01\_1591

5388

TOF; CID

58.59

664.3

PPP1R12C

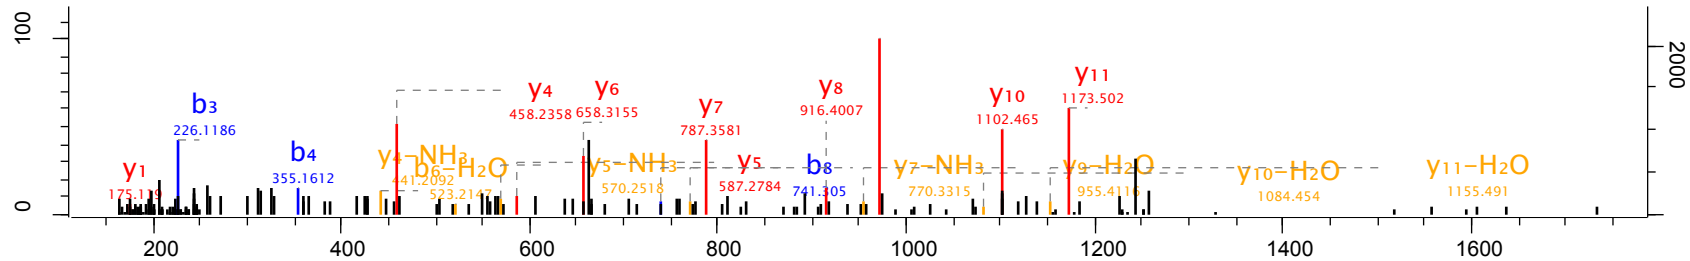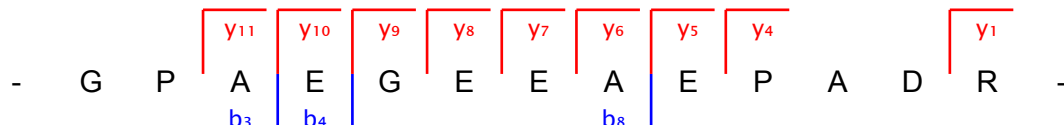

| Raw file                         | Scan | Method   | Score | m/z    | Gene names |
|----------------------------------|------|----------|-------|--------|------------|
| 20150226_Hela_Top_opt_A3_01_1591 | 6262 | TOF; CID | 45.08 | 326.17 | FAM162B    |

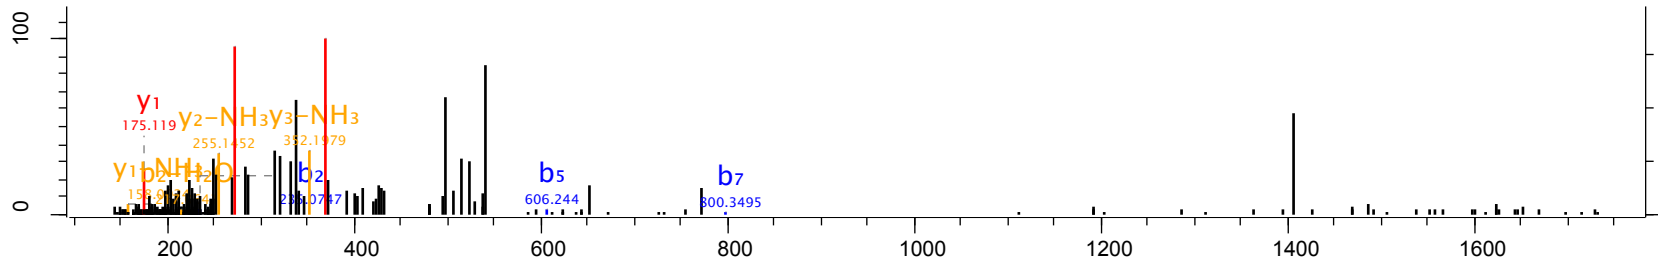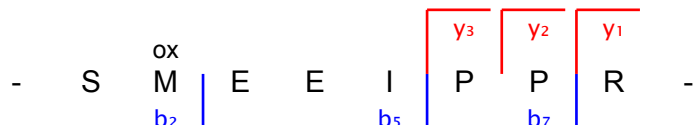

| Raw file                         | Scan | Method   | Score | m/z    | Gene names |
|----------------------------------|------|----------|-------|--------|------------|
| 20150226_Hela_Top_opt_A3_01_1591 | 7469 | TOF; CID | 51.61 | 627.31 | CUX1       |

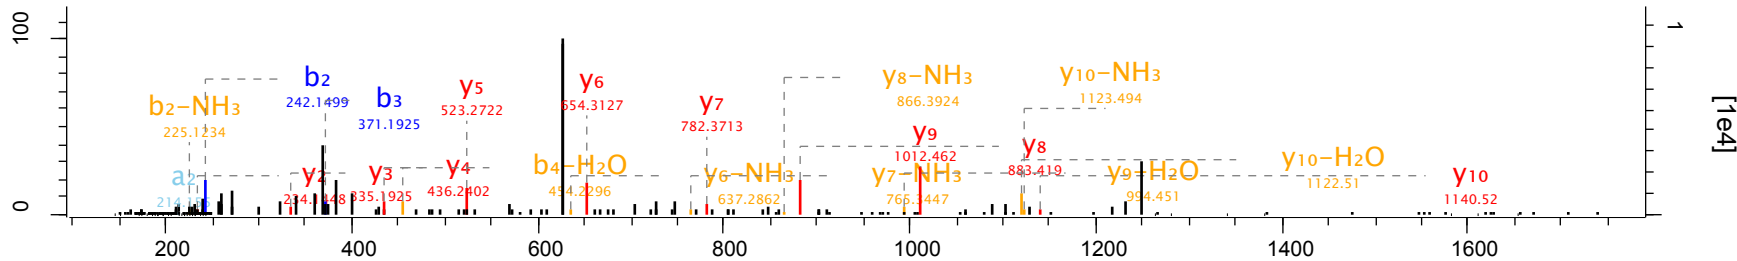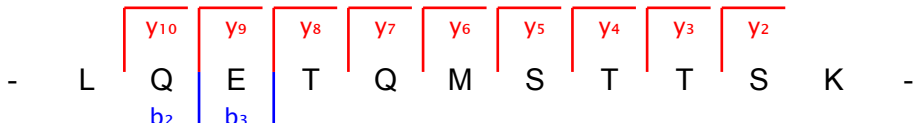

| Raw file                         | Scan | Method   | Score | m/z    | Gene names |
|----------------------------------|------|----------|-------|--------|------------|
| 20150226_Hela_Top_opt_A3_01_1591 | 7709 | TOF; CID | 70.78 | 608.96 | SP3        |

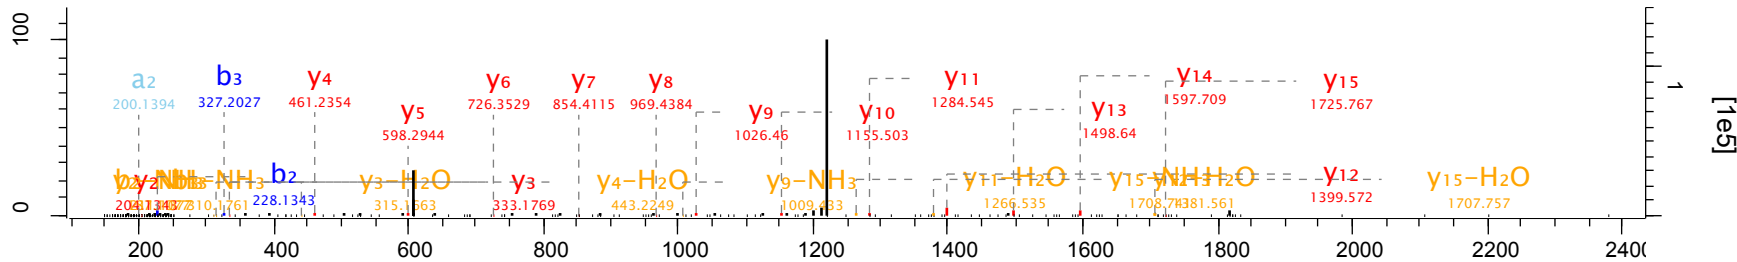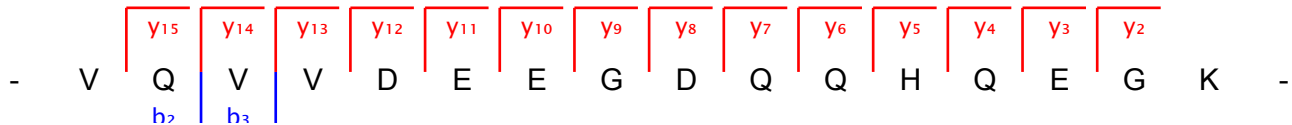

| Raw file                         | Scan | Method   | Score | m/z    | Gene names |
|----------------------------------|------|----------|-------|--------|------------|
| 20150226_Hela_Top_opt_A3_01_1591 | 7884 | TOF; CID | 38.75 | 804.35 | ATG13      |

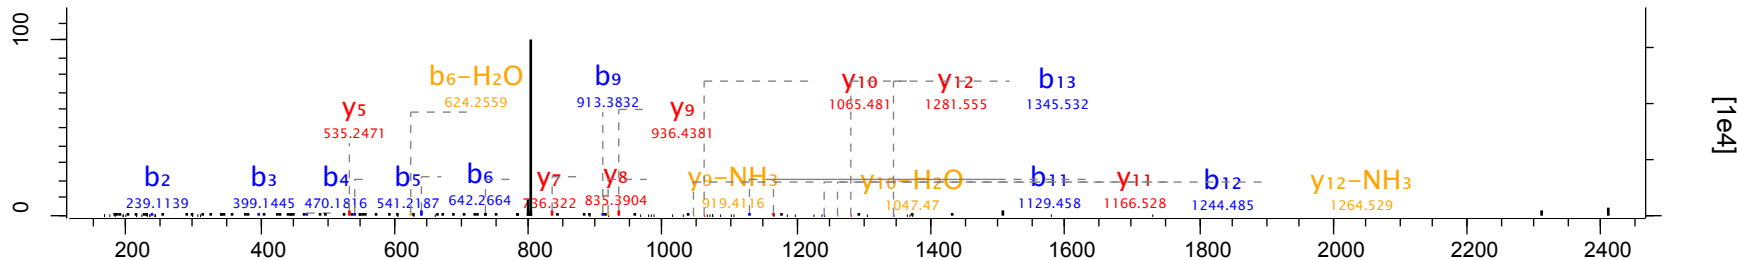

- T H C A A T P S S S E D T E T V S N S S E

b<sub>2</sub> | b<sub>3</sub> | b<sub>4</sub> | b<sub>5</sub> | b<sub>6</sub> | b<sub>9</sub> | b<sub>11</sub> | b<sub>12</sub> | b<sub>13</sub>

y<sub>12</sub> | y<sub>11</sub> | y<sub>10</sub> | y<sub>9</sub> | y<sub>8</sub> | y<sub>7</sub> | y<sub>5</sub>

| Raw file                         | Scan | Method   | Score | m/z    | Gene names |
|----------------------------------|------|----------|-------|--------|------------|
| 20150226_Hela_Top_opt_A3_01_1591 | 8733 | TOF; CID | 55.75 | 839.88 | C5orf22    |

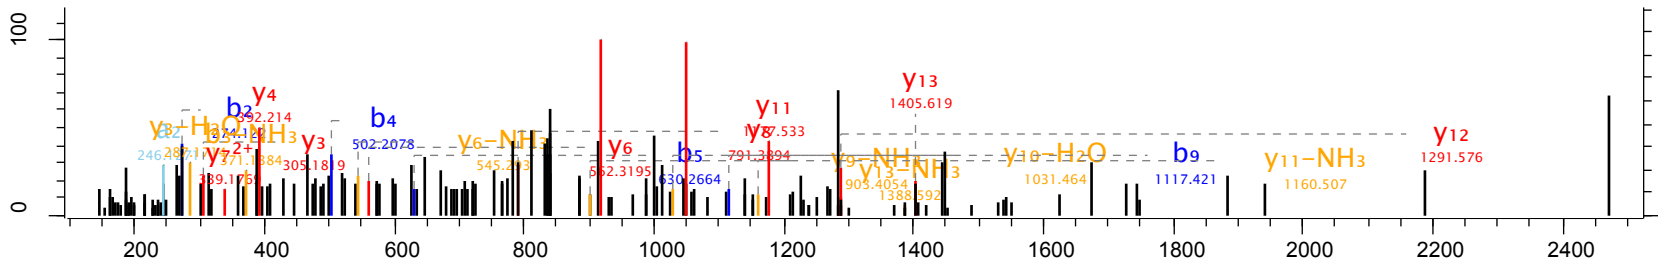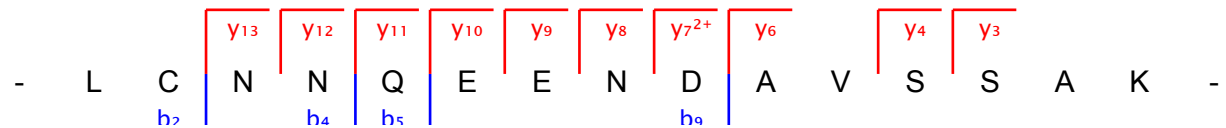

| Raw file                         | Scan  | Method   | Score | m/z    | Gene names |
|----------------------------------|-------|----------|-------|--------|------------|
| 20150226_Hela_Top_opt_A3_01_1591 | 11054 | TOF; CID | 94.85 | 517.76 | CTNNAL1    |

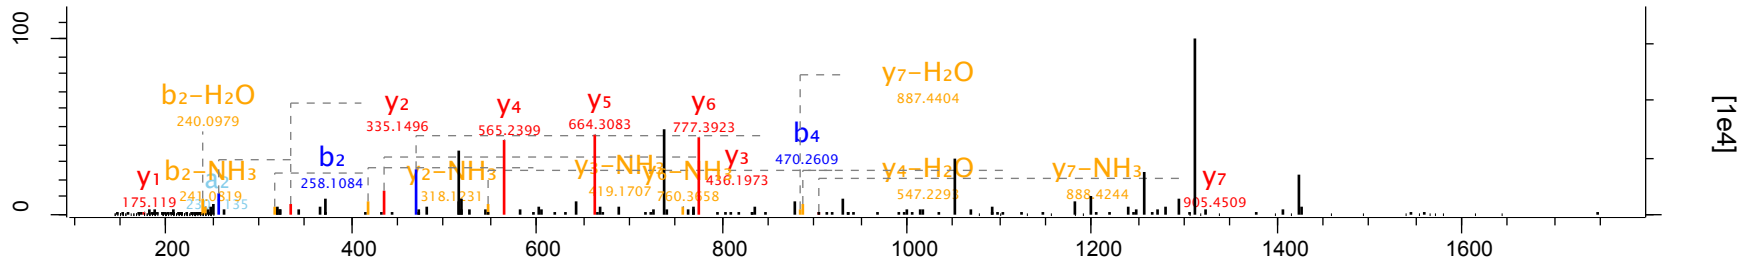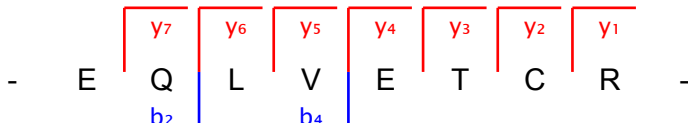



| Raw file                         | Scan  | Method   | Score | m/z    | Gene names |
|----------------------------------|-------|----------|-------|--------|------------|
| 20150226_Hela_Top_opt_A3_01_1591 | 11129 | TOF; CID | 63.97 | 693.86 | RRAS2      |

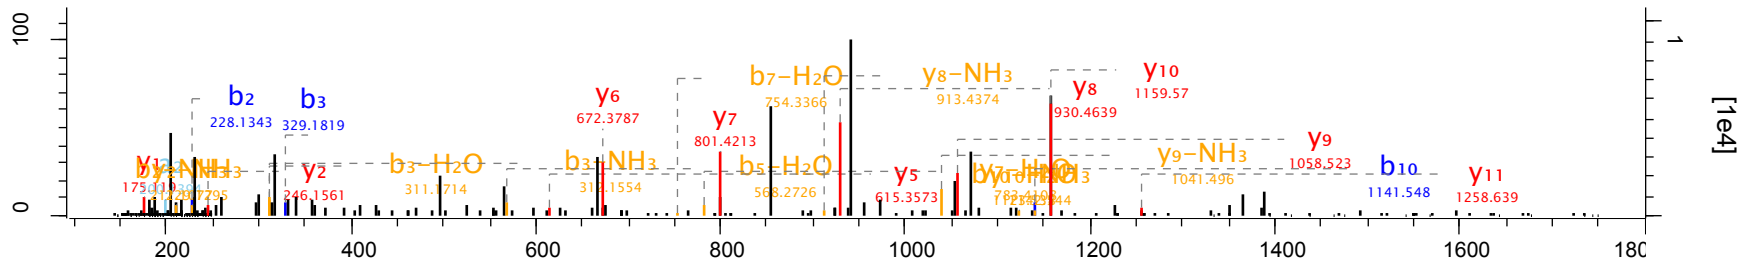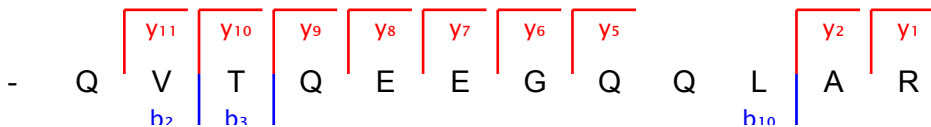

| Raw file                         | Scan  | Method   | Score | m/z    | Gene names |
|----------------------------------|-------|----------|-------|--------|------------|
| 20150226_Hela_Top_opt_A3_01_1591 | 12892 | TOF; CID | 78.51 | 779.39 | RNF170     |

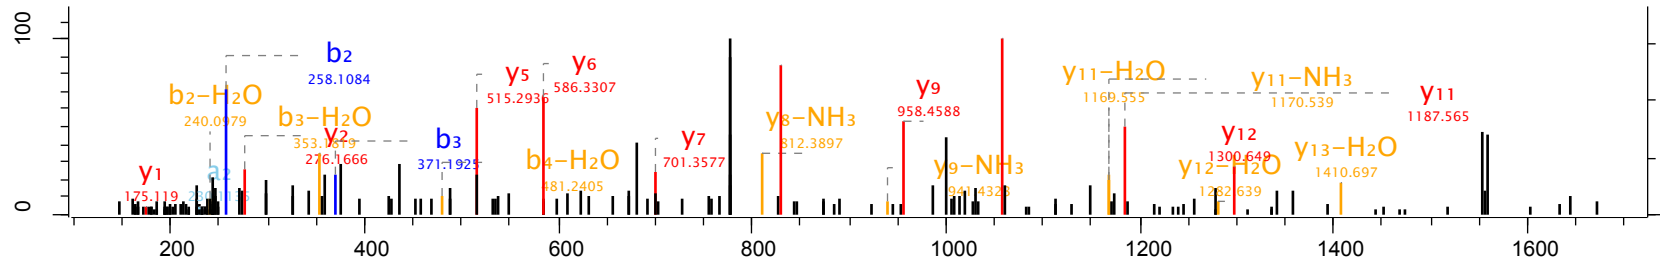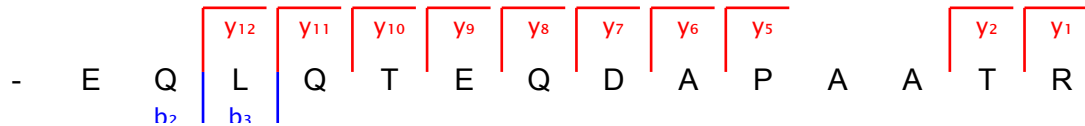

Raw file

20150226\_Hela\_Top\_opt\_A3\_01\_1591

Scan

13227

Method

TOF; CID

Score

125.74

m/z

513.79

Gene names

SMIM12

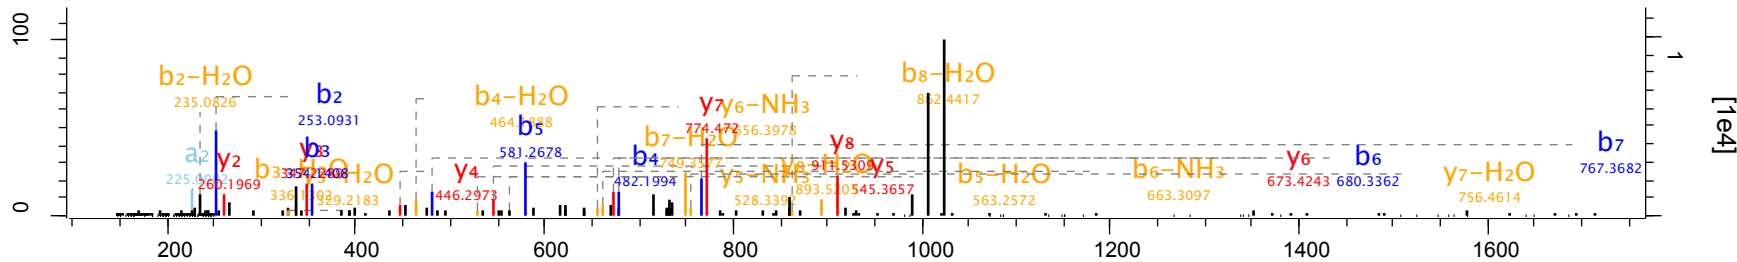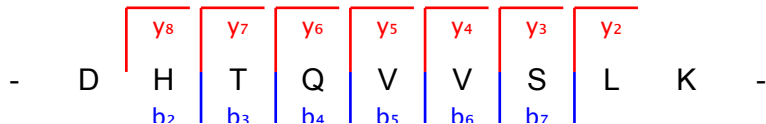

Raw file

20150226\_Hela\_Top\_opt\_A3\_01\_1591

Scan

15191

Method

TOF; CID

Score

51.64

m/z

650.83

Gene names

CENPC;CENPC1

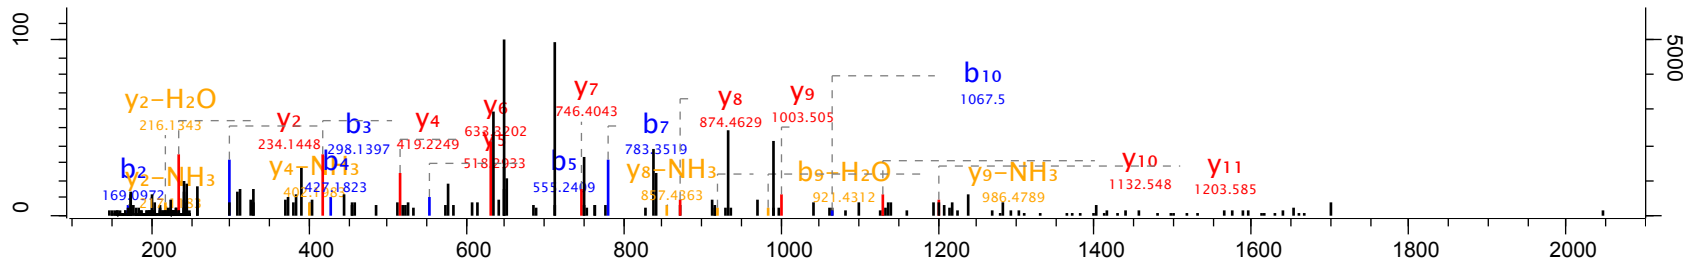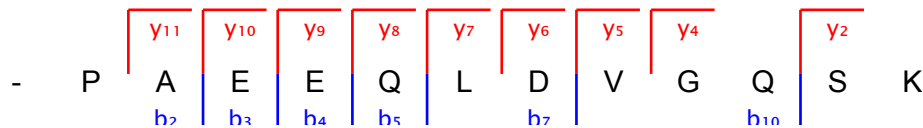

Raw file

20150226\_Hela\_Top\_opt\_A3\_01\_1591

Scan

15820

Method

TOF; CID

Score

116.24

m/z

465.25

Gene names

ALX1

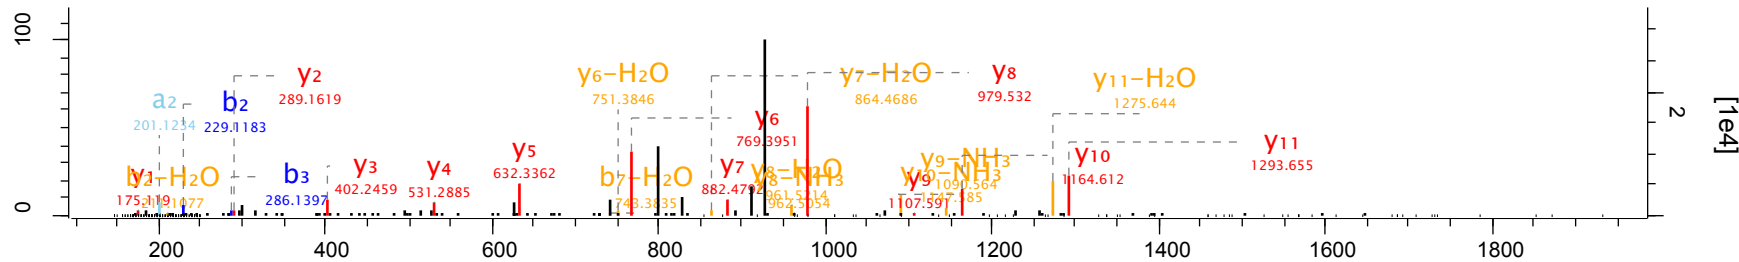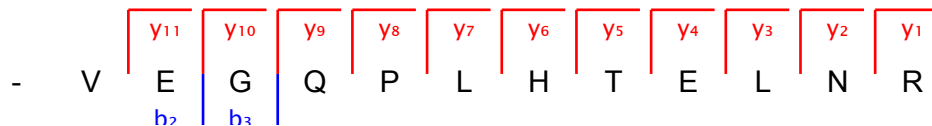

Raw file

20150226\_Hela\_Top\_opt\_A3\_01\_1591

Scan

15982

Method

TOF; CID

Score

102.66

m/z

1053.01

Gene names

GSK3B

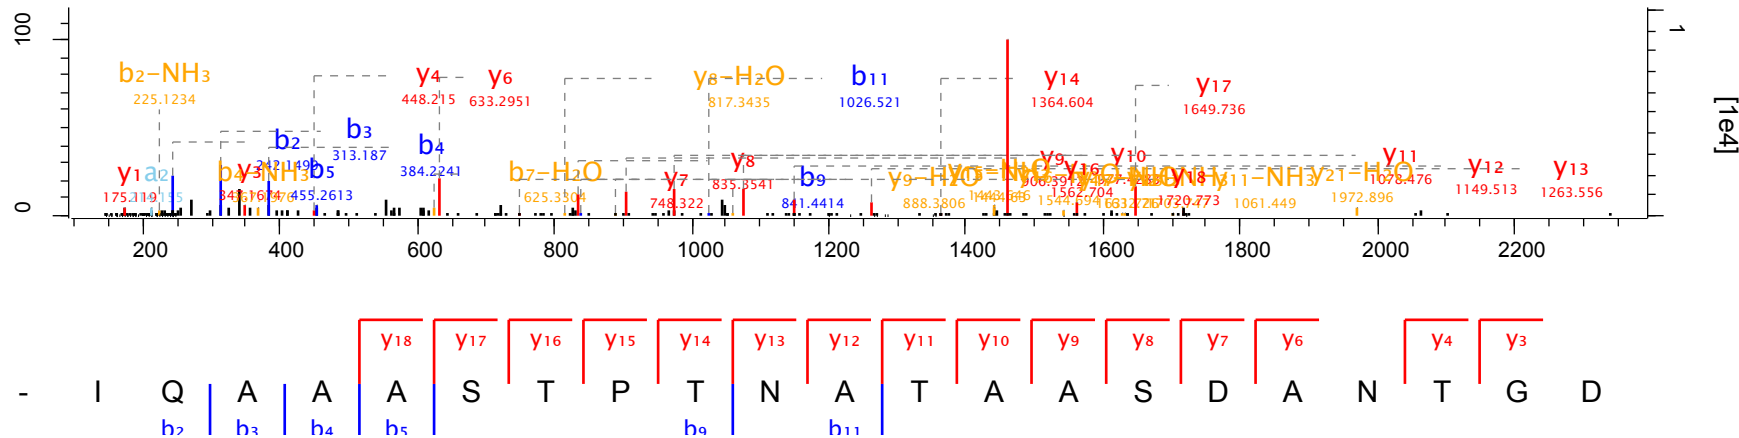

| Raw file                         | Scan  | Method   | Score  | m/z    | Gene names |
|----------------------------------|-------|----------|--------|--------|------------|
| 20150226_Hela_Top_opt_A3_01_1591 | 16147 | TOF; CID | 113.69 | 659.35 | BANP       |

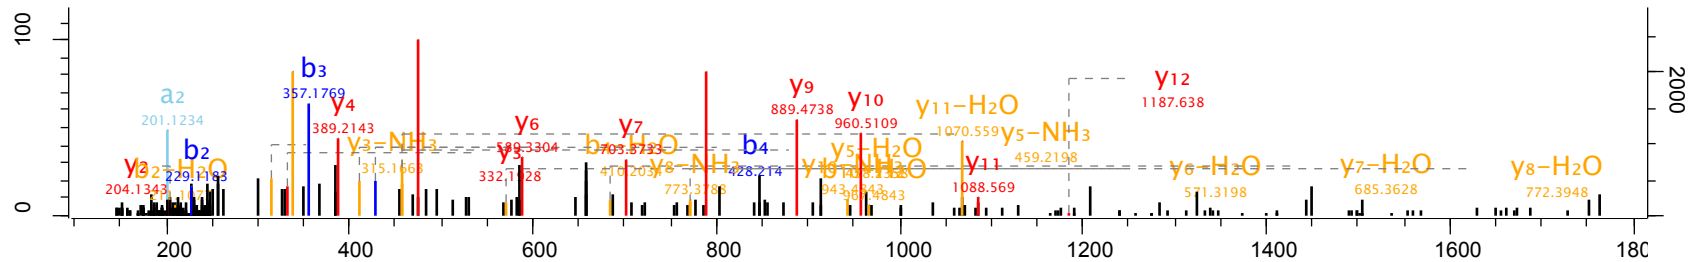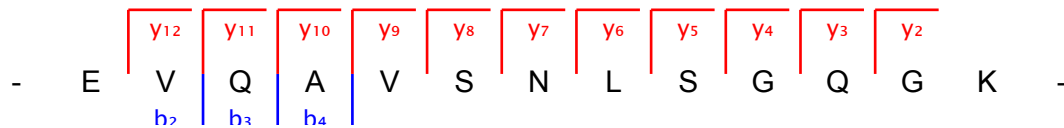

| Raw file                         | Scan  | Method   | Score | m/z    | Gene names |
|----------------------------------|-------|----------|-------|--------|------------|
| 20150226_Hela_Top_opt_A3_01_1591 | 17924 | TOF; CID | 40.78 | 651.33 | LAGE3      |

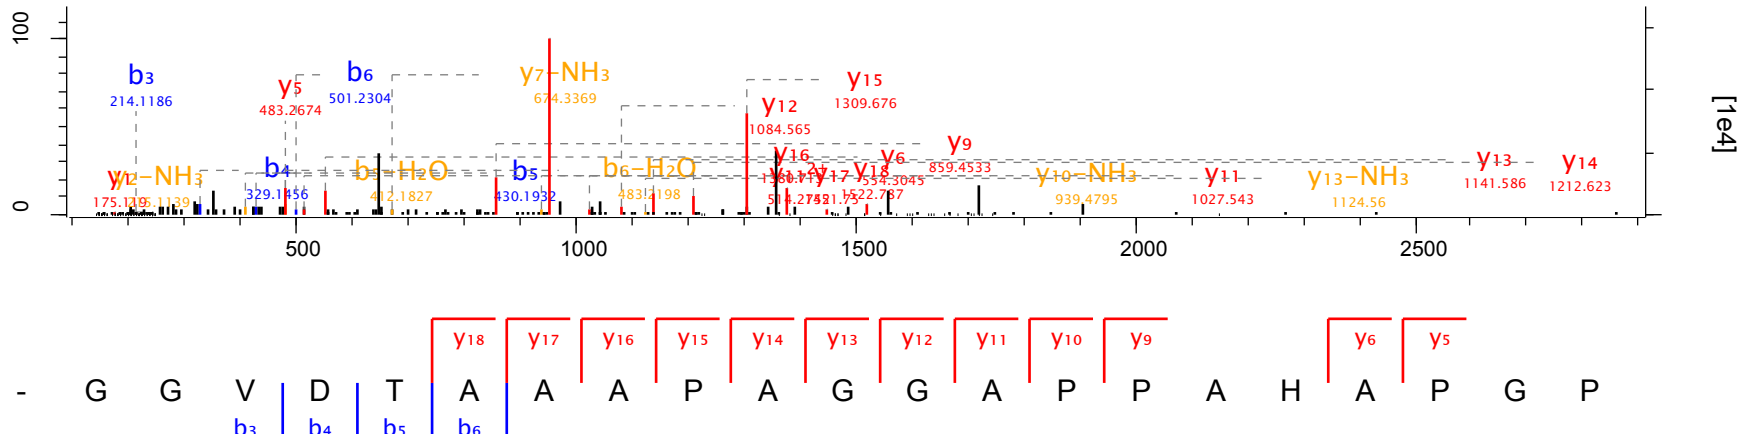



| Raw file                         | Scan  | Method   | Score | m/z    | Gene names |
|----------------------------------|-------|----------|-------|--------|------------|
| 20150226_Hela_Top_opt_A3_01_1591 | 18258 | TOF; CID | 51.73 | 486.26 | TRADD      |

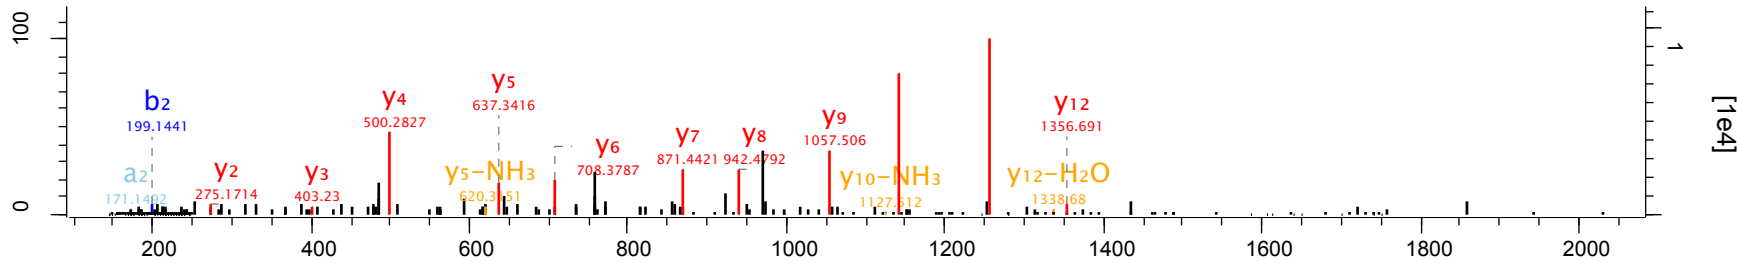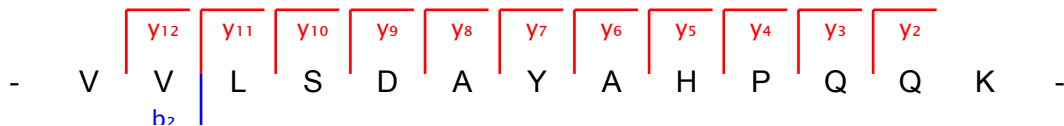

Raw file Scan Method Score m/z Gene names  
 20150226\_Hela\_Top\_opt\_A3\_01\_1591 18920 TOF; CID 104.88 812.89 RNF115

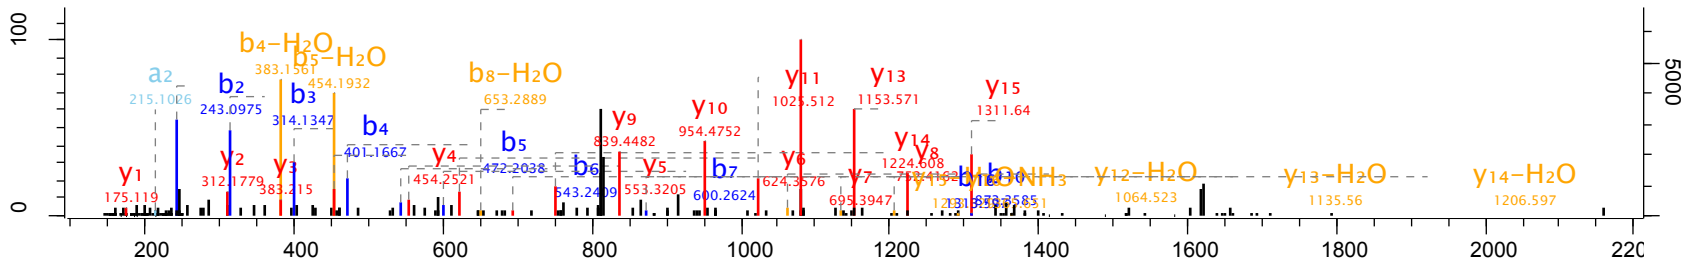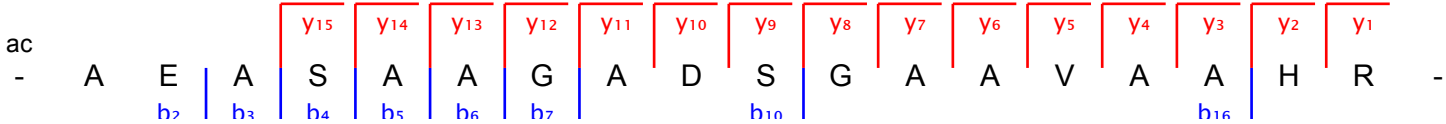

| Raw file                         | Scan  | Method   | Score | m/z    | Gene names |
|----------------------------------|-------|----------|-------|--------|------------|
| 20150226_Hela_Top_opt_A3_01_1591 | 19502 | TOF; CID | 78.52 | 493.76 | UTS2       |

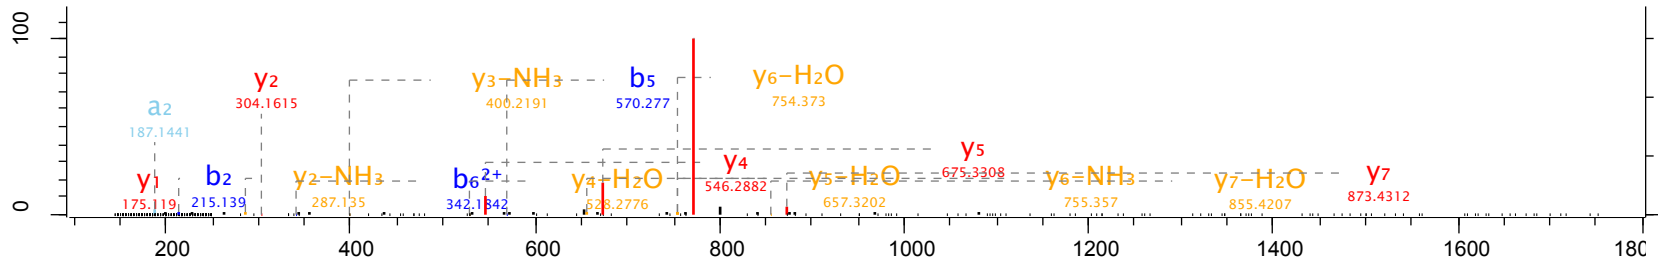

[1e5]

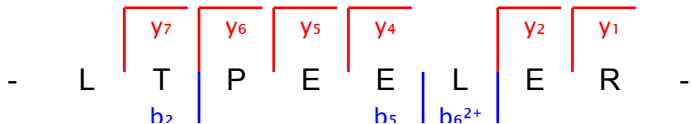

| Raw file                         | Scan  | Method   | Score | m/z    | Gene names |
|----------------------------------|-------|----------|-------|--------|------------|
| 20150226_Hela_Top_opt_A3_01_1591 | 20086 | TOF; CID | 62.46 | 347.23 | C10orf115  |

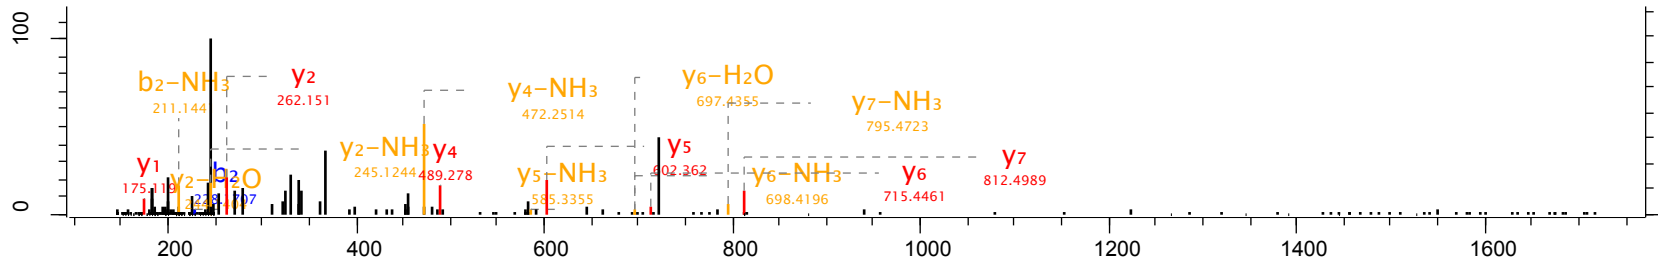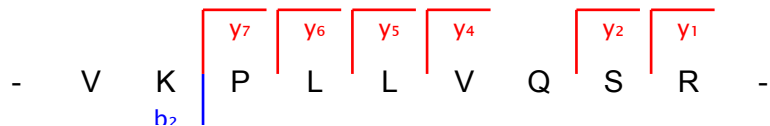

| Raw file                         | Scan  | Method   | Score | m/z    | Gene names |
|----------------------------------|-------|----------|-------|--------|------------|
| 20150226_Hela_Top_opt_A3_01_1591 | 20666 | TOF; CID | 71.38 | 523.78 | JADE2      |

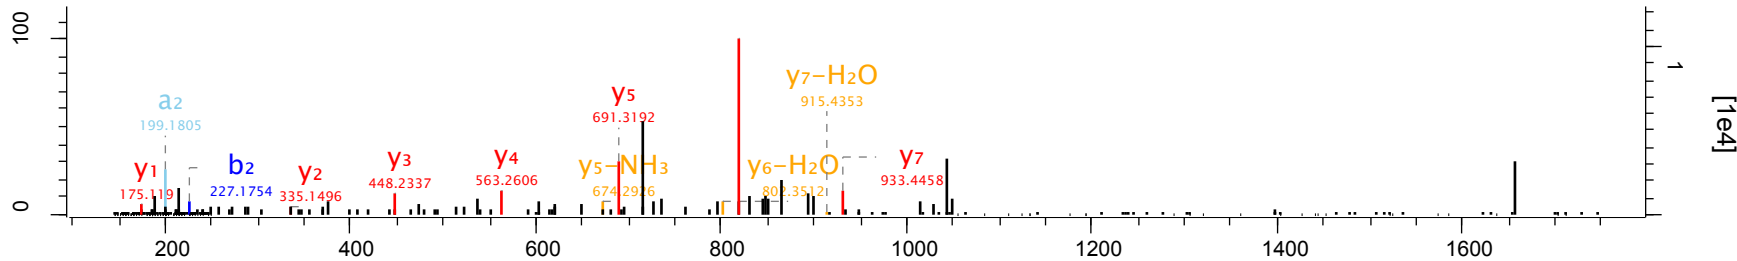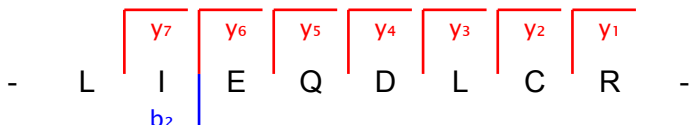

| Raw file                         | Scan  | Method   | Score | m/z    | Gene names |
|----------------------------------|-------|----------|-------|--------|------------|
| 20150226_Hela_Top_opt_A3_01_1591 | 21244 | TOF; CID | 62.66 | 851.38 | CLEC2B     |

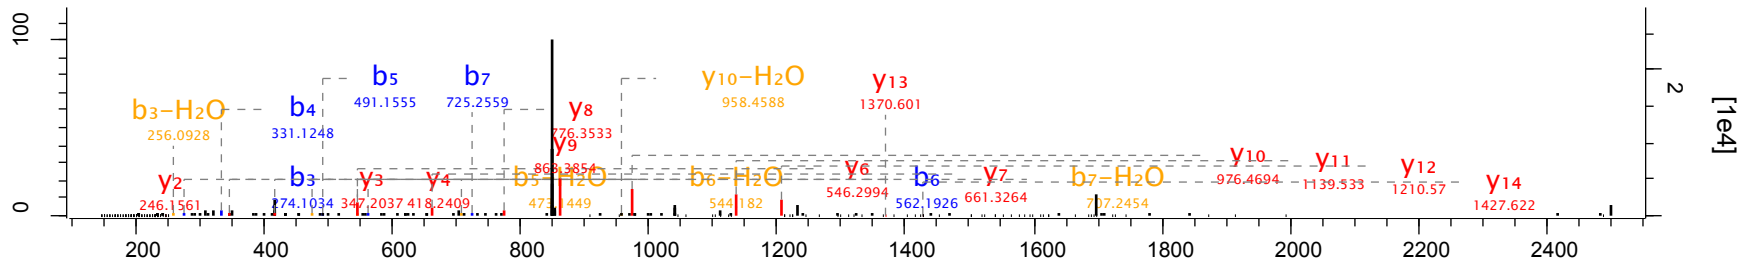

- G S E G C A Y L S D D G A A T A R -  
 b<sub>3</sub> b<sub>4</sub> b<sub>5</sub> b<sub>6</sub> b<sub>7</sub> y<sub>14</sub> y<sub>13</sub> y<sub>12</sub> y<sub>11</sub> y<sub>10</sub> y<sub>9</sub> y<sub>8</sub> y<sub>7</sub> y<sub>6</sub> y<sub>4</sub> y<sub>3</sub> y<sub>2</sub>

| Raw file                         | Scan  | Method   | Score | m/z    | Gene names |
|----------------------------------|-------|----------|-------|--------|------------|
| 20150226_Hela_Top_opt_A3_01_1591 | 21618 | TOF; CID | 67.33 | 394.55 | MICA       |

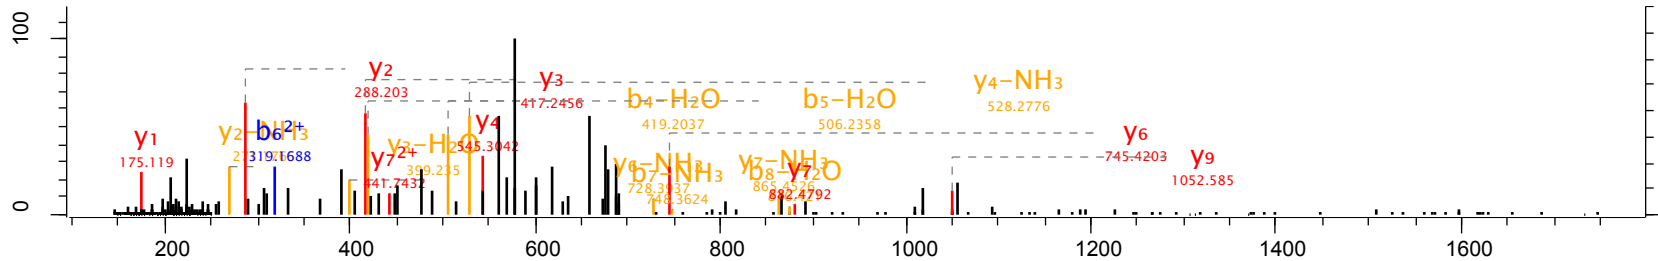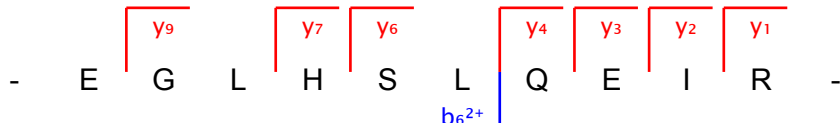

| Raw file                         | Scan  | Method   | Score  | m/z    | Gene names |
|----------------------------------|-------|----------|--------|--------|------------|
| 20150226_Hela_Top_opt_A3_01_1591 | 22114 | TOF; CID | 110.88 | 497.26 | AKR1D1     |

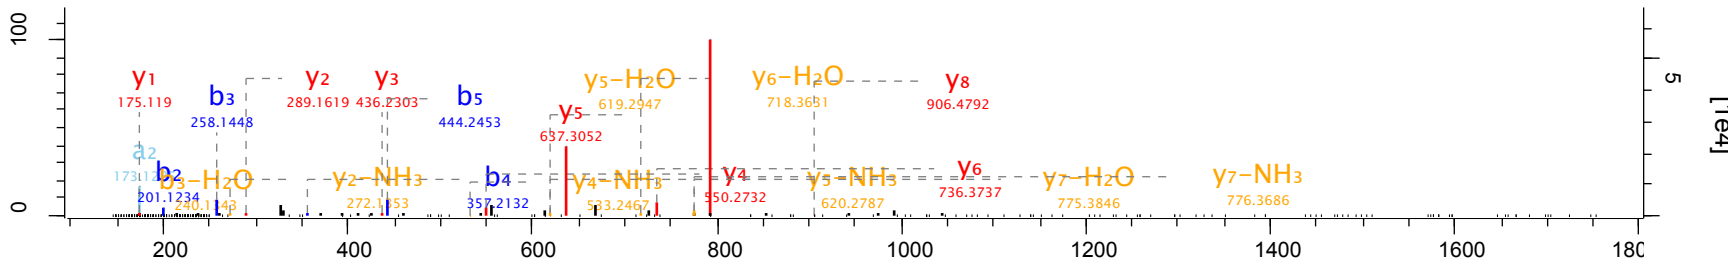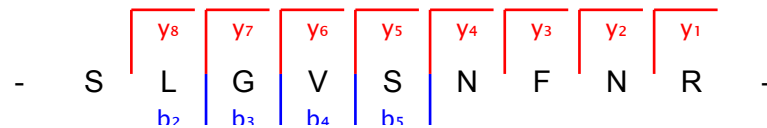



Raw file

20150226\_Hela\_Top\_opt\_A3\_01\_1591

Scan

22649

Method

TOF; CID

Score

77.87

m/z

711.31

Gene names

APOOL

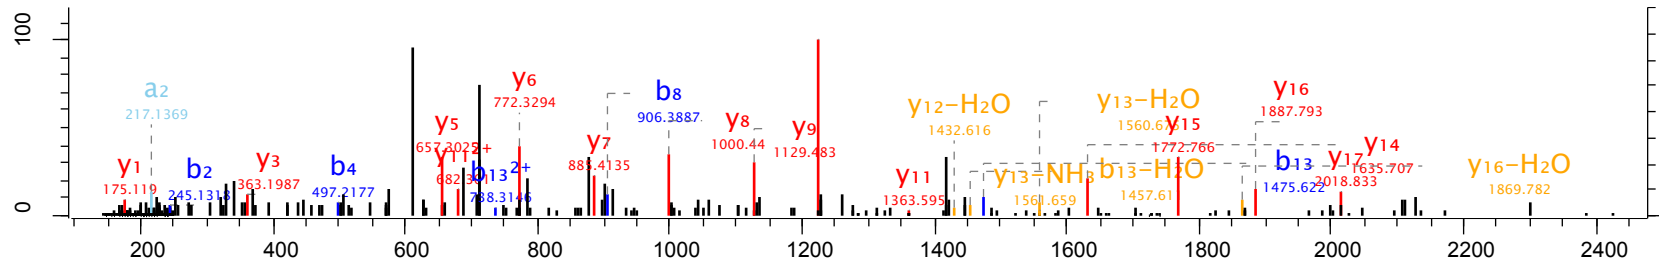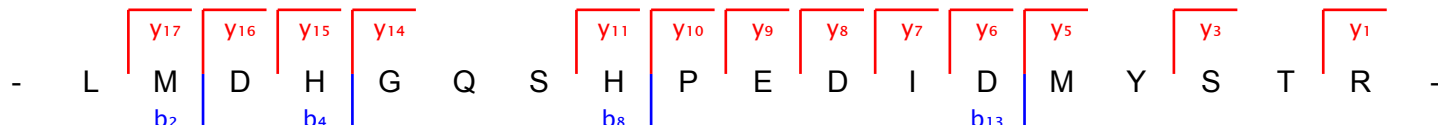

| Raw file                         | Scan  | Method   | Score | m/z    | Gene names |
|----------------------------------|-------|----------|-------|--------|------------|
| 20150226_Hela_Top_opt_A3_01_1591 | 23162 | TOF; CID | 78.18 | 392.76 | TSPAN10    |

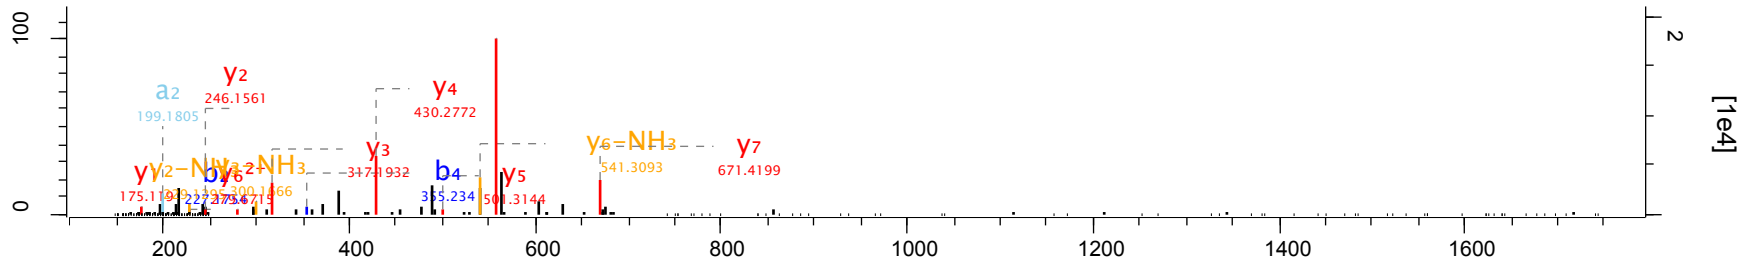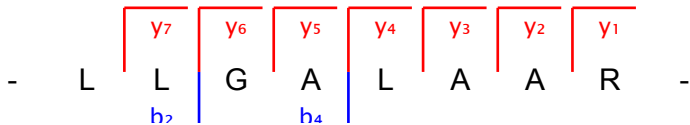

| Raw file                         | Scan  | Method   | Score | m/z    | Gene names |
|----------------------------------|-------|----------|-------|--------|------------|
| 20150226_Hela_Top_opt_A3_01_1591 | 23312 | TOF; CID | 47.15 | 961.94 | SLCO4A1    |

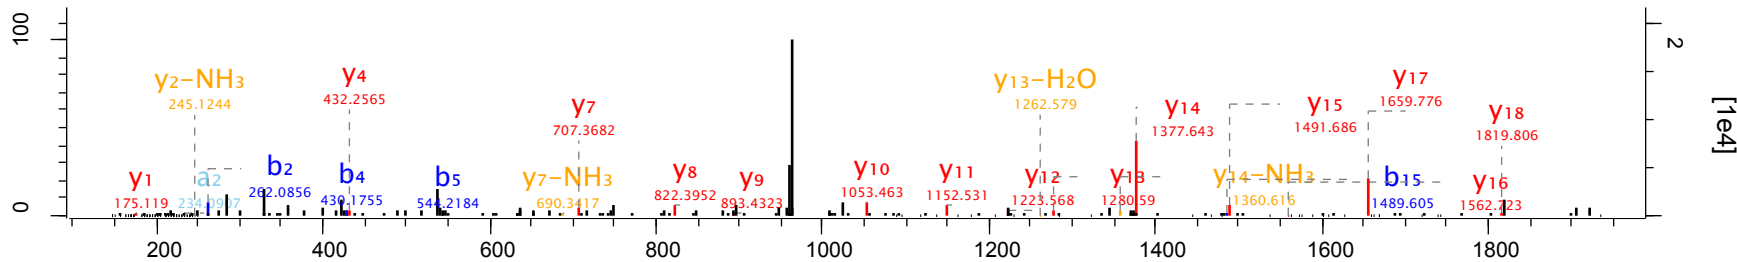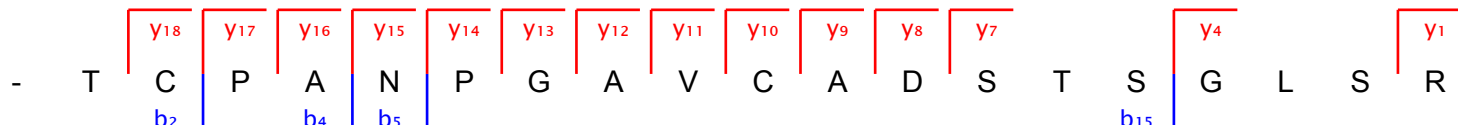

| Raw file                         | Scan  | Method   | Score | m/z    | Gene names |
|----------------------------------|-------|----------|-------|--------|------------|
| 20150226_Hela_Top_opt_A3_01_1591 | 23528 | TOF; CID | 64.64 | 611.31 | CCDC127    |

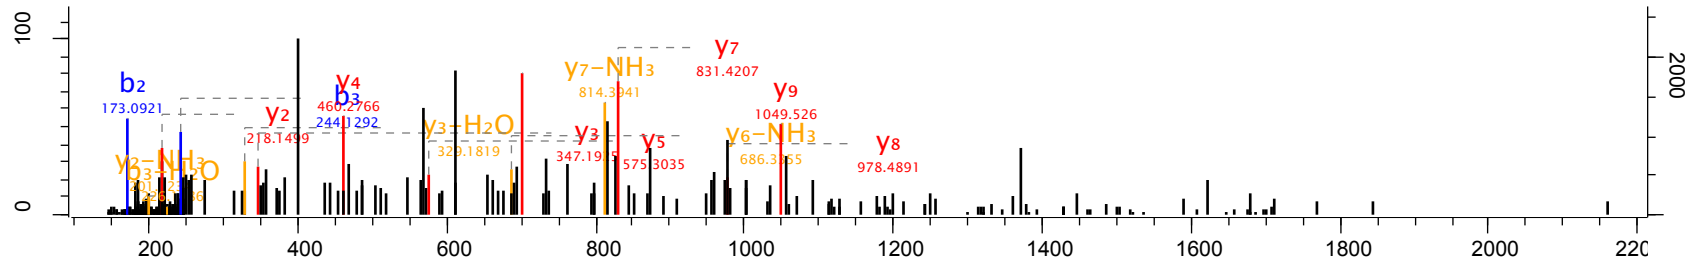

- T A A F Q Q D L E A K -

**b2**          **b3**

**y9**          **y8**          **y7**          **y6**          **y5**          **y4**          **y3**          **y2**

Raw file Scan Method Score m/z Gene names  
 20150226\_Hela\_Top\_opt\_A3\_01\_1591 23634 TOF; CID 71.9 1041 PTDSS2

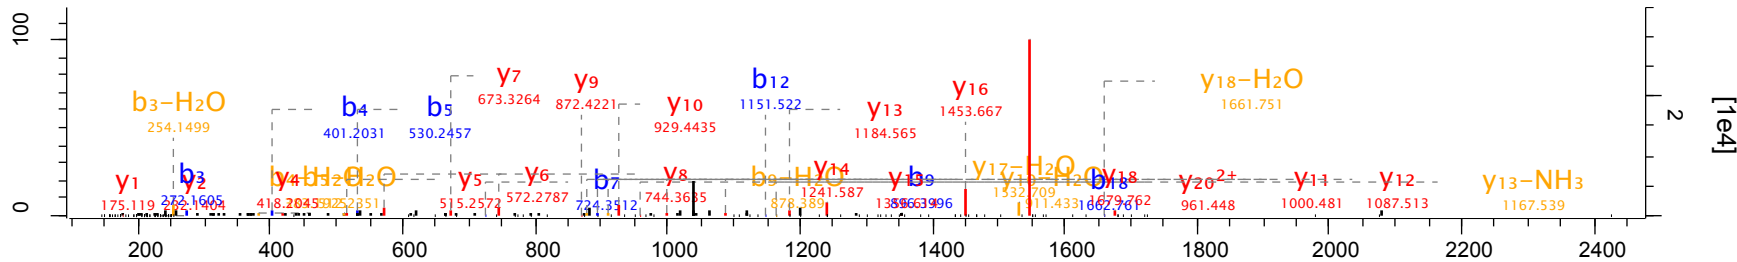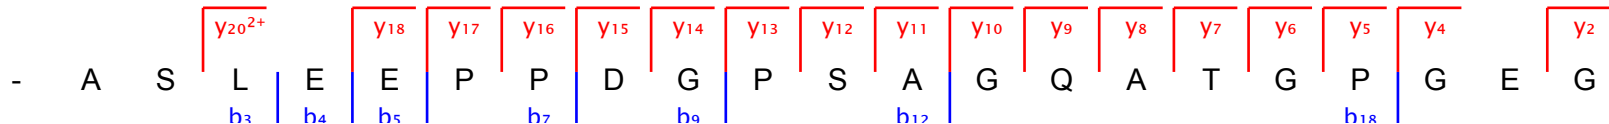

| Raw file                         | Scan  | Method   | Score | m/z   | Gene names |
|----------------------------------|-------|----------|-------|-------|------------|
| 20150226_Hela_Top_opt_A3_01_1591 | 23669 | TOF; CID | 41.17 | 819.4 | AMFR       |

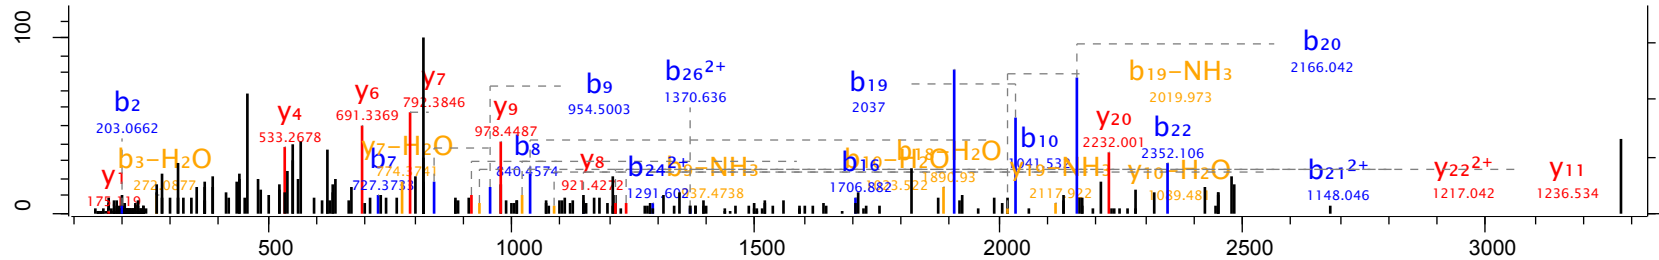

- S D | S I R P A | L N | S P V E R P S | S D | Q E | E |

b<sub>2</sub> | b<sub>7</sub> | b<sub>8</sub> | b<sub>9</sub> | b<sub>10</sub> | b<sub>16</sub> | b<sub>18</sub> | b<sub>19</sub> | b<sub>20</sub> | b<sub>21</sub><sup>2+</sup>

y<sub>22</sub><sup>2+</sup> | y<sub>20</sub> | y<sub>11</sub>

| Raw file                         | Scan  | Method   | Score | m/z    | Gene names |
|----------------------------------|-------|----------|-------|--------|------------|
| 20150226_Hela_Top_opt_A3_01_1591 | 24341 | TOF; CID | 54.34 | 697.33 | FAM120B    |

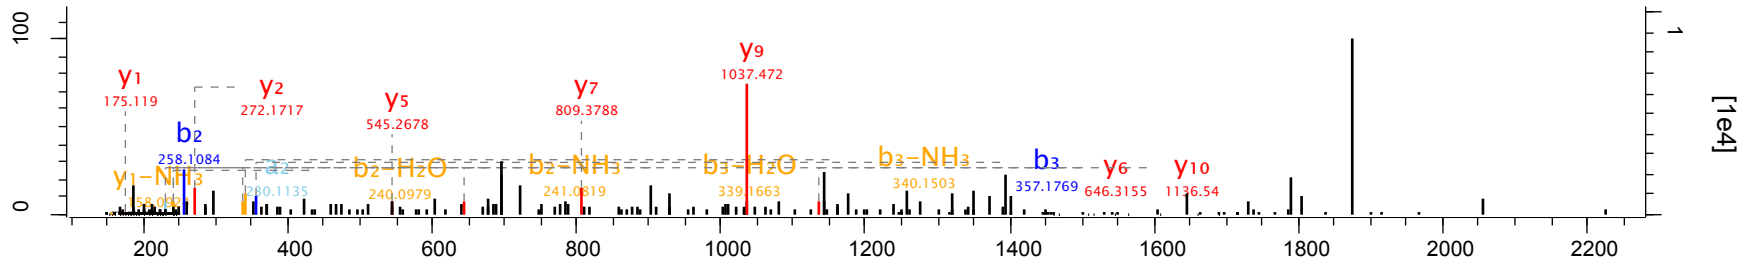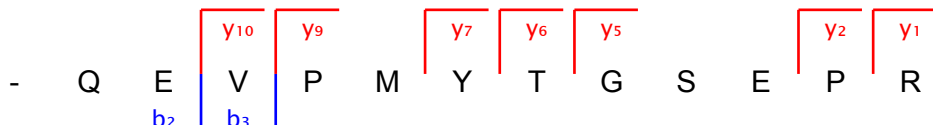

| Raw file                         | Scan  | Method   | Score | m/z    | Gene names |
|----------------------------------|-------|----------|-------|--------|------------|
| 20150226_Hela_Top_opt_A3_01_1591 | 25203 | TOF; CID | 61.34 | 629.27 | SLC11A2    |

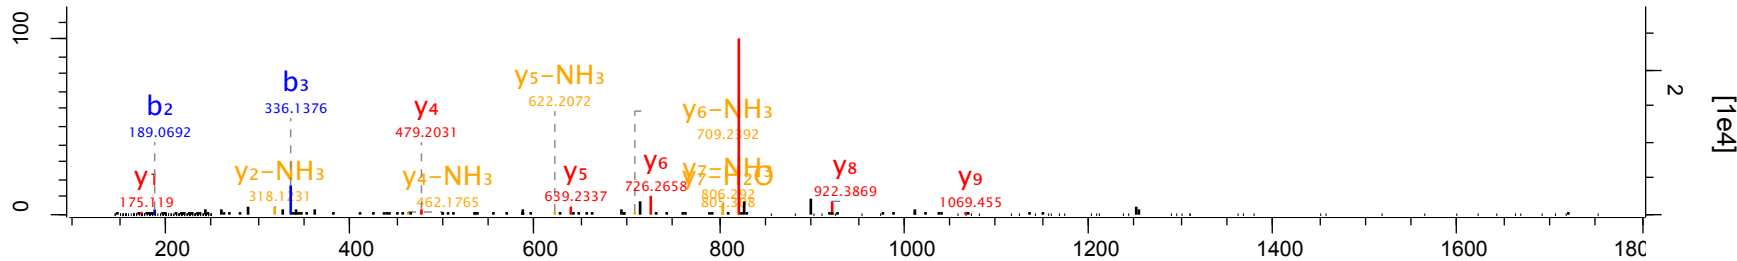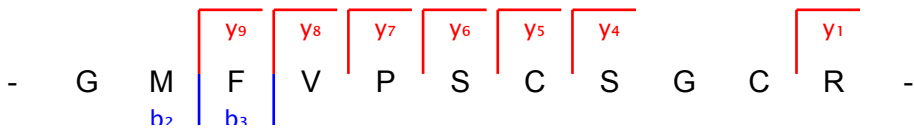



| Raw file                         | Scan  | Method   | Score | m/z    | Gene names |
|----------------------------------|-------|----------|-------|--------|------------|
| 20150226_Hela_Top_opt_A3_01_1591 | 25286 | TOF; CID | 61.93 | 677.31 | CORO2A     |

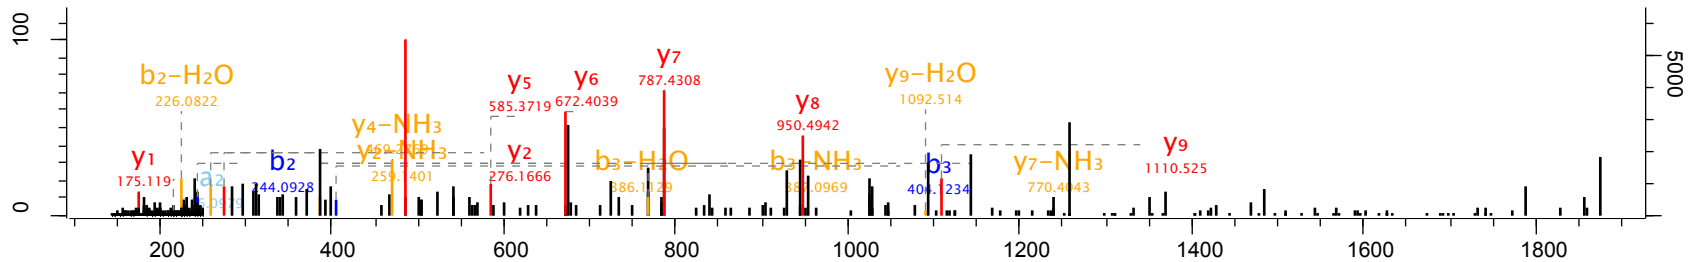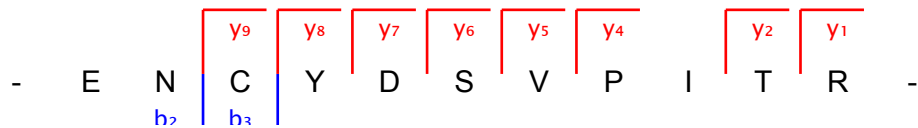

Raw file

20150226\_Hela\_Top\_opt\_A3\_01\_1591

Scan

25344

Method

TOF; CID

Score

45.35

m/z

811.43

Gene names

TPRN

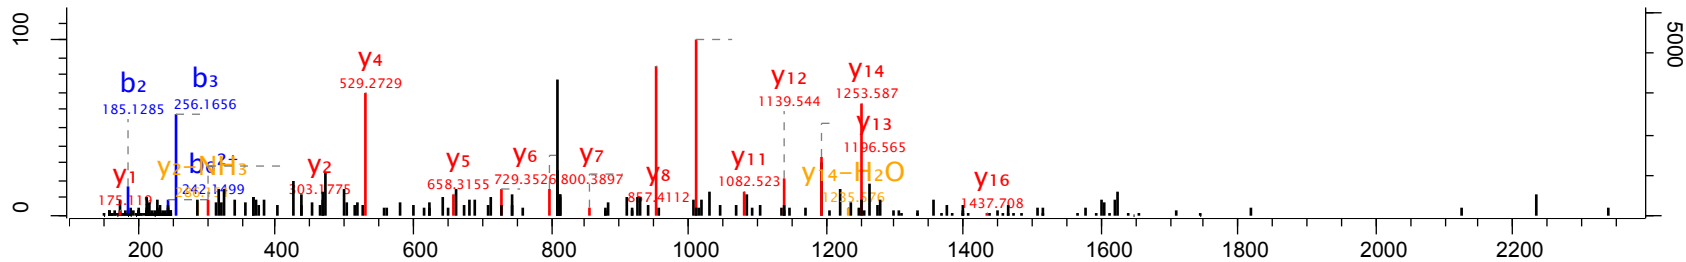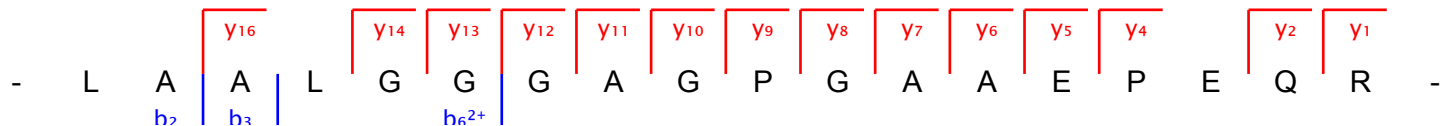

| Raw file                         | Scan  | Method   | Score | m/z    | Gene names |
|----------------------------------|-------|----------|-------|--------|------------|
| 20150226_Hela_Top_opt_A3_01_1591 | 25602 | TOF; CID | 72.43 | 643.34 | ERLEC1     |

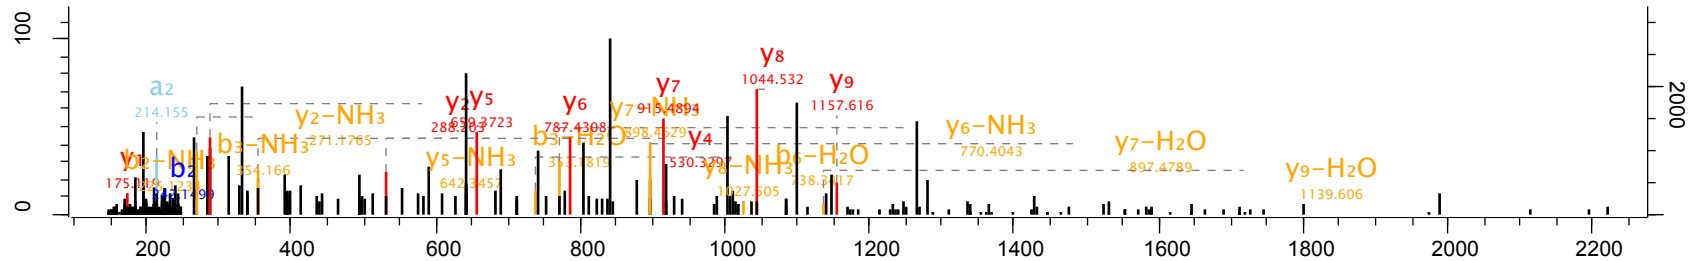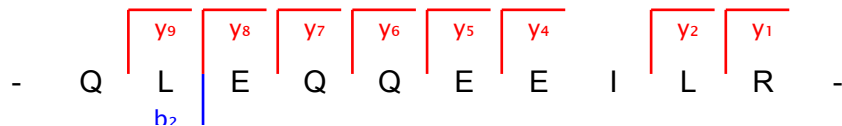

| Raw file                         | Scan  | Method   | Score | m/z    | Gene names |
|----------------------------------|-------|----------|-------|--------|------------|
| 20150226_Hela_Top_opt_A3_01_1591 | 25966 | TOF; CID | 52.49 | 589.82 | ARHGAP32   |

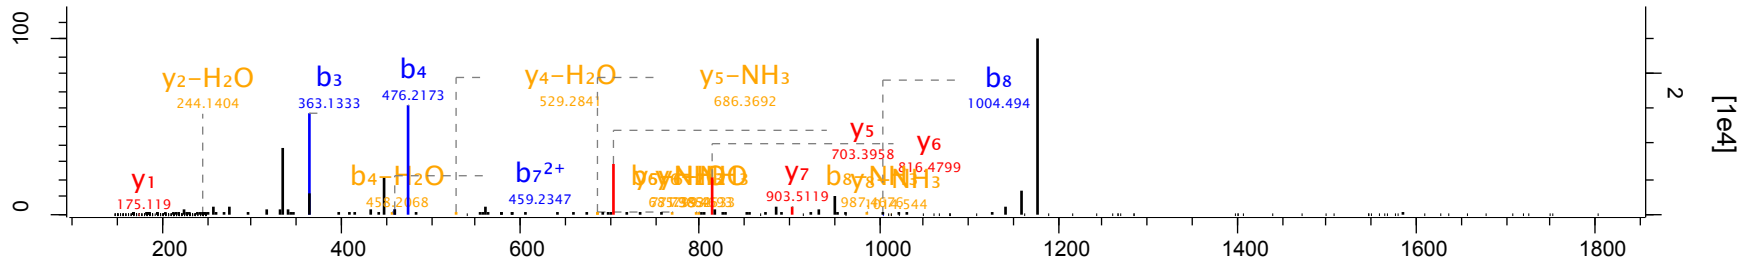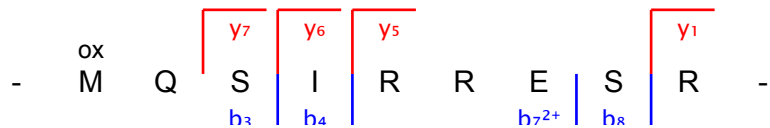

| Raw file                         | Scan  | Method   | Score  | m/z   | Gene names |
|----------------------------------|-------|----------|--------|-------|------------|
| 20150226_Hela_Top_opt_A3_01_1591 | 26681 | TOF; CID | 120.77 | 941.4 | ZNRD1      |

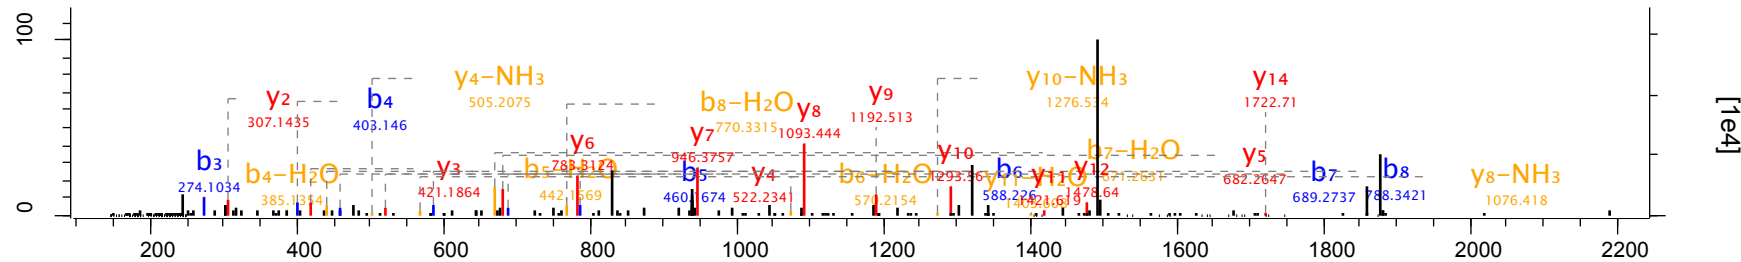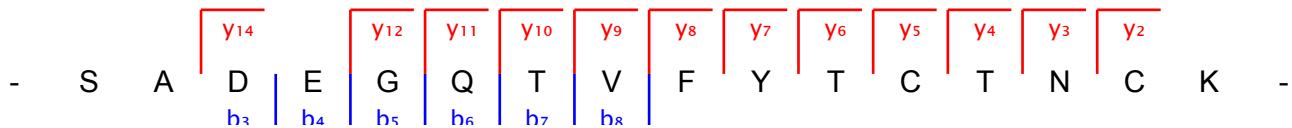

Raw file

20150226\_Hela\_Top\_opt\_A3\_01\_1591

Scan

26696

Method

TOF; CID

Score

137.45

m/z

657.31

Gene names

DYNLT3

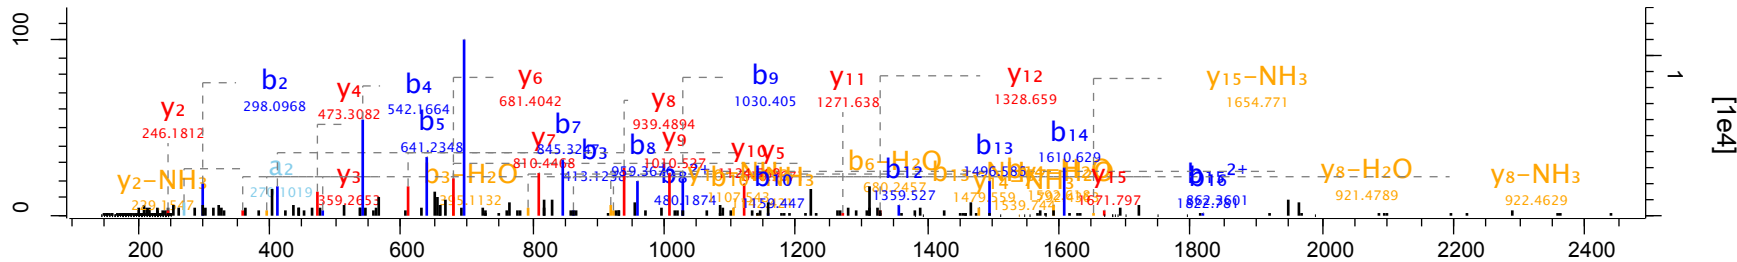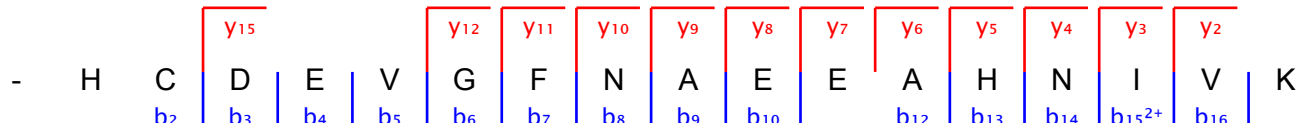

Raw file

Scan

Method

Score

m/z

Gene names

20150226\_Hela\_Top\_opt\_A3\_01\_1591

27112

TOF; CID

53.3

765.39

RILP

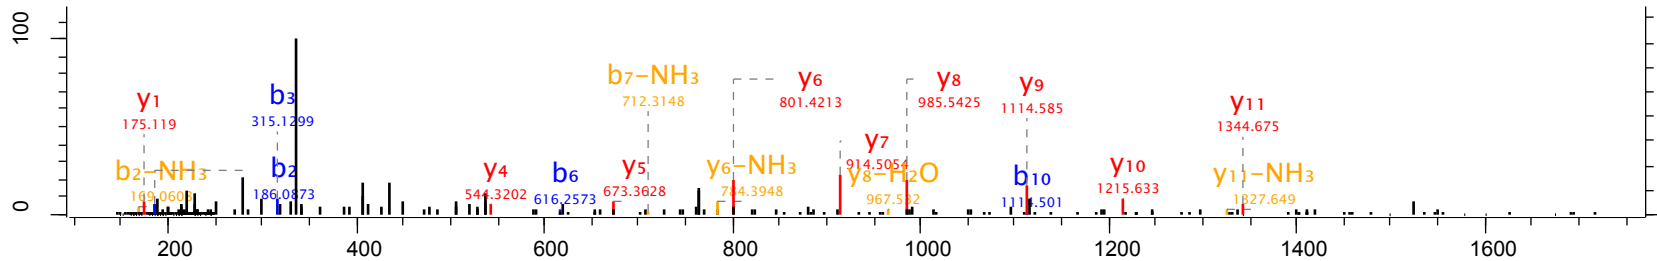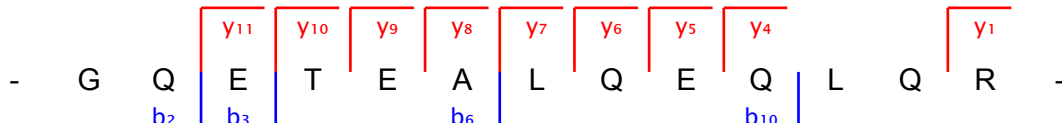

| Raw file                         | Scan  | Method   | Score | m/z    | Gene names |
|----------------------------------|-------|----------|-------|--------|------------|
| 20150226_Hela_Top_opt_A3_01_1591 | 28137 | TOF; CID | 48.62 | 601.31 | CST3       |

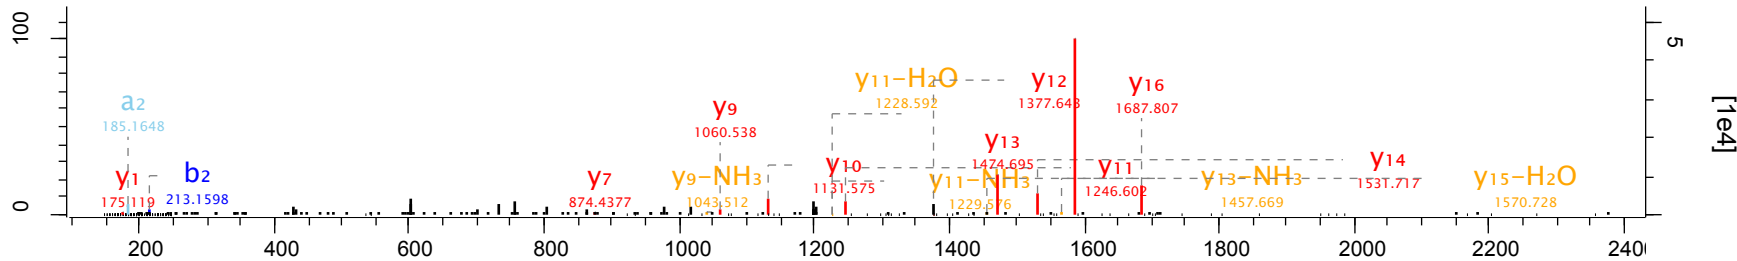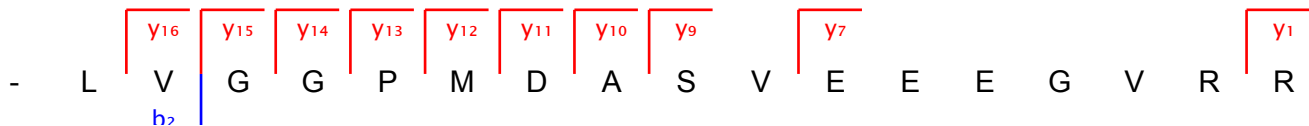



Raw file

20150226\_Hela\_Top\_opt\_A3\_01\_1591

Scan

28460

Method

TOF; CID

Score

103.14

m/z

780.36

Gene names

CSRP2

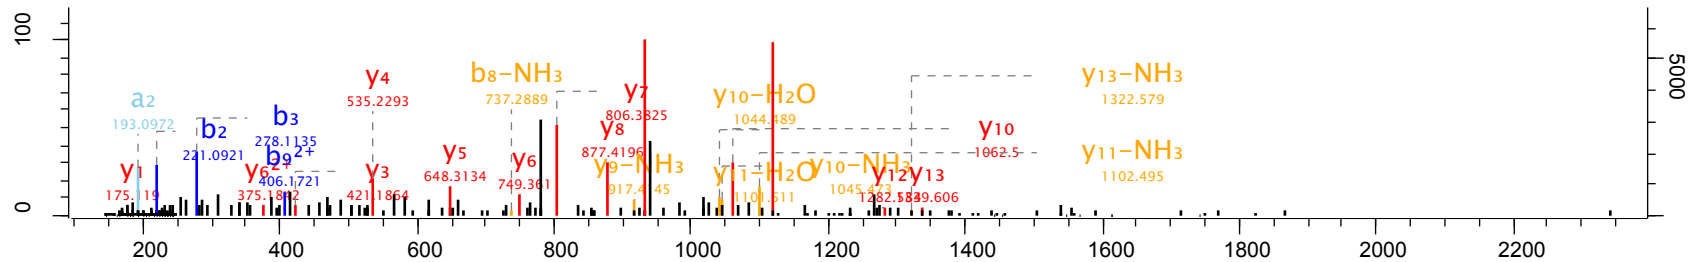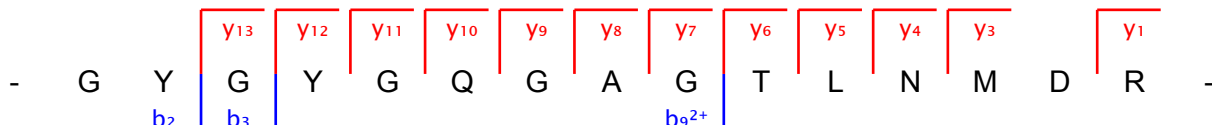

| Raw file                         | Scan  | Method   | Score | m/z    | Gene names |
|----------------------------------|-------|----------|-------|--------|------------|
| 20150226_Hela_Top_opt_A3_01_1591 | 28896 | TOF; CID | 58.43 | 451.26 | DOPEY2     |

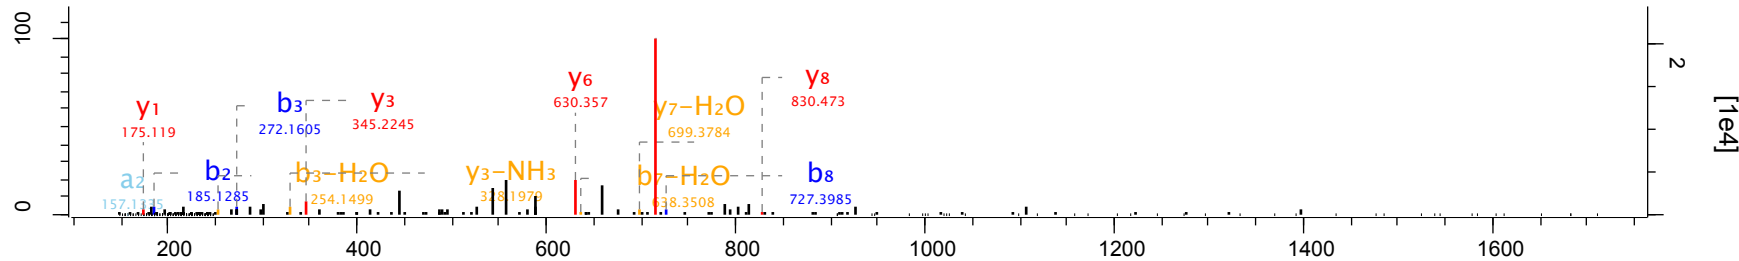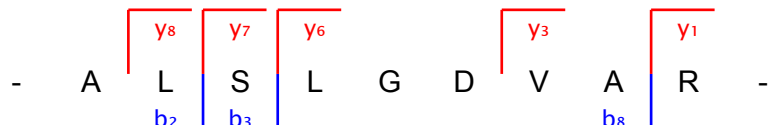

| Raw file                         | Scan  | Method   | Score  | m/z    | Gene names |
|----------------------------------|-------|----------|--------|--------|------------|
| 20150226_Hela_Top_opt_A3_01_1591 | 30278 | TOF; CID | 114.19 | 387.25 | RPP14      |

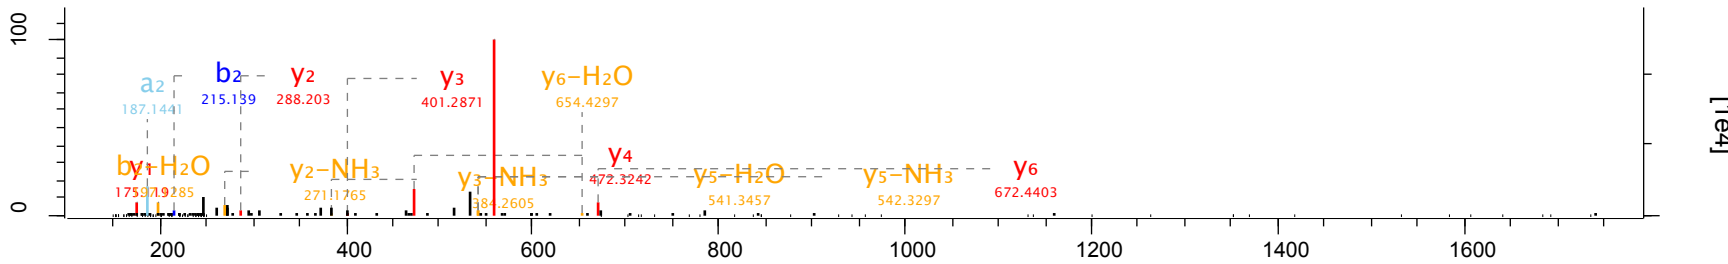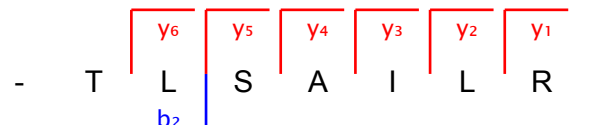

| Raw file                         | Scan  | Method   | Score | m/z    | Gene names |
|----------------------------------|-------|----------|-------|--------|------------|
| 20150226_Hela_Top_opt_A3_01_1591 | 30403 | TOF; CID | 85.26 | 310.87 | TLCD1      |

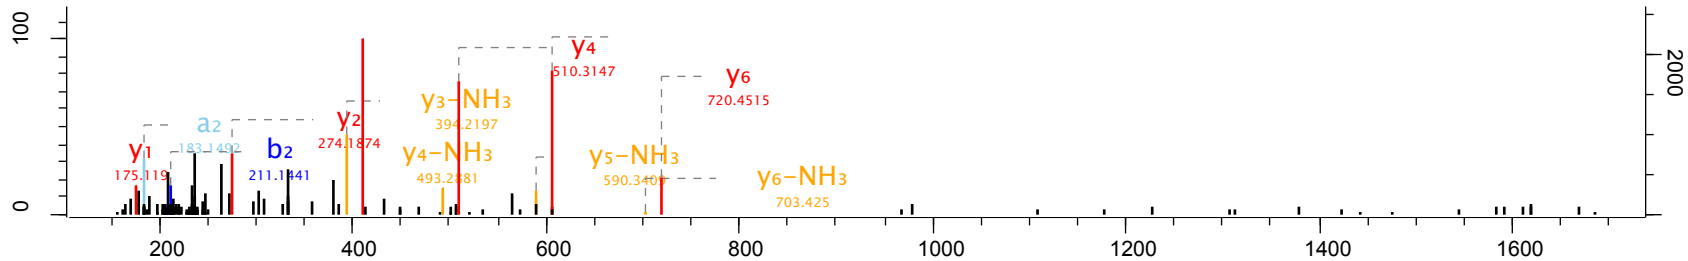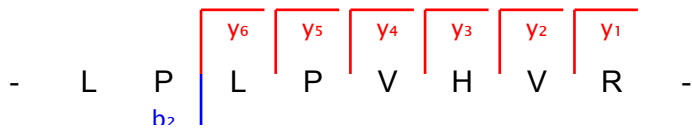

| Raw file                         | Scan  | Method   | Score | m/z    | Gene names |
|----------------------------------|-------|----------|-------|--------|------------|
| 20150226_Hela_Top_opt_A3_01_1591 | 30966 | TOF; CID | 58.63 | 861.41 | DPH3       |

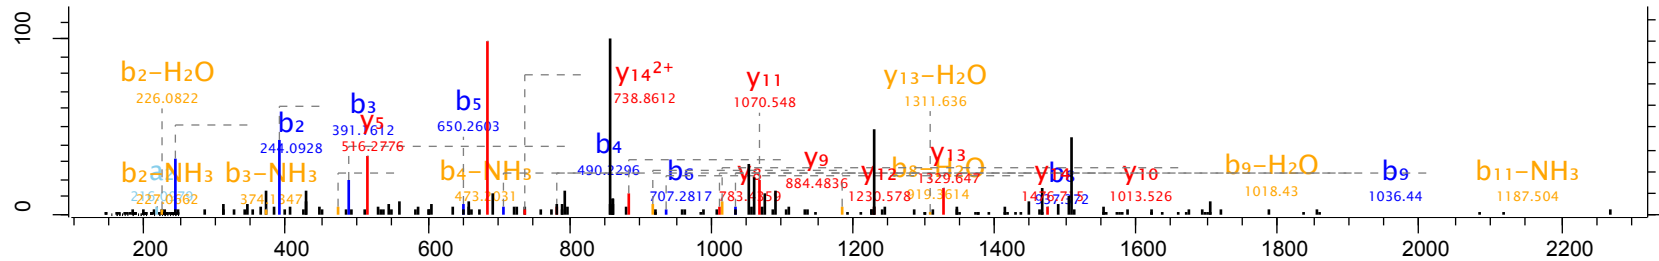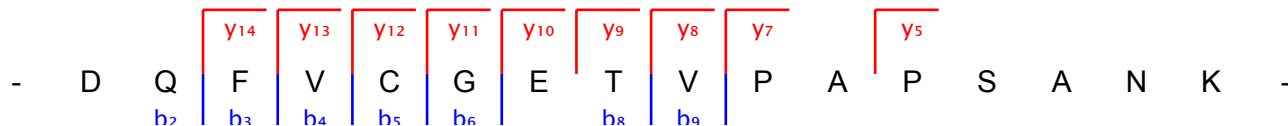

| Raw file                         | Scan  | Method   | Score | m/z    | Gene names |
|----------------------------------|-------|----------|-------|--------|------------|
| 20150226_Hela_Top_opt_A3_01_1591 | 32368 | TOF; CID | 92.47 | 397.75 | ZBTB25     |

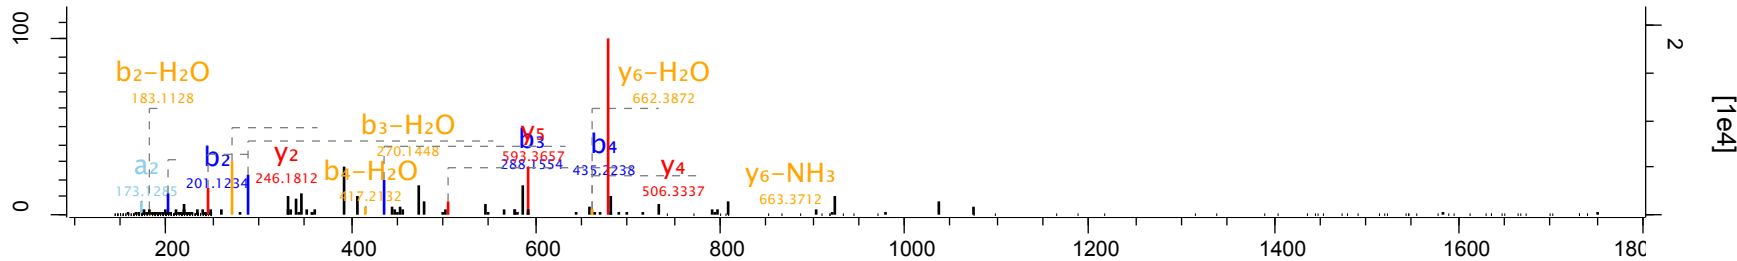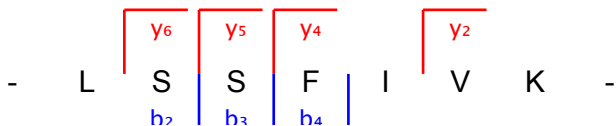

| Raw file                         | Scan  | Method   | Score | m/z   | Gene names |
|----------------------------------|-------|----------|-------|-------|------------|
| 20150226_Hela_Top_opt_A3_01_1591 | 33011 | TOF; CID | 95.77 | 558.8 | MTX3       |

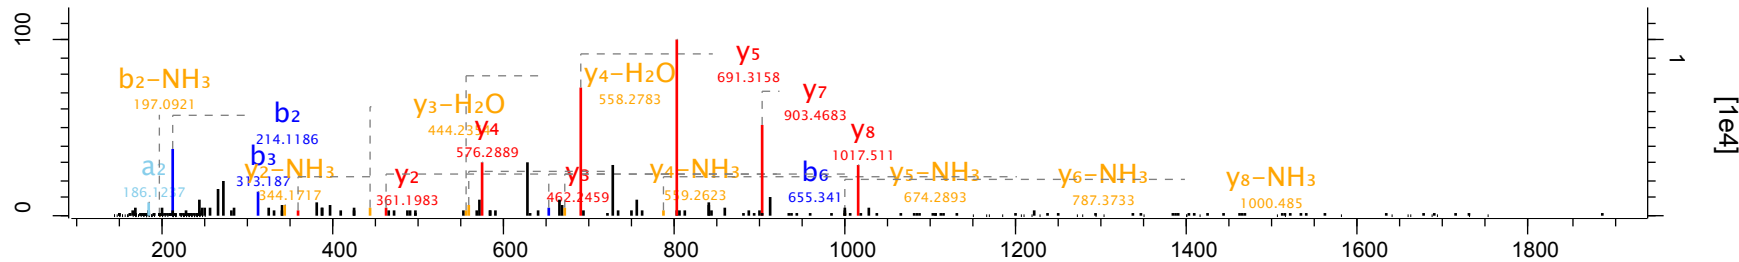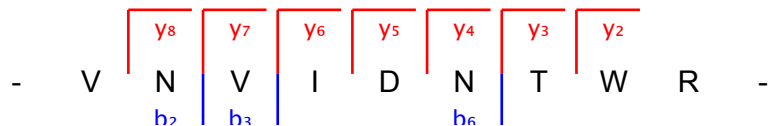

Raw file

20150226\_Hela\_Top\_opt\_A3\_01\_1591

Scan

33222

Method

TOF; CID

Score

100.88

m/z

556.82

Gene names

DCAKD

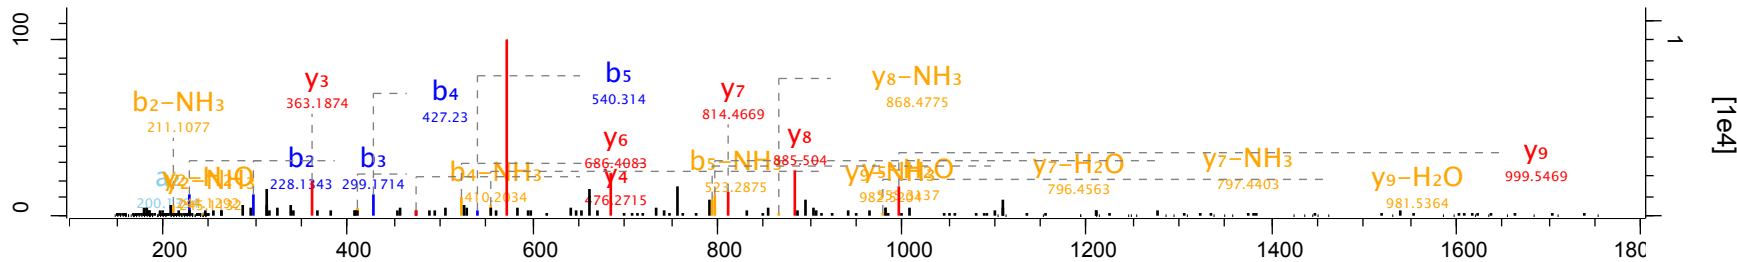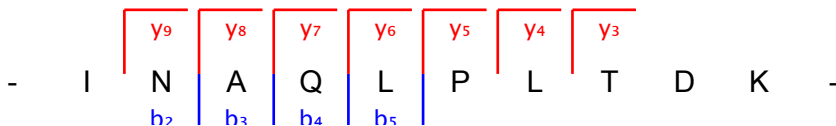



| Raw file                         | Scan  | Method   | Score | m/z    | Gene names |
|----------------------------------|-------|----------|-------|--------|------------|
| 20150226_Hela_Top_opt_A3_01_1591 | 33381 | TOF; CID | 67.1  | 744.39 | MGST2      |

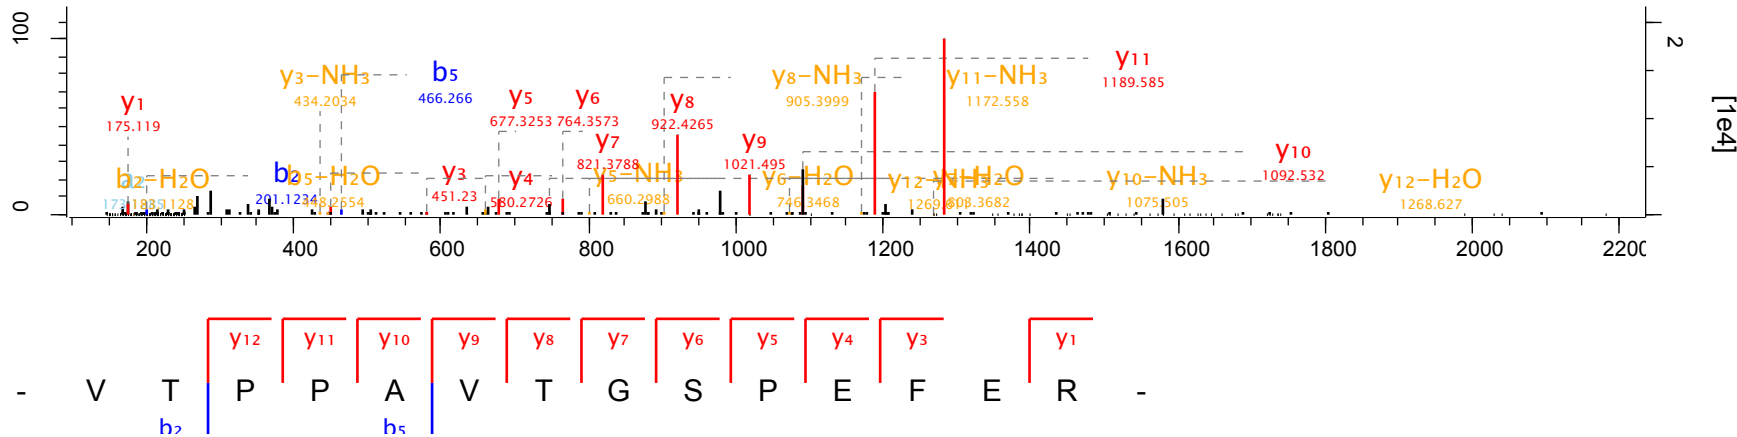

| Raw file                         | Scan  | Method   | Score | m/z    | Gene names |
|----------------------------------|-------|----------|-------|--------|------------|
| 20150226_Hela_Top_opt_A3_01_1591 | 33468 | TOF; CID | 107.5 | 947.43 | MID1       |

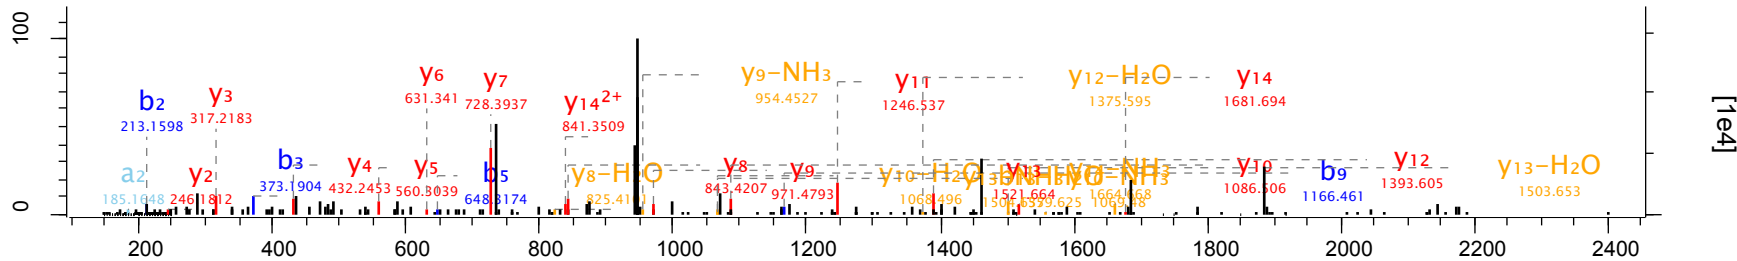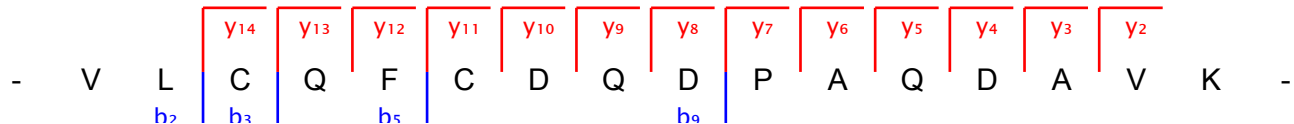

| Raw file                         | Scan  | Method   | Score | m/z    | Gene names |
|----------------------------------|-------|----------|-------|--------|------------|
| 20150226_Hela_Top_opt_A3_01_1591 | 33666 | TOF; CID | 60.55 | 740.37 | TRAPPC6B   |

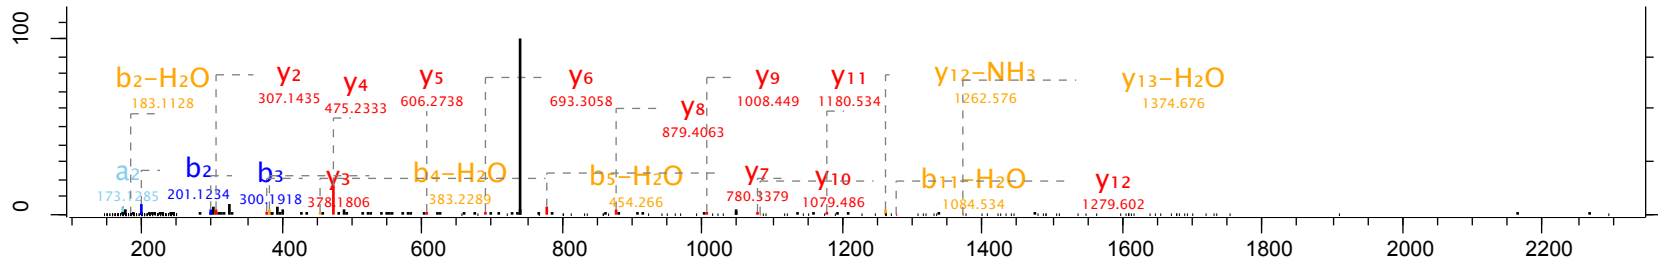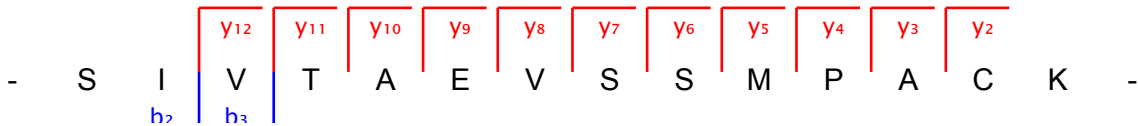

[1e4]

| Raw file                         | Scan  | Method   | Score | m/z    | Gene names |
|----------------------------------|-------|----------|-------|--------|------------|
| 20150226_Hela_Top_opt_A3_01_1591 | 33881 | TOF; CID | 80.87 | 635.83 | WWTR1      |

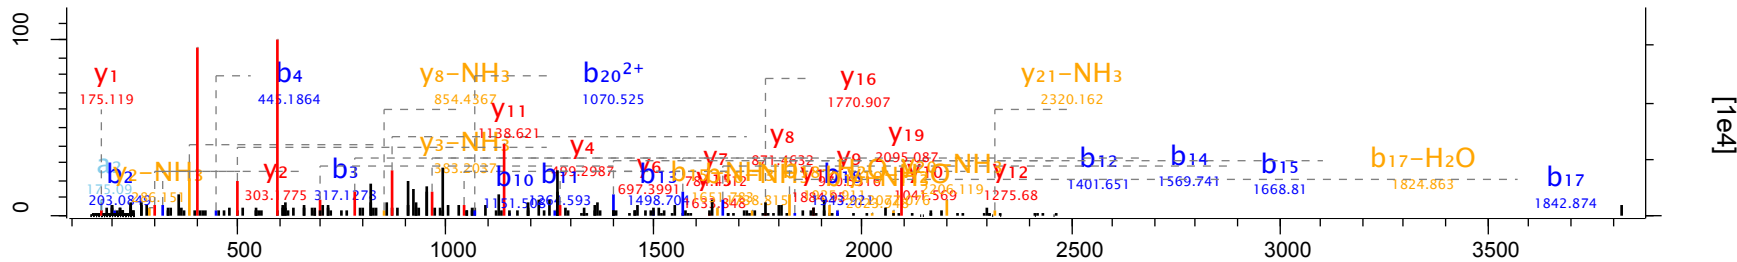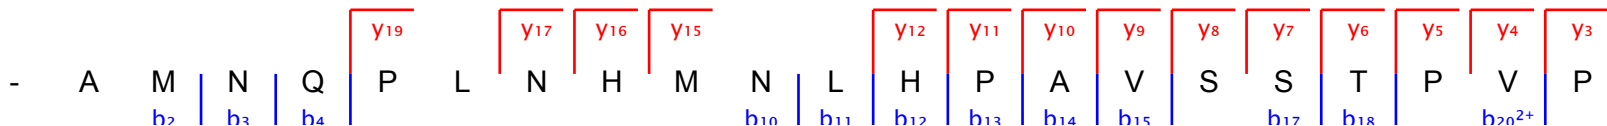

| Raw file                         | Scan  | Method   | Score | m/z    | Gene names |
|----------------------------------|-------|----------|-------|--------|------------|
| 20150226_Hela_Top_opt_A3_01_1591 | 33934 | TOF; CID | 64.8  | 729.87 | KCT2       |

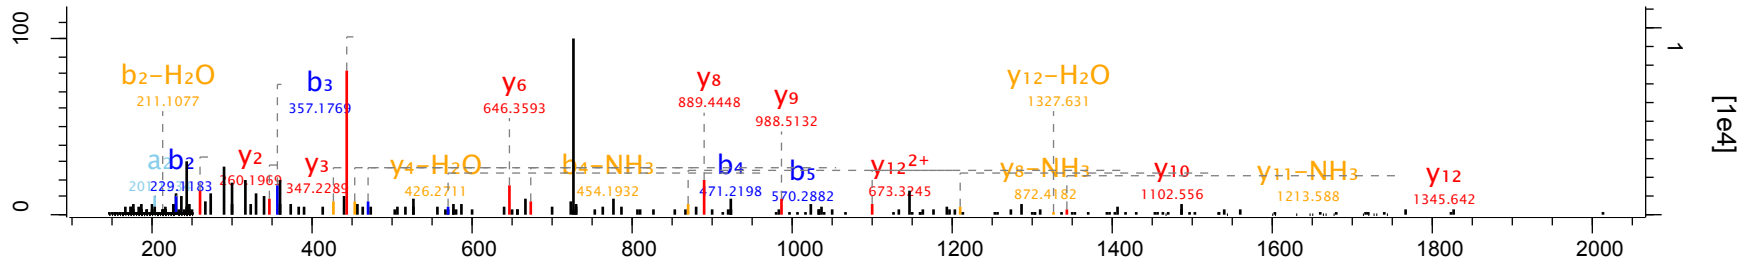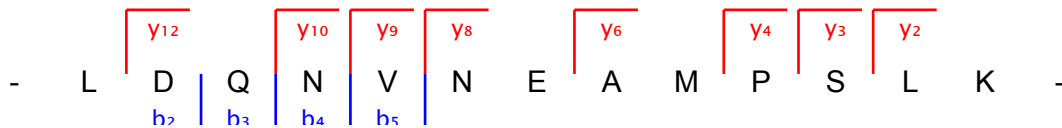

| Raw file                         | Scan  | Method   | Score | m/z    | Gene names |
|----------------------------------|-------|----------|-------|--------|------------|
| 20150226_Hela_Top_opt_A3_01_1591 | 34175 | TOF; CID | 69.2  | 479.23 | MAPKAPK5   |

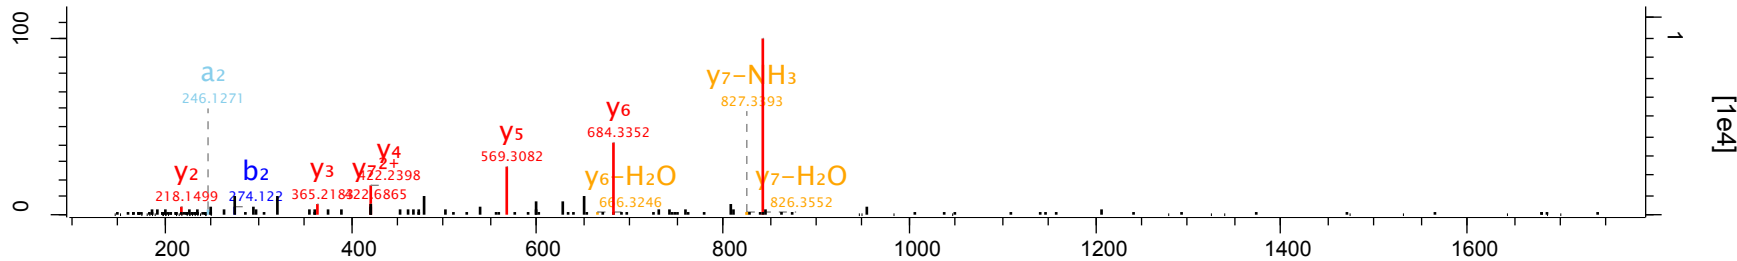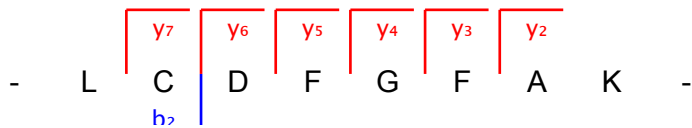

| Raw file                         | Scan  | Method   | Score | m/z    | Gene names |
|----------------------------------|-------|----------|-------|--------|------------|
| 20150226_Hela_Top_opt_A3_01_1591 | 34255 | TOF; CID | 52.46 | 639.84 | THTPA      |

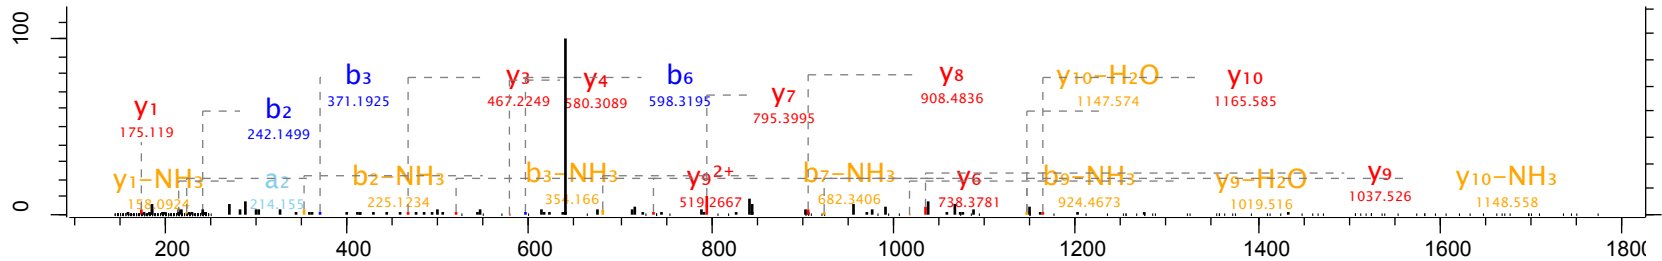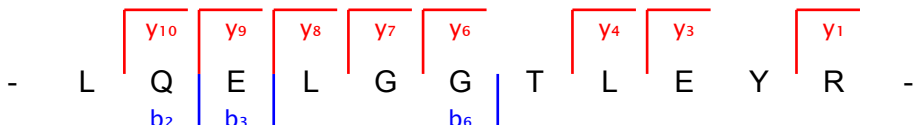

[1e4]

Raw file

20150226\_Hela\_Top\_opt\_A3\_01\_1591

Scan

34923

Method

TOF; CID

Score

47.77

m/z

844.91

Gene names

MYBPC3

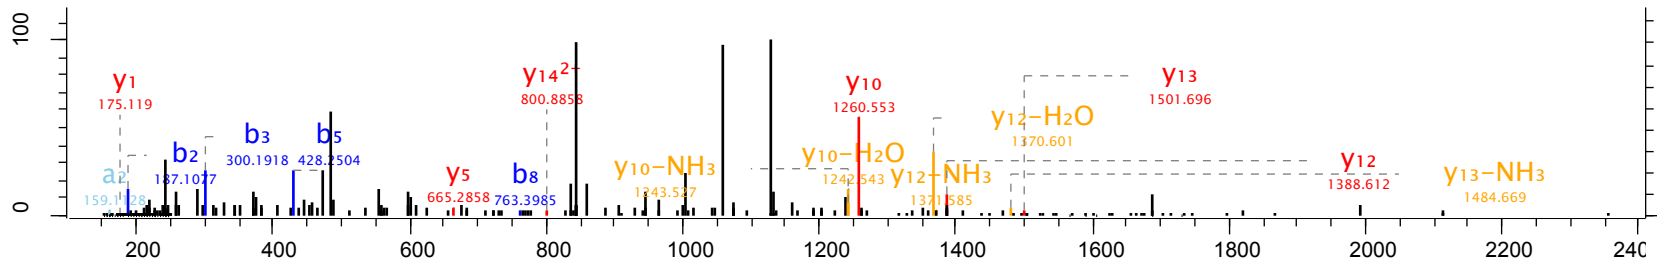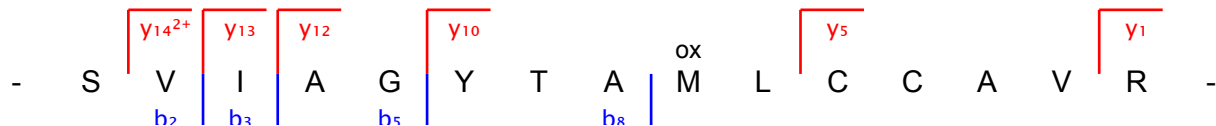



Raw file

20150226\_Hela\_Top\_opt\_A3\_01\_1591

Scan

34924

Method

TOF; CID

Score

110.6

m/z

806.39

Gene names

USMG5

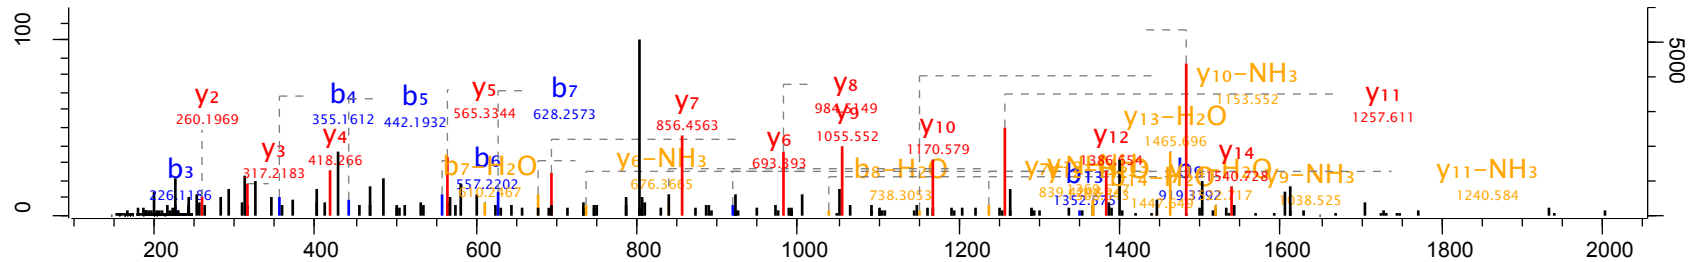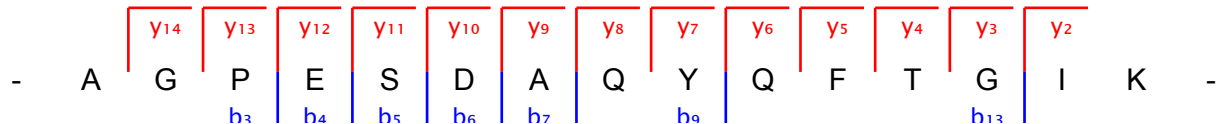

| Raw file                         | Scan  | Method   | Score | m/z    | Gene names |
|----------------------------------|-------|----------|-------|--------|------------|
| 20150226_Hela_Top_opt_A3_01_1591 | 35132 | TOF; CID | 55.26 | 649.35 | PVR        |

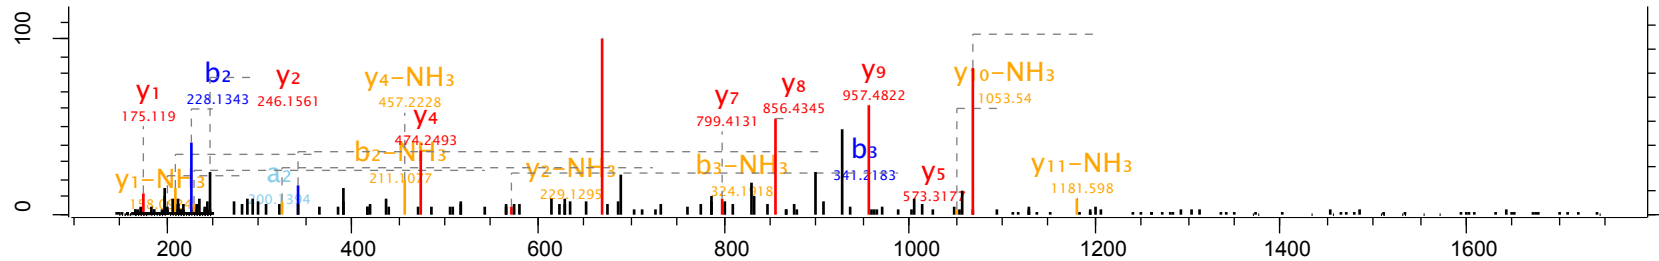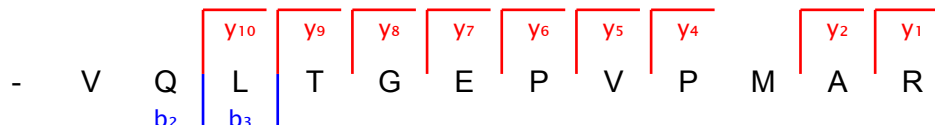

| Raw file                         | Scan  | Method   | Score | m/z    | Gene names  |
|----------------------------------|-------|----------|-------|--------|-------------|
| 20150226_Hela_Top_opt_A3_01_1591 | 35586 | TOF; CID | 68.48 | 795.41 | PIAS1;PIAS2 |

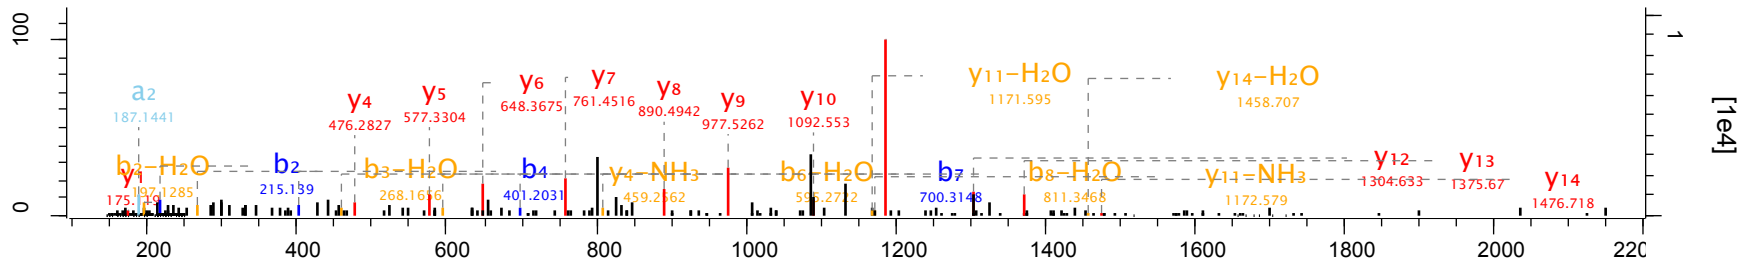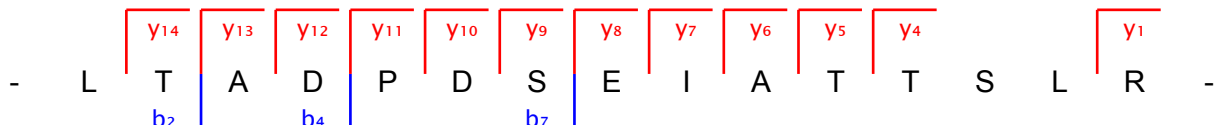

| Raw file                         | Scan  | Method   | Score | m/z    | Gene names |
|----------------------------------|-------|----------|-------|--------|------------|
| 20150226_Hela_Top_opt_A3_01_1591 | 36084 | TOF; CID | 84.61 | 550.81 | COX19      |

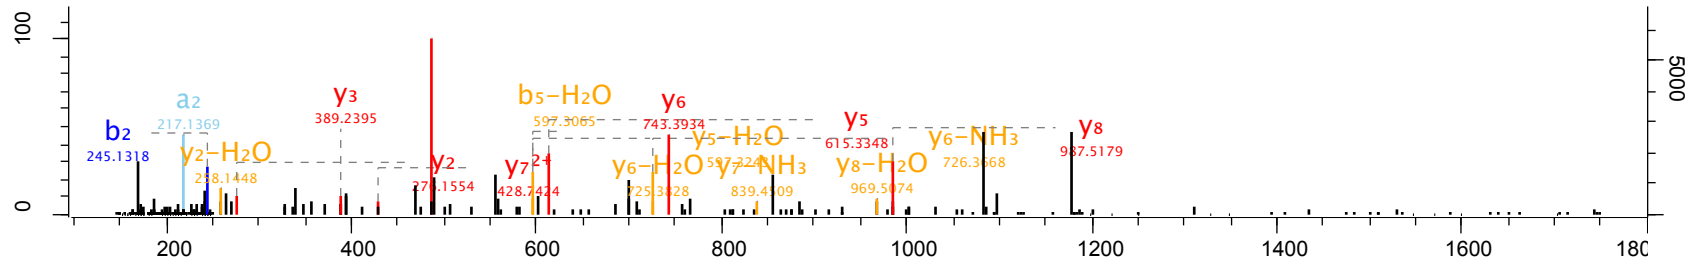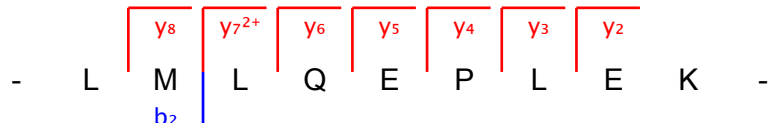

Raw file

20150226\_Hela\_Top\_opt\_A3\_01\_1591

Scan

37959

Method

TOF; CID

Score

110.55

m/z

953.11

Gene names

C6orf120

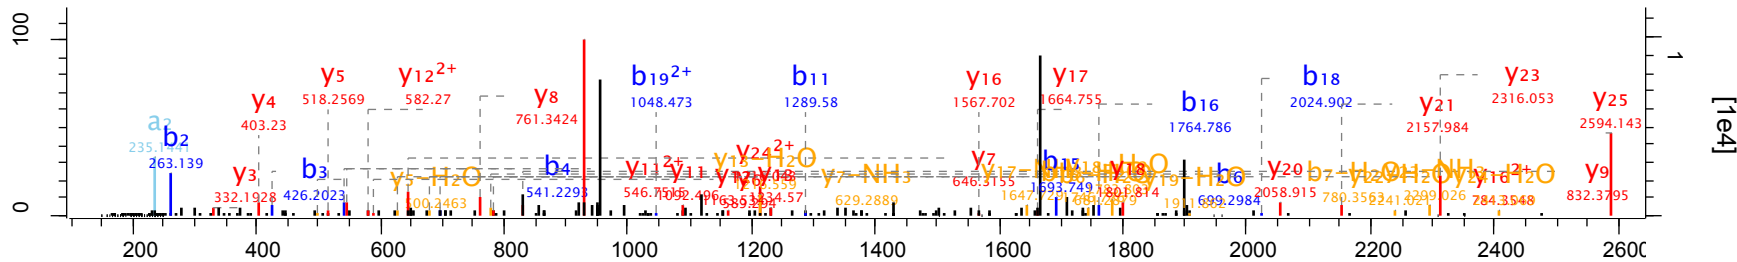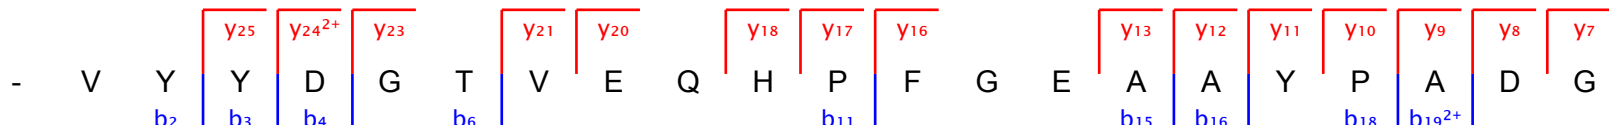

| Raw file                         | Scan  | Method   | Score | m/z    | Gene names |
|----------------------------------|-------|----------|-------|--------|------------|
| 20150226_Hela_Top_opt_A3_01_1591 | 39376 | TOF; CID | 93.37 | 489.77 | MRPS24     |

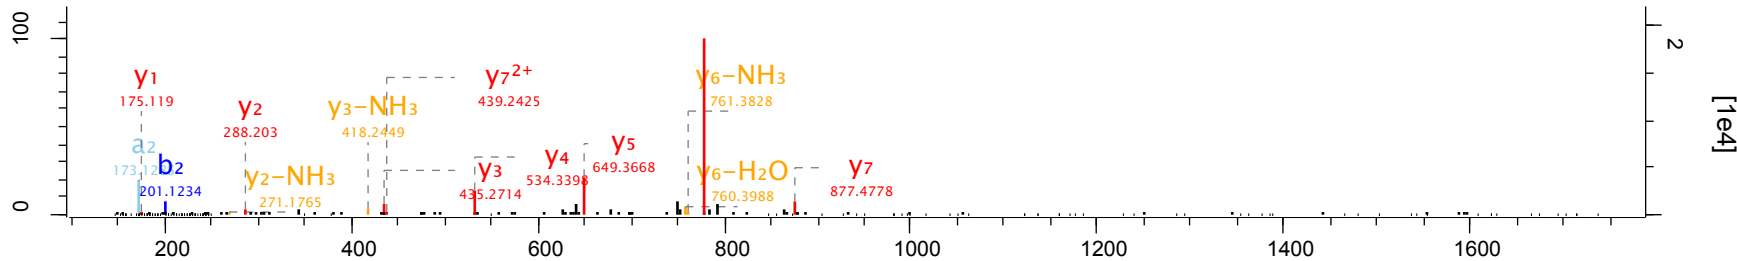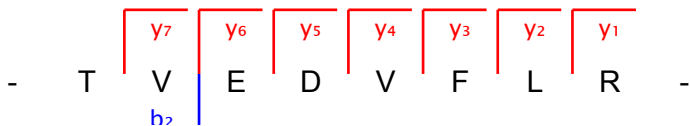

| Raw file                         | Scan  | Method   | Score | m/z    | Gene names        |
|----------------------------------|-------|----------|-------|--------|-------------------|
| 20150226_Hela_Top_opt_A3_01_1591 | 39888 | TOF; CID | 53.38 | 618.86 | SLC25A36;SLC25A33 |

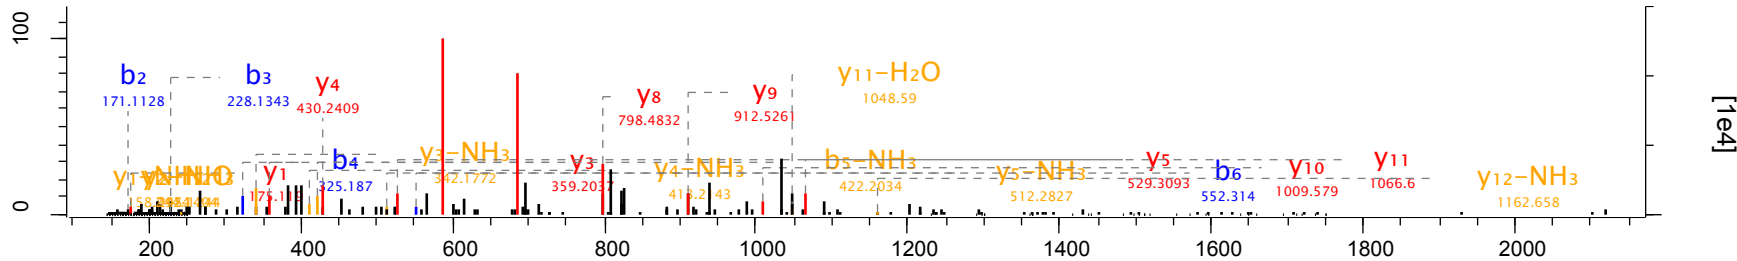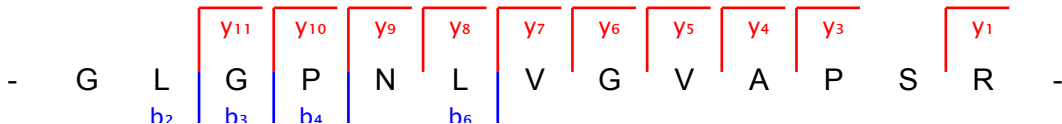

Raw file

20150226\_Hela\_Top\_opt\_A3\_01\_1591

Scan

39947

Method

TOF; CID

Score

65.24

m/z

1004.48

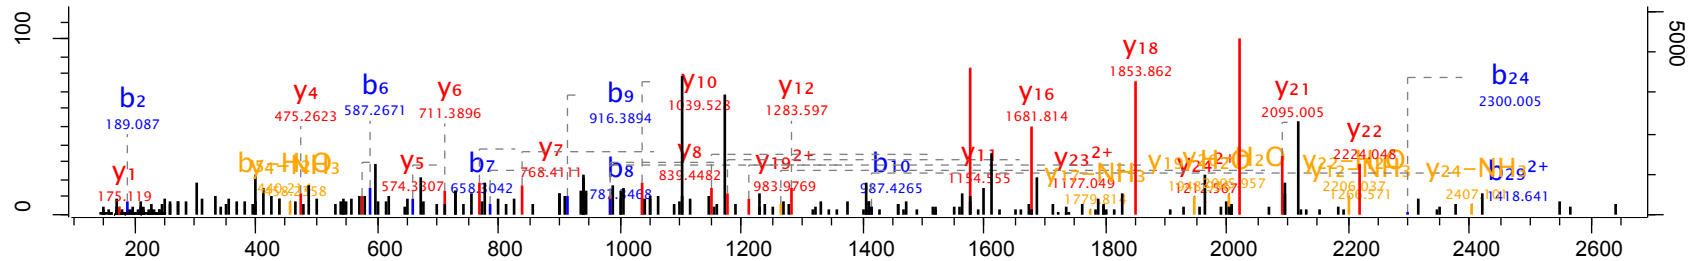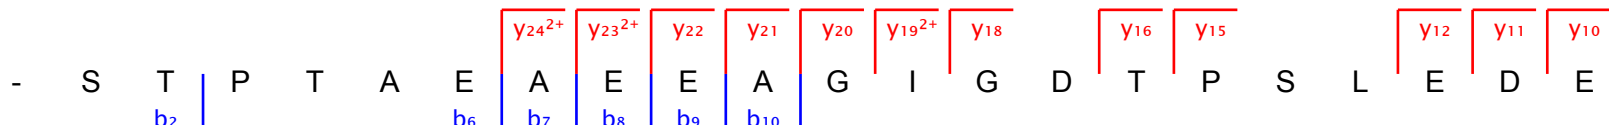



Raw file

20150226\_Hela\_Top\_opt\_A3\_01\_1591

Scan

40053

Method

TOF; CID

Score

50.35

m/z

632.83

Gene names

BECN1

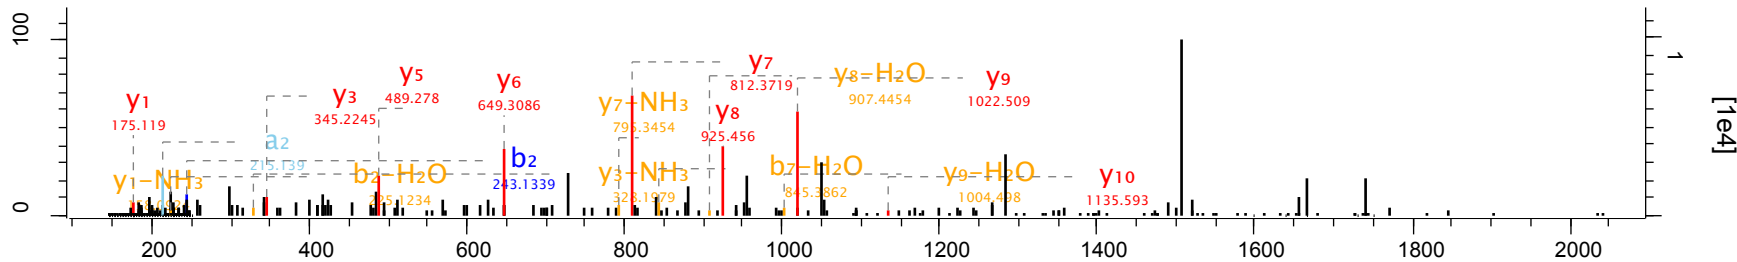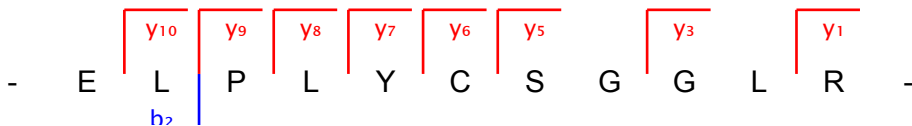

| Raw file                         | Scan  | Method   | Score | m/z    | Gene names |
|----------------------------------|-------|----------|-------|--------|------------|
| 20150226_Hela_Top_opt_A3_01_1591 | 40613 | TOF; CID | 68.86 | 545.95 | COX16      |

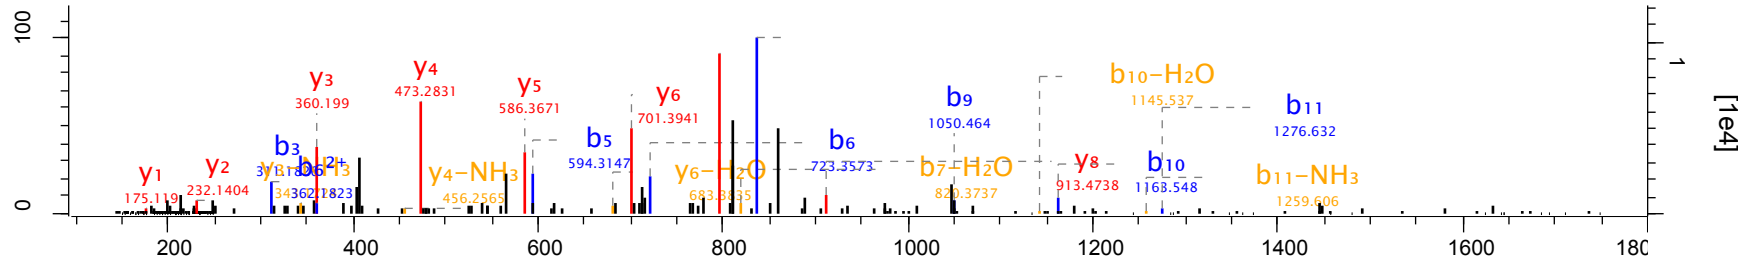

Sequence: - G P R | P W | E D | P D | L L | Q G R -

Fragmentation sites (b<sub>i</sub> and y<sub>i</sub>) are indicated by vertical lines below the sequence:

- Blue lines (b<sub>i</sub>): b<sub>3</sub> (between R and P), b<sub>5</sub> (between W and E), b<sub>6</sub> (between E and D), b<sub>7</sub> (between D and P), b<sub>9</sub> (between D and L), b<sub>10</sub> (between L and L), b<sub>11</sub> (between L and Q).
- Red lines (y<sub>i</sub>): y<sub>1</sub> (after R), y<sub>2</sub> (after G), y<sub>3</sub> (after Q), y<sub>4</sub> (after L), y<sub>5</sub> (after L), y<sub>6</sub> (after D), y<sub>7</sub> (after P), y<sub>8</sub> (after D).

| Raw file                         | Scan  | Method   | Score  | m/z    | Gene names |
|----------------------------------|-------|----------|--------|--------|------------|
| 20150226_Hela_Top_opt_A3_01_1591 | 40746 | TOF; CID | 140.28 | 971.94 | HIGD1A     |

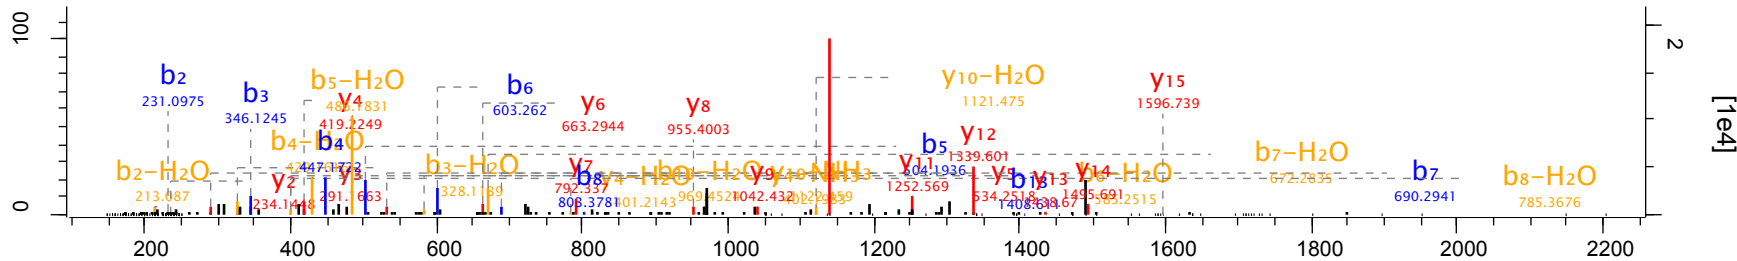

ac

- S T D T G V S L P S Y E E D Q G S K -

h<sub>2</sub> | h<sub>3</sub> | h<sub>4</sub> | h<sub>5</sub> | h<sub>6</sub> | h<sub>7</sub> | h<sub>8</sub> | h<sub>13</sub>

y<sub>15</sub> | y<sub>14</sub> | y<sub>13</sub> | y<sub>12</sub> | y<sub>11</sub> | y<sub>10</sub> | y<sub>9</sub> | y<sub>8</sub> | y<sub>7</sub> | y<sub>6</sub> | y<sub>5</sub> | y<sub>4</sub> | y<sub>3</sub> | y<sub>2</sub>

| Raw file                         | Scan  | Method   | Score | m/z    | Gene names |
|----------------------------------|-------|----------|-------|--------|------------|
| 20150226_Hela_Top_opt_A3_01_1591 | 41012 | TOF; CID | 82.07 | 773.88 | MEA1       |

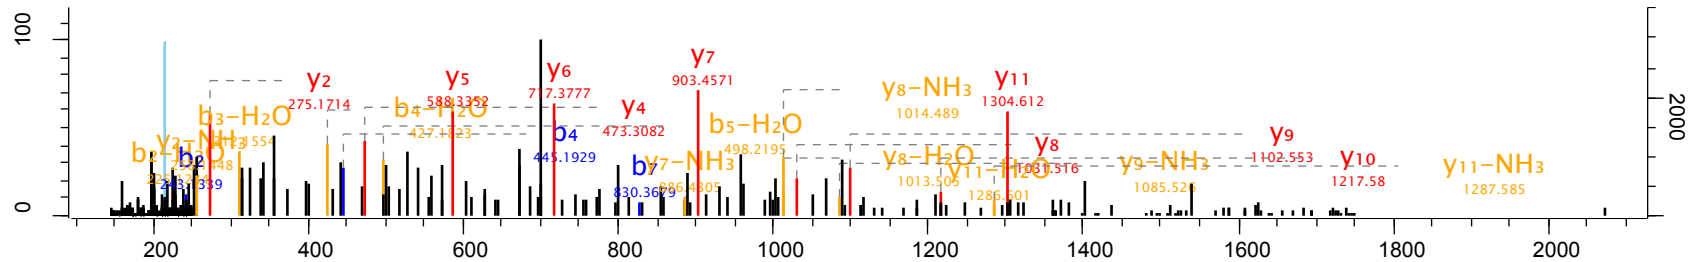

- E I S D A Q W E D V V Q K -  
 b<sub>2</sub> b<sub>4</sub> b<sub>7</sub>

y<sub>11</sub> y<sub>10</sub> y<sub>9</sub> y<sub>8</sub> y<sub>7</sub> y<sub>6</sub> y<sub>5</sub> y<sub>4</sub> y<sub>2</sub>

| Raw file                         | Scan  | Method   | Score | m/z    | Gene names |
|----------------------------------|-------|----------|-------|--------|------------|
| 20150226_Hela_Top_opt_A3_01_1591 | 41308 | TOF; CID | 66.54 | 735.91 | TRIM11     |

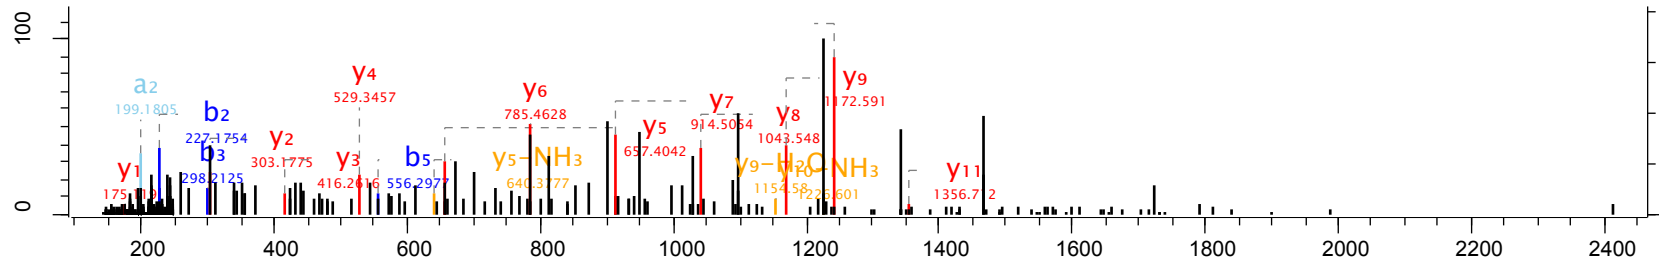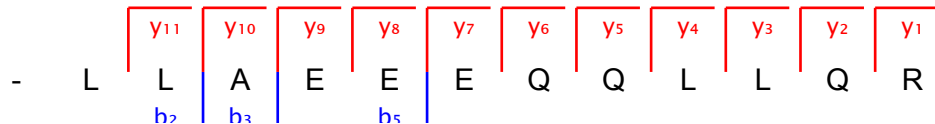

| Raw file                         | Scan  | Method   | Score | m/z   | Gene names |
|----------------------------------|-------|----------|-------|-------|------------|
| 20150226_Hela_Top_opt_A3_01_1591 | 41658 | TOF; CID | 66.83 | 853.4 | TMEM179B   |

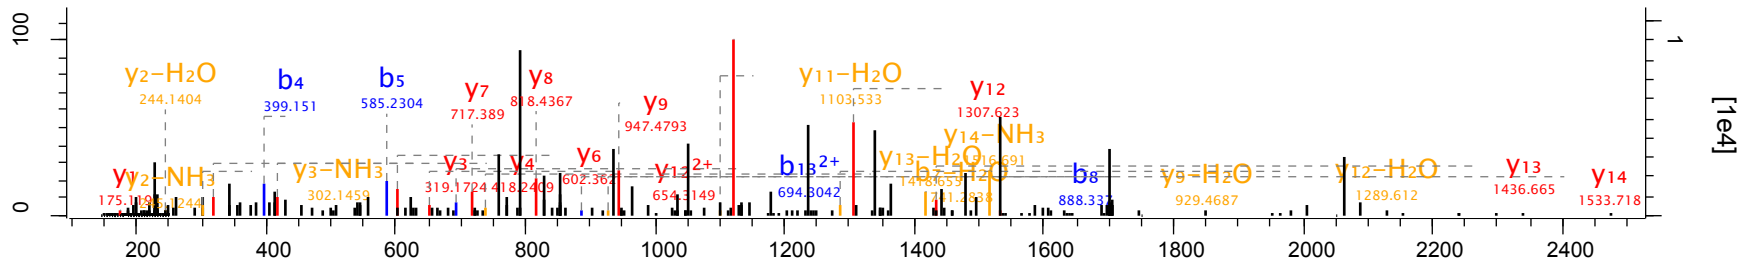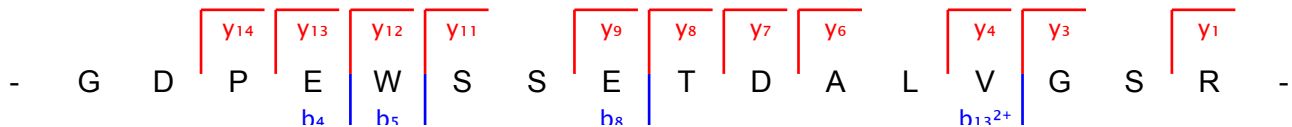

Raw file

20150226\_Hela\_Top\_opt\_A3\_01\_1591

Scan

42436

Method

TOF; CID

Score

75.55

m/z

734.66

Gene names

ELOF1

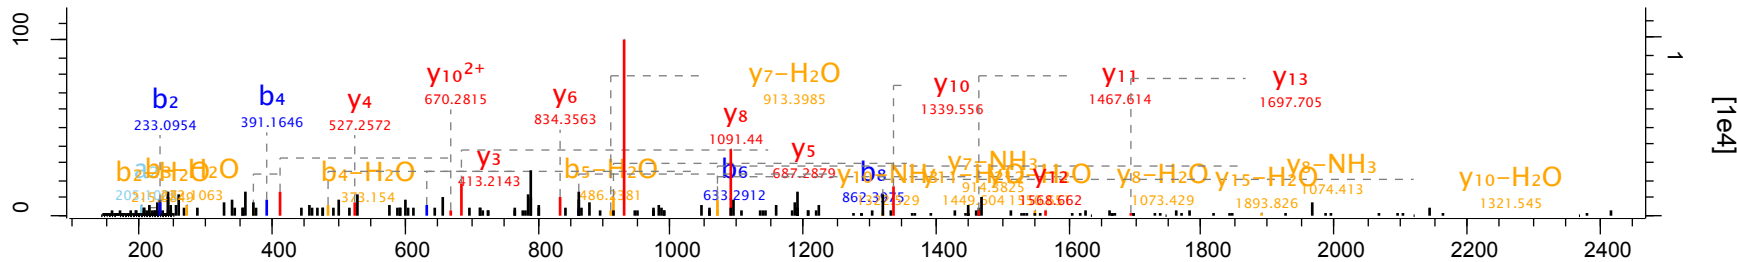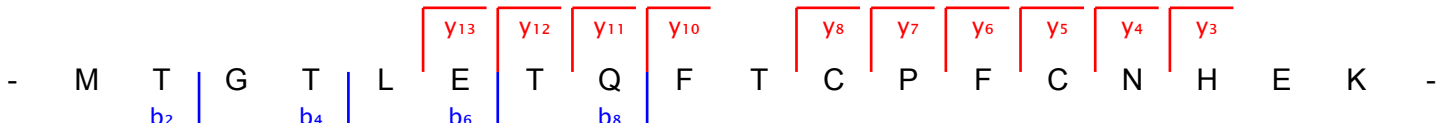

| Raw file                         | Scan  | Method   | Score  | m/z    | Gene names |
|----------------------------------|-------|----------|--------|--------|------------|
| 20150226_Hela_Top_opt_A3_01_1591 | 42476 | TOF; CID | 151.17 | 446.28 | RRAS       |

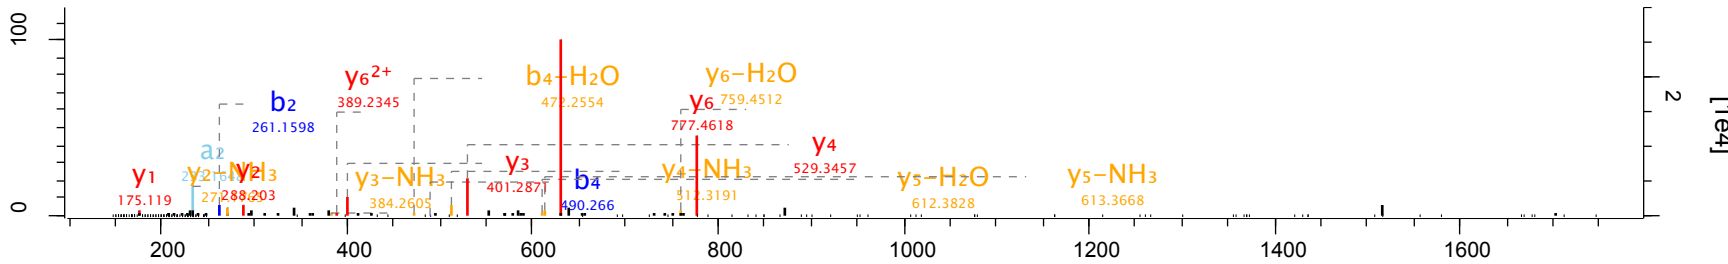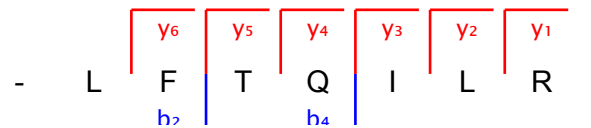



| Raw file                         | Scan  | Method   | Score | m/z   | Gene names |
|----------------------------------|-------|----------|-------|-------|------------|
| 20150226_Hela_Top_opt_A3_01_1591 | 43914 | TOF; CID | 57.4  | 622.8 | LIPA       |

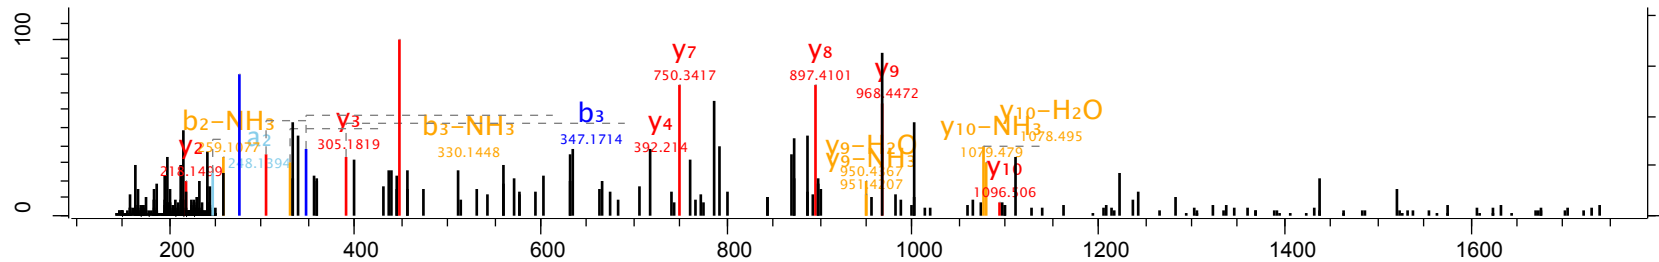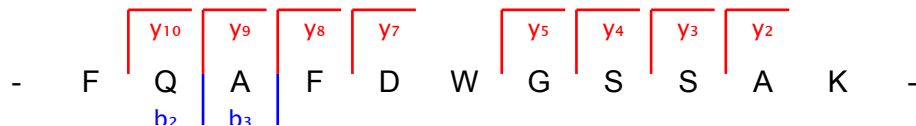

| Raw file                         | Scan  | Method   | Score | m/z    | Gene names |
|----------------------------------|-------|----------|-------|--------|------------|
| 20150226_Hela_Top_opt_A3_01_1591 | 44157 | TOF; CID | 46.88 | 586.84 | PHF23      |

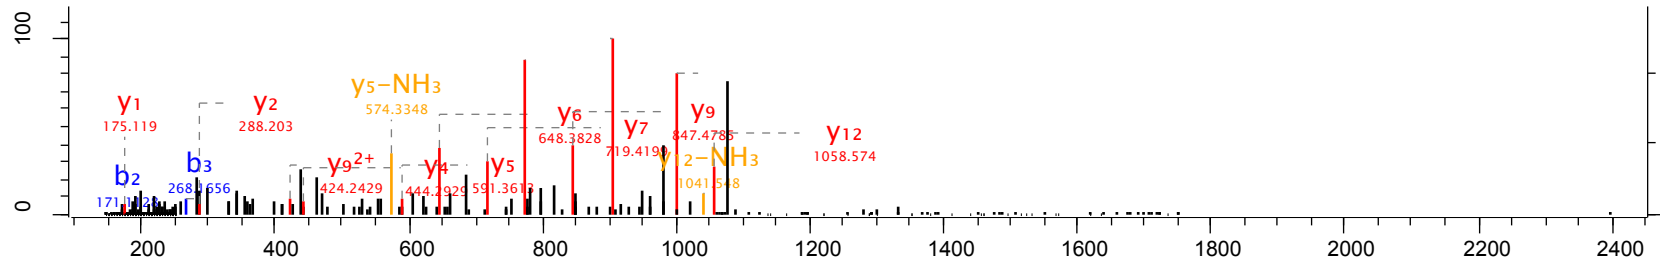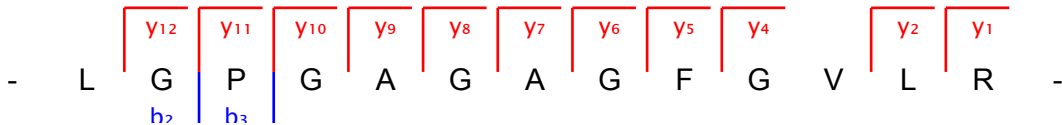

[1e4]

| Raw file                         | Scan  | Method   | Score | m/z    | Gene names |
|----------------------------------|-------|----------|-------|--------|------------|
| 20150226_Hela_Top_opt_A3_01_1591 | 44654 | TOF; CID | 87.43 | 882.45 | CTSS       |

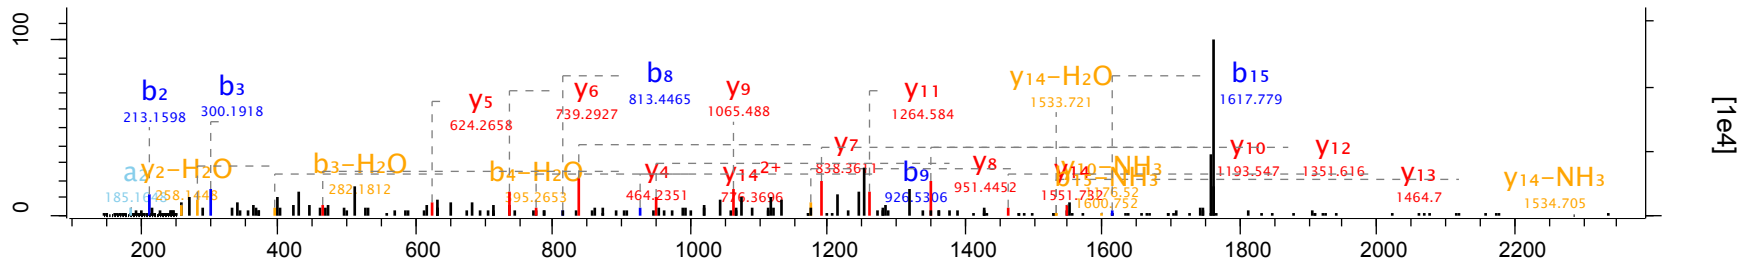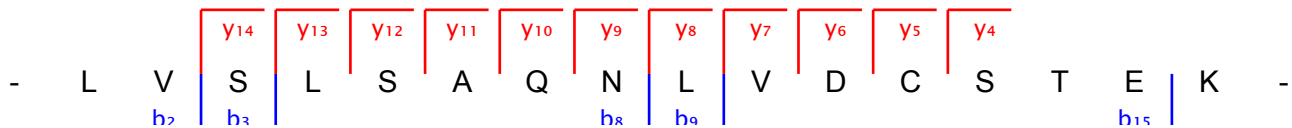

| Raw file                         | Scan  | Method   | Score  | m/z    | Gene names |
|----------------------------------|-------|----------|--------|--------|------------|
| 20150226_Hela_Top_opt_A3_01_1591 | 45851 | TOF; CID | 116.06 | 908.46 | SLC30A7    |

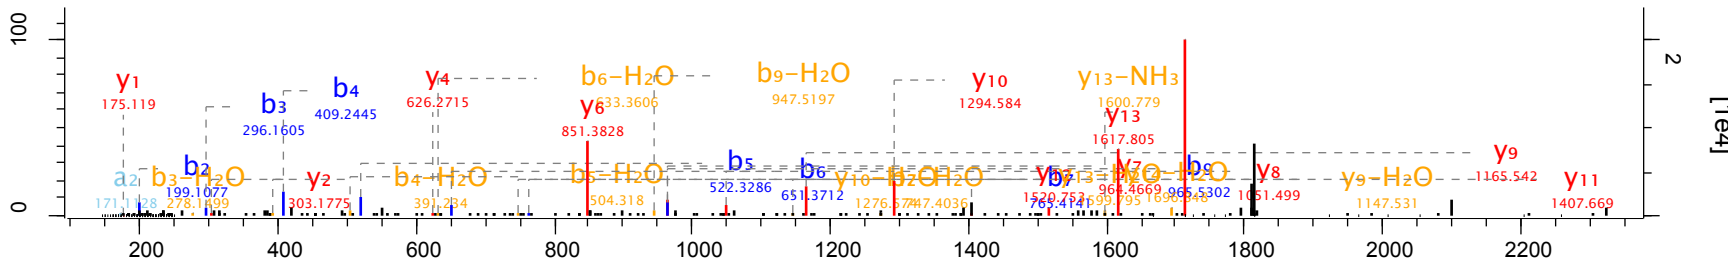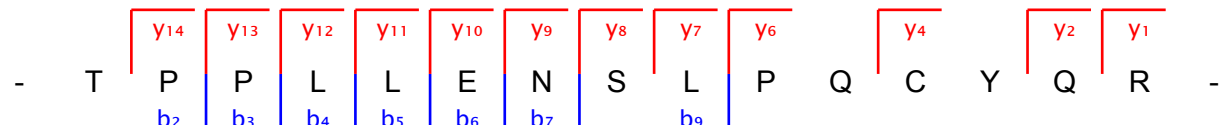

| Raw file                         | Scan  | Method   | Score | m/z    | Gene names |
|----------------------------------|-------|----------|-------|--------|------------|
| 20150226_Hela_Top_opt_A3_01_1591 | 46308 | TOF; CID | 56.57 | 722.41 | C15orf40   |

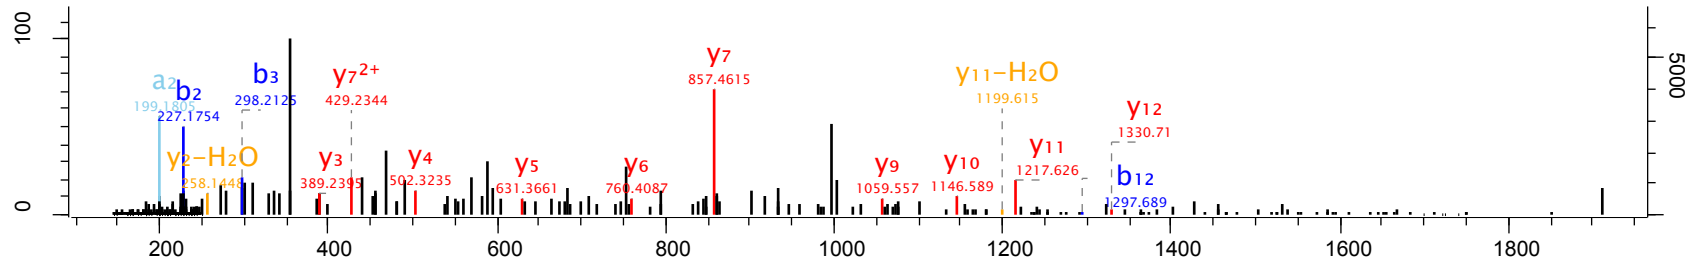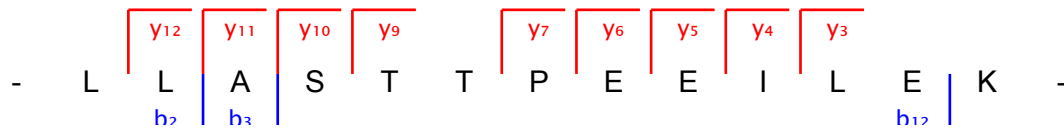

| Raw file                         | Scan  | Method   | Score  | m/z    | Gene names |
|----------------------------------|-------|----------|--------|--------|------------|
| 20150226_Hela_Top_opt_A3_01_1591 | 47650 | TOF; CID | 133.21 | 797.39 | SLC38A2    |

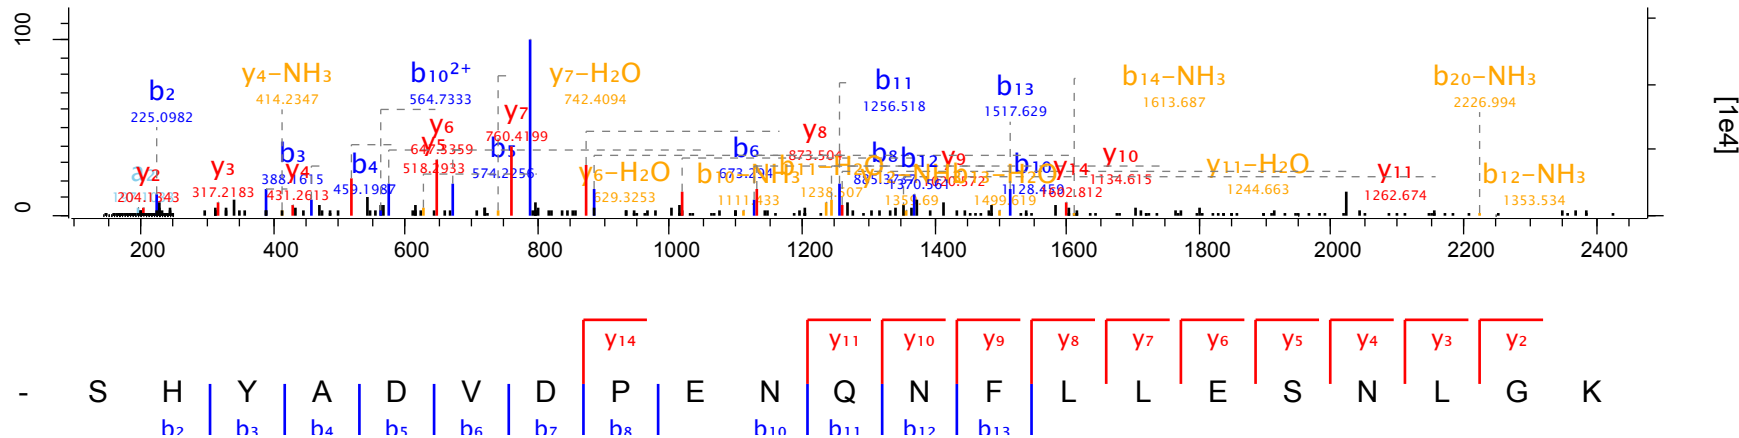

| Raw file                         | Scan  | Method   | Score | m/z    | Gene names |
|----------------------------------|-------|----------|-------|--------|------------|
| 20150226_Hela_Top_opt_A3_01_1591 | 48943 | TOF; CID | 62.63 | 600.82 | C16orf70   |

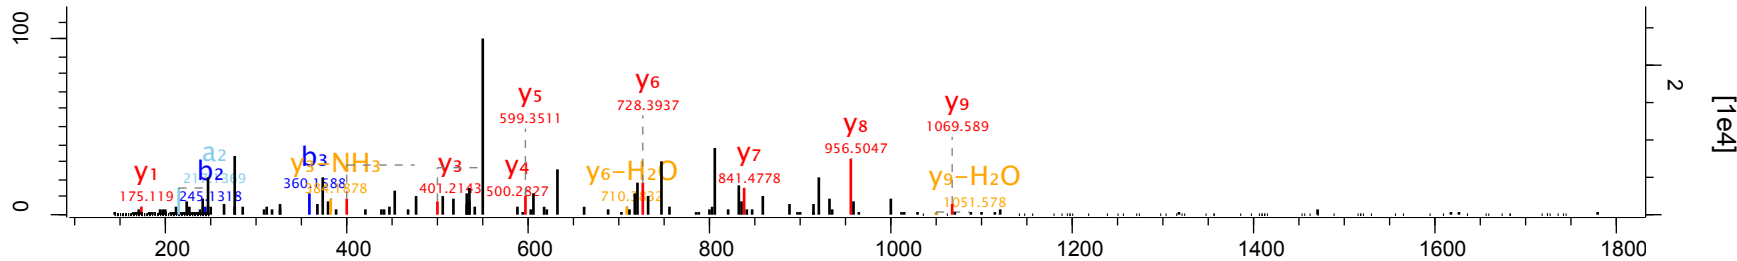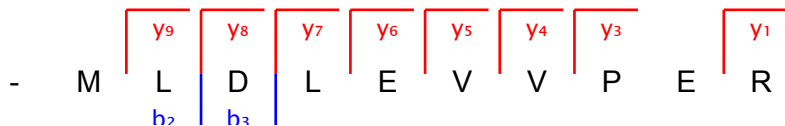

Raw file

20150226\_Hela\_Top\_opt\_A3\_01\_1591

Scan

49082

Method

TOF; CID

Score

105.39

m/z

431.27

Gene names

HS3ST3B1;HS3ST6;ARHGAP40;HS3ST3A1

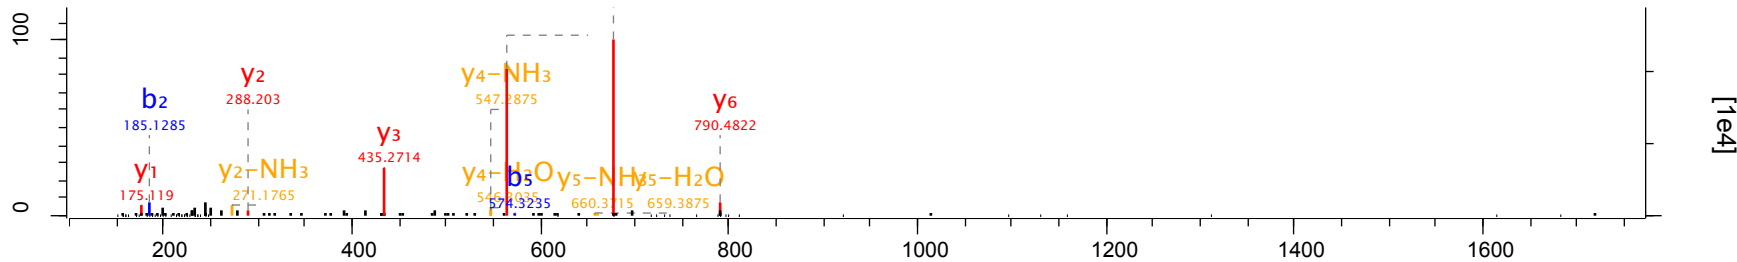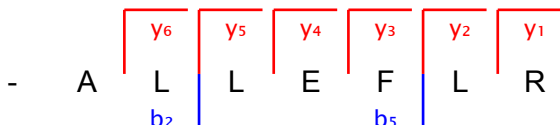



| Raw file                         | Scan  | Method   | Score | m/z    | Gene names |
|----------------------------------|-------|----------|-------|--------|------------|
| 20150226_Hela_Top_opt_A3_01_1591 | 49341 | TOF; CID | 55.75 | 851.96 | SEC14L1    |

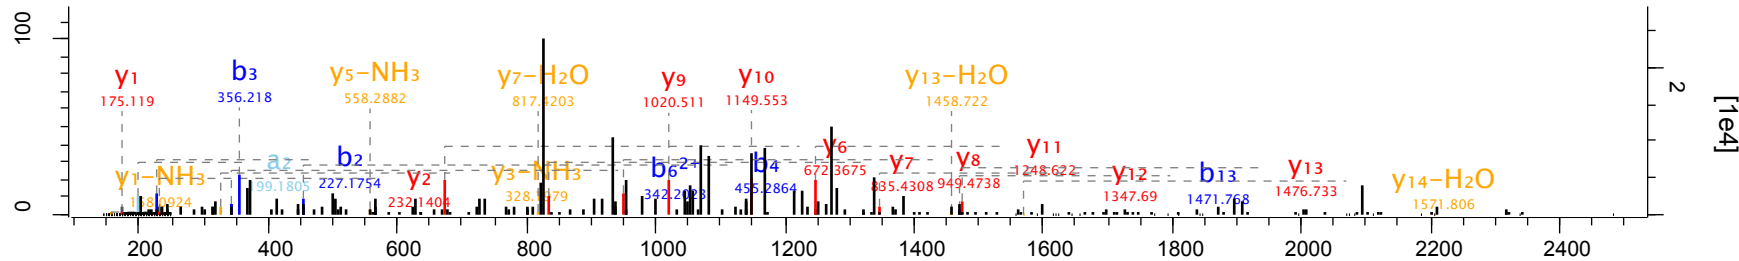

- I I E V V E A N Y P E T L G R -  
 b<sub>2</sub> b<sub>3</sub> b<sub>4</sub> h<sub>6</sub><sup>2+</sup> b<sub>13</sub>

y<sub>13</sub> y<sub>12</sub> y<sub>11</sub> y<sub>10</sub> y<sub>9</sub> y<sub>8</sub> y<sub>7</sub> y<sub>6</sub> y<sub>2</sub> y<sub>1</sub>

| Raw file                         | Scan  | Method   | Score | m/z    | Gene names |
|----------------------------------|-------|----------|-------|--------|------------|
| 20150226_Hela_Top_opt_A3_01_1591 | 49343 | TOF; CID | 39.05 | 901.45 | POGK       |

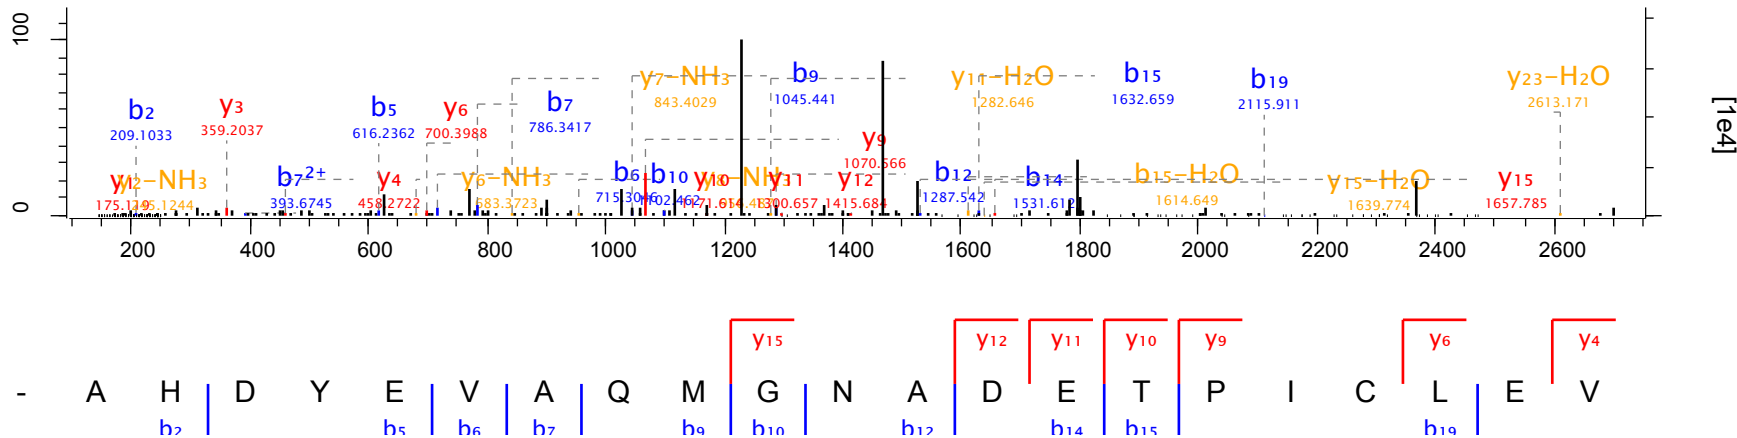

Raw file

20150226\_Hela\_Top\_opt\_A3\_01\_1591

Scan

49516

Method

TOF; CID

Score

88.5

m/z

557.83

Gene names

TRAPPC12

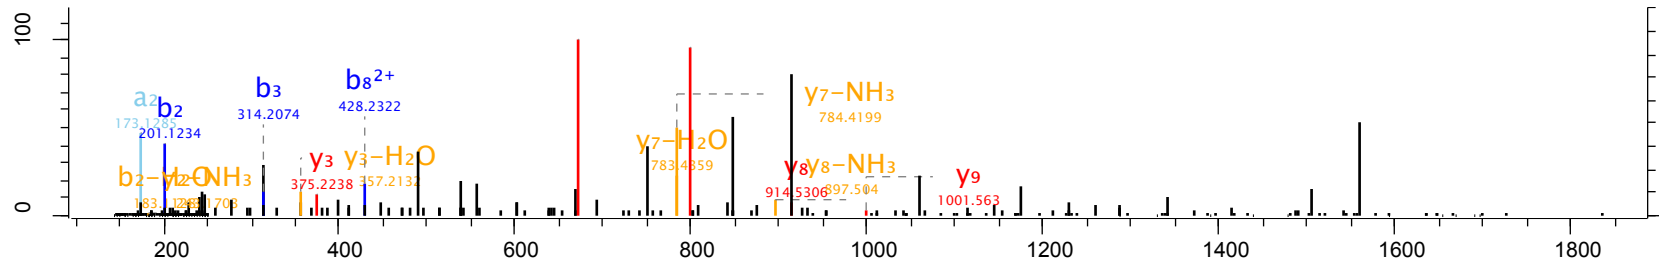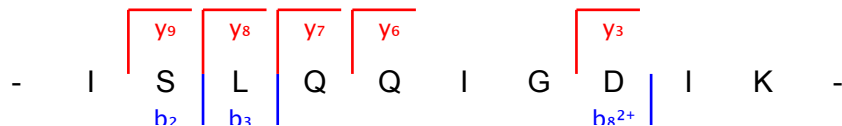

| Raw file                         | Scan  | Method   | Score | m/z    | Gene names |
|----------------------------------|-------|----------|-------|--------|------------|
| 20150226_Hela_Top_opt_A3_01_1591 | 49820 | TOF; CID | 56.4  | 779.45 | HUS1       |

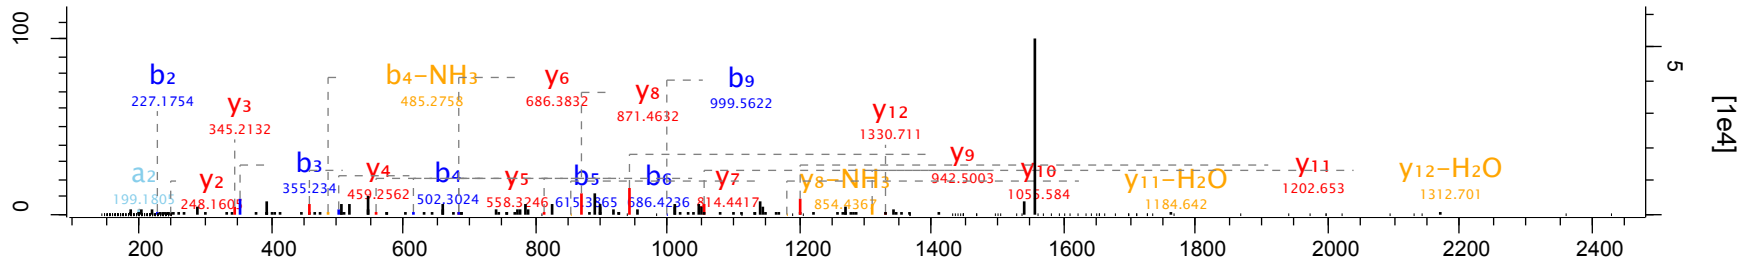

- L L Q F L A G Q Q V N P T K -  
 b<sub>2</sub> b<sub>3</sub> b<sub>4</sub> b<sub>5</sub> b<sub>6</sub> b<sub>9</sub>  
 y<sub>12</sub> y<sub>11</sub> y<sub>10</sub> y<sub>9</sub> y<sub>8</sub> y<sub>7</sub> y<sub>6</sub> y<sub>5</sub> y<sub>4</sub> y<sub>3</sub> y<sub>2</sub>

| Raw file                         | Scan  | Method   | Score | m/z    | Gene names |
|----------------------------------|-------|----------|-------|--------|------------|
| 20150226_Hela_Top_opt_A3_01_1591 | 49860 | TOF; CID | 84.48 | 576.85 | MAL2       |

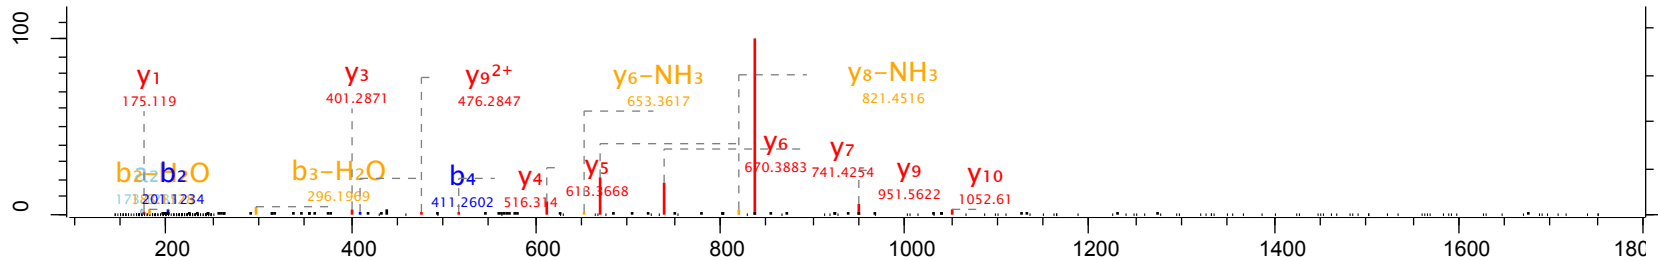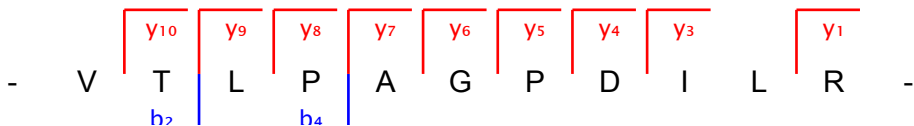

Raw file

20150226\_Hela\_Top\_opt\_A3\_01\_1591

Scan

49880

Method

TOF; CID

Score

105.39

m/z

659.36

Gene names

CASC4

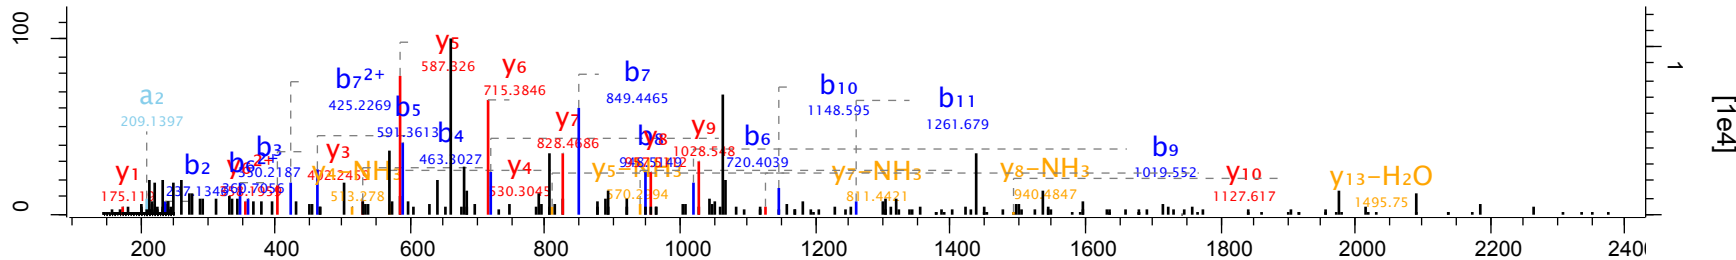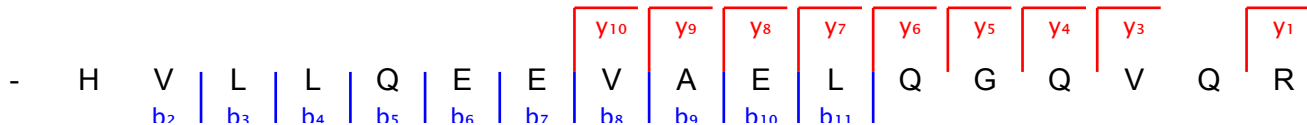

Raw file

20150226\_Hela\_Top\_opt\_A3\_01\_1591

Scan

49943

Method

TOF; CID

Score

76.68

m/z

496.76

Gene names

SEPT3

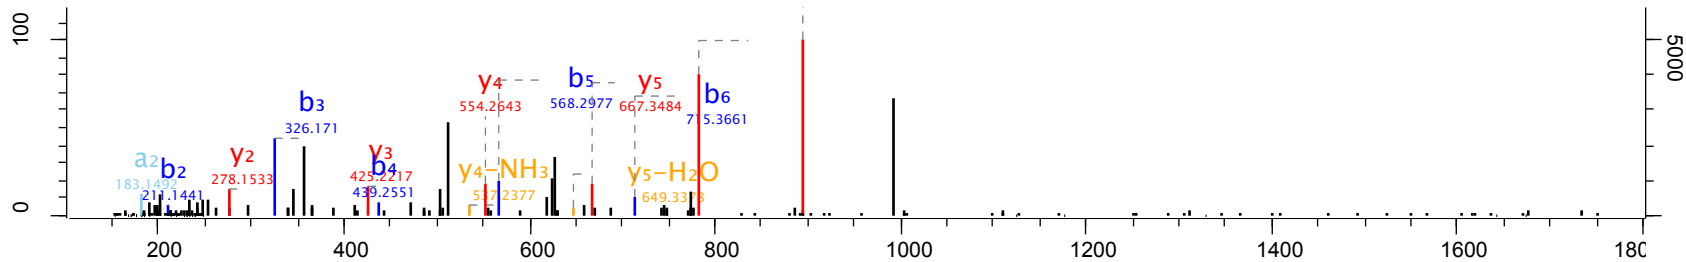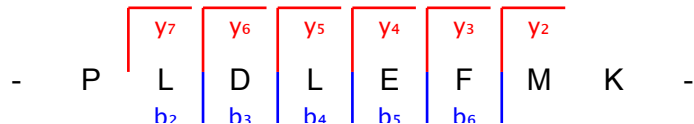

| Raw file                         | Scan  | Method   | Score | m/z    | Gene names |
|----------------------------------|-------|----------|-------|--------|------------|
| 20150226_Hela_Top_opt_A3_01_1591 | 50128 | TOF; CID | 61.48 | 630.36 | CT83       |

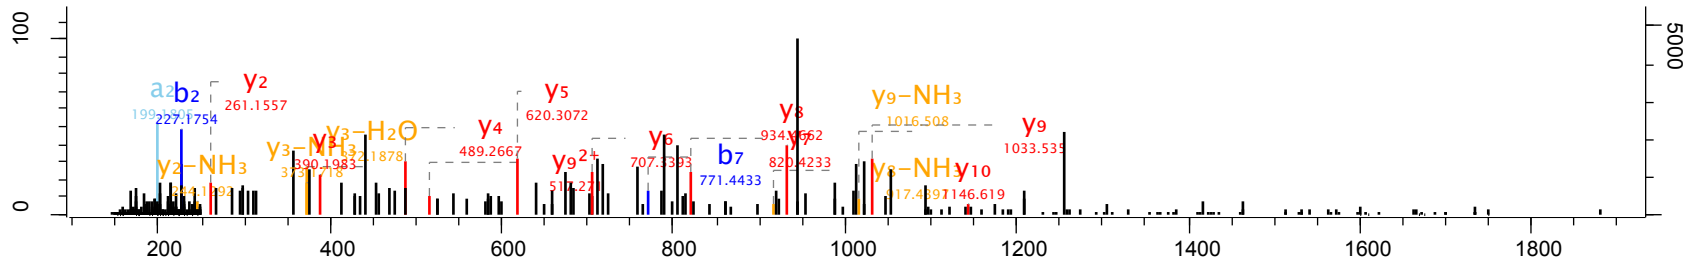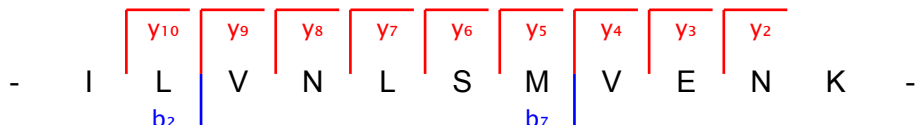



| Raw file                         | Scan  | Method   | Score | m/z    | Gene names |
|----------------------------------|-------|----------|-------|--------|------------|
| 20150226_Hela_Top_opt_A3_01_1591 | 50897 | TOF; CID | 55.3  | 846.48 | KLF5       |

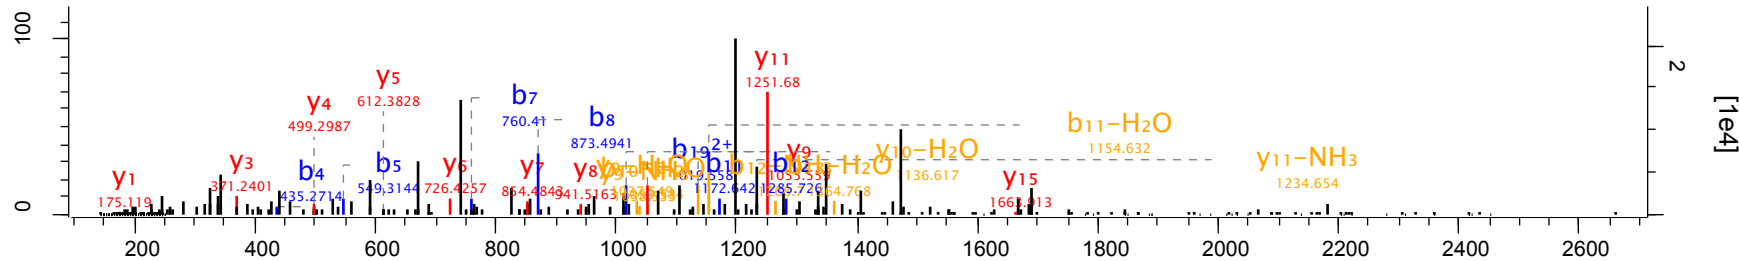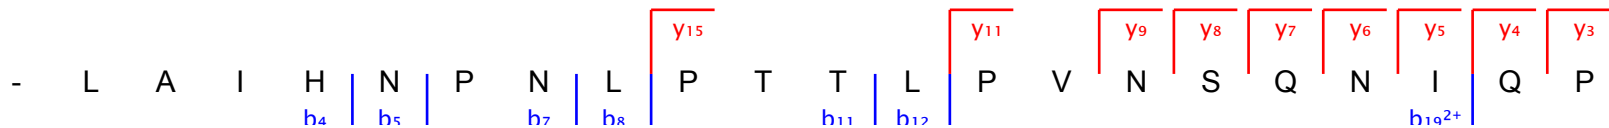

| Raw file                         | Scan  | Method   | Score | m/z    | Gene names |
|----------------------------------|-------|----------|-------|--------|------------|
| 20150226_Hela_Top_opt_A3_01_1591 | 51226 | TOF; CID | 65.84 | 687.86 | VTI1A      |

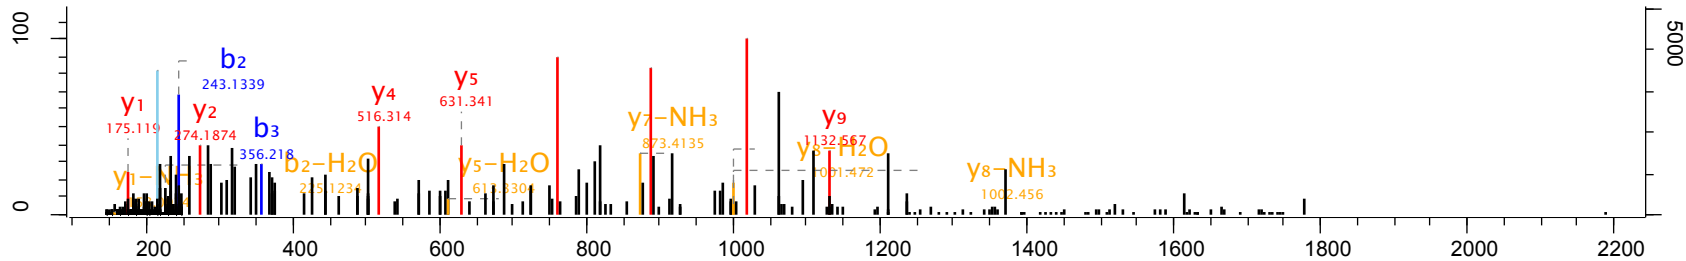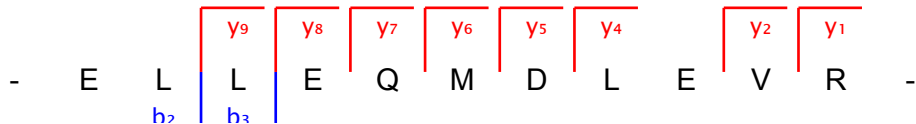

| Raw file                         | Scan  | Method   | Score | m/z    | Gene names |
|----------------------------------|-------|----------|-------|--------|------------|
| 20150226_Hela_Top_opt_A3_01_1591 | 51422 | TOF; CID | 43.91 | 948.45 | ABCB1      |

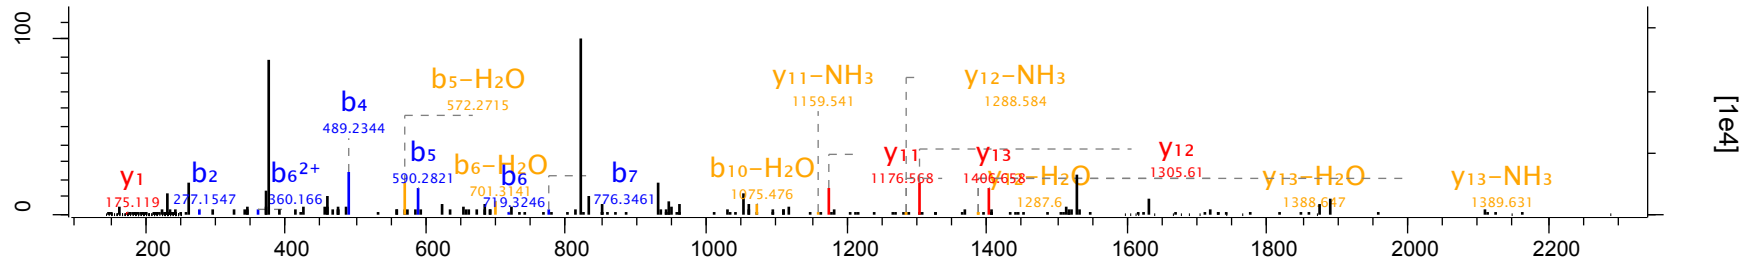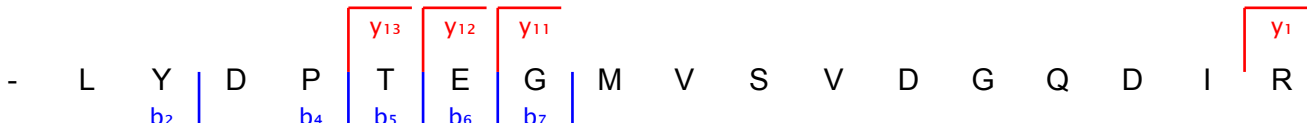

| Raw file                         | Scan  | Method   | Score  | m/z    | Gene names |
|----------------------------------|-------|----------|--------|--------|------------|
| 20150226_Hela_Top_opt_A3_01_1591 | 51557 | TOF; CID | 110.81 | 499.28 | ITGA6      |

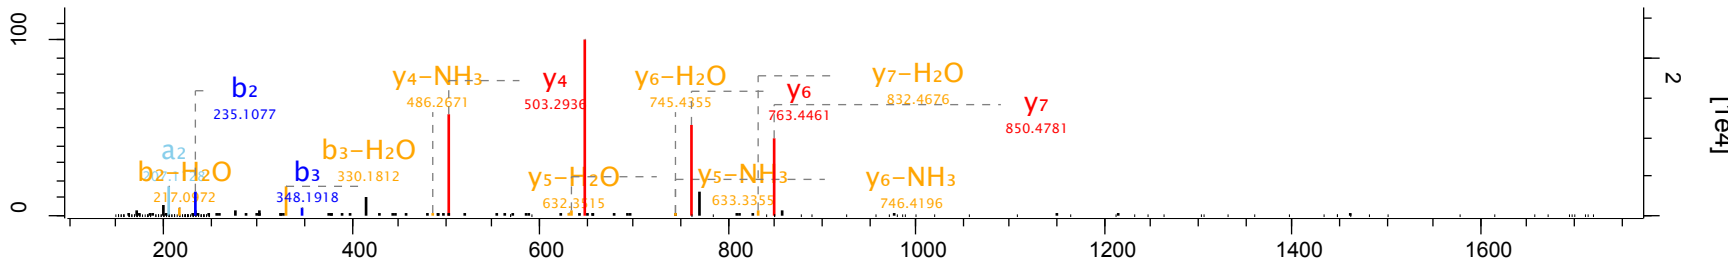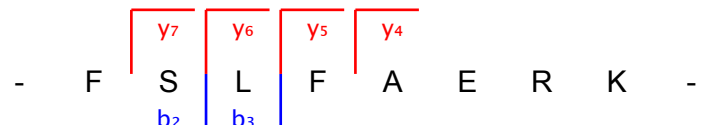

| Raw file                         | Scan  | Method   | Score | m/z    | Gene names |
|----------------------------------|-------|----------|-------|--------|------------|
| 20150226_Hela_Top_opt_A3_01_1591 | 54321 | TOF; CID | 78.32 | 699.36 | DPP7       |

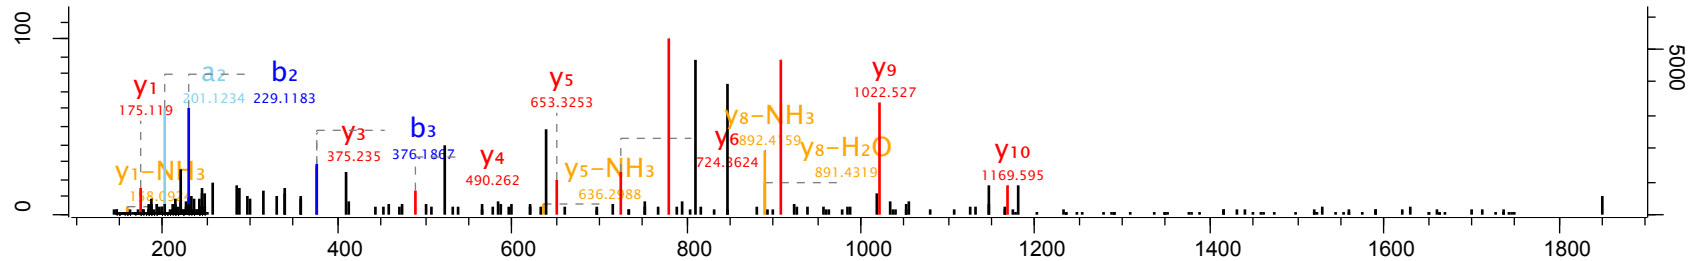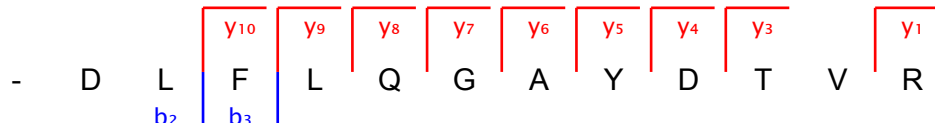

| Raw file                         | Scan  | Method   | Score | m/z    | Gene names |
|----------------------------------|-------|----------|-------|--------|------------|
| 20150226_Hela_Top_opt_A3_01_1591 | 55072 | TOF; CID | 74.65 | 743.94 | C20orf27   |

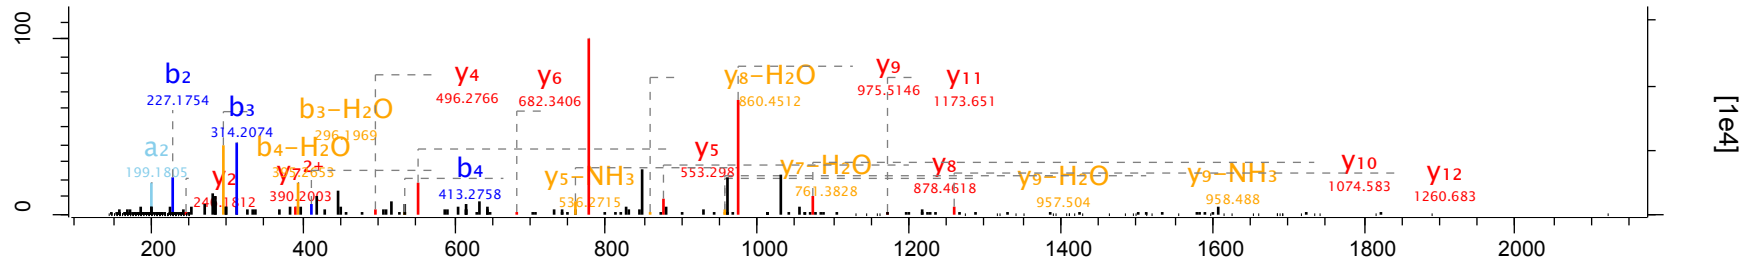

- L L S V V P V P E G Y S V K -  
 b<sub>2</sub> b<sub>3</sub> b<sub>4</sub> y<sub>12</sub> y<sub>11</sub> y<sub>10</sub> y<sub>9</sub> y<sub>8</sub> y<sub>7</sub> y<sub>6</sub> y<sub>5</sub> y<sub>4</sub> y<sub>2</sub>

| Raw file                         | Scan  | Method   | Score  | m/z    | Gene names |
|----------------------------------|-------|----------|--------|--------|------------|
| 20150226_Hela_Top_opt_A3_01_1591 | 55094 | TOF; CID | 135.09 | 928.95 | MAPK1IP1L  |

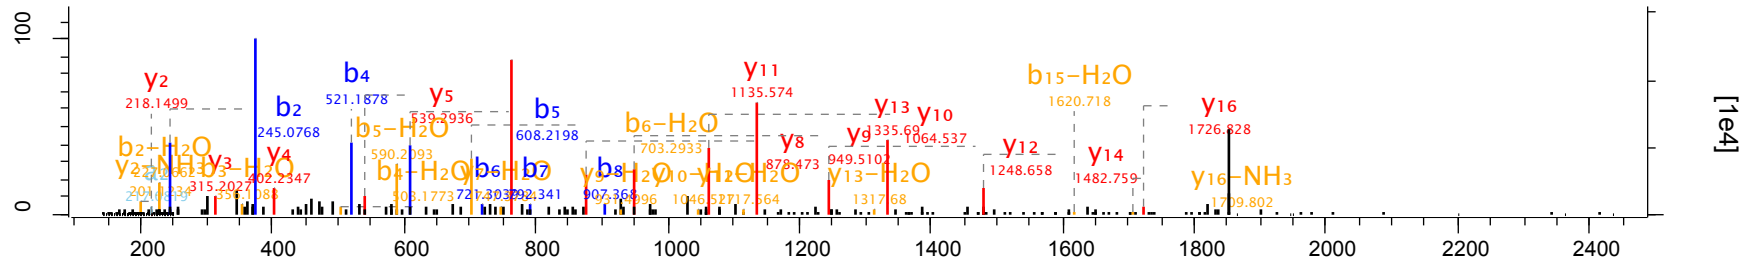

ac

- S D E F S L A D A L P E H S P A K -

b<sub>2</sub> | b<sub>3</sub> | b<sub>4</sub> | b<sub>5</sub> | b<sub>6</sub> | b<sub>7</sub> | b<sub>8</sub>

y<sub>16</sub> | y<sub>14</sub> | y<sub>13</sub> | y<sub>12</sub> | y<sub>11</sub> | y<sub>10</sub> | y<sub>9</sub> | y<sub>8</sub> | y<sub>7</sub> | y<sub>5</sub> | y<sub>4</sub> | y<sub>3</sub> | y<sub>2</sub>

| Raw file                         | Scan  | Method   | Score | m/z   | Gene names |
|----------------------------------|-------|----------|-------|-------|------------|
| 20150226_Hela_Top_opt_A3_01_1591 | 55101 | TOF; CID | 63.22 | 503.8 | OARD1      |

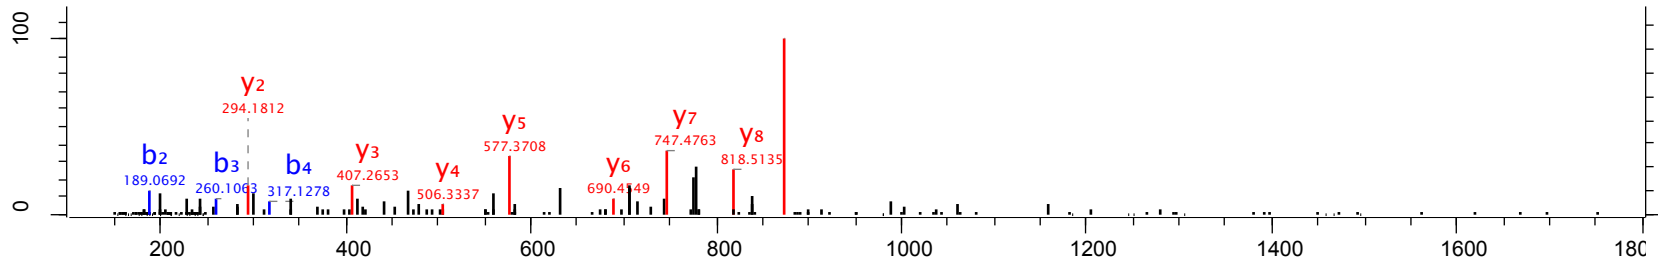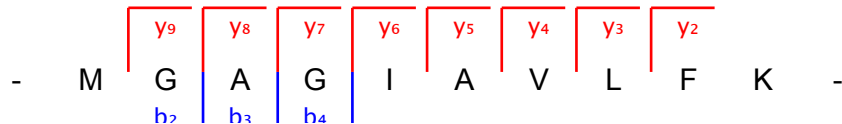



Raw file

20150226\_Hela\_Top\_opt\_A3\_01\_1591

Scan

56668

Method

TOF; CID

Score

70.09

m/z

703.89

Gene names

ISCA2

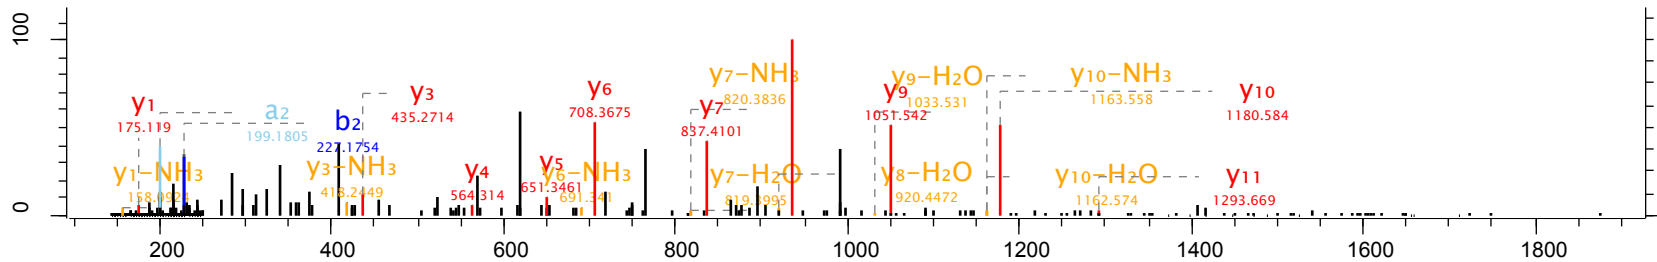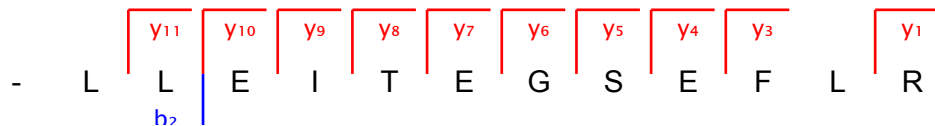

Raw file

20150226\_Hela\_Top\_opt\_A3\_01\_1591

Scan

57582

Method

TOF; CID

Score

104.84

m/z

937.51

Gene names

ZFP36L2

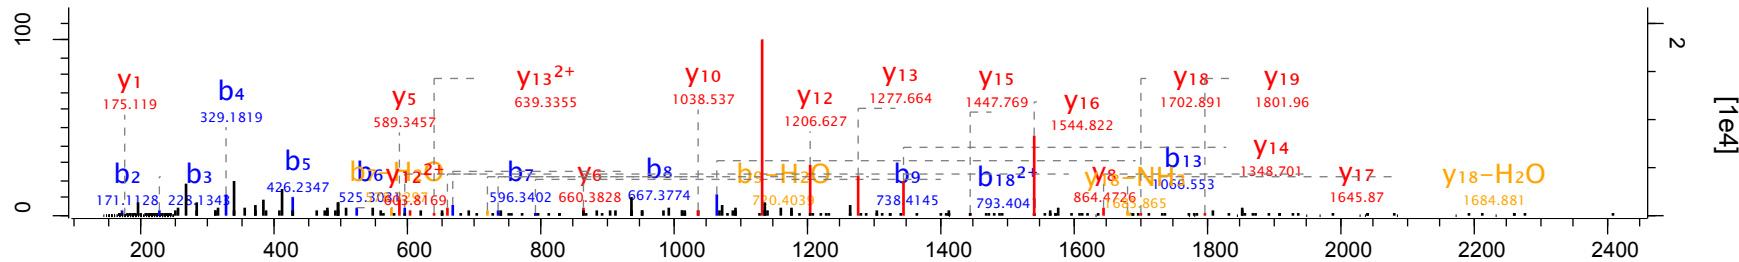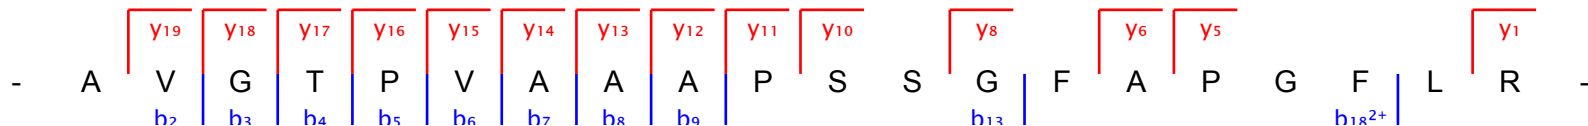

Raw file

20150226\_Hela\_Top\_opt\_A3\_01\_1591

Scan

57585

Method

TOF; CID

Score

58.48

m/z

802.07

Gene names

MTHFSD

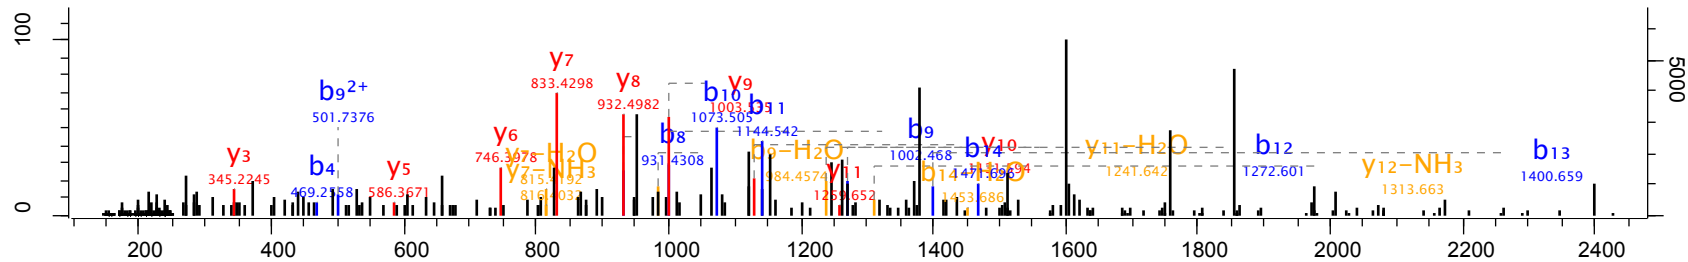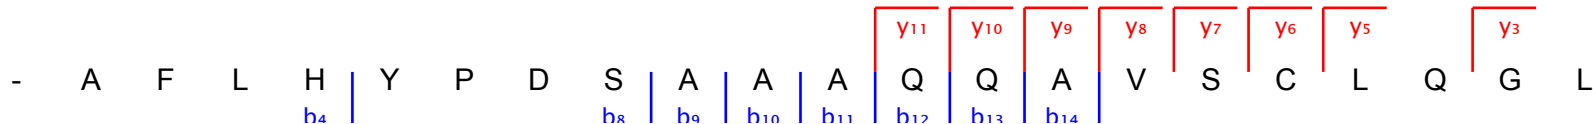

Raw file

20150226\_Hela\_Top\_opt\_A3\_01\_1591

Scan

58106

Method

TOF; CID

Score

118.37

m/z

1294.6

Gene names

MRPL42

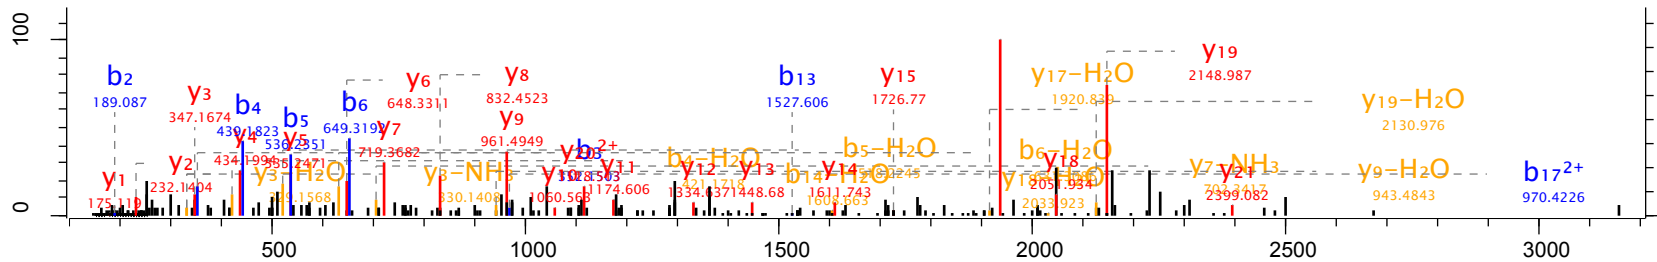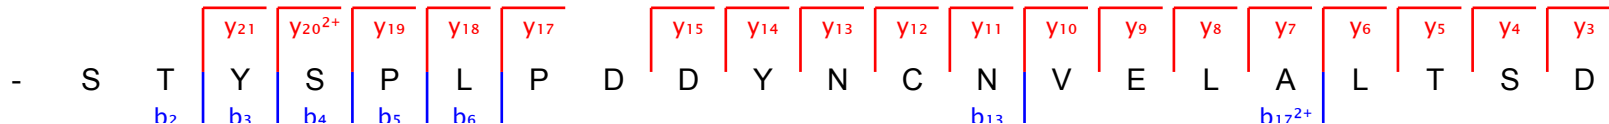

| Raw file                         | Scan  | Method   | Score | m/z    | Gene names |
|----------------------------------|-------|----------|-------|--------|------------|
| 20150226_Hela_Top_opt_A3_01_1591 | 58828 | TOF; CID | 78.26 | 501.31 | VRK3       |

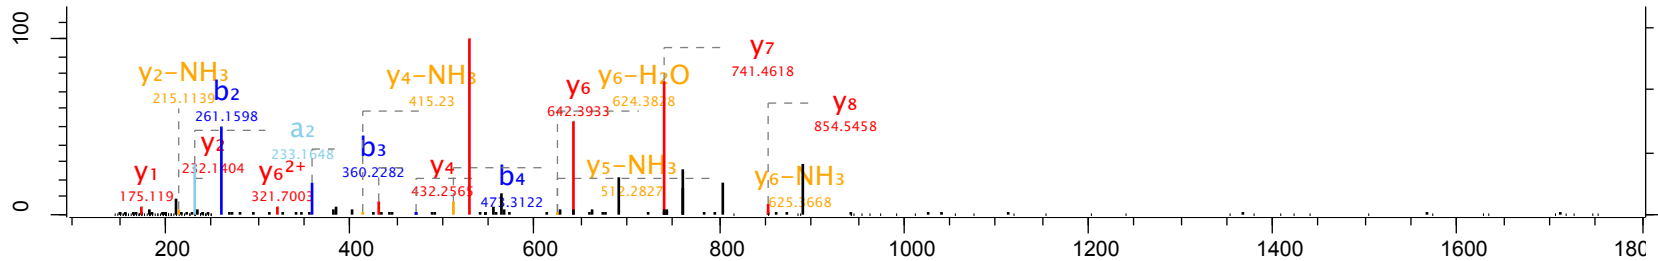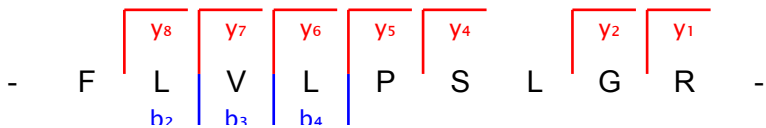

[1e4]

| Raw file                         | Scan  | Method   | Score  | m/z    | Gene names |
|----------------------------------|-------|----------|--------|--------|------------|
| 20150226_Hela_Top_opt_A3_01_1591 | 58835 | TOF; CID | 119.57 | 464.81 | B4GALT5    |

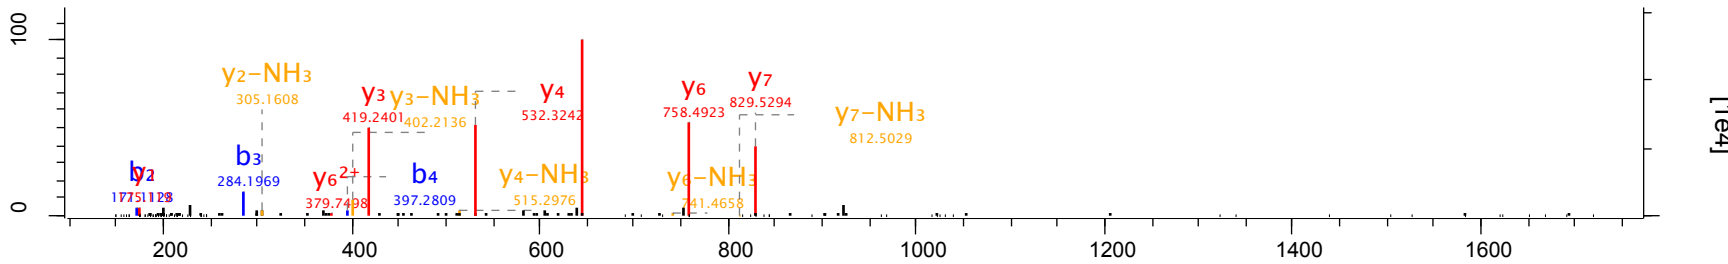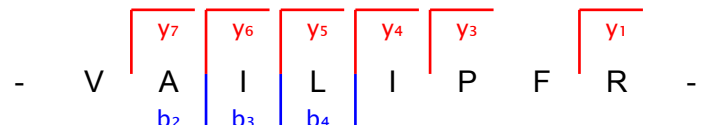

| Raw file                         | Scan  | Method   | Score | m/z    | Gene names |
|----------------------------------|-------|----------|-------|--------|------------|
| 20150226_Hela_Top_opt_A3_01_1591 | 59090 | TOF; CID | 87.67 | 577.35 | TMEM65     |

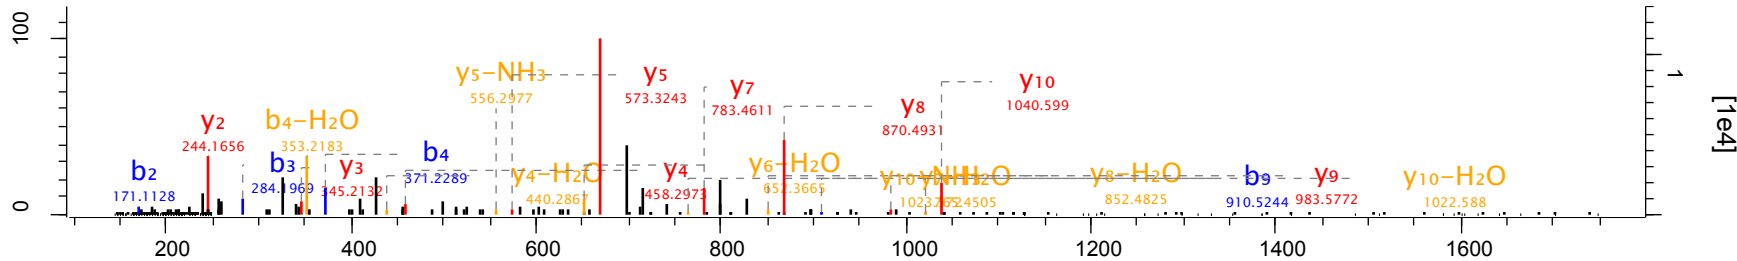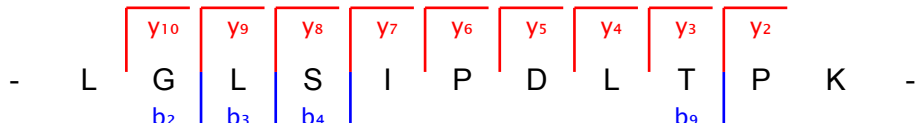

| Raw file                         | Scan  | Method   | Score | m/z    | Gene names |
|----------------------------------|-------|----------|-------|--------|------------|
| 20150226_Hela_Top_opt_A3_01_1591 | 59172 | TOF; CID | 51.57 | 652.86 | HSD17B12   |

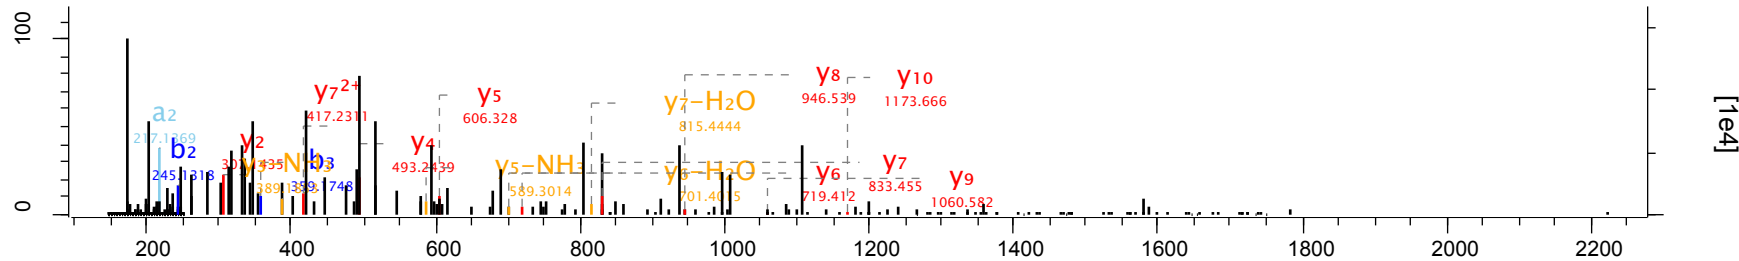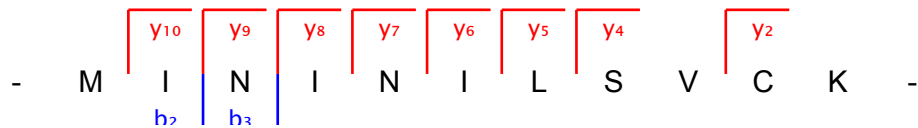



Raw file

20150226\_Hela\_Top\_opt\_A3\_01\_1591

Scan

59348

Method

TOF; CID

Score

91.82

m/z

1138.57

Gene names

FAM195A

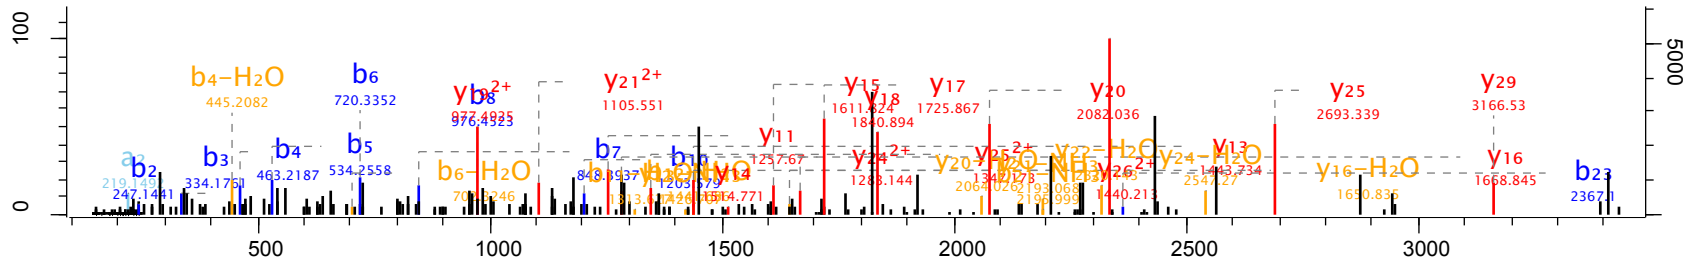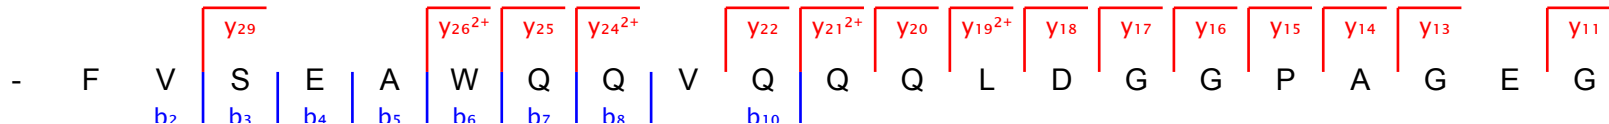

Raw file

20150226\_Hela\_Top\_opt\_A3\_01\_1591

Scan

59665

Method

TOF; CID

Score

38.59

m/z

935.17

Gene names

C1orf85

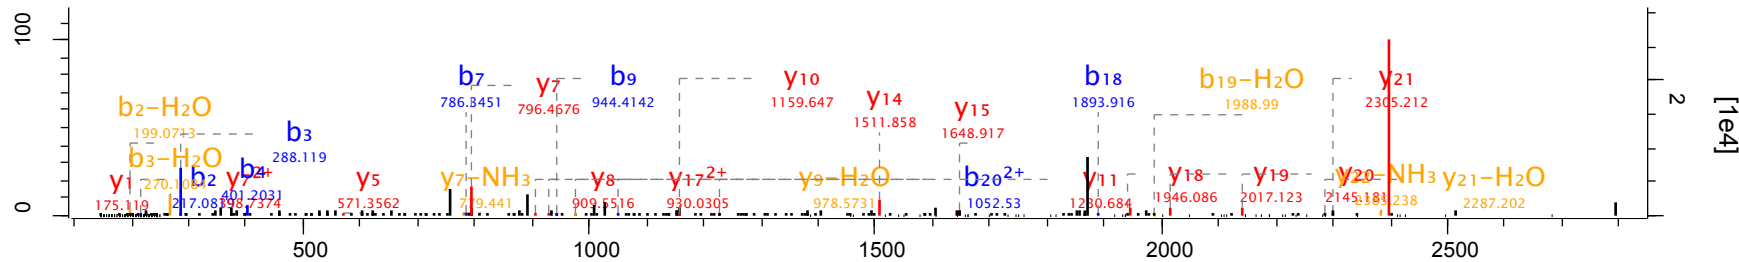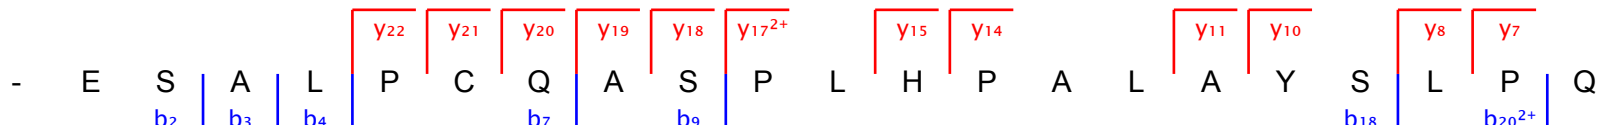

| Raw file                         | Scan  | Method   | Score | m/z    | Gene names |
|----------------------------------|-------|----------|-------|--------|------------|
| 20150226_Hela_Top_opt_A3_01_1591 | 60044 | TOF; CID | 77.29 | 634.88 | CEPT1      |

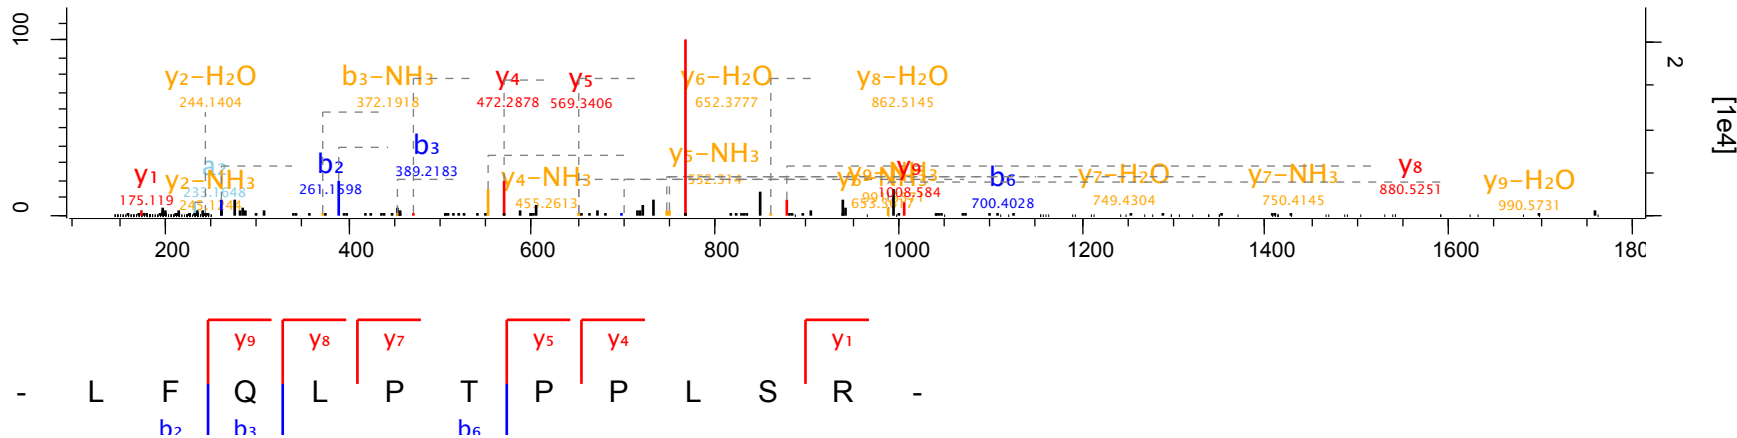

Raw file

Scan

Method

Score

m/z

Gene names

20150226\_Hela\_Top\_opt\_A3\_01\_1591

60104

TOF; CID

98.59

539.29

ZCCHC6

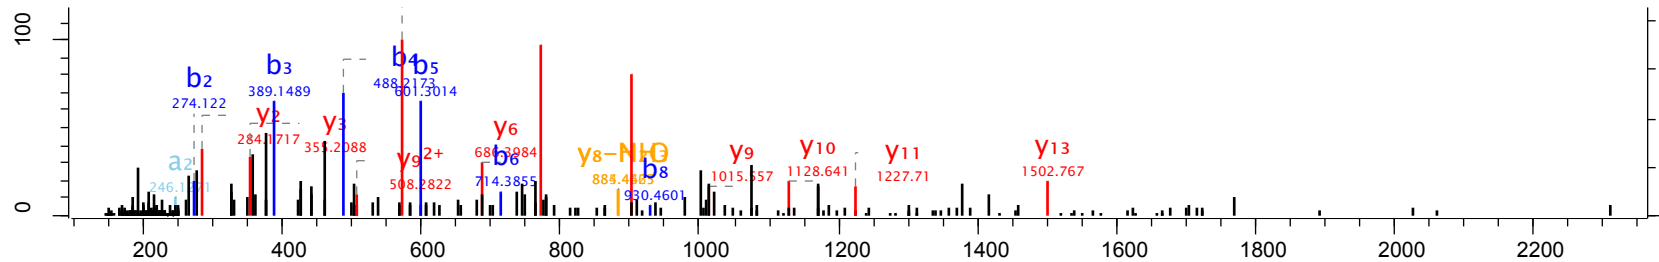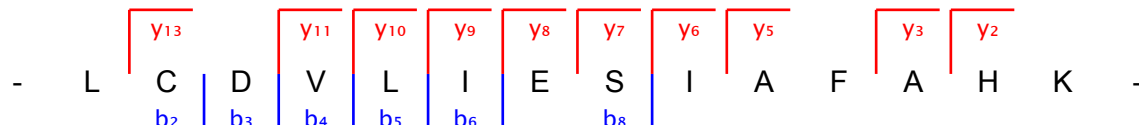

Raw file

20150226\_Hela\_Top\_opt\_A3\_01\_1591

Scan

60243

Method

TOF; CID

Score

76.9

m/z

1126.19

Gene names

DERL2

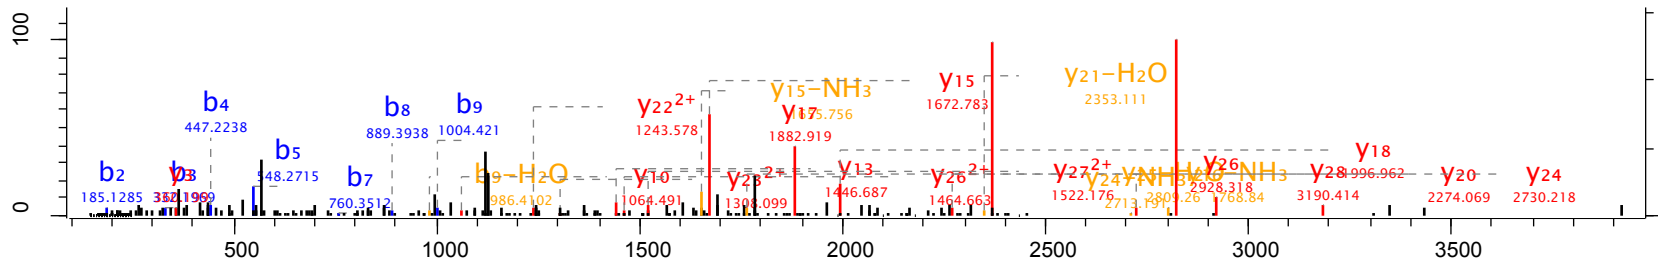

[1e4]

- A I F D T P D E D P N Y N P L P E E R P G

b<sub>2</sub> b<sub>3</sub> b<sub>4</sub> b<sub>5</sub> b<sub>7</sub> b<sub>8</sub> b<sub>9</sub> y<sub>28</sub> y<sub>27</sub><sup>2+</sup> y<sub>26</sub> y<sub>25</sub> y<sub>24</sub> y<sub>23</sub><sup>2+</sup> y<sub>22</sub><sup>2+</sup> y<sub>21</sub> y<sub>20</sub> y<sub>18</sub> y<sub>17</sub> y<sub>15</sub> y<sub>13</sub> y<sub>10</sub>

| Raw file                         | Scan  | Method   | Score | m/z    | Gene names |
|----------------------------------|-------|----------|-------|--------|------------|
| 20150226_Hela_Top_opt_A3_01_1591 | 61175 | TOF; CID | 87.48 | 527.83 | SLC29A1    |

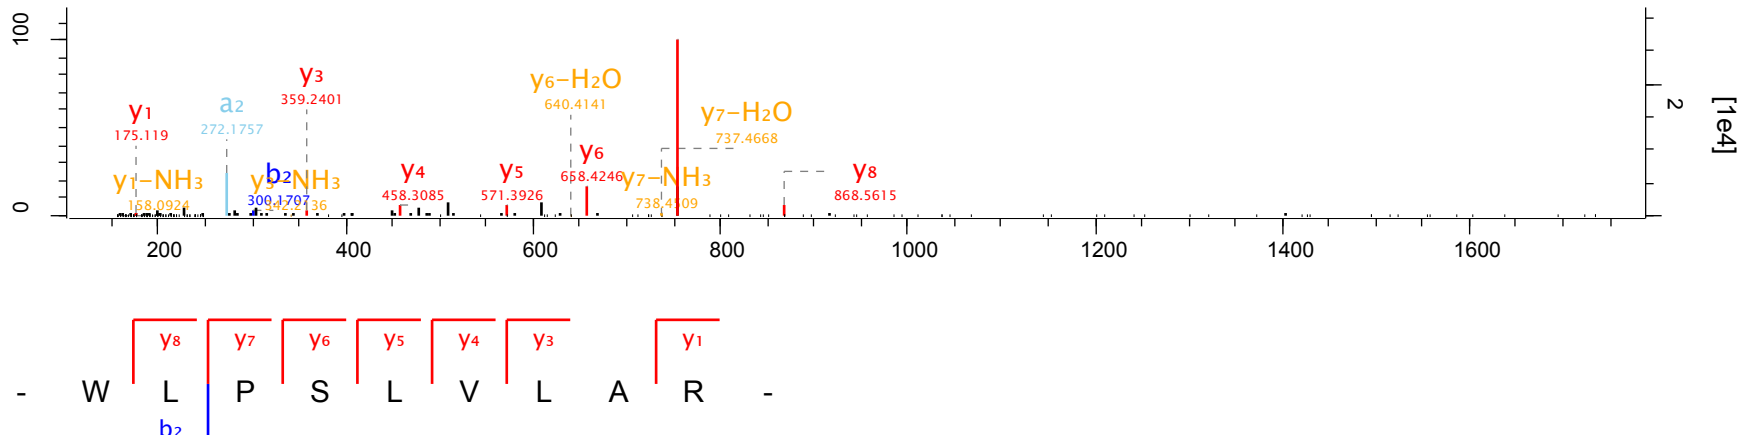

Raw file

20150226\_Hela\_Top\_opt\_A3\_01\_1591

Scan

64049

Method

TOF; CID

Score

57.35

m/z

860.42

Gene names

SWI5

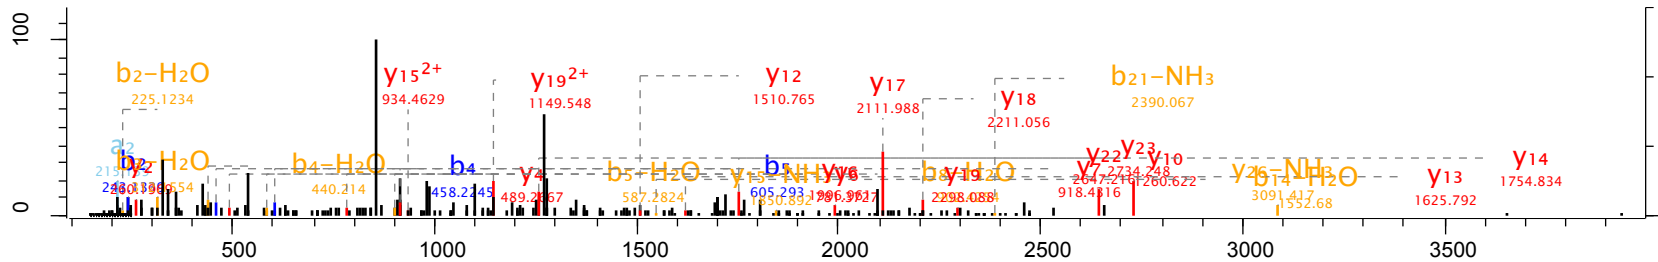

[1e4]

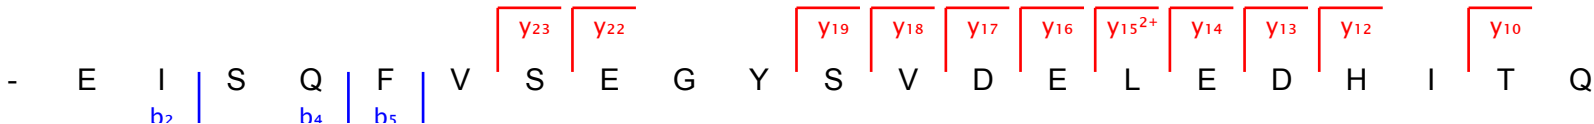

Raw file

20150226\_Hela\_Top\_opt\_A3\_01\_1591

Scan

64207

Method

TOF; CID

Score

87.72

m/z

989.53

Gene names

AES

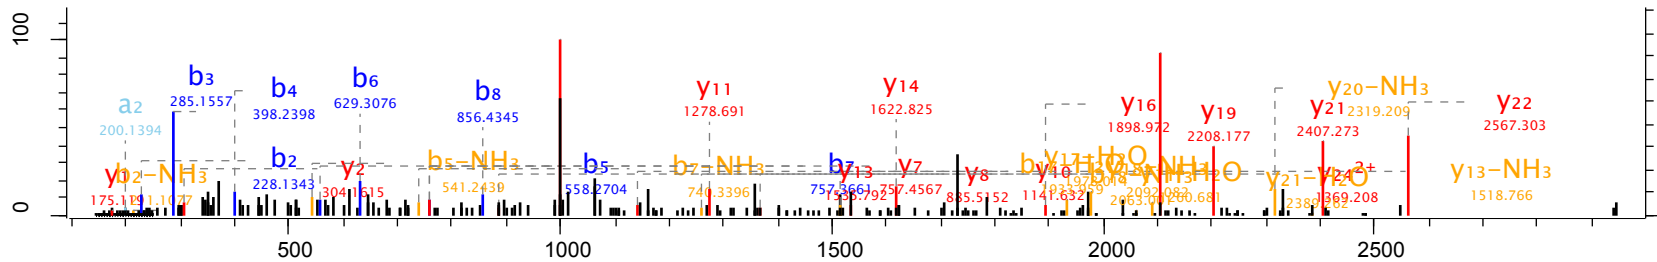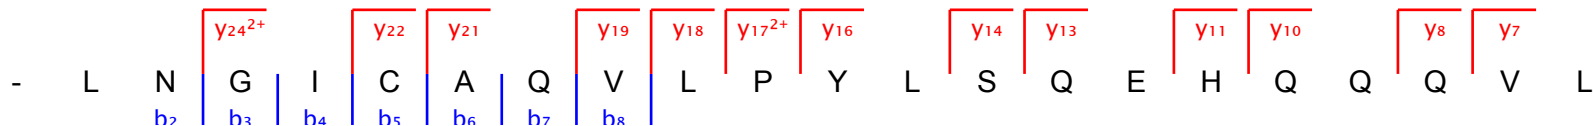



| Raw file                         | Scan  | Method   | Score | m/z     | Gene names |
|----------------------------------|-------|----------|-------|---------|------------|
| 20150226_Hela_Top_opt_A3_01_1591 | 64248 | TOF; CID | 65.8  | 1100.54 | MAPK9      |

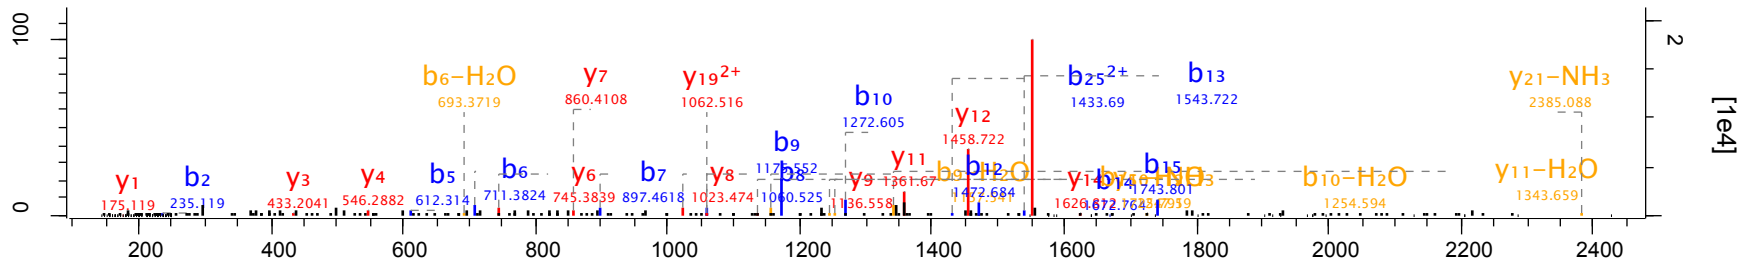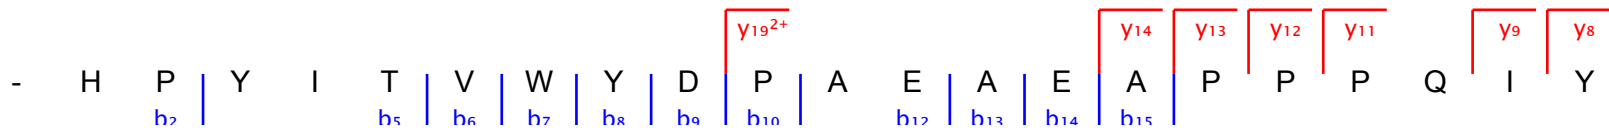

Raw file

20150226\_Hela\_Top\_opt\_A3\_01\_1591

Scan

64961

Method

TOF; CID

Score

61.11

m/z

758.42

Gene names

RILPL1

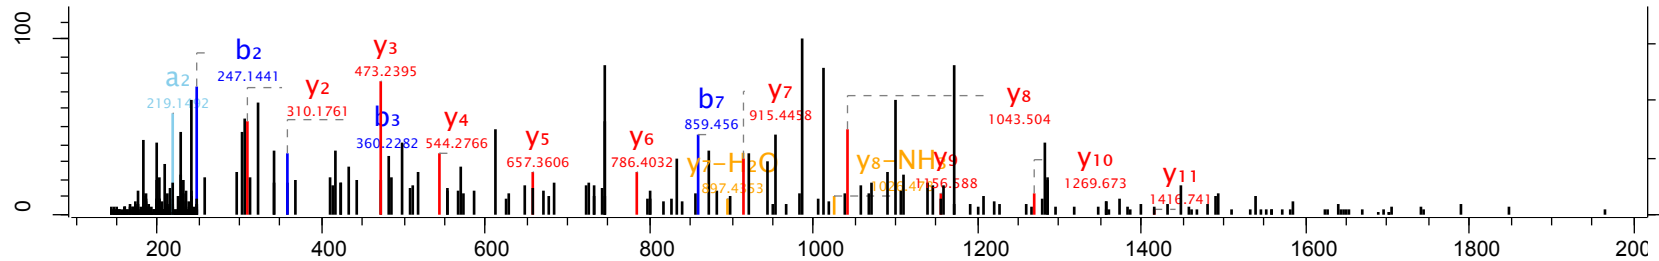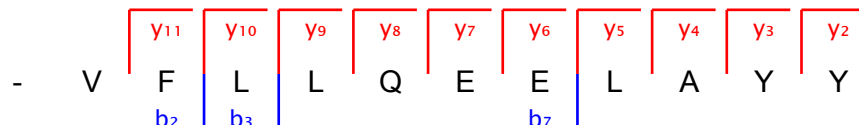

| Raw file                         | Scan  | Method   | Score | m/z    | Gene names |
|----------------------------------|-------|----------|-------|--------|------------|
| 20150226_Hela_Top_opt_A3_01_1591 | 65069 | TOF; CID | 50.3  | 861.46 | FAM188A    |

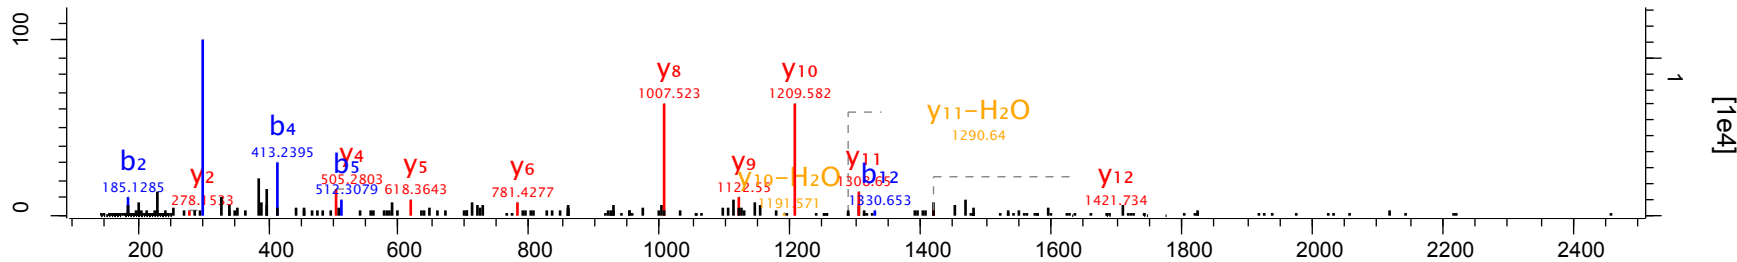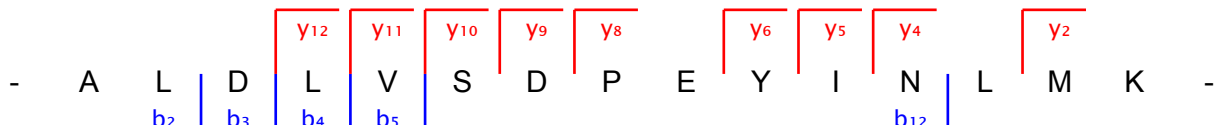

| Raw file                         | Scan  | Method   | Score | m/z    | Gene names |
|----------------------------------|-------|----------|-------|--------|------------|
| 20150226_Hela_Top_opt_A3_01_1591 | 65129 | TOF; CID | 70.26 | 818.43 | ZC3H7B     |

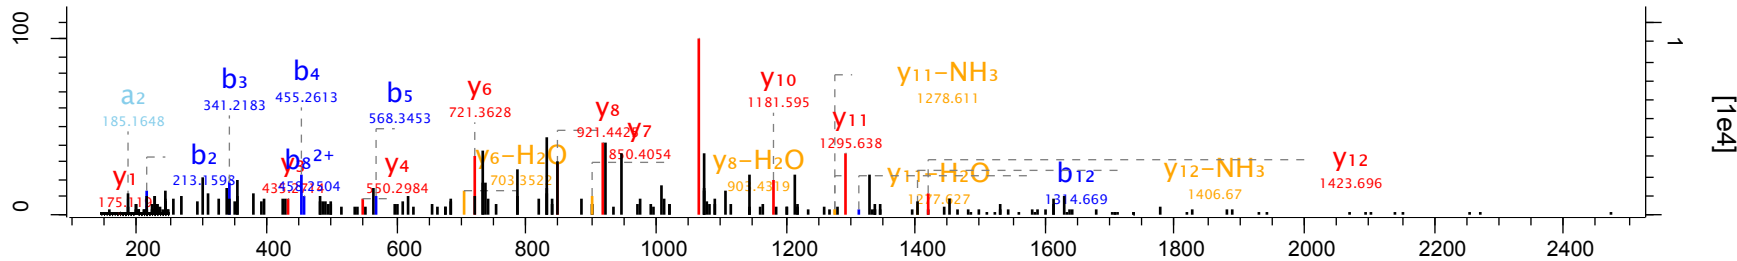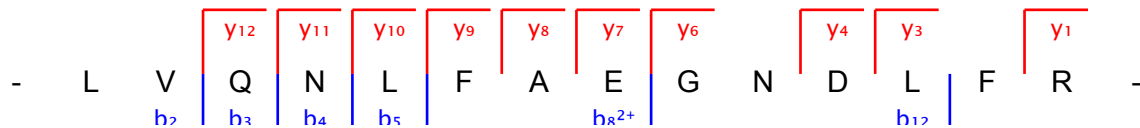

| Raw file                         | Scan  | Method   | Score | m/z    | Gene names |
|----------------------------------|-------|----------|-------|--------|------------|
| 20150226_Hela_Top_opt_A3_01_1591 | 65247 | TOF; CID | 66.06 | 615.83 | SNAP29     |

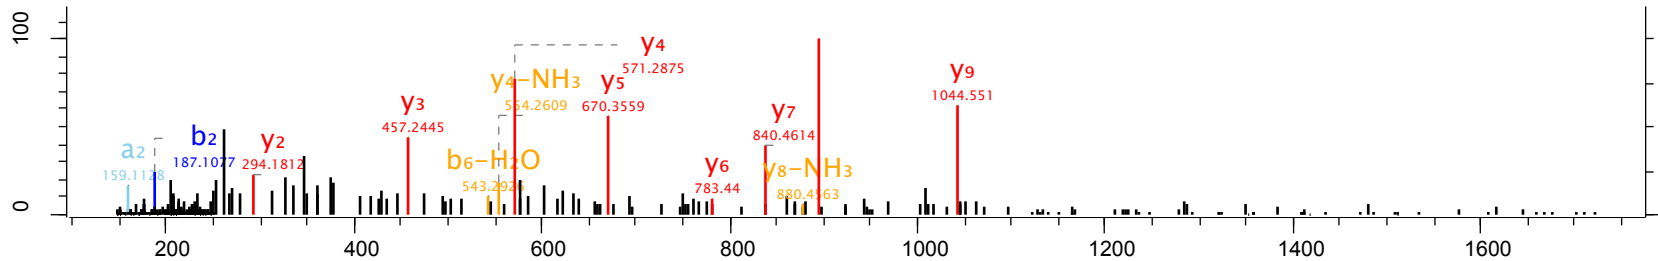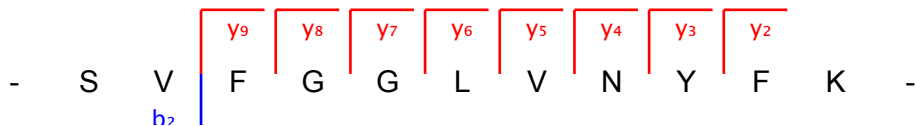

Raw file

20150226\_Hela\_Top\_opt\_A3\_01\_1591

Scan

65587

Method

TOF; CID

Score

65.41

m/z

664.34

Gene names

TRAPPC6A

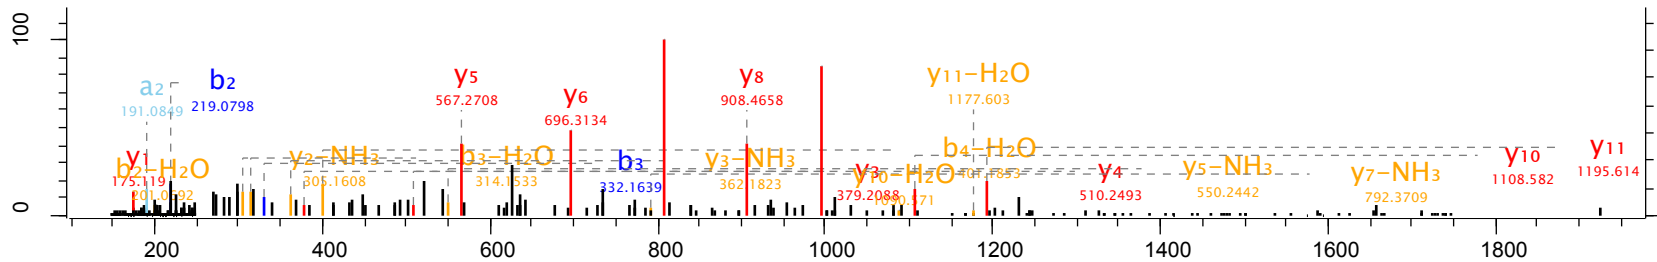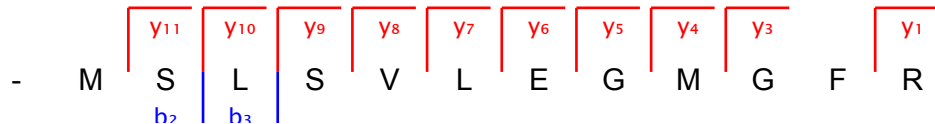

Raw file

20150226\_Hela\_Top\_opt\_A3\_01\_1591

Scan

65669

Method

TOF; CID

Score

72.43

m/z

952.47

Gene names

ZFYVE21

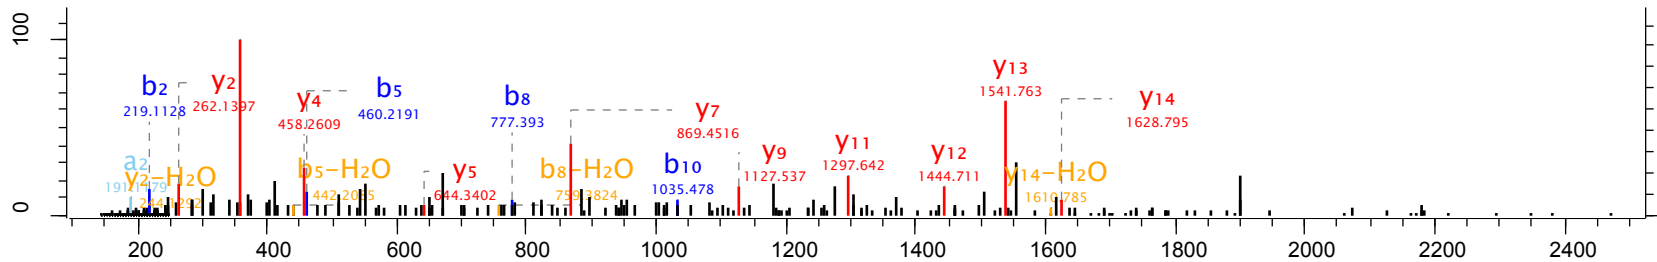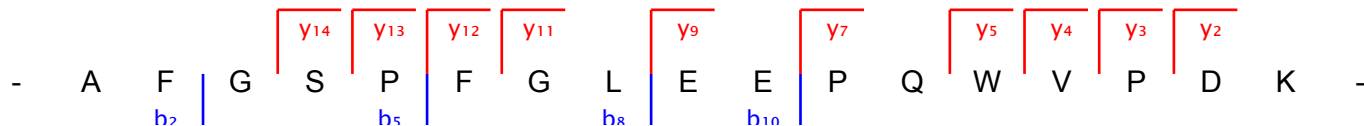

| Raw file                         | Scan  | Method   | Score | m/z     | Gene names |
|----------------------------------|-------|----------|-------|---------|------------|
| 20150226_Hela_Top_opt_A3_01_1591 | 65859 | TOF; CID | 84.51 | 1110.53 | TRIO       |

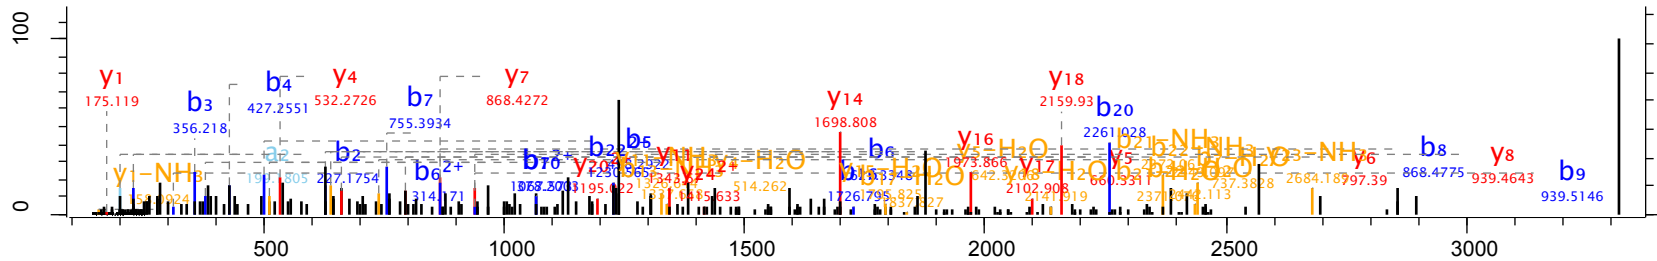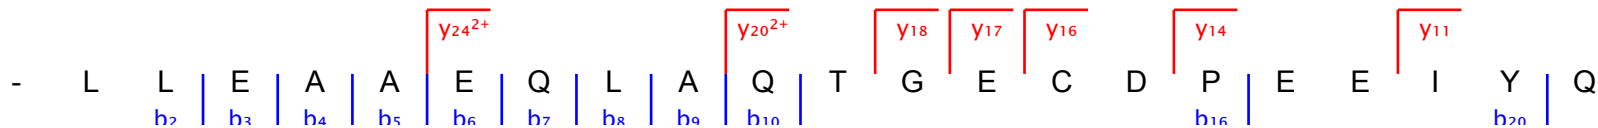



| Raw file                         | Scan  | Method   | Score | m/z    | Gene names |
|----------------------------------|-------|----------|-------|--------|------------|
| 20150226_Hela_Top_opt_A3_01_1591 | 66206 | TOF; CID | 48.39 | 868.45 | MTFR1L     |

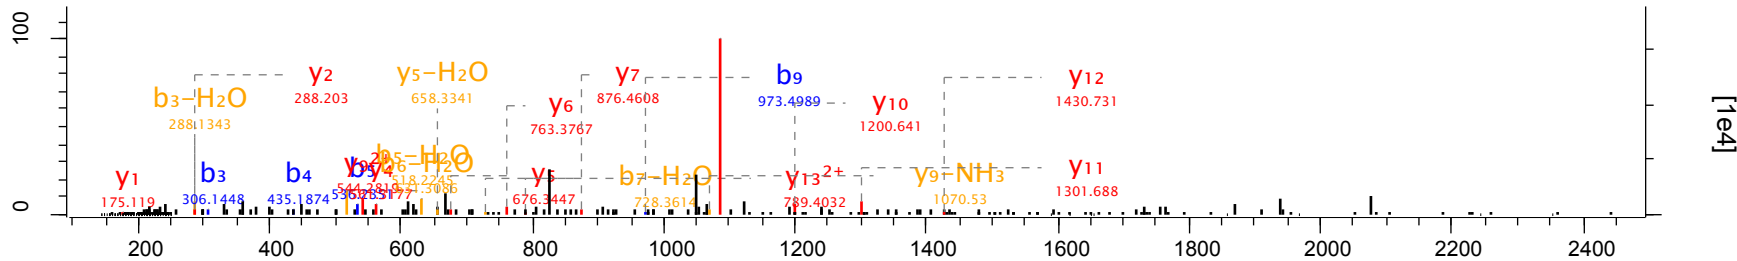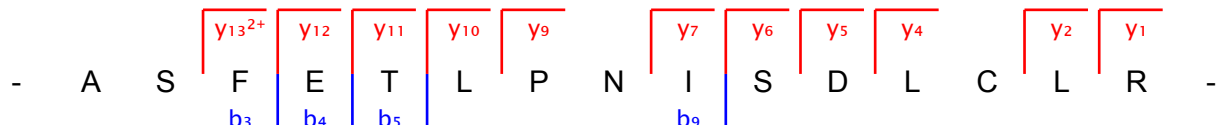

| Raw file                         | Scan  | Method   | Score | m/z    | Gene names |
|----------------------------------|-------|----------|-------|--------|------------|
| 20150226_Hela_Top_opt_A3_01_1591 | 66453 | TOF; CID | 81.32 | 941.49 | SLC7A6OS   |

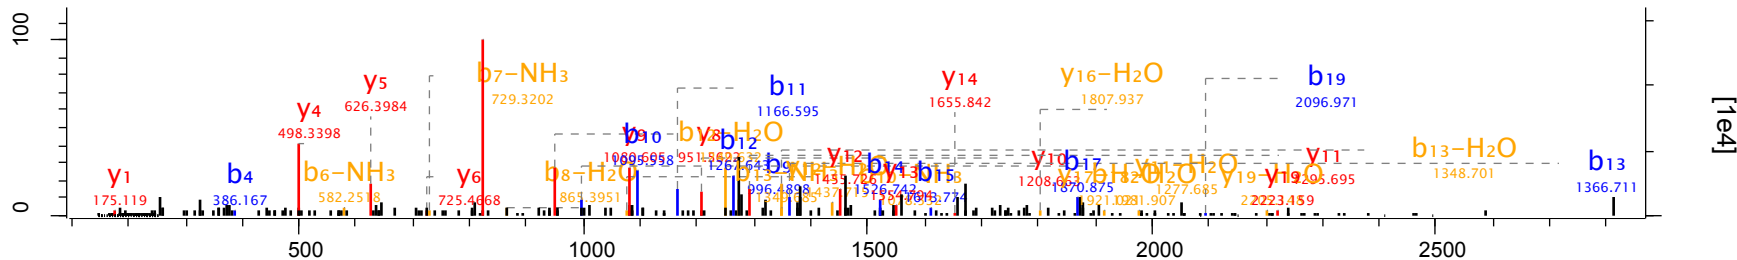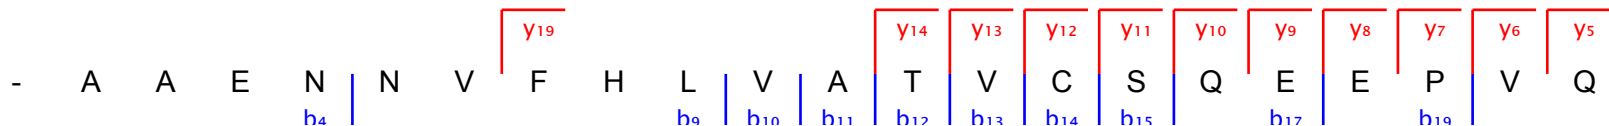

| Raw file                         | Scan  | Method   | Score | m/z     | Gene names |
|----------------------------------|-------|----------|-------|---------|------------|
| 20150226_Hela_Top_opt_A3_01_1591 | 67279 | TOF; CID | 83.88 | 1348.99 | C1orf174   |

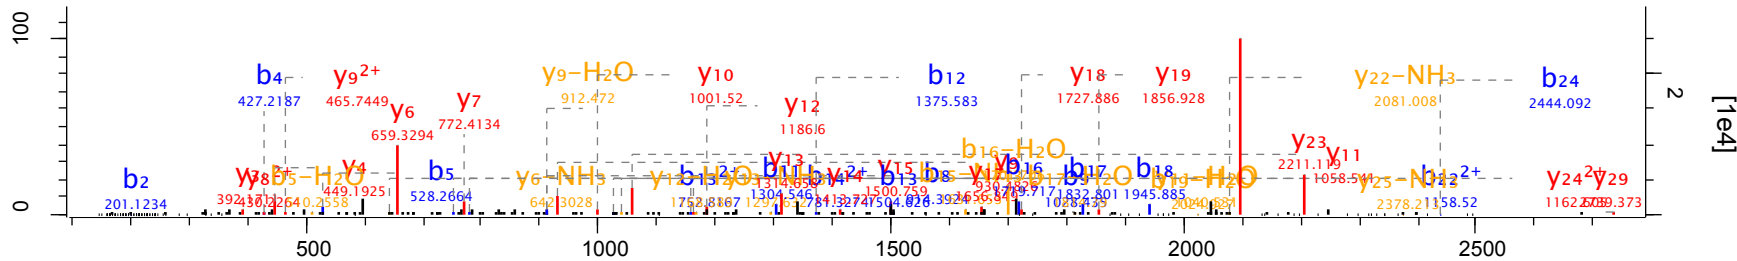

- V T P E T P C E N E F A E G S A L L P G S  
   b<sub>2</sub> | b<sub>4</sub> | b<sub>5</sub> | b<sub>8</sub> | b<sub>9</sub> | b<sub>11</sub> | b<sub>12</sub> | b<sub>13</sub> | b<sub>14</sub><sup>2+</sup> | b<sub>16</sub> | b<sub>17</sub> | b<sub>18</sub>

| Raw file                         | Scan  | Method   | Score | m/z    | Gene names |
|----------------------------------|-------|----------|-------|--------|------------|
| 20150226_Hela_Top_opt_A3_01_1591 | 68249 | TOF; CID | 63.19 | 859.45 | TRAPPC2L   |

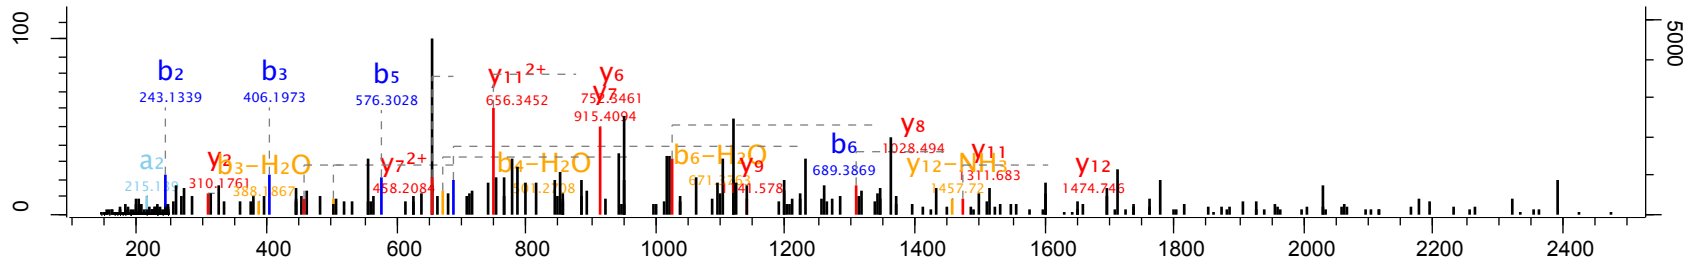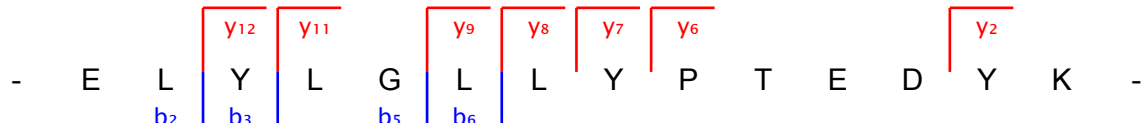

| Raw file                         | Scan  | Method   | Score | m/z    | Gene names |
|----------------------------------|-------|----------|-------|--------|------------|
| 20150226_Hela_Top_opt_A3_01_1591 | 68849 | TOF; CID | 86.21 | 820.96 | ATP6V0D2   |

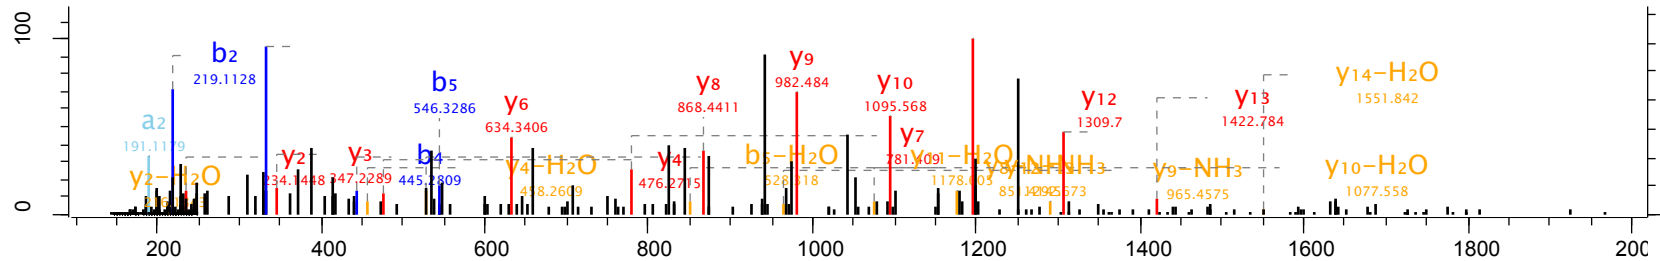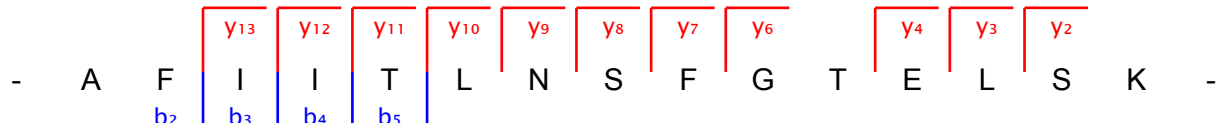

| Raw file                         | Scan  | Method   | Score | m/z | Gene names |
|----------------------------------|-------|----------|-------|-----|------------|
| 20150226_Hela_Top_opt_A3_01_1591 | 68941 | TOF; CID | 44.82 | 644 | ATE1       |

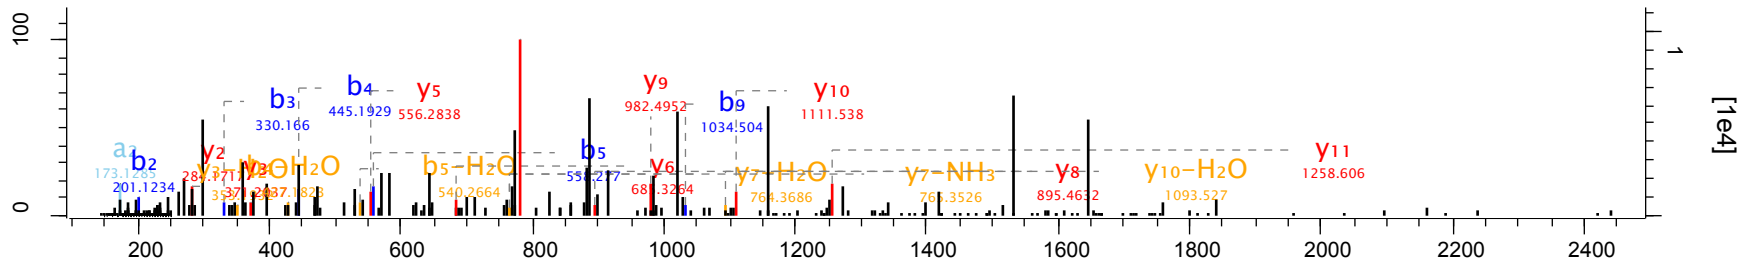

- S L E D L I F E S L P E N A S H K -

b<sub>2</sub> | b<sub>3</sub> | b<sub>4</sub> | b<sub>5</sub> | b<sub>9</sub>

y<sub>11</sub> | y<sub>10</sub> | y<sub>9</sub> | y<sub>8</sub> | y<sub>7</sub> | y<sub>6</sub> | y<sub>5</sub> | y<sub>3</sub> | y<sub>2</sub>

| Raw file                         | Scan  | Method   | Score | m/z    | Gene names |
|----------------------------------|-------|----------|-------|--------|------------|
| 20150226_Hela_Top_opt_A3_01_1591 | 69258 | TOF; CID | 82.52 | 971.84 | COX11      |

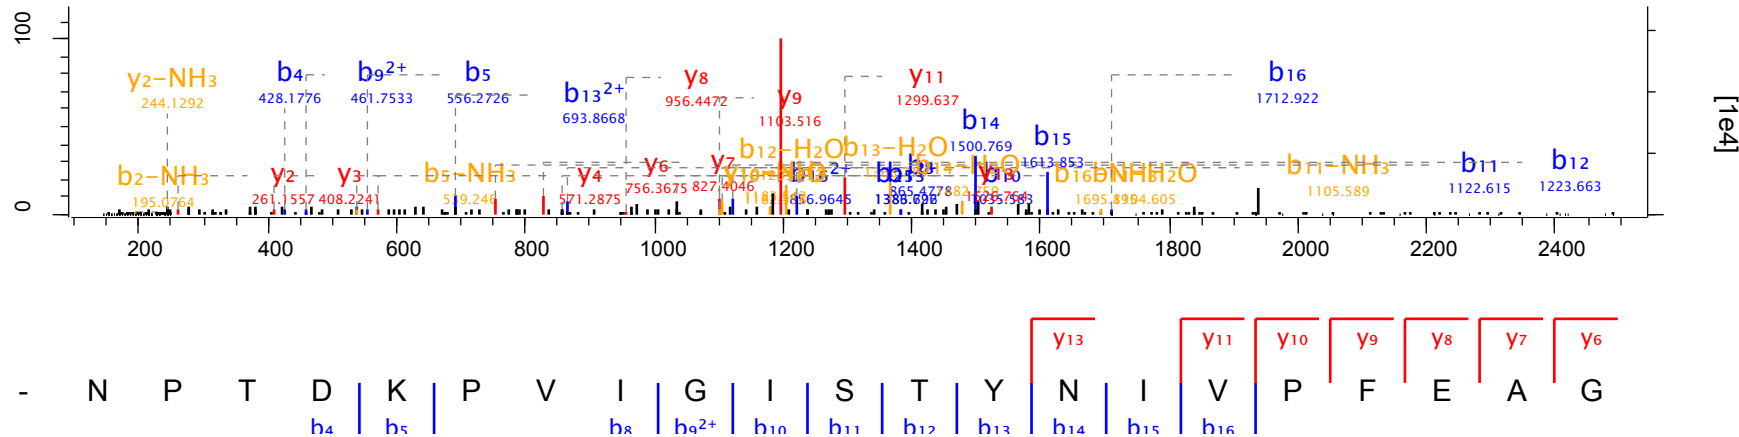

| Raw file                         | Scan  | Method   | Score  | m/z    | Gene names |
|----------------------------------|-------|----------|--------|--------|------------|
| 20150226_Hela_Top_opt_A3_01_1591 | 70583 | TOF; CID | 135.54 | 676.36 | HAUS8      |

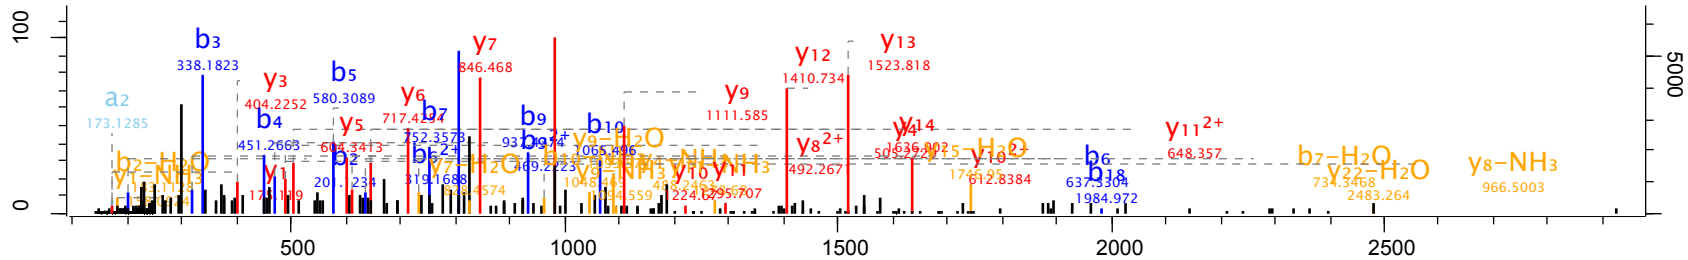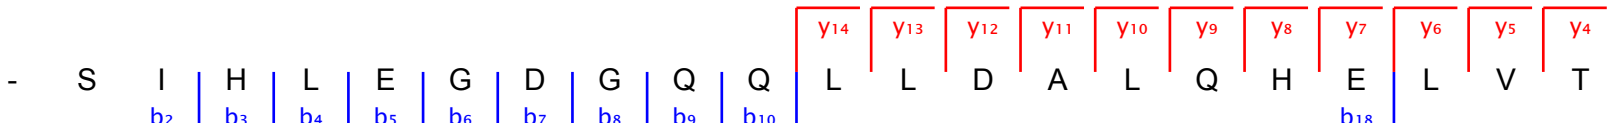



Raw file

20150226\_Hela\_Top\_opt\_A3\_01\_1591

Scan

71104

Method

TOF; CID

Score

45.42

m/z

782.09

Gene names

AP5S1

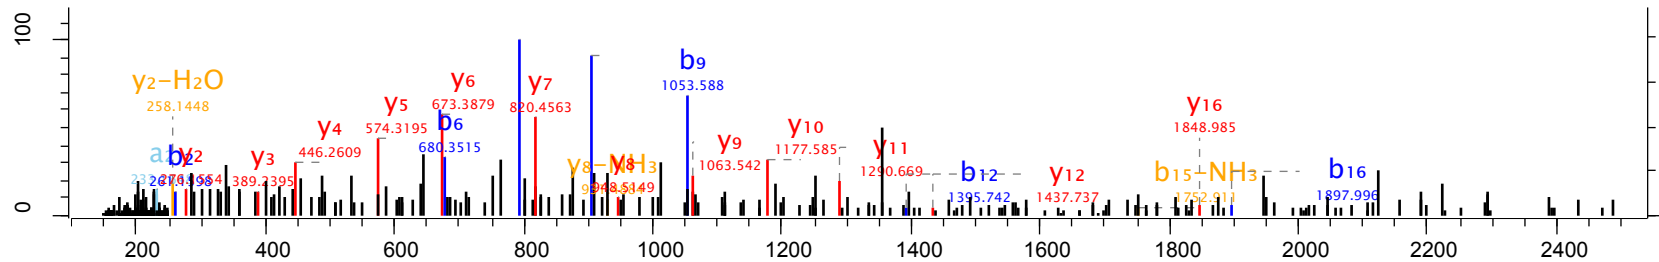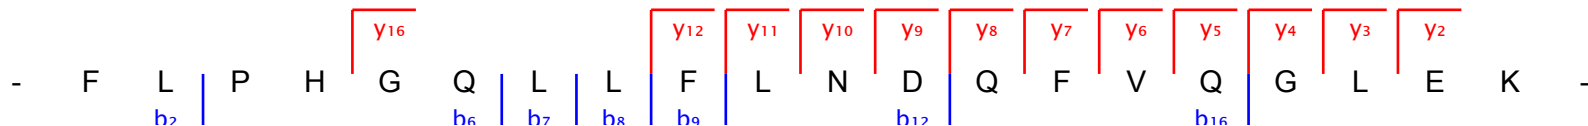

| Raw file                         | Scan  | Method   | Score | m/z    | Gene names |
|----------------------------------|-------|----------|-------|--------|------------|
| 20150226_Hela_Top_opt_A3_01_1591 | 71216 | TOF; CID | 74.27 | 517.81 | TMEM167A   |

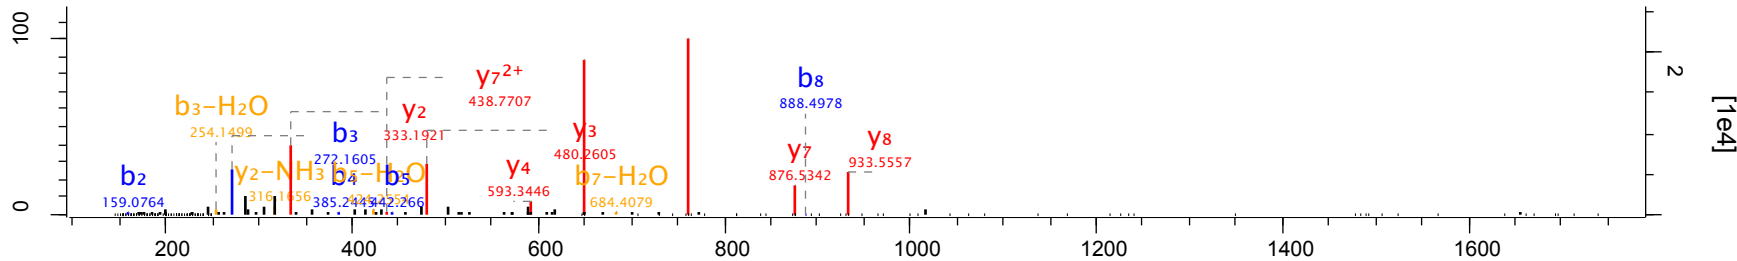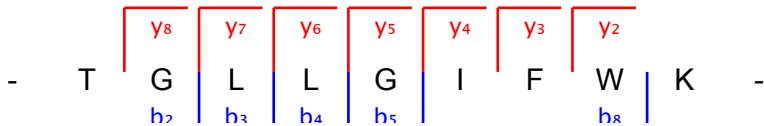

| Raw file                         | Scan  | Method   | Score | m/z    | Gene names |
|----------------------------------|-------|----------|-------|--------|------------|
| 20150226_Hela_Top_opt_A3_01_1591 | 71484 | TOF; CID | 58.98 | 506.34 | ZBED1      |

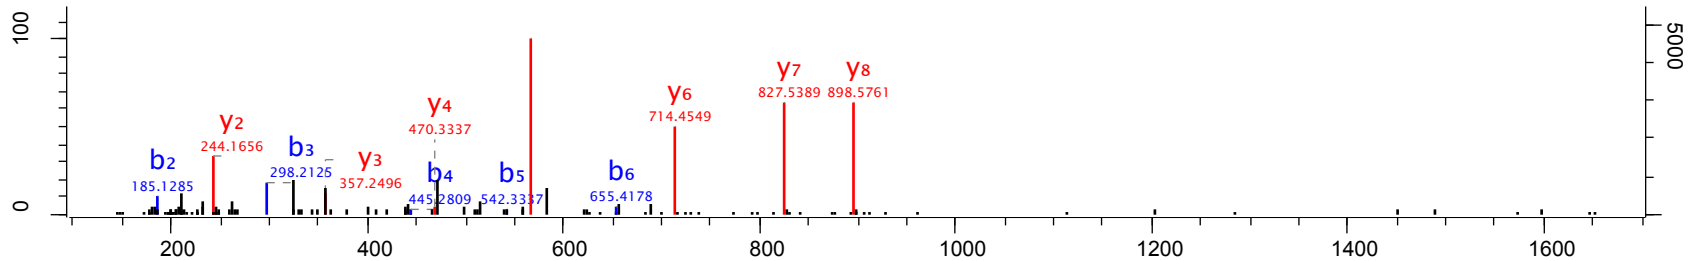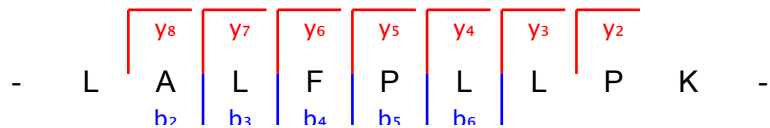

Raw file

20150226\_Hela\_Top\_opt\_A3\_01\_1591

Scan

73279

Method

TOF; CID

Score

78.13

m/z

913.85

Gene names

BCL2L13

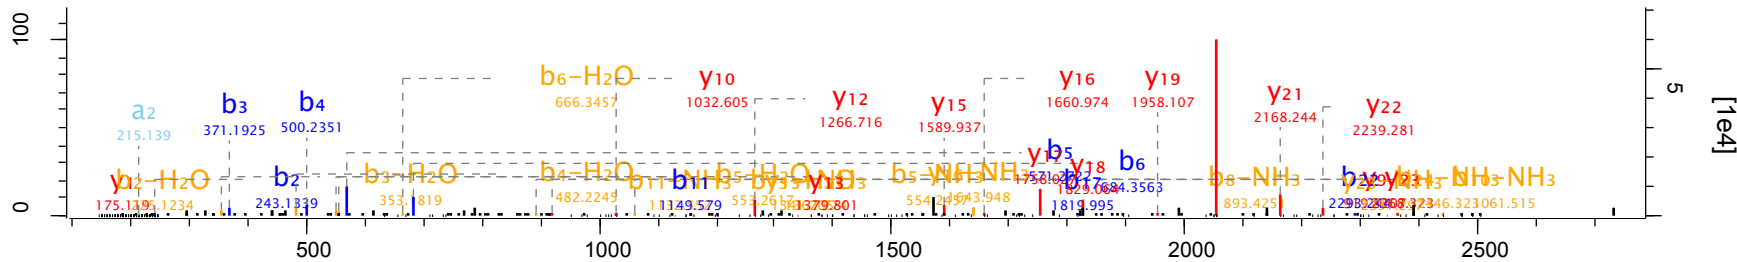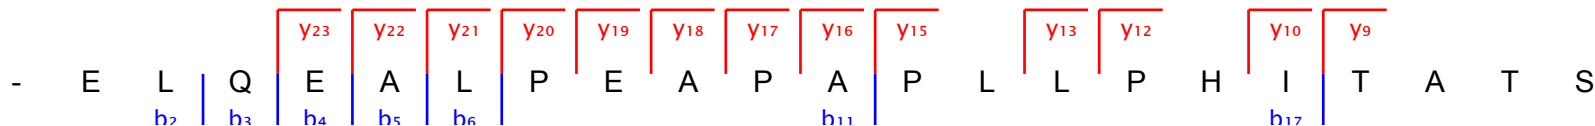

| Raw file                         | Scan  | Method   | Score | m/z    | Gene names |
|----------------------------------|-------|----------|-------|--------|------------|
| 20150226_Hela_Top_opt_A3_01_1591 | 73482 | TOF; CID | 78.98 | 846.43 | ADCY3      |

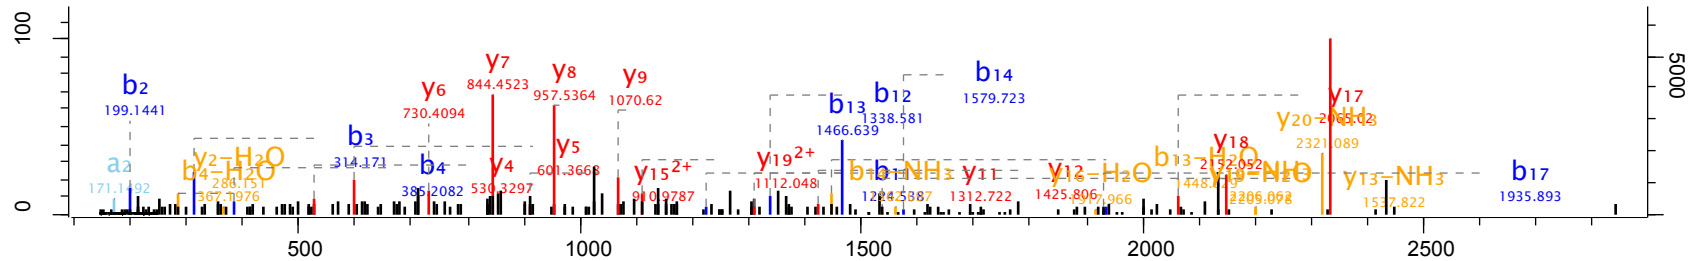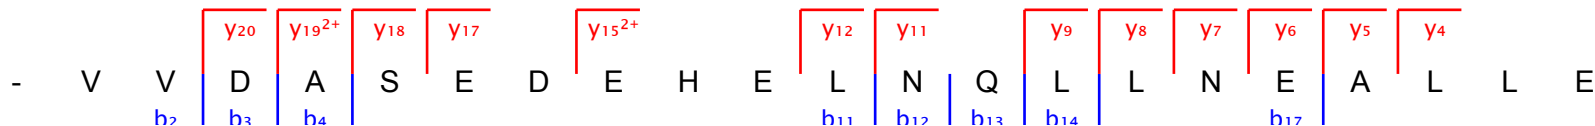

| Raw file                         | Scan  | Method   | Score | m/z    | Gene names |
|----------------------------------|-------|----------|-------|--------|------------|
| 20150226_Hela_Top_opt_A3_01_1591 | 73709 | TOF; CID | 79.12 | 478.83 | GXYLT1     |

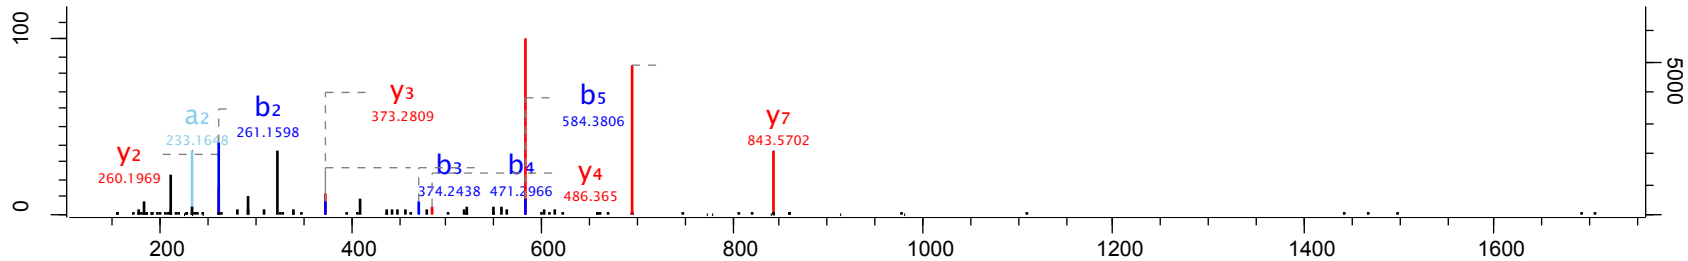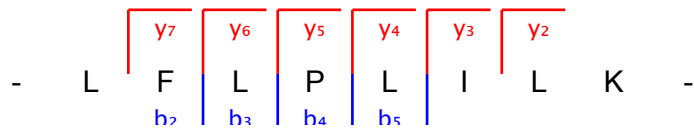

Raw file  
 20150226\_Hela\_Top\_opt\_A3\_01\_1591  
 Scan 73968 Method TOF; CID Score 67.67 m/z 824.44 Gene names CCDC117

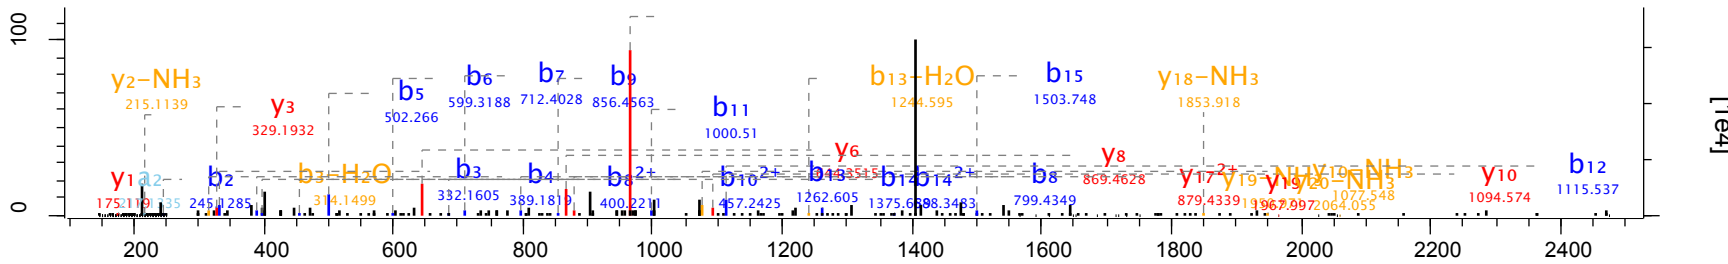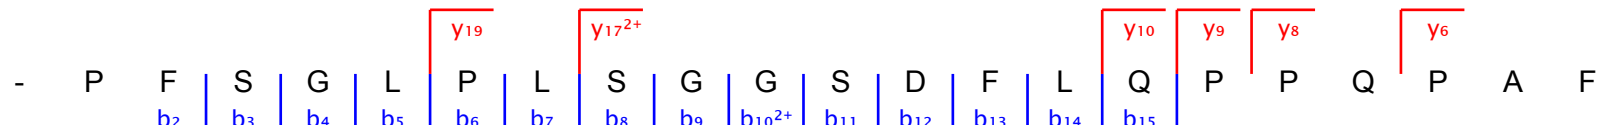

| Raw file                         | Scan  | Method   | Score | m/z    | Gene names |
|----------------------------------|-------|----------|-------|--------|------------|
| 20150226_Hela_Top_opt_A3_01_1591 | 74366 | TOF; CID | 99.32 | 1154.5 | VMP1       |

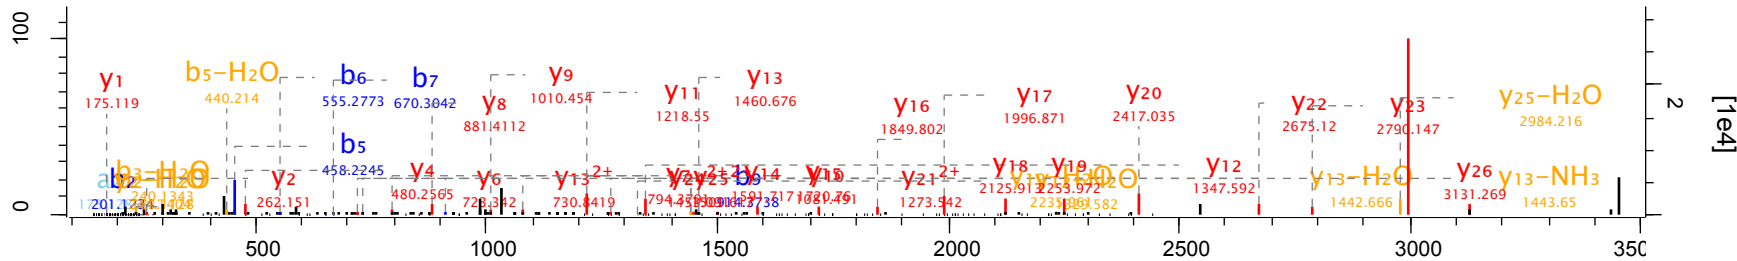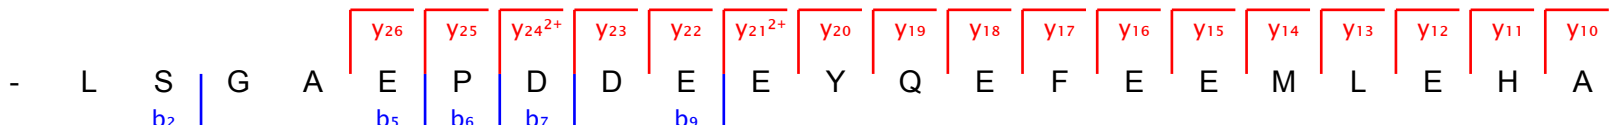



| Raw file                         | Scan  | Method   | Score | m/z    | Gene names |
|----------------------------------|-------|----------|-------|--------|------------|
| 20150226_Hela_Top_opt_A3_01_1591 | 74777 | TOF; CID | 92.8  | 656.02 | AMBRA1     |

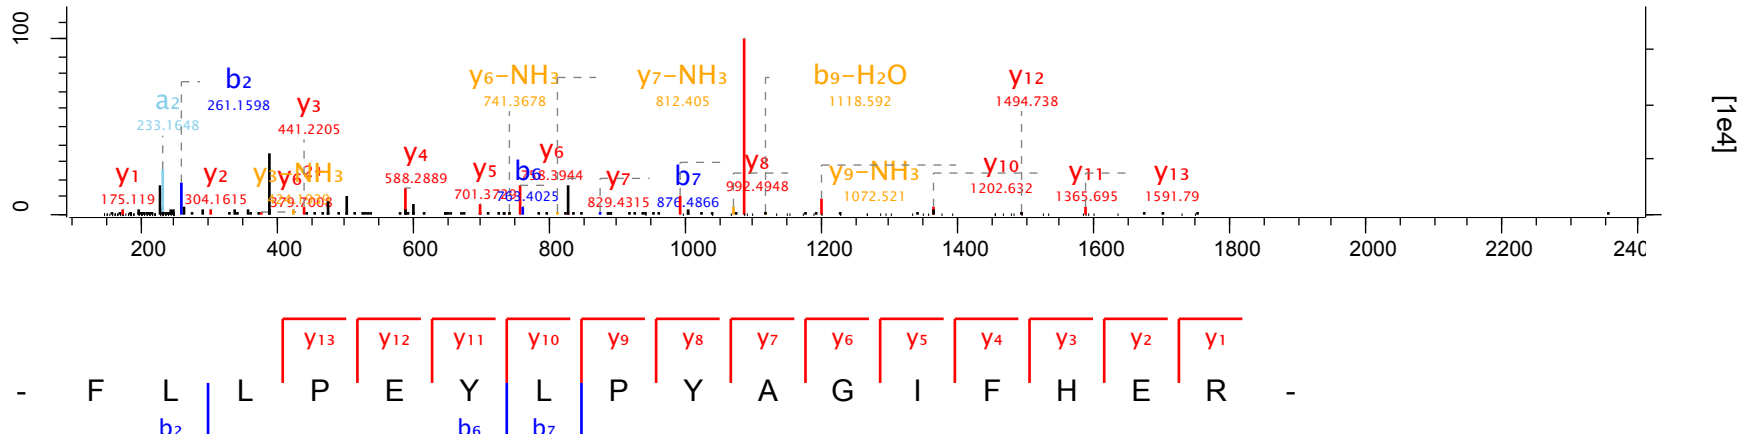

| Raw file                         | Scan  | Method   | Score | m/z    | Gene names |
|----------------------------------|-------|----------|-------|--------|------------|
| 20150226_Hela_Top_opt_A3_01_1591 | 75199 | TOF; CID | 58.17 | 711.88 | AAK1;BMP2K |

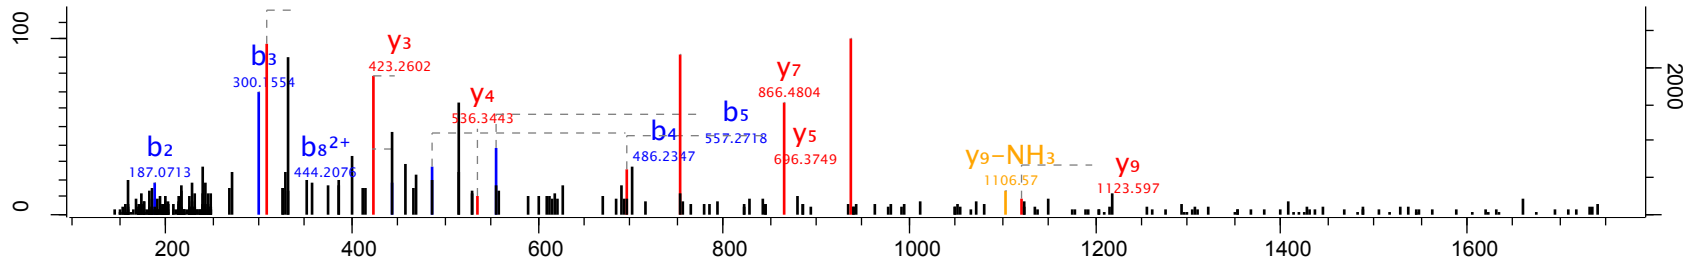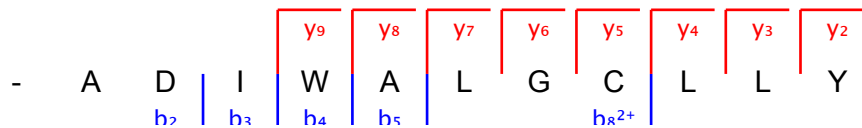

Raw file

20150226\_Hela\_Top\_opt\_A3\_01\_1591

Scan

75695

Method

TOF; CID

Score

47.75

m/z

803.07

Gene names

NDUFAF6

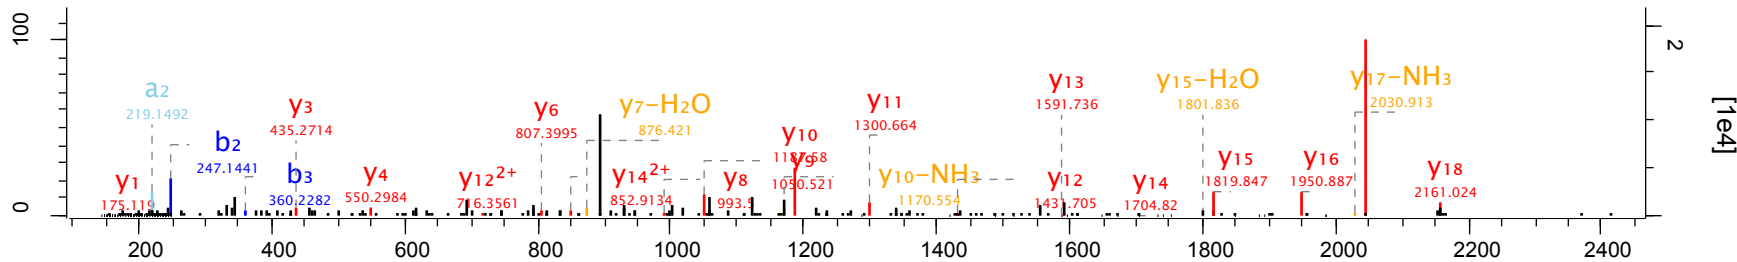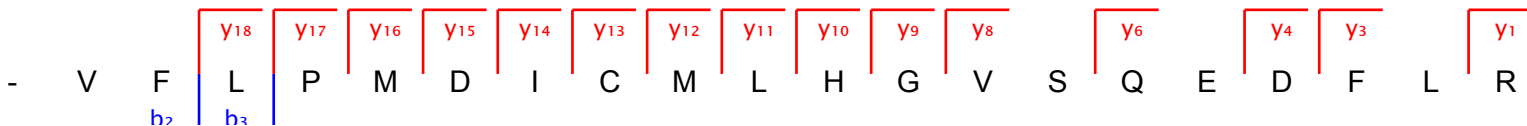

| Raw file                         | Scan  | Method   | Score  | m/z    | Gene names |
|----------------------------------|-------|----------|--------|--------|------------|
| 20150226_Hela_Top_opt_A3_01_1591 | 78485 | TOF; CID | 102.97 | 802.43 | CEP164     |

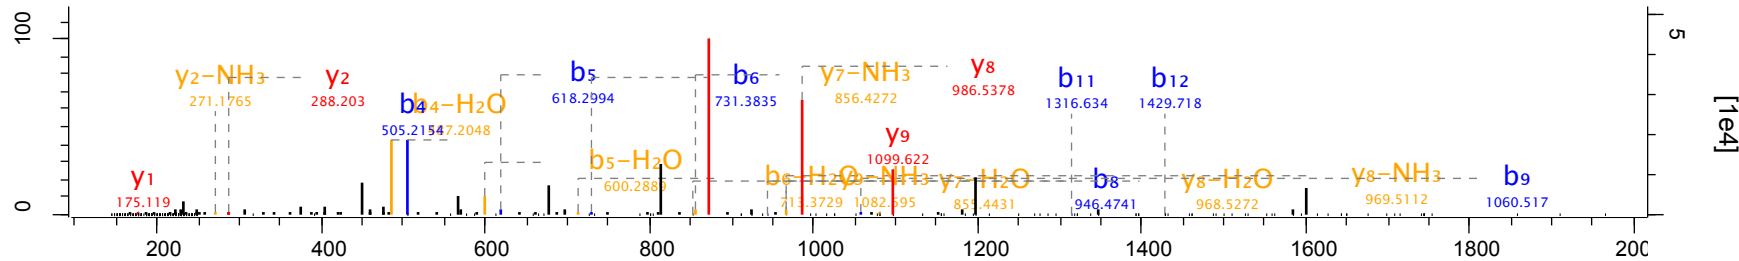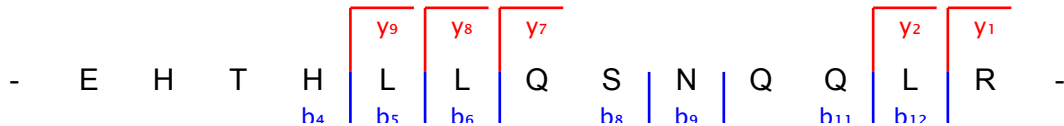

| Raw file                         | Scan  | Method   | Score | m/z    | Gene names |
|----------------------------------|-------|----------|-------|--------|------------|
| 20150226_Hela_Top_opt_A3_01_1591 | 78836 | TOF; CID | 93.37 | 759.37 | TRABD      |

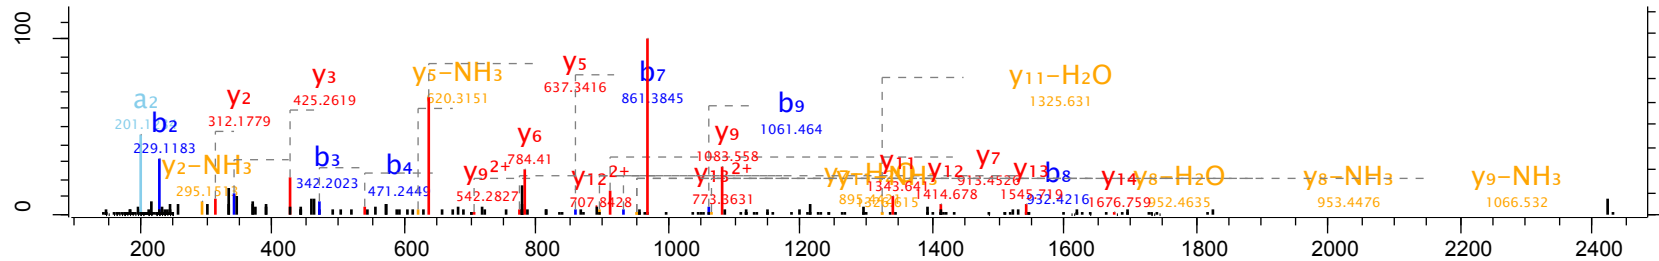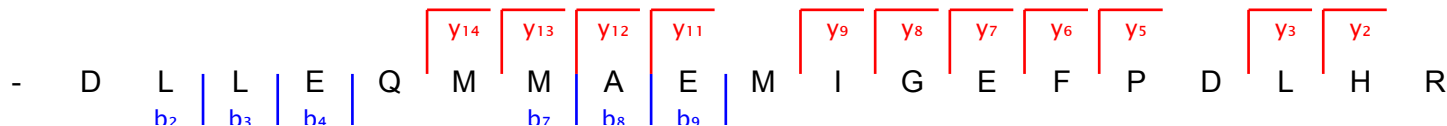

| Raw file                         | Scan | Method   | Score | m/z    | Gene names  |
|----------------------------------|------|----------|-------|--------|-------------|
| 20150226_Hela_Top_opt_A3_01_1593 | 3374 | TOF; CID | 82.64 | 320.86 | HMGN2;HMGN3 |

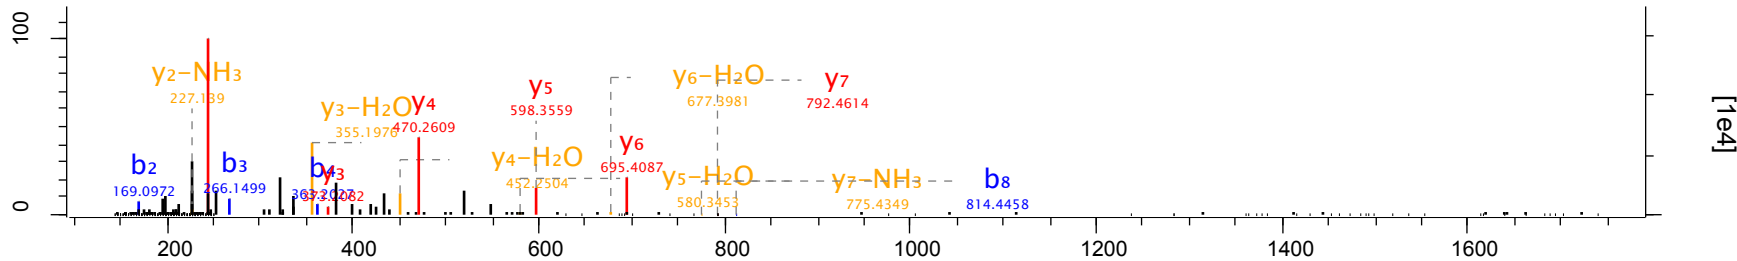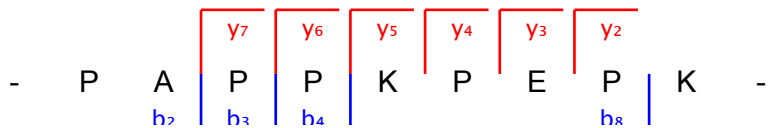

Raw file

20150226\_Hela\_Top\_opt\_A3\_01\_1593

Scan

3407

Method

TOF; CID

Score

71.18

m/z

669.81

Gene names

MANBAL

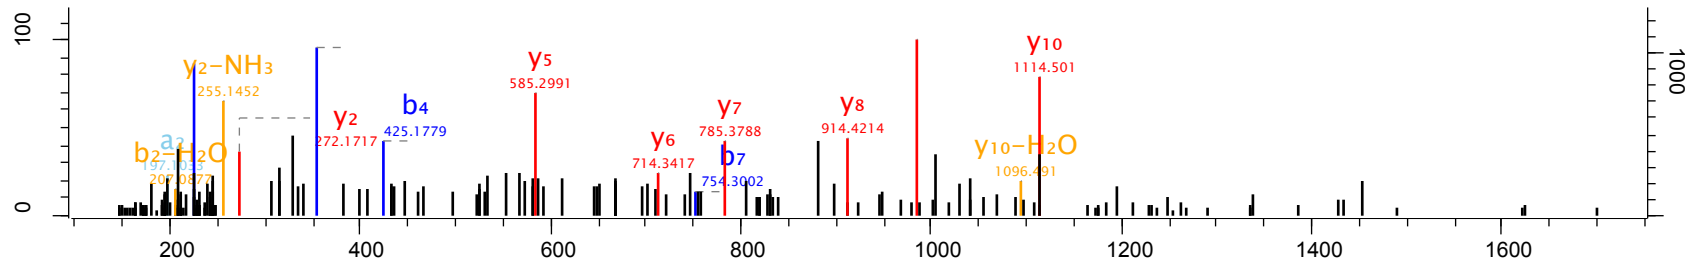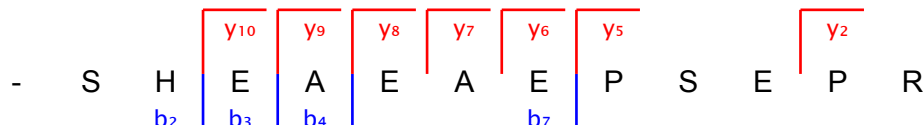

Raw file

20150226\_Hela\_Top\_opt\_A3\_01\_1593

Scan

3704

Method

TOF; CID

Score

94.09

m/z

537.27

Gene names

MT-CO3

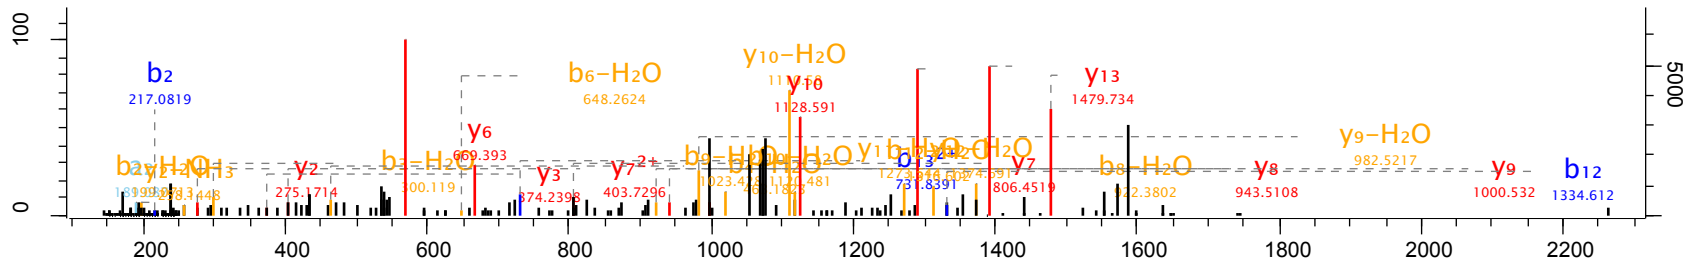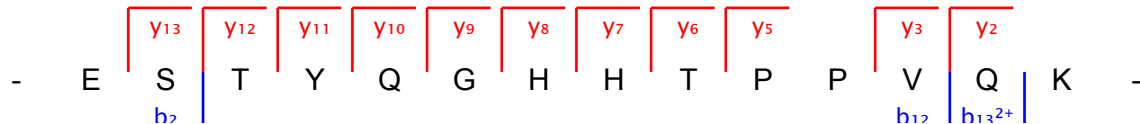



Raw file

20150226\_Hela\_Top\_opt\_A3\_01\_1593

Scan

4089

Method

TOF; CID

Score

78.9

m/z

656.82

Gene names

CCDC82

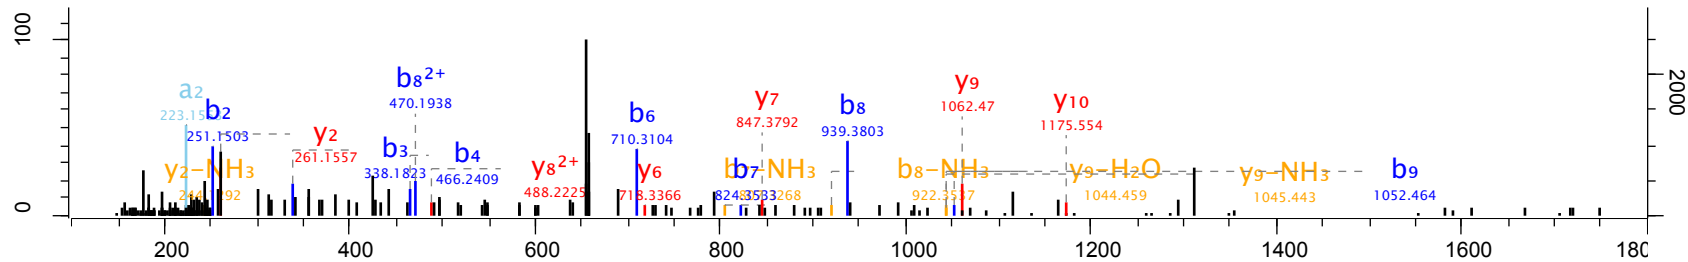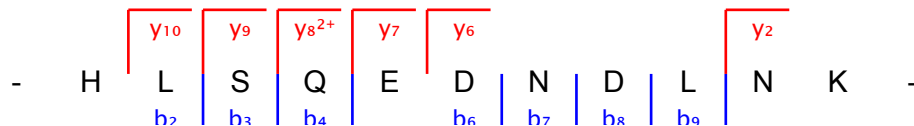

Raw file

Scan

Method

Score

m/z

Gene names

20150226\_Hela\_Top\_opt\_A3\_01\_1593

4313

TOF; CID

58.7

601.82

ZNF557

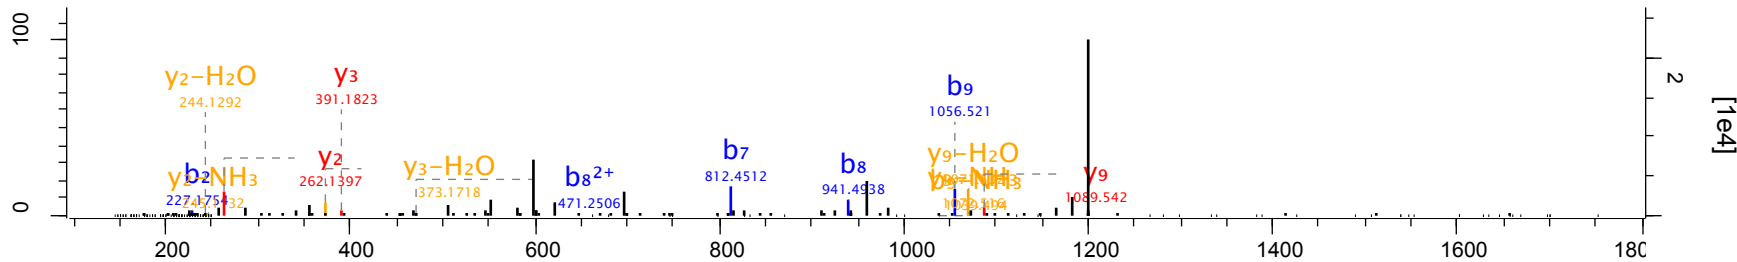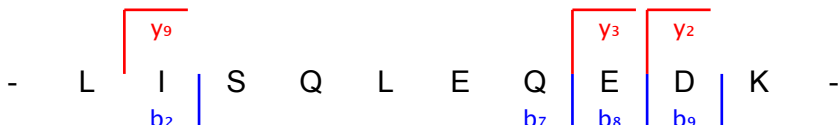

Raw file

20150226\_Hela\_Top\_opt\_A3\_01\_1593

Scan

4843

Method

TOF; CID

Score

128.85

m/z

589.8

Gene names

SLC16A7

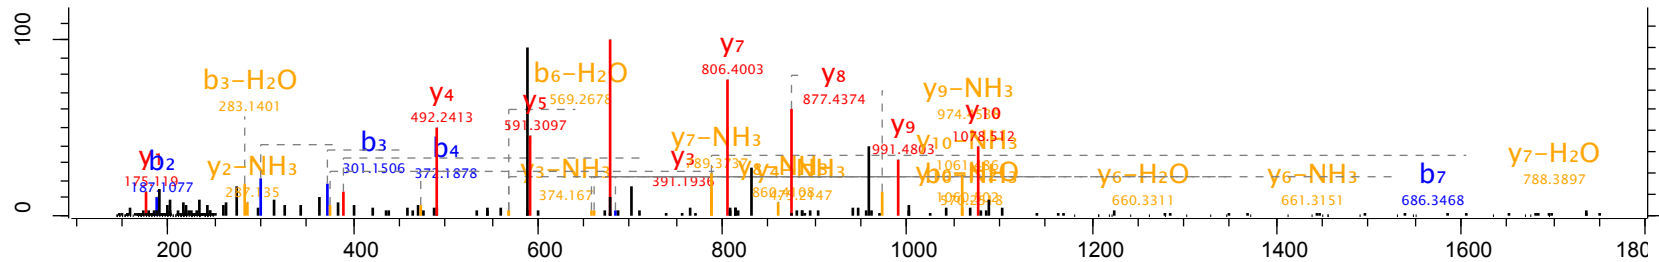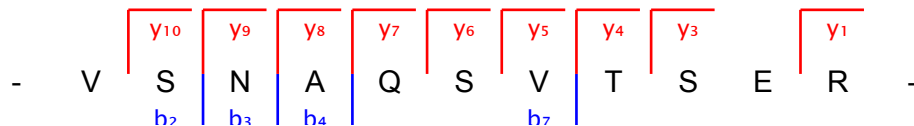

Raw file

20150226\_Hela\_Top\_opt\_A3\_01\_1593

Scan

5402

Method

TOF; CID

Score

63.16

m/z

732.36

Gene names

MAX

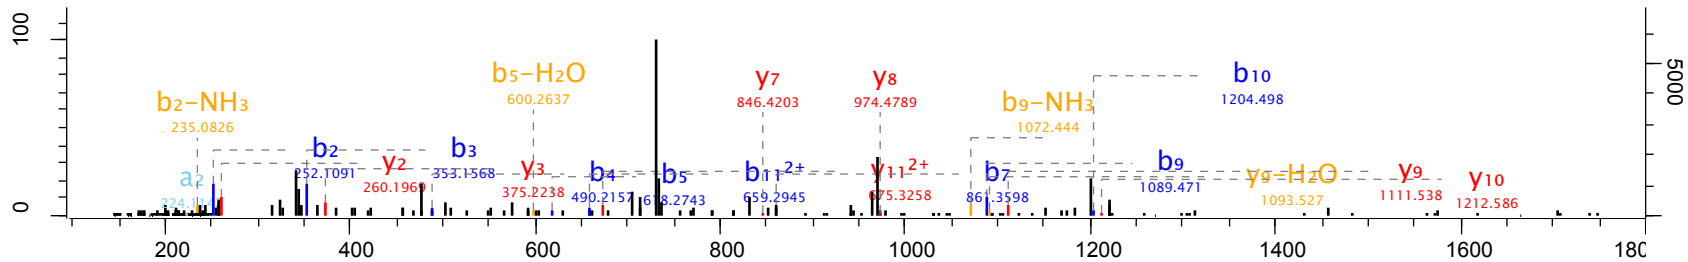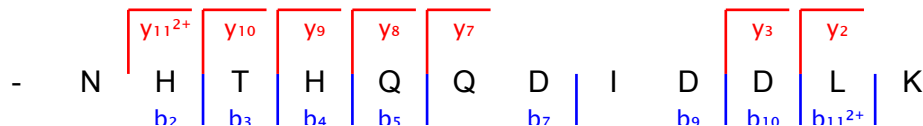

Raw file

20150226\_Hela\_Top\_opt\_A3\_01\_1593

Scan

6215

Method

TOF; CID

Score

57.4

m/z

612.78

Gene names

PDZD8

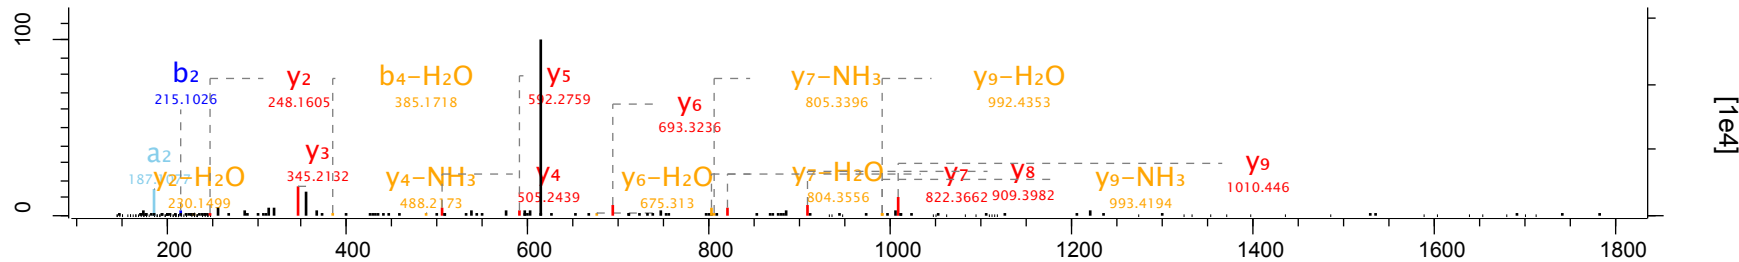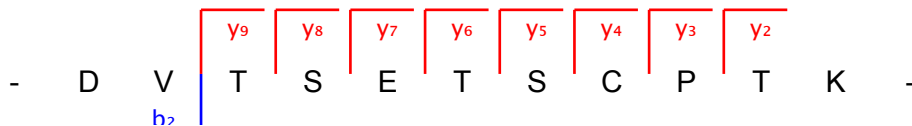

[1e4]

| Raw file                         | Scan | Method   | Score  | m/z    | Gene names |
|----------------------------------|------|----------|--------|--------|------------|
| 20150226_Hela_Top_opt_A3_01_1593 | 6290 | TOF; CID | 162.31 | 458.76 | ZC3H6      |

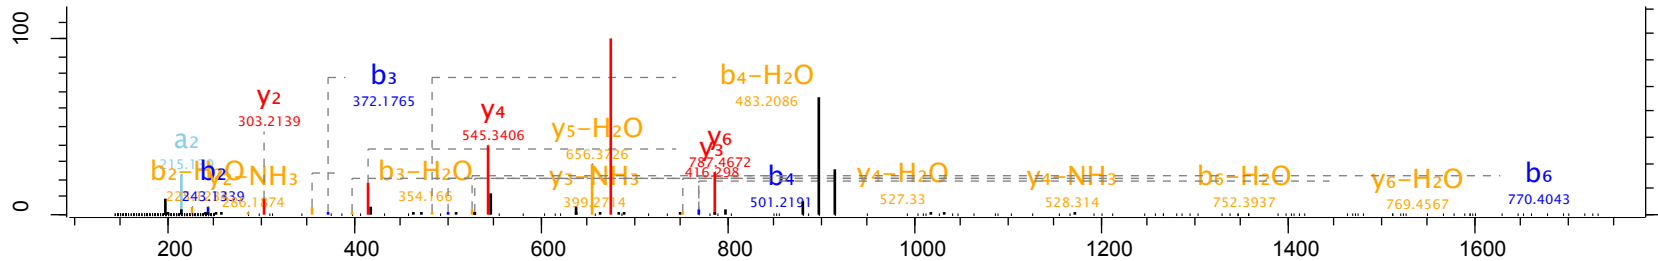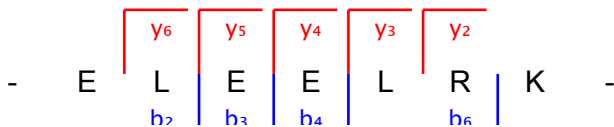

[1e4]

| Raw file                         | Scan | Method   | Score | m/z    | Gene names |
|----------------------------------|------|----------|-------|--------|------------|
| 20150226_Hela_Top_opt_A3_01_1593 | 6645 | TOF; CID | 43.37 | 682.62 | TGFBR1     |

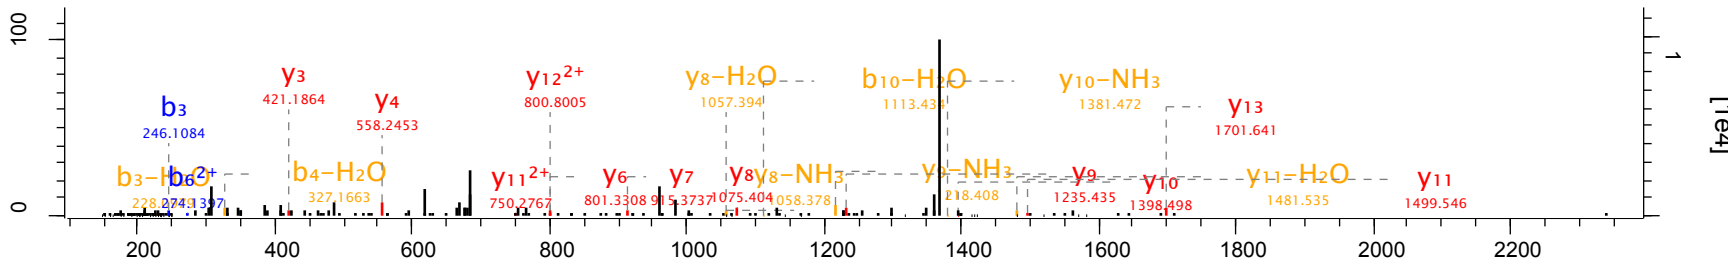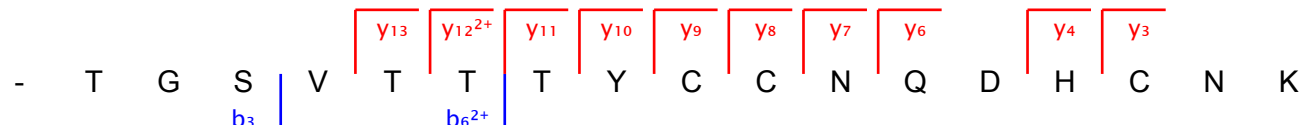

Raw file

20150226\_Hela\_Top\_opt\_A3\_01\_1593

Scan

7170

Method

TOF; CID

Score

57.28

m/z

867.37

Gene names

CREBBP

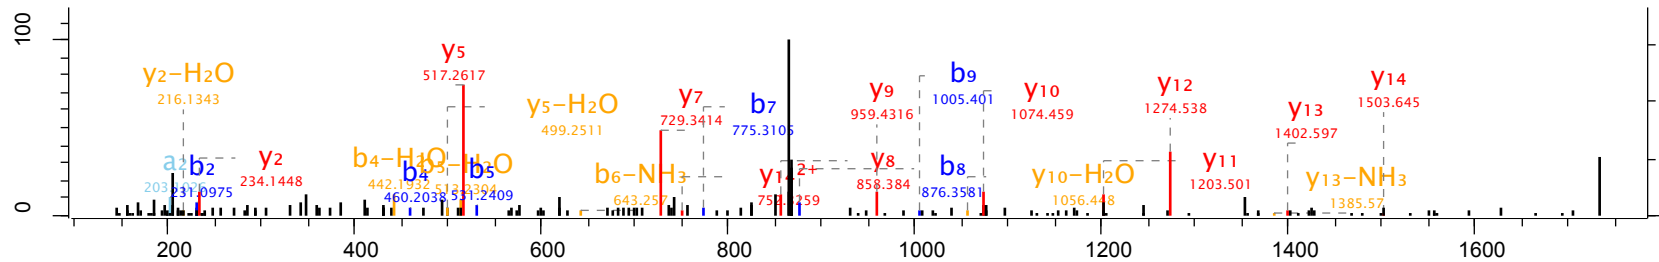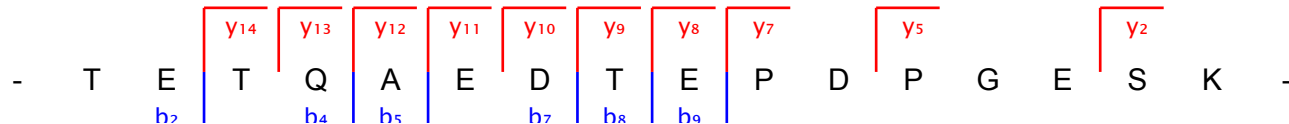



Raw file

Scan

Method

Score

m/z

Gene names

20150226\_Hela\_Top\_opt\_A3\_01\_1593

7995

TOF; CID

60.31

613.27

OSMR

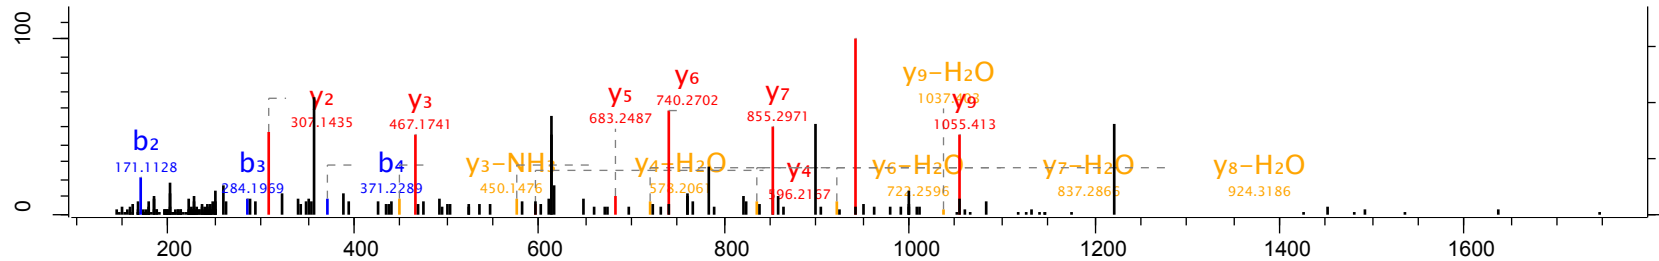

- A V L S D G S E C C K -  
 b<sub>2</sub> b<sub>3</sub> b<sub>4</sub> y<sub>9</sub> y<sub>8</sub> y<sub>7</sub> y<sub>6</sub> y<sub>5</sub> y<sub>4</sub> y<sub>3</sub> y<sub>2</sub>

Raw file

Scan

Method

Score

m/z

Gene names

20150226\_Hela\_Top\_opt\_A3\_01\_1593

8655

TOF; CID

88.09

710.36

CKAP2

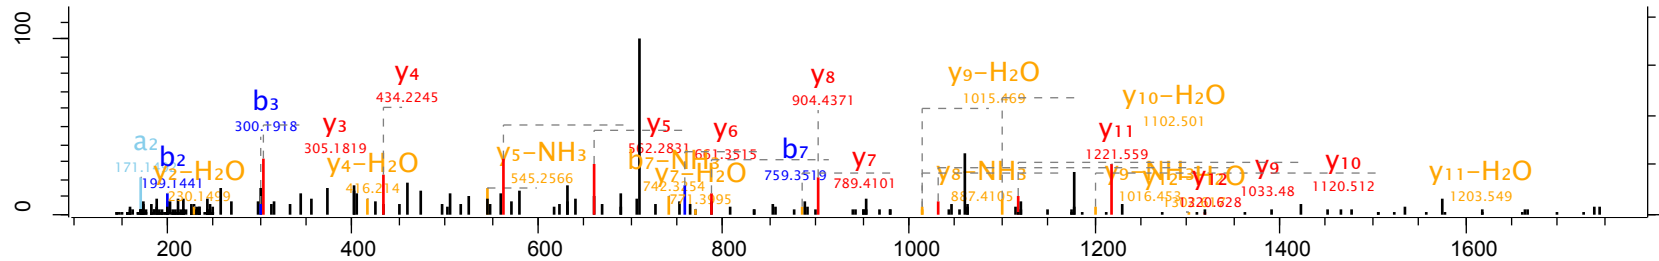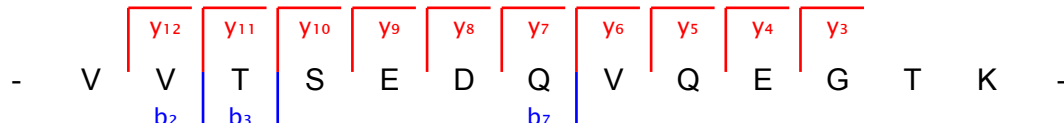

| Raw file                         | Scan | Method   | Score | m/z    | Gene names |
|----------------------------------|------|----------|-------|--------|------------|
| 20150226_Hela_Top_opt_A3_01_1593 | 9504 | TOF; CID | 47.62 | 540.91 | SLPI       |

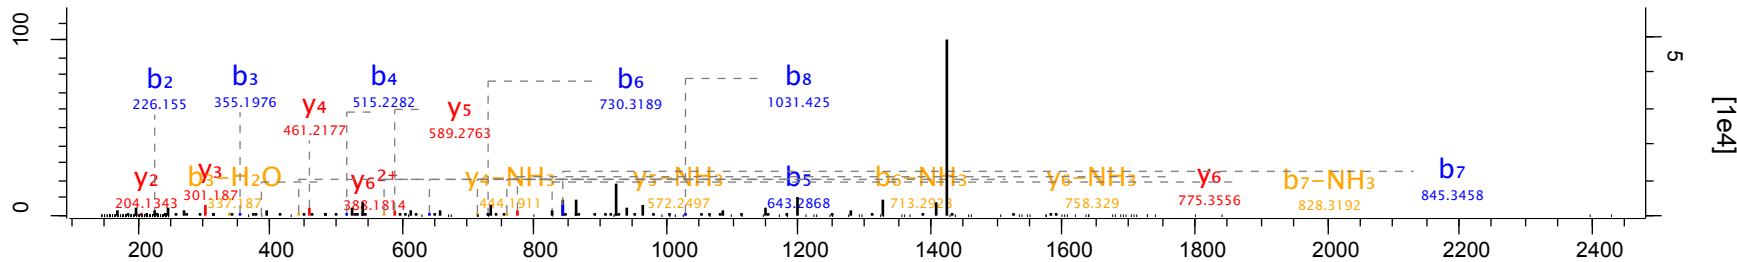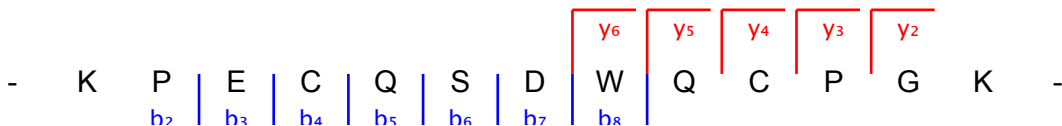

Raw file

20150226\_Hela\_Top\_opt\_A3\_01\_1593

Scan

9741

Method

TOF; CID

Score

79.87

m/z

780.82

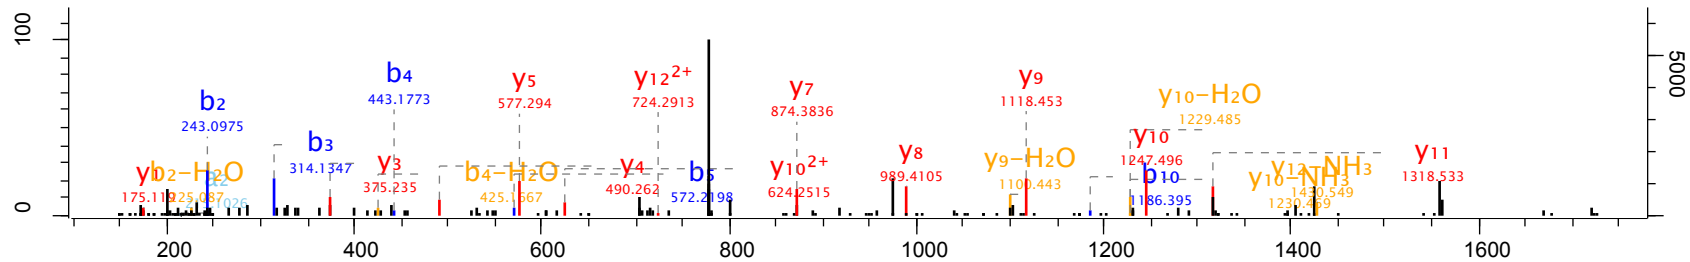

ac

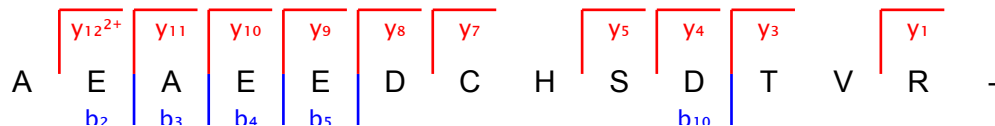

Raw file

20150226\_Hela\_Top\_opt\_A3\_01\_1593

Scan

10263

Method

TOF; CID

Score

55.69

m/z

810.4

Gene names

CIZ1

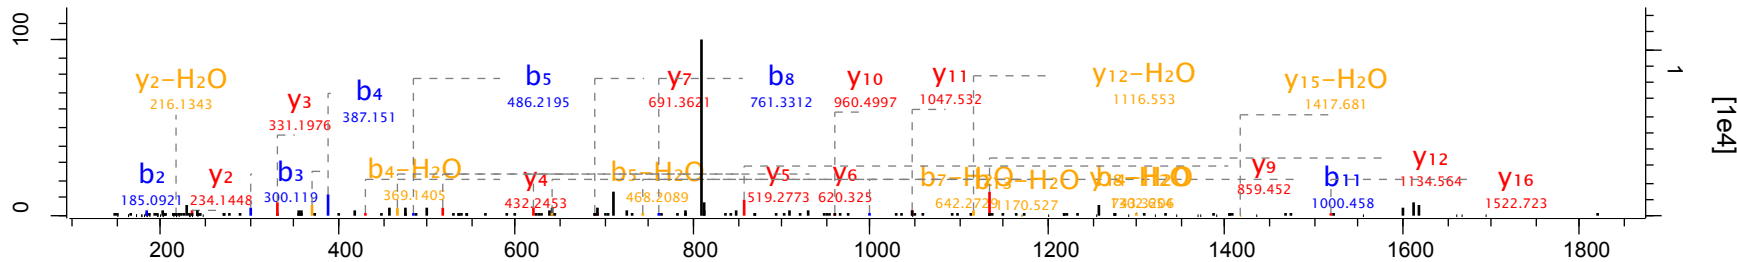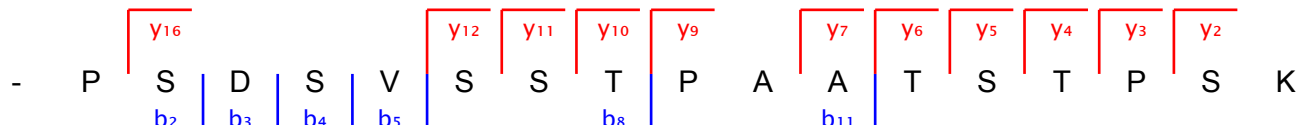

| Raw file                         | Scan  | Method   | Score | m/z   | Gene names |
|----------------------------------|-------|----------|-------|-------|------------|
| 20150226_Hela_Top_opt_A3_01_1593 | 11652 | TOF; CID | 60.89 | 641.3 | ARRDC1     |

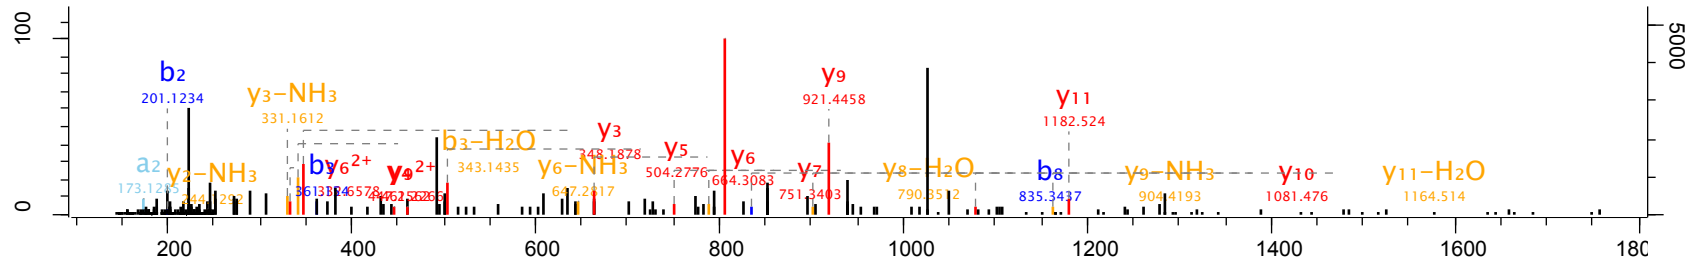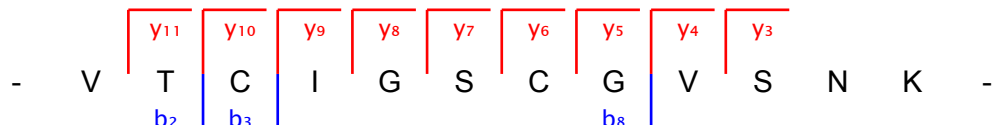

| Raw file                         | Scan  | Method   | Score | m/z    | Gene names |
|----------------------------------|-------|----------|-------|--------|------------|
| 20150226_Hela_Top_opt_A3_01_1593 | 12894 | TOF; CID | 67.12 | 669.82 | CEP41      |

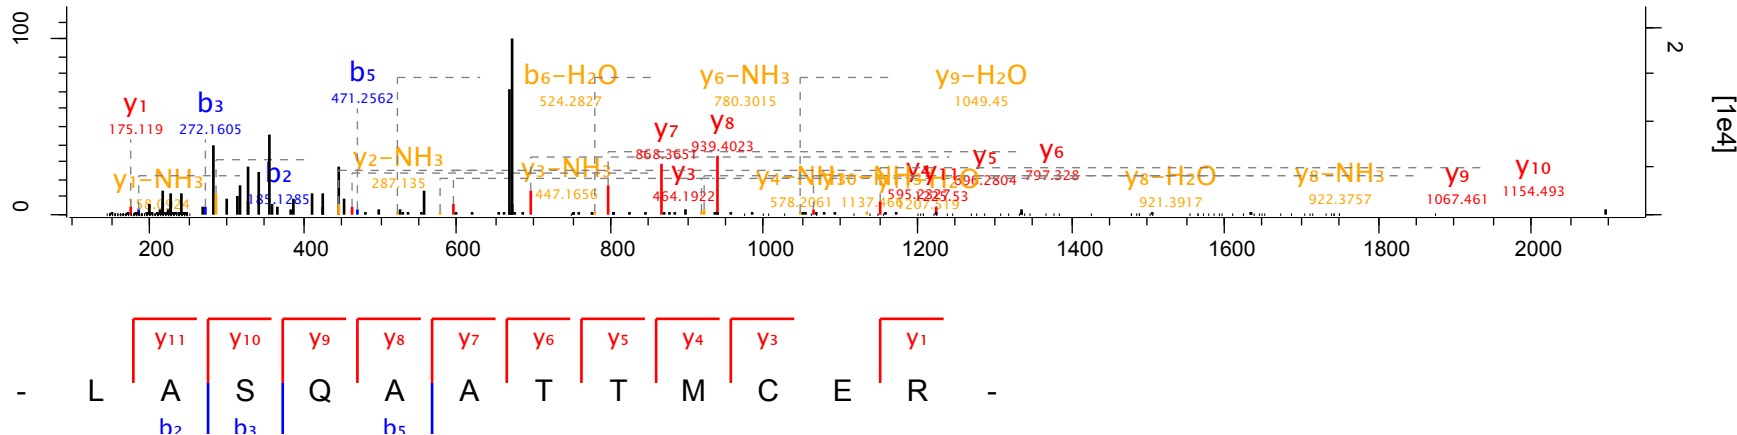

| Raw file                         | Scan  | Method   | Score | m/z    | Gene names |
|----------------------------------|-------|----------|-------|--------|------------|
| 20150226_Hela_Top_opt_A3_01_1593 | 13742 | TOF; CID | 95.96 | 428.77 | ARHGEF18   |

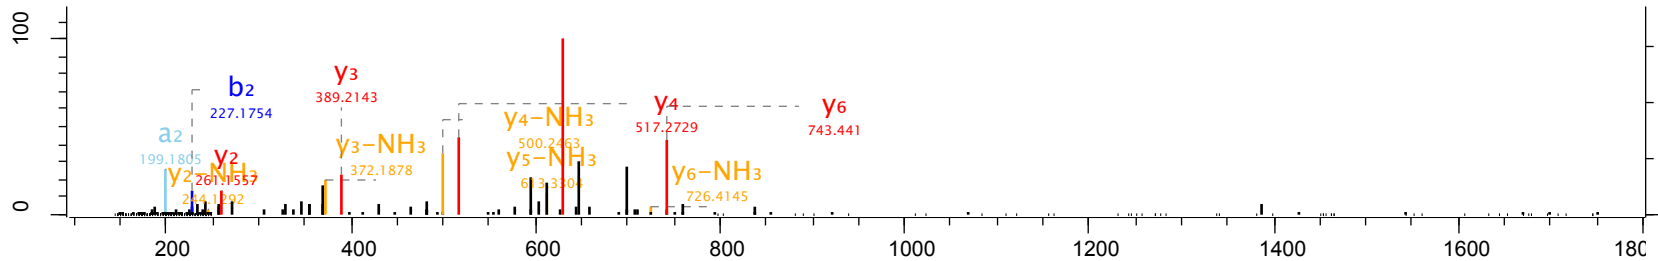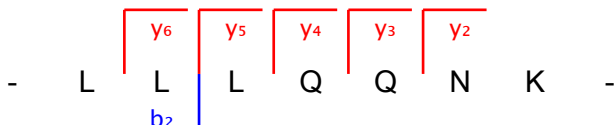

[1e4]



| Raw file                         | Scan  | Method   | Score | m/z    | Gene names |
|----------------------------------|-------|----------|-------|--------|------------|
| 20150226_Hela_Top_opt_A3_01_1593 | 15030 | TOF; CID | 72.2  | 596.76 | C5orf24    |

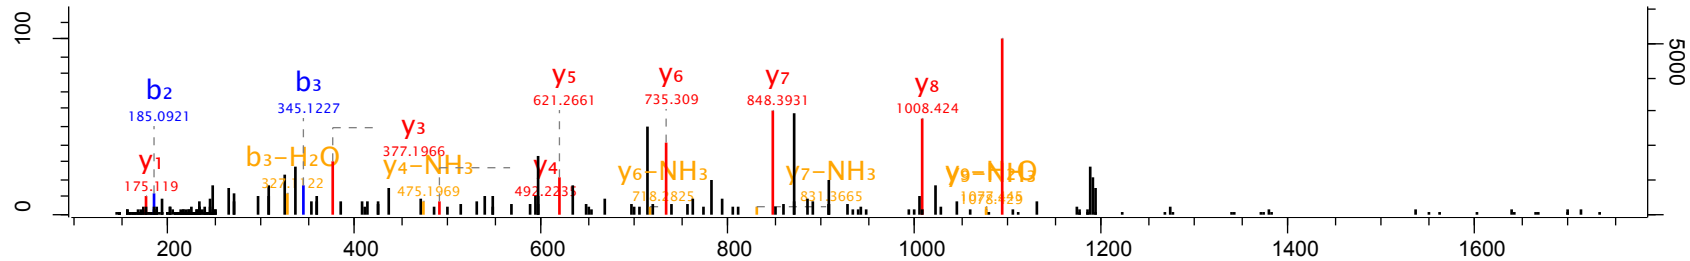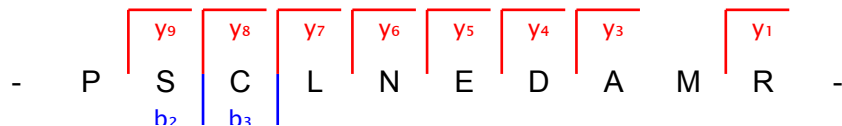

| Raw file                         | Scan  | Method   | Score | m/z    | Gene names |
|----------------------------------|-------|----------|-------|--------|------------|
| 20150226_Hela_Top_opt_A3_01_1593 | 15252 | TOF; CID | 46.53 | 730.36 | SLC38A10   |

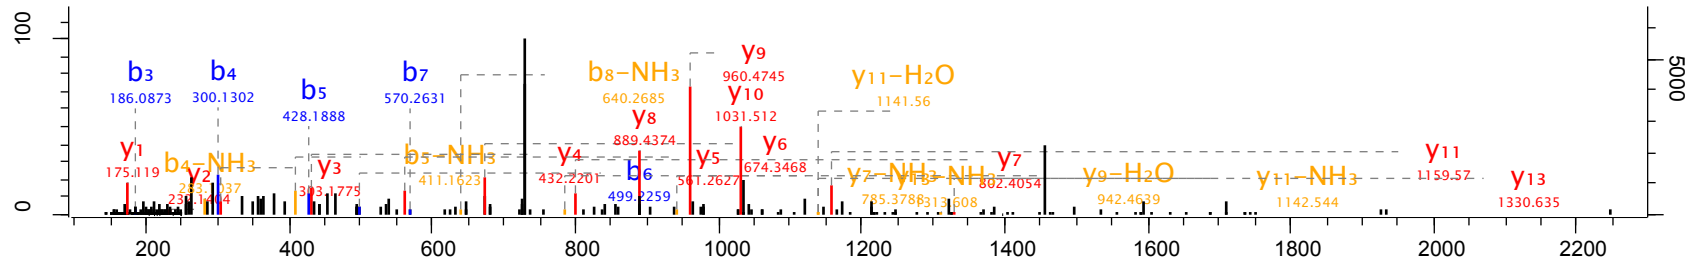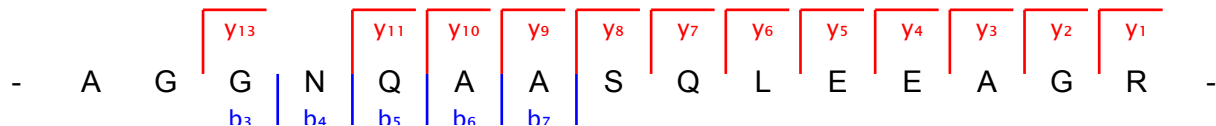

| Raw file                         | Scan  | Method   | Score | m/z    | Gene names |
|----------------------------------|-------|----------|-------|--------|------------|
| 20150226_Hela_Top_opt_A3_01_1593 | 15356 | TOF; CID | 71.45 | 451.26 | FAM186B    |

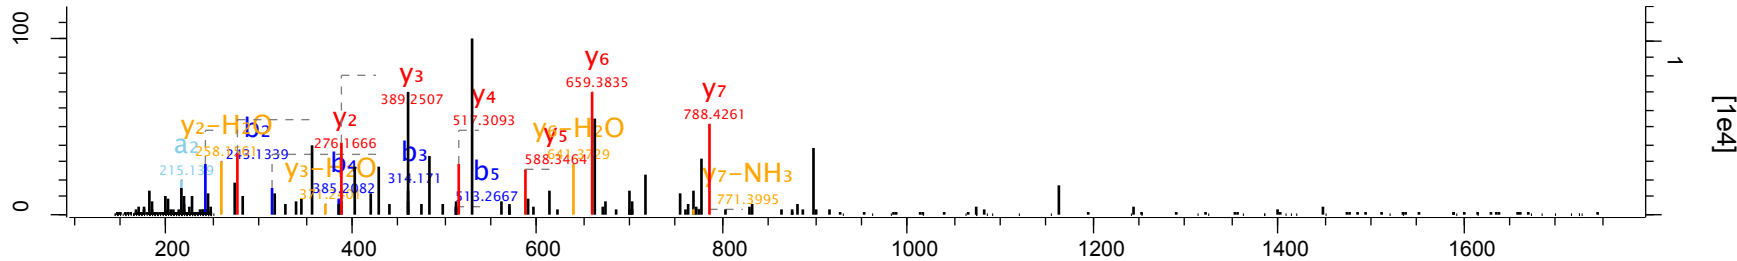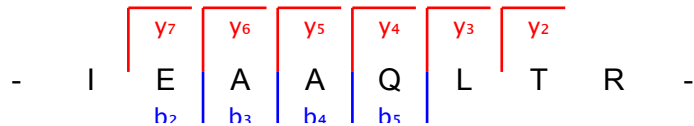

| Raw file                         | Scan  | Method   | Score | m/z    | Gene names |
|----------------------------------|-------|----------|-------|--------|------------|
| 20150226_Hela_Top_opt_A3_01_1593 | 15895 | TOF; CID | 60.69 | 647.77 | SUDS3      |

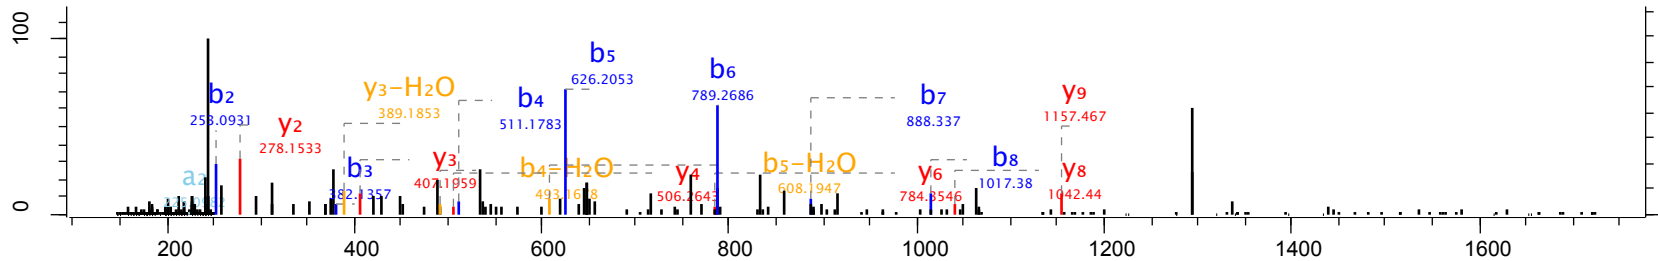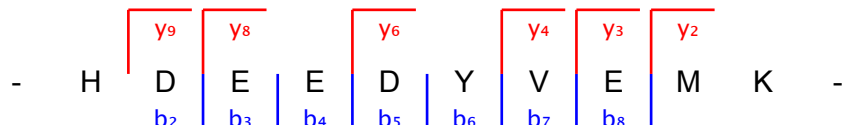

Raw file

20150226\_Hela\_Top\_opt\_A3\_01\_1593

Scan

15911

Method

TOF; CID

Score

93.24

m/z

512.29

Gene names

BLOC1S5;BLOC1S5-TXNDC5

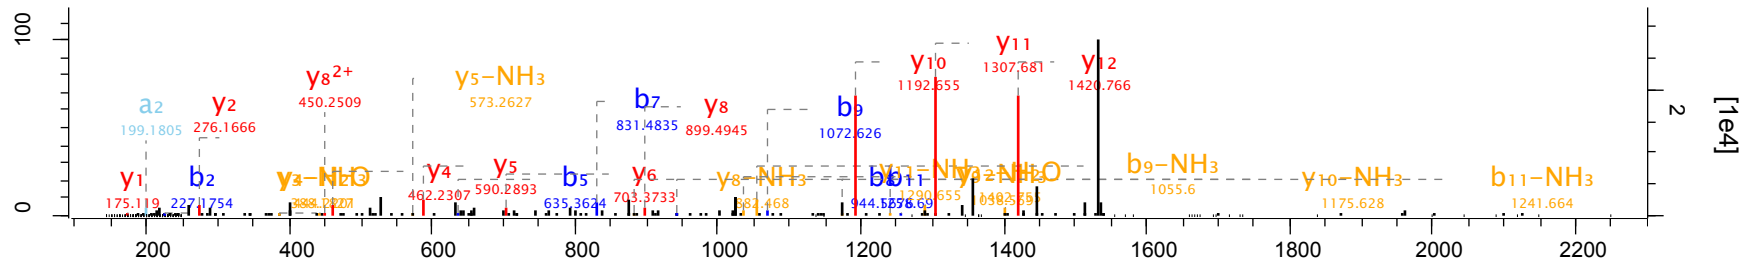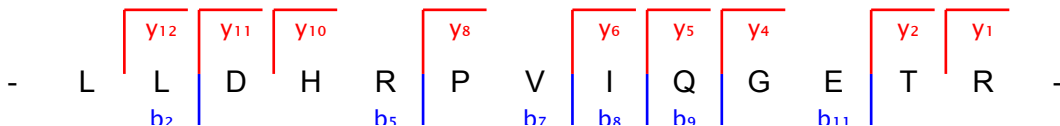

| Raw file                         | Scan  | Method   | Score | m/z   | Gene names |
|----------------------------------|-------|----------|-------|-------|------------|
| 20150226_Hela_Top_opt_A3_01_1593 | 16007 | TOF; CID | 81.95 | 514.3 | LENG1      |

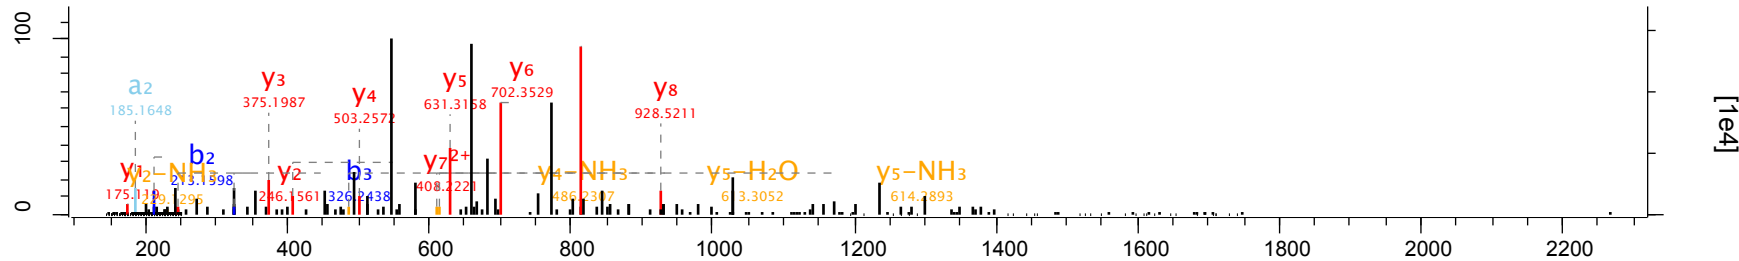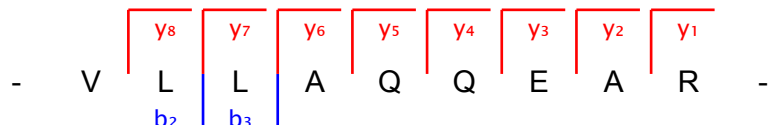

| Raw file                         | Scan  | Method   | Score | m/z    | Gene names |
|----------------------------------|-------|----------|-------|--------|------------|
| 20150226_Hela_Top_opt_A3_01_1593 | 17205 | TOF; CID | 56.26 | 519.27 | LRRK2      |

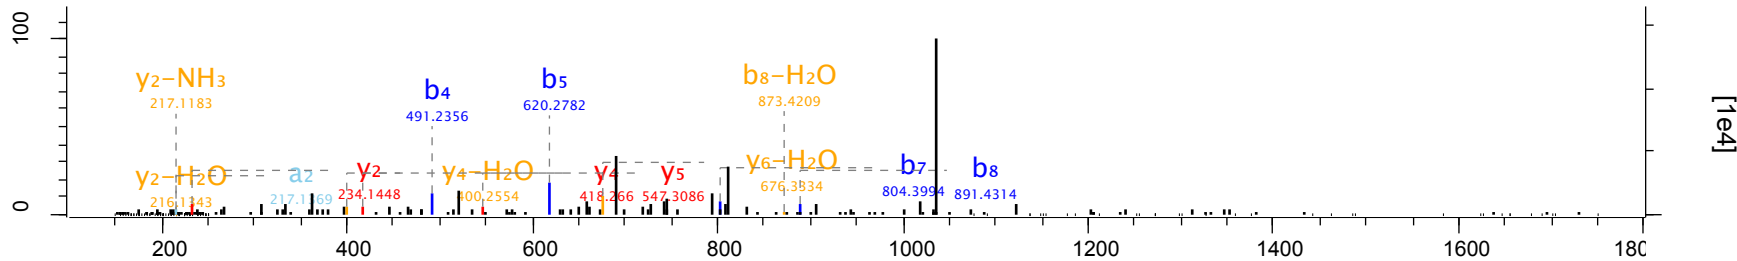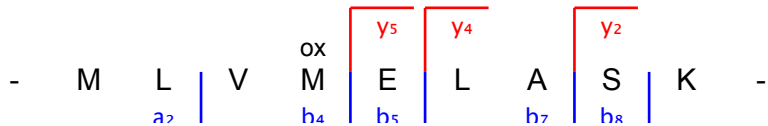

| Raw file                         | Scan  | Method   | Score | m/z    | Gene names |
|----------------------------------|-------|----------|-------|--------|------------|
| 20150226_Hela_Top_opt_A3_01_1593 | 17585 | TOF; CID | 51.94 | 720.32 | LEPROTL1   |

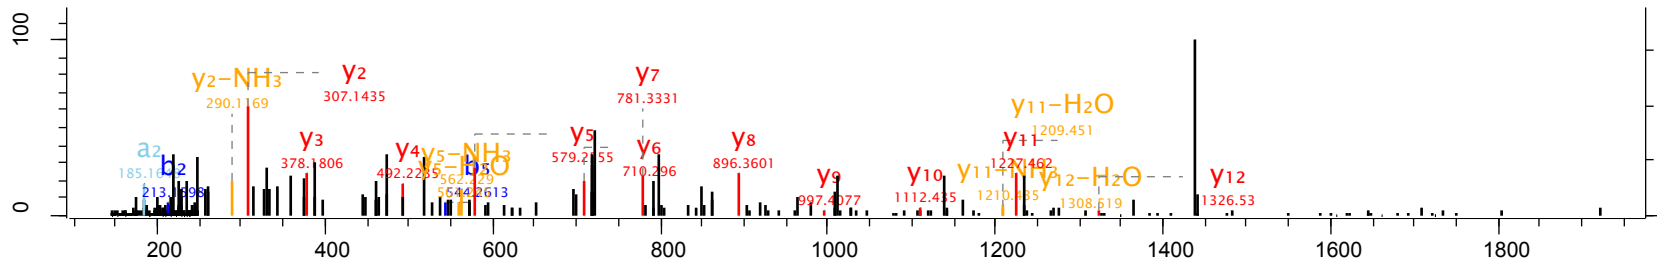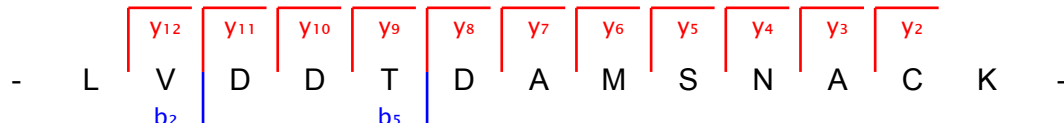



| Raw file                         | Scan  | Method   | Score | m/z    | Gene names |
|----------------------------------|-------|----------|-------|--------|------------|
| 20150226_Hela_Top_opt_A3_01_1593 | 17646 | TOF; CID | 91.81 | 798.36 | STX2       |

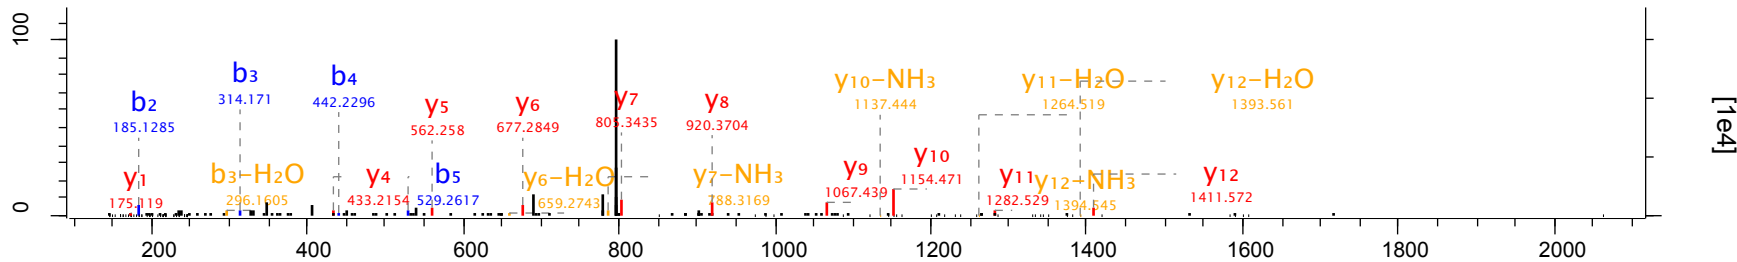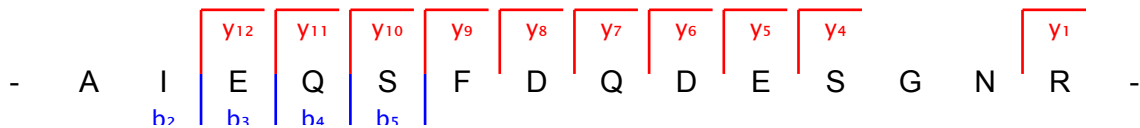

| Raw file                         | Scan  | Method   | Score | m/z    | Gene names |
|----------------------------------|-------|----------|-------|--------|------------|
| 20150226_Hela_Top_opt_A3_01_1593 | 17866 | TOF; CID | 65.84 | 538.29 | PTMS       |

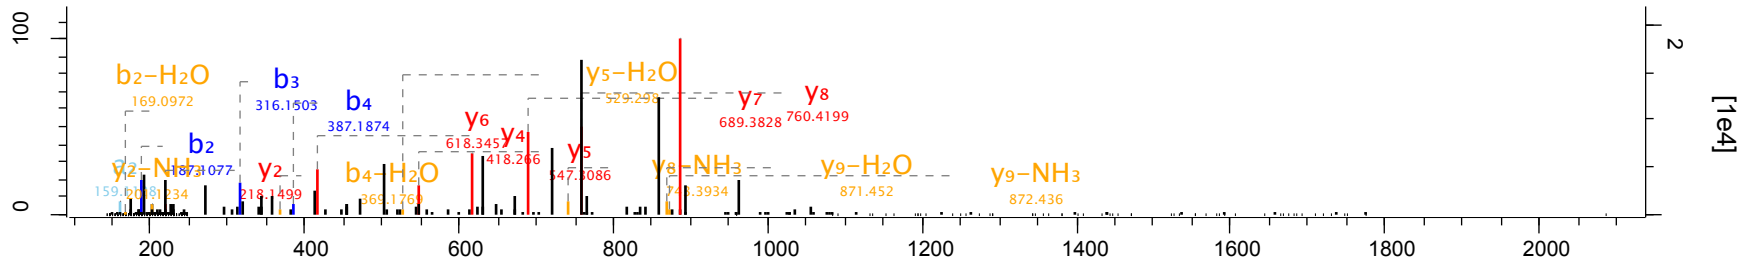

- S V E A A A E L S A K -

b<sub>2</sub> b<sub>3</sub> b<sub>4</sub>
y<sub>9</sub> y<sub>8</sub> y<sub>7</sub> y<sub>6</sub> y<sub>5</sub> y<sub>4</sub> y<sub>2</sub>

| Raw file                         | Scan  | Method   | Score | m/z    | Gene names |
|----------------------------------|-------|----------|-------|--------|------------|
| 20150226_Hela_Top_opt_A3_01_1593 | 18111 | TOF; CID | 55.45 | 682.97 | DNER       |

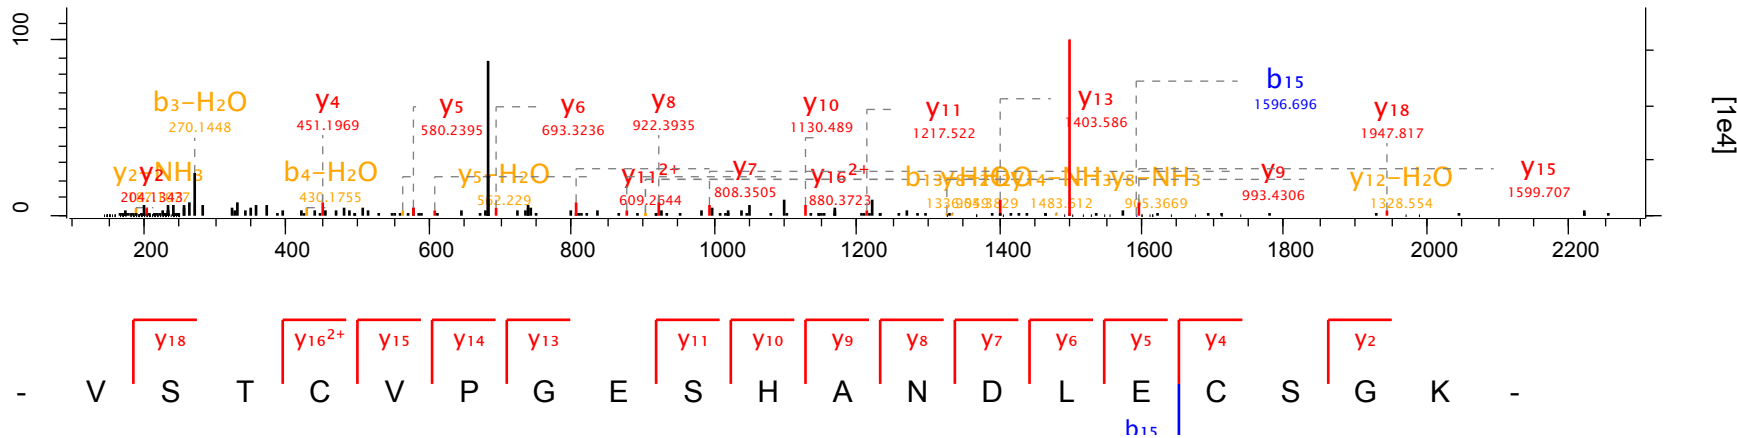

| Raw file                         | Scan  | Method   | Score  | m/z    | Gene names |
|----------------------------------|-------|----------|--------|--------|------------|
| 20150226_Hela_Top_opt_A3_01_1593 | 18921 | TOF; CID | 103.87 | 586.28 | TMEM126B   |

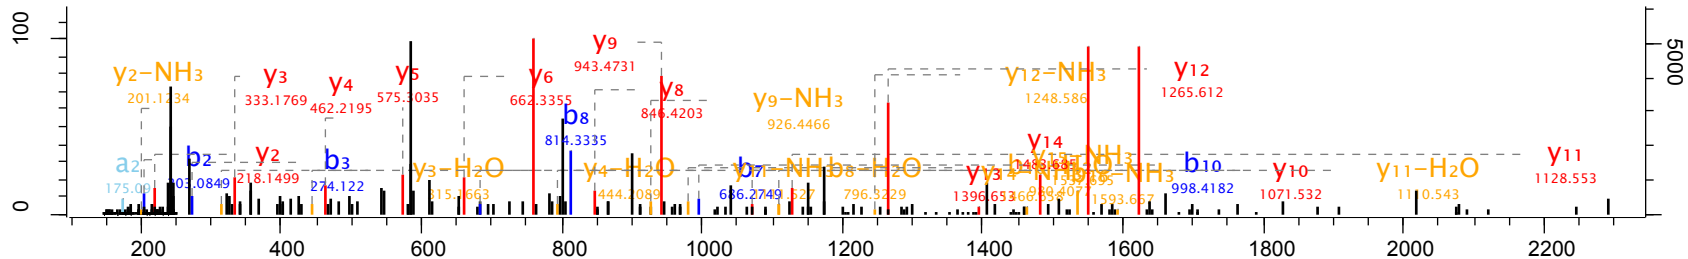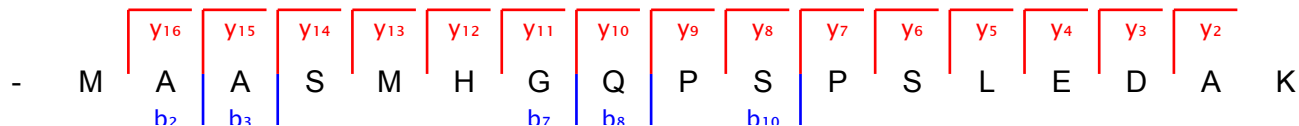

| Raw file                         | Scan  | Method   | Score | m/z    | Gene names |
|----------------------------------|-------|----------|-------|--------|------------|
| 20150226_Hela_Top_opt_A3_01_1593 | 19140 | TOF; CID | 55.78 | 762.38 | FAM129A    |

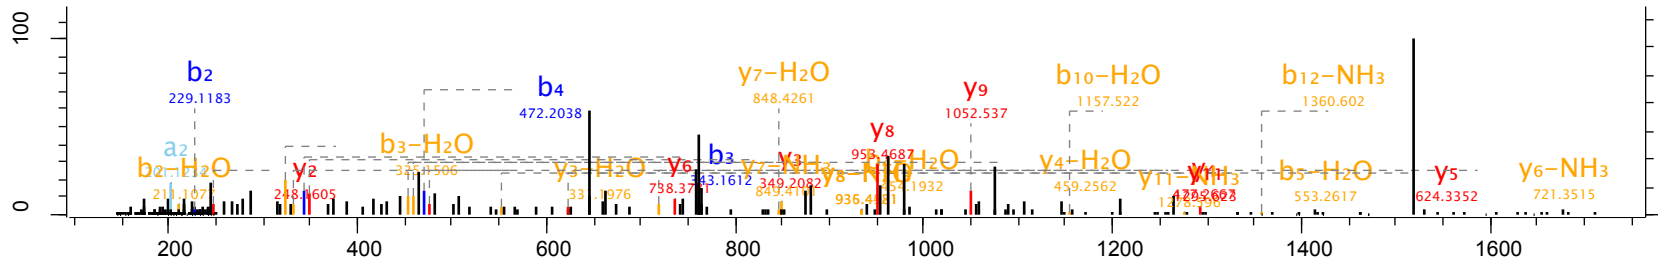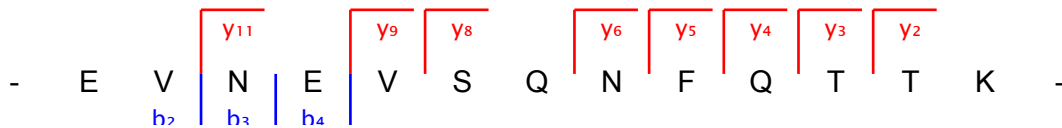

| Raw file                         | Scan  | Method   | Score | m/z   | Gene names |
|----------------------------------|-------|----------|-------|-------|------------|
| 20150226_Hela_Top_opt_A3_01_1593 | 19607 | TOF; CID | 81.53 | 587.6 | TIMM10B    |

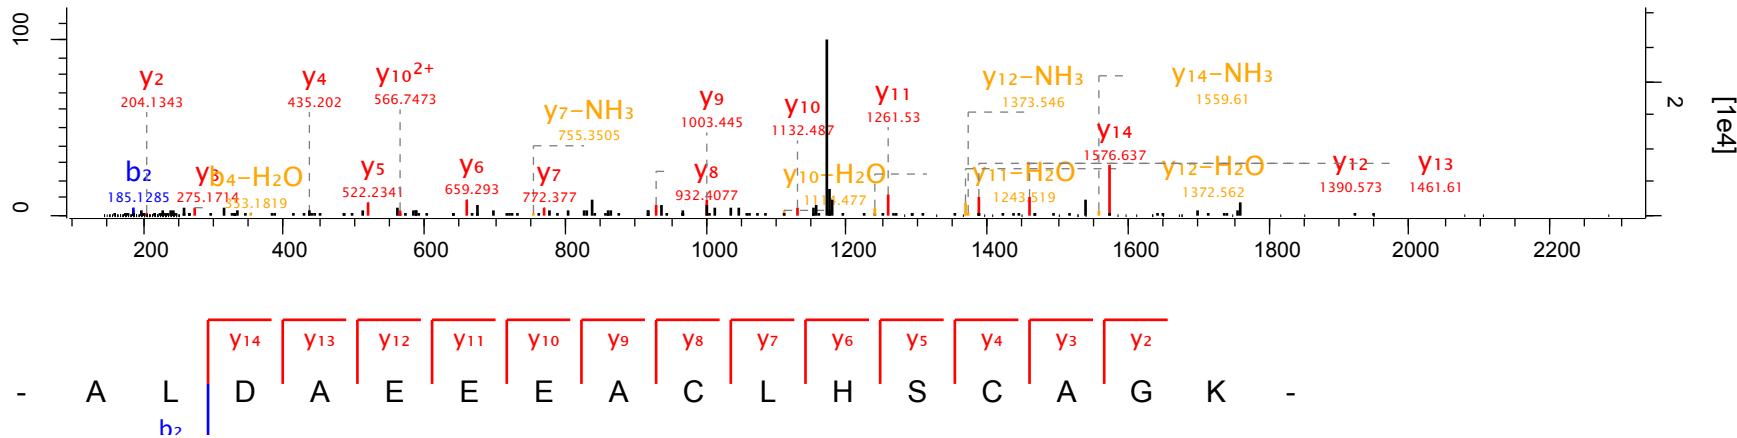

| Raw file                         | Scan  | Method   | Score | m/z    | Gene names |
|----------------------------------|-------|----------|-------|--------|------------|
| 20150226_Hela_Top_opt_A3_01_1593 | 20634 | TOF; CID | 45.65 | 588.79 | RBCK1      |

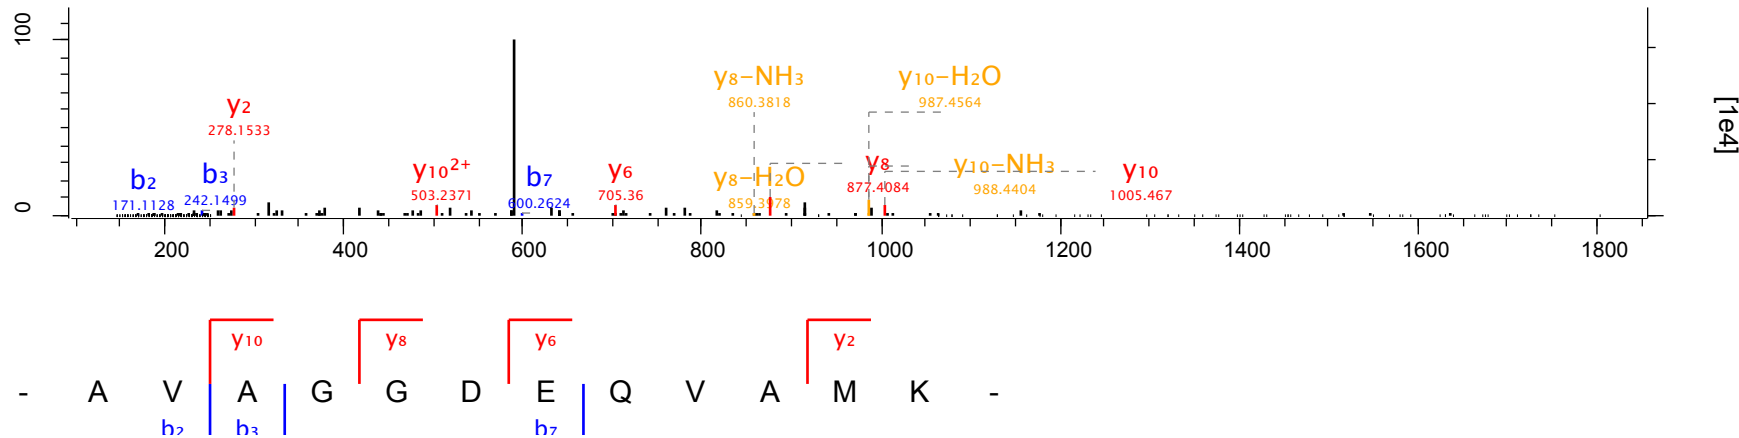

| Raw file                         | Scan  | Method   | Score | m/z    | Gene names |
|----------------------------------|-------|----------|-------|--------|------------|
| 20150226_Hela_Top_opt_A3_01_1593 | 20994 | TOF; CID | 57.17 | 707.78 | LGMN       |

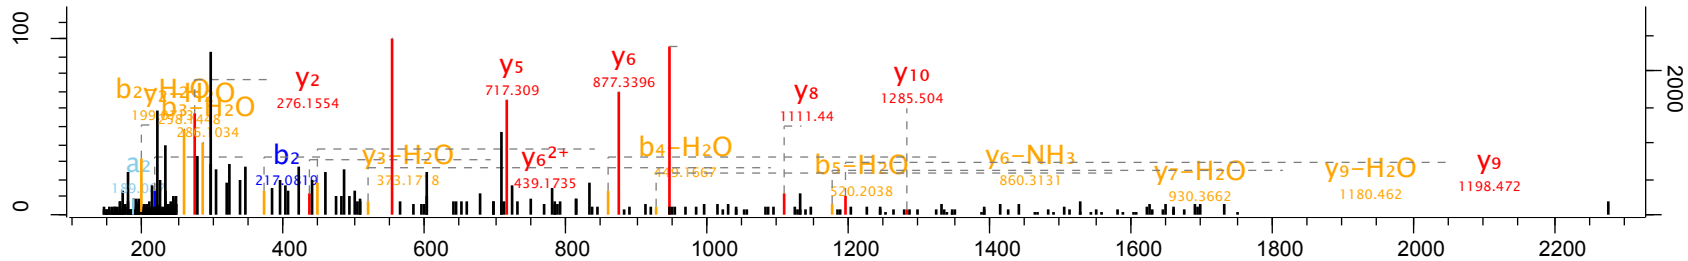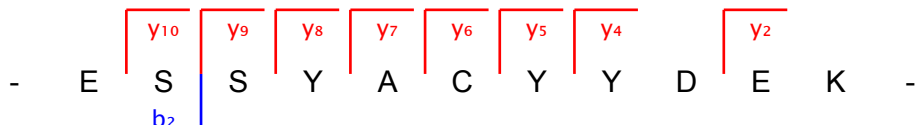



| Raw file                         | Scan  | Method   | Score | m/z    | Gene names |
|----------------------------------|-------|----------|-------|--------|------------|
| 20150226_Hela_Top_opt_A3_01_1593 | 21090 | TOF; CID | 54.4  | 460.57 | FAM20B     |

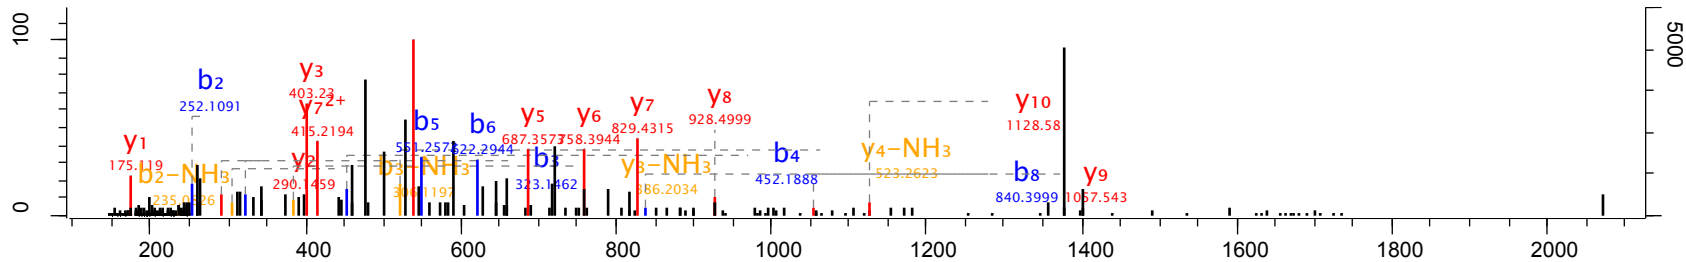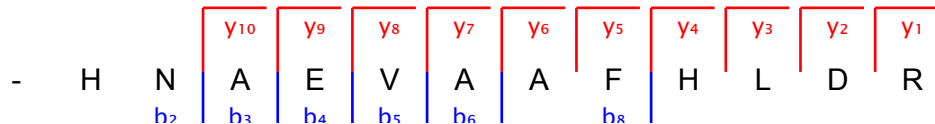

| Raw file                         | Scan  | Method   | Score  | m/z   | Gene names |
|----------------------------------|-------|----------|--------|-------|------------|
| 20150226_Hela_Top_opt_A3_01_1593 | 21295 | TOF; CID | 103.83 | 779.4 | OIP5       |

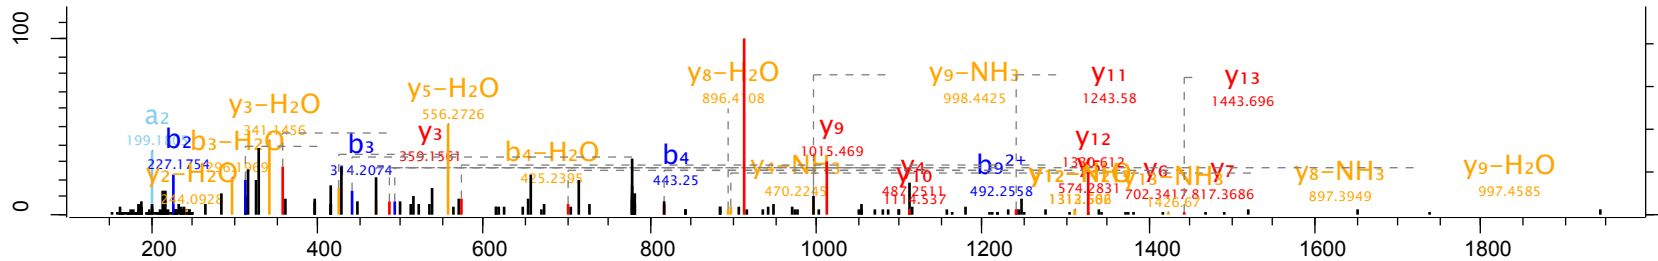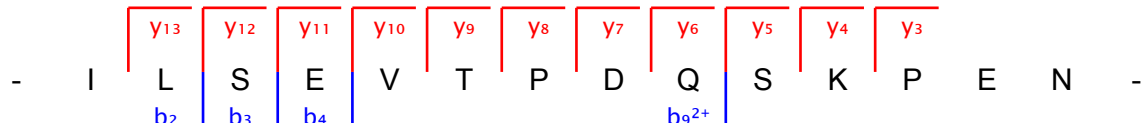

Raw file

20150226\_Hela\_Top\_opt\_A3\_01\_1593

Scan

21860

Method

TOF; CID

Score

51.25

m/z

609.81

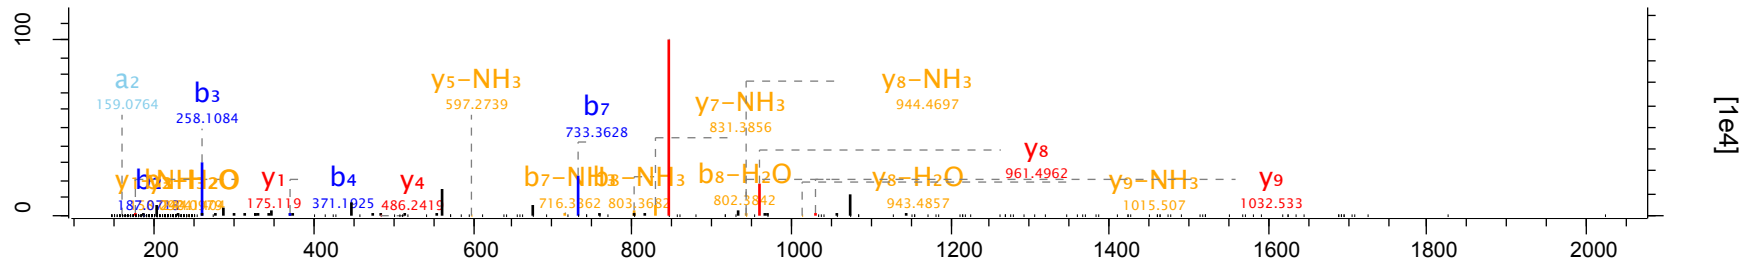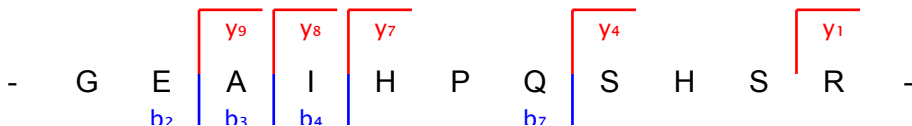

[1e4]

| Raw file                         | Scan  | Method   | Score  | m/z    | Gene names |
|----------------------------------|-------|----------|--------|--------|------------|
| 20150226_Hela_Top_opt_A3_01_1593 | 23662 | TOF; CID | 104.76 | 411.26 | TRMT2B     |

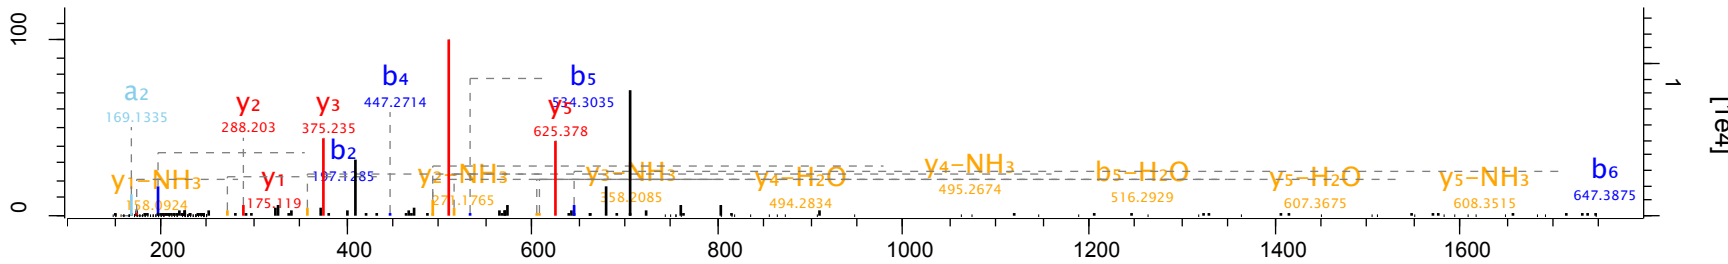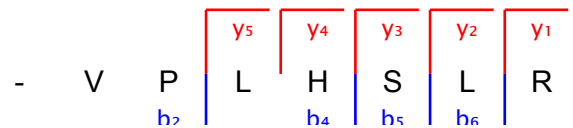

| Raw file                         | Scan  | Method   | Score | m/z    | Gene names |
|----------------------------------|-------|----------|-------|--------|------------|
| 20150226_Hela_Top_opt_A3_01_1593 | 24096 | TOF; CID | 83.5  | 595.26 | PPAP2C     |

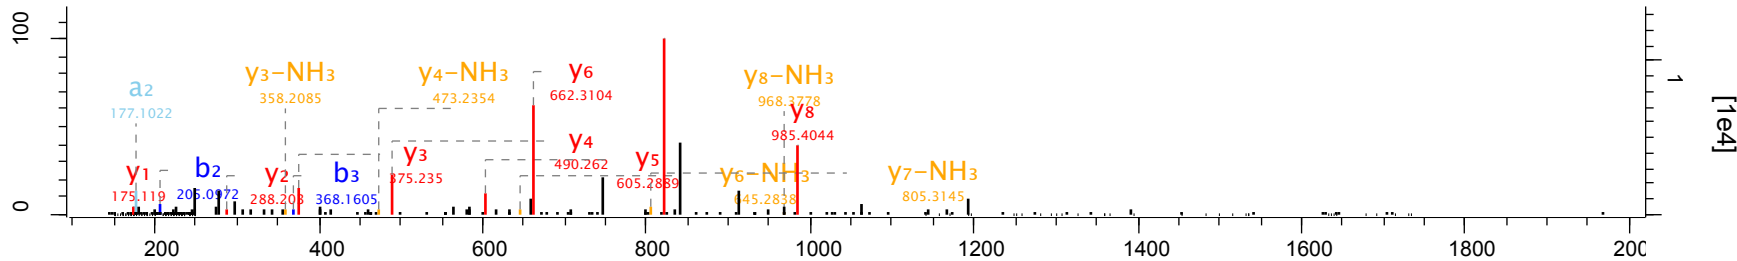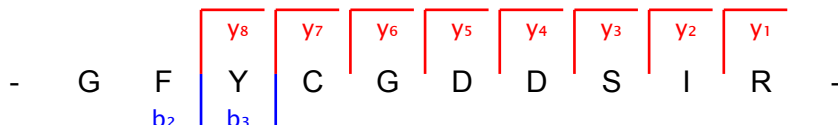

| Raw file                         | Scan  | Method   | Score | m/z   | Gene names |
|----------------------------------|-------|----------|-------|-------|------------|
| 20150226_Hela_Top_opt_A3_01_1593 | 24251 | TOF; CID | 73.5  | 796.4 | ST3GAL4    |

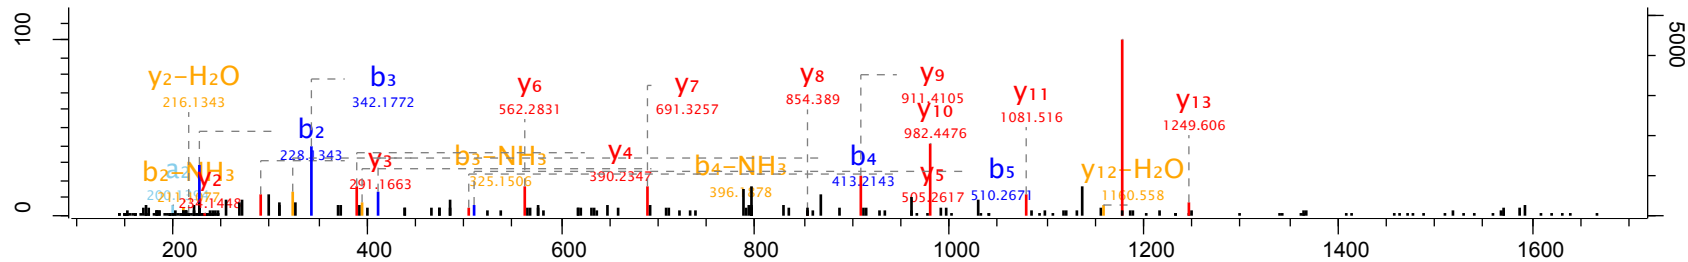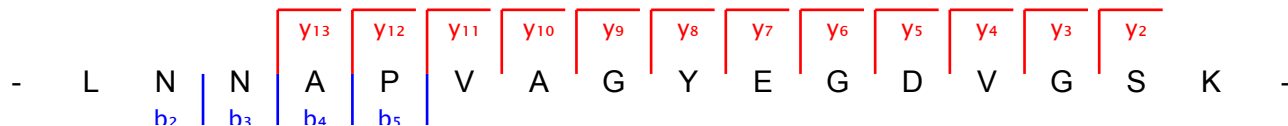

| Raw file                         | Scan  | Method   | Score | m/z    | Gene names |
|----------------------------------|-------|----------|-------|--------|------------|
| 20150226_Hela_Top_opt_A3_01_1593 | 24772 | TOF; CID | 111.7 | 844.41 | ELMSAN1    |

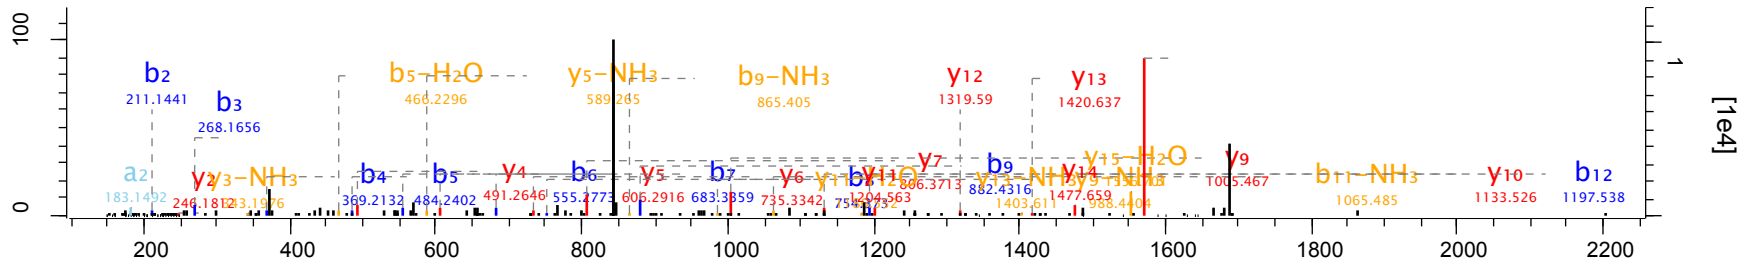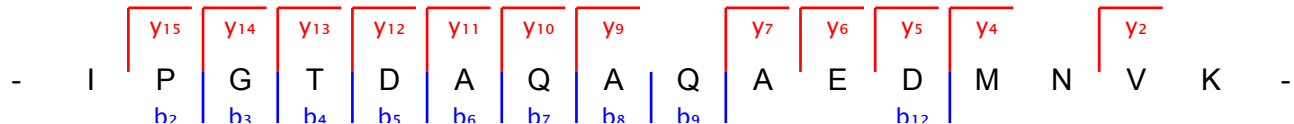

| Raw file                         | Scan  | Method   | Score | m/z    | Gene names |
|----------------------------------|-------|----------|-------|--------|------------|
| 20150226_Hela_Top_opt_A3_01_1593 | 25198 | TOF; CID | 91.63 | 401.24 | MEAF6      |

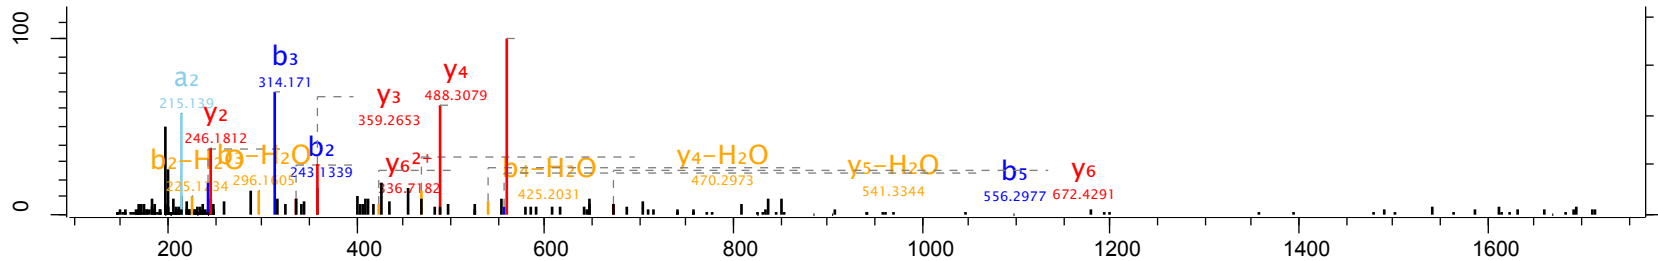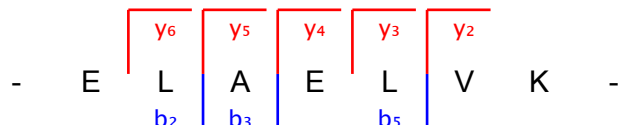



Raw file

20150226\_Hela\_Top\_opt\_A3\_01\_1593

Scan

26653

Method

TOF; CID

Score

74.39

m/z

711.32

Gene names

CETN3

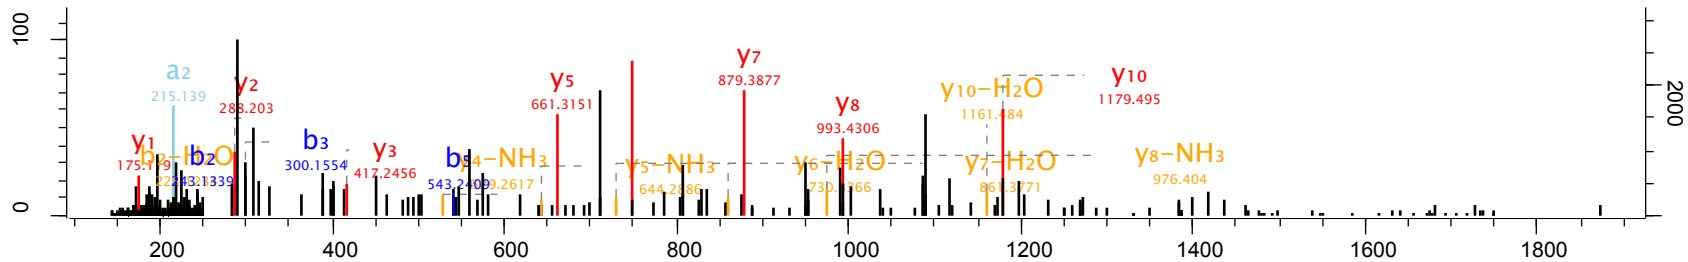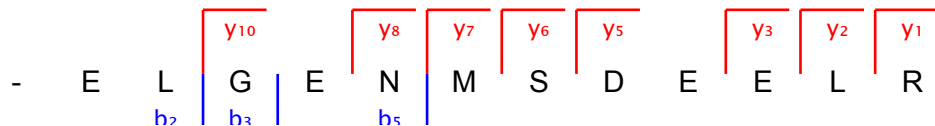

| Raw file                         | Scan  | Method   | Score  | m/z    | Gene names |
|----------------------------------|-------|----------|--------|--------|------------|
| 20150226_Hela_Top_opt_A3_01_1593 | 27017 | TOF; CID | 106.57 | 876.45 | ZBTB21     |

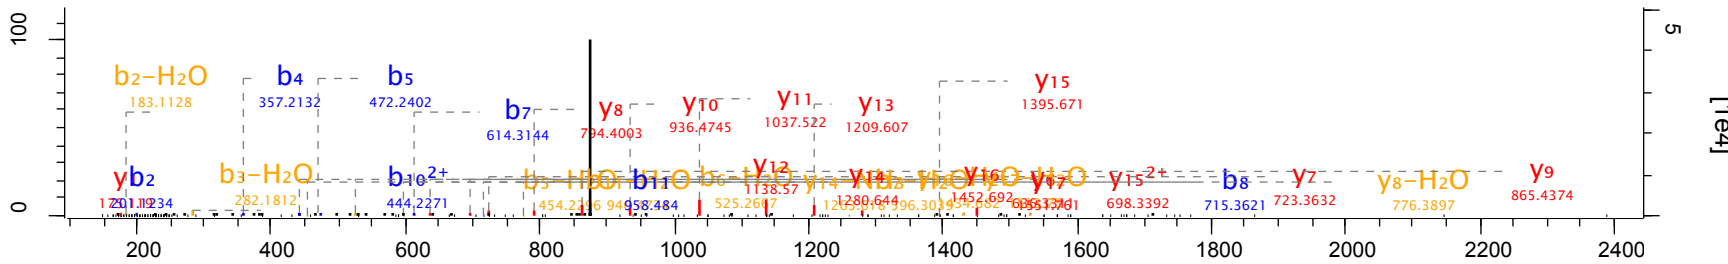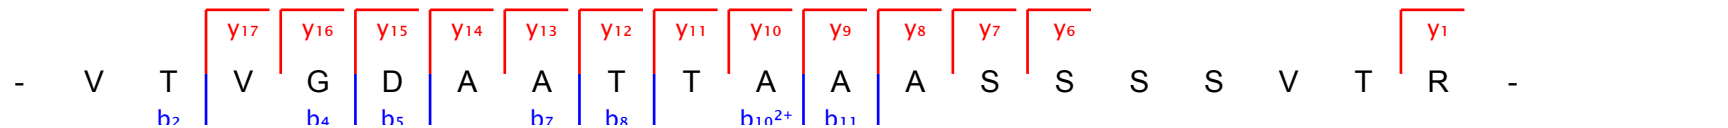

| Raw file                         | Scan  | Method   | Score | m/z    | Gene names |
|----------------------------------|-------|----------|-------|--------|------------|
| 20150226_Hela_Top_opt_A3_01_1593 | 27510 | TOF; CID | 57.17 | 687.84 | INSL4      |

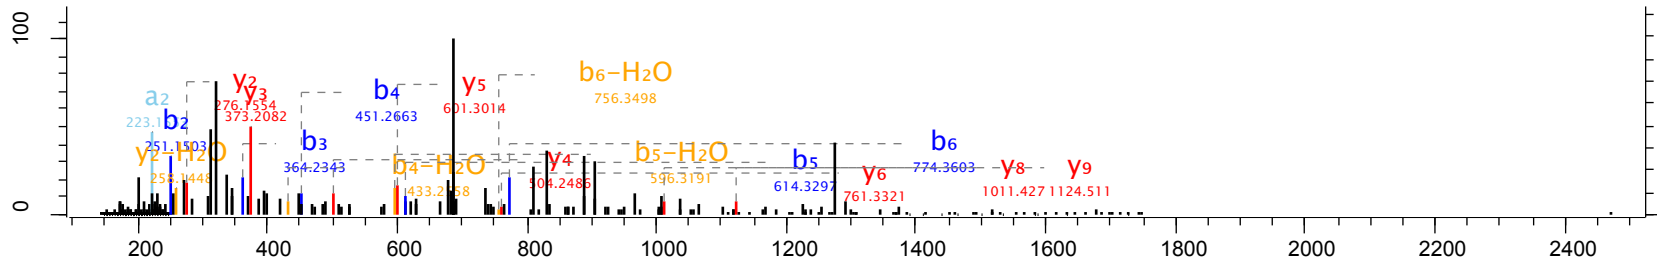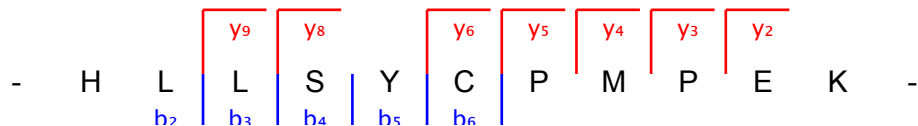

Raw file

20150226\_Hela\_Top\_opt\_A3\_01\_1593

Scan

27814

Method

TOF; CID

Score

41.11

m/z

730.37

Gene names

PLCD3

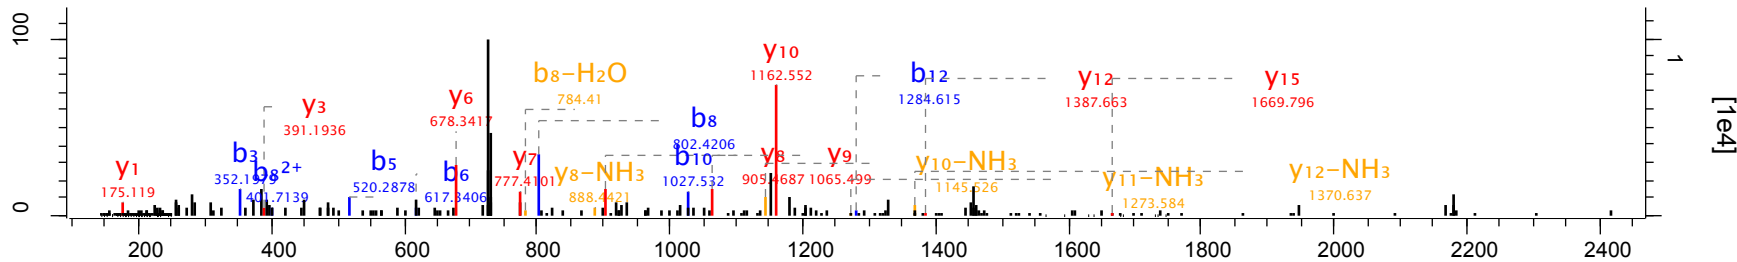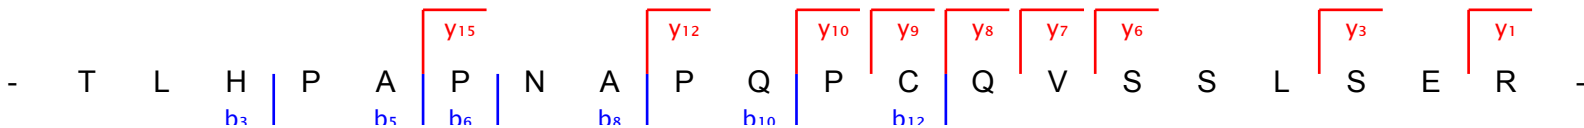

| Raw file                         | Scan  | Method   | Score | m/z   | Gene names |
|----------------------------------|-------|----------|-------|-------|------------|
| 20150226_Hela_Top_opt_A3_01_1593 | 29177 | TOF; CID | 86.67 | 556.8 | SFXN2      |

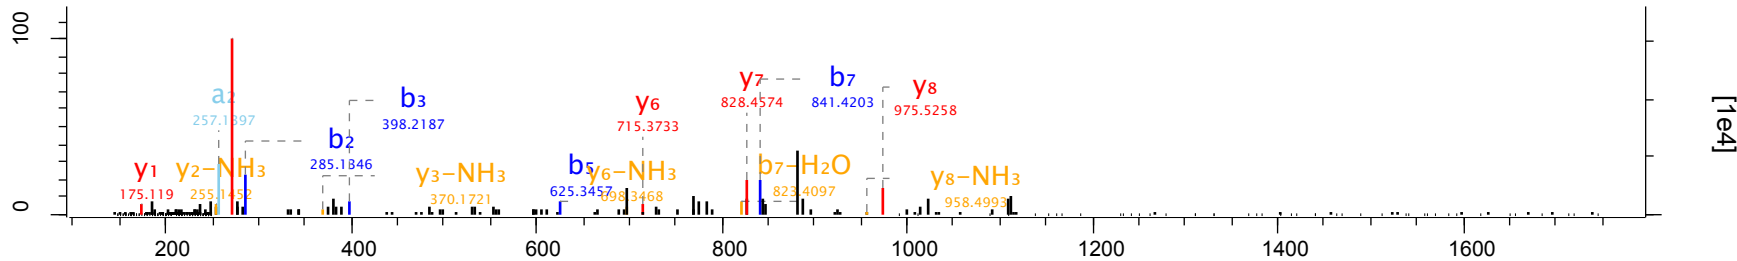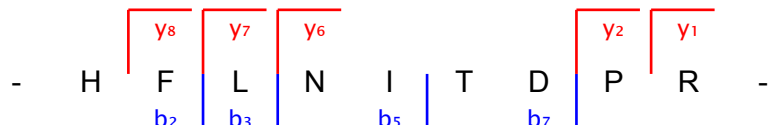

| Raw file                         | Scan  | Method   | Score | m/z    | Gene names |
|----------------------------------|-------|----------|-------|--------|------------|
| 20150226_Hela_Top_opt_A3_01_1593 | 29183 | TOF; CID | 84.38 | 888.46 | NDUFV3     |

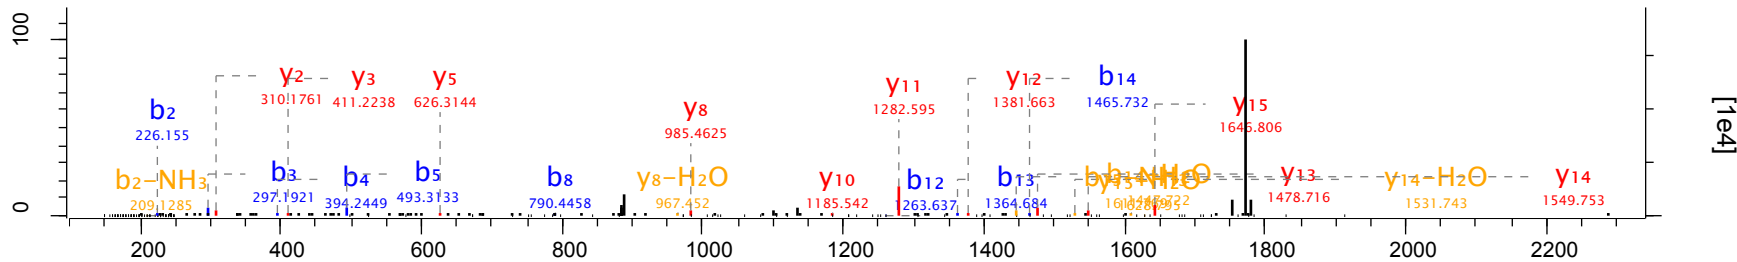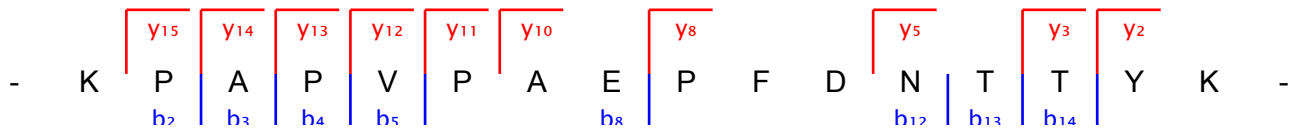

| Raw file                         | Scan  | Method   | Score | m/z    | Gene names |
|----------------------------------|-------|----------|-------|--------|------------|
| 20150226_Hela_Top_opt_A3_01_1593 | 30871 | TOF; CID | 60.33 | 645.33 | CRCP       |

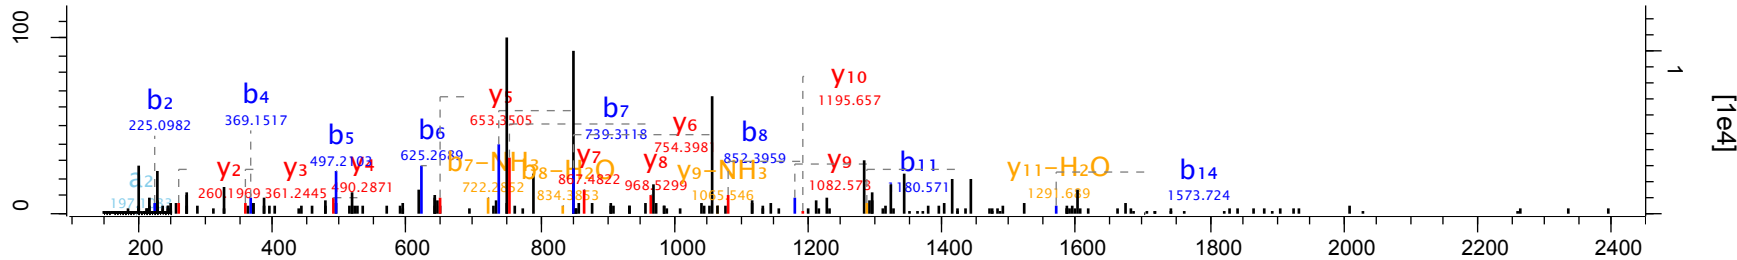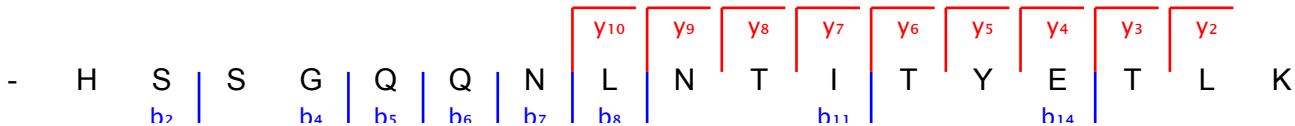

| Raw file                         | Scan  | Method   | Score | m/z    | Gene names |
|----------------------------------|-------|----------|-------|--------|------------|
| 20150226_Hela_Top_opt_A3_01_1593 | 32146 | TOF; CID | 58.32 | 704.38 | ARHGAP18   |

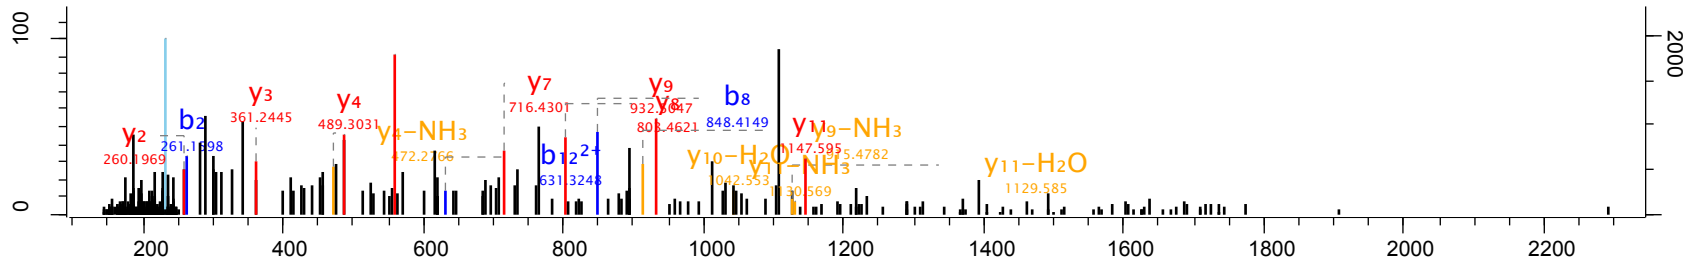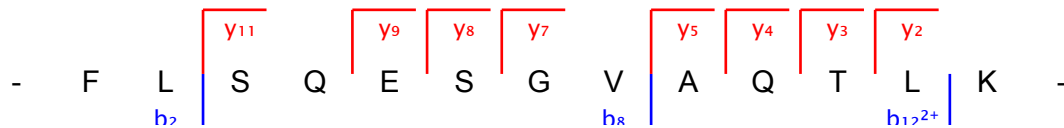



| Raw file                         | Scan  | Method   | Score | m/z    | Gene names |
|----------------------------------|-------|----------|-------|--------|------------|
| 20150226_Hela_Top_opt_A3_01_1593 | 32331 | TOF; CID | 54.77 | 646.36 | BRD7       |

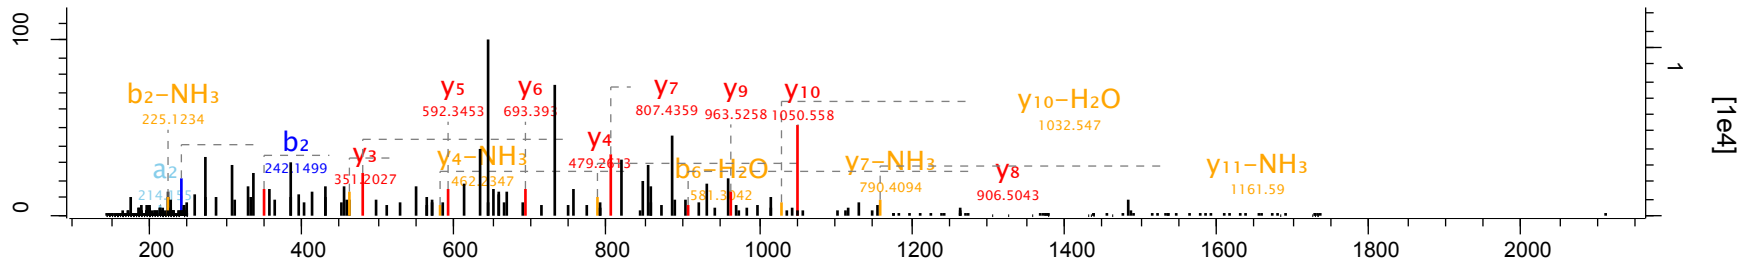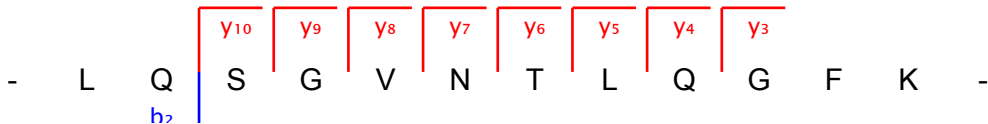

| Raw file                         | Scan  | Method   | Score | m/z | Gene names |
|----------------------------------|-------|----------|-------|-----|------------|
| 20150226_Hela_Top_opt_A3_01_1593 | 32440 | TOF; CID | 51.77 | 596 | DUS2       |

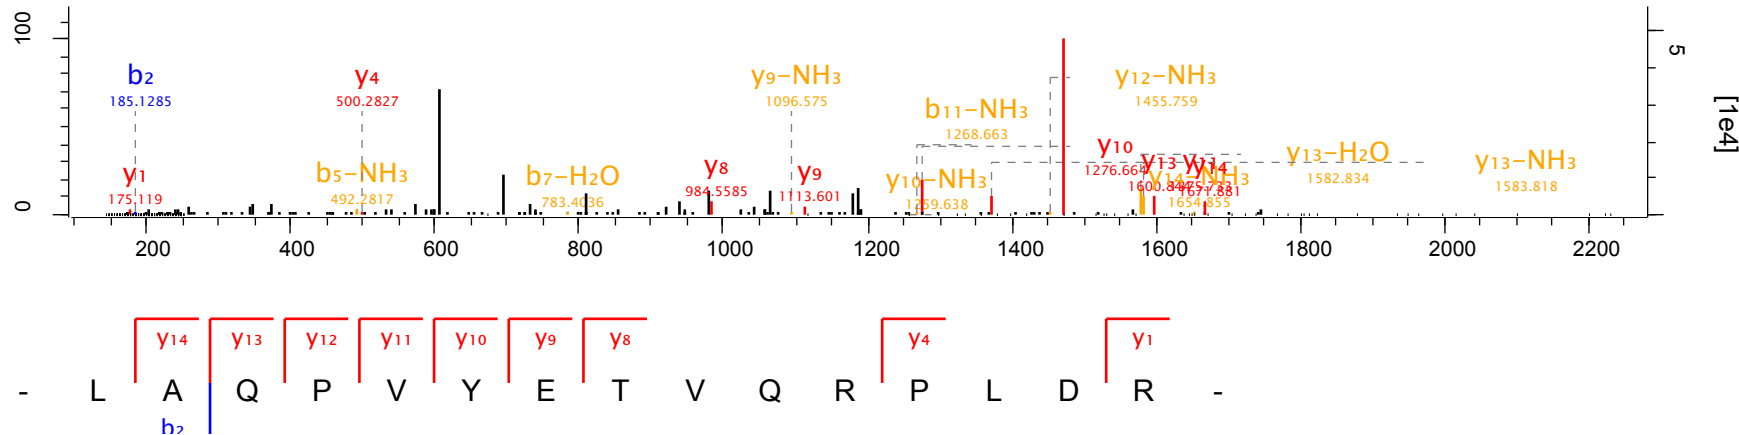

| Raw file                         | Scan  | Method   | Score | m/z    | Gene names |
|----------------------------------|-------|----------|-------|--------|------------|
| 20150226_Hela_Top_opt_A3_01_1593 | 32741 | TOF; CID | 53.59 | 705.36 | TMEM69     |

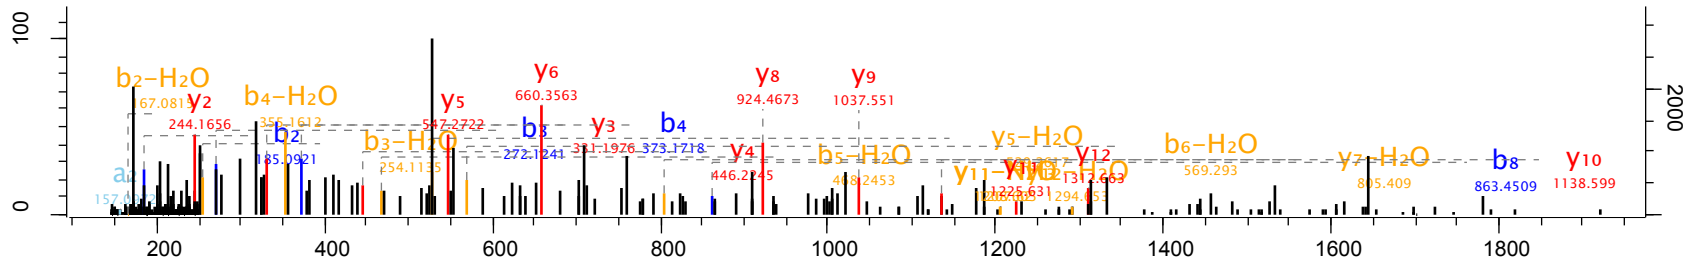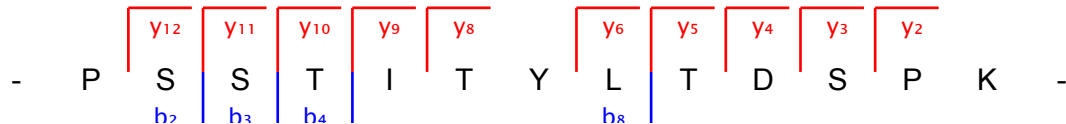

| Raw file                         | Scan  | Method   | Score | m/z    | Gene names |
|----------------------------------|-------|----------|-------|--------|------------|
| 20150226_Hela_Top_opt_A3_01_1593 | 32853 | TOF; CID | 90.41 | 746.36 | KIF3A      |

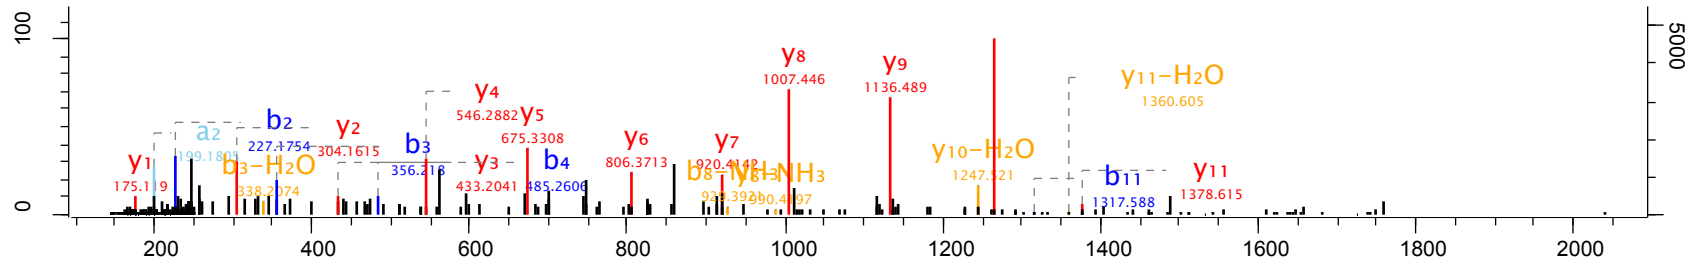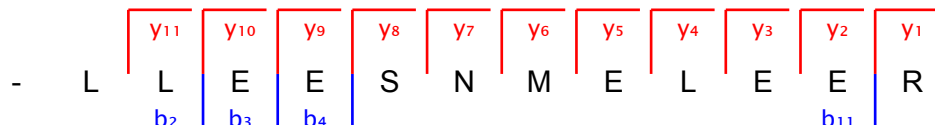

Raw file

20150226\_Hela\_Top\_opt\_A3\_01\_1593

Scan

33119

Method

TOF; CID

Score

103.4

m/z

818.4

Gene names

CEP250

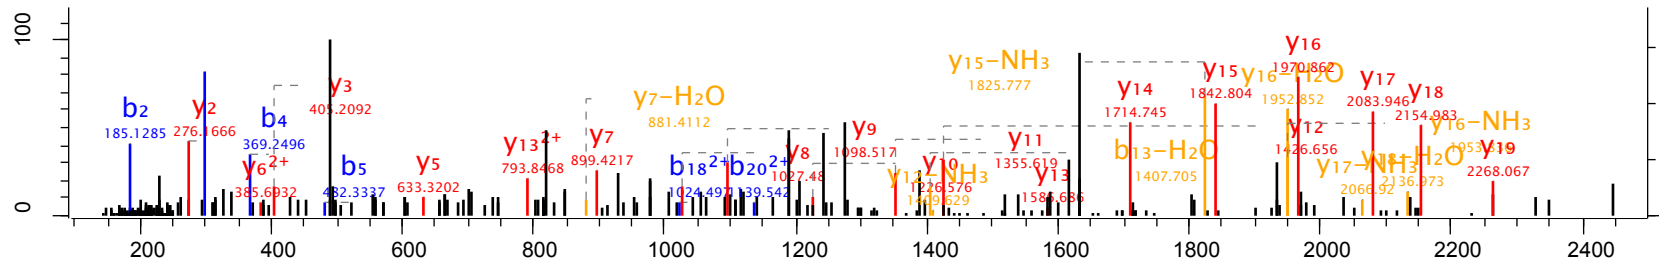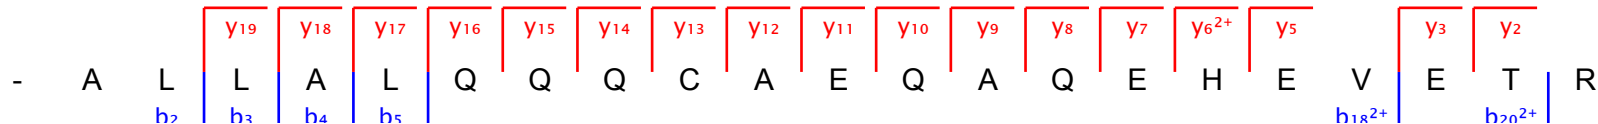

Raw file

20150226\_Hela\_Top\_opt\_A3\_01\_1593

Scan

33295

Method

TOF; CID

Score

143.43

m/z

933.45

Gene names

ROMO1

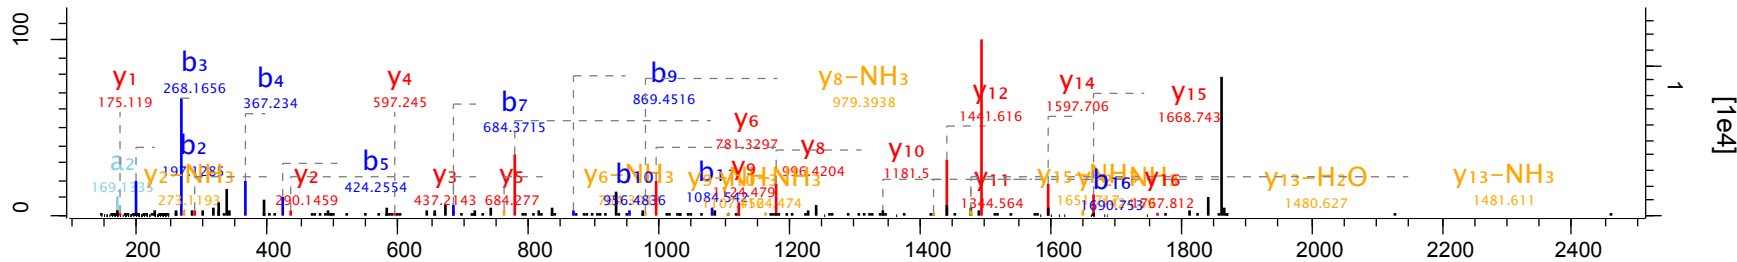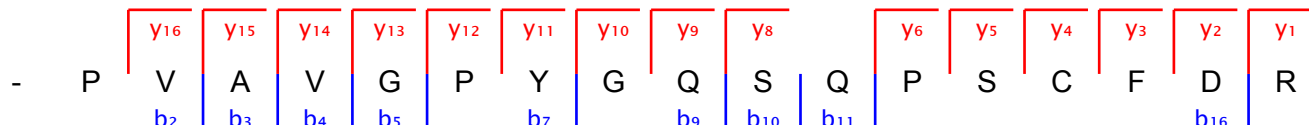

Raw file

Scan

Method

Score

m/z

Gene names

20150226\_Hela\_Top\_opt\_A3\_01\_1593

33520

TOF; CID

116.28

834.42

SLC7A6

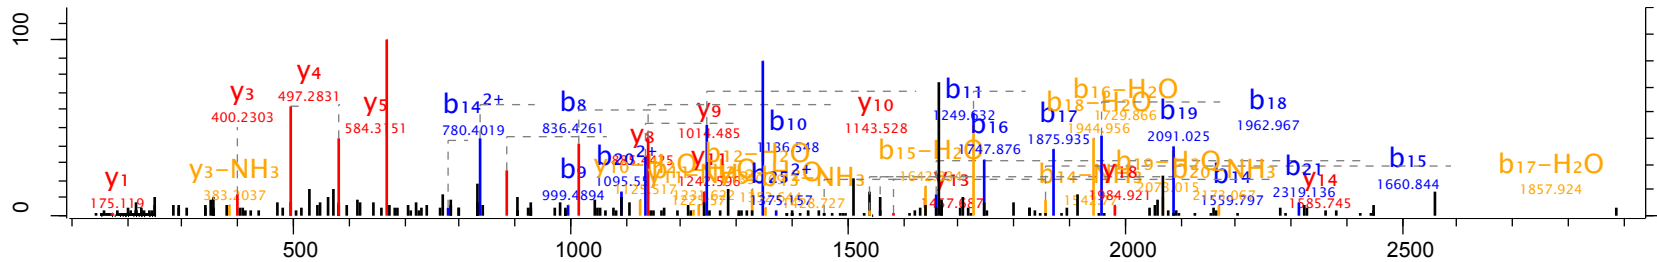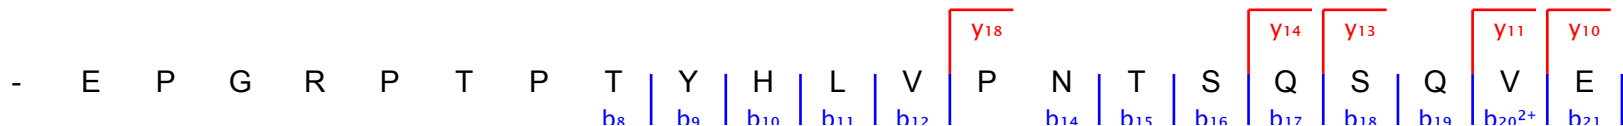

Raw file

20150226\_Hela\_Top\_opt\_A3\_01\_1593

Scan

33731

Method

TOF; CID

Score

110.08

m/z

665.36

Gene names

GDAP1

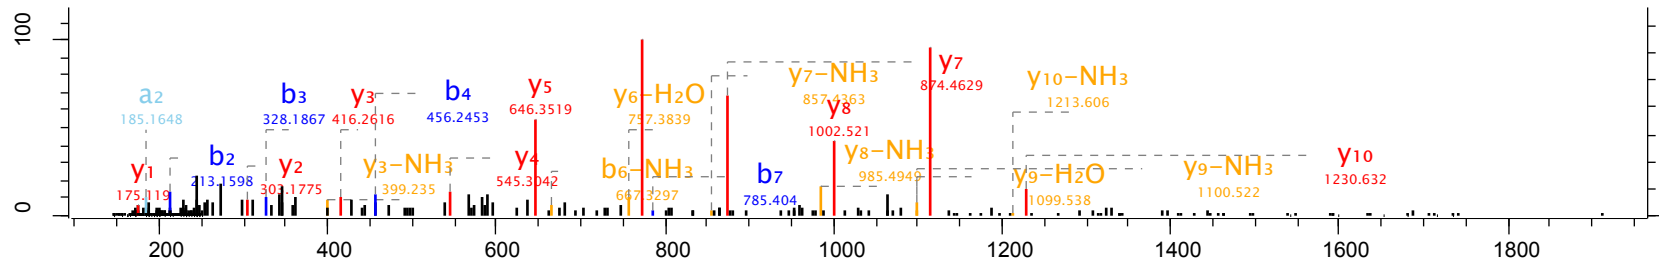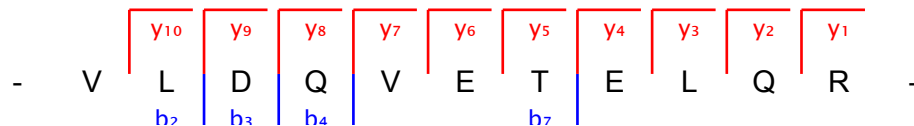



Raw file

20150226\_Hela\_Top\_opt\_A3\_01\_1593

Scan

33950

Method

TOF; CID

Score

54.78

m/z

537.32

Gene names

UBIAD1

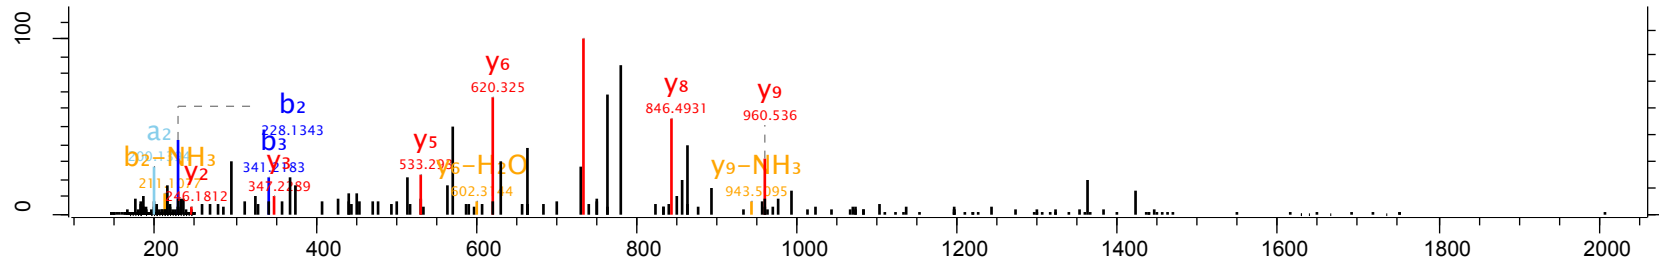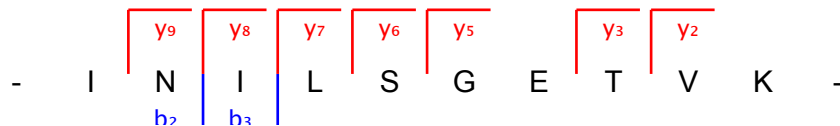

| Raw file                         | Scan  | Method   | Score | m/z    | Gene names |
|----------------------------------|-------|----------|-------|--------|------------|
| 20150226_Hela_Top_opt_A3_01_1593 | 34401 | TOF; CID | 65.18 | 675.34 | TBC1D24    |

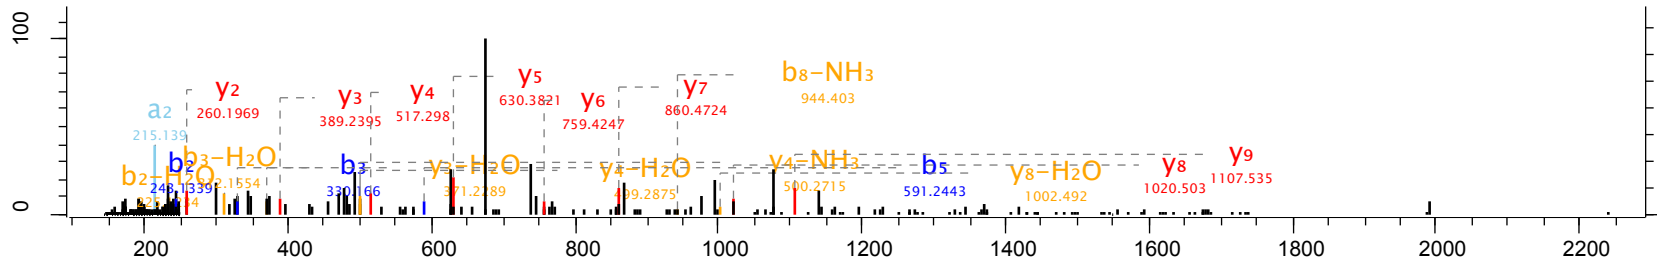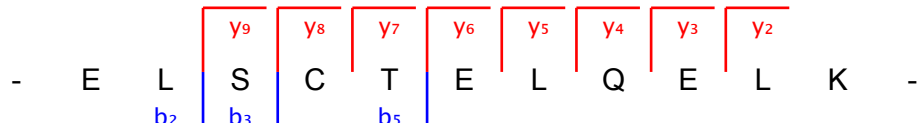

| Raw file                         | Scan  | Method   | Score | m/z    | Gene names        |
|----------------------------------|-------|----------|-------|--------|-------------------|
| 20150226_Hela_Top_opt_A3_01_1593 | 34650 | TOF; CID | 77.12 | 687.85 | FOXL2;FOXF1;FOXF2 |

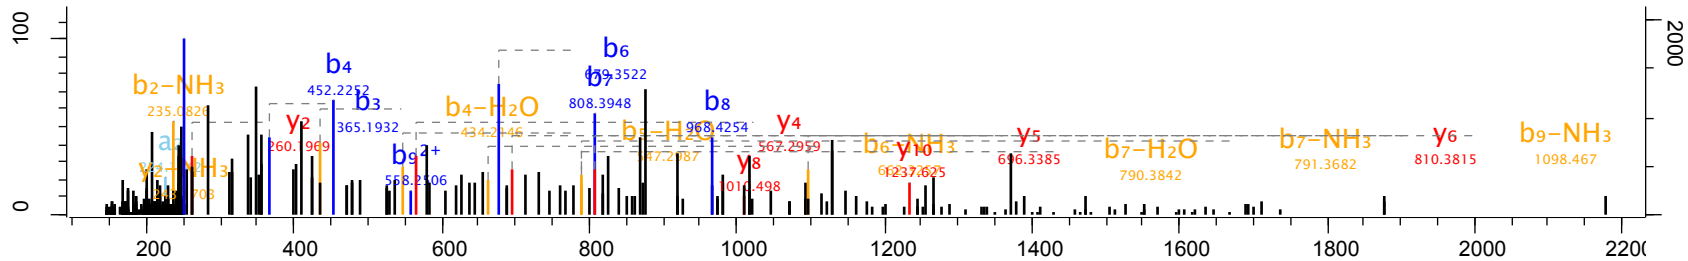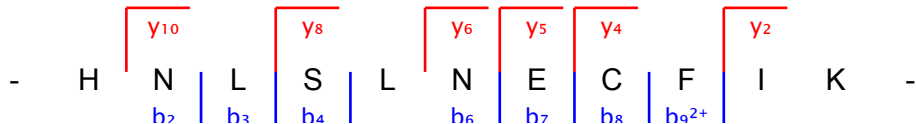

Raw file

20150226\_Hela\_Top\_opt\_A3\_01\_1593

Scan

34773

Method

TOF; CID

Score

115.57

m/z

610.31

Gene names

SLC27A1

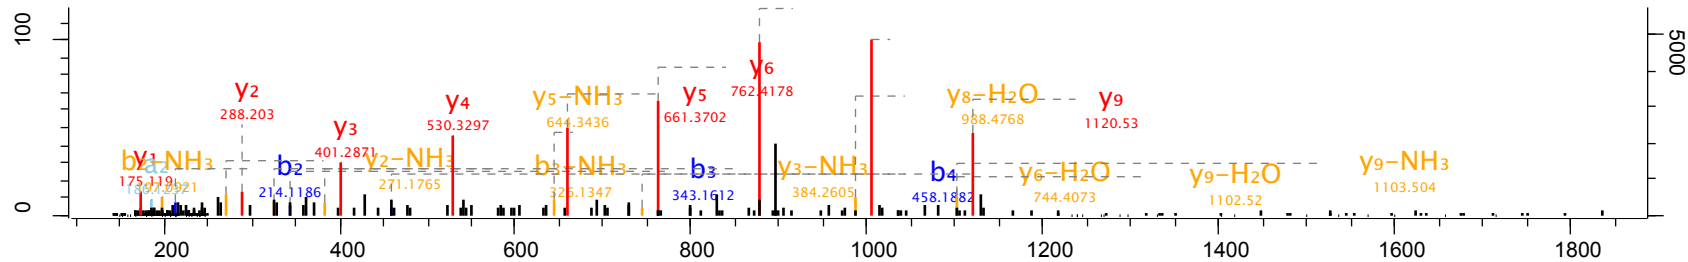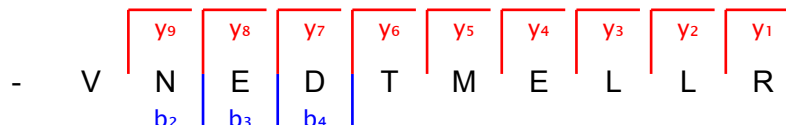

Raw file

20150226\_Hela\_Top\_opt\_A3\_01\_1593

Scan

34884

Method

TOF; CID

Score

83.76

m/z

751.35

Gene names

POLR2K

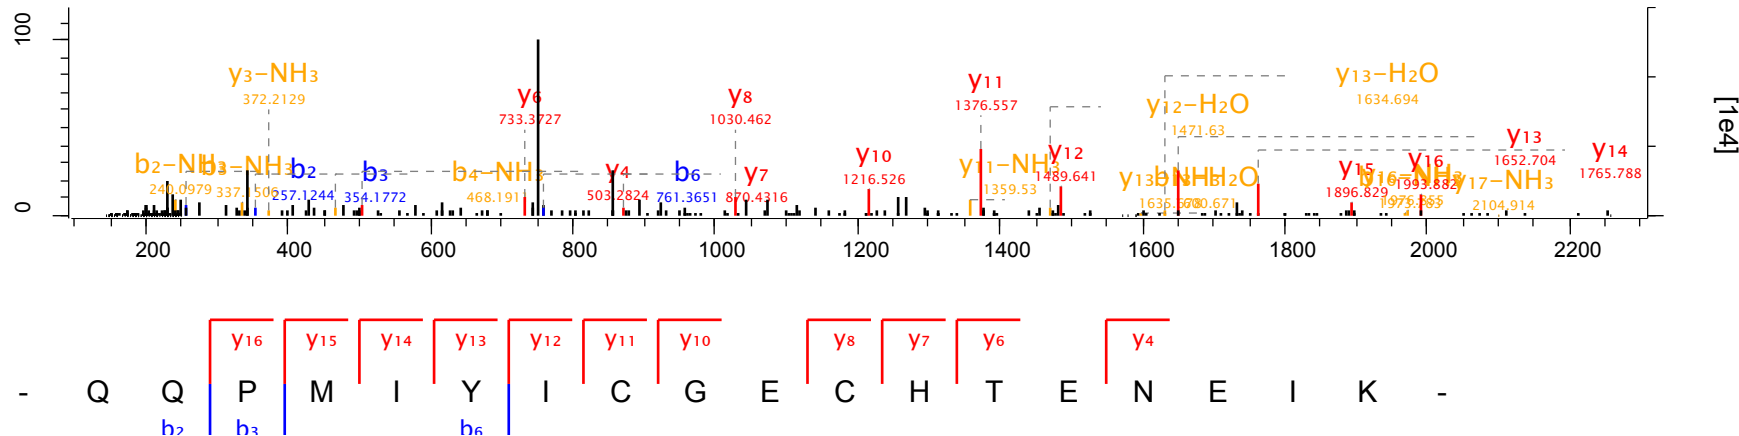

| Raw file                         | Scan  | Method   | Score | m/z    | Gene names |
|----------------------------------|-------|----------|-------|--------|------------|
| 20150226_Hela_Top_opt_A3_01_1593 | 34938 | TOF; CID | 53.57 | 712.32 | ZNF330     |

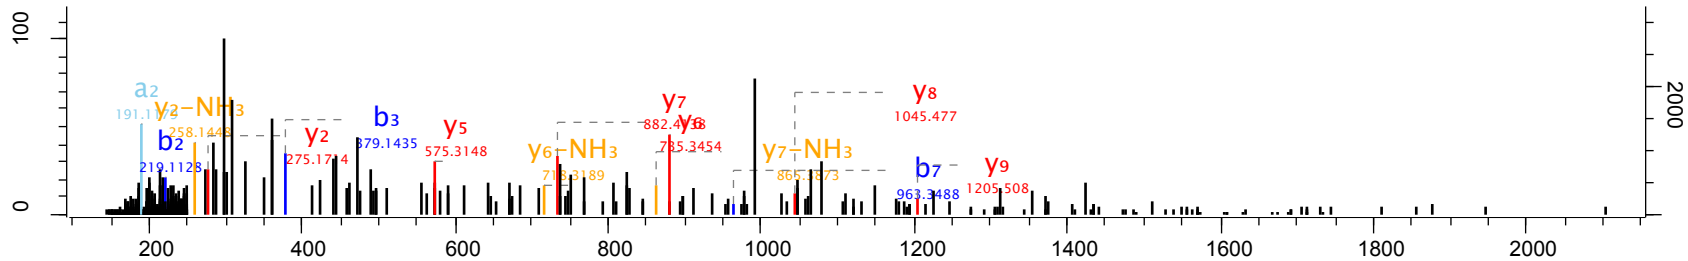

- A F C Y F C N S V Q K -

b<sub>2</sub> b<sub>3</sub> y<sub>9</sub> y<sub>8</sub> y<sub>7</sub> y<sub>6</sub> y<sub>5</sub> y<sub>2</sub>

Raw file

Scan

Method

Score

m/z

Gene names

20150226\_Hela\_Top\_opt\_A3\_01\_1593

34959

TOF; CID

59.16

827.4

GOLGA5

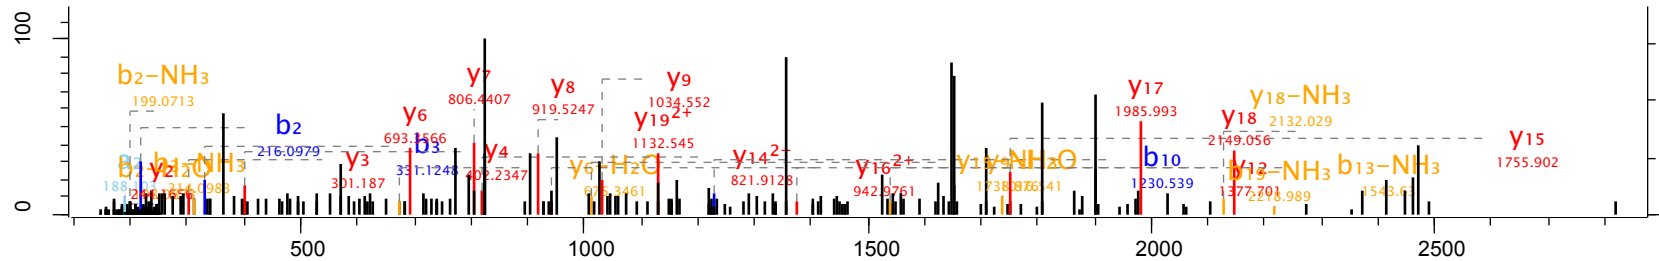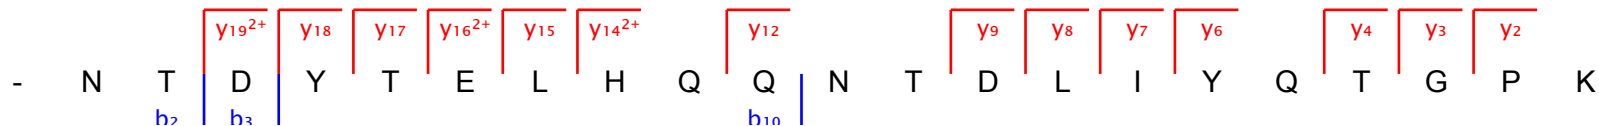

| Raw file                         | Scan  | Method   | Score | m/z    | Gene names |
|----------------------------------|-------|----------|-------|--------|------------|
| 20150226_Hela_Top_opt_A3_01_1593 | 35352 | TOF; CID | 62.46 | 387.89 | HDAC9      |

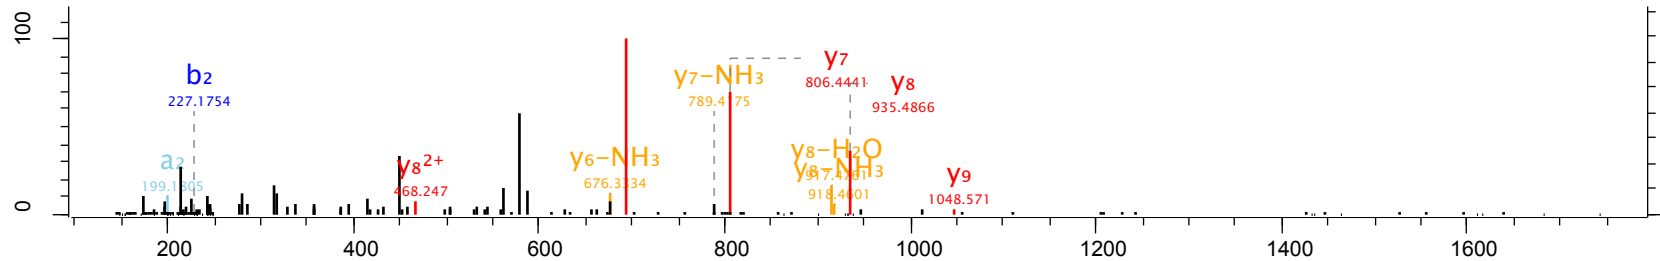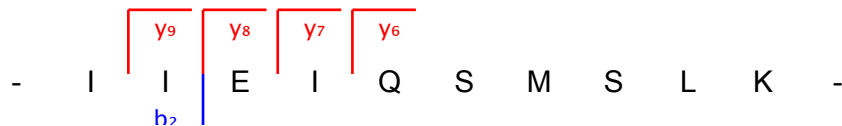



Raw file

20150226\_Hela\_Top\_opt\_A3\_01\_1593

Scan

37014

Method

TOF; CID

Score

75.76

m/z

739.37

Gene names

PROSER2;C10orf47

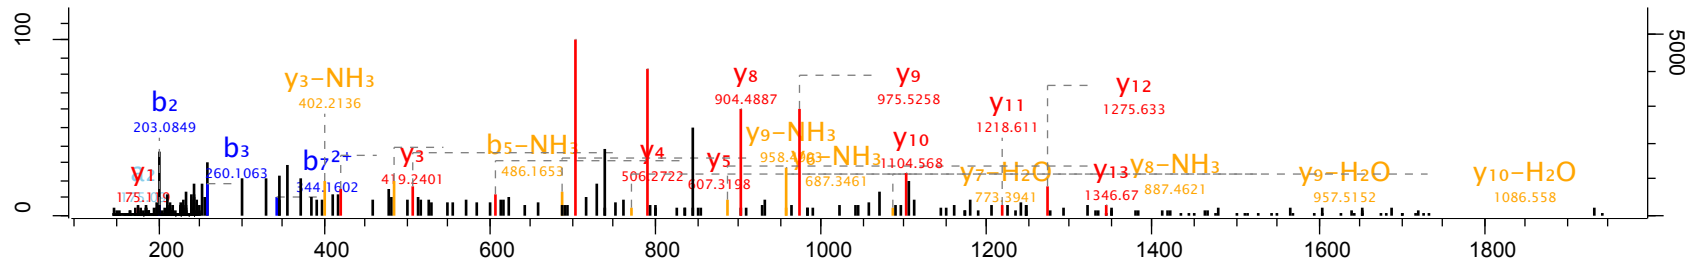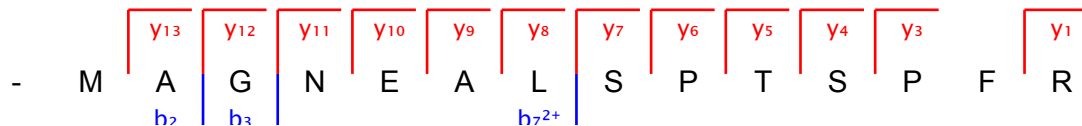

| Raw file                         | Scan  | Method   | Score | m/z    | Gene names |
|----------------------------------|-------|----------|-------|--------|------------|
| 20150226_Hela_Top_opt_A3_01_1593 | 37352 | TOF; CID | 75.2  | 540.79 | RAD18      |

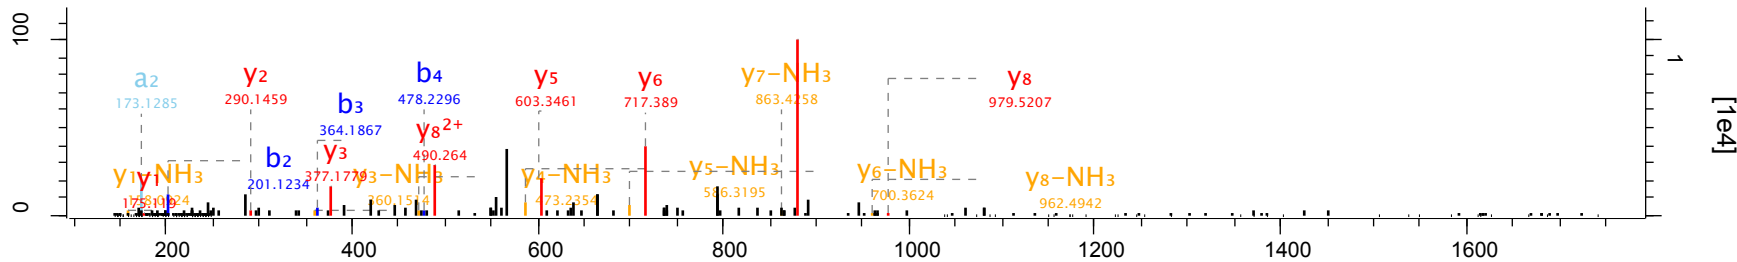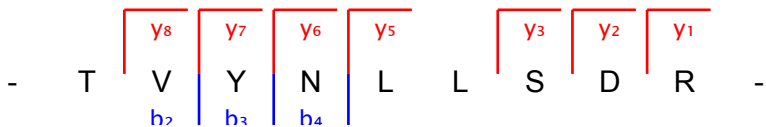

| Raw file                         | Scan  | Method   | Score | m/z   | Gene names |
|----------------------------------|-------|----------|-------|-------|------------|
| 20150226_Hela_Top_opt_A3_01_1593 | 37434 | TOF; CID | 70.06 | 547.3 | NARS       |

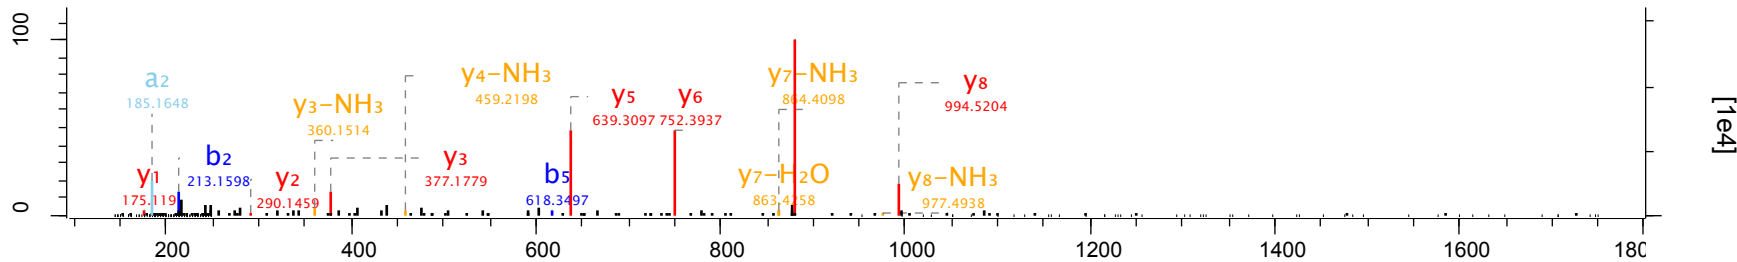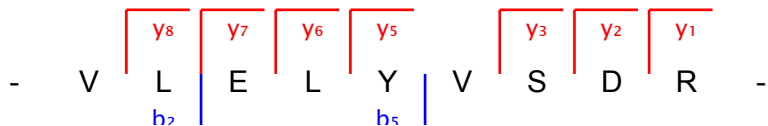

Raw file

20150226\_Hela\_Top\_opt\_A3\_01\_1593

Scan

37749

Method

TOF; CID

Score

122.12

m/z

785.39

Gene names

ZADH2

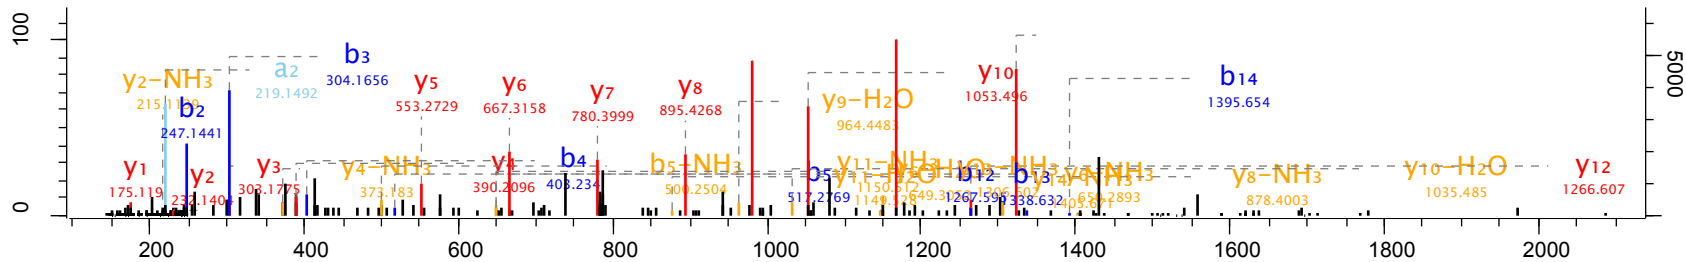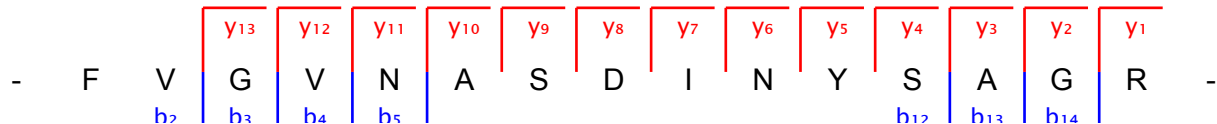

Raw file

20150226\_Hela\_Top\_opt\_A3\_01\_1593

Scan

37968

Method

TOF; CID

Score

50.83

m/z

1044.53

Gene names

POTED

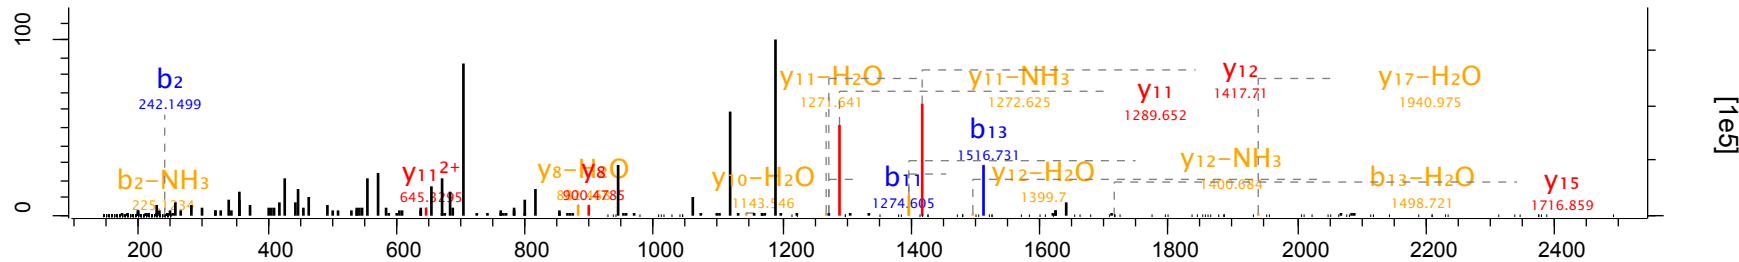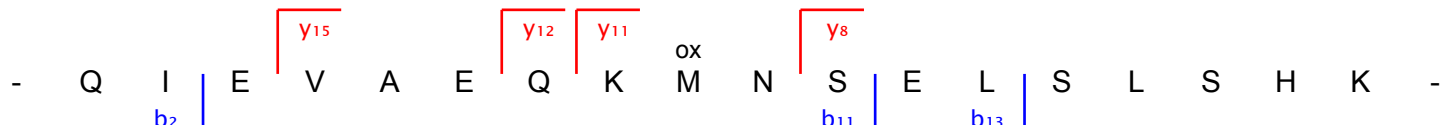

Raw file

20150226\_Hela\_Top\_opt\_A3\_01\_1593

Scan

38175

Method

TOF; CID

Score

74.97

m/z

796.42

Gene names

SYNRG

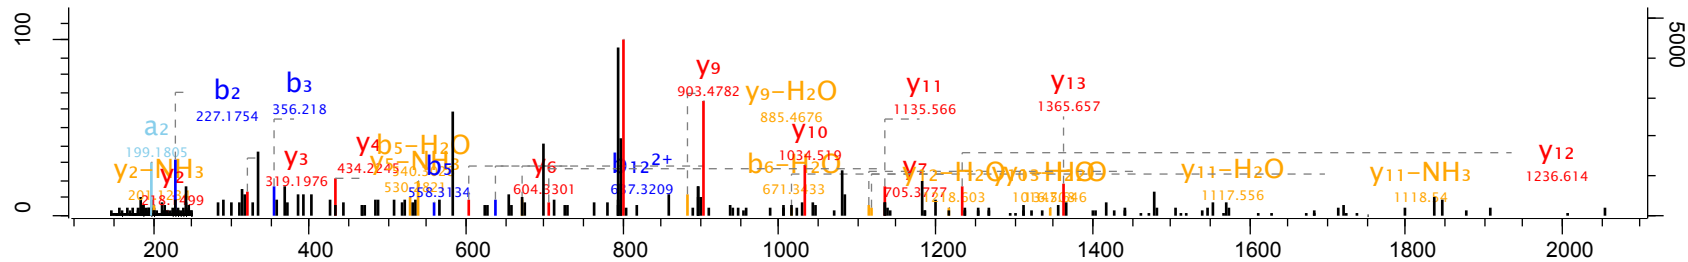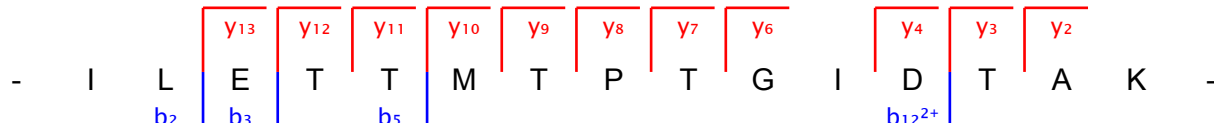

| Raw file                         | Scan  | Method   | Score | m/z    | Gene names    |
|----------------------------------|-------|----------|-------|--------|---------------|
| 20150226_Hela_Top_opt_A3_01_1593 | 38544 | TOF; CID | 79.84 | 837.41 | FAM45A;FAM45B |

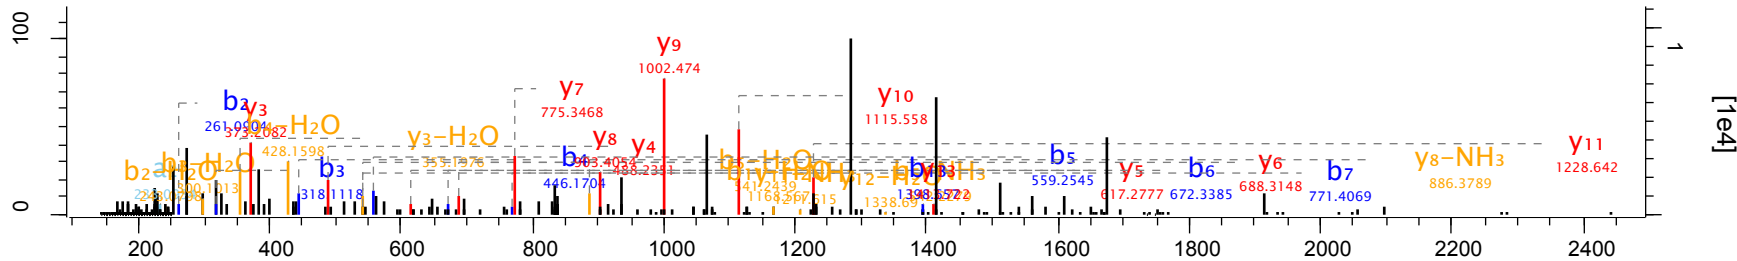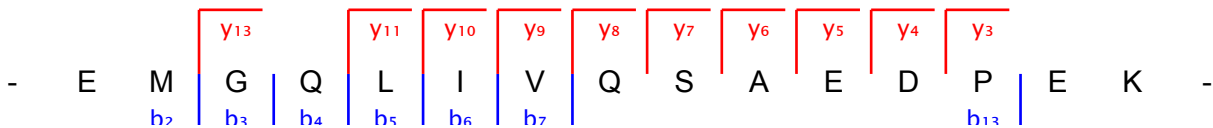

| Raw file                         | Scan  | Method   | Score  | m/z    | Gene names |
|----------------------------------|-------|----------|--------|--------|------------|
| 20150226_Hela_Top_opt_A3_01_1593 | 39636 | TOF; CID | 106.29 | 384.26 | MYO9A      |

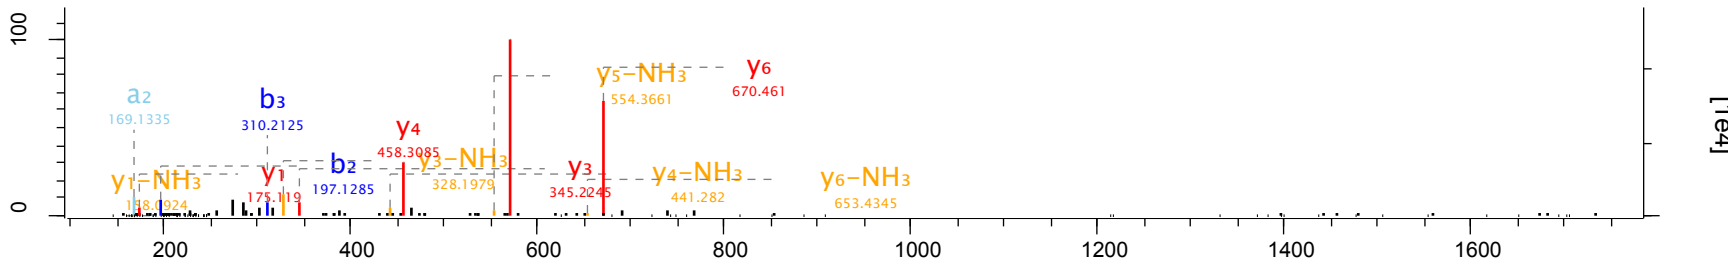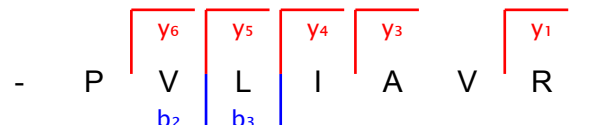



| Raw file                         | Scan  | Method   | Score | m/z    | Gene names |
|----------------------------------|-------|----------|-------|--------|------------|
| 20150226_Hela_Top_opt_A3_01_1593 | 40243 | TOF; CID | 62.47 | 563.81 | METTL14    |

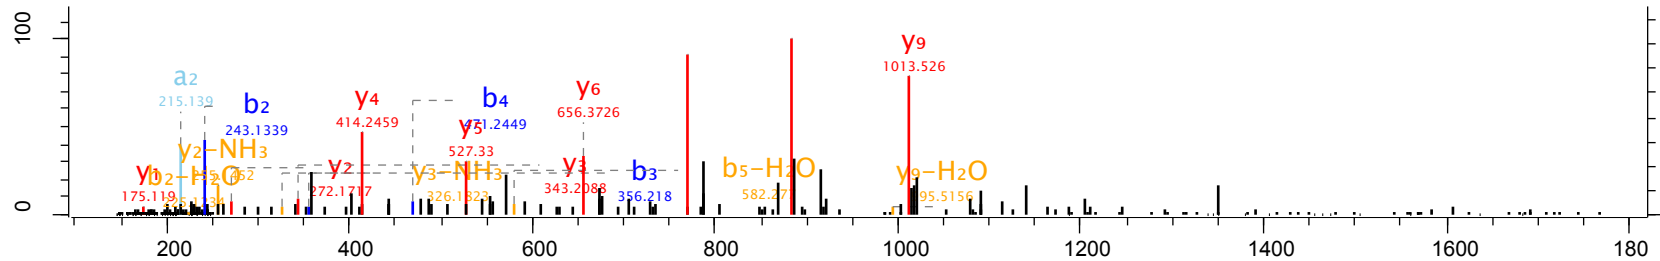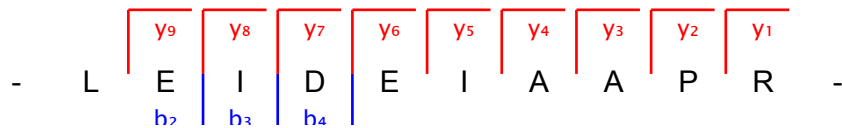

| Raw file                         | Scan  | Method   | Score | m/z    | Gene names |
|----------------------------------|-------|----------|-------|--------|------------|
| 20150226_Hela_Top_opt_A3_01_1593 | 40282 | TOF; CID | 62.47 | 514.83 | PLEKHF1    |

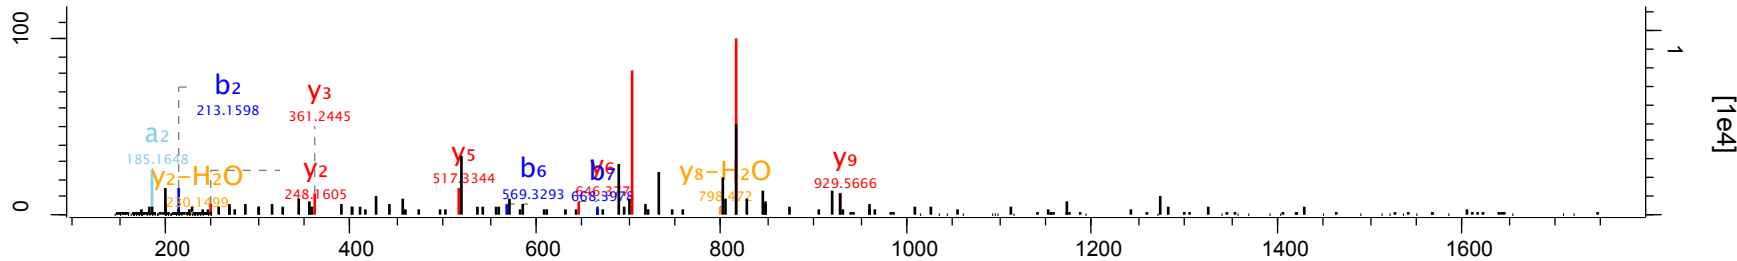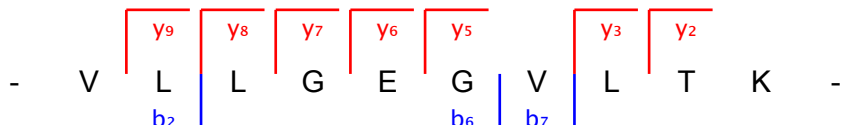

Raw file

20150226\_Hela\_Top\_opt\_A3\_01\_1593

Scan

40552

Method

TOF; CID

Score

81.97

m/z

546.81

Gene names

NAB2;NAB1

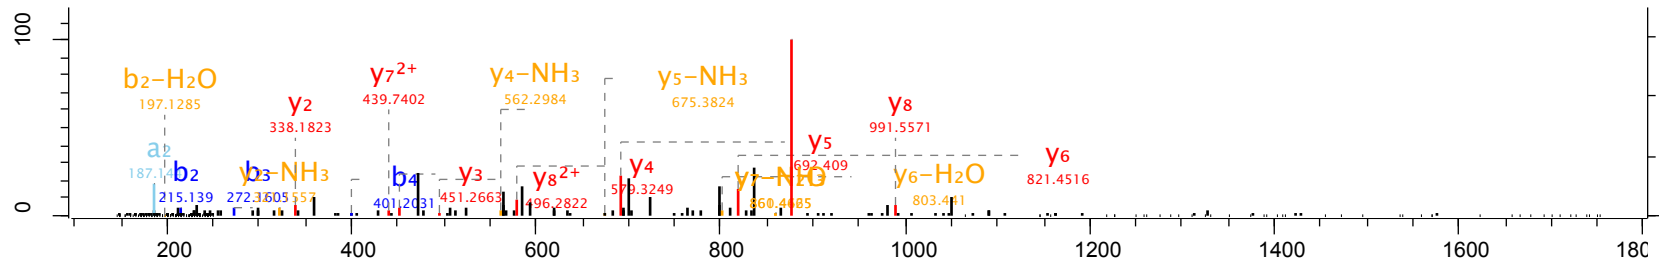

[1e4]

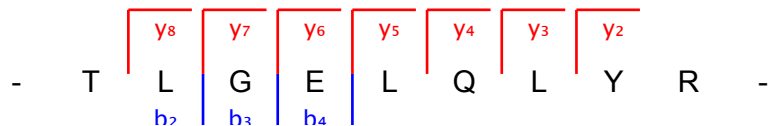

| Raw file                         | Scan  | Method   | Score | m/z    | Gene names |
|----------------------------------|-------|----------|-------|--------|------------|
| 20150226_Hela_Top_opt_A3_01_1593 | 41521 | TOF; CID | 71.88 | 709.39 | RPS19BP1   |

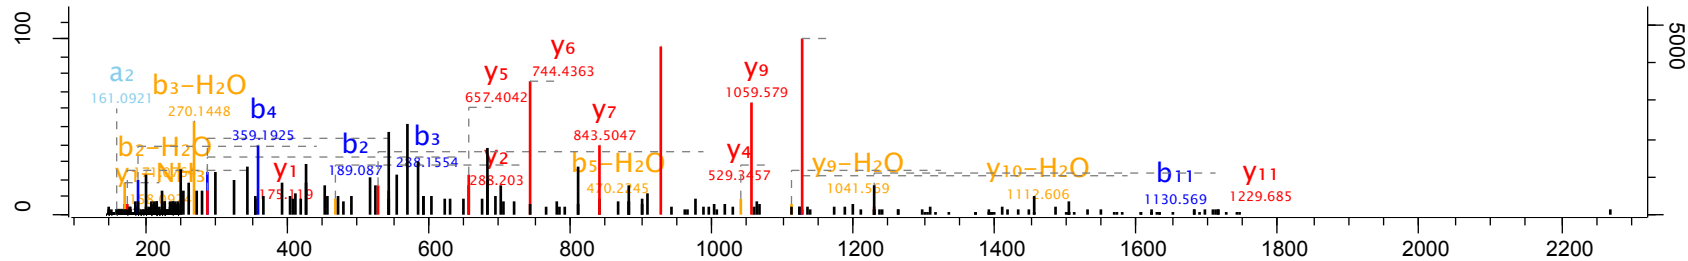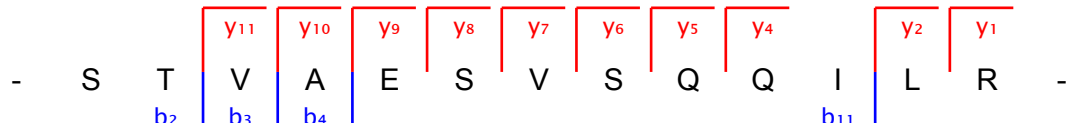

Raw file

20150226\_Hela\_Top\_opt\_A3\_01\_1593

Scan

41800

Method

TOF; CID

Score

57.53

m/z

934.96

Gene names

SDCCAG3

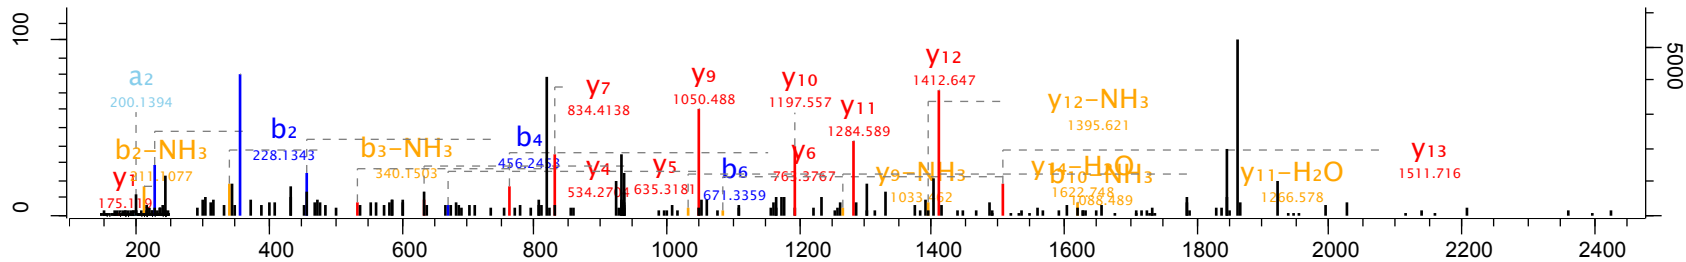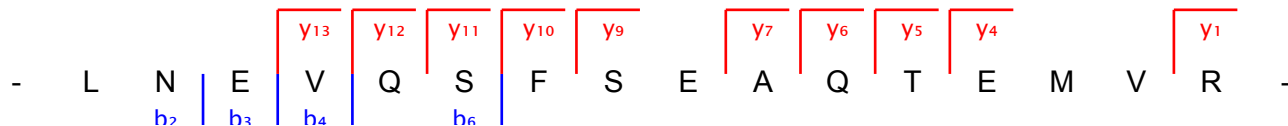

| Raw file                         | Scan  | Method   | Score | m/z    | Gene names |
|----------------------------------|-------|----------|-------|--------|------------|
| 20150226_Hela_Top_opt_A3_01_1593 | 42012 | TOF; CID | 93.84 | 477.26 | SAP30      |

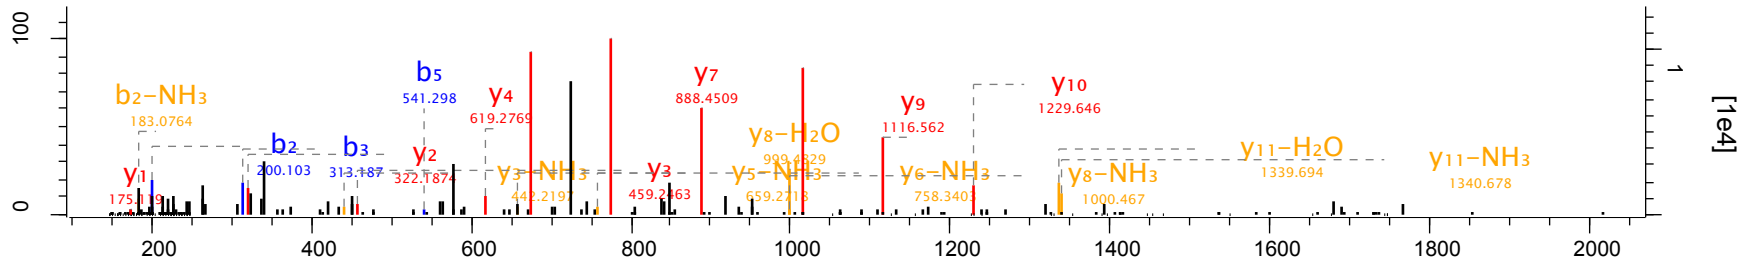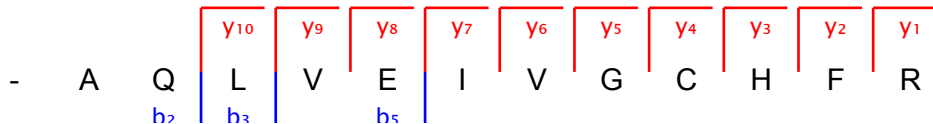

| Raw file                         | Scan  | Method   | Score | m/z    | Gene names |
|----------------------------------|-------|----------|-------|--------|------------|
| 20150226_Hela_Top_opt_A3_01_1593 | 42630 | TOF; CID | 58.7  | 492.77 | ITGB6      |

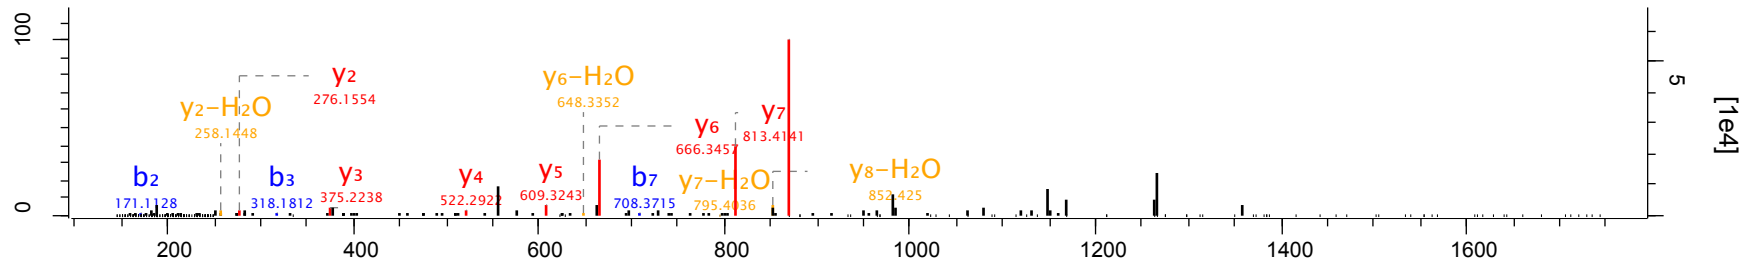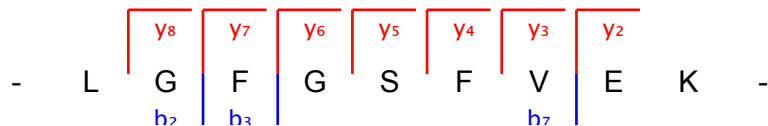

| Raw file                         | Scan  | Method   | Score | m/z    | Gene names |
|----------------------------------|-------|----------|-------|--------|------------|
| 20150226_Hela_Top_opt_A3_01_1593 | 43187 | TOF; CID | 66.69 | 582.81 | NEK5       |

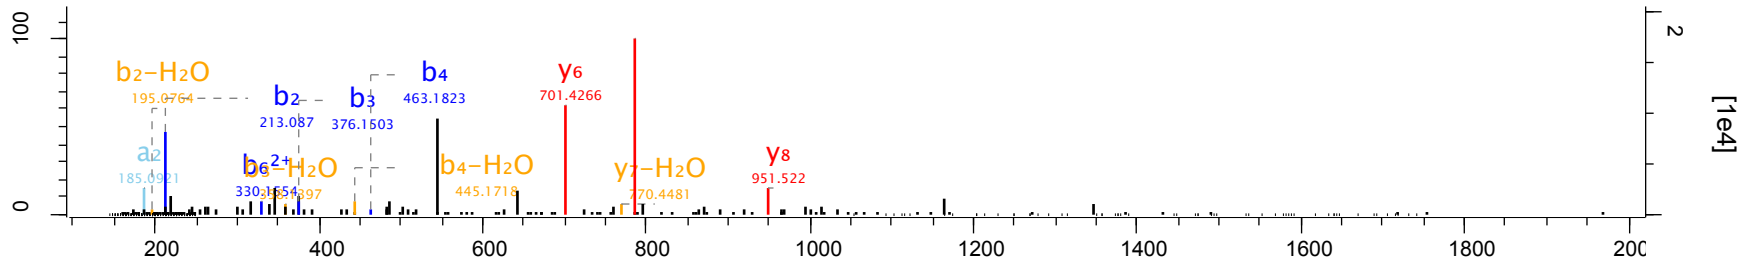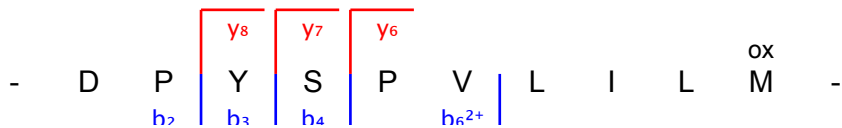



Raw file

20150226\_Hela\_Top\_opt\_A3\_01\_1593

Scan

45000

Method

TOF; CID

Score

43.38

m/z

605.33

Gene names

NAA30

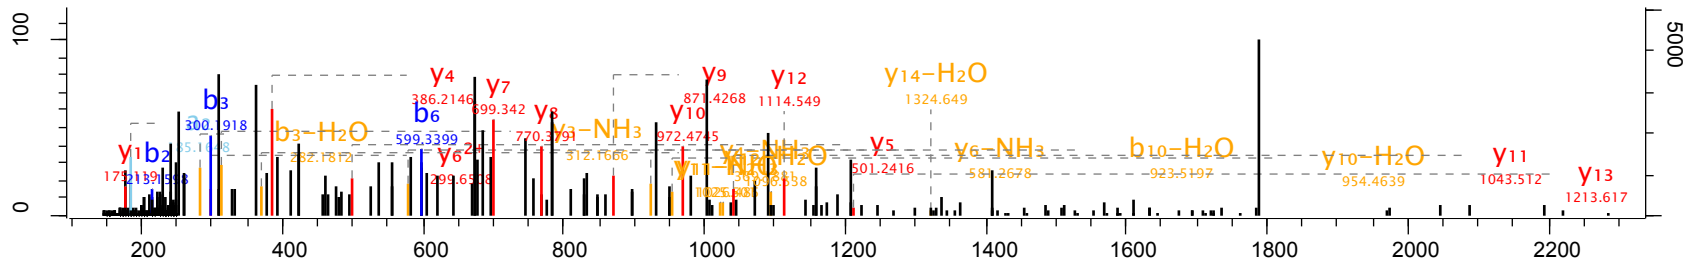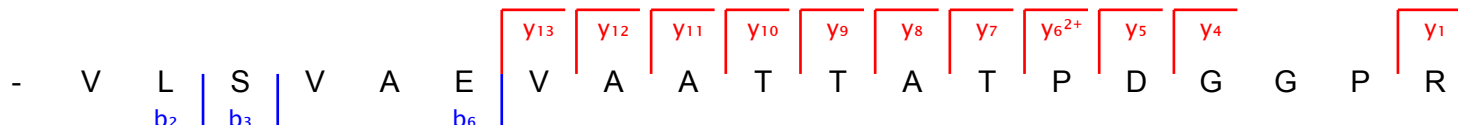

| Raw file                         | Scan  | Method   | Score | m/z    | Gene names |
|----------------------------------|-------|----------|-------|--------|------------|
| 20150226_Hela_Top_opt_A3_01_1593 | 45216 | TOF; CID | 83.99 | 862.42 | YIF1B      |

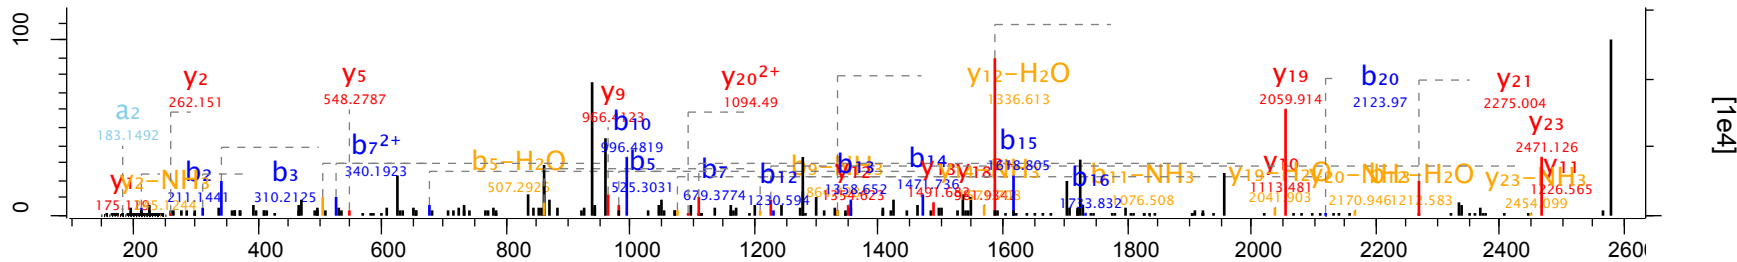

- I P V S Q P G M A D P H Q L F D D T S S A  
 b<sub>2</sub> b<sub>3</sub> b<sub>5</sub> b<sub>7</sub> b<sub>10</sub> b<sub>12</sub> b<sub>13</sub> b<sub>14</sub> b<sub>15</sub> b<sub>16</sub> b<sub>20</sub>  
 y<sub>23</sub> y<sub>21</sub> y<sub>20</sub><sup>2+</sup> y<sub>19</sub> y<sub>18</sub><sup>2+</sup> y<sub>14</sub> y<sub>13</sub> y<sub>12</sub> y<sub>11</sub> y<sub>10</sub> y<sub>9</sub> y<sub>5</sub>

Raw file

20150226\_Hela\_Top\_opt\_A3\_01\_1593

Scan

45304

Method

TOF; CID

Score

80.59

m/z

696.35

Gene names

SLC31A1

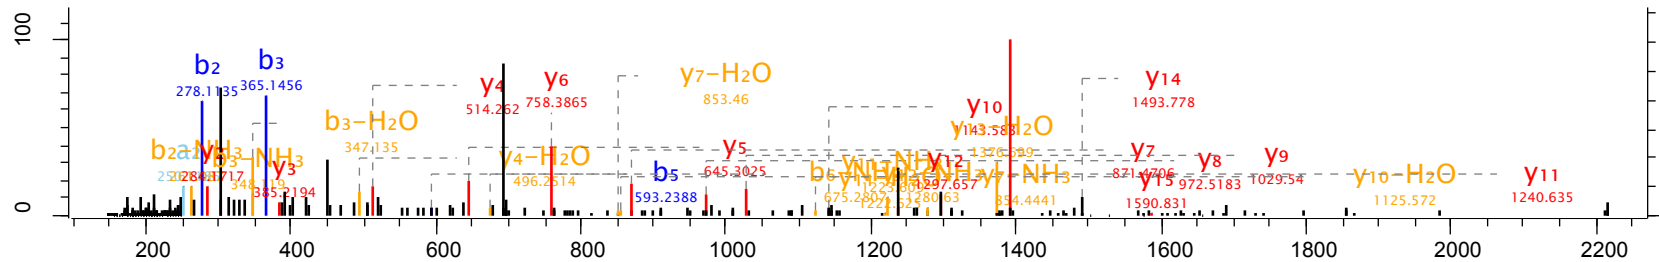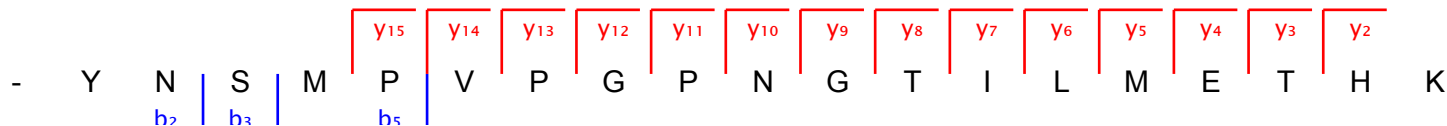

| Raw file                         | Scan  | Method   | Score  | m/z     | Gene names |
|----------------------------------|-------|----------|--------|---------|------------|
| 20150226_Hela_Top_opt_A3_01_1593 | 45993 | TOF; CID | 101.92 | 1089.06 | ATXN7L3B   |

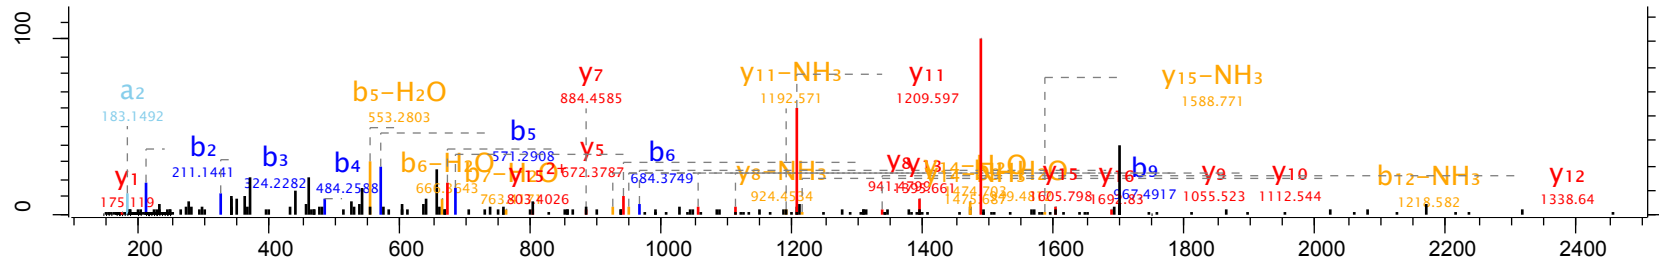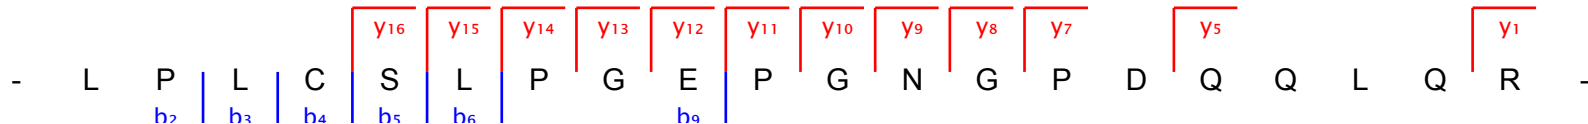

| Raw file                         | Scan  | Method   | Score | m/z    | Gene names |
|----------------------------------|-------|----------|-------|--------|------------|
| 20150226_Hela_Top_opt_A3_01_1593 | 46492 | TOF; CID | 69.82 | 482.79 | PLCH1      |

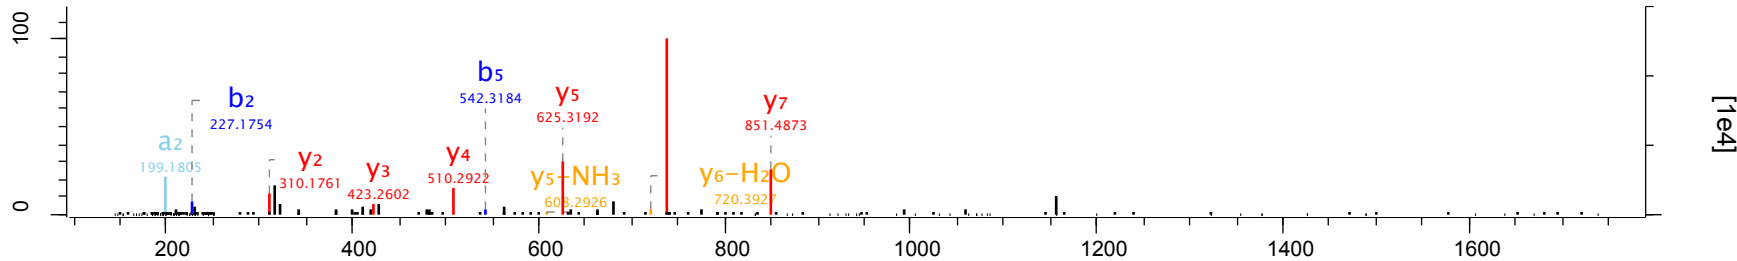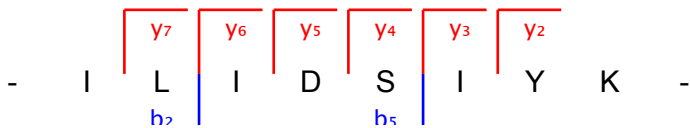

| Raw file                         | Scan  | Method   | Score | m/z    | Gene names |
|----------------------------------|-------|----------|-------|--------|------------|
| 20150226_Hela_Top_opt_A3_01_1593 | 47961 | TOF; CID | 76.06 | 504.73 | TMEM258    |

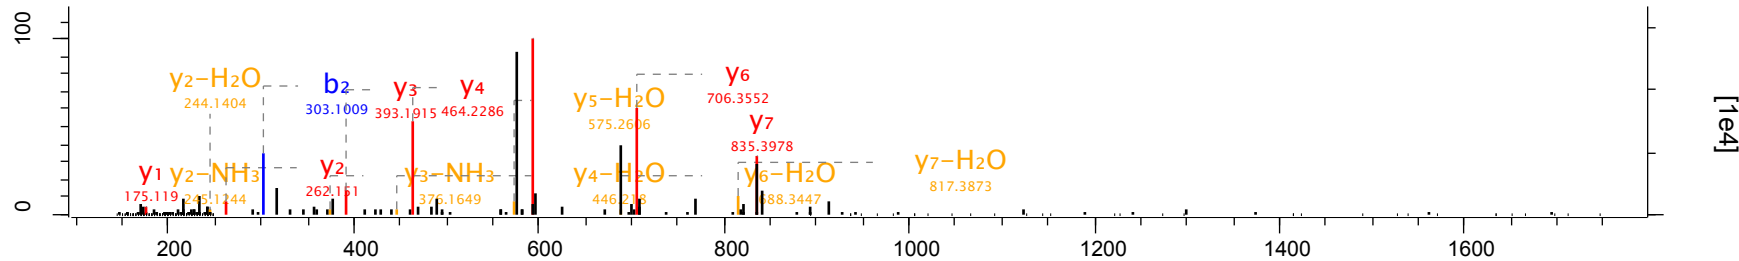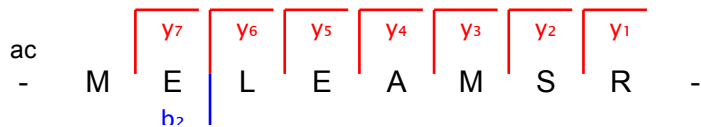

Raw file

20150226\_Hela\_Top\_opt\_A3\_01\_1593

Scan

48045

Method

TOF; CID

Score

56.51

m/z

718.42

Gene names

TIMM22

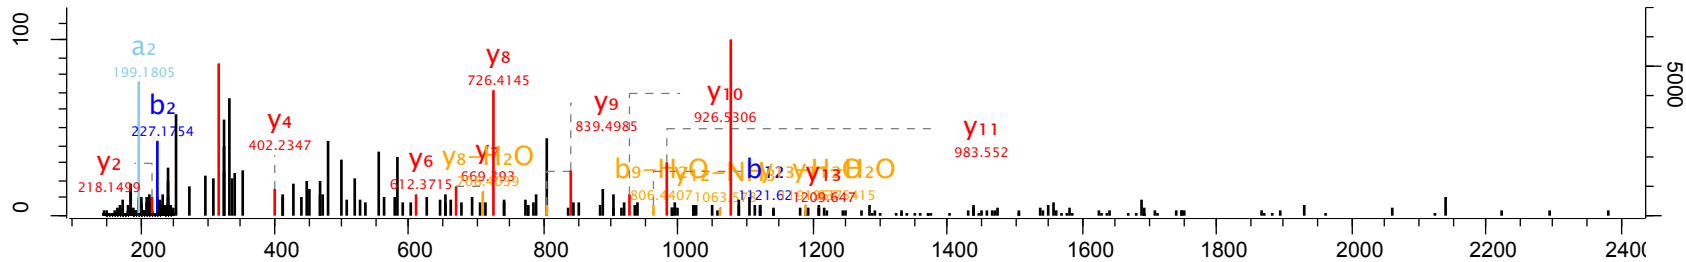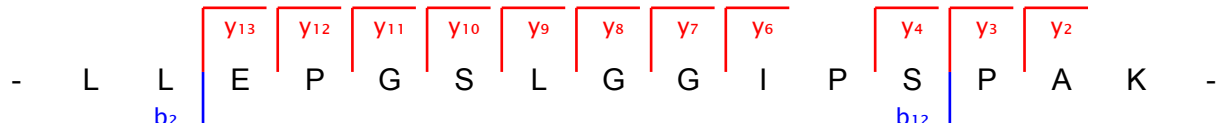

Raw file

20150226\_Hela\_Top\_opt\_A3\_01\_1593

Scan

48259

Method

TOF; CID

Score

82.28

m/z

487.3

Gene names

FAM134A

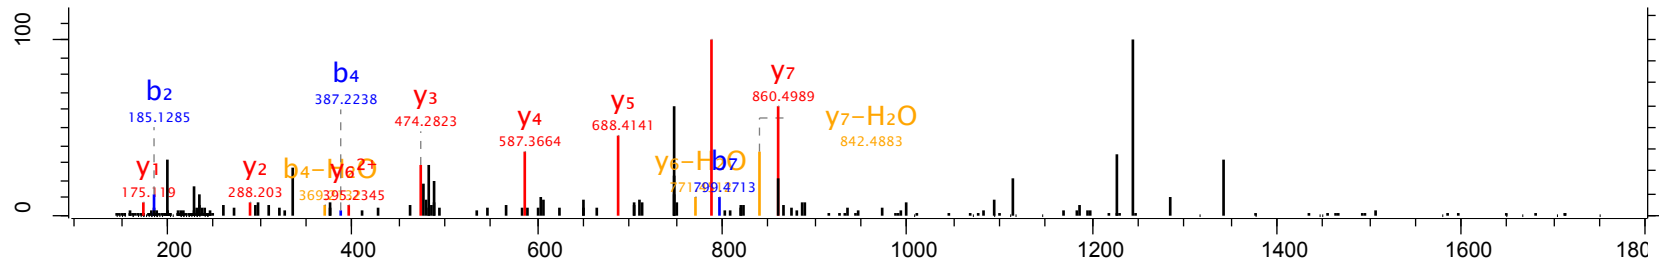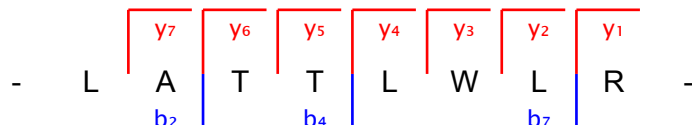



Raw file

Scan

Method

Score

m/z

Gene names

20150226\_Hela\_Top\_opt\_A3\_01\_1593

48784

TOF; CID

41.51

592.02

TFDP1

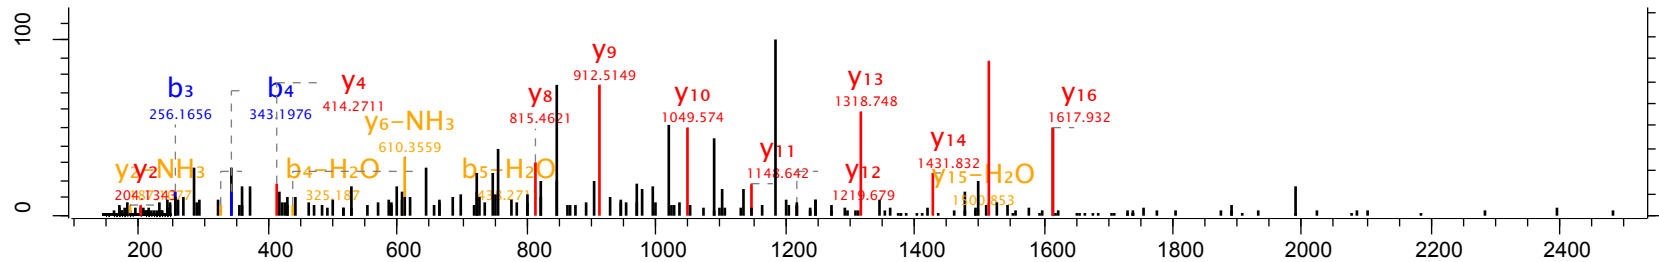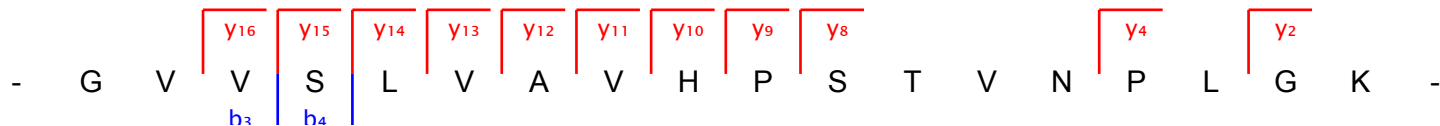

| Raw file                         | Scan  | Method   | Score | m/z    | Gene names |
|----------------------------------|-------|----------|-------|--------|------------|
| 20150226_Hela_Top_opt_A3_01_1593 | 48858 | TOF; CID | 66.64 | 735.04 | UBALD1     |

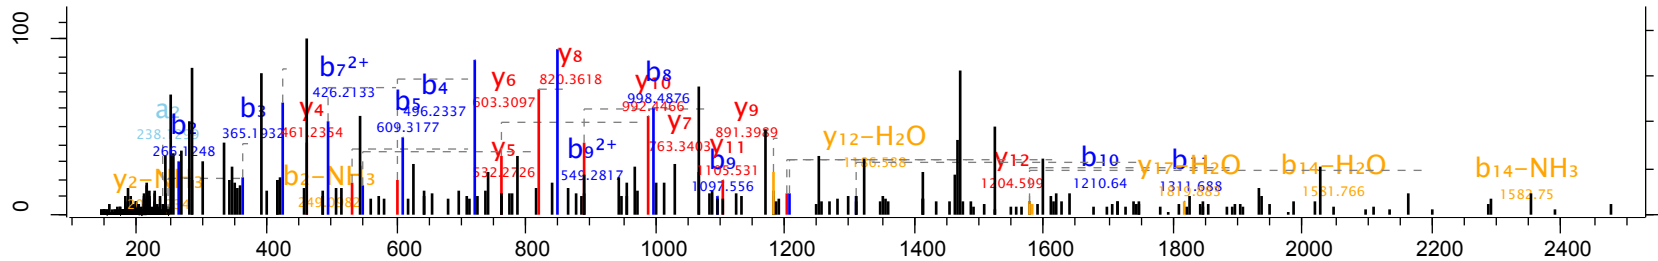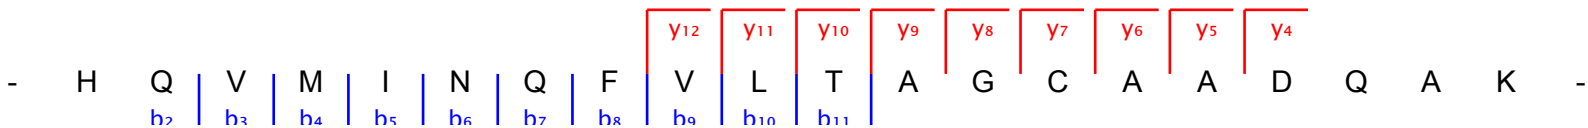

Raw file

20150226\_Hela\_Top\_opt\_A3\_01\_1593

Scan

48930

Method

TOF; CID

Score

80.73

m/z

990.45

Gene names

CDC42EP1

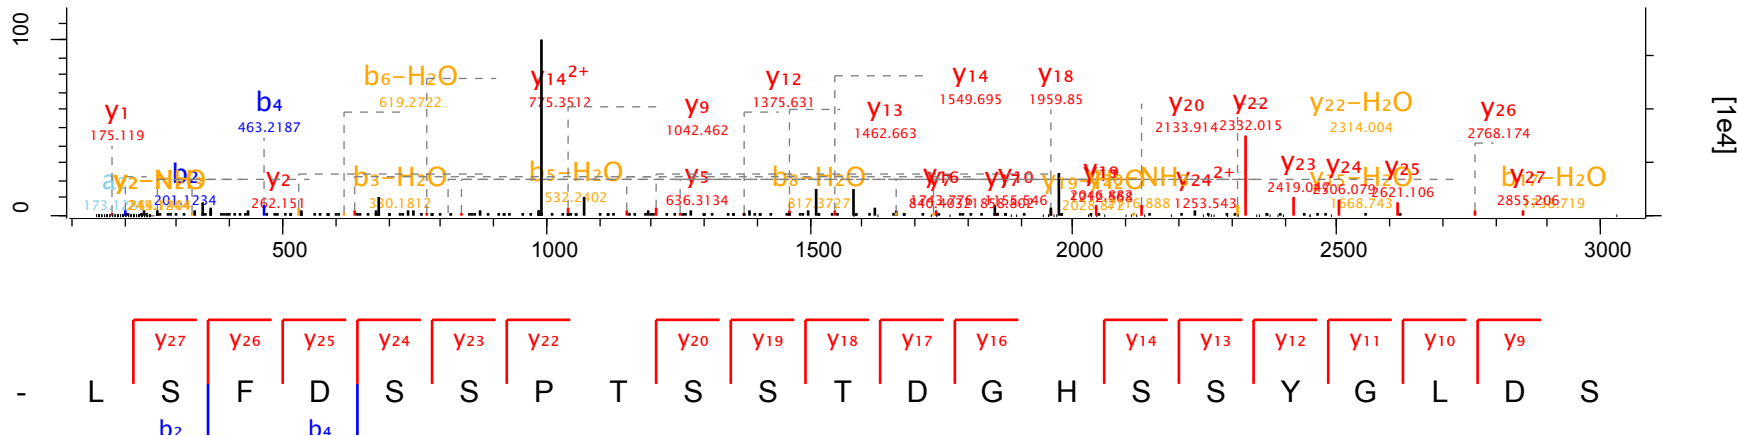

Raw file

20150226\_Hela\_Top\_opt\_A3\_01\_1593

Scan

49425

Method

TOF; CID

Score

53.55

m/z

950.46

Gene names

NKAP

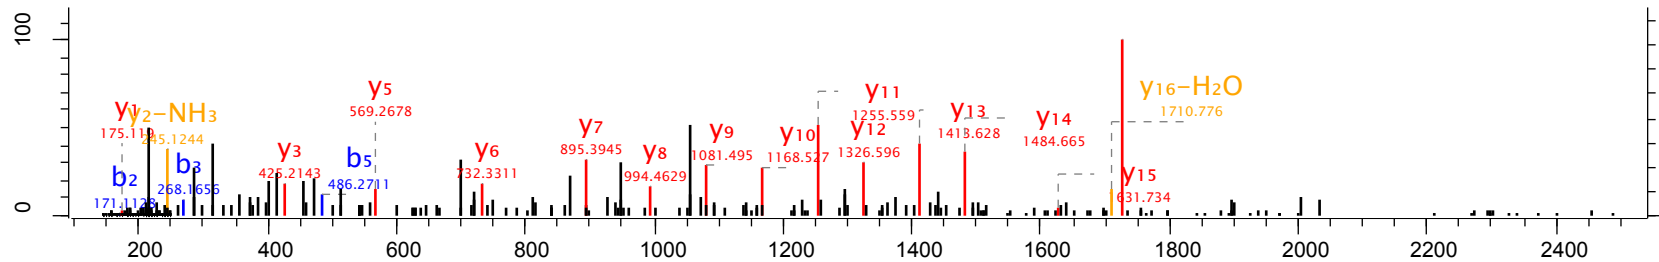

- G I P F A S A S V Y Y G S Y S R -

          b<sub>2</sub>          b<sub>3</sub>          b<sub>5</sub>

                  y<sub>16</sub>  y<sub>15</sub>  y<sub>14</sub>  y<sub>13</sub>  y<sub>12</sub>  y<sub>11</sub>  y<sub>10</sub>  y<sub>9</sub>  y<sub>8</sub>  y<sub>7</sub>  y<sub>6</sub>  y<sub>5</sub>          y<sub>3</sub>          y<sub>1</sub>

| Raw file                         | Scan  | Method   | Score | m/z    | Gene names |
|----------------------------------|-------|----------|-------|--------|------------|
| 20150226_Hela_Top_opt_A3_01_1593 | 49448 | TOF; CID | 55.72 | 578.35 | RFT1       |

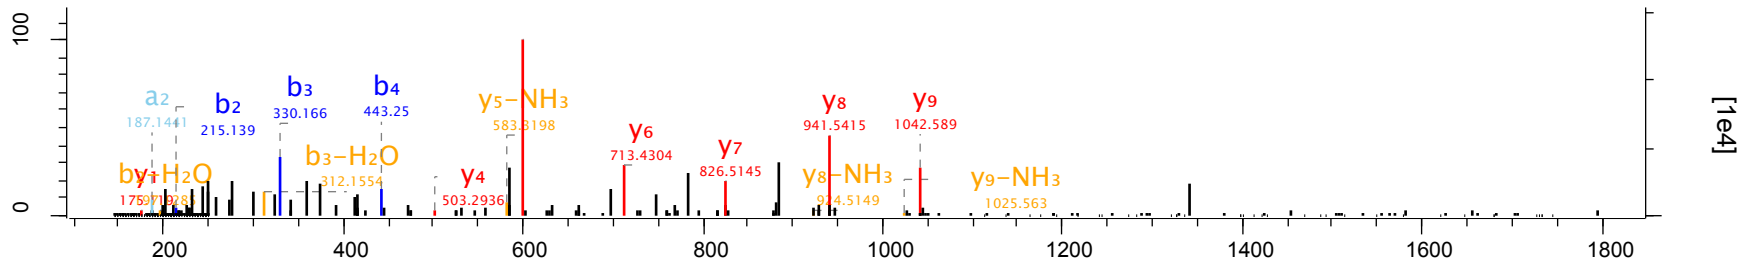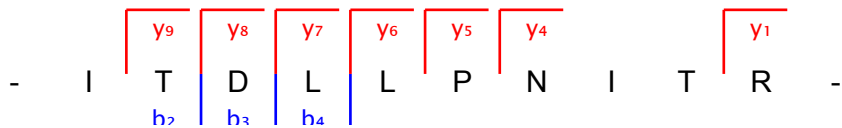

Raw file

20150226\_Hela\_Top\_opt\_A3\_01\_1593

Scan

50268

Method

TOF; CID

Score

96.34

m/z

622.38

Gene names

MT-ATP6

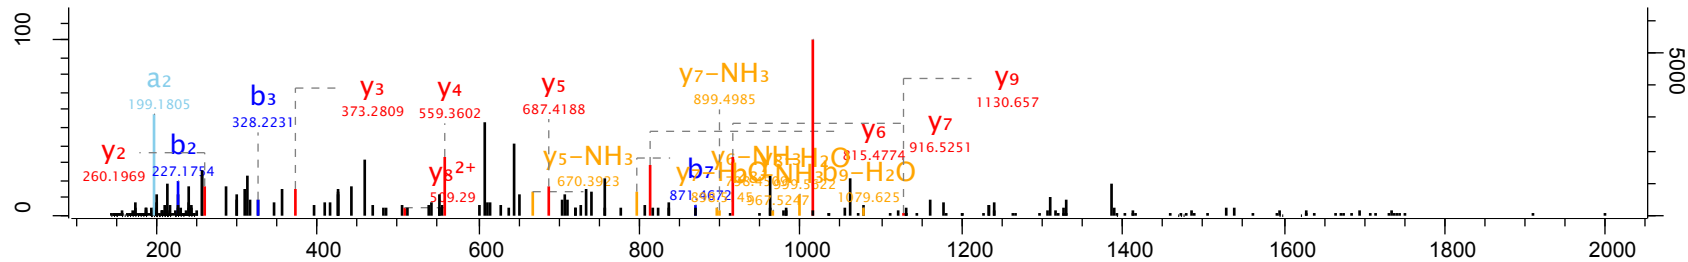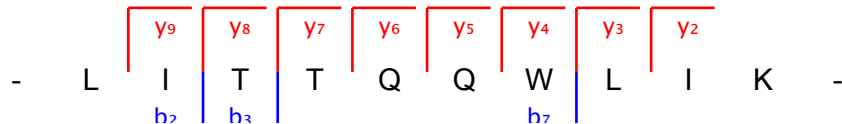

| Raw file                         | Scan  | Method   | Score | m/z    | Gene names |
|----------------------------------|-------|----------|-------|--------|------------|
| 20150226_Hela_Top_opt_A3_01_1593 | 51798 | TOF; CID | 88.45 | 713.04 | PDE6D      |

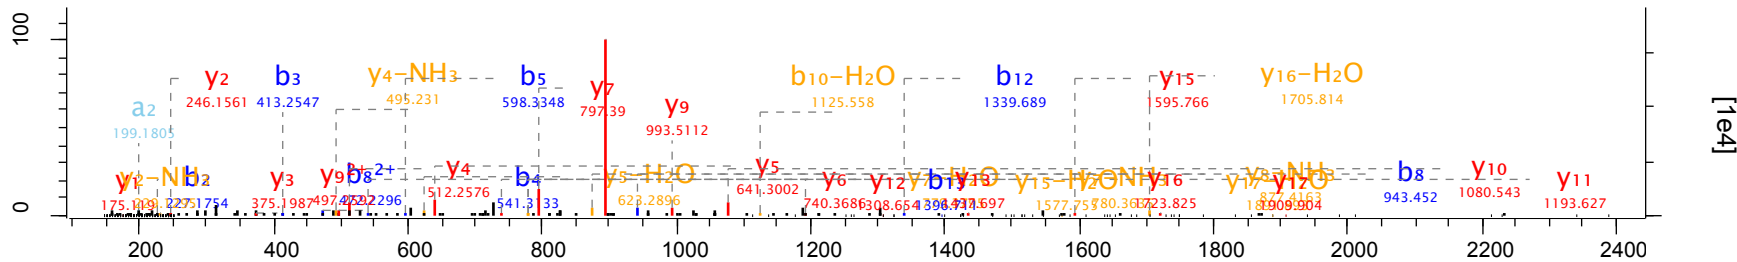

- I L W Q G T E D L S V P G V E H E A R -  
 b<sub>2</sub> b<sub>3</sub> b<sub>4</sub> b<sub>5</sub> b<sub>8</sub> b<sub>12</sub> b<sub>13</sub>

y<sub>17</sub> y<sub>16</sub> y<sub>15</sub> y<sub>13</sub> y<sub>12</sub> y<sub>11</sub> y<sub>10</sub> y<sub>9</sub> y<sub>8</sub> y<sub>7</sub> y<sub>6</sub> y<sub>5</sub> y<sub>4</sub> y<sub>3</sub> y<sub>2</sub> y<sub>1</sub>

| Raw file                         | Scan  | Method   | Score | m/z    | Gene names |
|----------------------------------|-------|----------|-------|--------|------------|
| 20150226_Hela_Top_opt_A3_01_1593 | 51816 | TOF; CID | 61.78 | 594.31 | SLC6A6     |

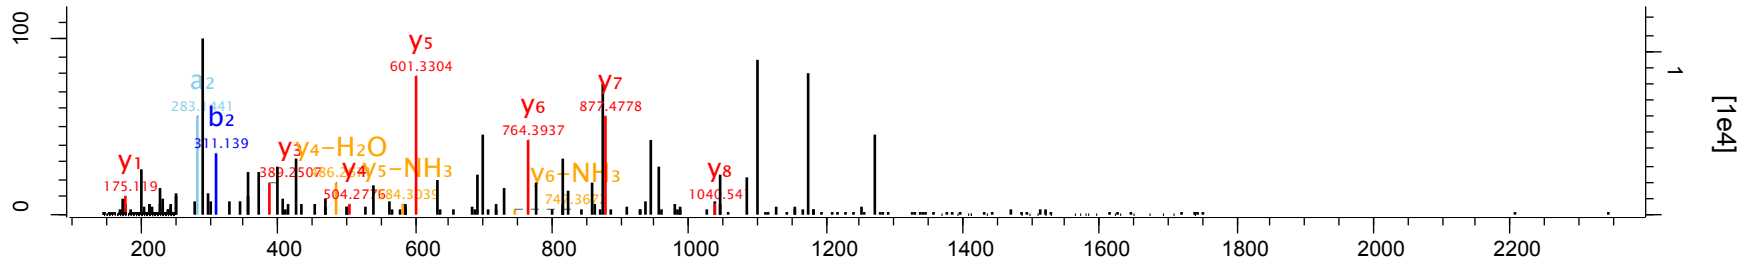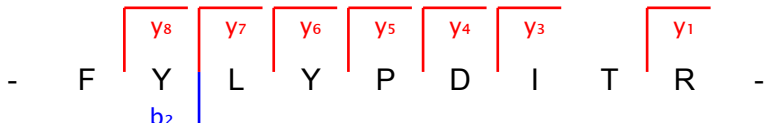



| Raw file                         | Scan  | Method   | Score | m/z    | Gene names |
|----------------------------------|-------|----------|-------|--------|------------|
| 20150226_Hela_Top_opt_A3_01_1593 | 51842 | TOF; CID | 75.91 | 585.34 | GATAD1     |

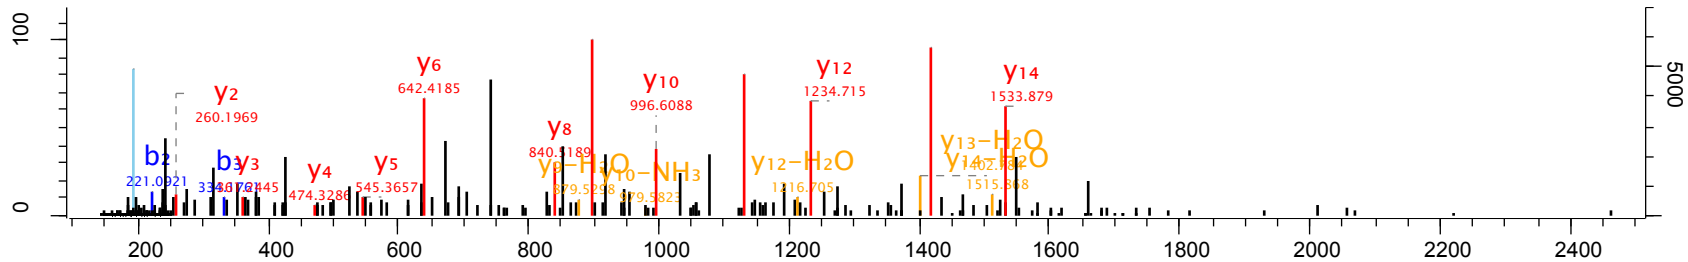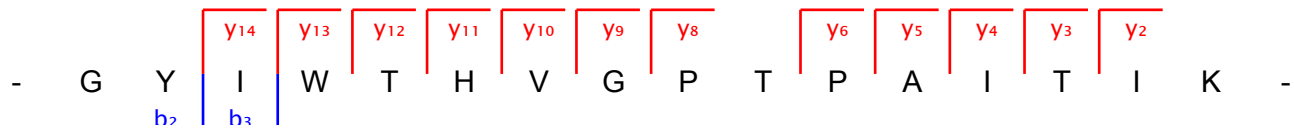

Raw file

20150226\_Hela\_Top\_opt\_A3\_01\_1593

Scan

52203

Method

TOF; CID

Score

109.04

m/z

914.43

Gene names

RAP2C

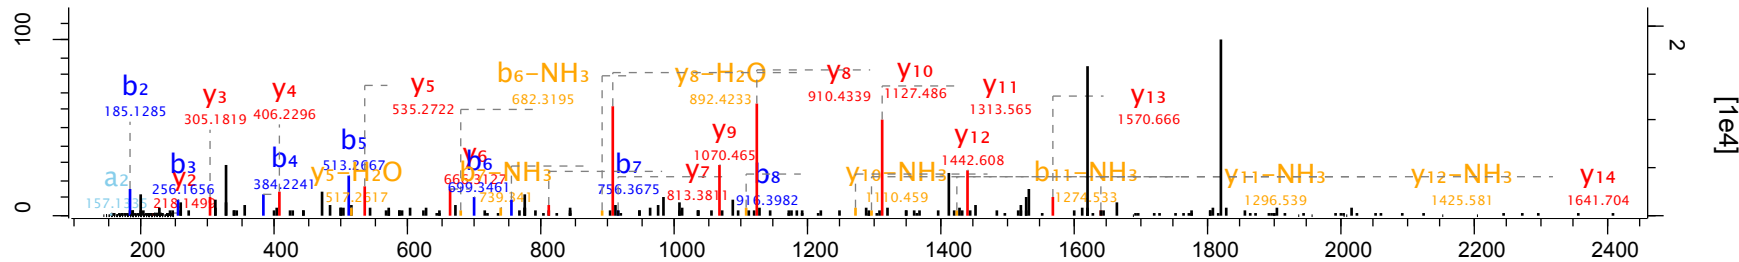

- A L A Q E W G C P F M E T S A K -

b<sub>2</sub> y<sub>14</sub> y<sub>13</sub> y<sub>12</sub> y<sub>11</sub> y<sub>10</sub> y<sub>9</sub> y<sub>8</sub> y<sub>7</sub> y<sub>6</sub> y<sub>5</sub> y<sub>4</sub> y<sub>3</sub> y<sub>2</sub>  
b<sub>3</sub> b<sub>4</sub> b<sub>5</sub> b<sub>6</sub> b<sub>7</sub> b<sub>8</sub>

| Raw file                         | Scan  | Method   | Score | m/z     | Gene names |
|----------------------------------|-------|----------|-------|---------|------------|
| 20150226_Hela_Top_opt_A3_01_1593 | 52472 | TOF; CID | 62.62 | 1112.51 | EBAG9      |

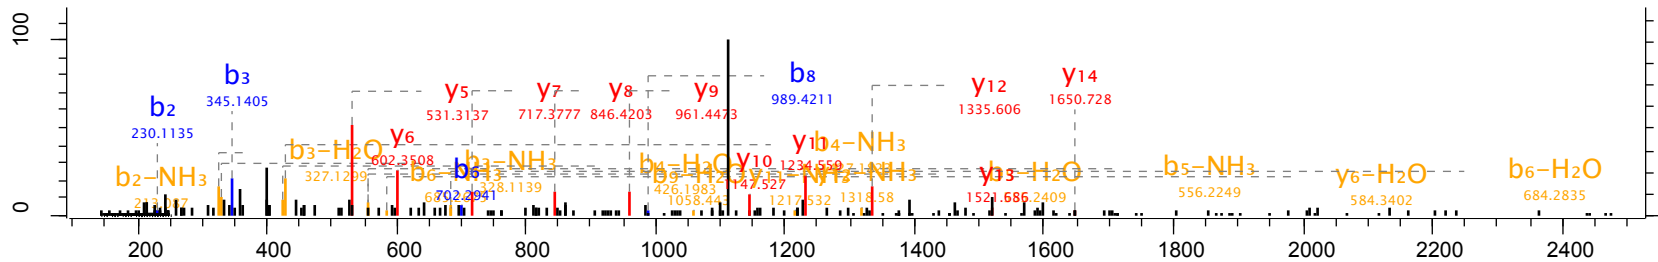

Protein sequence: - Q T D V E E W T S W D E D A P T S V K -

Fragmentation sites (b and y ions) are indicated by vertical lines and brackets below the sequence:

- b<sub>2</sub> (blue) at T
- b<sub>3</sub> (blue) at D
- b<sub>6</sub> (blue) at E
- b<sub>8</sub> (blue) at T
- y<sub>5</sub> (red) between E and W
- y<sub>6</sub> (red) between A and P
- y<sub>7</sub> (red) between D and E
- y<sub>8</sub> (red) between E and D
- y<sub>9</sub> (red) between W and D
- y<sub>10</sub> (red) between S and W
- y<sub>11</sub> (red) between T and S
- y<sub>12</sub> (red) between W and T
- y<sub>13</sub> (red) between E and W
- y<sub>14</sub> (red) between E and E

Raw file

20150226\_Hela\_Top\_opt\_A3\_01\_1593

Scan

53372

Method

TOF; CID

Score

49.27

m/z

803.43

Gene names

MEF2D

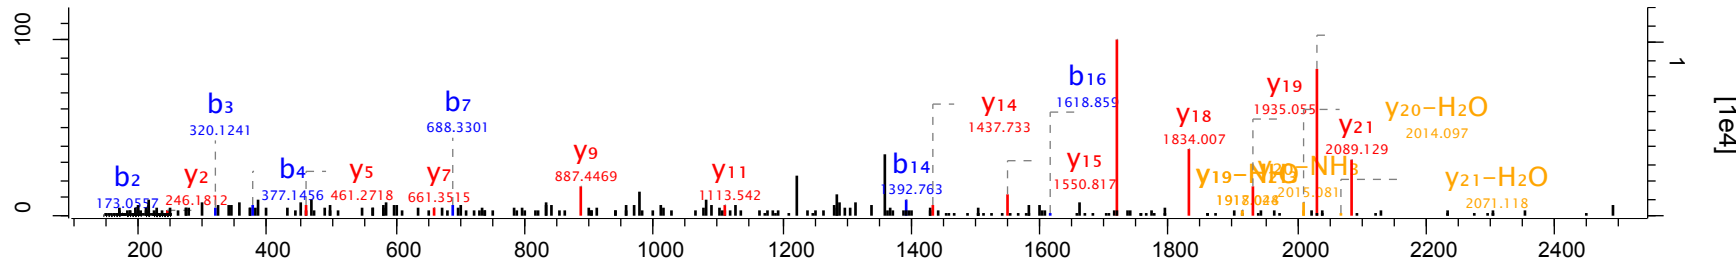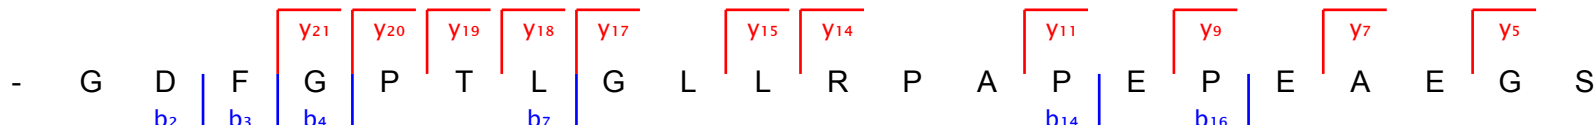

| Raw file                         | Scan  | Method   | Score | m/z    | Gene names |
|----------------------------------|-------|----------|-------|--------|------------|
| 20150226_Hela_Top_opt_A3_01_1593 | 54545 | TOF; CID | 69.82 | 415.77 | AKT1       |

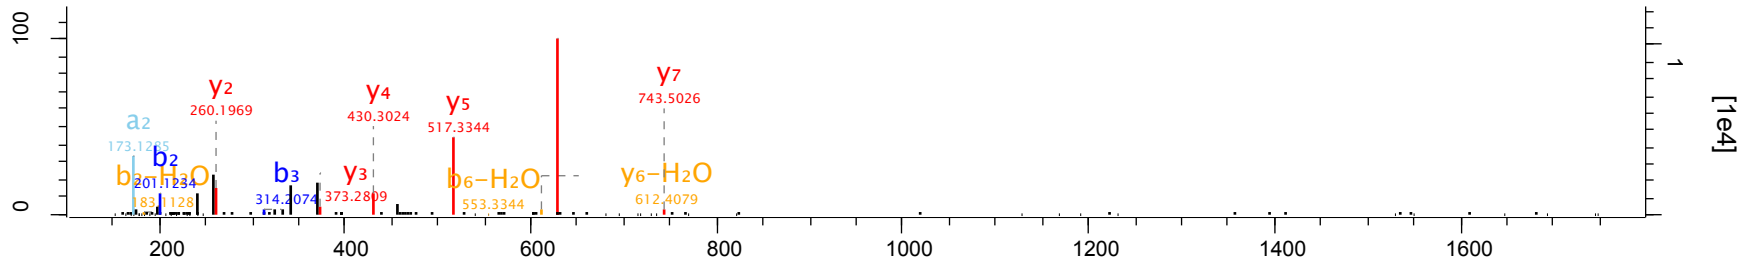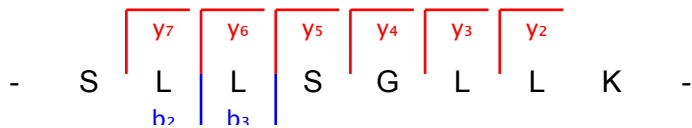

| Raw file                         | Scan  | Method   | Score | m/z    | Gene names |
|----------------------------------|-------|----------|-------|--------|------------|
| 20150226_Hela_Top_opt_A3_01_1593 | 54672 | TOF; CID | 57.17 | 579.34 | WRN        |

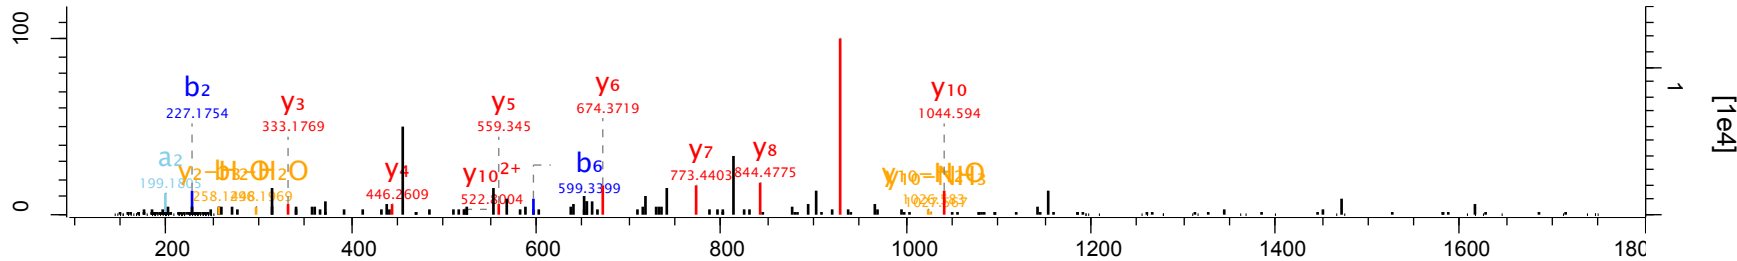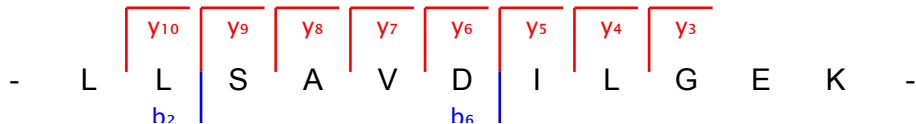

Raw file

20150226\_Hela\_Top\_opt\_A3\_01\_1593

Scan

54707

Method

TOF; CID

Score

87.43

m/z

959.91

Gene names

RYBP

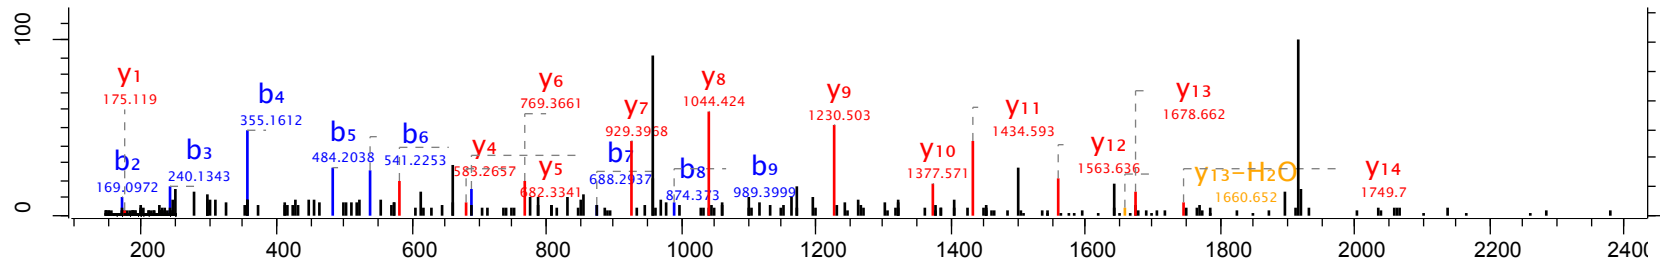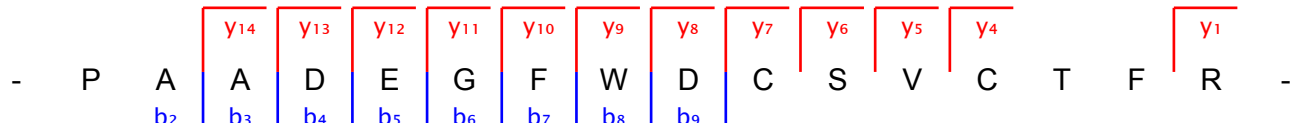

| Raw file                         | Scan  | Method   | Score | m/z    | Gene names |
|----------------------------------|-------|----------|-------|--------|------------|
| 20150226_Hela_Top_opt_A3_01_1593 | 55766 | TOF; CID | 50.27 | 887.75 | NDUFA3     |

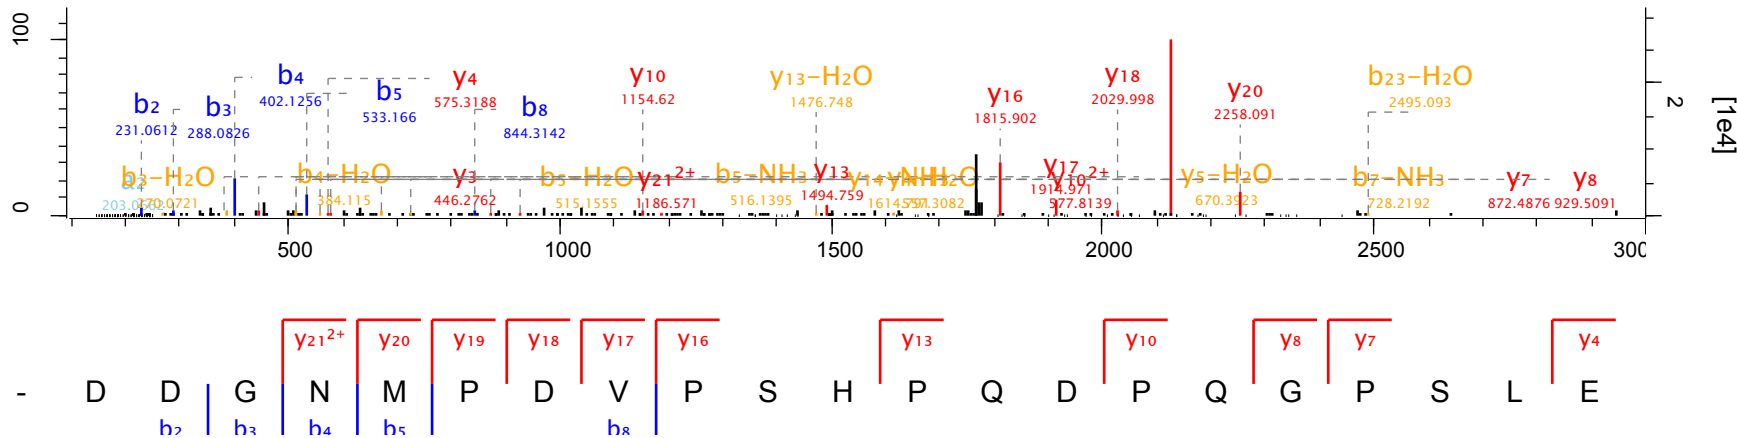



Raw file Scan Method Score m/z Gene names

20150226\_Hela\_Top\_opt\_A3\_01\_1593 56075 TOF; CID 80.38 425.74 PRAMEF6;PRAMEF23;PRAMEF5;PRAMEF9;PRAMEF11;PRAMEF4;PRAMEF26

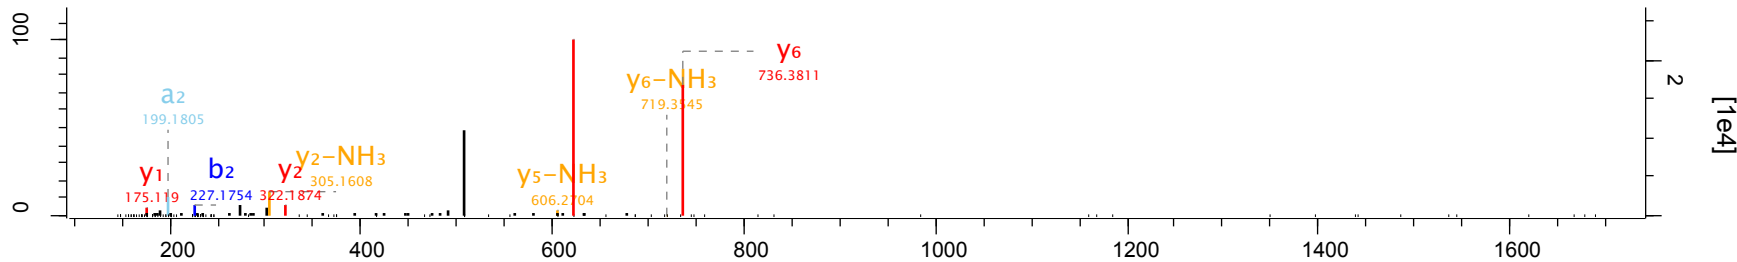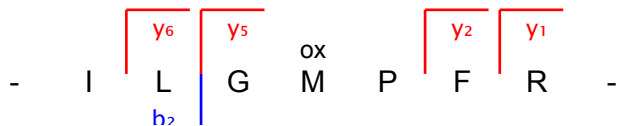

| Raw file                         | Scan  | Method   | Score | m/z    | Gene names |
|----------------------------------|-------|----------|-------|--------|------------|
| 20150226_Hela_Top_opt_A3_01_1593 | 56734 | TOF; CID | 81.53 | 839.44 | MUL1       |

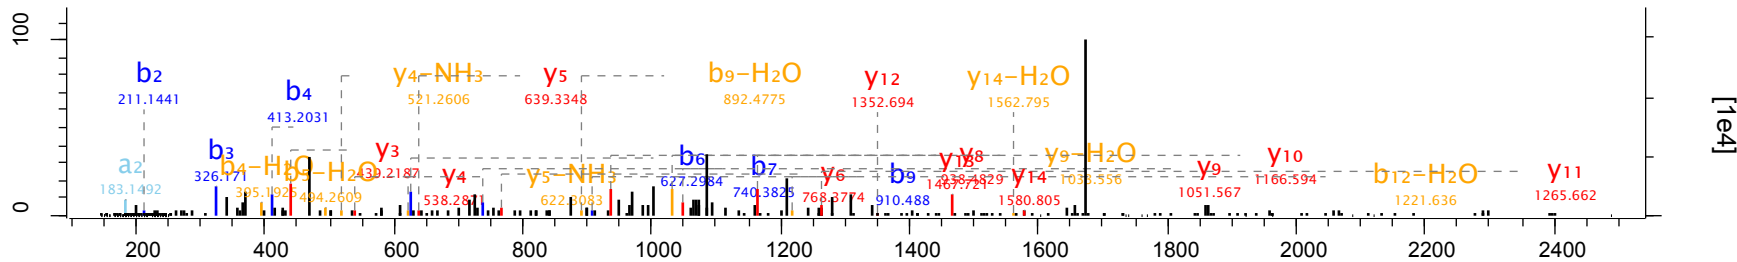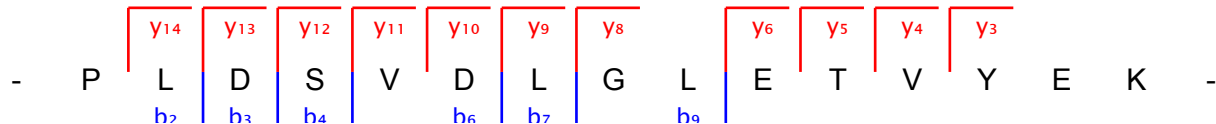

Raw file

20150226\_Hela\_Top\_opt\_A3\_01\_1593

Scan

57383

Method

TOF; CID

Score

83.39

m/z

723.06

Gene names

MITD1

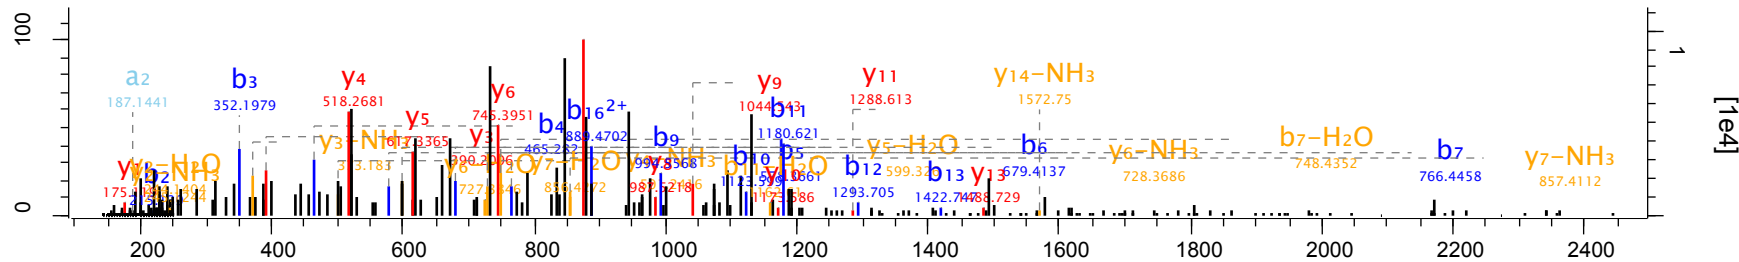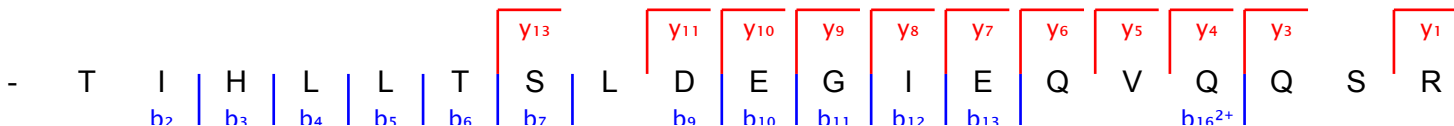

| Raw file                         | Scan  | Method   | Score | m/z     | Gene names |
|----------------------------------|-------|----------|-------|---------|------------|
| 20150226_Hela_Top_opt_A3_01_1593 | 57812 | TOF; CID | 81.72 | 1197.59 | BAK1       |

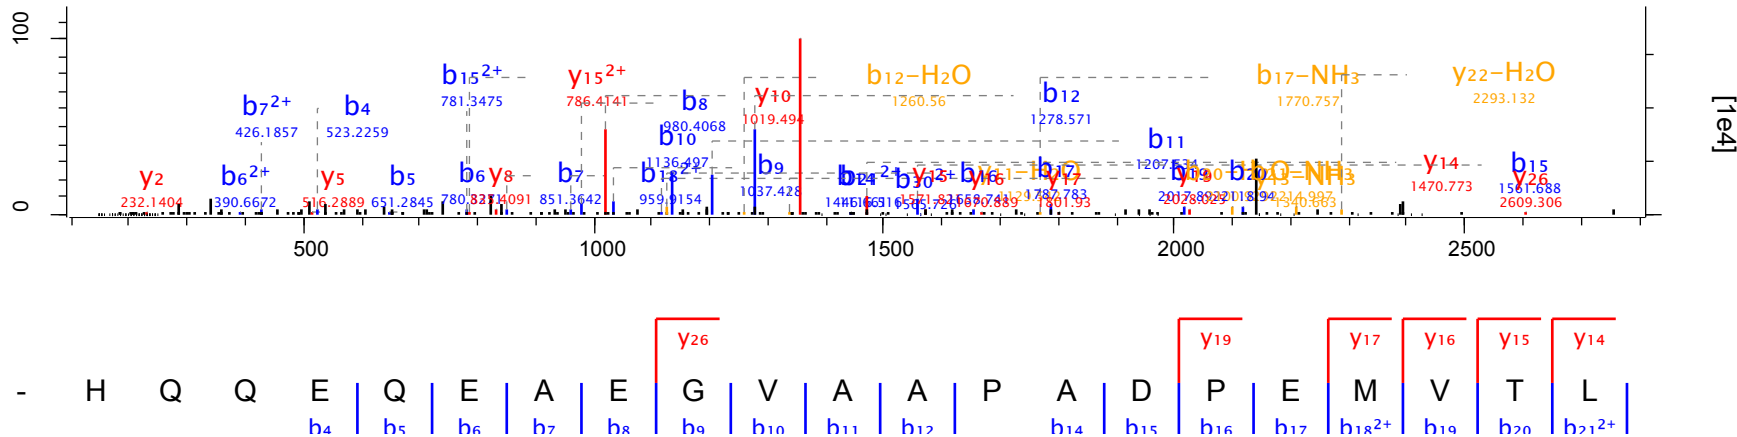

| Raw file                         | Scan  | Method   | Score | m/z    | Gene names |
|----------------------------------|-------|----------|-------|--------|------------|
| 20150226_Hela_Top_opt_A3_01_1593 | 57822 | TOF; CID | 61.87 | 575.97 | FBXL15     |

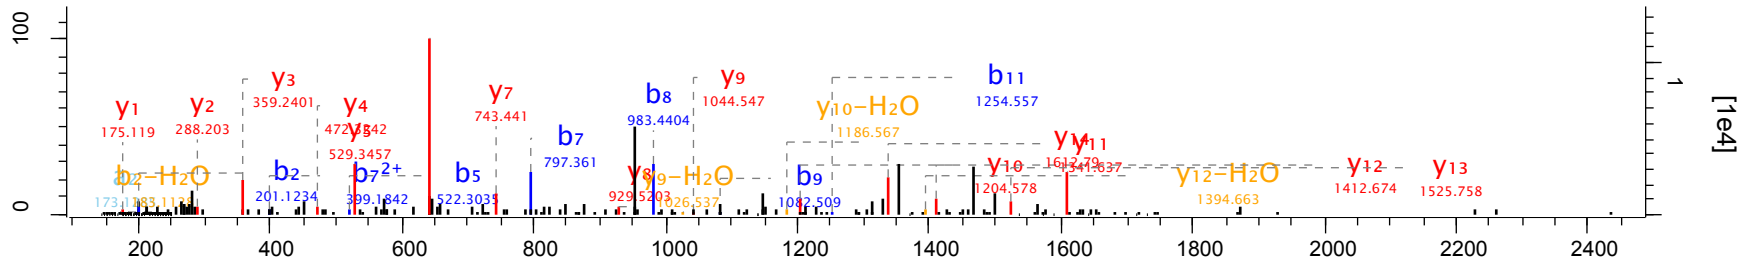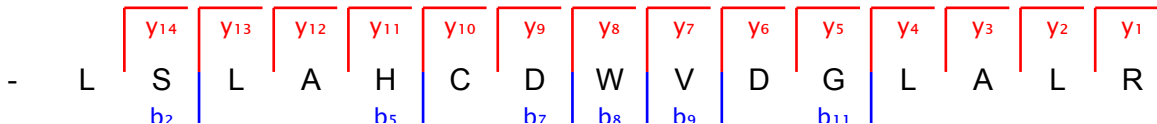

| Raw file                         | Scan  | Method   | Score | m/z     | Gene names    |
|----------------------------------|-------|----------|-------|---------|---------------|
| 20150226_Hela_Top_opt_A3_01_1593 | 58360 | TOF; CID | 85.19 | 1066.81 | TVP23B;TVP23C |

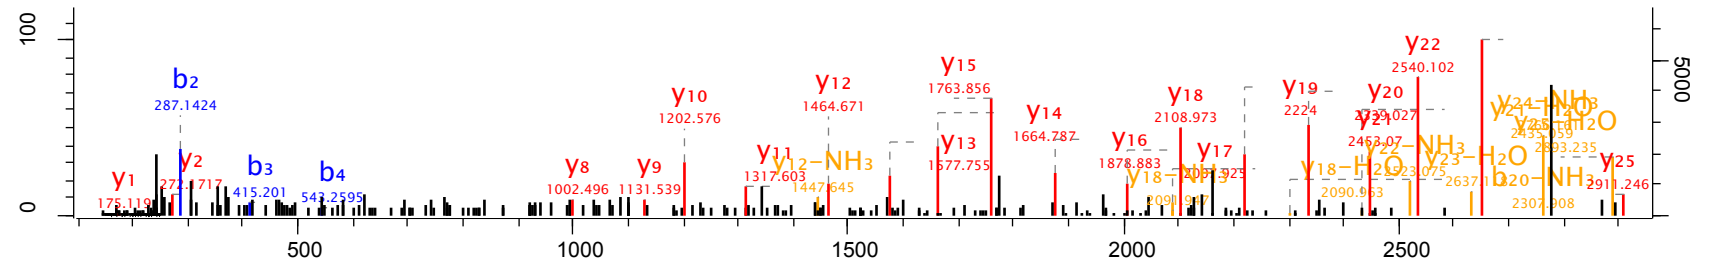

ac

- M L Q Q D S N D D T E D V S L F D A E E E

h<sub>2</sub> h<sub>3</sub> h<sub>4</sub>

y<sub>25</sub> y<sub>23</sub> y<sub>22</sub> y<sub>21</sub> y<sub>20</sub> y<sub>19</sub> y<sub>18</sub> y<sub>17</sub> y<sub>16</sub> y<sub>15</sub> y<sub>14</sub> y<sub>13</sub> y<sub>12</sub> y<sub>11</sub> y<sub>10</sub> y<sub>9</sub> y<sub>8</sub>

Raw file

20150226\_Hela\_Top\_opt\_A3\_01\_1593

Scan

59325

Method

TOF; CID

Score

93.48

m/z

853.93

Gene names

MTMR12

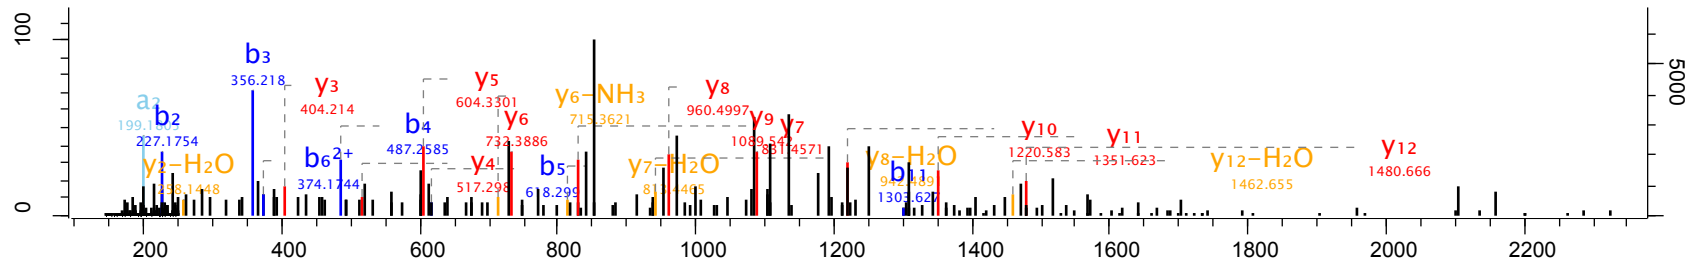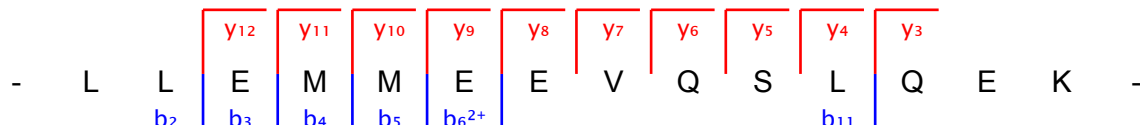

| Raw file                         | Scan  | Method   | Score | m/z     | Gene names |
|----------------------------------|-------|----------|-------|---------|------------|
| 20150226_Hela_Top_opt_A3_01_1593 | 60357 | TOF; CID | 85.2  | 1007.48 | CCDC134    |

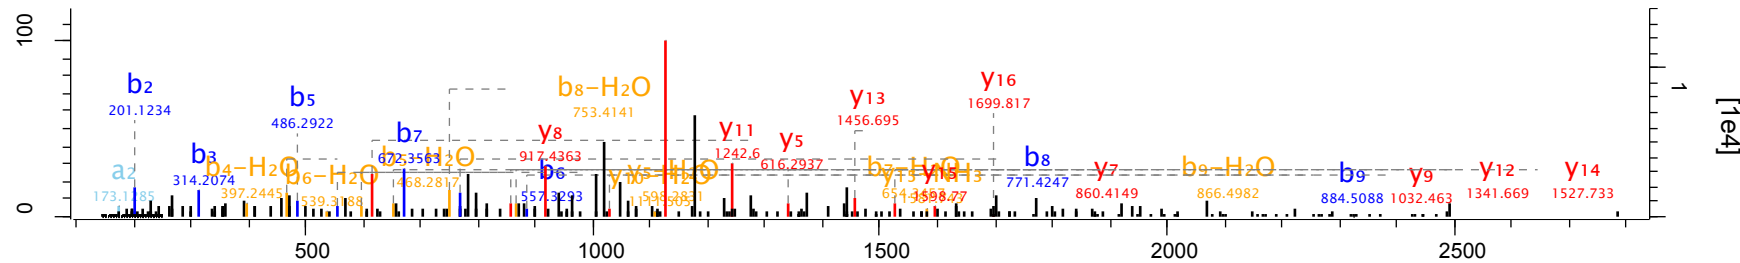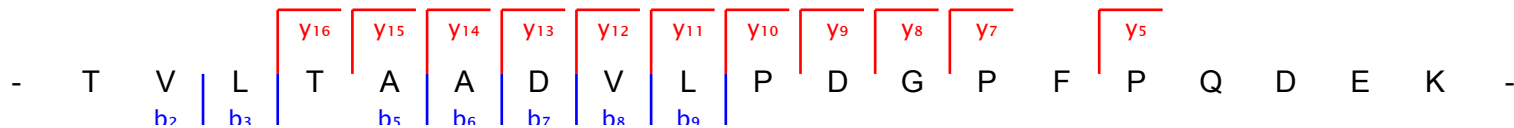



Raw file

20150226\_Hela\_Top\_opt\_A3\_01\_1593

Scan

60880

Method

TOF; CID

Score

70.39

m/z

915.82

Gene names

C19orf52

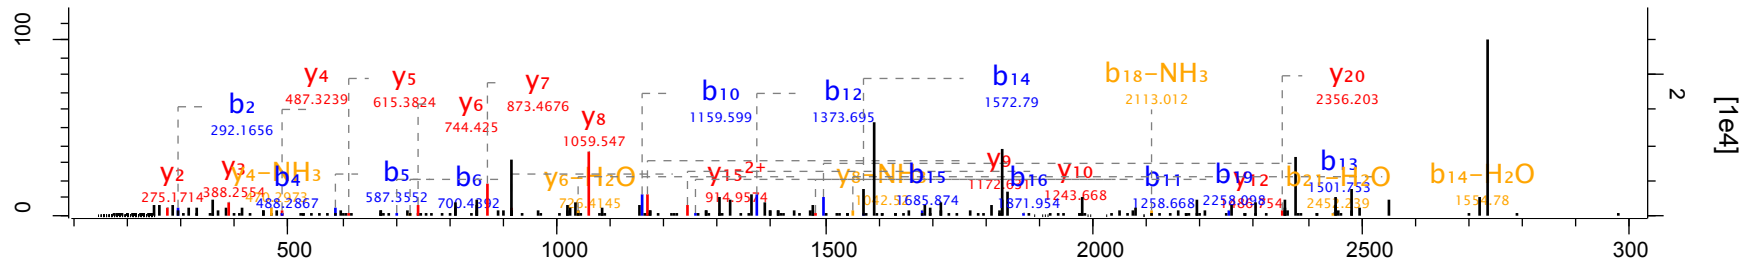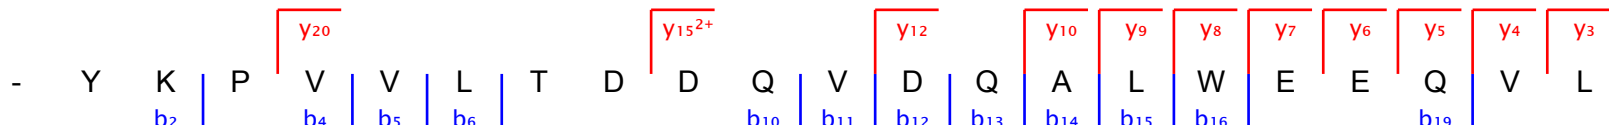

| Raw file                         | Scan  | Method   | Score | m/z    | Gene names |
|----------------------------------|-------|----------|-------|--------|------------|
| 20150226_Hela_Top_opt_A3_01_1593 | 61565 | TOF; CID | 91.78 | 460.75 | TMEM50A    |

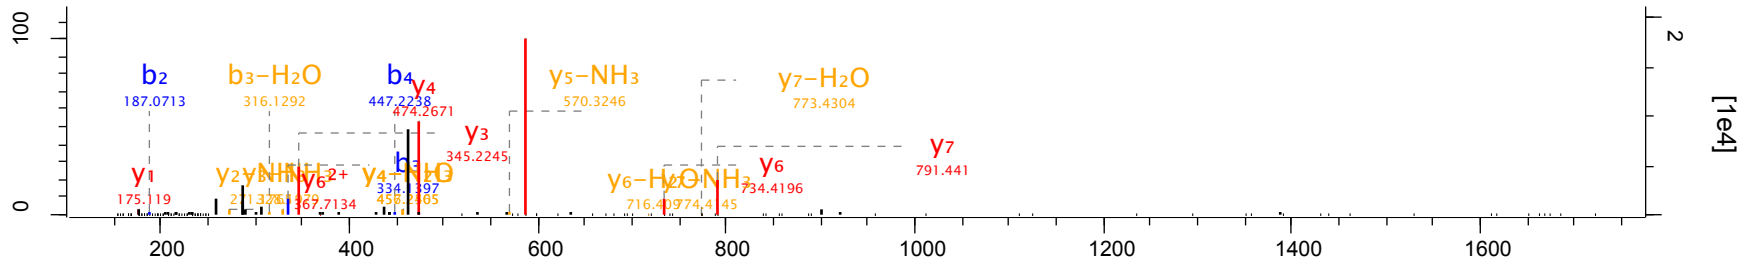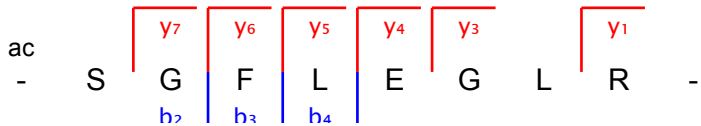

| Raw file                         | Scan  | Method   | Score | m/z    | Gene names |
|----------------------------------|-------|----------|-------|--------|------------|
| 20150226_Hela_Top_opt_A3_01_1593 | 61666 | TOF; CID | 57.41 | 768.37 | KIN        |

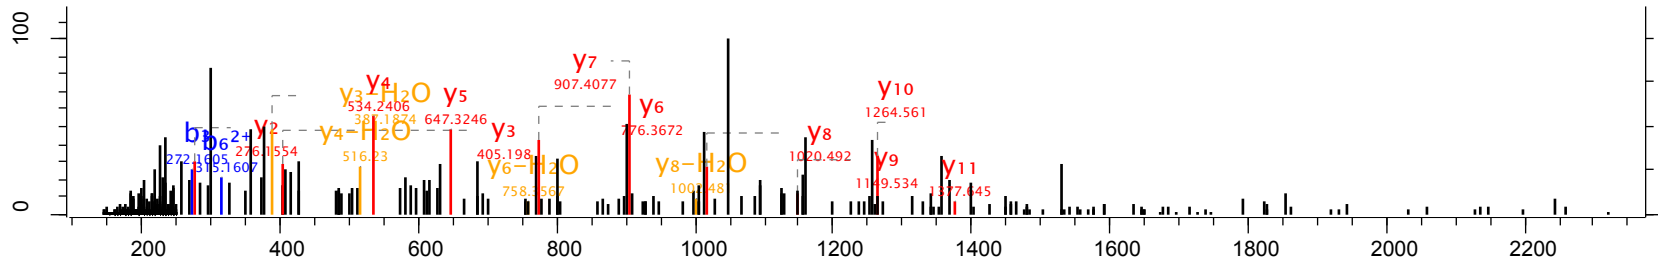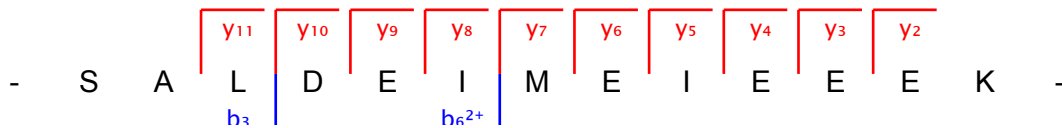

| Raw file                         | Scan  | Method   | Score  | m/z    | Gene names |
|----------------------------------|-------|----------|--------|--------|------------|
| 20150226_Hela_Top_opt_A3_01_1593 | 61743 | TOF; CID | 100.43 | 933.43 | PITPNC1    |

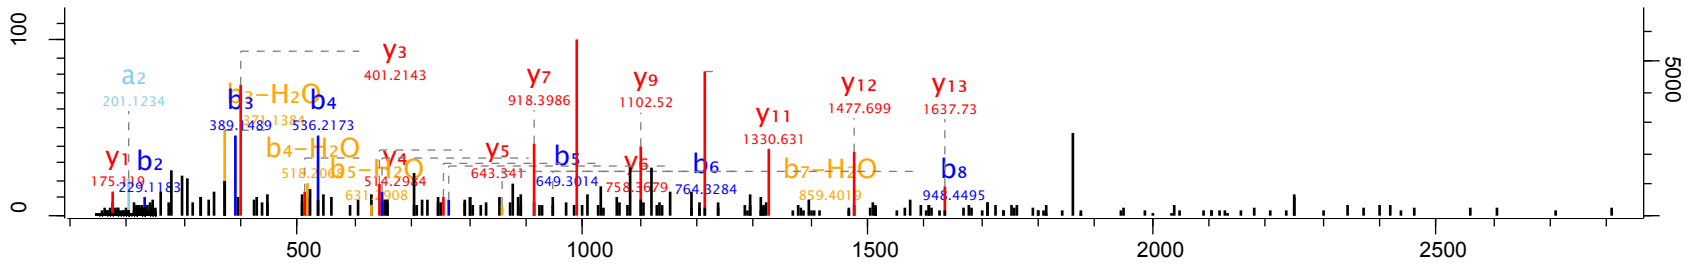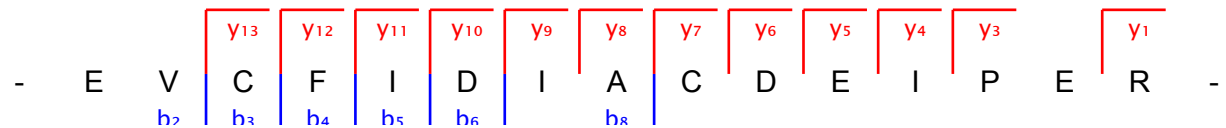

| Raw file                         | Scan  | Method   | Score | m/z    | Gene names |
|----------------------------------|-------|----------|-------|--------|------------|
| 20150226_Hela_Top_opt_A3_01_1593 | 62374 | TOF; CID | 58.46 | 908.46 | GALNS      |

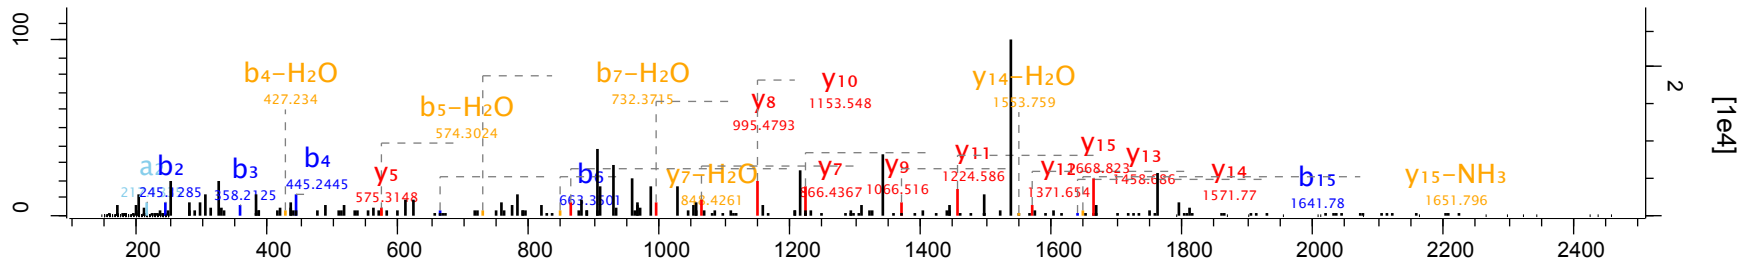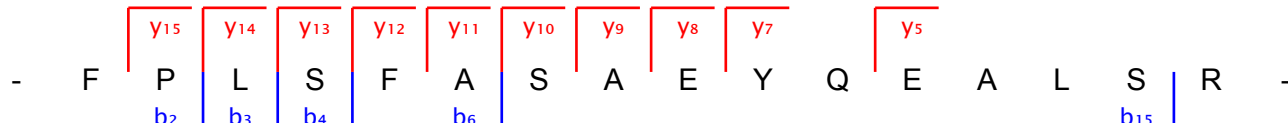

Raw file

20150226\_Hela\_Top\_opt\_A3\_01\_1593

Scan

62654

Method

TOF; CID

Score

65.18

m/z

707.39

Gene names

TEX11

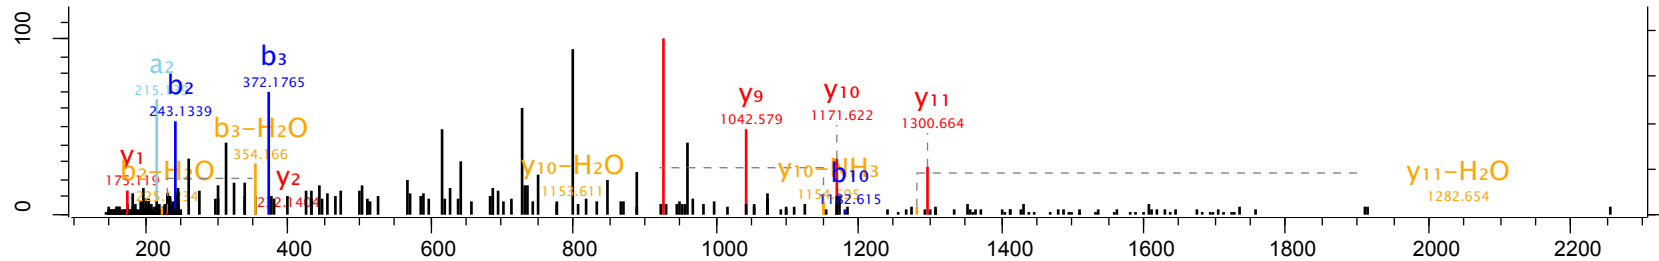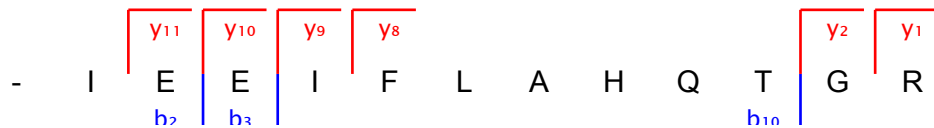

Raw file

20150226\_Hela\_Top\_opt\_A3\_01\_1593

Scan

63291

Method

TOF; CID

Score

43.7

m/z

679.38

Gene names

PIK3R2

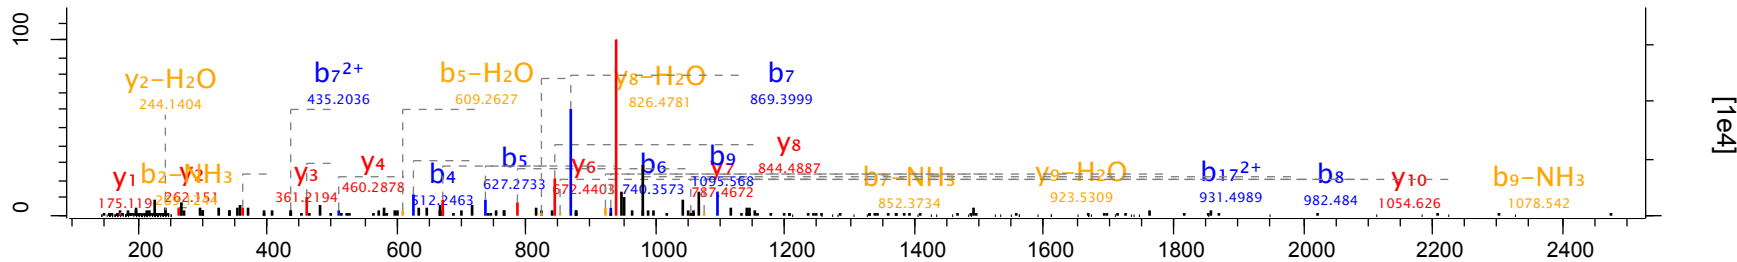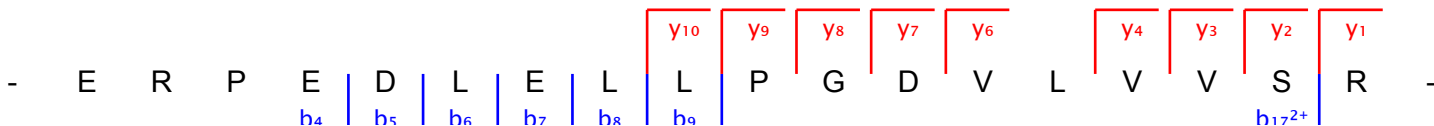

| Raw file                         | Scan  | Method   | Score | m/z    | Gene names |
|----------------------------------|-------|----------|-------|--------|------------|
| 20150226_Hela_Top_opt_A3_01_1593 | 64406 | TOF; CID | 88.39 | 943.48 | GLCE       |

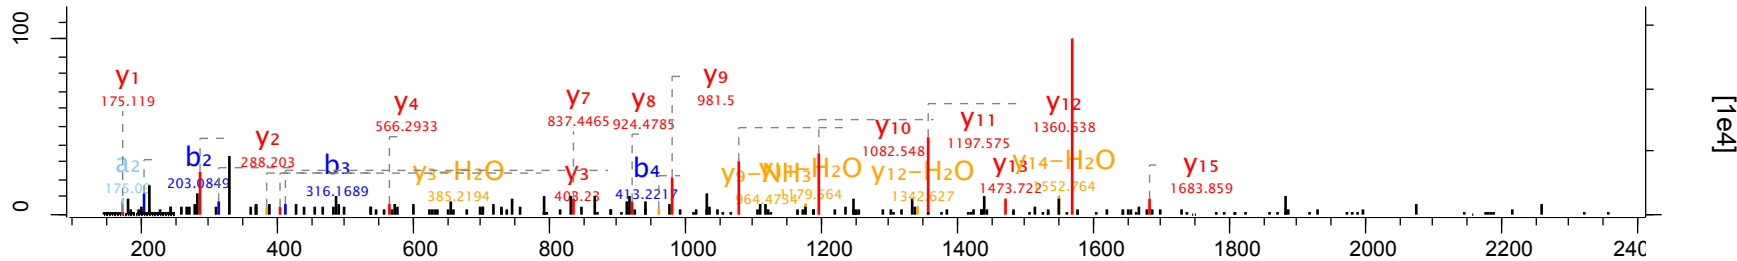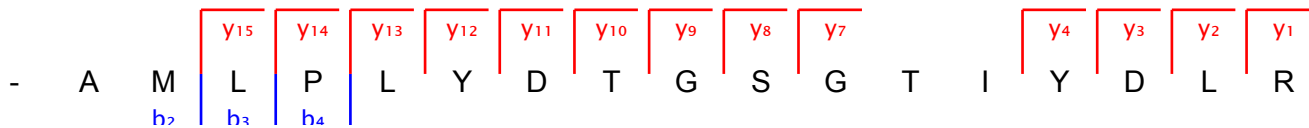





Raw file

20150226\_Hela\_Top\_opt\_A3\_01\_1593

Scan

64711

Method

TOF; CID

Score

56.71

m/z

1096.53

Gene names

DPH2

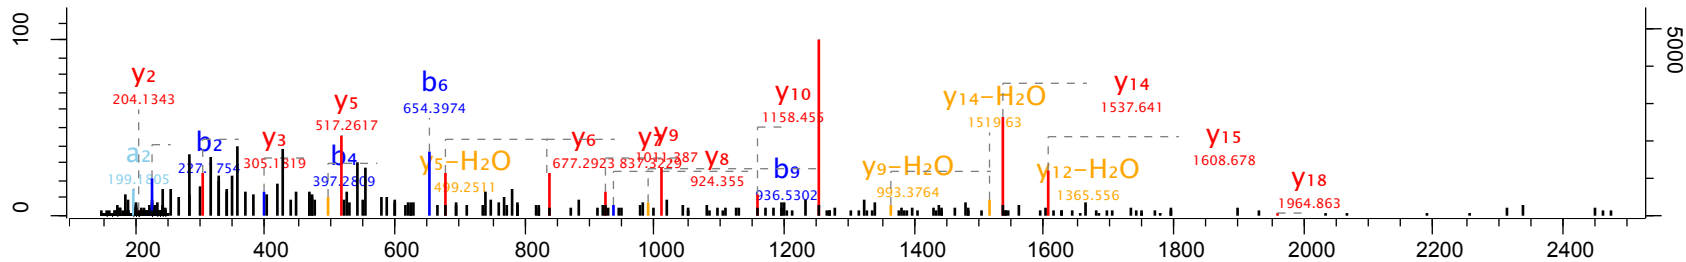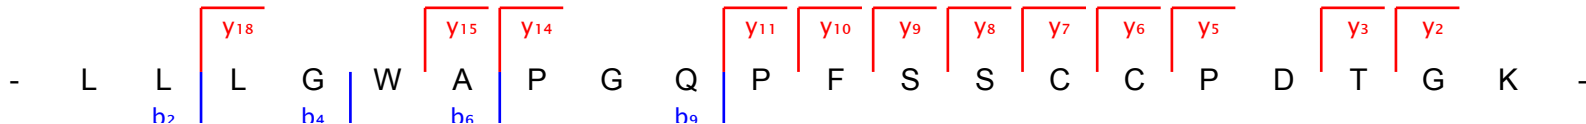

Raw file

20150226\_Hela\_Top\_opt\_A3\_01\_1593

Scan

64974

Method

TOF; CID

Score

59.37

m/z

930.51

Gene names

ABHD17B

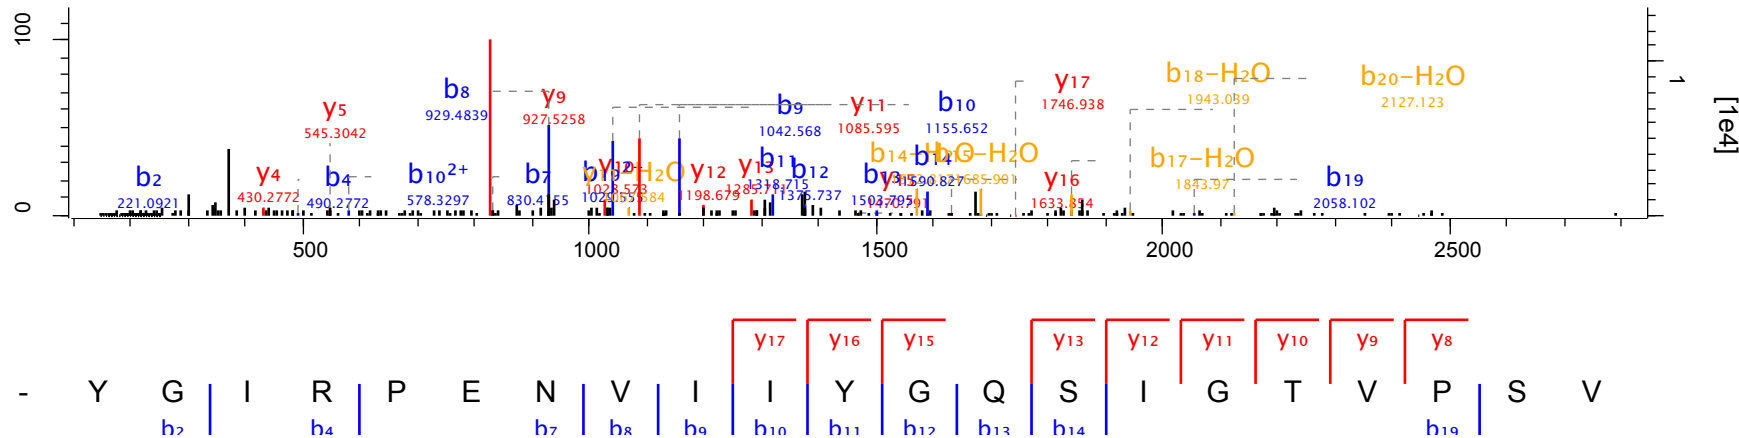

| Raw file                         | Scan  | Method   | Score | m/z    | Gene names |
|----------------------------------|-------|----------|-------|--------|------------|
| 20150226_Hela_Top_opt_A3_01_1593 | 65073 | TOF; CID | 82.65 | 815.92 | ANAPC16    |

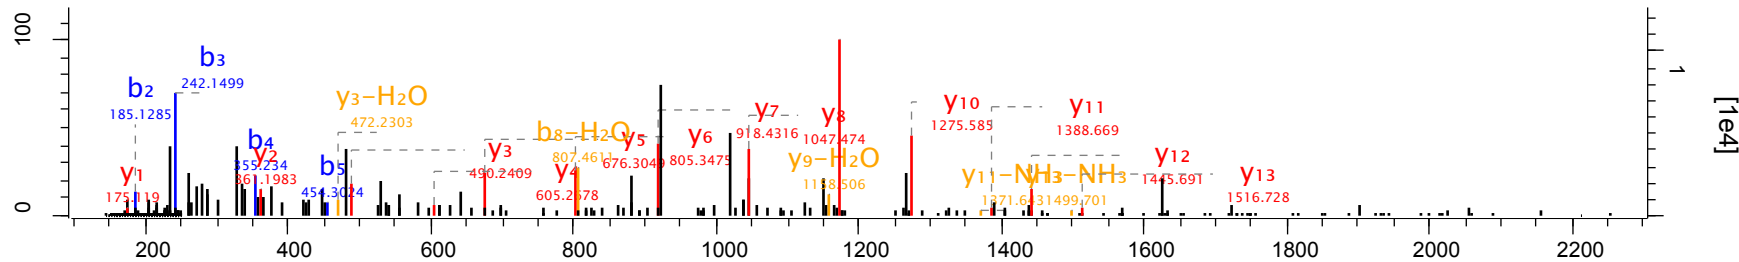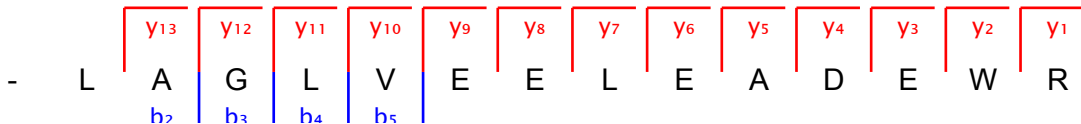

| Raw file                         | Scan  | Method   | Score | m/z    | Gene names |
|----------------------------------|-------|----------|-------|--------|------------|
| 20150226_Hela_Top_opt_A3_01_1593 | 65180 | TOF; CID | 79.84 | 961.47 | DEGS1      |

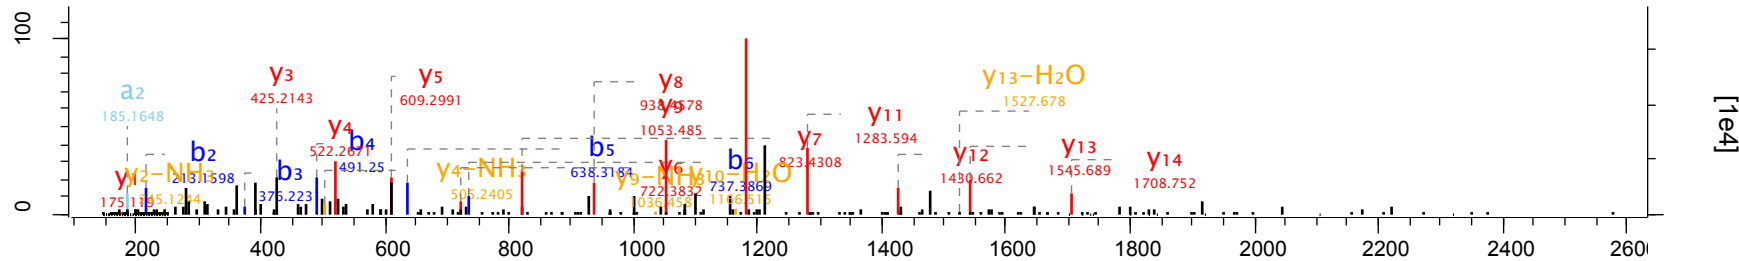

- V L Y D F V M D D T I S P Y S R -  
 b<sub>2</sub> b<sub>3</sub> b<sub>4</sub> b<sub>5</sub> b<sub>6</sub>  
 y<sub>14</sub> y<sub>13</sub> y<sub>12</sub> y<sub>11</sub> y<sub>10</sub> y<sub>9</sub> y<sub>8</sub> y<sub>7</sub> y<sub>6</sub> y<sub>5</sub> y<sub>4</sub> y<sub>3</sub> y<sub>1</sub>

| Raw file                         | Scan  | Method   | Score | m/z    | Gene names |
|----------------------------------|-------|----------|-------|--------|------------|
| 20150226_Hela_Top_opt_A3_01_1593 | 65414 | TOF; CID | 36.17 | 1207.6 | USP34      |

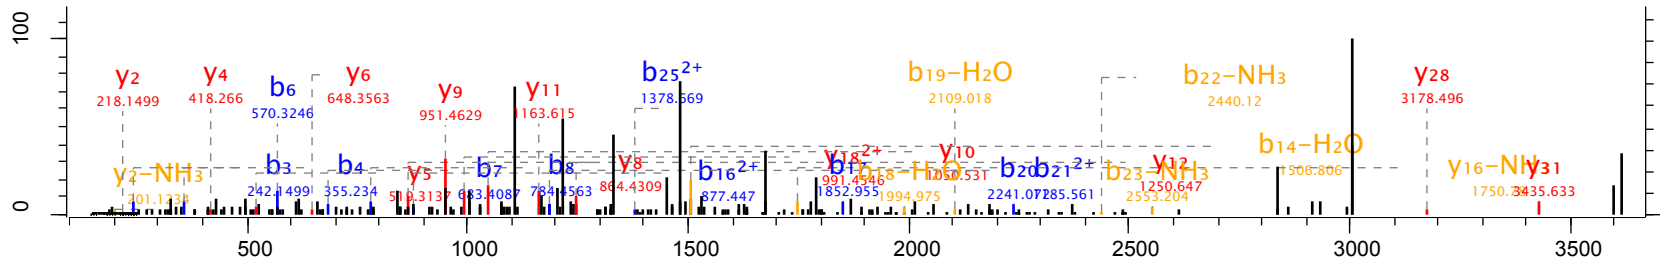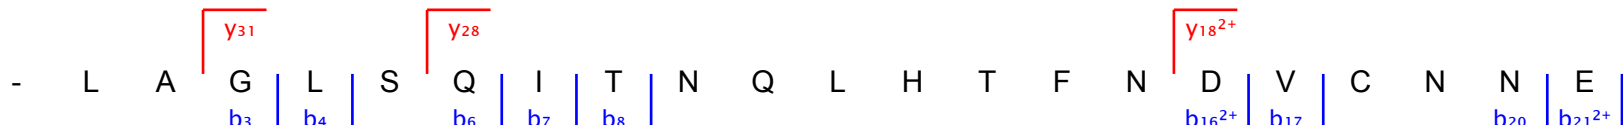

Raw file

20150226\_Hela\_Top\_opt\_A3\_01\_1593

Scan

66533

Method

TOF; CID

Score

125.23

m/z

660.37

Gene names

DFFB

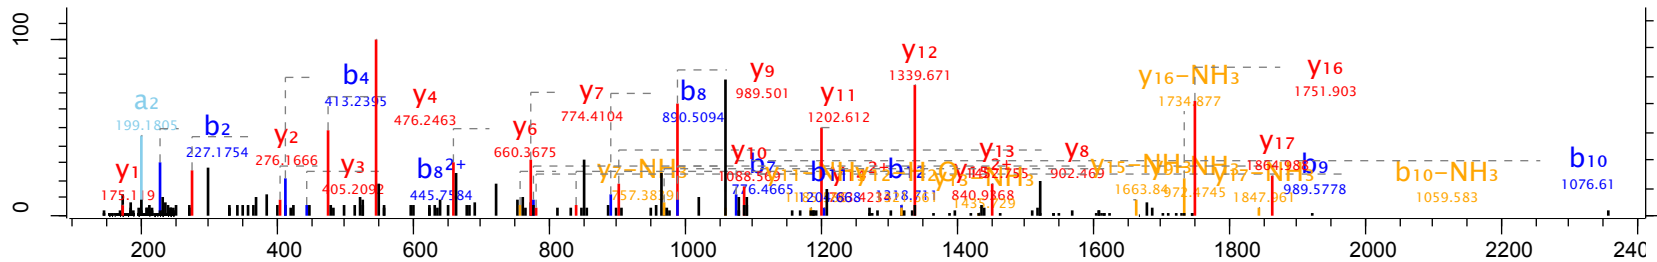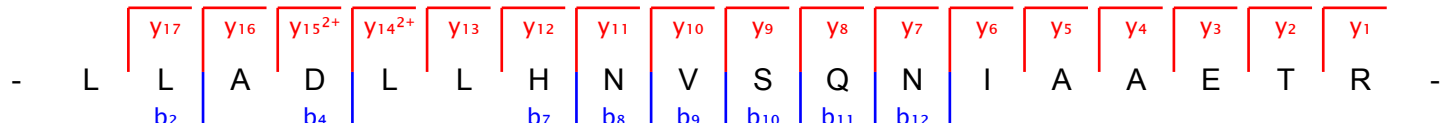

Raw file

Scan

Method

Score

m/z

Gene names

20150226\_Hela\_Top\_opt\_A3\_01\_1593

66693

TOF; CID

87.74

805.9

MID1P1

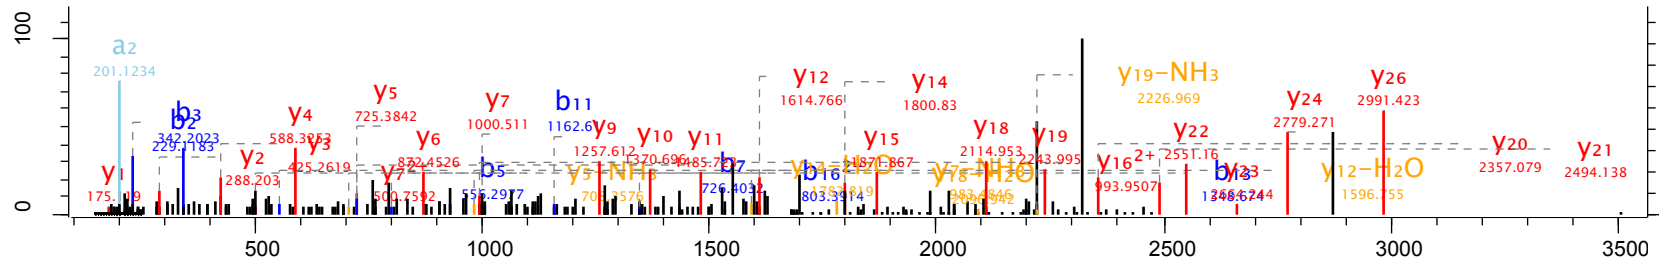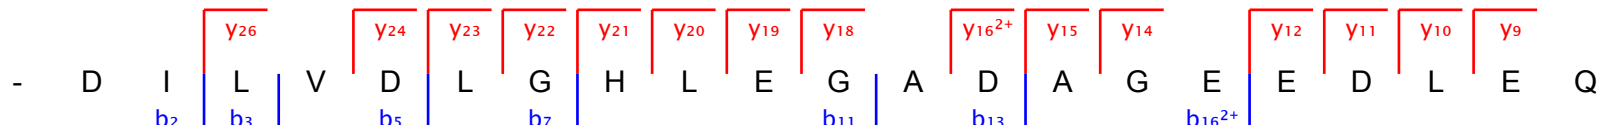



| Raw file                         | Scan  | Method   | Score | m/z    | Gene names |
|----------------------------------|-------|----------|-------|--------|------------|
| 20150226_Hela_Top_opt_A3_01_1593 | 67336 | TOF; CID | 47.04 | 792.42 | CCDC91     |

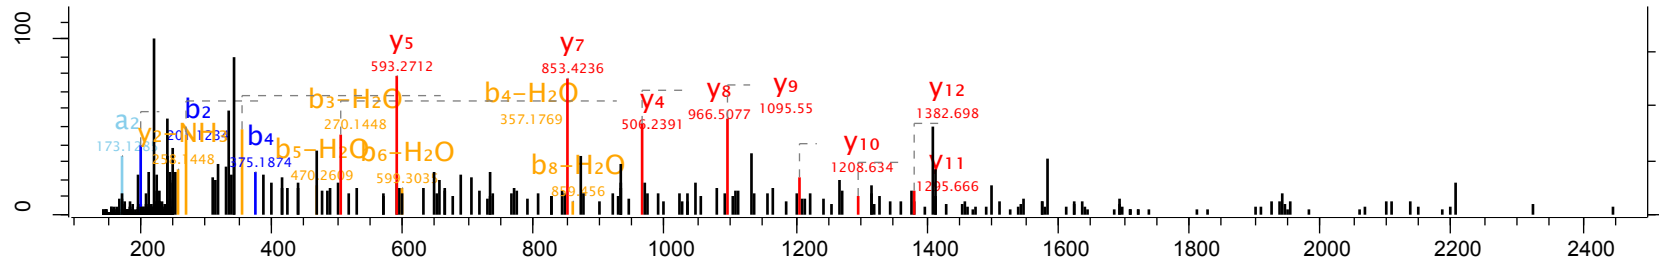

- S L S S L E L F L S C A Q K -  
 b2 b4  
 y12 y11 y10 y9 y8 y7 y5 y4

Raw file

20150226\_Hela\_Top\_opt\_A3\_01\_1593

Scan

67444

Method

TOF; CID

Score

96.13

m/z

820.42

Gene names

FAM73A

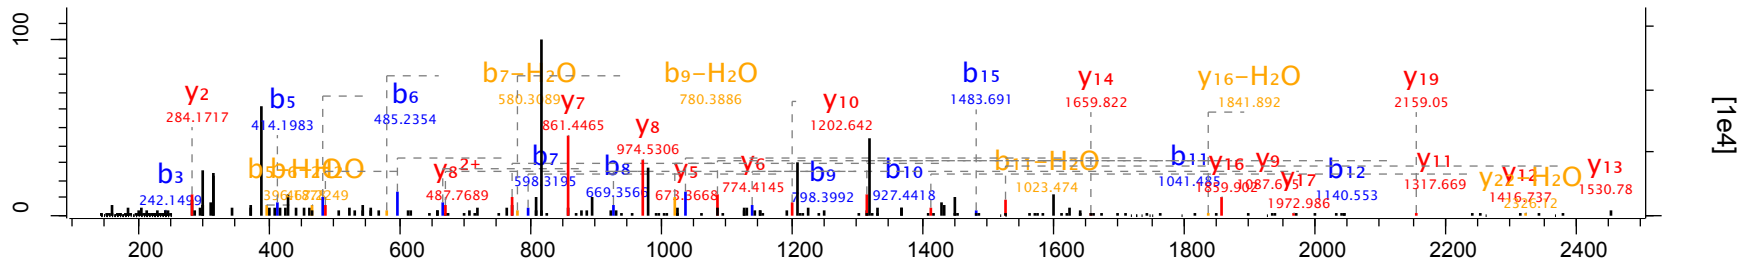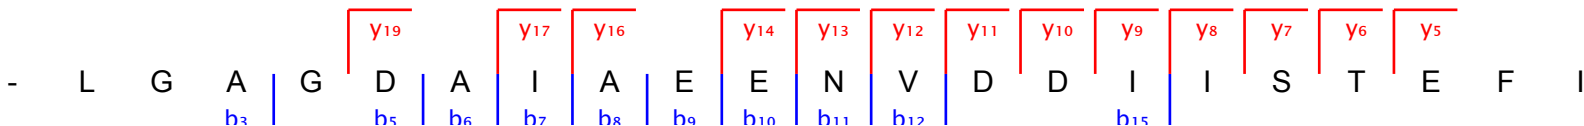

| Raw file                         | Scan  | Method   | Score | m/z | Gene names |
|----------------------------------|-------|----------|-------|-----|------------|
| 20150226_Hela_Top_opt_A3_01_1593 | 67646 | TOF; CID | 79.68 | 923 | RINT1      |

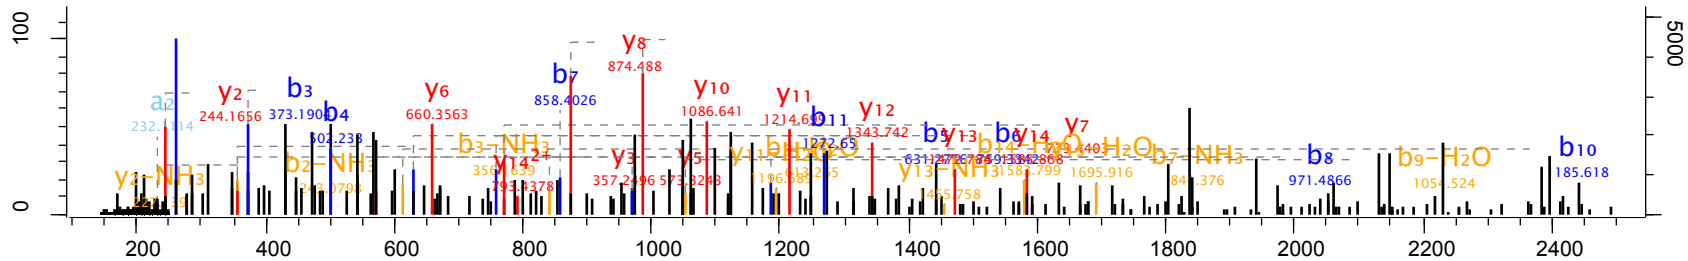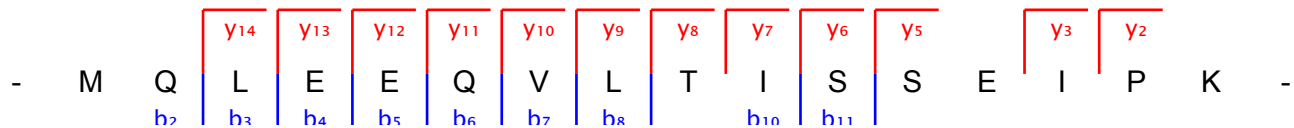

| Raw file                         | Scan  | Method   | Score | m/z    | Gene names |
|----------------------------------|-------|----------|-------|--------|------------|
| 20150226_Hela_Top_opt_A3_01_1593 | 68386 | TOF; CID | 91.32 | 990.01 | BTBD1      |

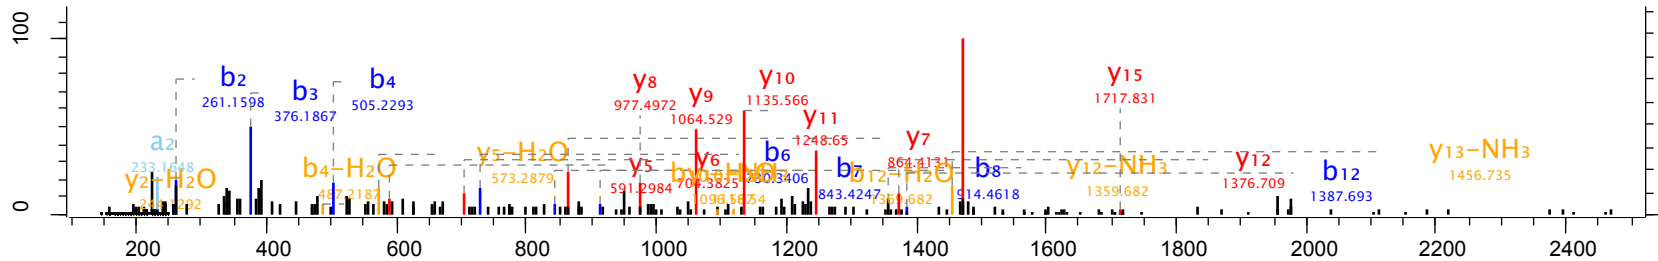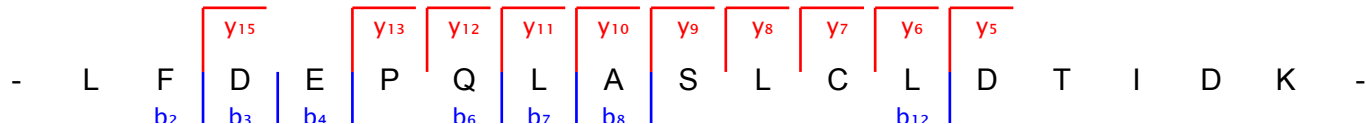

Raw file

20150226\_Hela\_Top\_opt\_A3\_01\_1593

Scan

69026

Method

TOF; CID

Score

119.51

m/z

663.67

Gene names

ABRACL

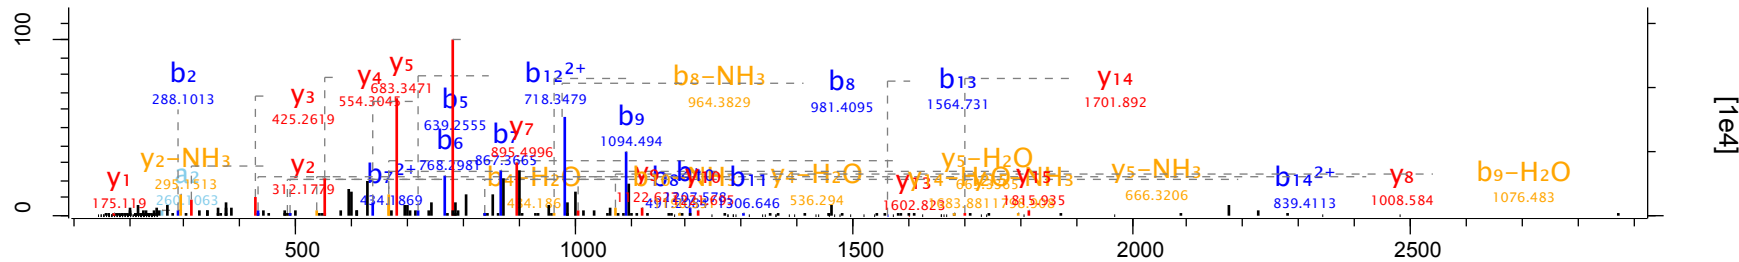

ac

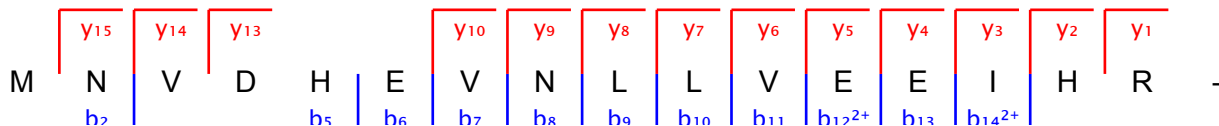

| Raw file                         | Scan  | Method   | Score | m/z    | Gene names |
|----------------------------------|-------|----------|-------|--------|------------|
| 20150226_Hela_Top_opt_A3_01_1593 | 69087 | TOF; CID | 74.79 | 842.45 | CIB1       |

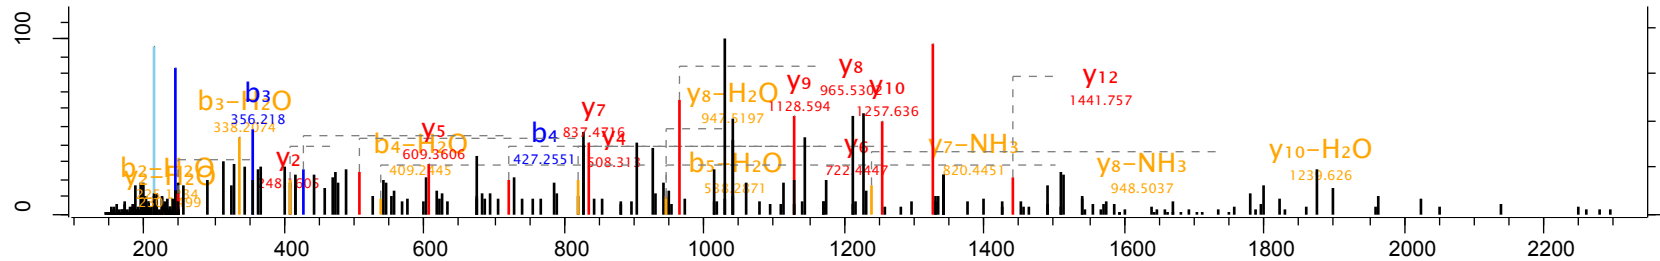

- E L L A E Y Q D L T F L T K -

          b<sub>2</sub> b<sub>3</sub> b<sub>4</sub>

          y<sub>12</sub> y<sub>11</sub> y<sub>10</sub> y<sub>9</sub> y<sub>8</sub> y<sub>7</sub> y<sub>6</sub> y<sub>5</sub> y<sub>4</sub> y<sub>2</sub>

| Raw file                         | Scan  | Method   | Score | m/z     | Gene names |
|----------------------------------|-------|----------|-------|---------|------------|
| 20150226_Hela_Top_opt_A3_01_1593 | 69126 | TOF; CID | 38.33 | 1104.55 | ANAPC15    |

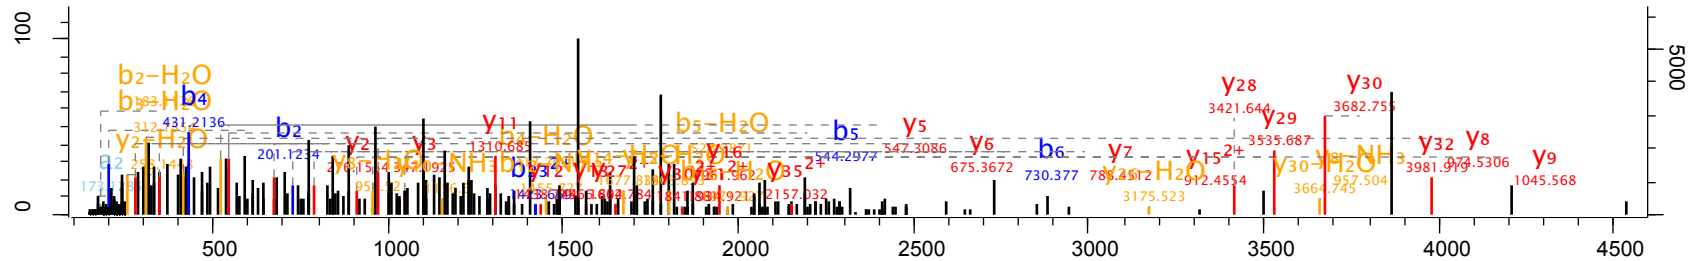

- V T E T L W F N L D R P C V E E T E L Q Q  
     |   |   |   |   |   |   |   |   |   |   |   |   |   |   |   |   |   |   |  
     b<sub>2</sub> b<sub>4</sub> b<sub>5</sub> b<sub>6</sub> y<sub>35</sub><sup>2+</sup> y<sub>32</sub> y<sub>31</sub><sup>2+</sup> y<sub>30</sub> y<sub>29</sub> y<sub>28</sub> y<sub>27</sub><sup>2+</sup> y<sub>16</sub>

Raw file

20150226\_Hela\_Top\_opt\_A3\_01\_1593

Scan

69609

Method

TOF; CID

Score

96.85

m/z

816.12

Gene names

HERC2

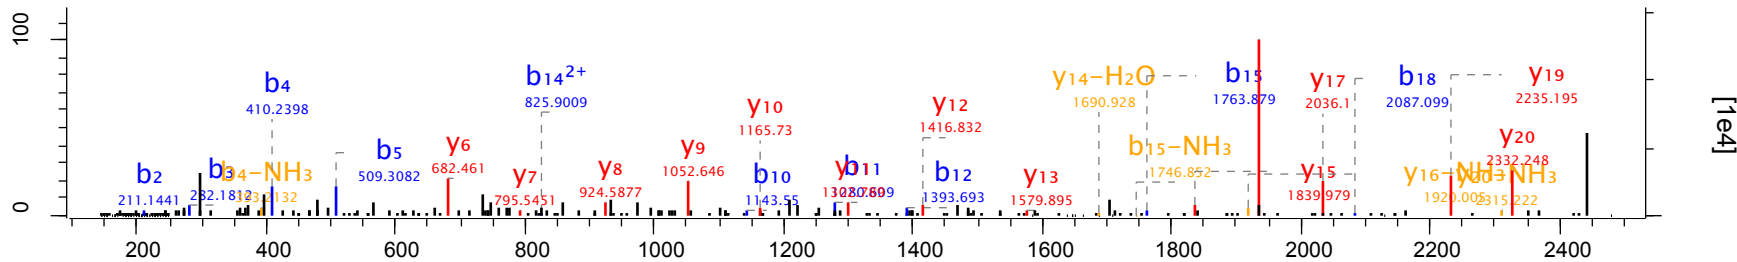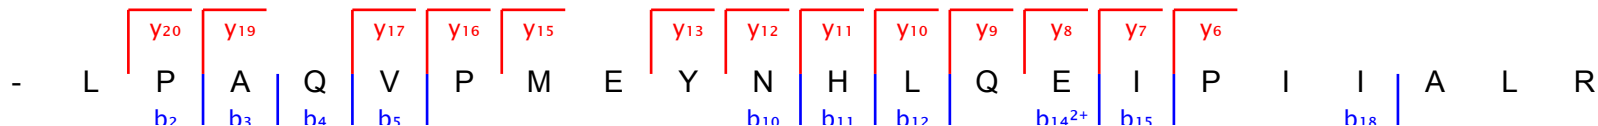



| Raw file                         | Scan  | Method   | Score  | m/z    | Gene names |
|----------------------------------|-------|----------|--------|--------|------------|
| 20150226_Hela_Top_opt_A3_01_1593 | 69982 | TOF; CID | 100.76 | 823.43 | SAMD9      |

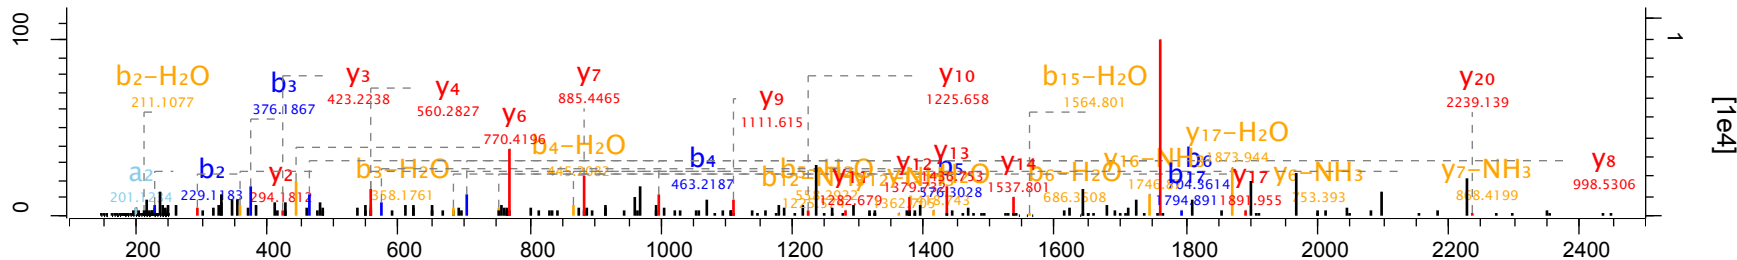

- L D F S L Q P E T G P G N L I D P I H E F  
           b<sub>2</sub> b<sub>3</sub> b<sub>4</sub> b<sub>5</sub> b<sub>6</sub> b<sub>17</sub>  
                   y<sub>20</sub> y<sub>17</sub> y<sub>16</sub> y<sub>14</sub> y<sub>13</sub> y<sub>12</sub> y<sub>11</sub> y<sub>10</sub> y<sub>9</sub> y<sub>8</sub> y<sub>7</sub> y<sub>6</sub> y<sub>4</sub> y<sub>3</sub> y<sub>2</sub>

Raw file

20150226\_Hela\_Top\_opt\_A3\_01\_1593

Scan

70366

Method

TOF; CID

Score

38.48

m/z

982.51

Gene names

TSKU

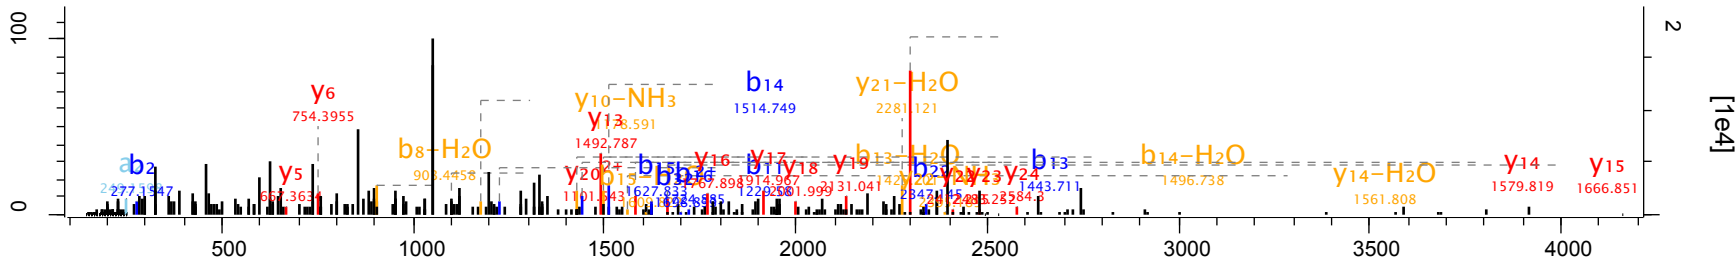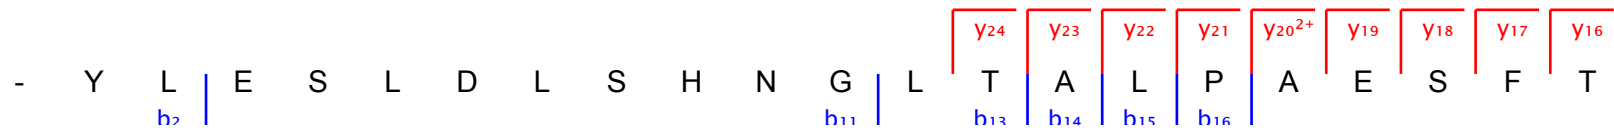

Raw file

20150226\_Hela\_Top\_opt\_A3\_01\_1593

Scan

70537

Method

TOF; CID

Score

43.31

m/z

953.83

Gene names

ALG2

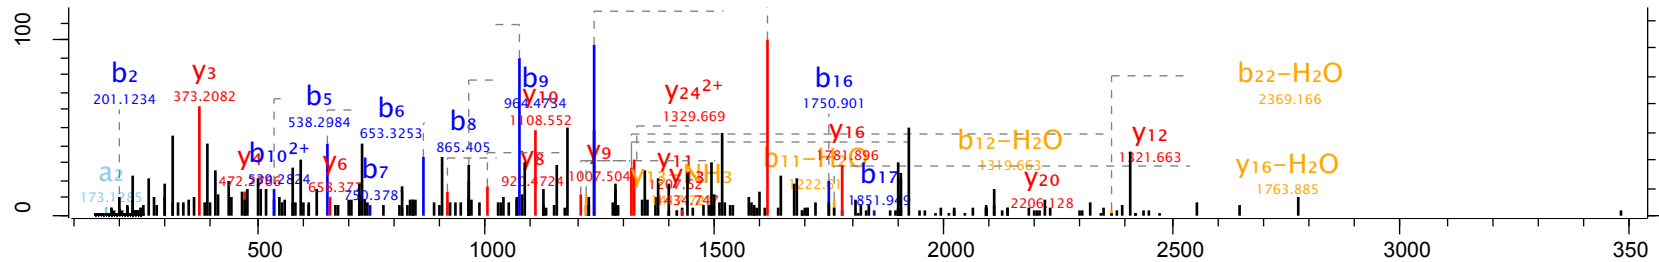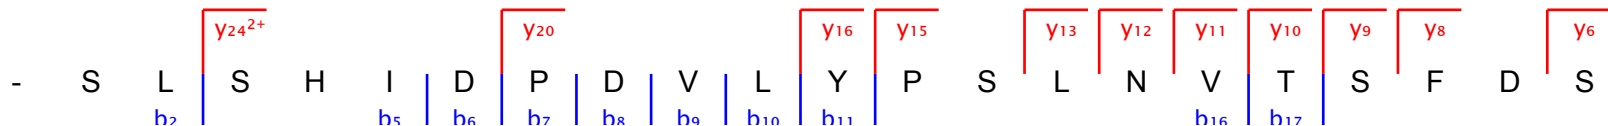

| Raw file                         | Scan  | Method   | Score | m/z     | Gene names |
|----------------------------------|-------|----------|-------|---------|------------|
| 20150226_Hela_Top_opt_A3_01_1593 | 70633 | TOF; CID | 49.77 | 1051.04 | COX10      |

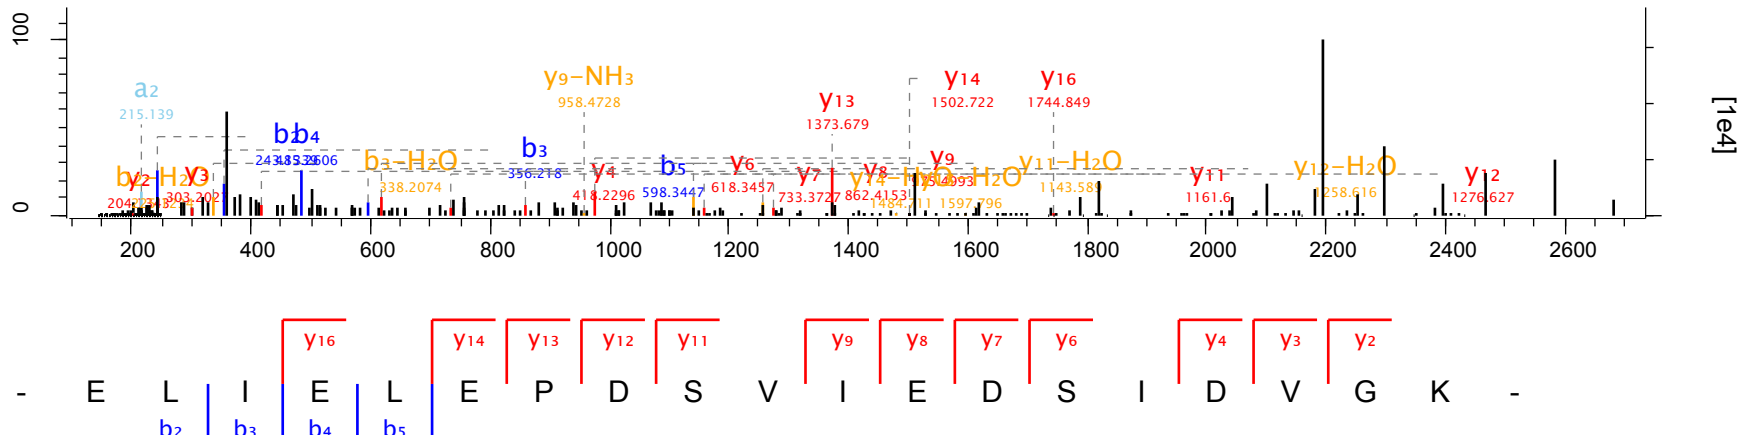

Raw file

20150226\_Hela\_Top\_opt\_A3\_01\_1593

Scan

71645

Method

TOF; CID

Score

42.62

m/z

1058.55

Gene names

UNC50

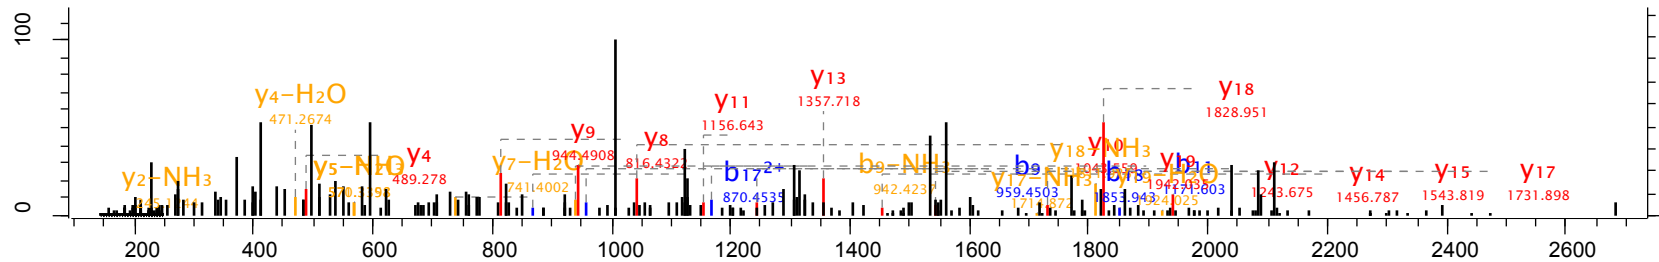

ac

- M L P S T S V N S L V Q G N G V L N S R -  
 y19 y18 y17 y15 y14 y13 y12 y11 y10 y9 y8 y4  
 h9 h11 h17<sup>2+</sup> h18

| Raw file                         | Scan  | Method   | Score | m/z    | Gene names  |
|----------------------------------|-------|----------|-------|--------|-------------|
| 20150226_Hela_Top_opt_A3_01_1593 | 72326 | TOF; CID | 85.49 | 614.33 | PDPK1;PDPK2 |

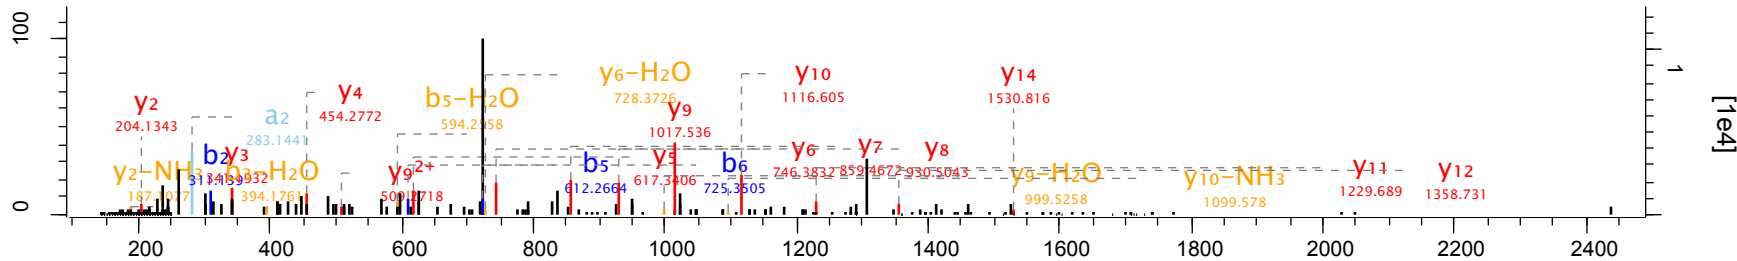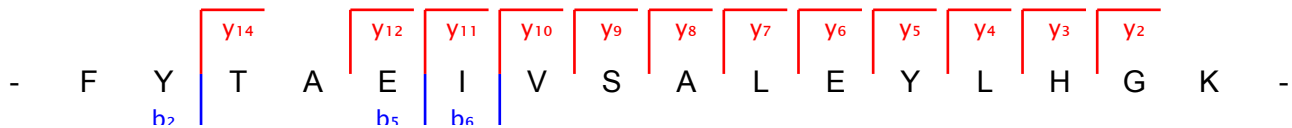

Raw file

20150226\_Hela\_Top\_opt\_A3\_01\_1593

Scan

72329

Method

TOF; CID

Score

43.84

m/z

1141.6

Gene names

BCHE

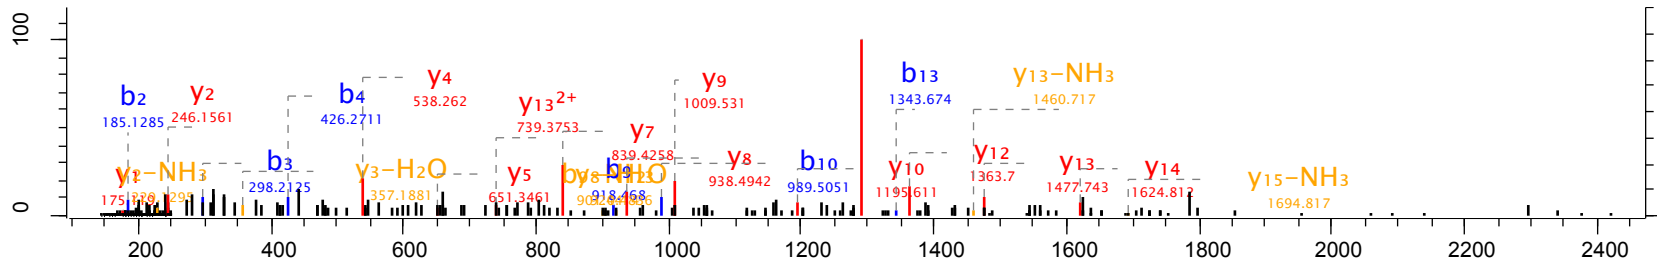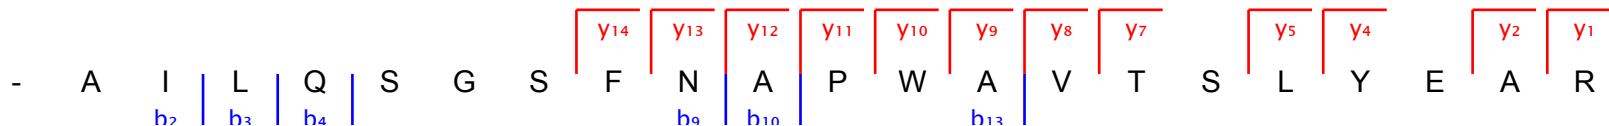

| Raw file                         | Scan  | Method   | Score | m/z    | Gene names |
|----------------------------------|-------|----------|-------|--------|------------|
| 20150226_Hela_Top_opt_A3_01_1593 | 73405 | TOF; CID | 95.5  | 737.05 | RALGAPB    |

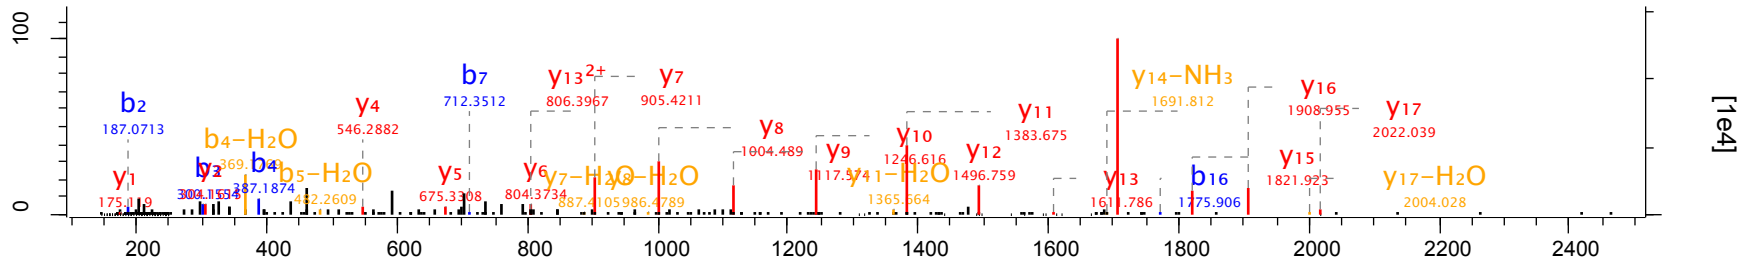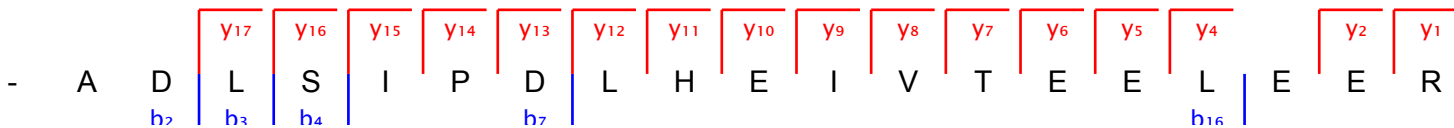



| Raw file                         | Scan  | Method   | Score | m/z    | Gene names |
|----------------------------------|-------|----------|-------|--------|------------|
| 20150226_Hela_Top_opt_A3_01_1593 | 74142 | TOF; CID | 74.61 | 608.38 | OCIAD2     |

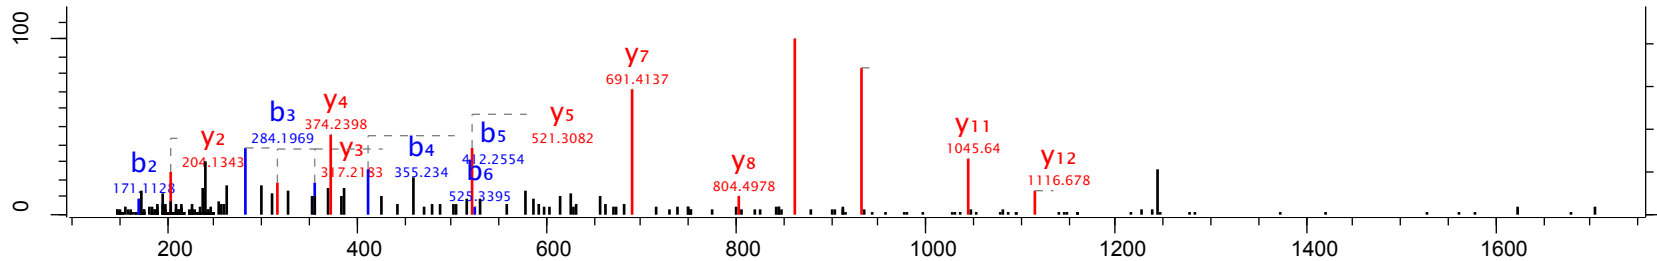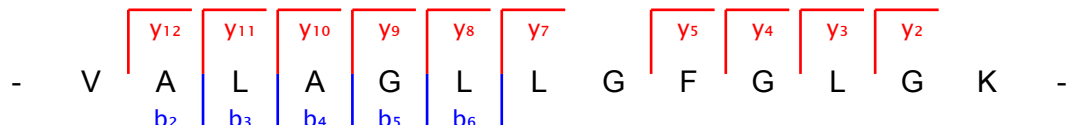

| Raw file                         | Scan  | Method   | Score | m/z    | Gene names |
|----------------------------------|-------|----------|-------|--------|------------|
| 20150226_Hela_Top_opt_A3_01_1593 | 74449 | TOF; CID | 51.73 | 719.88 | POLR3H     |

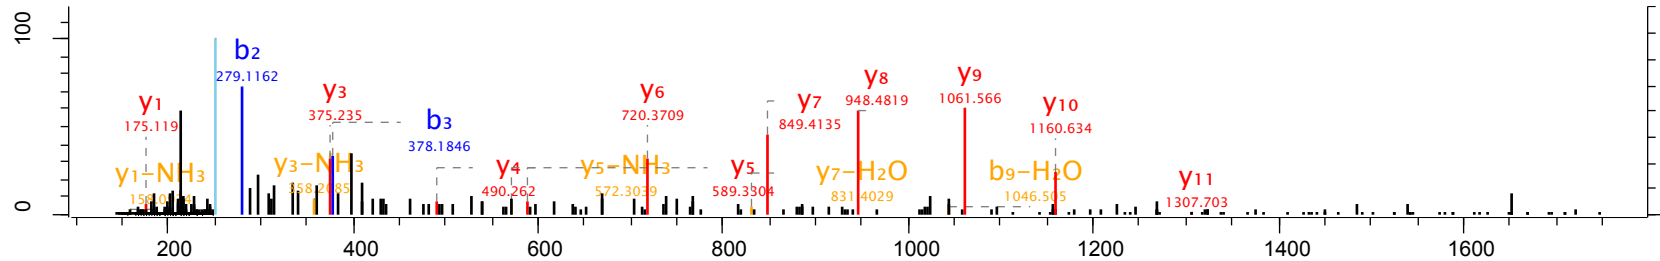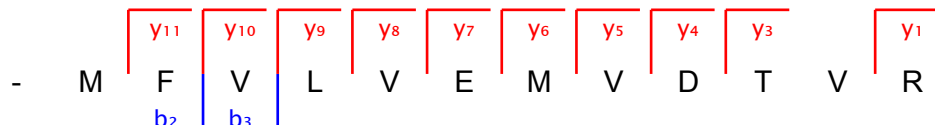

Raw file

20150226\_Hela\_Top\_opt\_A3\_01\_1593

Scan

75332

Method

TOF; CID

Score

70.06

m/z

1232.25

Gene names

TTPAL

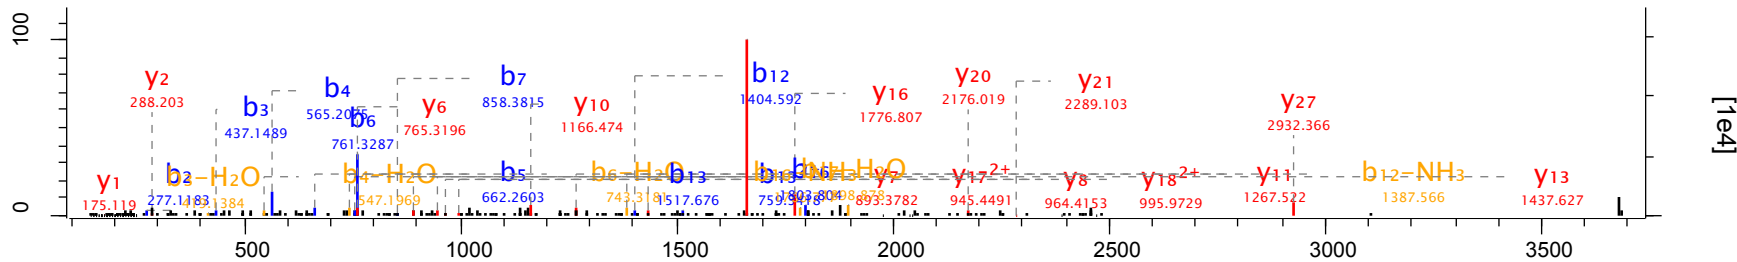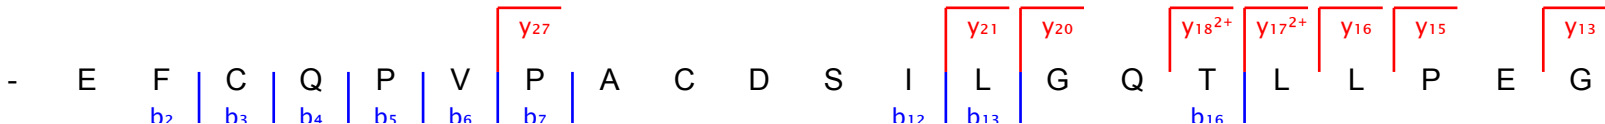

Raw file

Scan

Method

Score

m/z

Gene names

20150226\_Hela\_Top\_opt\_A3\_01\_1593

75371

TOF; CID

107.21

829.45

C11orf83

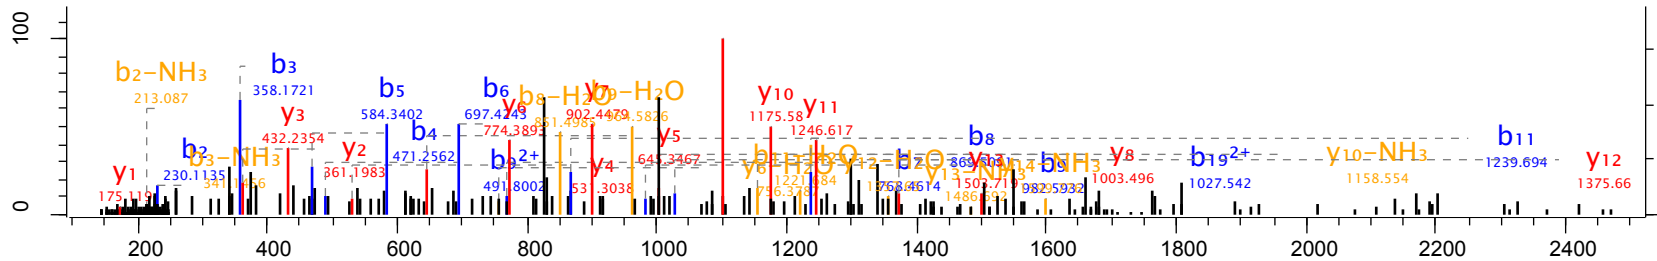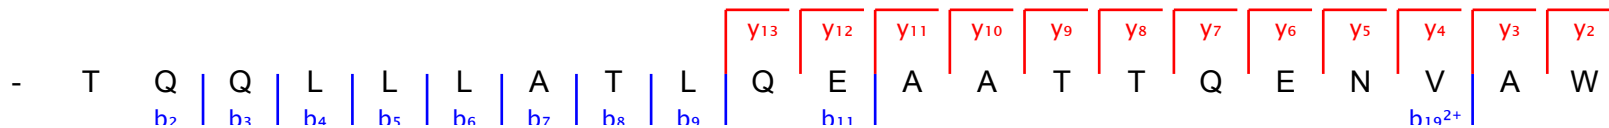

Raw file

20150226\_Hela\_Top\_opt\_A3\_01\_1593

Scan

75406

Method

TOF; CID

Score

87.35

m/z

820.03

Gene names

COL4A5

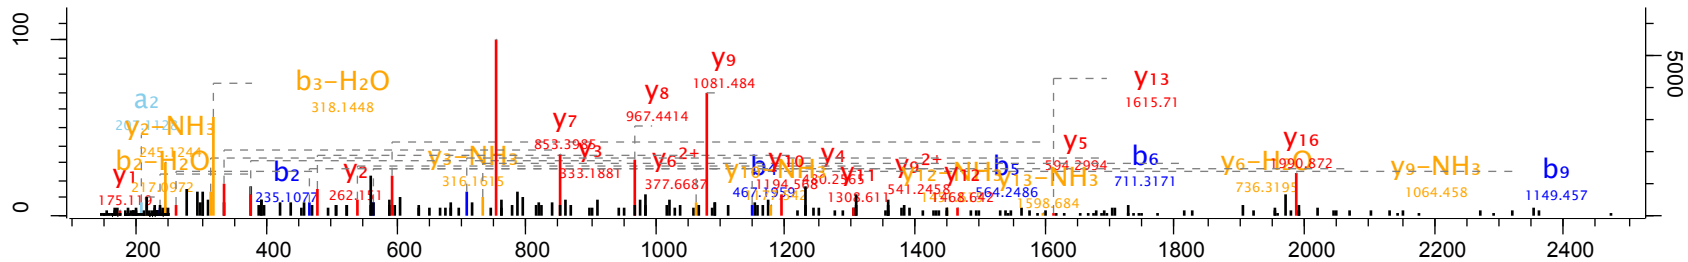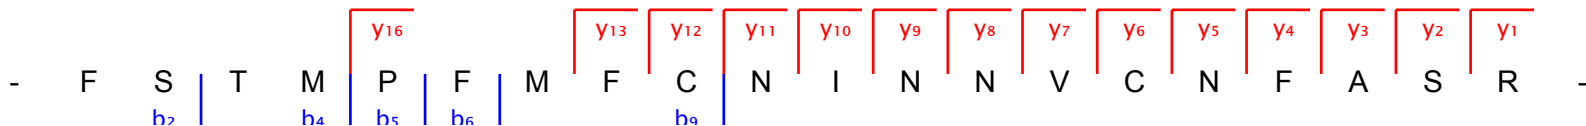

| Raw file                         | Scan  | Method   | Score | m/z    | Gene names |
|----------------------------------|-------|----------|-------|--------|------------|
| 20150226_Hela_Top_opt_A3_01_1593 | 75407 | TOF; CID | 47.61 | 652.87 | SLC1A3     |

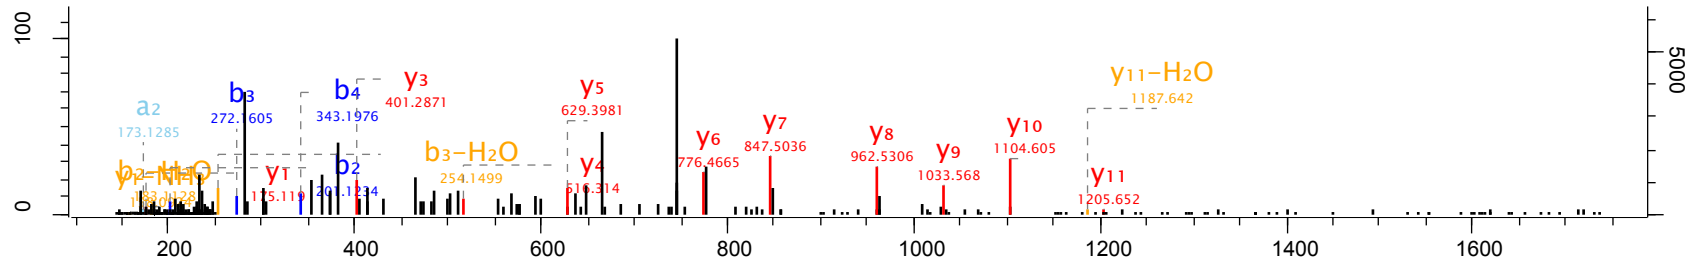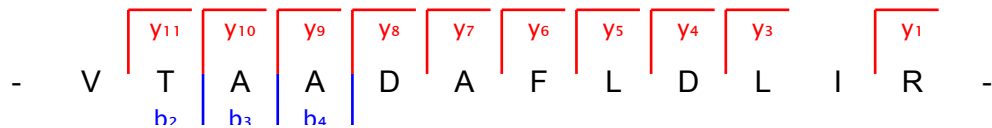

Raw file

20150226\_Hela\_Top\_opt\_A3\_01\_1593

Scan

75444

Method

TOF; CID

Score

66.15

m/z

742.7

Gene names

CLK3

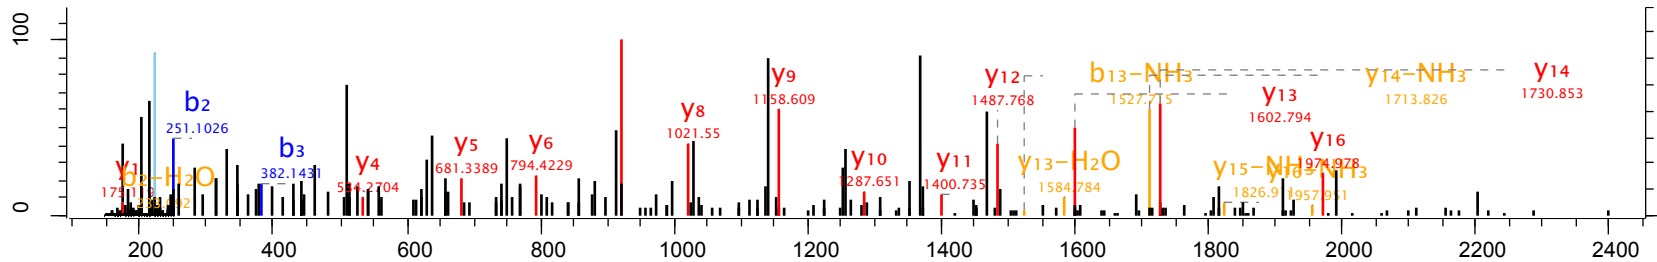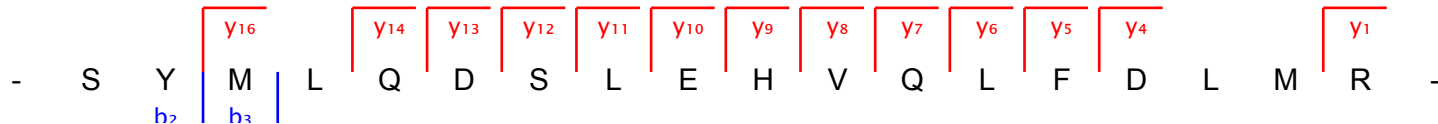

| Raw file                         | Scan  | Method   | Score | m/z    | Gene names |
|----------------------------------|-------|----------|-------|--------|------------|
| 20150226_Hela_Top_opt_A3_01_1593 | 75619 | TOF; CID | 92.94 | 837.95 | LPGAT1     |

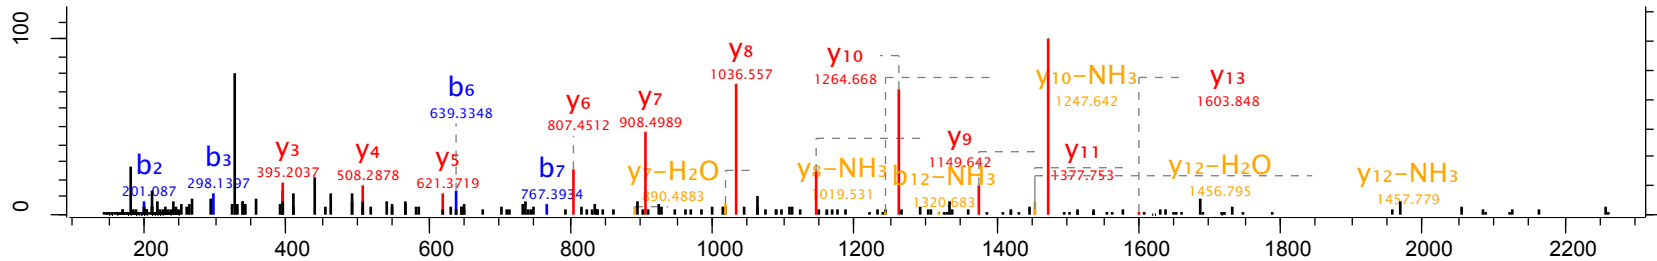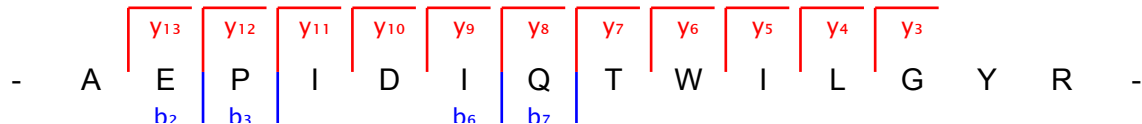



| Raw file                         | Scan  | Method   | Score | m/z    | Gene names |
|----------------------------------|-------|----------|-------|--------|------------|
| 20150226_Hela_Top_opt_A3_01_1593 | 77937 | TOF; CID | 53.68 | 907.81 | HIGD2A     |

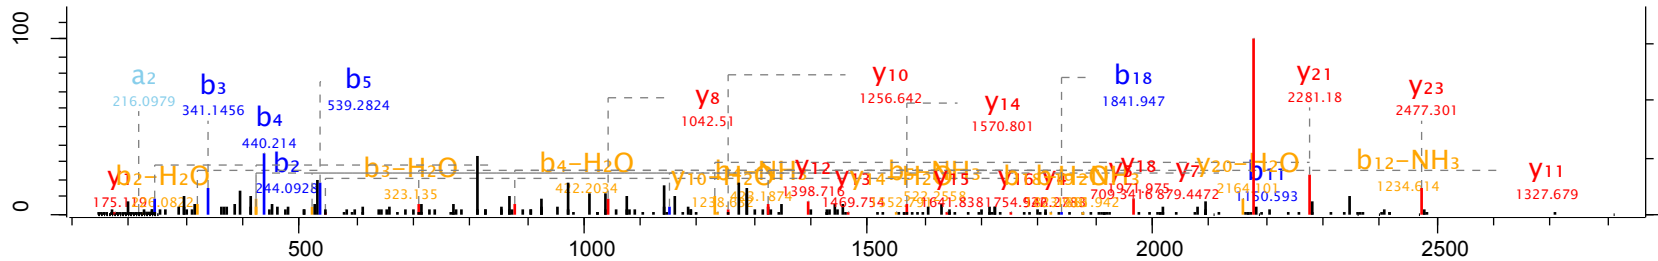

[1e4]

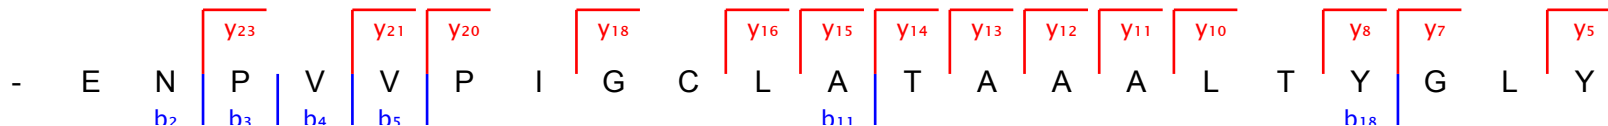

Raw file

Scan

Method

Score

m/z

Gene names

20150226\_Hela\_Top\_opt\_A3\_01\_1593

79484

TOF; CID

95.21

973.52

S100A2

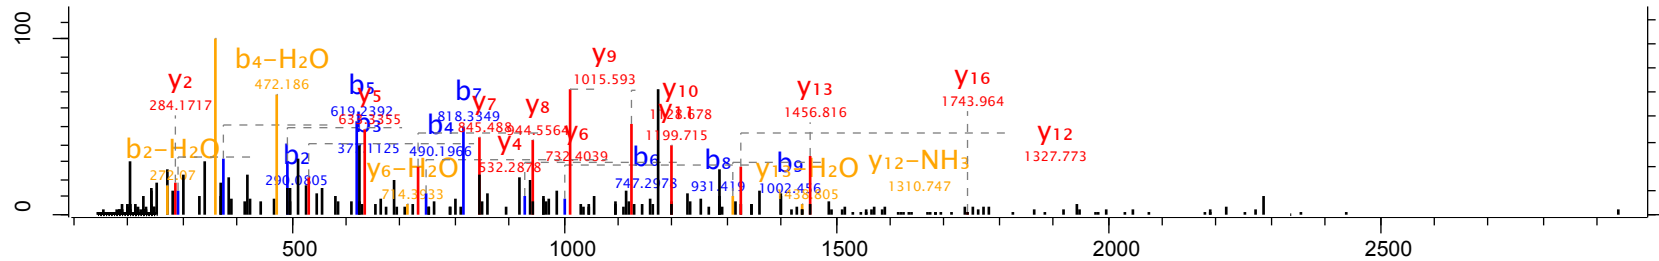

ac

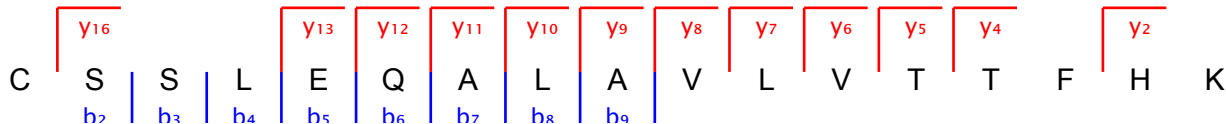

| Raw file                         | Scan  | Method   | Score | m/z    | Gene names |
|----------------------------------|-------|----------|-------|--------|------------|
| 20150226_Hela_Top_opt_A3_01_1593 | 79852 | TOF; CID | 80.63 | 801.42 | ATF6B      |

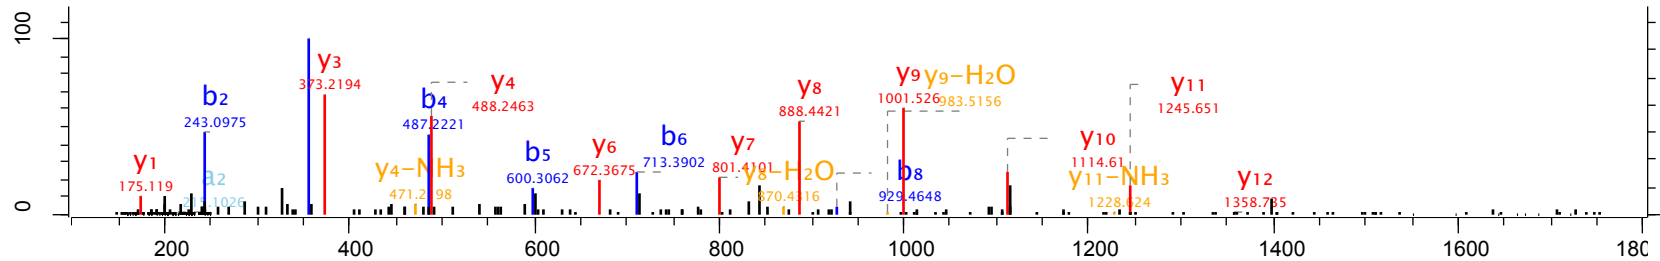

ac

- A E L M L S E I A D P T R -

h<sub>2</sub> h<sub>3</sub> h<sub>4</sub> h<sub>5</sub> h<sub>6</sub> h<sub>8</sub>

y<sub>12</sub> y<sub>11</sub> y<sub>10</sub> y<sub>9</sub> y<sub>8</sub> y<sub>7</sub> y<sub>6</sub> y<sub>4</sub> y<sub>3</sub> y<sub>1</sub>

Raw file Scan Method Score m/z Gene names  
 20150226\_Hela\_Top\_opt\_A3\_01\_1593 80882 TOF; CID 179.86 1129.57 LSM5

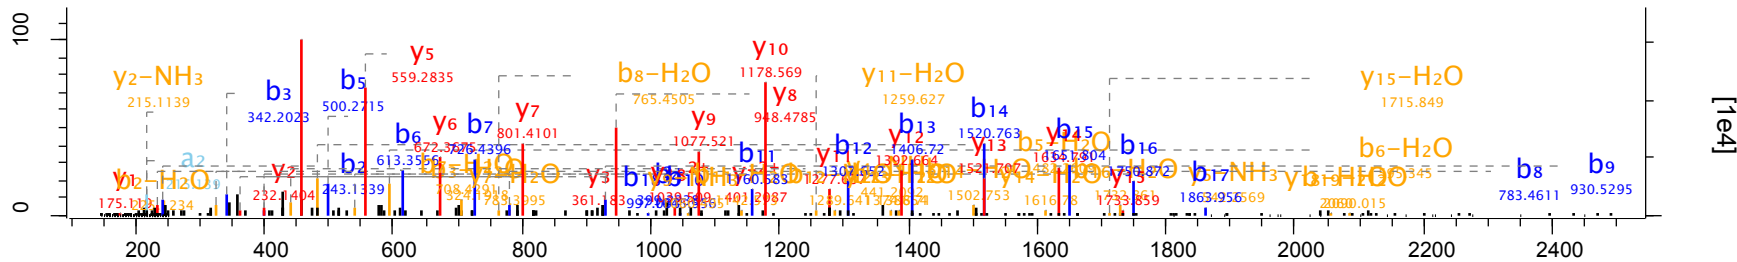

- E I V G T L L G F D D F V N M V L E D V T  
 b<sub>2</sub> b<sub>3</sub> b<sub>4</sub> b<sub>5</sub> b<sub>6</sub> b<sub>7</sub> b<sub>8</sub> b<sub>9</sub> b<sub>10</sub> b<sub>11</sub> b<sub>12</sub> b<sub>13</sub> b<sub>14</sub> b<sub>15</sub> b<sub>16</sub> b<sub>17</sub> b<sub>18</sub><sup>2+</sup>  
 y<sub>18</sub><sup>2+</sup> y<sub>15</sub> y<sub>14</sub> y<sub>13</sub> y<sub>12</sub> y<sub>11</sub> y<sub>10</sub>

| Raw file                         | Scan | Method   | Score | m/z    | Gene names |
|----------------------------------|------|----------|-------|--------|------------|
| 20150226_Hela_Top_opt_A3_01_1595 | 3116 | TOF; CID | 65.28 | 392.54 | STX17      |

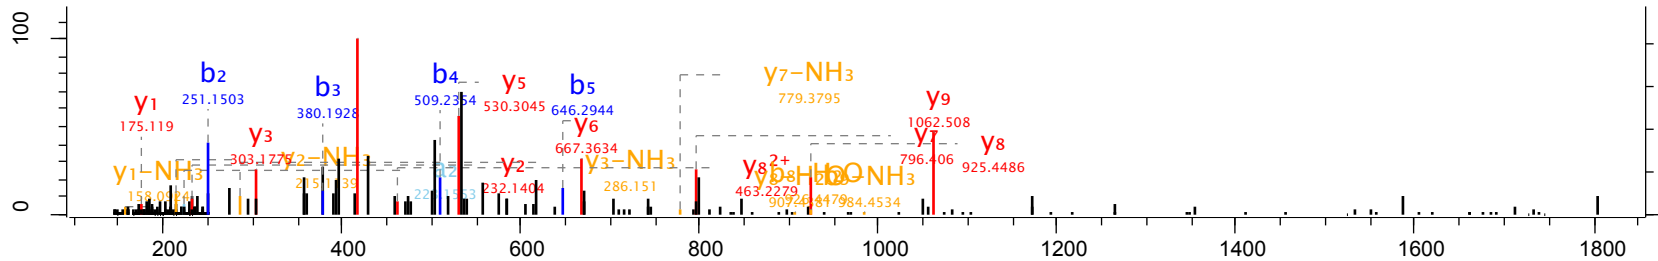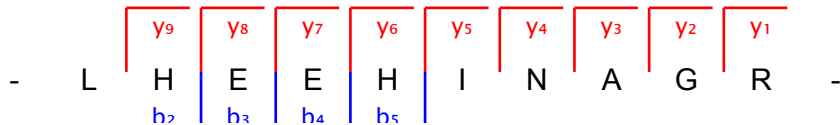

| Raw file                         | Scan | Method   | Score  | m/z    | Gene names |
|----------------------------------|------|----------|--------|--------|------------|
| 20150226_Hela_Top_opt_A3_01_1595 | 3184 | TOF; CID | 123.75 | 538.76 | TM4SF1     |

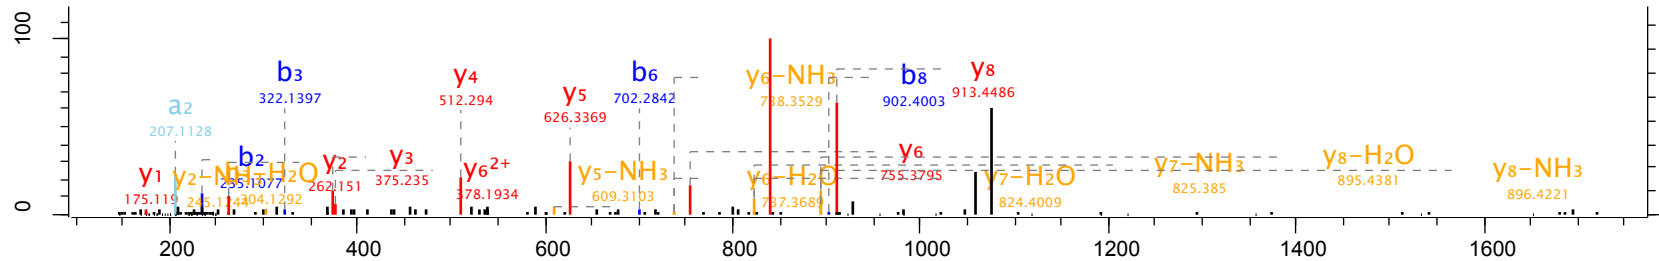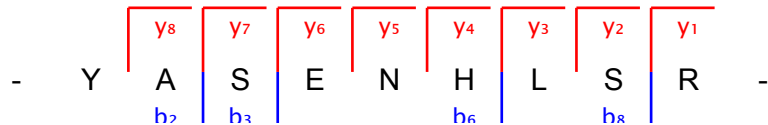

Raw file

20150226\_Hela\_Top\_opt\_A3\_01\_1595

Scan

4657

Method

TOF; CID

Score

49.48

m/z

581.29

Gene names

SCAND1

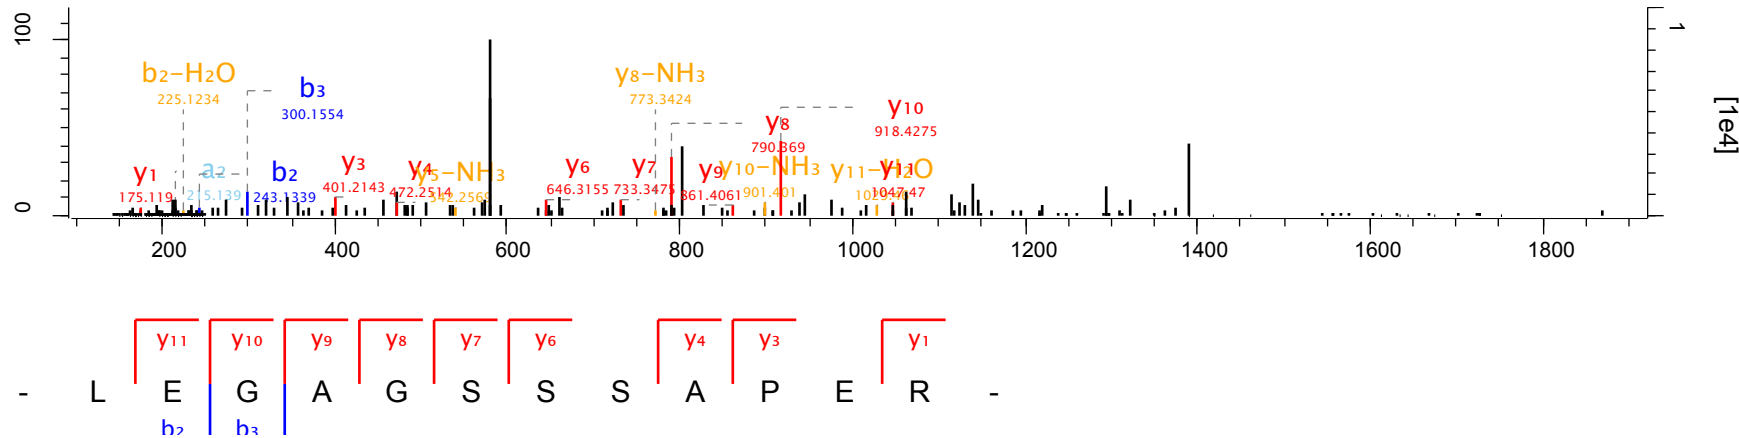

| Raw file                         | Scan | Method   | Score | m/z    | Gene names |
|----------------------------------|------|----------|-------|--------|------------|
| 20150226_Hela_Top_opt_A3_01_1595 | 4696 | TOF; CID | 66.92 | 560.27 | SFT2D2     |

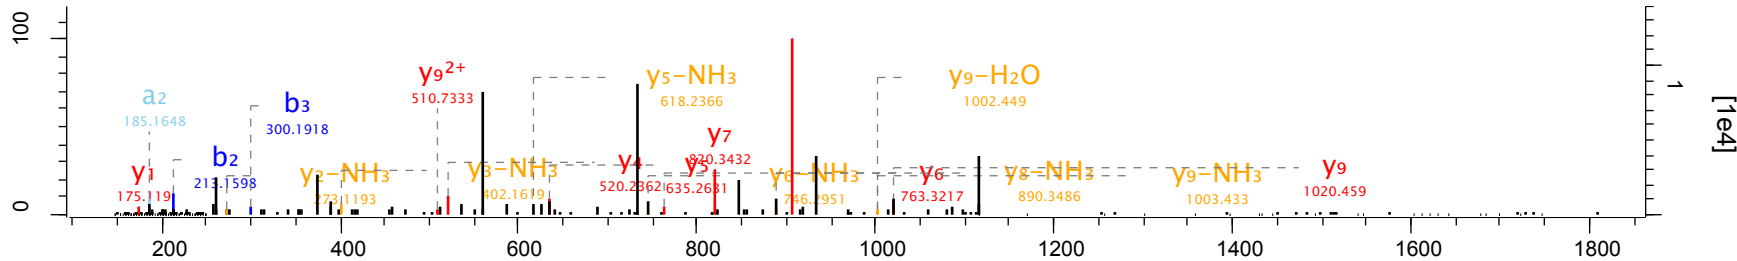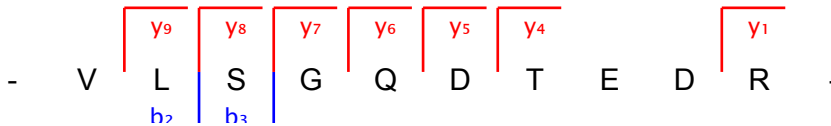





Raw file

20150226\_Hela\_Top\_opt\_A3\_01\_1595

Scan

5087

Method

TOF; CID

Score

89.27

m/z

609.33

Gene names

CDKL2

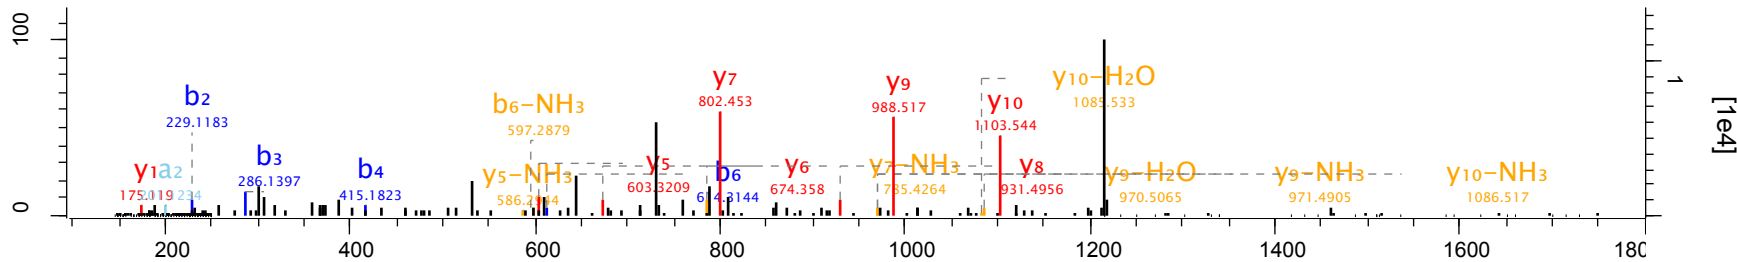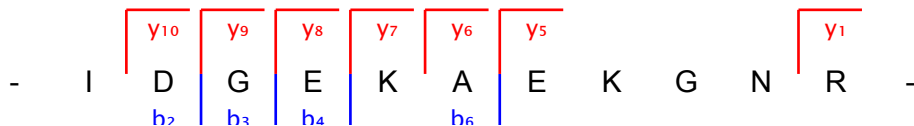

Raw file

Scan

Method

Score

m/z

Gene names

20150226\_Hela\_Top\_opt\_A3\_01\_1595

5322

TOF; CID

74.48

766.37

OFD1

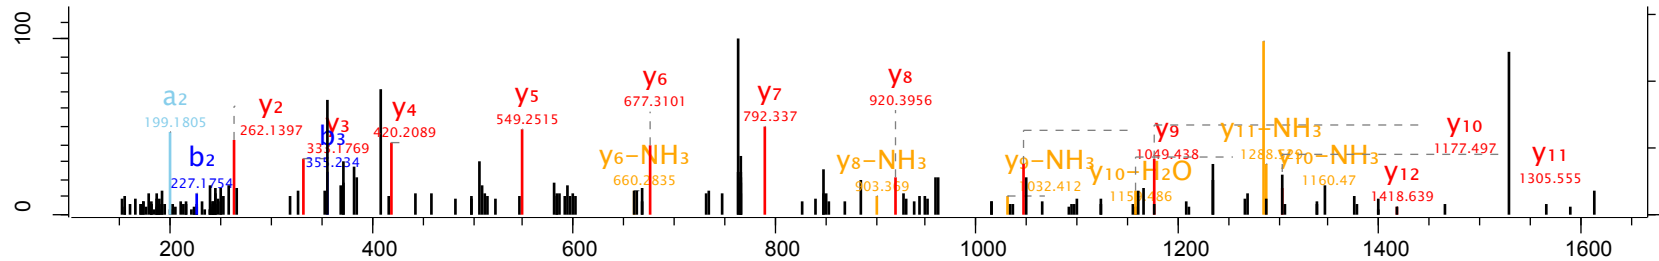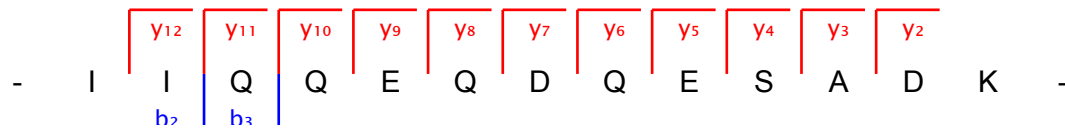

| Raw file                         | Scan | Method   | Score | m/z    | Gene names |
|----------------------------------|------|----------|-------|--------|------------|
| 20150226_Hela_Top_opt_A3_01_1595 | 6915 | TOF; CID | 84.37 | 474.74 | DPAGT1     |

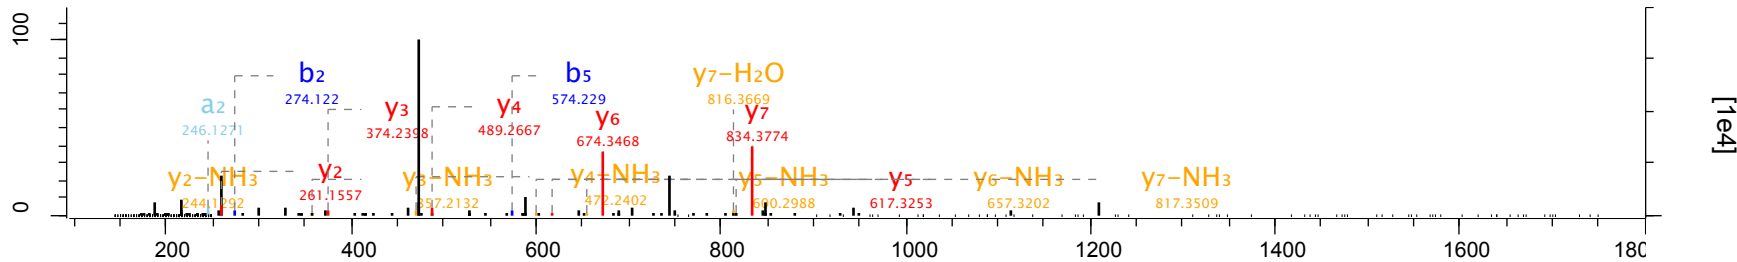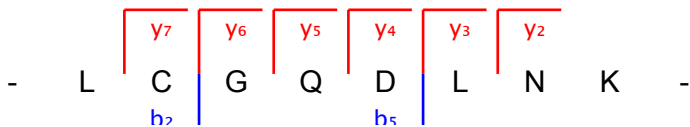

Raw file

20150226\_Hela\_Top\_opt\_A3\_01\_1595

Scan

7876

Method

TOF; CID

Score

65.22

m/z

495.23

Gene names

NKX3-2

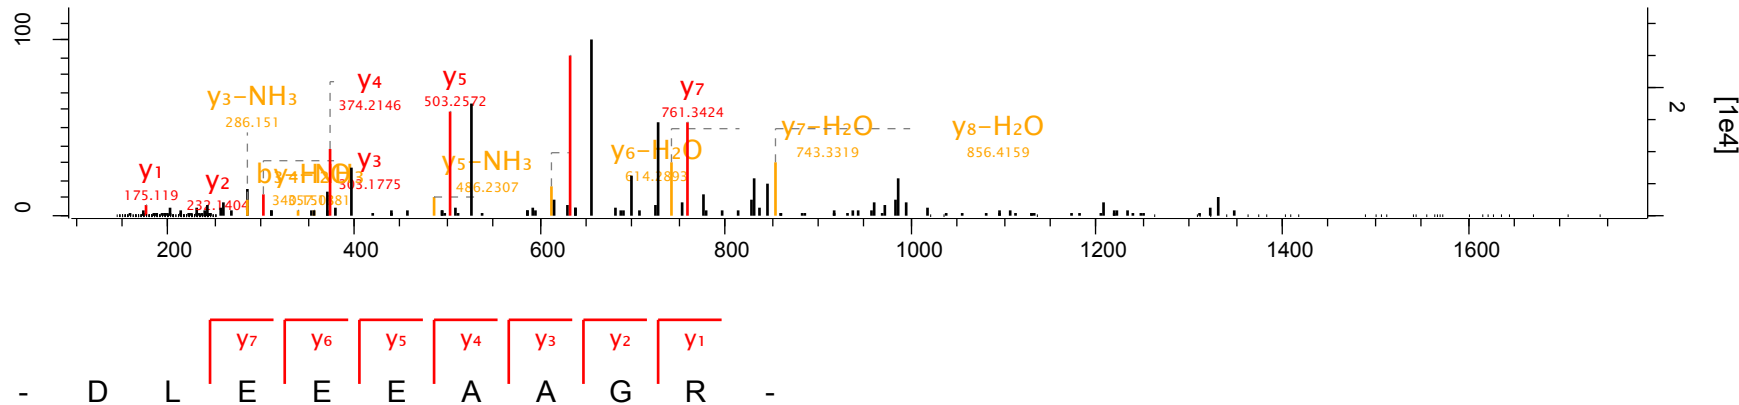

Raw file

Scan

Method

Score

m/z

Gene names

20150226\_Hela\_Top\_opt\_A3\_01\_1595

8306

TOF; CID

72.89

667.83

KIAA1467;DKFZp762C0813

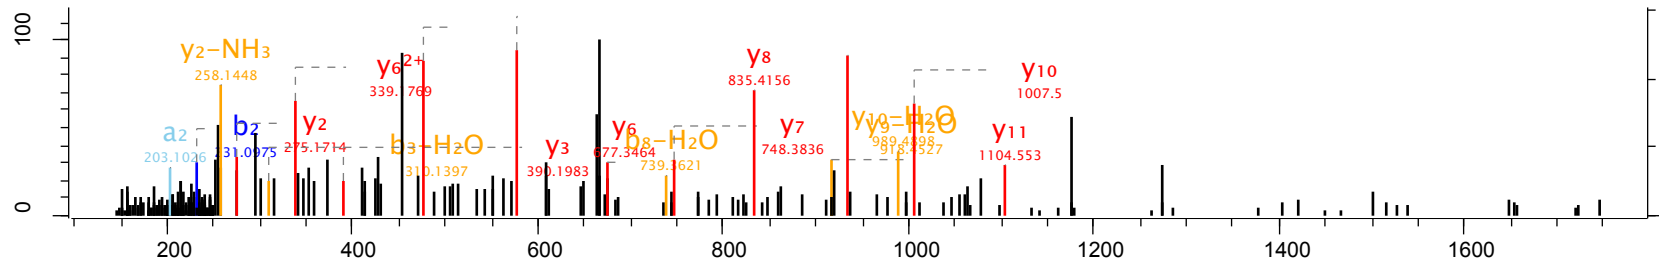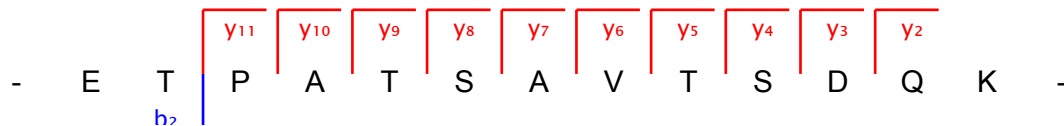

| Raw file                         | Scan | Method   | Score | m/z    | Gene names |
|----------------------------------|------|----------|-------|--------|------------|
| 20150226_Hela_Top_opt_A3_01_1595 | 8484 | TOF; CID | 64.82 | 523.29 | ORC6       |

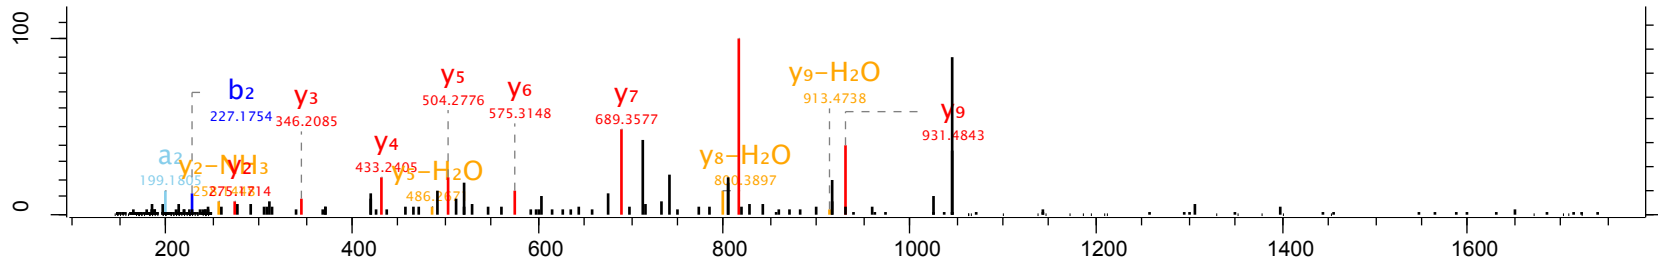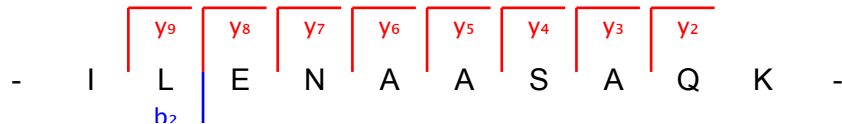

Raw file

20150226\_Hela\_Top\_opt\_A3\_01\_1595

Scan

8995

Method

TOF; CID

Score

59.2

m/z

669.8

Gene names

SPDL1

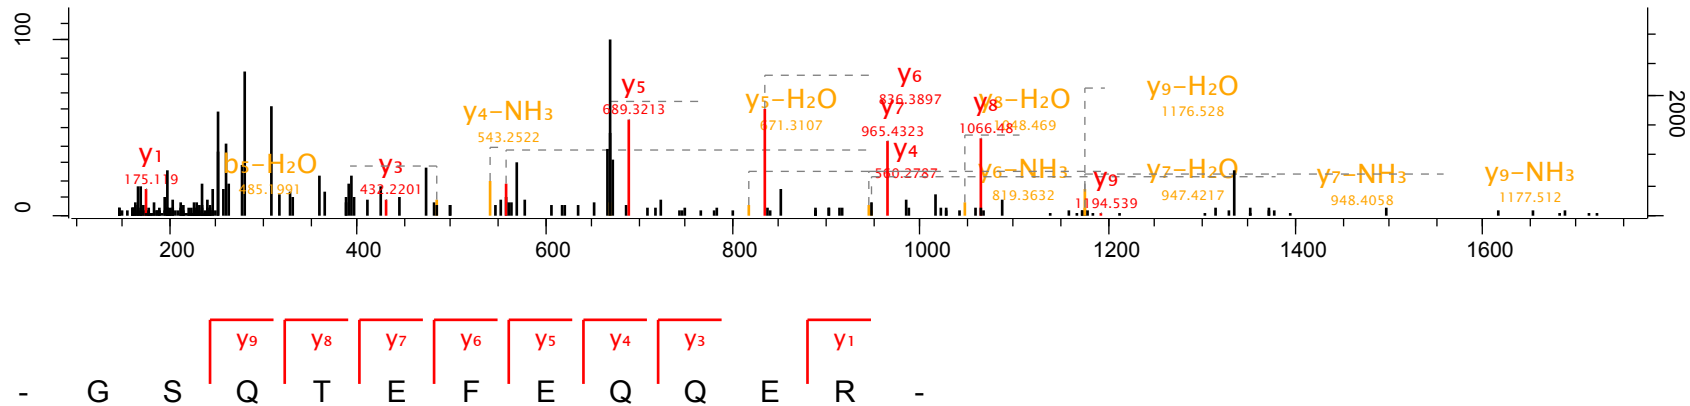



Raw file

20150226\_Hela\_Top\_opt\_A3\_01\_1595

Scan

9965

Method

TOF; CID

Score

117.18

m/z

725.35

Gene names

RFWD2

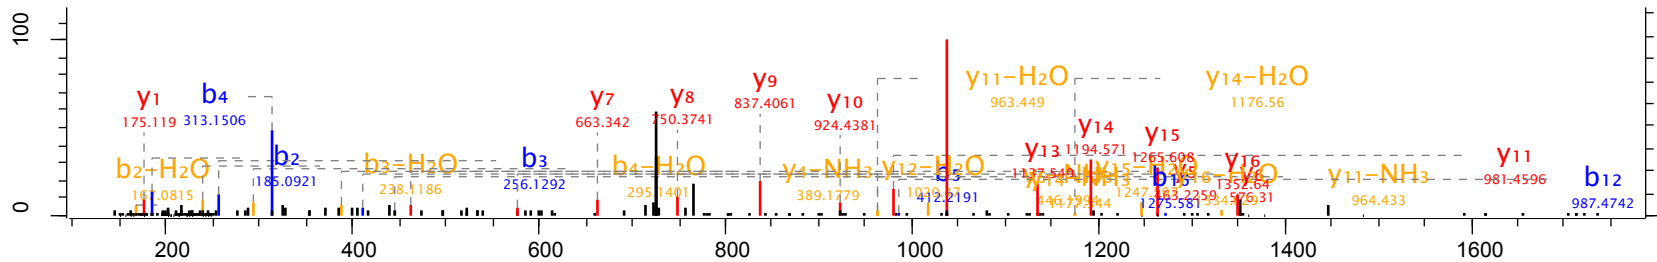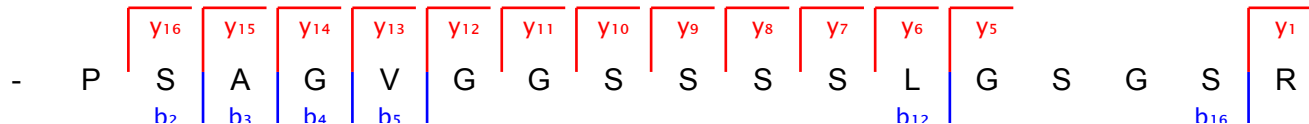

Raw file

20150226\_Hela\_Top\_opt\_A3\_01\_1595

Scan

10034

Method

TOF; CID

Score

69.29

m/z

850.4

Gene names

BRI3BP

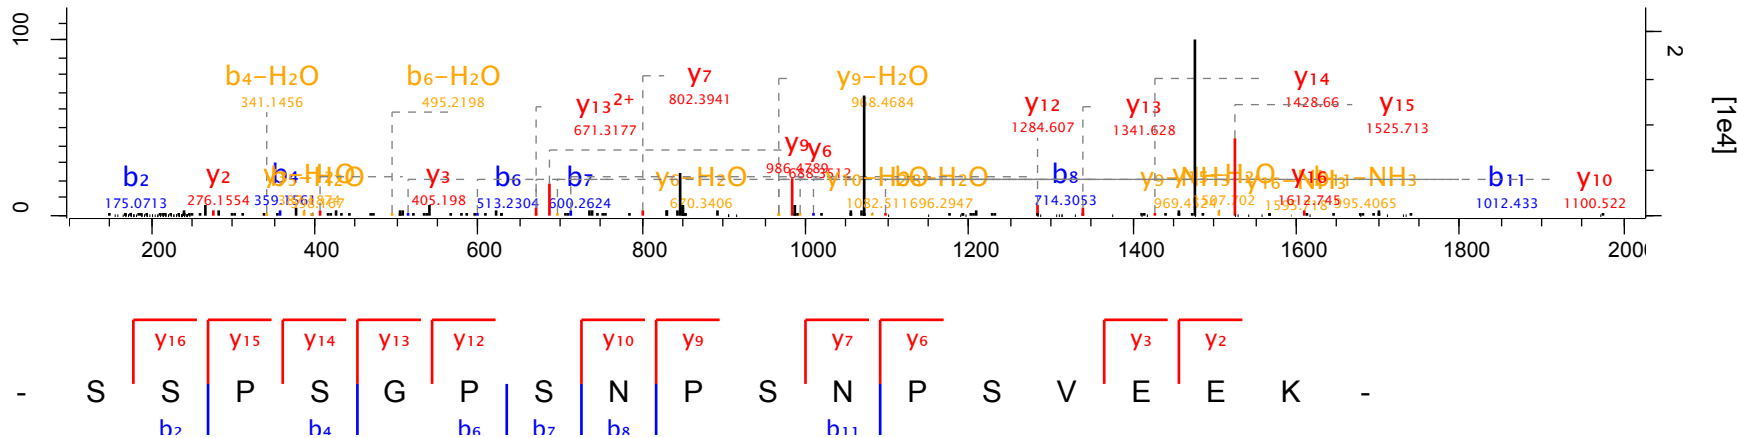

| Raw file                         | Scan  | Method   | Score | m/z    | Gene names |
|----------------------------------|-------|----------|-------|--------|------------|
| 20150226_Hela_Top_opt_A3_01_1595 | 11619 | TOF; CID | 85.94 | 868.89 | HOKK1      |

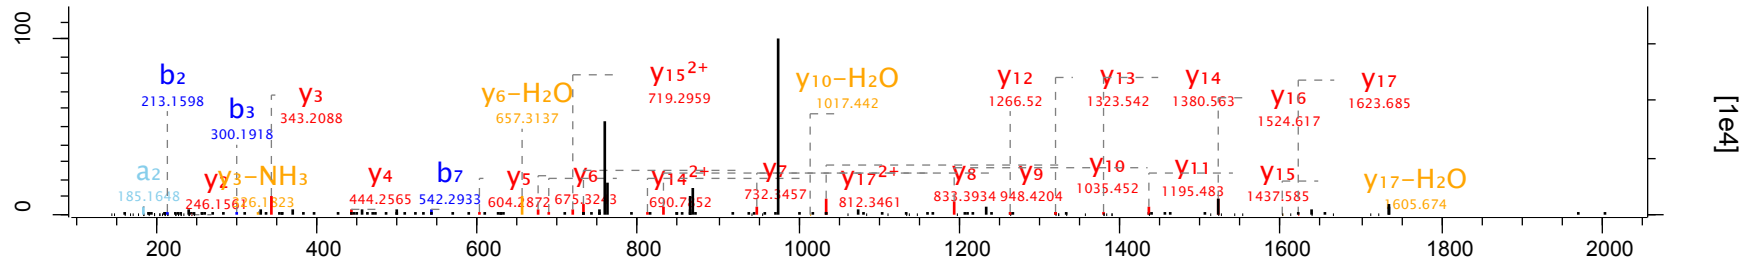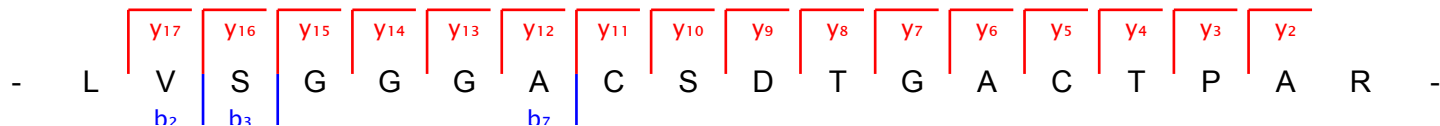

Raw file

20150226\_Hela\_Top\_opt\_A3\_01\_1595

Scan

12049

Method

TOF; CID

Score

105.03

m/z

767.36

Gene names

WDTC1

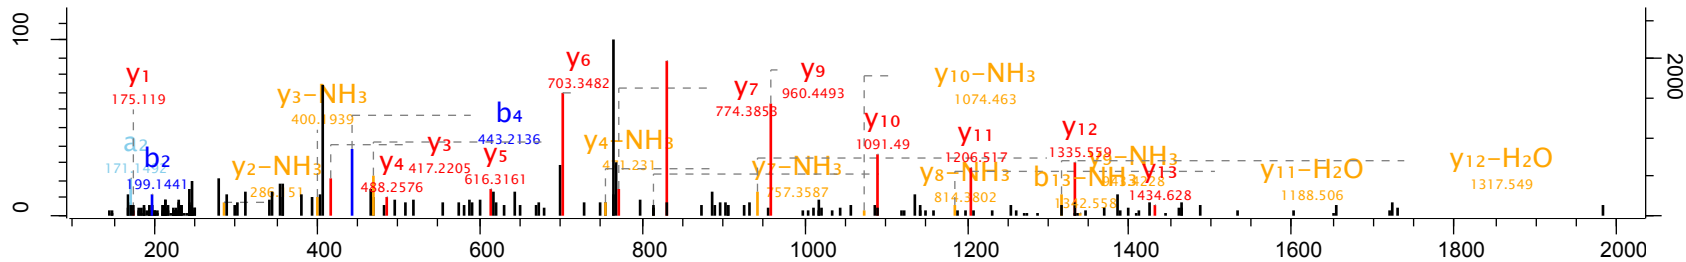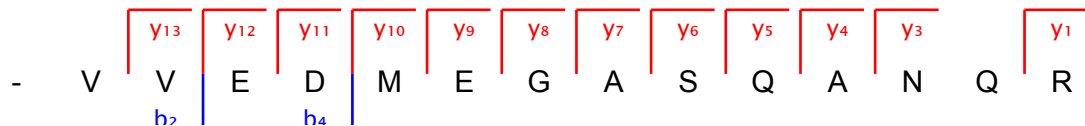

| Raw file                         | Scan  | Method   | Score | m/z    | Gene names |
|----------------------------------|-------|----------|-------|--------|------------|
| 20150226_Hela_Top_opt_A3_01_1595 | 12397 | TOF; CID | 76.34 | 911.89 | RFXAP      |

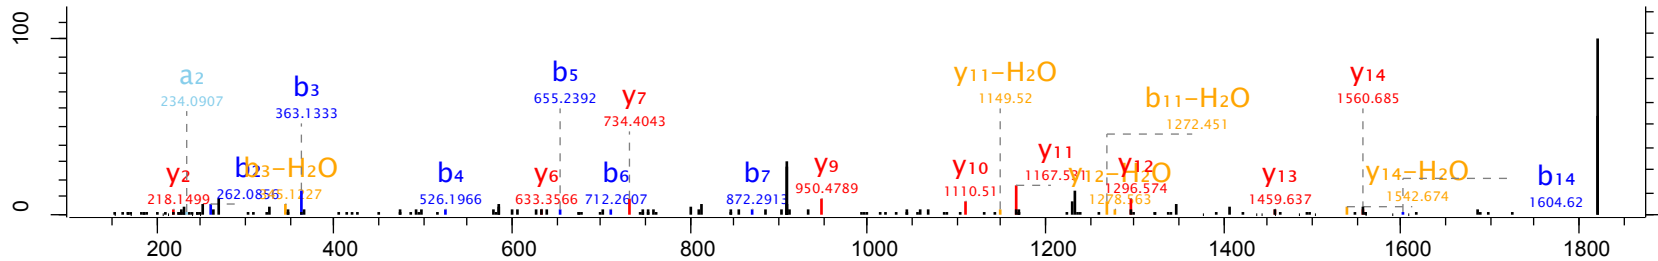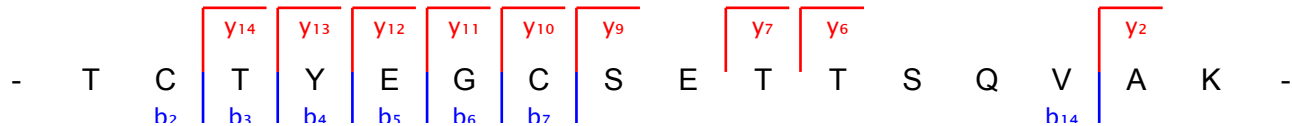

Raw file

20150226\_Hela\_Top\_opt\_A3\_01\_1595

Scan

12421

Method

TOF; CID

Score

114.97

m/z

550.79

Gene names

FLVCR1

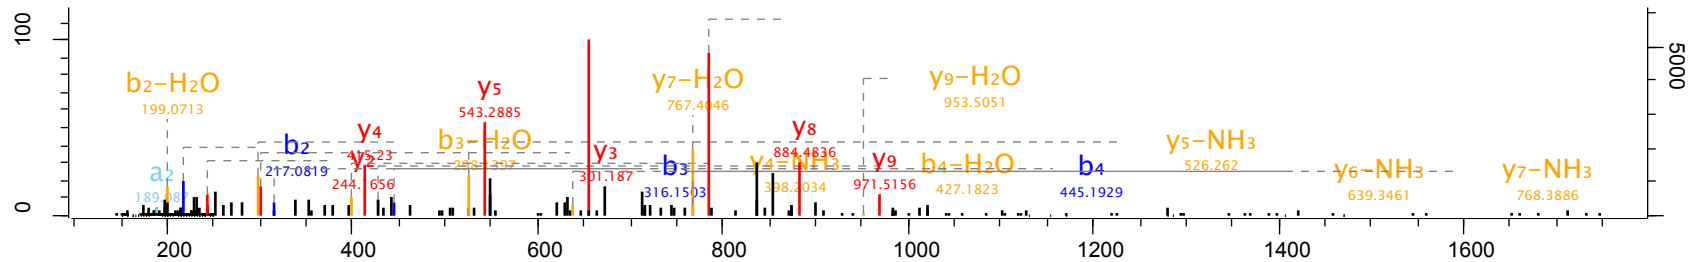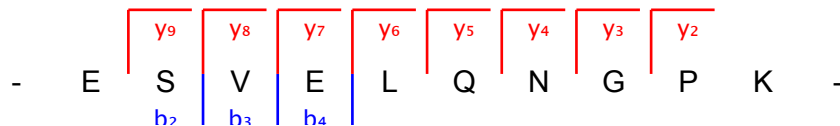

Raw file

20150226\_Hela\_Top\_opt\_A3\_01\_1595

Scan

12607

Method

TOF; CID

Score

141.13

m/z

959.41

Gene names

UNC93B1

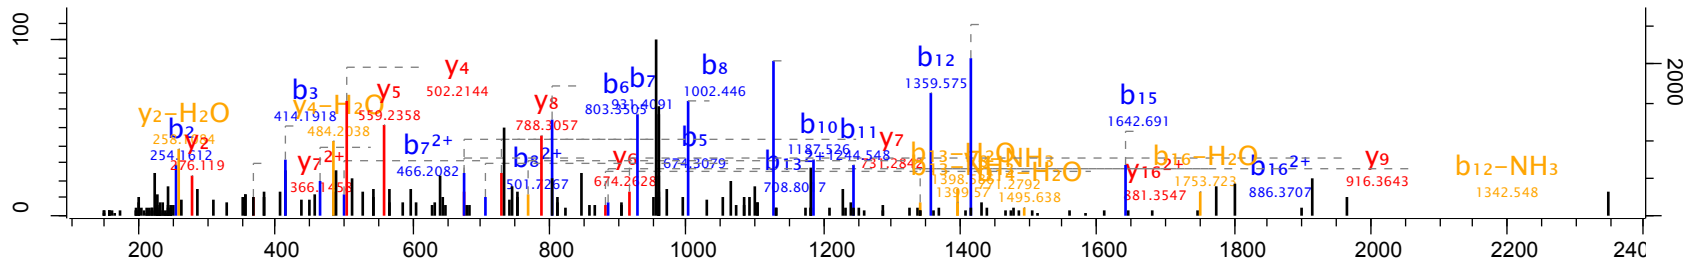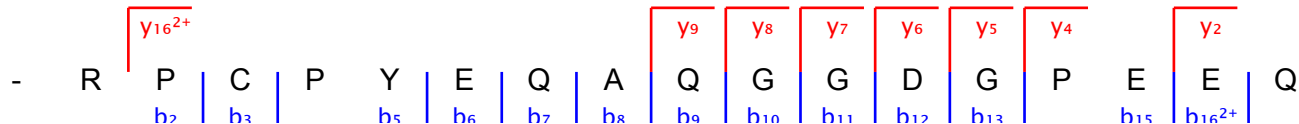

| Raw file                         | Scan  | Method   | Score | m/z   | Gene names |
|----------------------------------|-------|----------|-------|-------|------------|
| 20150226_Hela_Top_opt_A3_01_1595 | 12757 | TOF; CID | 83.51 | 639.3 | TAF8       |

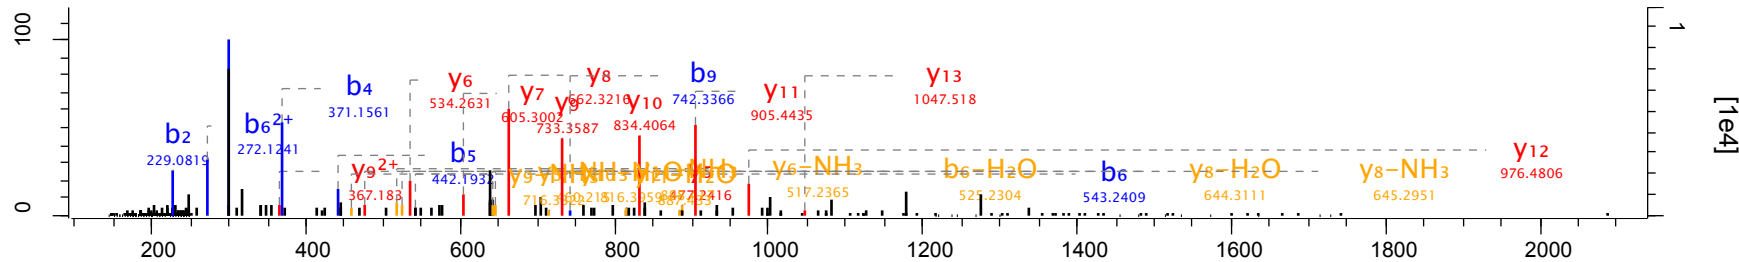

ac

- A D A A A T A G A G S G T R -

b<sub>2</sub>
y<sub>13</sub>
y<sub>12</sub>
y<sub>11</sub>
y<sub>10</sub>
y<sub>9</sub>
y<sub>8</sub>
y<sub>7</sub>
y<sub>6</sub>
y<sub>5</sub>
b<sub>3</sub>
b<sub>4</sub>
b<sub>5</sub>
b<sub>6</sub>
b<sub>9</sub>



Raw file

20150226\_Hela\_Top\_opt\_A3\_01\_1595

Scan

13187

Method

TOF; CID

Score

65.84

m/z

630.32

Gene names

TIPIN

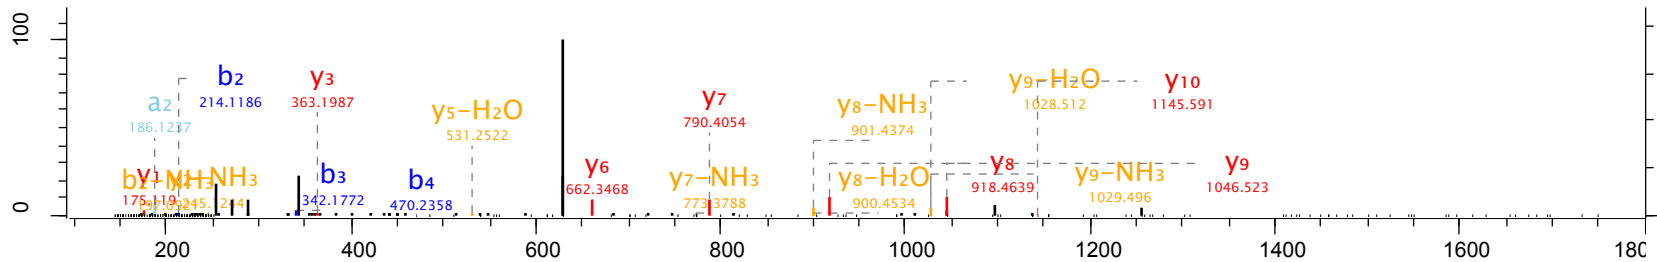

[1e4]

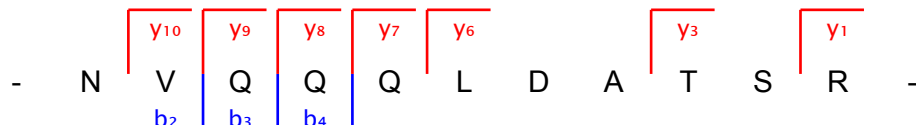

Raw file

20150226\_Hela\_Top\_opt\_A3\_01\_1595

Scan

13544

Method

TOF; CID

Score

96.82

m/z

711.29

Gene names

MRPS33

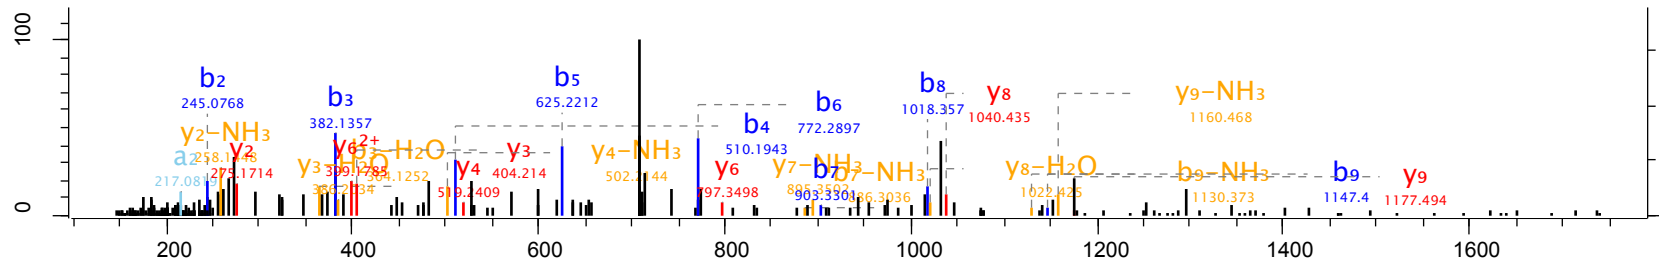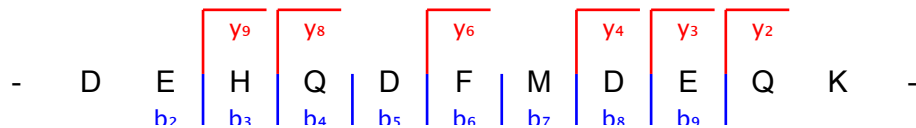

| Raw file                         | Scan  | Method   | Score | m/z    | Gene names |
|----------------------------------|-------|----------|-------|--------|------------|
| 20150226_Hela_Top_opt_A3_01_1595 | 15336 | TOF; CID | 72.2  | 522.28 | FUNDC2     |

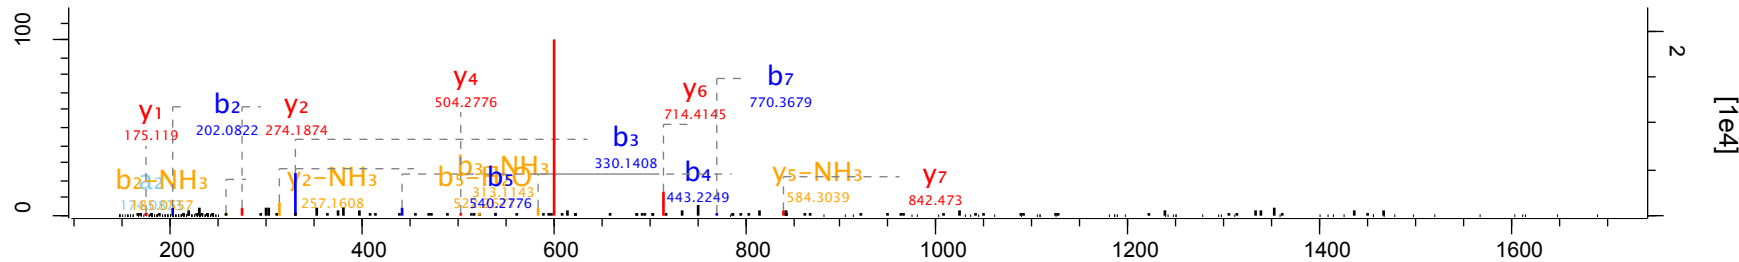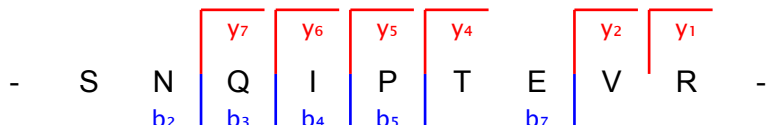

| Raw file                         | Scan  | Method   | Score | m/z    | Gene names |
|----------------------------------|-------|----------|-------|--------|------------|
| 20150226_Hela_Top_opt_A3_01_1595 | 17145 | TOF; CID | 51.5  | 592.67 | C20orf24   |

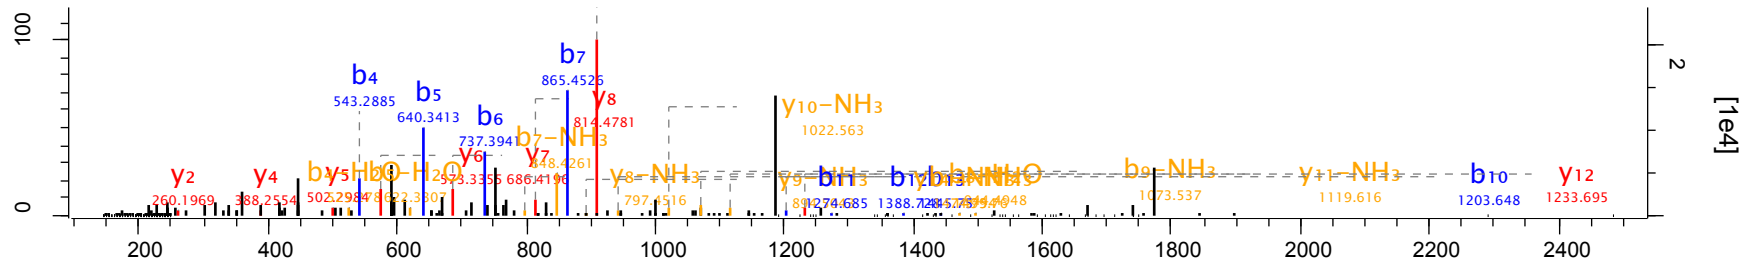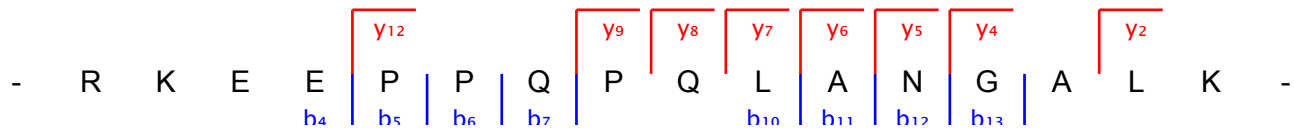

| Raw file                         | Scan  | Method   | Score | m/z    | Gene names |
|----------------------------------|-------|----------|-------|--------|------------|
| 20150226_Hela_Top_opt_A3_01_1595 | 17253 | TOF; CID | 65.04 | 641.35 | KLHDC4     |

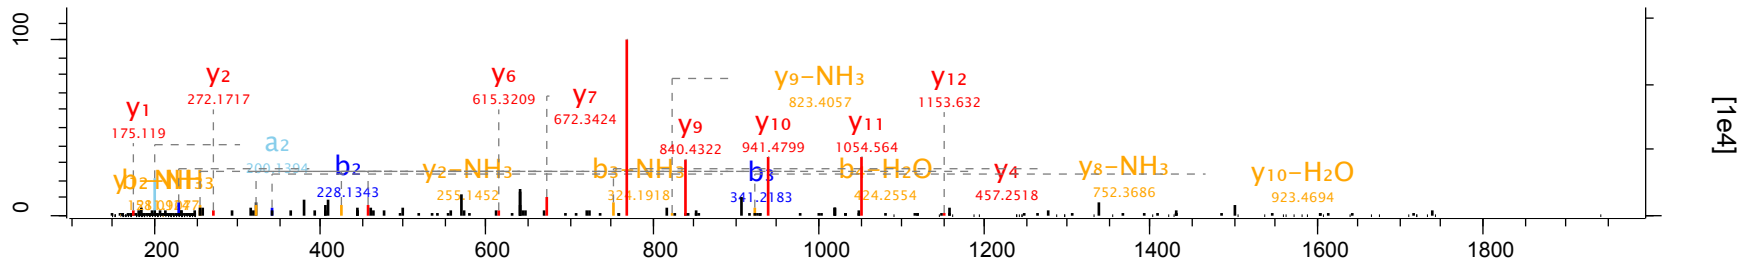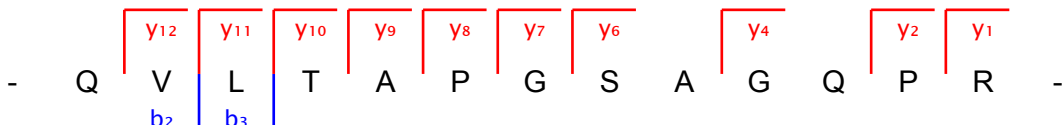

Raw file

Scan

Method

Score

m/z

Gene names

20150226\_Hela\_Top\_opt\_A3\_01\_1595

17939

TOF; CID

96.21

676.31

IFIT1

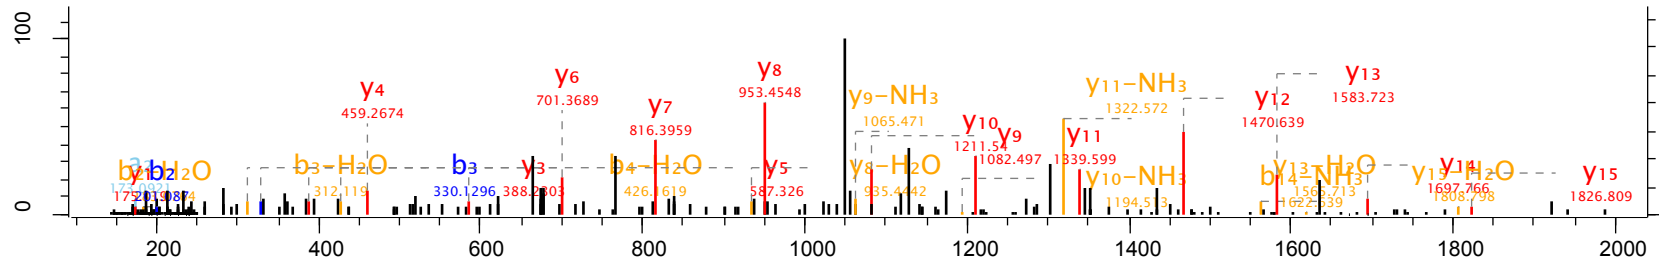

- E A E N L M Q E E H D N Q A N V R -

b<sub>2</sub> b<sub>3</sub> y<sub>15</sub> y<sub>14</sub> y<sub>13</sub> y<sub>12</sub> y<sub>11</sub> y<sub>10</sub> y<sub>9</sub> y<sub>8</sub> y<sub>7</sub> y<sub>6</sub> y<sub>5</sub> y<sub>4</sub> y<sub>3</sub> y<sub>1</sub>

Raw file

20150226\_Hela\_Top\_opt\_A3\_01\_1595

Scan

18154

Method

TOF; CID

Score

152.88

m/z

886.09

Gene names

MPLKIP

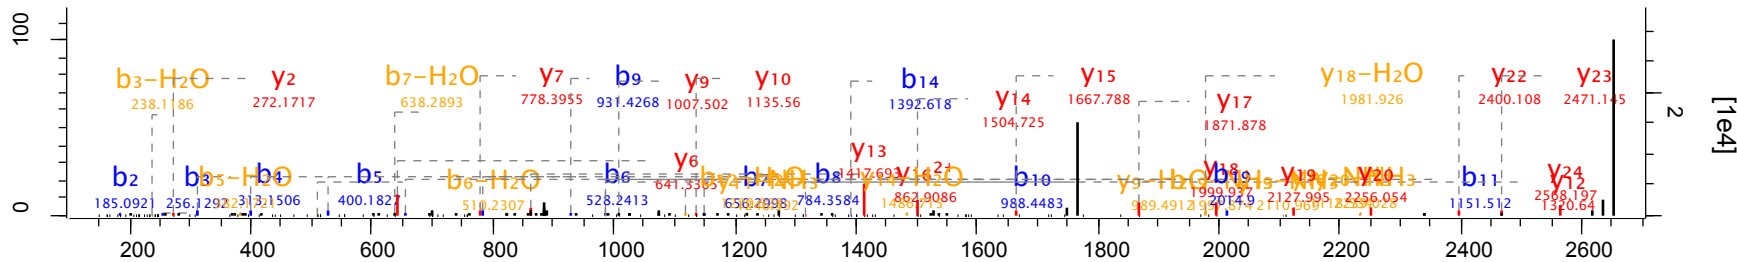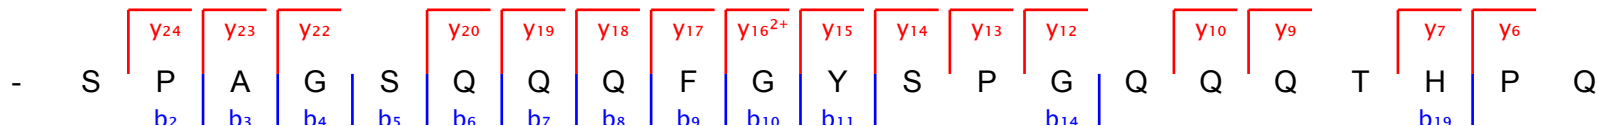

| Raw file                         | Scan  | Method   | Score | m/z    | Gene names |
|----------------------------------|-------|----------|-------|--------|------------|
| 20150226_Hela_Top_opt_A3_01_1595 | 18347 | TOF; CID | 52.25 | 602.81 | PBXIP1     |

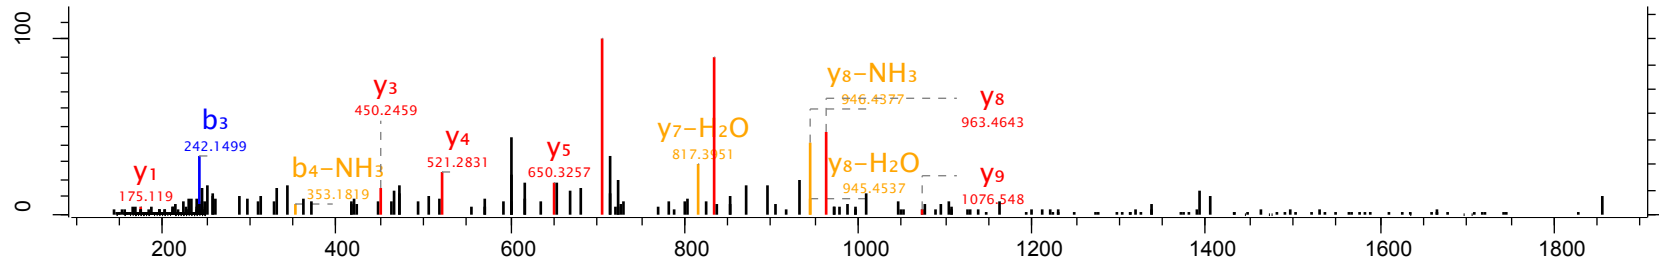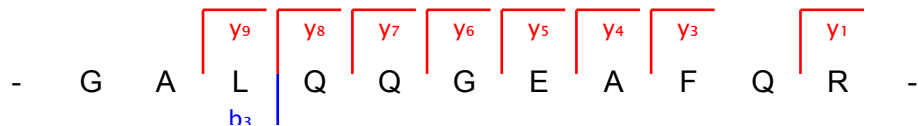



Raw file

20150226\_Hela\_Top\_opt\_A3\_01\_1595

Scan

18674

Method

TOF; CID

Score

115.1

m/z

786.42

Gene names

CACTIN

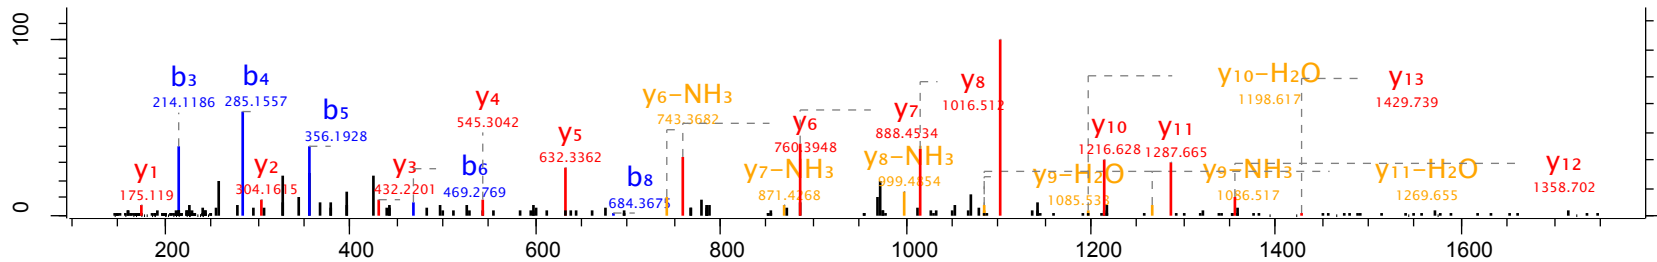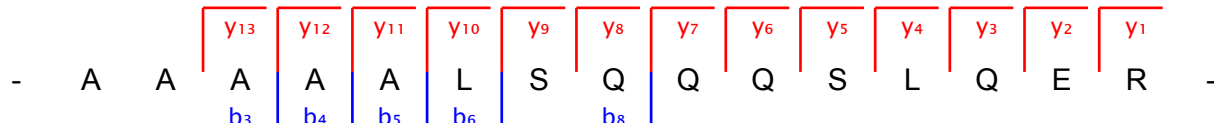

Raw file

20150226\_Hela\_Top\_opt\_A3\_01\_1595

Scan

18796

Method

TOF; CID

Score

111.78

m/z

800.39

Gene names

ENTHD2

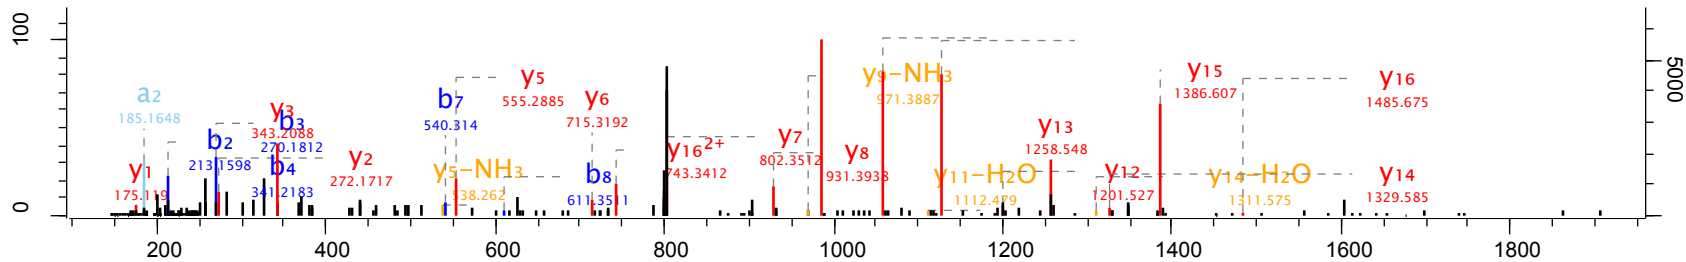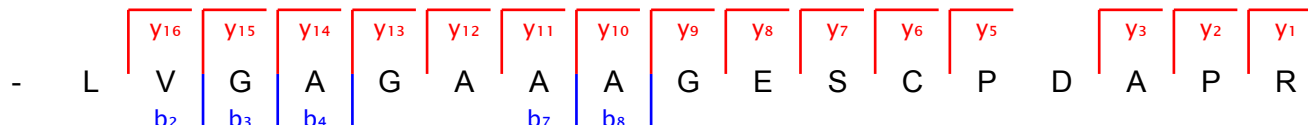

| Raw file                         | Scan  | Method   | Score | m/z    | Gene names |
|----------------------------------|-------|----------|-------|--------|------------|
| 20150226_Hela_Top_opt_A3_01_1595 | 19289 | TOF; CID | 47.99 | 471.28 | ZC3H13     |

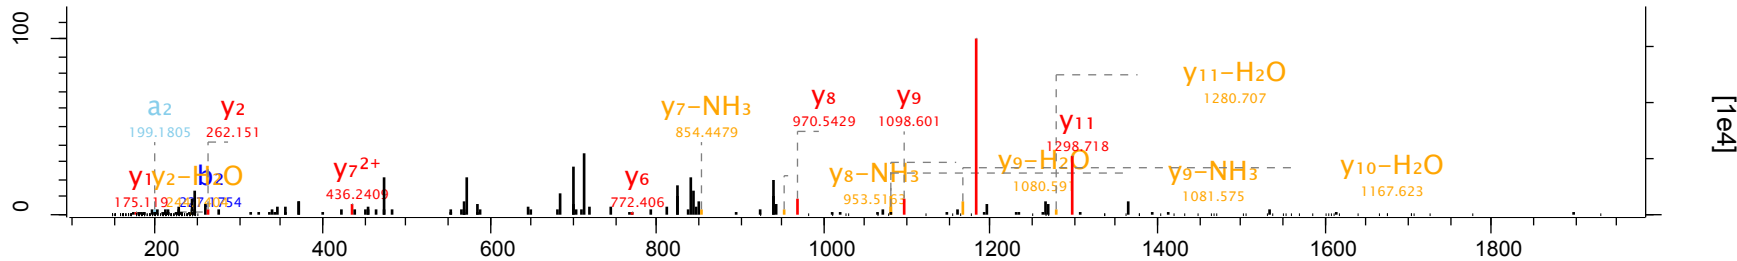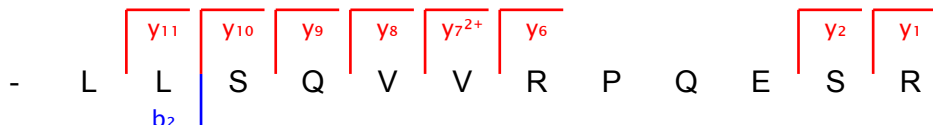

| Raw file                         | Scan  | Method   | Score | m/z    | Gene names |
|----------------------------------|-------|----------|-------|--------|------------|
| 20150226_Hela_Top_opt_A3_01_1595 | 19795 | TOF; CID | 59.23 | 499.28 | ZNF24      |

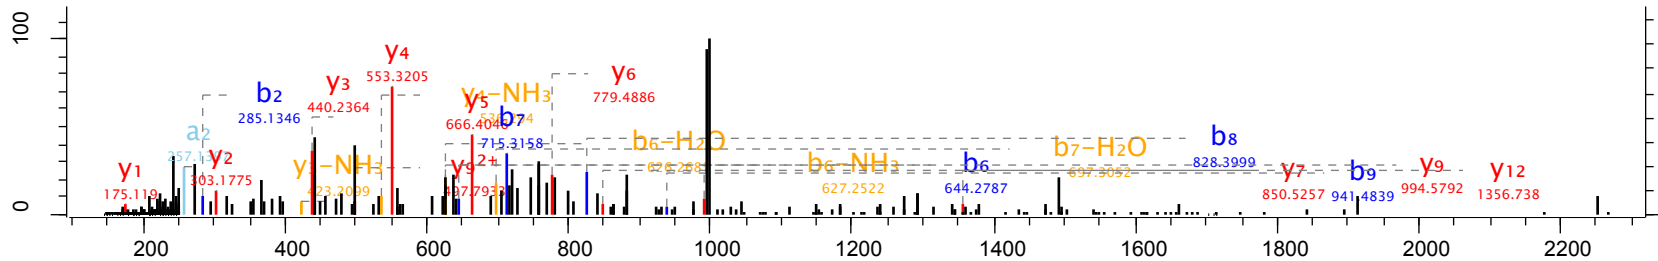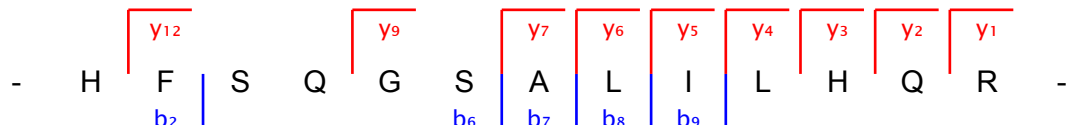

Raw file

20150226\_Hela\_Top\_opt\_A3\_01\_1595

Scan

19970

Method

TOF; CID

Score

115.88

m/z

939.47

Gene names

EYA3

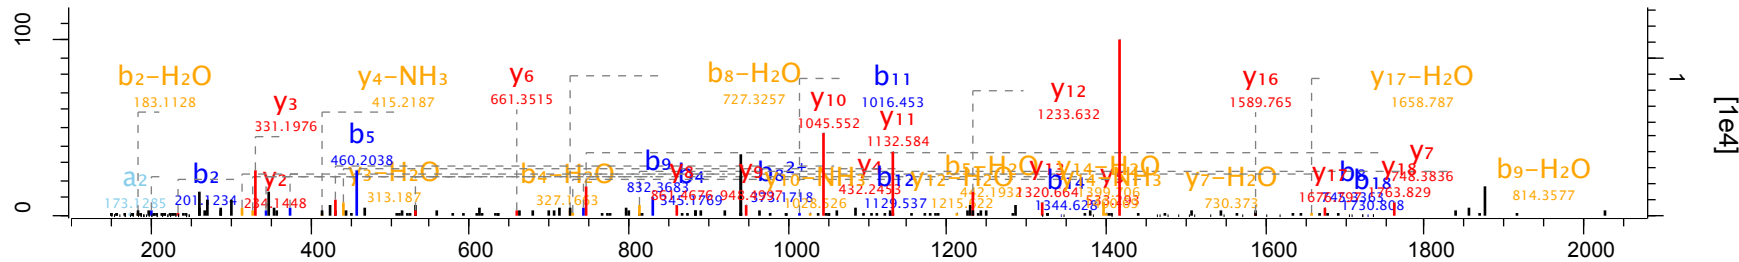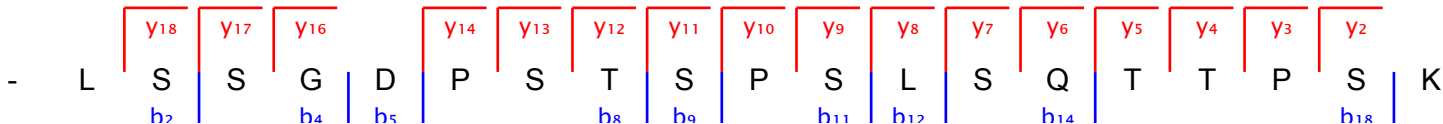

| Raw file                         | Scan  | Method   | Score | m/z   | Gene names |
|----------------------------------|-------|----------|-------|-------|------------|
| 20150226_Hela_Top_opt_A3_01_1595 | 21455 | TOF; CID | 61.68 | 554.3 | DNAH7      |

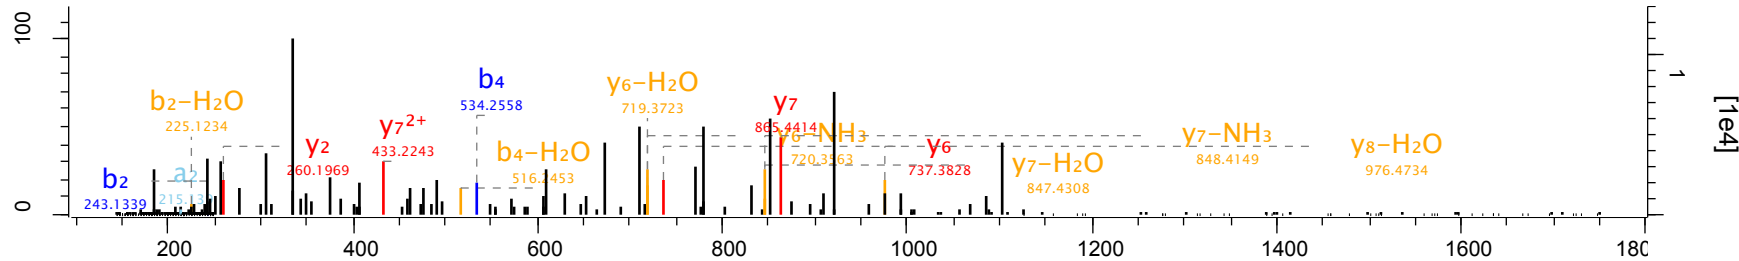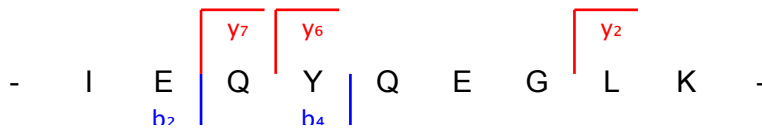

| Raw file                         | Scan  | Method   | Score | m/z   | Gene names |
|----------------------------------|-------|----------|-------|-------|------------|
| 20150226_Hela_Top_opt_A3_01_1595 | 22112 | TOF; CID | 48.95 | 318.2 | ZCCHC10    |

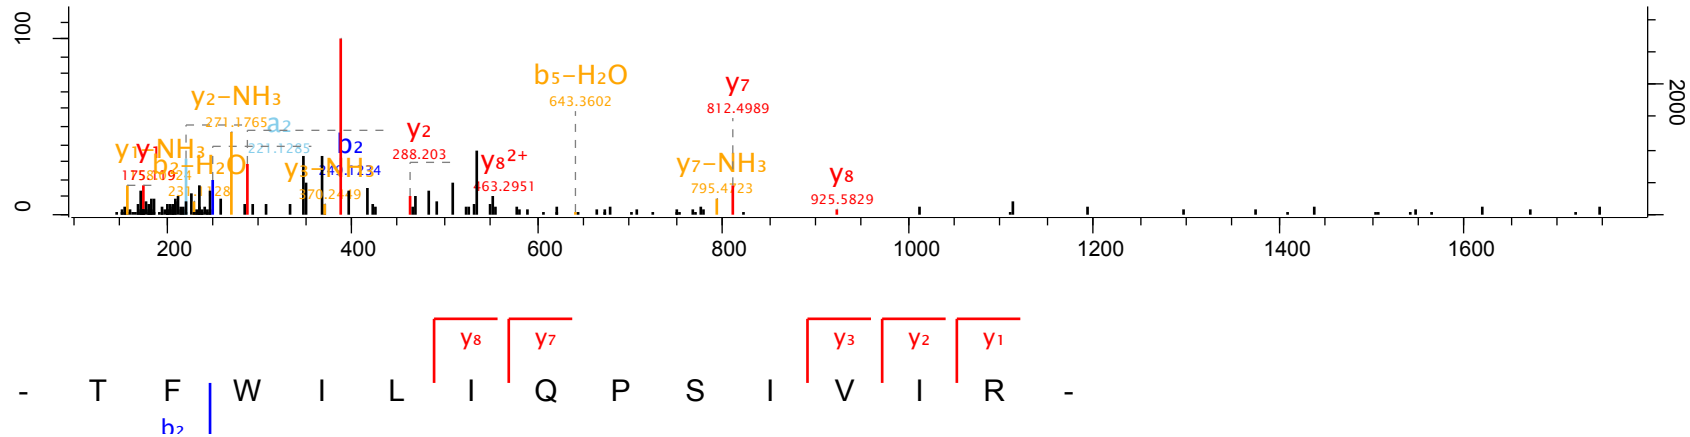

| Raw file                         | Scan  | Method   | Score | m/z   | Gene names |
|----------------------------------|-------|----------|-------|-------|------------|
| 20150226_Hela_Top_opt_A3_01_1595 | 22155 | TOF; CID | 76.36 | 617.3 | MYL3;MYL1  |

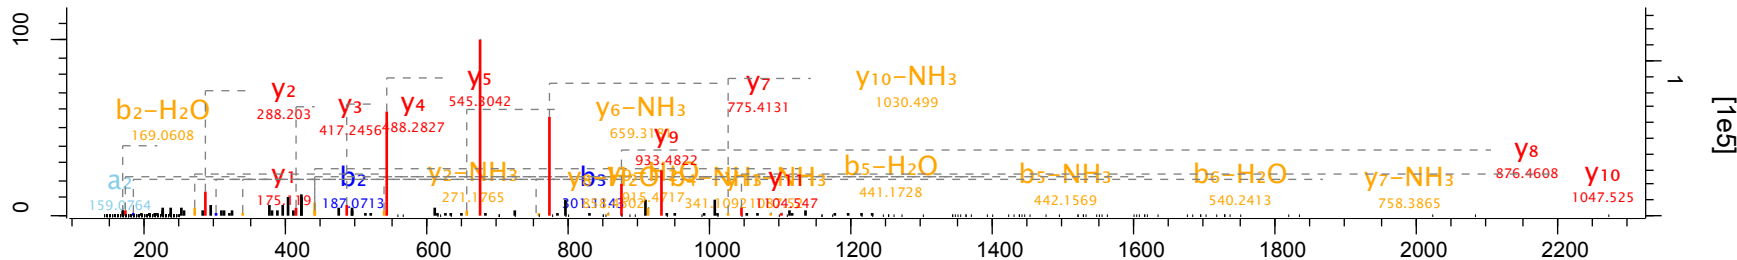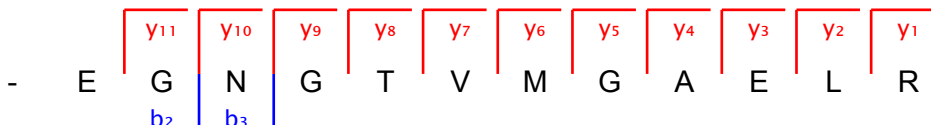



Raw file

20150226\_Hela\_Top\_opt\_A3\_01\_1595

Scan

25570

Method

TOF; CID

Score

84.69

m/z

624.86

Gene names

THG1L

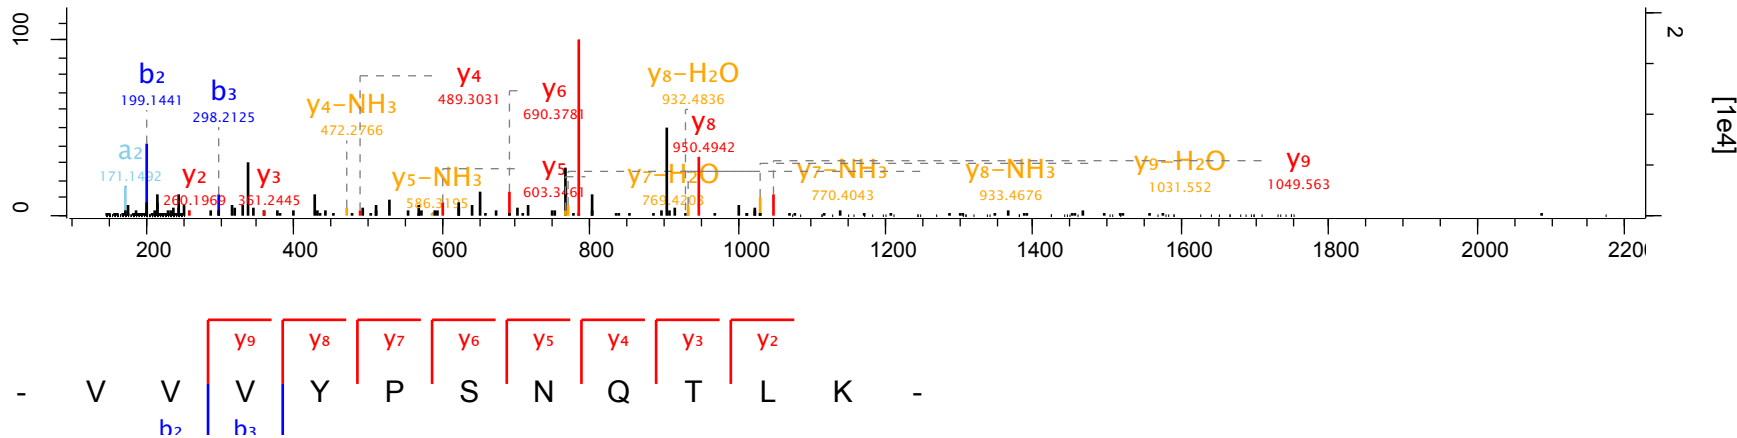

| Raw file                         | Scan  | Method   | Score | m/z   | Gene names |
|----------------------------------|-------|----------|-------|-------|------------|
| 20150226_Hela_Top_opt_A3_01_1595 | 25688 | TOF; CID | 91.64 | 539.8 | ITM2B      |

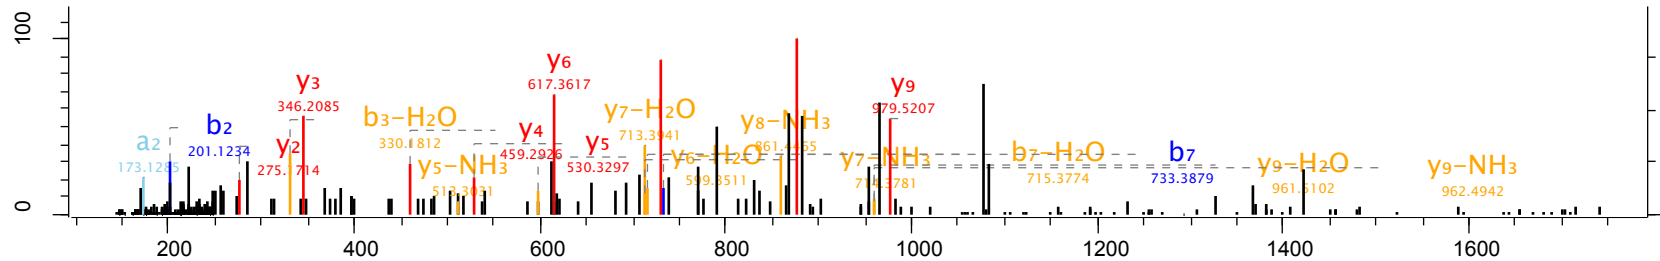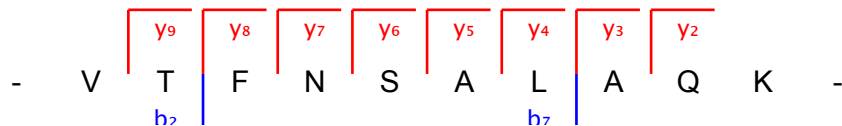

| Raw file                         | Scan  | Method   | Score | m/z    | Gene names |
|----------------------------------|-------|----------|-------|--------|------------|
| 20150226_Hela_Top_opt_A3_01_1595 | 27112 | TOF; CID | 73.66 | 495.24 | VLDLR      |

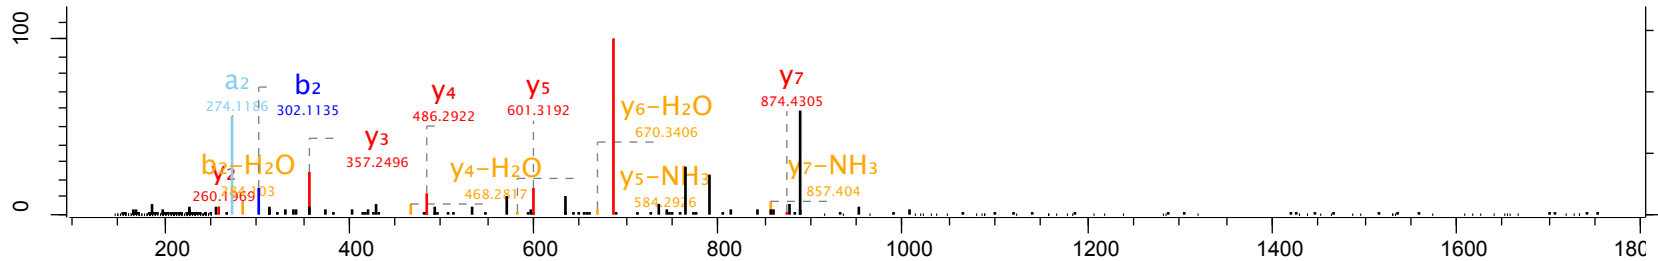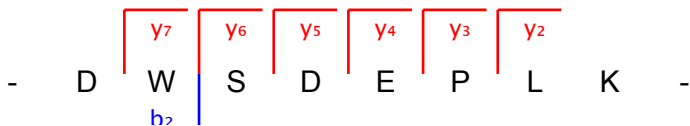

[1e4]

| Raw file                         | Scan  | Method   | Score | m/z    | Gene names |
|----------------------------------|-------|----------|-------|--------|------------|
| 20150226_Hela_Top_opt_A3_01_1595 | 27782 | TOF; CID | 76.12 | 682.66 | CHCHD7     |

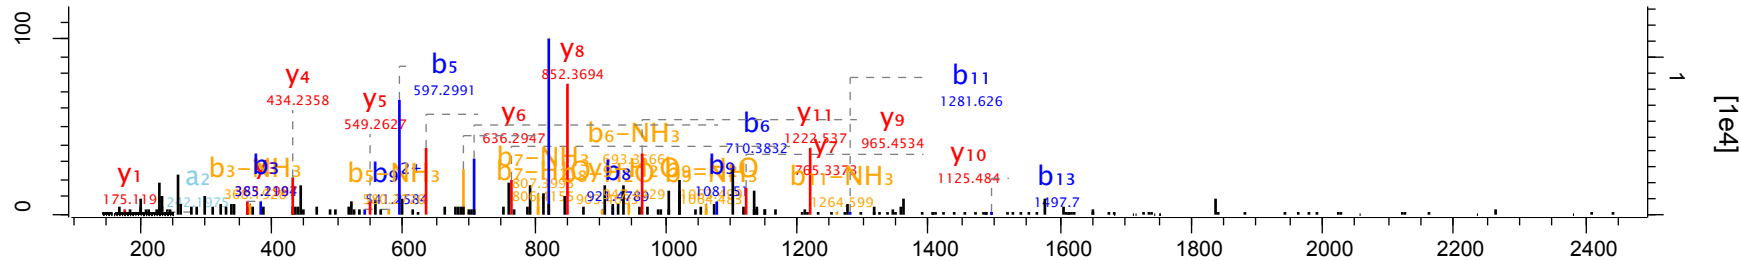

- L R | D | P D | I | N P C L S E S D A S T R -  
 a2 | b3 | b5 | b6 | b7 | b8 | b9 | b11 | b13

| Raw file                         | Scan  | Method   | Score | m/z    | Gene names   |
|----------------------------------|-------|----------|-------|--------|--------------|
| 20150226_Hela_Top_opt_A3_01_1595 | 28219 | TOF; CID | 60.4  | 537.81 | ATP5SL;DDHD2 |

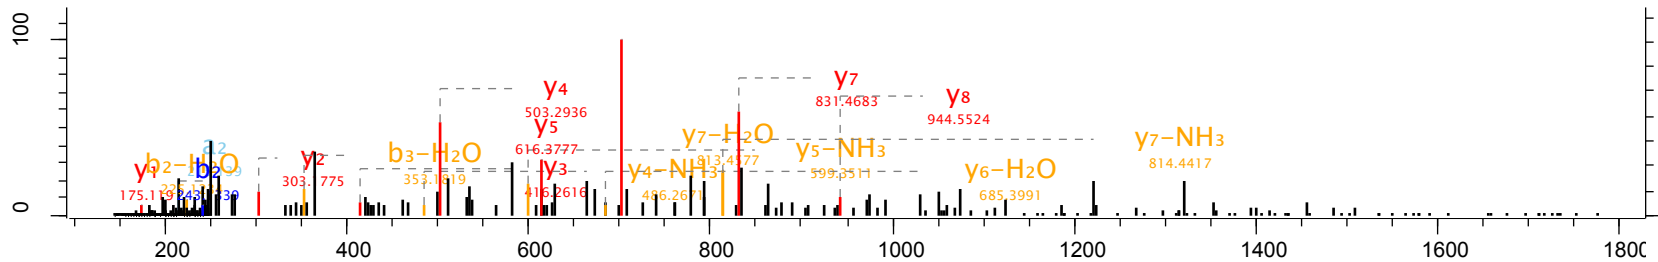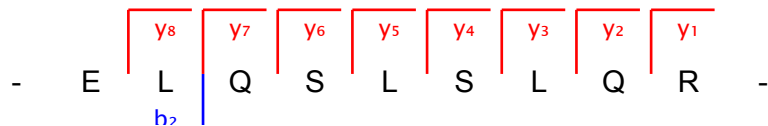

Raw file

20150226\_Hela\_Top\_opt\_A3\_01\_1595

Scan

28356

Method

TOF; CID

Score

76.24

m/z

528.27

Gene names

FAM32A

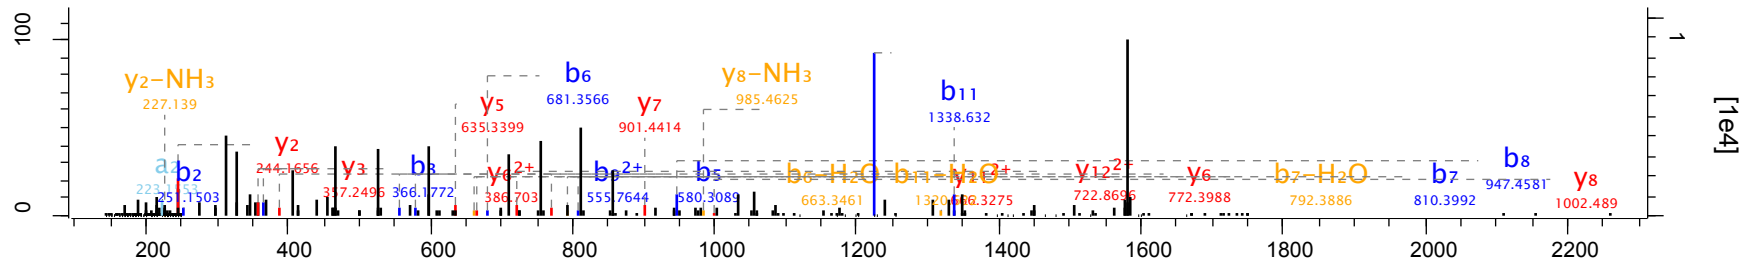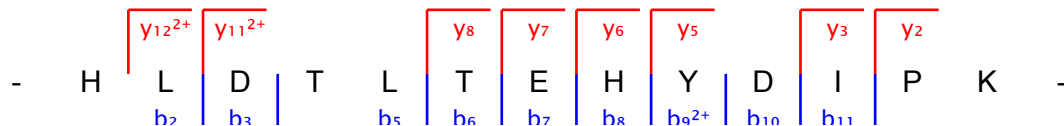

| Raw file                         | Scan  | Method   | Score | m/z   | Gene names |
|----------------------------------|-------|----------|-------|-------|------------|
| 20150226_Hela_Top_opt_A3_01_1595 | 28720 | TOF; CID | 69.92 | 797.4 | CHMP6      |

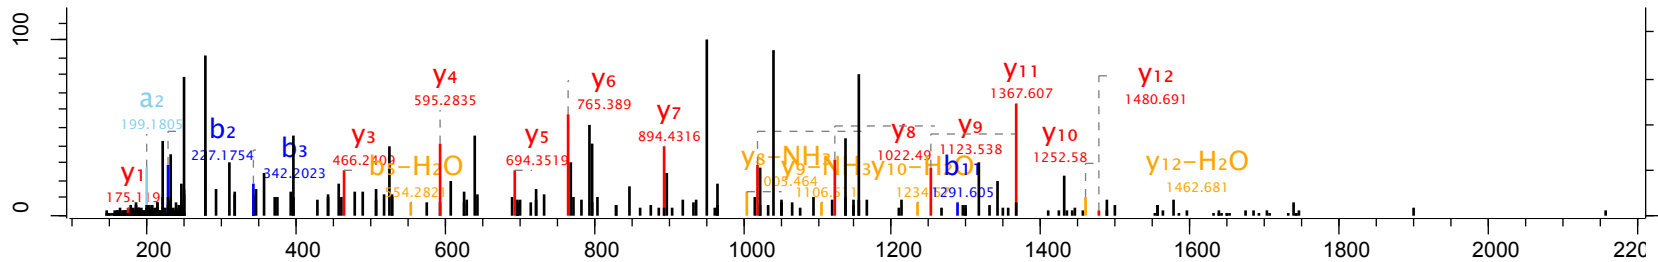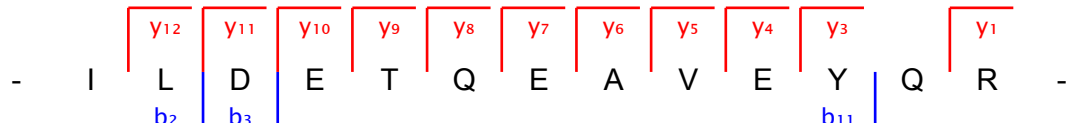

Raw file

20150226\_Hela\_Top\_opt\_A3\_01\_1595

Scan

30759

Method

TOF; CID

Score

65.22

m/z

456.29

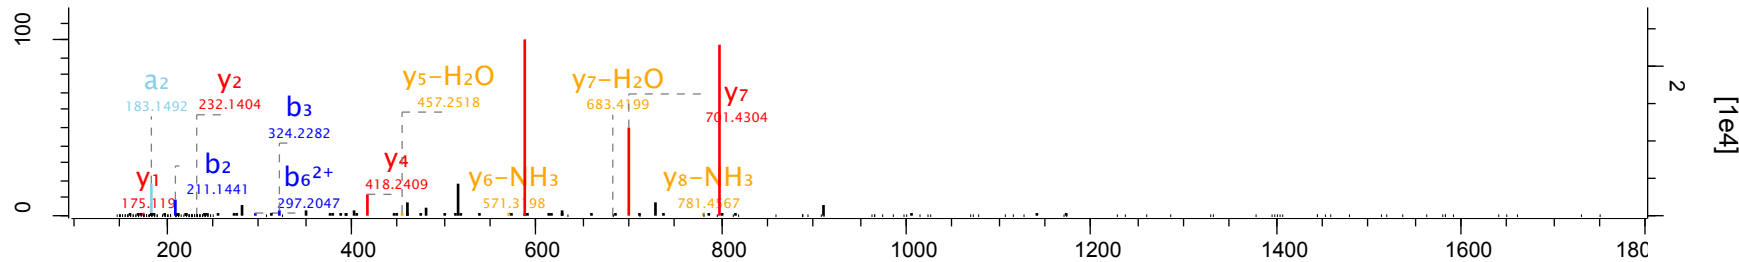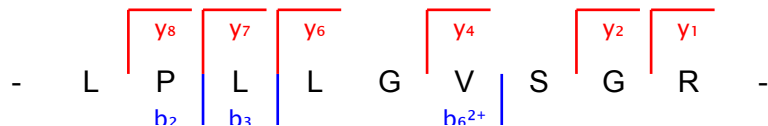



| Raw file                         | Scan  | Method   | Score | m/z    | Gene names |
|----------------------------------|-------|----------|-------|--------|------------|
| 20150226_Hela_Top_opt_A3_01_1595 | 31801 | TOF; CID | 71.88 | 679.36 | DAPK3      |

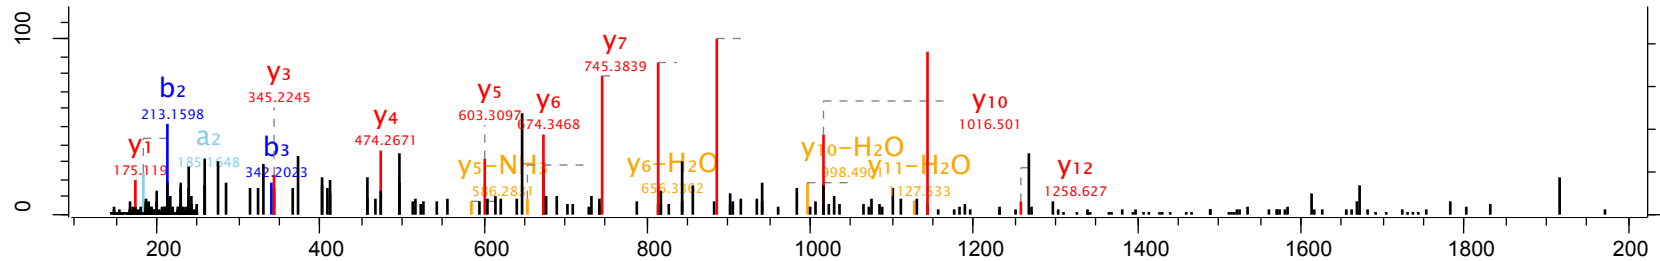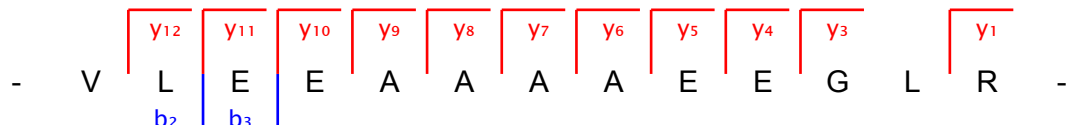

Raw file

20150226\_Hela\_Top\_opt\_A3\_01\_1595

Scan

32946

Method

TOF; CID

Score

63.91

m/z

476.27

Gene names

GOPC

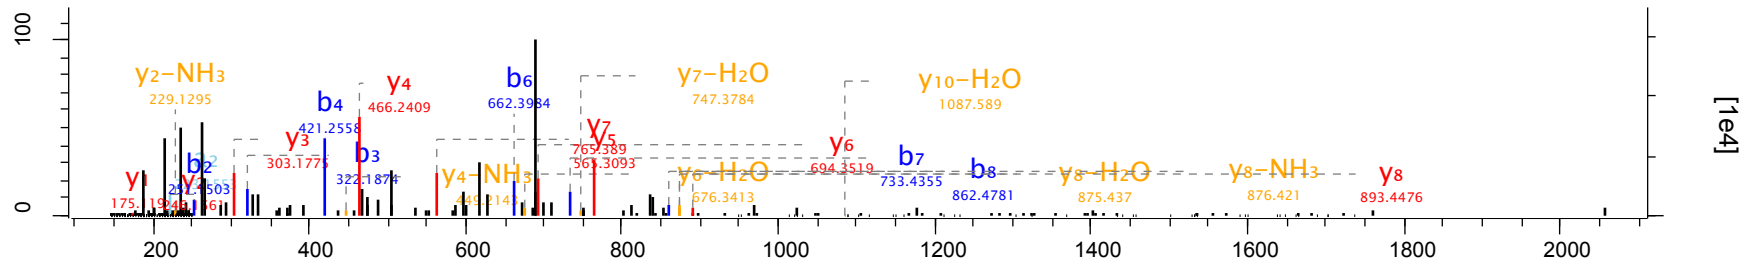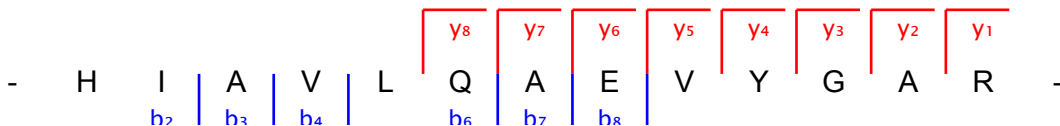

| Raw file                         | Scan  | Method   | Score | m/z    | Gene names |
|----------------------------------|-------|----------|-------|--------|------------|
| 20150226_Hela_Top_opt_A3_01_1595 | 33483 | TOF; CID | 69.2  | 467.27 | C1orf43    |

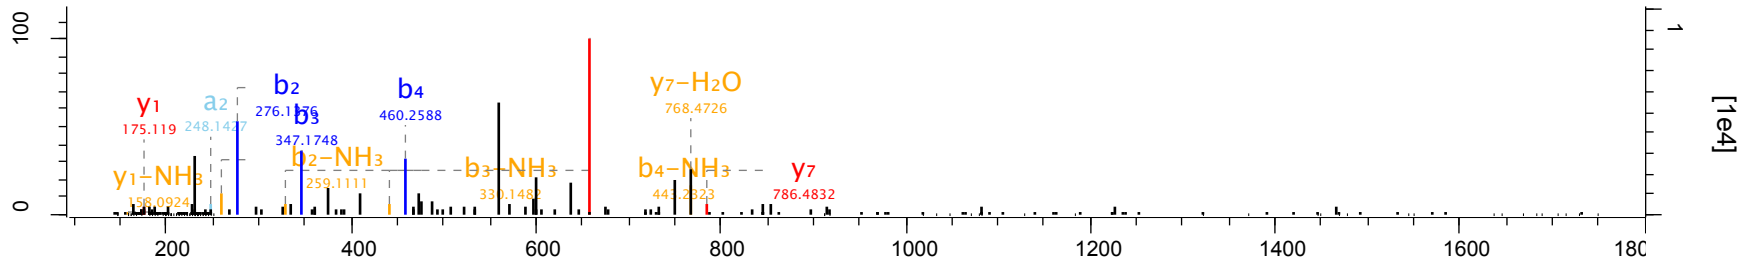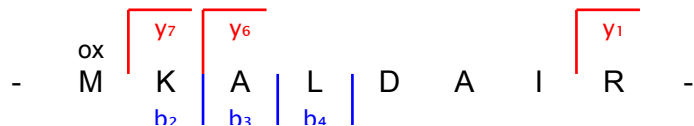

| Raw file                         | Scan  | Method   | Score | m/z    | Gene names |
|----------------------------------|-------|----------|-------|--------|------------|
| 20150226_Hela_Top_opt_A3_01_1595 | 34288 | TOF; CID | 93.88 | 371.26 | RTTN       |

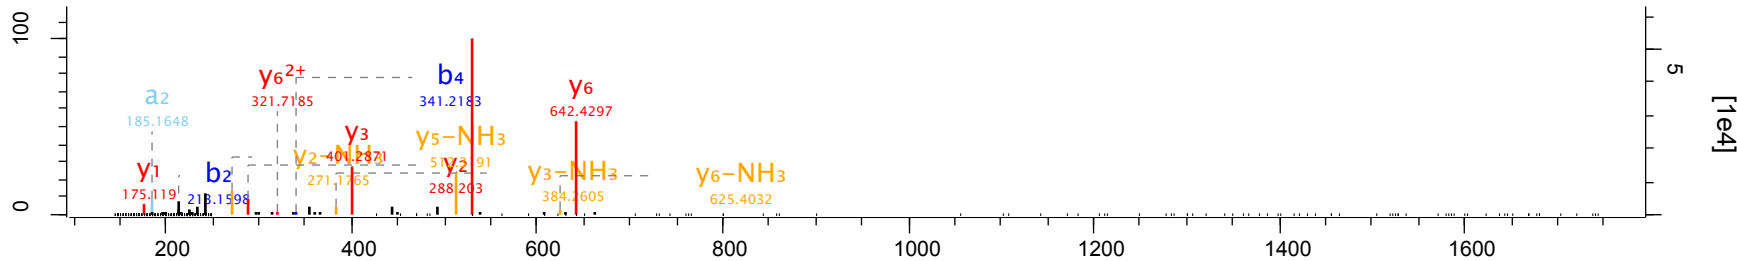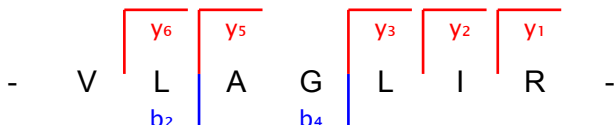

| Raw file                         | Scan  | Method   | Score | m/z    | Gene names |
|----------------------------------|-------|----------|-------|--------|------------|
| 20150226_Hela_Top_opt_A3_01_1595 | 34685 | TOF; CID | 66.3  | 529.29 | ALG8       |

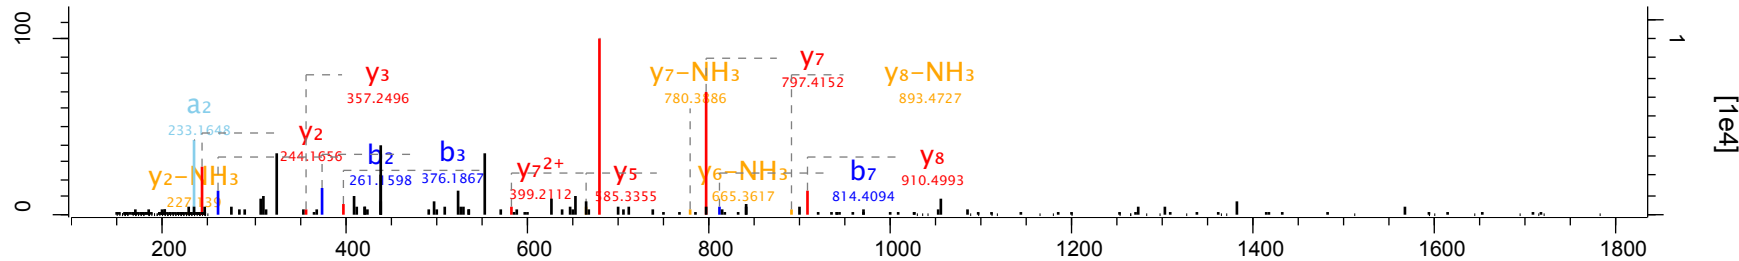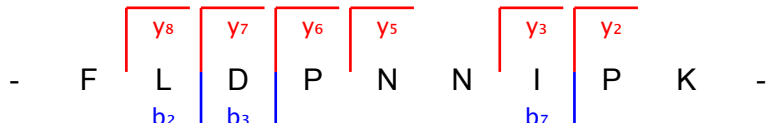

| Raw file                         | Scan  | Method   | Score | m/z    | Gene names |
|----------------------------------|-------|----------|-------|--------|------------|
| 20150226_Hela_Top_opt_A3_01_1595 | 34786 | TOF; CID | 84.3  | 854.36 | CXorf56    |

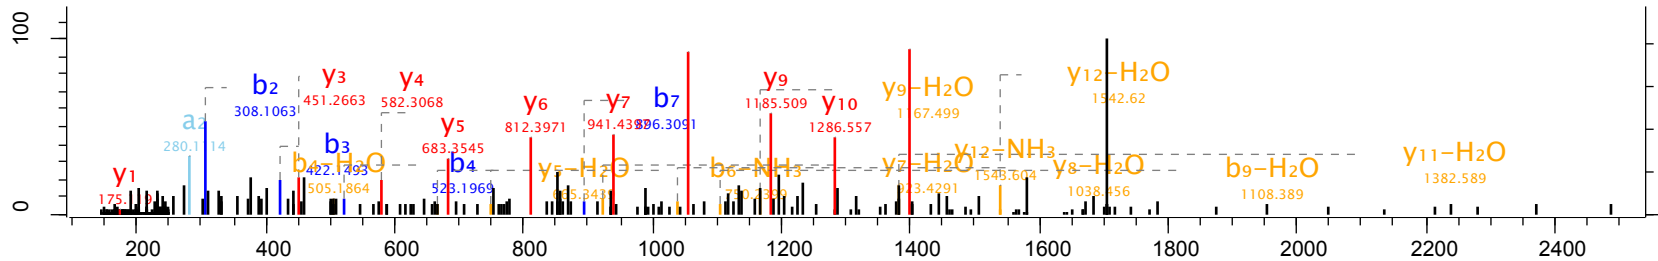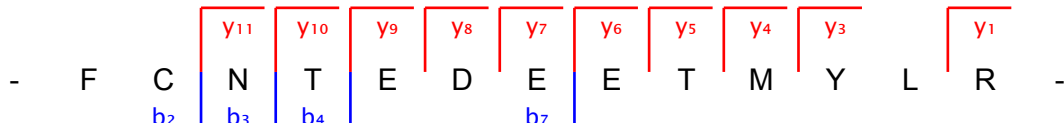

Raw file

20150226\_Hela\_Top\_opt\_A3\_01\_1595

Scan

35524

Method

TOF; CID

Score

76.82

m/z

603.63

Gene names

CDC37L1

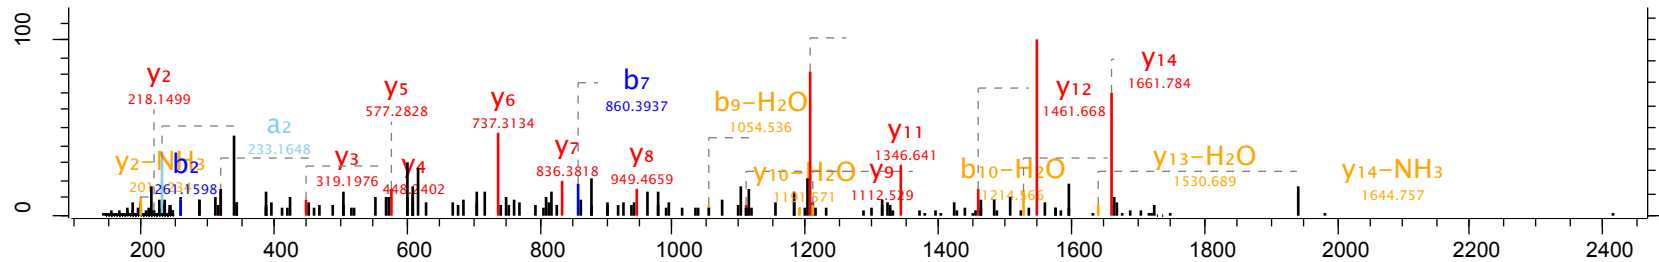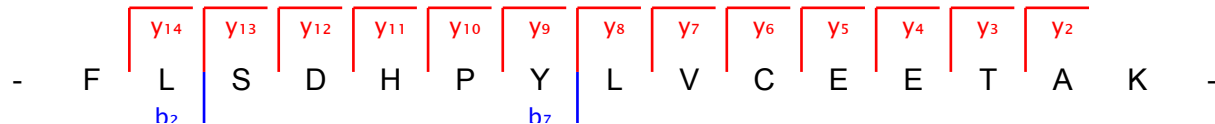

| Raw file                         | Scan  | Method   | Score | m/z    | Gene names |
|----------------------------------|-------|----------|-------|--------|------------|
| 20150226_Hela_Top_opt_A3_01_1595 | 36367 | TOF; CID | 127.3 | 650.35 | EIF1AD     |

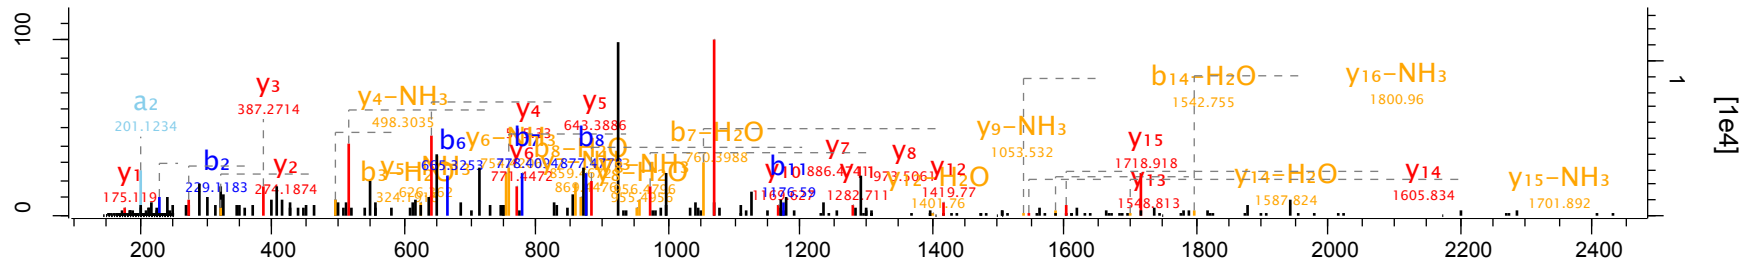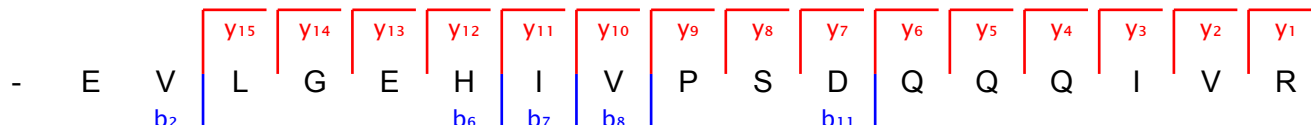



Raw file

20150226\_Hela\_Top\_opt\_A3\_01\_1595

Scan

37297

Method

TOF; CID

Score

63.79

m/z

698.85

Gene names

SLC37A4

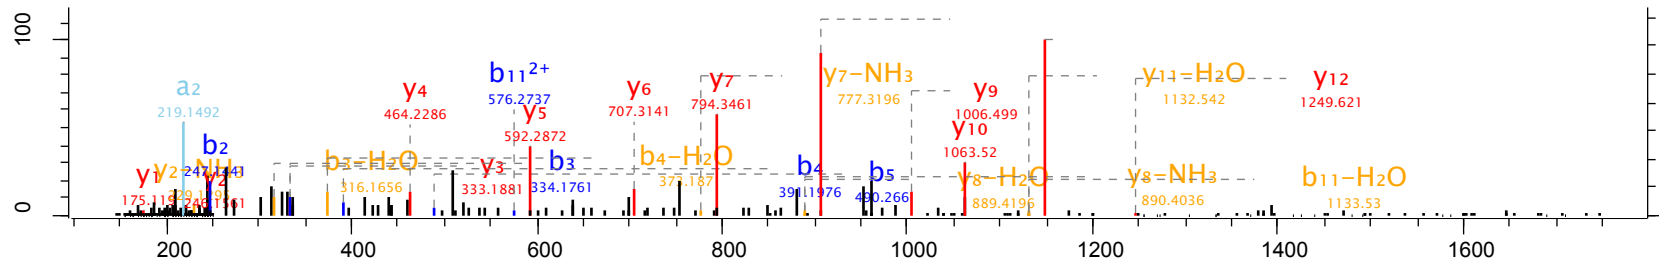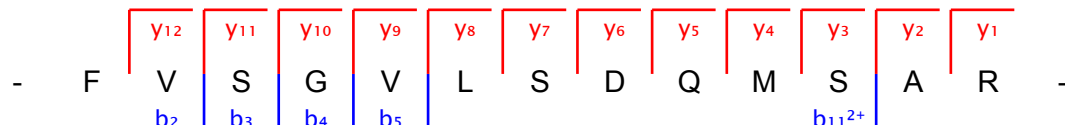

| Raw file                         | Scan  | Method   | Score | m/z    | Gene names |
|----------------------------------|-------|----------|-------|--------|------------|
| 20150226_Hela_Top_opt_A3_01_1595 | 37970 | TOF; CID | 48.22 | 542.31 | CDCA8      |

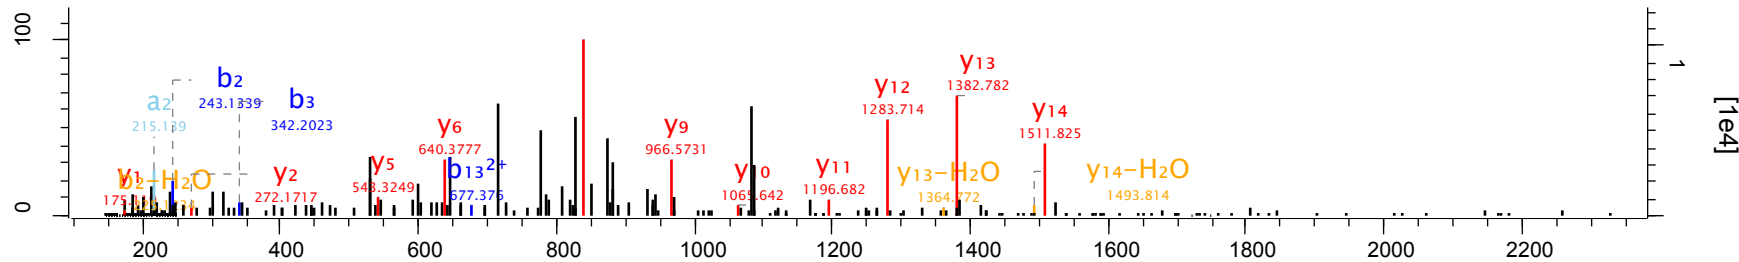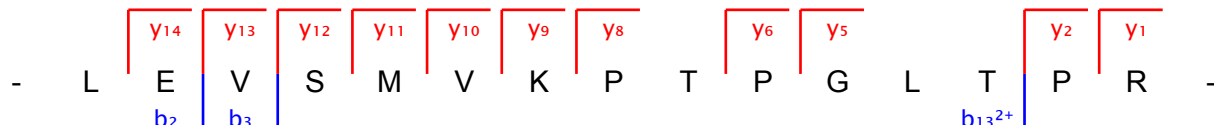

| Raw file                         | Scan  | Method   | Score | m/z    | Gene names |
|----------------------------------|-------|----------|-------|--------|------------|
| 20150226_Hela_Top_opt_A3_01_1595 | 39090 | TOF; CID | 46.89 | 904.43 | DCAF16     |

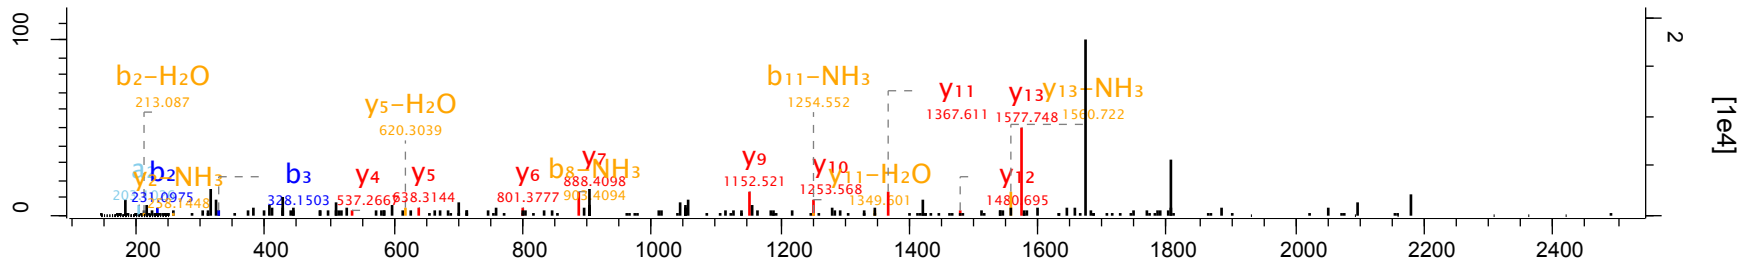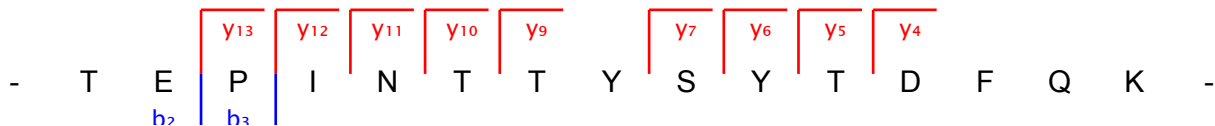

| Raw file                         | Scan  | Method   | Score | m/z   | Gene names |
|----------------------------------|-------|----------|-------|-------|------------|
| 20150226_Hela_Top_opt_A3_01_1595 | 39300 | TOF; CID | 79.16 | 579.3 | POLR3K     |

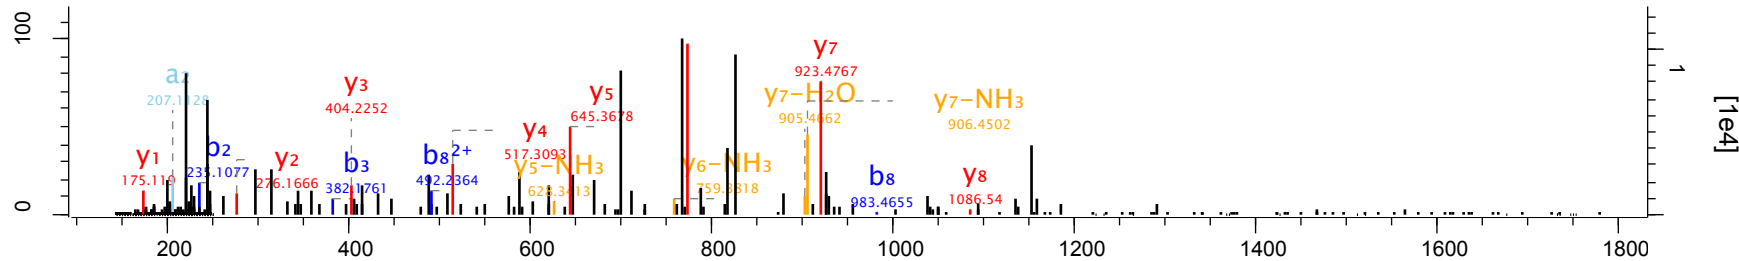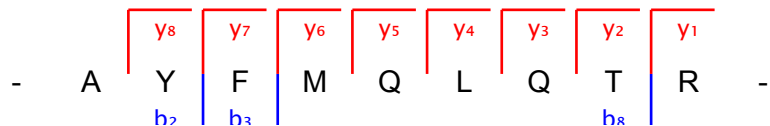

| Raw file                         | Scan  | Method   | Score | m/z    | Gene names |
|----------------------------------|-------|----------|-------|--------|------------|
| 20150226_Hela_Top_opt_A3_01_1595 | 40423 | TOF; CID | 89.14 | 806.43 | ERICH1     |

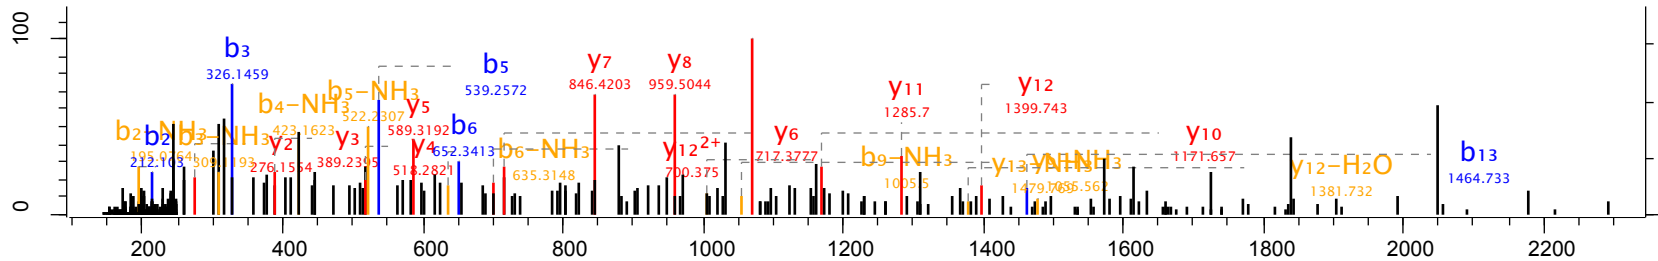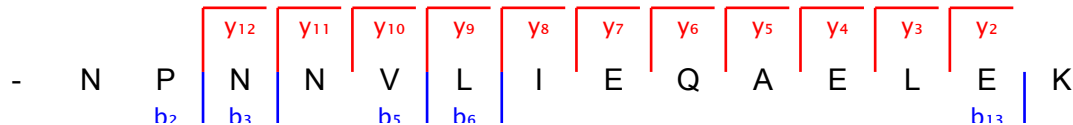

Raw file

20150226\_Hela\_Top\_opt\_A3\_01\_1595

Scan

40639

Method

TOF; CID

Score

78.95

m/z

928.47

Gene names

KLHL7

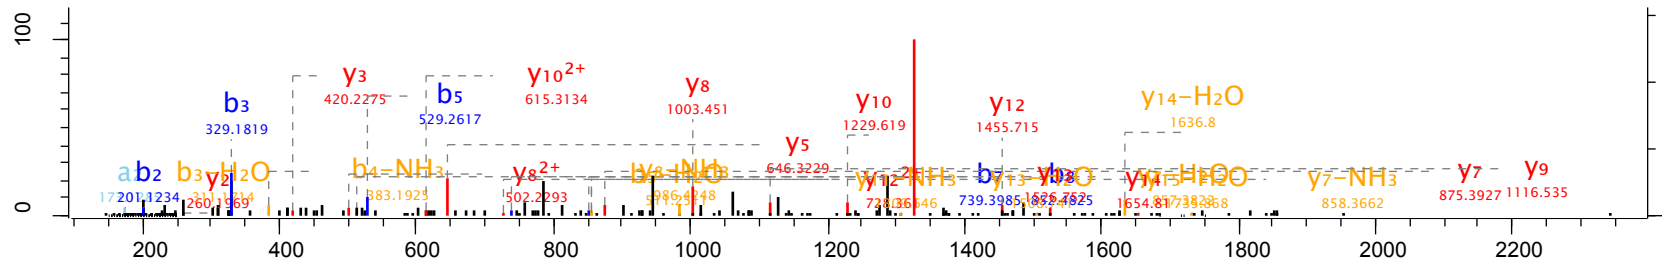

[1e4]

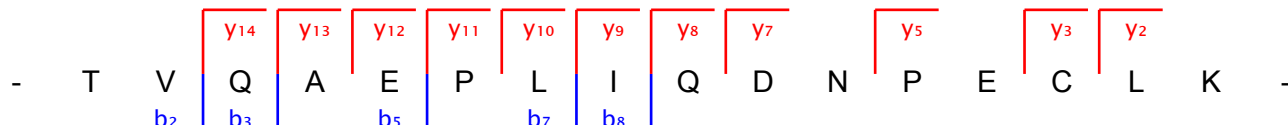

Raw file

Scan

Method

Score

m/z

Gene names

20150226\_Hela\_Top\_opt\_A3\_01\_1595

40657

TOF; CID

38.45

961.7

TCF3

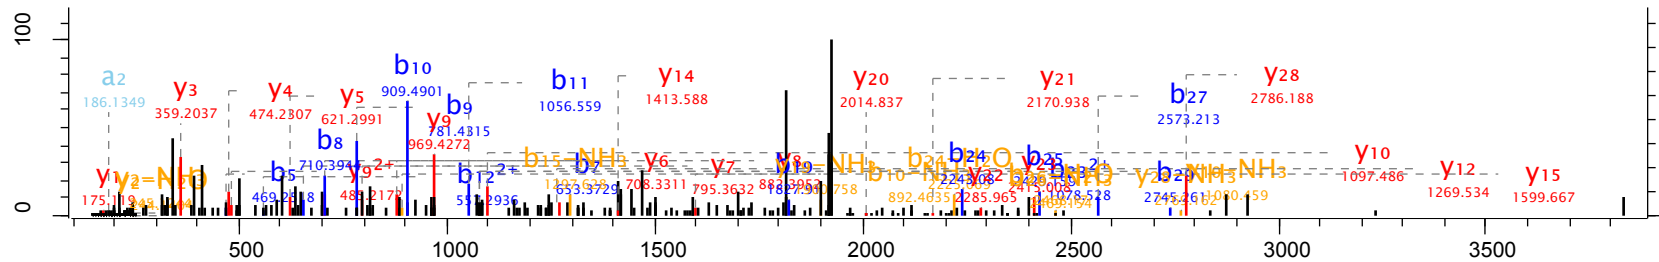

- G R P A S L A G A Q F G G S G L E D R P S

a<sub>2</sub> h<sub>5</sub> h<sub>7</sub> h<sub>8</sub> h<sub>9</sub> h<sub>10</sub> h<sub>11</sub> h<sub>12</sub><sup>2+</sup> h<sub>19</sub> y<sub>20</sub> y<sub>21</sub> y<sub>22</sub> y<sub>23</sub> y<sub>28</sub>

| Raw file                         | Scan  | Method   | Score | m/z    | Gene names |
|----------------------------------|-------|----------|-------|--------|------------|
| 20150226_Hela_Top_opt_A3_01_1595 | 40943 | TOF; CID | 57.16 | 615.34 | YTHDC1     |

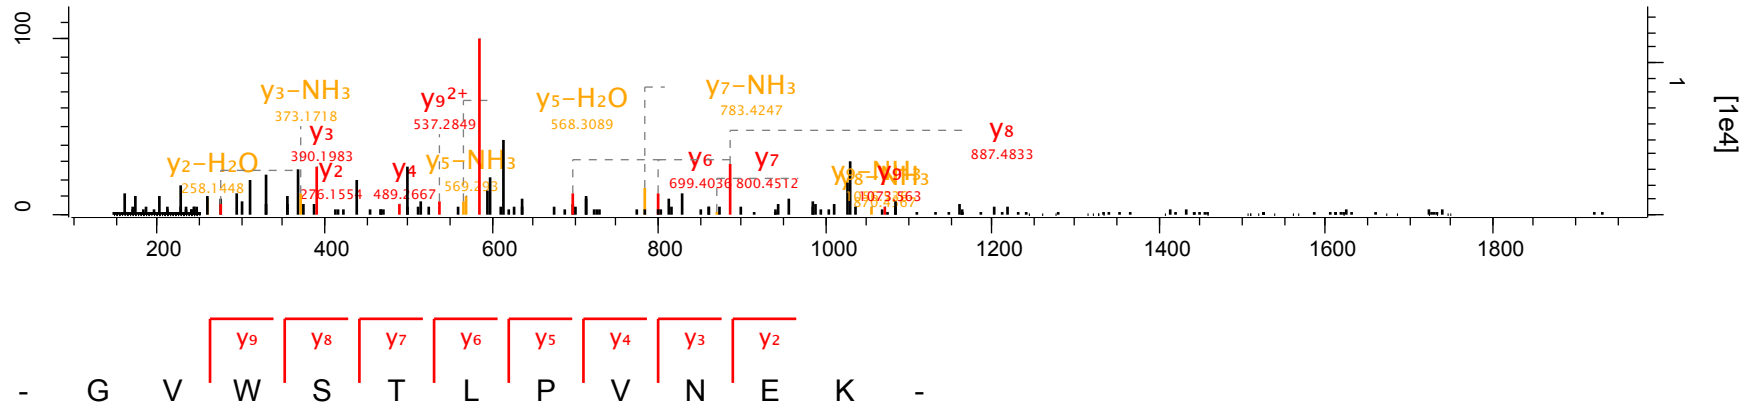



| Raw file                         | Scan  | Method   | Score | m/z    | Gene names |
|----------------------------------|-------|----------|-------|--------|------------|
| 20150226_Hela_Top_opt_A3_01_1595 | 40992 | TOF; CID | 69.48 | 857.87 | MT-ND3     |

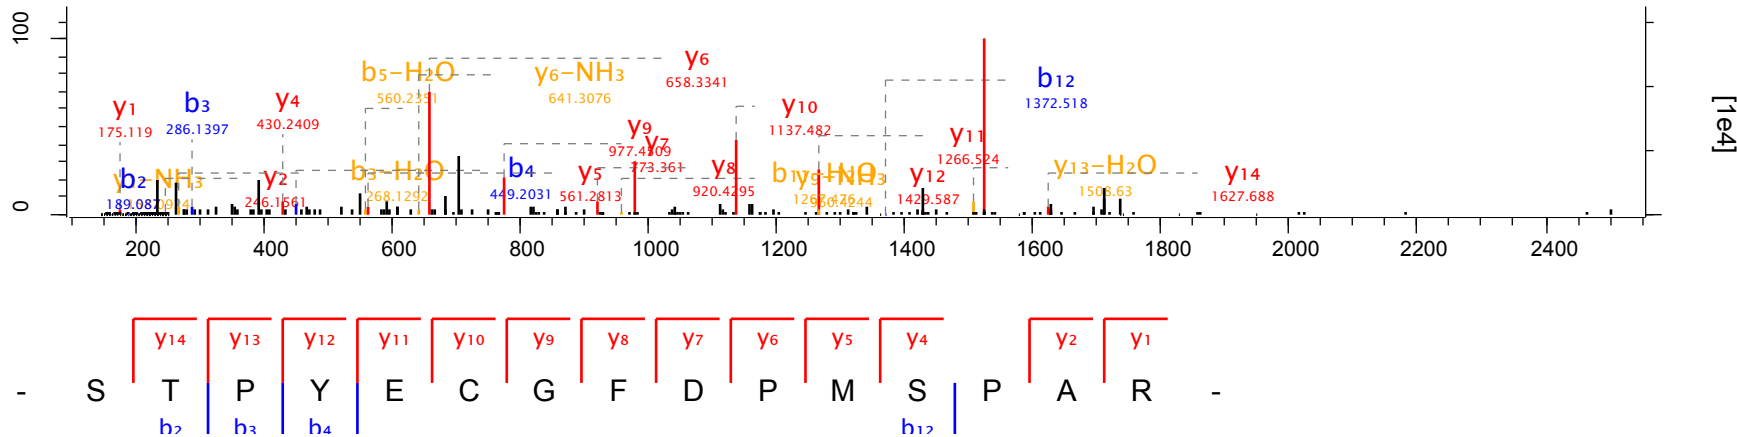

| Raw file                         | Scan  | Method   | Score  | m/z    | Gene names |
|----------------------------------|-------|----------|--------|--------|------------|
| 20150226_Hela_Top_opt_A3_01_1595 | 41403 | TOF; CID | 100.23 | 874.44 | BRI3       |

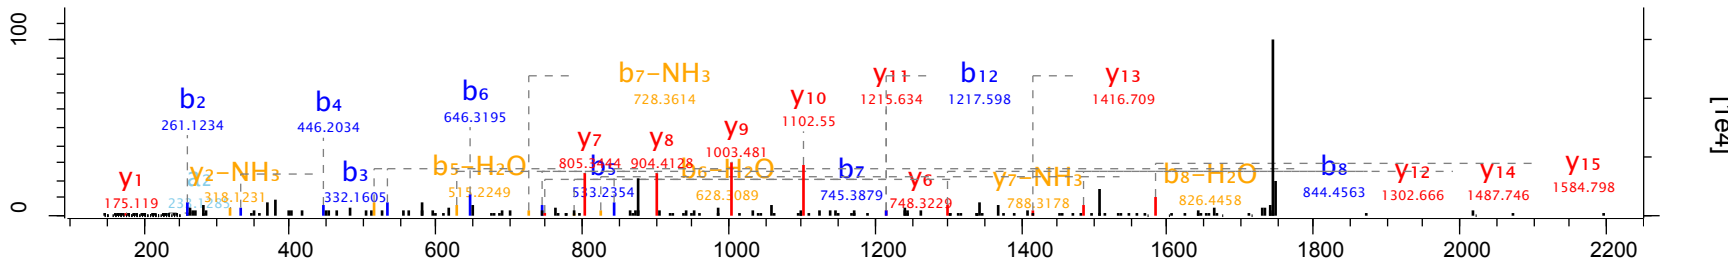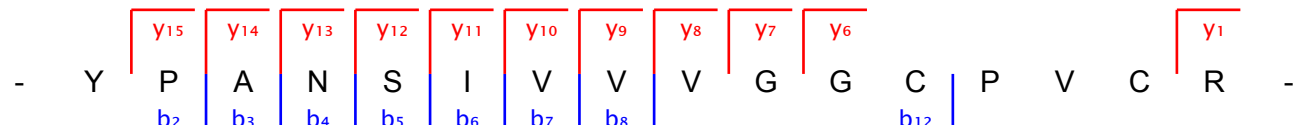

Raw file

20150226\_Hela\_Top\_opt\_A3\_01\_1595

Scan

44724

Method

TOF; CID

Score

91.73

m/z

1127.09

Gene names

MZT2B;MZT2A

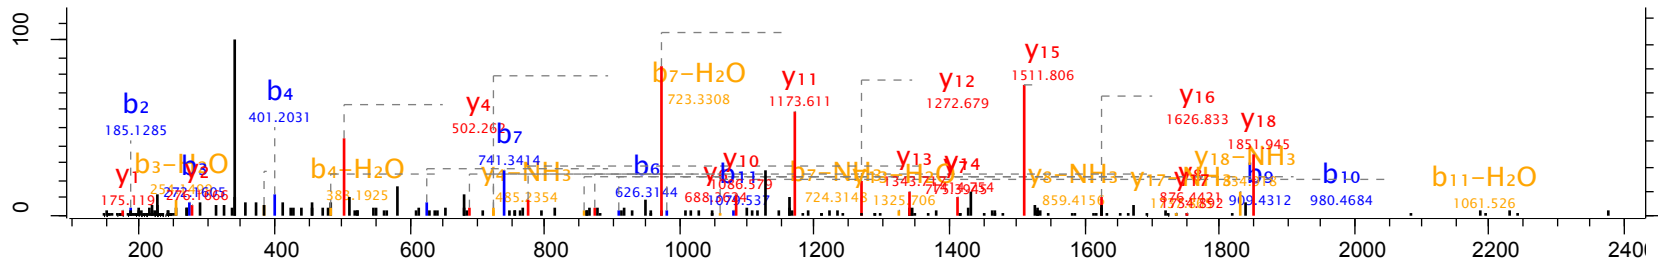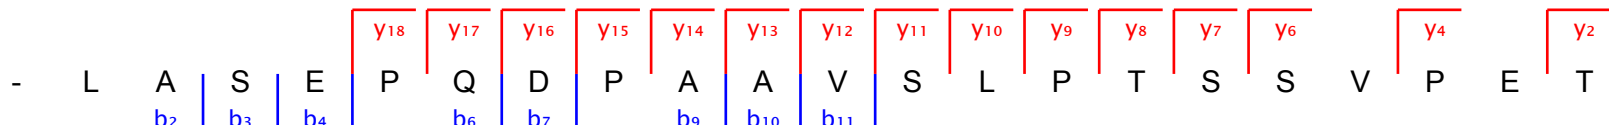

| Raw file                         | Scan  | Method   | Score | m/z   | Gene names   |
|----------------------------------|-------|----------|-------|-------|--------------|
| 20150226_Hela_Top_opt_A3_01_1595 | 45267 | TOF; CID | 92.04 | 670.9 | LOC102288414 |

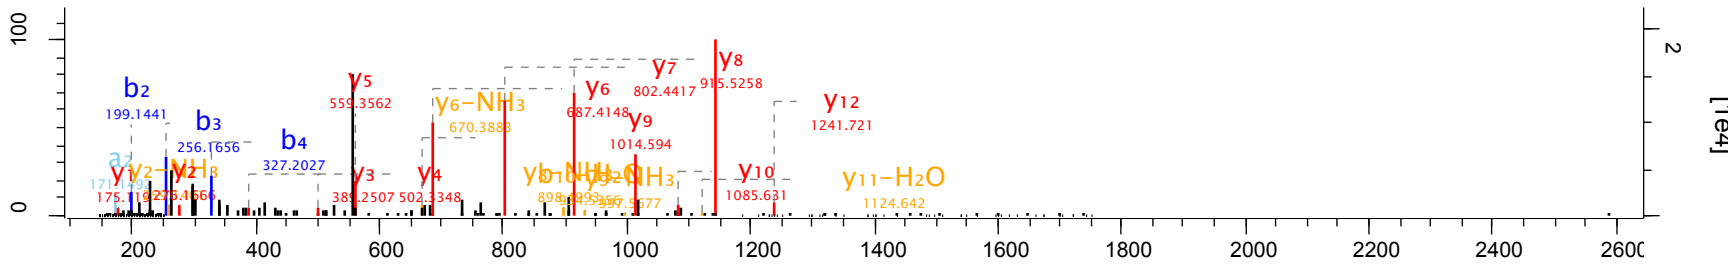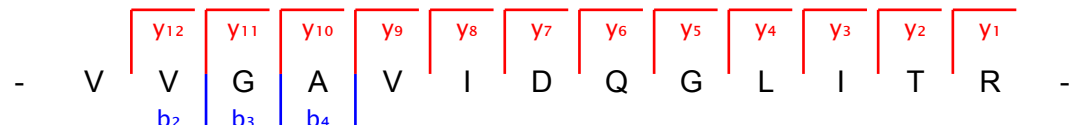

| Raw file                         | Scan  | Method   | Score | m/z     | Gene names |
|----------------------------------|-------|----------|-------|---------|------------|
| 20150226_Hela_Top_opt_A3_01_1595 | 45342 | TOF; CID | 72.32 | 1127.08 | MYADM      |

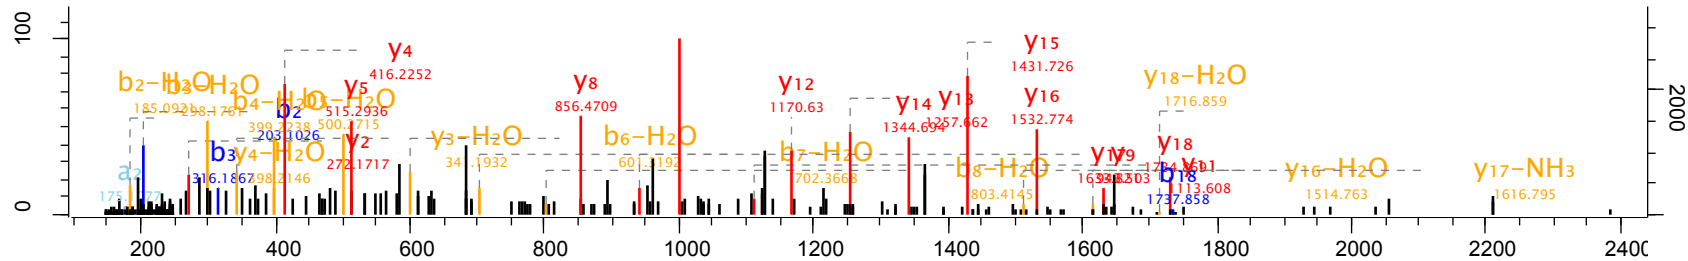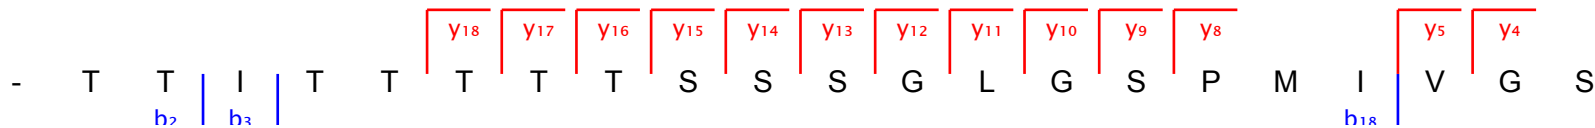

Raw file

20150226\_Hela\_Top\_opt\_A3\_01\_1595

Scan

46462

Method

TOF; CID

Score

58.63

m/z

575.79

Gene names

LYPLAL1

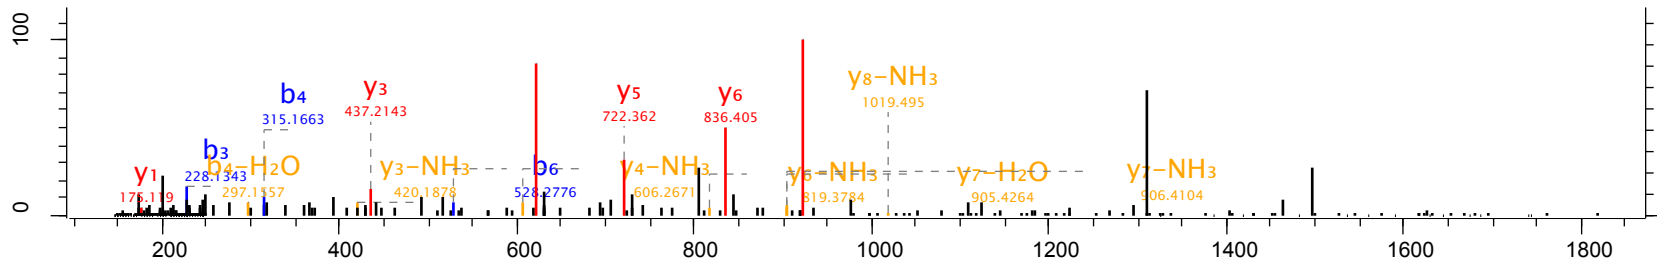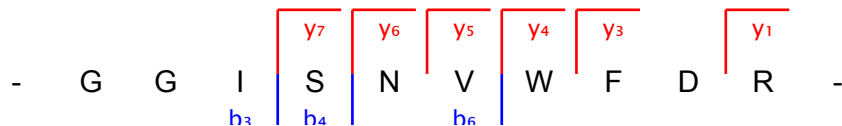

Raw file

20150226\_Hela\_Top\_opt\_A3\_01\_1595

Scan

46499

Method

TOF; CID

Score

65.21

m/z

776.4

Gene names

COG1;ADCK1

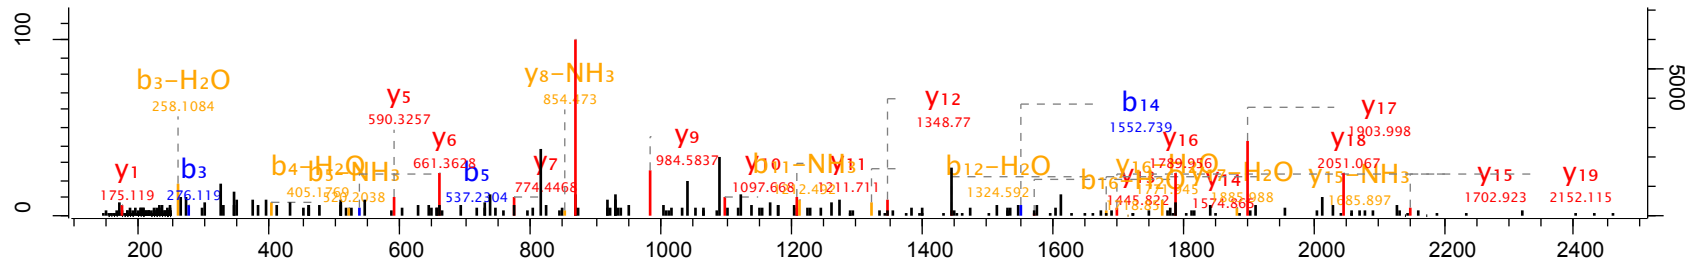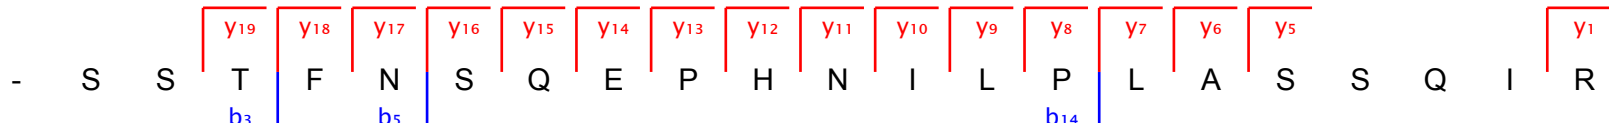

Raw file

Scan

Method

Score

m/z

Gene names

20150226\_Hela\_Top\_opt\_A3\_01\_1595

46625

TOF; CID

59.07

489.28

GATC

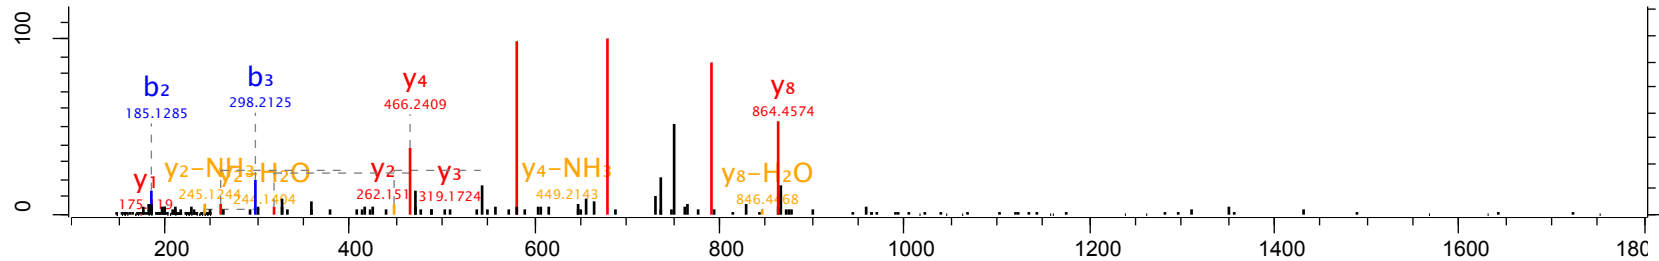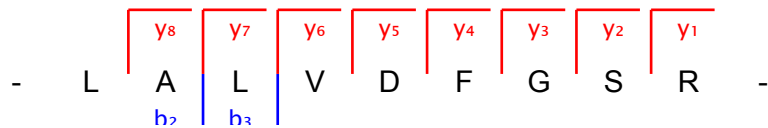



| Raw file                         | Scan  | Method   | Score | m/z    | Gene names |
|----------------------------------|-------|----------|-------|--------|------------|
| 20150226_Hela_Top_opt_A3_01_1595 | 47331 | TOF; CID | 43.16 | 962.47 | CDC42SE2   |

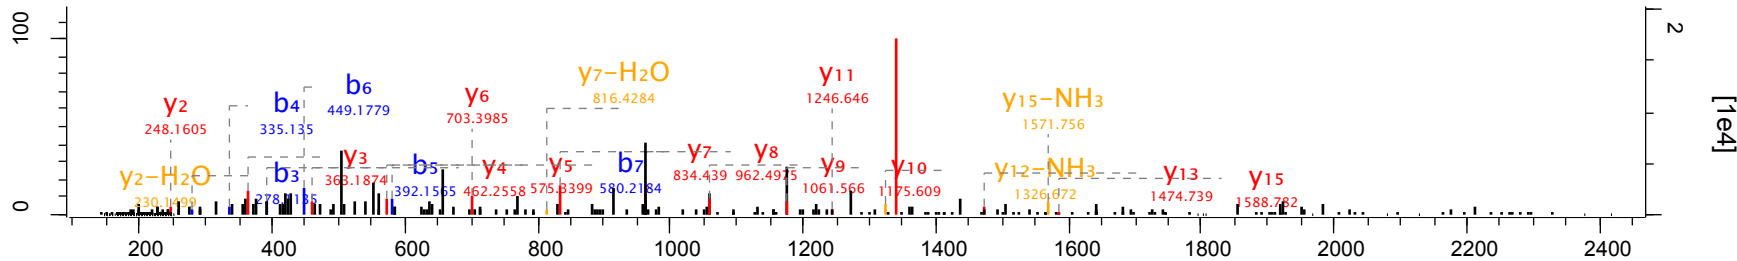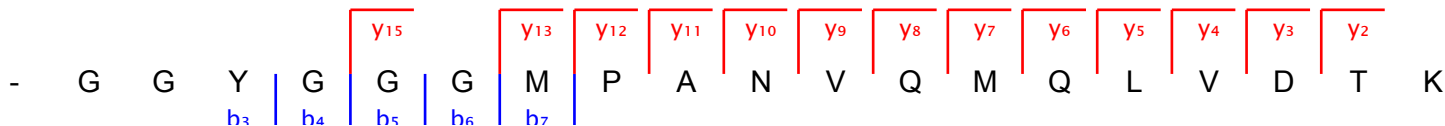

Raw file

20150226\_Hela\_Top\_opt\_A3\_01\_1595

Scan

47513

Method

TOF; CID

Score

96.67

m/z

562.96

Gene names

PHKG2

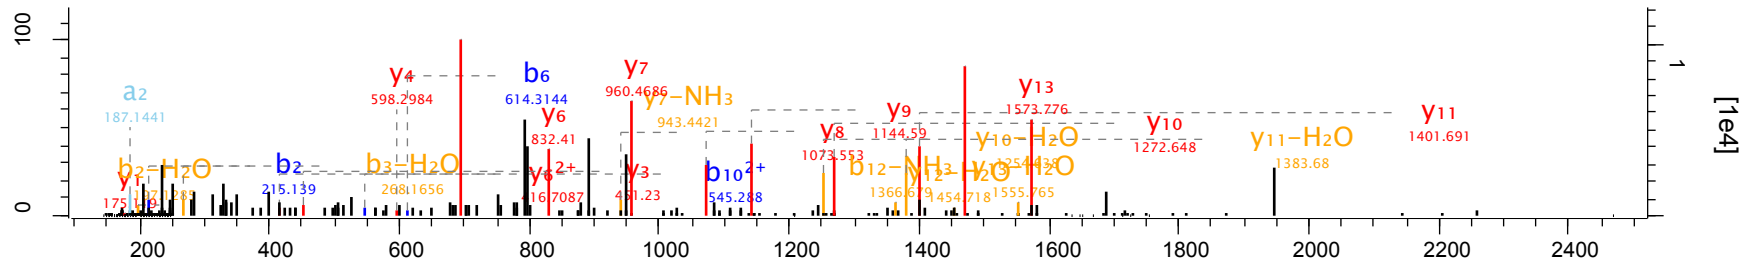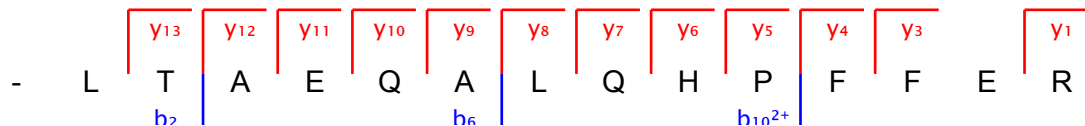

Raw file

20150226\_Hela\_Top\_opt\_A3\_01\_1595

Scan

47727

Method

TOF; CID

Score

56.42

m/z

1092.54

Gene names

FAM107B

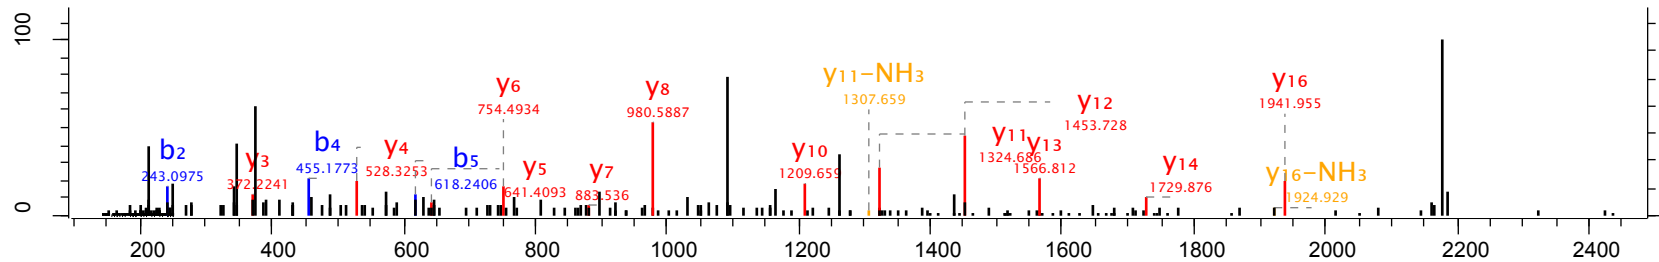

ac

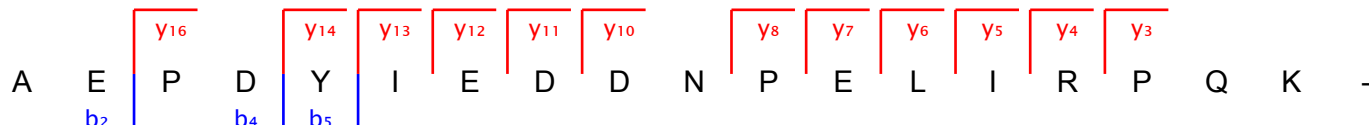

Raw file

20150226\_Hela\_Top\_opt\_A3\_01\_1595

Scan

48541

Method

TOF; CID

Score

108.71

m/z

956.99

Gene names

GTPBP3

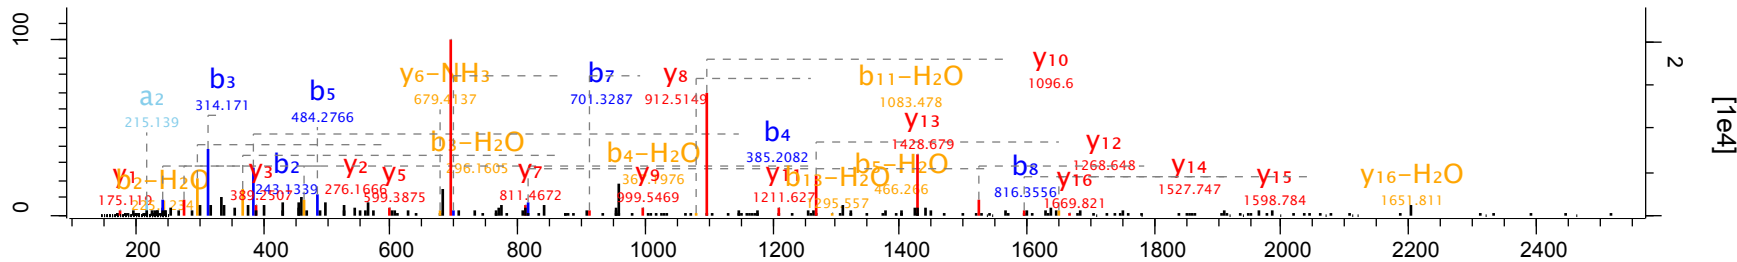

- E L A A V C G D P S T D P P L L T R -

b<sub>2</sub> b<sub>3</sub> b<sub>4</sub> b<sub>5</sub> b<sub>7</sub> b<sub>8</sub>

y<sub>16</sub> y<sub>15</sub> y<sub>14</sub> y<sub>13</sub> y<sub>12</sub> y<sub>11</sub> y<sub>10</sub> y<sub>9</sub> y<sub>8</sub> y<sub>7</sub> y<sub>6</sub> y<sub>5</sub> y<sub>3</sub> y<sub>2</sub> y<sub>1</sub>

| Raw file                         | Scan  | Method   | Score | m/z    | Gene names |
|----------------------------------|-------|----------|-------|--------|------------|
| 20150226_Hela_Top_opt_A3_01_1595 | 49913 | TOF; CID | 94.77 | 627.39 | MRPL34     |

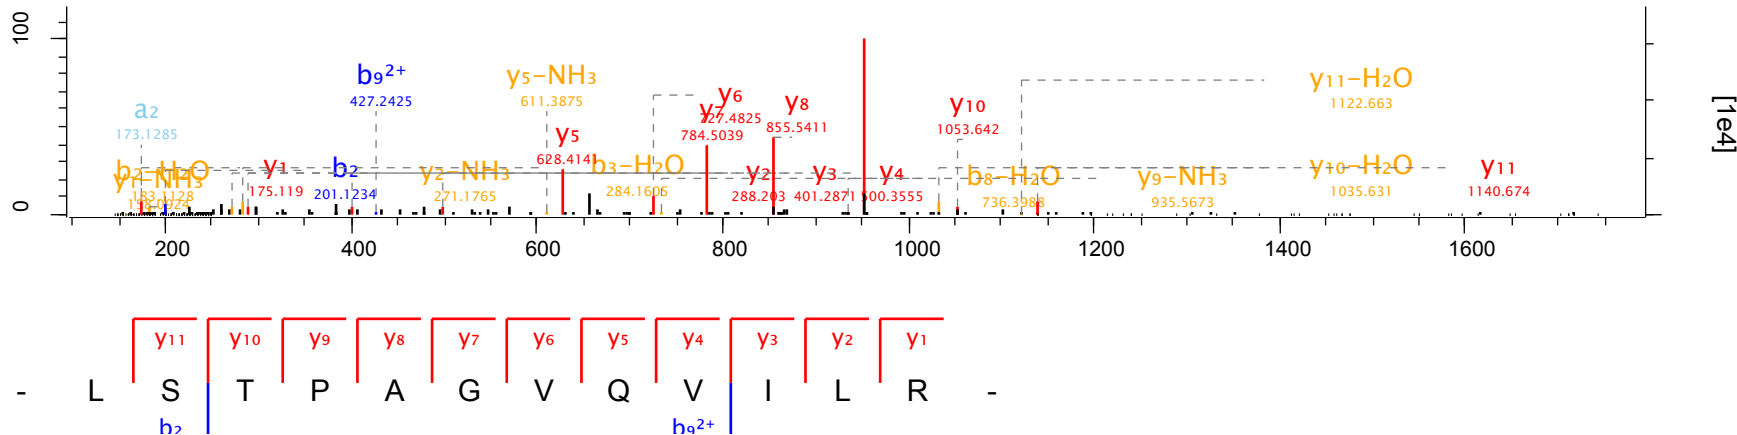

Raw file

Scan

Method

Score

m/z

Gene names

20150226\_Hela\_Top\_opt\_A3\_01\_1595

50753

TOF; CID

71.59

865.99

KRTCAP2

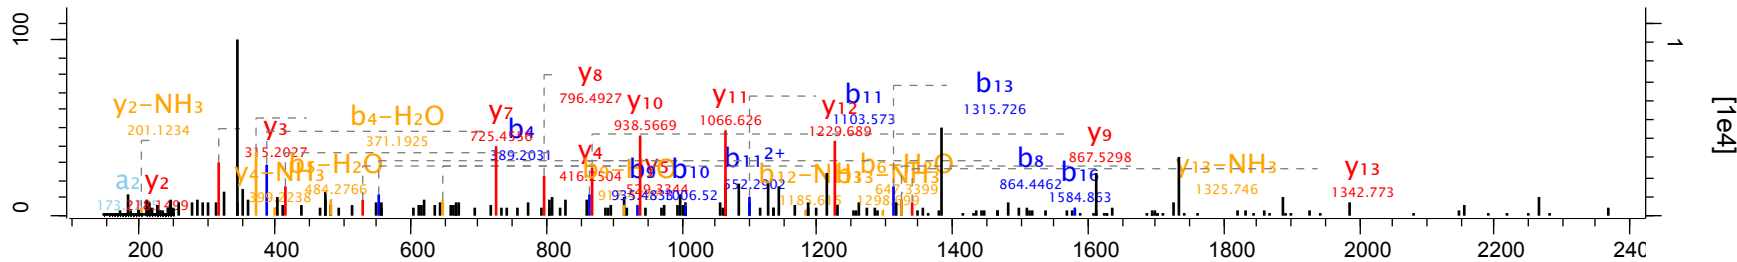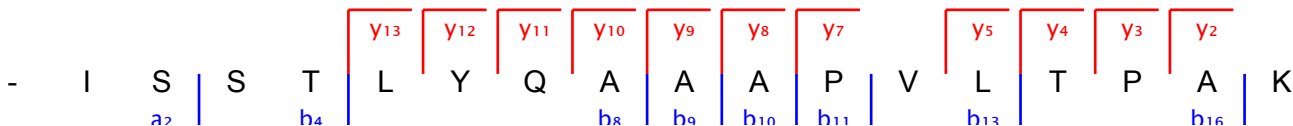

| Raw file                         | Scan  | Method   | Score | m/z    | Gene names |
|----------------------------------|-------|----------|-------|--------|------------|
| 20150226_Hela_Top_opt_A3_01_1595 | 50898 | TOF; CID | 60.06 | 941.45 | FAM168B    |

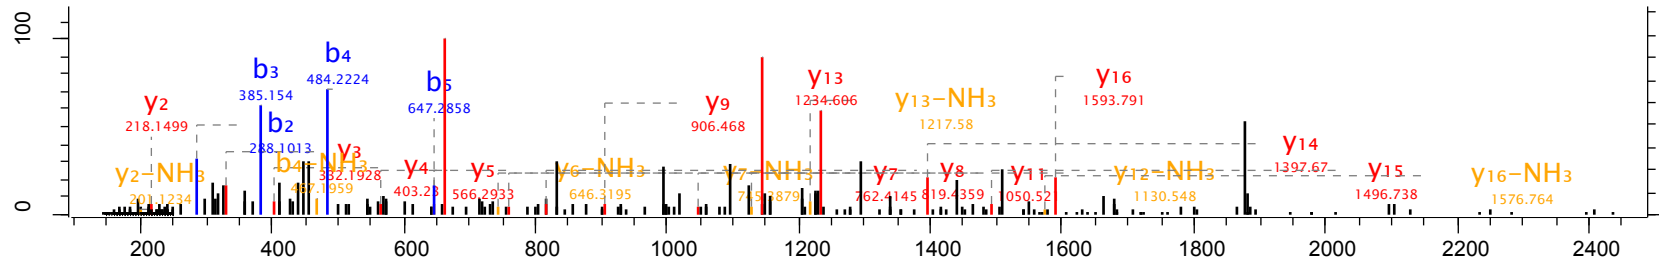

ac

- M N P V Y S P G S S G V P Y A N A K -

b<sub>2</sub> b<sub>3</sub> b<sub>4</sub> b<sub>5</sub>

y<sub>16</sub> y<sub>15</sub> y<sub>14</sub> y<sub>13</sub> y<sub>12</sub> y<sub>11</sub> y<sub>9</sub> y<sub>8</sub> y<sub>7</sub> y<sub>6</sub> y<sub>5</sub> y<sub>4</sub> y<sub>3</sub> y<sub>2</sub>

| Raw file                         | Scan  | Method   | Score | m/z    | Gene names |
|----------------------------------|-------|----------|-------|--------|------------|
| 20150226_Hela_Top_opt_A3_01_1595 | 50934 | TOF; CID | 140.6 | 579.02 | TMEM11     |

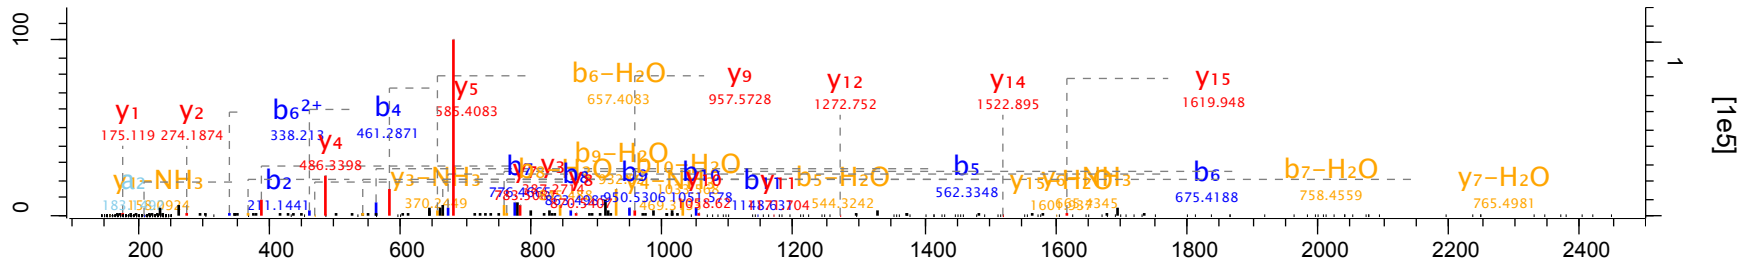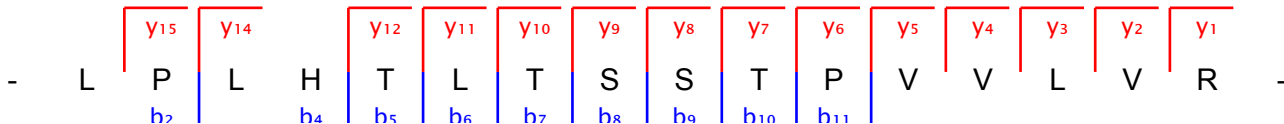



Raw file

20150226\_Hela\_Top\_opt\_A3\_01\_1595

Scan

51058

Method

TOF; CID

Score

86.08

m/z

873.45

Gene names

MCM3AP

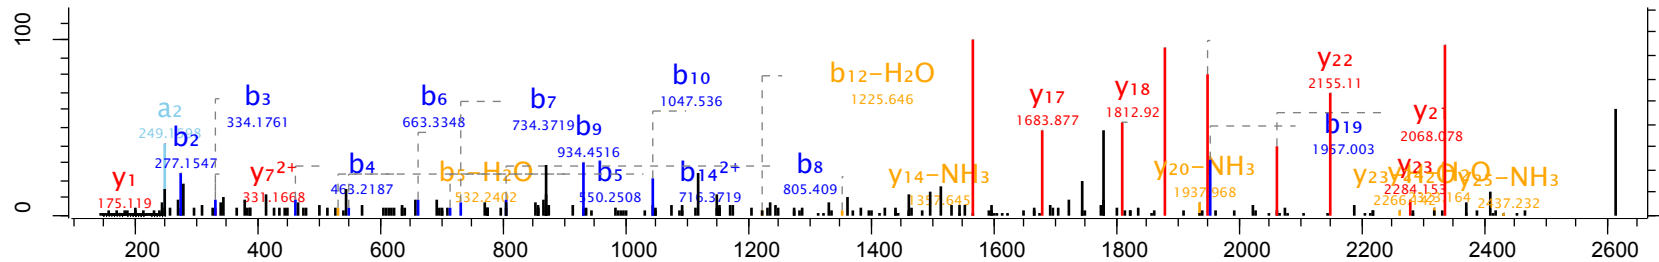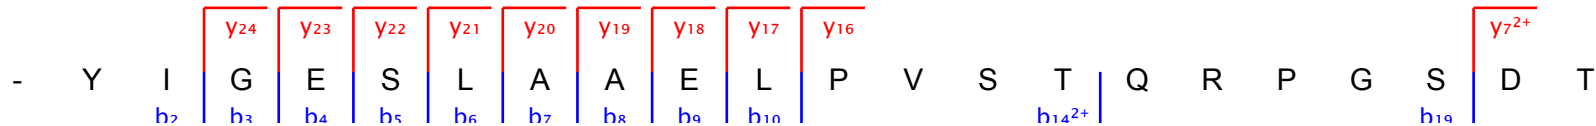

| Raw file                         | Scan  | Method   | Score | m/z    | Gene names   |
|----------------------------------|-------|----------|-------|--------|--------------|
| 20150226_Hela_Top_opt_A3_01_1595 | 51538 | TOF; CID | 73.25 | 464.78 | POC1B;TUWD12 |

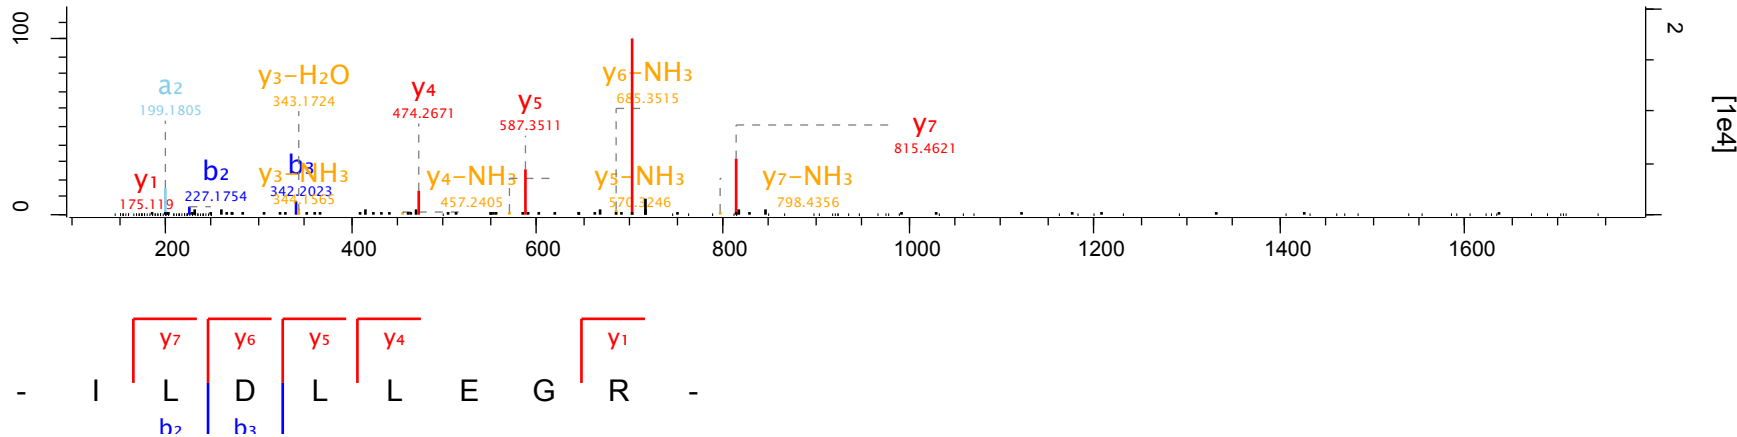

| Raw file                         | Scan  | Method   | Score | m/z   | Gene names |
|----------------------------------|-------|----------|-------|-------|------------|
| 20150226_Hela_Top_opt_A3_01_1595 | 51725 | TOF; CID | 52.89 | 713.4 | DTWD2      |

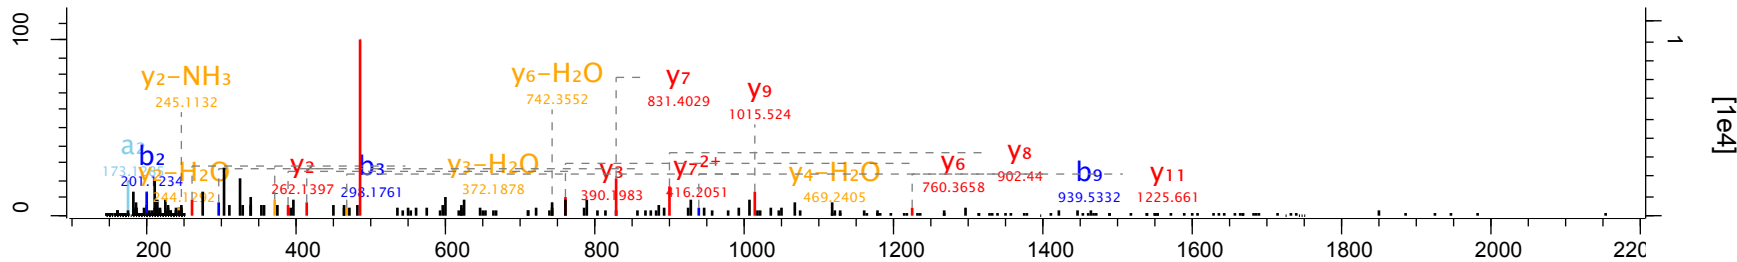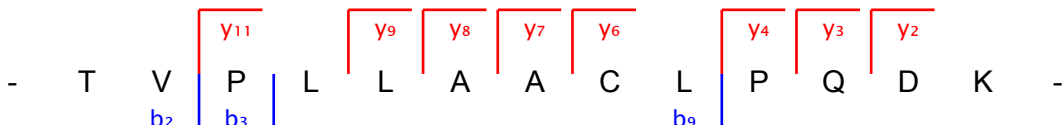

| Raw file                         | Scan  | Method   | Score | m/z     | Gene names |
|----------------------------------|-------|----------|-------|---------|------------|
| 20150226_Hela_Top_opt_A3_01_1595 | 52240 | TOF; CID | 48.8  | 1206.57 | DNAJC5     |

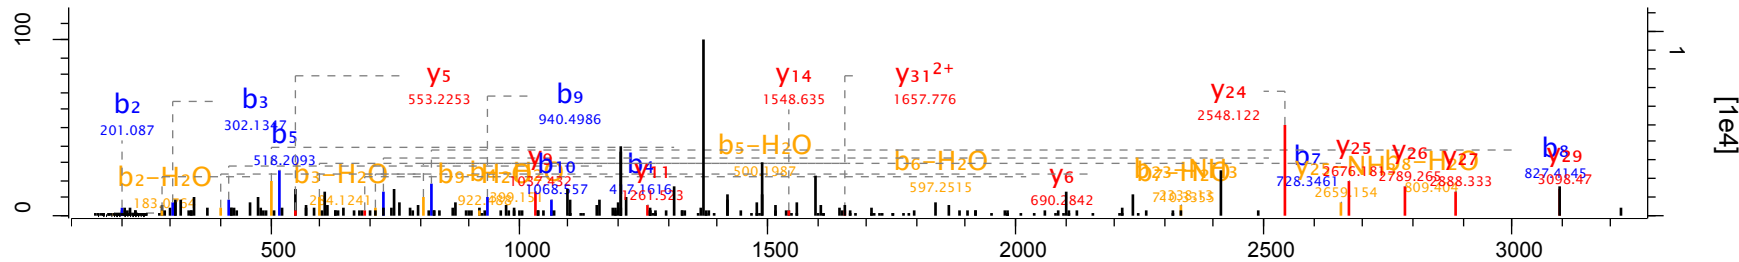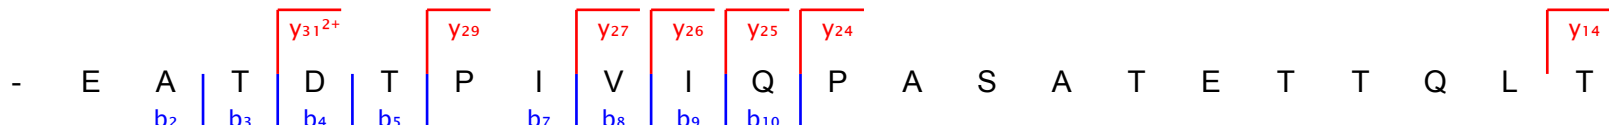

Raw file

20150226\_Hela\_Top\_opt\_A3\_01\_1595

Scan

52823

Method

TOF; CID

Score

40.29

m/z

807.42

Gene names

FYCO1

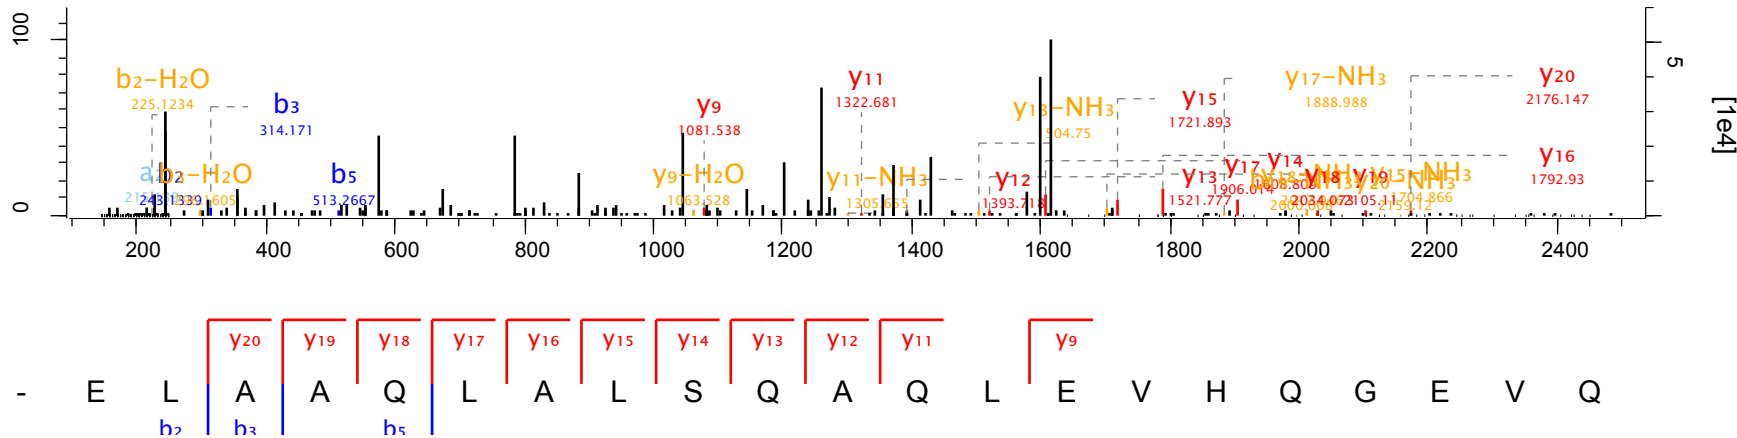

| Raw file                         | Scan  | Method   | Score | m/z    | Gene names |
|----------------------------------|-------|----------|-------|--------|------------|
| 20150226_Hela_Top_opt_A3_01_1595 | 53411 | TOF; CID | 52.86 | 580.64 | UFSP2      |

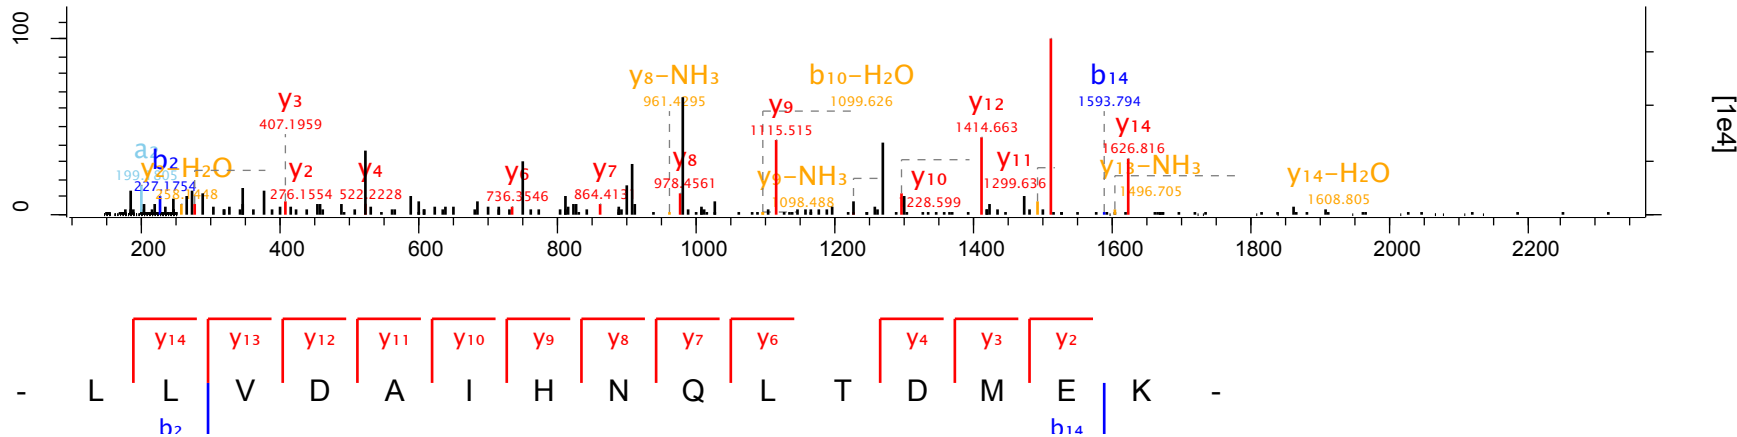

Raw file

20150226\_Hela\_Top\_opt\_A3\_01\_1595

Scan

54460

Method

TOF; CID

Score

63.44

m/z

904.46

Gene names

TAF6L

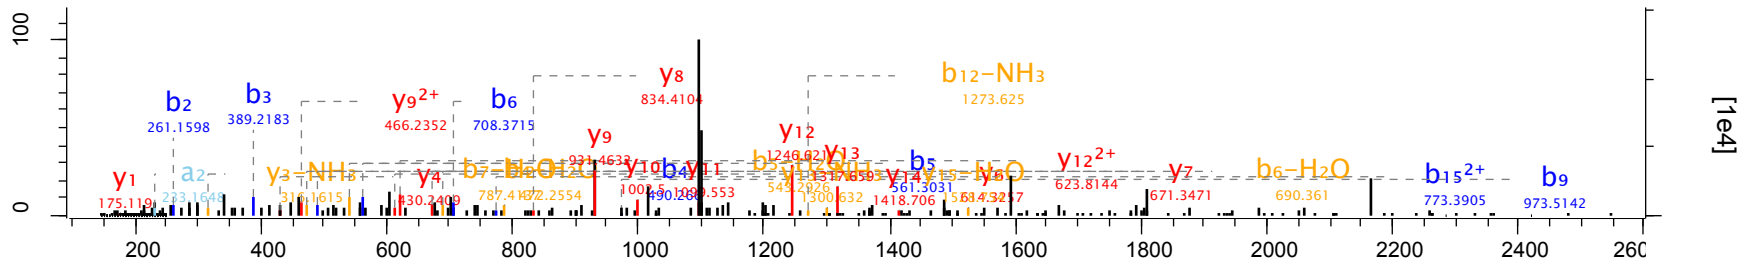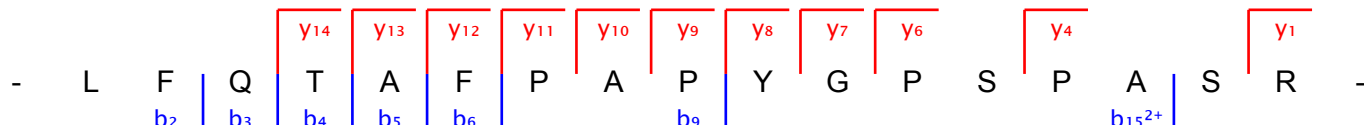

| Raw file                         | Scan  | Method   | Score  | m/z    | Gene names |
|----------------------------------|-------|----------|--------|--------|------------|
| 20150226_Hela_Top_opt_A3_01_1595 | 54625 | TOF; CID | 105.03 | 512.96 | TOLLIP     |

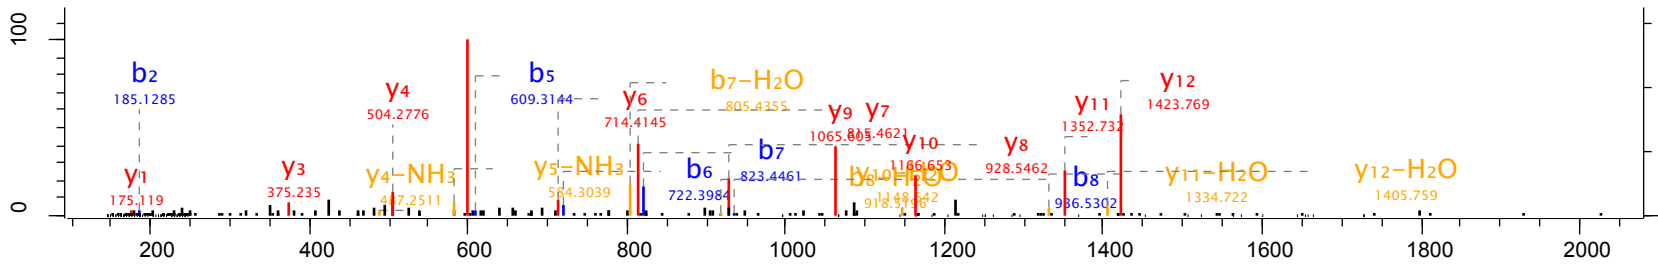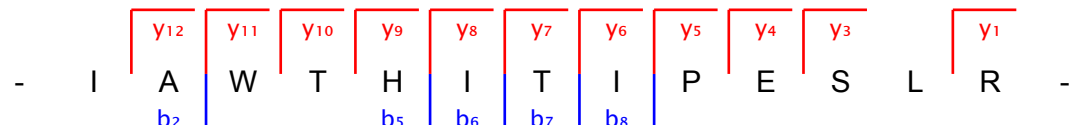

[1e4]



| Raw file                         | Scan  | Method   | Score | m/z    | Gene names |
|----------------------------------|-------|----------|-------|--------|------------|
| 20150226_Hela_Top_opt_A3_01_1595 | 54874 | TOF; CID | 69.63 | 480.26 | BNIP2      |

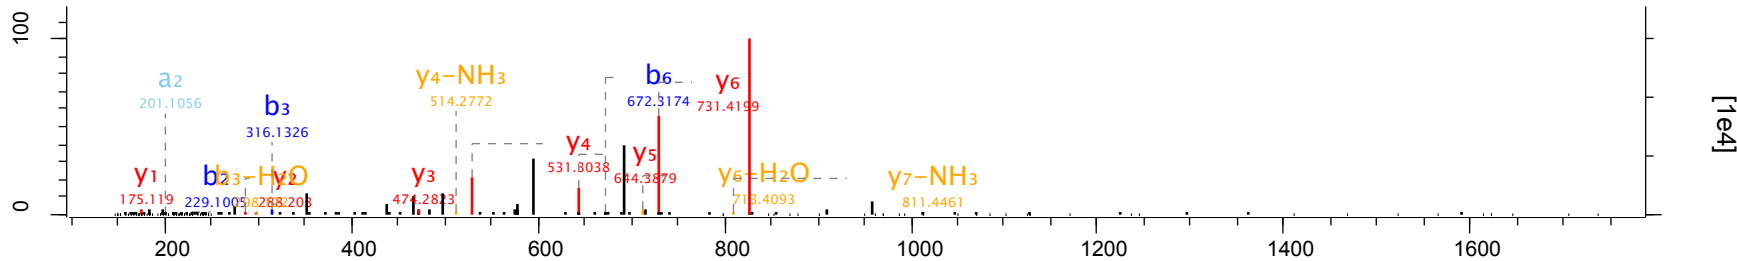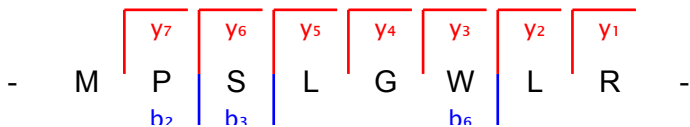

Raw file

20150226\_Hela\_Top\_opt\_A3\_01\_1595

Scan

54985

Method

TOF; CID

Score

50.04

m/z

675.35

Gene names

FZD6

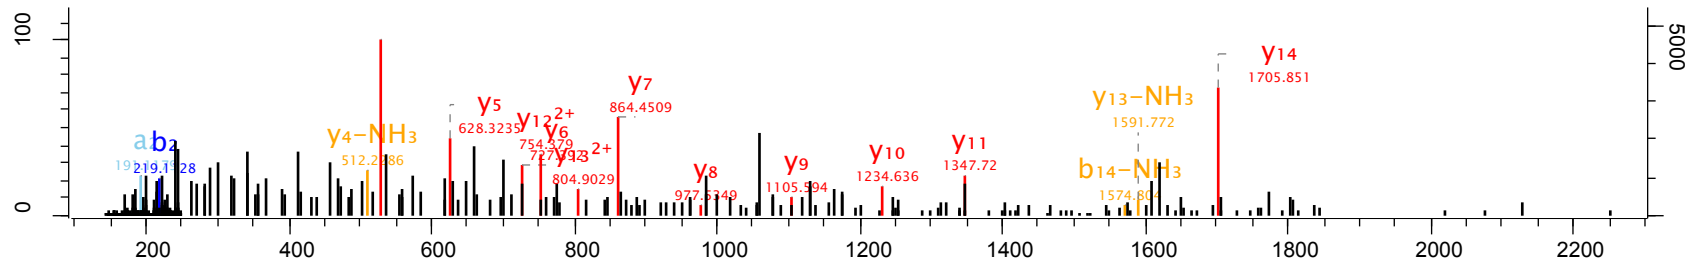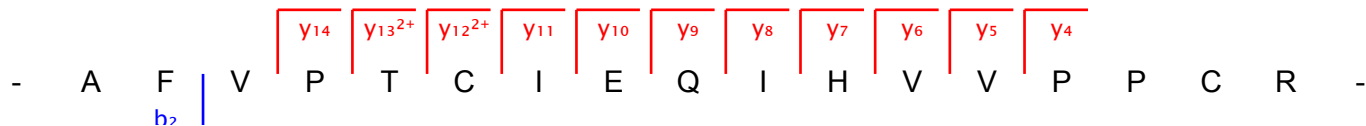

| Raw file                         | Scan  | Method   | Score  | m/z     | Gene names |
|----------------------------------|-------|----------|--------|---------|------------|
| 20150226_Hela_Top_opt_A3_01_1595 | 55397 | TOF; CID | 114.24 | 1100.51 | CEBPG      |

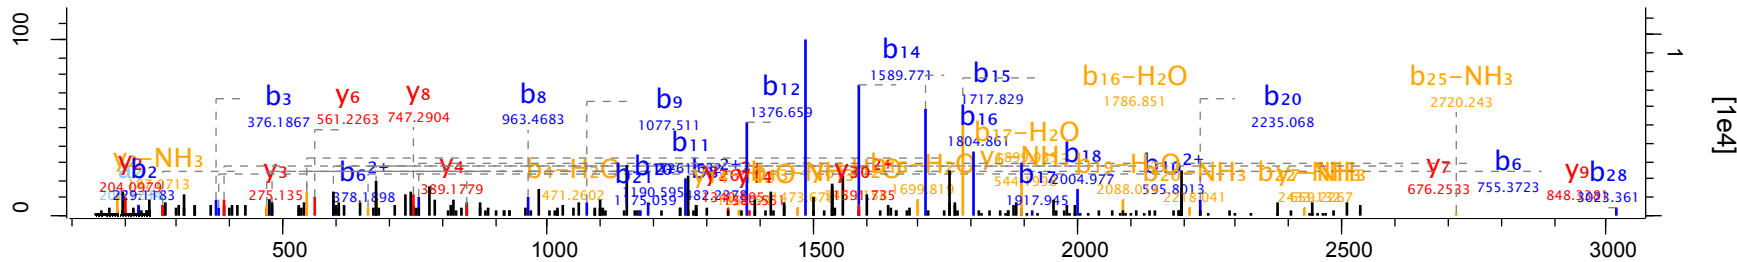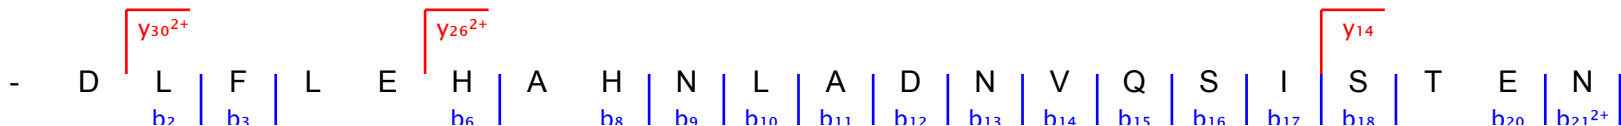

| Raw file                         | Scan  | Method   | Score | m/z    | Gene names |
|----------------------------------|-------|----------|-------|--------|------------|
| 20150226_Hela_Top_opt_A3_01_1595 | 57504 | TOF; CID | 49.08 | 802.41 | TOPBP1     |

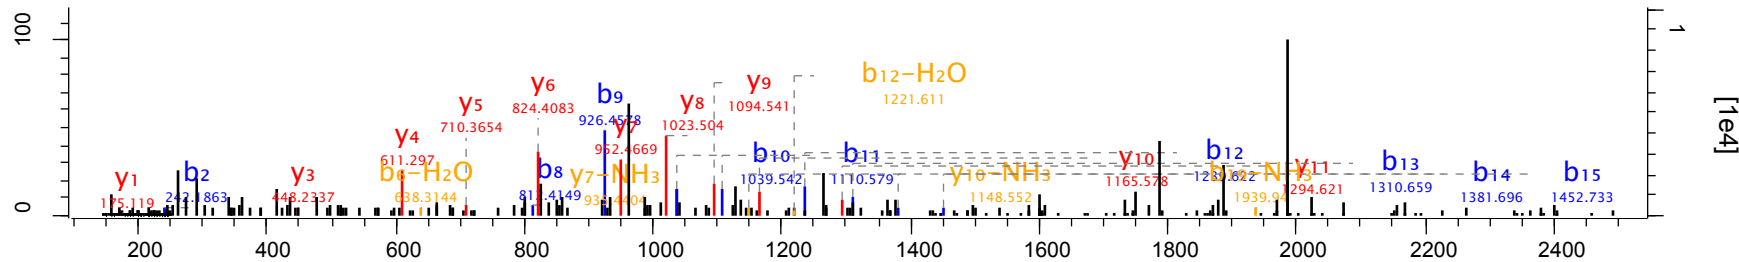

- L K P D D S G V N I A E A A A Q N V Y C L

b<sub>2</sub> | 
 b<sub>8</sub> | 
 b<sub>9</sub> | 
 b<sub>10</sub> | 
 b<sub>11</sub> | 
 y<sub>11</sub> | 
 y<sub>10</sub> | 
 y<sub>9</sub> | 
 y<sub>8</sub> | 
 y<sub>7</sub> | 
 y<sub>6</sub> | 
 y<sub>5</sub> | 
 y<sub>4</sub> | 
 y<sub>3</sub>

| Raw file                         | Scan  | Method   | Score | m/z    | Gene names |
|----------------------------------|-------|----------|-------|--------|------------|
| 20150226_Hela_Top_opt_A3_01_1595 | 58096 | TOF; CID | 58.37 | 862.46 | HELZ2      |

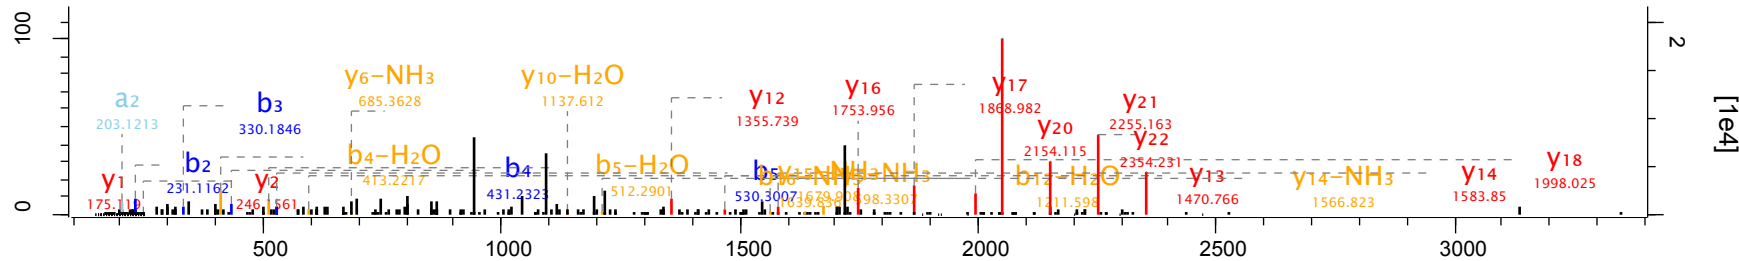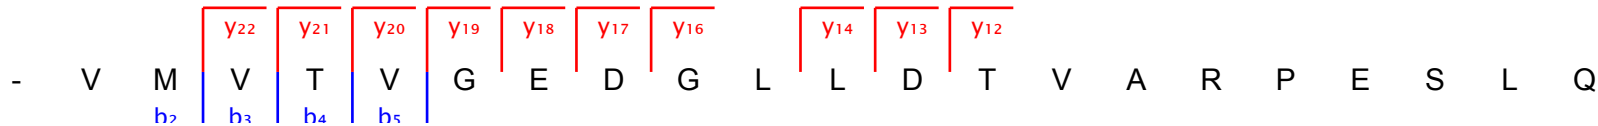

Raw file

20150226\_Hela\_Top\_opt\_A3\_01\_1595

Scan

58194

Method

TOF; CID

Score

71.08

m/z

629.84

Gene names

GTF2A1;HIST1H4F

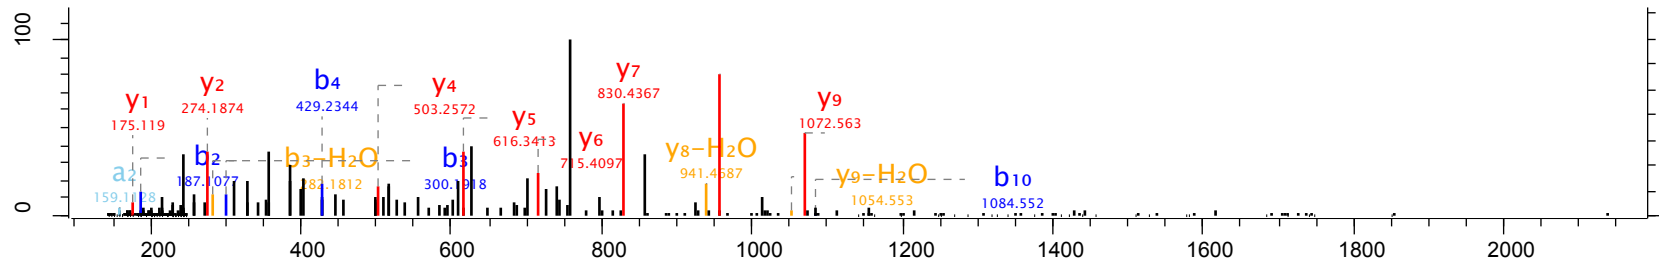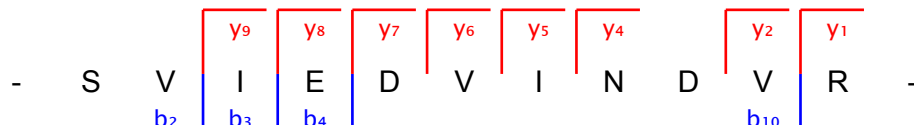

| Raw file                         | Scan  | Method   | Score | m/z    | Gene names |
|----------------------------------|-------|----------|-------|--------|------------|
| 20150226_Hela_Top_opt_A3_01_1595 | 58213 | TOF; CID | 92.54 | 648.88 | ASCC1      |

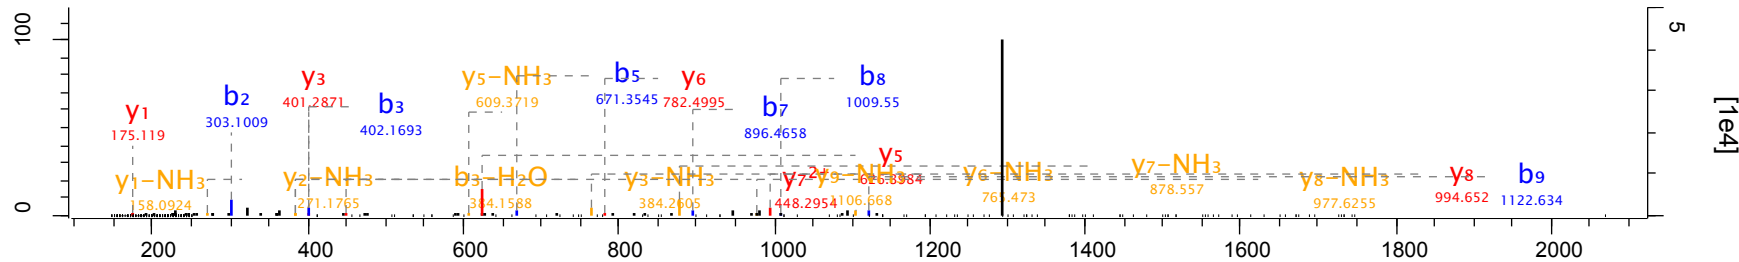

ac

- M E V L R P Q L I R -

h<sub>2</sub> h<sub>3</sub> h<sub>5</sub> h<sub>7</sub> h<sub>8</sub> h<sub>9</sub>

Fragmentation diagram showing peptide sequence M E V L R P Q L I R with fragmentation sites indicated by brackets. The sequence is color-coded: M (black), E (black), V (red), L (red), R (red), P (black), Q (black), L (red), I (black), R (red). Fragmentation sites are labeled with h<sub>2</sub> through h<sub>9</sub> in blue and y<sub>1</sub> through y<sub>8</sub> in red. The y<sub>7</sub> fragment is labeled as y<sub>7</sub><sup>2+</sup>.

| Raw file                         | Scan  | Method   | Score | m/z   | Gene names |
|----------------------------------|-------|----------|-------|-------|------------|
| 20150226_Hela_Top_opt_A3_01_1595 | 58417 | TOF; CID | 53.36 | 724.4 | HPS3       |

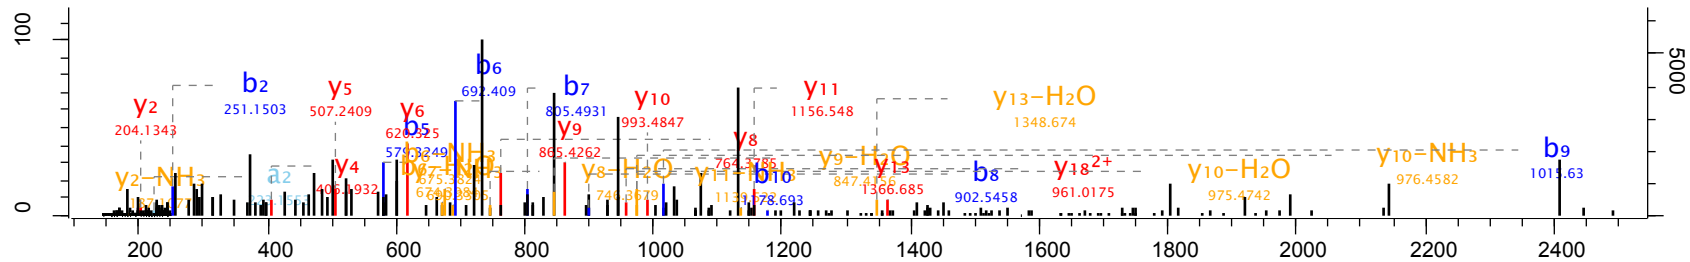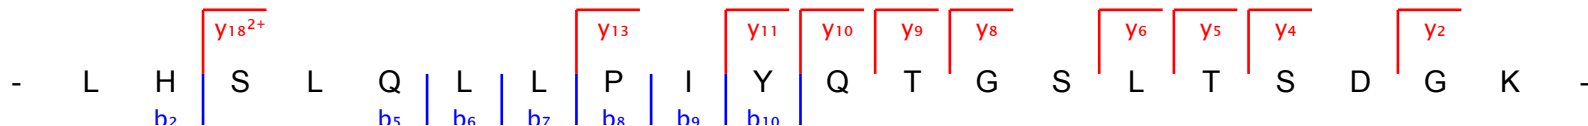



Raw file

20150226\_Hela\_Top\_opt\_A3\_01\_1595

Scan

58755

Method

TOF; CID

Score

76.3

m/z

760.04

Gene names

CNIH4

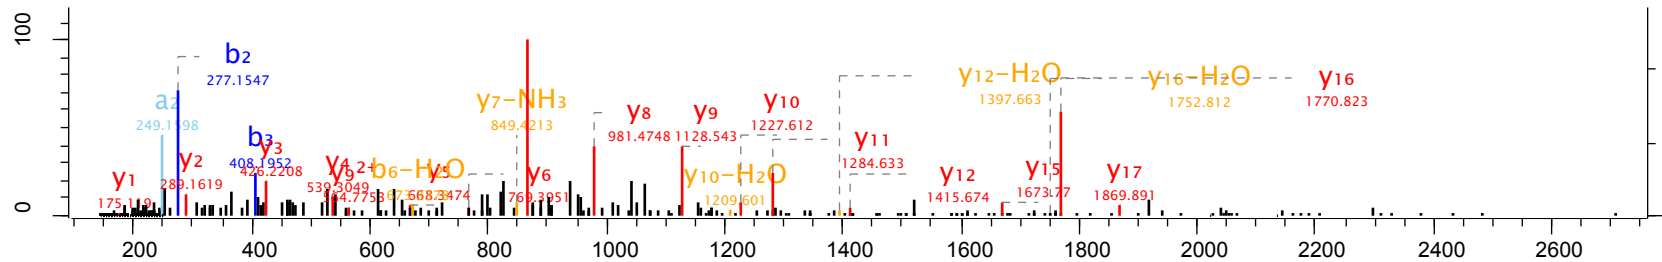

[1e4]

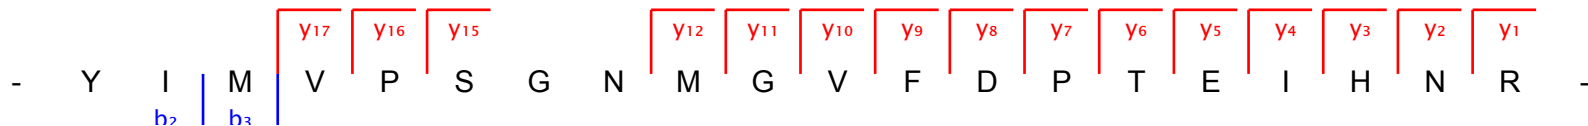

Raw file

20150226\_Hela\_Top\_opt\_A3\_01\_1595

Scan

58872

Method

TOF; CID

Score

139.75

m/z

1233.6

Gene names

PAGR1

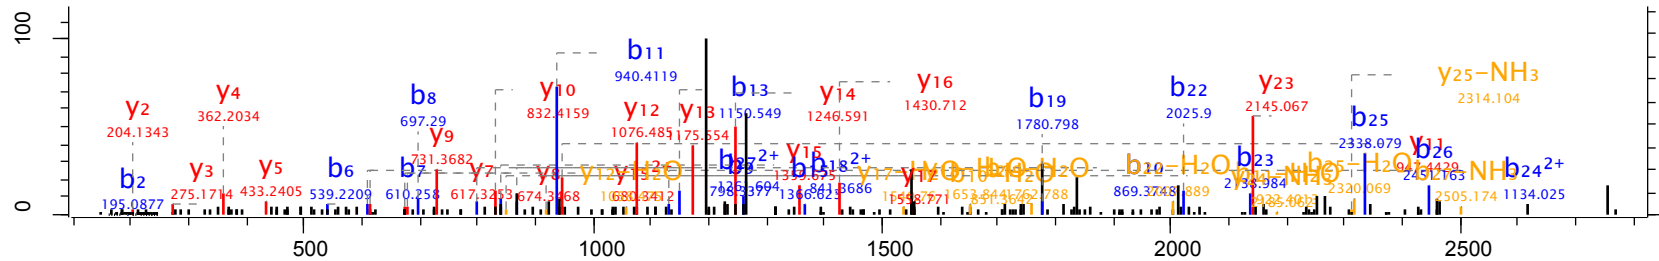

- G H G D T A A S T A A P L S E E G E V T S

          |          |          |          |          |          |          |          |          |          |          |          |          |          |          |

          b<sub>2</sub>          |          b<sub>6</sub>          |          b<sub>7</sub>          |          b<sub>8</sub>          |          b<sub>9</sub>          |          b<sub>10</sub>          |          b<sub>11</sub>          |          b<sub>13</sub>          |          b<sub>15</sub>          |          b<sub>18</sub><sup>2+</sup>          |          b<sub>19</sub>          |

Raw file

20150226\_Hela\_Top\_opt\_A3\_01\_1595

Scan

59374

Method

TOF; CID

Score

80.14

m/z

1103.53

Gene names

SCAMP2

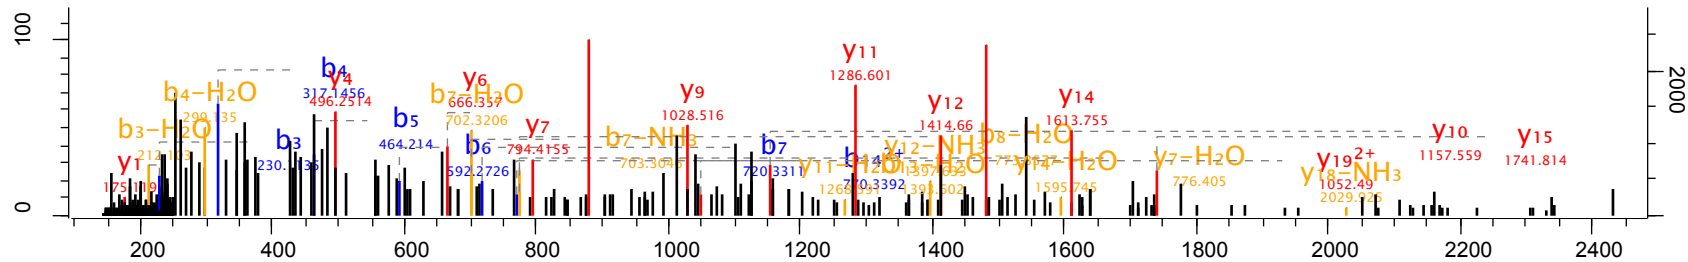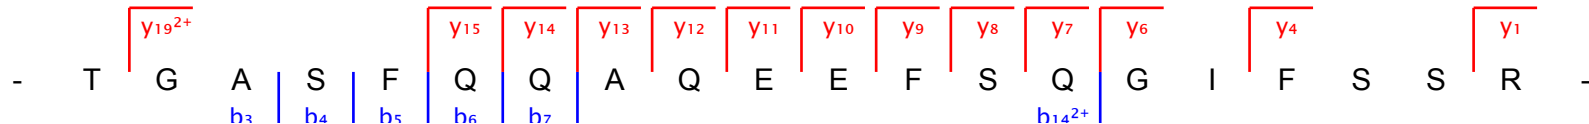

Raw file

20150226\_Hela\_Top\_opt\_A3\_01\_1595

Scan

59722

Method

TOF; CID

Score

117.7

m/z

580.86

Gene names

CNOT6L;CNOT6

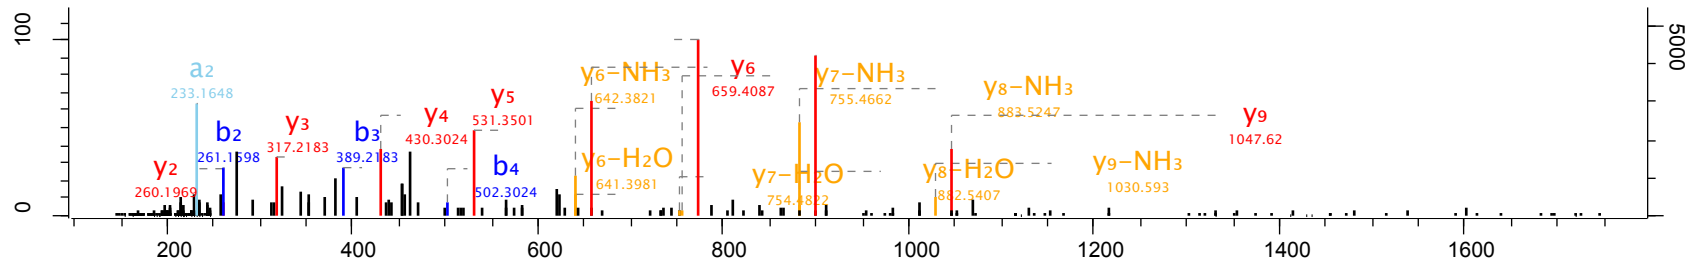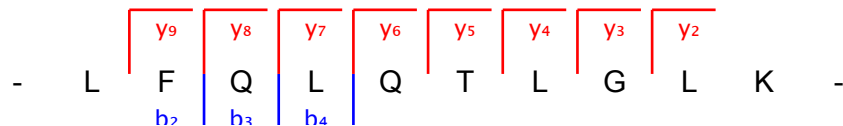

| Raw file                         | Scan  | Method   | Score | m/z   | Gene names |
|----------------------------------|-------|----------|-------|-------|------------|
| 20150226_Hela_Top_opt_A3_01_1595 | 61393 | TOF; CID | 59.23 | 756.4 | TTC5       |

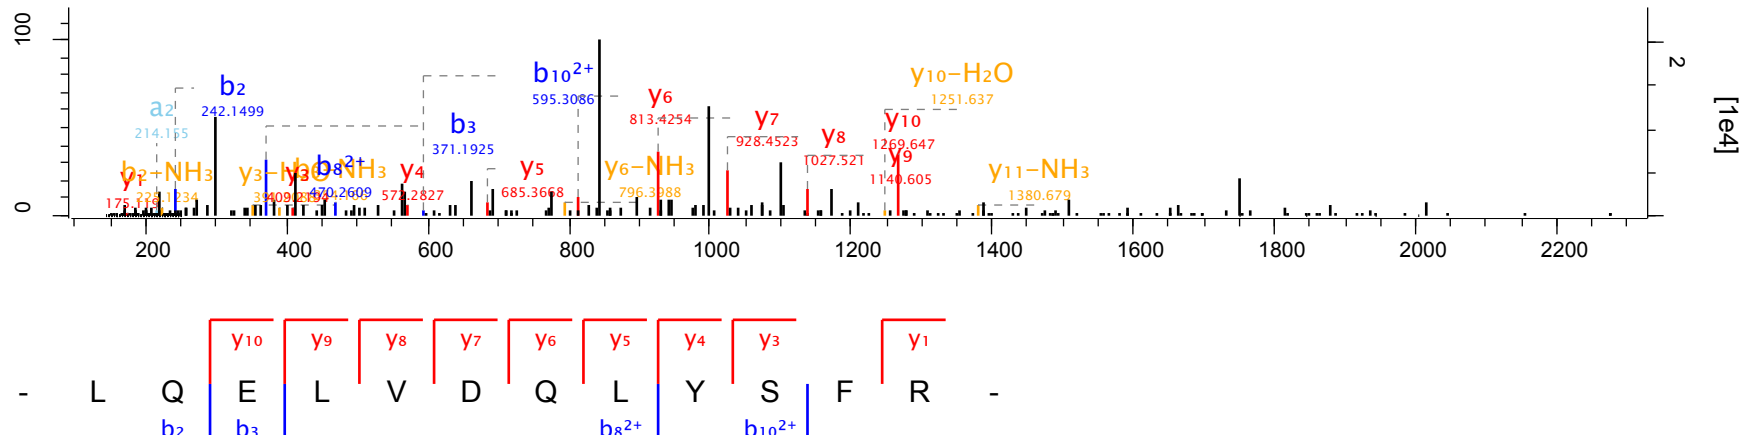

Raw file

20150226\_Hela\_Top\_opt\_A3\_01\_1595

Scan

61550

Method

TOF; CID

Score

111.11

m/z

900.43

Gene names

NUMB

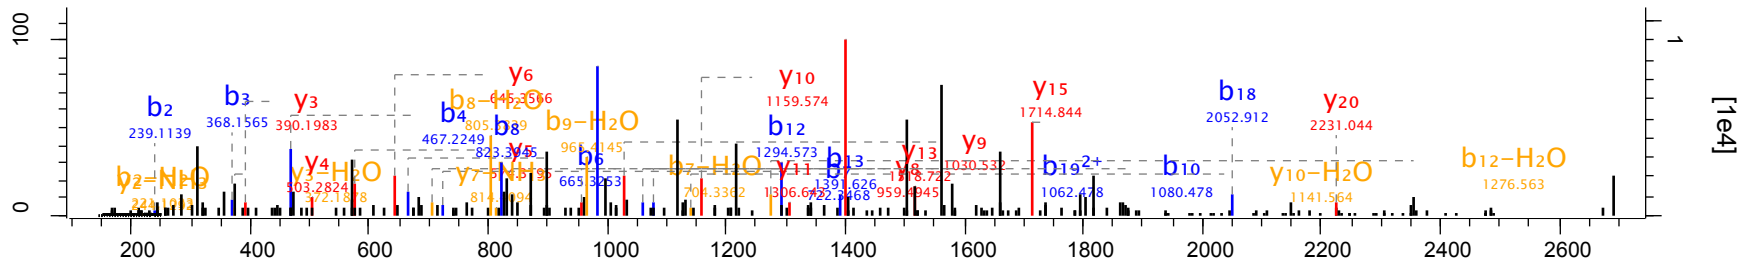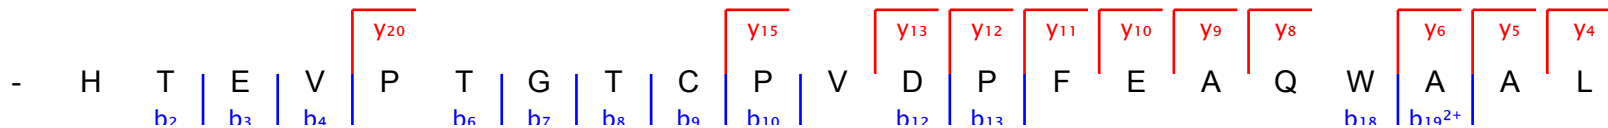

| Raw file                         | Scan  | Method   | Score | m/z    | Gene names |
|----------------------------------|-------|----------|-------|--------|------------|
| 20150226_Hela_Top_opt_A3_01_1595 | 61822 | TOF; CID | 75.82 | 453.26 | ERCC1      |

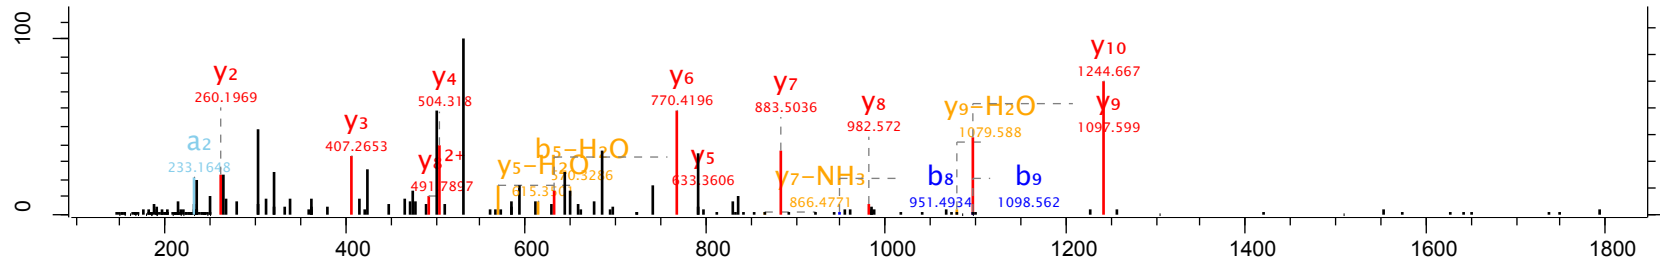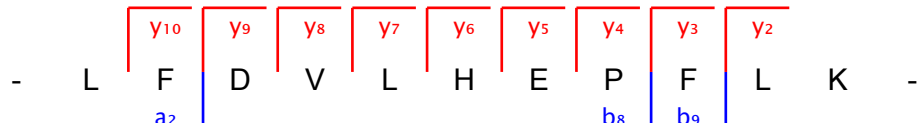

Raw file

20150226\_Hela\_Top\_opt\_A3\_01\_1595

Scan

62434

Method

TOF; CID

Score

83.18

m/z

714.42

Gene names

LOH12CR1

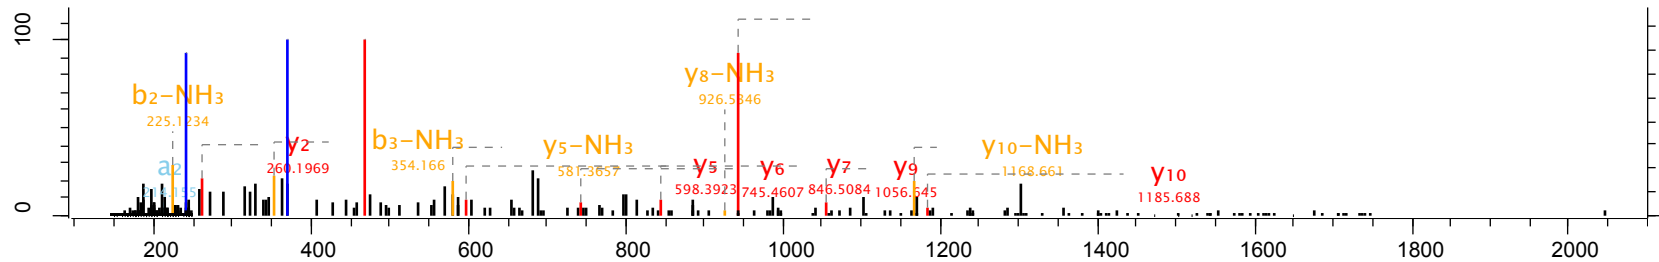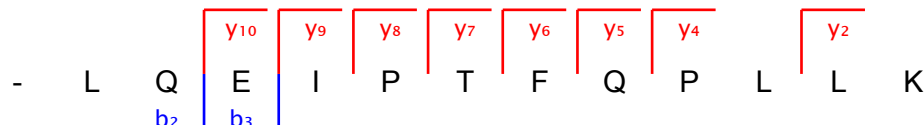



| Raw file                         | Scan  | Method   | Score | m/z    | Gene names |
|----------------------------------|-------|----------|-------|--------|------------|
| 20150226_Hela_Top_opt_A3_01_1595 | 62507 | TOF; CID | 53.45 | 996.51 | PTTG1IP    |

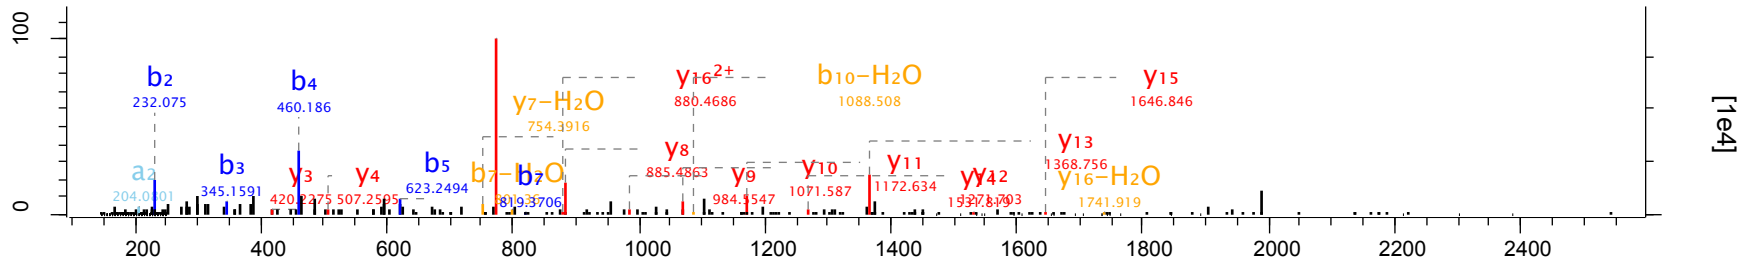

- A C L D Y P V T S V L P P A S L C K -  
 b<sub>2</sub> b<sub>3</sub> b<sub>4</sub> b<sub>5</sub> b<sub>7</sub> y<sub>16</sub><sup>2+</sup> y<sub>15</sub> y<sub>14</sub> y<sub>13</sub> y<sub>12</sub> y<sub>11</sub> y<sub>10</sub> y<sub>9</sub> y<sub>8</sub> y<sub>7</sub> y<sub>4</sub> y<sub>3</sub>

Raw file

20150226\_Hela\_Top\_opt\_A3\_01\_1595

Scan

62703

Method

TOF; CID

Score

67.38

m/z

612.87

Gene names

CYTH2;CYTH1;CYTH3

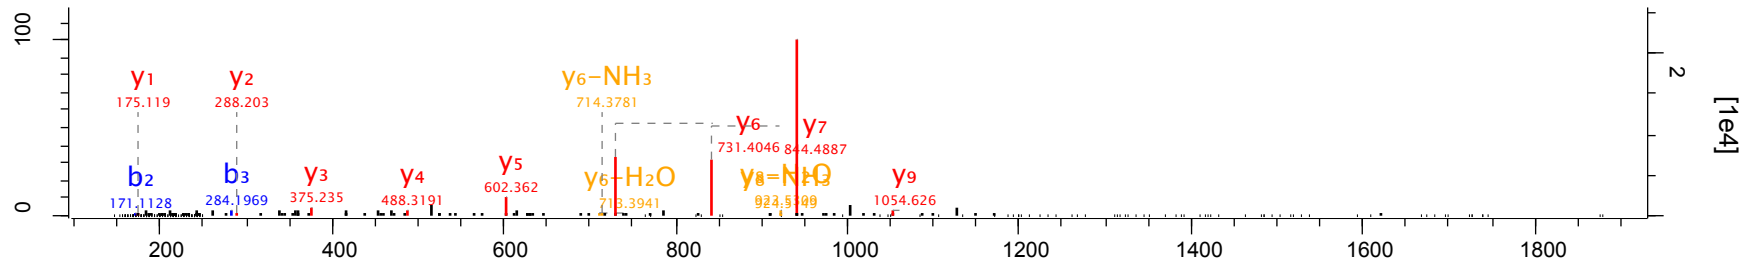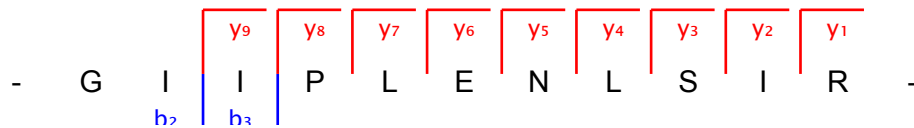

Raw file

20150226\_Hela\_Top\_opt\_A3\_01\_1595

Scan

62730

Method

TOF; CID

Score

85.86

m/z

802.7

Gene names

RABIF

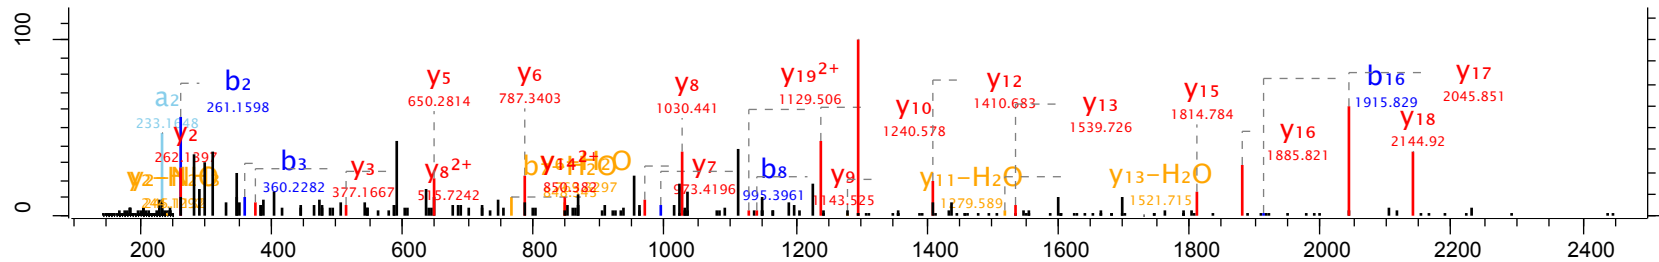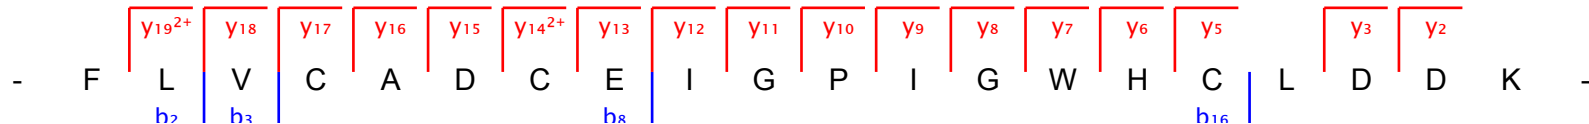

Raw file

20150226\_Hela\_Top\_opt\_A3\_01\_1595

Scan

62945

Method

TOF; CID

Score

74.9

m/z

956.79

Gene names

SCRN3

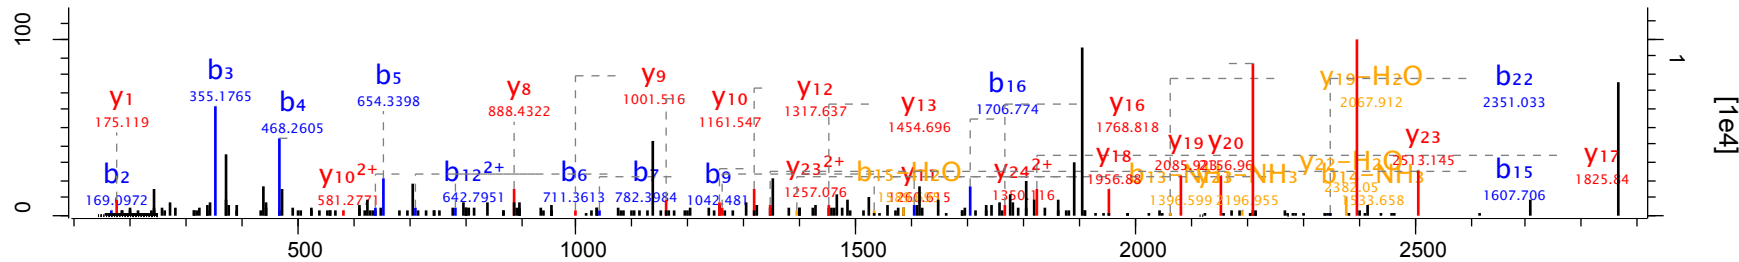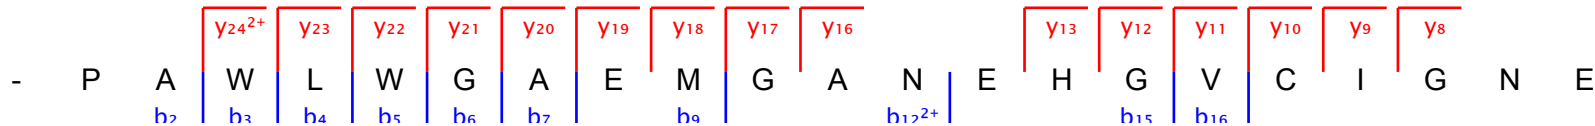

Raw file

20150226\_Hela\_Top\_opt\_A3\_01\_1595

Scan

63771

Method

TOF; CID

Score

107.65

m/z

981.17

Gene names

CPPED1

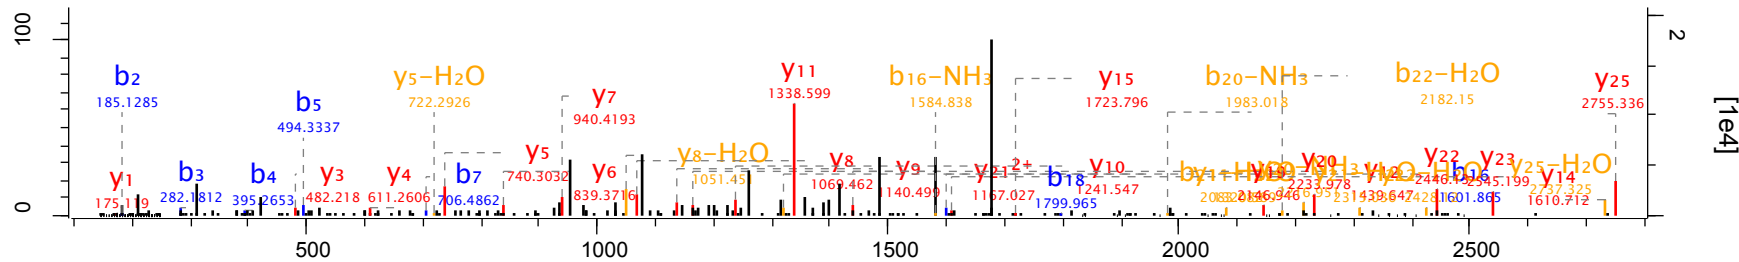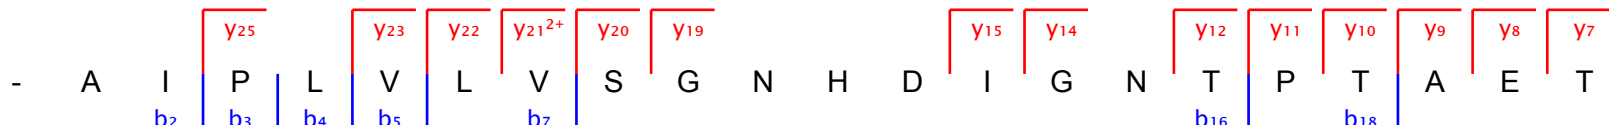

| Raw file                         | Scan  | Method   | Score | m/z    | Gene names |
|----------------------------------|-------|----------|-------|--------|------------|
| 20150226_Hela_Top_opt_A3_01_1595 | 63942 | TOF; CID | 66.14 | 664.84 | SLC39A8    |

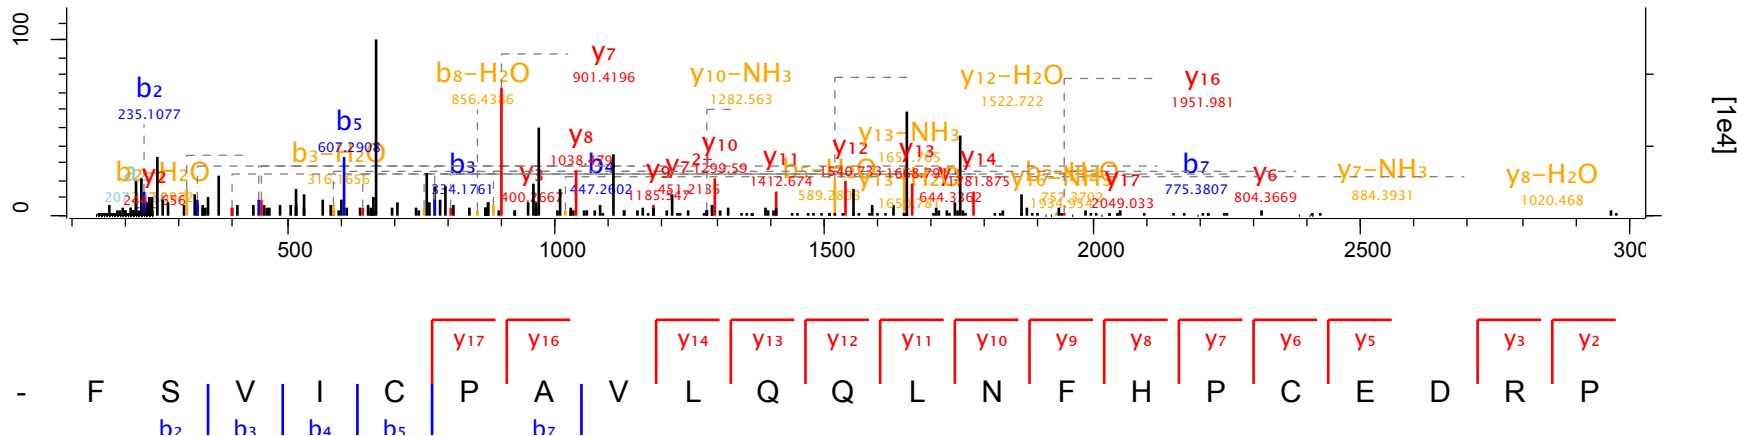

| Raw file                         | Scan  | Method   | Score | m/z    | Gene names |
|----------------------------------|-------|----------|-------|--------|------------|
| 20150226_Hela_Top_opt_A3_01_1595 | 64050 | TOF; CID | 51.13 | 705.87 | SMG7       |

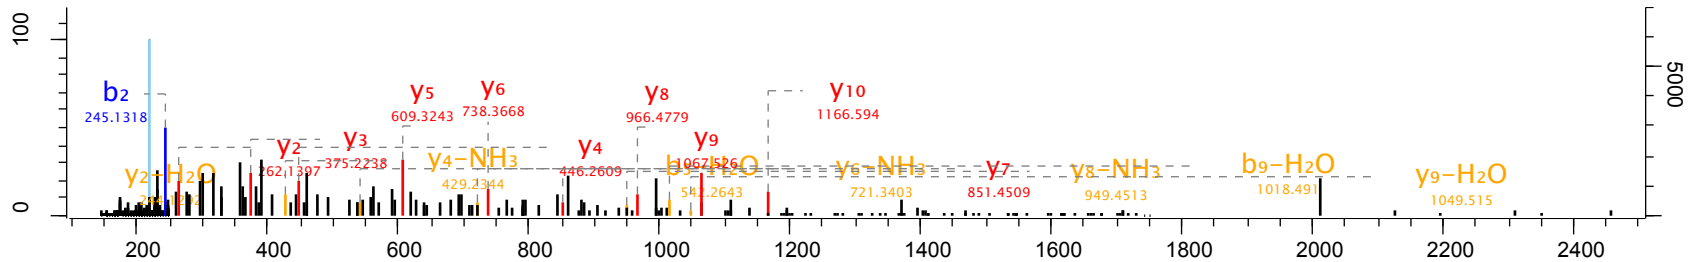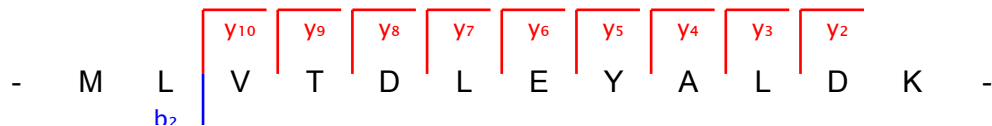

| Raw file                         | Scan  | Method   | Score | m/z    | Gene names |
|----------------------------------|-------|----------|-------|--------|------------|
| 20150226_Hela_Top_opt_A3_01_1595 | 64345 | TOF; CID | 96.49 | 478.28 | RAB34      |

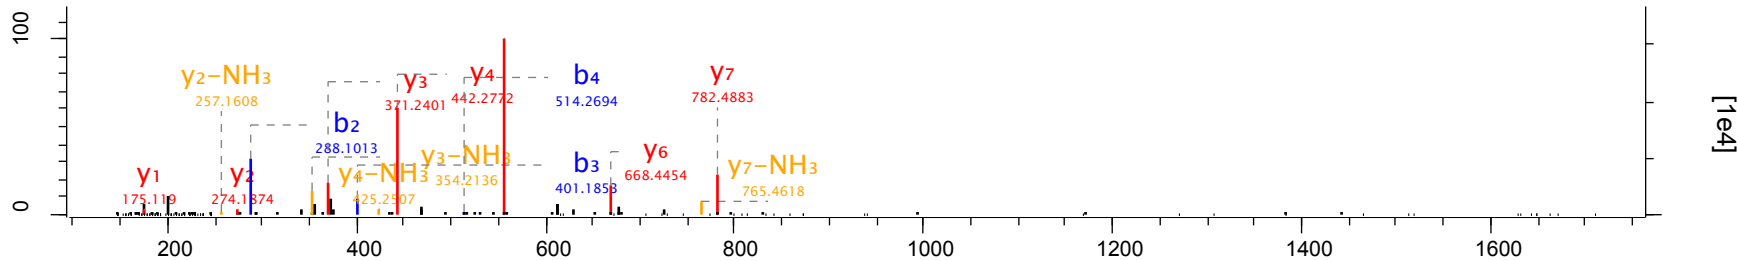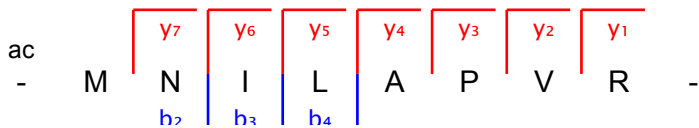



Raw file

20150226\_Hela\_Top\_opt\_A3\_01\_1595

Scan

65261

Method

TOF; CID

Score

45.65

m/z

750.36

Gene names

APOBEC3C

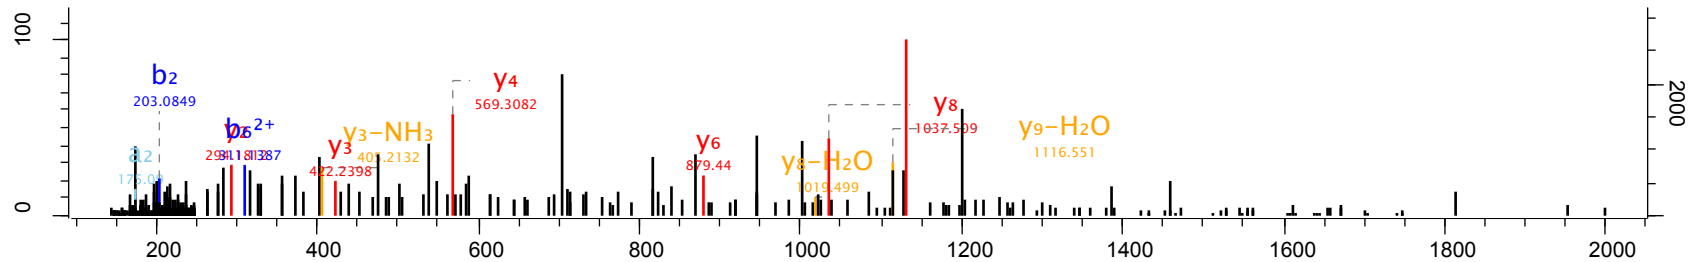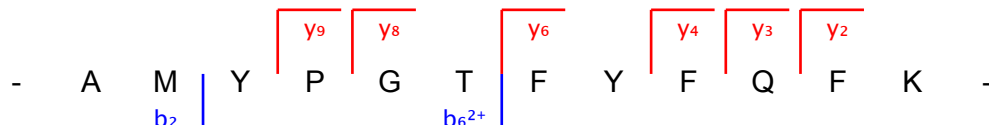

Raw file

20150226\_Hela\_Top\_opt\_A3\_01\_1595

Scan

66609

Method

TOF; CID

Score

83.44

m/z

1028.51

Gene names

FOXRED1

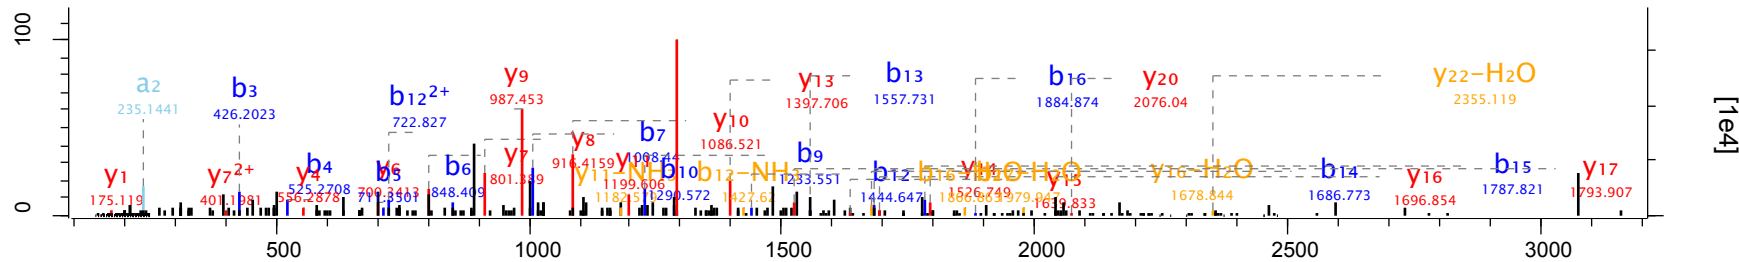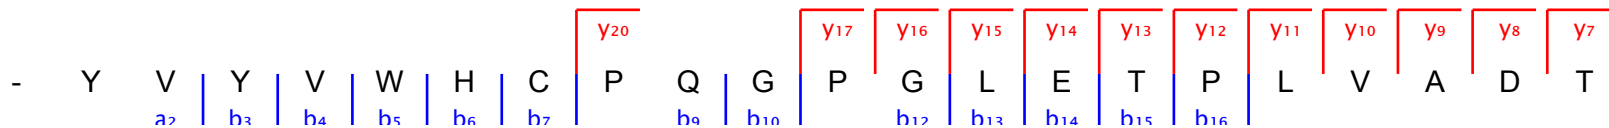

| Raw file                         | Scan  | Method   | Score | m/z    | Gene names |
|----------------------------------|-------|----------|-------|--------|------------|
| 20150226_Hela_Top_opt_A3_01_1595 | 66738 | TOF; CID | 92.19 | 705.91 | POMGNT2    |

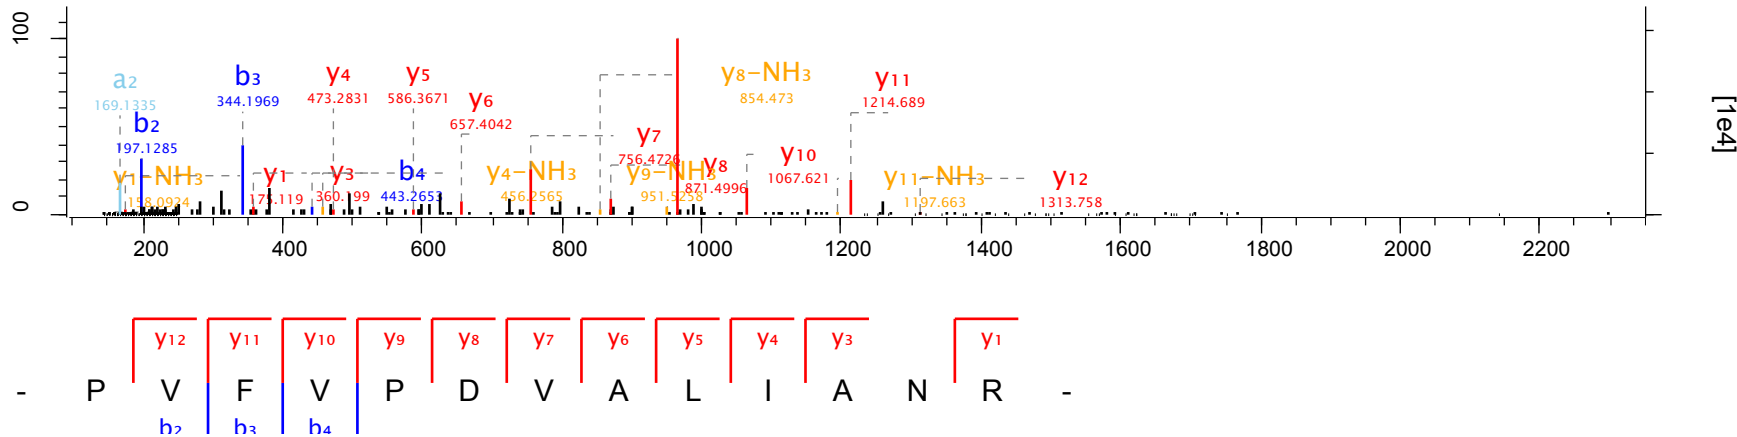

Raw file

20150226\_Hela\_Top\_opt\_A3\_01\_1595

Scan

67039

Method

TOF; CID

Score

73.14

m/z

784.41

Gene names

YIF1A

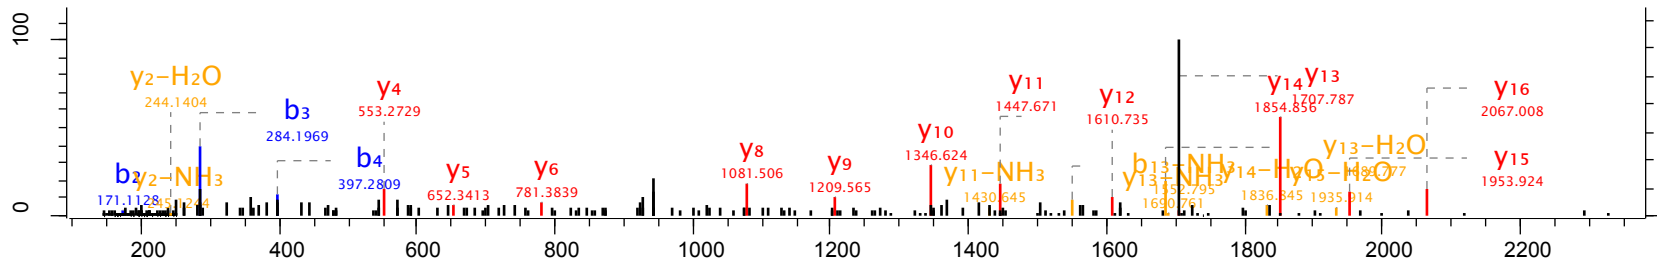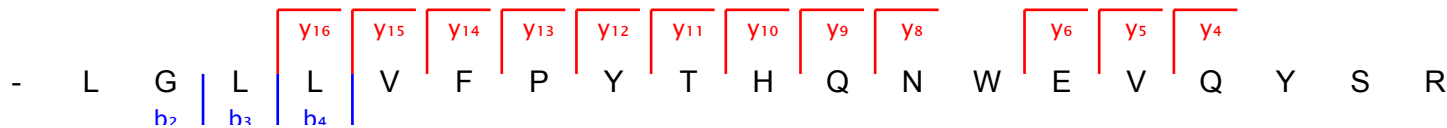

| Raw file                         | Scan  | Method   | Score | m/z    | Gene names |
|----------------------------------|-------|----------|-------|--------|------------|
| 20150226_Hela_Top_opt_A3_01_1595 | 67379 | TOF; CID | 45.68 | 908.43 | EPT1       |

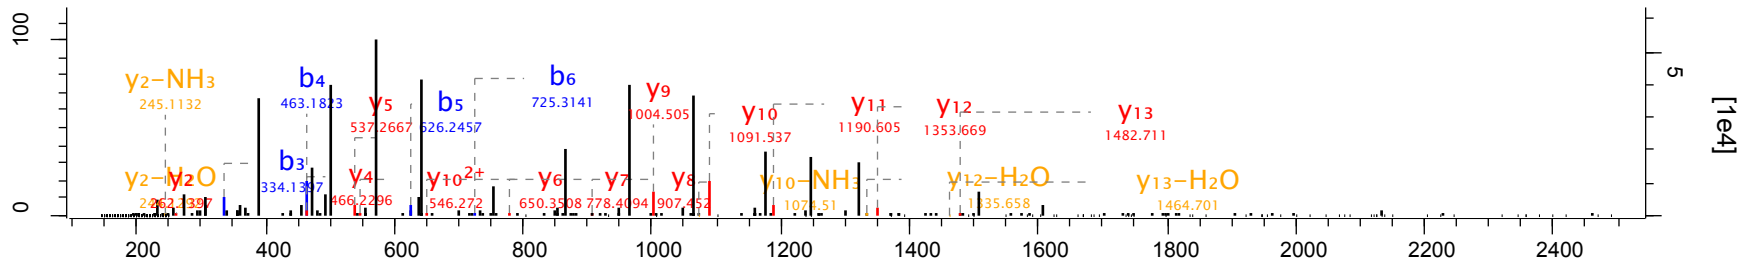

| ac | Sequence: E Y V S P E Q L A G F D K |   |                |                 |                 |                 |                 |                |                |                |                |                |                |   |                |   |   |
|----|-------------------------------------|---|----------------|-----------------|-----------------|-----------------|-----------------|----------------|----------------|----------------|----------------|----------------|----------------|---|----------------|---|---|
| -  | A                                   | G | Y              | E               | Y               | V               | S               | P              | E              | Q              | L              | A              | G              | F | D              | K | - |
|    |                                     |   | b <sub>3</sub> | b <sub>4</sub>  | b <sub>5</sub>  | b <sub>6</sub>  |                 |                |                |                |                |                |                |   |                |   |   |
|    |                                     |   |                | y <sub>13</sub> | y <sub>12</sub> | y <sub>11</sub> | y <sub>10</sub> | y <sub>9</sub> | y <sub>8</sub> | y <sub>7</sub> | y <sub>6</sub> | y <sub>5</sub> | y <sub>4</sub> |   | y <sub>2</sub> |   |   |

| Raw file                         | Scan  | Method   | Score | m/z    | Gene names |
|----------------------------------|-------|----------|-------|--------|------------|
| 20150226_Hela_Top_opt_A3_01_1595 | 67839 | TOF; CID | 77.18 | 681.38 | MRPS21     |

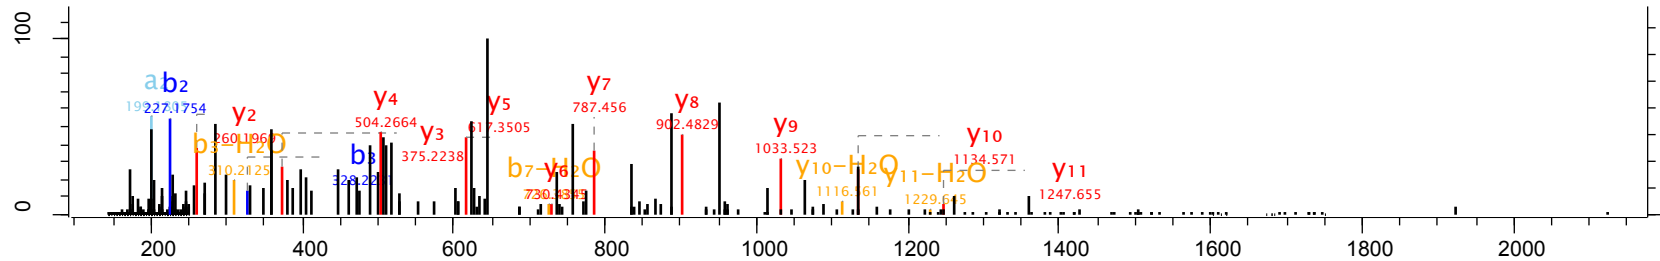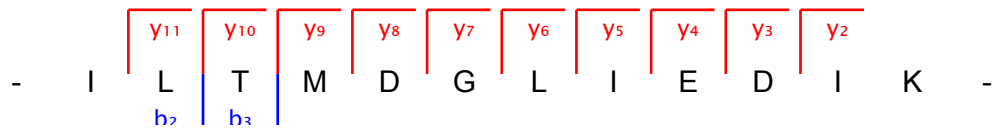

Raw file

Scan

Method

Score

m/z

Gene names

20150226\_Hela\_Top\_opt\_A3\_01\_1595

68700

TOF; CID

55.57

1093.57

GORASP1

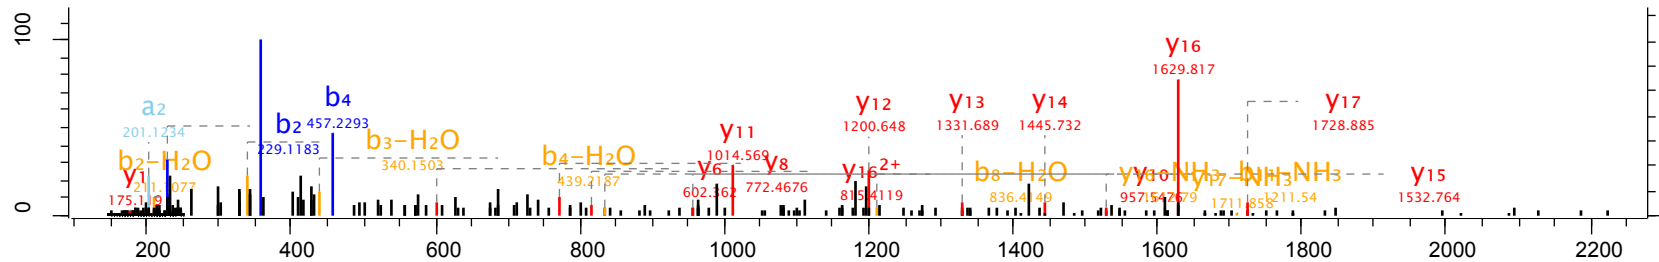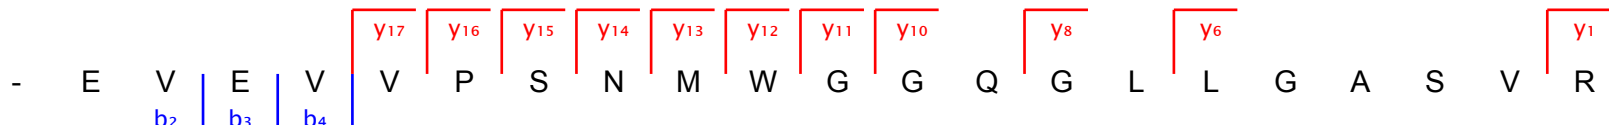

Raw file

20150226\_Hela\_Top\_opt\_A3\_01\_1595

Scan

69445

Method

TOF; CID

Score

70.41

m/z

641.69

Gene names

ASPHD1

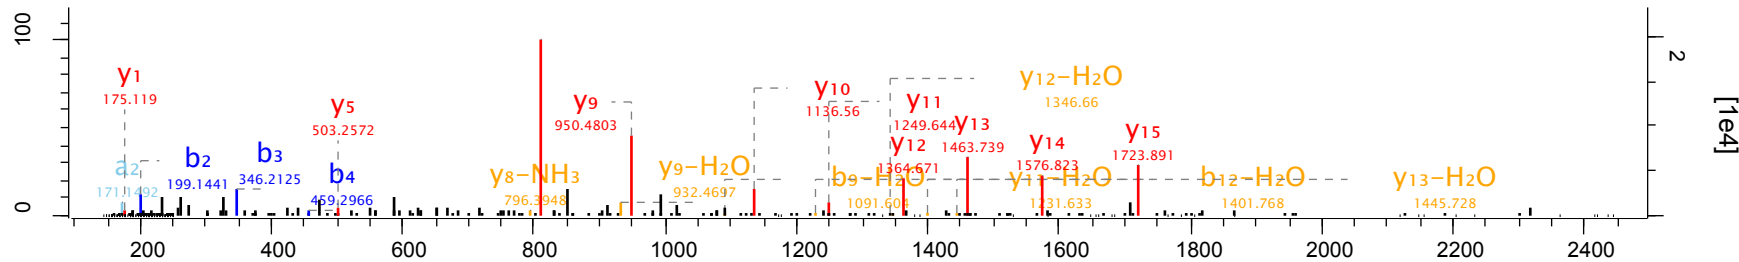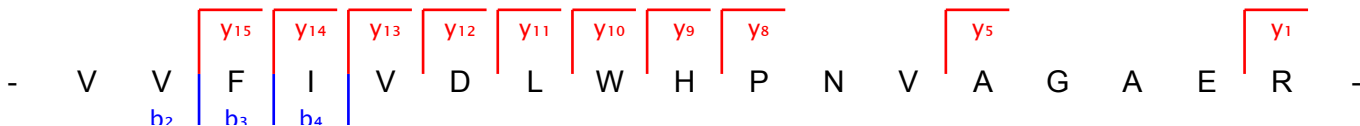



| Raw file                         | Scan  | Method   | Score | m/z     | Gene names |
|----------------------------------|-------|----------|-------|---------|------------|
| 20150226_Hela_Top_opt_A3_01_1595 | 69598 | TOF; CID | 72.57 | 1033.56 | C1orf131   |

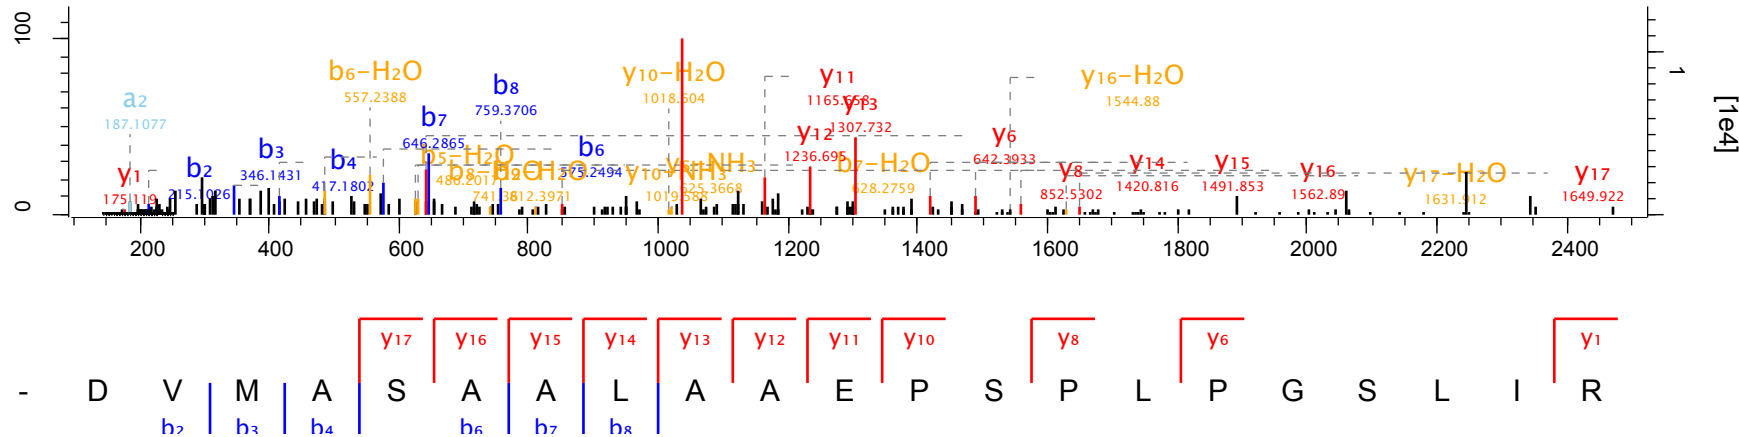

| Raw file                         | Scan  | Method   | Score | m/z    | Gene names |
|----------------------------------|-------|----------|-------|--------|------------|
| 20150226_Hela_Top_opt_A3_01_1595 | 70383 | TOF; CID | 95.48 | 578.86 | FAM213A    |

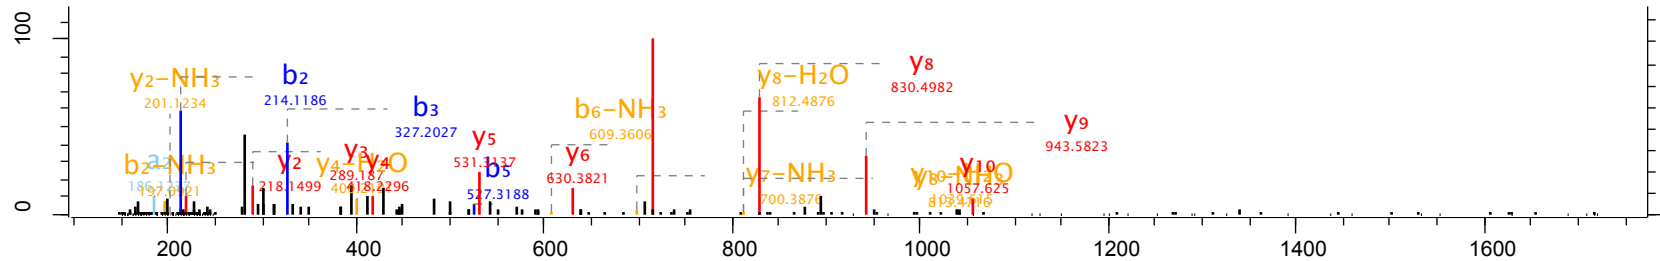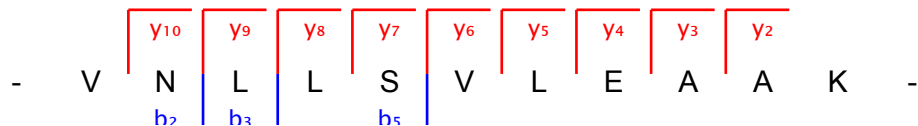



| Raw file                         | Scan  | Method   | Score | m/z    | Gene names |
|----------------------------------|-------|----------|-------|--------|------------|
| 20150226_Hela_Top_opt_A3_01_1595 | 70890 | TOF; CID | 79.15 | 575.82 | MED30      |

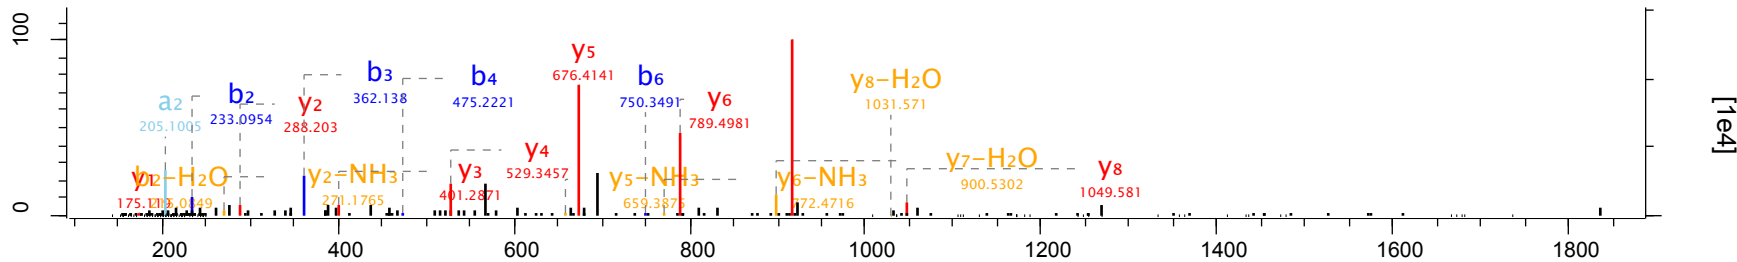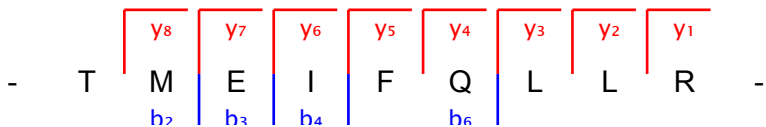

| Raw file                         | Scan  | Method   | Score | m/z    | Gene names |
|----------------------------------|-------|----------|-------|--------|------------|
| 20150226_Hela_Top_opt_A3_01_1595 | 71037 | TOF; CID | 58.08 | 813.43 | TXNIP      |

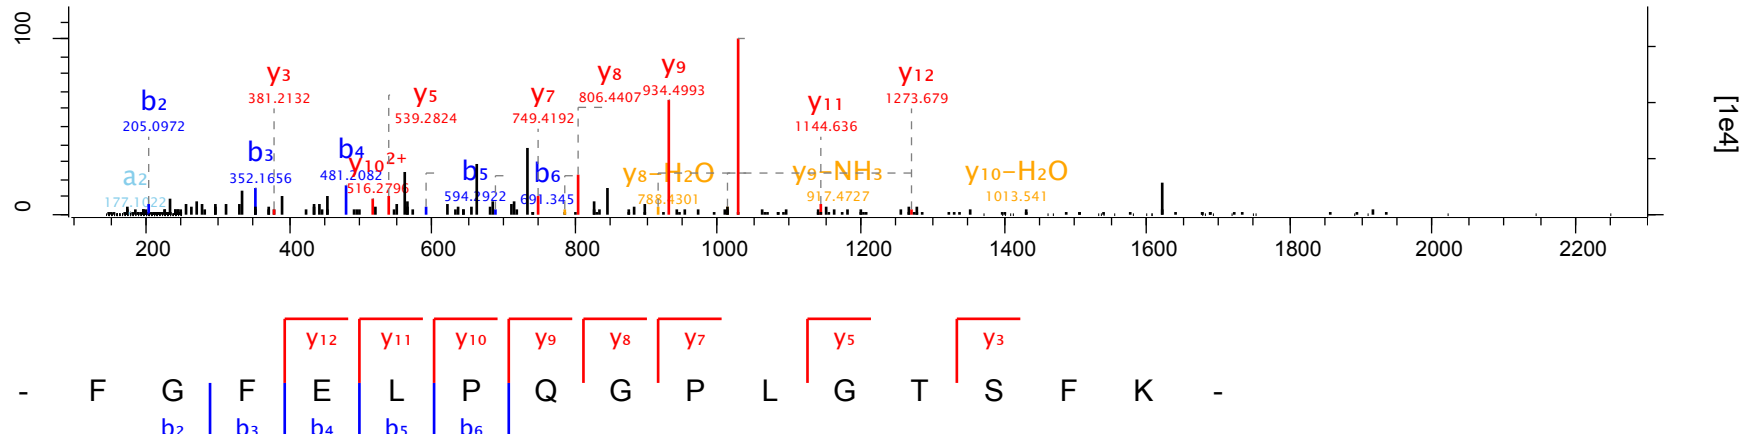

| Raw file                         | Scan  | Method   | Score | m/z    | Gene names |
|----------------------------------|-------|----------|-------|--------|------------|
| 20150226_Hela_Top_opt_A3_01_1595 | 73127 | TOF; CID | 58.08 | 888.43 | CRBN       |

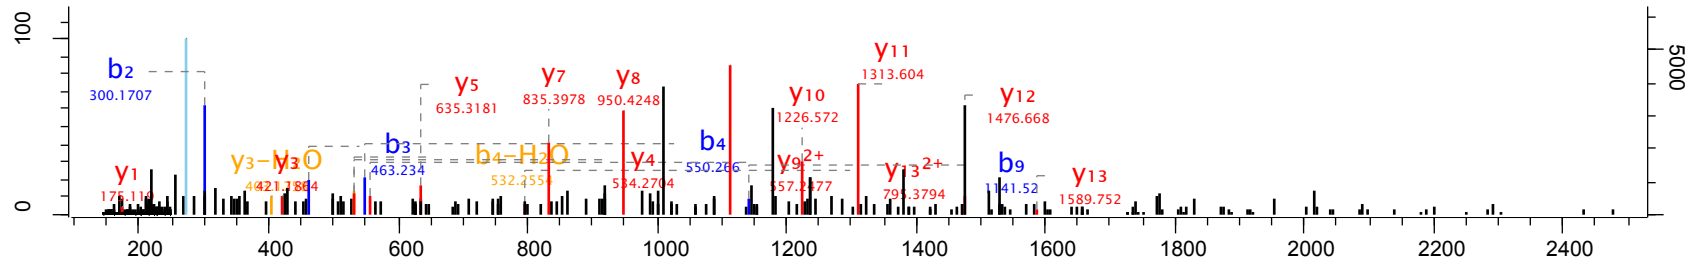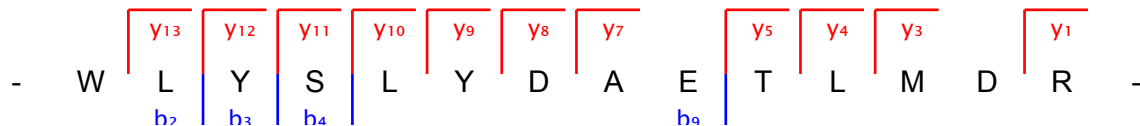

| Raw file                         | Scan  | Method   | Score | m/z     | Gene names |
|----------------------------------|-------|----------|-------|---------|------------|
| 20150226_Hela_Top_opt_A3_01_1595 | 73230 | TOF; CID | 34.37 | 1051.25 | TMEM184B   |

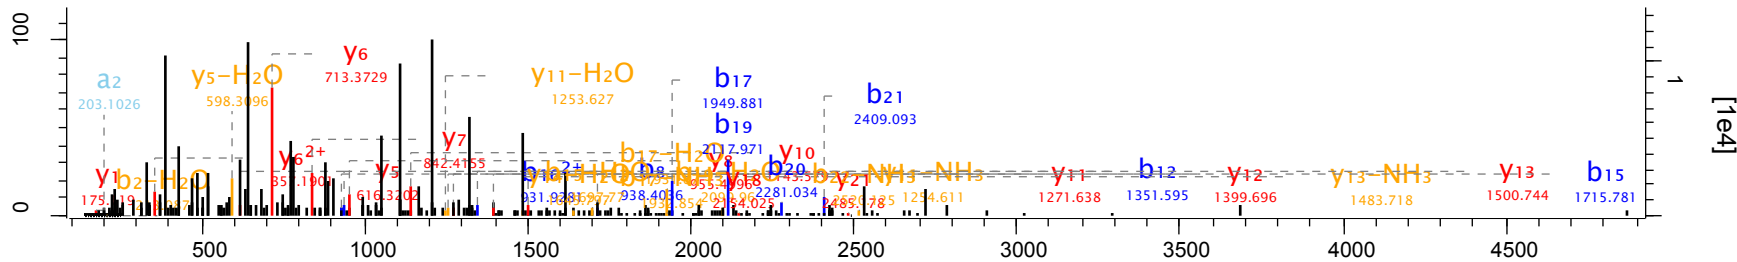

- E T M N P H D I V Q D A I H N F S P A Y Q

a<sub>2</sub> | b<sub>8</sub> | b<sub>12</sub> | b<sub>15</sub> | b<sub>16</sub><sup>2+</sup> | b<sub>17</sub> | b<sub>19</sub> | b<sub>20</sub> | b<sub>21</sub>

y<sub>21</sub> | y<sub>18</sub>

Raw file

20150226\_Hela\_Top\_opt\_A3\_01\_1595

Scan

74196

Method

TOF; CID

Score

116.06

m/z

698.39

Gene names

SCOC

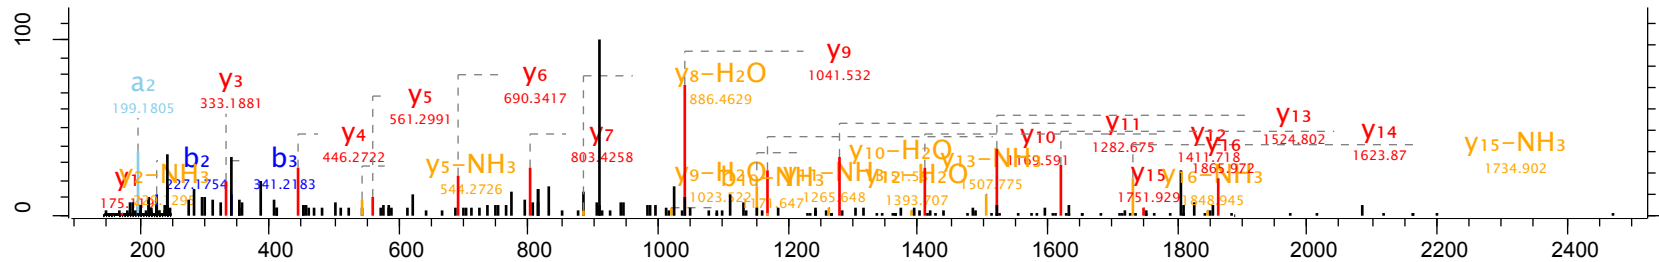

- L I N Q V L E L Q H T L E D L S A R -

b<sub>2</sub> b<sub>3</sub>
y<sub>16</sub> y<sub>15</sub> y<sub>14</sub> y<sub>13</sub> y<sub>12</sub> y<sub>11</sub> y<sub>10</sub> y<sub>9</sub>
y<sub>7</sub> y<sub>6</sub> y<sub>5</sub> y<sub>4</sub> y<sub>3</sub> y<sub>1</sub>



Raw file

20150226\_Hela\_Top\_opt\_A3\_01\_1595

Scan

74593

Method

TOF; CID

Score

67.42

m/z

941.81

Gene names

IL32

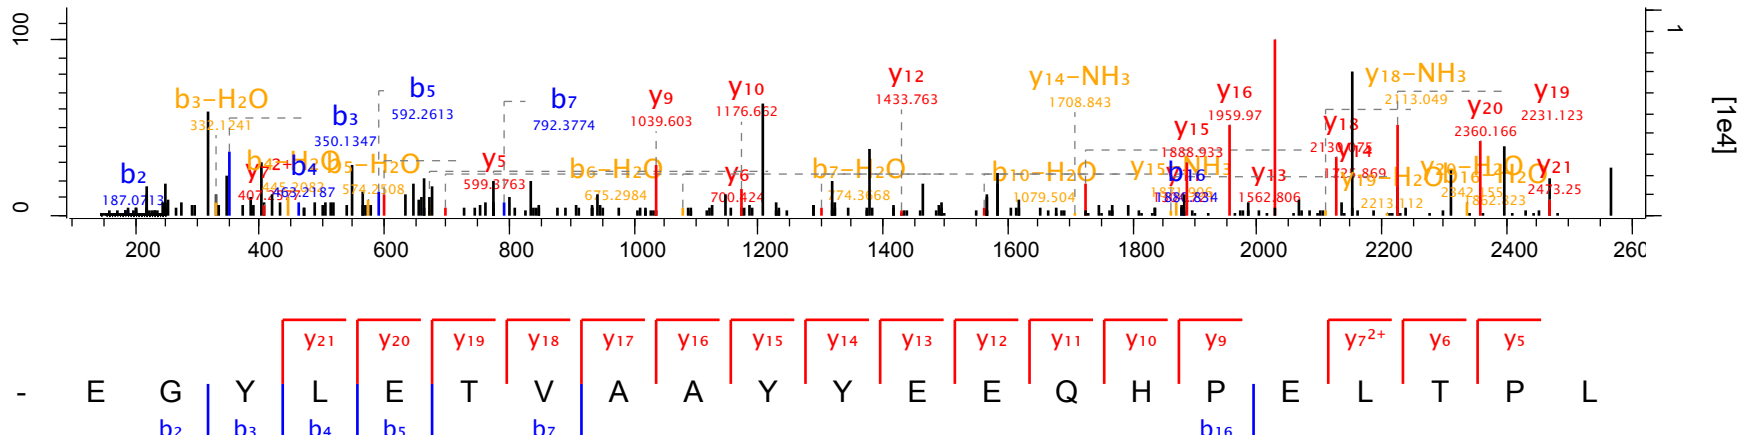

| Raw file                         | Scan  | Method   | Score | m/z    | Gene names |
|----------------------------------|-------|----------|-------|--------|------------|
| 20150226_Hela_Top_opt_A3_01_1595 | 74639 | TOF; CID | 32.5  | 965.96 | PYROXD1    |

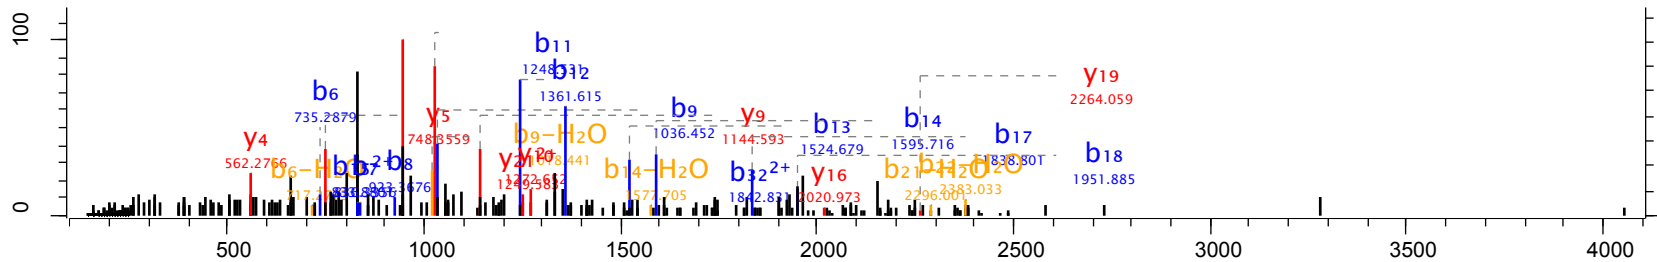

- V D D H M H T S L P D I Y A A G D I C T T

h<sub>6</sub> | h<sub>7</sub> | h<sub>8</sub> | h<sub>9</sub> | h<sub>11</sub> | h<sub>12</sub> | y<sub>21</sub><sup>2+</sup> | h<sub>13</sub> | h<sub>14</sub> | y<sub>19</sub> | h<sub>15</sub><sup>2+</sup> | h<sub>17</sub> | y<sub>16</sub> | h<sub>18</sub>



Raw file

20150226\_Hela\_Top\_opt\_A3\_01\_1595

Scan

75070

Method

TOF; CID

Score

117.03

m/z

927.45

Gene names

GMPR2

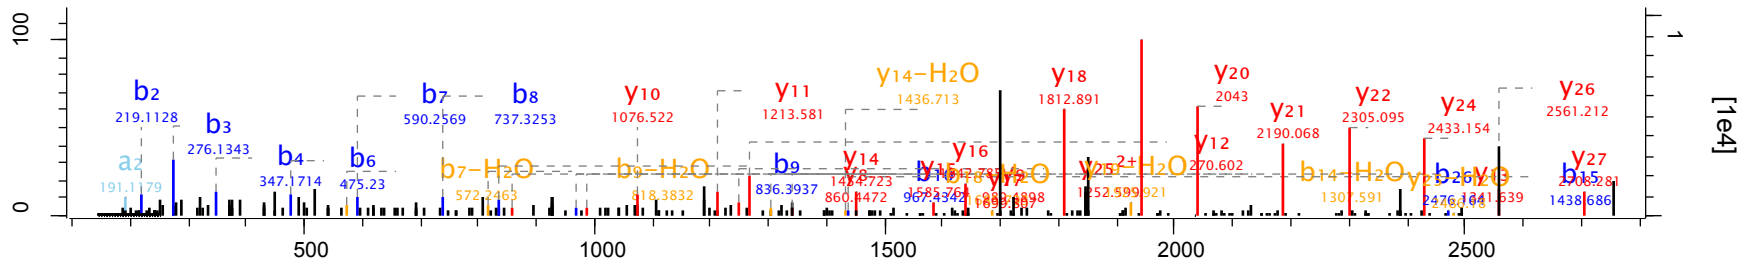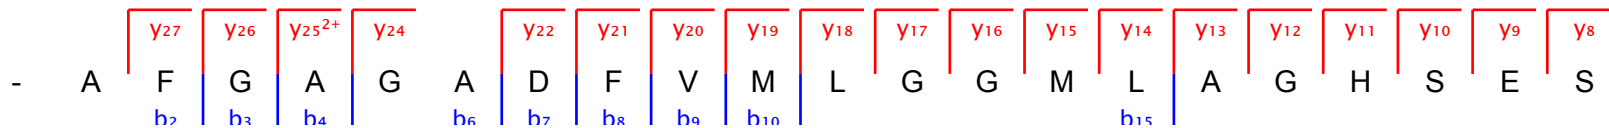

Raw file

20150226\_Hela\_Top\_opt\_A3\_01\_1595

Scan

75226

Method

TOF; CID

Score

86.5

m/z

870.54

Gene names

RHBDD2;WUGSC:H\_RG122E10.2a

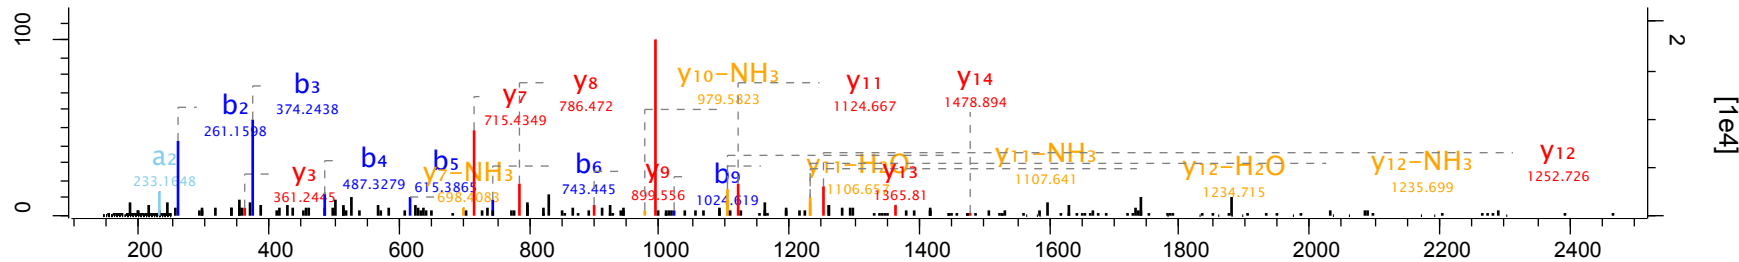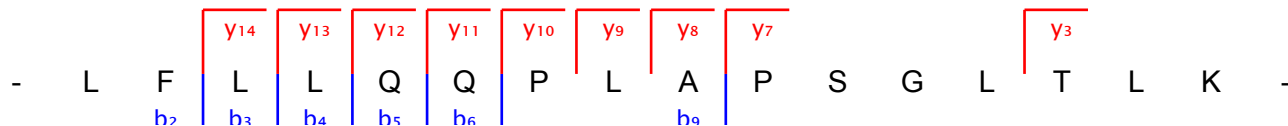

| Raw file                         | Scan  | Method   | Score | m/z     | Gene names |
|----------------------------------|-------|----------|-------|---------|------------|
| 20150226_Hela_Top_opt_A3_01_1595 | 75228 | TOF; CID | 81.84 | 1142.21 | LMBRD2     |

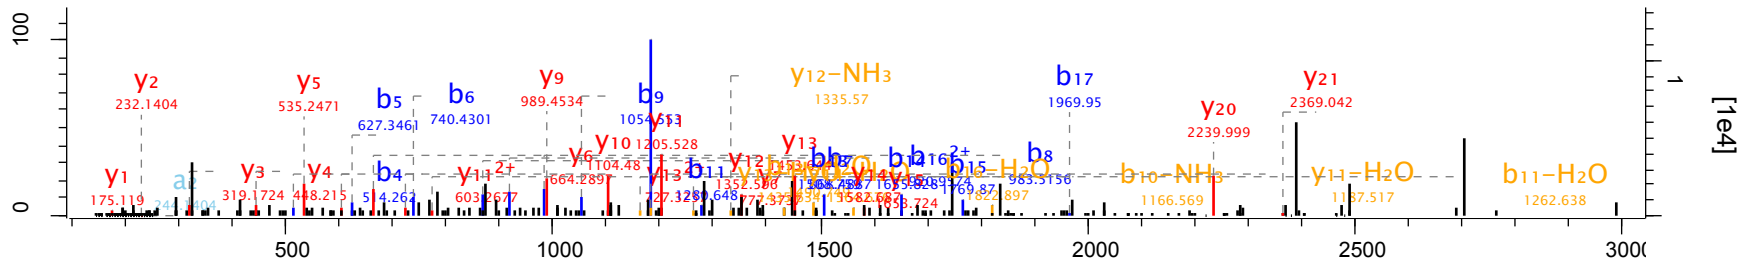

- D R I E L L Q D A E P L D F N A E T F T D

a2 | b4 | b5 | b6 | b7 | b8 | b9 | b10 | b11 | b13 | b14 | b15 | b16<sup>2+</sup> | b17

y21 | y20 | y15 | y14 | y13 | y12 | y11 | y10

Raw file

20150226\_Hela\_Top\_opt\_A3\_01\_1595

Scan

75607

Method

TOF; CID

Score

53.26

m/z

1012.99

Gene names

NAA38

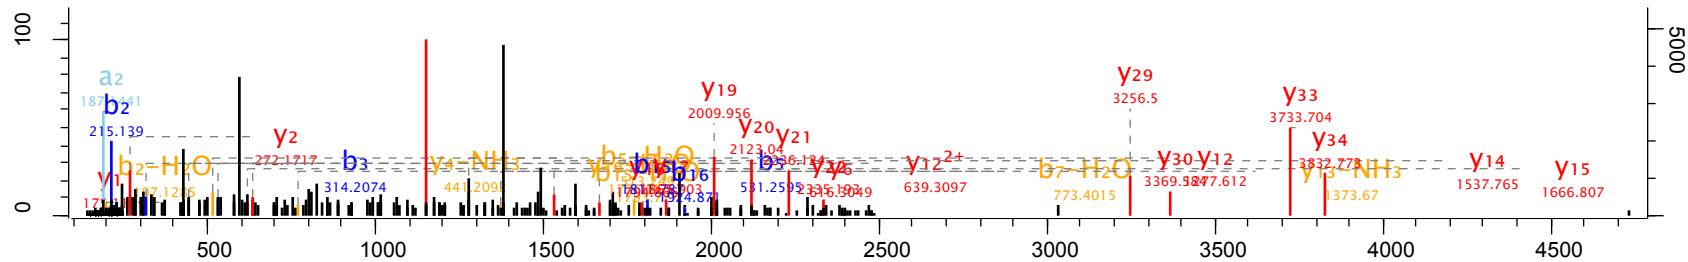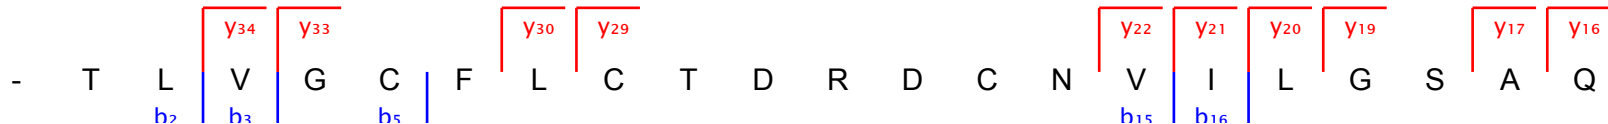

| Raw file                         | Scan  | Method   | Score | m/z   | Gene names |
|----------------------------------|-------|----------|-------|-------|------------|
| 20150226_Hela_Top_opt_A3_01_1595 | 75625 | TOF; CID | 52.52 | 974.5 | ZC3H8      |

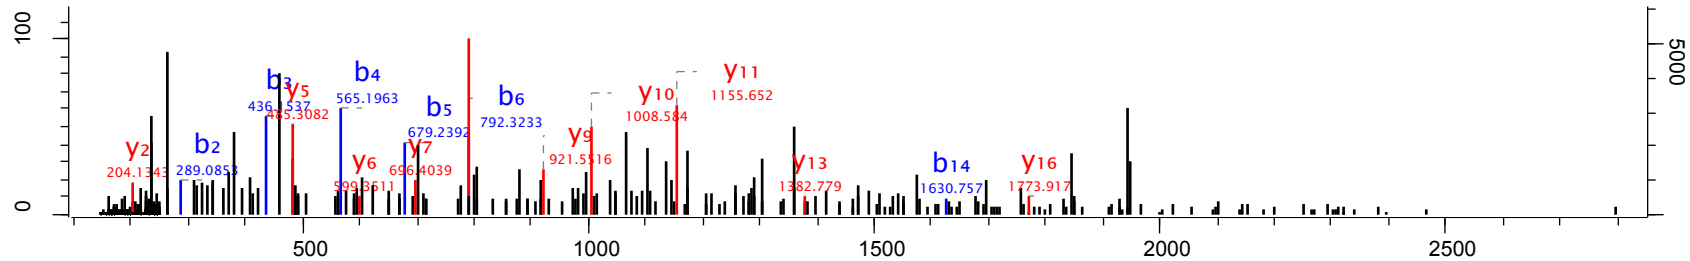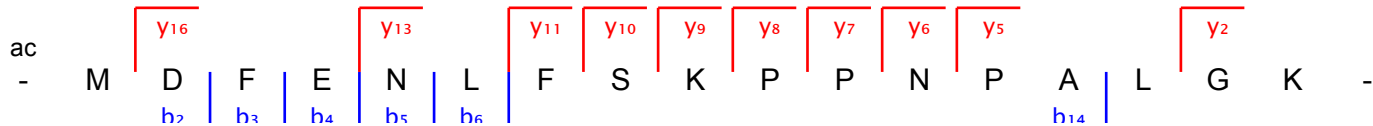



| Raw file                         | Scan  | Method   | Score | m/z    | Gene names  |
|----------------------------------|-------|----------|-------|--------|-------------|
| 20150226_Hela_Top_opt_A3_01_1595 | 75810 | TOF; CID | 53.45 | 747.41 | FMNL2;FMNL3 |

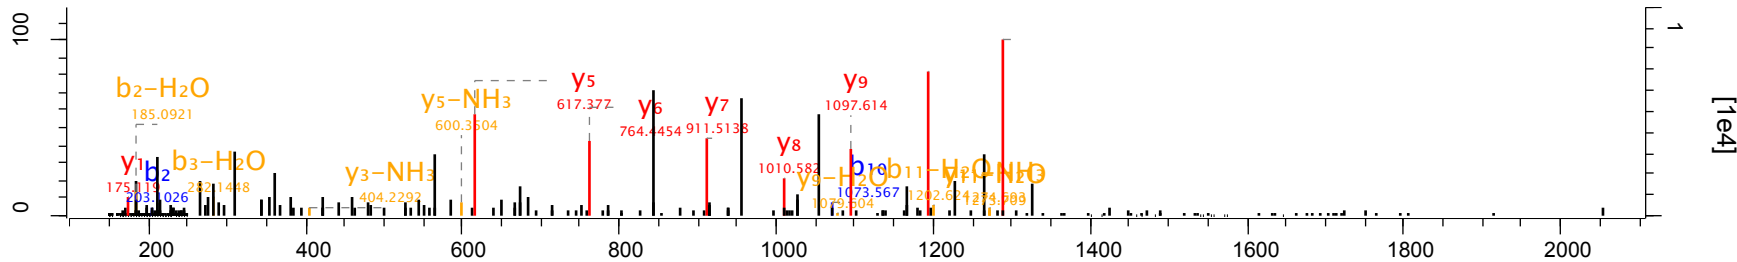

- T T P P S V F F P V F V R -  
 b<sub>2</sub> b<sub>10</sub>

y<sub>11</sub> y<sub>10</sub> y<sub>9</sub> y<sub>8</sub> y<sub>7</sub> y<sub>6</sub> y<sub>5</sub> y<sub>1</sub>

Raw file

20150226\_Hela\_Top\_opt\_A3\_01\_1595

Scan

76337

Method

TOF; CID

Score

94.57

m/z

944.98

Gene names

MRPL51

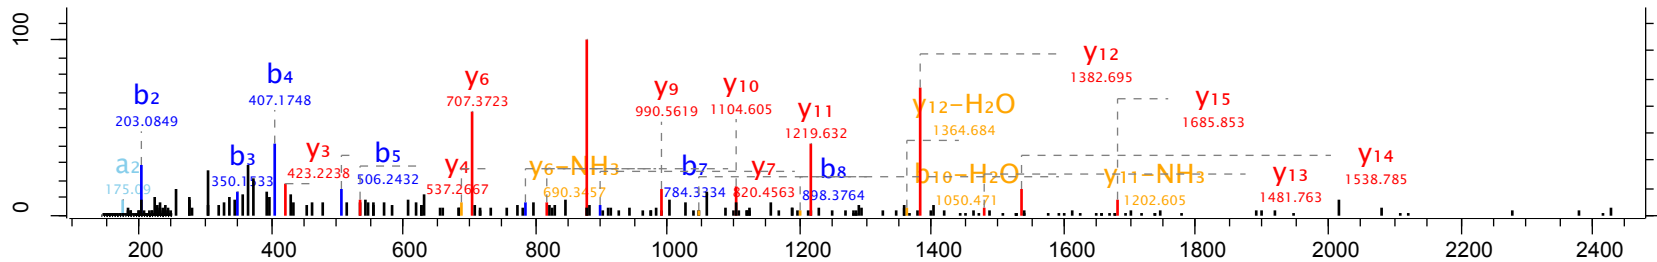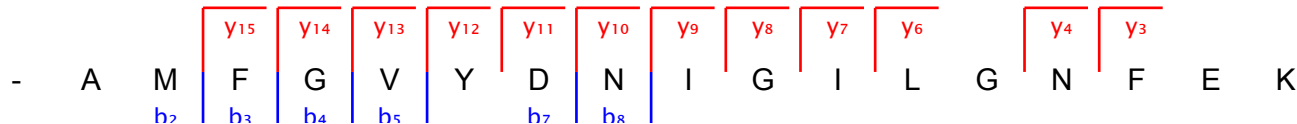

| Raw file                         | Scan  | Method   | Score | m/z   | Gene names |
|----------------------------------|-------|----------|-------|-------|------------|
| 20150226_Hela_Top_opt_A3_01_1595 | 76448 | TOF; CID | 59.71 | 844.4 | WDR45B     |

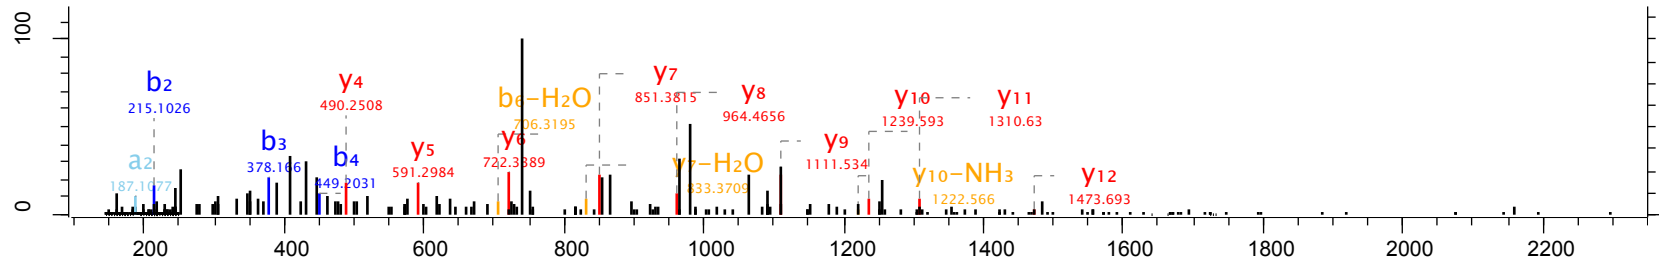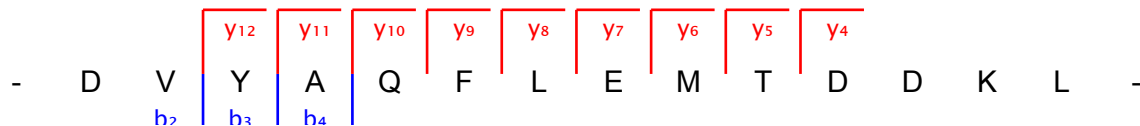

| Raw file                         | Scan  | Method   | Score | m/z    | Gene names |
|----------------------------------|-------|----------|-------|--------|------------|
| 20150226_Hela_Top_opt_A3_01_1595 | 76681 | TOF; CID | 60.13 | 814.42 | CENPK      |

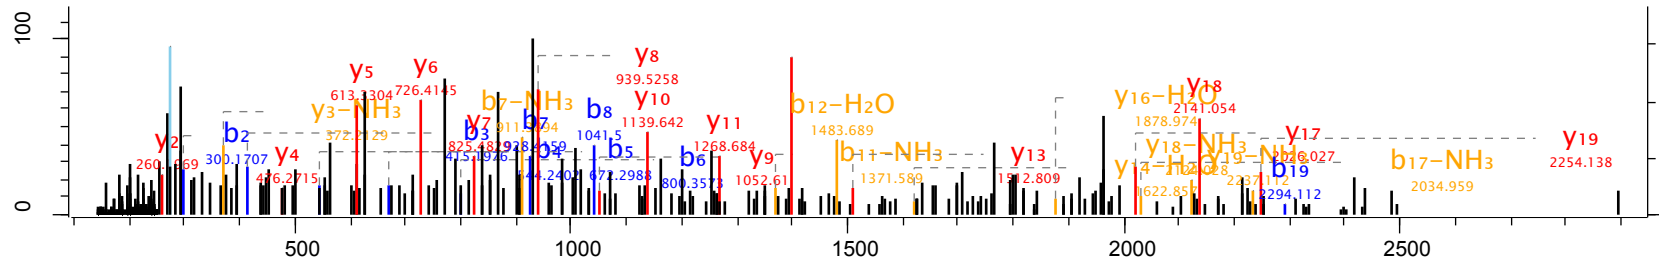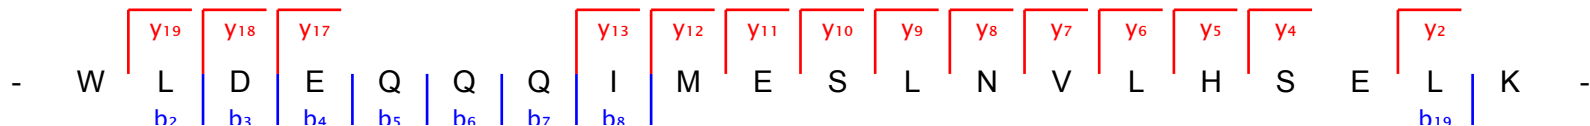

| Raw file                         | Scan  | Method   | Score | m/z    | Gene names |
|----------------------------------|-------|----------|-------|--------|------------|
| 20150226_Hela_Top_opt_A3_01_1595 | 76735 | TOF; CID | 96.25 | 839.91 | IMUP       |

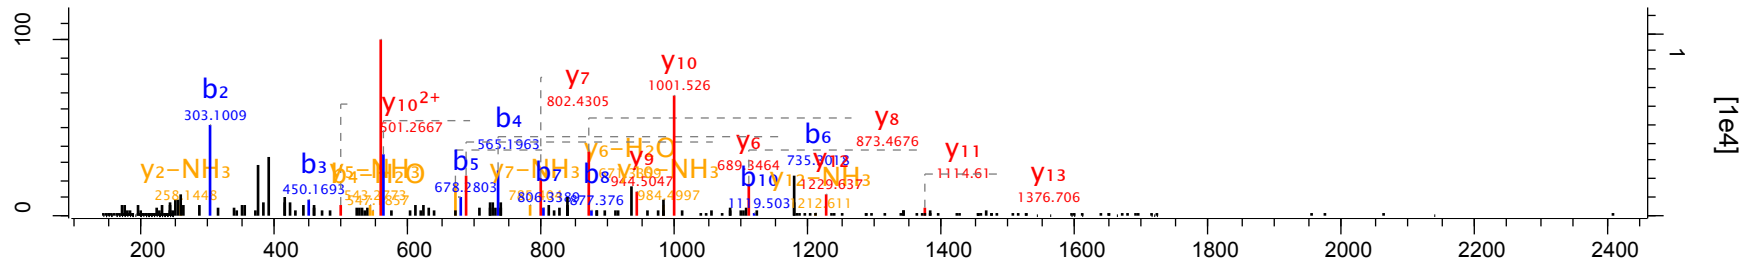

ac

|   |   |                |                 |                 |                 |                 |                |                |                |                 |                |   |   |   |   |   |
|---|---|----------------|-----------------|-----------------|-----------------|-----------------|----------------|----------------|----------------|-----------------|----------------|---|---|---|---|---|
| - | M | E              | F               | D               | L               | G               | A              | A              | L              | E               | P              | T | S | Q | K | - |
|   |   | b <sub>2</sub> | b <sub>3</sub>  | b <sub>4</sub>  | b <sub>5</sub>  | b <sub>6</sub>  | b <sub>7</sub> | b <sub>8</sub> |                | b <sub>10</sub> |                |   |   |   |   |   |
|   |   |                | y <sub>13</sub> | y <sub>12</sub> | y <sub>11</sub> | y <sub>10</sub> | y <sub>9</sub> | y <sub>8</sub> | y <sub>7</sub> | y <sub>6</sub>  | y <sub>5</sub> |   |   |   |   |   |

| Raw file                         | Scan  | Method   | Score  | m/z    | Gene names |
|----------------------------------|-------|----------|--------|--------|------------|
| 20150226_Hela_Top_opt_A3_01_1595 | 76834 | TOF; CID | 108.35 | 636.38 | CRADD      |

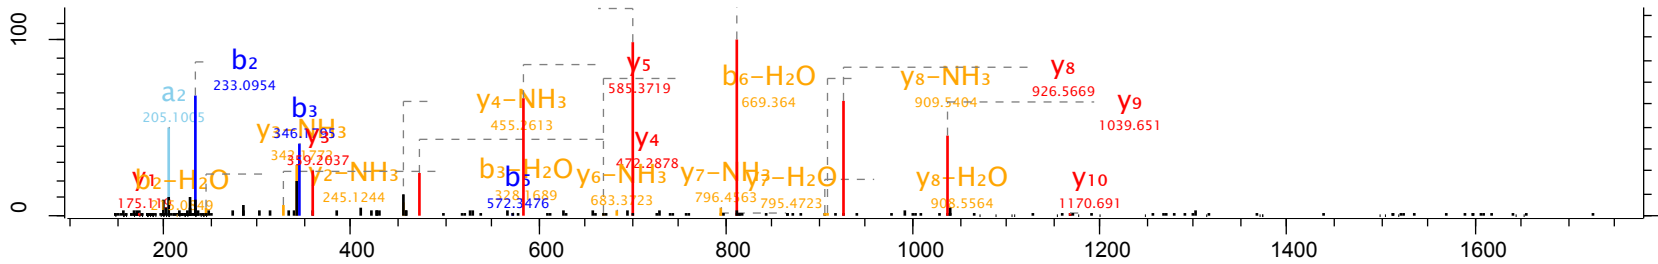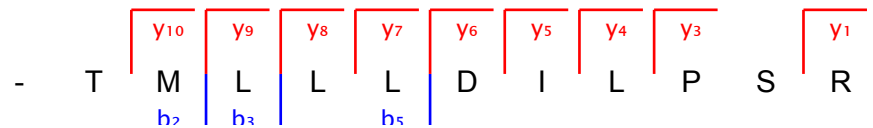

Raw file

20150226\_Hela\_Top\_opt\_A3\_01\_1595

Scan

77016

Method

TOF; CID

Score

118.31

m/z

620.02

Gene names

GIPC2

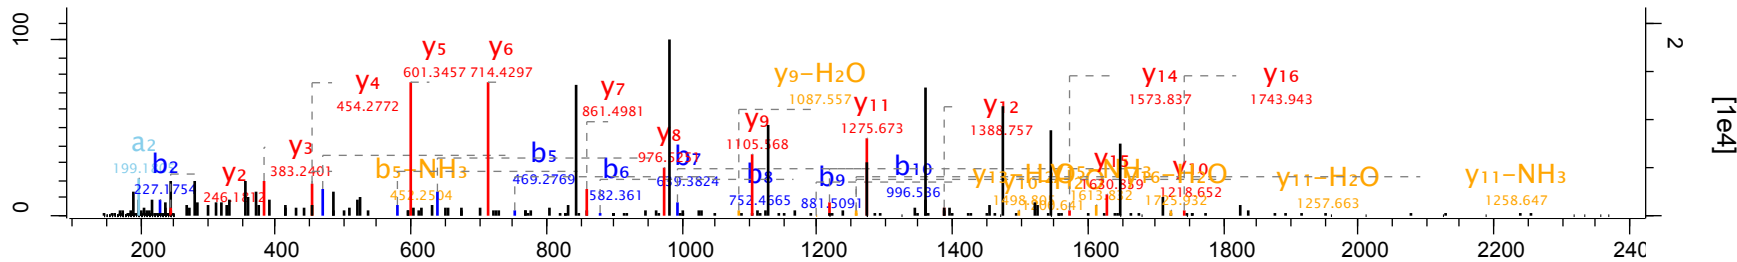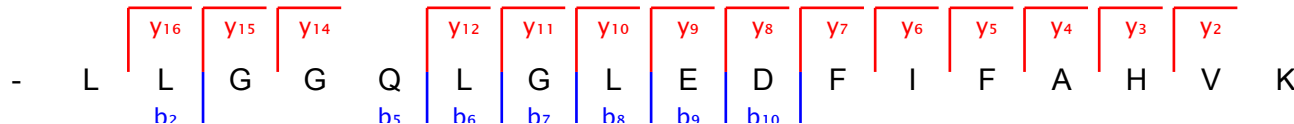

Raw file

20150226\_Hela\_Top\_opt\_A3\_01\_1595

Scan

77475

Method

TOF; CID

Score

59.91

m/z

979.85

Gene names

TBP;TBPL2

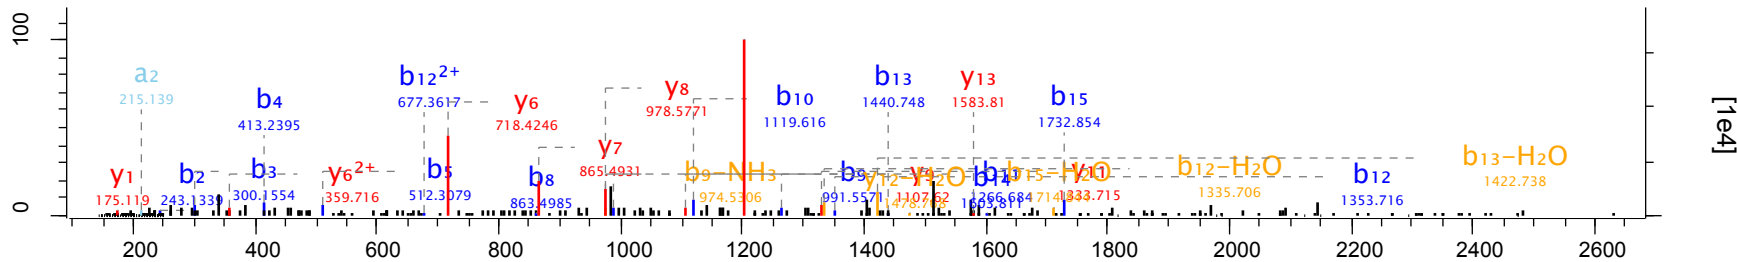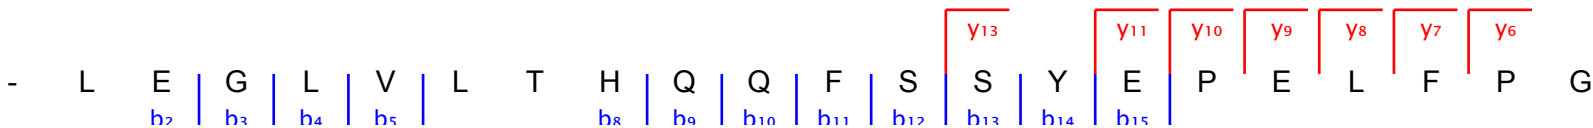



| Raw file                         | Scan  | Method   | Score | m/z    | Gene names |
|----------------------------------|-------|----------|-------|--------|------------|
| 20150226_Hela_Top_opt_A3_01_1595 | 78115 | TOF; CID | 69.67 | 613.83 | DOLK       |

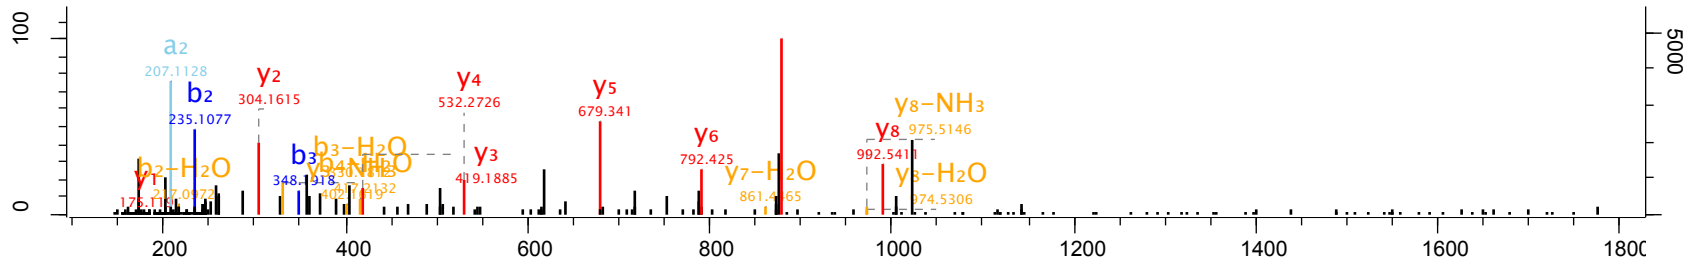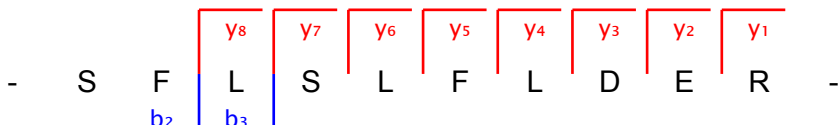

| Raw file                         | Scan  | Method   | Score | m/z    | Gene names |
|----------------------------------|-------|----------|-------|--------|------------|
| 20150226_Hela_Top_opt_A3_01_1595 | 78257 | TOF; CID | 89.19 | 678.86 | C8orf82    |

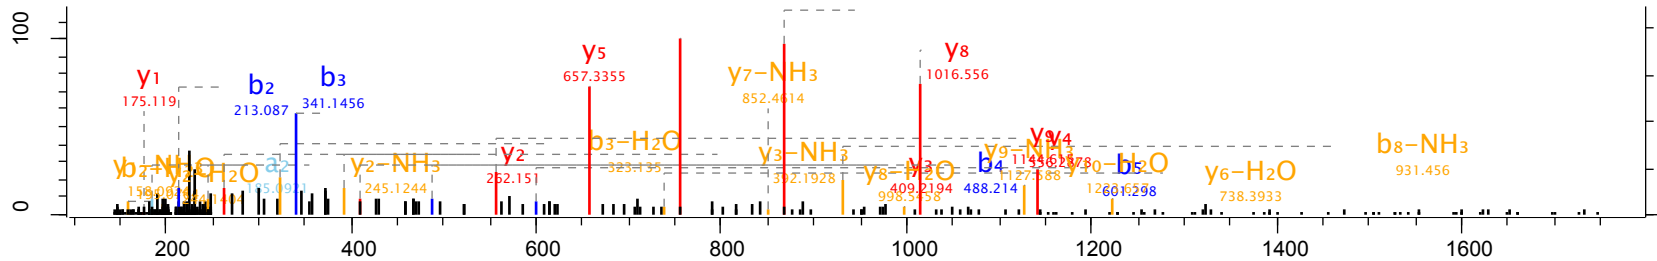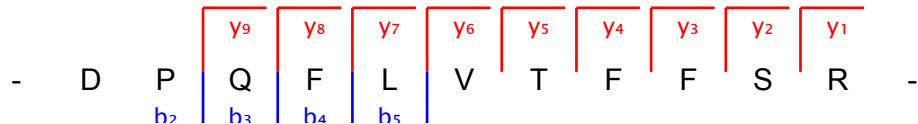

| Raw file                         | Scan  | Method   | Score | m/z     | Gene names |
|----------------------------------|-------|----------|-------|---------|------------|
| 20150226_Hela_Top_opt_A3_01_1595 | 78341 | TOF; CID | 36.89 | 1131.58 | OGFOD2     |

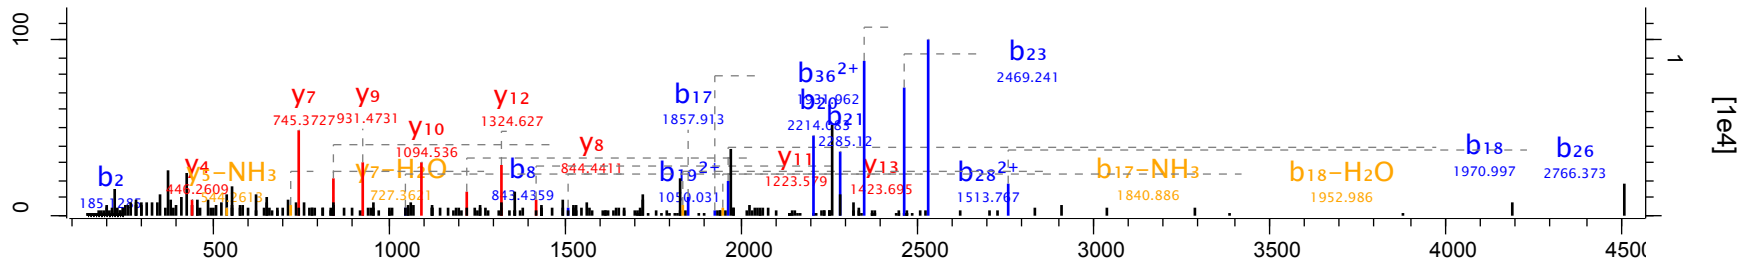

- A L I A S S Y H P A R P E V Y D S L Q D A

b<sub>2</sub> | 
 y<sub>3</sub>-NH<sub>3</sub> | 
 y<sub>7</sub> | 
 y<sub>9</sub> | 
 y<sub>7</sub>-H<sub>2</sub>O | 
 y<sub>10</sub> | 
 y<sub>12</sub> | 
 y<sub>8</sub> | 
 b<sub>8</sub> | 
 b<sub>17</sub> | 
 b<sub>19</sub><sup>2+</sup> | 
 y<sub>11</sub> | 
 b<sub>20</sub><sup>2+</sup> | 
 b<sub>21</sub><sup>2+</sup> | 
 y<sub>13</sub> | 
 b<sub>23</sub> | 
 b<sub>28</sub><sup>2+</sup> | 
 b<sub>17</sub>-NH<sub>3</sub> | 
 b<sub>18</sub>-H<sub>2</sub>O | 
 b<sub>18</sub> | 
 b<sub>26</sub>

Raw file

20150226\_Hela\_Top\_opt\_A3\_01\_1595

Scan

81542

Method

TOF; CID

Score

85.18

m/z

1132.61

Gene names

SSR2

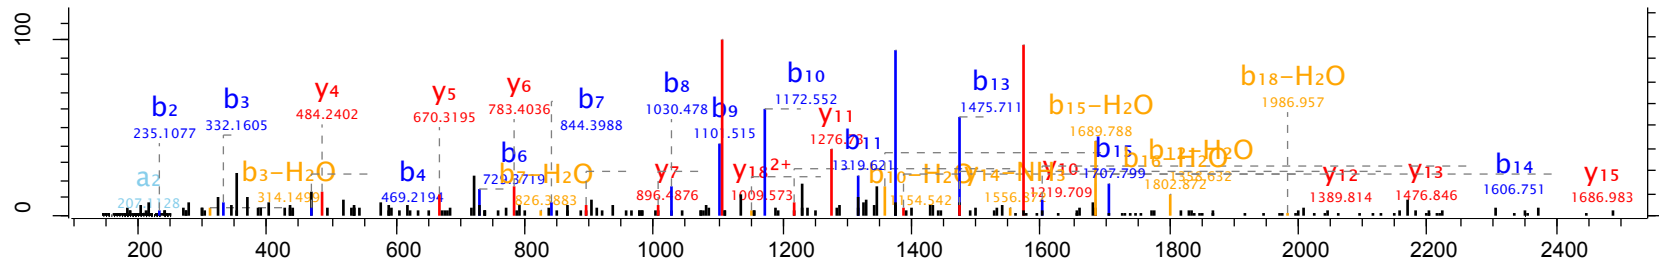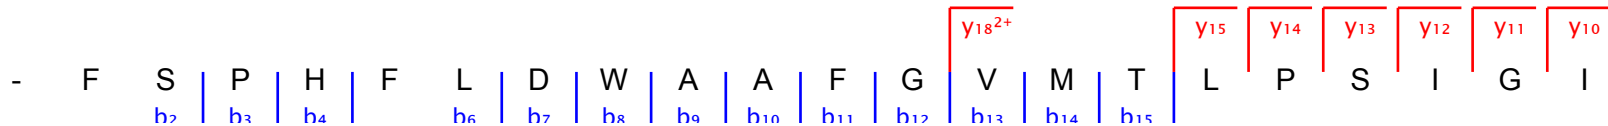

| Raw file                         | Scan  | Method   | Score | m/z    | Gene names |
|----------------------------------|-------|----------|-------|--------|------------|
| 20150226_Hela_Top_opt_A3_01_1595 | 81677 | TOF; CID | 67.5  | 979.51 | FANCG      |

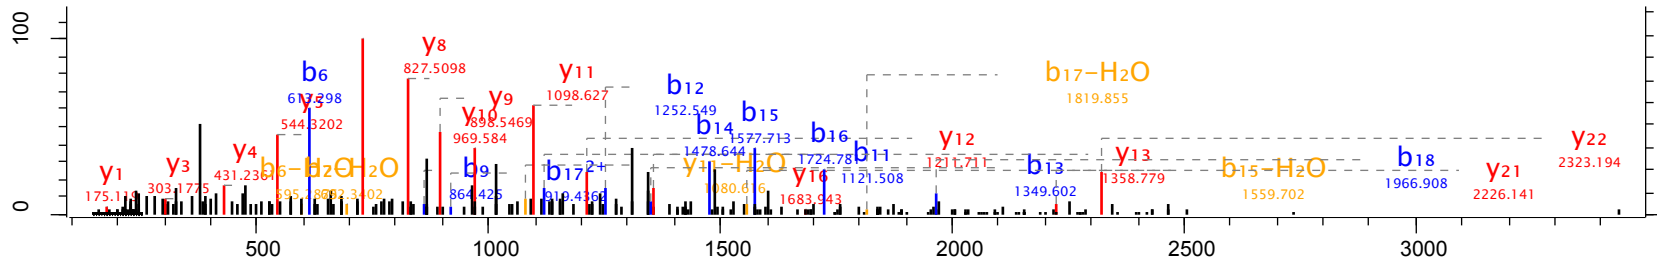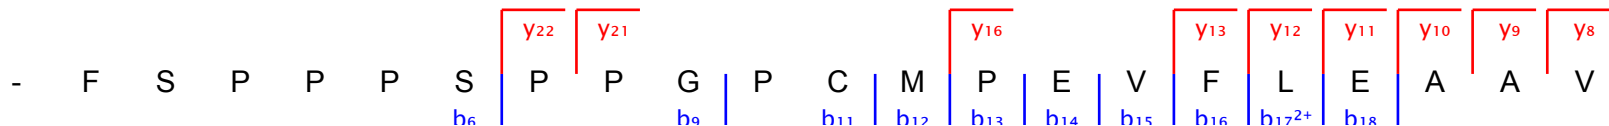

| Raw file                         | Scan  | Method   | Score | m/z    | Gene names |
|----------------------------------|-------|----------|-------|--------|------------|
| 20150226_Hela_Top_opt_A3_01_1595 | 81909 | TOF; CID | 79.65 | 841.43 | SENP8      |

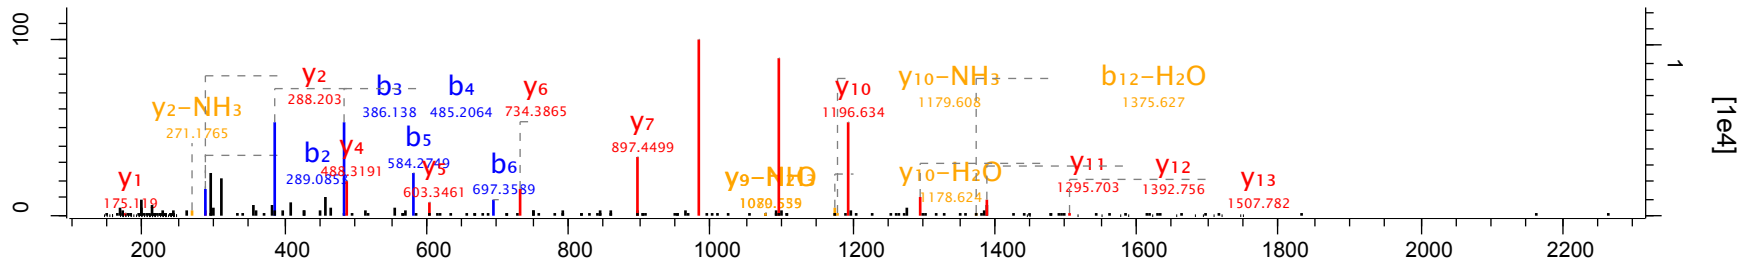

ac

- M D P V V L S Y M D S L L R -

b2 b3 b4 b5 b6

y13 y12 y11 y10 y9 y8 y7 y6 y5 y4 y2 y1
