# Supplementary material for: The Impact II, a Very High-Resolution Quadrupole Time-of-Flight Instrument (QTOF) for Deep Shotgun Proteomics
Source: PubMed Central journal article supplement (PMC4587313; doi:10.1074/mcp.m114.047407), 2015-05-19
Supplement: supp_M114.047407_mcp.M114.047407-8.pdf [file supp_M114.047407_mcp.M114.047407-8.pdf]

Raw file

Scan

Method

Score

m/z

Gene names

20150306\_yeast1\_Top\_opt\_2ug\_C1\_01\_1663

2603

TOF; CID

68.02

422.22

DAM1

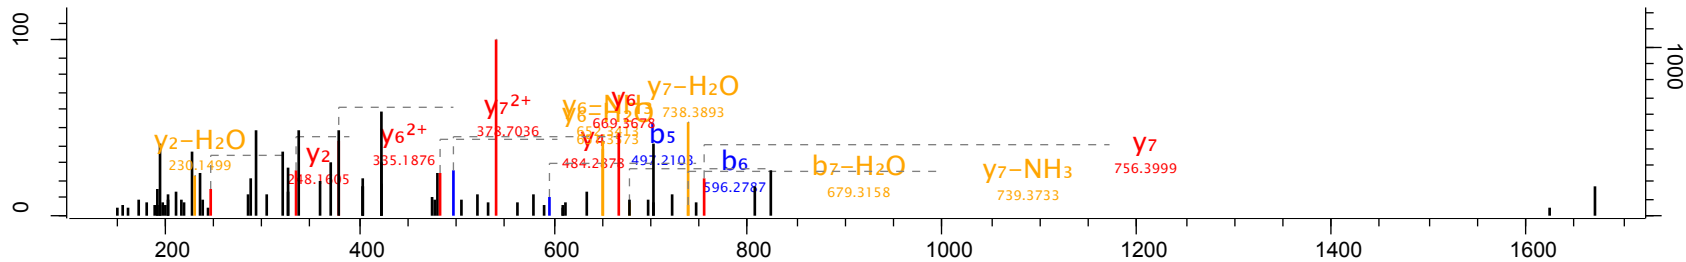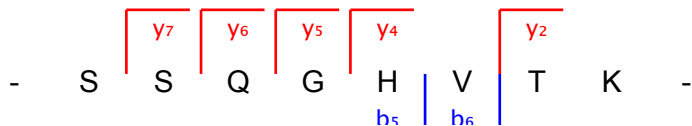

Raw file

Scan

Method

Score

m/z

Gene names

20150306\_yeast1\_Top\_opt\_2ug\_C1\_01\_1663

8152

TOF; CID

69.82

379.7

RPS26A

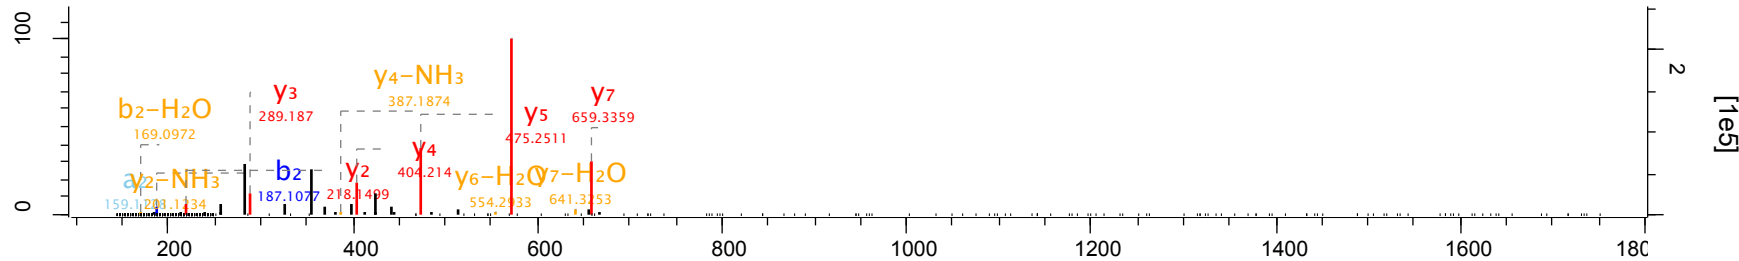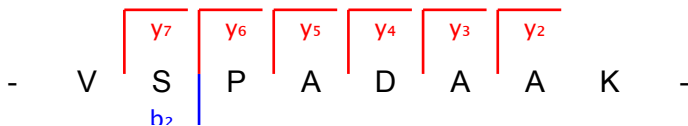

Raw file

Scan

Method

Score

m/z

Gene names

20150306\_yeast1\_Top\_opt\_2ug\_C1\_01\_1663

8893

TOF; CID

105.1

549.74

MIX17

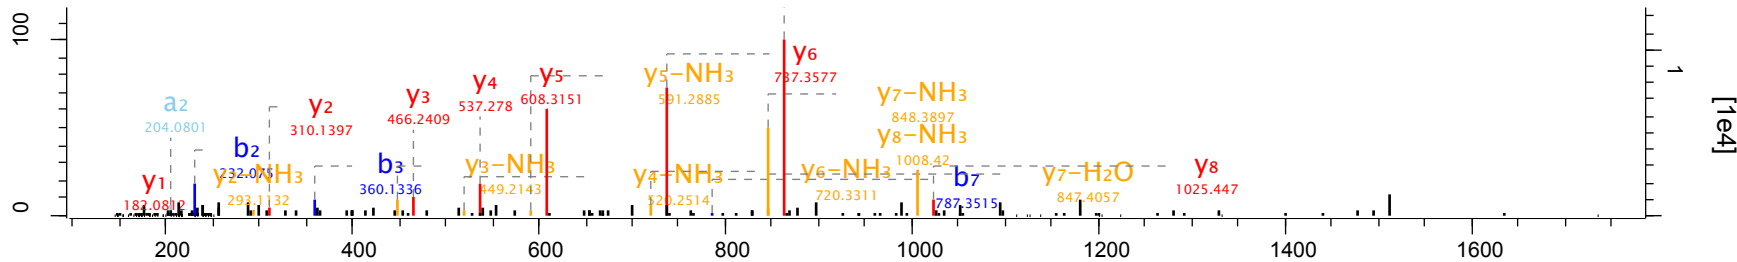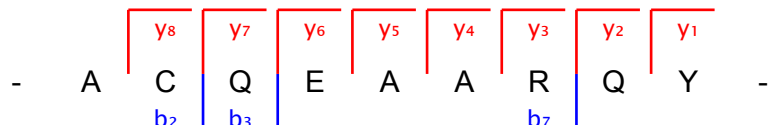

Raw file

Scan

Method

Score

m/z

Gene names

20150306\_yeast1\_Top\_opt\_2ug\_C1\_01\_1663

9613

TOF; CID

94.69

648.75

POP8

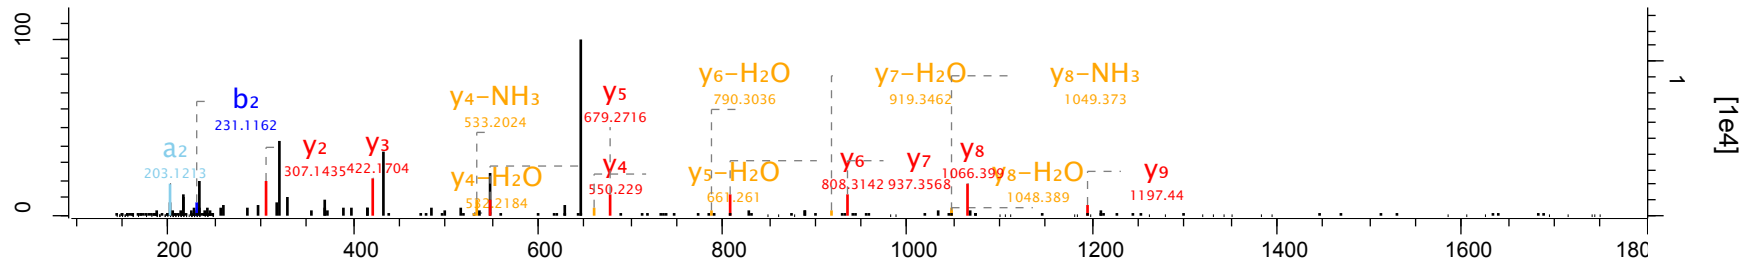

- V M E E E E Q D C K -

y9 y8 y7 y6 y5 y4 y3 y2  
b2

Raw file

20150306\_yeast1\_Top\_opt\_2ug\_C1\_01\_1663

Scan

10702

Method

TOF; CID

Score

72.62

m/z

564.27

Gene names

YMD8

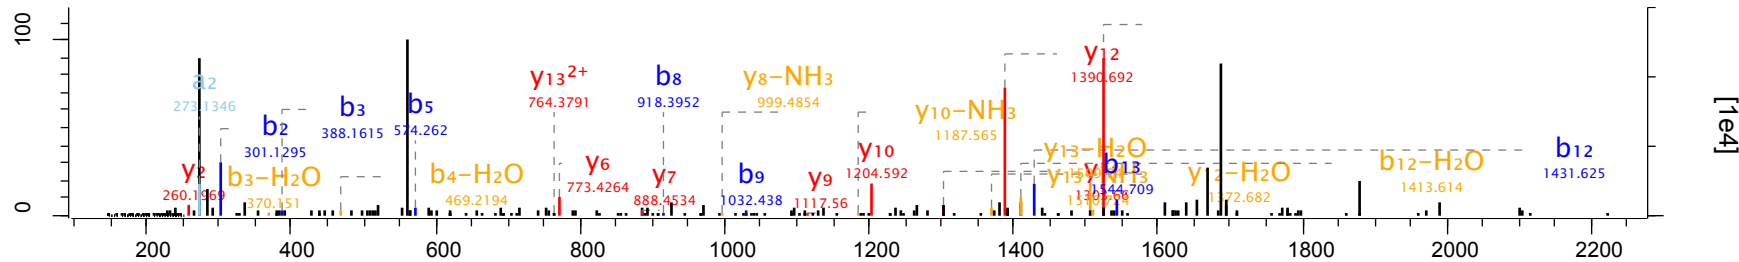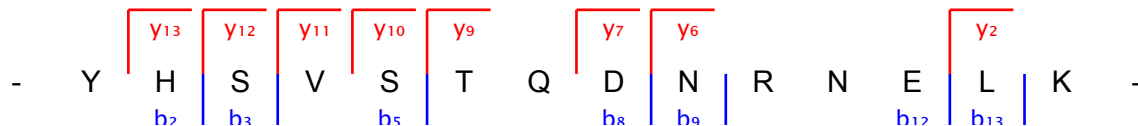

Raw file

Scan

Method

Score

m/z

Gene names

20150306\_yeast1\_Top\_opt\_2ug\_C1\_01\_1663

17746

TOF; CID

72.32

705.36

OGG1

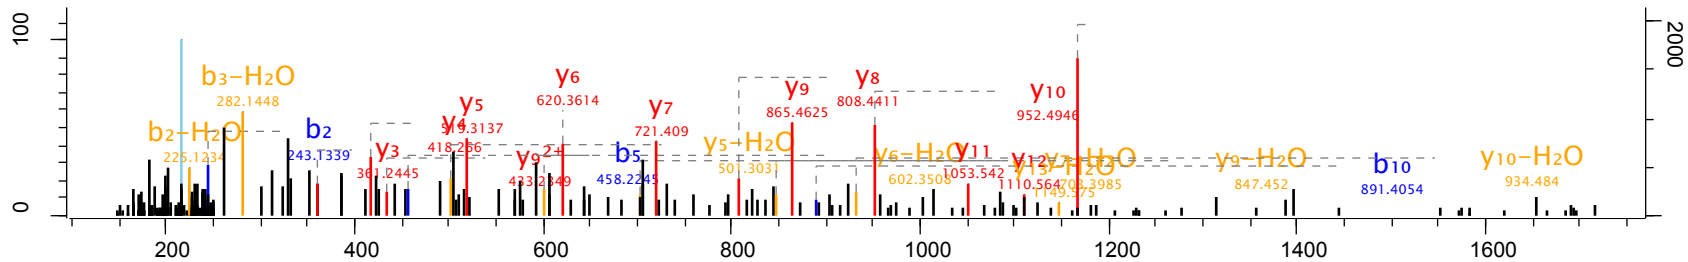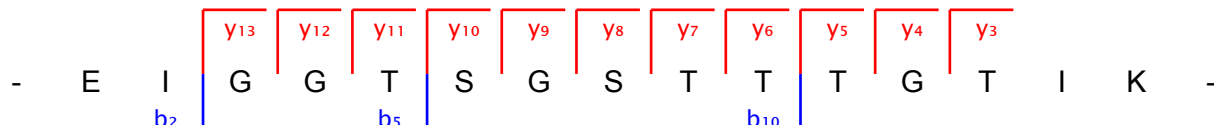

Raw file

Scan

Method

Score

m/z

Gene names

20150306\_yeast1\_Top\_opt\_2ug\_C1\_01\_1663

18215

TOF; CID

83.18

580.78

DLS1

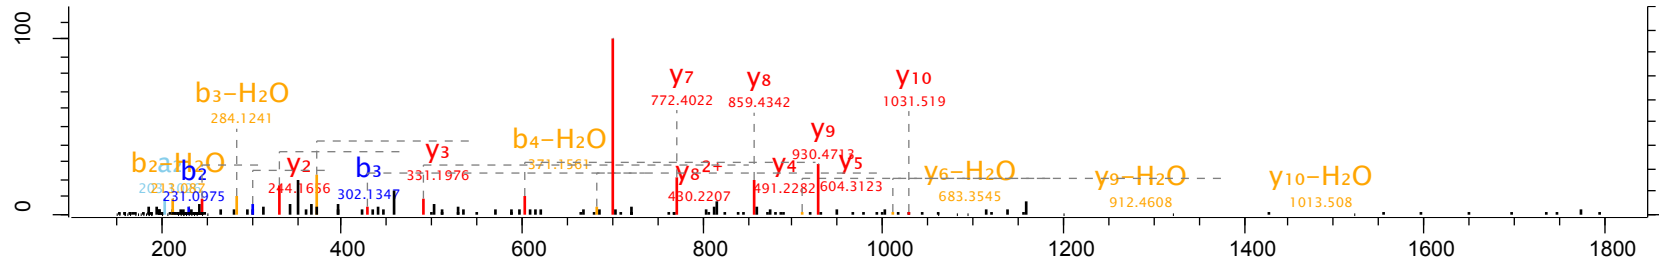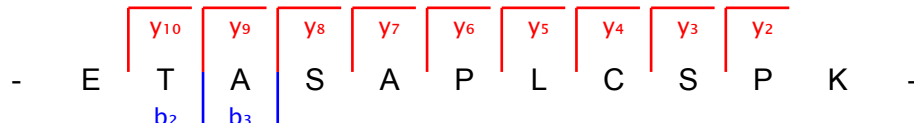

Raw file

Scan

Method

Score

m/z

Gene names

20150306\_yeast1\_Top\_opt\_2ug\_C1\_01\_1663

31245

TOF; CID

68.56

513.26

TAT2

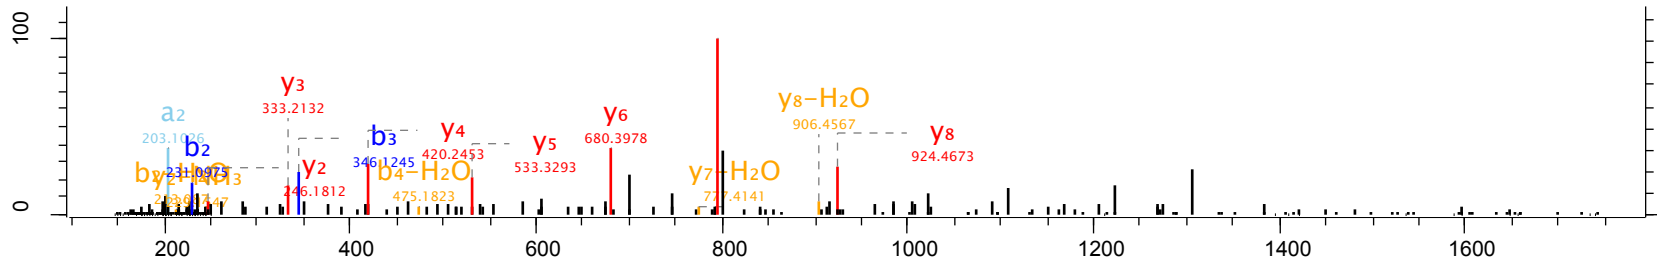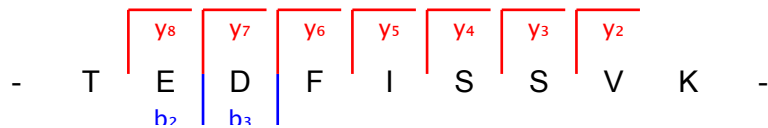



Raw file

20150306\_yeast1\_Top\_opt\_2ug\_C1\_01\_1663

Scan

32609

Method

TOF; CID

Score

104.06

m/z

513.25

Gene names

OM14

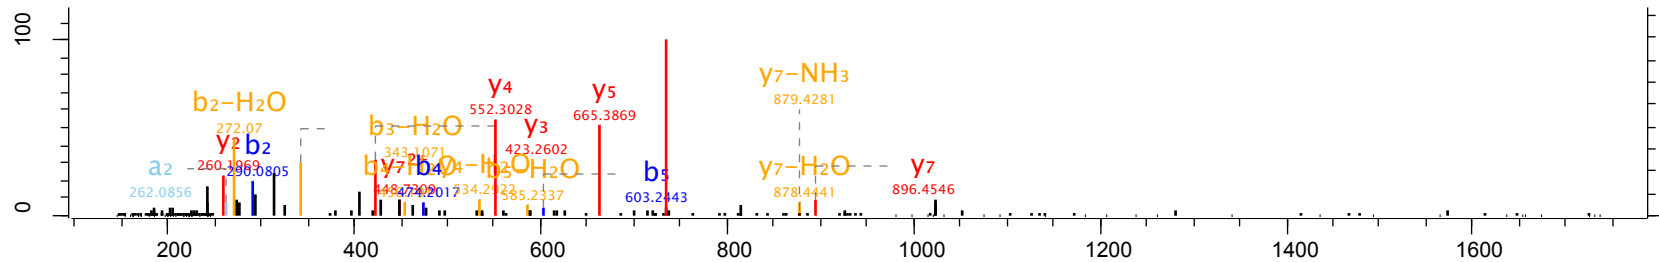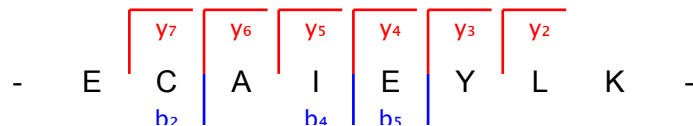

Raw file

Scan

Method

Score

m/z

Gene names

20150306\_yeast1\_Top\_opt\_2ug\_C1\_01\_1663

34988

TOF; CID

135.08

1006.48

MGR2

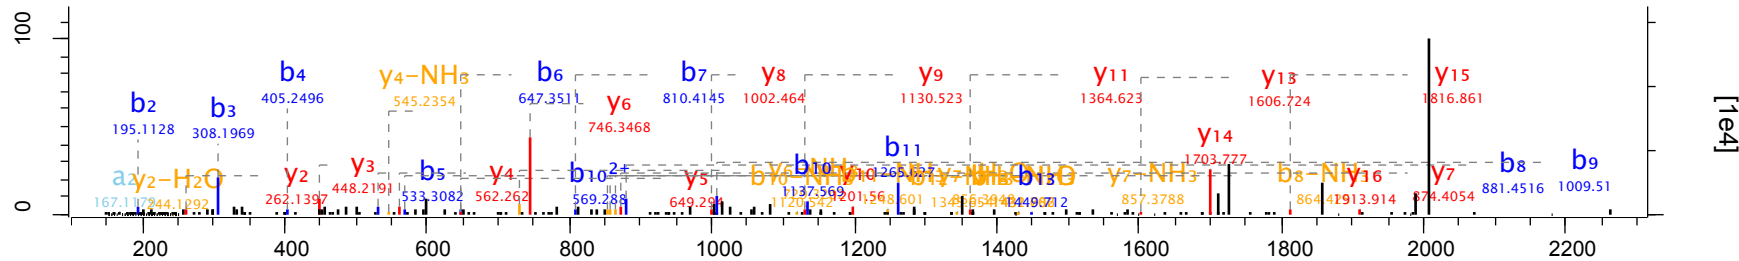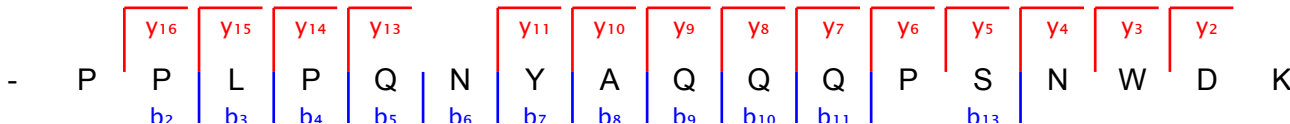

Raw file

20150306\_yeast1\_Top\_opt\_2ug\_C1\_01\_1663

Scan

36755

Method

TOF; CID

Score

50.35

m/z

458.94

Gene names

ASE1

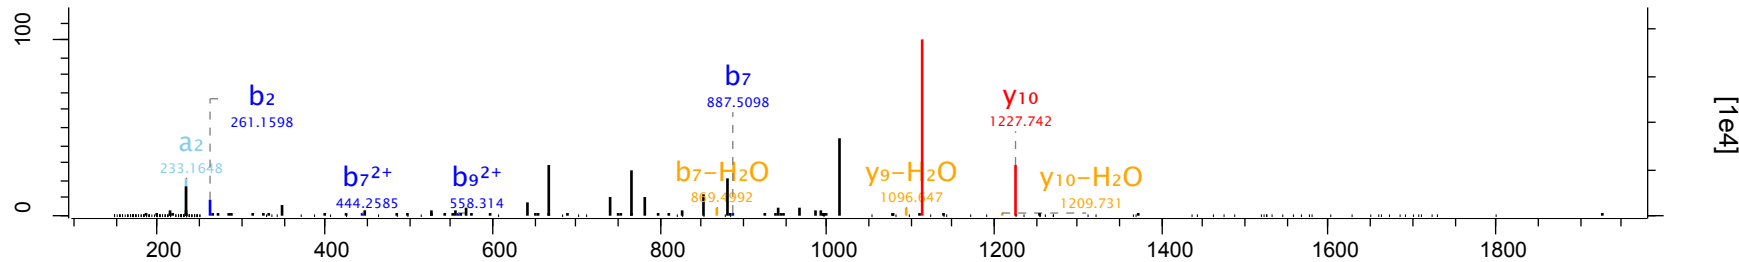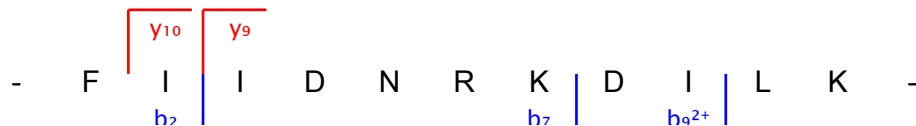

Raw file

Scan

Method

Score

m/z

Gene names

20150306\_yeast1\_Top\_opt\_2ug\_C1\_01\_1663

37100

TOF; CID

62.47

458.93

TAD3

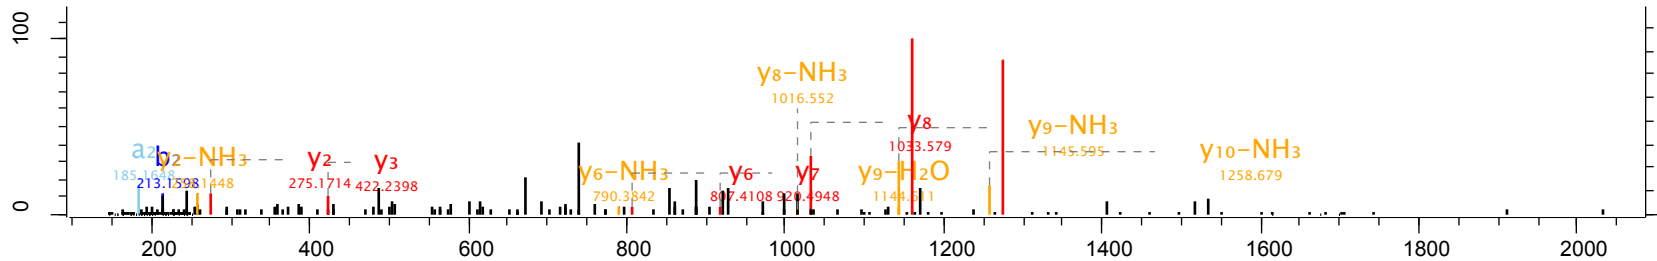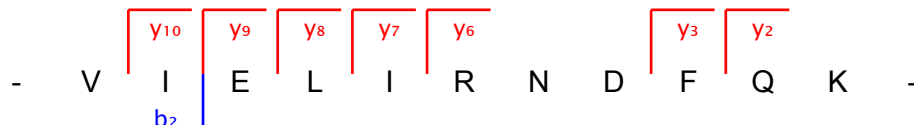

Raw file

Scan

Method

Score

m/z

Gene names

20150306\_yeast1\_Top\_opt\_2ug\_C1\_01\_1663

37849

TOF; CID

63.57

450.28

MAM1

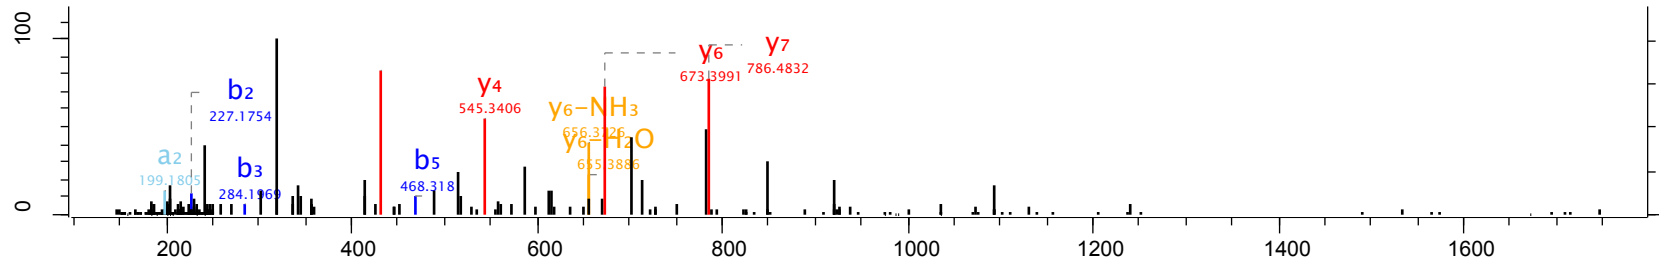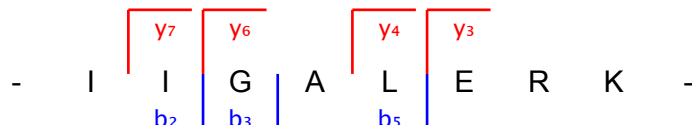

Raw file

Scan

Method

Score

m/z

Gene names

20150306\_yeast1\_Top\_opt\_2ug\_C1\_01\_1663

39678

TOF; CID

82.71

513.76

NIS1

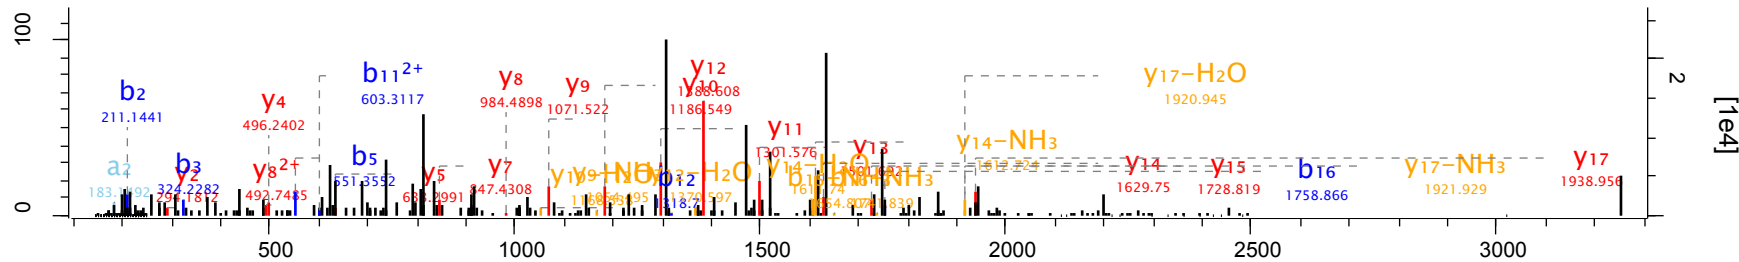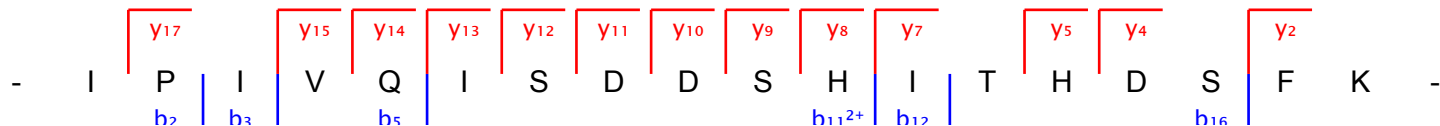

Raw file

20150306\_yeast1\_Top\_opt\_2ug\_C1\_01\_1663

Scan

40554

Method

TOF; CID

Score

91.66

m/z

400.87

Gene names

KSH1

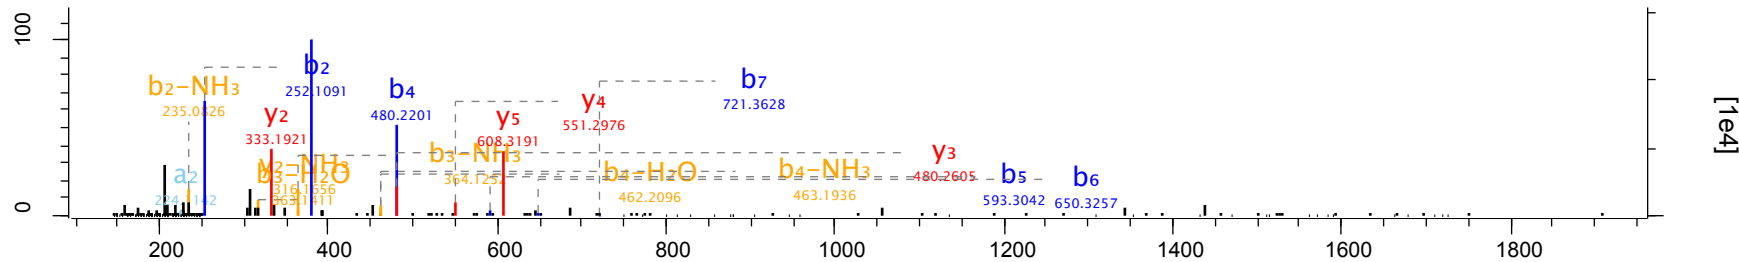

- N H E V L G A F W K -

b<sub>2</sub> | 
 b<sub>3</sub> | 
 b<sub>4</sub> | 
 b<sub>5</sub> | 
 y<sub>5</sub> | 
 y<sub>4</sub> | 
 y<sub>3</sub> | 
 y<sub>2</sub>

Raw file

Scan

Method

Score

m/z

20150306\_yeast1\_Top\_opt\_2ug\_C1\_01\_1663

40784

TOF; CID

56.4

532.8

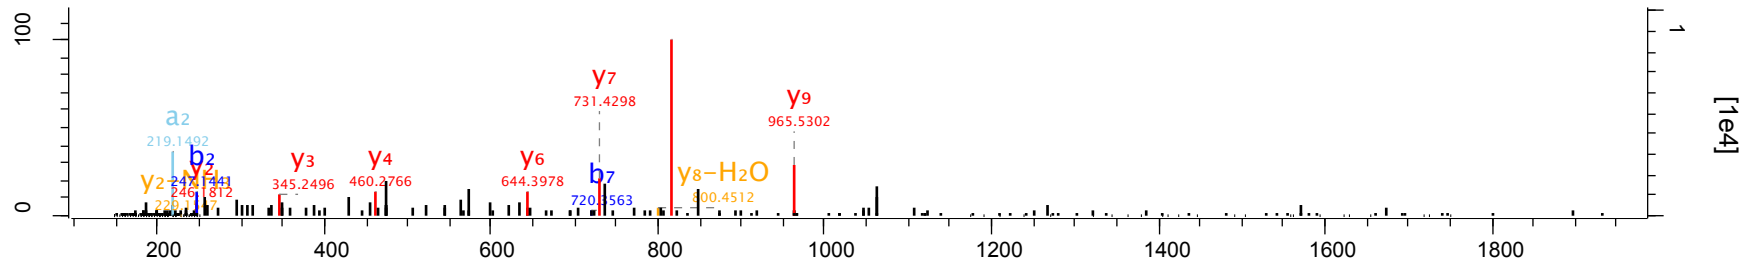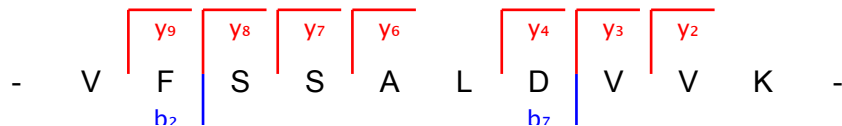



Raw file

20150306\_yeast1\_Top\_opt\_2ug\_C1\_01\_1663

Scan

41027

Method

TOF; CID

Score

162.68

m/z

477.6

Gene names

ERV15

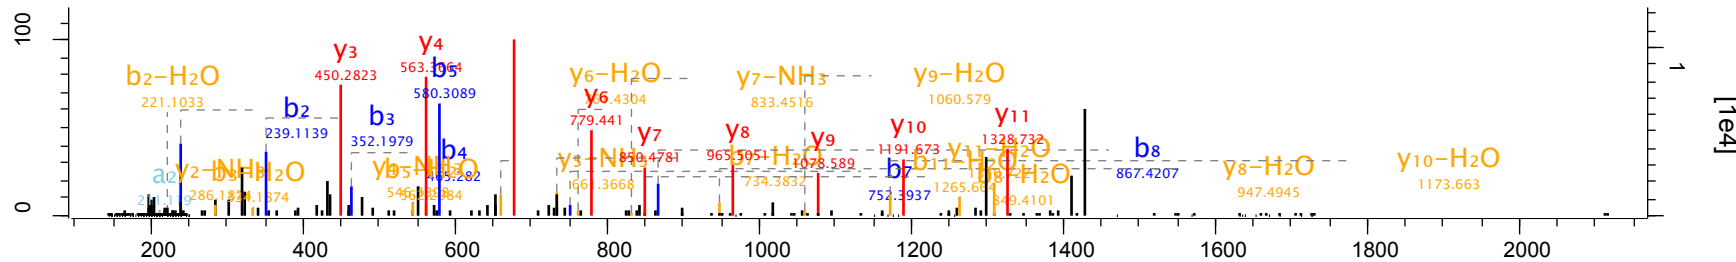

- T H L L D A T D I F R K -

y11 y10 y9 y8 y7 y6 y5 y4 y3  
b2 b3 b4 b5 b7 b8

Raw file

Scan

Method

Score

m/z

Gene names

20150306\_yeast1\_Top\_opt\_2ug\_C1\_01\_1663

41394

TOF; CID

106.67

645.34

YFH1

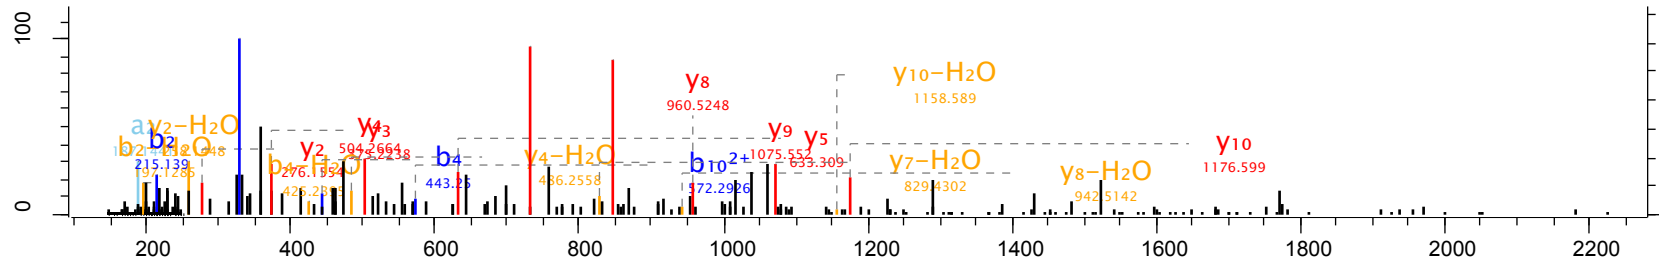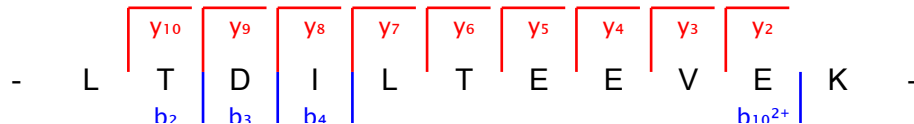

Raw file

Scan

Method

Score

m/z

Gene names

20150306\_yeast1\_Top\_opt\_2ug\_C1\_01\_1663

42729

TOF; CID

98.01

439.77

RAM2

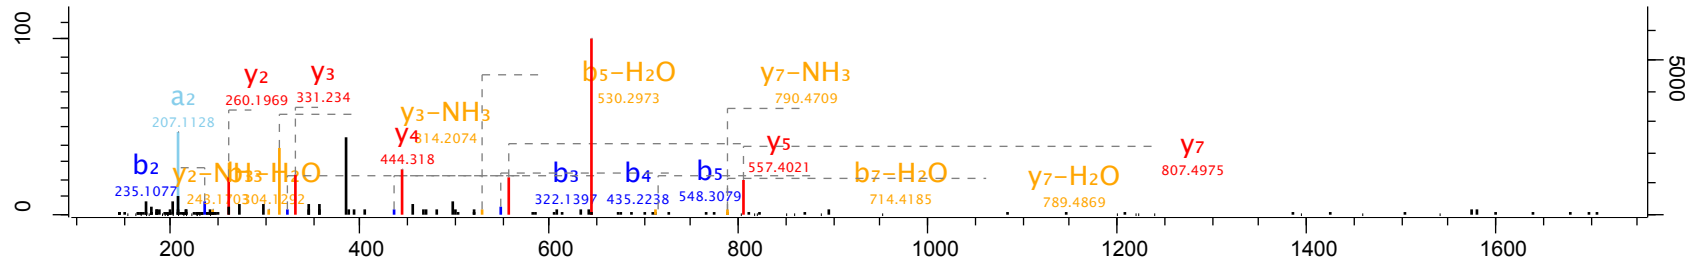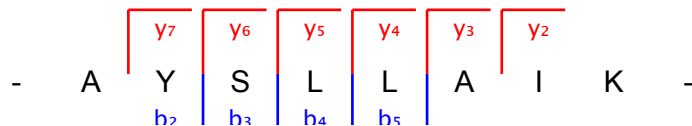

Raw file

20150306\_yeast1\_Top\_opt\_2ug\_C1\_01\_1663

Scan

42805

Method

TOF; CID

Score

87.51

m/z

645.08

Gene names

AUR1

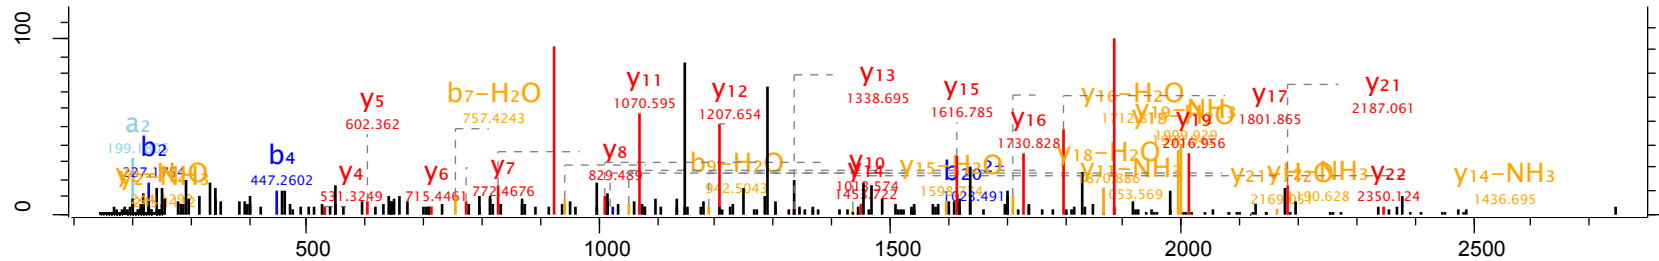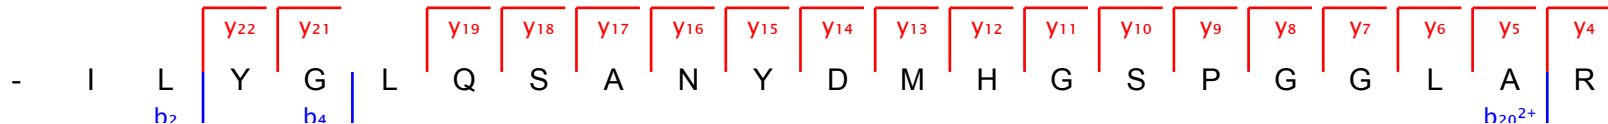

Raw file

Scan

Method

Score

m/z

Gene names

20150306\_yeast1\_Top\_opt\_2ug\_C1\_01\_1663

42984

TOF; CID

61.34

548.81

PMT5

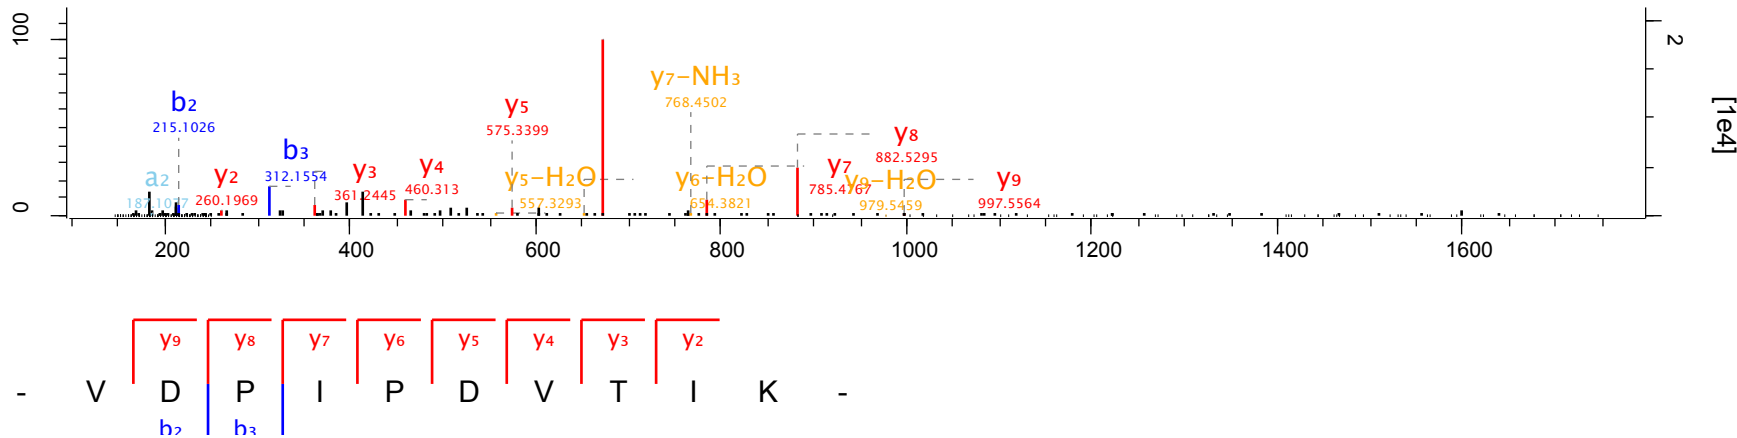

Raw file

Scan

Method

Score

m/z

20150306\_yeast1\_Top\_opt\_2ug\_C1\_01\_1663

43550

TOF; CID

81.62

666.32

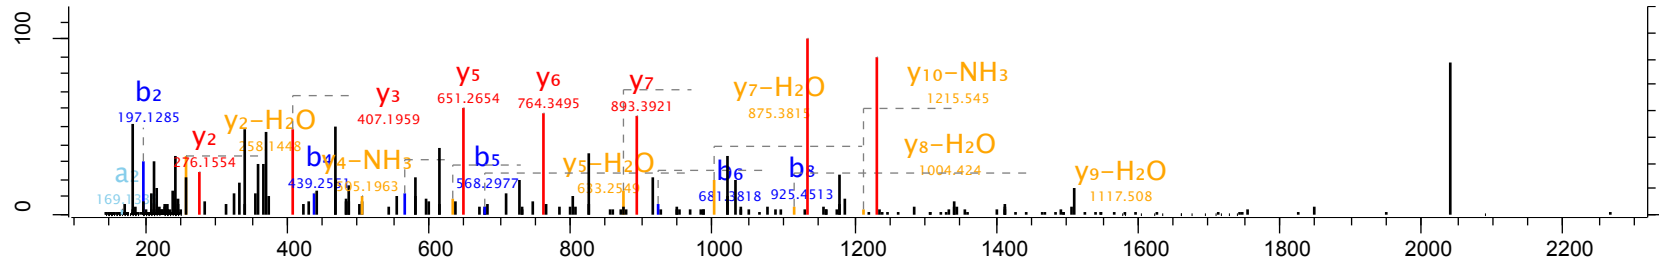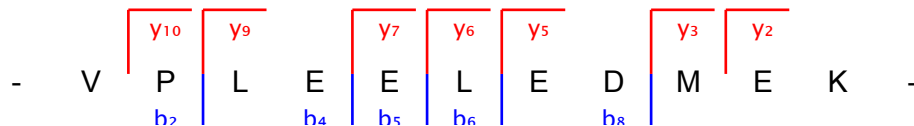

Raw file

Scan

Method

Score

m/z

Gene names

20150306\_yeast1\_Top\_opt\_2ug\_C1\_01\_1663

44009

TOF; CID

66.27

469.96

ALG8

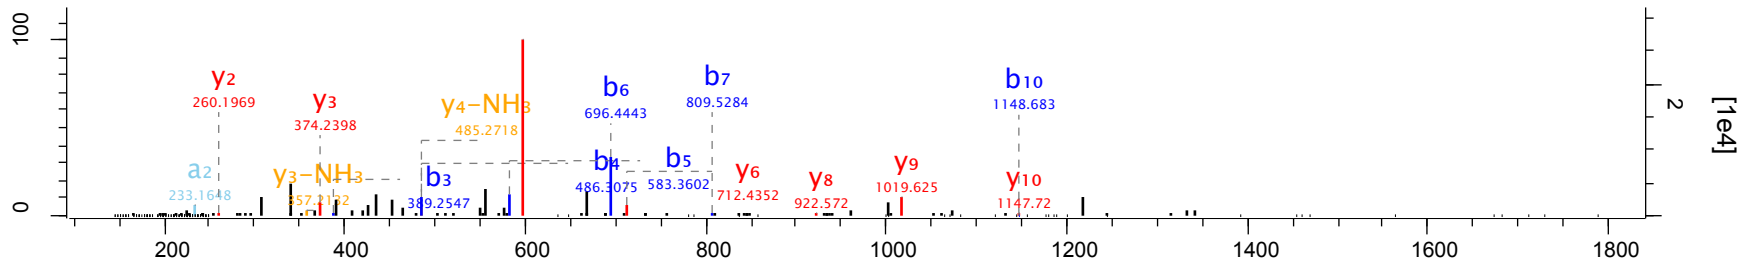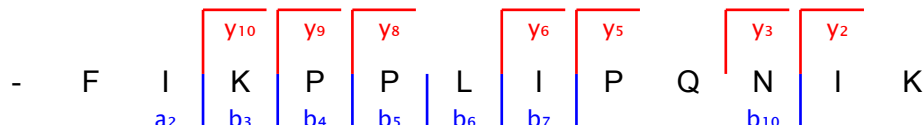

Raw file

Scan

Method

Score

m/z

Gene names

20150306\_yeast1\_Top\_opt\_2ug\_C1\_01\_1663

49601

TOF; CID

103.08

604.86

SAN1

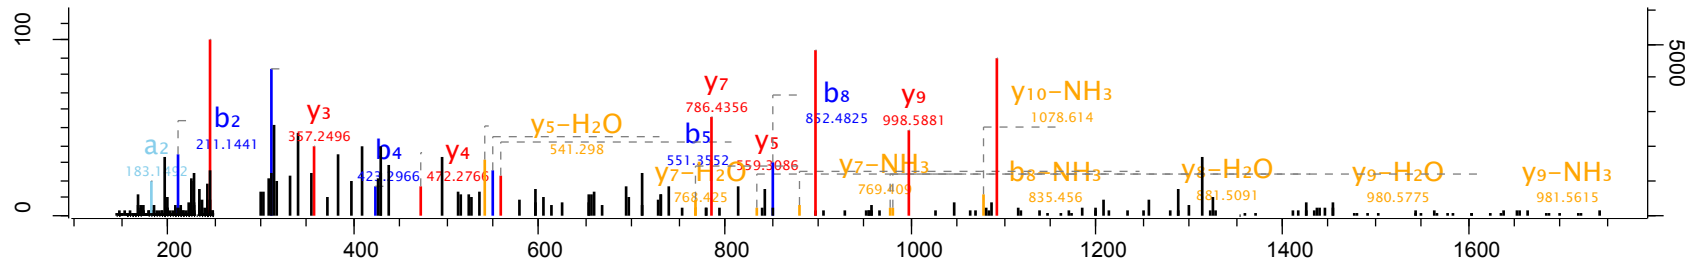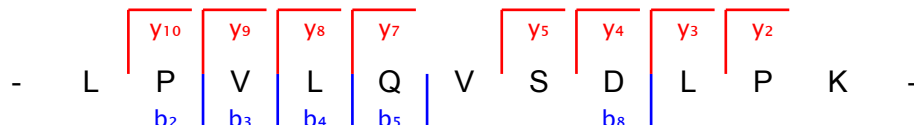



Raw file

Scan

Method

Score

m/z

Gene names

20150306\_yeast1\_Top\_opt\_2ug\_C1\_01\_1663

60070

TOF; CID

102.89

917.02

VMA11

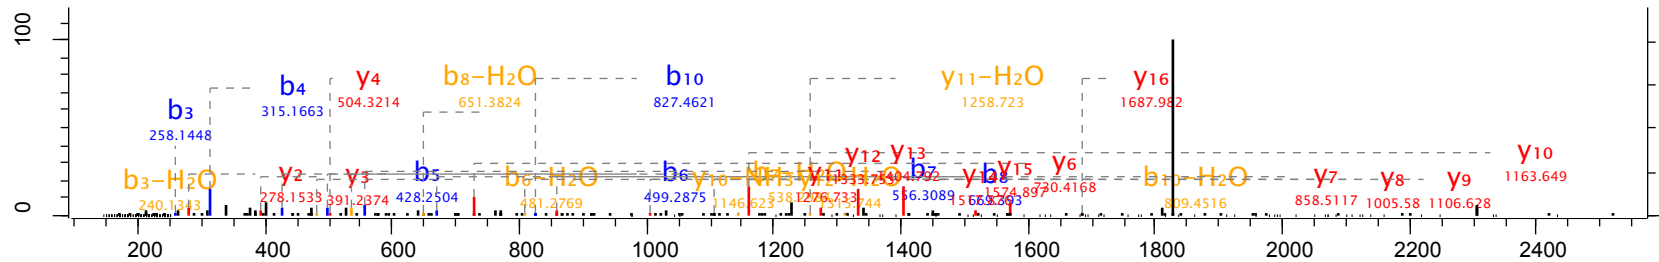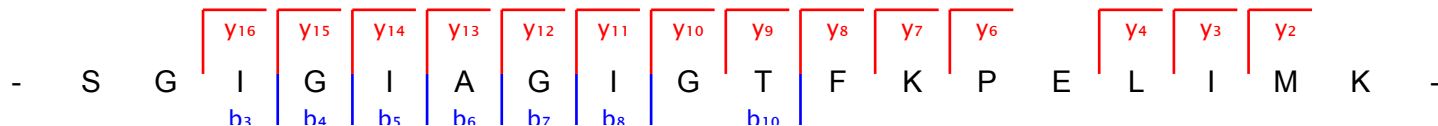

Raw file

20150306\_yeast1\_Top\_opt\_2ug\_C1\_01\_1663

Scan

60574

Method

TOF; CID

Score

33.32

m/z

1017.82

Gene names

BAP3

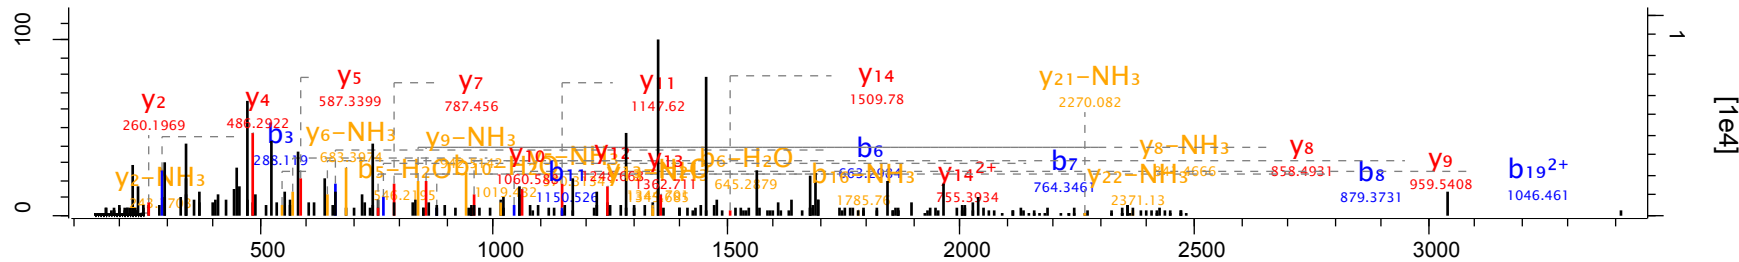

- S A E F E V T D S A L Y N N F N T S T T A

h<sub>3</sub> | h<sub>6</sub> | h<sub>7</sub> | h<sub>8</sub> | h<sub>11</sub> | h<sub>19</sub><sup>2+</sup>

y<sub>14</sub> | y<sub>13</sub> | y<sub>12</sub> | y<sub>11</sub> | y<sub>10</sub> | y<sub>9</sub> | y<sub>8</sub>

Raw file

Scan

Method

Score

m/z

Gene names

20150306\_yeast1\_Top\_opt\_2ug\_C1\_01\_1663

61595

TOF; CID

103.41

1004.03

VMA3

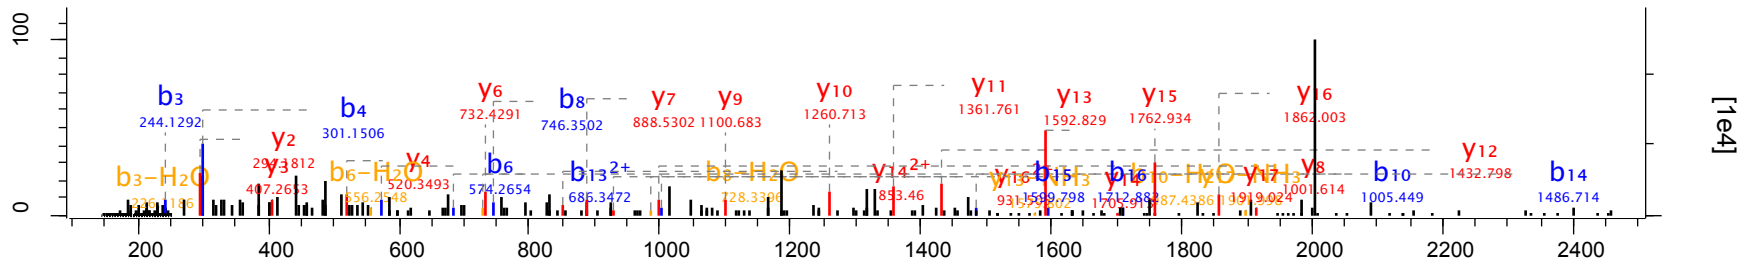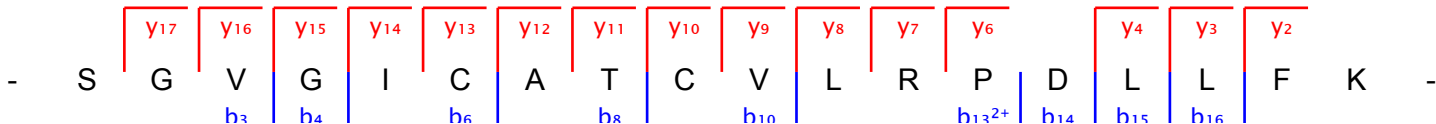

Raw file

Scan

Method

Score

m/z

Gene names

20150306\_yeast1\_Top\_opt\_2ug\_C1\_01\_1663

61632

TOF; CID

52.58

709.37

ASI1

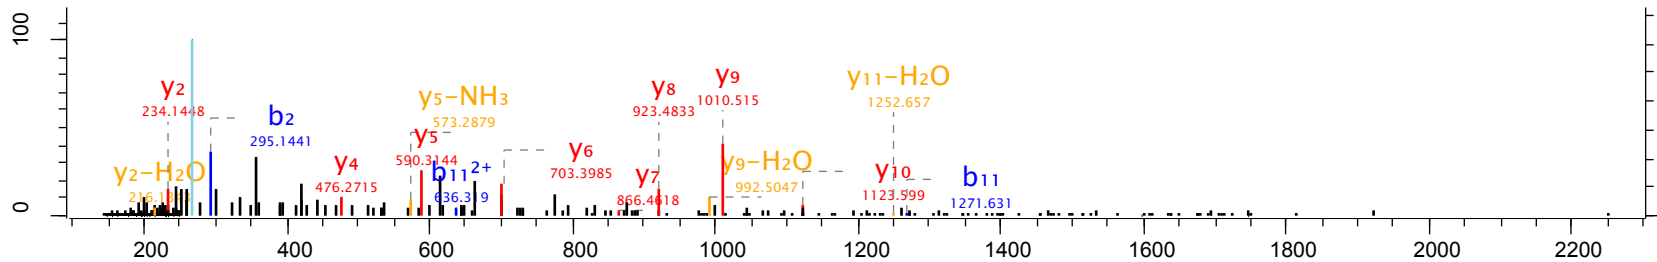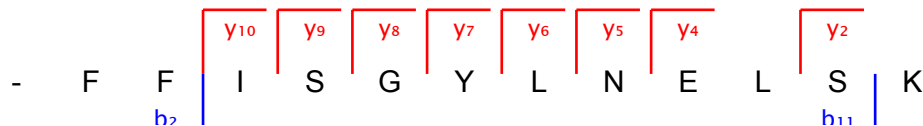

Raw file

Scan

Method

Score

m/z

Gene names

20150306\_yeast1\_Top\_opt\_2ug\_C1\_01\_1663

67173

TOF; CID

90.91

1188.54

TRM12

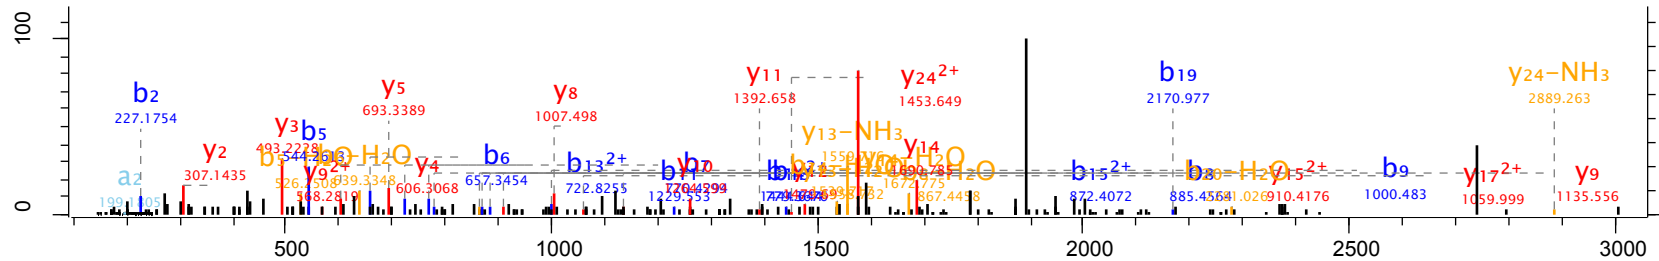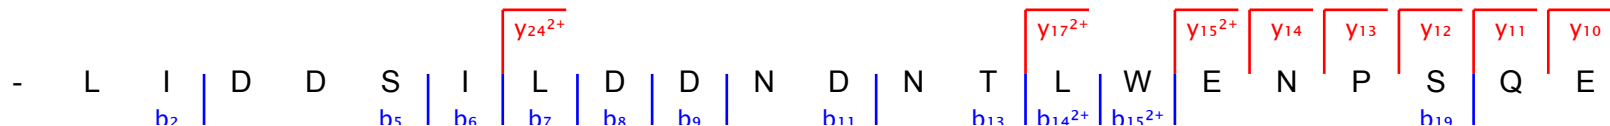

Raw file

Scan

Method

Score

m/z

Gene names

20150306\_yeast1\_Top\_opt\_2ug\_C1\_01\_1663

68892

TOF; CID

94.69

683.37

URM1

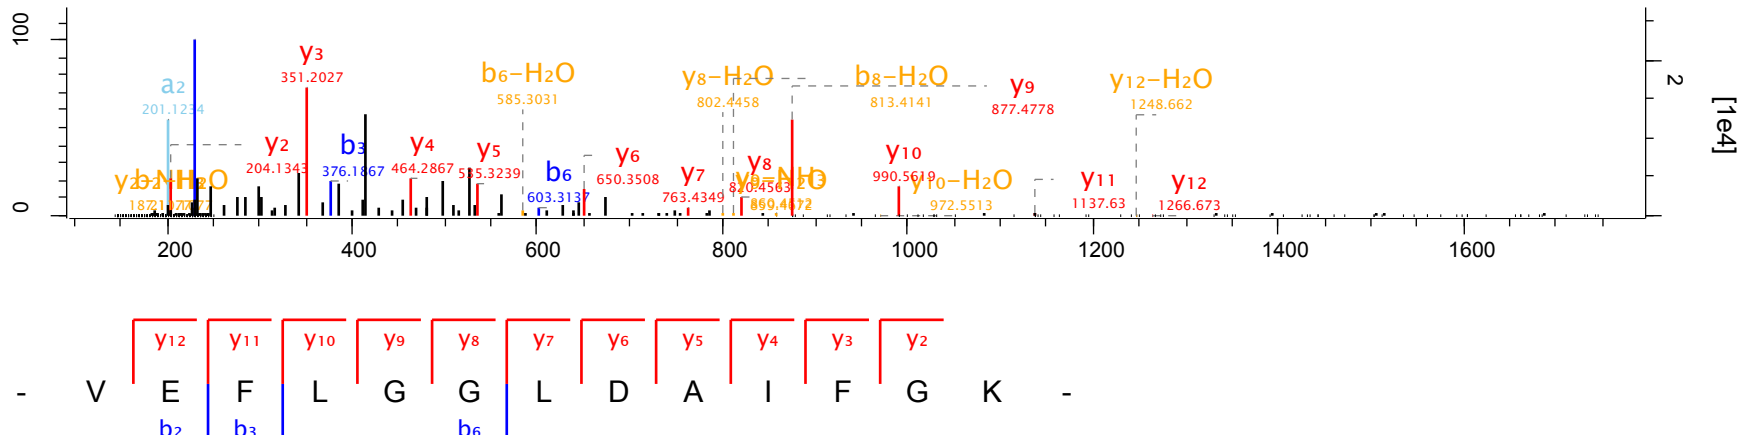

Raw file

Scan

Method

Score

m/z

Gene names

20150306\_yeast1\_Top\_opt\_2ug\_C1\_01\_1663

70540

TOF; CID

44.24

765.4

BET5

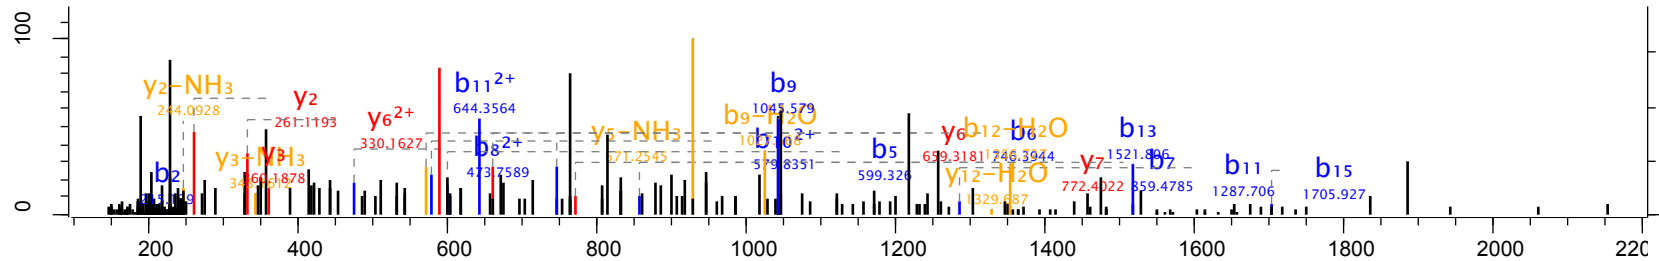

- I T N R N F I S V L E S F L A P M V N Q -

b<sub>2</sub> | b<sub>5</sub> | b<sub>6</sub> | b<sub>7</sub> | b<sub>8</sub><sup>2+</sup> | b<sub>9</sub> | b<sub>10</sub><sup>2+</sup> | b<sub>11</sub> | b<sub>13</sub> | b<sub>15</sub>

y<sub>7</sub> | y<sub>6</sub> | y<sub>5</sub> | y<sub>3</sub> | y<sub>2</sub>

Raw file

20150306\_yeast1\_Top\_opt\_2ug\_C1\_01\_1663

Scan

70690

Method

TOF; CID

Score

148.52

m/z

836.45

Gene names

YPR114W

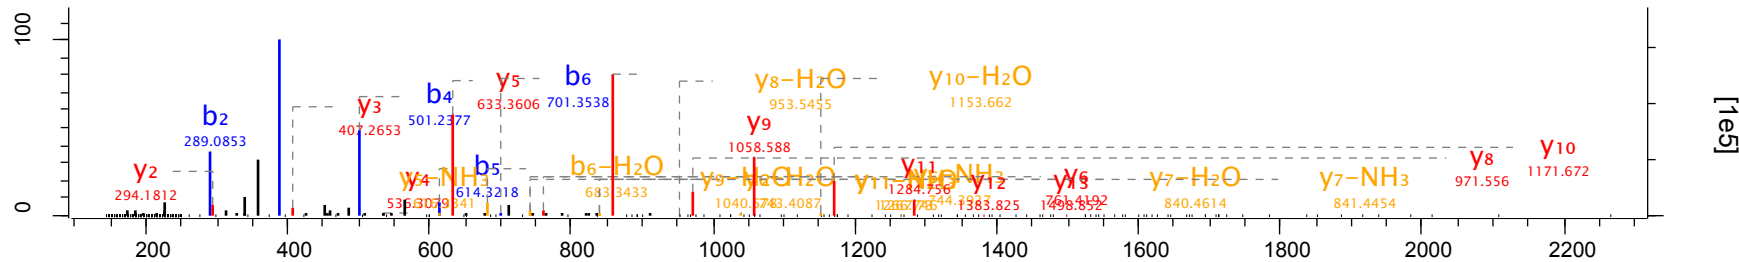

ac

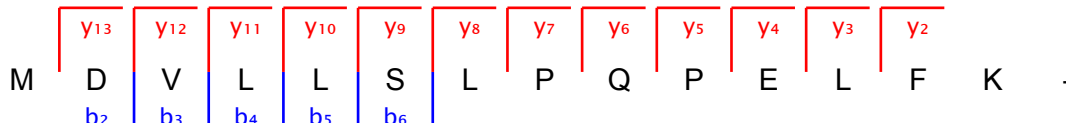



Raw file

Scan

Method

Score

m/z

Gene names

20150306\_yeast1\_Top\_opt\_2ug\_C1\_01\_1666

7540

TOF; CID

55.65

366.19

ELG1

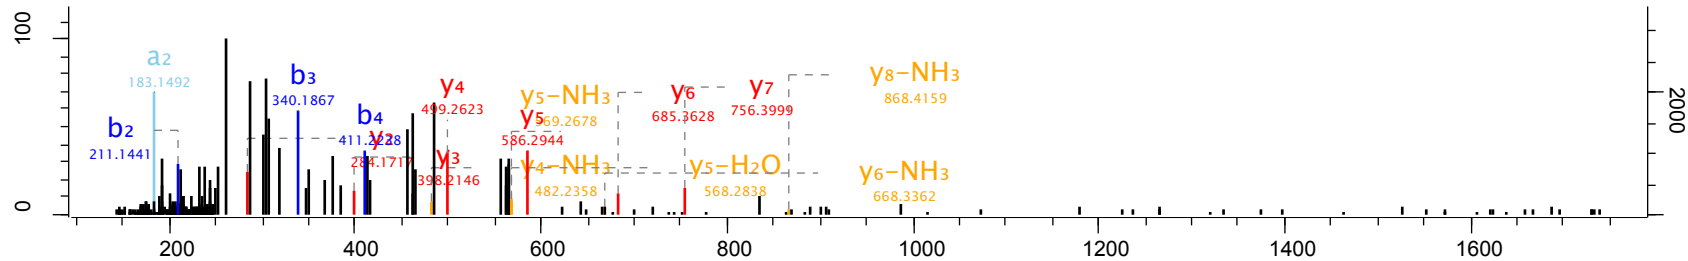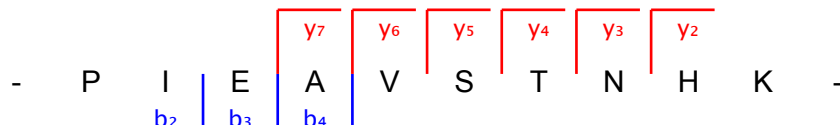

Raw file

Scan

Method

Score

m/z

Gene names

20150306\_yeast1\_Top\_opt\_2ug\_C1\_01\_1666

11210

TOF; CID

51.98

413.22

SKP2

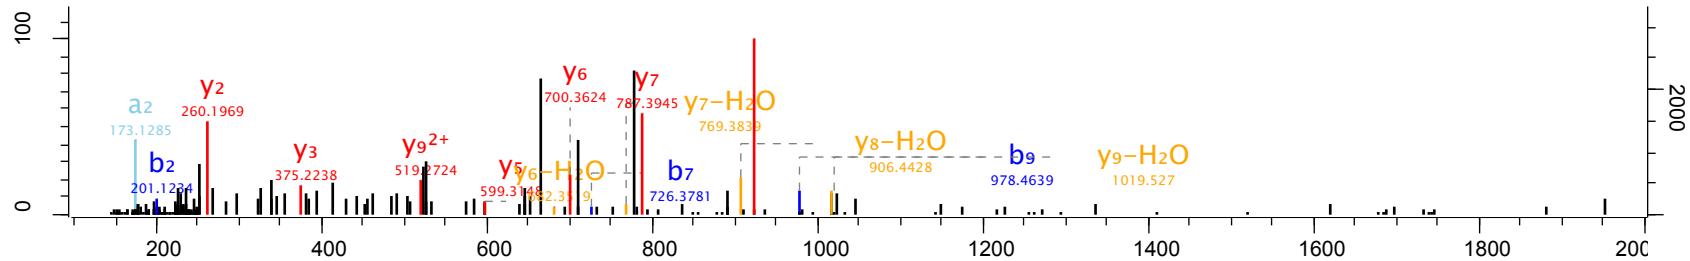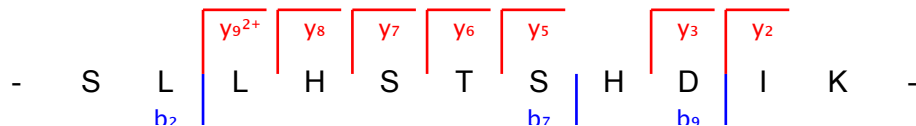

Raw file

Scan

Method

Score

m/z

Gene names

20150306\_yeast1\_Top\_opt\_2ug\_C1\_01\_1666

11887

TOF; CID

73.83

597.3

SAS3

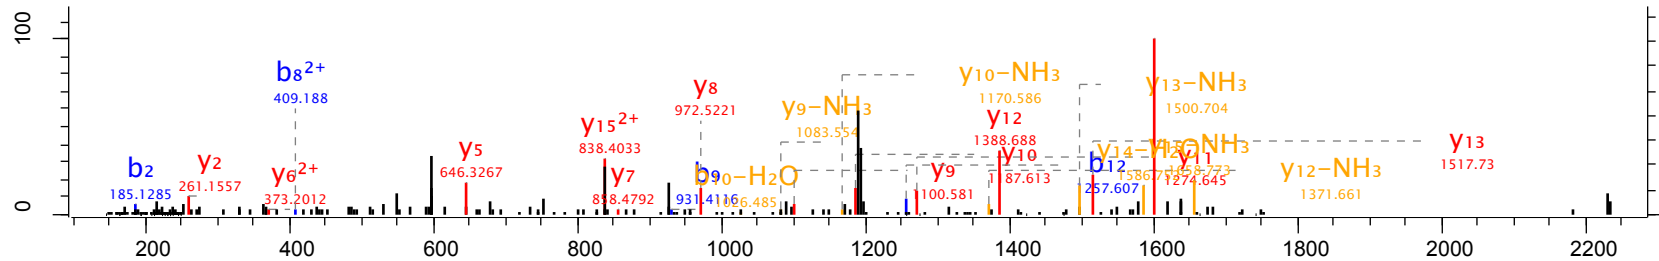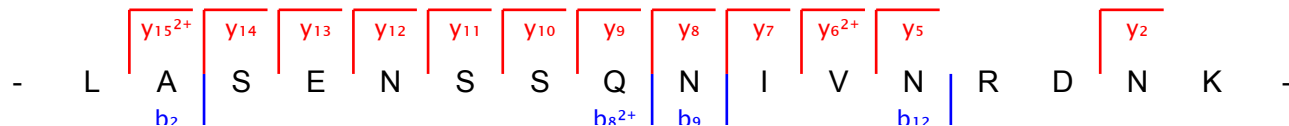

Raw file

Scan

Method

Score

m/z

Gene names

20150306\_yeast1\_Top\_opt\_2ug\_C1\_01\_1666

14259

TOF; CID

87.75

365.23

RPS28A;RPS28B

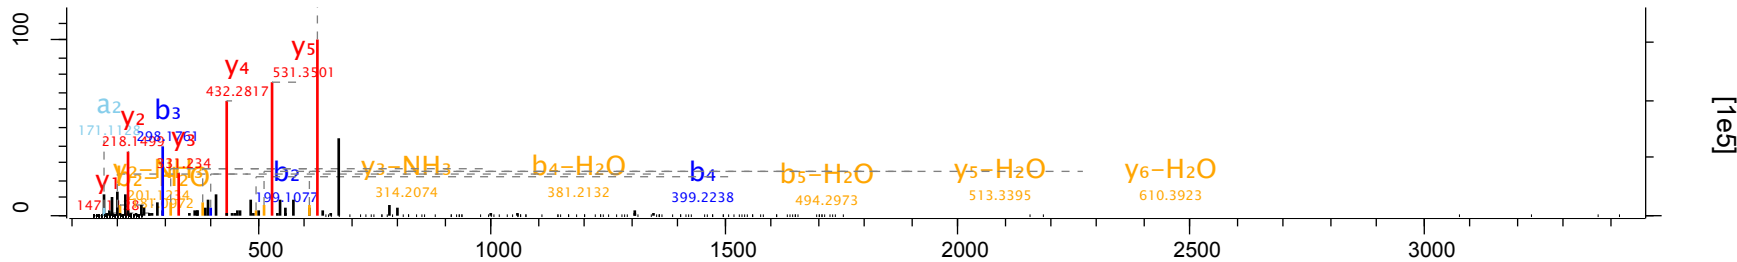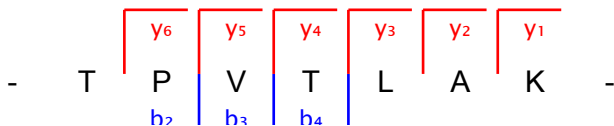

Raw file

20150306\_yeast1\_Top\_opt\_2ug\_C1\_01\_1666

Scan

14437

Method

TOF; CID

Score

112.83

m/z

543.3

Gene names

GPI14

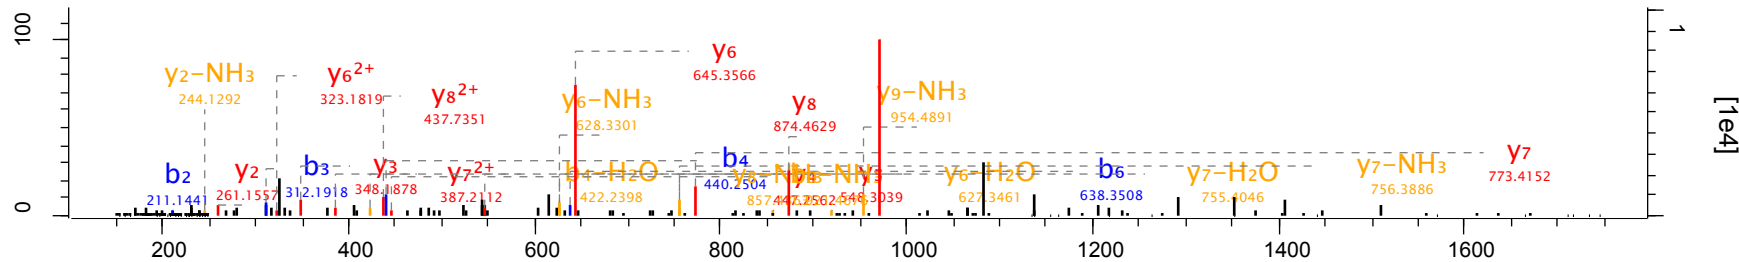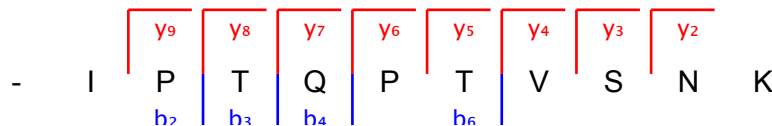

Raw file

Scan

Method

Score

m/z

Gene names

20150306\_yeast1\_Top\_opt\_2ug\_C1\_01\_1666

14735

TOF; CID

91.87

502.29

RAD10

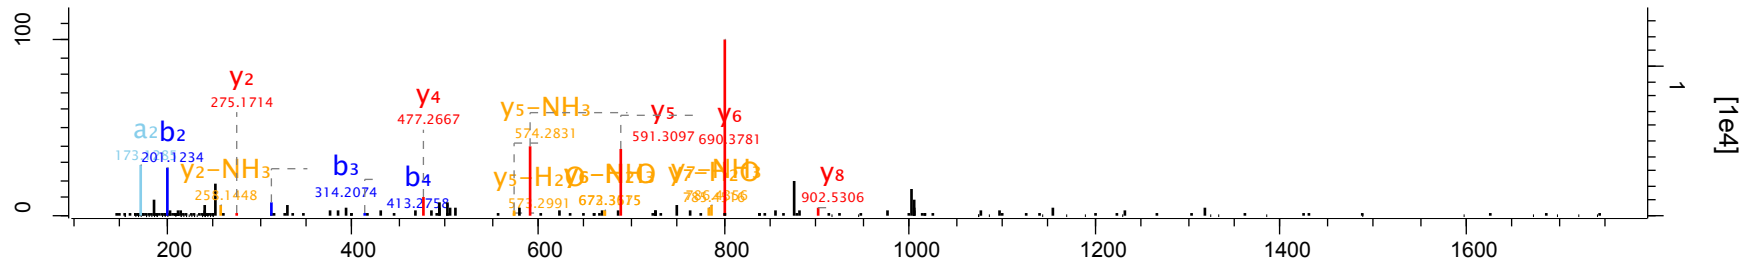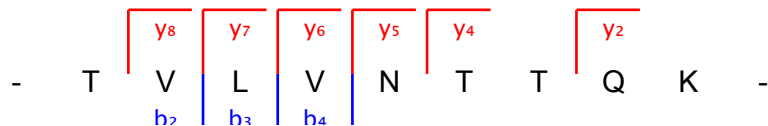

Raw file

Scan

Method

Score

m/z

Gene names

20150306\_yeast1\_Top\_opt\_2ug\_C1\_01\_1666

16495

TOF; CID

87.08

548.28

MRPS12

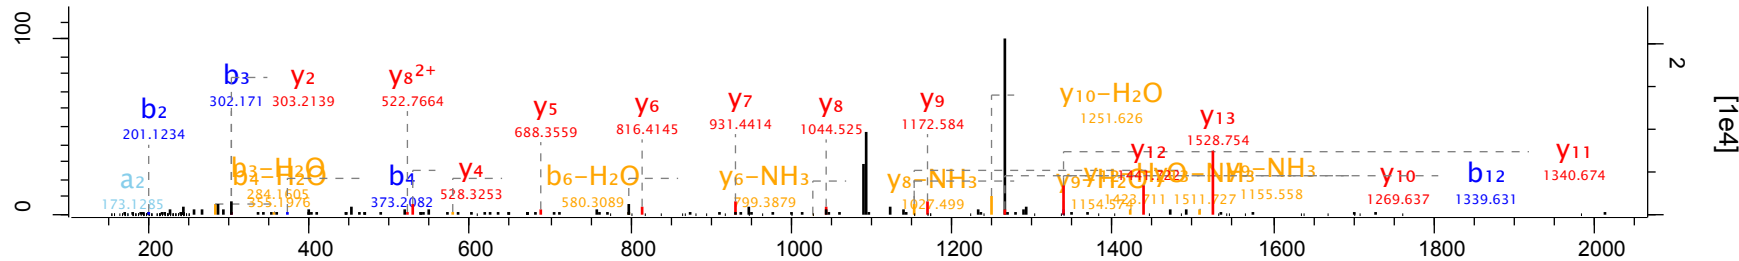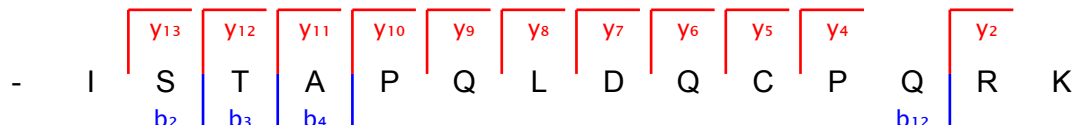

Raw file

20150306\_yeast1\_Top\_opt\_2ug\_C1\_01\_1666

Scan

19613

Method

TOF; CID

Score

194.67

m/z

856.89

Gene names

SHR3

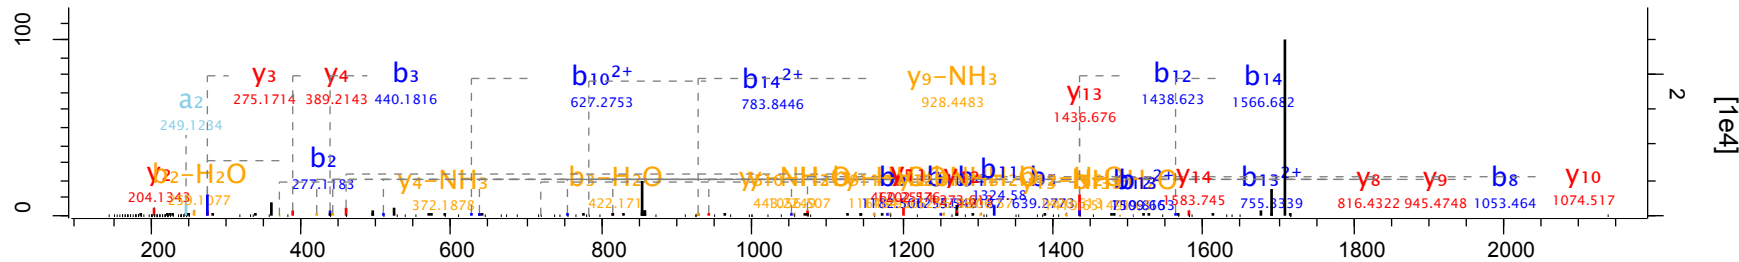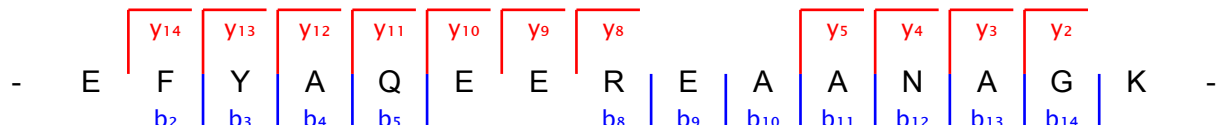



Raw file

Scan

Method

Score

m/z

Gene names

20150306\_yeast1\_Top\_opt\_2ug\_C1\_01\_1666

19922

TOF; CID

90.7

663.84

CDC15

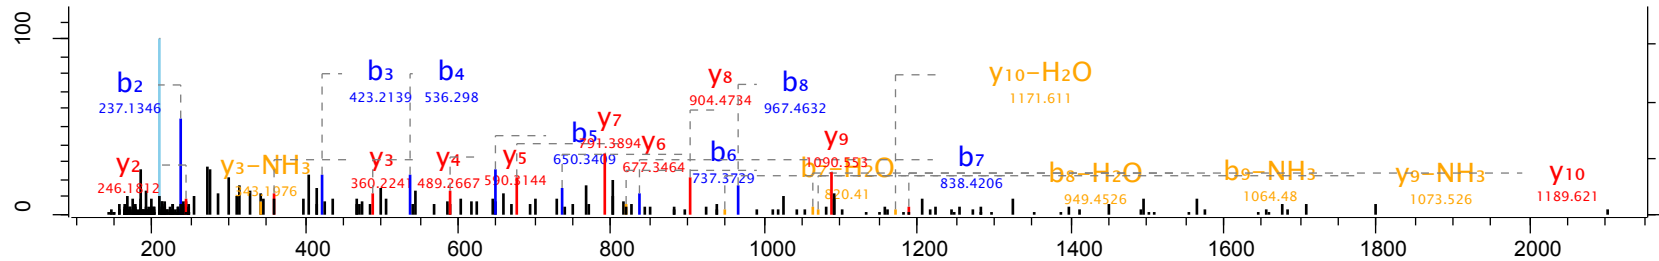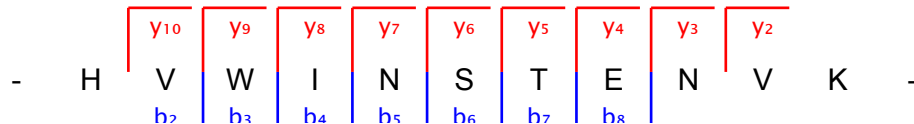

Raw file

20150306\_yeast1\_Top\_opt\_2ug\_C1\_01\_1666

Scan

25398

Method

TOF; CID

Score

75.35

m/z

789.03

Gene names

YNL162W-A

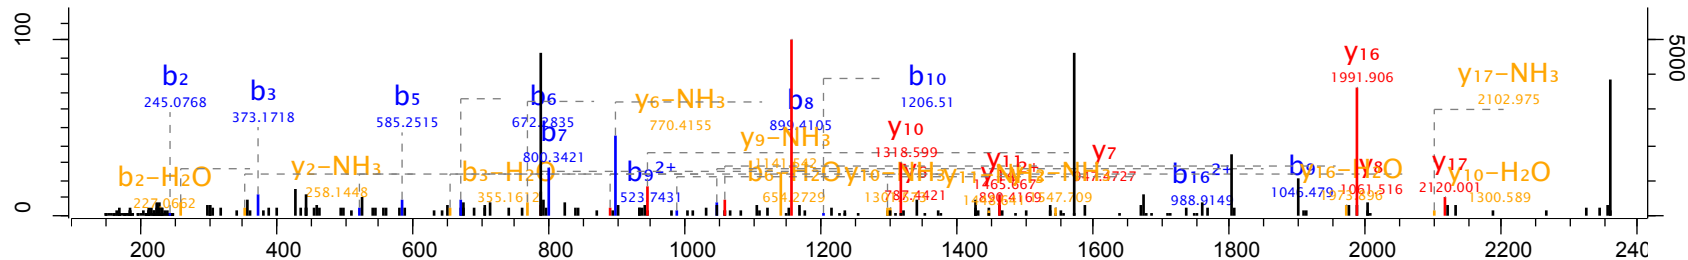

ac

- S D K P D S Q V F C P N C N E R L Q K -

b<sub>2</sub> b<sub>3</sub> y<sub>17</sub> y<sub>16</sub> b<sub>5</sub> y<sub>14</sub><sup>2+</sup> b<sub>6</sub> b<sub>7</sub> b<sub>8</sub> y<sub>11</sub> y<sub>10</sub> y<sub>9</sub> y<sub>8</sub> y<sub>7</sub> y<sub>6</sub> b<sub>16</sub><sup>2+</sup>

Raw file

Scan

Method

Score

m/z

Gene names

20150306\_yeast1\_Top\_opt\_2ug\_C1\_01\_1666

27340

TOF; CID

81.66

812.87

HLR1

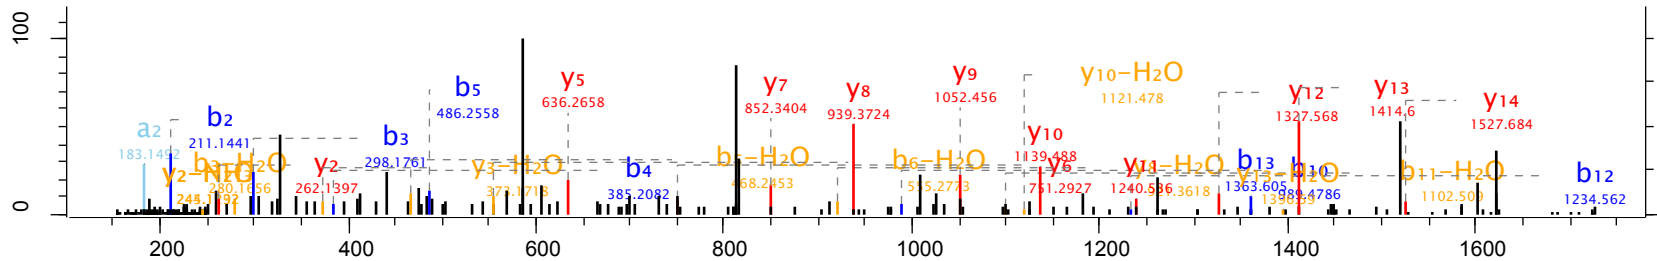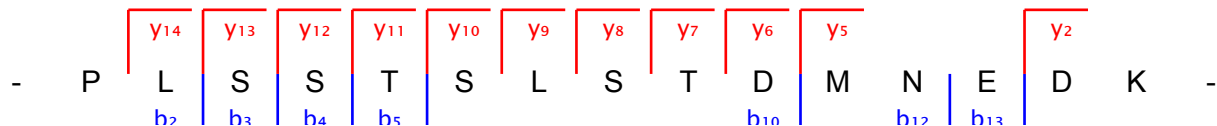

Raw file

20150306\_yeast1\_Top\_opt\_2ug\_C1\_01\_1666

Scan

29042

Method

TOF; CID

Score

57.53

m/z

536.8

Gene names

IML3

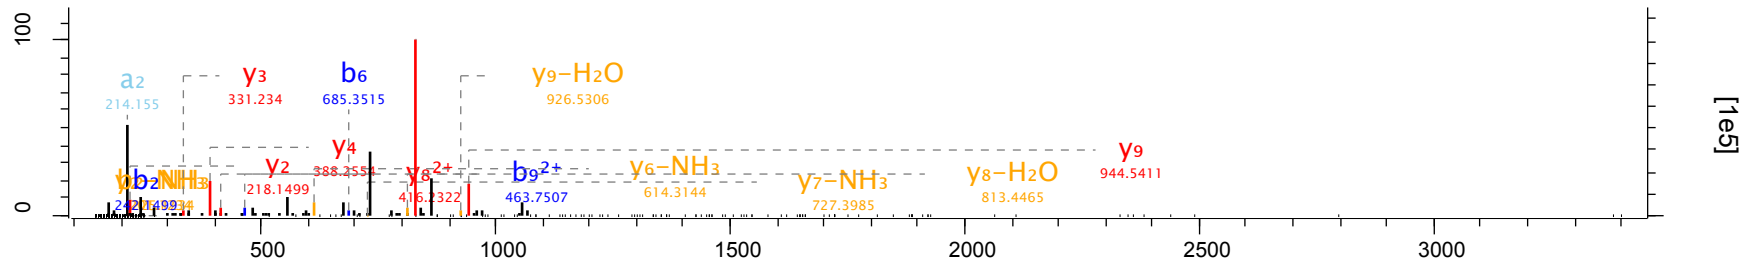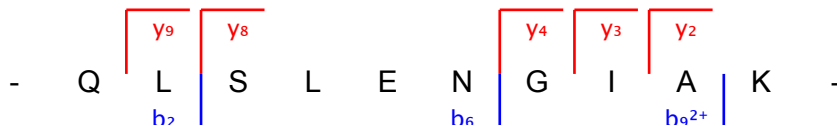

Raw file

Scan

Method

Score

m/z

Gene names

20150306\_yeast1\_Top\_opt\_2ug\_C1\_01\_1666

33494

TOF; CID

35.74

773.36

PPG1

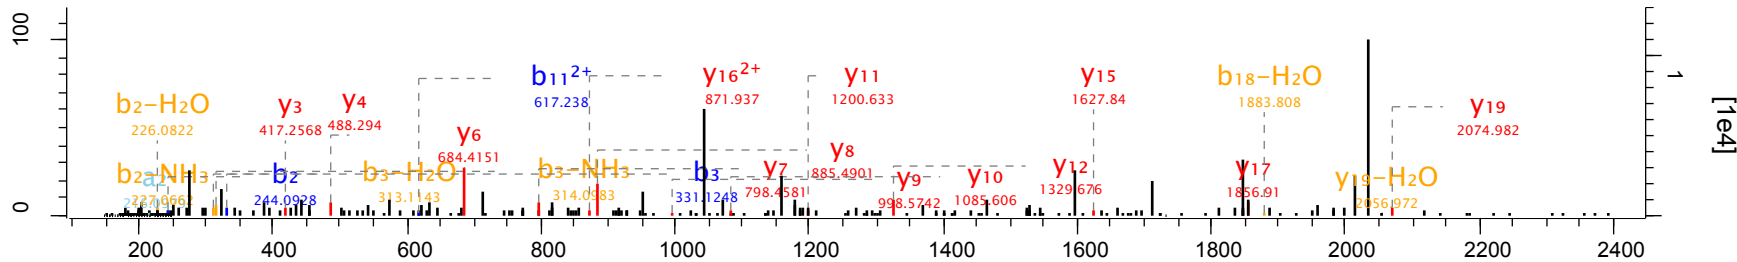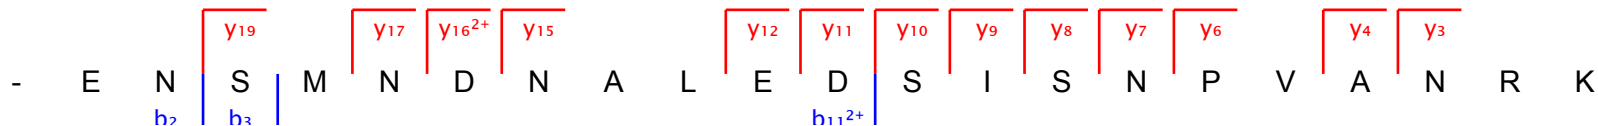

Raw file

Scan

Method

Score

m/z

Gene names

20150306\_yeast1\_Top\_opt\_2ug\_C1\_01\_1666

33787

TOF; CID

81.3

467.27

TCA17

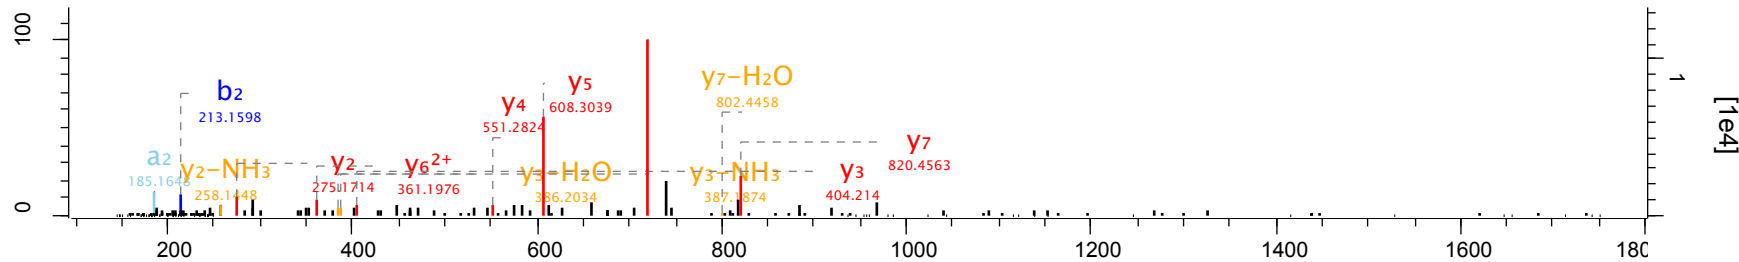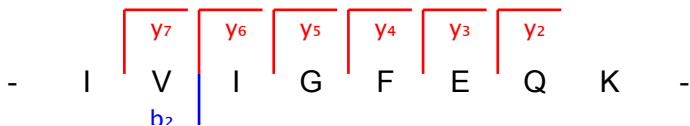

Raw file

Scan

Method

Score

m/z

Gene names

20150306\_yeast1\_Top\_opt\_2ug\_C1\_01\_1666

34607

TOF; CID

97.69

535.62

AIF1

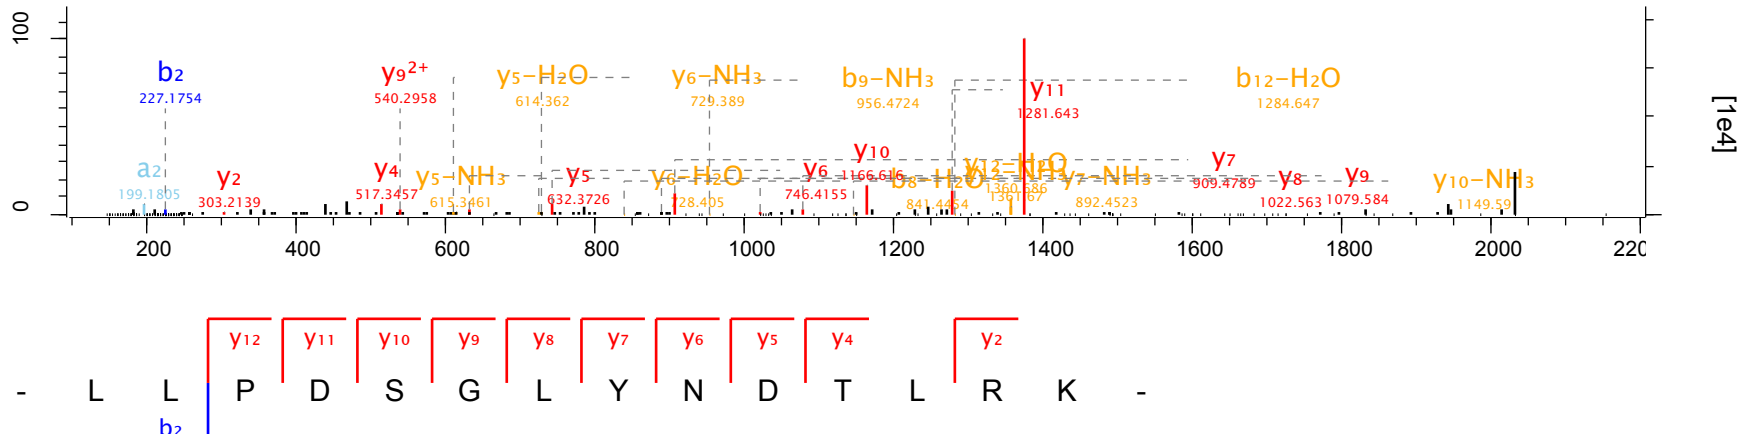

Raw file

Scan

Method

Score

m/z

Gene names

20150306\_yeast1\_Top\_opt\_2ug\_C1\_01\_1666

40015

TOF; CID

63.57

488.28

IRC10

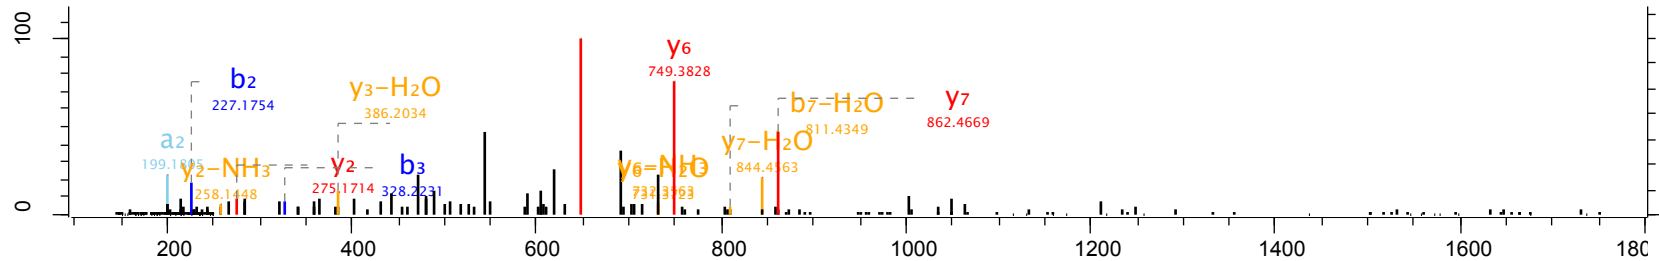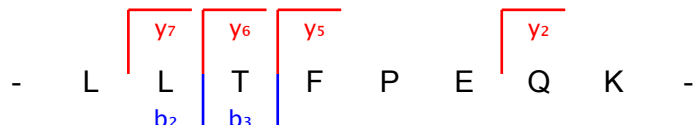



Raw file

20150306\_yeast1\_Top\_opt\_2ug\_C1\_01\_1666

Scan

40948

Method

TOF; CID

Score

50.09

m/z

760.36

Gene names

MCM10

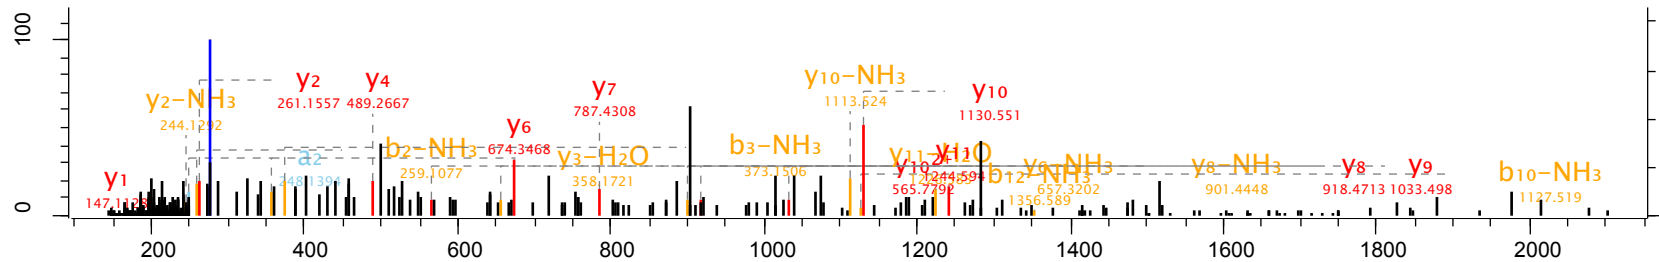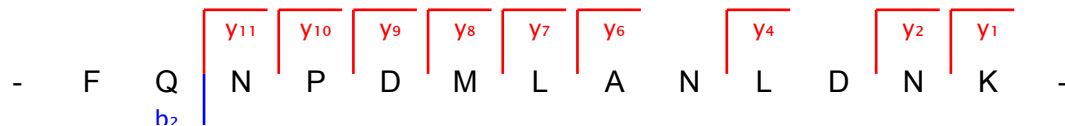

Raw file

Scan

Method

Score

m/z

Gene names

20150306\_yeast1\_Top\_opt\_2ug\_C1\_01\_1666

43177

TOF; CID

129.42

518.79

TRS20

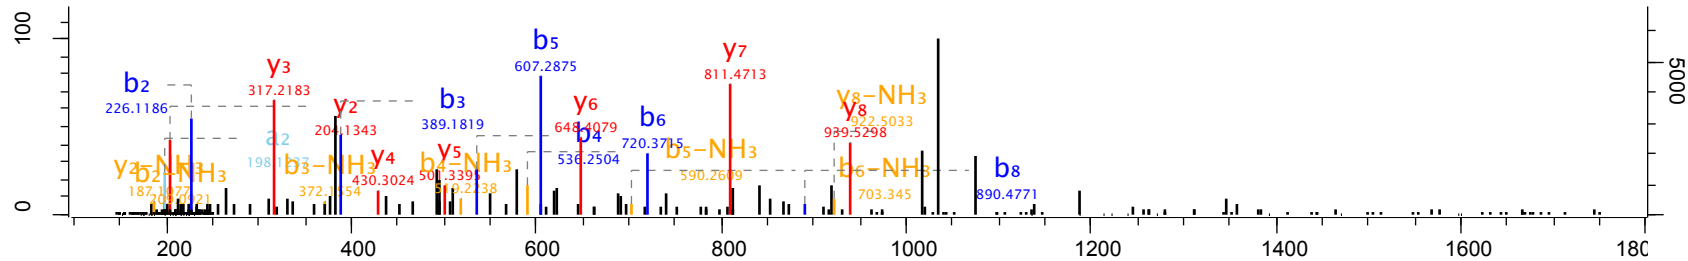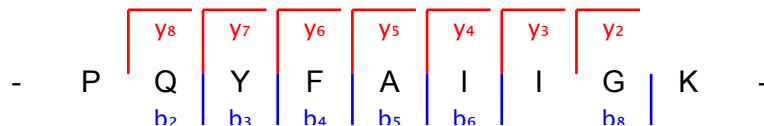

Raw file

Scan

Method

Score

m/z

Gene names

20150306\_yeast1\_Top\_opt\_2ug\_C1\_01\_1666

43962

TOF; CID

95.62

551.82

SNM1

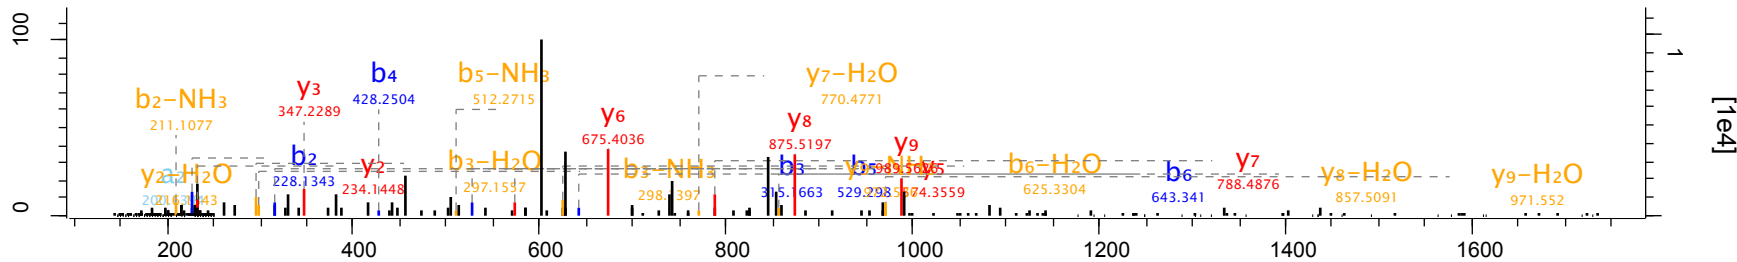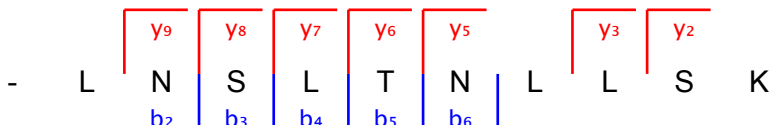

Raw file

Scan

Method

Score

m/z

Gene names

20150306\_yeast1\_Top\_opt\_2ug\_C1\_01\_1666

45083

TOF; CID

84.95

767.89

LOT5

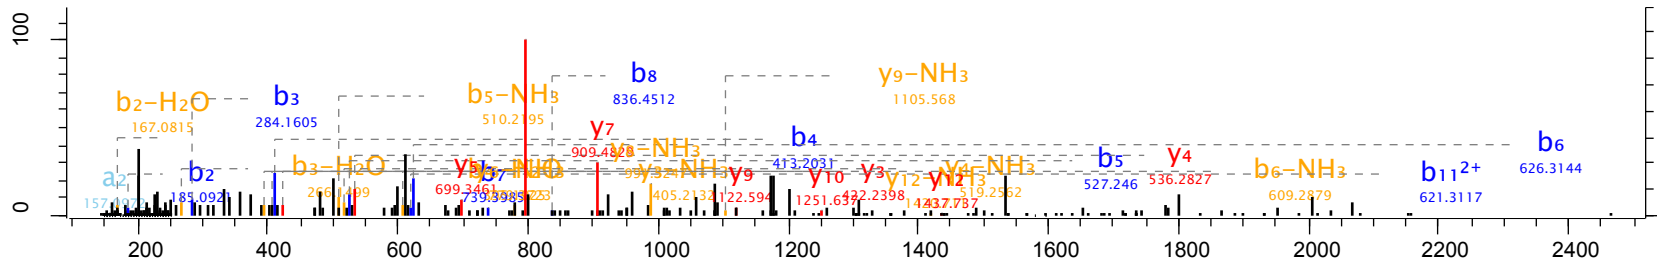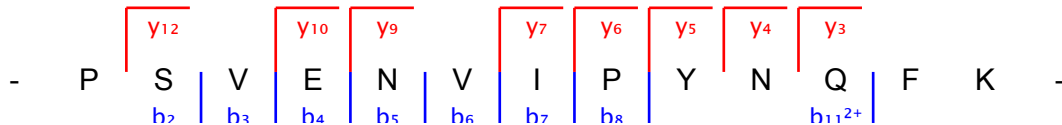

Raw file

Scan

Method

Score

m/z

Gene names

20150306\_yeast1\_Top\_opt\_2ug\_C1\_01\_1666

48637

TOF; CID

39.28

1004.49

ROG1

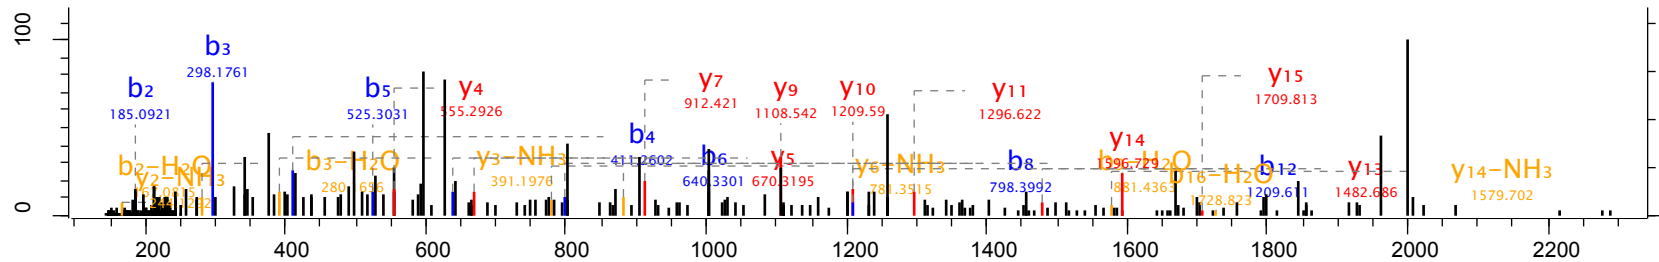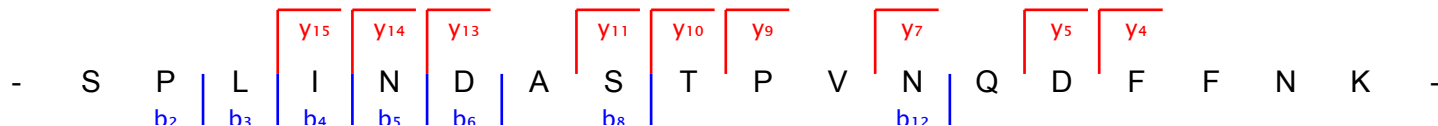

Raw file

Scan

Method

Score

m/z

Gene names

20150306\_yeast1\_Top\_opt\_2ug\_C1\_01\_1666

49617

TOF; CID

79.15

568.32

NCE101

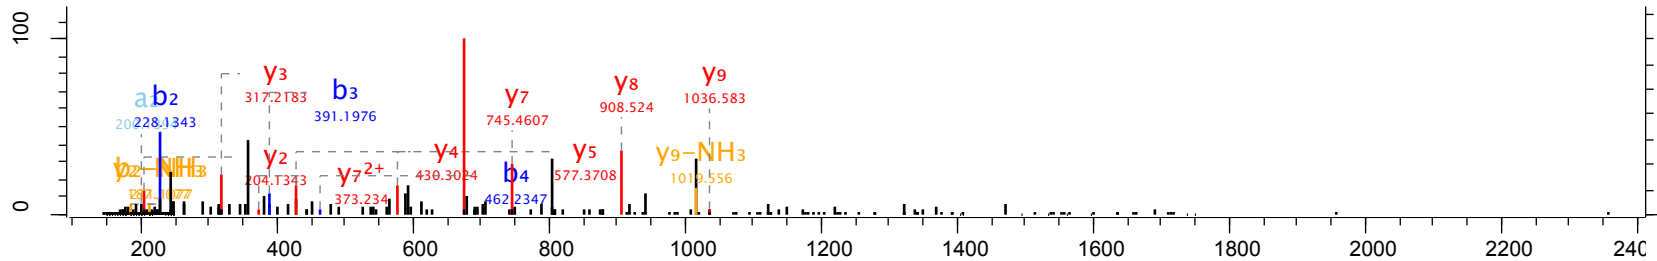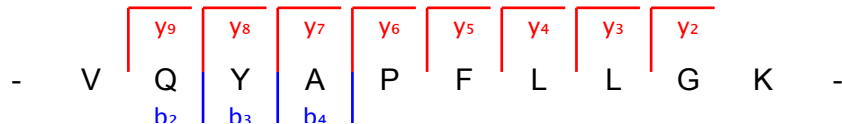

Raw file

Scan

Method

Score

m/z

Gene names

20150306\_yeast1\_Top\_opt\_2ug\_C1\_01\_1666

53337

TOF; CID

74.39

704.38

CPT1

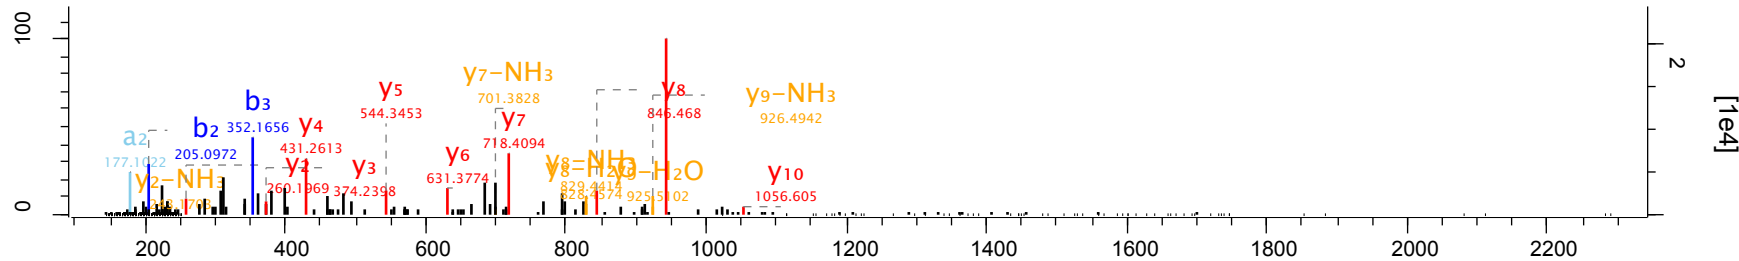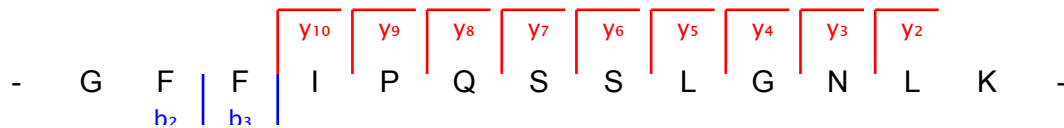

Raw file

20150306\_yeast1\_Top\_opt\_2ug\_C1\_01\_1666

Scan

54847

Method

TOF; CID

Score

106.93

m/z

669.36

Gene names

YPR010C-A

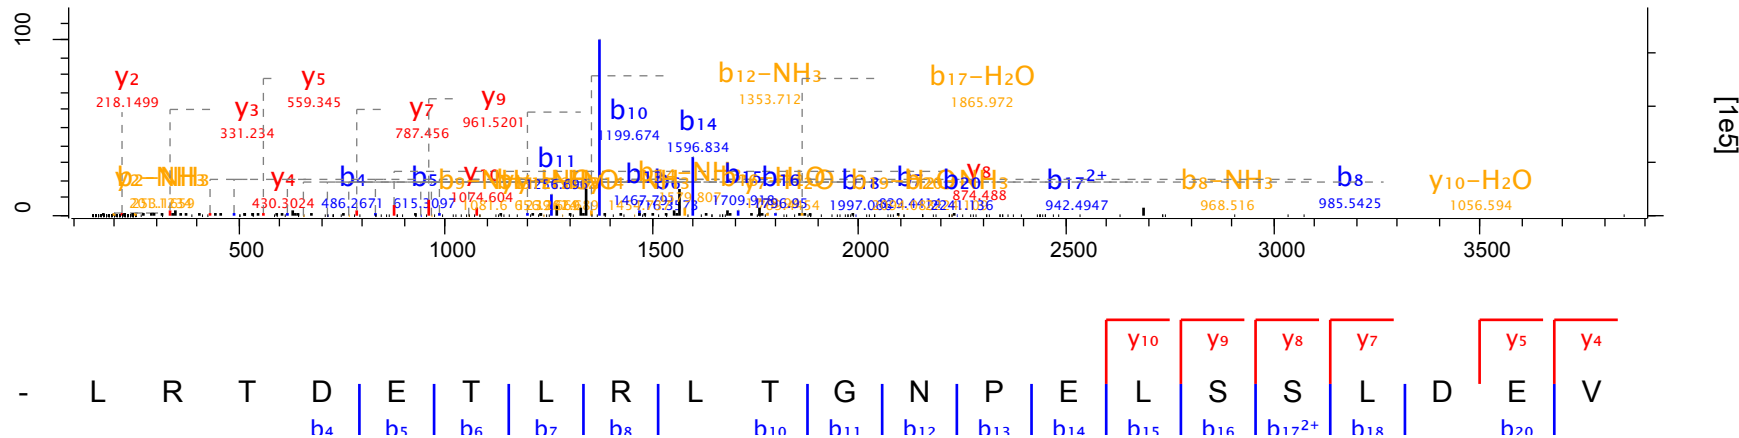



Raw file

20150306\_yeast1\_Top\_opt\_2ug\_C1\_01\_1666

Scan

57513

Method

TOF; CID

Score

247.35

m/z

804.13

Gene names

HTA2;HTA1

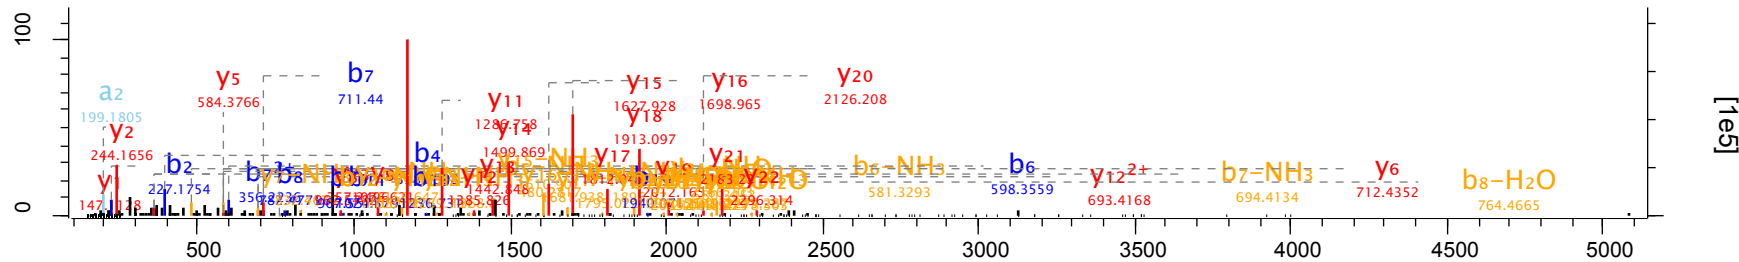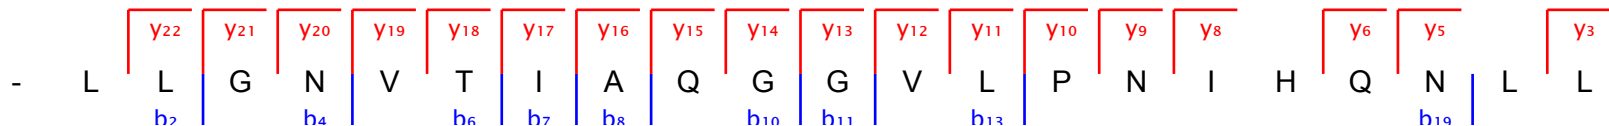

Raw file

Scan

Method

Score

m/z

Gene names

20150306\_yeast1\_Top\_opt\_2ug\_C1\_01\_1666

59239

TOF; CID

57.48

782.41

PRM4

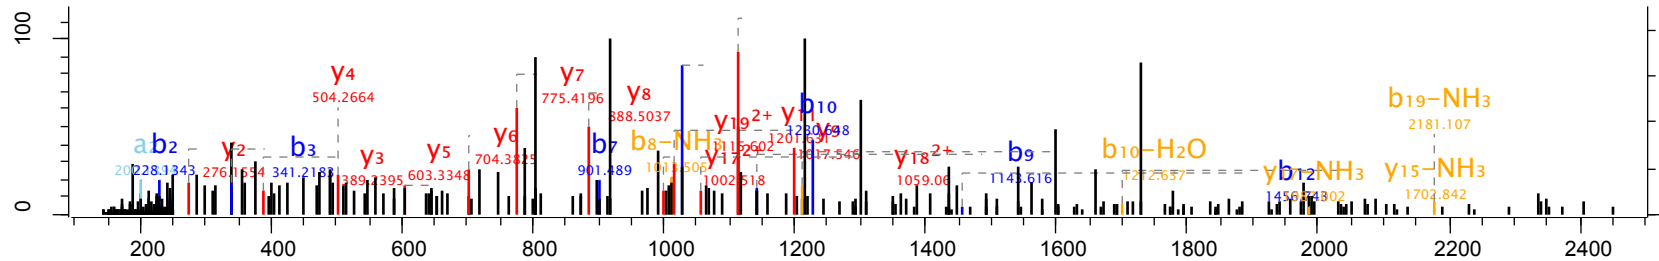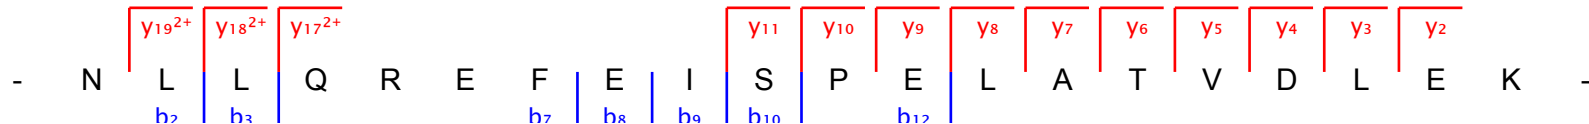

Raw file

20150306\_yeast1\_Top\_opt\_2ug\_C1\_01\_1666

Scan

69820

Method

TOF; CID

Score

50.9

m/z

729.89

Gene names

CWP2

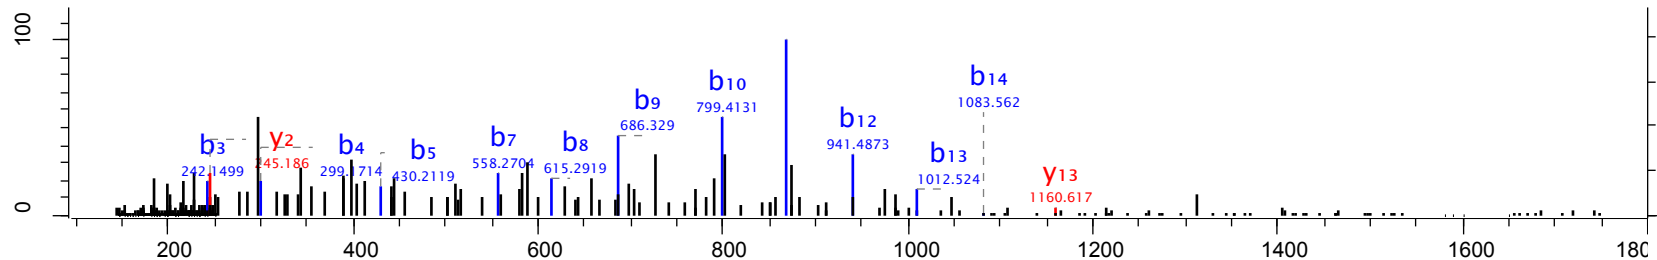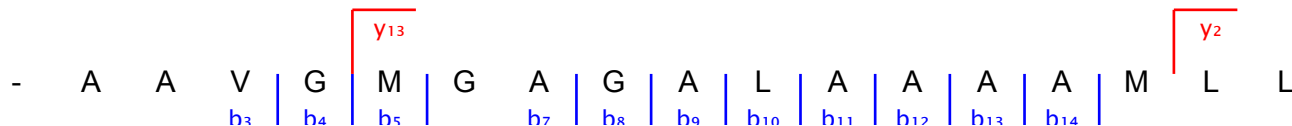

Raw file

Scan

Method

Score

m/z

Gene names

20150306\_yeast1\_Top\_opt\_2ug\_C1\_01\_1668

7721

TOF; CID

99

416.72

YDR090C

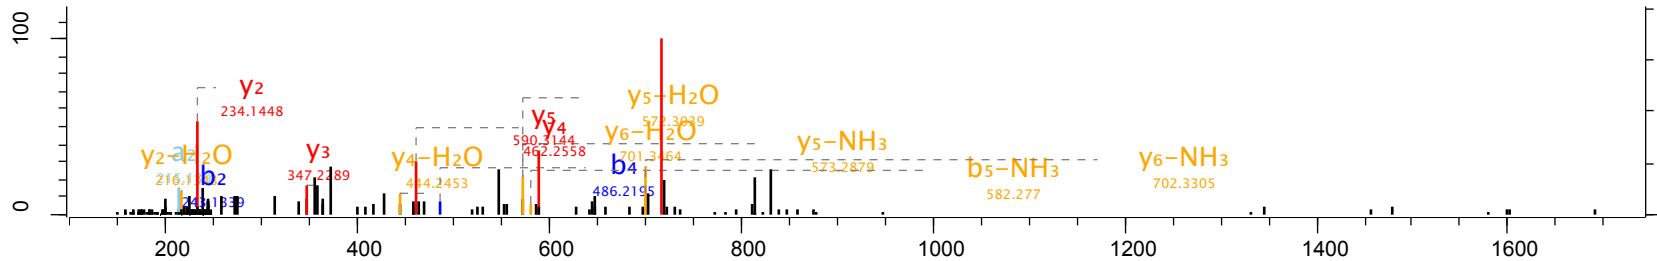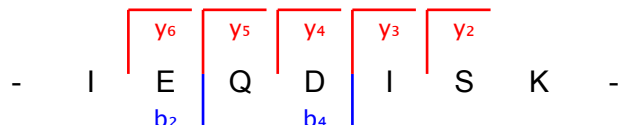

Raw file

Scan

Method

Score

m/z

20150306\_yeast1\_Top\_opt\_2ug\_C1\_01\_1668

8865

TOF; CID

71.61

540.25

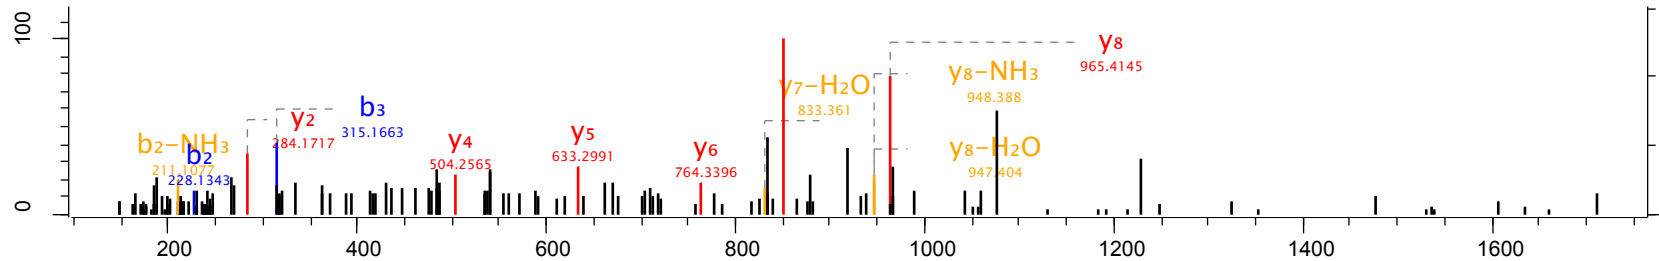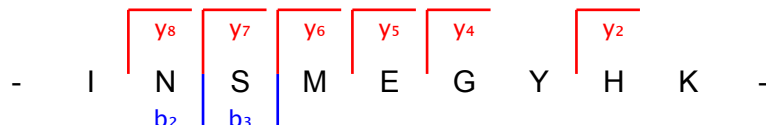

Raw file

Scan

Method

Score

m/z

Gene names

20150306\_yeast1\_Top\_opt\_2ug\_C1\_01\_1668

10378

TOF; CID

99.93

731.87

YLR326W

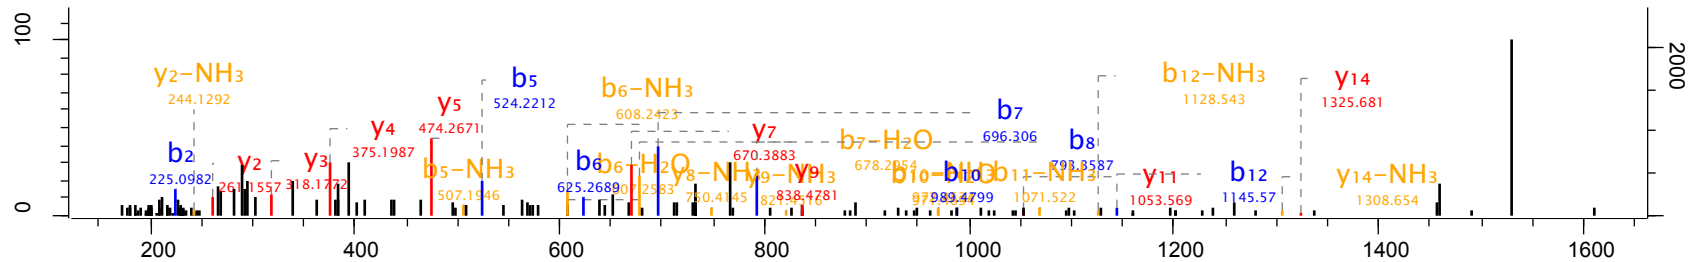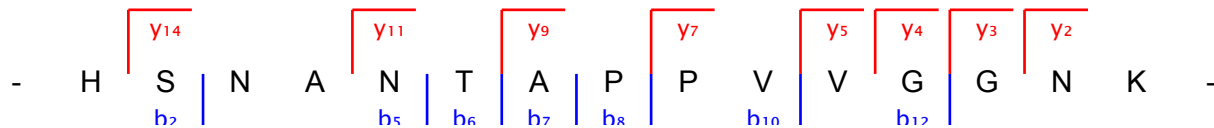

Raw file

Scan

Method

Score

m/z

Gene names

20150306\_yeast1\_Top\_opt\_2ug\_C1\_01\_1668

11018

TOF; CID

111.79

625.29

ATO3

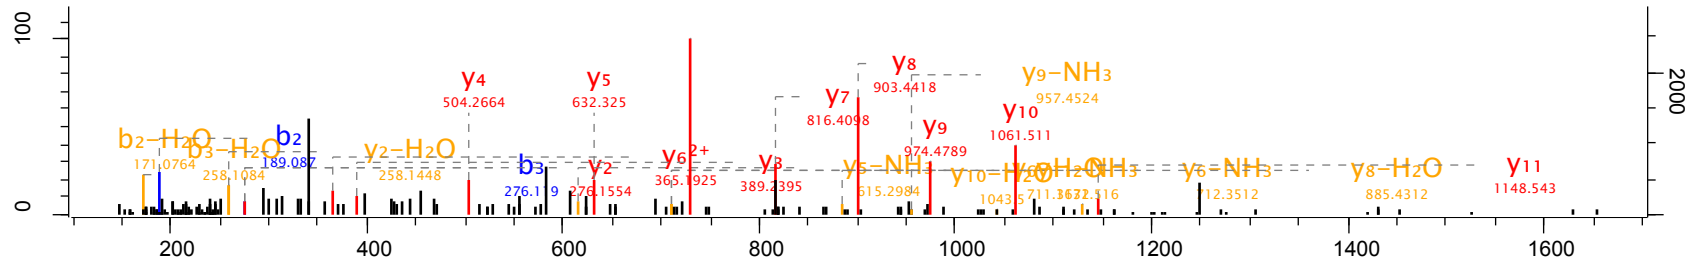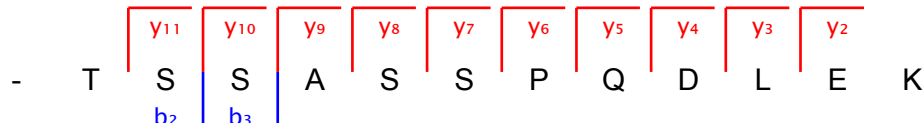

Raw file

Scan

Method

Score

m/z

Gene names

20150306\_yeast1\_Top\_opt\_2ug\_C1\_01\_1668

13685

TOF; CID

59.2

544.78

YER077C

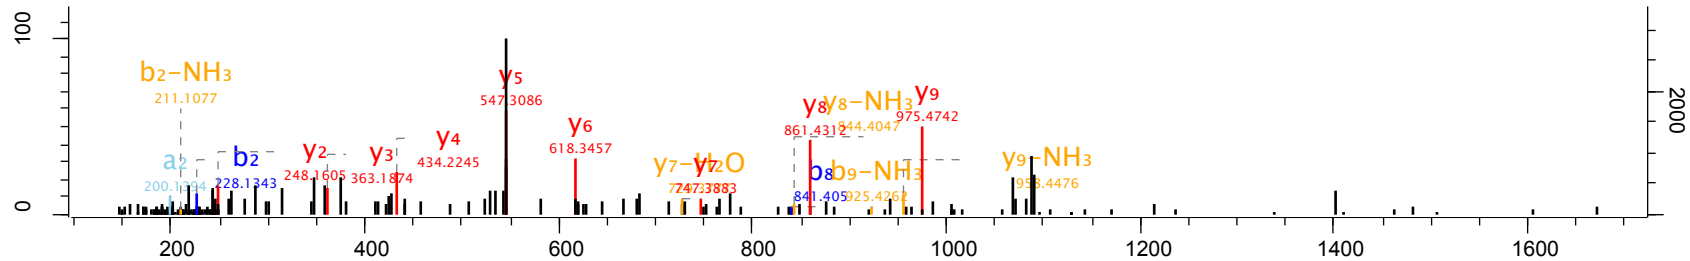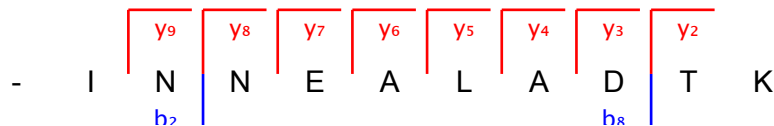



Raw file

Scan

Method

Score

m/z

Gene names

20150306\_yeast1\_Top\_opt\_2ug\_C1\_01\_1668

16047

TOF; CID

52.07

635.3

MIH1

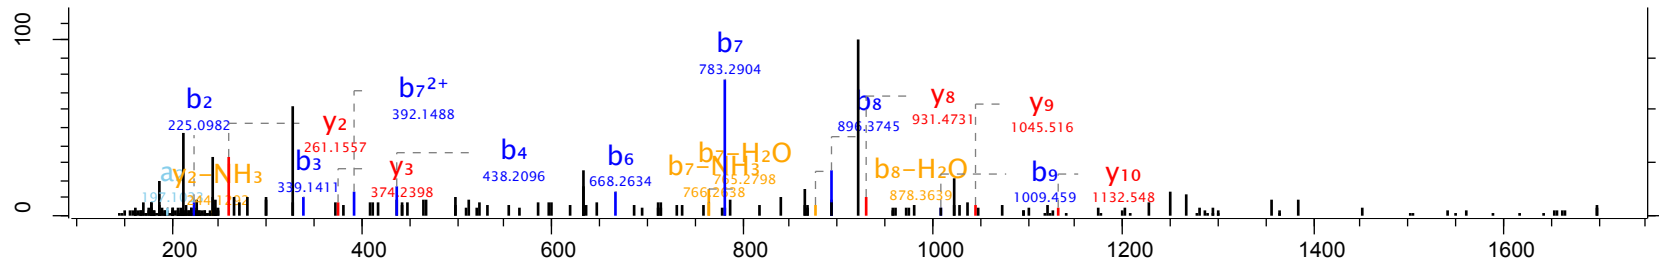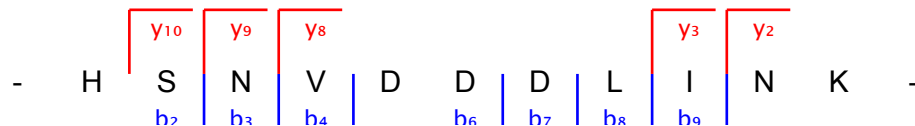

Raw file

Scan

Method

Score

m/z

Gene names

20150306\_yeast1\_Top\_opt\_2ug\_C1\_01\_1668

17218

TOF; CID

80.74

634.96

UBR2

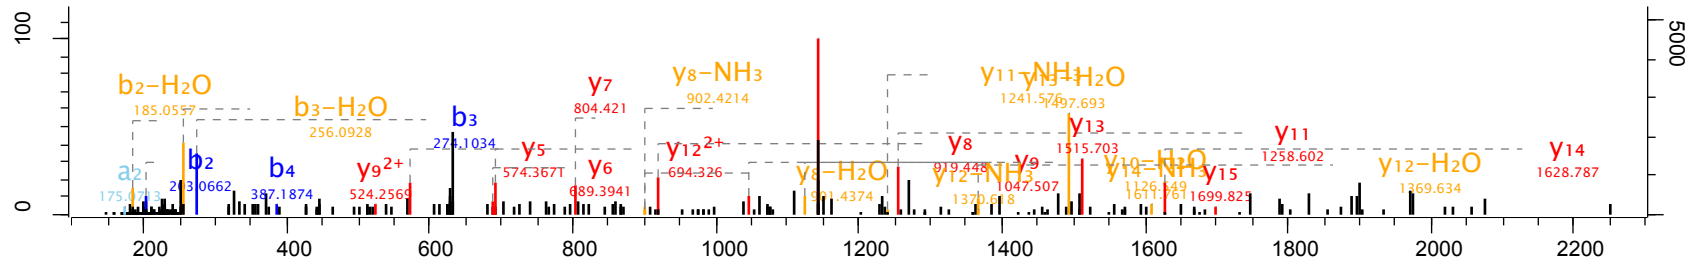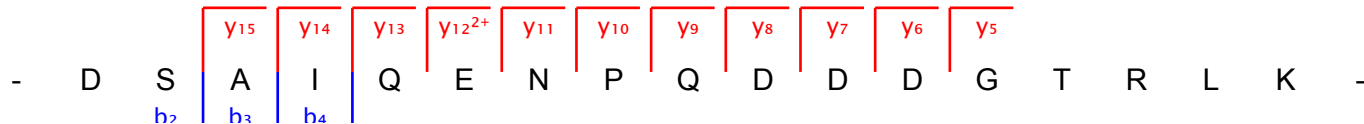

Raw file

Scan

Method

Score

m/z

Gene names

20150306\_yeast1\_Top\_opt\_2ug\_C1\_01\_1668

20171

TOF; CID

151.04

916.4

EOS1

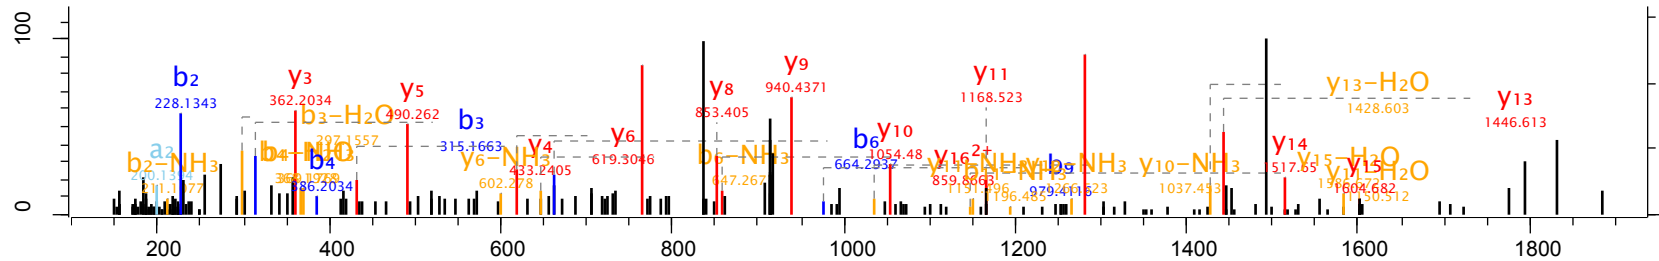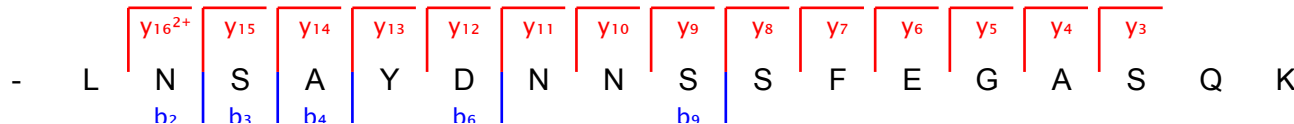

Raw file

Scan

Method

Score

m/z

Gene names

20150306\_yeast1\_Top\_opt\_2ug\_C1\_01\_1668

21002

TOF; CID

134.48

376.2

COX9

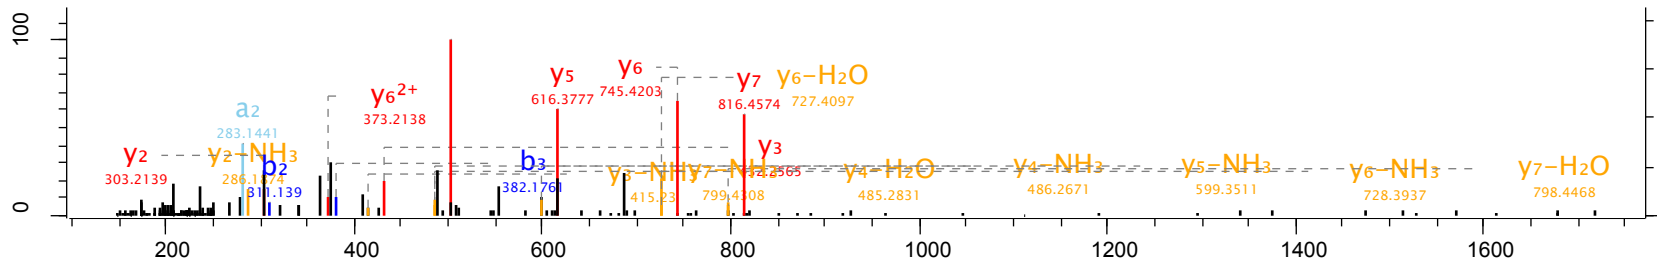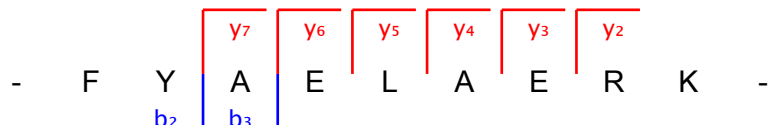

Raw file

Scan

Method

Score

m/z

Gene names

20150306\_yeast1\_Top\_opt\_2ug\_C1\_01\_1668

22326

TOF; CID

64.82

556.77

INP54

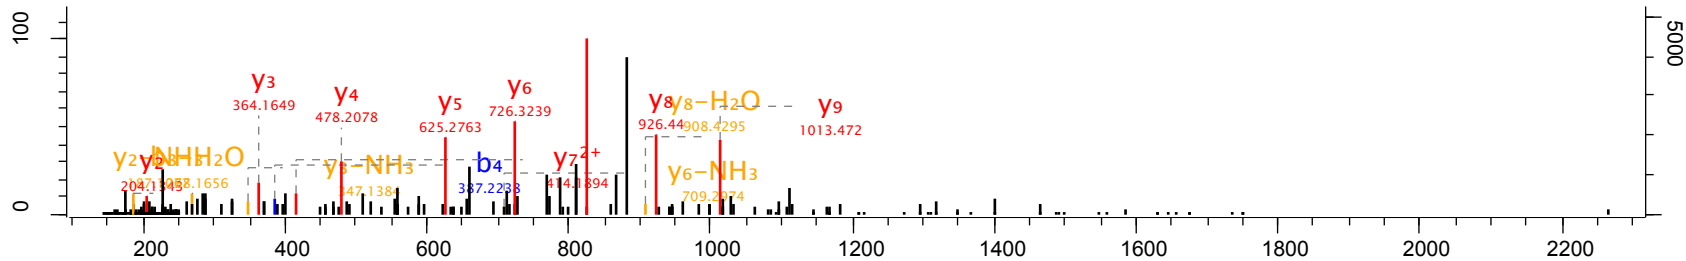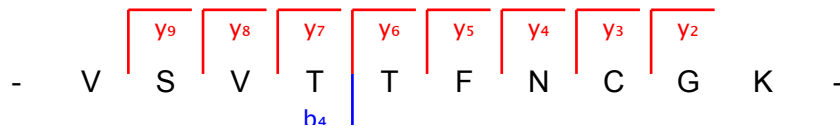

Raw file

Scan

Method

Score

m/z

Gene names

20150306\_yeast1\_Top\_opt\_2ug\_C1\_01\_1668

24645

TOF; CID

68.11

628.79

MRPL31

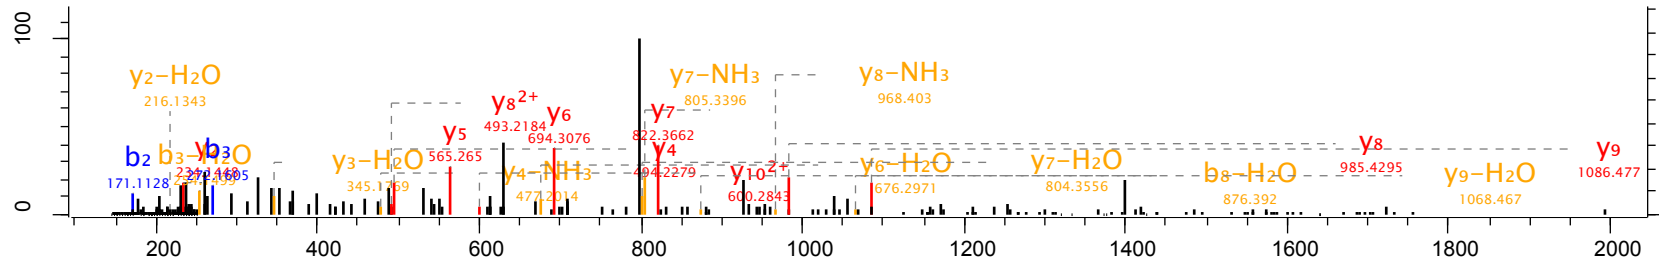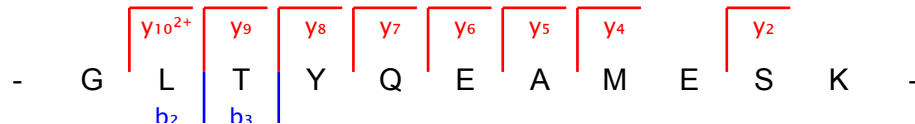

Raw file

20150306\_yeast1\_Top\_opt\_2ug\_C1\_01\_1668

Scan

24883

Method

TOF; CID

Score

52.9

m/z

685.34

Gene names

MCH1

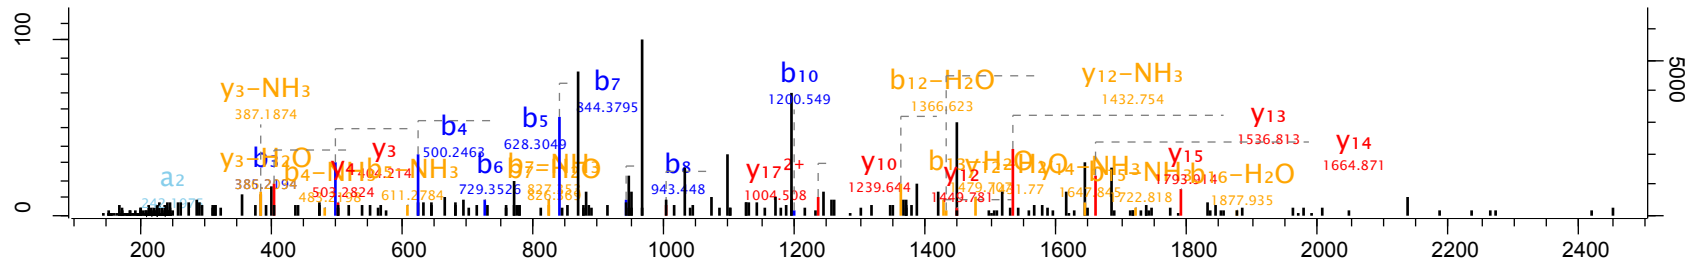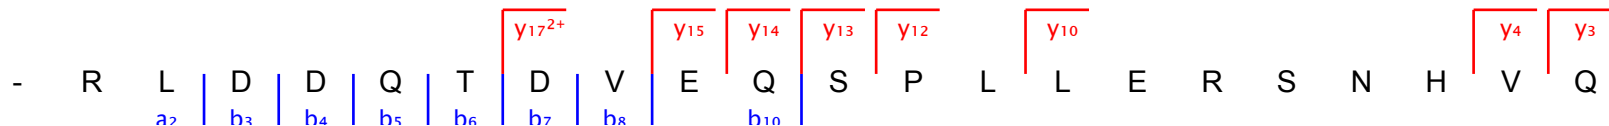

Raw file

Scan

Method

Score

m/z

Gene names

20150306\_yeast1\_Top\_opt\_2ug\_C1\_01\_1668

29201

TOF; CID

86.79

470.23

TIM22

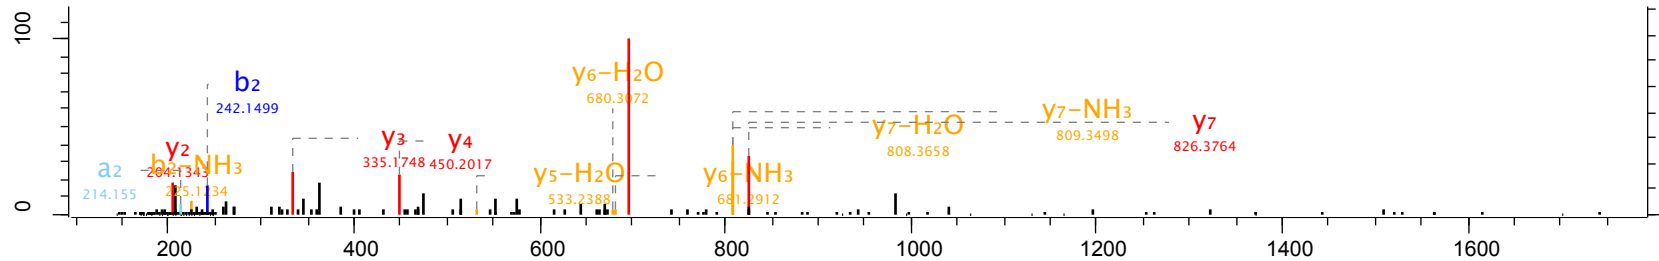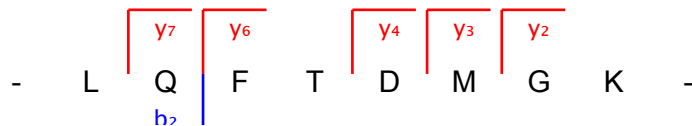



Raw file

Scan

Method

Score

m/z

Gene names

20150306\_yeast1\_Top\_opt\_2ug\_C1\_01\_1668

29235

TOF; CID

47.71

651.79

ERP6

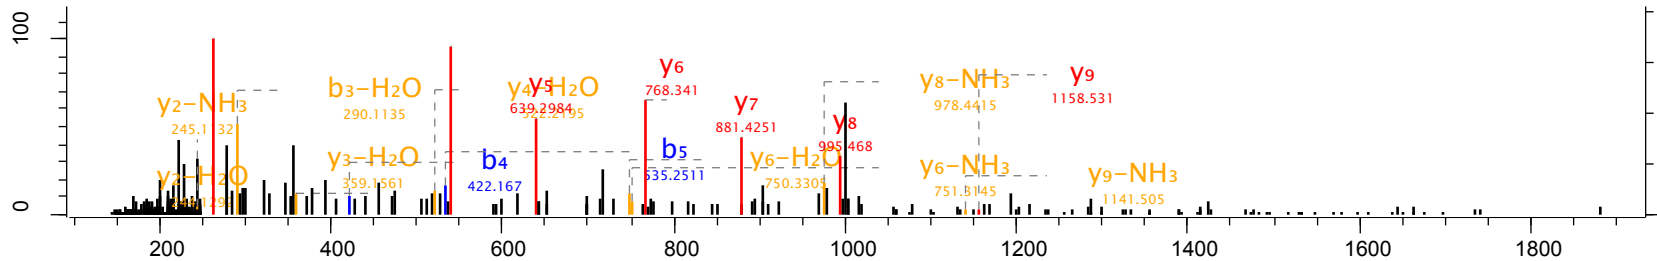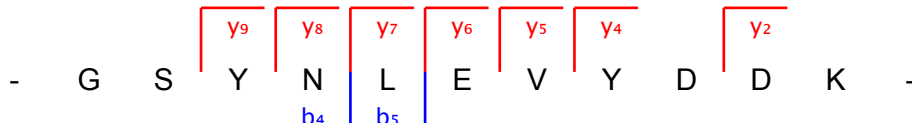

Raw file

Scan

Method

Score

m/z

Gene names

20150306\_yeast1\_Top\_opt\_2ug\_C1\_01\_1668

30483

TOF; CID

121.36

556.81

MAK31

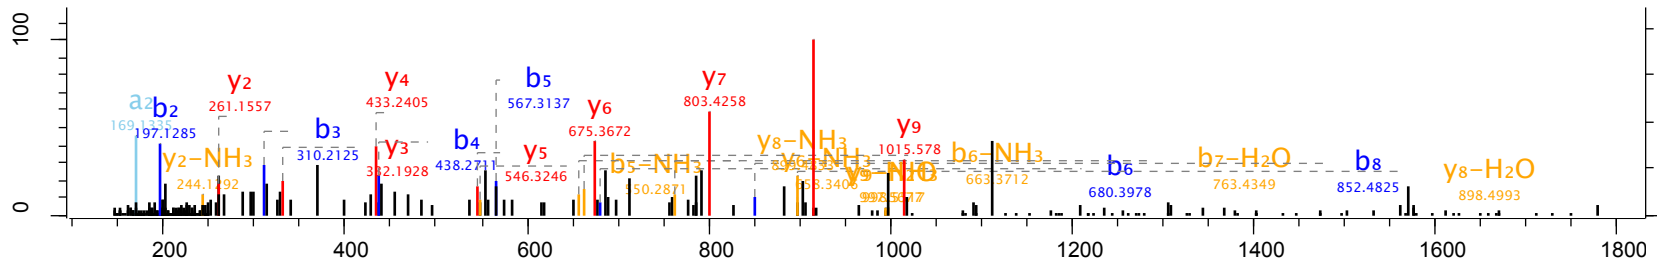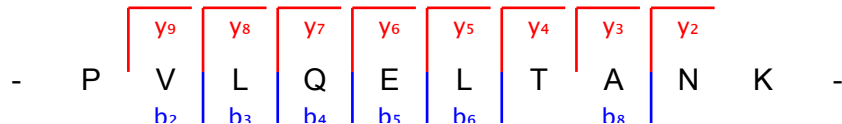

Raw file

20150306\_yeast1\_Top\_opt\_2ug\_C1\_01\_1668

Scan

30500

Method

TOF; CID

Score

79.94

m/z

793.38

Gene names

STP22

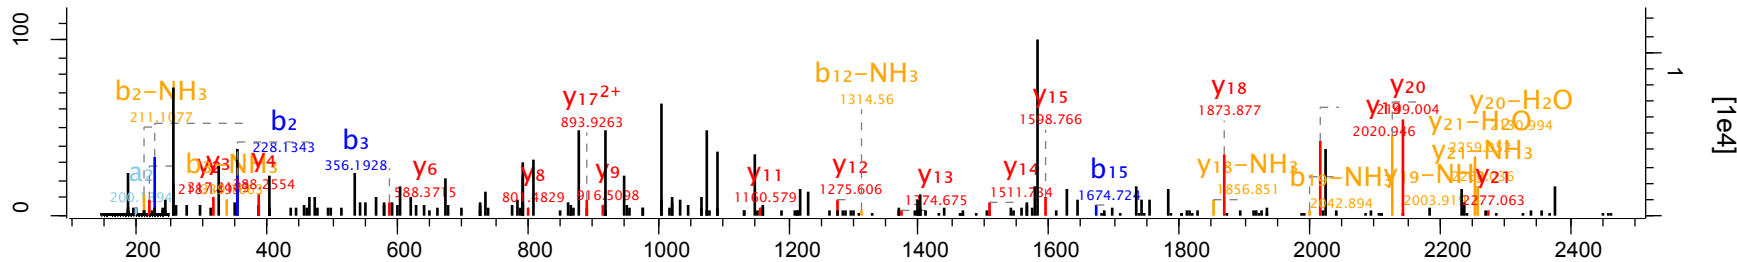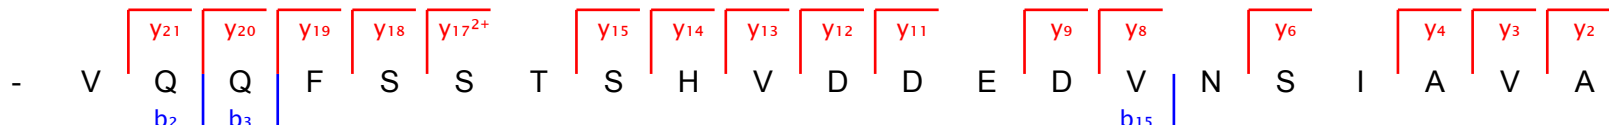

Raw file

Scan

Method

Score

m/z

Gene names

20150306\_yeast1\_Top\_opt\_2ug\_C1\_01\_1668

30642

TOF; CID

49.3

374.88

MET8

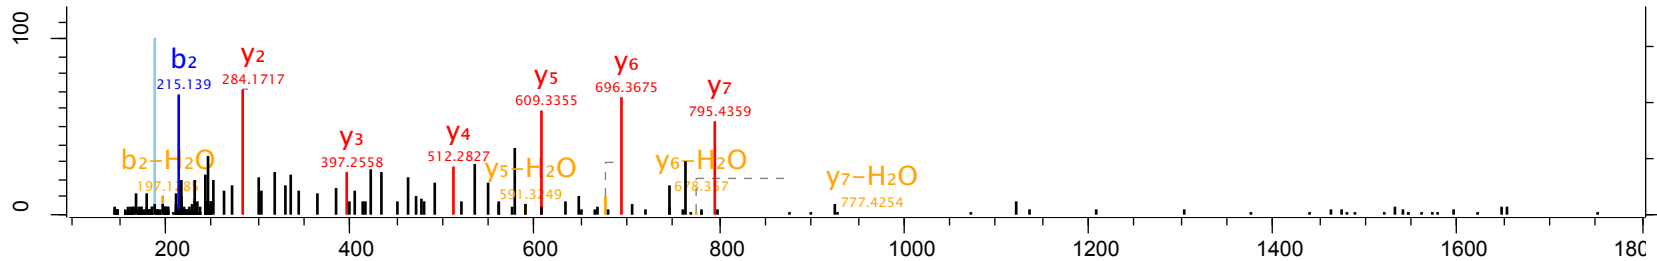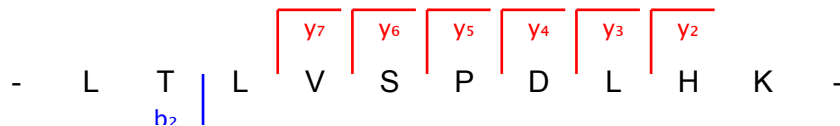

Raw file

Scan

Method

Score

m/z

Gene names

20150306\_yeast1\_Top\_opt\_2ug\_C1\_01\_1668

31556

TOF; CID

75.51

541.3

ASI3

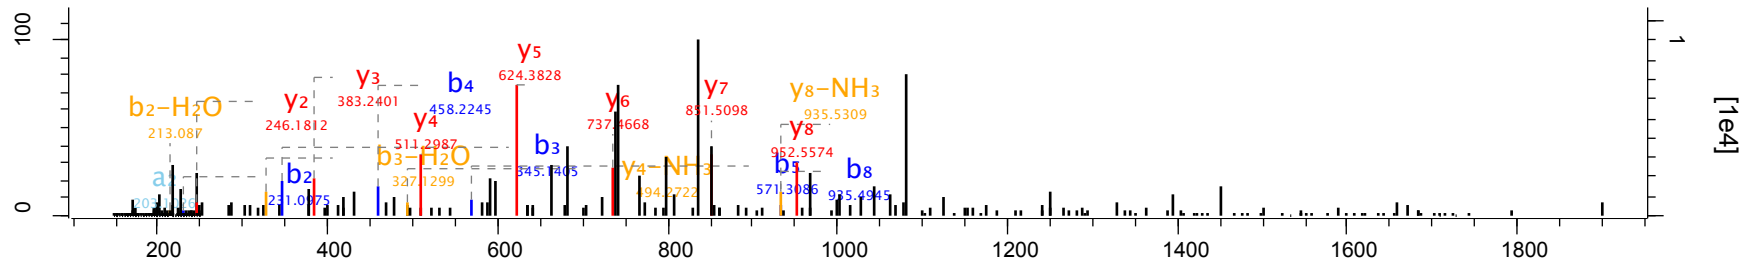

ac

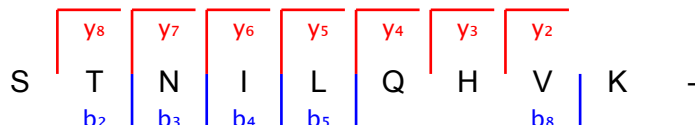

Raw file

20150306\_yeast1\_Top\_opt\_2ug\_C1\_01\_1668

Scan

41551

Method

TOF; CID

Score

85.36

m/z

886.45

Gene names

MSB2

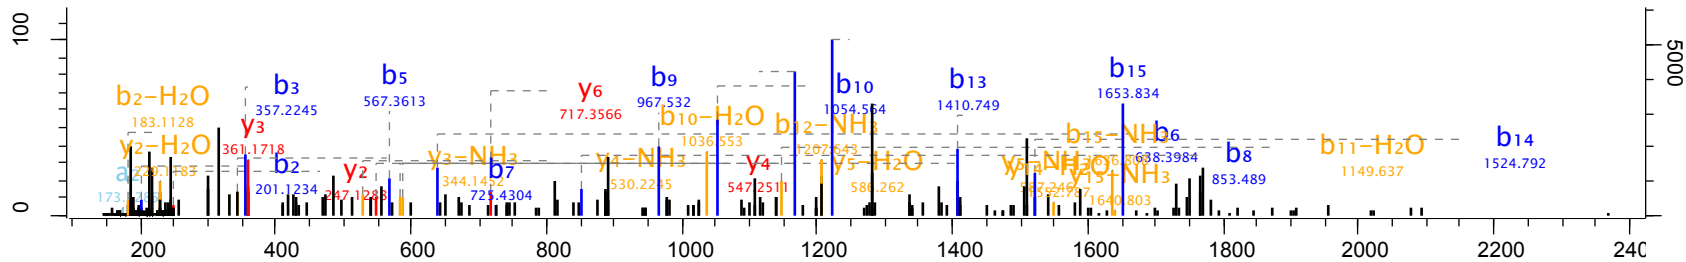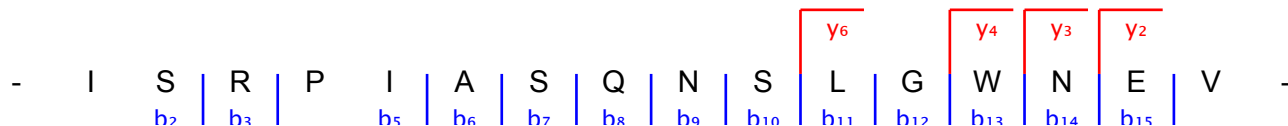

Raw file

Scan

Method

Score

m/z

Gene names

20150306\_yeast1\_Top\_opt\_2ug\_C1\_01\_1668

41940

TOF; CID

60.16

693.35

AXL1

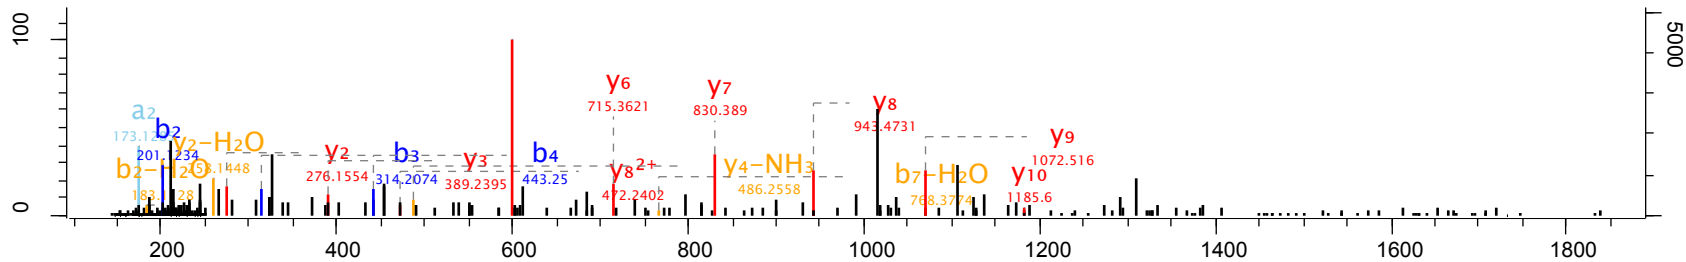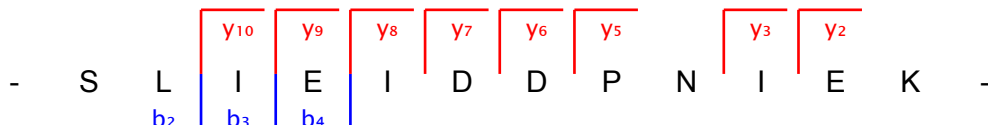

Raw file

Scan

Method

Score

m/z

Gene names

20150306\_yeast1\_Top\_opt\_2ug\_C1\_01\_1668

43693

TOF; CID

50.03

933.46

ESC8

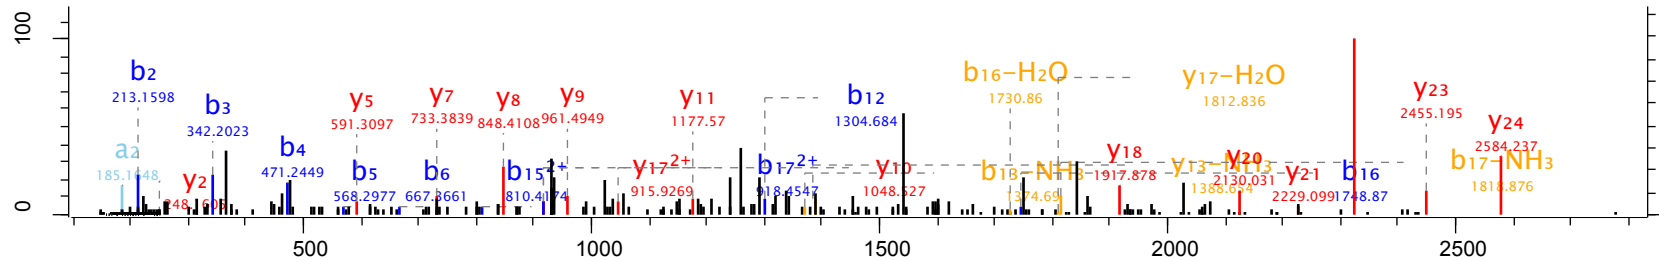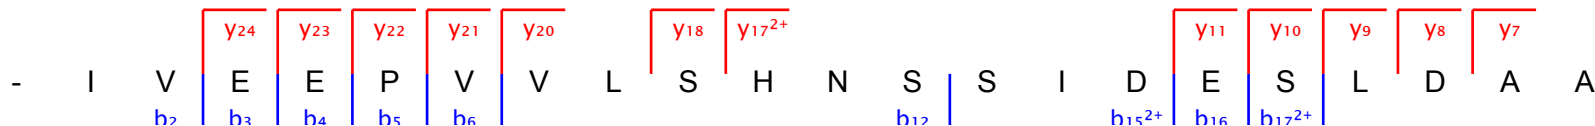



Raw file

Scan

Method

Score

m/z

Gene names

20150306\_yeast1\_Top\_opt\_2ug\_C1\_01\_1668

43774

TOF; CID

73.95

665.85

MET2

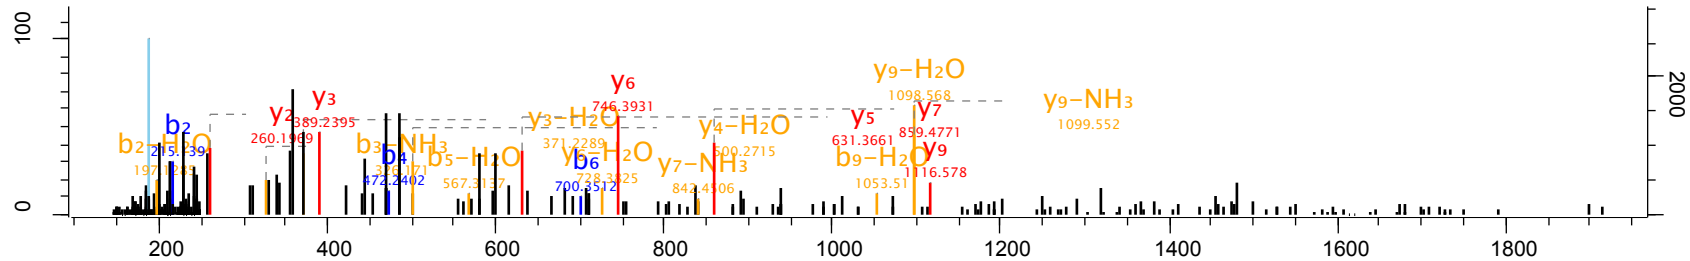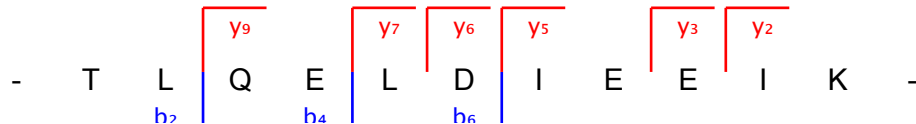

Raw file

Scan

Method

Score

m/z

Gene names

20150306\_yeast1\_Top\_opt\_2ug\_C1\_01\_1668

46790

TOF; CID

72.88

671.88

OCA4

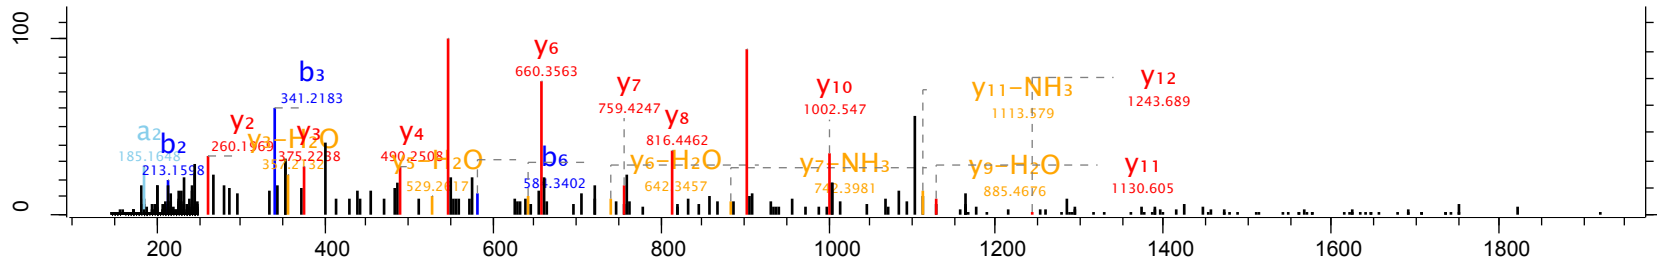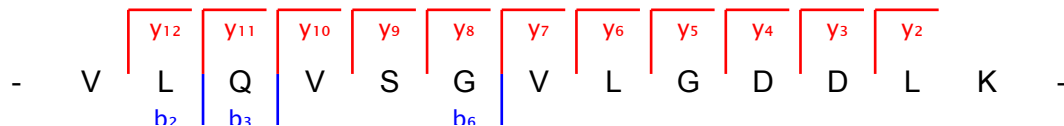

Raw file Scan Method Score m/z Gene names  
20150306\_yeast1\_Top\_opt\_2ug\_C1\_01\_1668 46898 TOF; CID 76.8 1009.14 YPL108W

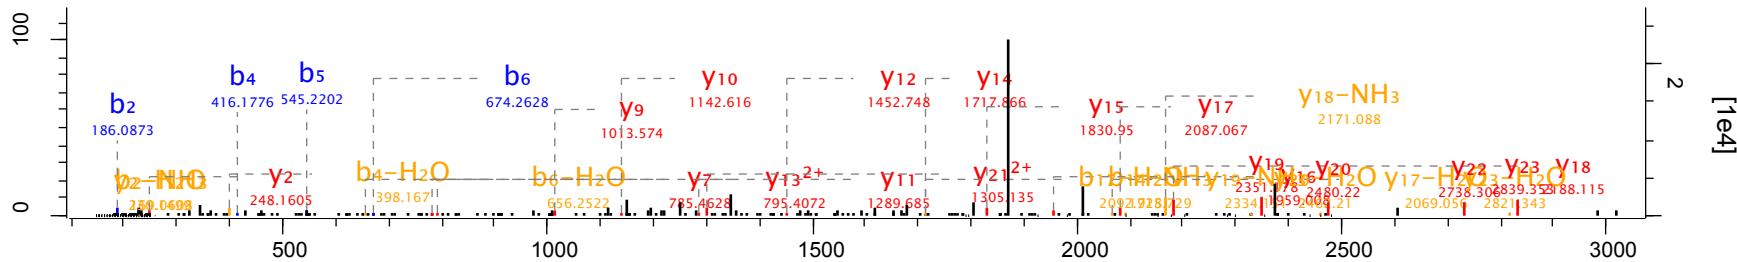

- G Q T E E E Y T Q Q L Q H Y F E V E Q G P  
b2 b4 b5 b6 y23 y22 y21<sup>2+</sup> y20 y19 y18 y17 y16 y15 y14 y13<sup>2+</sup> y12 y11 y10 y9 y7

Raw file

Scan

Method

Score

m/z

Gene names

20150306\_yeast1\_Top\_opt\_2ug\_C1\_01\_1668

47274

TOF; CID

73.27

729.87

AIM22

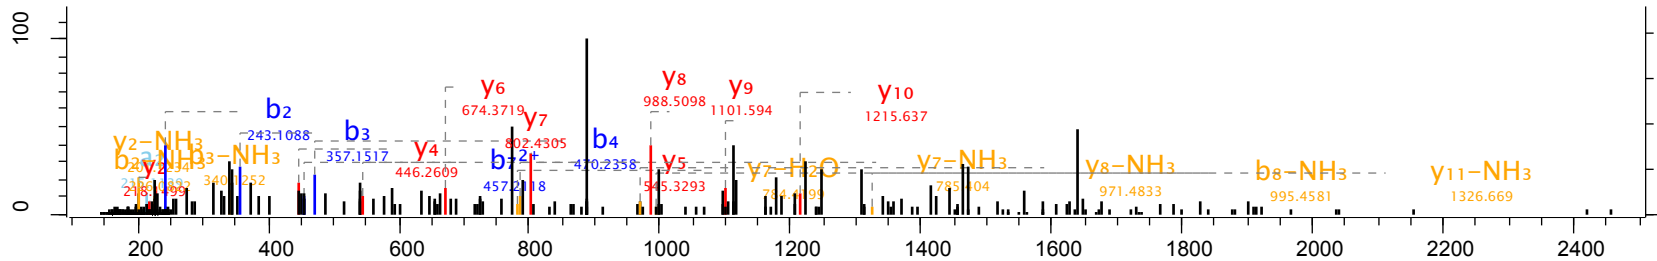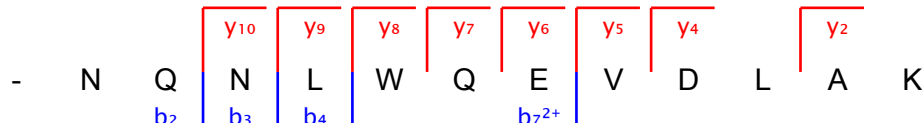

Raw file

Scan

Method

Score

m/z

Gene names

20150306\_yeast1\_Top\_opt\_2ug\_C1\_01\_1668

48441

TOF; CID

145.44

1176.07

EMC6

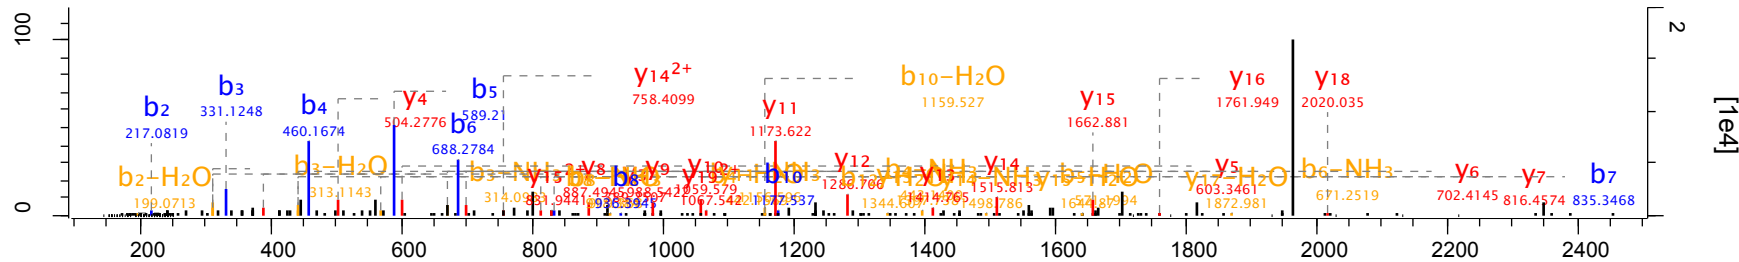

ac

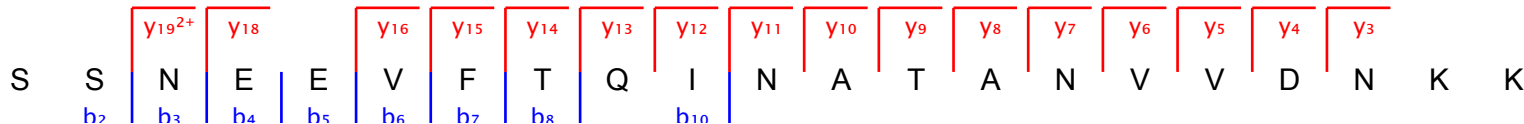

Raw file

Scan

Method

Score

m/z

Gene names

20150306\_yeast1\_Top\_opt\_2ug\_C1\_01\_1668

51336

TOF; CID

55.44

686.68

ISC1

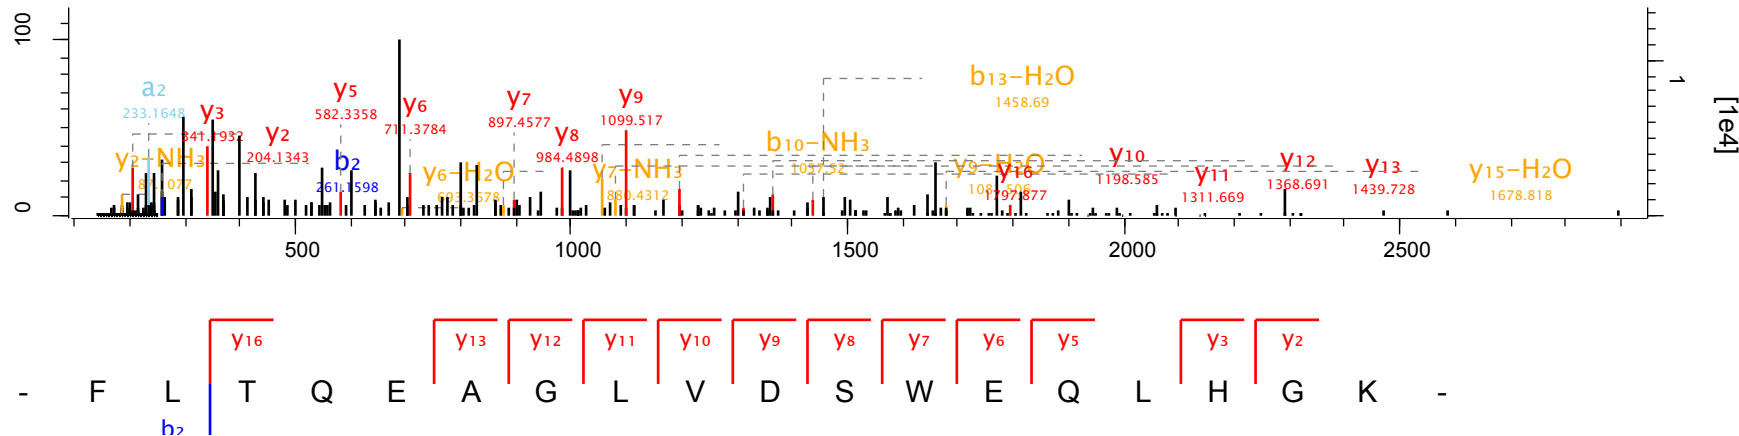

Raw file

Scan

Method

Score

m/z

Gene names

20150306\_yeast1\_Top\_opt\_2ug\_C1\_01\_1668

55720

TOF; CID

79.99

525.31

ICE2

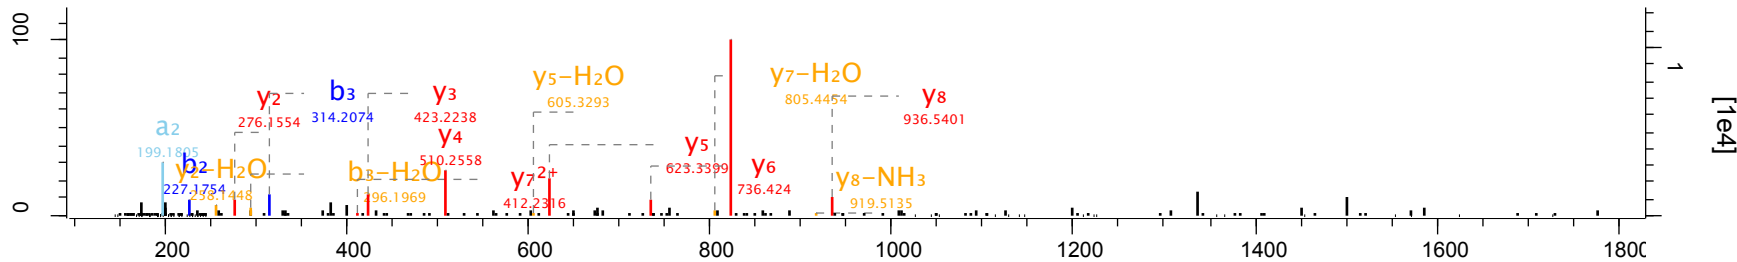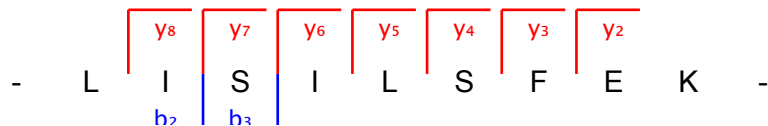

Raw file

Scan

Method

Score

m/z

Gene names

20150306\_yeast1\_Top\_opt\_2ug\_C1\_01\_1668

60578

TOF; CID

133.21

756.41

NKP2

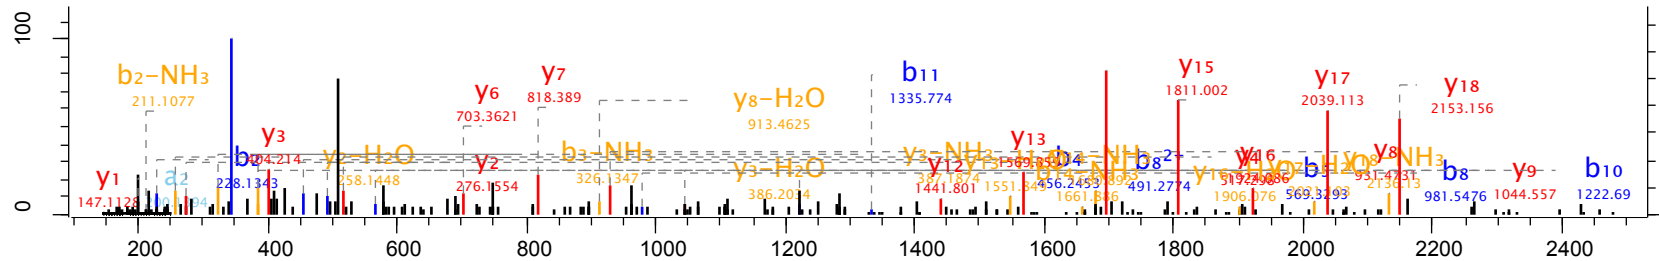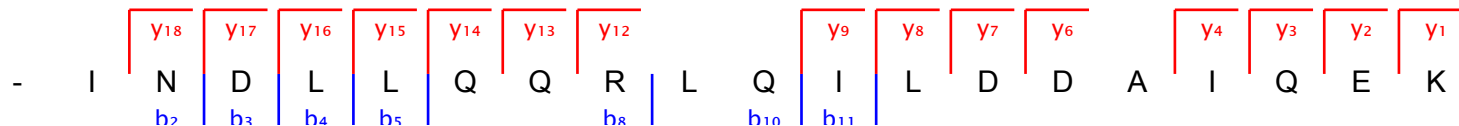



Raw file

20150306\_yeast1\_Top\_opt\_2ug\_C1\_01\_1668

Scan

65156

Method

TOF; CID

Score

154.65

m/z

568.99

Gene names

ERV14

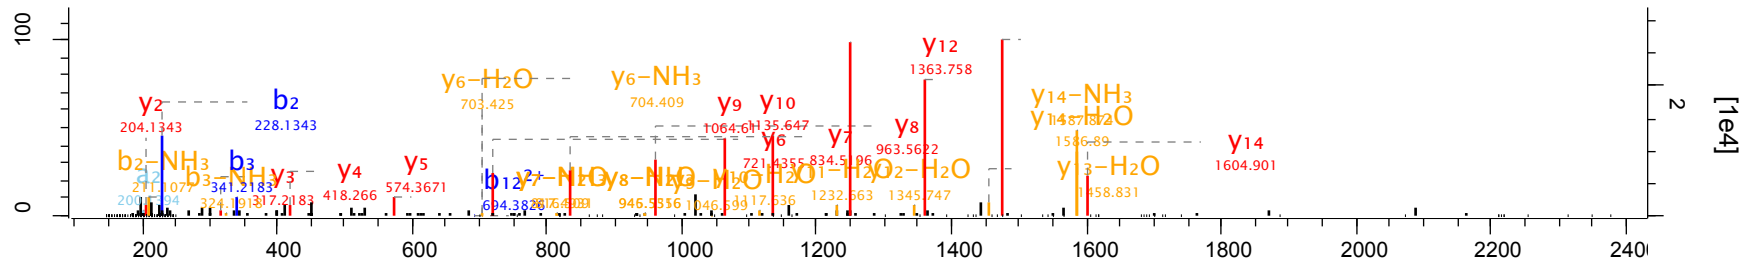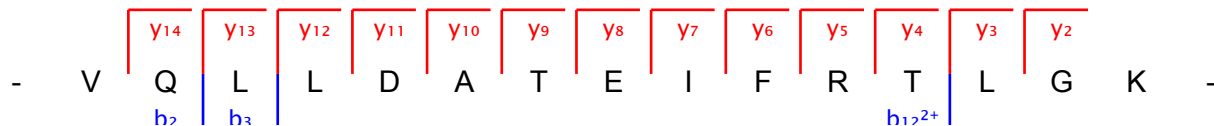

Raw file

Scan

Method

Score

m/z

Gene names

20150306\_yeast1\_Top\_opt\_2ug\_C1\_01\_1670

7060

TOF; CID

66.69

474.71

CAN1

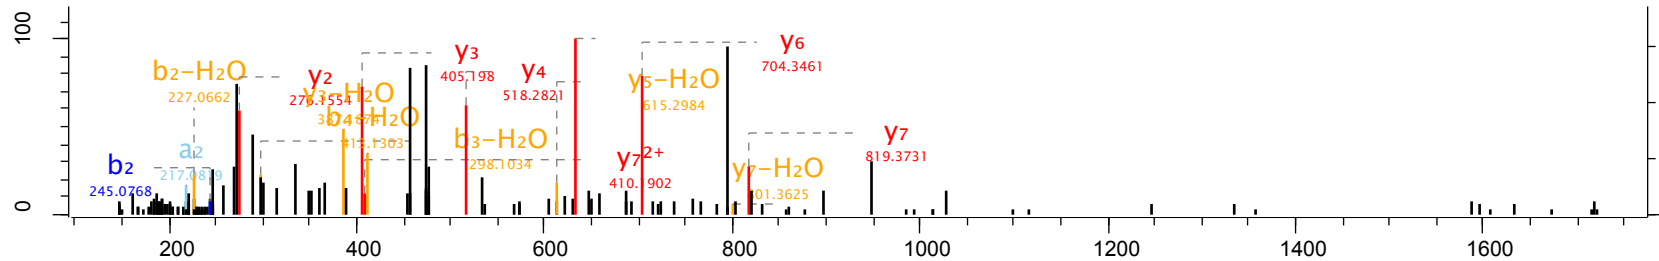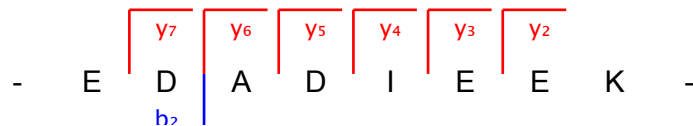

Raw file

20150306\_yeast1\_Top\_opt\_2ug\_C1\_01\_1670

Scan

12678

Method

TOF; CID

Score

96.63

m/z

634.27

Gene names

TPN1

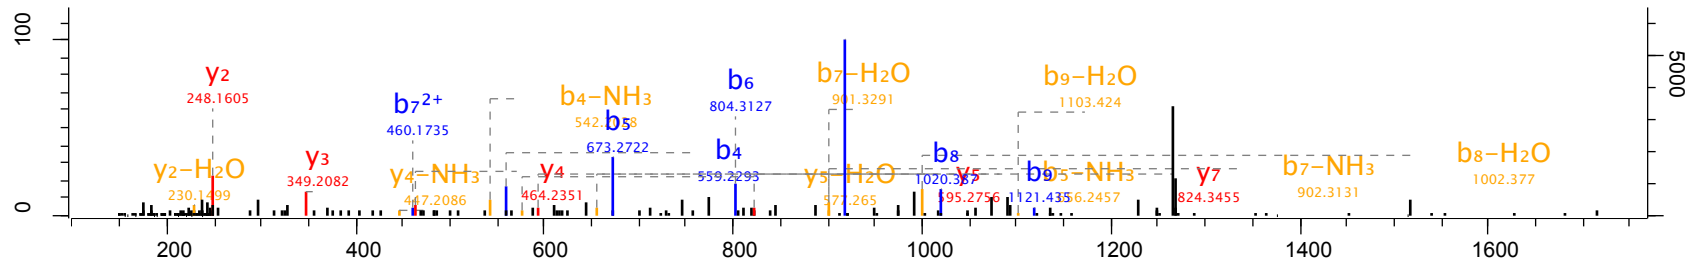

ac

- M N R D N M D T T K -

h<sub>4</sub> | h<sub>5</sub> | h<sub>6</sub> | h<sub>7</sub> | h<sub>8</sub> | h<sub>9</sub>

y<sub>7</sub> | y<sub>5</sub> | y<sub>4</sub> | y<sub>3</sub> | y<sub>2</sub>

Raw file

Scan

Method

Score

m/z

Gene names

20150306\_yeast1\_Top\_opt\_2ug\_C1\_01\_1670

13059

TOF; CID

80.69

651.29

FUN26

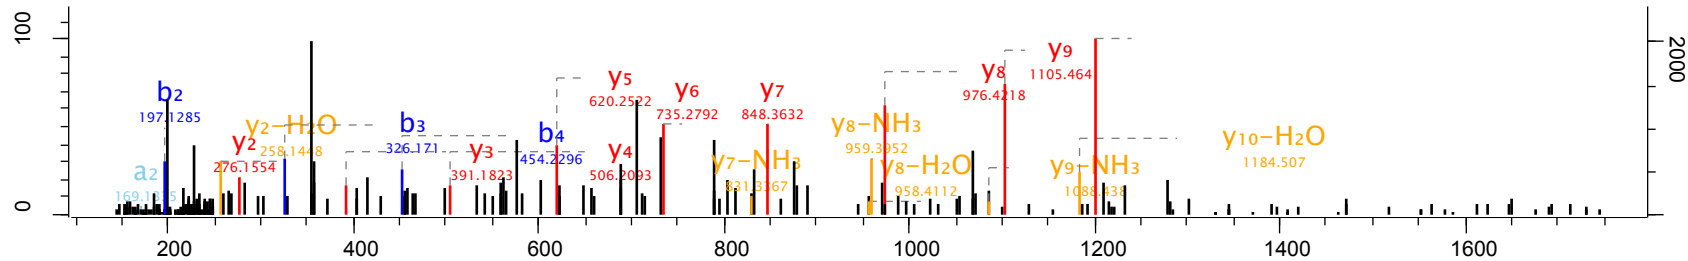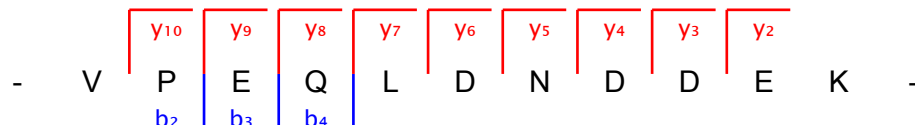

Raw file

Scan

Method

Score

m/z

Gene names

20150306\_yeast1\_Top\_opt\_2ug\_C1\_01\_1670

14179

TOF; CID

114.55

645.32

UPC2

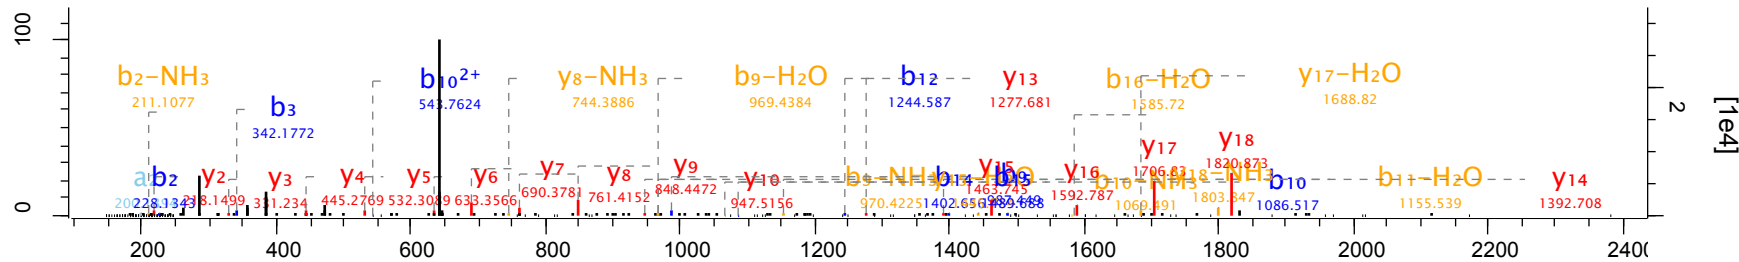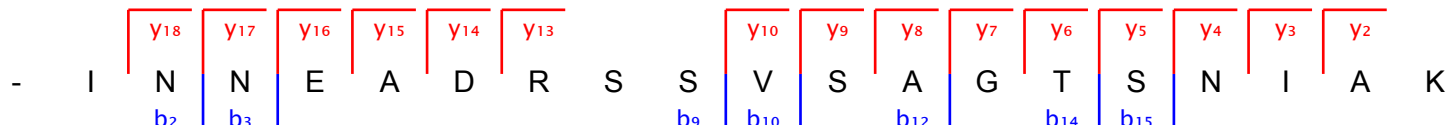

Raw file

Scan

Method

Score

m/z

Gene names

20150306\_yeast1\_Top\_opt\_2ug\_C1\_01\_1670

16000

TOF; CID

113.41

439.72

RPS29A

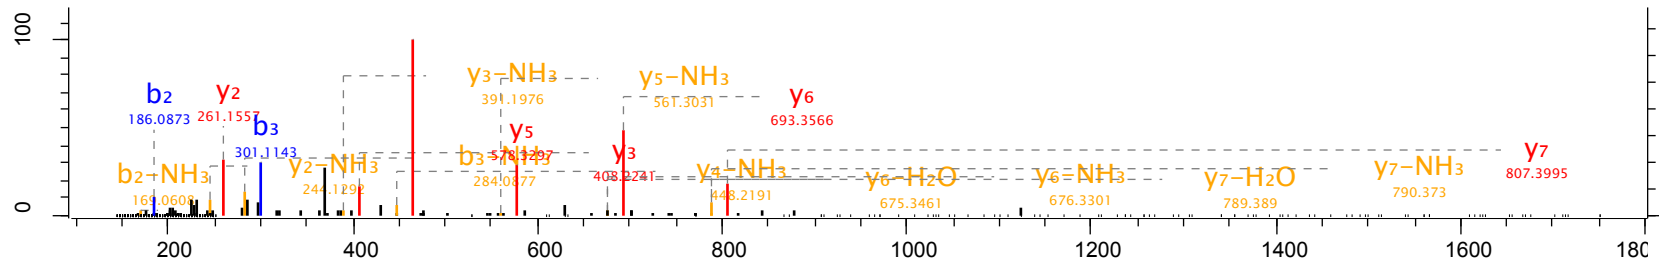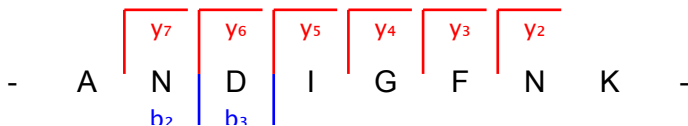

Raw file

Scan

Method

Score

m/z

Gene names

20150306\_yeast1\_Top\_opt\_2ug\_C1\_01\_1670

16193

TOF; CID

75.65

531.27

SIP3

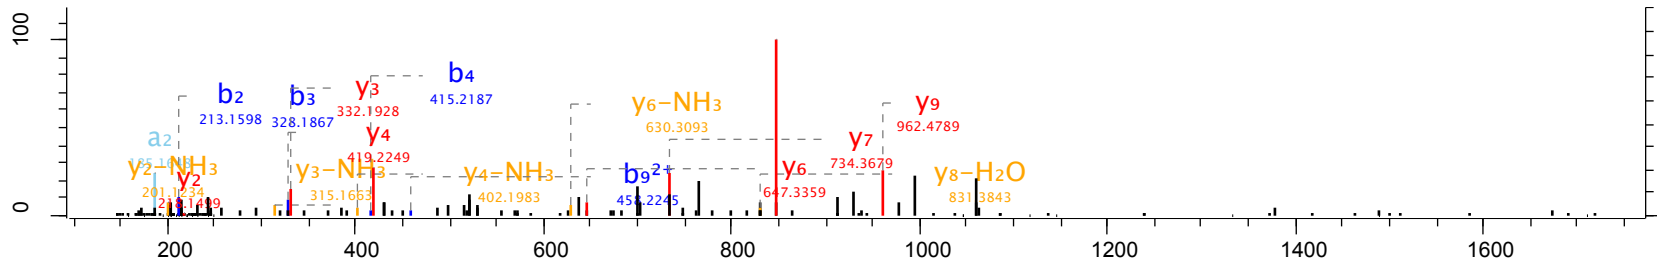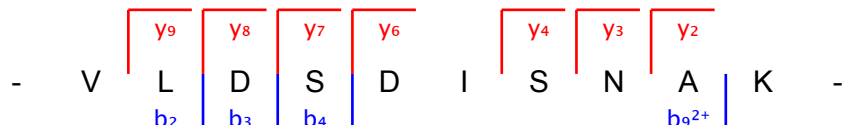

Raw file

Scan

Method

Score

m/z

20150306\_yeast1\_Top\_opt\_2ug\_C1\_01\_1670

17374

TOF; CID

71.81

703.32

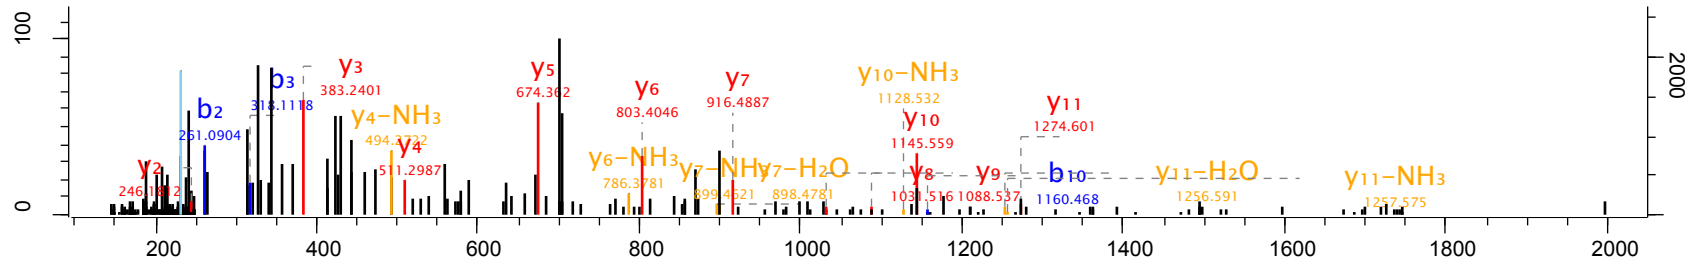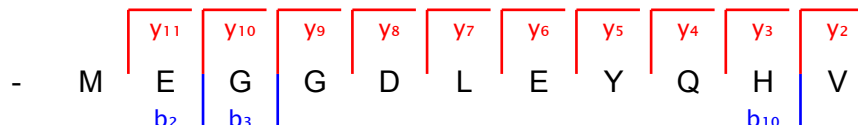



Raw file

20150306\_yeast1\_Top\_opt\_2ug\_C1\_01\_1670

Scan

18656

Method

TOF; CID

Score

69.81

m/z

613.3

Gene names

HMS2

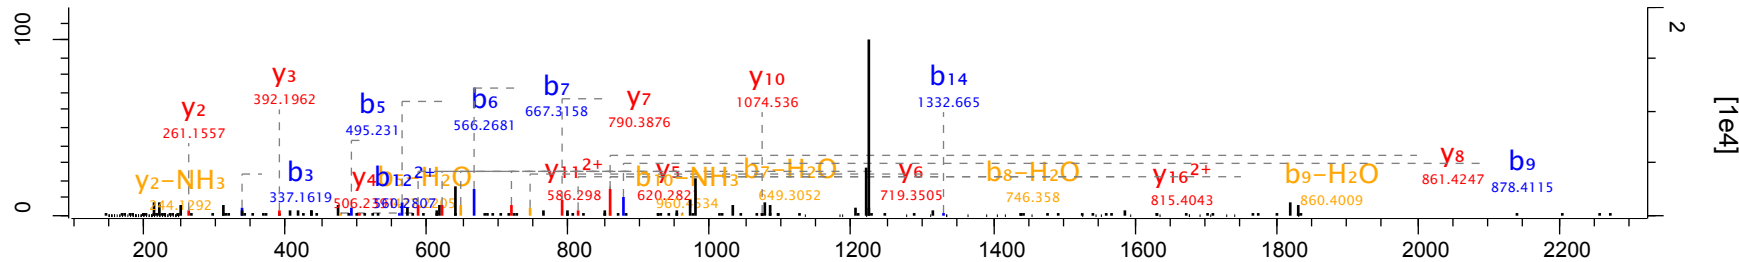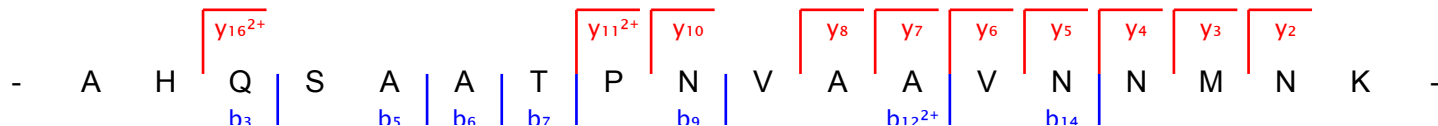

Raw file

Scan

Method

Score

m/z

Gene names

20150306\_yeast1\_Top\_opt\_2ug\_C1\_01\_1670

21064

TOF; CID

98.41

587.32

UGO1

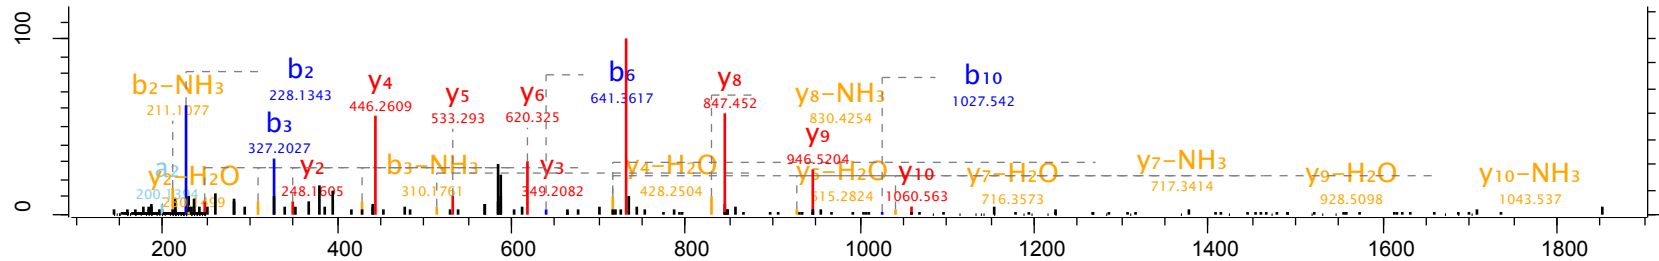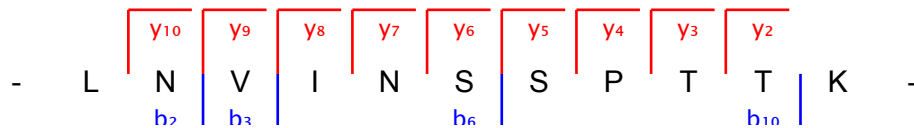

Raw file

Scan

Method

Score

m/z

Gene names

20150306\_yeast1\_Top\_opt\_2ug\_C1\_01\_1670

23244

TOF; CID

68.66

481.26

YSC83

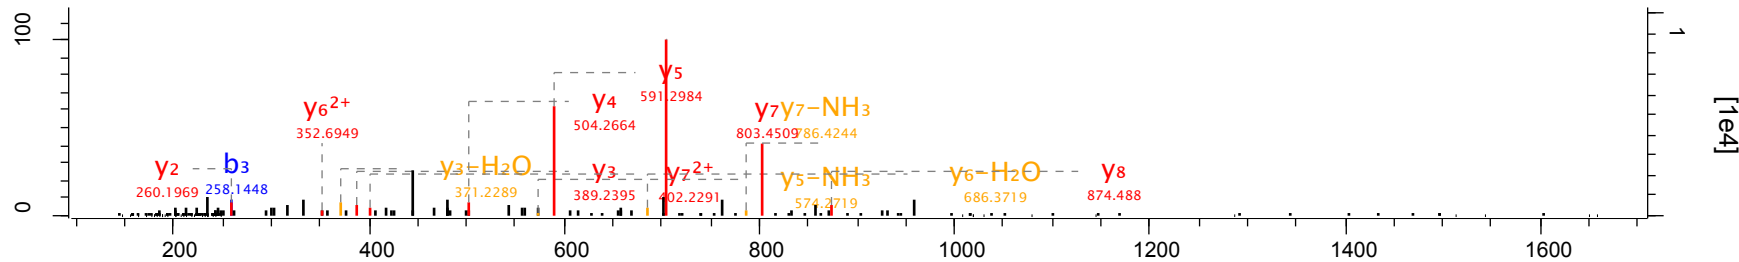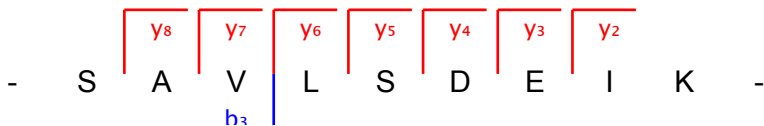

Raw file

Scan

Method

Score

m/z

Gene names

20150306\_yeast1\_Top\_opt\_2ug\_C1\_01\_1670

23637

TOF; CID

96.23

433.22

LSM8

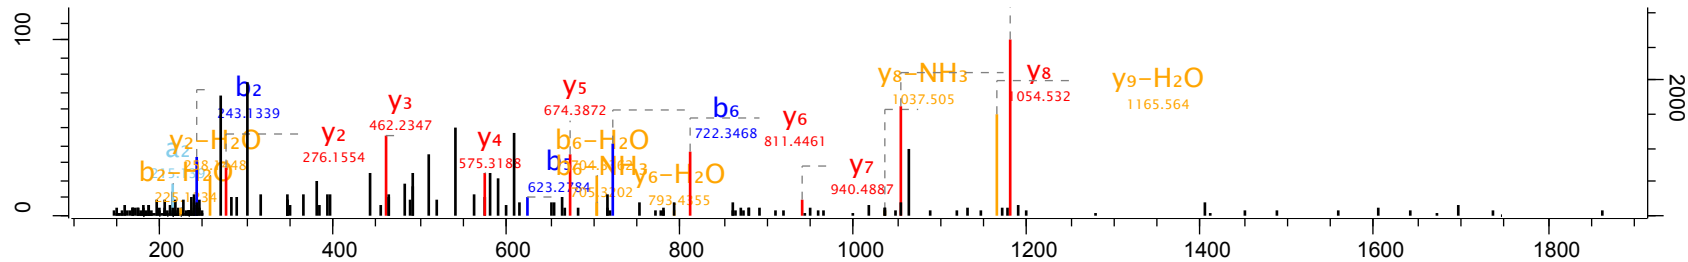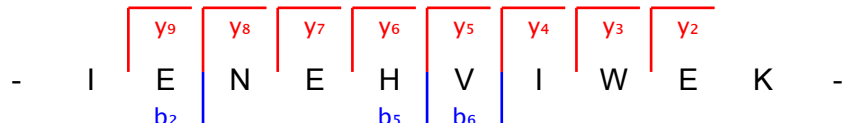

Raw file

Scan

Method

Score

m/z

Gene names

20150306\_yeast1\_Top\_opt\_2ug\_C1\_01\_1670

25067

TOF; CID

88.06

618.8

NGR1

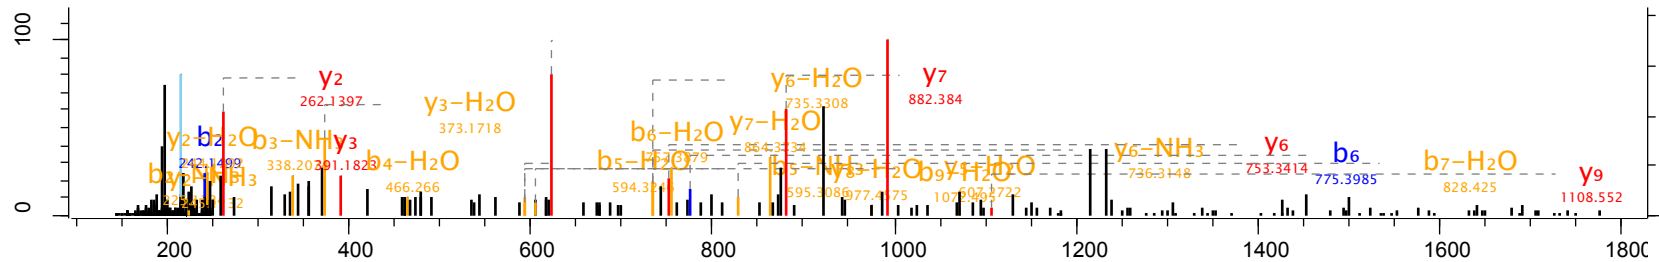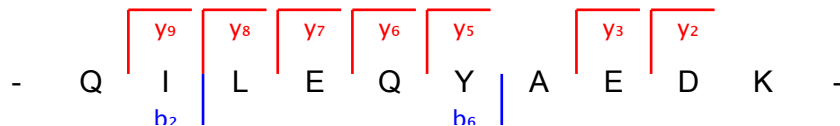

Raw file

20150306\_yeast1\_Top\_opt\_2ug\_C1\_01\_1670

Scan

25520

Method

TOF; CID

Score

56.75

m/z

823.05

Gene names

YDR374W-A

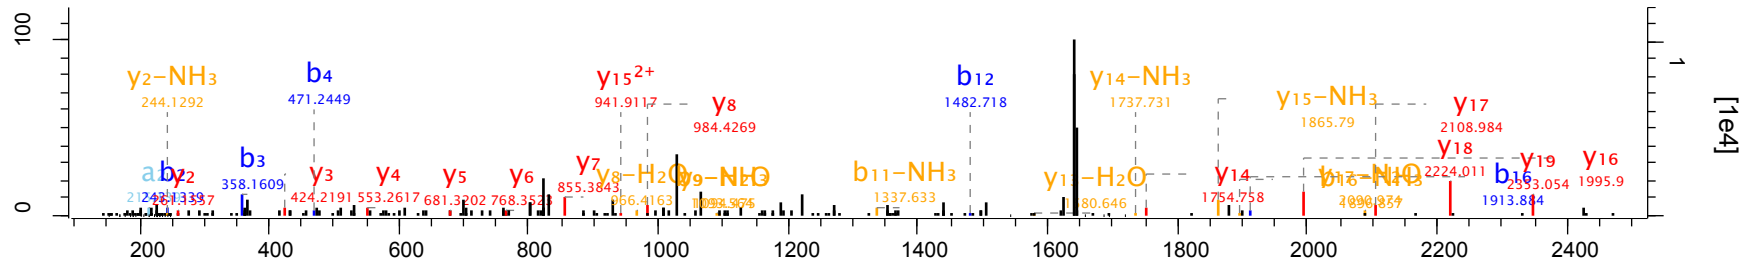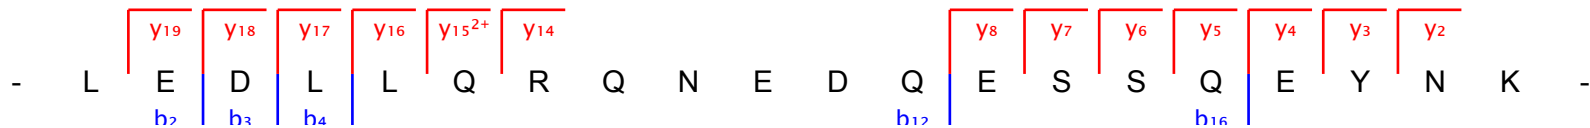

Raw file

20150306\_yeast1\_Top\_opt\_2ug\_C1\_01\_1670

Scan

26807

Method

TOF; CID

Score

189.81

m/z

610.96

Gene names

MDM35

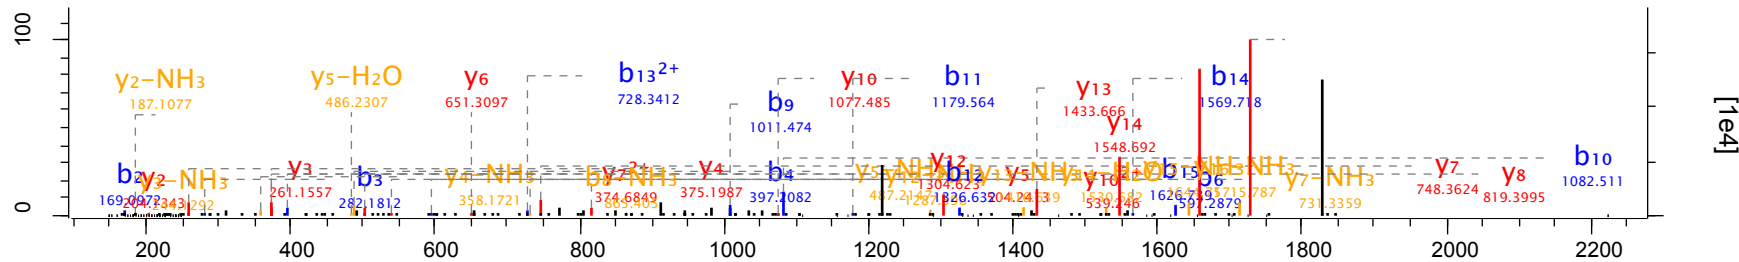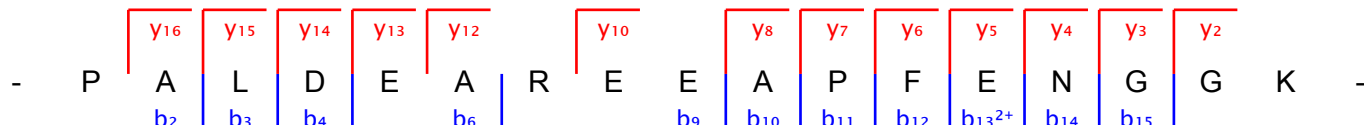

Raw file

20150306\_yeast1\_Top\_opt\_2ug\_C1\_01\_1670

Scan

29171

Method

TOF; CID

Score

52.39

m/z

589.82

Gene names

ECM3

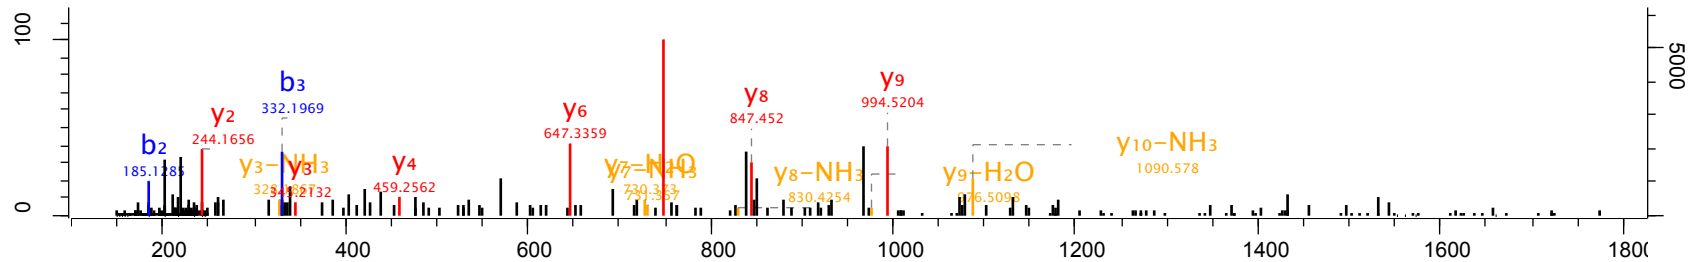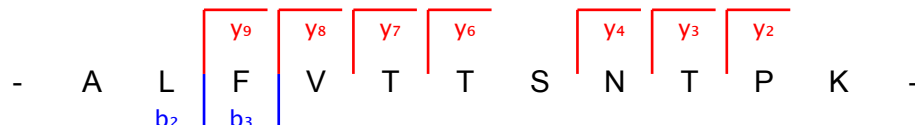



Raw file

Scan

Method

Score

m/z

Gene names

20150306\_yeast1\_Top\_opt\_2ug\_C1\_01\_1670

29172

TOF; CID

69.19

572.97

TBS1

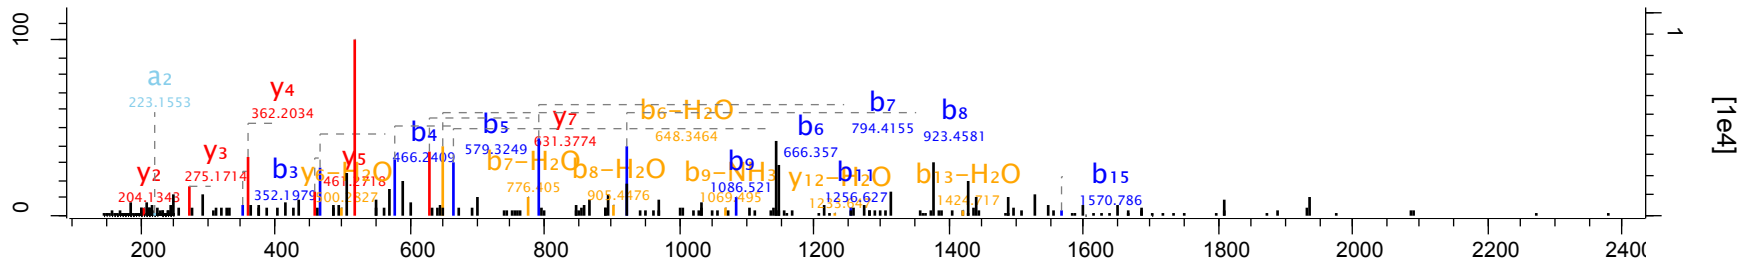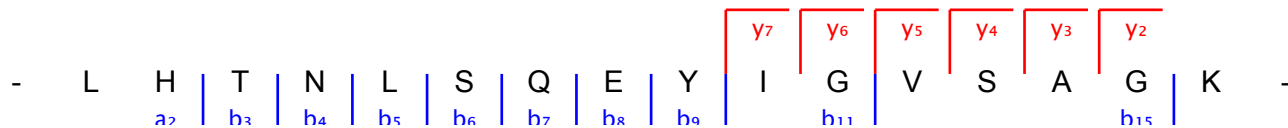

Raw file

Scan

Method

Score

m/z

Gene names

20150306\_yeast1\_Top\_opt\_2ug\_C1\_01\_1670

29190

TOF; CID

71.08

593.83

TEC1

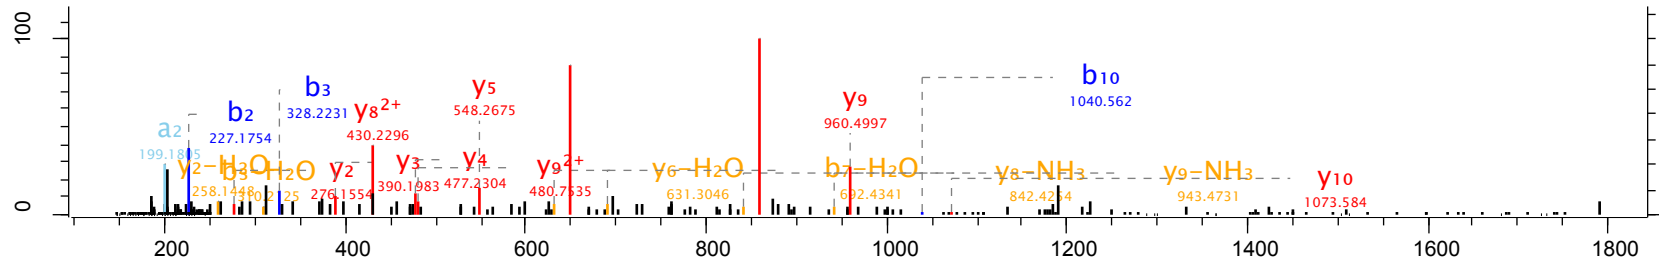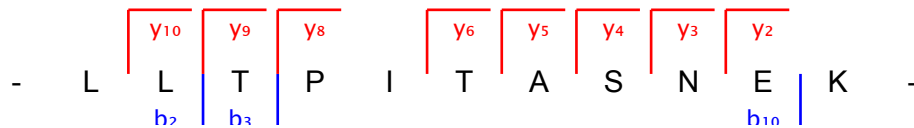

Raw file

20150306\_yeast1\_Top\_opt\_2ug\_C1\_01\_1670

Scan

33331

Method

TOF; CID

Score

68.21

m/z

436.28

Gene names

COQ9

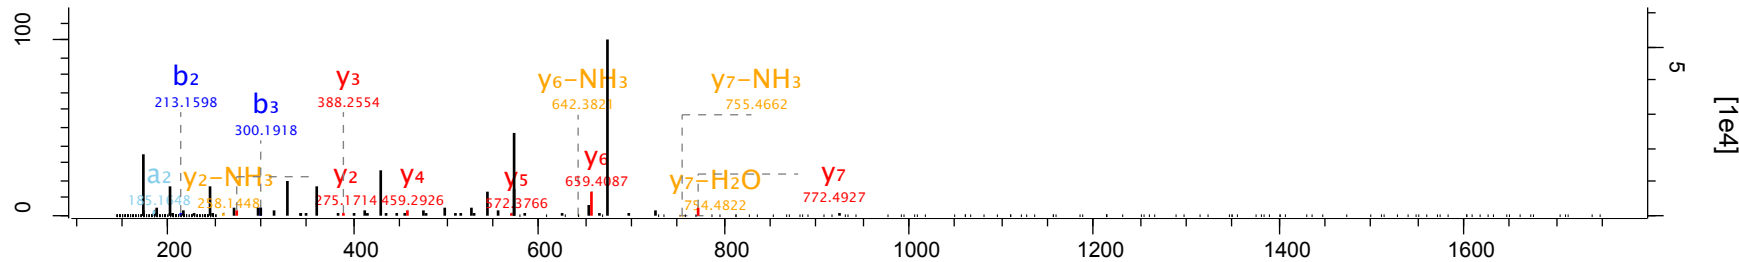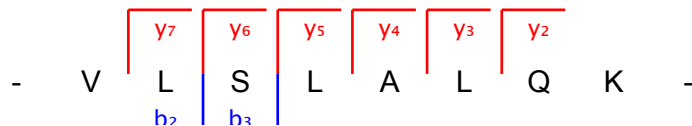

Raw file

20150306\_yeast1\_Top\_opt\_2ug\_C1\_01\_1670

Scan

36251

Method

TOF; CID

Score

107.21

m/z

548.76

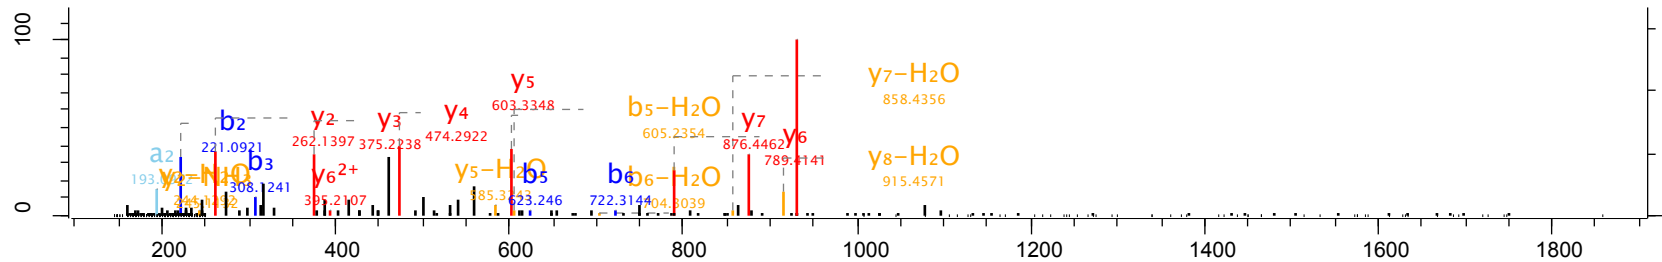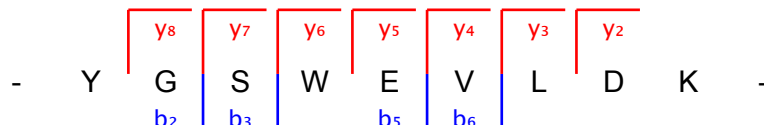

Raw file

Scan

Method

Score

m/z

20150306\_yeast1\_Top\_opt\_2ug\_C1\_01\_1670

37795

TOF; CID

63.18

575.28

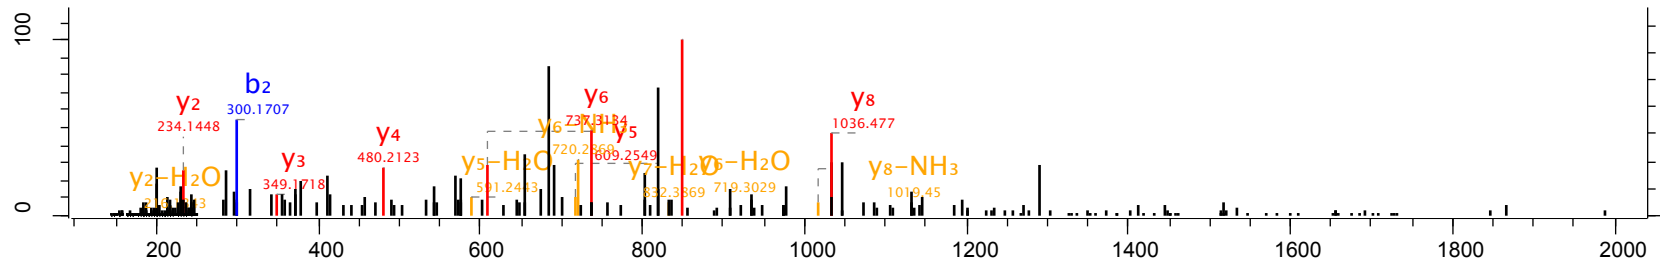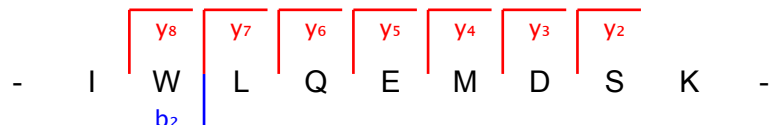

Raw file

Scan

Method

Score

m/z

Gene names

20150306\_yeast1\_Top\_opt\_2ug\_C1\_01\_1670

39299

TOF; CID

60.55

610.29

AIR2

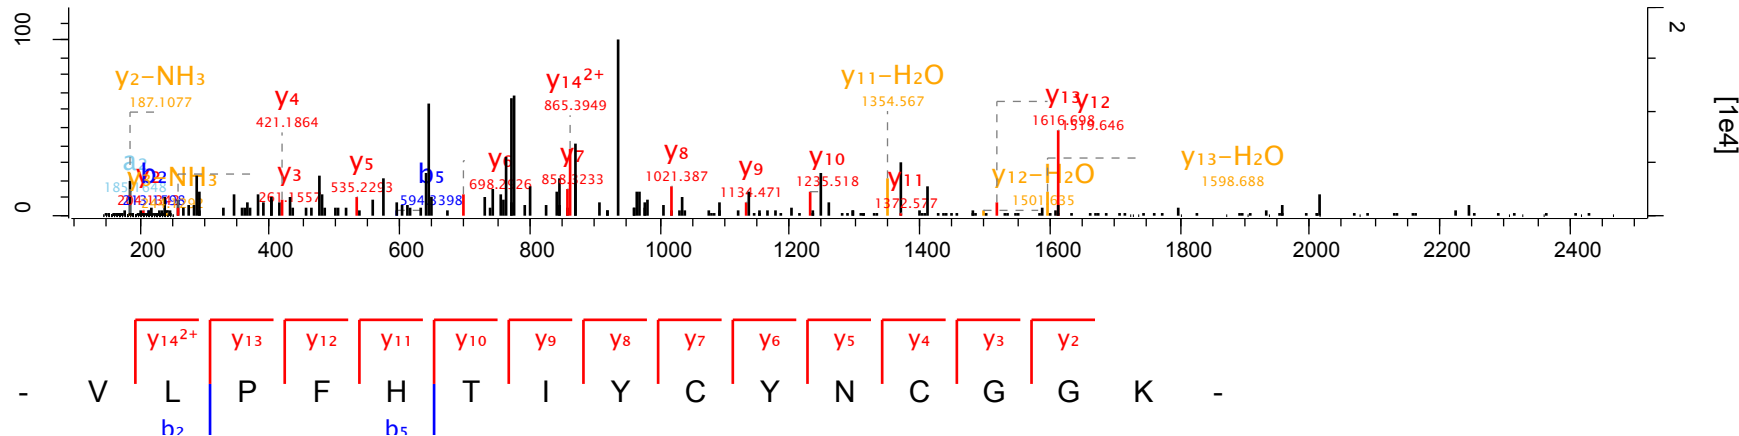

Raw file

20150306\_yeast1\_Top\_opt\_2ug\_C1\_01\_1670

Scan

39982

Method

TOF; CID

Score

94.69

m/z

400.55

Gene names

YHR162W;FMP43

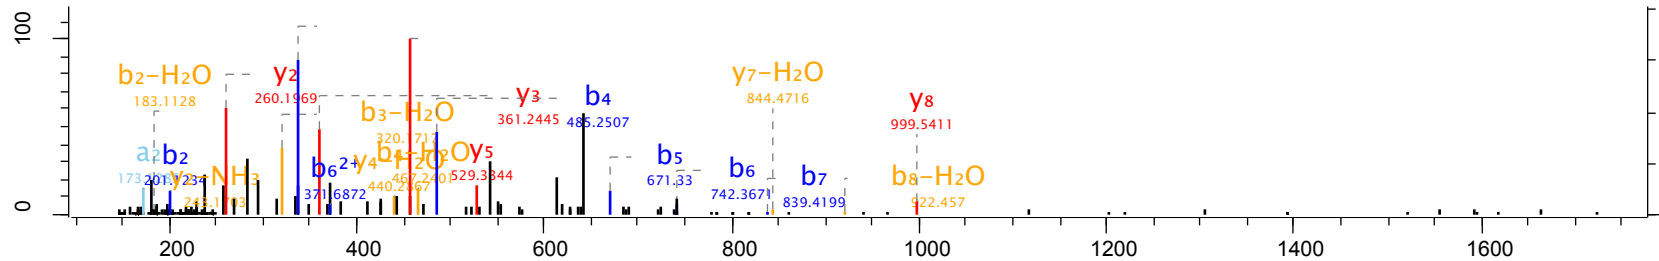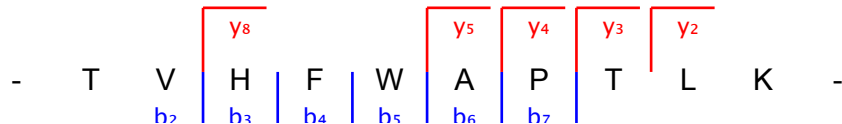

Raw file

20150306\_yeast1\_Top\_opt\_2ug\_C1\_01\_1670

Scan

40244

Method

TOF; CID

Score

190.96

m/z

985.98

Gene names

TIF6

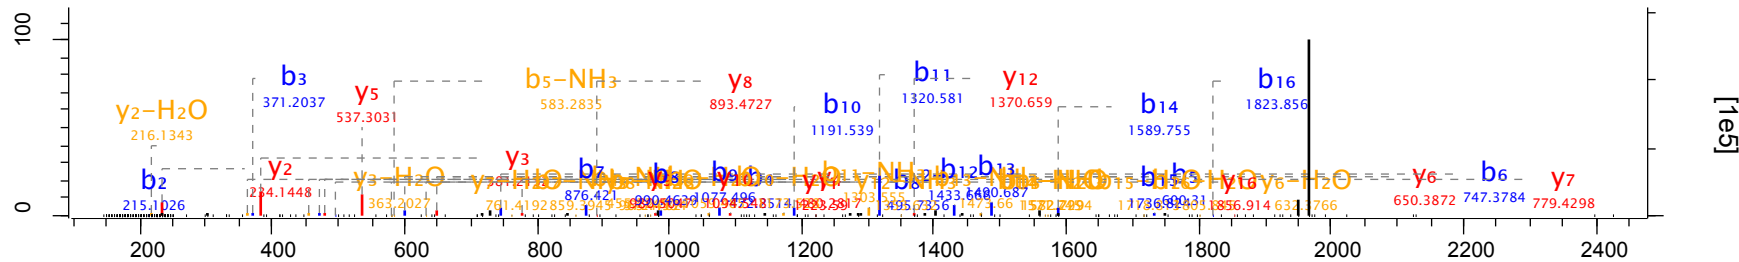

ac

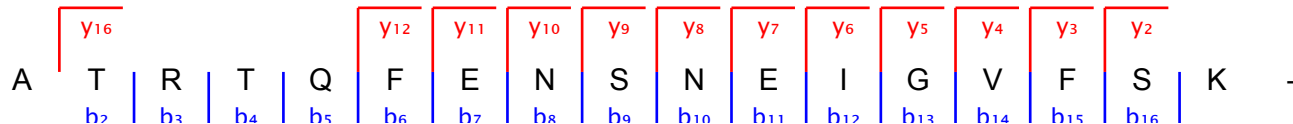



Raw file

Scan

Method

Score

m/z

Gene names

20150306\_yeast1\_Top\_opt\_2ug\_C1\_01\_1670

40889

TOF; CID

43.59

857.9

PSD2

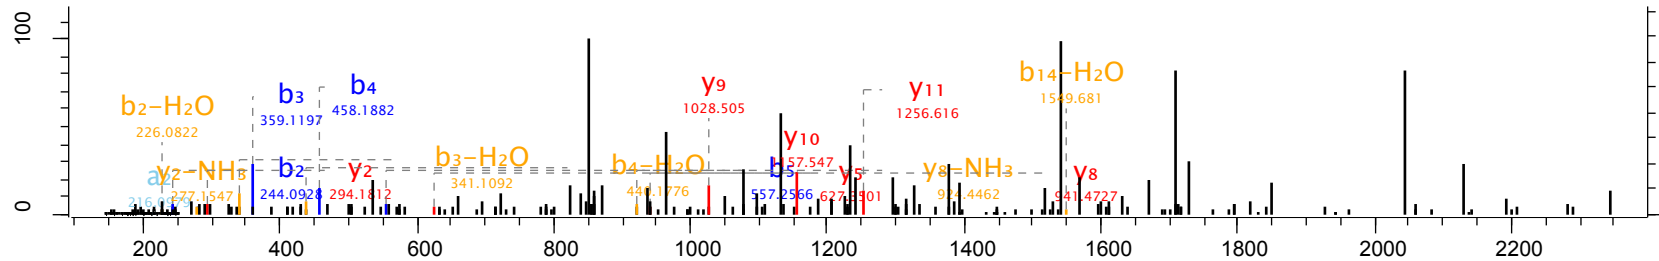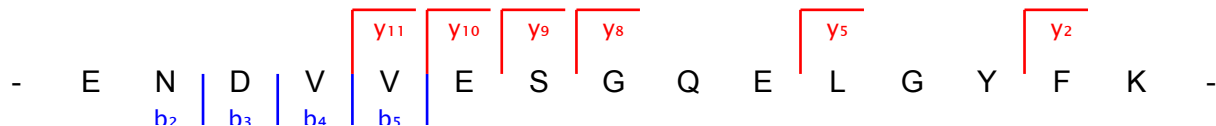

Raw file

Scan

Method

Score

m/z

Gene names

20150306\_yeast1\_Top\_opt\_2ug\_C1\_01\_1670

42627

TOF; CID

52.07

658.85

FUS3

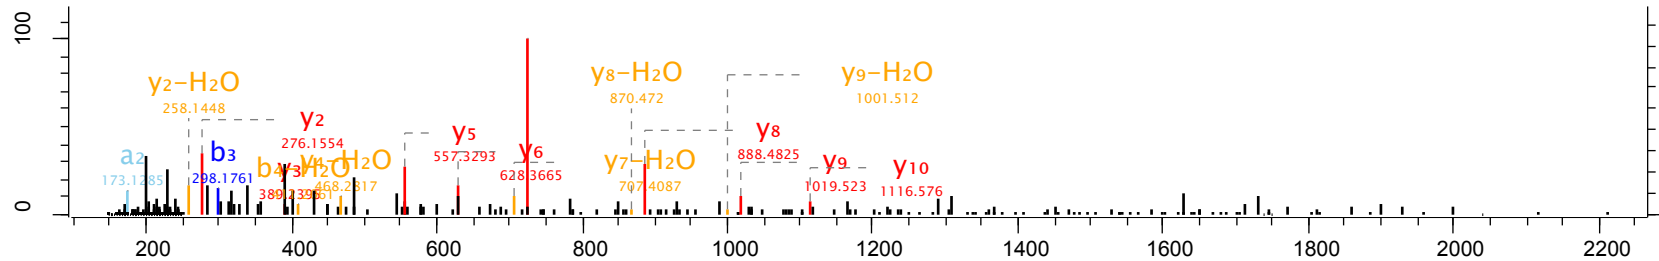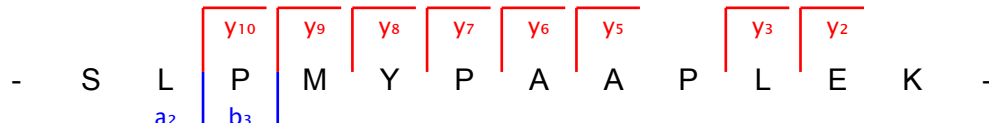

Raw file

Scan

Method

Score

m/z

Gene names

20150306\_yeast1\_Top\_opt\_2ug\_C1\_01\_1670

42859

TOF; CID

50.08

736.89

LST4

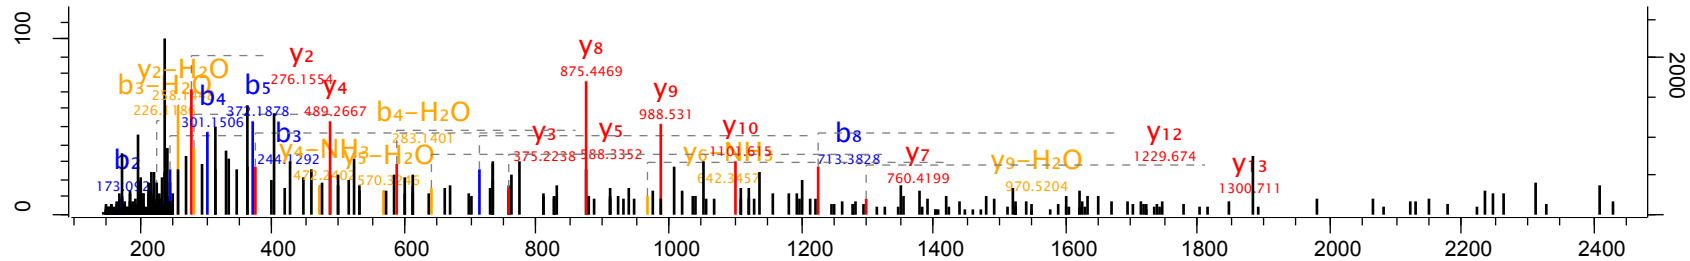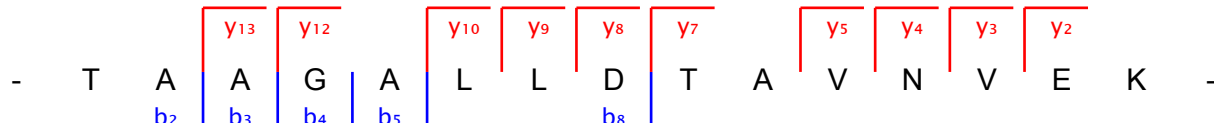

Raw file

Scan

Method

Score

m/z

Gene names

20150306\_yeast1\_Top\_opt\_2ug\_C1\_01\_1670

43302

TOF; CID

92.54

626.83

DOT1

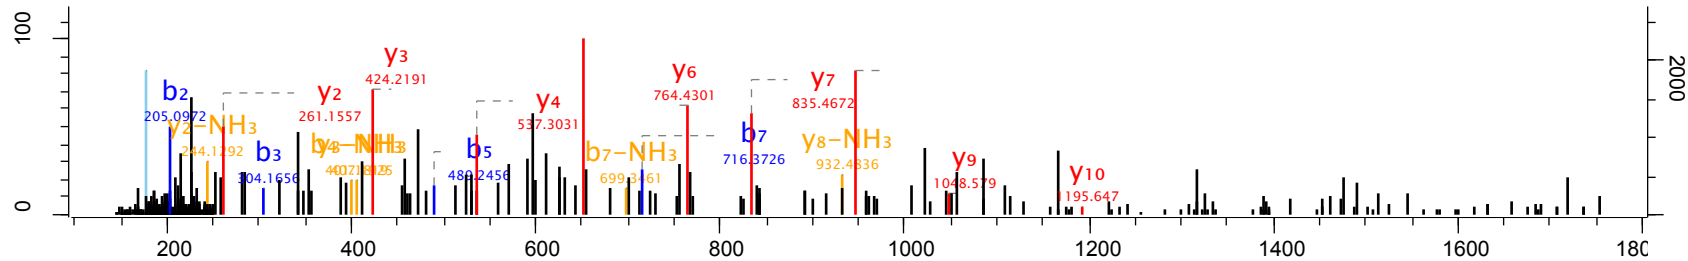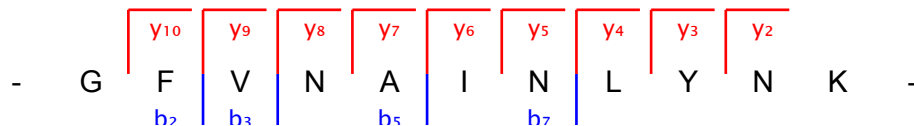

Raw file

Scan

Method

Score

m/z

Gene names

20150306\_yeast1\_Top\_opt\_2ug\_C1\_01\_1670

44790

TOF; CID

107.75

851.42

RFX1

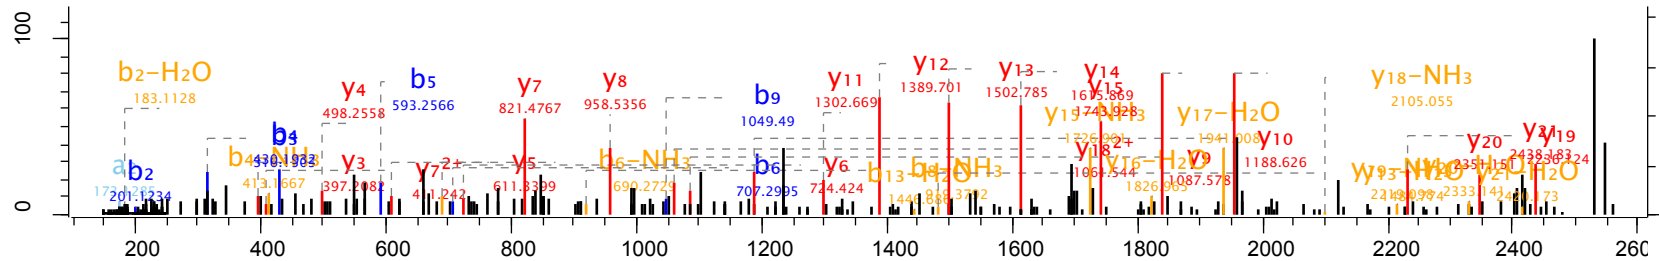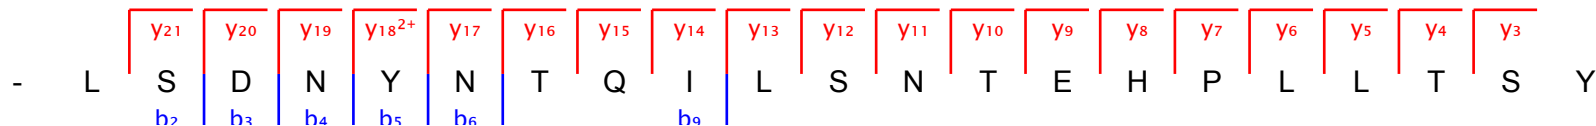

Raw file

20150306\_yeast1\_Top\_opt\_2ug\_C1\_01\_1670

Scan

45312

Method

TOF; CID

Score

124.19

m/z

891.42

Gene names

YBR255C-A

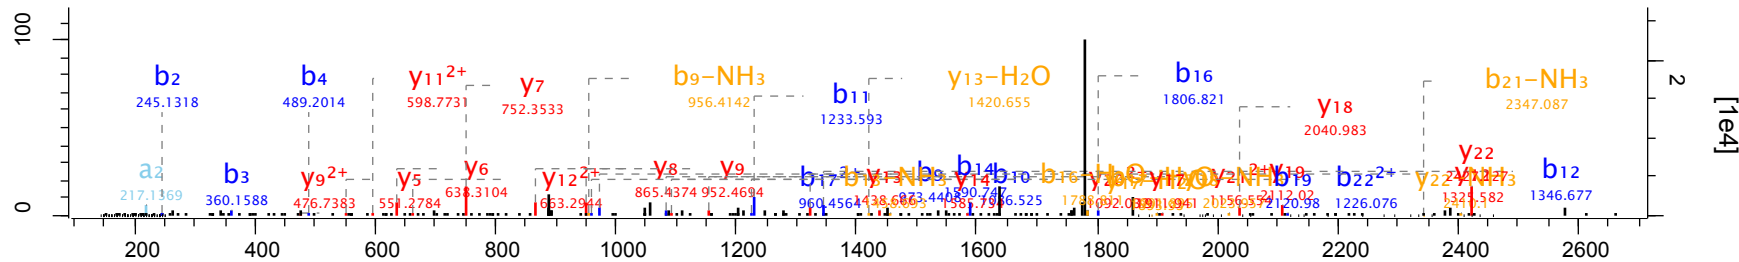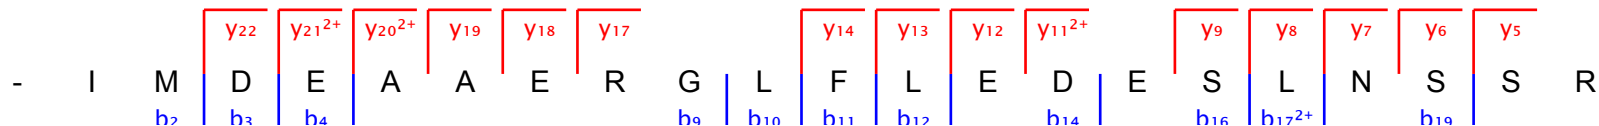

Raw file

20150306\_yeast1\_Top\_opt\_2ug\_C1\_01\_1670

Scan

47784

Method

TOF; CID

Score

54.26

m/z

590.8

Gene names

MRL1

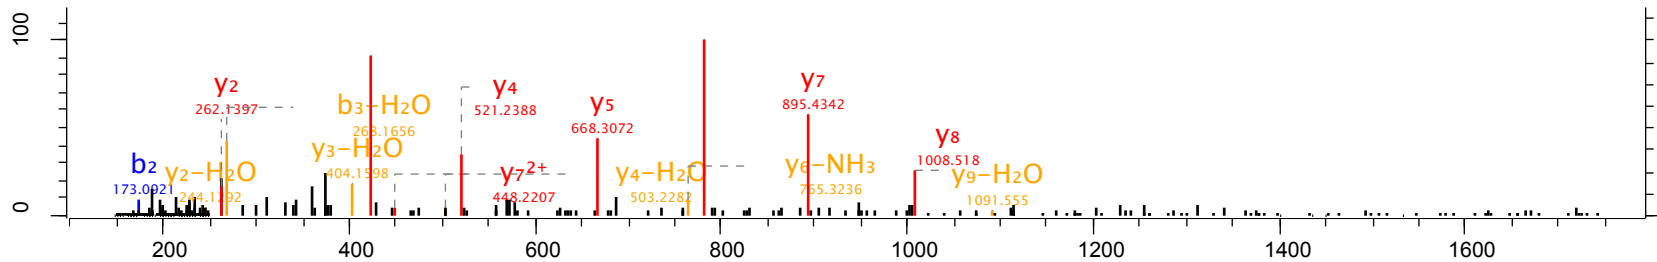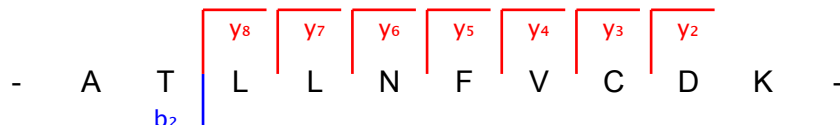

Raw file

Scan

Method

Score

m/z

Gene names

20150306\_yeast1\_Top\_opt\_2ug\_C1\_01\_1670

48513

TOF; CID

61.94

730.37

ADF1

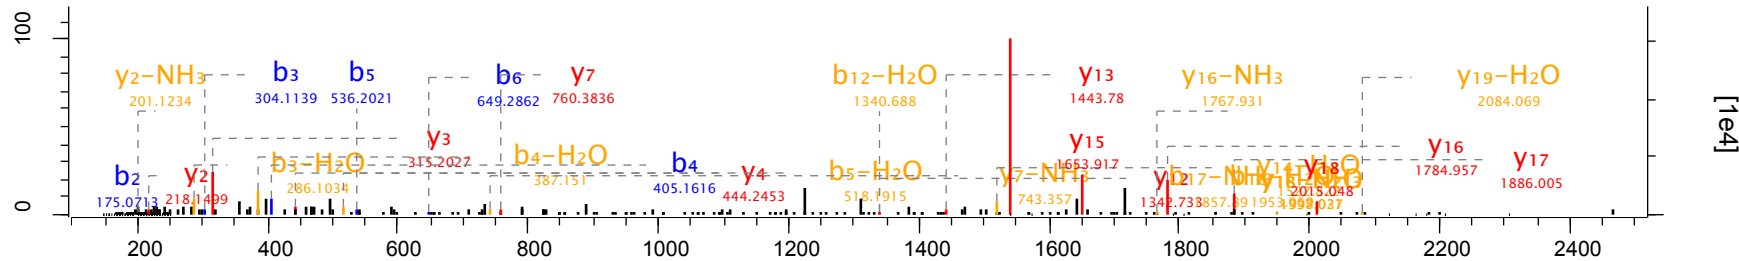

- S S E T M I P T L L R E A S T Q E P A K -

b<sub>2</sub> b<sub>3</sub> b<sub>4</sub> b<sub>5</sub> b<sub>6</sub> y<sub>18</sub> y<sub>17</sub> y<sub>16</sub> y<sub>15</sub> y<sub>14</sub> y<sub>13</sub> y<sub>12</sub> y<sub>7</sub> y<sub>4</sub> y<sub>3</sub> y<sub>2</sub>



Raw file

Scan

Method

Score

m/z

Gene names

20150306\_yeast1\_Top\_opt\_2ug\_C1\_01\_1670

49457

TOF; CID

87.96

745.37

DAS1

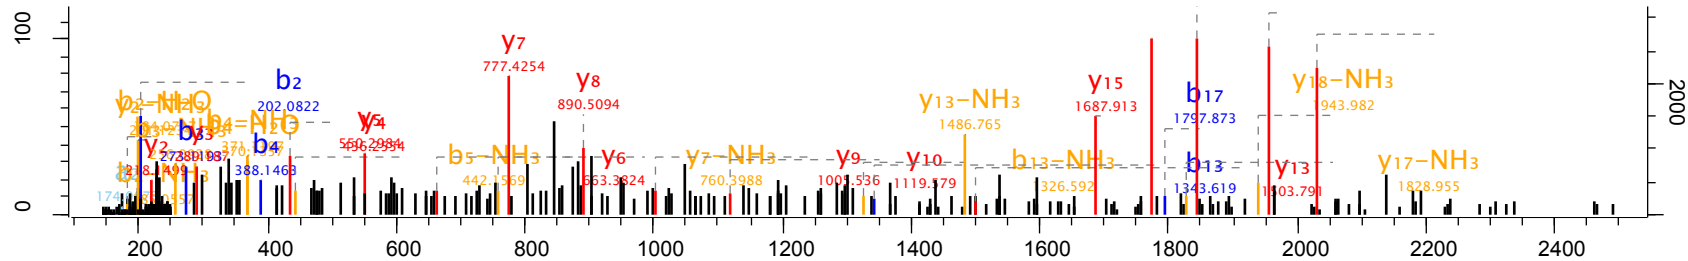

- S N A D A S A L R D I N D I N I N F A A K

b<sub>2</sub> b<sub>3</sub> b<sub>4</sub> b<sub>13</sub> b<sub>17</sub>

y<sub>19</sub> y<sub>18</sub> y<sub>17</sub> y<sub>16</sub> y<sub>15</sub> y<sub>13</sub> y<sub>10</sub> y<sub>9</sub> y<sub>8</sub> y<sub>7</sub> y<sub>6</sub> y<sub>5</sub> y<sub>4</sub> y<sub>3</sub> y<sub>2</sub>

Raw file

20150306\_yeast1\_Top\_opt\_2ug\_C1\_01\_1670

Scan

62064

Method

TOF; CID

Score

105.58

m/z

627.97

Gene names

VPS68

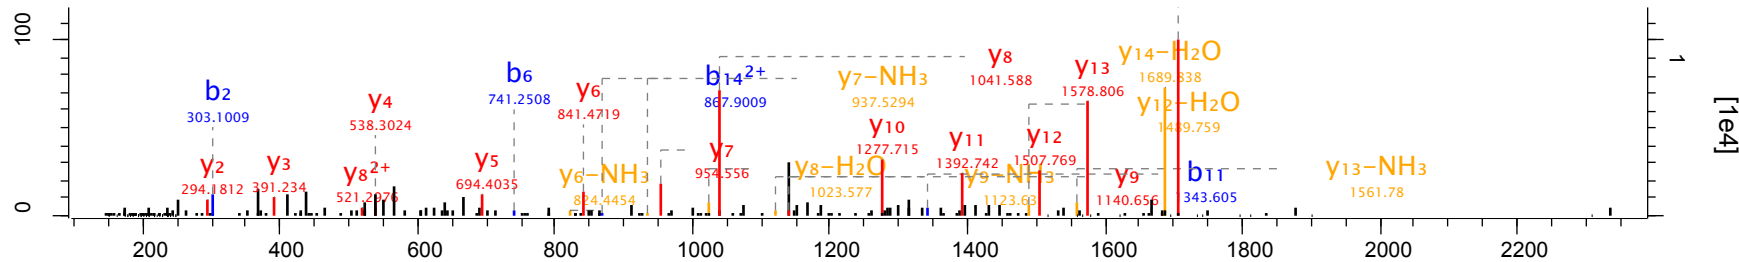

ac

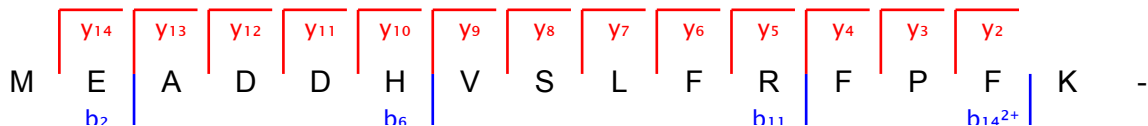

Raw file

20150306\_yeast1\_Top\_opt\_2ug\_C1\_01\_1670

Scan

62654

Method

TOF; CID

Score

104.17

m/z

735.38

Gene names

TOM7

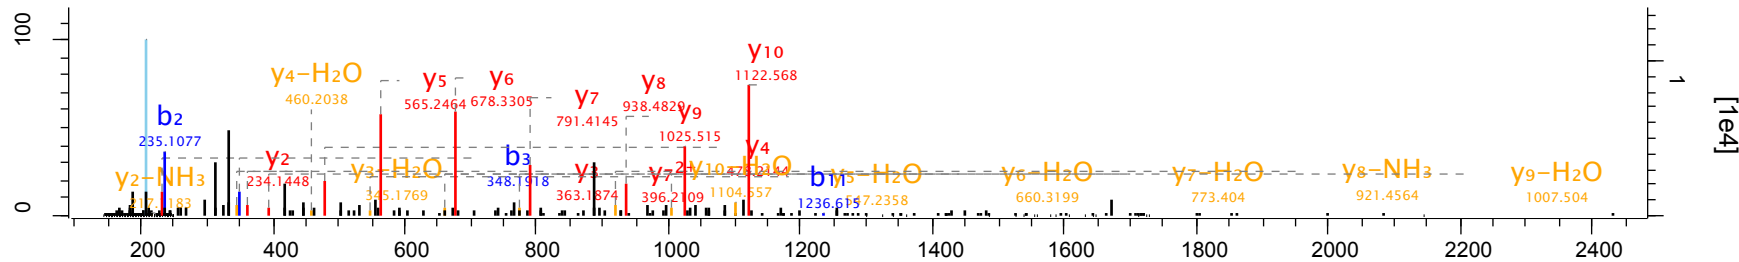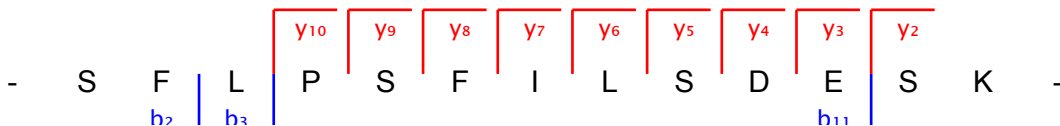

| Raw file                               | Scan  | Method   | Score | m/z     | Gene names |
|----------------------------------------|-------|----------|-------|---------|------------|
| 20150306_yeast1_Top_opt_2ug_C1_01_1670 | 63431 | TOF; CID | 92.26 | 1093.54 | PPH3       |

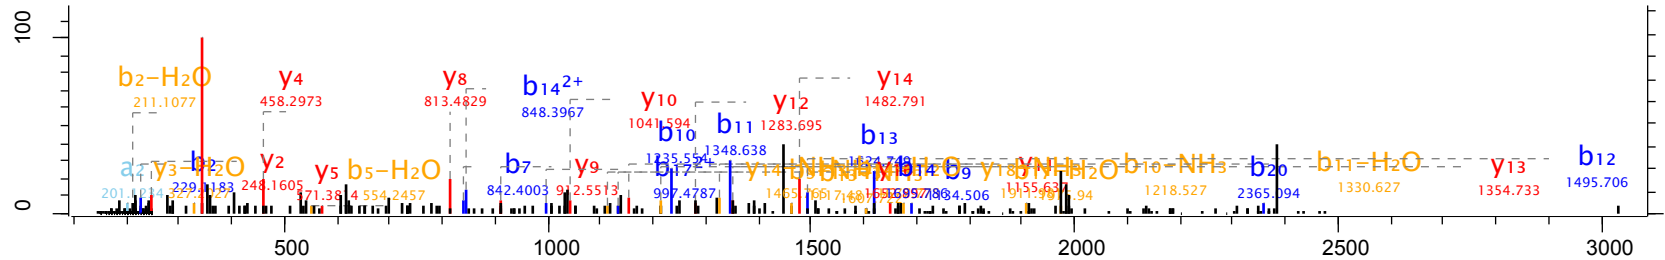

- I D D D L N R E Y T I F E A V Q A Q N E V

b<sub>2</sub> | b<sub>7</sub> | b<sub>9</sub> | b<sub>10</sub> | b<sub>11</sub> | b<sub>12</sub> | b<sub>13</sub> | b<sub>14</sub> | b<sub>17</sub><sup>2+</sup> | b<sub>20</sub>

y<sub>9</sub> | y<sub>10</sub> | y<sub>11</sub> | y<sub>12</sub> | y<sub>13</sub> | y<sub>14</sub> | y<sub>16</sub>

Raw file

Scan

Method

Score

m/z

Gene names

20150306\_yeast1\_Top\_opt\_2ug\_C1\_01\_1670

63859

TOF; CID

48.23

1127.57

JJJ2

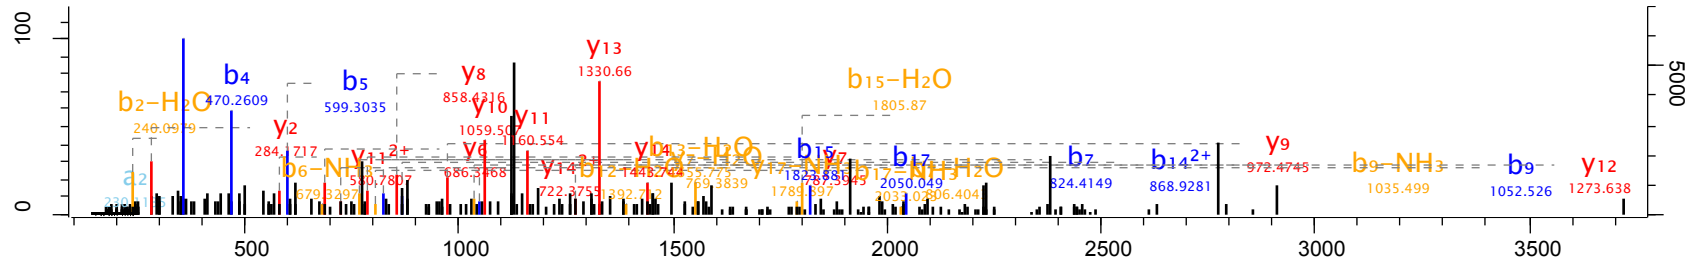

ac

S Q V I E P Q L D R T T Y Y S I L G L T S  
 a<sub>2</sub> b<sub>3</sub> b<sub>4</sub> b<sub>5</sub> h<sub>7</sub> b<sub>9</sub> h<sub>14</sub><sup>2+</sup> b<sub>15</sub> b<sub>17</sub>

Raw file

Scan

Method

Score

m/z

Gene names

20150306\_yeast1\_Top\_opt\_2ug\_C1\_01\_1670

66955

TOF; CID

67.93

1018.51

CIA1

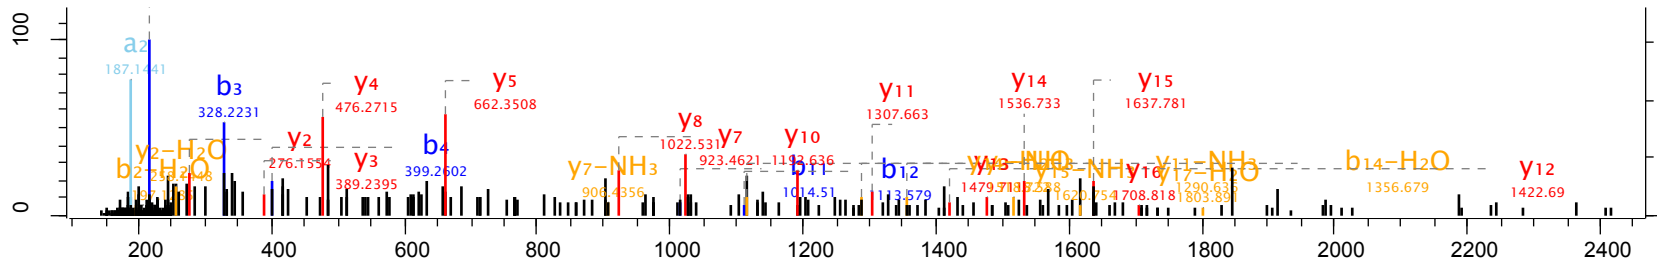

- T I L A T G G D D G I V N F W S L E K -

b<sub>2</sub> | b<sub>3</sub> | b<sub>4</sub> | y<sub>16</sub> | y<sub>15</sub> | y<sub>14</sub> | y<sub>13</sub> | y<sub>12</sub> | y<sub>11</sub> | y<sub>10</sub> | b<sub>11</sub> | b<sub>12</sub> | y<sub>8</sub> | y<sub>7</sub> | y<sub>5</sub> | y<sub>4</sub> | y<sub>3</sub> | y<sub>2</sub>

Raw file

20150306\_yeast1\_Top\_opt\_2ug\_C1\_01\_1670

Scan

69634

Method

TOF; CID

Score

151.52

m/z

754.43

Gene names

LSM5

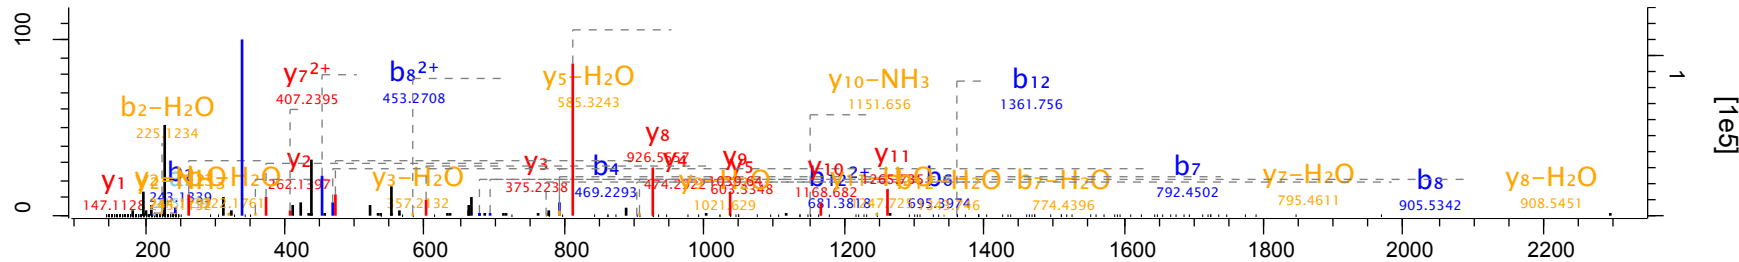

ac

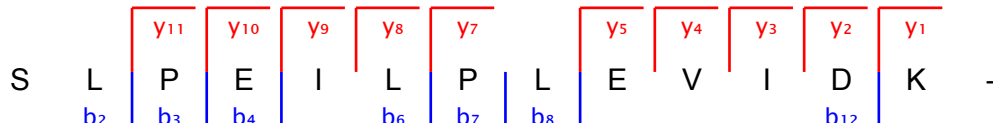

Raw file

Scan

Method

Score

m/z

Gene names

20150306\_yeast1\_Top\_opt\_2ug\_C1\_01\_1670

70145

TOF; CID

119.38

1008.54

SPC19

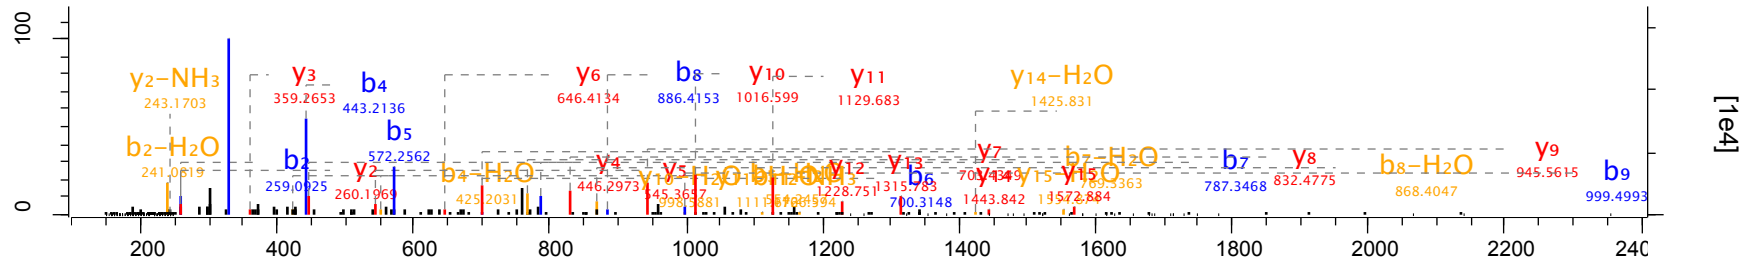

ac

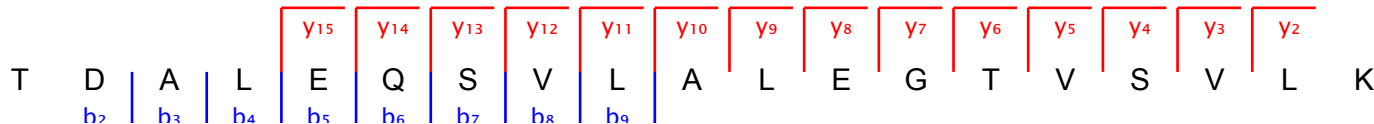



Raw file

Scan

Method

Score

m/z

Gene names

20150306\_yeast3\_Top\_opt\_2ug\_C3\_01\_1664

4882

TOF; CID

136.53

640.32

COX14

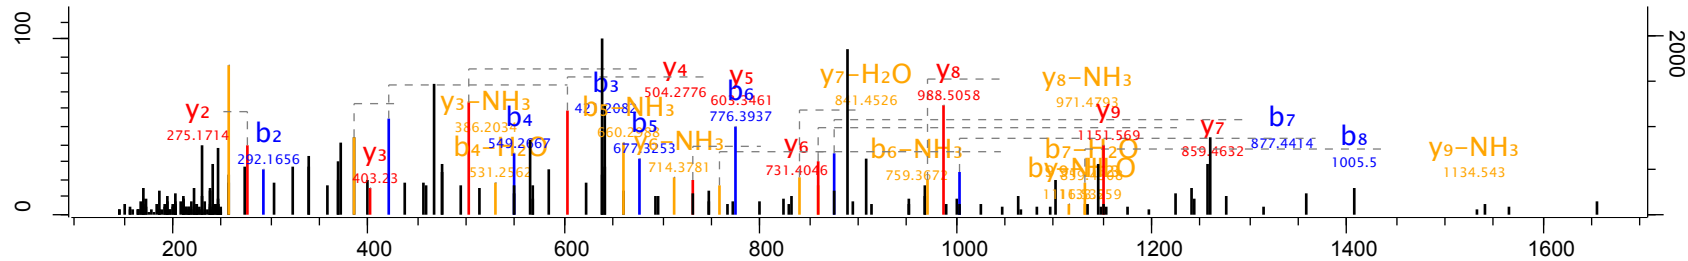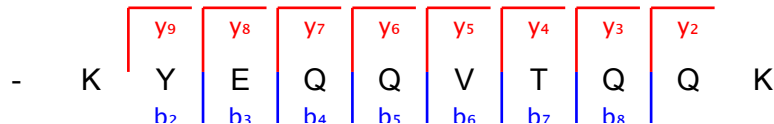

Raw file

Scan

Method

Score

m/z

Gene names

20150306\_yeast3\_Top\_opt\_2ug\_C3\_01\_1664

8025

TOF; CID

82.65

576.26

VPS20

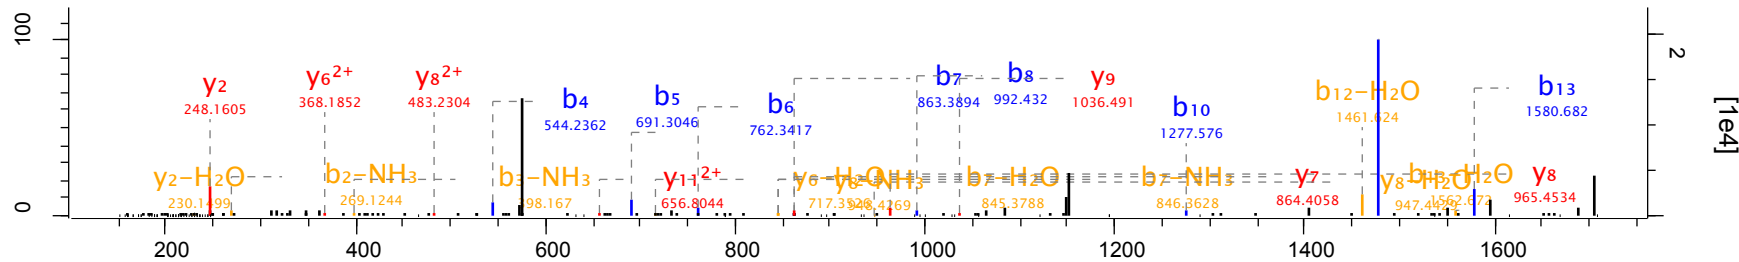

- E R E E F A T E E R S D T K -

h<sub>4</sub> h<sub>5</sub> h<sub>6</sub> h<sub>7</sub> h<sub>8</sub> h<sub>10</sub> h<sub>12</sub> h<sub>13</sub>

y<sub>11</sub><sup>2+</sup> y<sub>9</sub> y<sub>8</sub> y<sub>7</sub> y<sub>6</sub><sup>2+</sup> y<sub>2</sub>

Raw file

Scan

Method

Score

m/z

Gene names

20150306\_yeast3\_Top\_opt\_2ug\_C3\_01\_1664

9490

TOF; CID

102.07

549.27

COA3

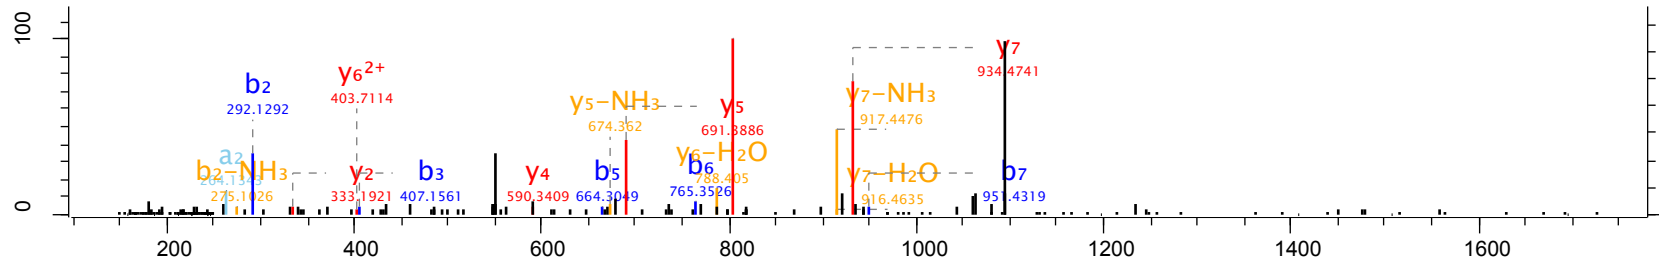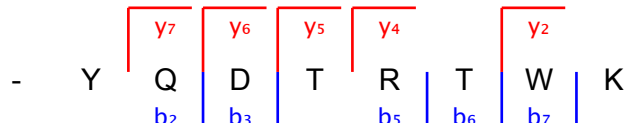

Raw file

Scan

Method

Score

m/z

20150306\_yeast3\_Top\_opt\_2ug\_C3\_01\_1664

10617

TOF; CID

94.31

599.77

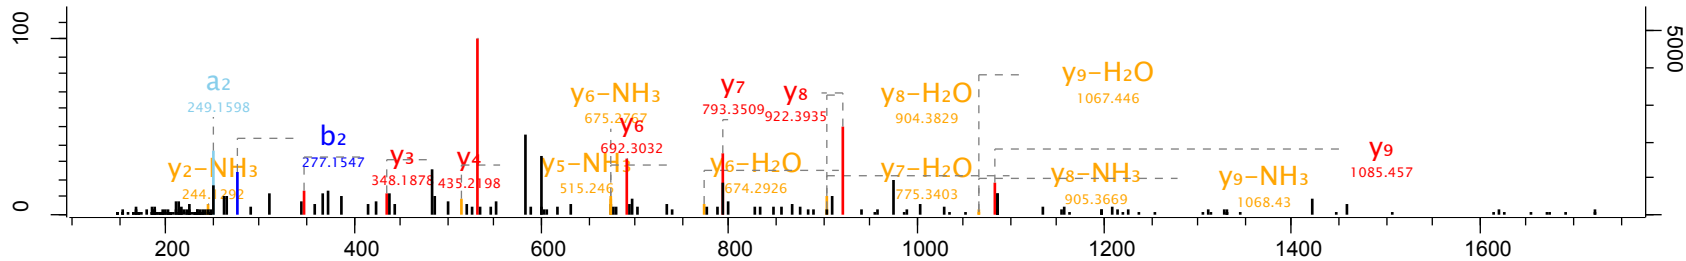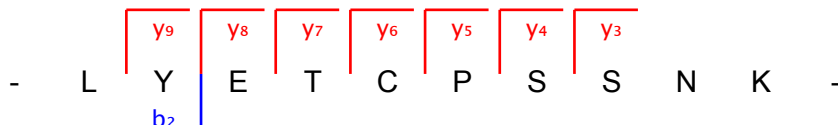

Raw file

Scan

Method

Score

m/z

Gene names

20150306\_yeast3\_Top\_opt\_2ug\_C3\_01\_1664

14603

TOF; CID

83.87

543.75

PRY3

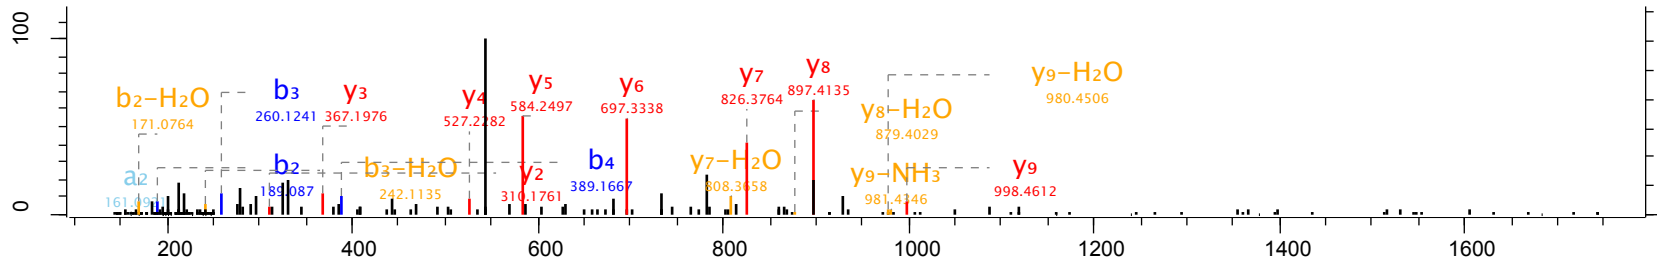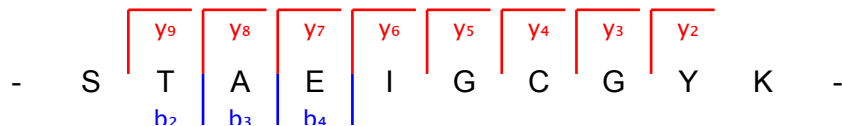

Raw file

Scan

Method

Score

m/z

Gene names

20150306\_yeast3\_Top\_opt\_2ug\_C3\_01\_1664

15502

TOF; CID

53.56

495.91

ISY1

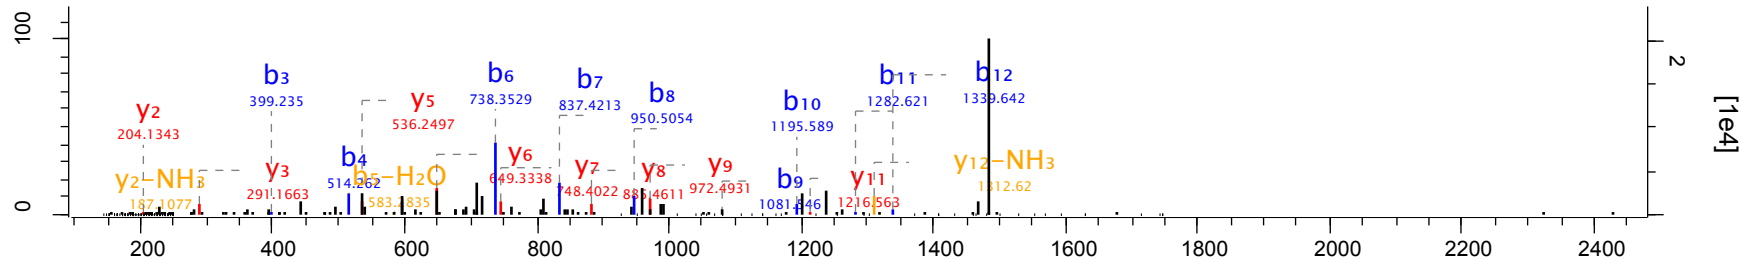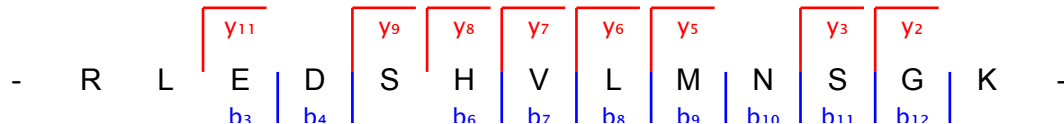

Raw file

20150306\_yeast3\_Top\_opt\_2ug\_C3\_01\_1664

Scan

15617

Method

TOF; CID

Score

83.69

m/z

525.92

Gene names

YLR149C

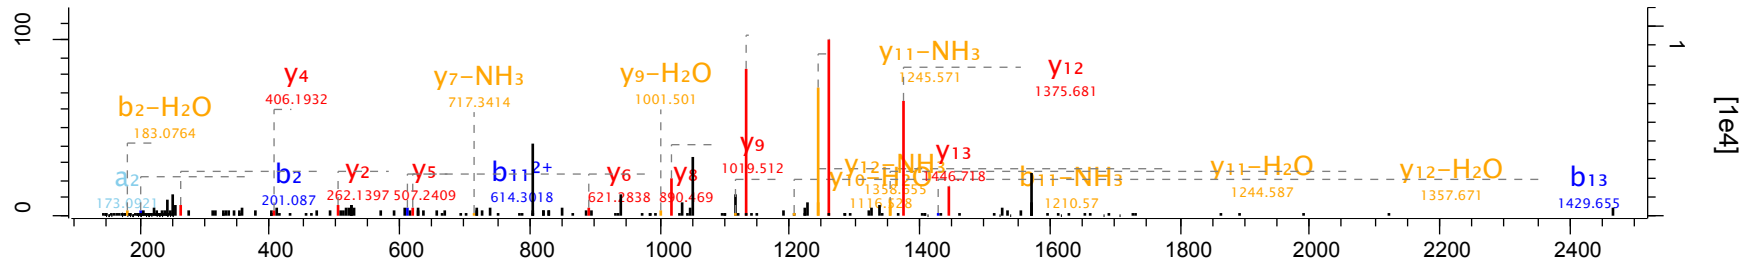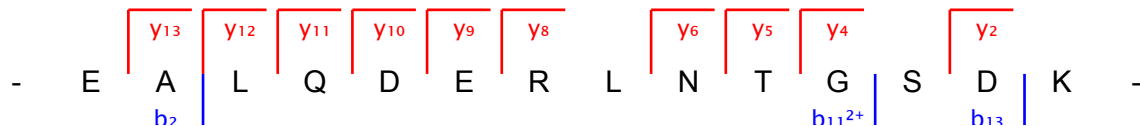

Raw file

Scan

Method

Score

m/z

Gene names

20150306\_yeast3\_Top\_opt\_2ug\_C3\_01\_1664

17705

TOF; CID

84.73

701.35

ARG80

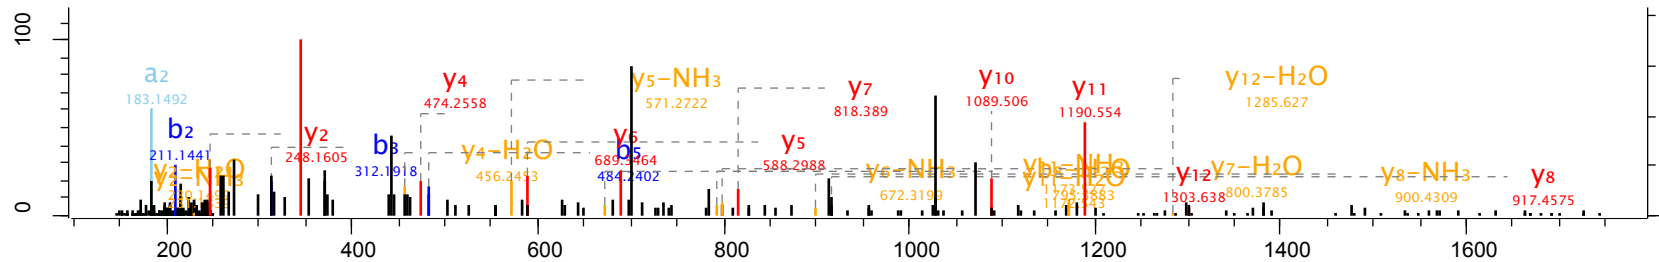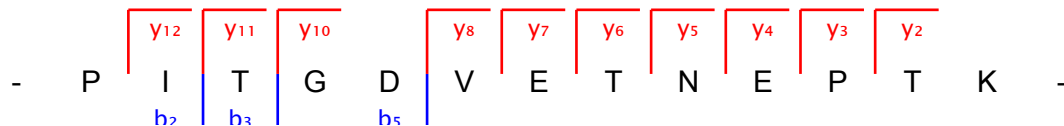



Raw file

20150306\_yeast3\_Top\_opt\_2ug\_C3\_01\_1664

Scan

21055

Method

TOF; CID

Score

67.75

m/z

634.34

Gene names

HOR7

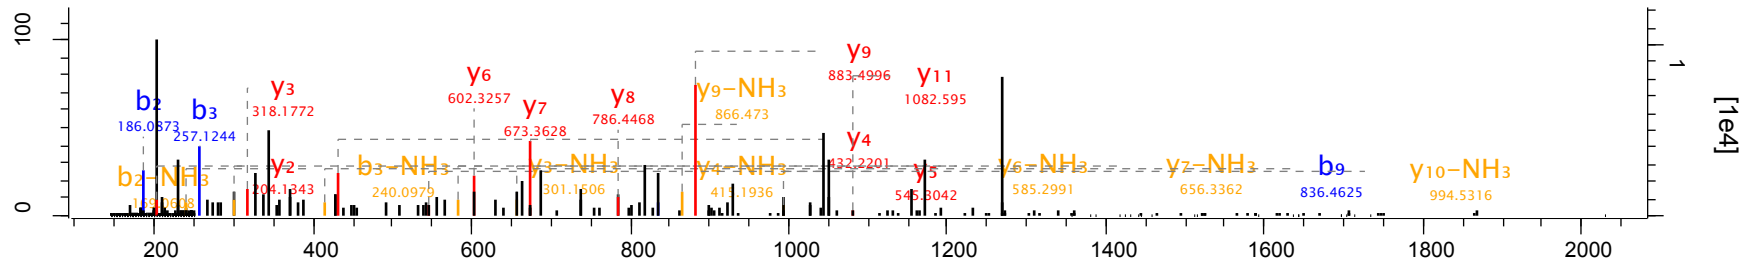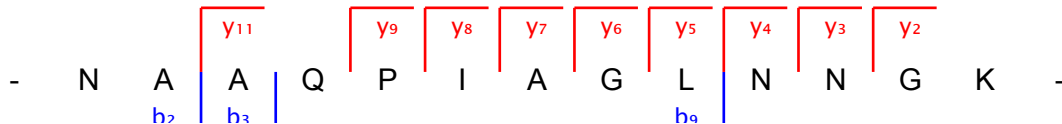

Raw file

Scan

Method

Score

m/z

Gene names

20150306\_yeast3\_Top\_opt\_2ug\_C3\_01\_1664

22060

TOF; CID

88.56

514.27

REX3

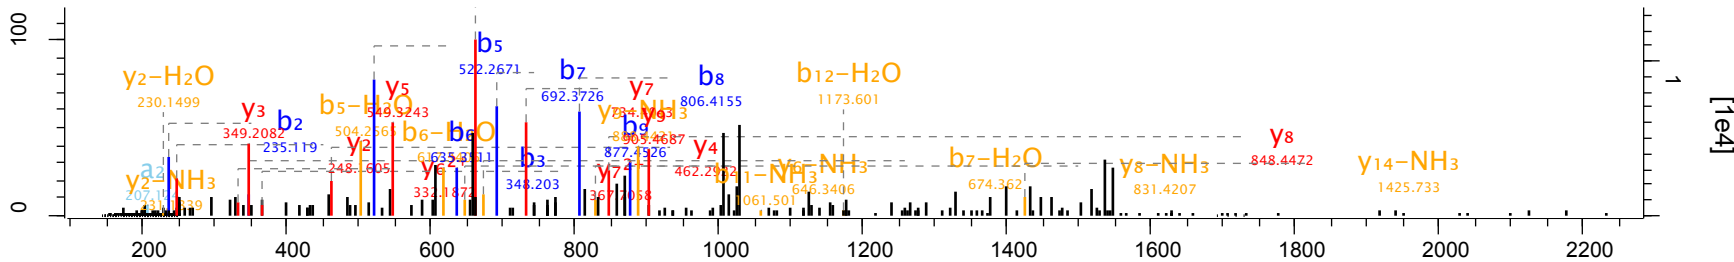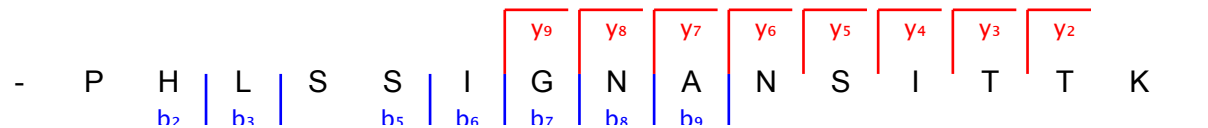

Raw file

Scan

Method

Score

m/z

Gene names

20150306\_yeast3\_Top\_opt\_2ug\_C3\_01\_1664

26039

TOF; CID

67.25

485.57

YPL088W

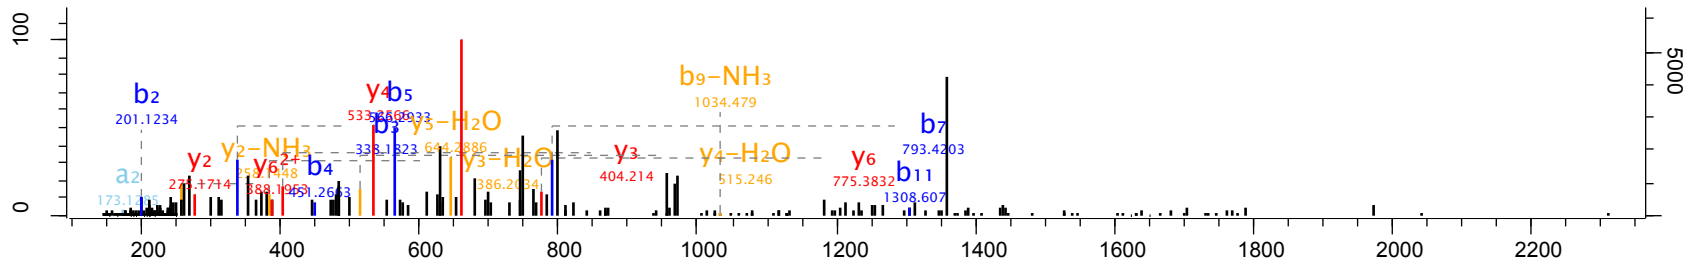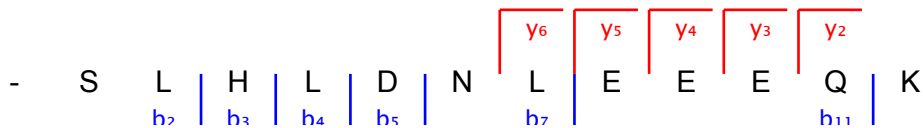

Raw file

Scan

Method

Score

m/z

Gene names

20150306\_yeast3\_Top\_opt\_2ug\_C3\_01\_1664

26783

TOF; CID

64.12

448.26

SMD1

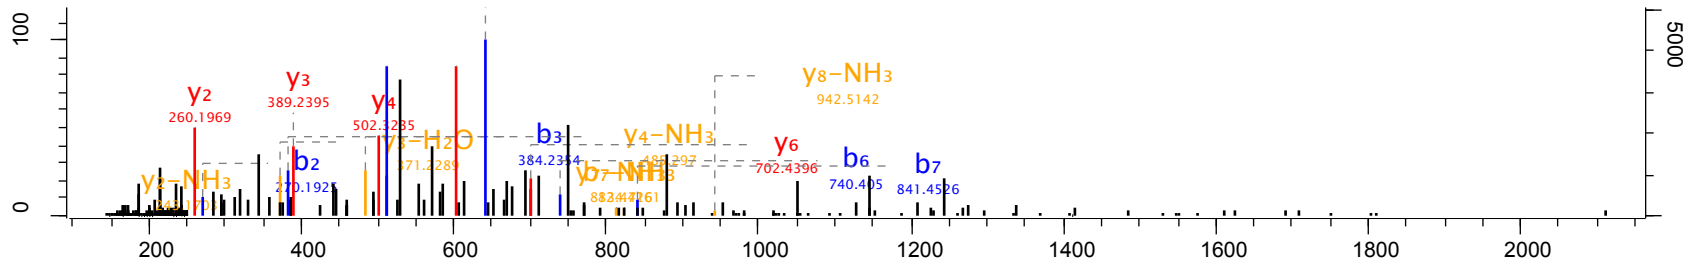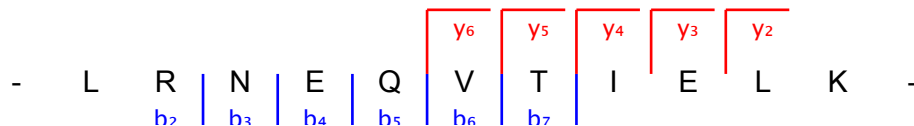

Raw file

20150306\_yeast3\_Top\_opt\_2ug\_C3\_01\_1664

Scan

28286

Method

TOF; CID

Score

130.01

m/z

971.43

Gene names

COX17

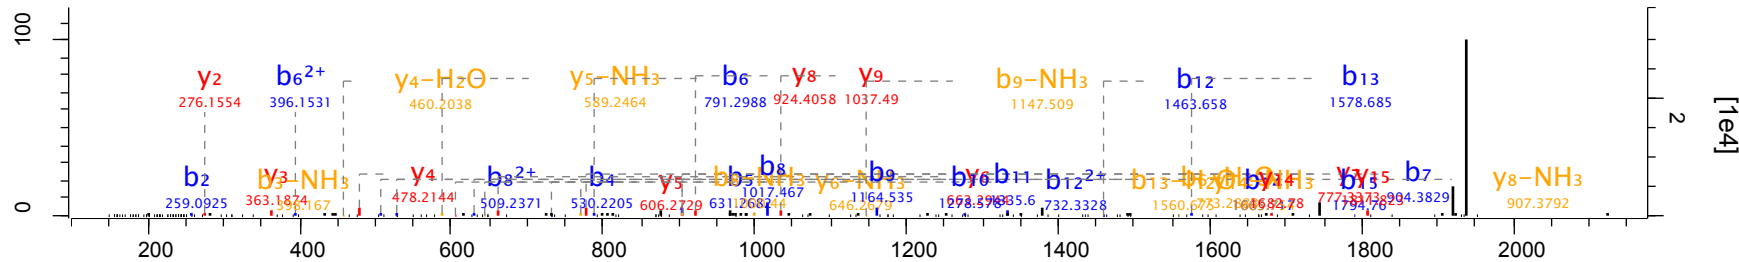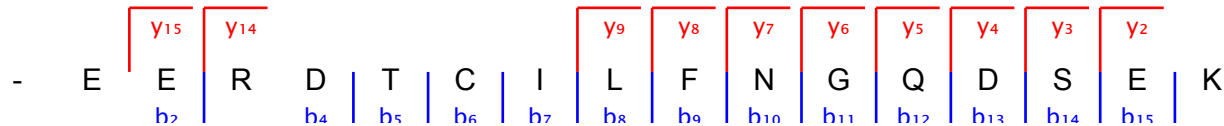

Raw file

Scan

Method

Score

m/z

Gene names

20150306\_yeast3\_Top\_opt\_2ug\_C3\_01\_1664

31614

TOF; CID

51.07

815.35

ALF1

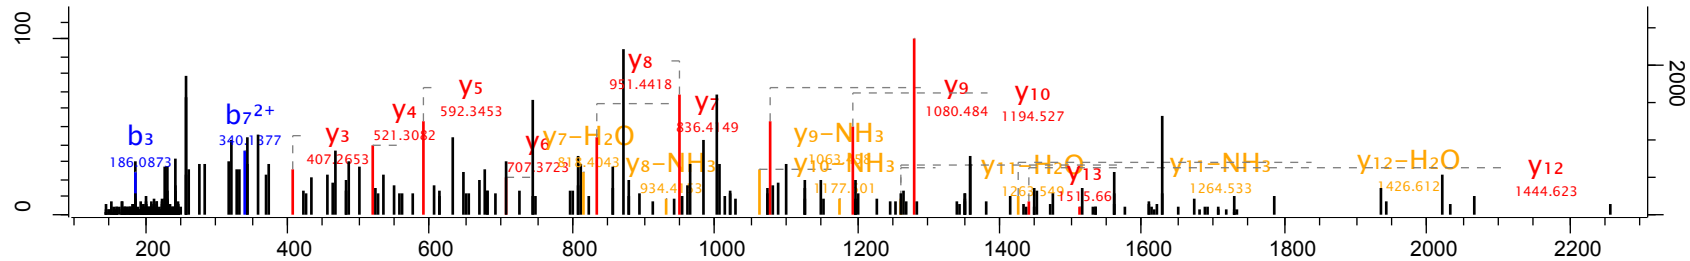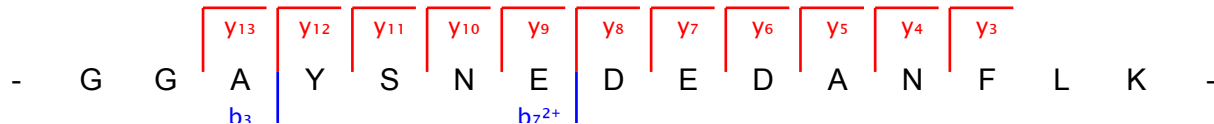

Raw file

20150306\_yeast3\_Top\_opt\_2ug\_C3\_01\_1664

Scan

33041

Method

TOF; CID

Score

56.4

m/z

601.8

Gene names

RAD16

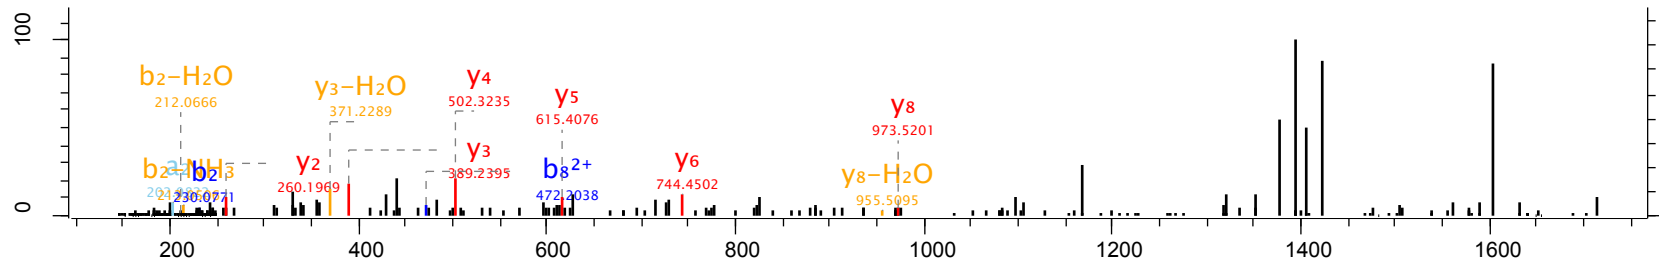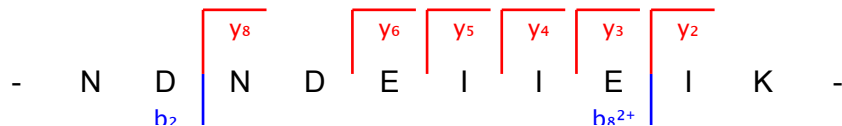

| Raw file                               | Scan  | Method   | Score | m/z    | Gene names |
|----------------------------------------|-------|----------|-------|--------|------------|
| 20150306_yeast3_Top_opt_2ug_C3_01_1664 | 33065 | TOF; CID | 94.72 | 586.95 | YIL156W-B  |

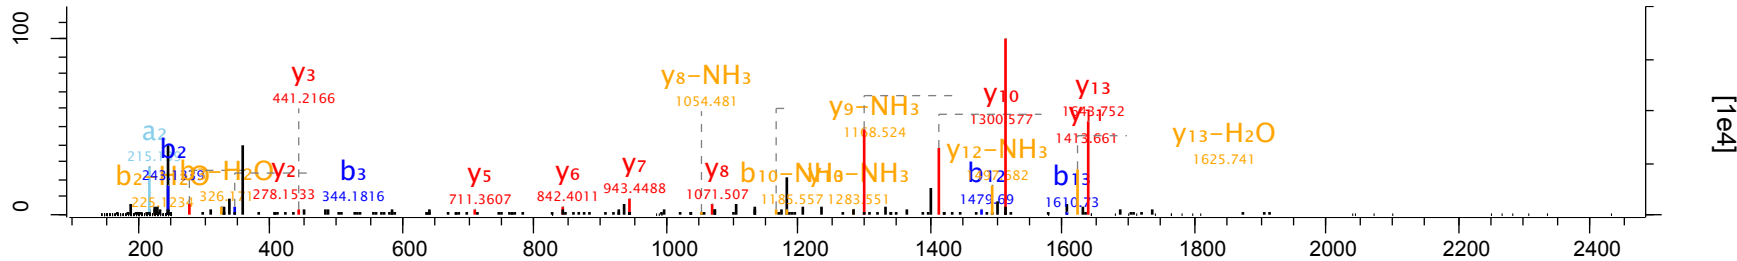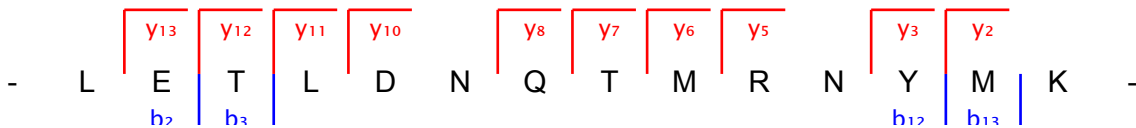



Raw file

Scan

Method

Score

m/z

Gene names

20150306\_yeast3\_Top\_opt\_2ug\_C3\_01\_1664

34344

TOF; CID

66.06

781.39

PRP38

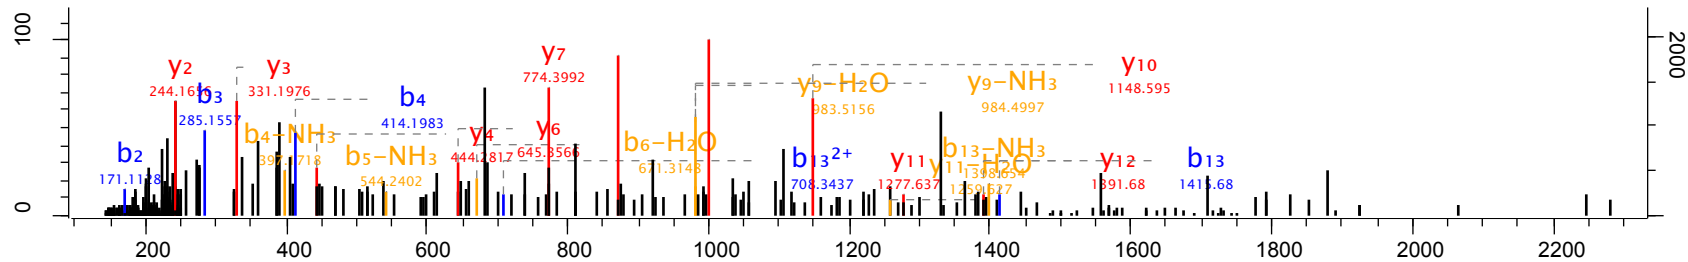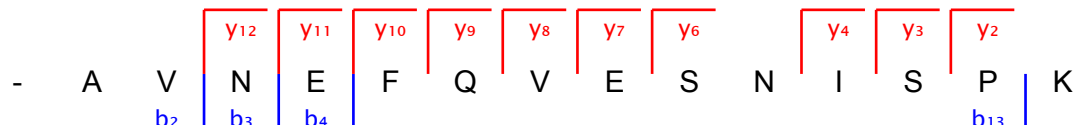

Raw file

Scan

Method

Score

m/z

Gene names

20150306\_yeast3\_Top\_opt\_2ug\_C3\_01\_1664

34381

TOF; CID

79.29

767.69

AKR2

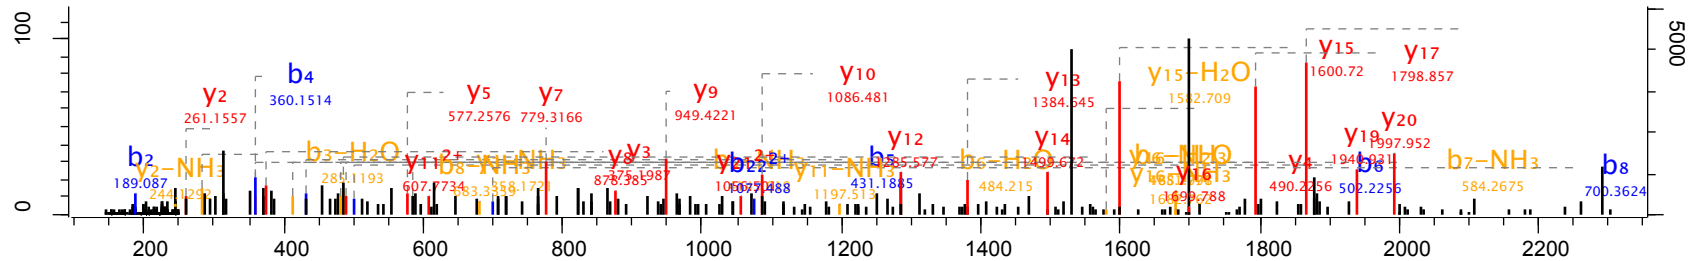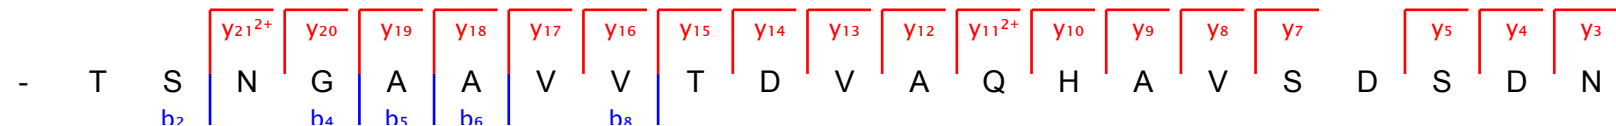

Raw file

20150306\_yeast3\_Top\_opt\_2ug\_C3\_01\_1664

Scan

38873

Method

TOF; CID

Score

123.55

m/z

1157.99

Gene names

COX23

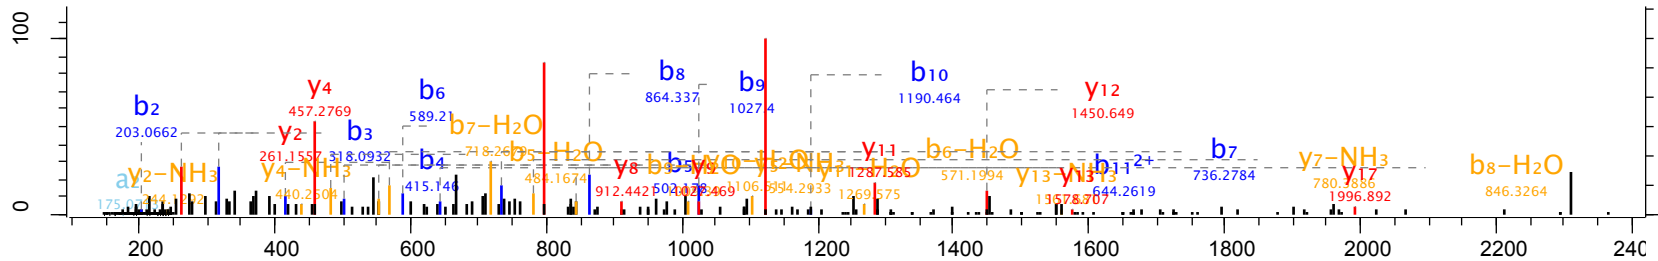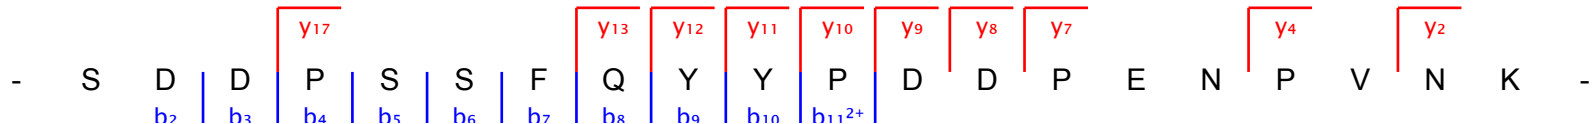

Raw file

20150306\_yeast3\_Top\_opt\_2ug\_C3\_01\_1664

Scan

42040

Method

TOF; CID

Score

122.53

m/z

998.46

Gene names

MRPL36

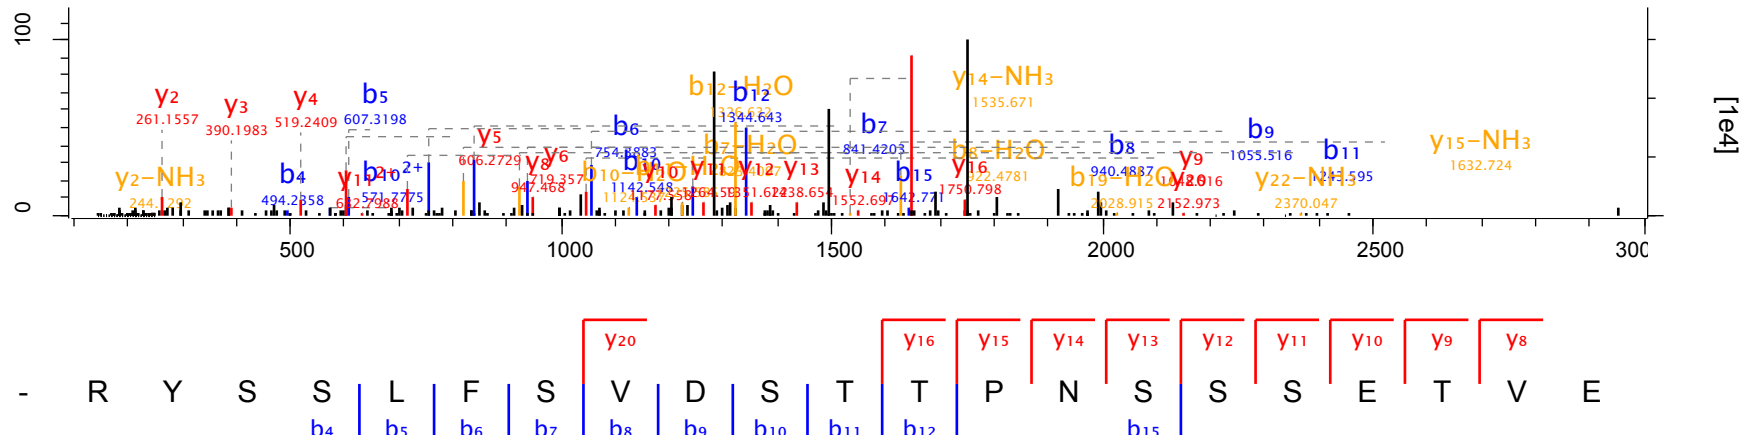

Raw file

Scan

Method

Score

m/z

Gene names

20150306\_yeast3\_Top\_opt\_2ug\_C3\_01\_1664

42797

TOF; CID

39.43

528.28

TEA1

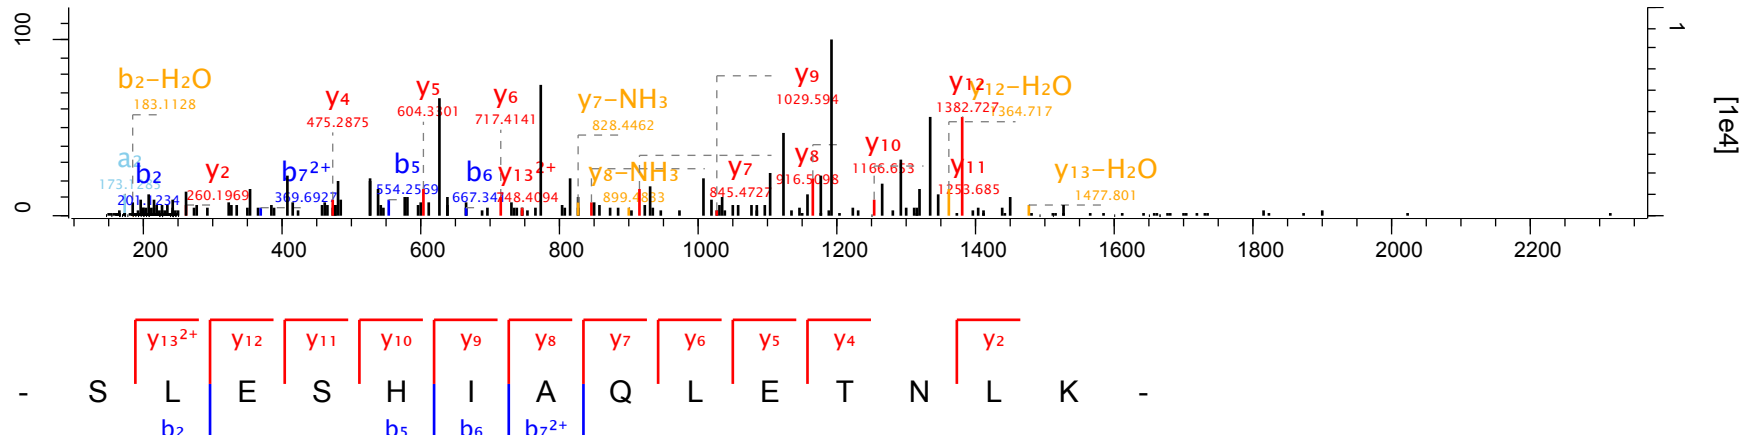

Raw file

20150306\_yeast3\_Top\_opt\_2ug\_C3\_01\_1664

Scan

43067

Method

TOF; CID

Score

109.15

m/z

517.61

Gene names

POP2

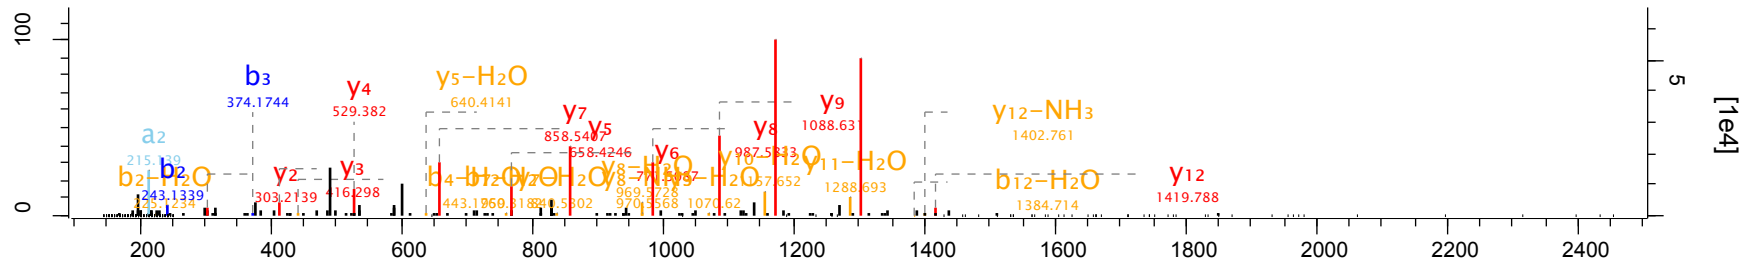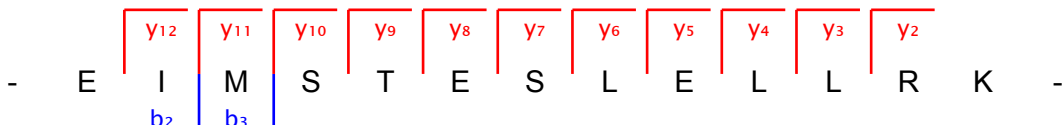

Raw file

Scan

Method

Score

m/z

Gene names

20150306\_yeast3\_Top\_opt\_2ug\_C3\_01\_1664

48107

TOF; CID

62.01

694.81

MRPL44

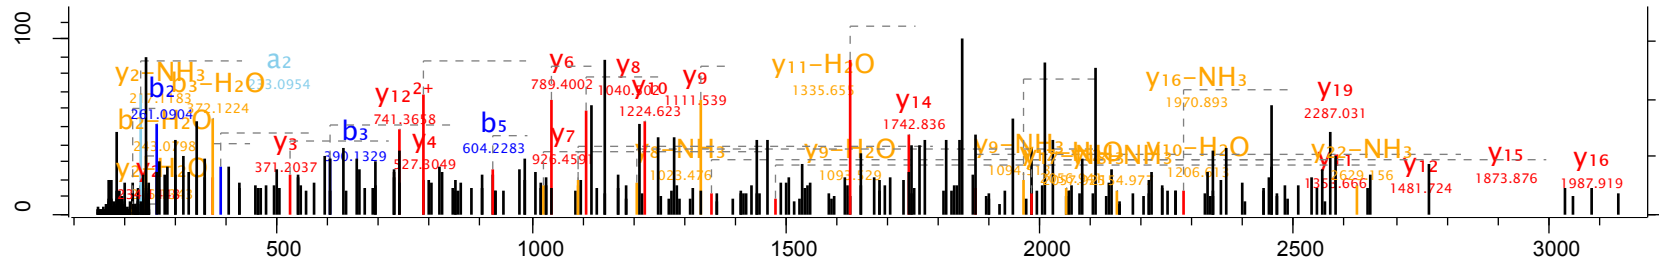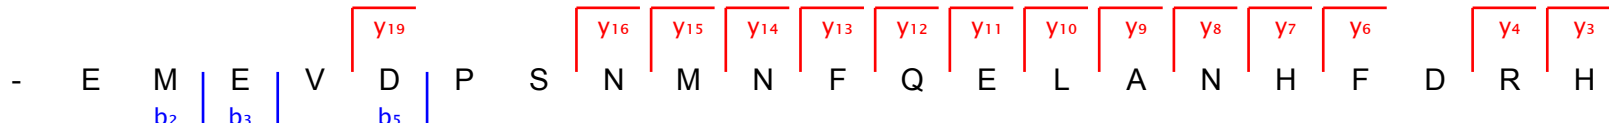

Raw file

20150306\_yeast3\_Top\_opt\_2ug\_C3\_01\_1664

Scan

48644

Method

TOF; CID

Score

159.58

m/z

511.28

Gene names

MCM22

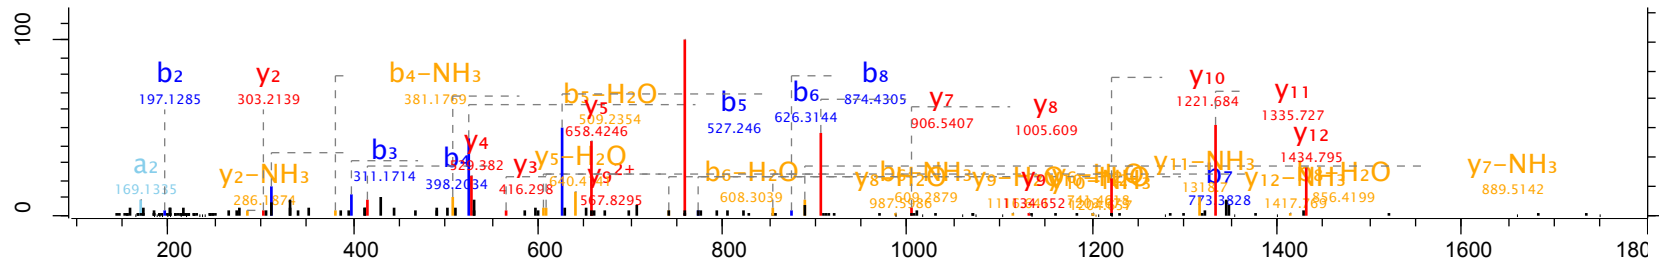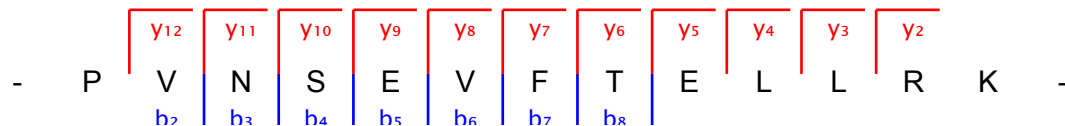



Raw file

Scan

Method

Score

m/z

Gene names

20150306\_yeast3\_Top\_opt\_2ug\_C3\_01\_1664

66358

TOF; CID

83.25

1173.6

YDL180W

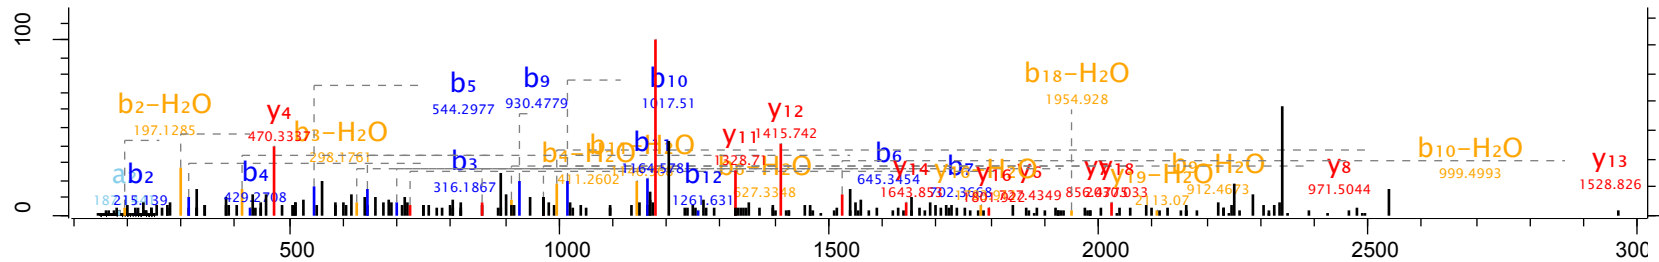

- L T T L D T G D L S F P I D E E Q P I L K

h<sub>2</sub> h<sub>3</sub> h<sub>4</sub> h<sub>5</sub> h<sub>6</sub> h<sub>7</sub> h<sub>9</sub> h<sub>10</sub> h<sub>11</sub> h<sub>12</sub>

y<sub>18</sub> y<sub>16</sub> y<sub>14</sub> y<sub>13</sub> y<sub>12</sub> y<sub>11</sub> y<sub>10</sub> y<sub>8</sub> y<sub>7</sub> y<sub>6</sub> y<sub>4</sub>

Raw file

20150306\_yeast3\_Top\_opt\_2ug\_C3\_01\_1664

Scan

68059

Method

TOF; CID

Score

52.5

m/z

762.38

Gene names

MRP17

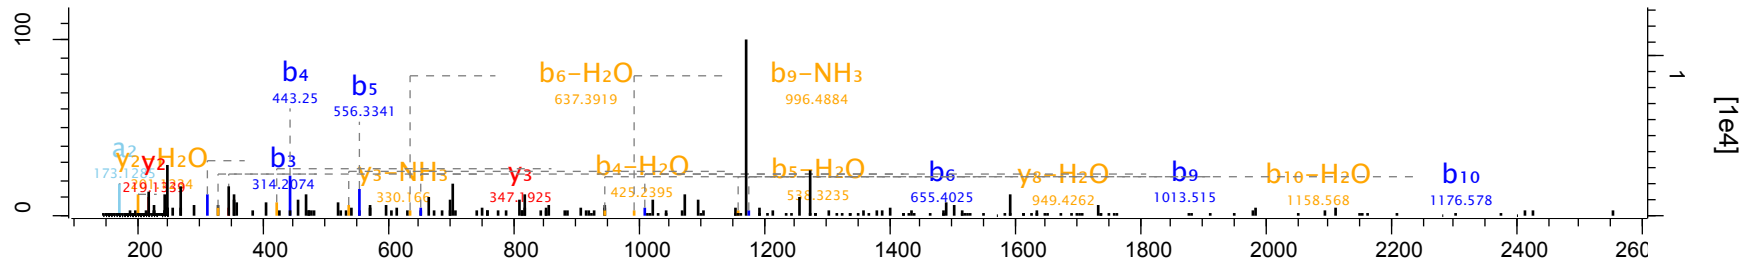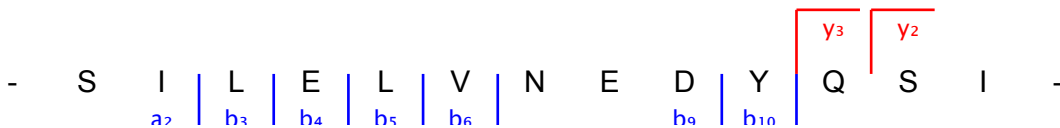

Raw file

20150306\_yeast3\_Top\_opt\_2ug\_C3\_01\_1664

Scan

70746

Method

TOF; CID

Score

87.18

m/z

689.94

Gene names

YLR099W-A

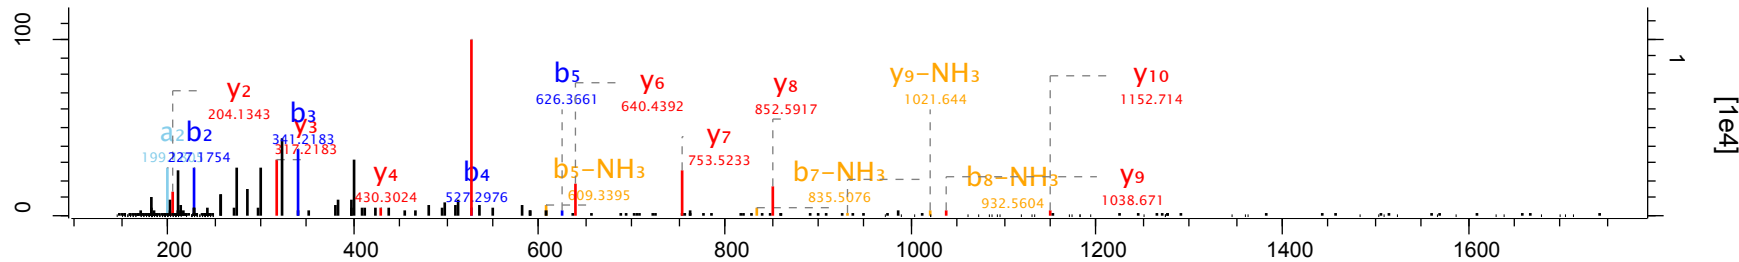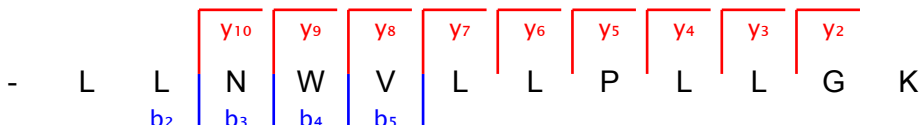

Raw file

Scan

Method

Score

m/z

Gene names

20150306\_yeast3\_Top\_opt\_2ug\_C3\_01\_1664

72557

TOF; CID

125.31

870.14

HTZ1

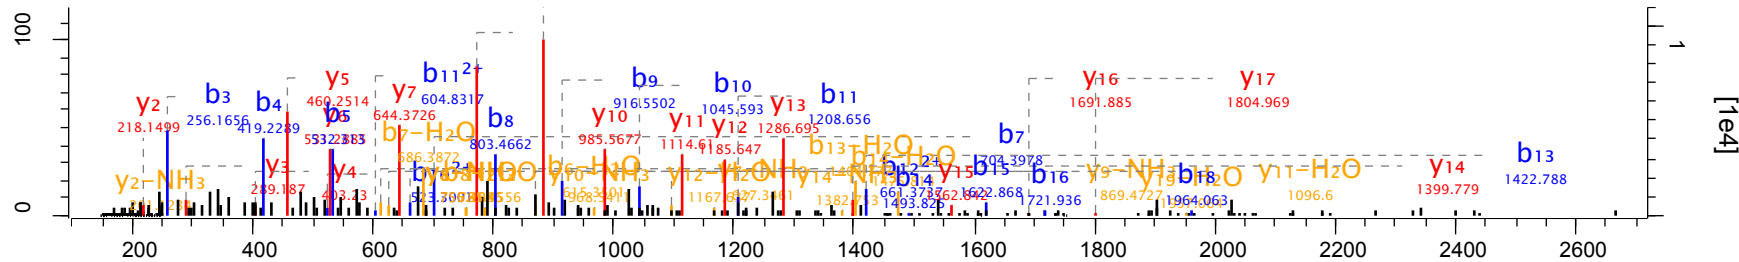

- A A I Y L T A V L E Y L T A E V L E L A G

h<sub>3</sub> h<sub>4</sub> h<sub>5</sub> h<sub>7</sub> h<sub>8</sub> h<sub>9</sub> h<sub>10</sub> h<sub>11</sub> h<sub>12</sub><sup>2+</sup> h<sub>13</sub> h<sub>14</sub> h<sub>15</sub> h<sub>16</sub> h<sub>18</sub>

y<sub>17</sub> y<sub>16</sub> y<sub>15</sub> y<sub>14</sub> y<sub>13</sub> y<sub>12</sub> y<sub>11</sub> y<sub>10</sub> y<sub>9</sub> y<sub>8</sub> y<sub>7</sub> y<sub>6</sub> y<sub>5</sub>

Raw file

Scan

Method

Score

m/z

Gene names

20150306\_yeast3\_Top\_opt\_2ug\_C3\_01\_1665

6370

TOF; CID

79.81

424.68

PKR1

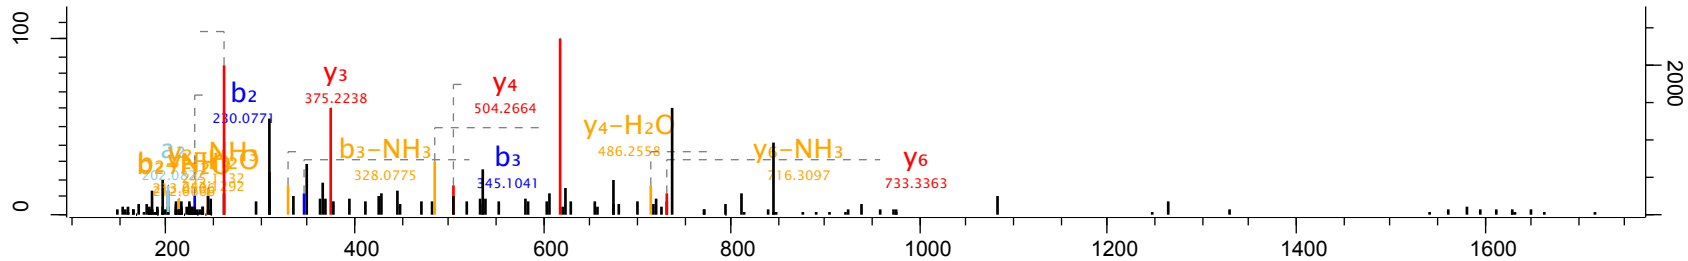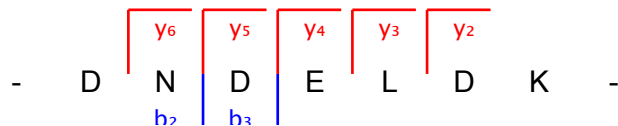

Raw file

Scan

Method

Score

m/z

Gene names

20150306\_yeast3\_Top\_opt\_2ug\_C3\_01\_1665

8992

TOF; CID

100.07

661.27

QCR9

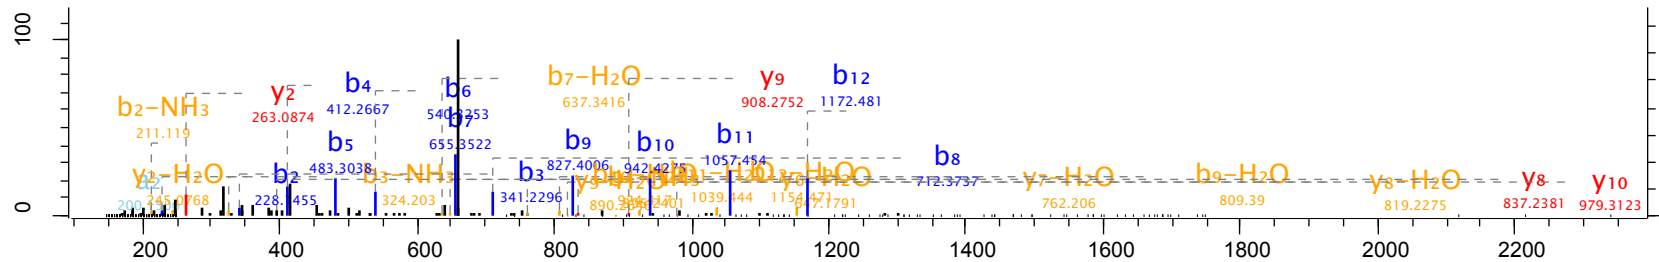

[1e4]

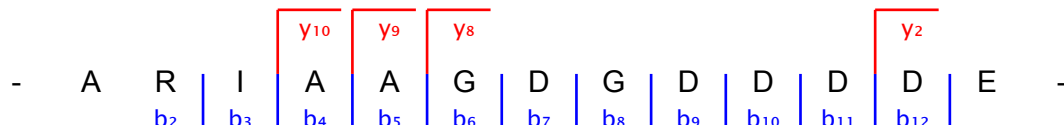

Raw file

Scan

Method

Score

m/z

Gene names

20150306\_yeast3\_Top\_opt\_2ug\_C3\_01\_1665

9144

TOF; CID

64.83

590.29

NCA3

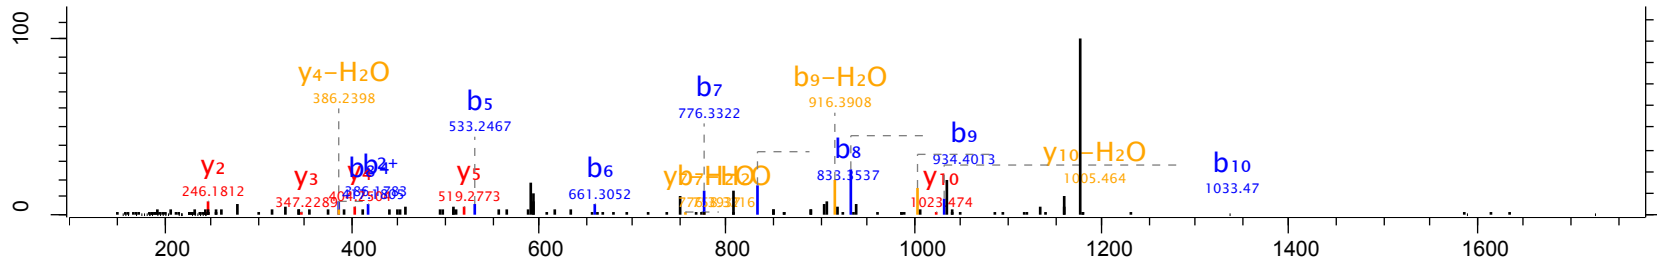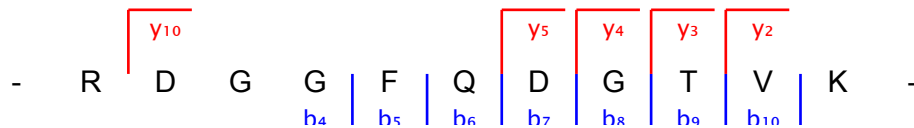

Raw file

Scan

Method

Score

m/z

Gene names

20150306\_yeast3\_Top\_opt\_2ug\_C3\_01\_1665

9275

TOF; CID

76.83

707.33

IFM1

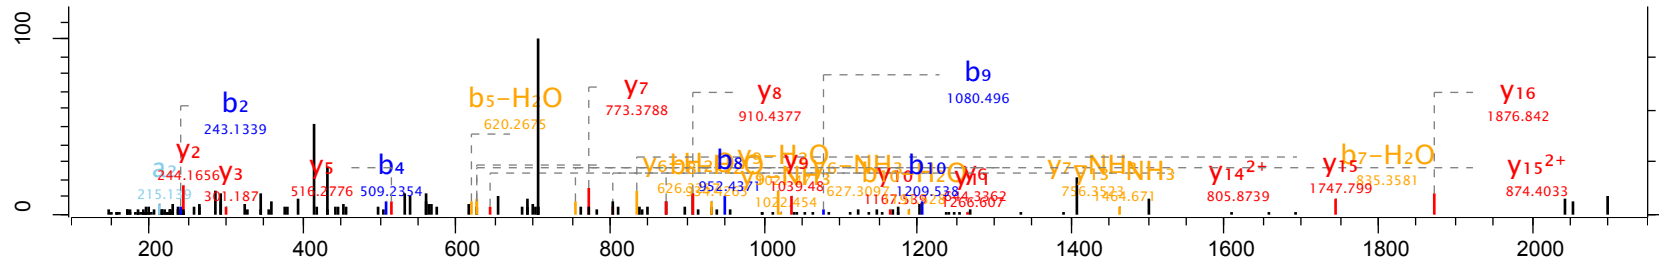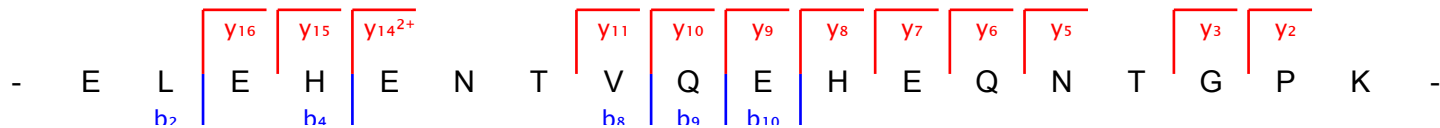



Raw file

Scan

Method

Score

m/z

Gene names

20150306\_yeast3\_Top\_opt\_2ug\_C3\_01\_1665

13616

TOF; CID

90.79

664.8

ESA1

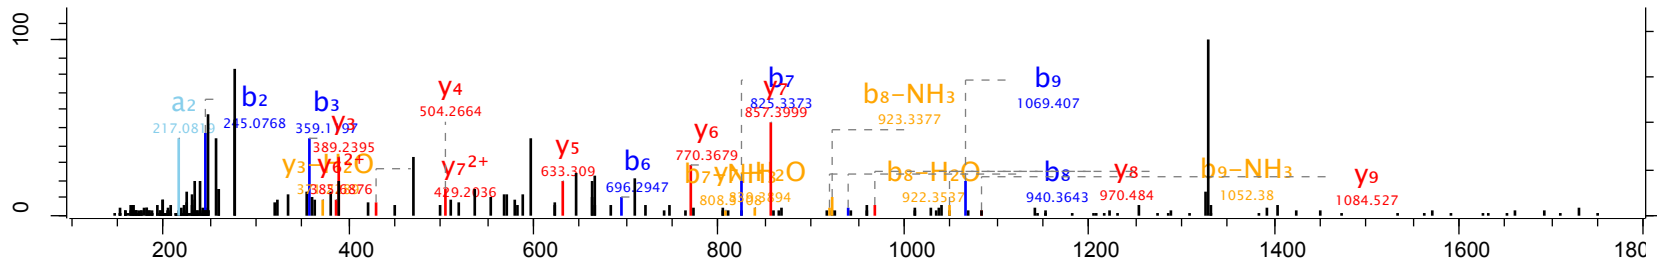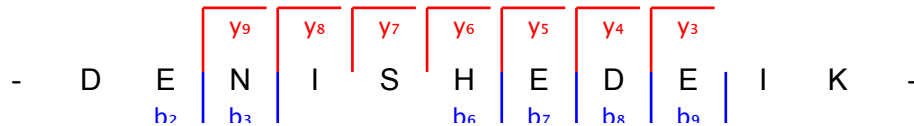

Raw file

Scan

Method

Score

m/z

Gene names

20150306\_yeast3\_Top\_opt\_2ug\_C3\_01\_1665

17648

TOF; CID

66.57

524.76

GPI12

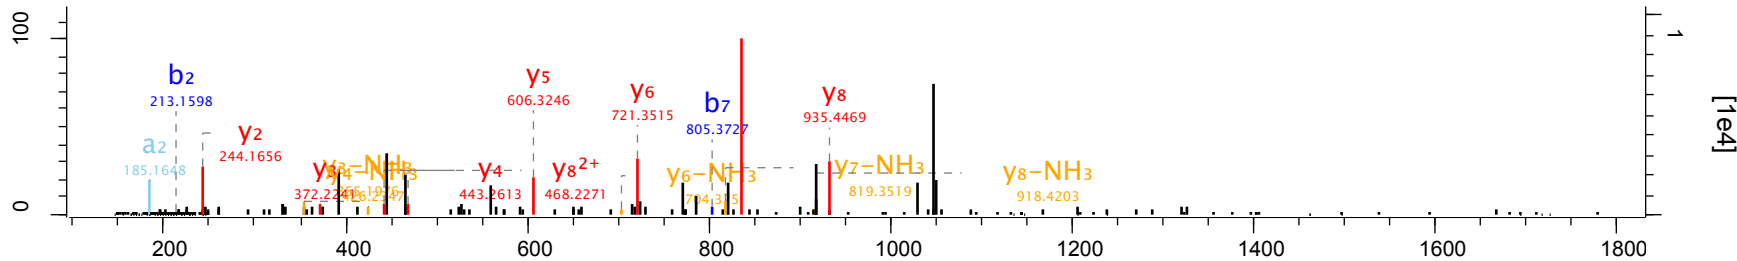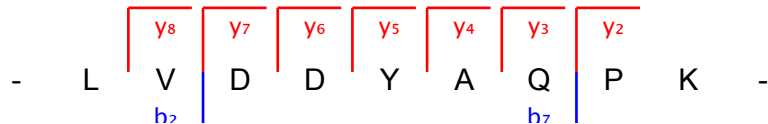

Raw file

Scan

Method

Score

m/z

Gene names

20150306\_yeast3\_Top\_opt\_2ug\_C3\_01\_1665

18151

TOF; CID

91.36

555.25

IBD2

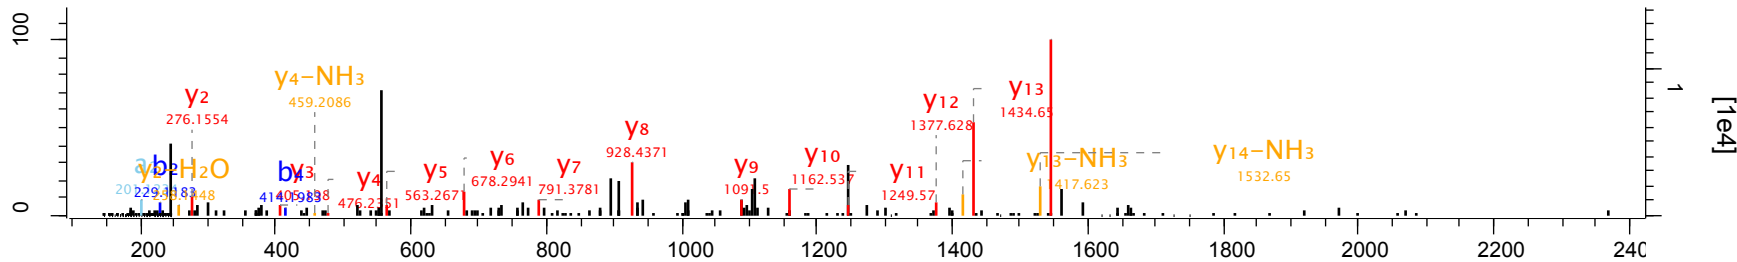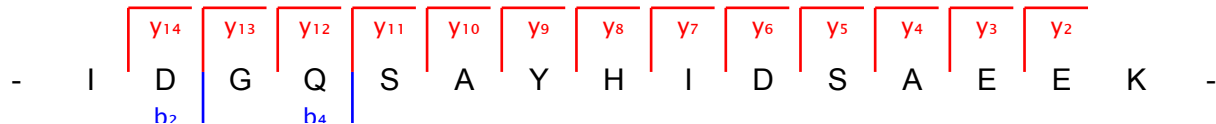

Raw file

Scan

Method

Score

m/z

Gene names

20150306\_yeast3\_Top\_opt\_2ug\_C3\_01\_1665

20370

TOF; CID

44.74

808.36

BIT61

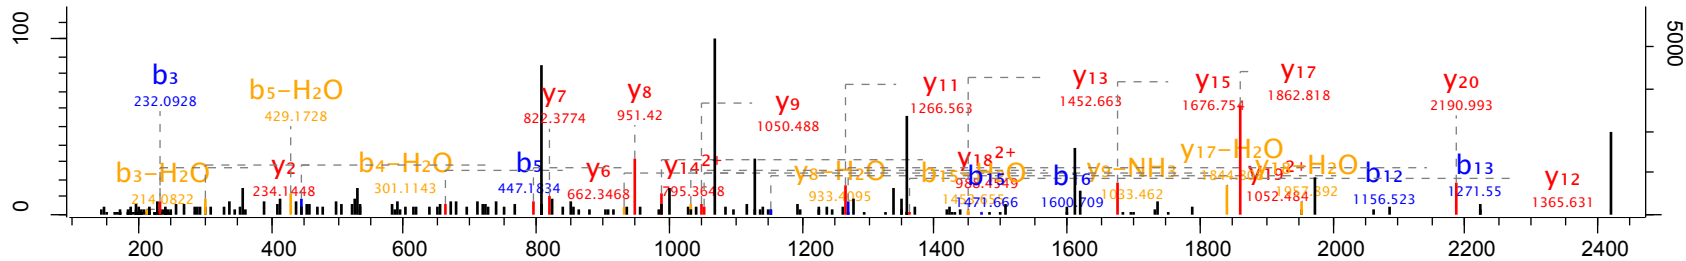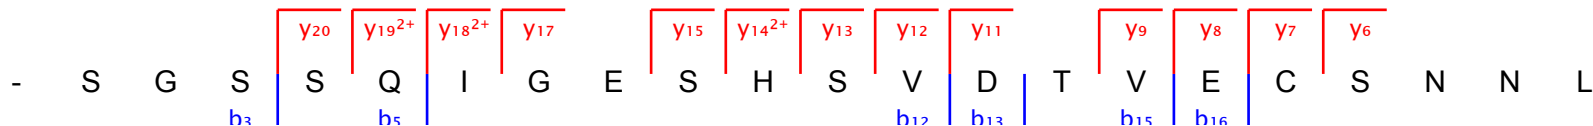

Raw file

Scan

Method

Score

m/z

Gene names

20150306\_yeast3\_Top\_opt\_2ug\_C3\_01\_1665

21394

TOF; CID

40.48

500.25

PRP11

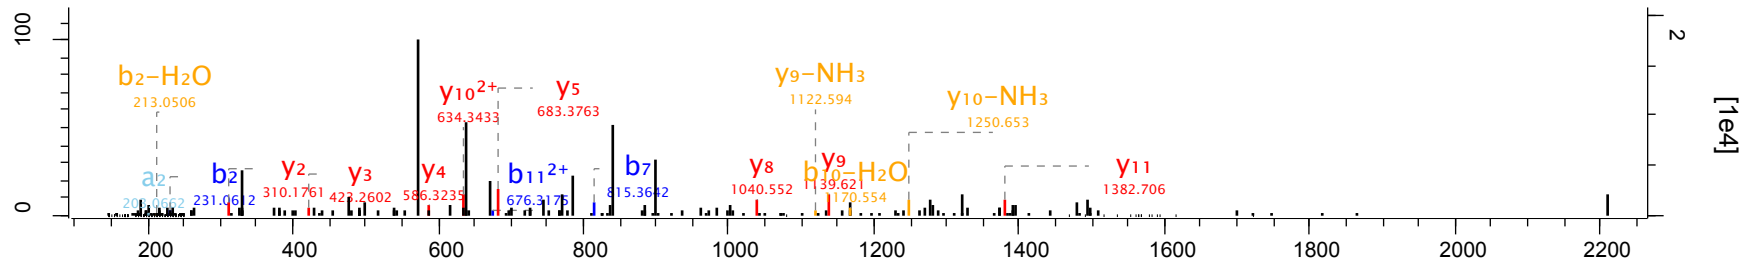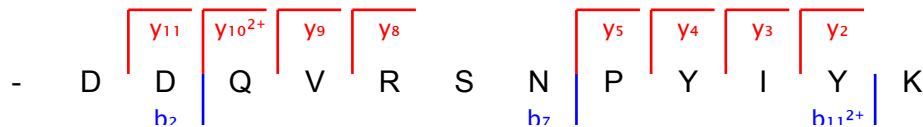

Raw file

20150306\_yeast3\_Top\_opt\_2ug\_C3\_01\_1665

Scan

23230

Method

TOF; CID

Score

50.24

m/z

763.01

Gene names

PHO80

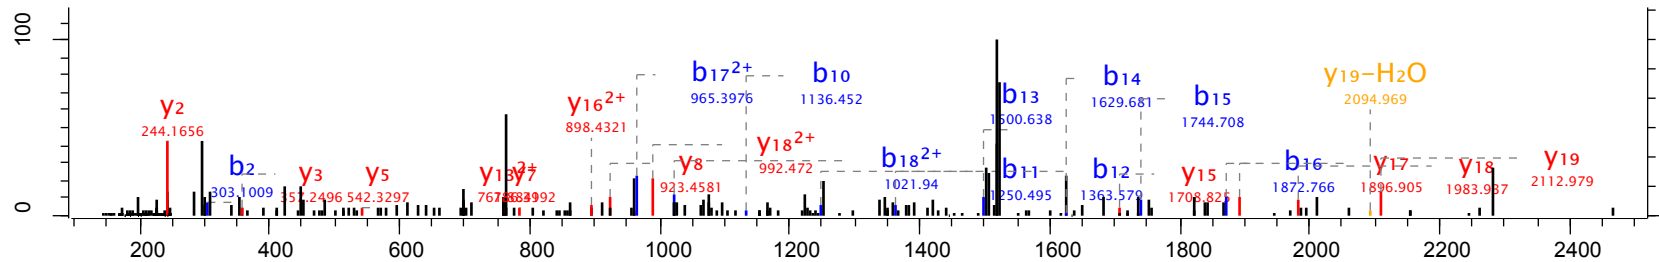

ac

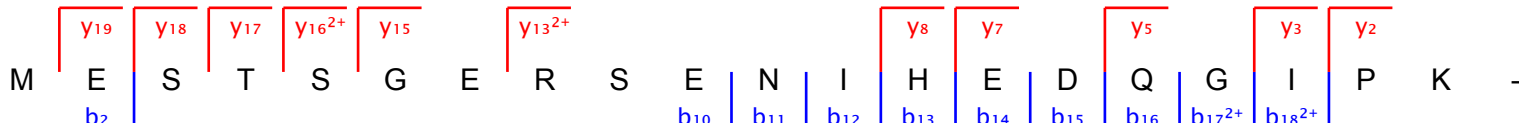

Raw file

Scan

Method

Score

m/z

Gene names

20150306\_yeast3\_Top\_opt\_2ug\_C3\_01\_1665

25380

TOF; CID

68.97

669.31

DBF20

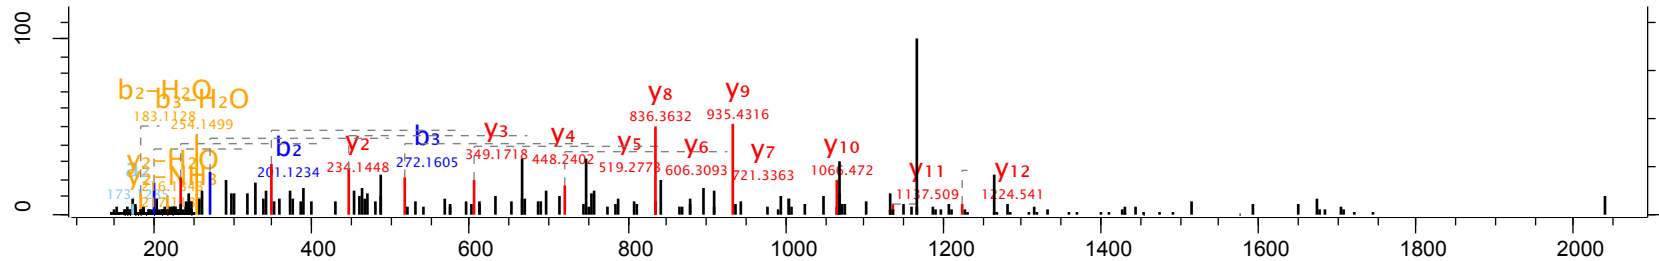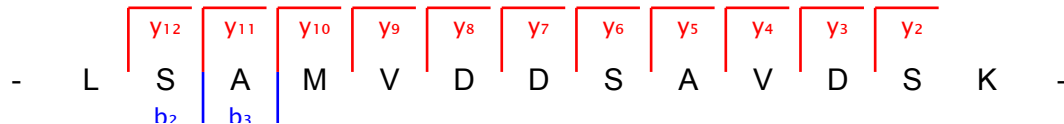

Raw file

Scan

Method

Score

m/z

Gene names

20150306\_yeast3\_Top\_opt\_2ug\_C3\_01\_1665

30355

TOF; CID

95.07

911.4

VPS34

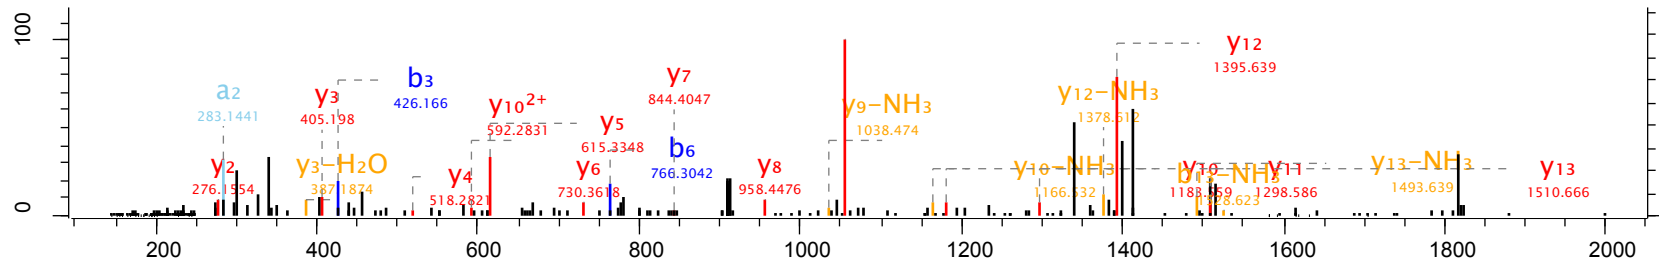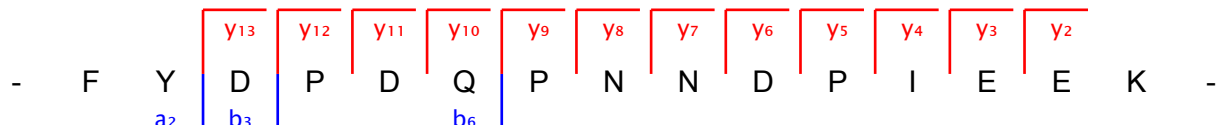



Raw file

20150306\_yeast3\_Top\_opt\_2ug\_C3\_01\_1665

Scan

32505

Method

TOF; CID

Score

148.28

m/z

596.81

Gene names

FEN1

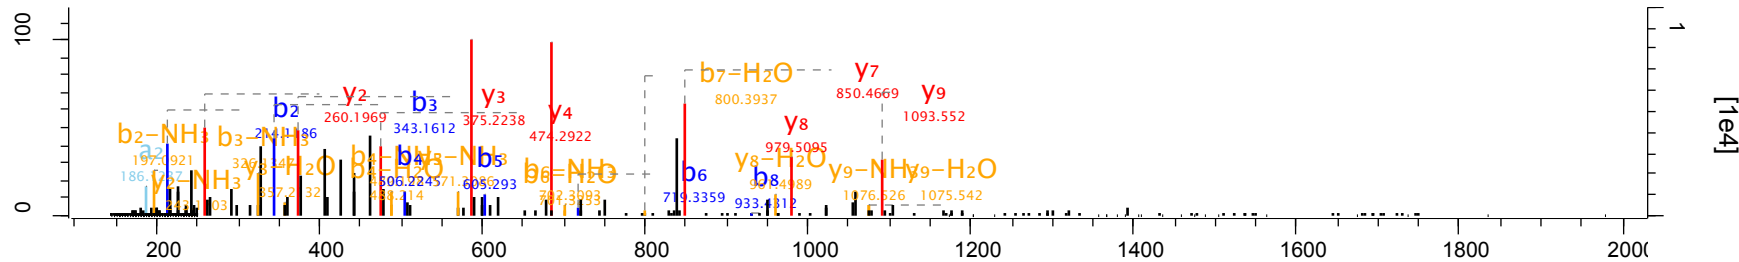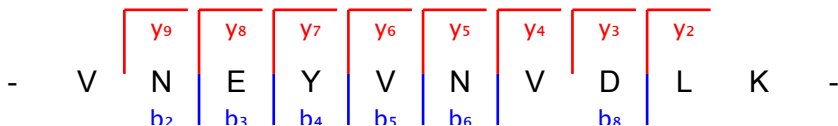

Raw file

Scan

Method

Score

m/z

Gene names

20150306\_yeast3\_Top\_opt\_2ug\_C3\_01\_1665

33445

TOF; CID

52.52

688.32

COA4

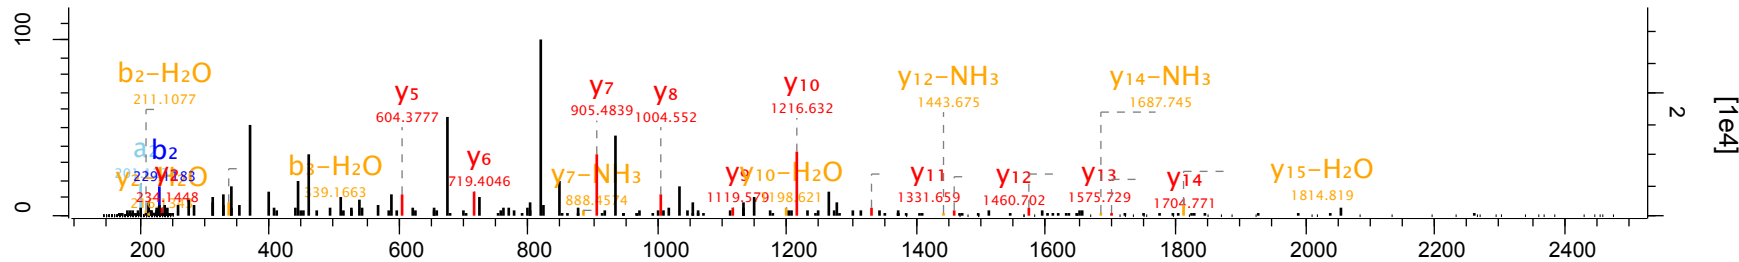

- E V Q E D E D P D V W D T R I S K -

b<sub>2</sub> |

y<sub>14</sub> y<sub>13</sub> y<sub>12</sub> y<sub>11</sub> y<sub>10</sub> y<sub>9</sub> y<sub>8</sub> y<sub>7</sub> y<sub>6</sub> y<sub>5</sub> y<sub>2</sub>

Raw file

20150306\_yeast3\_Top\_opt\_2ug\_C3\_01\_1665

Scan

33989

Method

TOF; CID

Score

119.41

m/z

838.71

Gene names

ATG18

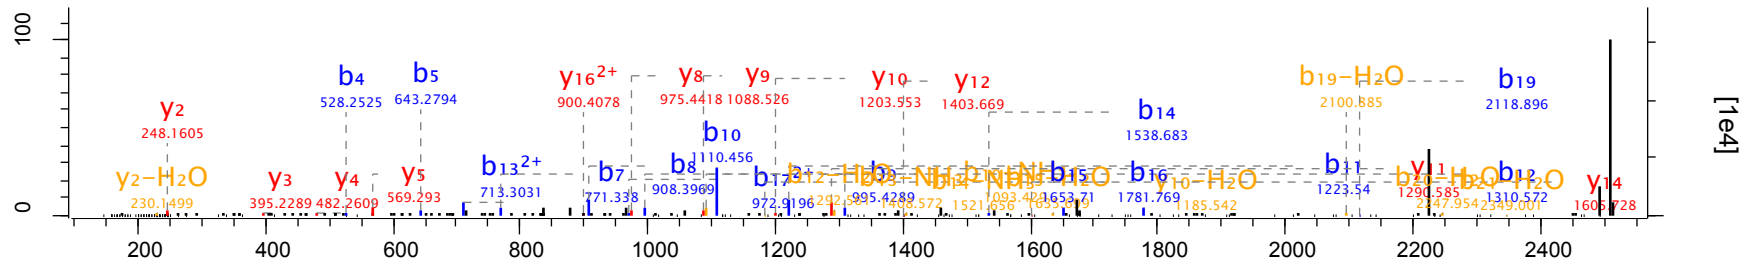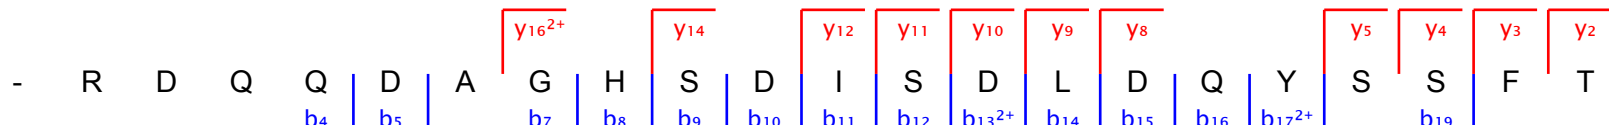

Raw file

Scan

Method

Score

m/z

Gene names

20150306\_yeast3\_Top\_opt\_2ug\_C3\_01\_1665

37107

TOF; CID

88.95

577.62

RRN10

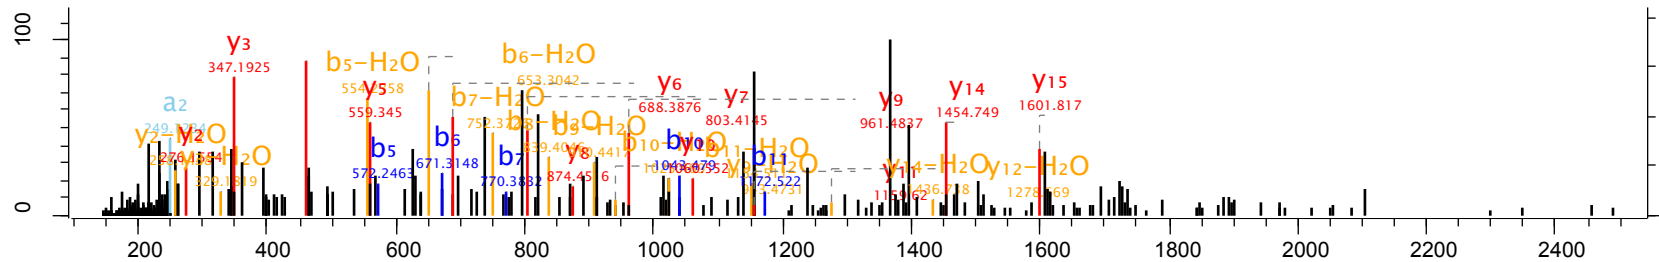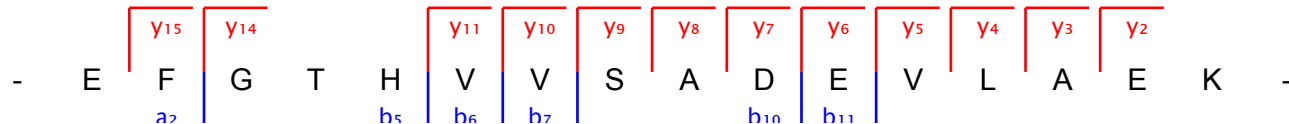

Raw file

20150306\_yeast3\_Top\_opt\_2ug\_C3\_01\_1665

Scan

38349

Method

TOF; CID

Score

46.25

m/z

686.36

Gene names

CWC23

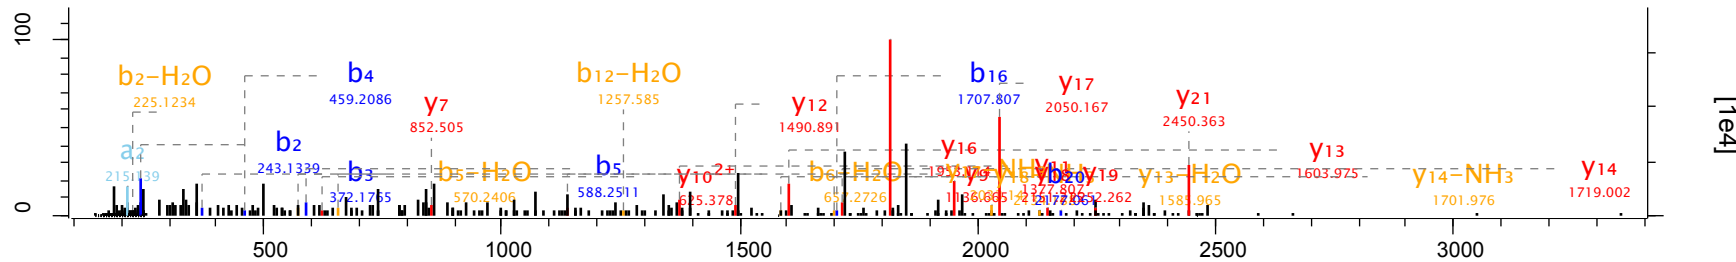

[1e4]

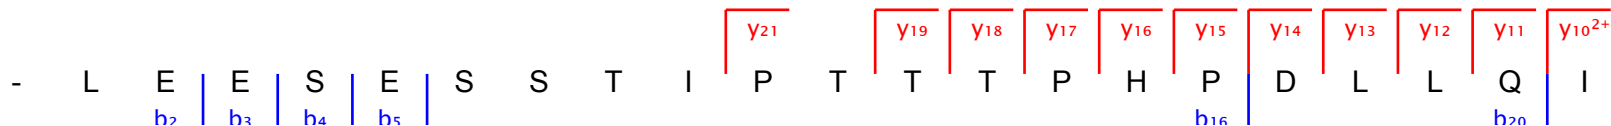

Raw file

Scan

Method

Score

m/z

Gene names

20150306\_yeast3\_Top\_opt\_2ug\_C3\_01\_1665

38545

TOF; CID

62.46

408.23

SAF1

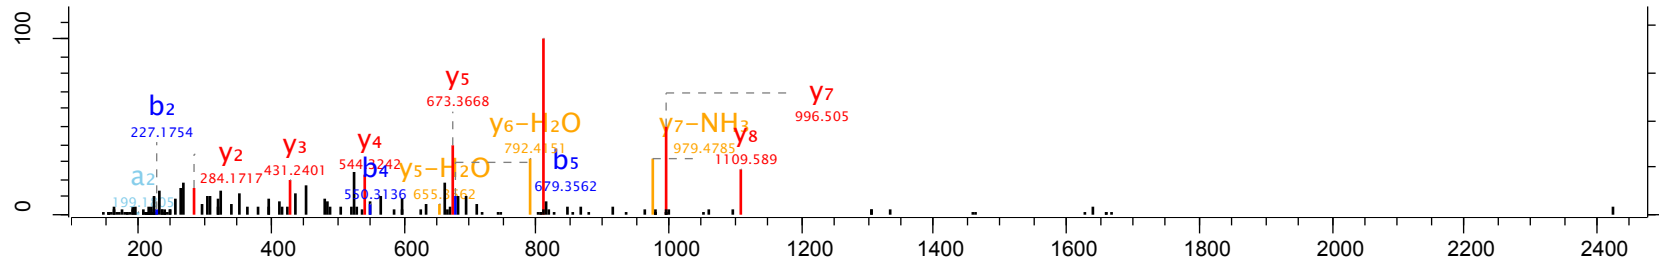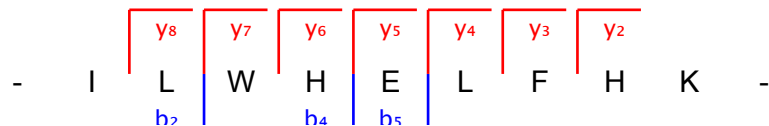

Raw file

Scan

Method

Score

m/z

Gene names

20150306\_yeast3\_Top\_opt\_2ug\_C3\_01\_1665

39180

TOF; CID

66.47

1071.99

SFL1

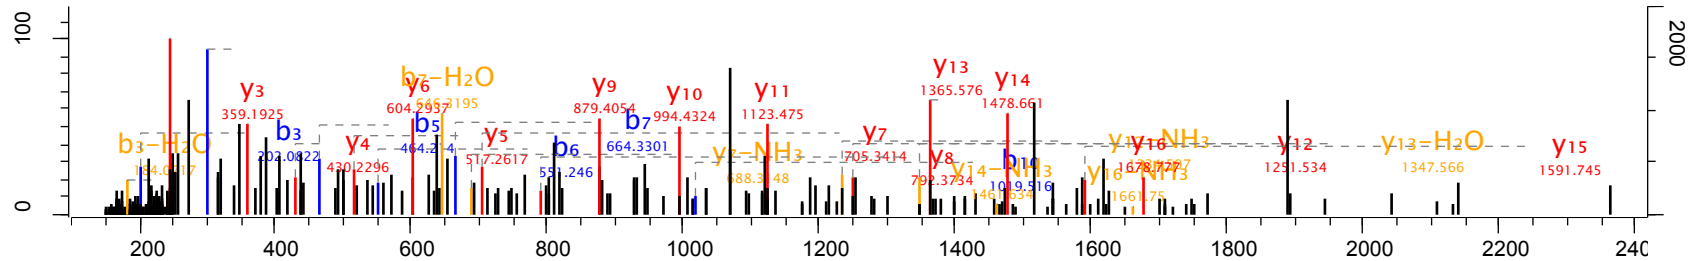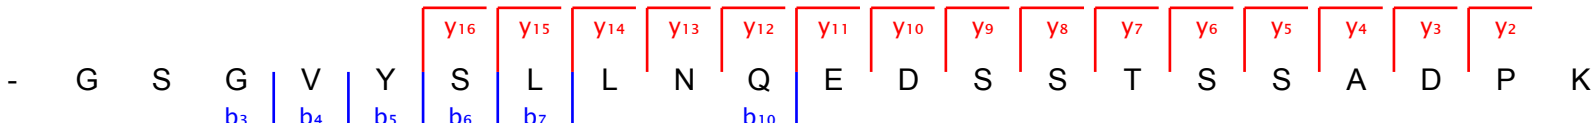

Raw file

Scan

Method

Score

m/z

Gene names

20150306\_yeast3\_Top\_opt\_2ug\_C3\_01\_1665

39303

TOF; CID

68.66

547.78

ACS1

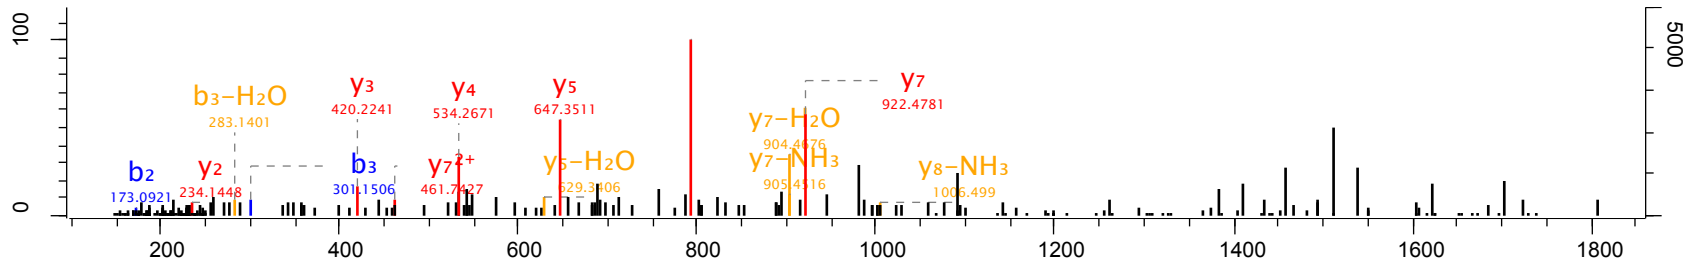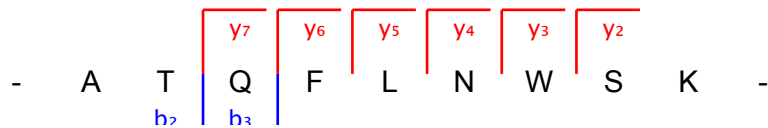



Raw file

Scan

Method

Score

m/z

Gene names

20150306\_yeast3\_Top\_opt\_2ug\_C3\_01\_1665

42474

TOF; CID

57.74

1021.82

PTC1

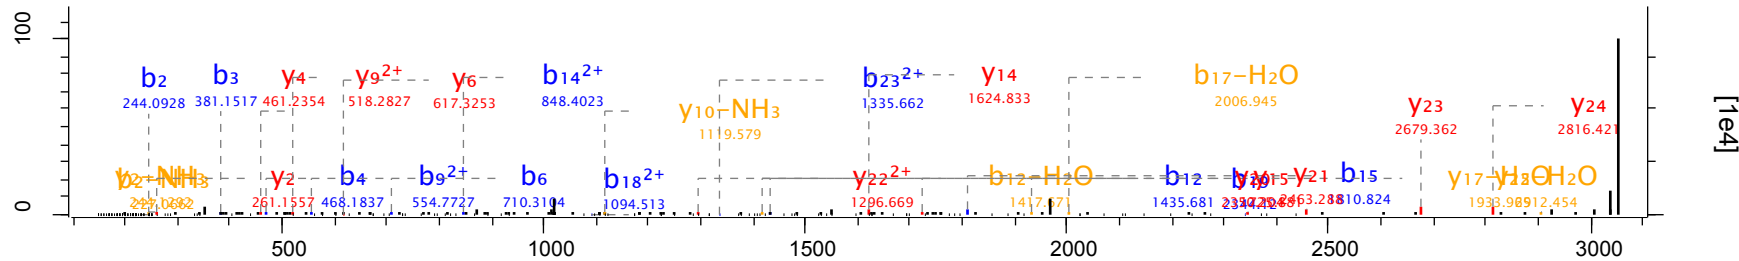

ac

- S N H S E I L E R P E T P Y D I T Y R V G

b<sub>2</sub> | b<sub>3</sub> | b<sub>4</sub> | b<sub>6</sub> | b<sub>9</sub><sup>2+</sup> | b<sub>14</sub><sup>2+</sup> | b<sub>15</sub> | b<sub>18</sub><sup>2+</sup> | b<sub>19</sub> |

y<sub>24</sub> | y<sub>23</sub> | y<sub>22</sub><sup>2+</sup> | y<sub>21</sub> | y<sub>20</sub> | y<sub>15</sub> | y<sub>14</sub> | y<sub>9</sub><sup>2+</sup> | y<sub>6</sub>

Raw file

Scan

Method

Score

m/z

Gene names

20150306\_yeast3\_Top\_opt\_2ug\_C3\_01\_1665

44197

TOF; CID

67.14

759.88

MET31

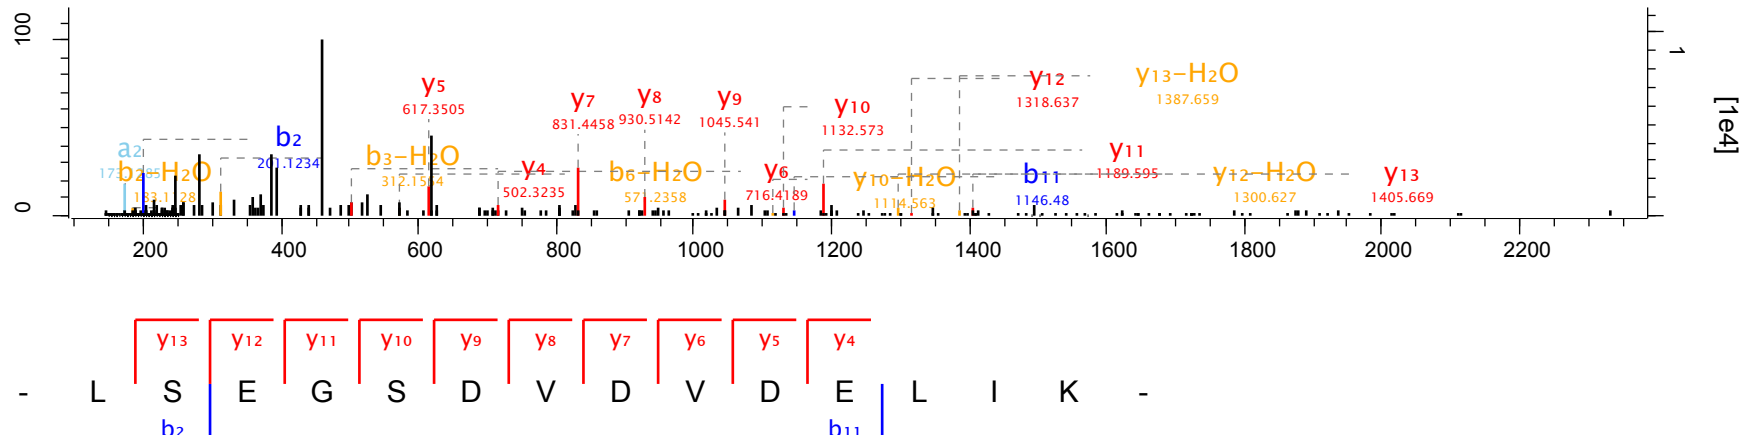

Raw file

Scan

Method

Score

m/z

Gene names

20150306\_yeast3\_Top\_opt\_2ug\_C3\_01\_1665

44935

TOF; CID

55.53

841.41

QRI7

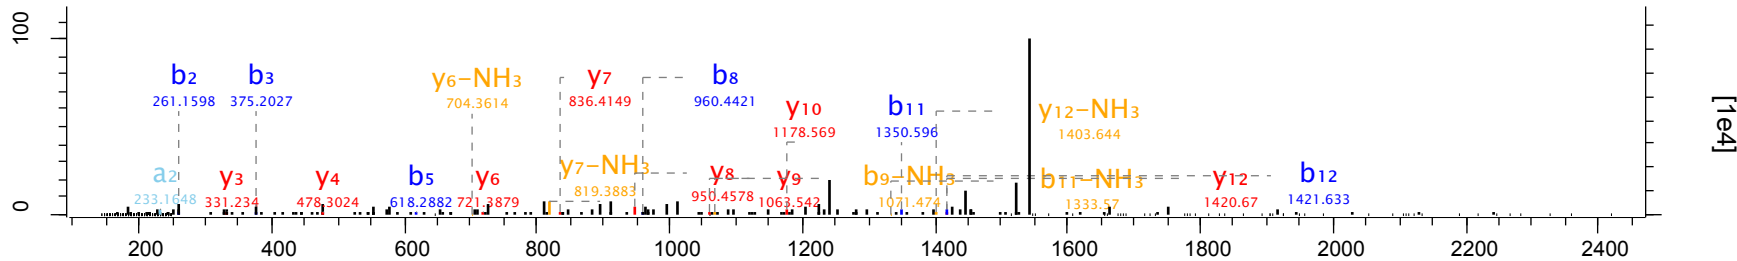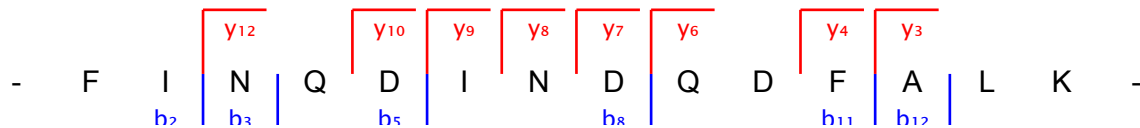

Raw file

Scan

Method

Score

m/z

Gene names

20150306\_yeast3\_Top\_opt\_2ug\_C3\_01\_1665

45866

TOF; CID

45.28

498.9

IGD1

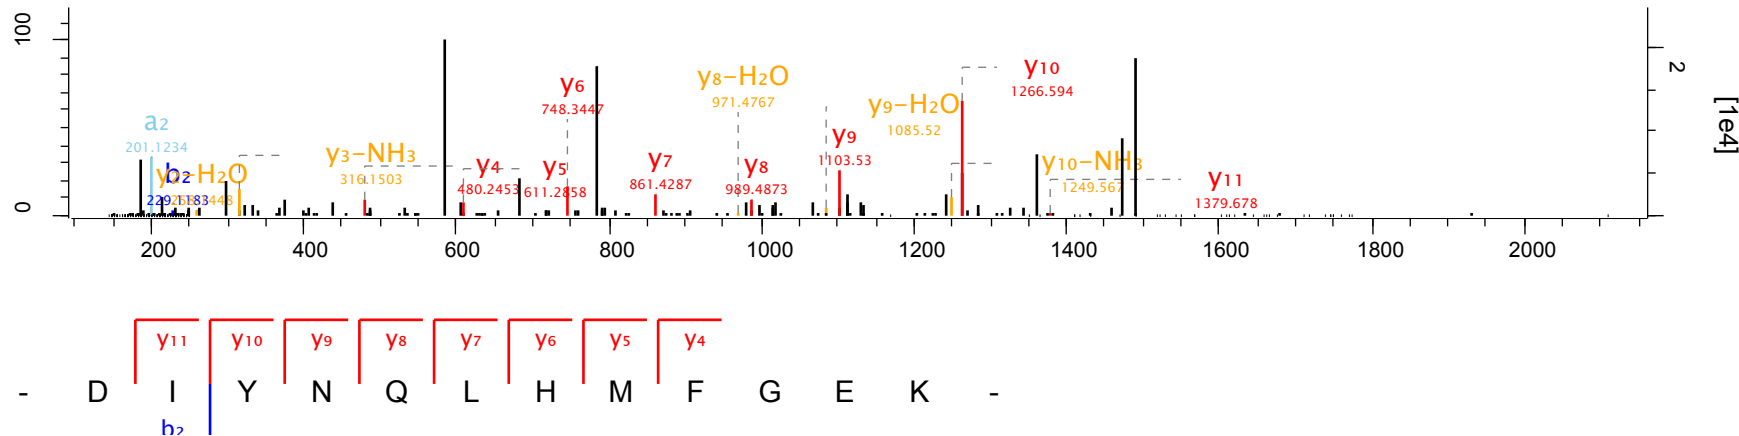

Raw file

Scan

Method

Score

m/z

Gene names

20150306\_yeast3\_Top\_opt\_2ug\_C3\_01\_1665

47280

TOF; CID

44.34

717.37

COX16

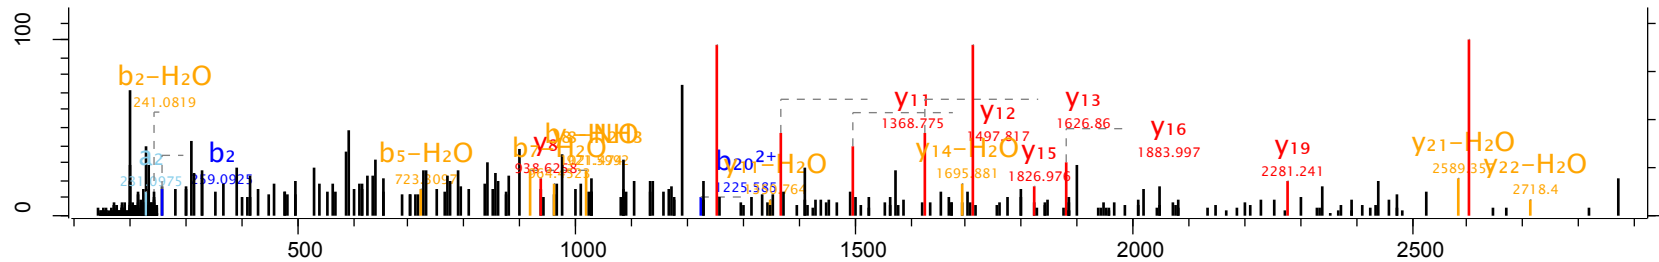

- E E Y Y R L Q G L S E E D W E P V R V A R

b<sub>2</sub> y<sub>21</sub> y<sub>19</sub> y<sub>16</sub> y<sub>15</sub> y<sub>14</sub> y<sub>13</sub> y<sub>12</sub> y<sub>11</sub> y<sub>10</sub> y<sub>8</sub>

b<sub>20</sub><sup>2+</sup>

Raw file

Scan

Method

Score

m/z

Gene names

20150306\_yeast3\_Top\_opt\_2ug\_C3\_01\_1665

47513

TOF; CID

103.97

553.94

ATG21

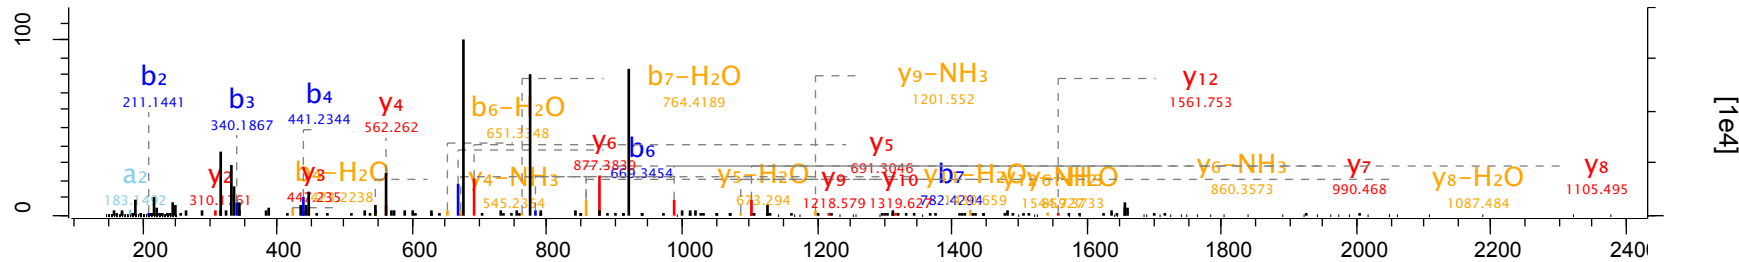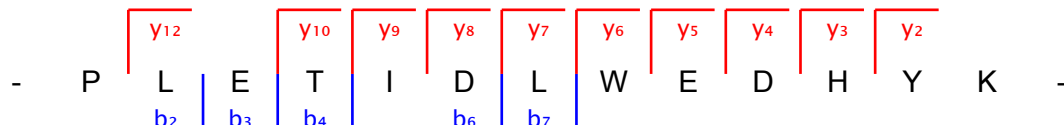

Raw file

Scan

Method

Score

m/z

Gene names

20150306\_yeast3\_Top\_opt\_2ug\_C3\_01\_1665

47568

TOF; CID

89.31

808.39

TMA10

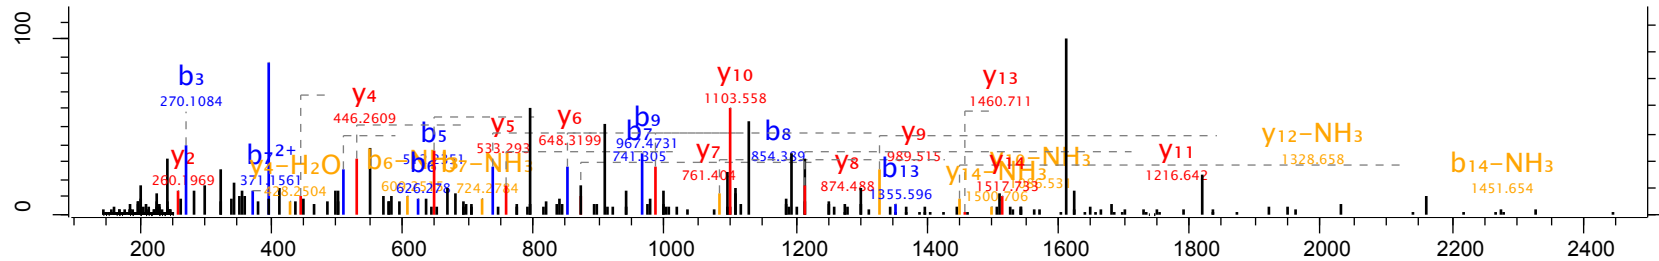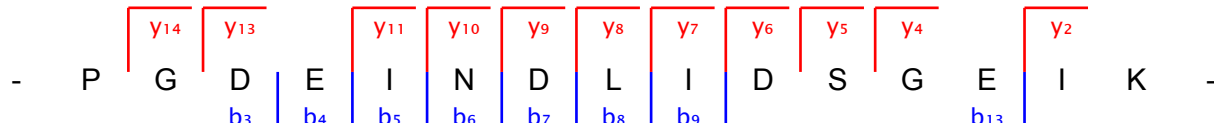

Raw file

Scan

Method

Score

m/z

Gene names

20150306\_yeast3\_Top\_opt\_2ug\_C3\_01\_1665

49471

TOF; CID

123.32

1147.6

TPO2

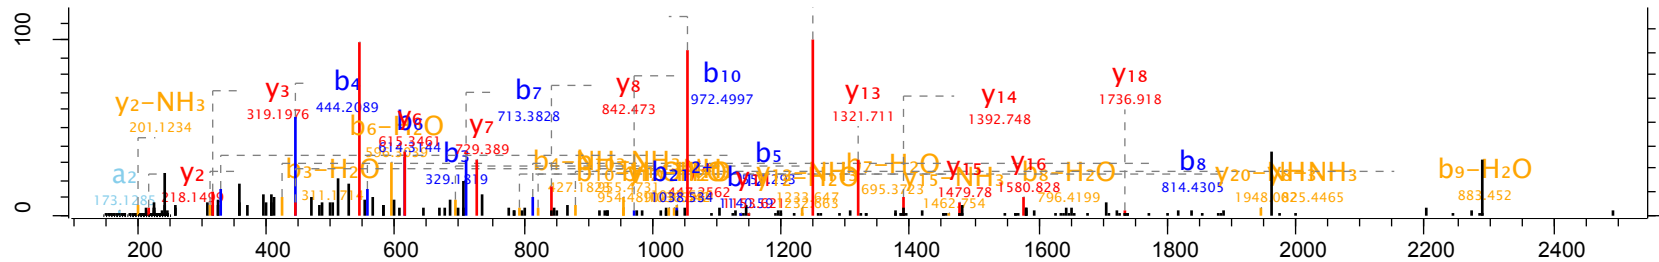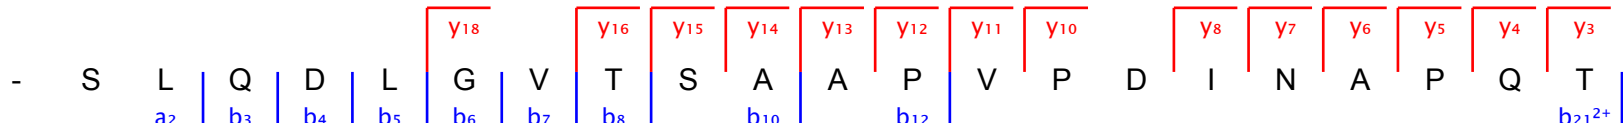



Raw file

Scan

Method

Score

m/z

Gene names

20150306\_yeast3\_Top\_opt\_2ug\_C3\_01\_1665

53596

TOF; CID

50.39

891.45

AVO2

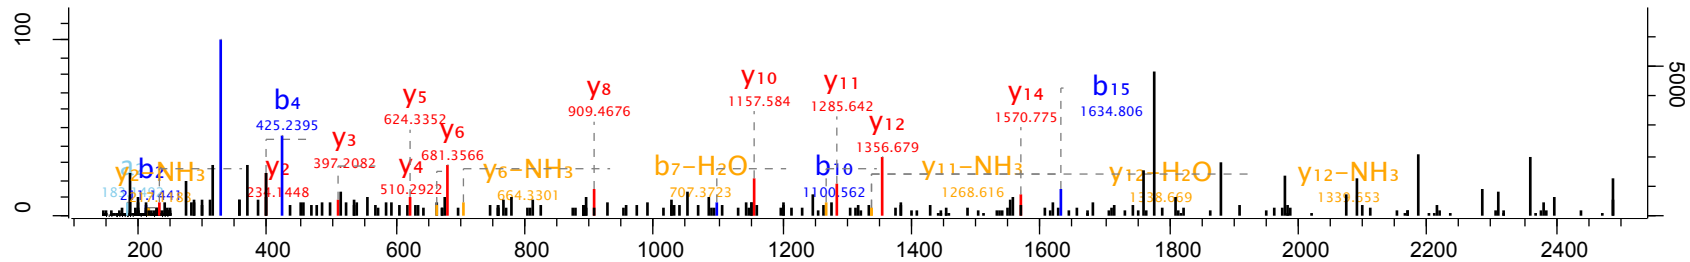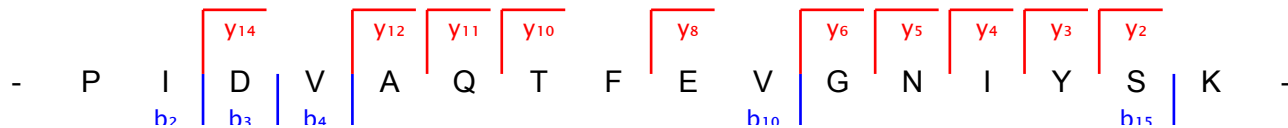

Raw file

Scan

Method

Score

m/z

Gene names

20150306\_yeast3\_Top\_opt\_2ug\_C3\_01\_1665

53738

TOF; CID

48.8

1207.54

BXI1

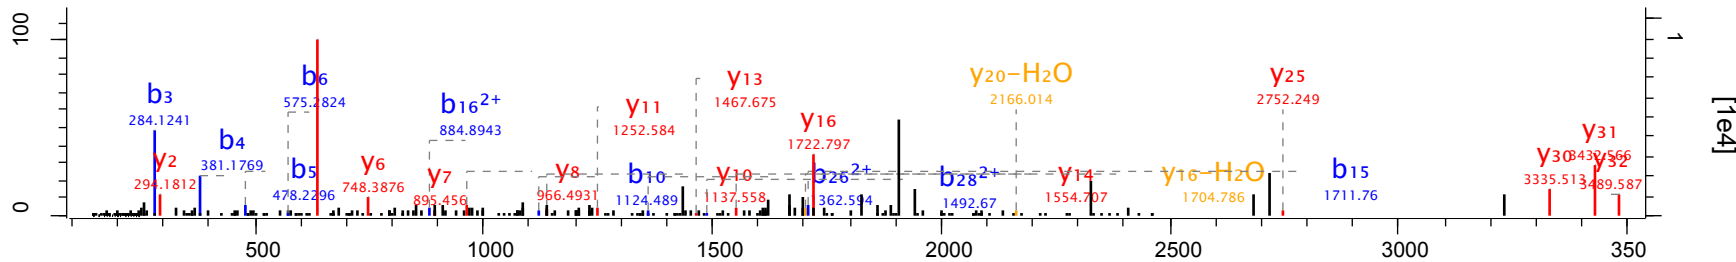

ac

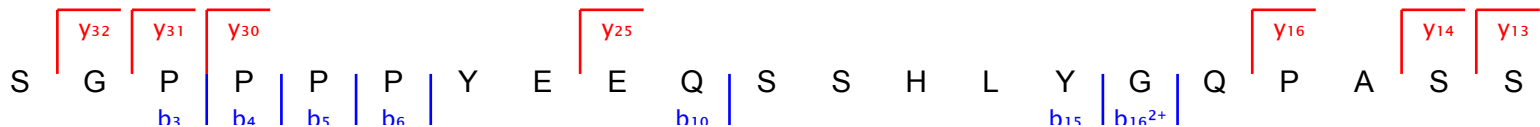

Raw file

Scan

Method

Score

m/z

Gene names

20150306\_yeast3\_Top\_opt\_2ug\_C3\_01\_1665

53956

TOF; CID

57.21

1048.82

PCL10

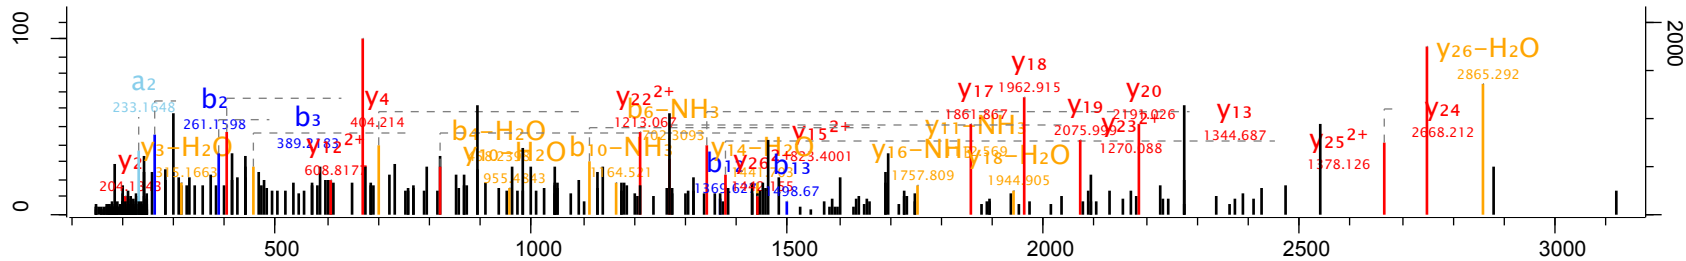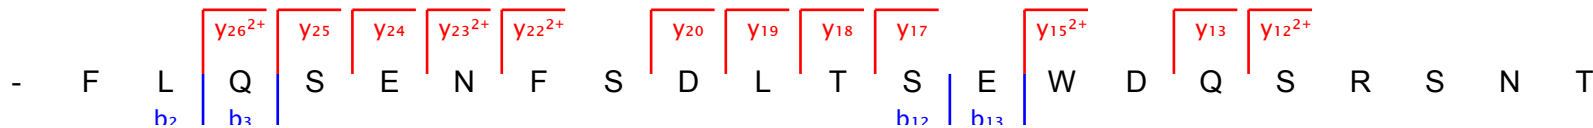

Raw file

Scan

Method

Score

m/z

Gene names

20150306\_yeast3\_Top\_opt\_2ug\_C3\_01\_1665

54169

TOF; CID

61.34

562.87

FMS1

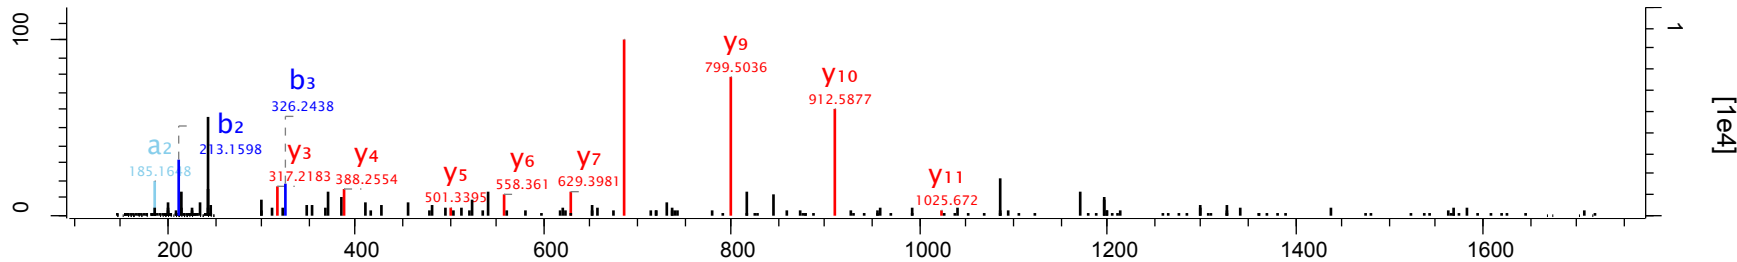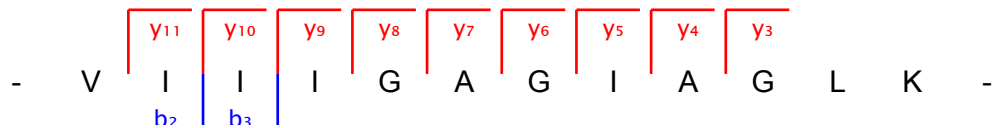

Raw file

20150306\_yeast3\_Top\_opt\_2ug\_C3\_01\_1665

Scan

54334

Method

TOF; CID

Score

48.24

m/z

831.09

Gene names

YAH1

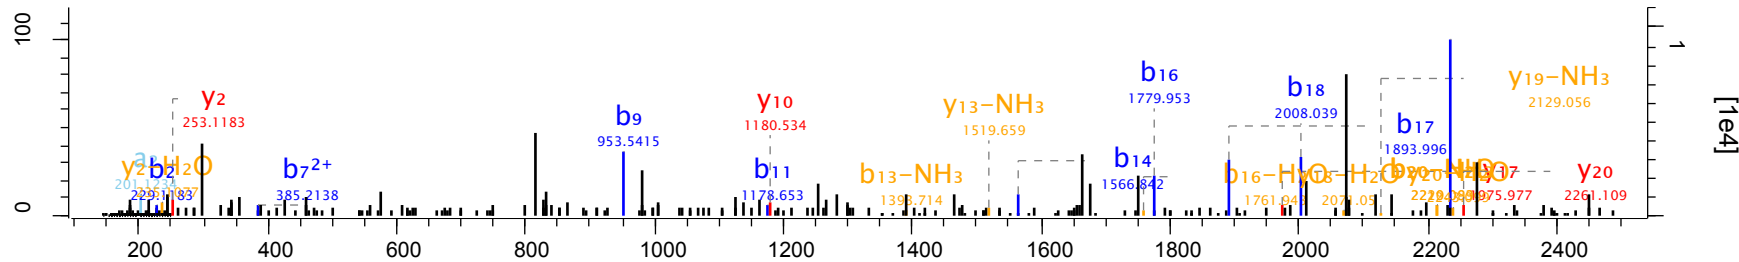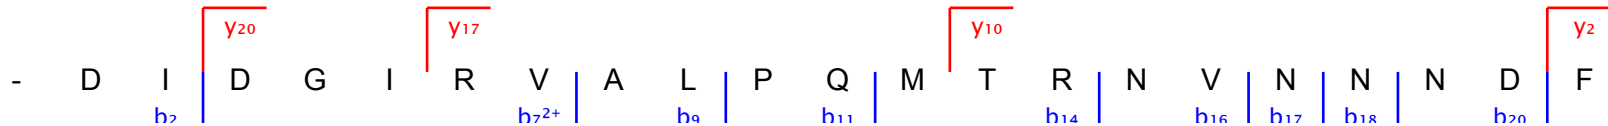

Raw file

Scan

Method

Score

m/z

Gene names

20150306\_yeast3\_Top\_opt\_2ug\_C3\_01\_1665

55357

TOF; CID

101.82

599.33

MRPL49

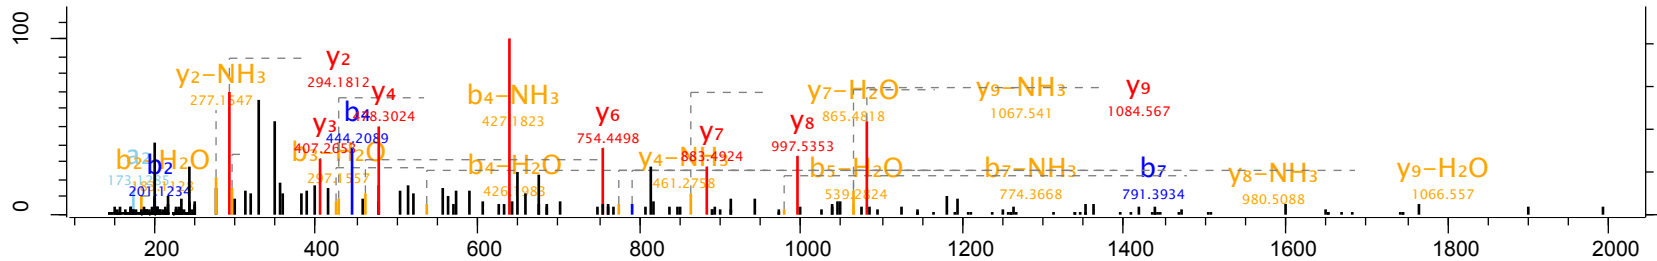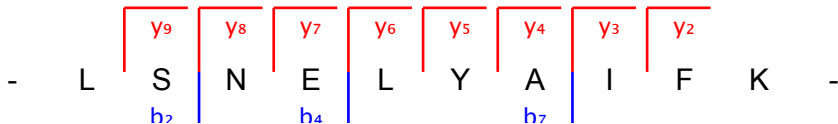

Raw file

Scan

Method

Score

m/z

Gene names

20150306\_yeast3\_Top\_opt\_2ug\_C3\_01\_1665

56708

TOF; CID

41.91

684.03

AIM43

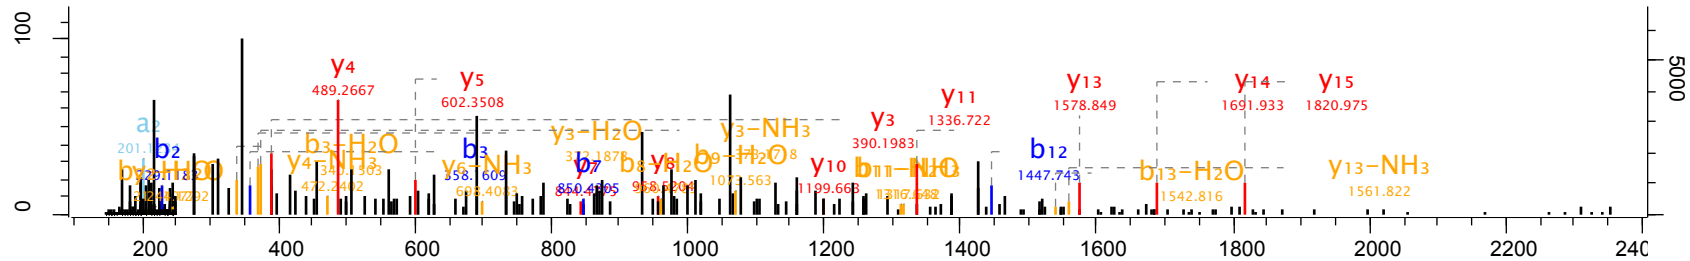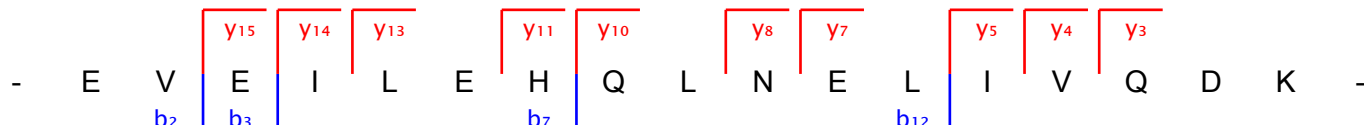

Raw file

Scan

Method

Score

m/z

Gene names

20150306\_yeast3\_Top\_opt\_2ug\_C3\_01\_1665

57313

TOF; CID

39.21

853.43

YPC1

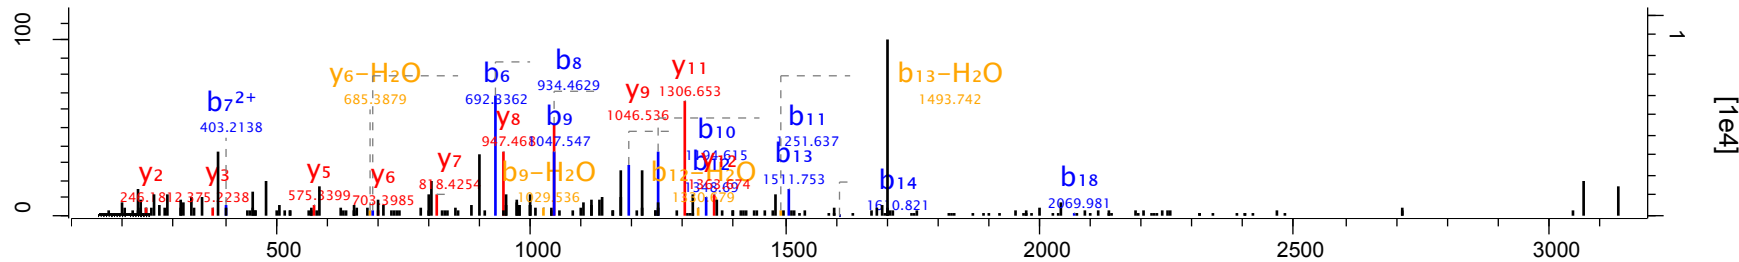

- P S T R Y S L E L F G P Y V E D Q S I E V

h<sub>6</sub> | h<sub>7<sup>2+</sup></sub> | h<sub>8</sub> | h<sub>9</sub> | h<sub>10</sub> | h<sub>11</sub> | h<sub>12</sub> | h<sub>13</sub> | h<sub>14</sub> | h<sub>18</sub>

y<sub>12</sub> | y<sub>11</sub> | y<sub>9</sub> | y<sub>8</sub> | y<sub>7</sub> | y<sub>6</sub> | y<sub>5</sub> | y<sub>3</sub> | y<sub>2</sub>



Raw file

Scan

Method

Score

m/z

Gene names

20150306\_yeast3\_Top\_opt\_2ug\_C3\_01\_1665

57429

TOF; CID

32.5

912.43

DSS4

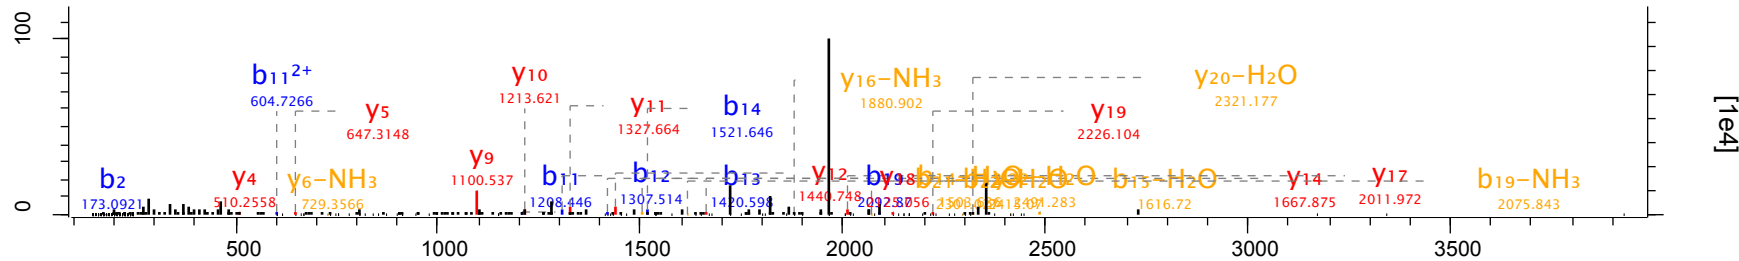

- A T C S F E G C H S A V I T I N D D N I I

b<sub>2</sub> | b<sub>11</sub> | b<sub>12</sub> | b<sub>13</sub> | b<sub>14</sub> | b<sub>19</sub>

y<sub>19</sub> | y<sub>18</sub> | y<sub>17</sub> | y<sub>14</sub> | y<sub>12</sub>

Raw file

Scan

Method

Score

m/z

Gene names

20150306\_yeast3\_Top\_opt\_2ug\_C3\_01\_1665

57733

TOF; CID

44.54

798.41

PSF3

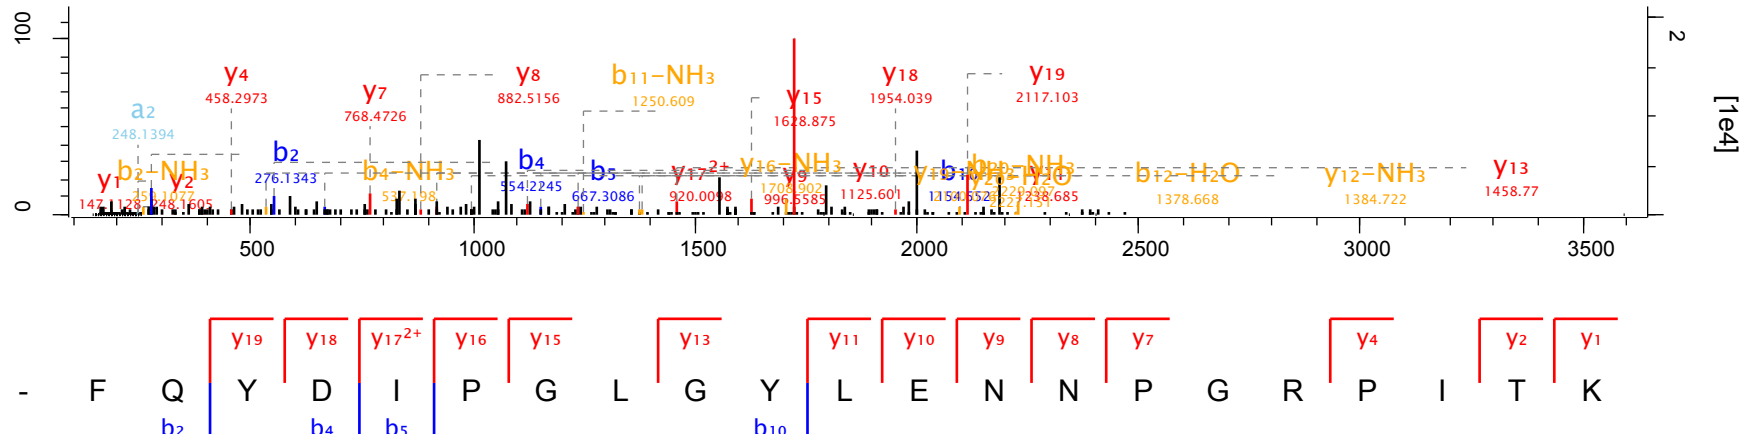

Raw file

Scan

Method

Score

m/z

Gene names

20150306\_yeast3\_Top\_opt\_2ug\_C3\_01\_1665

61986

TOF; CID

97.49

1038.97

TOM6

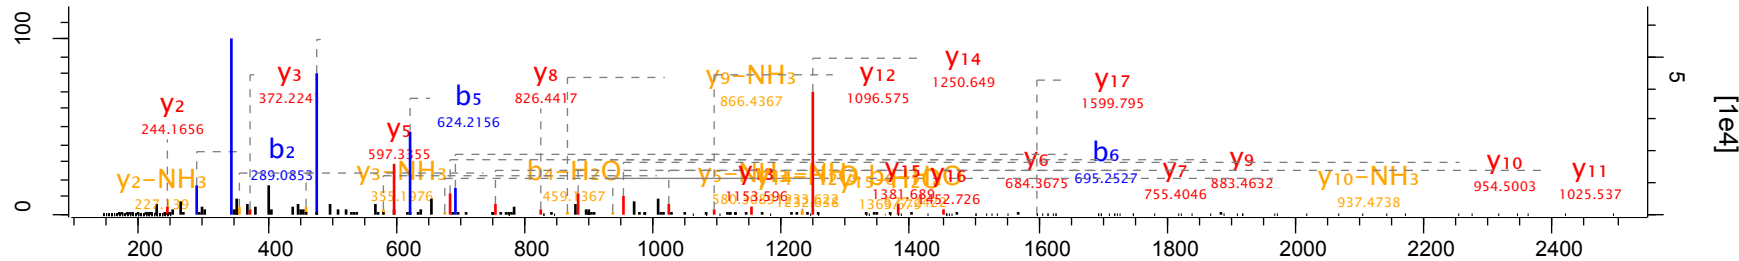

ac

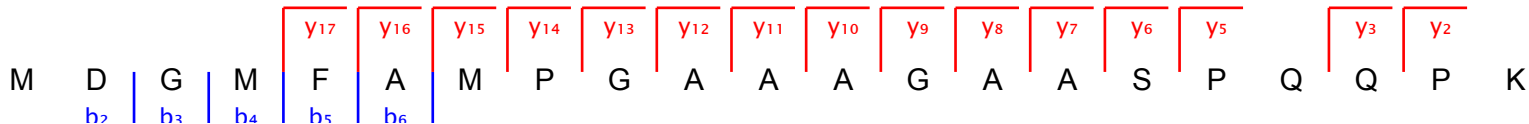

Raw file

20150306\_yeast3\_Top\_opt\_2ug\_C3\_01\_1665

Scan

Method

Score

m/z

Gene names

64601

TOF; CID

38.26

899.45

PSF1

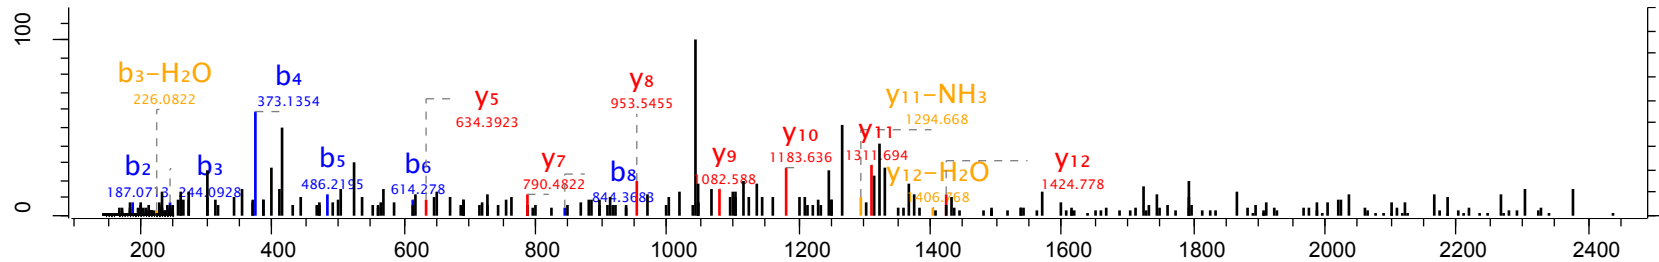

- D A G E I Q T E Y G V F N L I K -  
| | | | | | | | | | | | | | | | | | | |  
 $b_2$   $b_3$   $b_4$   $b_5$   $b_6$   $b_8$   $y_{12}$   $y_{11}$   $y_{10}$   $y_9$   $y_8$   $y_7$   $y_5$

Raw file

20150306\_yeast3\_Top\_opt\_2ug\_C3\_01\_1665

Scan

68046

Method

TOF; CID

Score

72.16

m/z

937.47

Gene names

YDC1

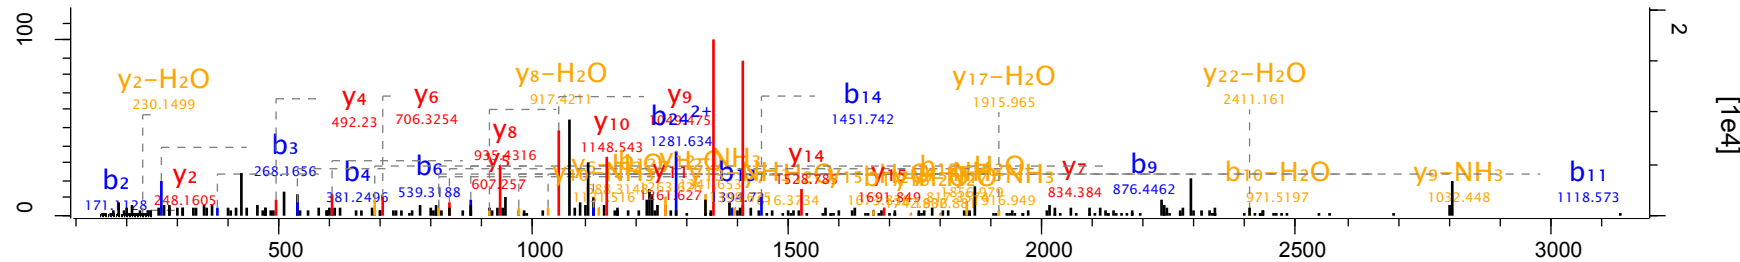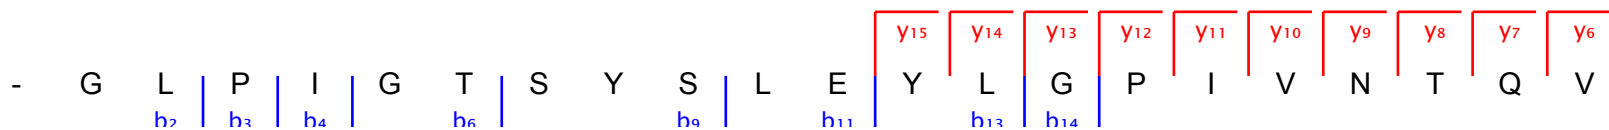

Raw file

Scan

Method

Score

m/z

Gene names

20150306\_yeast3\_Top\_opt\_2ug\_C3\_01\_1665

69992

TOF; CID

153.25

1014.55

SRP21

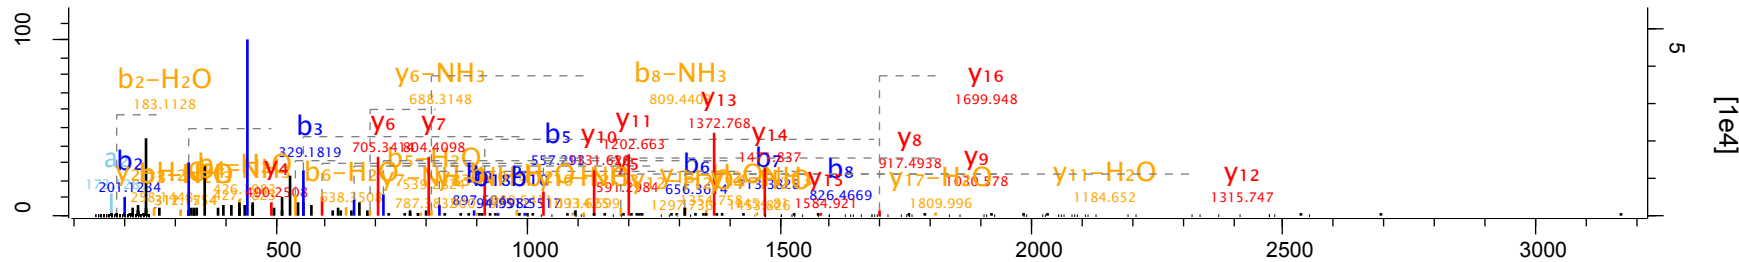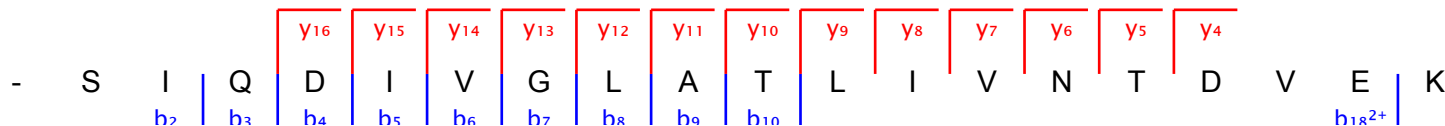

Raw file

20150306\_yeast3\_Top\_opt\_2ug\_C3\_01\_1667

Scan

5773

Method

TOF; CID

Score

189.15

m/z

981.45

Gene names

YMR295C

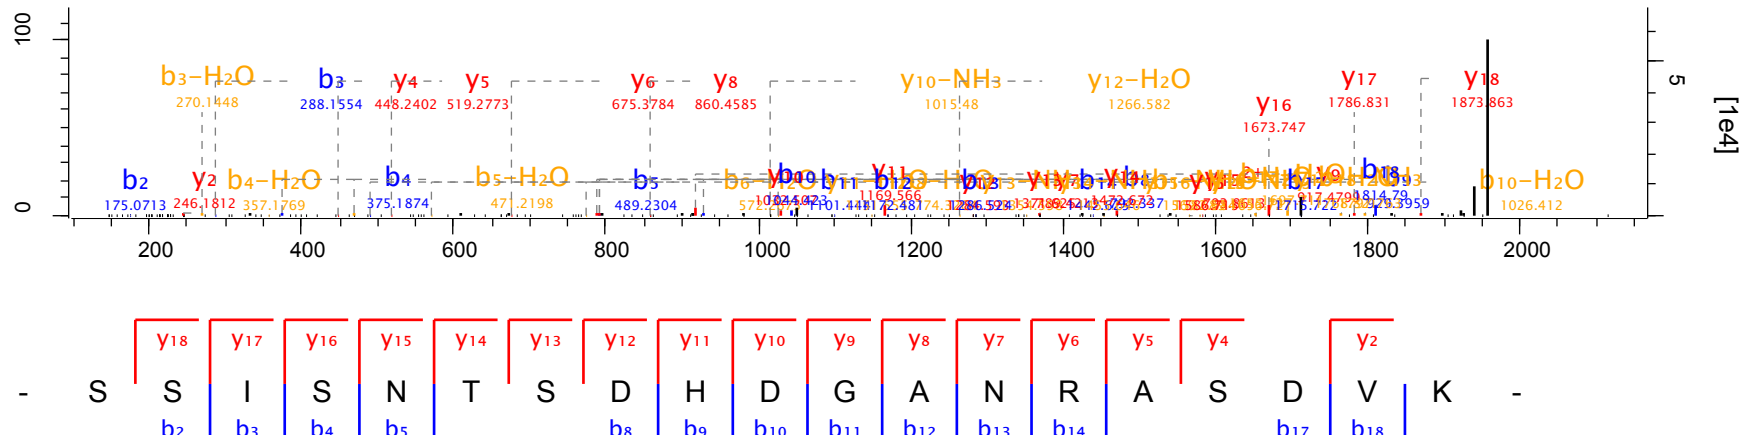

Raw file

Scan

Method

Score

m/z

20150306\_yeast3\_Top\_opt\_2ug\_C3\_01\_1667

8095

TOF; CID

45.22

918.38

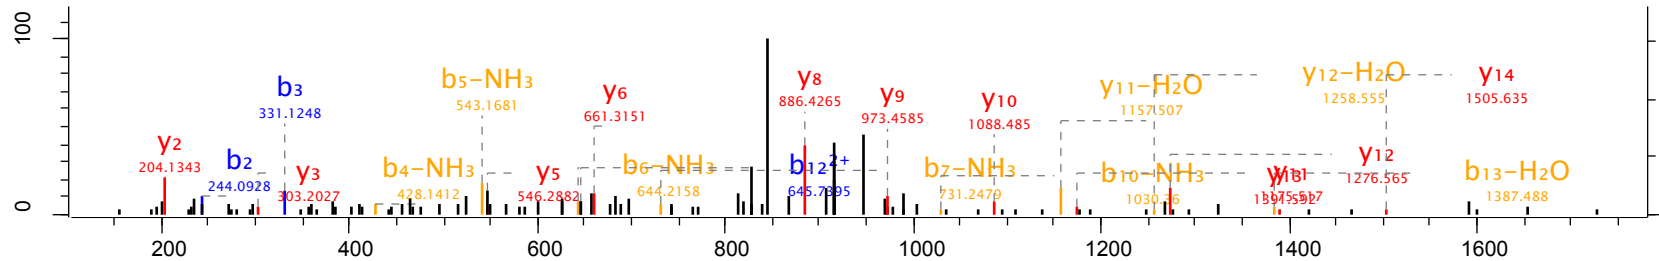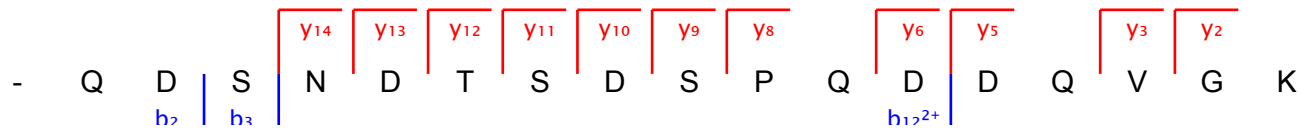



Raw file

Scan

Method

Score

m/z

Gene names

20150306\_yeast3\_Top\_opt\_2ug\_C3\_01\_1667

11644

TOF; CID

64.52

527.02

ZRG8

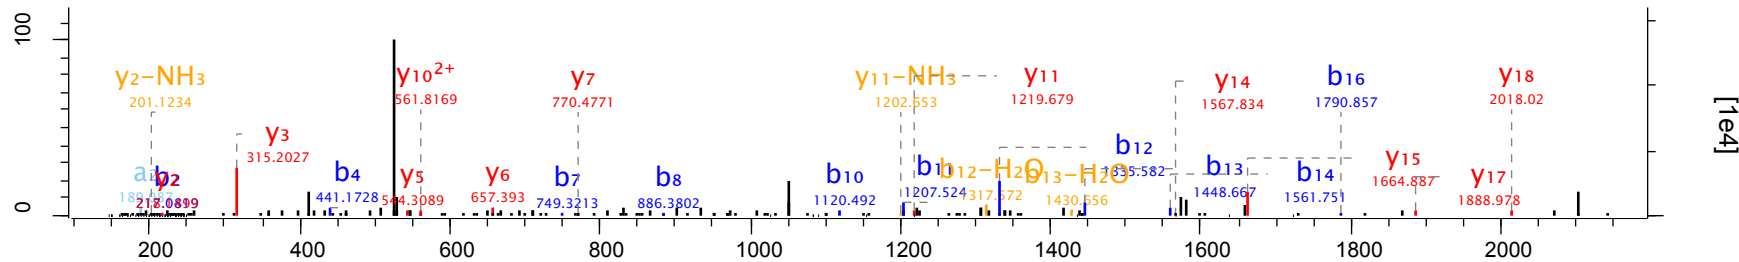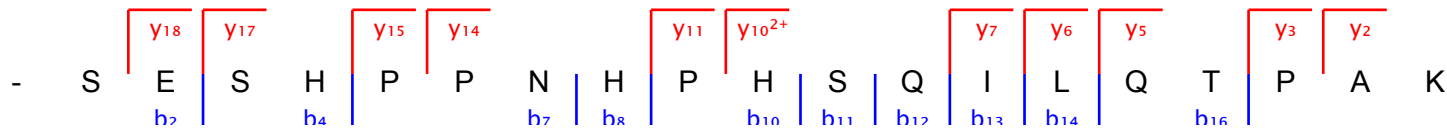

Raw file

Scan

Method

Score

m/z

Gene names

20150306\_yeast3\_Top\_opt\_2ug\_C3\_01\_1667

15796

TOF; CID

84.48

651.33

ACE2

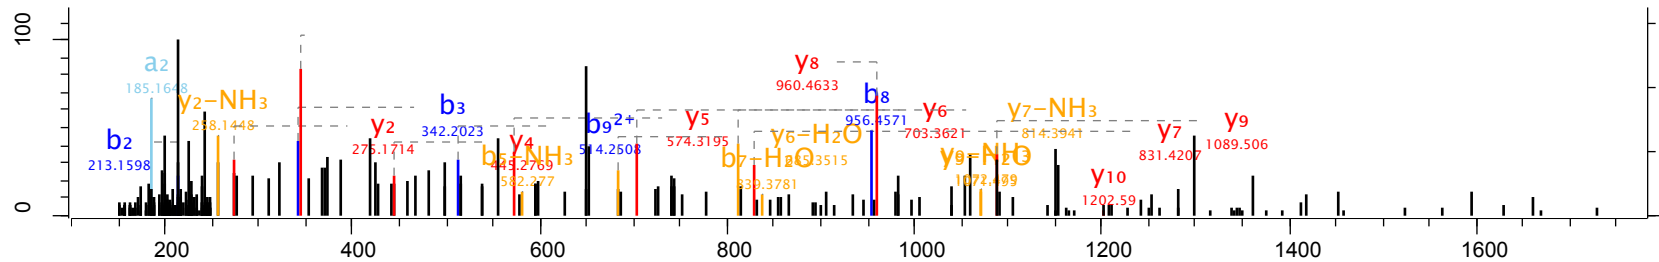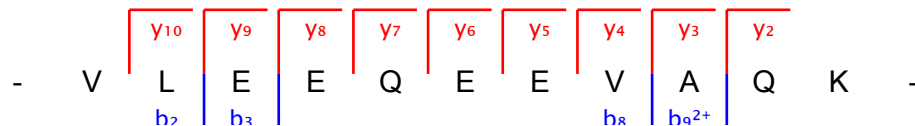

Raw file

Scan

Method

Score

m/z

Gene names

20150306\_yeast3\_Top\_opt\_2ug\_C3\_01\_1667

17010

TOF; CID

73.09

585.28

GLN3

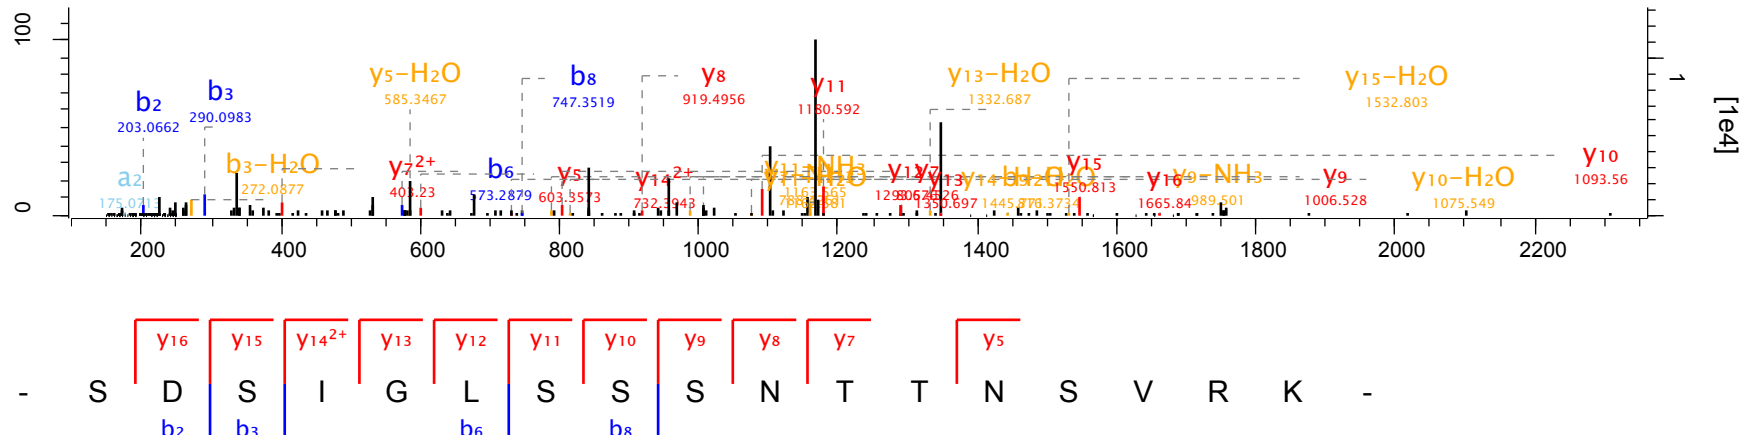

Raw file

Scan

Method

Score

m/z

Gene names

20150306\_yeast3\_Top\_opt\_2ug\_C3\_01\_1667

17185

TOF; CID

65.22

712.81

ATG16

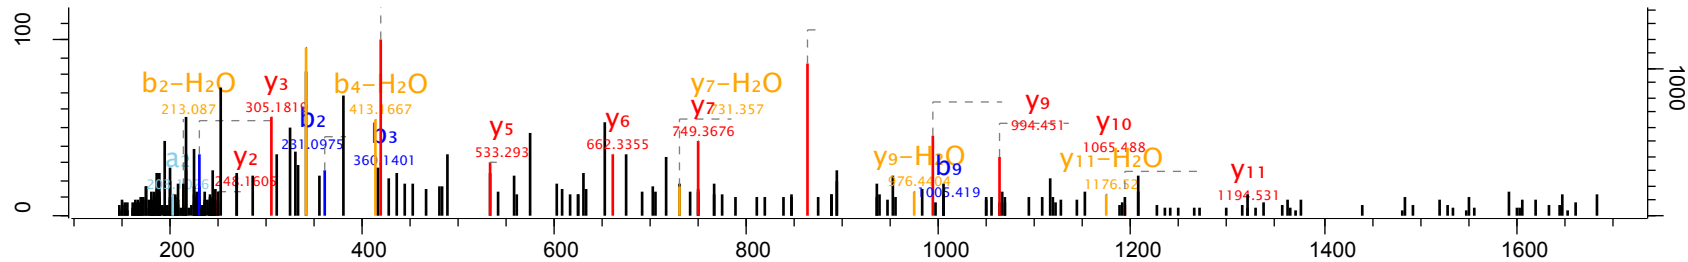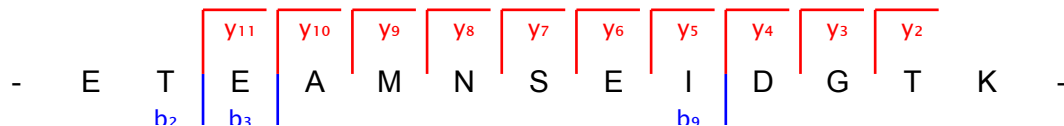

Raw file

Scan

Method

Score

m/z

Gene names

20150306\_yeast3\_Top\_opt\_2ug\_C3\_01\_1667

20339

TOF; CID

48.9

609.31

YGR042W

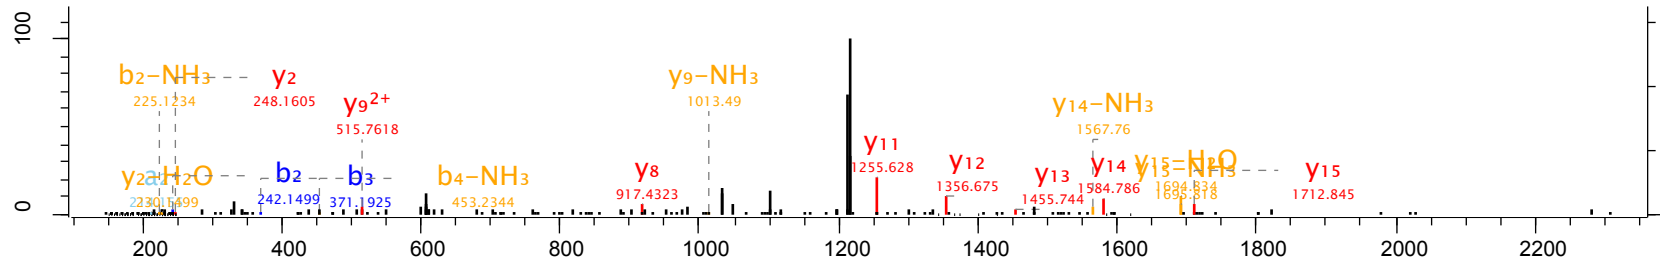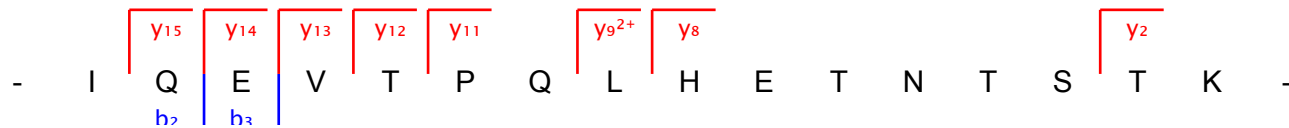

Raw file

Scan

Method

Score

m/z

Gene names

20150306\_yeast3\_Top\_opt\_2ug\_C3\_01\_1667

20910

TOF; CID

84.3

700.31

SFK1

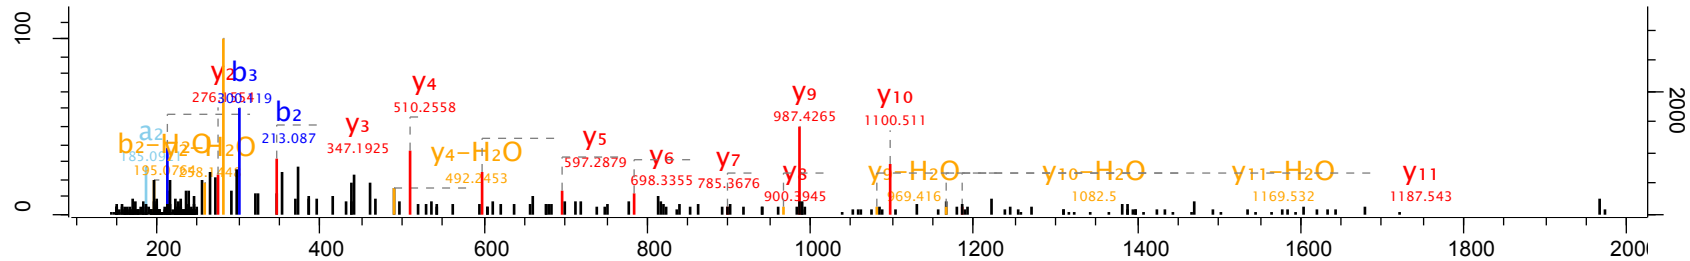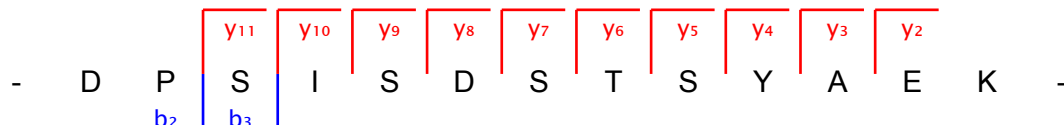

Raw file

Scan

Method

Score

m/z

Gene names

20150306\_yeast3\_Top\_opt\_2ug\_C3\_01\_1667

21653

TOF; CID

70.72

743.35

SPT10

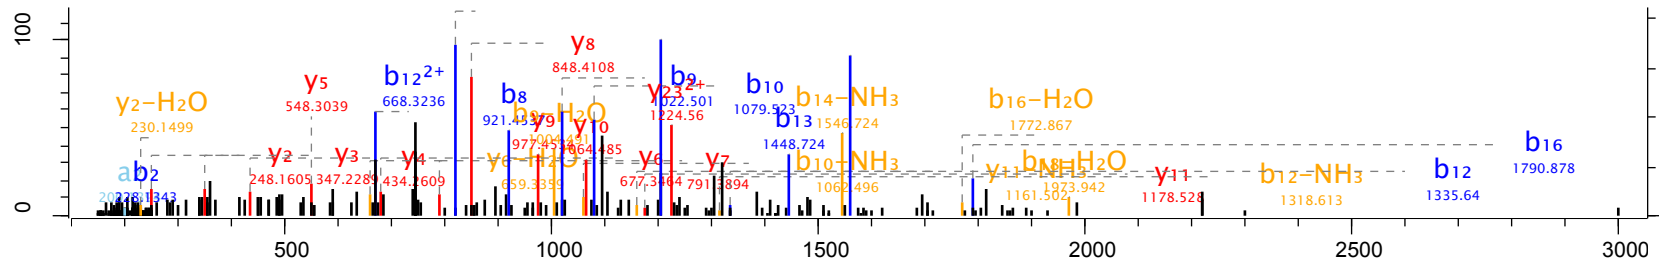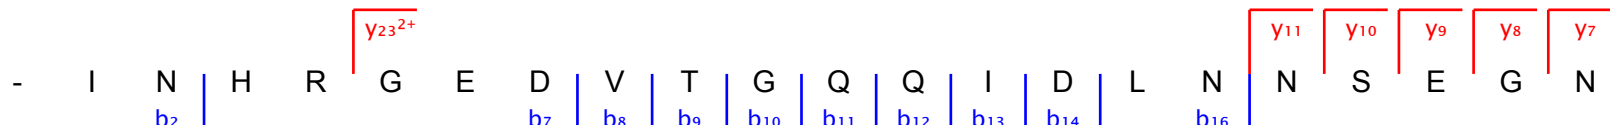

Raw file

Scan

Method

Score

m/z

Gene names

20150306\_yeast3\_Top\_opt\_2ug\_C3\_01\_1667

24746

TOF; CID

80.39

812.37

MMT2

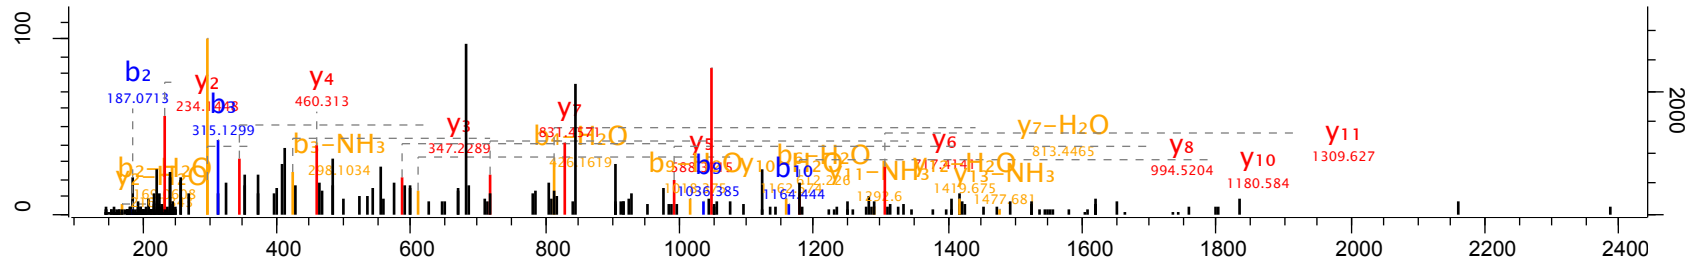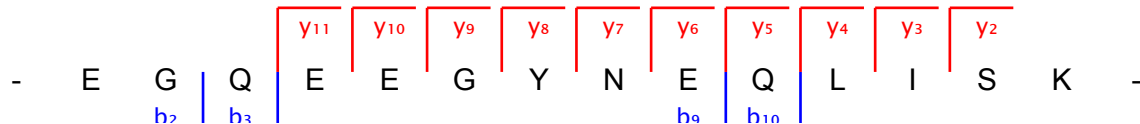



Raw file

Scan

Method

Score

m/z

Gene names

20150306\_yeast3\_Top\_opt\_2ug\_C3\_01\_1667

24864

TOF; CID

72.23

476.22

SDH4

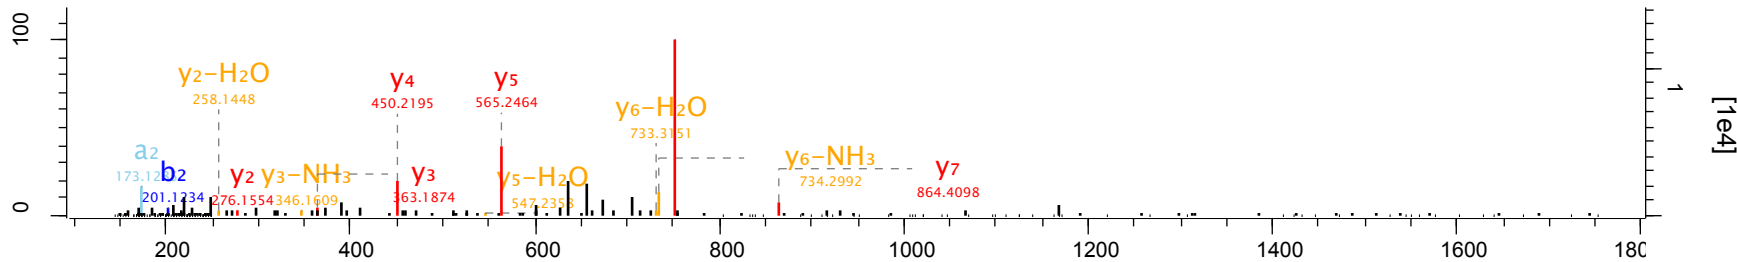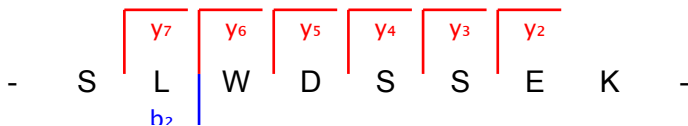

Raw file

Scan

Method

Score

m/z

Gene names

20150306\_yeast3\_Top\_opt\_2ug\_C3\_01\_1667

24936

TOF; CID

81.78

487.73

COX19

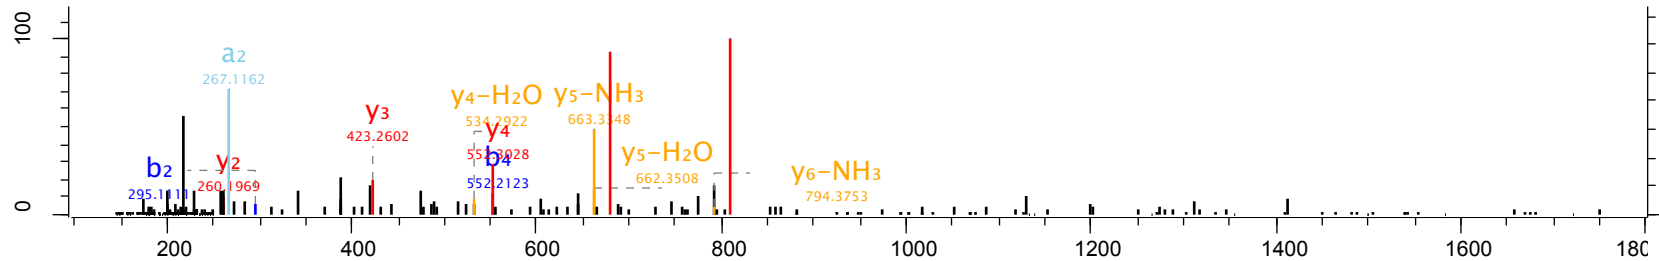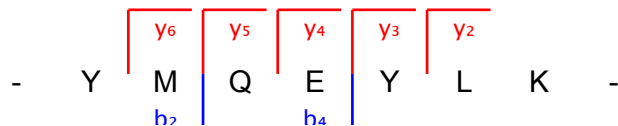

Raw file

Scan

Method

Score

m/z

Gene names

20150306\_yeast3\_Top\_opt\_2ug\_C3\_01\_1667

24939

TOF; CID

58.11

765.7

NSE5

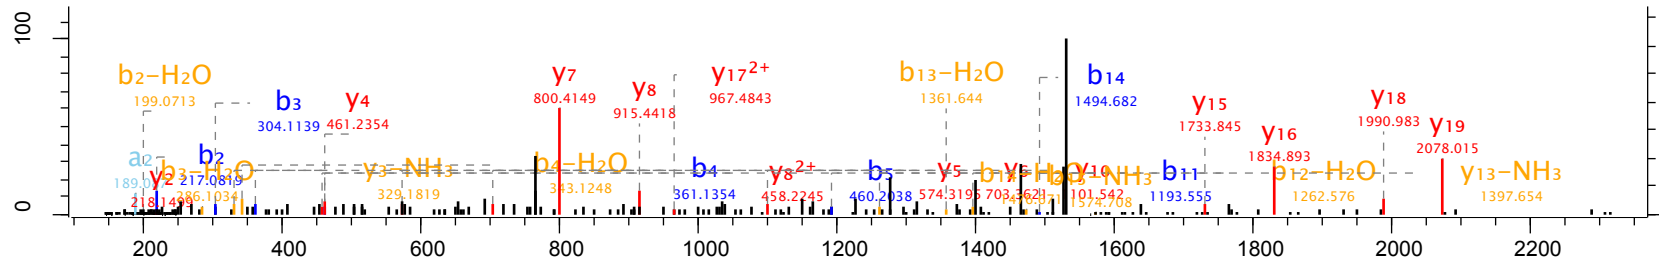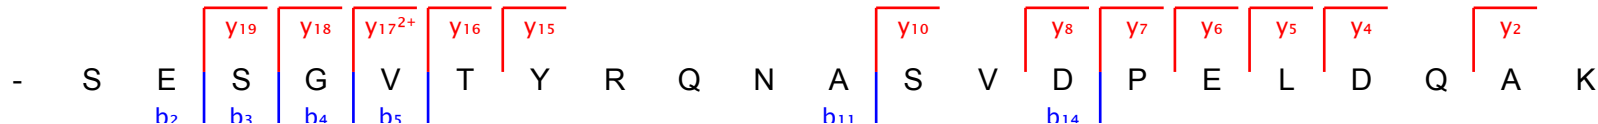

Raw file

Scan

Method

Score

m/z

Gene names

20150306\_yeast3\_Top\_opt\_2ug\_C3\_01\_1667

25324

TOF; CID

58.7

579.32

DAL3

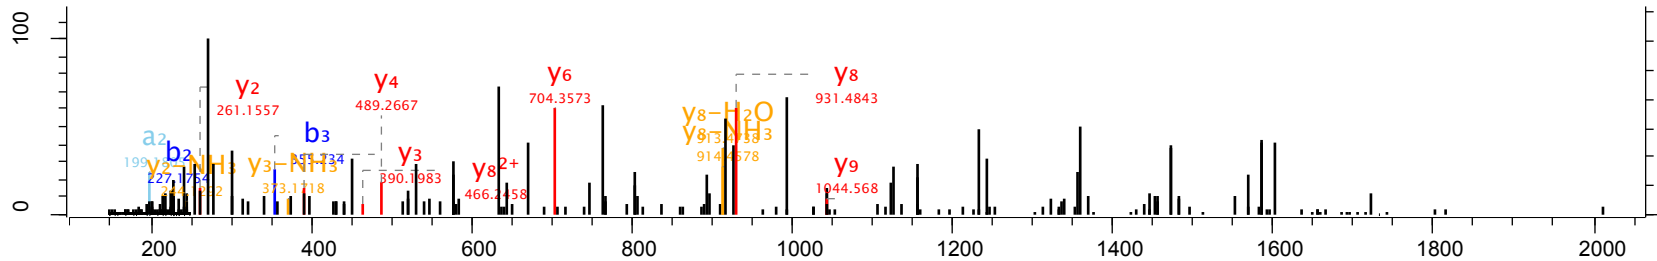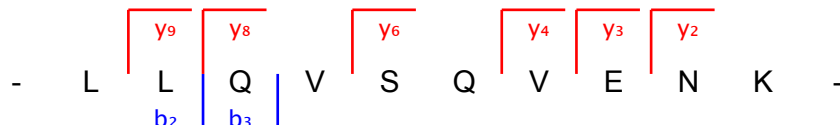

Raw file

Scan

Method

Score

m/z

Gene names

20150306\_yeast3\_Top\_opt\_2ug\_C3\_01\_1667

25913

TOF; CID

49.99

687.37

BAG7

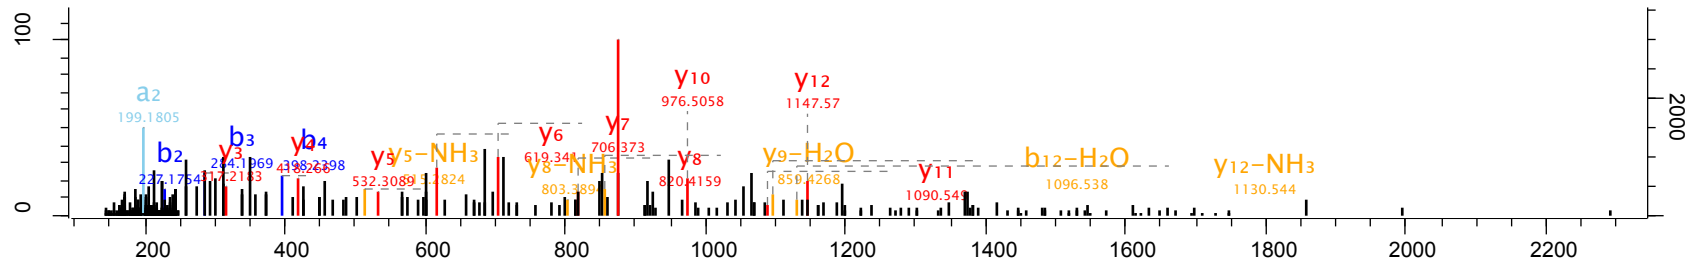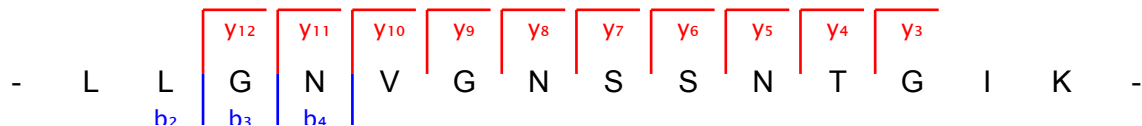

Raw file

20150306\_yeast3\_Top\_opt\_2ug\_C3\_01\_1667

Scan

29502

Method

TOF; CID

Score

67.02

m/z

714.39

Gene names

CDD1

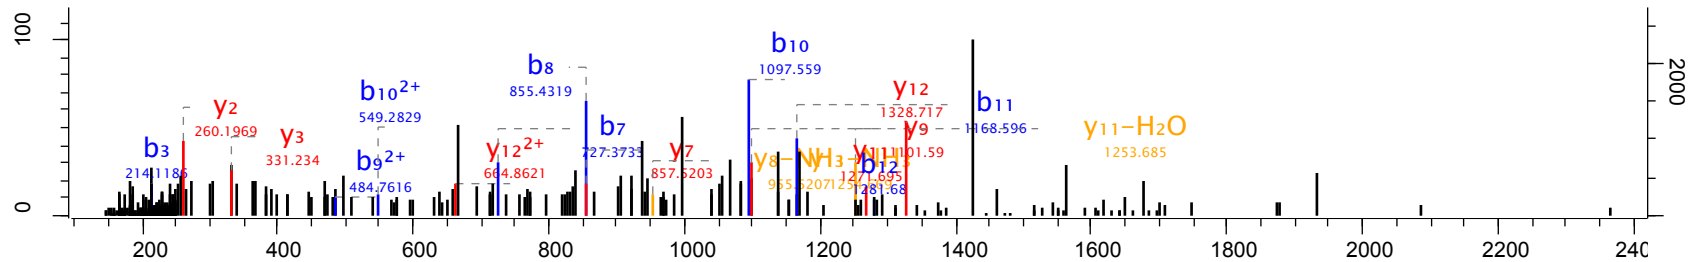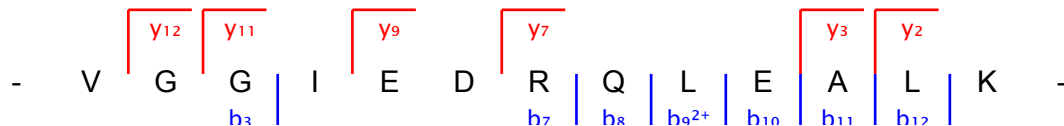

Raw file

Scan

Method

Score

m/z

Gene names

20150306\_yeast3\_Top\_opt\_2ug\_C3\_01\_1667

31422

TOF; CID

103.91

612.31

MRPS17

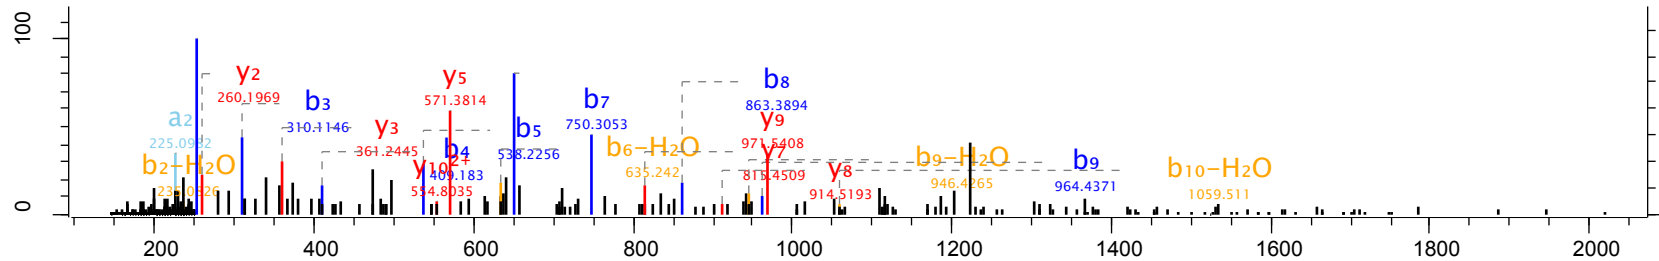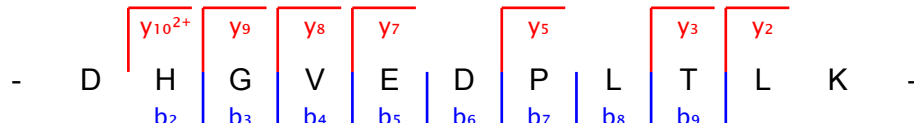

Raw file

Scan

Method

Score

m/z

Gene names

20150306\_yeast3\_Top\_opt\_2ug\_C3\_01\_1667

31528

TOF; CID

91.81

527.28

MST27;MST28

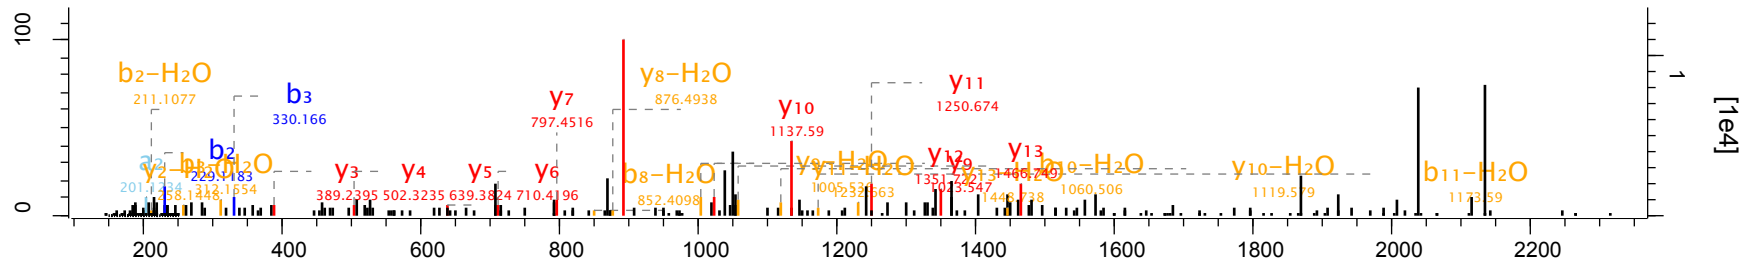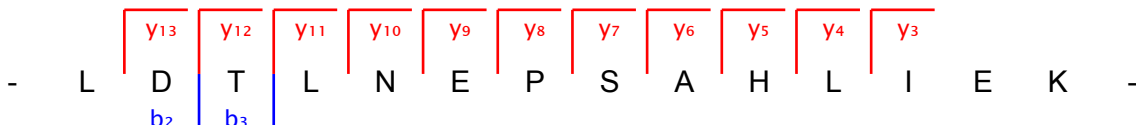



Raw file

Scan

Method

Score

m/z

Gene names

20150306\_yeast3\_Top\_opt\_2ug\_C3\_01\_1667

33688

TOF; CID

82.75

354.21

MRPL39

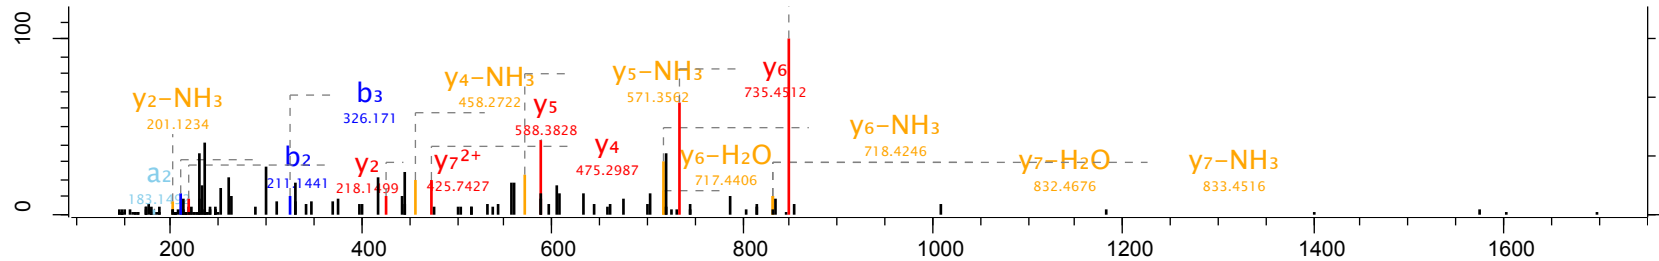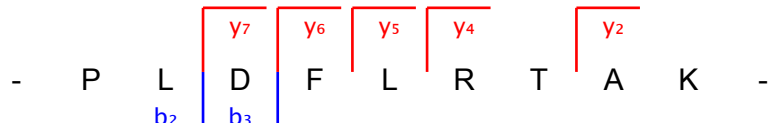

Raw file

Scan

Method

Score

m/z

Gene names

20150306\_yeast3\_Top\_opt\_2ug\_C3\_01\_1667

35236

TOF; CID

44.93

772.88

PTP1

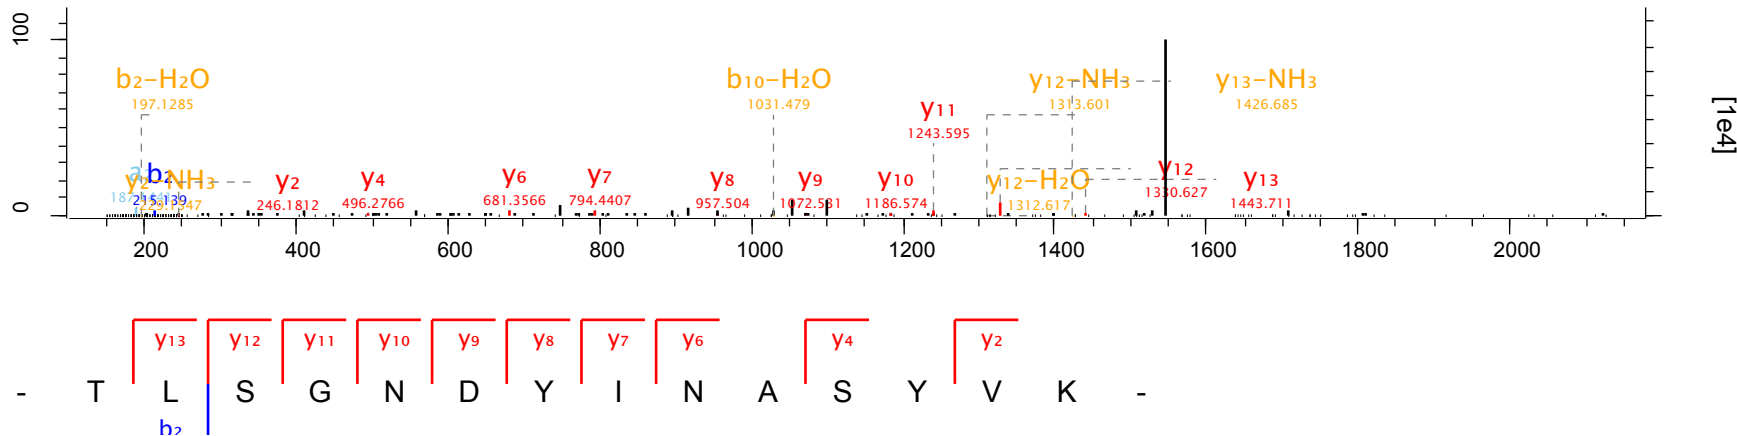

Raw file

Scan

Method

Score

m/z

Gene names

20150306\_yeast3\_Top\_opt\_2ug\_C3\_01\_1667

37821

TOF; CID

47.71

643.33

PHS1

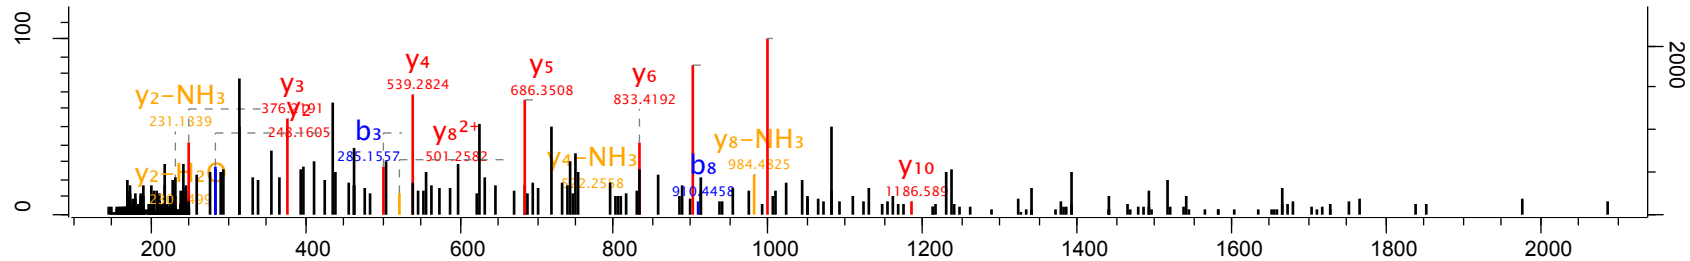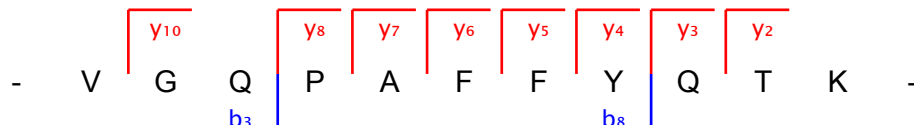

Raw file

Scan

Method

Score

m/z

Gene names

20150306\_yeast3\_Top\_opt\_2ug\_C3\_01\_1667

40566

TOF; CID

46.07

645.35

RAD51

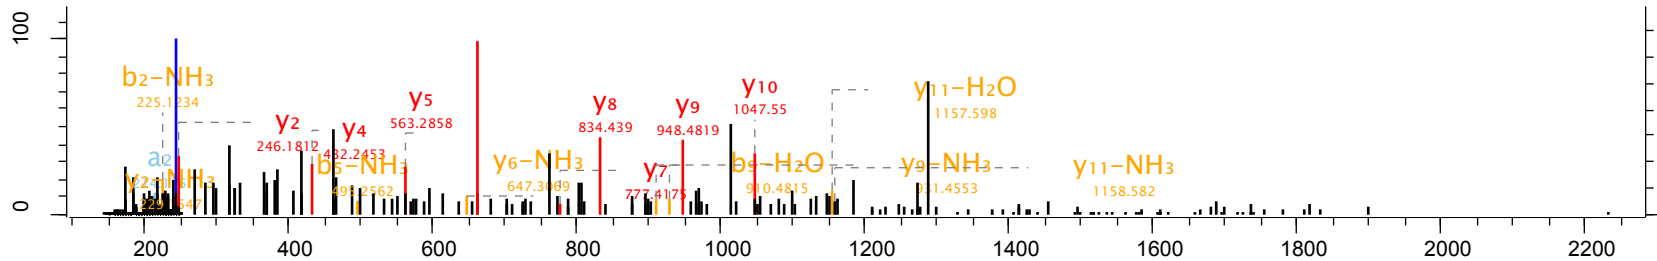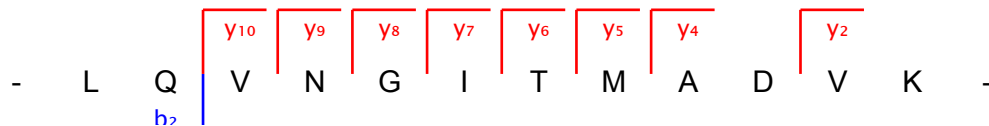

Raw file

Scan

Method

Score

m/z

Gene names

20150306\_yeast3\_Top\_opt\_2ug\_C3\_01\_1667

42709

TOF; CID

58.32

491.27

RML2

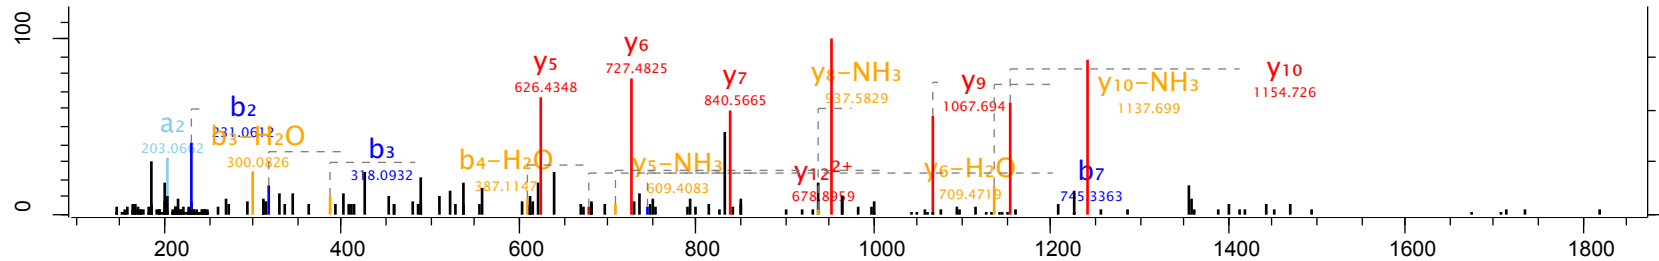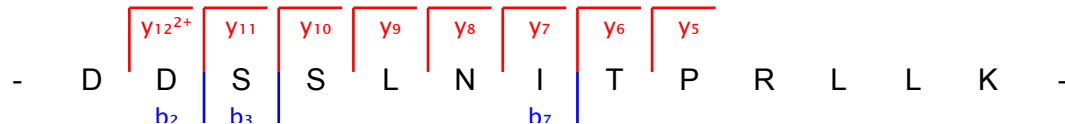

Raw file

Scan

Method

Score

m/z

Gene names

20150306\_yeast3\_Top\_opt\_2ug\_C3\_01\_1667

42716

TOF; CID

79.31

591.29

COX8

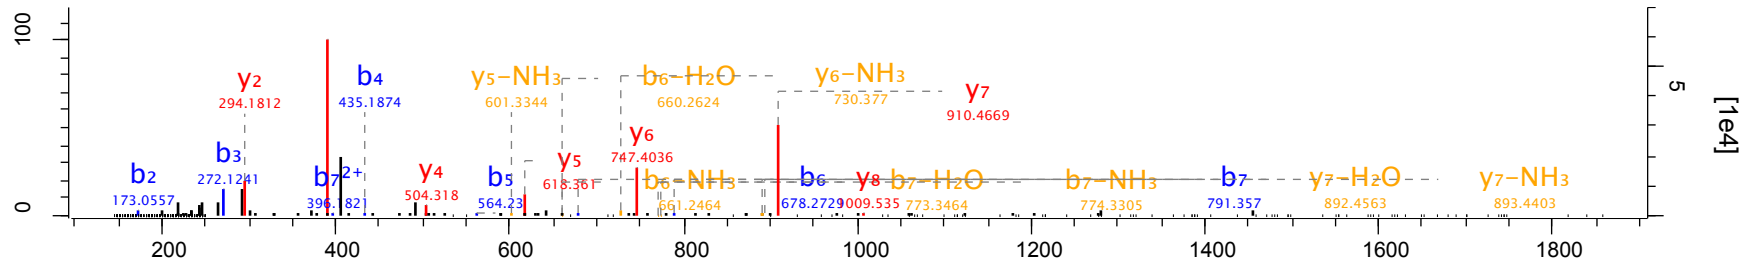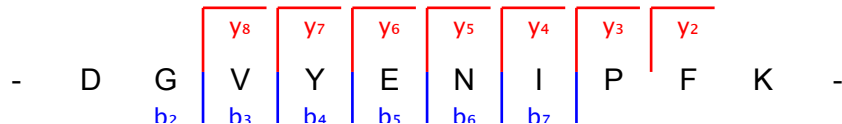

Raw file

Scan

Method

Score

m/z

Gene names

20150306\_yeast3\_Top\_opt\_2ug\_C3\_01\_1667

43088

TOF; CID

60.55

729.4

PEX2

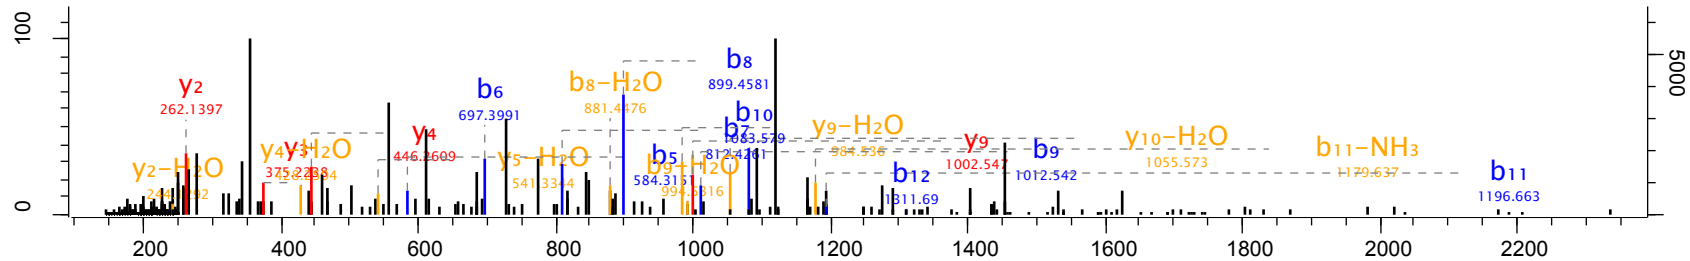

ac

- S R V A Q L D S I A L D K -

h<sub>5</sub> | h<sub>6</sub> | h<sub>7</sub> | h<sub>8</sub> | h<sub>9</sub> | h<sub>10</sub> | h<sub>11</sub> | h<sub>12</sub>

y<sub>9</sub> (above Q), y<sub>4</sub> (above A), y<sub>3</sub> (above L), y<sub>2</sub> (above D)

Raw file

20150306\_yeast3\_Top\_opt\_2ug\_C3\_01\_1667

Scan

43827

Method

TOF; CID

Score

39.91

m/z

699.37

Gene names

YLL019W-A

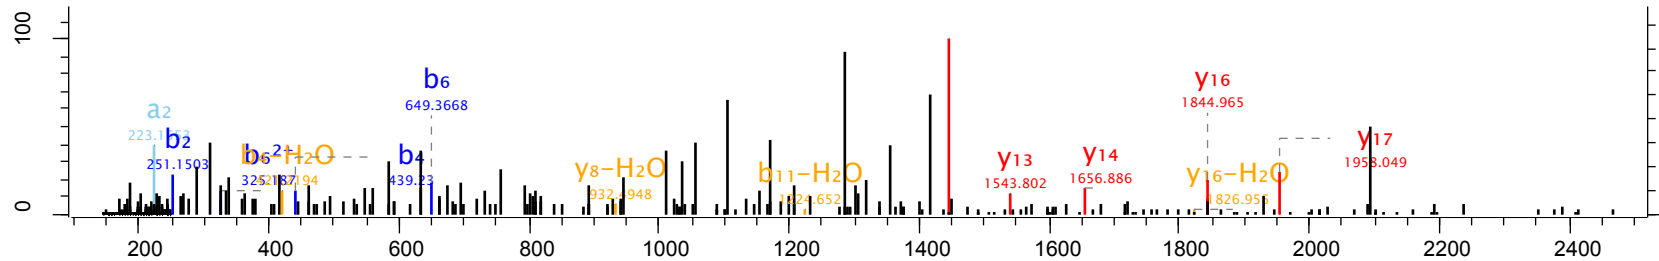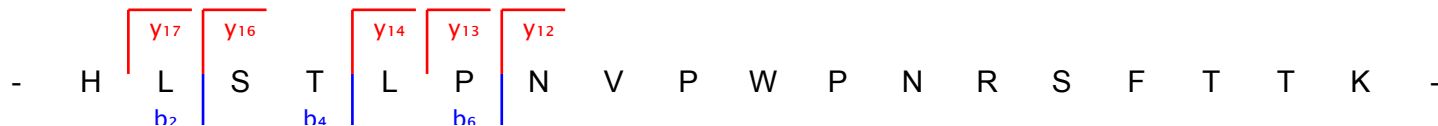



Raw file

Scan

Method

Score

m/z

Gene names

20150306\_yeast3\_Top\_opt\_2ug\_C3\_01\_1667

44346

TOF; CID

130.72

575.29

SRL3

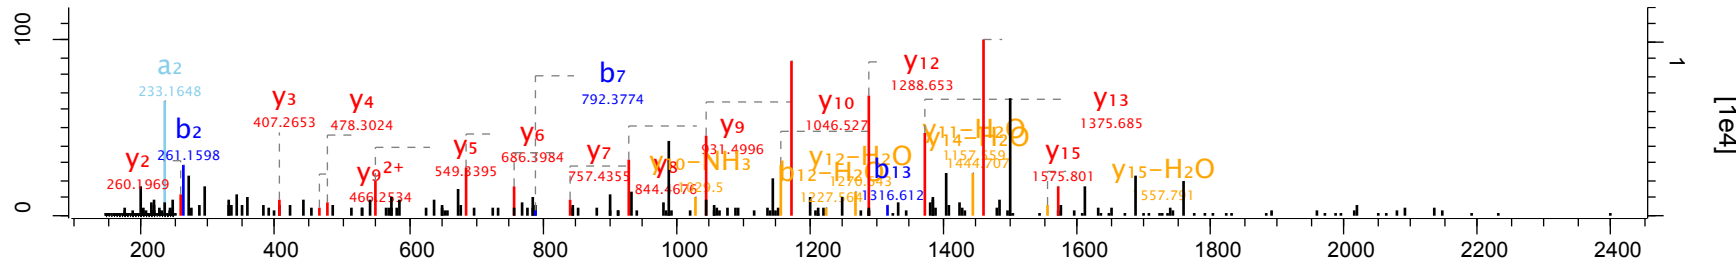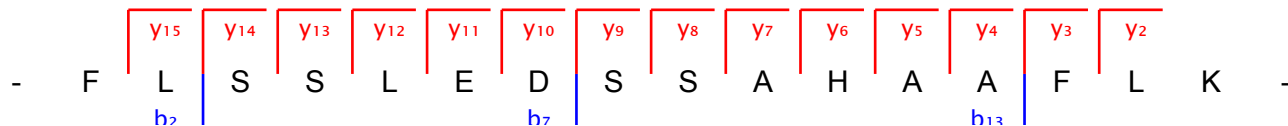

Raw file

Scan

Method

Score

m/z

Gene names

20150306\_yeast3\_Top\_opt\_2ug\_C3\_01\_1667

44772

TOF; CID

70.99

799.07

MRPL51

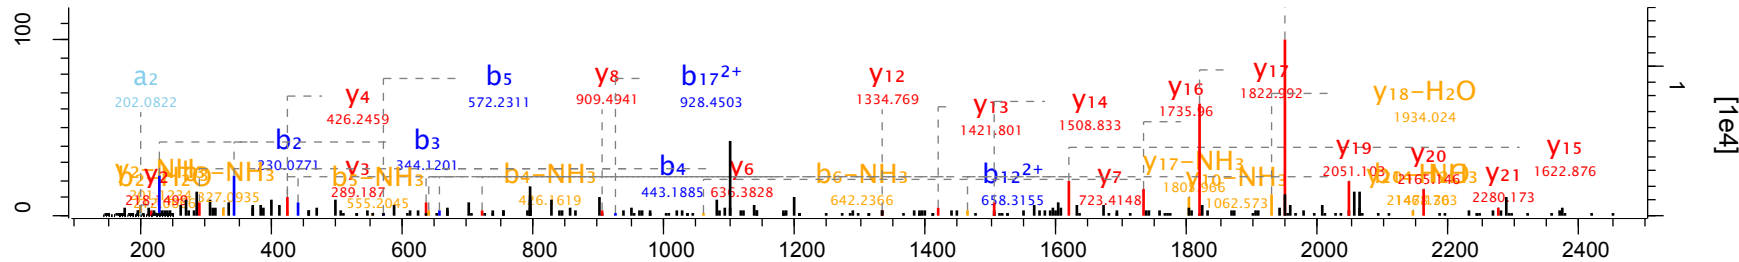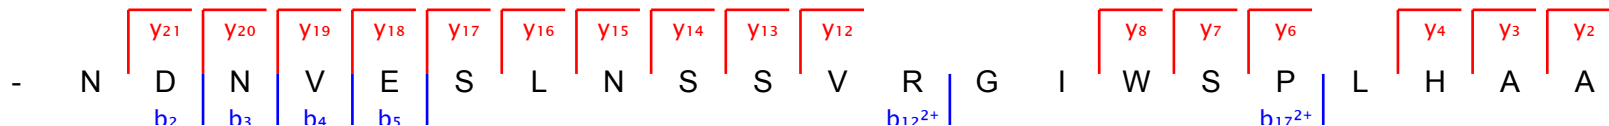

Raw file

Scan

Method

Score

m/z

Gene names

20150306\_yeast3\_Top\_opt\_2ug\_C3\_01\_1667

47717

TOF; CID

66.69

495.27

FAR7

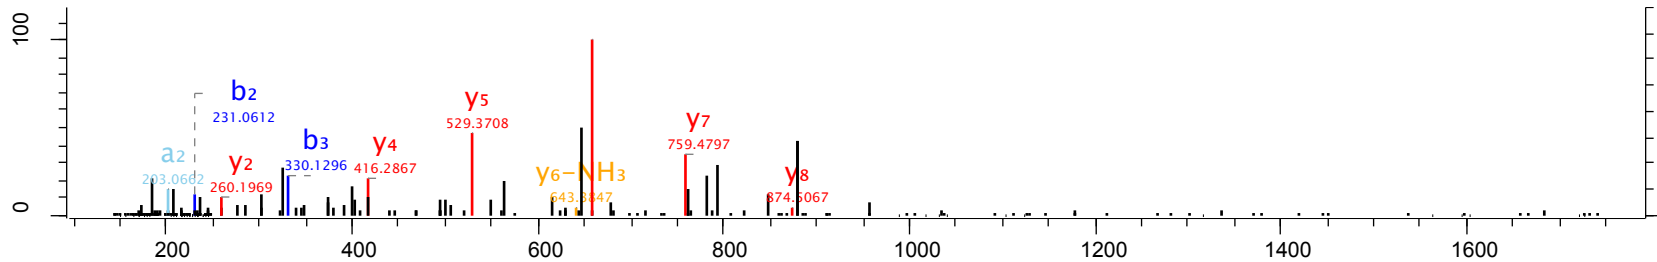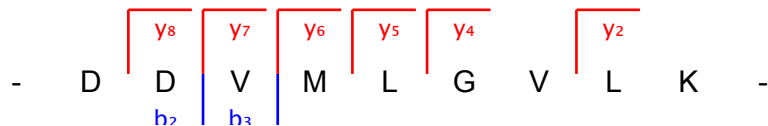

Raw file

Scan

Method

Score

m/z

Gene names

20150306\_yeast3\_Top\_opt\_2ug\_C3\_01\_1667

49948

TOF; CID

47.68

667.34

PUS9

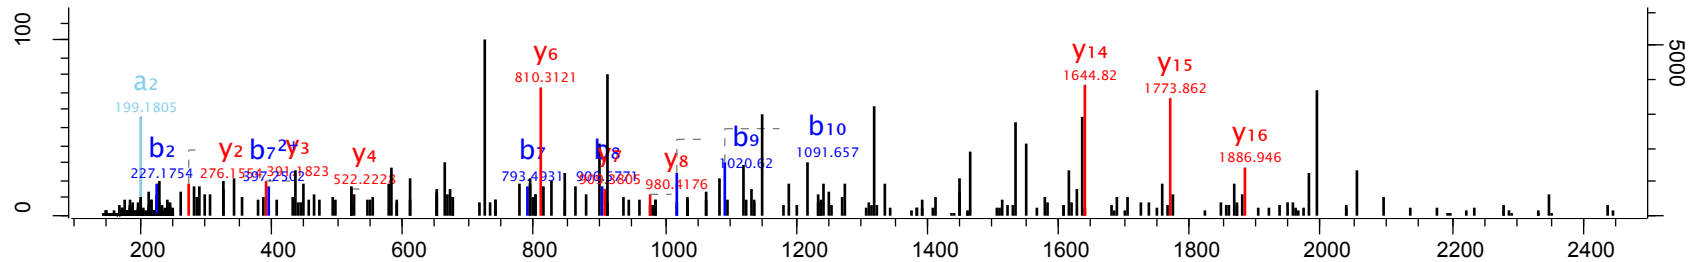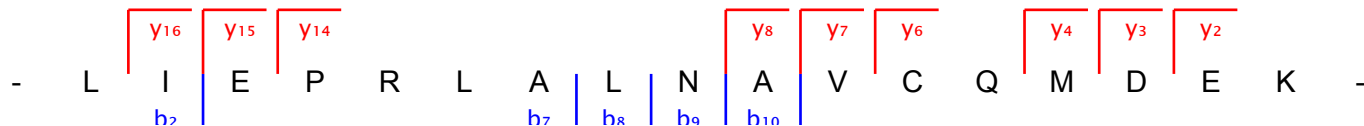

Raw file

Scan

Method

Score

m/z

Gene names

20150306\_yeast3\_Top\_opt\_2ug\_C3\_01\_1667

53076

TOF; CID

125.98

906.41

ART5

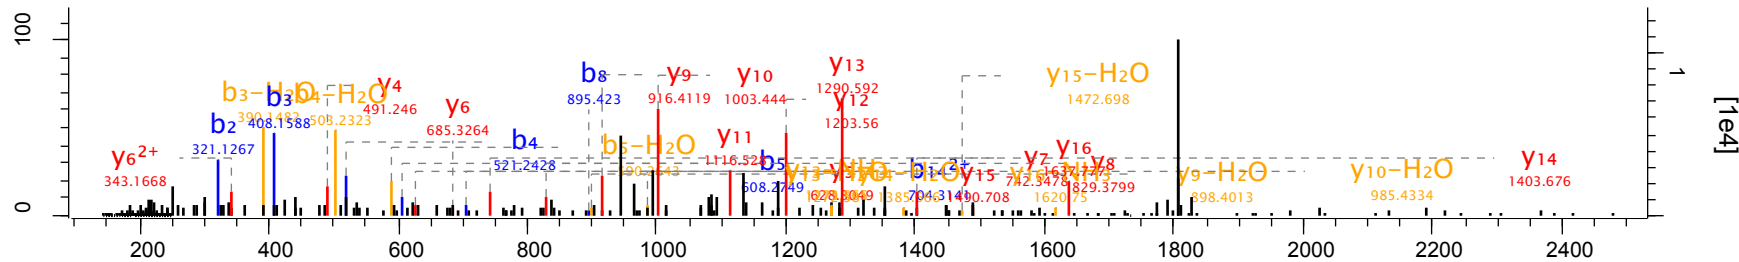

ac

M

y<sub>16</sub>  
F  
b<sub>2</sub>y<sub>15</sub>  
S  
b<sub>3</sub>y<sub>14</sub>  
L  
b<sub>4</sub>y<sub>13</sub>  
S  
b<sub>5</sub>y<sub>12</sub>  
Sy<sub>11</sub>  
Ly<sub>10</sub>  
S  
b<sub>8</sub>y<sub>9</sub>  
Sy<sub>8</sub>  
Sy<sub>7</sub>  
Gy<sub>6</sub>  
Gy<sub>5</sub>  
Hy<sub>4</sub>  
S  
b<sub>14</sub><sup>2+</sup>

E

Q

K

-

Raw file

Scan

Method

Score

m/z

Gene names

20150306\_yeast3\_Top\_opt\_2ug\_C3\_01\_1667

56113

TOF; CID

63.09

1033.12

UMP1

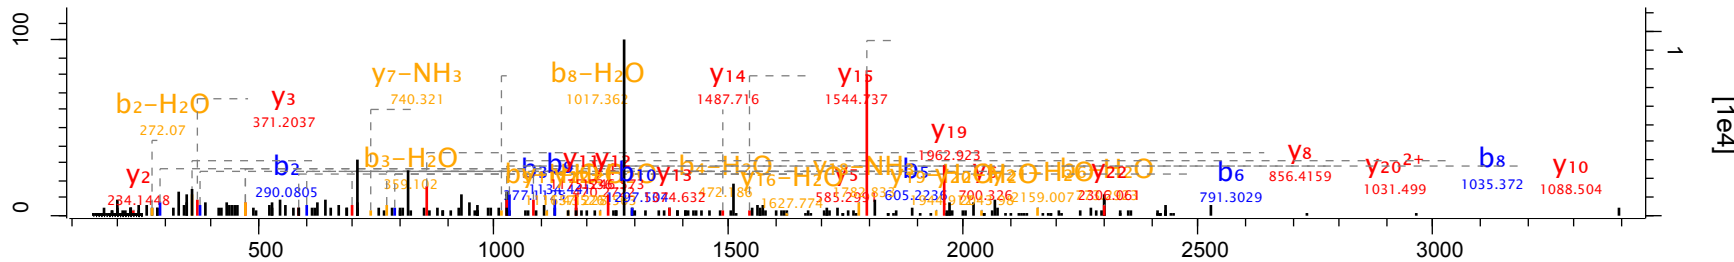

- E C S I D W E D V Y P G T G L Q A S T M V

h<sub>2</sub> | h<sub>3</sub> | h<sub>5</sub> | h<sub>6</sub> | h<sub>8</sub> | h<sub>9</sub> | h<sub>10</sub>

y<sub>22</sub> | y<sub>20</sub><sup>2+</sup> | y<sub>19</sub> | y<sub>18</sub> | y<sub>15</sub> | y<sub>14</sub> | y<sub>13</sub> | y<sub>12</sub> | y<sub>11</sub> | y<sub>10</sub> | y<sub>8</sub>

Raw file

Scan

Method

Score

m/z

Gene names

20150306\_yeast3\_Top\_opt\_2ug\_C3\_01\_1667

57129

TOF; CID

48.62

1098.03

UBX3

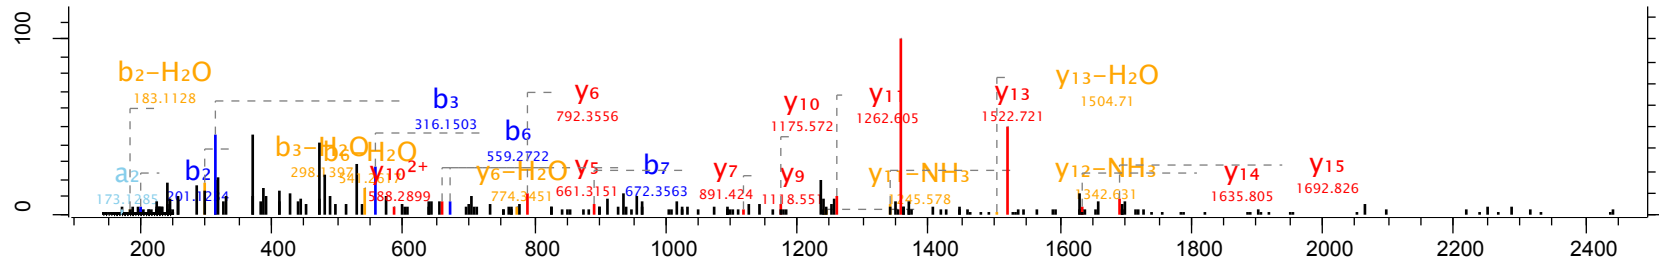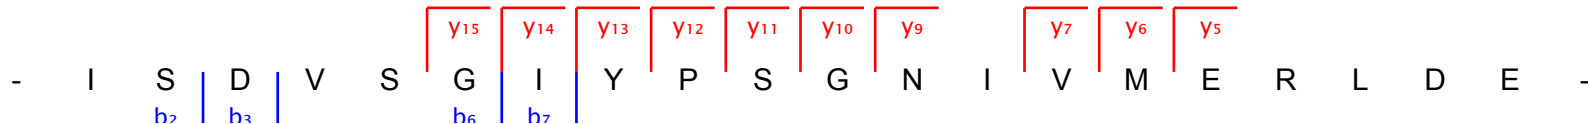

Raw file

20150306\_yeast3\_Top\_opt\_2ug\_C3\_01\_1667

Scan

57706

Method

TOF; CID

Score

82.89

m/z

870.41

Gene names

YLR243W

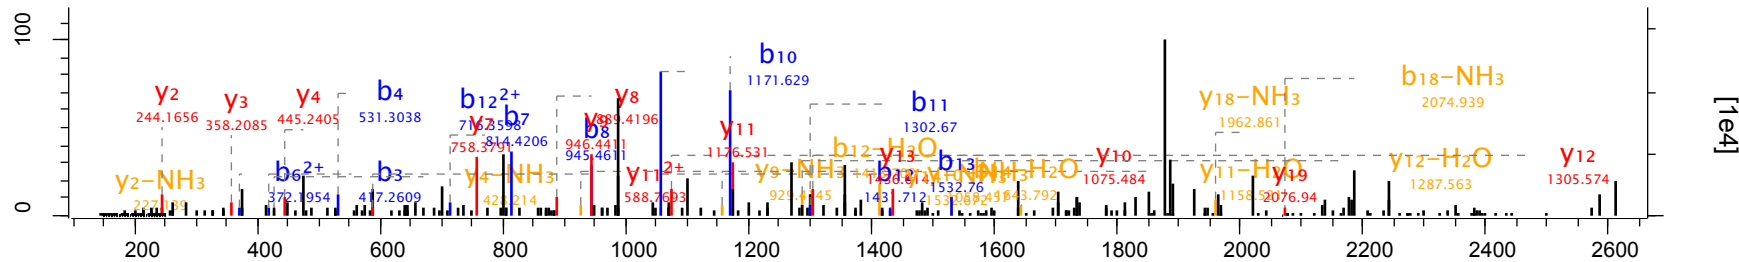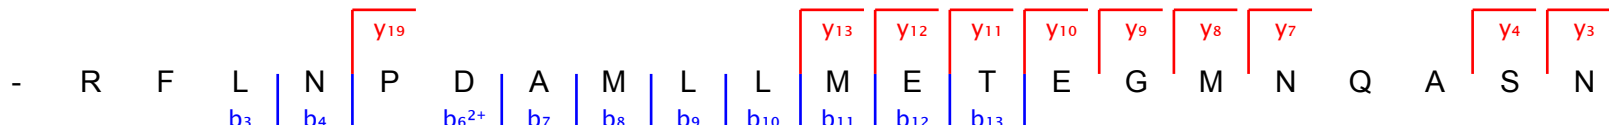



Raw file

Scan

Method

Score

m/z

Gene names

20150306\_yeast3\_Top\_opt\_2ug\_C3\_01\_1667

65689

TOF; CID

80.66

1018.51

OSW5

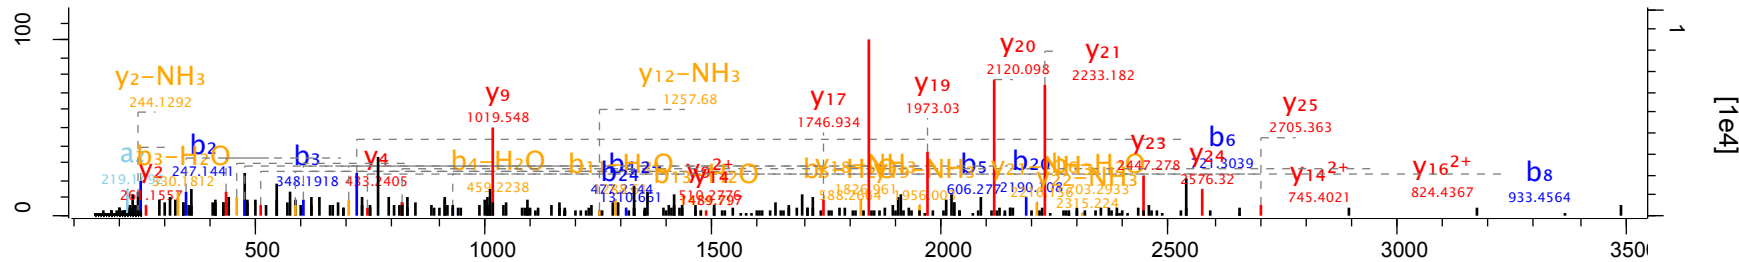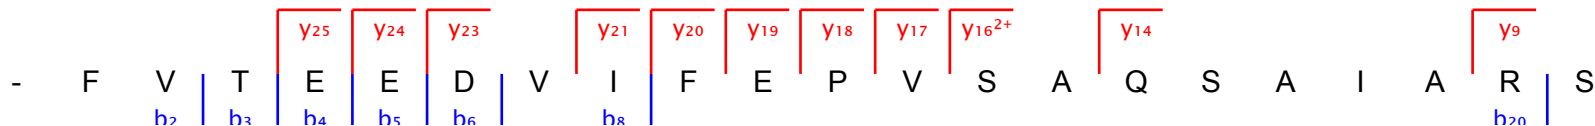

Raw file

20150306\_yeast3\_Top\_opt\_2ug\_C3\_01\_1667

Scan

65867

Method

TOF; CID

Score

49.45

m/z

659.36

Gene names

MIC10

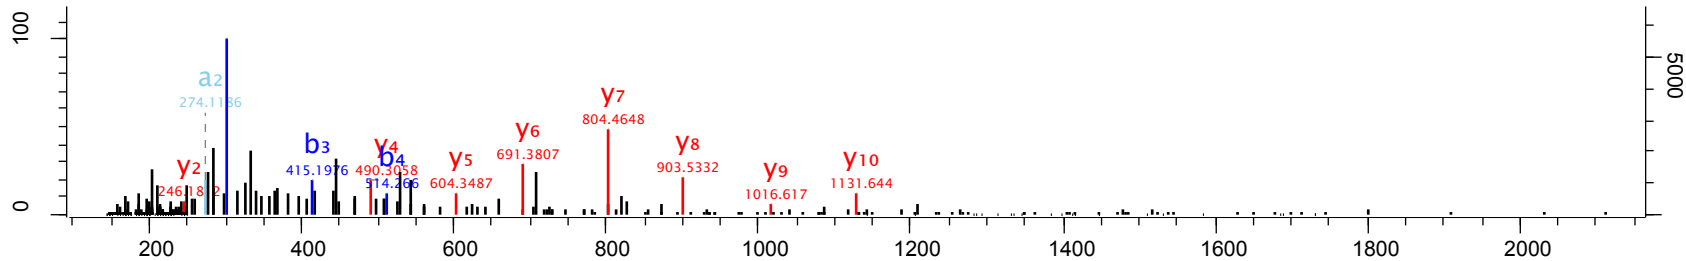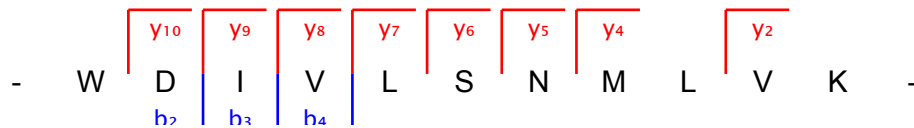

Raw file

Scan

Method

Score

m/z

Gene names

20150306\_yeast3\_Top\_opt\_2ug\_C3\_01\_1667

71001

TOF; CID

75.54

849.49

APQ12

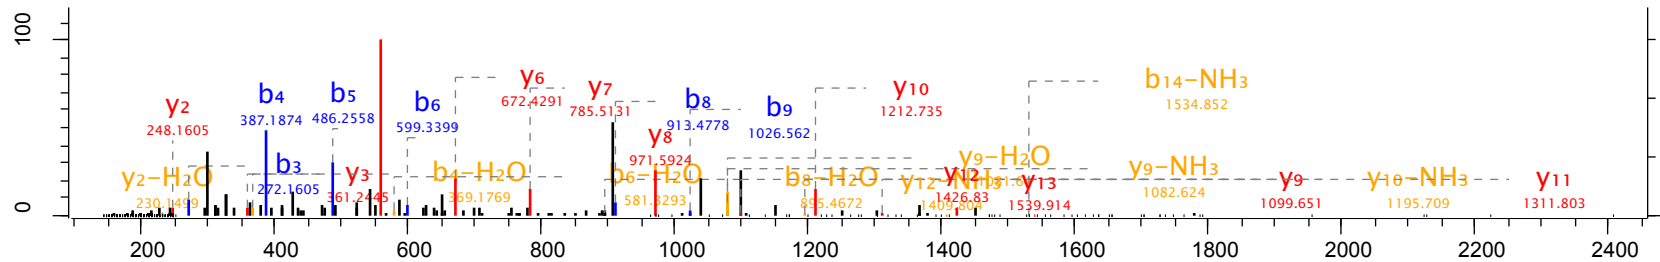

[1e4]

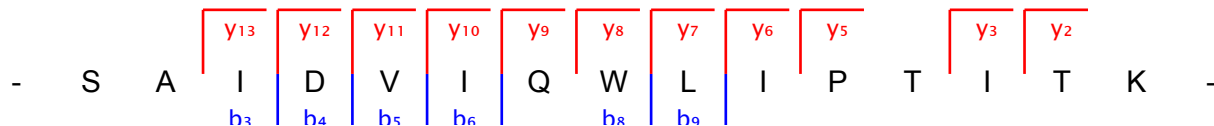

Raw file

Scan

Method

Score

m/z

Gene names

20150306\_yeast3\_Top\_opt\_2ug\_C3\_01\_1669

9243

TOF; CID

93.32

581.75

YDR286C

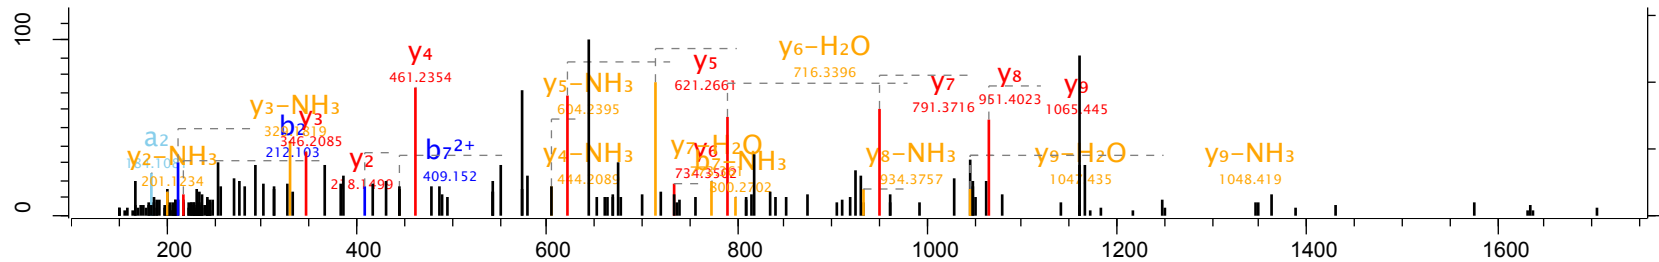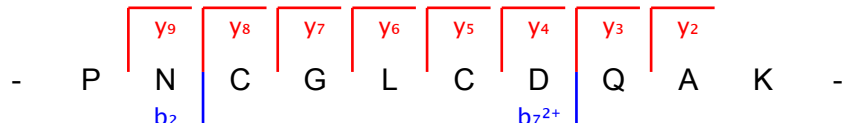

Raw file

20150306\_yeast3\_Top\_opt\_2ug\_C3\_01\_1669

Scan

10238

Method

TOF; CID

Score

47.08

m/z

611.28

Gene names

ERT1

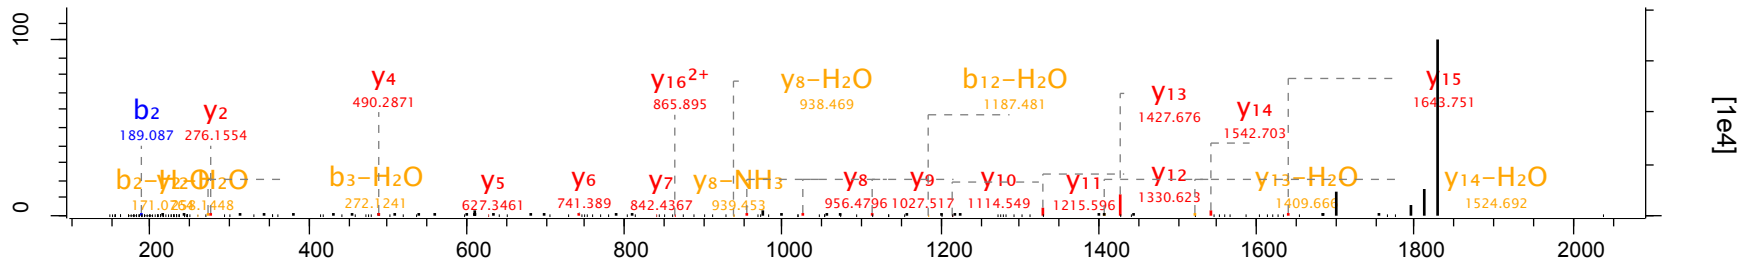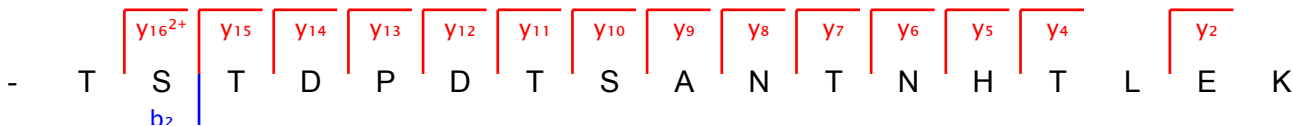

Raw file

Scan

Method

Score

m/z

Gene names

20150306\_yeast3\_Top\_opt\_2ug\_C3\_01\_1669

10890

TOF; CID

89.35

493.76

PDH1

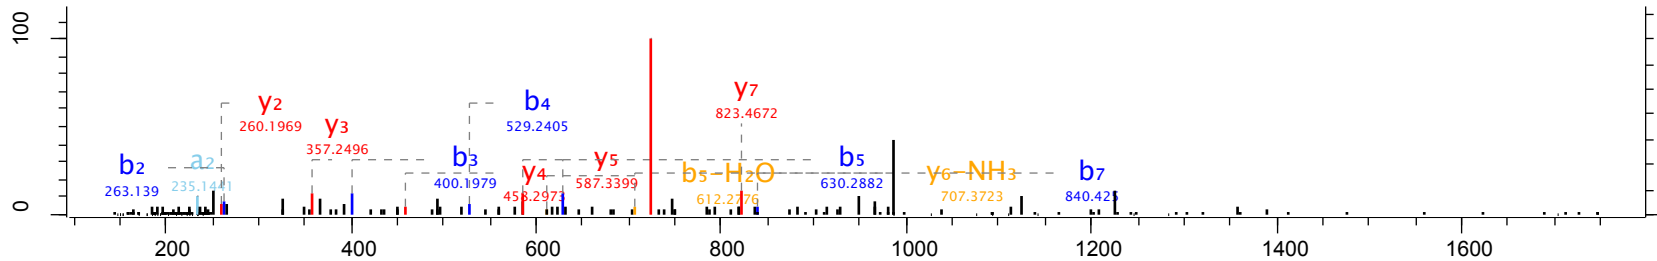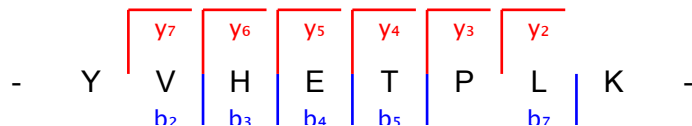

Raw file

Scan

Method

Score

m/z

Gene names

20150306\_yeast3\_Top\_opt\_2ug\_C3\_01\_1669

11493

TOF; CID

58.7

526.26

PRY1

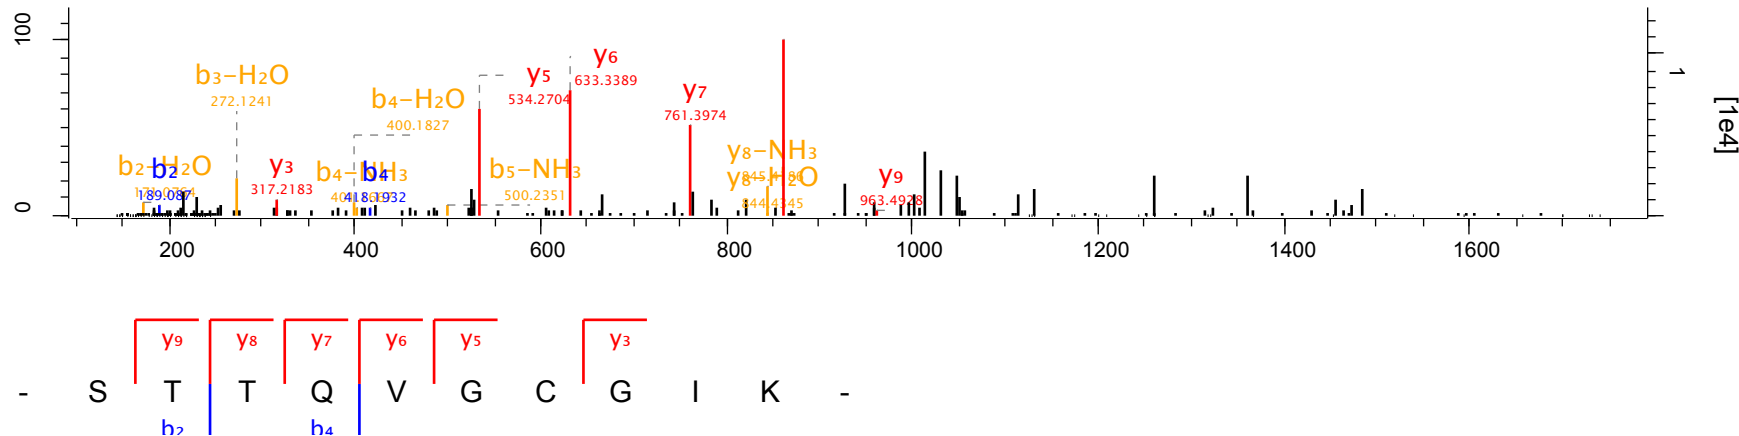

Raw file

20150306\_yeast3\_Top\_opt\_2ug\_C3\_01\_1669

Scan

12842

Method

TOF; CID

Score

55.34

m/z

923.89

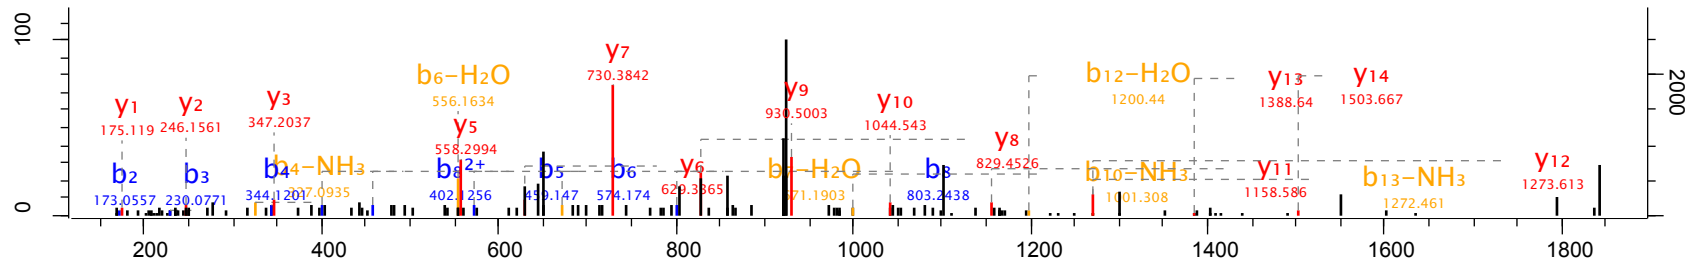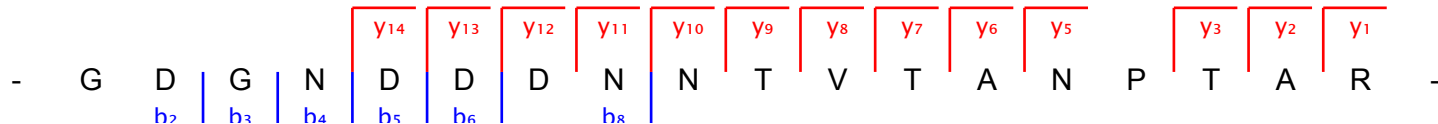



Raw file

Scan

Method

Score

m/z

Gene names

20150306\_yeast3\_Top\_opt\_2ug\_C3\_01\_1669

15161

TOF; CID

39.36

886.42

CLB2

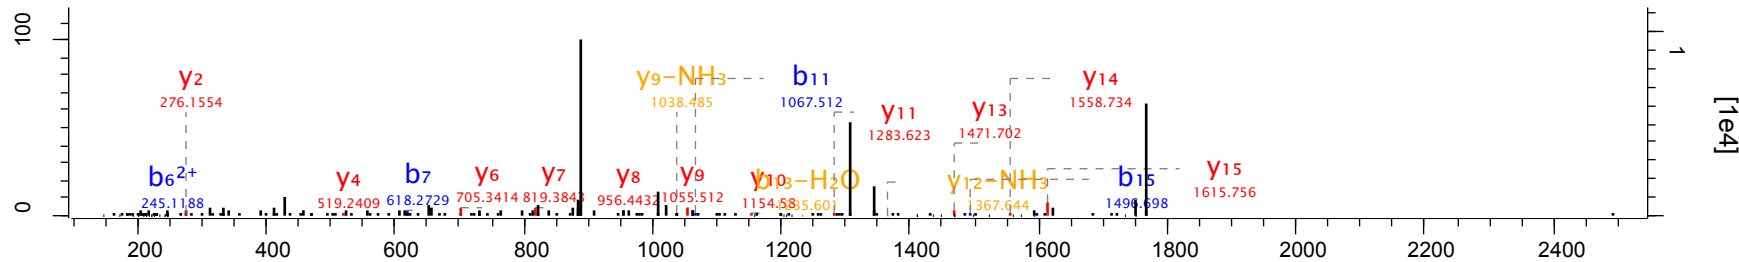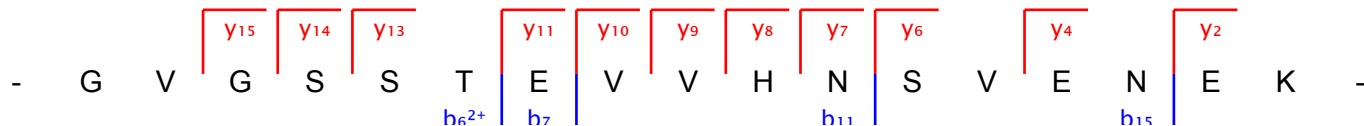

Raw file

20150306\_yeast3\_Top\_opt\_2ug\_C3\_01\_1669

Scan

15707

Method

TOF; CID

Score

186.16

m/z

492.59

Gene names

YDL085C-A

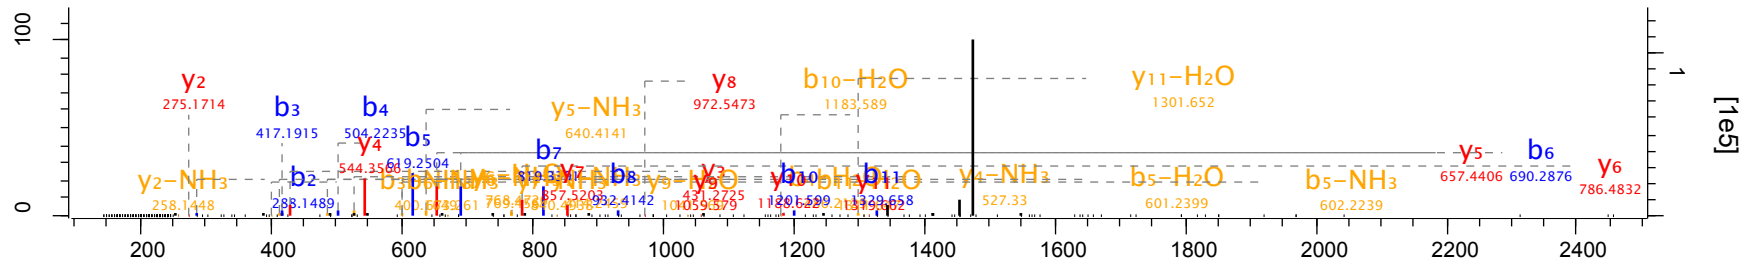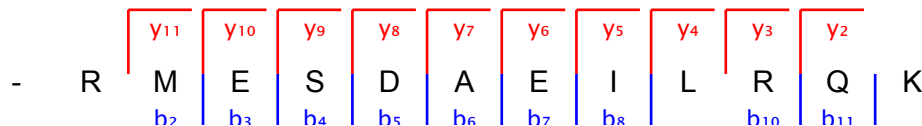

Raw file

Scan

Method

Score

m/z

20150306\_yeast3\_Top\_opt\_2ug\_C3\_01\_1669

18530

TOF; CID

81.02

624.25

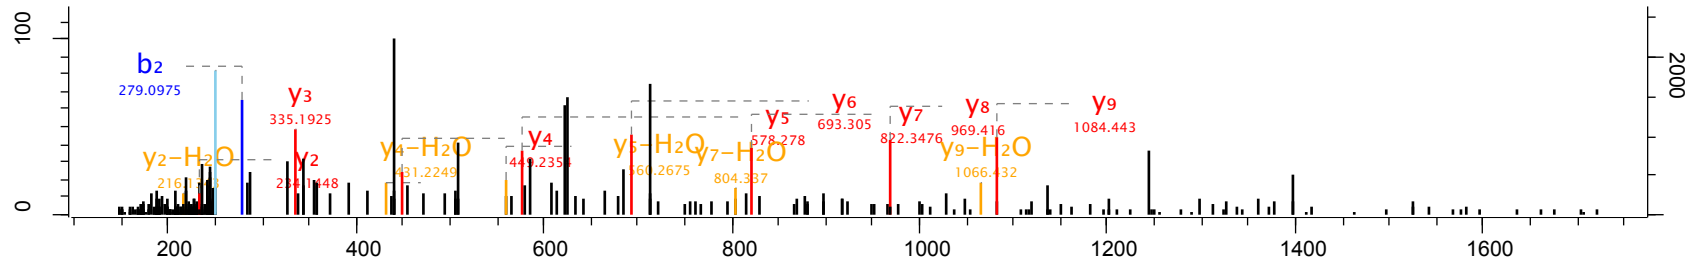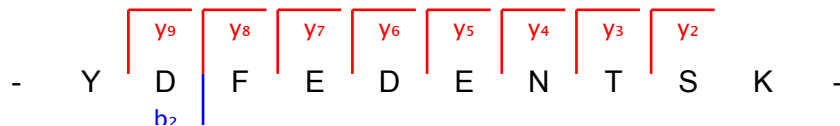

Raw file

Scan

Method

Score

m/z

Gene names

20150306\_yeast3\_Top\_opt\_2ug\_C3\_01\_1669

18972

TOF; CID

50.11

578.32

LIF1

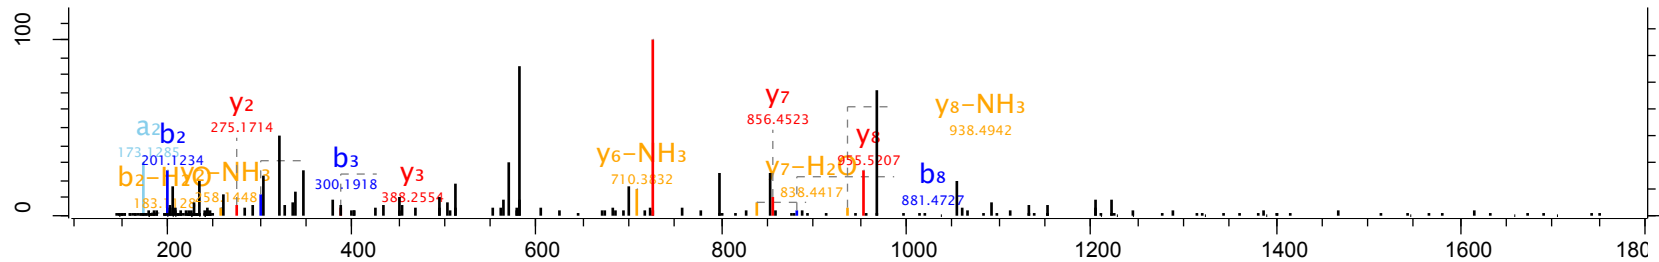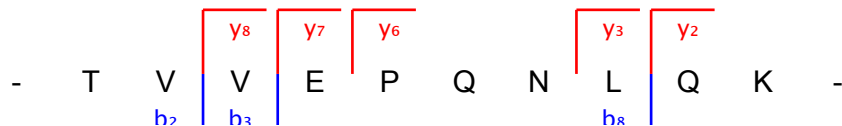

Raw file

Scan

Method

Score

m/z

20150306\_yeast3\_Top\_opt\_2ug\_C3\_01\_1669

24236

TOF; CID

54.65

703.33

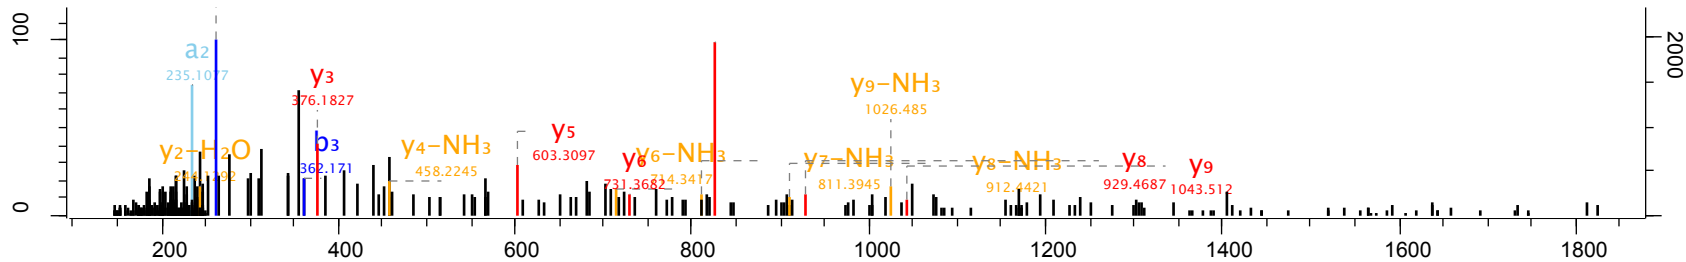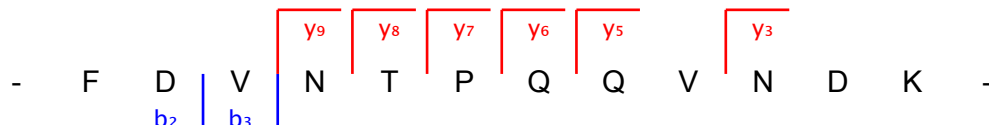

Raw file

Scan

Method

Score

m/z

Gene names

20150306\_yeast3\_Top\_opt\_2ug\_C3\_01\_1669

27583

TOF; CID

54.83

994.47

CHS6

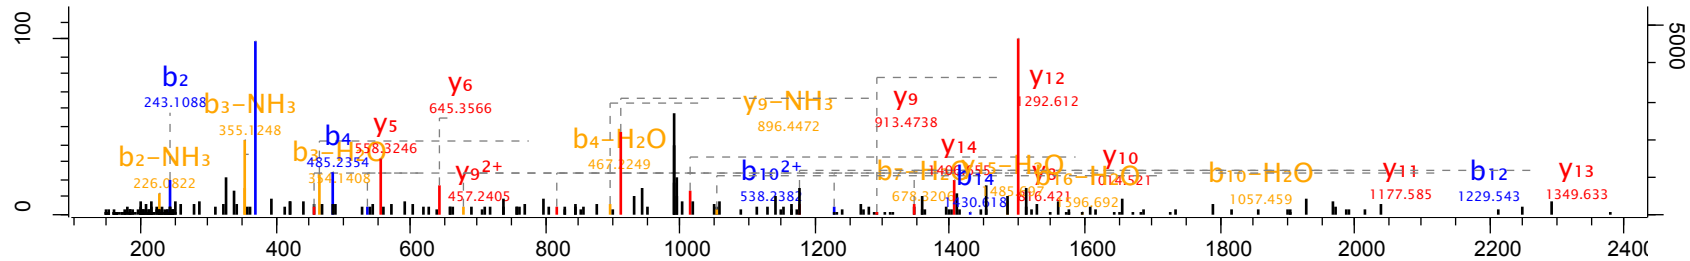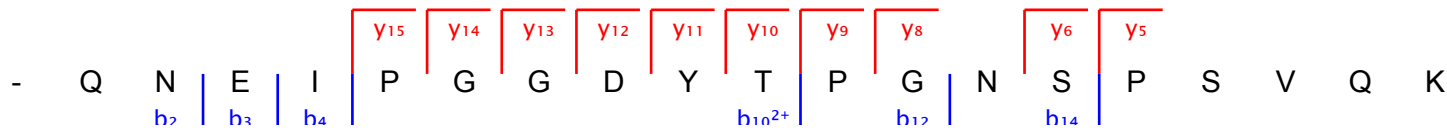

Raw file

Scan

Method

Score

m/z

Gene names

20150306\_yeast3\_Top\_opt\_2ug\_C3\_01\_1669

28120

TOF; CID

153.56

893.03

CCW14

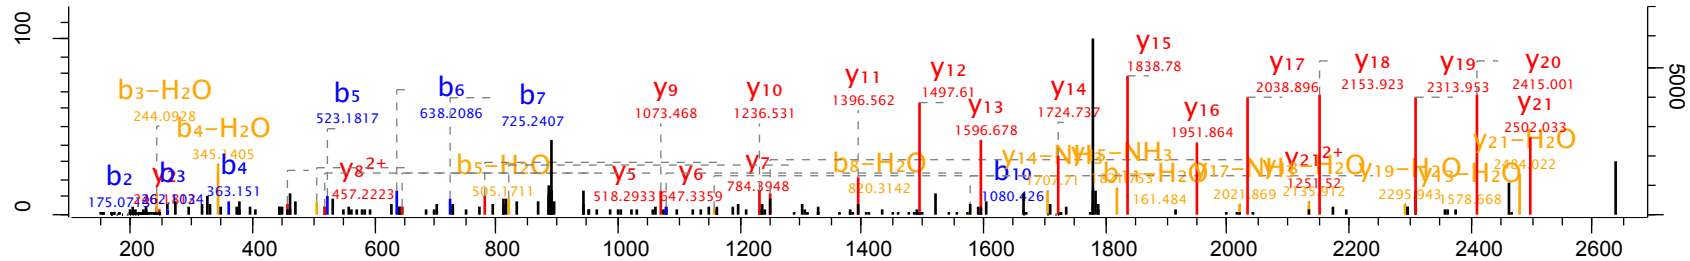

- S S S T C D S L N Q V T C Y C E H E N S A

h<sub>2</sub> h<sub>3</sub> h<sub>4</sub> h<sub>5</sub> h<sub>6</sub> h<sub>7</sub> h<sub>10</sub>

y<sub>21</sub> y<sub>20</sub> y<sub>19</sub> y<sub>18</sub> y<sub>17</sub> y<sub>16</sub> y<sub>15</sub> y<sub>14</sub> y<sub>13</sub> y<sub>12</sub> y<sub>11</sub> y<sub>10</sub> y<sub>9</sub> y<sub>8</sub><sup>2+</sup> y<sub>7</sub> y<sub>6</sub> y<sub>5</sub>

Raw file

Scan

Method

Score

m/z

Gene names

20150306\_yeast3\_Top\_opt\_2ug\_C3\_01\_1669

30012

TOF; CID

62.19

671.59

SRB5

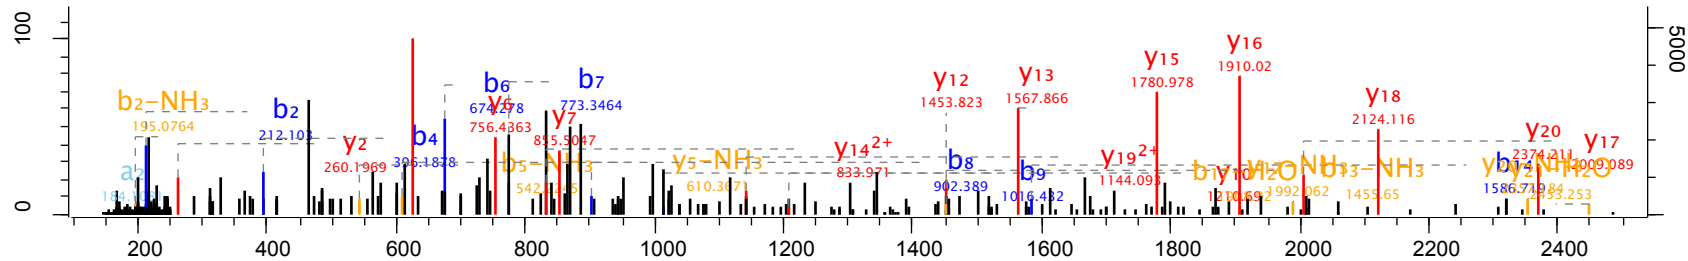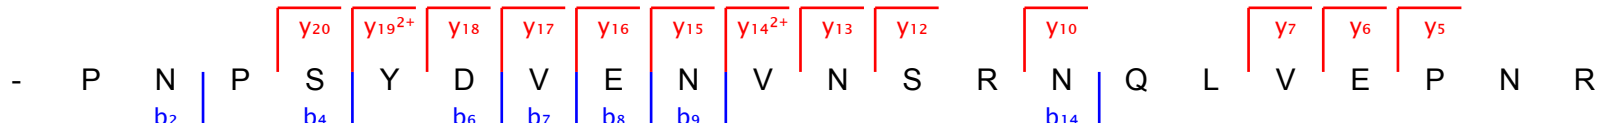



Raw file

20150306\_yeast3\_Top\_opt\_2ug\_C3\_01\_1669

Scan

30041

Method

TOF; CID

Score

72.23

m/z

479.76

Gene names

SNT309

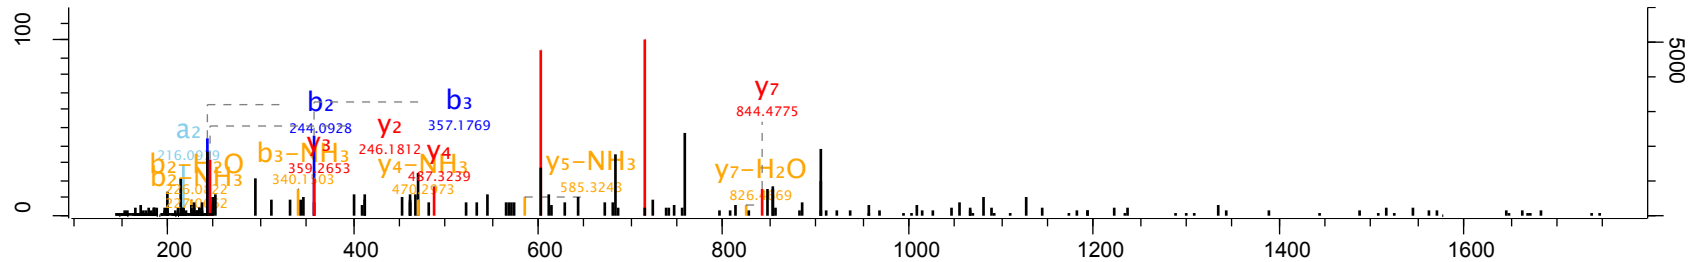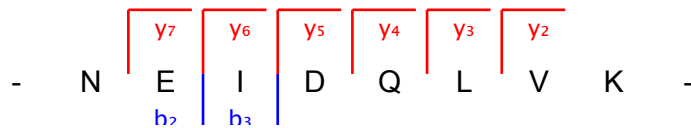

Raw file

Scan

Method

Score

m/z

Gene names

20150306\_yeast3\_Top\_opt\_2ug\_C3\_01\_1669

31018

TOF; CID

120.9

1080.43

OMA1

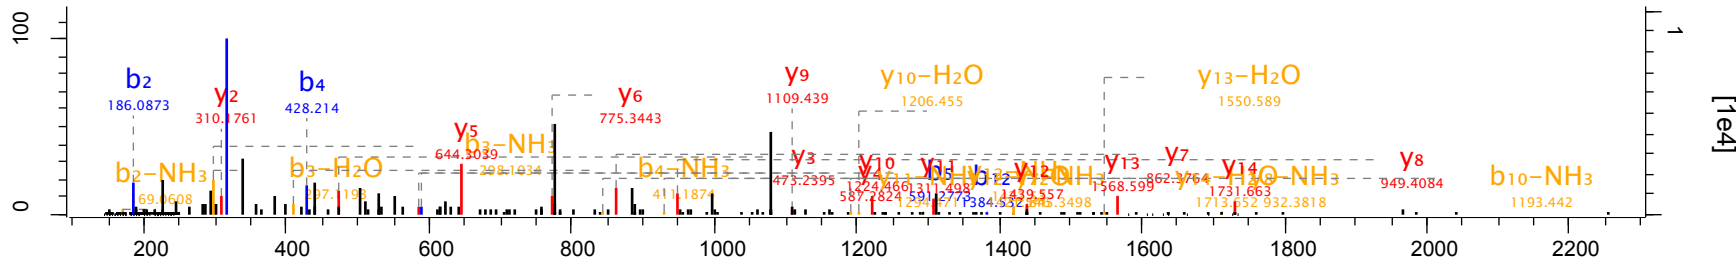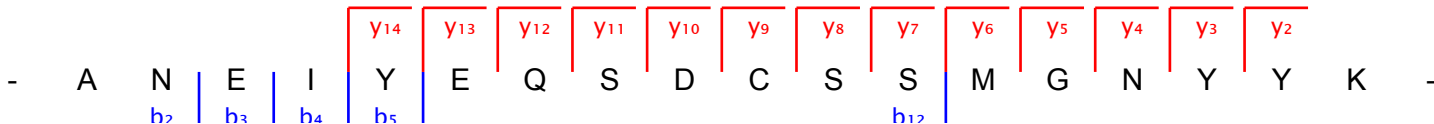

Raw file

Scan

Method

Score

m/z

Gene names

20150306\_yeast3\_Top\_opt\_2ug\_C3\_01\_1669

32550

TOF; CID

71.52

563.3

SPP382

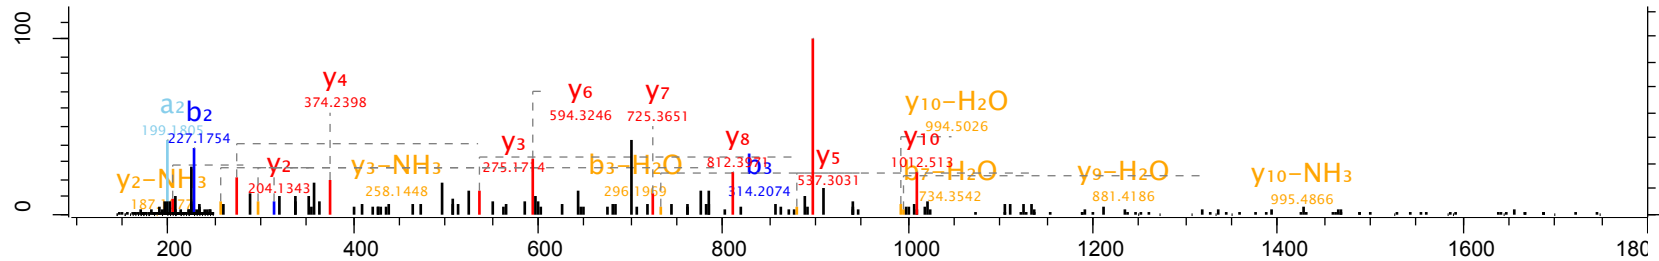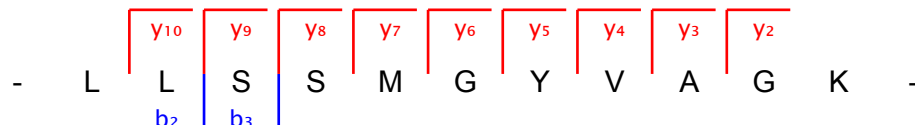

Raw file

Scan

Method

Score

m/z

20150306\_yeast3\_Top\_opt\_2ug\_C3\_01\_1669

33216

TOF; CID

52.66

833.38

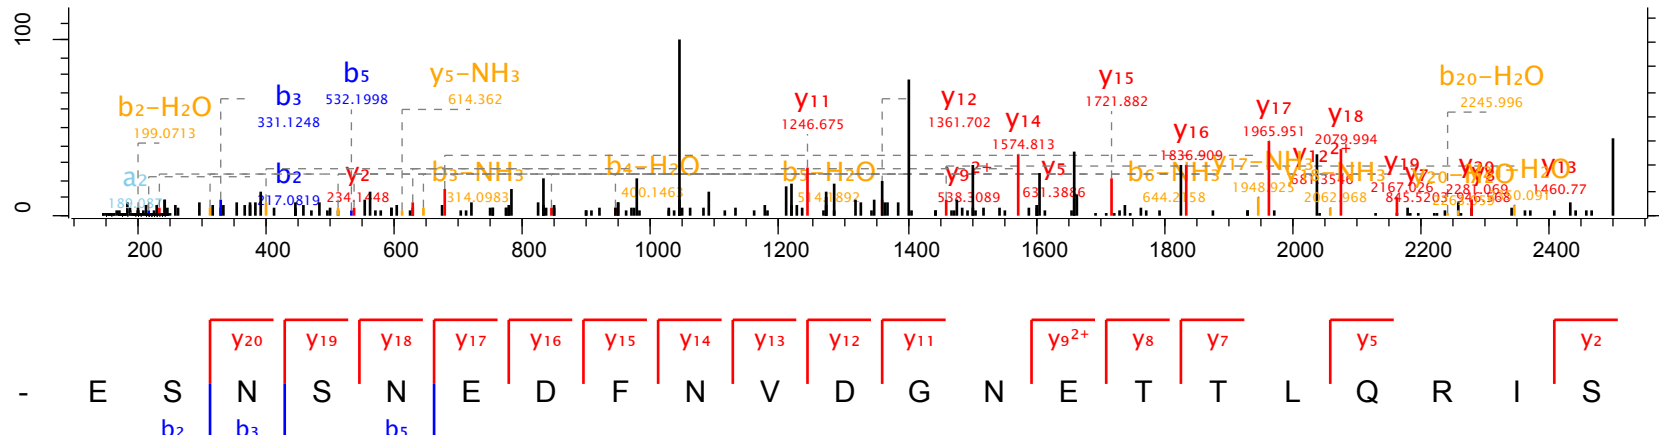

Raw file

20150306\_yeast3\_Top\_opt\_2ug\_C3\_01\_1669

Scan

38786

Method

TOF; CID

Score

144.56

m/z

748.86

Gene names

MLF3

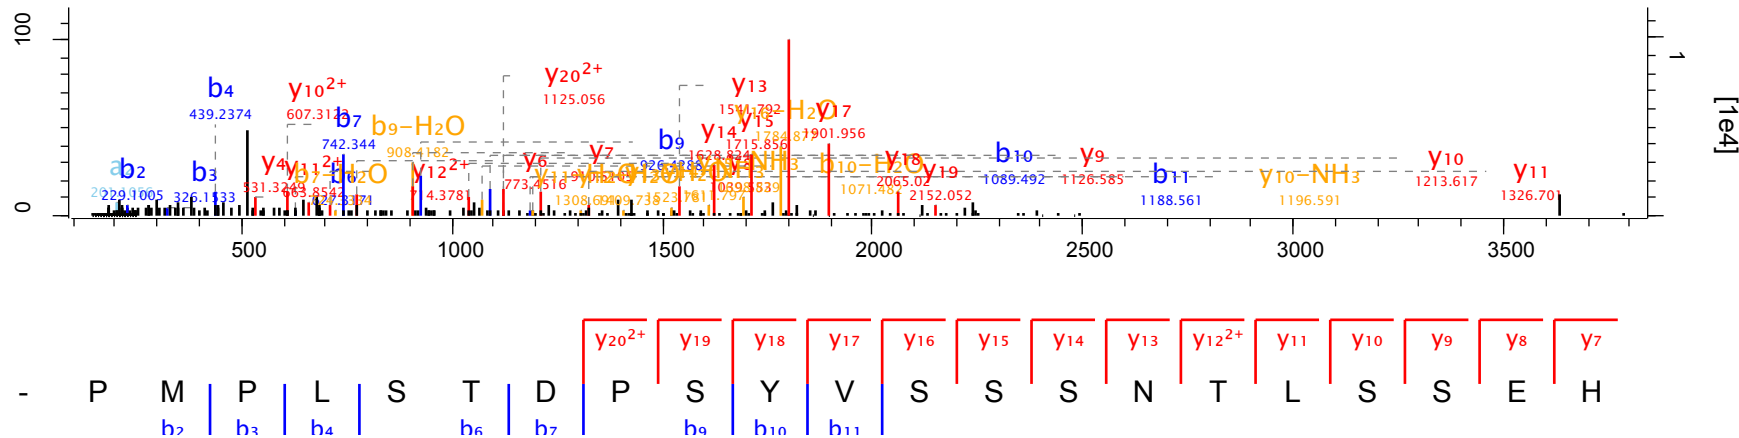

Raw file

Scan

Method

Score

m/z

Gene names

20150306\_yeast3\_Top\_opt\_2ug\_C3\_01\_1669

38976

TOF; CID

84.74

451.29

STB4

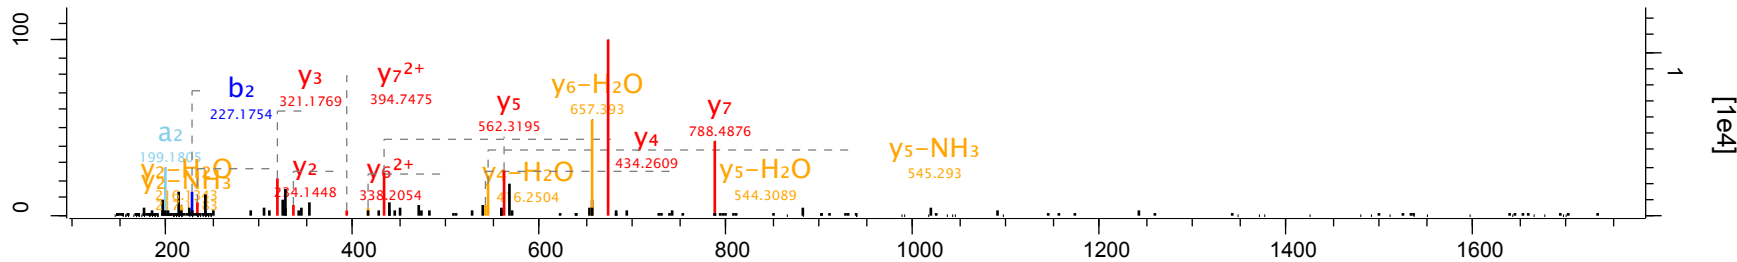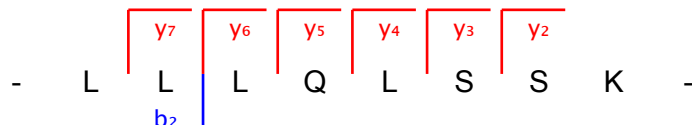

Raw file

Scan

Method

Score

m/z

Gene names

20150306\_yeast3\_Top\_opt\_2ug\_C3\_01\_1669

39084

TOF; CID

56.51

819.41

NBP1

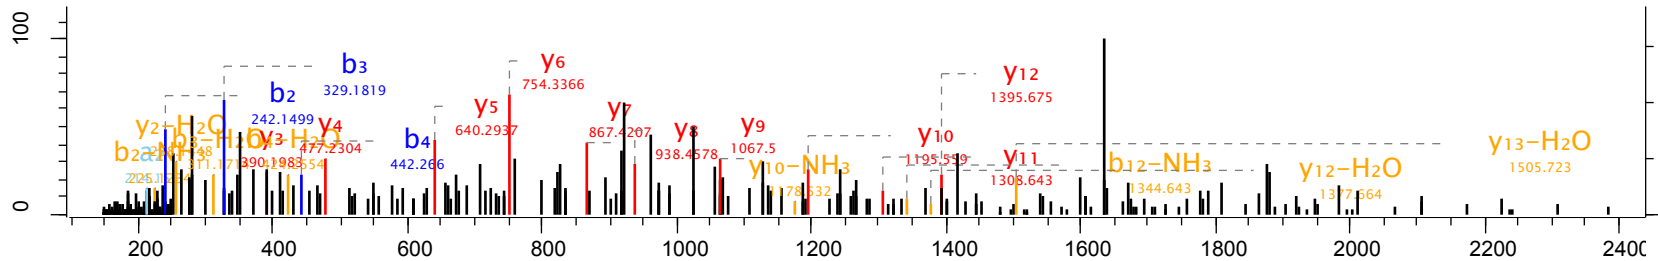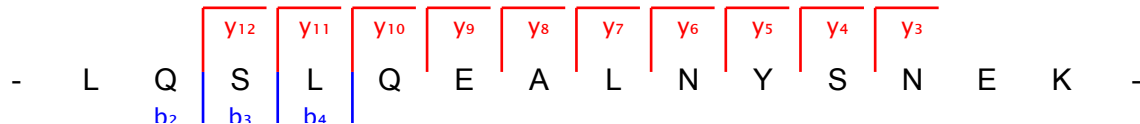

Raw file

Scan

Method

Score

m/z

20150306\_yeast3\_Top\_opt\_2ug\_C3\_01\_1669

39547

TOF; CID

58.04

497.62

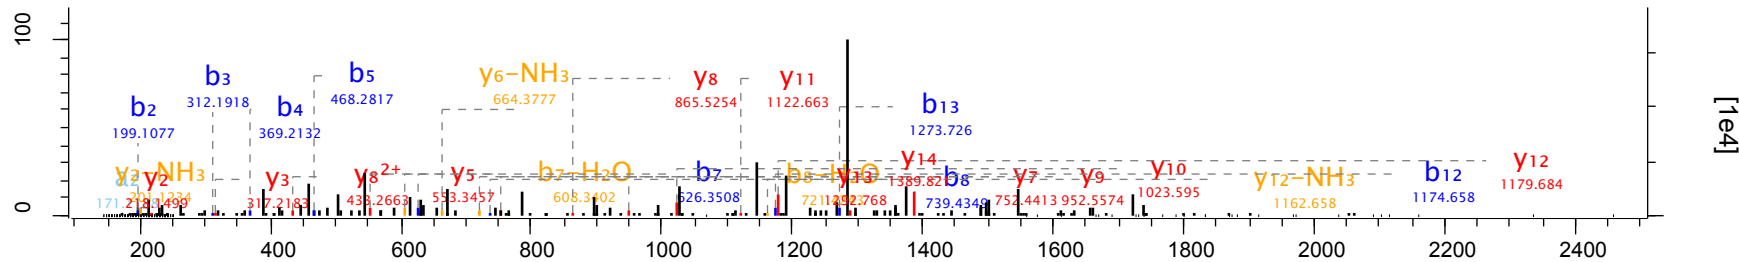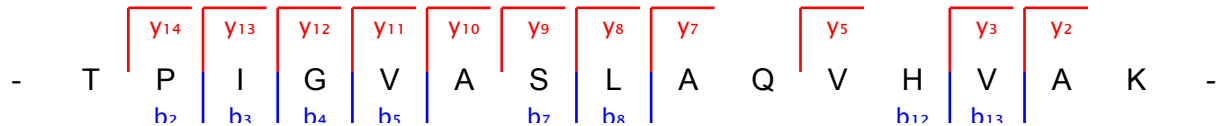



Raw file

Scan

Method

Score

m/z

Gene names

20150306\_yeast3\_Top\_opt\_2ug\_C3\_01\_1669

41183

TOF; CID

91.32

443.78

CUL3

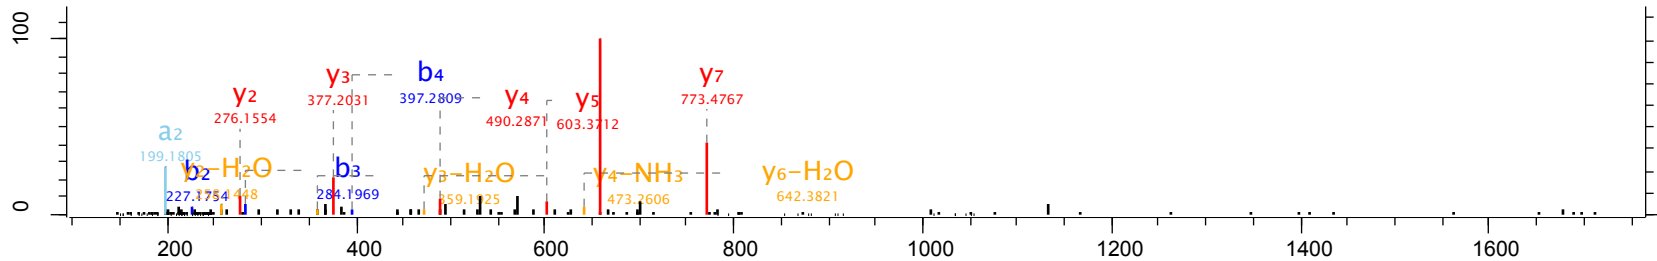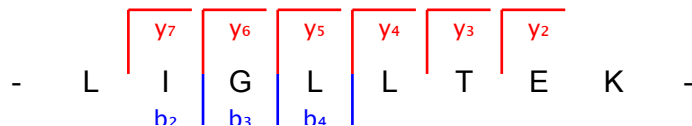

Raw file

Scan

Method

Score

m/z

Gene names

20150306\_yeast3\_Top\_opt\_2ug\_C3\_01\_1669

43157

TOF; CID

128.57

466.28

NTF2

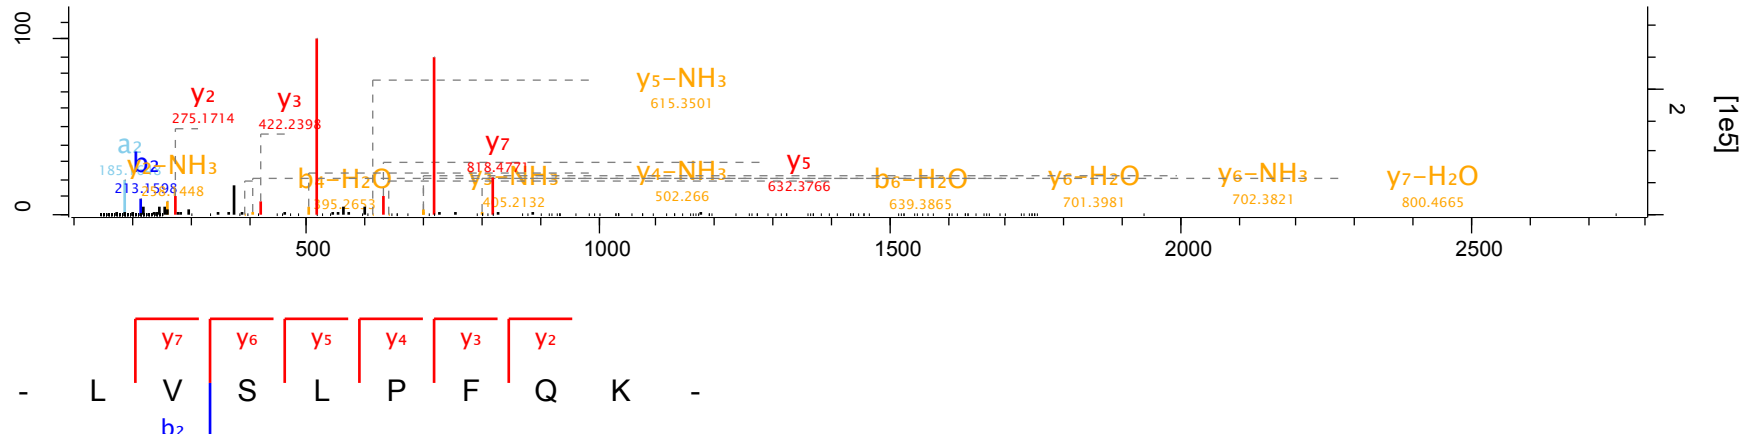

Raw file

Scan

Method

Score

m/z

Gene names

20150306\_yeast3\_Top\_opt\_2ug\_C3\_01\_1669

44841

TOF; CID

64.7

716.65

YLR177W

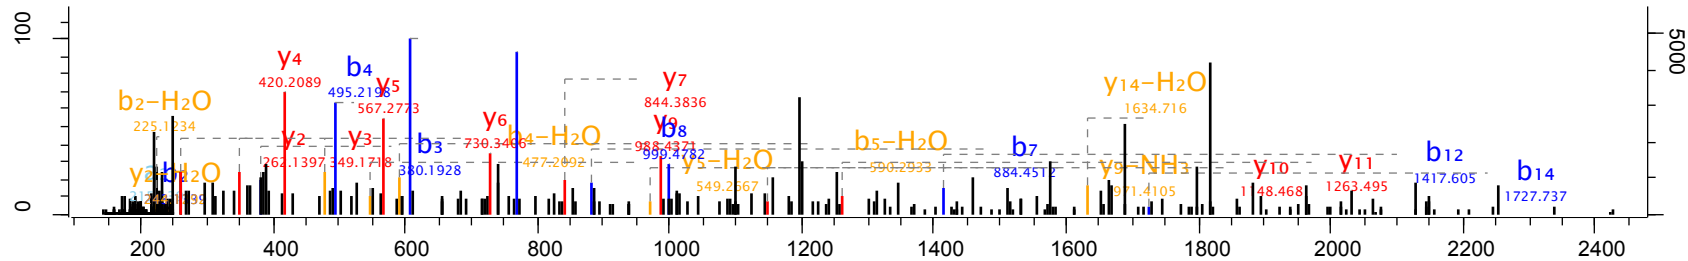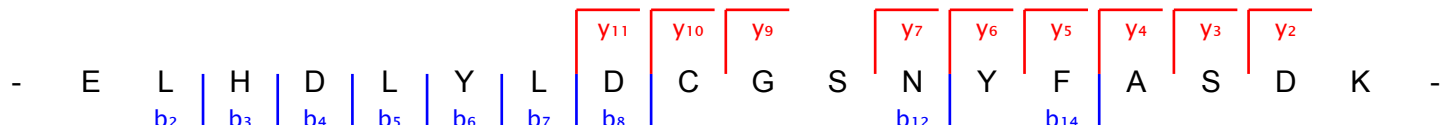

Raw file

Scan

Method

Score

m/z

Gene names

20150306\_yeast3\_Top\_opt\_2ug\_C3\_01\_1669

45421

TOF; CID

41.7

746.37

FMP45

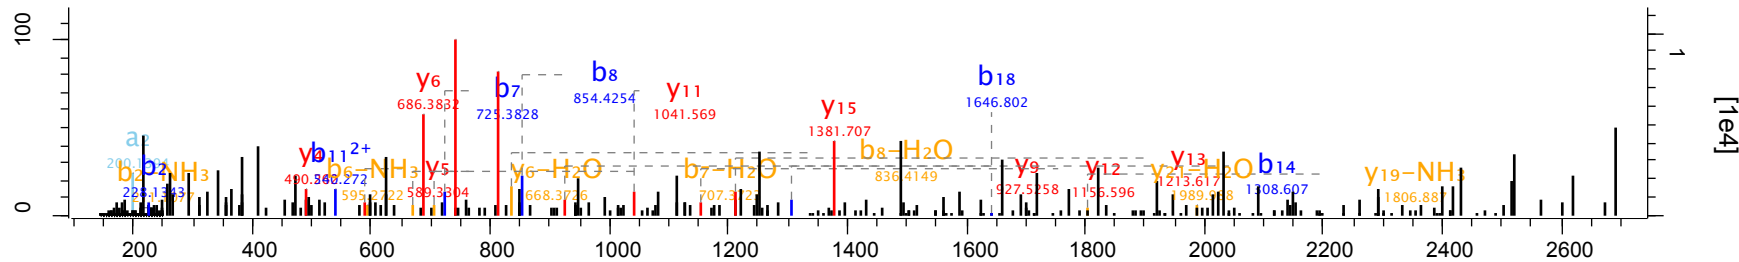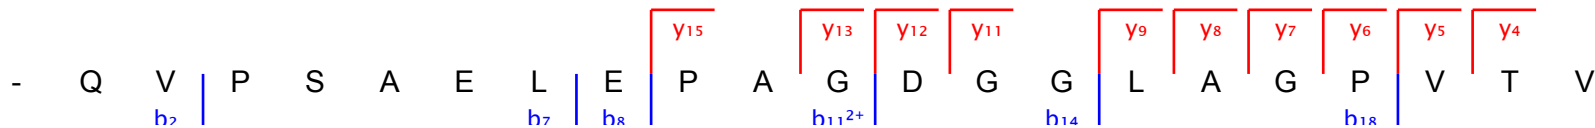

Raw file

20150306\_yeast3\_Top\_opt\_2ug\_C3\_01\_1669

Scan

46128

Method

TOF; CID

Score

142.32

m/z

923.92

Gene names

RPC11

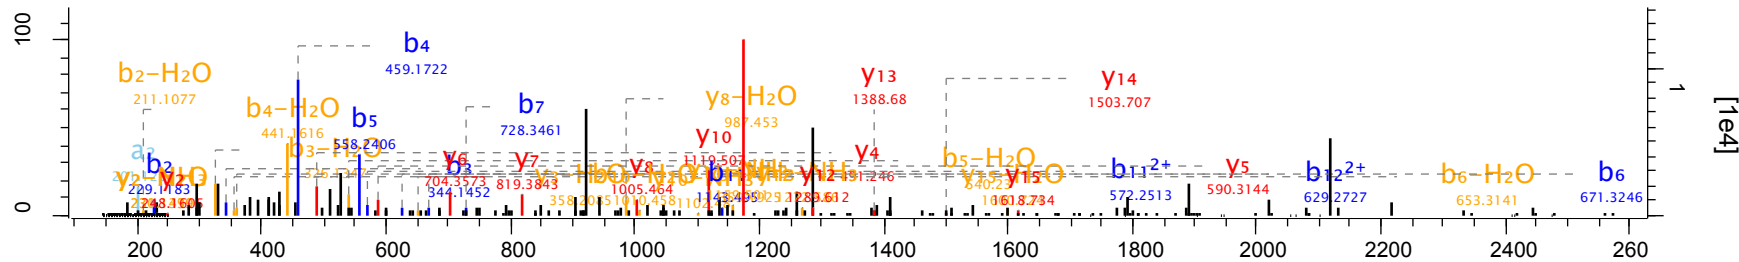

- E V D D V L G G G W D N V D Q T K -

b<sub>2</sub>
y<sub>15</sub>
y<sub>14</sub>
y<sub>13</sub>
y<sub>12</sub>
y<sub>11</sub>
y<sub>10</sub>
y<sub>8</sub>
y<sub>7</sub>
y<sub>6</sub>
y<sub>5</sub>
y<sub>4</sub>
y<sub>2</sub>

b<sub>3</sub>
b<sub>4</sub>
b<sub>5</sub>
b<sub>6</sub>
b<sub>7</sub>
b<sub>11</sub>
b<sub>12</sub><sup>2+</sup>

Raw file

Scan

Method

Score

m/z

Gene names

20150306\_yeast3\_Top\_opt\_2ug\_C3\_01\_1669

51578

TOF; CID

40.94

754.37

LST7

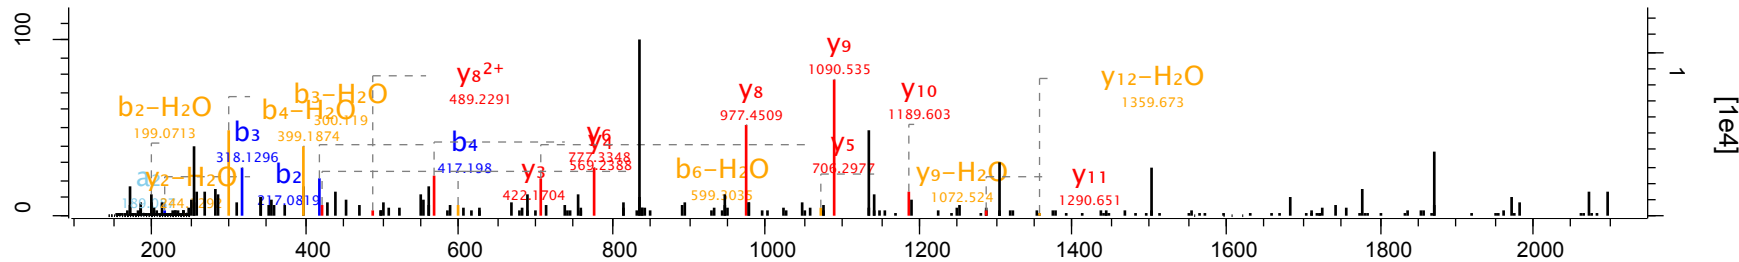

ac

- S S T V I S L A H F C D K -

b<sub>2</sub>b<sub>3</sub>b<sub>4</sub>y<sub>11</sub>y<sub>10</sub>y<sub>9</sub>y<sub>8</sub>y<sub>6</sub>y<sub>5</sub>y<sub>4</sub>y<sub>3</sub>

Raw file

Scan

Method

Score

m/z

Gene names

20150306\_yeast3\_Top\_opt\_2ug\_C3\_01\_1669

52101

TOF; CID

60.64

655.39

MKK2

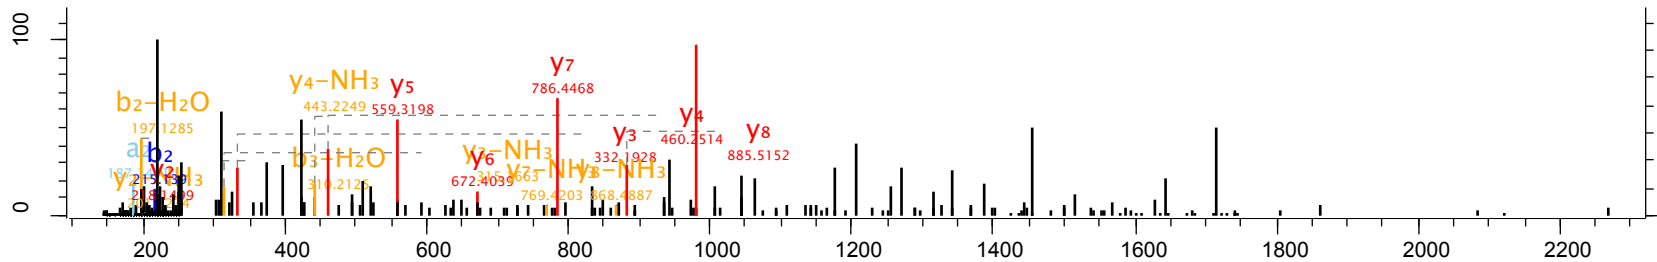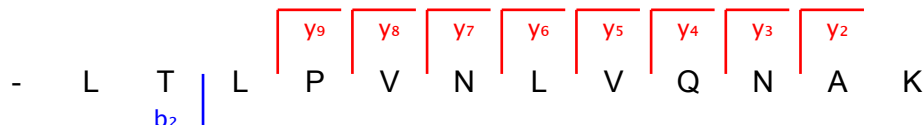

Raw file

Scan

Method

Score

m/z

Gene names

20150306\_yeast3\_Top\_opt\_2ug\_C3\_01\_1669

53127

TOF; CID

68.54

646.34

GEM1

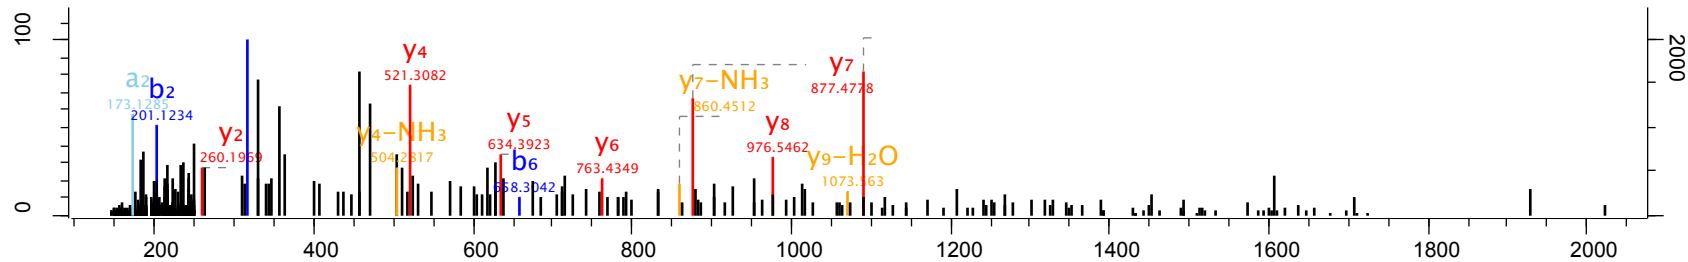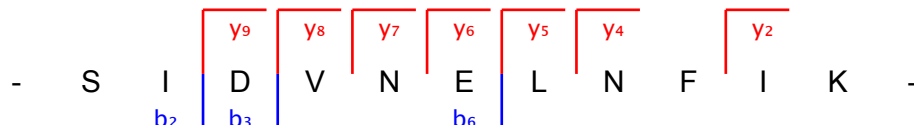



Raw file

20150306\_yeast3\_Top\_opt\_2ug\_C3\_01\_1669

Scan

55439

Method

TOF; CID

Score

50.86

m/z

1050.16

Gene names

DUR3

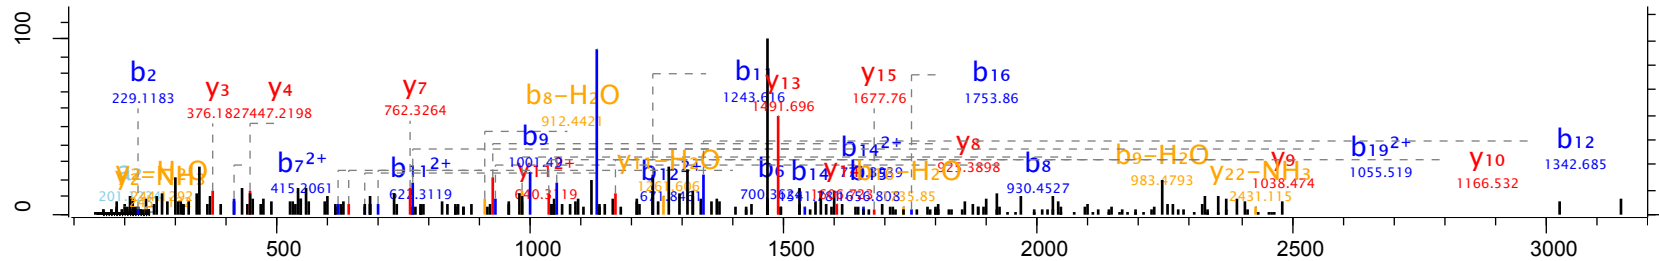

- D I T R V D E T A E L V Q A D P D I Q L Y

$b_2$  |  $b_6$  |  $b_7^{2+}$  |  $b_8$  |  $b_9$  |  $b_{10}$  |  $b_{11}$  |  $b_{12}$  |  $b_{14}$  |  $b_{15}$  |  $b_{16}$  |  $b_{19}^{2+}$

$y_{15}$  |  $y_{14}$  |  $y_{13}$  |  $y_{11}^{2+}$  |  $y_{10}$  |  $y_9$  |  $y_8$

Raw file

Scan

Method

Score

m/z

20150306\_yeast3\_Top\_opt\_2ug\_C3\_01\_1669

58481

TOF; CID

96.6

564.35

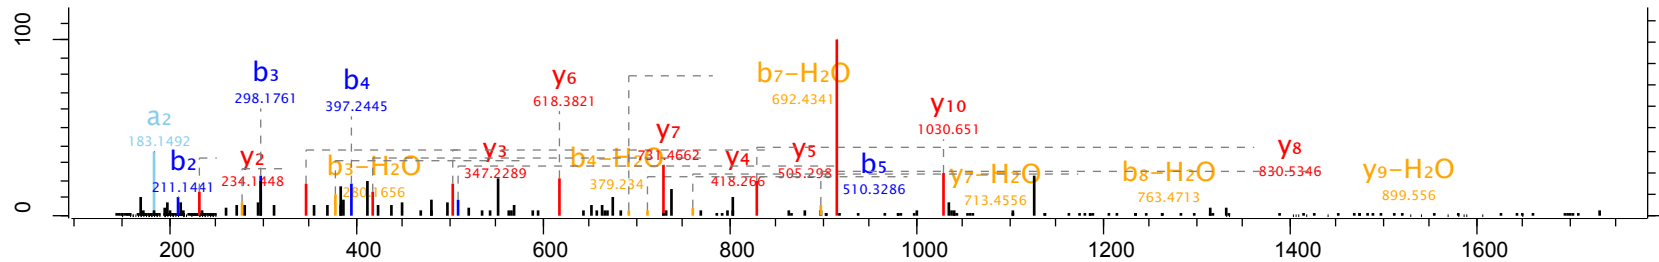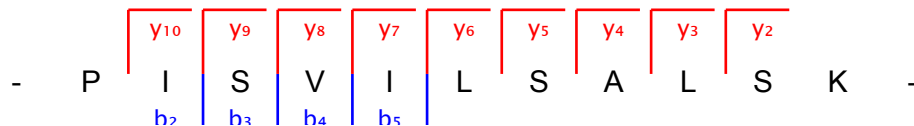

Raw file

20150306\_yeast3\_Top\_opt\_2ug\_C3\_01\_1669

Scan

59974

Method

TOF; CID

Score

106.38

m/z

637.32

Gene names

COX1

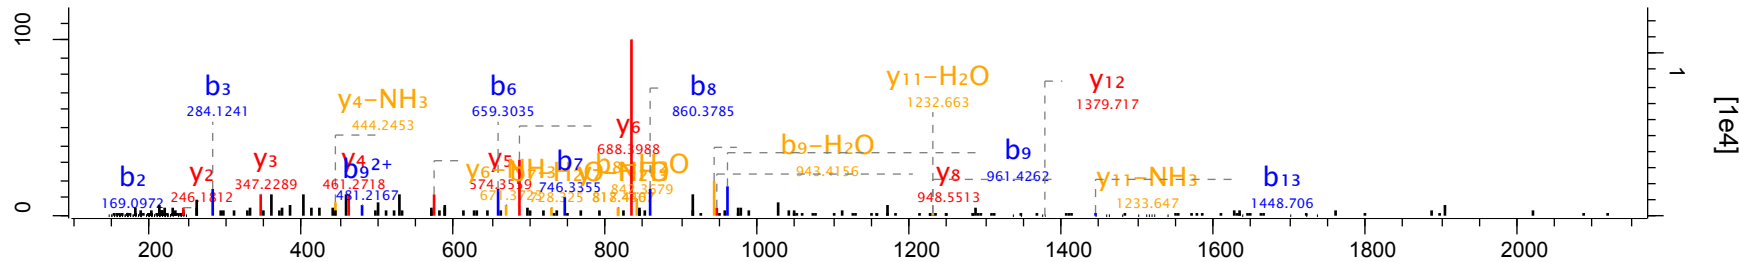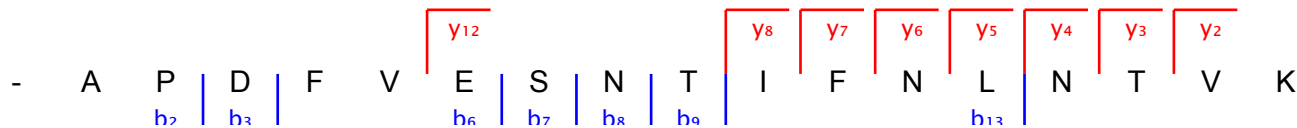

Raw file

Scan

Method

Score

m/z

Gene names

20150306\_yeast3\_Top\_opt\_2ug\_C3\_01\_1669

60819

TOF; CID

70.34

814.12

SNF11

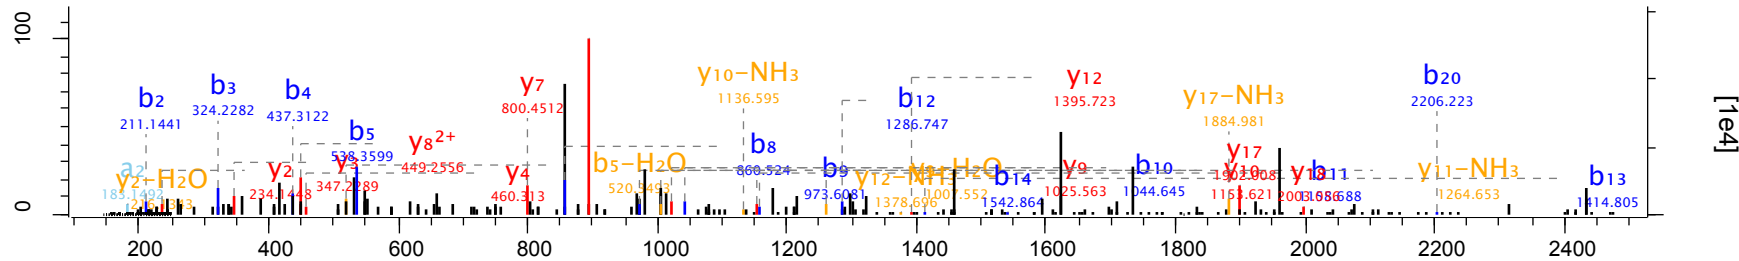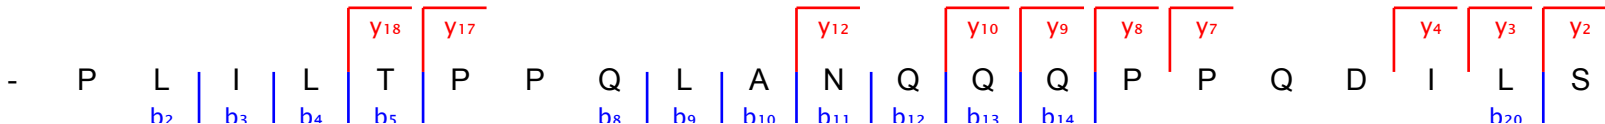

Raw file

Scan

Method

Score

m/z

Gene names

20150306\_yeast3\_Top\_opt\_2ug\_C3\_01\_1669

61585

TOF; CID

102.08

710.34

SPC25

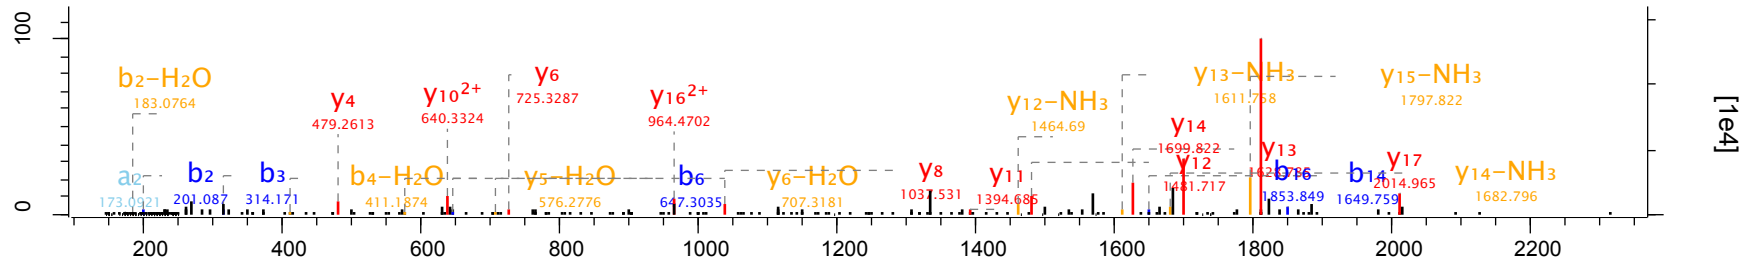

ac

A S I D A F S D L E R R M D G F Q K -

b<sub>2</sub> b<sub>3</sub> b<sub>6</sub> b<sub>14</sub> b<sub>16</sub>

y<sub>17</sub> y<sub>16</sub><sup>2+</sup> y<sub>15</sub> y<sub>14</sub> y<sub>13</sub> y<sub>12</sub> y<sub>11</sub> y<sub>10</sub><sup>2+</sup> y<sub>8</sub> y<sub>6</sub> y<sub>4</sub>

Raw file

20150306\_yeast3\_Top\_opt\_2ug\_C3\_01\_1669

Scan

63019

Method

TOF; CID

Score

124.08

m/z

811.76

Gene names

DAD4

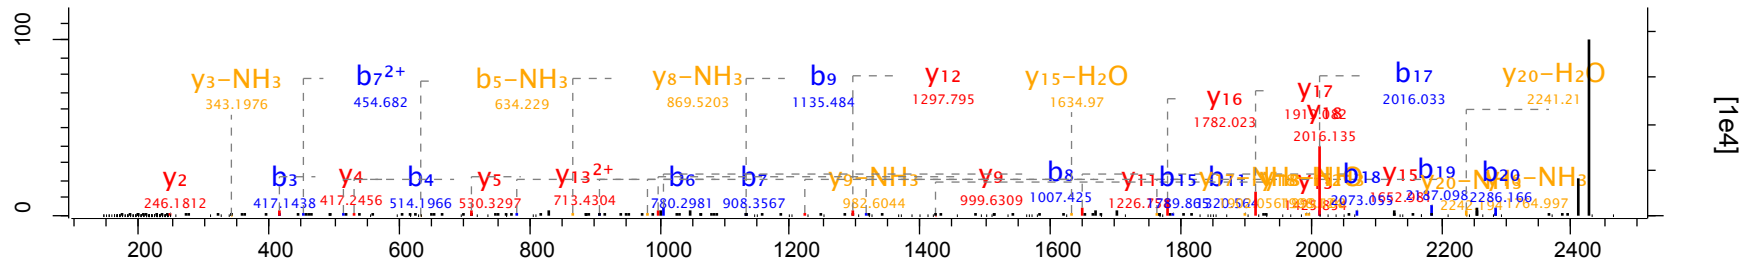

ac

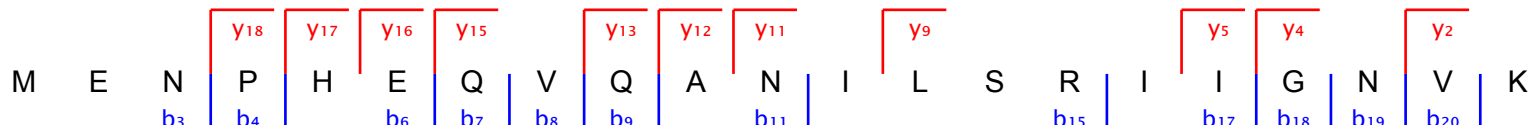

Raw file

Scan

Method

Score

m/z

Gene names

20150306\_yeast3\_Top\_opt\_2ug\_C3\_01\_1669

68127

TOF; CID

80.14

731.39

SPS100

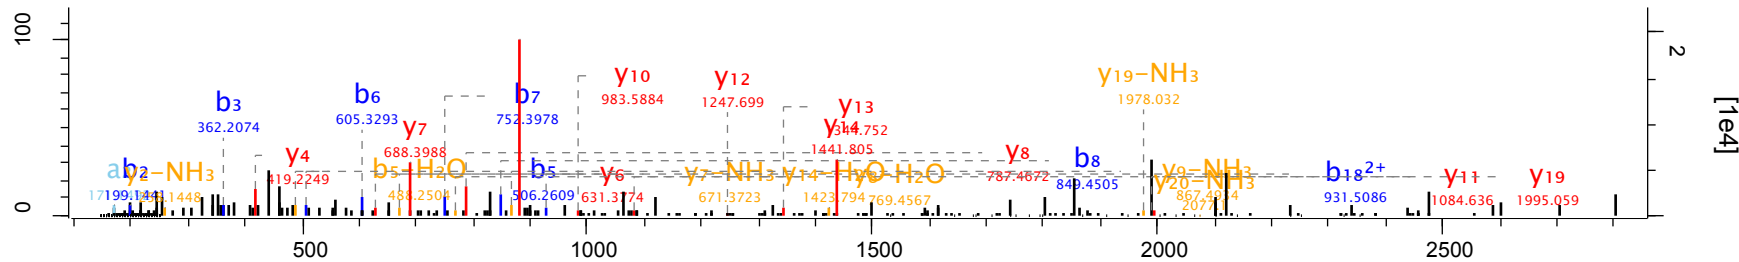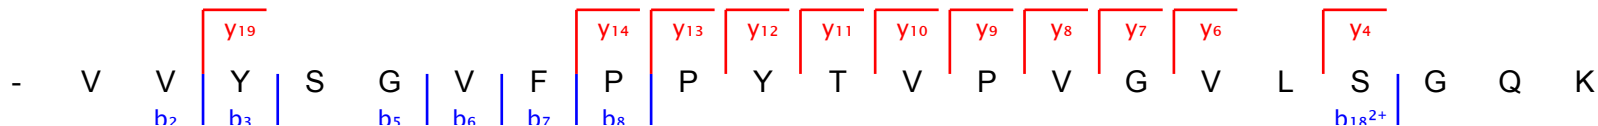

Raw file

Scan

Method

Score

m/z

Gene names

20150306\_yeast3\_Top\_opt\_2ug\_C3\_01\_1669

68496

TOF; CID

41.25

1053.52

PEX4

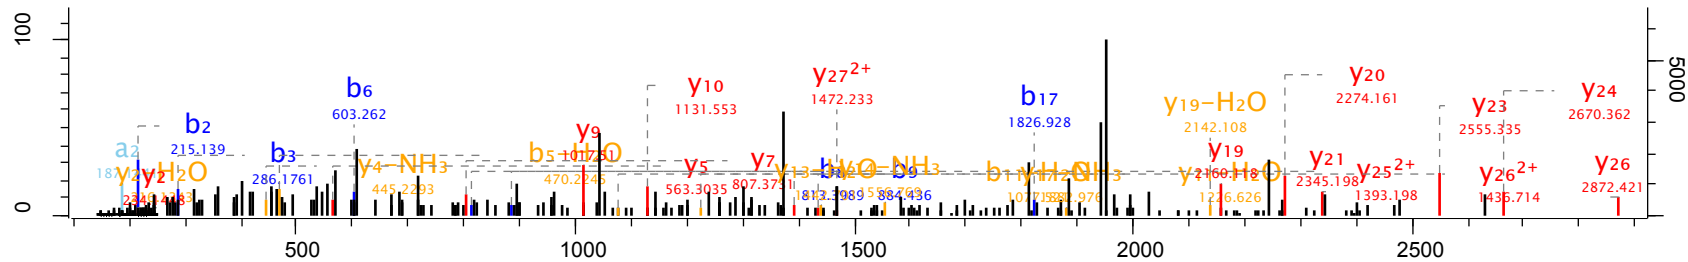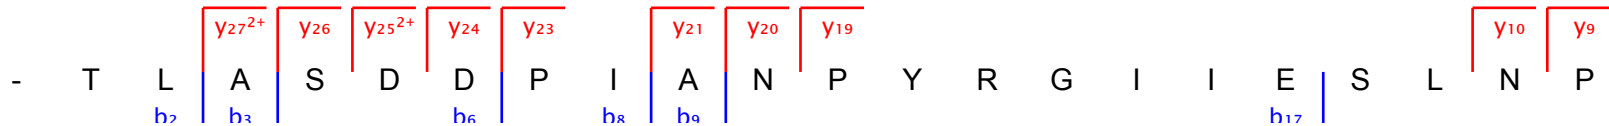



Raw file

20150306\_yeast3\_Top\_opt\_2ug\_C3\_01\_1669

Scan

71744

Method

TOF; CID

Score

142.26

m/z

729.08

Gene names

GUP1

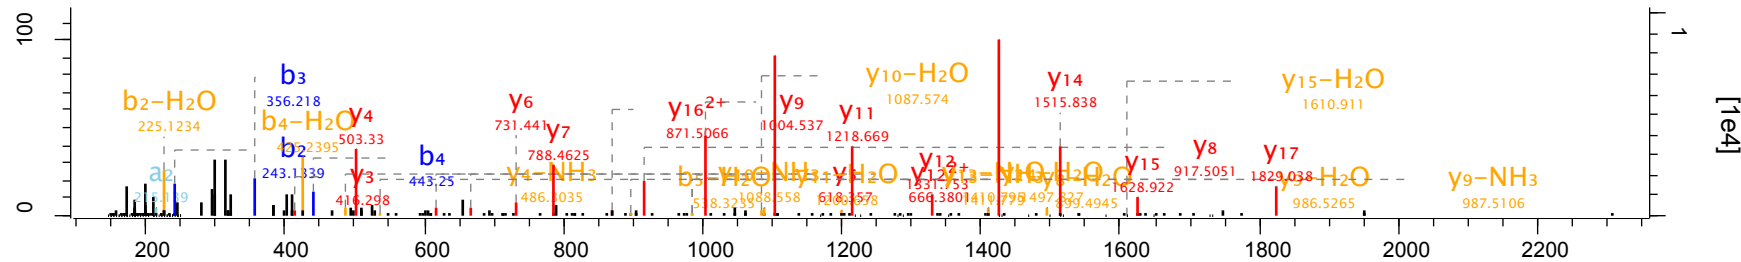

ac

- S L I S I L S P L I T S E G L D S R I K -

b<sub>2</sub> | b<sub>3</sub> | b<sub>4</sub>

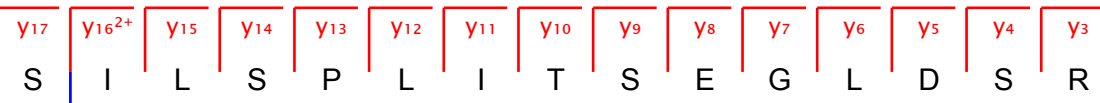



|                                                                            |            |      |        |                         |           |       |          |            |
|----------------------------------------------------------------------------|------------|------|--------|-------------------------|-----------|-------|----------|------------|
| 20150306_yeast1_Top_opt_2ug_C1_01_1663                                     | 3          | ULTI | CID OF | Unmodified              | aploid_01 | 1027  | 64.376   | 219680     |
| 352 12 477.264 428.77 0 -1 0 0 0 16                                        | 162.684    | aN   | aN     | NaN                     | 38120     | 2905  | 1011     |            |
| HLLDATDIFRK THLLDATDIFRK_ 38312 11476                                      |            |      |        |                         |           |       |          |            |
| 20150306_yeast1_Top_opt_2ug_C1_01_1663                                     | 2          | ULTI | CID OF | Unmodified              | aploid_01 | 1394  | 64.883   | 256510     |
| 376 11 645.344 288.67 0 -1 0 0 0 5                                         | 106.668    | aN   | aN     | NaN                     | 0 8466    | 2926  | 1389     |            |
| TDILTEEVEK LTDILTEEVEK_ 07540 136943                                       |            |      |        |                         |           |       |          |            |
| 20150306_yeast1_Top_opt_2ug_C1_01_1663                                     | 2          | ULTI | CID OF | Unmodified              | aploid_01 | 2729  | 66.776   | 47815 073  |
| 8 439.771 77.528 0 0 1 0 0 0 8                                             | 98.0089    | aN   | NaN    | aN                      | 0         | 39727 | 000 2721 |            |
| AYSLLAIK AYSLLAIK_ 29703 17795                                             |            |      |        |                         |           |       |          |            |
| 20150306_yeast1_Top_opt_2ug_C1_01_1663                                     | 4          | ULTI | CID OF | Unmodified              | aploid_01 | 2805  | 66.893   | 361850     |
| 774 24 644.829 575.28 0 -1 0 0 0 12                                        | 87.5109    | aN   | aN     | NaN                     | 39799     | 3004  | 2793     |            |
| LYGLQSANYDMHGSPGGLARIDK ILYGLQSANYDMHGSPGGLARIDK_ 36107 00049              |            |      |        |                         |           |       |          |            |
| 20150306_yeast1_Top_opt_2ug_C1_01_1663                                     | 2          | ULTI | CID OF | Unmodified              | aploid_01 | 2984  | 67.139   | 150660     |
| 6318 10 548.816 095.62 0 -1 0 0 0 0                                        | 11 61.3438 | aN   | aN     | NaN                     | 39968     | 014   | 42973    |            |
| DPIPDVTIK VDPIPDVTIK_ 52867 224123                                         |            |      |        |                         |           |       |          |            |
| 20150306_yeast1_Top_opt_2ug_C1_01_1663                                     | 2          | ULTI | CID OF | Unmodified              | aploid_01 | 3550  | 67.931   | 258250     |
| 856 11 666.324 330.63 0 -1 0 0 0 1                                         | 81.6249    | aN   | aN     | NaN                     | 0 0502    | 3046  | 3549     |            |
| PLEELEDMEK VPLEELEDMEK_ 38276 233559                                       |            |      |        |                         |           |       |          |            |
| 20150306_yeast1_Top_opt_2ug_C1_01_1663                                     | 3          | ULTI | CID OF | Unmodified              | aploid_01 | 4009  | 68.602   | 169880     |
| 6653 12 469.963 406.87 0 -1 0 0 0 0                                        | 10 66.2666 | aN   | aN     | NaN                     | 40936     | 071   | 43999    |            |
| IKPPLIPQNIK FIKPPLIPQNIK_ 40351 5921                                       |            |      |        |                         |           |       |          |            |
| 20150306_yeast1_Top_opt_2ug_C1_01_1663                                     | 2          | ULTI | CID OF | Unmodified              | aploid_01 | 9601  | 76.442   | 254040     |
| 113 11 604.869 207.72 0 -1 0 0 0 4                                         | 103.083    | aN   | aN     | NaN                     | 0 6217    | 3382  | 9597     |            |
| PVLQVSDLPK LPVLQVSDLPK_ 22470 132315                                       |            |      |        |                         |           |       |          |            |
| 20150306_yeast1_Top_opt_2ug_C1_01_1663                                     | 2          | ULTI | CID OF | Unmodified              | aploid_01 | 0070  | 91.668   | 445930     |
| 5753 18 916.526 831.04 0 -1 0 0 0 0                                        | 15 102.895 | aN   | aN     | NaN                     | 56105     | 963   | 60055    |            |
| GIGIAGIGTFKPELIMK SGIGIAGIGTFKPELIMK_ 32842 190481                         |            |      |        |                         |           |       |          |            |
| 20150306_yeast1_Top_opt_2ug_C1_01_1663                                     | 3          | ULTI | CID OF | Unmodified              | aploid_01 | 0574  | 92.442   | 507980     |
| 438 28 1017.49 049.45 0 -1 0 0 0 15                                        | 33.317     | aN   | aN     | NaN                     | 0 6581    | 3991  | 0559     |            |
| AEFEVTDSALYNNFNTSTTASLTPEIK SAEFEVTDSALYNNFNTSTTASLTPEIK_ 41815 85552      |            |      |        |                         |           |       |          |            |
| 20150306_yeast1_Top_opt_2ug_C1_01_1663                                     | 2          | ULTI | CID OF | Unmodified              | aploid_01 | 1595  | 93.975   | 477360     |
| 077 18 1003.53 005.04 0 0 1 0 0 0 10                                       | 103.413    | aN   | aN     | NaN                     | 0 7545    | 4048  | 1585     |            |
| GVGICATCVLRPDLDFK SGVGICATCVLRPDLDFK_ 25515 90995                          |            |      |        |                         |           |       |          |            |
| 20150306_yeast1_Top_opt_2ug_C1_01_1663                                     | 2          | ULTI | CID OF | Unmodified              | aploid_01 | 1632  | 94.035   | 164460     |
| 710 12 709.372 416.73 0 -1 0 0 0 11                                        | 52.5758    | aN   | aN     | NaN                     | 57580     | 4050  | 1621     |            |
| FISGYLNELSK FFISGYLNELSK_ 54074 4073                                       |            |      |        |                         |           |       |          |            |
| 20150306_yeast1_Top_opt_2ug_C1_01_1663                                     | 3          | ULTI | CID OF | Unmodified              | aploid_01 | 7173  | 102.86   | 257970     |
| 565 30 1188.22 561.62 0 0 1 0 0 0 8                                        | 90.907     | aN   | NaN    | aN                      | 0         | 62813 | 358 7165 |            |
| LIDDSILDDNDNTLWENPSQEQLNSSIWCK LIDDSILDDNDNTLWENPSQEQLNSSIWCK_ 04235 22754 |            |      |        |                         |           |       |          |            |
| 20150306_yeast1_Top_opt_2ug_C1_01_1663                                     | 2          | ULTI | CID OF | Unmodified              | aploid_01 | 8892  | 104.85   | 338380     |
| 2540 13 683.374 364.73 0 -1 0 0 0 0                                        | 17 94.6877 | aN   | aN     | NaN                     | 64437     | 453   | 68875    |            |
| EFLGGLDAIFGK VEFLGGLDAIFGK_ 40554 24993                                    |            |      |        |                         |           |       |          |            |
| 20150306_yeast1_Top_opt_2ug_C1_01_1663                                     | 3          | ULTI | CID OF | Unmodified              | aploid_01 | 0540  | 106.32   | 104710     |
| 431 20 765.072 292.19 0 -1 0 0 0 9                                         | 44.2378    | aN   | aN     | NaN                     | 0 5993    | 4545  | 0531     |            |
| TNRNFISVLESFLAPMVNQ ITNRNFISVLESFLAPMVNQ_ 03630 06078                      |            |      |        |                         |           |       |          |            |
| 20150306_yeast1_Top_opt_2ug_C1_01_1663                                     | 2          | ULTI | CID OF | Acetyl (Protein N-term) | aploid_01 | 0690  | 06.51    |            |
| 1188800 30170 14 836.456 670.9 0 0 -1 0 0 0 5                              | 148.52     | aN   | NaN    | aN                      | 0         | 66135 | 553      |            |
| 0675 MDVLLSLPQPELDFK (ac)MDVLLSLPQPELDFK_ 06107 142495                     |            |      |        |                         |           |       |          |            |
| 20150306_yeast1_Top_opt_2ug_C1_01_1666                                     | 3          | ULTI | CID OF | Unmodified              | aploid_02 | 540   | 14.834   | 100910     |
| 030 10 365.863 094.57 0 0 1 0 0 0 14                                       | 55.6486    | aN   | aN     | NaN                     | 0 577     | 961   | 526      | PIEAVSTNHK |
| PIEAVSTNHK_ 12050 63948                                                    |            |      |        |                         |           |       |          |            |
| 20150306_yeast1_Top_opt_2ug_C1_01_1666                                     | 3          | ULTI | CID OF | Unmodified              | aploid_02 | 1210  | 20.989   | 70058 775  |
| 11 413.221 236.64 0 0 1 0 0 0 12                                           | 51.9785    | aN   | aN     | NaN                     | 0 0043    | 1165  | 1198     |            |
| LLHSTSHDIK SLLHSTSHDIK_ 42843 194801                                       |            |      |        |                         |           |       |          |            |

|                                                          |        |           |                         |           |           |                |            |
|----------------------------------------------------------|--------|-----------|-------------------------|-----------|-----------|----------------|------------|
| 20150306_yeast1_Top_opt_2ug_C1_01_1666                   | 3 ULTI | CID OF    | Unmodified              | aploid_02 | 1887      | 22.048         | 129660     |
| 985 16 596.967 787.88 0 -1 0 0                           | 0 5    | 73.8334   | aN aN                   | NaN       | 0 0682    | 1203 1882      |            |
| ASENSSQNIVNRDNK LASENSSQNIVNRDNK_ 34218 14883            |        |           |                         |           |           |                |            |
| 20150306_yeast1_Top_opt_2ug_C1_01_1666                   | 2 ULTI | CID OF    | Unmodified              | aploid_02 | 4259      | 25.59          | 3076200    |
| 96260 7 365.229 28.444 0 -1 0 0                          | 0 0    | 1 87.7543 | aN aN                   | NaN       | 0 2922    | 1335 4258      |            |
| PVTLAK_TPVTLAK_ 3E7X9;POC0X0 16898                       |        |           |                         |           |           |                |            |
| 20150306_yeast1_Top_opt_2ug_C1_01_1666                   | 2 ULTI | CID OF    | Unmodified              | aploid_02 | 4437      | 25.867         | 130000     |
| 973 10 542.803 083.59 0 -1 0 0                           | 0 17   | 112.834   | aN aN                   | NaN       | 13091     | 1344 4420      |            |
| PTQPTVSNK IPTQPTVSNK_ 47088 02008                        |        |           |                         |           |           |                |            |
| 20150306_yeast1_Top_opt_2ug_C1_01_1666                   | 2 ULTI | CID OF    | Unmodified              | aploid_02 | 4735      | 26.305         | 131250     |
| 553 9 502.292 002.57 0 0 1 0 0                           | 0 9    | 91.8667   | aN NaN                  | aN 0 3372 | 1361      | 4726           |            |
| TVLVNTTQK TVLVNTTQK_ 06838 20746                         |        |           |                         |           |           |                |            |
| 20150306_yeast1_Top_opt_2ug_C1_01_1666                   | 3 ULTI | CID OF    | Unmodified              | aploid_02 | 6495      | 29.045         | 152400     |
| 618 14 547.952 640.83 0 -1 0 0                           | 0 5    | 87.0829   | aN aN                   | NaN       | 0 5034    | 1459 6490      |            |
| STAPQLDQCPQRK ISTAPQLDQCPQRK_ 53732 05188                |        |           |                         |           |           |                |            |
| 20150306_yeast1_Top_opt_2ug_C1_01_1666                   | 2 ULTI | CID OF    | Unmodified              | aploid_02 | 9613      | 33.761         | 135690     |
| 0851 15 856.898 711.78 0 -1 0 0                          | 0 0    | 9 194.667 | aN aN                   | NaN       | 17979     | 1632 9604      |            |
| FYAQEEREANAGK EFYAQEEREANAGK_ 02774 43092                |        |           |                         |           |           |                |            |
| 20150306_yeast1_Top_opt_2ug_C1_01_1666                   | 2 ULTI | CID OF    | Unmodified              | aploid_02 | 9922      | 34.219         | 103980     |
| 103 11 663.844 325.67 0 -1 0 0                           | 0 12   | 90.697    | aN aN                   | NaN       | 0 8271    | 1649 9910      | VWINSTENVK |
| HVWINSTENVK_ 27636 89255                                 |        |           |                         |           |           |                |            |
| 20150306_yeast1_Top_opt_2ug_C1_01_1666                   | 3 ULTI | CID OF    | Acetyl (Protein N-term) | aploid_02 | 5398      | 2.331          |            |
| 142120 205 0 9 788.698 363.07 0 0                        | -1 0   | 0 0 6     | 75.3492                 | aN NaN    | aN 0      | 23443 953 5382 |            |
| SDKPDSQVFCPNCNERLQK (ac)SDKPDSQVFCPNCNERLQK_ 3E7A8 87240 |        |           |                         |           |           |                |            |
| 20150306_yeast1_Top_opt_2ug_C1_01_1666                   | 2 ULTI | CID OF    | Unmodified              | aploid_02 | 7340      | 45.141         | 142070     |
| 610 15 812.876 623.74 0 0 1 0 0                          | 0 14   | 81.6559   | aN aN                   | NaN       | 0 5277    | 2061 7326      |            |
| LSSTSLSTDMNEDK PLSSTSLSTDMNEDK_ 04429 165946             |        |           |                         |           |           |                |            |
| 20150306_yeast1_Top_opt_2ug_C1_01_1666                   | 2 ULTI | CID OF    | Unmodified              | aploid_02 | 9042      | 47.508         | 5436500    |
| 16810 10 36.803 071.59 0 0 -1 0 0                        | 0 0    | 6 7.5317  | NaN aN                  | NaN       | 26884 156 | 29036          |            |
| LSLENGIAK QLSLENGIAK_ 38265 175064                       |        |           |                         |           |           |                |            |
| 20150306_yeast1_Top_opt_2ug_C1_01_1666                   | 3 ULTI | CID OF    | Unmodified              | aploid_02 | 3494      | 53.961         | 247670     |
| 955 21 773.363 317.07 0 -1 0 0                           | 0 12   | 35.7362   | aN aN                   | NaN       | 31089     | 2403 3482      |            |
| NSMNDNALEDNISNPVANRK ENSMNDNALEDNISNPVANRK_ 32838 2167   |        |           |                         |           |           |                |            |
| 20150306_yeast1_Top_opt_2ug_C1_01_1666                   | 2 ULTI | CID OF    | Unmodified              | aploid_02 | 3787      | 54.408         | 121800     |
| 825 8 467.271 32.528 0 0 1 0 0                           | 0 17   | 81.2963   | aN aN                   | NaN       | 0 1366    | 2419 3770      | VIGFEQK    |
| IVIGFEQK_ 32613 07160                                    |        |           |                         |           |           |                |            |
| 20150306_yeast1_Top_opt_2ug_C1_01_1666                   | 3 ULTI | CID OF    | Unmodified              | aploid_02 | 4607      | 55.534         | 235220     |
| 1788 14 535.627 603.86 0 -1 0 0                          | 0 0    | 9 97.6896 | aN aN                   | NaN       | 0 2140    | 2465 4598      |            |
| LPDSGLYNDTLRK LLPDSGLYNDTLRK_ 52923 26989                |        |           |                         |           |           |                |            |
| 20150306_yeast1_Top_opt_2ug_C1_01_1666                   | 2 ULTI | CID OF    | Unmodified              | aploid_02 | 0015      | 63.098         | 135880     |
| 738 8 488.28 74.546 0 0 1 0 0                            | 0 17   | 63.5651   | aN NaN                  | aN 0 7248 | 2765      | 9998           |            |
| LLTFPEQK LLTFPEQK_ 08118 28160                           |        |           |                         |           |           |                |            |
| 20150306_yeast1_Top_opt_2ug_C1_01_1666                   | 2 ULTI | CID OF    | Unmodified              | aploid_02 | 0948      | 64.46          | 248820     |
| 628 13 760.366 518.72 0 0 1 0 0                          | 0 14   | 50.0878   | aN NaN                  | aN 0 8129 | 2817      | 0934           |            |
| FQNPDMLANLDNK FQNPDMLANLDNK_ 32354 9191                  |        |           |                         |           |           |                |            |
| 20150306_yeast1_Top_opt_2ug_C1_01_1666                   | 2 ULTI | CID OF    | Unmodified              | aploid_02 | 3177      | 67.877         | 172840     |
| 682 9 518.795 035.58 0 0 1 0 0                           | 0 11   | 129.421   | aN aN                   | NaN       | 0 0234    | 2941 3166      | QYFAIIGK   |
| PQYFAIIGK_ 38334 67358                                   |        |           |                         |           |           |                |            |
| 20150306_yeast1_Top_opt_2ug_C1_01_1666                   | 2 ULTI | CID OF    | Unmodified              | aploid_02 | 3962      | 69.016         | 168760     |
| 803 10 551.827 101.64 0 -1 0 0                           | 0 4    | 95.6181   | aN aN                   | NaN       | 0 0975    | 2985 3958      | NSLTNLLSK  |
| LNSLTNLLSK_ 40993 30723                                  |        |           |                         |           |           |                |            |
| 20150306_yeast1_Top_opt_2ug_C1_01_1666                   | 0 EAK  | CID OF    | Unmodified              | aploid_02 | 5083      | 70.64          | 208660     |
| 853 13 767.897 aN 0 0 -1 0 0                             | 0 9    | 4.9536    | NaN aN                  | NaN       | 42034 047 | 45074          |            |
| SVENVIPYNQFK PSVENVIPYNQFK_ 34234 68369                  |        |           |                         |           |           |                |            |

20150306\_yeast1\_Top\_opt\_2ug\_C1\_01\_1666 2 ULTI CID OF Unmodified aploid\_02 8637 75.682 256800  
 904 18 1004 005.98 0 0 -1 0 0 0 7 39.276 aN NaN aN 0 45391 244 8620  
 SPLINDASTPVNQDFFNK SPLINDASTPVNQDFFNK\_ 53118 97902  
 20150306\_yeast1\_Top\_opt\_2ug\_C1\_01\_1666 2 ULTI CID OF Unmodified aploid\_02 9617 77.045 151710  
 105 10 568.329 134.64 0 -1 0 0 0 7 79.1482 aN aN NaN 0 6316 3299 9610  
 QYAPFLLGK VQYAPFLLGK\_ 02820 34479  
 20150306\_yeast1\_Top\_opt\_2ug\_C1\_01\_1666 2 ULTI CID OF Unmodified aploid\_02 3337 82.673 422880  
 1180 13 704.385 406.75 0 -1 0 0 0 0 1 74.3925 aN aN NaN 49829 3506 3336  
 FFIPQSSLGNLK GFFIPQSSLGNLK\_ 17898 4831  
 20150306\_yeast1\_Top\_opt\_2ug\_C1\_01\_1666 4 ULTI CID OF Unmodified aploid\_02 4847 84.824 1042100  
 3802 24 68.363 2669.42 0 -1 0 0 0 0 17 06.93 NaN aN NaN 51256 589 54830  
 RTDETLRLTGNPELSSLDEV LAK LRTDETLRLTGNPELSSLDEV LAK\_ 5Z2X5 34044  
 20150306\_yeast1\_Top\_opt\_2ug\_C1\_01\_1666 3 ULTI CID OF Unmodified aploid\_02 7513 88.648 4933500  
 52300 23 03.804 408.39 0 0 -1 0 0 0 1 47.354 NaN aN NaN 53773 738 57512  
 LGNVTIAQGGVLPNIHQ NLLPK LLG NVTIAQGGVLPNIHQ NLLPK\_ 04912;P04911 26215  
 20150306\_yeast1\_Top\_opt\_2ug\_C1\_01\_1666 3 ULTI CID OF Unmodified aploid\_02 9239 91.178 379230  
 260 20 782.083 343.23 0 0 1 0 0 0 17 57.4836 aN aN NaN 0 5404 3833 9222  
 LLQREFEISPELATVDLEK NLLQREFEISPELATVDLEK\_ 12498 53734  
 20150306\_yeast1\_Top\_opt\_2ug\_C1\_01\_1666 0 EAK CID OF Unmodified aploid\_02 9820 106.1 177610  
 180 0 7 729.896 aN 0 0 -1 0 0 0 14 0.8968 NaN aN NaN 65397 421 69806  
 AVGMGAGALAAAAMLL AAVGMGAGALAAAAMLL\_ 43497 336  
 20150306\_yeast1\_Top\_opt\_2ug\_C1\_01\_1668 2 ULTI CID OF Unmodified aploid\_03 721 14.899 56612 774  
 7 416.725 31.435 0 0 -1 0 0 0 0 98.9966 aN NaN aN 0 6842 77 7716 EQDISK  
 IEQDISK\_ 03193 3549  
 20150306\_yeast1\_Top\_opt\_2ug\_C1\_01\_1668 2 ULTI CID OF Unmodified aploid\_03 865 16.865 46139 001  
 0 539.756 077.5 0 0 -1 0 0 0 0 15 1.6136 aN NaN aN 0 7923 40 8850 NSMEGYHK  
 INSMEGYHK\_ 53947 01079  
 20150306\_yeast1\_Top\_opt\_2ug\_C1\_01\_1668 2 ULTI CID OF Unmodified aploid\_03 0378 19.374 41872 032  
 15 731.873 461.73 0 0 1 0 0 0 0 16 99.927 aN NaN aN 0 352 1024 0362  
 HSNANTAPPVGGNK HSNANTAPPVGGNK\_ 06170 8496  
 20150306\_yeast1\_Top\_opt\_2ug\_C1\_01\_1668 2 ULTI CID OF Unmodified aploid\_03 1018 20.398 52011 751  
 12 625.299 248.58 0 0 1 0 0 0 0 8 111.793 aN NaN aN 0 956 1060 1010  
 TSSASSPDLEK TSSASSPDLEK\_ 12359 218820  
 20150306\_yeast1\_Top\_opt\_2ug\_C1\_01\_1668 2 ULTI CID OF Unmodified aploid\_03 3685 24.552 82469 759  
 10 544.783 087.55 0 0 1 0 0 0 0 11 59.1984 aN aN NaN 0 2475 1208 3674  
 NNEALADTK INNEALADTK\_ 40050 00903  
 20150306\_yeast1\_Top\_opt\_2ug\_C1\_01\_1668 2 ULTI CID OF Unmodified aploid\_03 6047 28.232 96584 720  
 11 635.309 268.6 0 0 1 0 0 0 0 15 52.0715 aN NaN aN 0 4706 1339 6032  
 HSNVDDDLINK HSNVDDDLINK\_ 23748 88555  
 20150306\_yeast1\_Top\_opt\_2ug\_C1\_01\_1668 3 ULTI CID OF Unmodified aploid\_03 7218 29.973 147240  
 796 17 634.633 900.88 0 -1 0 0 0 0 16 80.7384 aN aN NaN 15812 1404 7202  
 SAIQENPQDDDGTRLK DSAIQENPQDDDGTRLK\_ 07963 2119  
 20150306\_yeast1\_Top\_opt\_2ug\_C1\_01\_1668 2 ULTI CID OF Unmodified aploid\_03 0171 34.388 57768 55  
 17 916.41 830.81 0 0 -1 0 0 0 0 7 151.044 aN NaN aN 0 18601 568 0154  
 LNSAYDNNSSFEGASQK LNSAYDNNSSFEGASQK\_ 53938 30669  
 20150306\_yeast1\_Top\_opt\_2ug\_C1\_01\_1668 3 ULTI CID OF Unmodified aploid\_03 1002 35.624 54055 586  
 9 376.2 125.58 0 0 -1 0 0 0 0 134.478 aN NaN aN 0 19385 615 21000 YAELAERK  
 FYAELAERK\_ 07255 72058  
 20150306\_yeast1\_Top\_opt\_2ug\_C1\_01\_1668 2 ULTI CID OF Unmodified aploid\_03 2326 37.568 140060  
 568 10 556.776 111.54 0 -1 0 0 0 0 12 64.82 aN NaN aN 0 20636 1688 22314  
 VSVTTFNCGK \_VSVTTFNCGK\_ Q08227 235917  
 20150306\_yeast1\_Top\_opt\_2ug\_C1\_01\_1668 + 2 MULTI CID TOF Unmodified haploid\_03 24645  
 41.033 1 222820 6749 0 11 628.796 1255.58 0 0 0 -1 0 0 0 0 9 68.1074  
 NaN NaN NaN 0 22826 1817 24636 GLTYQEAMESK \_GLTYQEAMESK\_ P14063 78074

|                                            |            |         |         |                                        |                          |            |         |
|--------------------------------------------|------------|---------|---------|----------------------------------------|--------------------------|------------|---------|
| 20150306_yeast1_Top_opt_2ug_C1_01_1668     | +          | 4       | MULTI   | CID TOF                                | Unmodified               | haploid_03 | 24883   |
| 41.404                                     | 1          | 213790  | 3149    | 0                                      | 23                       | 684.841    | 2735.34 |
| 0                                          | 0          | 0       | 0       | -1                                     | 0                        | 0          | 0       |
| 0                                          | 0          | 13      | 52.898  |                                        |                          |            |         |
| NaNNaNNaN0                                 | 23051      | 1830    | 24870   | RLDDQTDVEQSPLLERSNHVQEK                |                          |            |         |
| _RLDDQTDVEQSPLLERSNHVQEK_ Q07376 181802    |            |         |         |                                        |                          |            |         |
| 20150306_yeast1_Top_opt_2ug_C1_01_1668     | +          | 2       | MULTI   | CID TOF                                | Unmodified               | haploid_03 | 29201   |
| 47.546                                     | 1          | 87748   | 5050    | 0                                      | 8                        | 470.237    | 938.46  |
| 0                                          | 0          | 0       | 0       | -1                                     | 0                        | 0          | 0       |
| 0                                          | 0          | 11      | 86.7939 |                                        |                          |            |         |
| NaNNaNNaN0                                 | 27129      | 2070    | 29190   | LQFTDMGK_LQFTDMGK_ Q12328              |                          |            |         |
| 132834                                     |            |         |         |                                        |                          |            |         |
| 20150306_yeast1_Top_opt_2ug_C1_01_1668     | +          | 2       | MULTI   | CID TOF                                | Unmodified               | haploid_03 | 29235   |
| 47.588                                     | 1          | 170780  | 2646    | 0                                      | 11                       | 651.796    | 1301.58 |
| 0                                          | 0          | 0       | 0       | -1                                     | 0                        | 0          | 0       |
| 0                                          | 0          | 9       | 47.7121 |                                        |                          |            |         |
| NaNNaNNaN0                                 | 27161      | 2072    | 29226   | GSYNLEVYDDK_GSYNLEVYDDK_               |                          |            |         |
| P53198 81152                               |            |         |         |                                        |                          |            |         |
| 20150306_yeast1_Top_opt_2ug_C1_01_1668     | +          | 0       | PEAK    | CID TOF                                | Unmodified               | haploid_03 | 30483   |
| 49.358                                     | 1          | 152710  | 2725    | 0                                      | 10                       | 556.819    | NaN0    |
| 0                                          | 0          | 0       | 0       | -1                                     | 0                        | 0          | 0       |
| 0                                          | 15         | 121.36  | NaN     |                                        |                          |            |         |
| NaNNaN0                                    | 28340      | 2141    | 30468   | PVLQELTANK_PVLQELTANK_ P23059          |                          |            |         |
| 169549                                     |            |         |         |                                        |                          |            |         |
| 20150306_yeast1_Top_opt_2ug_C1_01_1668     | +          | 3       | MULTI   | CID TOF                                | Unmodified               | haploid_03 | 30500   |
| 49.386                                     | 1          | 441500  | 6692    | 0                                      | 22                       | 792.716    | 2375.13 |
| 0                                          | 0          | 0       | 0       | -1                                     | 0                        | 0          | 0       |
| 0                                          | 0          | 14      | 79.9422 |                                        |                          |            |         |
| NaNNaNNaN0                                 | 28356      | 2142    | 30486   | VQQFSSTSHVDDDEDVNSIAVAK                |                          |            |         |
| _VQQFSSTSHVDDDEDVNSIAVAK_ P25604 234326    |            |         |         |                                        |                          |            |         |
| 20150306_yeast1_Top_opt_2ug_C1_01_1668     | +          | 3       | MULTI   | CID TOF                                | Unmodified               | haploid_03 | 30642   |
| 49.591                                     | 1          | 77160   | 3147    | 0                                      | 10                       | 374.89     | 1121.65 |
| 0                                          | 0          | 0       | 0       | -1                                     | 0                        | 0          | 0       |
| 0                                          | 0          | 12      | 49.3004 |                                        |                          |            |         |
| NaNNaNNaN0                                 | 28490      | 2150    | 30630   | LTLVSPDLHK_LTLVSPDLHK_ P15807          |                          |            |         |
| 137998                                     |            |         |         |                                        |                          |            |         |
| 20150306_yeast1_Top_opt_2ug_C1_01_1668     | +          | 2       | MULTI   | CID TOF                                | Acetyl (Protein N-term)  | haploid_03 |         |
| 31556                                      | 50.941     | 1       | 360040  | 6438                                   | 0                        | 9          | 541.302 |
| 1080.59                                    | 0          | 0       | 0       | -1                                     | 0                        | 0          | 0       |
| 0                                          | 0          | 0       | 8       |                                        |                          |            |         |
| 75.509                                     | NaNNaNNaN0 | 29353   | 2201    | 31548                                  | STNILQHVK_(ac)STNILQHVK_ |            |         |
| P53983 202641                              |            |         |         |                                        |                          |            |         |
| 20150306_yeast1_Top_opt_2ug_C1_01_1668     | +          | 2       | MULTI   | CID TOF                                | Unmodified               | haploid_03 | 41551   |
| 65.122                                     | 1          | 312340  | 2246    | 0                                      | 16                       | 885.957    | 1769.9  |
| 0                                          | 0          | 0       | 0       | -1                                     | 0                        | 0          | 0       |
| 0                                          | 0          | 13      | 85.3625 |                                        |                          |            |         |
| NaNNaNNaN0                                 | 38793      | 2756    | 41538   | ISRPIASQNSLGWNEV_ISRPIASQNSLGWNEV_     |                          |            |         |
| P32334                                     |            |         |         |                                        |                          |            |         |
| 105034                                     |            |         |         |                                        |                          |            |         |
| 20150306_yeast1_Top_opt_2ug_C1_01_1668     | +          | 2       | MULTI   | CID TOF                                | Unmodified               | haploid_03 | 41940   |
| 65.697                                     | 1          | 166590  | 3206    | 0                                      | 12                       | 693.361    | 1384.71 |
| 0                                          | 0          | 0       | 0       | -1                                     | 0                        | 0          | 0       |
| 0                                          | 0          | 6       | 60.1571 |                                        |                          |            |         |
| NaNNaNNaN0                                 | 39160      | 2778    | 41934   | SLIEIDDPNIEK_SLIEIDDPNIEK_ P40851      |                          |            |         |
| 194659                                     |            |         |         |                                        |                          |            |         |
| 20150306_yeast1_Top_opt_2ug_C1_01_1668     | +          | 3       | MULTI   | CID TOF                                | Unmodified               | haploid_03 | 43693   |
| 68.242                                     | 1          | 287860  | 2766    | 0                                      | 26                       | 932.802    | 2795.38 |
| 0                                          | 0          | 0       | 0       | -1                                     | 0                        | 0          | 0       |
| 0                                          | 0          | 13      | 50.0291 |                                        |                          |            |         |
| NaNNaNNaN0                                 | 40816      | 2875    | 43680   | IVEEPVVLSHNSSIDESLDAATQNTK             |                          |            |         |
| _IVEEPVVLSHNSSIDESLDAATQNTK_ Q08119 106920 |            |         |         |                                        |                          |            |         |
| 20150306_yeast1_Top_opt_2ug_C1_01_1668     | +          | 2       | MULTI   | CID TOF                                | Unmodified               | haploid_03 | 43774   |
| 68.368                                     | 1          | 160740  | 2556    | 0                                      | 11                       | 665.858    | 1329.7  |
| 0                                          | 0          | 0       | 0       | -1                                     | 0                        | 0          | 0       |
| 0                                          | 0          | 4       | 73.9513 |                                        |                          |            |         |
| NaNNaNNaN0                                 | 40892      | 2880    | 43770   | TLQELDIEEIK_TLQELDIEEIK_ P08465        |                          |            |         |
| 214588                                     |            |         |         |                                        |                          |            |         |
| 20150306_yeast1_Top_opt_2ug_C1_01_1668     | +          | 0       | PEAK    | CID TOF                                | Unmodified               | haploid_03 | 46790   |
| 72.649                                     | 1          | 355040  | 4765    | 0                                      | 13                       | 671.882    | NaN0    |
| 0                                          | 0          | 0       | 0       | -1                                     | 0                        | 0          | 0       |
| 0                                          | 14         | 72.8801 | NaN     |                                        |                          |            |         |
| NaNNaN0                                    | 43741      | 3047    | 46776   | VLQVSGVLGDDLK_VLQVSGVLGDDLK_ P25366    |                          |            |         |
| 231224                                     |            |         |         |                                        |                          |            |         |
| 20150306_yeast1_Top_opt_2ug_C1_01_1668     | +          | 3       | MULTI   | CID TOF                                | Unmodified               | haploid_03 | 46898   |
| 72.798                                     | 1          | 326850  | 7806    | 0                                      | 25                       | 1008.82    | 3023.43 |
| 0                                          | 0          | 0       | 0       | -1                                     | 0                        | 0          | 0       |
| 0                                          | 0          | 14      | 76.7993 |                                        |                          |            |         |
| NaNNaNNaN0                                 | 43843      | 3053    | 46884   | GQTEEEYTQQLQHYFEVEQGPVRTK              |                          |            |         |
| _GQTEEEYTQQLQHYFEVEQGPVRTK_ Q02872 79748   |            |         |         |                                        |                          |            |         |
| 20150306_yeast1_Top_opt_2ug_C1_01_1668     | +          | 2       | MULTI   | CID TOF                                | Unmodified               | haploid_03 | 47274   |
| 73.301                                     | 1          | 210930  | 1681    | 0                                      | 12                       | 729.37     | 1456.73 |
| 0                                          | 0          | 0       | 0       | -1                                     | 0                        | 0          | 0       |
| 0                                          | 0          | 12      | 73.2733 |                                        |                          |            |         |
| NaNNaNNaN0                                 | 44198      | 3074    | 47262   | NQNLWQEVDLAK_NQNLWQEVDLAK_ P47051      |                          |            |         |
| 156952                                     |            |         |         |                                        |                          |            |         |
| 20150306_yeast1_Top_opt_2ug_C1_01_1668     | +          | 2       | MULTI   | CID TOF                                | Acetyl (Protein N-term)  | haploid_03 |         |
| 48441                                      | 75.102     | 1       | 306660  | 6800                                   | 0                        | 21         | 1175.58 |
| 2349.14                                    | 0          | 0       | 0       | -1                                     | 0                        | 0          | 0       |
| 0                                          | 0          | 0       | 9       |                                        |                          |            |         |
| 145.441                                    | NaNNaNNaN0 | 45300   | 3139    | 48432                                  | SSNEEVFTQINATANVVDNKK    |            |         |
| _(ac)SSNEEVFTQINATANVVDNKK_ Q12431 200882  |            |         |         |                                        |                          |            |         |
| 20150306_yeast1_Top_opt_2ug_C1_01_1668     | +          | 3       | MULTI   | CID TOF                                | Unmodified               | haploid_03 | 51336   |
| 79.338                                     | 1          | 529080  | 9671    | 0                                      | 18                       | 686.682    | 2057.02 |
| 0                                          | 0          | 0       | 0       | -1                                     | 0                        | 0          | 0       |
| 0                                          | 0          | 6       | 55.4367 |                                        |                          |            |         |
| NaNNaNNaN0                                 | 48034      | 3300    | 51330   | FLTQEAGLVDSWEQLHGK FLTQEAGLVDSWEQLHGK_ |                          |            |         |



## Q2V2P8 117682

|                                        |        |            |        |                                 |            |                                              |
|----------------------------------------|--------|------------|--------|---------------------------------|------------|----------------------------------------------|
| 20150306_yeast1_Top_opt_2ug_C1_01_1670 | +      | 3          | MULTI  | CID TOF Unmodified              | haploid_04 | 26807                                        |
| 44.307                                 | 1      | 172980     | 8128   | 0                               | 17         | 610.627 1828.86 0 0 0 -1 0 0 0 0 8 189.809   |
| NaNNaNNaN0                             |        | 24787      | 2018   | 26799                           |            | PALDEAREEAPFENGGK _PALDEAREEAPFENGGK_        |
| O60200                                 |        | 160923     |        |                                 |            |                                              |
| 20150306_yeast1_Top_opt_2ug_C1_01_1670 | +      | 2          | MULTI  | CID TOF Unmodified              | haploid_04 | 29171                                        |
| 47.782                                 | 1      | 177740     | 4091   | 0                               | 11         | 589.822 1177.63 0 0 0 -1 0 0 0 0 14 52.3906  |
| NaNNaNNaN0                             |        | 27020      | 2149   | 29157                           |            | ALFVTTSNTPK _ALFVTTSNTPK_ Q99252 8366        |
| 20150306_yeast1_Top_opt_2ug_C1_01_1670 | +      | 3          | MULTI  | CID TOF Unmodified              | haploid_04 | 29172                                        |
| 47.784                                 | 1      | 247140     | 7083   | 0                               | 16         | 572.969 1715.89 0 0 0 -1 0 0 0 0 15 69.1882  |
| NaNNaNNaN0                             |        | 27021      | 2149   | 29157                           |            | LHTNLSQEYIGVSAGK _LHTNLSQEYIGVSAGK_ P38114   |
| 122563                                 |        |            |        |                                 |            |                                              |
| 20150306_yeast1_Top_opt_2ug_C1_01_1670 | +      | 2          | MULTI  | CID TOF Unmodified              | haploid_04 | 29190                                        |
| 47.815                                 | 1      | 180040     | 5103   | 0                               | 11         | 593.836 1185.66 0 0 0 -1 0 0 0 0 15 71.0845  |
| NaNNaNNaN0                             |        | 27038      | 2150   | 29175                           |            | LLTPITASNEK _LLTPITASNEK_ P18412 128279      |
| 20150306_yeast1_Top_opt_2ug_C1_01_1670 | +      | 2          | MULTI  | CID TOF Unmodified              | haploid_04 | 33331                                        |
| 53.699                                 | 1      | 344060     | 41412  | 0                               | 8          | 436.284 870.553 0 0 0 -1 0 0 0 0 16 68.2141  |
| NaNNaNNaN0                             |        | 30949      | 2380   | 33315                           |            | VLSLALQK _VLSLALQK_ Q05779 231373            |
| 20150306_yeast1_Top_opt_2ug_C1_01_1670 | +      | 2          | MULTI  | CID TOF Unmodified              | haploid_04 | 36251                                        |
| 57.94                                  | 1      | 204070     | 10319  | 0                               | 9          | 548.769 1095.52 0 0 0 -1 0 0 0 0 2 107.205   |
| NaNNaNNaN0                             |        | 33706      | 2543   | 36249                           |            | YGSWEVLDK _YGSWEVLDK_ P53066 245367          |
| 20150306_yeast1_Top_opt_2ug_C1_01_1670 | +      | 2          | MULTI  | CID TOF Unmodified              | haploid_04 | 37795                                        |
| 60.03                                  | 1      | 290380     | 5075   | 0                               | 9          | 575.287 1148.56 0 0 0 -1 0 0 0 0 16 63.1842  |
| NaNNaNNaN0                             |        | 35165      | 2628   | 37779                           |            | IWLQEMDSK _IWLQEMDSK_ Q03823 108163          |
| 20150306_yeast1_Top_opt_2ug_C1_01_1670 | +      | 3          | MULTI  | CID TOF Unmodified              | haploid_04 | 39299                                        |
| 62.142                                 | 1      | 503920     | 12233  | 0                               | 15         | 610.291 1827.85 0 0 0 -1 0 0 0 0 8 60.5499   |
| NaNNaNNaN0                             |        | 36585      | 2712   | 39291                           |            | VLPFHTIYCYNCGGK _VLPFHTIYCYNCGGK_ Q12476     |
| 231010                                 |        |            |        |                                 |            |                                              |
| 20150306_yeast1_Top_opt_2ug_C1_01_1670 | +      | 3          | MULTI  | CID TOF Unmodified              | haploid_04 | 39982                                        |
| 63.105                                 | 1      | 59576      | 2773   | 0                               | 10         | 400.558 1198.65 0 0 0 -1 0 0 0 0 7 94.6921   |
| NaNNaNNaN0                             |        | 37230      | 2750   | 39975                           |            | TVHFWAPTLK _TVHFWAPTLK_ P38857;P53311 220472 |
| 20150306_yeast1_Top_opt_2ug_C1_01_1670 | +      | 2          | MULTI  | CID TOF Acetyl (Protein N-term) | haploid_04 |                                              |
| 40244                                  | 63.475 | 1          | 599980 | 48281                           | 0          | 17 985.484 1968.95 0 0 0 -1 0 0 0 0 17       |
| 190.958                                |        | NaNNaNNaN0 | 37478  | 2764                            | 40227      | ATRTQFENSNEIGVFSK                            |
| _(ac)ATRTQFENSNEIGVFSK_                |        |            |        |                                 |            | Q12522 15024                                 |
| 20150306_yeast1_Top_opt_2ug_C1_01_1670 | +      | 2          | MULTI  | CID TOF Unmodified              | haploid_04 | 40889                                        |
| 64.478                                 | 1      | 276300     | 3921   | 0                               | 15         | 857.4 1712.79 0 0 0 -1 0 0 0 0 14 43.5923    |
| NaNNaNNaN0                             |        | 38087      | 2800   | 40875                           |            | ENDVVESGQELGYFK _ENDVVESGQELGYFK_ P53037     |
| 51112                                  |        |            |        |                                 |            |                                              |
| 20150306_yeast1_Top_opt_2ug_C1_01_1670 | +      | 2          | MULTI  | CID TOF Unmodified              | haploid_04 | 42627                                        |
| 67.115                                 | 1      | 239980     | 5667   | 0                               | 12         | 658.851 1315.69 0 0 0 -1 0 0 0 0 6 52.0715   |
| NaNNaNNaN0                             |        | 39728      | 2897   | 42621                           |            | SLPMYPAAPLEK _SLPMYPAAPLEK_ P16892 195166    |
| 20150306_yeast1_Top_opt_2ug_C1_01_1670 | +      | 2          | MULTI  | CID TOF Unmodified              | haploid_04 | 42859                                        |
| 67.478                                 | 1      | 253820     | 2249   | 0                               | 15         | 736.897 1471.78 0 0 0 -1 0 0 0 0 4 50.0775   |
| NaNNaNNaN0                             |        | 39947      | 2910   | 42855                           |            | TAAGALLDTAVNVEK _TAAGALLDTAVNVEK_ P34239     |
| 205489                                 |        |            |        |                                 |            |                                              |
| 20150306_yeast1_Top_opt_2ug_C1_01_1670 | +      | 2          | MULTI  | CID TOF Unmodified              | haploid_04 | 43302                                        |
| 68.14                                  | 1      | 198460     | 2002   | 0                               | 11         | 626.839 1251.66 0 0 0 -1 0 0 0 0 15 92.5385  |
| NaNNaNNaN0                             |        | 40366      | 2934   | 43287                           |            | GFVNAINLYNK _GFVNAINLYNK_ Q04089 75331       |
| 20150306_yeast1_Top_opt_2ug_C1_01_1670 | +      | 3          | MULTI  | CID TOF Unmodified              | haploid_04 | 44790                                        |
| 70.167                                 | 1      | 228330     | 1714   | 0                               | 22         | 851.095 2550.26 0 0 0 -1 0 0 0 0 9 107.747   |
| NaNNaNNaN0                             |        | 41771      | 3017   | 44781                           |            | LSDNYNTQILSNTEHPLLTSYK                       |
| _LSDNYNTQILSNTEHPLLTSYK_               |        |            |        |                                 |            | P48743 134511                                |
| 20150306_yeast1_Top_opt_2ug_C1_01_1670 | +      | 3          | MULTI  | CID TOF Unmodified              | haploid_04 | 45312                                        |







\_RYSSLFSVDSTTPNSSSETVELSEENK\_P36531 185311  
20150306\_yeast3\_Top\_opt\_2ug\_C3\_01\_1664 + 3 MULTI CID TOF Unmodified diploid\_01 42797  
65.637 1 240290 3850 0 14 528.284 1581.83 0 0 0 -1 0 0 0 0 17 39.4267  
NaNNaNNaN0 39898 2897 42780 SLESHIAQLETNLK \_SLESHIAQLETNLK\_P47988 194218  
20150306\_yeast3\_Top\_opt\_2ug\_C3\_01\_1664 + 3 MULTI CID TOF Unmodified diploid\_01 43067  
66.012 1 642370 27793 0 13 516.949 1547.82 0 0 0 -1 0 0 0 0 17 109.145  
NaNNaNNaN0 40153 2912 43050 EIMSTESLELLRK \_EIMSTESLELLRK\_P39008 46207  
20150306\_yeast3\_Top\_opt\_2ug\_C3\_01\_1664 + 4 MULTI CID TOF Unmodified diploid\_01 48107  
73.041 1 512920 2744 0 23 694.563 2774.22 0 0 0 -1 0 0 0 0 17 62.0054  
NaNNaNNaN0 44913 3192 48090 EMEVDPSNMNFQELANHFDRHSK  
\_EMEVDPSNMNFQELANHFDRHSK\_P19956 50591  
20150306\_yeast3\_Top\_opt\_2ug\_C3\_01\_1664 + 0 PEAK CID TOF Unmodified diploid\_01 48644  
73.777 1 93851 3212 0 13 511.287 NaN0 0 0 -1 0 0 0 0 14 159.576 NaN  
NaNNaN0 45420 3222 48630 PVNSEVFTELLRK \_PVNSEVFTELLRK\_P47167 169640  
20150306\_yeast3\_Top\_opt\_2ug\_C3\_01\_1664 + 2 MULTI CID TOF Unmodified diploid\_01 66358  
100.01 1 347020 3814 0 21 1173.11 2344.2 0 0 0 -1 0 0 0 0 16 83.2506  
NaNNaNNaN0 62150 4206 66342 LTTLDTGDLSPIDEEQPILK \_LTTLDTGDLSPIDEEQPILK\_Q12301 138440  
20150306\_yeast3\_Top\_opt\_2ug\_C3\_01\_1664 + 2 MULTI CID TOF Unmodified diploid\_01 68059  
102.63 1 265550 3150 0 13 761.891 1521.77 0 0 0 -1 0 0 0 0 7 52.4955  
NaNNaNNaN0 63756 4301 68052 SILELVNEDYQSI \_SILELVNEDYQSI\_P28778 192613  
20150306\_yeast3\_Top\_opt\_2ug\_C3\_01\_1664 + 2 MULTI CID TOF Unmodified diploid\_01 70746  
105.59 1 142800 7530 0 12 689.944 1377.87 0 0 0 -1 0 0 0 0 12 87.1843  
NaNNaNNaN0 66294 4450 70734 LLNWVLLPLLGK \_LLNWVLLPLLGK\_Q3E798 126944  
20150306\_yeast3\_Top\_opt\_2ug\_C3\_01\_1664 + 3 MULTI CID TOF Unmodified diploid\_01 72557  
107.91 1 291120 6265 0 25 869.815 2606.42 0 0 0 -1 0 0 0 0 5 125.311  
NaNNaNNaN0 68004 4551 72552 AAIYLTAVLEYLTAEVLELAGNAAK  
\_AAIYLTAVLEYLTAEVLELAGNAAK\_Q12692 766  
20150306\_yeast3\_Top\_opt\_2ug\_C3\_01\_1665 + 2 MULTI CID TOF Unmodified diploid\_02 6370  
12.468 1 54872 1918 0 7 424.685 847.356 0 0 0 -1 0 0 0 0 3 79.8094  
NaNNaNNaN0 5585 783 6367 DNDELDK \_DNDELDK\_Q03880 29665  
20150306\_yeast3\_Top\_opt\_2ug\_C3\_01\_1665 + 2 MULTI CID TOF Unmodified diploid\_02 8992  
16.912 1 562160 49607 0 13 660.271 1318.53 0 0 0 -1 0 0 0 0 15 100.072  
NaNNaNNaN0 8062 928 8977 ARIAAGDGDDDDDE \_ARIAAGDGDDDDDE\_P22289 12843  
20150306\_yeast3\_Top\_opt\_2ug\_C3\_01\_1665 + 2 MULTI CID TOF Unmodified diploid\_02 9144  
17.164 1 78180 4117 0 11 590.289 1178.56 0 0 0 -1 0 0 0 0 5 64.8267  
NaNNaNNaN0 8205 937 9139 RDGGFQDGTVK \_RDGGFQDGTVK\_P46955 179287  
20150306\_yeast3\_Top\_opt\_2ug\_C3\_01\_1665 + 3 MULTI CID TOF Unmodified diploid\_02 9275  
17.378 1 51702 1775 0 18 706.995 2117.96 0 0 0 -1 0 0 0 0 10 76.8261  
NaNNaNNaN0 8329 944 9265 ELEHENTVQEHEQNTGPK \_ELEHENTVQEHEQNTGPK\_P25038  
47886  
20150306\_yeast3\_Top\_opt\_2ug\_C3\_01\_1665 + 2 MULTI CID TOF Unmodified diploid\_02 13616  
24.155 1 118790 3720 0 11 664.804 1327.59 0 0 0 -1 0 0 0 0 13 90.7928  
NaNNaNNaN0 12429 1185 13603 DENISHEDEIK \_DENISHEDEIK\_Q08649 22237  
20150306\_yeast3\_Top\_opt\_2ug\_C3\_01\_1665 + 2 MULTI CID TOF Unmodified diploid\_02 17648  
30.122 1 150890 6612 0 9 524.769 1047.52 0 0 0 -1 0 0 0 0 13 66.5676  
NaNNaNNaN0 16237 1409 17635 LVDDYAQPK \_LVDDYAQPK\_P23797 138757  
20150306\_yeast3\_Top\_opt\_2ug\_C3\_01\_1665 + 3 MULTI CID TOF Unmodified diploid\_02 18151  
30.821 1 220420 7931 0 15 554.925 1661.75 0 0 0 -1 0 0 0 0 12 91.3551  
NaNNaNNaN0 16712 1437 18139 IDGQSAYHIDSAAEEK \_IDGQSAYHIDSAAEEK\_P53892  
91819  
20150306\_yeast3\_Top\_opt\_2ug\_C3\_01\_1665 + 3 MULTI CID TOF Unmodified diploid\_02 20370  
34.243 1 106660 2402 0 23 808.032 2421.08 0 0 0 -1 0 0 0 0 17 44.7397  
NaNNaNNaN0 18808 1560 20353 SGSSQIGESHVDTVECSNNLSK

|                                                                                                                    |         |                        |        |       |       |         |                                |                            |        |        |    |    |   |   |    |         |
|--------------------------------------------------------------------------------------------------------------------|---------|------------------------|--------|-------|-------|---------|--------------------------------|----------------------------|--------|--------|----|----|---|---|----|---------|
| <u>_SGSSQIGESHVDTVECSNLSK_ P47041</u> 190844                                                                       |         |                        |        |       |       |         |                                |                            |        |        |    |    |   |   |    |         |
| 20150306_                                                                                                          | yeast3_ | Top_opt_2ug_C3_01_1665 | +      | 3     | MULTI | CID TOF | Unmodified                     | diploid_02                 | 21394  |        |    |    |   |   |    |         |
| 35.793                                                                                                             | 1       | 283080                 | 13322  | 0     | 12    | 499.917 | 1496.73                        | 0                          | 0      | 0      | -1 | 0  | 0 | 0 | 15 | 40.4755 |
| NaN                                                                                                                | NaN     | NaN                    | 0      | 19775 | 1617  | 21379   | DDQVRSNPYIYK_                  | DDQVRSNPYIYK_              | Q07350 | 21288  |    |    |   |   |    |         |
| <u>20150306_</u> <u>yeast3_</u> <u>Top_opt_2ug_C3_01_1665</u> + 3 MULTI CID TOF Acetyl (Protein N-term) diploid_02 |         |                        |        |       |       |         |                                |                            |        |        |    |    |   |   |    |         |
| 23230                                                                                                              | 38.504  | 1                      | 178590 | 3445  | 0     | 20      | 762.682                        | 2285.02                    | 0      | 0      | 0  | -1 | 0 | 0 | 0  | 15      |
| 50.2365                                                                                                            | NaN     | NaN                    | NaN    | 0     | 21509 | 1719    | 23215                          | MESTSGERSENIHEDQGIPK       |        |        |    |    |   |   |    |         |
| <u>_(ac)MESTSGERSENIHEDQGIPK_ P20052</u> 143005                                                                    |         |                        |        |       |       |         |                                |                            |        |        |    |    |   |   |    |         |
| <u>20150306_</u> <u>yeast3_</u> <u>Top_opt_2ug_C3_01_1665</u> + 2 MULTI CID TOF Unmodified diploid_02 25380        |         |                        |        |       |       |         |                                |                            |        |        |    |    |   |   |    |         |
| 41.642                                                                                                             | 1       | 143040                 | 1461   | 0     | 13    | 669.316 | 1336.62                        | 0                          | 0      | 0      | -1 | 0  | 0 | 0 | 5  | 68.9722 |
| NaN                                                                                                                | NaN     | NaN                    | 0      | 23539 | 1839  | 25375   | LSAMVDDSAVDSK_                 | LSAMVDDSAVDSK_             | P32328 | 134228 |    |    |   |   |    |         |
| <u>20150306_</u> <u>yeast3_</u> <u>Top_opt_2ug_C3_01_1665</u> + 2 MULTI CID TOF Unmodified diploid_02 30355        |         |                        |        |       |       |         |                                |                            |        |        |    |    |   |   |    |         |
| 48.66                                                                                                              | 1       | 192650                 | 4602   | 0     | 15    | 910.902 | 1819.79                        | 0                          | 0      | 0      | -1 | 0  | 0 | 0 | 12 | 95.0671 |
| NaN                                                                                                                | NaN     | NaN                    | 0      | 28238 | 2115  | 30343   | FYDPDQPNNDPIDPEEK_             | FYDPDQPNNDPIDPEEK_         | P22543 |        |    |    |   |   |    |         |
| 72105                                                                                                              |         |                        |        |       |       |         |                                |                            |        |        |    |    |   |   |    |         |
| <u>20150306_</u> <u>yeast3_</u> <u>Top_opt_2ug_C3_01_1665</u> + 2 MULTI CID TOF Unmodified diploid_02 32505        |         |                        |        |       |       |         |                                |                            |        |        |    |    |   |   |    |         |
| 51.774                                                                                                             | 1       | 245350                 | 6966   | 0     | 10    | 596.814 | 1191.61                        | 0                          | 0      | 0      | -1 | 0  | 0 | 0 | 2  | 148.28  |
| NaN                                                                                                                | NaN     | NaN                    | 0      | 30268 | 2235  | 32503   | VNEYVNVDLK_                    | VNEYVNVDLK_                | P25358 | 232332 |    |    |   |   |    |         |
| <u>20150306_</u> <u>yeast3_</u> <u>Top_opt_2ug_C3_01_1665</u> + 3 MULTI CID TOF Unmodified diploid_02 33445        |         |                        |        |       |       |         |                                |                            |        |        |    |    |   |   |    |         |
| 53.114                                                                                                             | 1       | 646590                 | 20741  | 0     | 17    | 687.653 | 2059.94                        | 0                          | 0      | 0      | -1 | 0  | 0 | 0 | 6  | 52.5197 |
| NaN                                                                                                                | NaN     | NaN                    | 0      | 31156 | 2287  | 33439   | EVQEDEDPDVWDTRISK_             | EVQEDEDPDVWDTRISK_         | Q05809 | 58963  |    |    |   |   |    |         |
| <u>20150306_</u> <u>yeast3_</u> <u>Top_opt_2ug_C3_01_1665</u> + 3 MULTI CID TOF Unmodified diploid_02 33989        |         |                        |        |       |       |         |                                |                            |        |        |    |    |   |   |    |         |
| 53.851                                                                                                             | 1       | 248910                 | 11783  | 0     | 22    | 838.38  | 2512.12                        | 0                          | 0      | 0      | -1 | 0  | 0 | 0 | 10 | 119.412 |
| NaN                                                                                                                | NaN     | NaN                    | 0      | 31670 | 2317  | 33979   | RDQQDAGHSDISDLQYSSFTK          |                            |        |        |    |    |   |   |    |         |
| <u>_RDQQDAGHSDISDLQYSSFTK_ P43601</u> 179425                                                                       |         |                        |        |       |       |         |                                |                            |        |        |    |    |   |   |    |         |
| <u>20150306_</u> <u>yeast3_</u> <u>Top_opt_2ug_C3_01_1665</u> + 3 MULTI CID TOF Unmodified diploid_02 37107        |         |                        |        |       |       |         |                                |                            |        |        |    |    |   |   |    |         |
| 58.269                                                                                                             | 1       | 280800                 | 2783   | 0     | 16    | 577.627 | 1729.86                        | 0                          | 0      | 0      | -1 | 0  | 0 | 0 | 14 | 88.9514 |
| NaN                                                                                                                | NaN     | NaN                    | 0      | 34615 | 2490  | 37093   | EFGTHVVSADDEVLAEK_             | EFGTHVVSADDEVLAEK_         | P38204 |        |    |    |   |   |    |         |
| 42344                                                                                                              |         |                        |        |       |       |         |                                |                            |        |        |    |    |   |   |    |         |
| <u>20150306_</u> <u>yeast3_</u> <u>Top_opt_2ug_C3_01_1665</u> + 5 MULTI CID TOF Unmodified diploid_02 38349        |         |                        |        |       |       |         |                                |                            |        |        |    |    |   |   |    |         |
| 59.985                                                                                                             | 1       | 547800                 | 5722   | 0     | 30    | 685.966 | 3424.79                        | 0                          | 0      | 0      | -1 | 0  | 0 | 0 | 14 | 46.2517 |
| NaN                                                                                                                | NaN     | NaN                    | 0      | 35788 | 2559  | 38335   | LEEESSTIPTTTTPHPDLLQIQRHGELLRK |                            |        |        |    |    |   |   |    |         |
| <u>_LEEESSTIPTTTTPHPDLLQIQRHGELLRK_ P52868</u> 118085                                                              |         |                        |        |       |       |         |                                |                            |        |        |    |    |   |   |    |         |
| <u>20150306_</u> <u>yeast3_</u> <u>Top_opt_2ug_C3_01_1665</u> + 3 MULTI CID TOF Unmodified diploid_02 38545        |         |                        |        |       |       |         |                                |                            |        |        |    |    |   |   |    |         |
| 60.232                                                                                                             | 1       | 49372                  | 1445   | 0     | 9     | 408.23  | 1221.67                        | 0                          | 0      | 0      | -1 | 0  | 0 | 0 | 12 | 62.4631 |
| NaN                                                                                                                | NaN     | NaN                    | 0      | 35973 | 2570  | 38533   | ILWHELPHK_                     | ILWHELPHK_                 | P38352 | 99984  |    |    |   |   |    |         |
| <u>20150306_</u> <u>yeast3_</u> <u>Top_opt_2ug_C3_01_1665</u> + 2 MULTI CID TOF Unmodified diploid_02 39180        |         |                        |        |       |       |         |                                |                            |        |        |    |    |   |   |    |         |
| 61.102                                                                                                             | 1       | 178920                 | 1685   | 0     | 21    | 1071.5  | 2140.98                        | 0                          | 0      | 0      | -1 | 0  | 0 | 0 | 17 | 66.4672 |
| NaN                                                                                                                | NaN     | NaN                    | 0      | 36573 | 2605  | 39163   | GSGVYSLLNQEDSSTSSADPK          |                            |        |        |    |    |   |   |    |         |
| <u>_GSGVYSLLNQEDSSTSSADPK_ P20134</u> 80491                                                                        |         |                        |        |       |       |         |                                |                            |        |        |    |    |   |   |    |         |
| <u>20150306_</u> <u>yeast3_</u> <u>Top_opt_2ug_C3_01_1665</u> + 2 MULTI CID TOF Unmodified diploid_02 39303        |         |                        |        |       |       |         |                                |                            |        |        |    |    |   |   |    |         |
| 61.287                                                                                                             | 1       | 144530                 | 2876   | 0     | 9     | 547.786 | 1093.56                        | 0                          | 0      | 0      | -1 | 0  | 0 | 0 | 14 | 68.657  |
| NaN                                                                                                                | NaN     | NaN                    | 0      | 36689 | 2612  | 39289   | ATQFLNWSK_                     | ATQFLNWSK_                 | Q01574 | 14997  |    |    |   |   |    |         |
| <u>20150306_</u> <u>yeast3_</u> <u>Top_opt_2ug_C3_01_1665</u> + 3 MULTI CID TOF Acetyl (Protein N-term) diploid_02 |         |                        |        |       |       |         |                                |                            |        |        |    |    |   |   |    |         |
| 42474                                                                                                              | 65.951  | 1                      | 222080 | 8908  | 0     | 26      | 1020.51                        | 3058.5                     | 0      | 0      | 0  | -1 | 0 | 0 | 0  | 17      |
| 57.7376                                                                                                            | NaN     | NaN                    | NaN    | 0     | 39684 | 2788    | 42457                          | SNHSEILERPETPYDITYRVGVAENK |        |        |    |    |   |   |    |         |
| <u>_(ac)SNHSEILERPETPYDITYRVGVAENK_ P35182</u> 196729                                                              |         |                        |        |       |       |         |                                |                            |        |        |    |    |   |   |    |         |
| <u>20150306_</u> <u>yeast3_</u> <u>Top_opt_2ug_C3_01_1665</u> + 2 MULTI CID TOF Unmodified diploid_02 44197        |         |                        |        |       |       |         |                                |                            |        |        |    |    |   |   |    |         |
| 68.529                                                                                                             | 1       | 286920                 | 8023   | 0     | 14    | 759.882 | 1517.75                        | 0                          | 0      | 0      | -1 | 0  | 0 | 0 | 12 | 67.136  |
| NaN                                                                                                                | NaN     | NaN                    | 0      | 41311 | 2884  | 44185   | LSEGSDVDVDELIC_                | LSEGSDVDVDELIC_            | Q03081 | 134647 |    |    |   |   |    |         |
| <u>20150306_</u> <u>yeast3_</u> <u>Top_opt_2ug_C3_01_1665</u> + 2 MULTI CID TOF Unmodified diploid_02 44935        |         |                        |        |       |       |         |                                |                            |        |        |    |    |   |   |    |         |
| 69.579                                                                                                             | 1       | 746150                 | 38070  | 0     | 14    | 840.914 | 1679.81                        | 0                          | 0      | 0      | -1 | 0  | 0 | 0 | 12 | 55.5313 |
| NaN                                                                                                                | NaN     | NaN                    | 0      | 42008 | 2925  | 44923   | FINQDINDQDFALK_                | FINQDINDQDFALK_            | P43122 | 65994  |    |    |   |   |    |         |

|                                        |        |        |        |       |       |                         |                                  |                                           |                  |        |
|----------------------------------------|--------|--------|--------|-------|-------|-------------------------|----------------------------------|-------------------------------------------|------------------|--------|
| 20150306_yeast3_Top_opt_2ug_C3_01_1665 | +      | 3      | MULTI  | CID   | TOF   | Unmodified              | diploid_02                       | 45866                                     |                  |        |
| 70.842                                 | 1      | 330840 | 15102  | 0     | 12    | 498.904                 | 1493.69                          | 0                                         |                  |        |
| 0                                      | 0      | 0      | -1     | 0     | 0     | 0                       | 0                                | 7                                         |                  |        |
| NaN                                    | NaN    | NaN    | 0      | 42887 | 2977  | 45859                   | DIYNQLHMFGEK                     | _DIYNQLHMFGEK_ P43598                     | 26609            |        |
| 20150306_yeast3_Top_opt_2ug_C3_01_1665 | +      | 4      | MULTI  | CID   | TOF   | Unmodified              | diploid_02                       | 47280                                     |                  |        |
| 72.782                                 | 1      | 378370 | 2623   | 0     | 23    | 717.119                 | 2864.45                          | 0                                         |                  |        |
| 0                                      | 0      | 0      | -1     | 0     | 0     | 0                       | 0                                | 17                                        |                  |        |
| NaN                                    | NaN    | NaN    | 0      | 44223 | 3055  | 47263                   | EEYYRLQGLSEEDWEPVRVARLK          | _EEYYRLQGLSEEDWEPVRVARLK_ P47081          | 42122            |        |
| 20150306_yeast3_Top_opt_2ug_C3_01_1665 | +      | 3      | MULTI  | CID   | TOF   | Unmodified              | diploid_02                       | 47513                                     |                  |        |
| 73.11                                  | 1      | 452410 | 25932  | 0     | 13    | 553.609                 | 1657.81                          | 0                                         |                  |        |
| 0                                      | 0      | 0      | -1     | 0     | 0     | 0                       | 0                                | 16                                        |                  |        |
| NaN                                    | NaN    | NaN    | 0      | 44443 | 3068  | 47497                   | PLETIDLWEDHYK                    | _PLETIDLWEDHYK_ Q02887                    | 164966           |        |
| 20150306_yeast3_Top_opt_2ug_C3_01_1665 | +      | 2      | MULTI  | CID   | TOF   | Unmodified              | diploid_02                       | 47568                                     |                  |        |
| 73.178                                 | 1      | 300600 | 4687   | 0     | 15    | 807.896                 | 1613.78                          | 0                                         |                  |        |
| 0                                      | 0      | 0      | -1     | 0     | 0     | 0                       | 0                                | 17                                        |                  |        |
| NaN                                    | NaN    | NaN    | 0      | 44495 | 3071  | 47551                   | PGDEINDLIDSGEIK                  | _PGDEINDLIDSGEIK_ Q06177                  | 162578           |        |
| 20150306_yeast3_Top_opt_2ug_C3_01_1665 | +      | 2      | MULTI  | CID   | TOF   | Unmodified              | diploid_02                       | 49471                                     |                  |        |
| 75.996                                 | 1      | 253300 | 6208   | 0     | 23    | 1147.11                 | 2292.2                           | 0                                         |                  |        |
| 0                                      | 0      | 0      | -1     | 0     | 0     | 0                       | 0                                | 12                                        |                  |        |
| NaN                                    | NaN    | NaN    | 0      | 46292 | 3177  | 49459                   | SLQDLGVTSAAPVPDINAPQTA           | _SLQDLGVTSAAPVPDINAPQTA_ P53283           | 195290           |        |
| 20150306_yeast3_Top_opt_2ug_C3_01_1665 | +      | 2      | MULTI  | CID   | TOF   | Unmodified              | diploid_02                       | 53596                                     |                  |        |
| 82.238                                 | 1      | 298540 | 4652   | 0     | 16    | 890.954                 | 1779.89                          | 0                                         |                  |        |
| 0                                      | 0      | 0      | -1     | 0     | 0     | 0                       | 0                                | 15                                        |                  |        |
| NaN                                    | NaN    | NaN    | 0      | 50188 | 3406  | 53581                   | PIDVAQTFEVGNIYSK                 | _PIDVAQTFEVGNIYSK_ Q04749                 | 163947           |        |
| 20150306_yeast3_Top_opt_2ug_C3_01_1665 | +      | 3      | MULTI  | CID   | TOF   | Acetyl (Protein N-term) | diploid_02                       |                                           |                  |        |
| 53738                                  | 82.435 | 1      | 197010 | 5835  | 0     | 33                      | 1206.88                          | 3617.63                                   | 0                |        |
| 0                                      | 0      | 0      | -1     | 0     | 0     | 0                       | 0                                | 13                                        |                  |        |
| 48.798                                 | NaN    | NaN    | NaN    | 0     | 50322 | 3414                    | 53725                            | SGPPPPYEEQSSHLYGQPASSQDGN                 | AFIPEDFK_ P48558 | 190713 |
| 20150306_yeast3_Top_opt_2ug_C3_01_1665 | +      | 3      | MULTI  | CID   | TOF   | Unmodified              | diploid_02                       | 53956                                     |                  |        |
| 82.76                                  | 1      | 235950 | 1446   | 0     | 28    | 1048.49                 | 3142.46                          | 0                                         |                  |        |
| 0                                      | 0      | 0      | -1     | 0     | 0     | 0                       | 0                                | 15                                        |                  |        |
| NaN                                    | NaN    | NaN    | 0      | 50528 | 3426  | 53941                   | FLQSENFSDLTSEWDQSRSNTPGLAEGK     | _FLQSENFSDLTSEWDQSRSNTPGLAEGK_ P53124     | 67188            |        |
| 20150306_yeast3_Top_opt_2ug_C3_01_1665 | +      | 2      | MULTI  | CID   | TOF   | Unmodified              | diploid_02                       | 54169                                     |                  |        |
| 83.056                                 | 1      | 144170 | 6160   | 0     | 12    | 562.874                 | 1123.73                          | 0                                         |                  |        |
| 0                                      | 0      | 0      | -1     | 0     | 0     | 0                       | 0                                | 12                                        |                  |        |
| NaN                                    | NaN    | NaN    | 0      | 50729 | 3438  | 54157                   | VIIIGAGIAGLK                     | _VIIIGAGIAGLK_ P50264                     | 228621           |        |
| 20150306_yeast3_Top_opt_2ug_C3_01_1665 | +      | 3      | MULTI  | CID   | TOF   | Unmodified              | diploid_02                       | 54334                                     |                  |        |
| 83.291                                 | 1      | 348930 | 3203   | 0     | 22    | 830.414                 | 2488.22                          | 0                                         |                  |        |
| 0                                      | 0      | 0      | -1     | 0     | 0     | 0                       | 0                                | 15                                        |                  |        |
| NaN                                    | NaN    | NaN    | 0      | 50885 | 3447  | 54319                   | DIDGIRVALPQMTRNVNNDFS            | _DIDGIRVALPQMTRNVNNDFS_ Q12184            | 25084            |        |
| 20150306_yeast3_Top_opt_2ug_C3_01_1665 | +      | 2      | MULTI  | CID   | TOF   | Unmodified              | diploid_02                       | 55357                                     |                  |        |
| 84.717                                 | 1      | 140140 | 2972   | 0     | 10    | 599.329                 | 1196.64                          | 0                                         |                  |        |
| 0                                      | 0      | 0      | -1     | 0     | 0     | 0                       | 0                                | 12                                        |                  |        |
| NaN                                    | NaN    | NaN    | 0      | 51851 | 3504  | 55345                   | LSNELYAIFK                       | _LSNELYAIFK_ P40858                       | 135676           |        |
| 20150306_yeast3_Top_opt_2ug_C3_01_1665 | +      | 3      | MULTI  | CID   | TOF   | Unmodified              | diploid_02                       | 56708                                     |                  |        |
| 86.616                                 | 1      | 359390 | 4695   | 0     | 17    | 683.7                   | 2048.08                          | 0                                         |                  |        |
| 0                                      | 0      | 0      | -1     | 0     | 0     | 0                       | 0                                | 13                                        |                  |        |
| NaN                                    | NaN    | NaN    | 0      | 53127 | 3579  | 56695                   | EVEILEHQLNELIVQDK                | _EVEILEHQLNELIVQDK_ Q02888                | 58121            |        |
| 20150306_yeast3_Top_opt_2ug_C3_01_1665 | +      | 3      | MULTI  | CID   | TOF   | Unmodified              | diploid_02                       | 57313                                     |                  |        |
| 87.51                                  | 1      | 270010 | 3633   | 0     | 22    | 853.099                 | 2556.28                          | 0                                         |                  |        |
| 0                                      | 0      | 0      | -1     | 0     | 0     | 0                       | 0                                | 6                                         |                  |        |
| NaN                                    | NaN    | NaN    | 0      | 53698 | 3613  | 57307                   | PSTRYSLELFGPYVEDQSIEVK           | _PSTRYSLELFGPYVEDQSIEVK_ P38298           | 168344           |        |
| 20150306_yeast3_Top_opt_2ug_C3_01_1665 | +      | 4      | MULTI  | CID   | TOF   | Unmodified              | diploid_02                       | 57429                                     |                  |        |
| 87.671                                 | 1      | 708240 | 20405  | 0     | 32    | 912.18                  | 3644.69                          | 0                                         |                  |        |
| 0                                      | 0      | 0      | -1     | 0     | 0     | 0                       | 0                                | 14                                        |                  |        |
| NaN                                    | NaN    | NaN    | 0      | 53808 | 3619  | 57415                   | ATCSFEGCHSAVITINDDNIINLPEQVHSEFK | _ATCSFEGCHSAVITINDDNIINLPEQVHSEFK_ P32601 | 14344            |        |
| 20150306_yeast3_Top_opt_2ug_C3_01_1665 | +      | 3      | MULTI  | CID   | TOF   | Unmodified              | diploid_02                       | 57733                                     |                  |        |
| 88.125                                 | 1      | 419000 | 8174   | 0     | 21    | 798.081                 | 2391.22                          | 0                                         |                  |        |
| 0                                      | 0      | 0      | -1     | 0     | 0     | 0                       | 0                                | 12                                        |                  |        |
| NaN                                    | NaN    | NaN    | 0      | 54095 | 3636  | 57721                   | FQYDIPGLGYLENNPGRPITK            | _FQYDIPGLGYLENNPGRPITK_                   |                  |        |

Q12146 69319

|                                        |        |        |        |         |                         |            |         |                             |   |   |    |    |   |   |   |    |               |
|----------------------------------------|--------|--------|--------|---------|-------------------------|------------|---------|-----------------------------|---|---|----|----|---|---|---|----|---------------|
| 20150306_yeast3_Top_opt_2ug_C3_01_1665 | +      | 2      | MULTI  | CID TOF | Acetyl (Protein N-term) | diploid_02 |         |                             |   |   |    |    |   |   |   |    |               |
| 61986                                  | 94.421 | 1      | 782090 | 45787   | 0                       | 21         | 1038.47 | 2074.93                     | 0 | 0 | 0  | -1 | 0 | 0 | 0 | 0  | 17            |
| 97.4899                                | NaN    | NaN    | NaN    | 0       | 58112                   | 3872       | 61969   | MDGMFAMPGAAAGAASPQQPK       |   |   |    |    |   |   |   |    |               |
| _(ac)MDGMFAMPGAAAGAASPQQPK_            | P33448 | 142088 |        |         |                         |            |         |                             |   |   |    |    |   |   |   |    |               |
| 20150306_yeast3_Top_opt_2ug_C3_01_1665 | +      | 2      | MULTI  | CID TOF | Unmodified              | diploid_02 | 64601   |                             |   |   |    |    |   |   |   |    |               |
| 98.597                                 | 1      | 467310 | 5554   | 0       | 16                      | 898.955    | 1795.9  | 0                           | 0 | 0 | -1 | 0  | 0 | 0 | 0 | 4  | 38.2606       |
| NaN                                    | NaN    | NaN    | NaN    | 0       | 60581                   | 4018       | 64597   | DAGEIQTEYGVFNLIK            |   |   |    |    |   |   |   |    | Q12488        |
| 19524                                  |        |        |        |         |                         |            |         |                             |   |   |    |    |   |   |   |    |               |
| 20150306_yeast3_Top_opt_2ug_C3_01_1665 | +      | 3      | MULTI  | CID TOF | Unmodified              | diploid_02 | 68046   |                             |   |   |    |    |   |   |   |    |               |
| 104.01                                 | 1      | 617310 | 6690   | 0       | 26                      | 937.145    | 2808.41 | 0                           | 0 | 0 | -1 | 0  | 0 | 0 | 0 | 11 | 72.1583       |
| NaN                                    | NaN    | NaN    | NaN    | 0       | 63835                   | 4209       | 68035   | GLPIGTSYSLEYLGPIVNTQVDDETK  |   |   |    |    |   |   |   |    |               |
| _GLPIGTSYSLEYLGPIVNTQVDDETK_           | Q02896 | 77833  |        |         |                         |            |         |                             |   |   |    |    |   |   |   |    |               |
| 20150306_yeast3_Top_opt_2ug_C3_01_1665 | +      | 2      | MULTI  | CID TOF | Unmodified              | diploid_02 | 69992   |                             |   |   |    |    |   |   |   |    |               |
| 105.64                                 | 1      | 902020 | 39189  | 0       | 19                      | 1014.56    | 2027.11 | 0                           | 0 | 0 | -1 | 0  | 0 | 0 | 0 | 13 | 153.25        |
| NaN                                    | NaN    | NaN    | NaN    | 0       | 65673                   | 4317       | 69979   | SIQDIVGLATLIVNTDVEK         |   |   |    |    |   |   |   |    |               |
| P32342                                 | 193089 |        |        |         |                         |            |         |                             |   |   |    |    |   |   |   |    |               |
| 20150306_yeast3_Top_opt_2ug_C3_01_1667 | +      | 2      | MULTI  | CID TOF | Unmodified              | diploid_03 | 5773    |                             |   |   |    |    |   |   |   |    |               |
| 11.621                                 | 1      | 184310 | 21349  | 0       | 19                      | 980.952    | 1959.89 | 0                           | 0 | 0 | -1 | 0  | 0 | 0 | 0 | 12 | 189.149       |
| NaN                                    | NaN    | NaN    | NaN    | 0       | 4995                    | 776        | 5761    | SSISNTSDHDGANRASDVK         |   |   |    |    |   |   |   |    |               |
| Q03559                                 | 200647 |        |        |         |                         |            |         |                             |   |   |    |    |   |   |   |    |               |
| 20150306_yeast3_Top_opt_2ug_C3_01_1667 | +      | 2      | MULTI  | CID TOF | Unmodified              | diploid_03 | 8095    |                             |   |   |    |    |   |   |   |    |               |
| 15.401                                 | 1      | 20600  | 1186   | 0       | 17                      | 918.38     | 1834.75 | 0                           | 0 | 0 | -1 | 0  | 0 | 0 | 0 | 12 | 45.2206       |
| NaN                                    | NaN    | NaN    | NaN    | 0       | 7188                    | 905        | 8083    | QDSNDTSDSPQDDQVGK           |   |   |    |    |   |   |   |    | Q03687        |
| 171784                                 |        |        |        |         |                         |            |         |                             |   |   |    |    |   |   |   |    |               |
| 20150306_yeast3_Top_opt_2ug_C3_01_1667 | +      | 4      | MULTI  | CID TOF | Unmodified              | diploid_03 | 11644   |                             |   |   |    |    |   |   |   |    |               |
| 21.171                                 | 1      | 136420 | 11362  | 0       | 19                      | 527.018    | 2104.04 | 0                           | 0 | 0 | -1 | 0  | 0 | 0 | 0 | 15 | 64.5215       |
| NaN                                    | NaN    | NaN    | NaN    | 0       | 10540                   | 1102       | 11629   | SESHPPNHPHSQILQTPAK         |   |   |    |    |   |   |   |    |               |
| P40021                                 | 189023 |        |        |         |                         |            |         |                             |   |   |    |    |   |   |   |    |               |
| 20150306_yeast3_Top_opt_2ug_C3_01_1667 | +      | 2      | MULTI  | CID TOF | Unmodified              | diploid_03 | 15796   |                             |   |   |    |    |   |   |   |    |               |
| 27.248                                 | 1      | 99108  | 1374   | 0       | 11                      | 651.332    | 1300.65 | 0                           | 0 | 0 | -1 | 0  | 0 | 0 | 0 | 9  | 84.4793       |
| NaN                                    | NaN    | NaN    | NaN    | 0       | 14461                   | 1333       | 15787   | VLEEQEEVAQK                 |   |   |    |    |   |   |   |    | P21192 230133 |
| 20150306_yeast3_Top_opt_2ug_C3_01_1667 | +      | 3      | MULTI  | CID TOF | Unmodified              | diploid_03 | 17010   |                             |   |   |    |    |   |   |   |    |               |
| 29.067                                 | 1      | 168290 | 5018   | 0       | 17                      | 584.96     | 1751.86 | 0                           | 0 | 0 | -1 | 0  | 0 | 0 | 0 | 17 | 73.0929       |
| NaN                                    | NaN    | NaN    | NaN    | 0       | 15608                   | 1400       | 16993   | SDSIGLSSSNTTNSVRK           |   |   |    |    |   |   |   |    | P18494        |
| 187551                                 |        |        |        |         |                         |            |         |                             |   |   |    |    |   |   |   |    |               |
| 20150306_yeast3_Top_opt_2ug_C3_01_1667 | +      | 2      | MULTI  | CID TOF | Unmodified              | diploid_03 | 17185   |                             |   |   |    |    |   |   |   |    |               |
| 29.316                                 | 1      | 102520 | 1009   | 0       | 13                      | 712.817    | 1423.62 | 0                           | 0 | 0 | -1 | 0  | 0 | 0 | 0 | 12 | 81.6249       |
| NaN                                    | NaN    | NaN    | NaN    | 0       | 15773                   | 1410       | 17173   | ETeAMNSEIDGTK               |   |   |    |    |   |   |   |    | Q03818 56796  |
| 20150306_yeast3_Top_opt_2ug_C3_01_1667 | +      | 3      | MULTI  | CID TOF | Unmodified              | diploid_03 | 20339   |                             |   |   |    |    |   |   |   |    |               |
| 33.919                                 | 1      | 181190 | 9255   | 0       | 16                      | 609.311    | 1824.91 | 0                           | 0 | 0 | -1 | 0  | 0 | 0 | 0 | 16 | 48.8985       |
| NaN                                    | NaN    | NaN    | NaN    | 0       | 18752                   | 1585       | 20323   | IQEVTPQLHETNTSTK            |   |   |    |    |   |   |   |    | P53227        |
| 102532                                 |        |        |        |         |                         |            |         |                             |   |   |    |    |   |   |   |    |               |
| 20150306_yeast3_Top_opt_2ug_C3_01_1667 | +      | 2      | MULTI  | CID TOF | Unmodified              | diploid_03 | 20910   |                             |   |   |    |    |   |   |   |    |               |
| 34.753                                 | 1      | 112090 | 2487   | 0       | 13                      | 700.316    | 1398.62 | 0                           | 0 | 0 | -1 | 0  | 0 | 0 | 0 | 11 | 84.2973       |
| NaN                                    | NaN    | NaN    | NaN    | 0       | 19291                   | 1617       | 20899   | DPSISDSTSYAEK               |   |   |    |    |   |   |   |    | P35735 30605  |
| 20150306_yeast3_Top_opt_2ug_C3_01_1667 | +      | 4      | MULTI  | CID TOF | Unmodified              | diploid_03 | 21653   |                             |   |   |    |    |   |   |   |    |               |
| 35.868                                 | 1      | 181920 | 1906   | 0       | 27                      | 742.855    | 2967.39 | 0                           | 0 | 0 | -1 | 0  | 0 | 0 | 0 | 16 | 70.7178       |
| NaN                                    | NaN    | NaN    | NaN    | 0       | 19993                   | 1658       | 21637   | INHRGEDVTGQQIDLNNSEGNENSVTK |   |   |    |    |   |   |   |    |               |
| _INHRGEDVTGQQIDLNNSEGNENSVTK_          | P35208 | 100793 |        |         |                         |            |         |                             |   |   |    |    |   |   |   |    |               |
| 20150306_yeast3_Top_opt_2ug_C3_01_1667 | +      | 2      | MULTI  | CID TOF | Unmodified              | diploid_03 | 24746   |                             |   |   |    |    |   |   |   |    |               |
| 40.301                                 | 1      | 161780 | 2842   | 0       | 14                      | 812.379    | 1622.74 | 0                           | 0 | 0 | -1 | 0  | 0 | 0 | 0 | 13 | 80.3867       |
| NaN                                    | NaN    | NaN    | NaN    | 0       | 22914                   | 1830       | 24733   | EGQEEGYNEQLISK              |   |   |    |    |   |   |   |    | Q08970 43838  |
| 20150306_yeast3_Top_opt_2ug_C3_01_1667 | +      | 2      | MULTI  | CID TOF | Unmodified              | diploid_03 | 24864   |                             |   |   |    |    |   |   |   |    |               |

|           |         |              |            |     |         |          |            |        |                                 |                         |               |        |   |        |      |       |         |         |         |   |   |   |    |   |   |   |   |    |
|-----------|---------|--------------|------------|-----|---------|----------|------------|--------|---------------------------------|-------------------------|---------------|--------|---|--------|------|-------|---------|---------|---------|---|---|---|----|---|---|---|---|----|
| 40.461    | 1       | 106160       | 8377       | 0   | 8       | 476.225  | 950.436    | 0      | 0                               | 0                       | -1            | 0      | 0 | 0      | 0    | 5     | 72.23   |         |         |   |   |   |    |   |   |   |   |    |
| NaN       | NaN     | NaN          | NaN        | 0   |         | SLWDSSEK | _SLWDSSEK_ | P37298 | 195898                          |                         |               |        |   |        |      |       |         |         |         |   |   |   |    |   |   |   |   |    |
| 20150306_ | yeast3_ | Top_opt_2ug_ | C3_01_1667 |     |         | +        | 2          | MULTI  | CID TOF Unmodified              | diploid_03              | 24936         |        |   |        |      |       |         |         |         |   |   |   |    |   |   |   |   |    |
| 40.558    | 1       | 129760       | 4316       | 0   | 7       | 487.737  | 973.46     | 0      | 0                               | 0                       | -1            | 0      | 0 | 0      | 0    | 5     | 81.7839 |         |         |   |   |   |    |   |   |   |   |    |
| NaN       | NaN     | NaN          | NaN        | 0   |         | 23093    | 1841       | 24931  | YMQEYLK                         | _YMQEYLK_Q3E731         | 247761        |        |   |        |      |       |         |         |         |   |   |   |    |   |   |   |   |    |
| 20150306_ | yeast3_ | Top_opt_2ug_ | C3_01_1667 |     |         | +        | 3          | MULTI  | CID TOF Unmodified              | diploid_03              | 24939         |        |   |        |      |       |         |         |         |   |   |   |    |   |   |   |   |    |
| 40.562    | 1       | 136080       | 3410       | 0   | 21      | 765.368  | 2293.08    | 0      | 0                               | 0                       | -1            | 0      | 0 | 0      | 0    | 8     | 58.107  |         |         |   |   |   |    |   |   |   |   |    |
| NaN       | NaN     | NaN          | NaN        | 0   |         | 23096    | 1841       | 24931  | SESGVTYRQNASVDPELDQAK           | _SESGVTYRQNASVDPELDQAK_ | Q03718        | 189022 |   |        |      |       |         |         |         |   |   |   |    |   |   |   |   |    |
| 20150306_ | yeast3_ | Top_opt_2ug_ | C3_01_1667 |     |         | +        | 2          | MULTI  | CID TOF Unmodified              | diploid_03              | 25324         |        |   |        |      |       |         |         |         |   |   |   |    |   |   |   |   |    |
| 41.111    | 1       | 328380       | 5790       | 0   | 10      | 579.328  | 1156.64    | 0      | 0                               | 0                       | -1            | 0      | 0 | 0      | 0    | 15    | 58.6993 |         |         |   |   |   |    |   |   |   |   |    |
| NaN       | NaN     | NaN          | NaN        | 0   |         | 23460    | 1862       | 25309  | LLQVSQVENK                      | _LLQVSQVENK_            | P32459        | 127753 |   |        |      |       |         |         |         |   |   |   |    |   |   |   |   |    |
| 20150306_ | yeast3_ | Top_opt_2ug_ | C3_01_1667 |     |         | +        | 2          | MULTI  | CID TOF Unmodified              | diploid_03              | 25913         |        |   |        |      |       |         |         |         |   |   |   |    |   |   |   |   |    |
| 41.922    | 1       | 183180       | 1809       | 0   | 14      | 687.37   | 1372.73    | 0      | 0                               | 0                       | -1            | 0      | 0 | 0      | 0    | 10    | 49.9877 |         |         |   |   |   |    |   |   |   |   |    |
| NaN       | NaN     | NaN          | NaN        | 0   |         | 24016    | 1895       | 25903  | LLGNVGNSSNTGIK                  | _LLGNVGNSSNTGIK_        | Q12128        | 126206 |   |        |      |       |         |         |         |   |   |   |    |   |   |   |   |    |
| 20150306_ | yeast3_ | Top_opt_2ug_ | C3_01_1667 |     |         | +        | 2          | MULTI  | CID TOF Unmodified              | diploid_03              | 29502         |        |   |        |      |       |         |         |         |   |   |   |    |   |   |   |   |    |
| 46.805    | 1       | 177440       | 1219       | 0   | 13      | 714.395  | 1426.78    | 0      | 0                               | 0                       | -1            | 0      | 0 | 0      | 0    | 17    | 67.0193 |         |         |   |   |   |    |   |   |   |   |    |
| NaN       | NaN     | NaN          | NaN        | 0   |         | 27406    | 2094       | 29485  | VGGIEDRQLEALK                   | _VGGIEDRQLEALK_         | Q06549        | 226981 |   |        |      |       |         |         |         |   |   |   |    |   |   |   |   |    |
| 20150306_ | yeast3_ | Top_opt_2ug_ | C3_01_1667 |     |         | +        | 2          | MULTI  | CID TOF Unmodified              | diploid_03              | 31422         |        |   |        |      |       |         |         |         |   |   |   |    |   |   |   |   |    |
| 49.523    | 1       | 323740       | 6058       | 0   | 11      | 612.314  | 1222.61    | 0      | 0                               | 0                       | -1            | 0      | 0 | 0      | 0    | 11    | 103.909 |         |         |   |   |   |    |   |   |   |   |    |
| NaN       | NaN     | NaN          | NaN        | 0   |         | 29219    | 2201       | 31411  | DHGVEDPLTLK                     | _DHGVEDPLTLK_           | Q03246        | 24601  |   |        |      |       |         |         |         |   |   |   |    |   |   |   |   |    |
| 20150306_ | yeast3_ | Top_opt_2ug_ | C3_01_1667 |     |         | +        | 3          | MULTI  | CID TOF Unmodified              | diploid_03              | 31528         |        |   |        |      |       |         |         |         |   |   |   |    |   |   |   |   |    |
| 49.687    | 1       | 305630       | 4814       | 0   | 14      | 527.282  | 1578.82    | 0      | 0                               | 0                       | -1            | 0      | 0 | 0      | 0    | 9     | 91.812  |         |         |   |   |   |    |   |   |   |   |    |
| NaN       | NaN     | NaN          | NaN        | 0   |         | 29319    | 2207       | 31519  | LDTLNEPSAHLIEK                  | _LDTLNEPSAHLIEK_        | P39552;P53176 | 117194 |   |        |      |       |         |         |         |   |   |   |    |   |   |   |   |    |
| 20150306_ | yeast3_ | Top_opt_2ug_ | C3_01_1667 |     |         | +        | 3          | MULTI  | CID TOF Unmodified              | diploid_03              | 33688         |        |   |        |      |       |         |         |         |   |   |   |    |   |   |   |   |    |
| 52.737    | 1       | 47723        | 1868       | 0   | 9       | 354.21   | 1059.61    | 0      | 0                               | 0                       | -1            | 0      | 0 | 0      | 0    | 9     | 82.7505 |         |         |   |   |   |    |   |   |   |   |    |
| NaN       | NaN     | NaN          | NaN        | 0   |         | 31359    | 2327       | 33679  | PLDFLRTAK                       | _PLDFLRTAK_             | P36533        | 164757 |   |        |      |       |         |         |         |   |   |   |    |   |   |   |   |    |
| 20150306_ | yeast3_ | Top_opt_2ug_ | C3_01_1667 |     |         | +        | 2          | MULTI  | CID TOF Unmodified              | diploid_03              | 35236         |        |   |        |      |       |         |         |         |   |   |   |    |   |   |   |   |    |
| 54.866    | 1       | 410370       | 38063      | 0   | 14      | 772.884  | 1543.75    | 0      | 0                               | 0                       | -1            | 0      | 0 | 0      | 0    | 9     | 44.9254 |         |         |   |   |   |    |   |   |   |   |    |
| NaN       | NaN     | NaN          | NaN        | 0   |         | 32821    | 2413       | 35227  | TLSGNDYINASYVK                  | _TLSGNDYINASYVK_        | P25044        | 214804 |   |        |      |       |         |         |         |   |   |   |    |   |   |   |   |    |
| 20150306_ | yeast3_ | Top_opt_2ug_ | C3_01_1667 |     |         | +        | 2          | MULTI  | CID TOF Unmodified              | diploid_03              | 37821         |        |   |        |      |       |         |         |         |   |   |   |    |   |   |   |   |    |
| 58.459    | 1       | 189050       | 1509       | 0   | 11      | 643.331  | 1284.65    | 0      | 0                               | 0                       | -1            | 0      | 0 | 0      | 0    | 2     | 47.7121 |         |         |   |   |   |    |   |   |   |   |    |
| NaN       | NaN     | NaN          | NaN        | 0   |         | 35262    | 2557       | 37819  | VGQPAFFYQTK                     | _VGQPAFFYQTK_           | P40857        | 227346 |   |        |      |       |         |         |         |   |   |   |    |   |   |   |   |    |
| 20150306_ | yeast3_ | Top_opt_2ug_ | C3_01_1667 |     |         | +        | 2          | MULTI  | CID TOF Unmodified              | diploid_03              | 40566         |        |   |        |      |       |         |         |         |   |   |   |    |   |   |   |   |    |
| 62.135    | 1       | 427990       | 6691       | 0   | 12      | 644.851  | 1287.69    | 0      | 0                               | 0                       | -1            | 0      | 0 | 0      | 0    | 11    | 46.0691 |         |         |   |   |   |    |   |   |   |   |    |
| NaN       | NaN     | NaN          | NaN        | 0   |         | 37855    | 2709       | 40555  | LQVNGITMADV K                   | _LQVNGITMADV K_         | P25454        | 133458 |   |        |      |       |         |         |         |   |   |   |    |   |   |   |   |    |
| 20150306_ | yeast3_ | Top_opt_2ug_ | C3_01_1667 |     |         | +        | 3          | MULTI  | CID TOF Unmodified              | diploid_03              | 42709         |        |   |        |      |       |         |         |         |   |   |   |    |   |   |   |   |    |
| 65.2.1    | 99331   | 2007         | 0          | 13  | 491.276 | 1470.81  | 0          | 0      | 0                               | -1                      | 0             | 0      | 0 | 0      | 12   | 58.32 | NaN     |         |         |   |   |   |    |   |   |   |   |    |
| NaN       | NaN     | NaN          | NaN        | 0   |         | 39879    | 2828       | 42697  | DDSSLNITPRLK                    | _DDSSLNITPRLK_          | P32611        | 21336  |   |        |      |       |         |         |         |   |   |   |    |   |   |   |   |    |
| 20150306_ | yeast3_ | Top_opt_2ug_ | C3_01_1667 |     |         | +        | 2          | MULTI  | CID TOF Unmodified              | diploid_03              | 42716         |        |   |        |      |       |         |         |         |   |   |   |    |   |   |   |   |    |
| 65.213    | 1       | 456950       | 47980      | 0   | 10      | 591.296  | 1180.58    | 0      | 0                               | 0                       | -1            | 0      | 0 | 0      | 0    | 1     | 79.3106 |         |         |   |   |   |    |   |   |   |   |    |
| NaN       | NaN     | NaN          | NaN        | 0   |         | 39885    | 2829       | 42715  | DGVYENIPFK                      | _DGVYENIPFK_            | P04039        | 24430  |   |        |      |       |         |         |         |   |   |   |    |   |   |   |   |    |
| 20150306_ | yeast3_ | Top_opt_2ug_ | C3_01_1667 |     |         | +        | 2          | MULTI  | CID TOF Acetyl (Protein N-term) | diploid_03              | 43088         | 65.756 | 1 | 272590 | 4391 | 0     | 13      | 729.402 | 1456.79 | 0 | 0 | 0 | -1 | 0 | 0 | 0 | 0 | 13 |
| 60.5499   | NaN     | NaN          | NaN        | NaN | 0       | 40237    | 2849       | 43075  | SRVAQLDSIALDK                   | _(ac)SRVAQLDSIALDK_     | P32800        | 199950 |   |        |      |       |         |         |         |   |   |   |    |   |   |   |   |    |
| 20150306_ | yeast3_ | Top_opt_2ug_ | C3_01_1667 |     |         | +        | 3          | MULTI  | CID TOF Unmodified              | diploid_03              | 43827         |        |   |        |      |       |         |         |         |   |   |   |    |   |   |   |   |    |
| 66.889    | 1       | 394860       | 3409       | 0   | 18      | 699.037  | 2094.09    | 0      | 0                               | 0                       | -1            | 0      | 0 | 0      | 0    | 14    | 39.91   |         |         |   |   |   |    |   |   |   |   |    |
| NaN       | NaN     | NaN          | NaN        | 0   |         | 40935    | 2890       | 43813  | HLSTLPNVPWPNRSFTTK              | _HLSTLPNVPWPNRSFTTK_    | Q8TGM887085   |        |   |        |      |       |         |         |         |   |   |   |    |   |   |   |   |    |
| 20150306_ | yeast3_ | Top_opt_2ug_ | C3_01_1667 |     |         | +        | 3          | MULTI  | CID TOF Unmodified              | diploid_03              | 44346         |        |   |        |      |       |         |         |         |   |   |   |    |   |   |   |   |    |

|                                                                             |         |              |            |      |    |         |         |         |     |                         |    |            |   |   |   |    |             |
|-----------------------------------------------------------------------------|---------|--------------|------------|------|----|---------|---------|---------|-----|-------------------------|----|------------|---|---|---|----|-------------|
| 67.659                                                                      | 1       | 337320       | 6521       | 0    | 16 | 574.961 | 1721.86 | 0       | 0   | 0                       | -1 | 0          | 0 | 0 | 0 | 11 | 130.717     |
| NaNNaNNaN0 41425 2919 44335 FLSSLEDSSAHA AFLK _FLSSLEDSSAHA AFLK_ P36167    |         |              |            |      |    |         |         |         |     |                         |    |            |   |   |   |    |             |
| 67341                                                                       |         |              |            |      |    |         |         |         |     |                         |    |            |   |   |   |    |             |
| 20150306_                                                                   | yeast3_ | Top_opt_2ug_ | C3_01_1667 |      | +  | 3       | MULTI   | CID     | TOF | Unmodified              |    | diploid_03 |   |   |   |    | 44772       |
| 68.273                                                                      | 1       | 286210       | 4525       | 0    | 22 | 798.743 | 2393.21 | 0       | 0   | 0                       | -1 | 0          | 0 | 0 | 0 | 5  | 70.9935     |
| NaNNaNNaN0 41827 2943 44767 NDNVESLNSSVRGIWSPLHAAK                          |         |              |            |      |    |         |         |         |     |                         |    |            |   |   |   |    |             |
| _NDNVESLNSSVRGIWSPLHAAK_ Q06090 148781                                      |         |              |            |      |    |         |         |         |     |                         |    |            |   |   |   |    |             |
| 20150306_                                                                   | yeast3_ | Top_opt_2ug_ | C3_01_1667 |      | +  | 2       | MULTI   | CID     | TOF | Unmodified              |    | diploid_03 |   |   |   |    | 47717       |
| 72.32                                                                       | 1       | 113780       | 4910       | 0    | 9  | 495.271 | 988.528 | 0       | 0   | 0                       | -1 | 0          | 0 | 0 | 0 | 16 | 66.6919     |
| NaNNaNNaN0 44609 3106 47701 DDVMLGVLK _DDVMLGVLK_ P43592 21429              |         |              |            |      |    |         |         |         |     |                         |    |            |   |   |   |    |             |
| 20150306_                                                                   | yeast3_ | Top_opt_2ug_ | C3_01_1667 |      | +  | 3       | MULTI   | CID     | TOF | Unmodified              |    | diploid_03 |   |   |   |    | 49948       |
| 75.47                                                                       | 1       | 407960       | 3084       | 0    | 17 | 667.345 | 1999.01 | 0       | 0   | 0                       | -1 | 0          | 0 | 0 | 0 | 15 | 47.6798     |
| NaNNaNNaN0 46716 3230 49933 LIEPRLALNAVCQMDEK _LIEPRLALNAVCQMDEK_           |         |              |            |      |    |         |         |         |     |                         |    |            |   |   |   |    |             |
| Q12069 123353                                                               |         |              |            |      |    |         |         |         |     |                         |    |            |   |   |   |    |             |
| 20150306_                                                                   | yeast3_ | Top_opt_2ug_ | C3_01_1667 |      | +  | 2       | MULTI   | CID     | TOF | Acetyl (Protein N-term) |    | diploid_03 |   |   |   |    |             |
| 53076                                                                       | 80.047  | 1            | 411070     | 4607 | 0  | 17      | 905.92  | 1809.82 | 0   | 0                       | 0  | -1         | 0 | 0 | 0 | 0  | 11          |
| 125.975 NaNNaNNaN0 49670 3404 53065 MFSLSSLSSSGGHSEQK                       |         |              |            |      |    |         |         |         |     |                         |    |            |   |   |   |    |             |
| _(ac)MFSLSSLSSSGGHSEQK_ P53244 143312                                       |         |              |            |      |    |         |         |         |     |                         |    |            |   |   |   |    |             |
| 20150306_                                                                   | yeast3_ | Top_opt_2ug_ | C3_01_1667 |      | +  | 3       | MULTI   | CID     | TOF | Unmodified              |    | diploid_03 |   |   |   |    | 56113       |
| 84.456                                                                      | 1       | 362090       | 4069       | 0    | 28 | 1032.79 | 3095.35 | 0       | 0   | 0                       | -1 | 0          | 0 | 0 | 0 | 6  | 63.0948     |
| NaNNaNNaN0 52538 3573 56107 ECSIDWEDVYPGTGLQASTMVGDDVHSK                    |         |              |            |      |    |         |         |         |     |                         |    |            |   |   |   |    |             |
| _ECSIDWEDVYPGTGLQASTMVGDDVHSK_ P38293 38614                                 |         |              |            |      |    |         |         |         |     |                         |    |            |   |   |   |    |             |
| 20150306_                                                                   | yeast3_ | Top_opt_2ug_ | C3_01_1667 |      | +  | 2       | MULTI   | CID     | TOF | Unmodified              |    | diploid_03 |   |   |   |    | 57129       |
| 85.901                                                                      | 1       | 375510       | 3630       | 0    | 20 | 1097.54 | 2193.06 | 0       | 0   | 0                       | -1 | 0          | 0 | 0 | 0 | 14 | 48.6162     |
| NaNNaNNaN0 53498 3629 57115 ISDVSGIYPSGNIVMERLDE _ISDVSGIYPSGNIVMERLDE_     |         |              |            |      |    |         |         |         |     |                         |    |            |   |   |   |    |             |
| Q12229 103865                                                               |         |              |            |      |    |         |         |         |     |                         |    |            |   |   |   |    |             |
| 20150306_                                                                   | yeast3_ | Top_opt_2ug_ | C3_01_1667 |      | +  | 3       | MULTI   | CID     | TOF | Unmodified              |    | diploid_03 |   |   |   |    | 57706       |
| 86.731                                                                      | 1       | 567980       | 4850       | 0    | 23 | 869.75  | 2606.23 | 0       | 0   | 0                       | -1 | 0          | 0 | 0 | 0 | 15 | 82.8854     |
| NaNNaNNaN0 54043 3661 57691 RFLNPDAMLLMETEGMNQASNP                          |         |              |            |      |    |         |         |         |     |                         |    |            |   |   |   |    |             |
| _RFLNPDAMLLMETEGMNQASNP_ Q06543 180217                                      |         |              |            |      |    |         |         |         |     |                         |    |            |   |   |   |    |             |
| 20150306_                                                                   | yeast3_ | Top_opt_2ug_ | C3_01_1667 |      | +  | 3       | MULTI   | CID     | TOF | Unmodified              |    | diploid_03 |   |   |   |    | 65689       |
| 98.657                                                                      | 1       | 488430       | 3370       | 0    | 28 | 1018.19 | 3051.53 | 0       | 0   | 0                       | -1 | 0          | 0 | 0 | 0 | 6  | 80.6641     |
| NaNNaNNaN0 61582 4105 65683 FVTEEDVIFEPVSAQSAIARSLETTANK                    |         |              |            |      |    |         |         |         |     |                         |    |            |   |   |   |    |             |
| _FVTEEDVIFEPVSAQSAIARSLETTANK_ P40219 71825                                 |         |              |            |      |    |         |         |         |     |                         |    |            |   |   |   |    |             |
| 20150306_                                                                   | yeast3_ | Top_opt_2ug_ | C3_01_1667 |      | +  | 2       | MULTI   | CID     | TOF | Unmodified              |    | diploid_03 |   |   |   |    | 65867       |
| 98.919                                                                      | 1       | 147240       | 4845       | 0    | 11 | 659.363 | 1316.71 | 0       | 0   | 0                       | -1 | 0          | 0 | 0 | 0 | 4  | 49.4481     |
| NaNNaNNaN0 61750 4115 65863 WDIVLSNMLVK _WDIVLSNMLVK_ Q96VH5 240452         |         |              |            |      |    |         |         |         |     |                         |    |            |   |   |   |    |             |
| 20150306_                                                                   | yeast3_ | Top_opt_2ug_ | C3_01_1667 |      | +  | 2       | MULTI   | CID     | TOF | Unmodified              |    | diploid_03 |   |   |   |    | 71001       |
| 105.68                                                                      | 1       | 465660       | 24392      | 0    | 15 | 849.492 | 1696.97 | 0       | 0   | 0                       | -1 | 0          | 0 | 0 | 0 | 8  | 75.5351     |
| NaNNaNNaN0 66599 4400 70993 SAIDVIQWLIPTITK _SAIDVIQWLIPTITK_ P40532 185743 |         |              |            |      |    |         |         |         |     |                         |    |            |   |   |   |    |             |
| 20150306_                                                                   | yeast3_ | Top_opt_2ug_ | C3_01_1669 |      | +  | 2       | MULTI   | CID     | TOF | Unmodified              |    | diploid_04 |   |   |   |    | 9243        |
| 17.177                                                                      | 1       | 76281        | 958        | 0    | 10 | 581.753 | 1161.49 | 0       | 0   | 0                       | -1 | 0          | 0 | 0 | 0 | 17 | 93.3246 NaN |
| NaNNaN0 8313 928 9226 PNCGLCDQAK _PNCGLCDQAK_ Q05530 166585                 |         |              |            |      |    |         |         |         |     |                         |    |            |   |   |   |    |             |
| 20150306_                                                                   | yeast3_ | Top_opt_2ug_ | C3_01_1669 |      | +  | 3       | MULTI   | CID     | TOF | Unmodified              |    | diploid_04 |   |   |   |    | 10238       |
| 18.725                                                                      | 1       | 139660       | 15054      | 0    | 17 | 611.287 | 1830.84 | 0       | 0   | 0                       | -1 | 0          | 0 | 0 | 0 | 4  | 47.0818     |
| NaNNaNNaN0 9252 984 10234 TSTDPDTSANTNHTLEK _TSTDPDTSANTNHTLEK_ P38140      |         |              |            |      |    |         |         |         |     |                         |    |            |   |   |   |    |             |
| 218933                                                                      |         |              |            |      |    |         |         |         |     |                         |    |            |   |   |   |    |             |
| 20150306_                                                                   | yeast3_ | Top_opt_2ug_ | C3_01_1669 |      | +  | 2       | MULTI   | CID     | TOF | Unmodified              |    | diploid_04 |   |   |   |    | 10890       |
| 19.787                                                                      | 1       | 102560       | 3395       | 0    | 8  | 493.772 | 985.529 | 0       | 0   | 0                       | -1 | 0          | 0 | 0 | 0 | 8  | 89.3546     |
| NaNNaNNaN0 9868 1020 10882 YVHETPLK _YVHETPLK_ Q12428 250130                |         |              |            |      |    |         |         |         |     |                         |    |            |   |   |   |    |             |
| 20150306_                                                                   | yeast3_ | Top_opt_2ug_ | C3_01_1669 |      | +  | 2       | MULTI   | CID     | TOF | Unmodified              |    | diploid_04 |   |   |   |    | 11493       |
| 20.73                                                                       | 1       | 196050       | 5414       | 0    | 10 | 525.766 | 1049.52 | 0       | 0   | 0                       | -1 | 0          | 0 | 0 | 0 | 17 | 58.6986     |
| NaNNaNNaN0 10438 1053 11476 STTQVGC GIK _STTQVGC GIK_ P47032 203040         |         |              |            |      |    |         |         |         |     |                         |    |            |   |   |   |    |             |
| 20150306_                                                                   | yeast3_ | Top_opt_2ug_ | C3_01_1669 |      | +  | 2       | MULTI   | CID     | TOF | Unmodified              |    | diploid_04 |   |   |   |    | 12842       |



|           |         |                        |       |       |      |         |                           |   |   |   |    |   |   |   |   |    |         |                             |       |         |            |            |       |
|-----------|---------|------------------------|-------|-------|------|---------|---------------------------|---|---|---|----|---|---|---|---|----|---------|-----------------------------|-------|---------|------------|------------|-------|
| 22.732    | 1       | 47733                  | 2130  | 0     | 18   | 923.896 | 1845.78                   | 0 | 0 | 0 | -1 | 0 | 0 | 0 | 0 | 16 | 55.3373 |                             |       |         |            |            |       |
| NaN       | NaN     | NaN                    | 0     | 11712 | 1128 | 12826   | GDGNDDDNNTVTANPTAR        |   |   |   |    |   |   |   |   |    |         | _GDGNDDDNNTVTANPTAR_        |       |         |            |            |       |
| P47087    | 73343   |                        |       |       |      |         |                           |   |   |   |    |   |   |   |   |    |         |                             |       |         |            |            |       |
| 20150306_ | yeast3_ | Top_opt_2ug_C3_01_1669 |       |       |      |         |                           |   |   |   |    |   |   |   |   |    |         | + 2                         | MULTI | CID TOF | Unmodified | diploid_04 | 15161 |
| 26.124    | 1       | 91000                  | 9231  | 0     | 17   | 886.425 | 1770.84                   | 0 | 0 | 0 | -1 | 0 | 0 | 0 | 0 | 13 | 39.364  |                             |       |         |            |            |       |
| NaN       | NaN     | NaN                    | 0     | 13902 | 1257 | 15148   | GVGSTEVVHNSVENEK          |   |   |   |    |   |   |   |   |    |         | _GVGSTEVVHNSVENEK_          |       |         |            |            |       |
| P24869    | 82555   |                        |       |       |      |         |                           |   |   |   |    |   |   |   |   |    |         |                             |       |         |            |            |       |
| 20150306_ | yeast3_ | Top_opt_2ug_C3_01_1669 |       |       |      |         |                           |   |   |   |    |   |   |   |   |    |         | + 3                         | MULTI | CID TOF | Unmodified | diploid_04 | 15707 |
| 26.936    | 1       | 439810                 | 49918 | 0     | 12   | 492.593 | 1474.76                   | 0 | 0 | 0 | -1 | 0 | 0 | 0 | 0 | 1  | 186.159 |                             |       |         |            |            |       |
| NaN       | NaN     | NaN                    | 0     | 14417 | 1288 | 15706   | RMESDAEILRQK              |   |   |   |    |   |   |   |   |    |         | _RMESDAEILRQK_              |       |         |            |            |       |
| 20150306_ | yeast3_ | Top_opt_2ug_C3_01_1669 |       |       |      |         |                           |   |   |   |    |   |   |   |   |    |         | + 2                         | MULTI | CID TOF | Unmodified | diploid_04 | 18530 |
| 31.04     | 1       | 126220                 | 1606  | 0     | 10   | 624.257 | 1246.5                    | 0 | 0 | 0 | -1 | 0 | 0 | 0 | 0 | 16 | 81.0165 |                             |       |         |            |            |       |
| NaN       | NaN     | NaN                    | 0     | 17084 | 1444 | 18514   | YDFEDENTSK                |   |   |   |    |   |   |   |   |    |         | _YDFEDENTSK_                |       |         |            |            |       |
| 20150306_ | yeast3_ | Top_opt_2ug_C3_01_1669 |       |       |      |         |                           |   |   |   |    |   |   |   |   |    |         | + 2                         | MULTI | CID TOF | Unmodified | diploid_04 | 18972 |
| 31.708    | 1       | 131510                 | 5588  | 0     | 10   | 578.32  | 1154.63                   | 0 | 0 | 0 | -1 | 0 | 0 | 0 | 0 | 8  | 50.1076 |                             |       |         |            |            |       |
| NaN       | NaN     | NaN                    | 0     | 17501 | 1469 | 18964   | TVVEPQNLQK                |   |   |   |    |   |   |   |   |    |         | _TVVEPQNLQK_                |       |         |            |            |       |
| 20150306_ | yeast3_ | Top_opt_2ug_C3_01_1669 |       |       |      |         |                           |   |   |   |    |   |   |   |   |    |         | + 2                         | MULTI | CID TOF | Unmodified | diploid_04 | 24236 |
| 39.214    | 1       | 136760                 | 1660  | 0     | 12   | 702.841 | 1403.67                   | 0 | 0 | 0 | -1 | 0 | 0 | 0 | 0 | 16 | 54.6504 |                             |       |         |            |            |       |
| NaN       | NaN     | NaN                    | 0     | 22473 | 1761 | 24220   | FDVNTPPQVNDK              |   |   |   |    |   |   |   |   |    |         | _FDVNTPPQVNDK_              |       |         |            |            |       |
| 20150306_ | yeast3_ | Top_opt_2ug_C3_01_1669 |       |       |      |         |                           |   |   |   |    |   |   |   |   |    |         | + 2                         | MULTI | CID TOF | Unmodified | diploid_04 | 27583 |
| 44.021    | 1       | 150300                 | 3665  | 0     | 19   | 994.474 | 1986.93                   | 0 | 0 | 0 | -1 | 0 | 0 | 0 | 0 | 15 | 54.8342 |                             |       |         |            |            |       |
| NaN       | NaN     | NaN                    | 0     | 25634 | 1947 | 27568   | QNEIPGGDYTPGNSPSVQK       |   |   |   |    |   |   |   |   |    |         | _QNEIPGGDYTPGNSPSVQK_       |       |         |            |            |       |
| P40955    | 175362  |                        |       |       |      |         |                           |   |   |   |    |   |   |   |   |    |         |                             |       |         |            |            |       |
| 20150306_ | yeast3_ | Top_opt_2ug_C3_01_1669 |       |       |      |         |                           |   |   |   |    |   |   |   |   |    |         | + 3                         | MULTI | CID TOF | Unmodified | diploid_04 | 28120 |
| 44.762    | 1       | 188220                 | 3406  | 0     | 23   | 892.704 | 2675.09                   | 0 | 0 | 0 | -1 | 0 | 0 | 0 | 0 | 12 | 153.562 |                             |       |         |            |            |       |
| NaN       | NaN     | NaN                    | 0     | 26141 | 1977 | 28108   | SSSTCDSLQVTCYCEHNSAVK     |   |   |   |    |   |   |   |   |    |         | _SSSTCDSLQVTCYCEHNSAVK_     |       |         |            |            |       |
| 20150306_ | yeast3_ | Top_opt_2ug_C3_01_1669 |       |       |      |         |                           |   |   |   |    |   |   |   |   |    |         | + 4                         | MULTI | CID TOF | Unmodified | diploid_04 | 30012 |
| 47.337    | 1       | 297360                 | 3421  | 0     | 23   | 671.344 | 2681.35                   | 0 | 0 | 0 | -1 | 0 | 0 | 0 | 0 | 14 | 62.193  |                             |       |         |            |            |       |
| NaN       | NaN     | NaN                    | 0     | 27928 | 2082 | 29998   | PNPSYDVENVNSRNQLVEPNRIK   |   |   |   |    |   |   |   |   |    |         | _PNPSYDVENVNSRNQLVEPNRIK_   |       |         |            |            |       |
| 20150306_ | yeast3_ | Top_opt_2ug_C3_01_1669 |       |       |      |         |                           |   |   |   |    |   |   |   |   |    |         | + 2                         | MULTI | CID TOF | Unmodified | diploid_04 | 30041 |
| 47.379    | 1       | 160250                 | 3752  | 0     | 8    | 479.765 | 957.516                   | 0 | 0 | 0 | -1 | 0 | 0 | 0 | 0 | 7  | 72.23   |                             |       |         |            |            |       |
| NaN       | NaN     | NaN                    | 0     | 27955 | 2084 | 30034   | NEIDQLVK                  |   |   |   |    |   |   |   |   |    |         | _NEIDQLVK_                  |       |         |            |            |       |
| 20150306_ | yeast3_ | Top_opt_2ug_C3_01_1669 |       |       |      |         |                           |   |   |   |    |   |   |   |   |    |         | + 2                         | MULTI | CID TOF | Unmodified | diploid_04 | 31018 |
| 48.693    | 1       | 184090                 | 7330  | 0     | 18   | 1079.94 | 2157.86                   | 0 | 0 | 0 | -1 | 0 | 0 | 0 | 0 | 12 | 120.9   |                             |       |         |            |            |       |
| NaN       | NaN     | NaN                    | 0     | 28878 | 2138 | 31006   | ANEIYEQSDCSSMGNYK         |   |   |   |    |   |   |   |   |    |         | _ANEIYEQSDCSSMGNYK_         |       |         |            |            |       |
| P36163    | 10482   |                        |       |       |      |         |                           |   |   |   |    |   |   |   |   |    |         |                             |       |         |            |            |       |
| 20150306_ | yeast3_ | Top_opt_2ug_C3_01_1669 |       |       |      |         |                           |   |   |   |    |   |   |   |   |    |         | + 2                         | MULTI | CID TOF | Unmodified | diploid_04 | 32550 |
| 50.862    | 1       | 194490                 | 4480  | 0     | 11   | 563.301 | 1124.59                   | 0 | 0 | 0 | -1 | 0 | 0 | 0 | 0 | 14 | 71.5242 |                             |       |         |            |            |       |
| NaN       | NaN     | NaN                    | 0     | 30325 | 2223 | 32536   | LLSSMGYVAGK               |   |   |   |    |   |   |   |   |    |         | _LLSSMGYVAGK_               |       |         |            |            |       |
| 20150306_ | yeast3_ | Top_opt_2ug_C3_01_1669 |       |       |      |         |                           |   |   |   |    |   |   |   |   |    |         | + 3                         | MULTI | CID TOF | Unmodified | diploid_04 | 33216 |
| 51.783    | 1       | 245260                 | 2465  | 0     | 22   | 833.054 | 2496.14                   | 0 | 0 | 0 | -1 | 0 | 0 | 0 | 0 | 14 | 52.6567 |                             |       |         |            |            |       |
| NaN       | NaN     | NaN                    | 0     | 30954 | 2260 | 33202   | ESNSNEDFNVDGNETTLQRISK    |   |   |   |    |   |   |   |   |    |         | _ESNSNEDFNVDGNETTLQRISK_    |       |         |            |            |       |
| 20150306_ | yeast3_ | Top_opt_2ug_C3_01_1669 |       |       |      |         |                           |   |   |   |    |   |   |   |   |    |         | + 4                         | MULTI | CID TOF | Unmodified | diploid_04 | 38786 |
| 59.546    | 1       | 259440                 | 3921  | 0     | 27   | 748.367 | 2989.44                   | 0 | 0 | 0 | -1 | 0 | 0 | 0 | 0 | 4  | 144.563 |                             |       |         |            |            |       |
| NaN       | NaN     | NaN                    | 0     | 36214 | 2570 | 38782   | PMPLSTDPSYVSSNTLSSEHELVEK |   |   |   |    |   |   |   |   |    |         | _PMPLSTDPSYVSSNTLSSEHELVEK_ |       |         |            |            |       |
| 20150306_ | yeast3_ | Top_opt_2ug_C3_01_1669 |       |       |      |         |                           |   |   |   |    |   |   |   |   |    |         | + 2                         | MULTI | CID TOF | Unmodified | diploid_04 | 38976 |
| 59.802    | 1       | 127040                 | 8038  | 0     | 8    | 451.288 | 900.562                   | 0 | 0 | 0 | -1 | 0 | 0 | 0 | 0 | 14 | 84.7431 |                             |       |         |            |            |       |
| NaN       | NaN     | NaN                    | 0     | 36394 | 2580 | 38962   | LLLQLSSK                  |   |   |   |    |   |   |   |   |    |         | _LLLQLSSK_                  |       |         |            |            |       |
| 20150306_ | yeast3_ | Top_opt_2ug_C3_01_1669 |       |       |      |         |                           |   |   |   |    |   |   |   |   |    |         | + 2                         | MULTI | CID TOF | Unmodified | diploid_04 | 39084 |
| 59.937    | 1       | 307770                 | 1639  | 0     | 14   | 818.911 | 1635.81                   | 0 | 0 | 0 | -1 | 0 | 0 | 0 | 0 | 14 | 56.514  |                             |       |         |            |            |       |



|                                                                                             |        |        |        |       |    |         |         |         |   |   |    |    |   |   |   |    |         |
|---------------------------------------------------------------------------------------------|--------|--------|--------|-------|----|---------|---------|---------|---|---|----|----|---|---|---|----|---------|
| 63019                                                                                       | 94.027 | 1      | 323090 | 12773 | 0  | 21      | 811.427 | 2431.26 | 0 | 0 | 0  | -1 | 0 | 0 | 0 | 0  | 9       |
| 124.076 NaNNaNNaN0 59101 3916 63010 MENPHEQVQANILSRIIGNVK                                   |        |        |        |       |    |         |         |         |   |   |    |    |   |   |   |    |         |
| _(ac)MENPHEQVQANILSRIIGNVK_P69851 142824                                                    |        |        |        |       |    |         |         |         |   |   |    |    |   |   |   |    |         |
| 20150306_yeast3_Top_opt_2ug_C3_01_1669 + 3 MULTI CID TOF Unmodified diploid_04 68127        |        |        |        |       |    |         |         |         |   |   |    |    |   |   |   |    |         |
| 101.82                                                                                      | 1      | 471690 | 10132  | 0     | 21 | 731.737 | 2192.19 | 0       | 0 | 0 | -1 | 0  | 0 | 0 | 0 | 5  | 80.1418 |
| NaNNaNNaN0 63925 4200 68122 VVYSGVFPPYTVPVGVLSGQK                                           |        |        |        |       |    |         |         |         |   |   |    |    |   |   |   |    |         |
| _VVYSGVFPPYTVPVGVLSGQK_ P13130 239284                                                       |        |        |        |       |    |         |         |         |   |   |    |    |   |   |   |    |         |
| 20150306_yeast3_Top_opt_2ug_C3_01_1669 + 3 MULTI CID TOF Unmodified diploid_04 68496        |        |        |        |       |    |         |         |         |   |   |    |    |   |   |   |    |         |
| 102.39                                                                                      | 1      | 364690 | 3024   | 0     | 29 | 1053.2  | 3156.58 | 0       | 0 | 0 | -1 | 0  | 0 | 0 | 0 | 14 | 41.2471 |
| NaNNaNNaN0 64274 4220 68482 TLASDDPIANPYRGIIESLNPIDETDLISK                                  |        |        |        |       |    |         |         |         |   |   |    |    |   |   |   |    |         |
| _TLASDDPIANPYRGIIESLNPIDETDLISK_ P29340 213318                                              |        |        |        |       |    |         |         |         |   |   |    |    |   |   |   |    |         |
| 20150306_yeast3_Top_opt_2ug_C3_01_1669 + 3 MULTI CID TOF Acetyl (Protein N-term) diploid_04 |        |        |        |       |    |         |         |         |   |   |    |    |   |   |   |    |         |
| 71744                                                                                       | 105.94 | 1      | 129910 | 4806  | 0  | 20      | 728.755 | 2183.24 | 0 | 0 | 0  | -1 | 0 | 0 | 0 | 0  | 4       |
| 142.258 NaNNaNNaN0 67341 4401 71740 SLISILSPLITSEGLDSRIK                                    |        |        |        |       |    |         |         |         |   |   |    |    |   |   |   |    |         |
| _(ac)SLISILSPLITSEGLDSRIK_ P53154 194699                                                    |        |        |        |       |    |         |         |         |   |   |    |    |   |   |   |    |         |
